# Supplementary material for: The Elephant in the room: What can we learn from California regarding the use of sport hunting of pumas (Puma concolor) as a management tool?
Source: PLoS One. 2020 Feb 13;15(2):e0224638. doi: 10.1371/journal.pone.0224638 (PMC7018503; doi:10.1371/journal.pone.0224638)
Supplement: S2 File — This is a zip file that contains sources of the data used in the analyses that are no longer available on the internet. (ZIP) [file pone.0224638.s003.zip]

Archive with 24 entries (24 files):
- 1995 California agricultural statistics.pdf
- 2004 California Agricultural statistics.pdf
- CA Mountain Lion Depredation 1972-2013 .pdf
- Califonina Mountain Lion Depredation 1972-2013 .pdf
- Cattle  predator death losses 1995.pdf
- Cattle death loss 1991.pdf
- Cattle predator loss 2000.pdf
- Cattle predator loss 2005.pdf
- CDFW_1998_DeerAssessment.pdf
- CO DOW Puma Damage by DAU.xls
- cougar_mortality_stats to 2018.pdf
- HuntAZ2009.pdf
- Montana deer kill 2004-2018.pdf
- Montana Mountain Lion EIS 1996.pdf
- Mountain Lion Monitoring and Management Strategy_Final_Adopted.pdf
- OR-A-ODFW-Broman-2018-Lion-Mortality.pdf
- Oregon sheep and lambs data.xls
- sheep predator loss 1990.pdf
- sheep predator loss 1994.pdf
- sheep predator loss 1999.pdf
- Sheep predator loss 2004.pdf
- WY-2006-Mountain-lion-management-plan.pdf
- Wyoming Big Game Report 2007.pdf
- Wyoming Mtn-Lion-Mortality-Report-HY2014.pdf
