# Supplementary material for: The Elephant in the room: What can we learn from California regarding the use of sport hunting of pumas (Puma concolor) as a management tool?
Source: PLoS One. 2020 Feb 13;15(2):e0224638. doi: 10.1371/journal.pone.0224638 (PMC7018503; doi:10.1371/journal.pone.0224638)
Supplement: S2 File — This is a zip file that contains sources of the data used in the analyses that are no longer available on the internet. (ZIP) [file pone.0224638.s003.zip › CA Mountain Lion Depredation 1972-2013 .pdf]

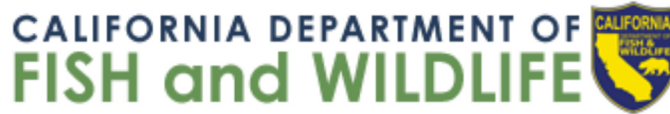

[Home](#) → [Wildlife](#) → [Mountain Lion](#) → **Depredation Statistics Summary**

## Mountain Lion Depredation Statistics Summary

Pursuant to California Fish and Game Code Section 4802 (et. Seq.), the Department of Fish and Wildlife shall, upon request, issue (depredation) permits to individuals reporting livestock loss or damage caused by mountain lions, if the loss or damage is confirmed by CDFW staff to have been caused by mountain lions. The permittee is required to report the fate of the permit to the CDFW upon expiration or fulfillment of the permit. Below is a summary of the annual number of depredation permits issued by the CDFW and the resultant take as reported to CDFW Headquarters. Please note that some permits and reports may be outstanding at the time of this compilation.

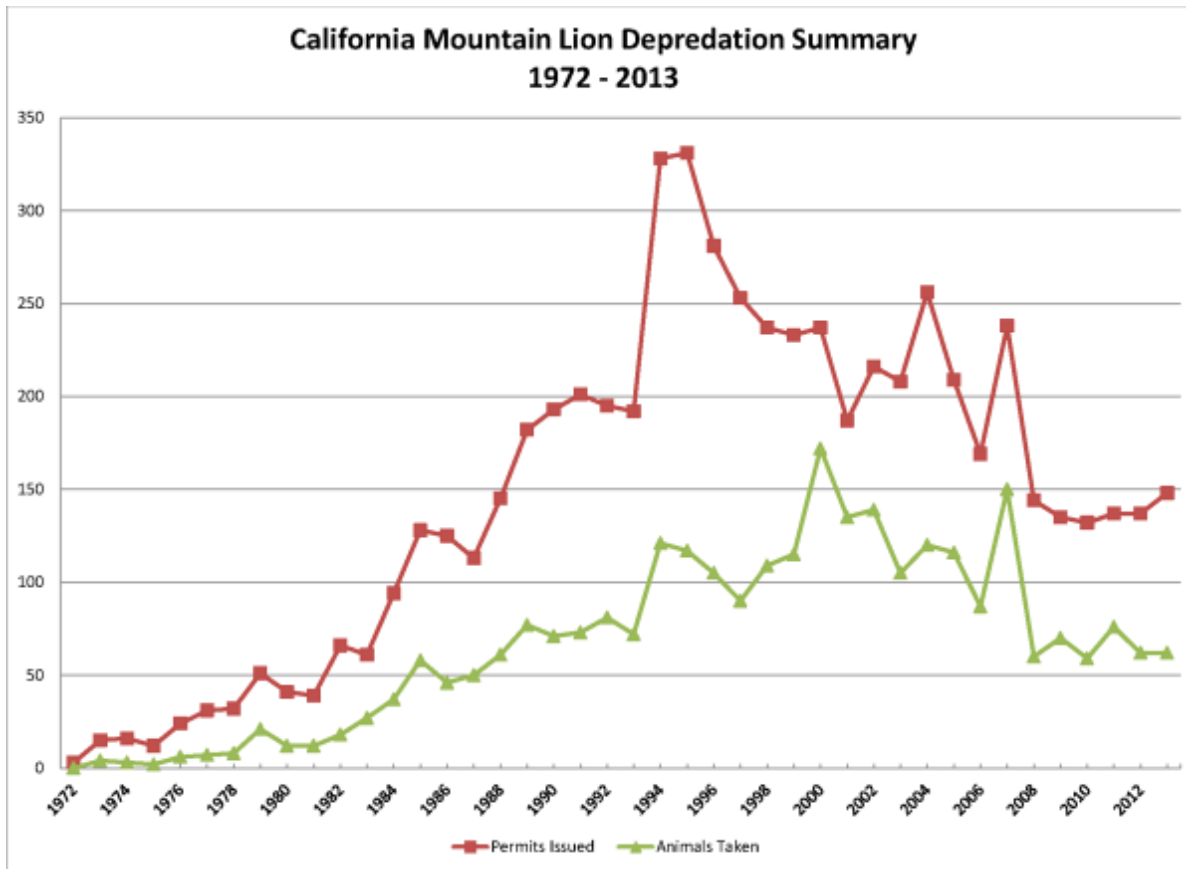

[Click Graph to Enlarge](#)

| Year | Depredation Permits Issued | Animals Taken |
|------|----------------------------|---------------|
| 1972 | 3                          | 0             |
| 1973 | 15                         | 4             |
| 1974 | 16                         | 3             |

|      |     |     |
|------|-----|-----|
| 1975 | 12  | 2   |
| 1976 | 24  | 6   |
| 1977 | 31  | 7   |
| 1978 | 32  | 8   |
| 1979 | 51  | 21  |
| 1980 | 41  | 12  |
| 1981 | 39  | 12  |
| 1982 | 66  | 18  |
| 1983 | 61  | 27  |
| 1984 | 94  | 37  |
| 1985 | 128 | 58  |
| 1986 | 125 | 46  |
| 1987 | 113 | 50  |
| 1988 | 145 | 61  |
| 1989 | 182 | 77  |
| 1990 | 193 | 71  |
| 1991 | 201 | 73  |
| 1992 | 195 | 81  |
| 1993 | 192 | 72  |
| 1994 | 328 | 121 |
| 1995 | 331 | 117 |
| 1996 | 281 | 105 |
| 1997 | 253 | 90  |
| 1998 | 237 | 109 |
| 1999 | 233 | 115 |
| 2000 | 237 | 172 |
| 2001 | 187 | 135 |
| 2002 | 216 | 139 |
| 2003 | 208 | 105 |
| 2004 | 256 | 120 |
| 2005 | 209 | 116 |
| 2006 | 169 | 87  |
| 2007 | 238 | 150 |

|              |             |             |
|--------------|-------------|-------------|
| 2008         | 144         | 60          |
| 2009         | 135         | 70          |
| 2010         | 132         | 59          |
| 2011         | 137         | 76          |
| 2012         | 137         | 62          |
| 2013         | 148         | 62          |
| <b>Total</b> | <b>6175</b> | <b>2816</b> |

Updated 01/29/2014

[Conditions of Use](#) | [Privacy Policy](#)
