# Supplementary material for: The Elephant in the room: What can we learn from California regarding the use of sport hunting of pumas (Puma concolor) as a management tool?
Source: PLoS One. 2020 Feb 13;15(2):e0224638. doi: 10.1371/journal.pone.0224638 (PMC7018503; doi:10.1371/journal.pone.0224638)
Supplement: S2 File — This is a zip file that contains sources of the data used in the analyses that are no longer available on the internet. (ZIP) [file pone.0224638.s003.zip › CO DOW Puma Damage by DAU.xls]

## Sheet: Sheet1
Colorado Puma Damage 1980 - Present by DAU and Damage Type																														CPI: Denver-Boulder-Greeley with 2000 as base year
Source: DOW Regional and Central Damage Claim files																														Source: United States Bureau of Labor Statistics
Updated: 07-22-02																														Accessed: December 2001
Indexed = Inflation adjustment to year 2000 dollars for Denver-Boulder-Greeley all consumers CPI - US Bureau of Labor Statistics
Other Stock includes goats, horses, captive wildlife, fowl, pigs, rabbits, and exotic domestic stock																															Year	1979	1980	1981	1982	1983	1984	1985	1986	1987	1988	1989	1990	1991	1992	1993	1994	1995	1996
																															Ann Avg	72.6	83.3	91.9	97.4	99	103.6	108	110.5	114.3	119	124.6	131.5	137.3	142	146.2	149.6	153.5	157.6
																															2000 Base Adjustment	2.40771	2.09844	1.90207	1.79466	1.76566	1.68726	1.61852	1.5819	1.52931	1.46891	1.40289	1.32928	1.27312	1.23099	1.19562	1.16845	1.13876	1.10914
DAU L-1		GMUs: 1, 2, 201	1979	1980	1981	1982	1983	1984	1985	1986	1987	1988	1989	1990	1991	1992	1993	1994	1995	1996	1997	1998	1999	2000	2001		3-Yr AVG
Sheep		# of Claims Paid	0	0	0	0	0	0	0	0	0	0	0	0	0	0	0		0	0	0	0	0	2	0		0.666667				September Lamb Prices/CWT	67.2	70.3	50.6	53.9	47.9	63.7	70.3	67.2	73.5	65.9	65.4	56.2	55.7	58.4	65.4	79.2	86.6	91.2
		# of Sheep	0	0	0	0	0	0	0	0	0	0	0	0	0	0	0		0	0	0	0	0	84	0		28				Indexed Lamb Prices/CWT	161.798	147.52	96.2446	96.7322	84.5749	107.478	113.782	106.304	112.404	96.801	91.749	74.7054	70.913	71.8896	78.1937	92.5412	98.6168	101.153
		Amount Paid	0	0	0	0	0	0	0	0	0	0	0	0	0	0	0		0	0	0	0	0	7277.64	0		2425.88
		Indexed Amount	0	0	0	0	0	0	0	0	0	0	0	0	0	0	0	0	0	0	0	0	0	7277.64	0		2425.88
Cattle		# of Claims Paid	0	0	0	0	0	0	0	0	0	0	0	0	0	0	0		0	0	0	0	0	0	0		0
		# of Cattle	0	0	0	0	0	0	0	0	0	0	0	0	0	0	0		0	0	0	0	0	0	0		0
		Amount Paid	0	0	0	0	0	0	0	0	0	0	0	0	0	0	0		0	0	0	0	0	0	0		0
		Indexed Amount	0	0	0	0	0	0	0	0	0	0	0	0	0	0	0	0	0	0	0	0	0	0	0		0
Other Stock		# of Claims Paid	0	0	0	0	0	0	0	0	0	0	0	0	0	0	0		0	0	0	0	0	0	0		0
		# of Animals	0	0	0	0	0	0	0	0	0	0	0	0	0	0	0		0	0	0	0	0	0	0		0
		Amount Paid	0	0	0	0	0	0	0	0	0	0	0	0	0	0	0		0	0	0	0	0	0	0		0
		Indexed Amount	0	0	0	0	0	0	0	0	0	0	0	0	0	0	0	0	0	0	0	0	0	0	0		0
		DAU - # of Claims	0	0	0	0	0	0	0	0	0	0	0	0	0	0	0	0	0	0	0	0	0	2	0		0.666667
		DAU - Amount Paid	0	0	0	0	0	0	0	0	0	0	0	0	0	0	0	0	0	0	0	0	0	7277.64	0		2425.88
		DAU - Indexed Amount	0	0	0	0	0	0	0	0	0	0	0	0	0	0	0	0	0	0	0	0	0	7277.64	0		2425.88
DAU L-2		GMUs: 3, 301, 4, 441, 5, 14, 214	1979	1980	1981	1982	1983	1984	1985	1986	1987	1988	1989	1990	1991	1992	1993	1994	1995	1996	1997	1998	1999	2000	2001		3-Yr AVG
Sheep		# of Claims Paid	0	1	0	1	0	1	1	0	0	1	3	4	7	5	6		5	5	2	0	0	0	0		0
		# of Sheep	0	164	0	33	0	24	8	0	0	417	216	46	103	130	327		227	176	47	0	0	0	0		0
		Amount Paid	0	2925	0	1444.72	0	1282.5	650	0	0	32720	16117.8	2833.38	6494.03	7481.13	26134.2		22326.5	18484.5	5291.94	0	0	0	0		0
		Indexed Amount	0	6137.94	0	2592.78	0	2163.91	1052.04	0	0	48062.7	22611.5	3766.35	8267.71	9209.17	31246.6	0	25424.6	20501.9	5731.3	0	0	0	0		0
Cattle		# of Claims Paid	0	0	0	0	0	0	0	0	0	0	0	0	0	0	0		1	0	0	0	0	0	0		0
		# of Cattle	0	0	0	0	0	0	0	0	0	0	0	0	0	0	0		1	0	0	0	0	0	0		0
		Amount Paid	0	0	0	0	0	0	0	0	0	0	0	0	0	0	0		60	0	0	0	0	0	0		0
		Indexed Amount	0	0	0	0	0	0	0	0	0	0	0	0	0	0	0	0	68.3257	0	0	0	0	0	0		0
Other Stock		# of Claims Paid	0	0	0	0	1	0	0	0	0	0	0	0	0	1	2		0	0	0	0	1	0	0		0.333333
		# of Animals	0	0	0	0	3	0	0	0	0	0	0	0	0	2	2		0	0	0	0	1	0	0		0.333333
		Amount Paid	0	0	0	0	3400	0	0	0	0	0	0	0	0	80	1070		0	0	0	0	316.31	0	0		105.437
		Indexed Amount	0	0	0	0	6003.23	0	0	0	0	0	0	0	0	98.4789	1279.32	0	0	0	0	0	327.359	0	0		109.12
		DAU - # of Claims	0	1	0	1	1	1	1	0	0	1	3	4	7	6	8	0	6	5	2	0	1	0	0		0.333333
		DAU - Amount Paid	0	2925	0	1444.72	3400	1282.5	650	0	0	32720	16117.8	2833.38	6494.03	7561.13	27204.2	0	22386.5	18484.5	5291.94	0	316.31	0	0		105.437
		DAU - Indexed Amount	0	6137.94	0	2592.78	6003.23	2163.91	1052.04	0	0	48062.7	22611.5	3766.35	8267.71	9307.64	32525.9	0	25493	20501.9	5731.3	0	327.359	0	0		109.12
DAU L-3		GMUs: 6, 16, 161, 17, 171	1979	1980	1981	1982	1983	1984	1985	1986	1987	1988	1989	1990	1991	1992	1993	1994	1995	1996	1997	1998	1999	2000	2001		3-Yr AVG
Sheep		# of Claims Paid	0	0	0	0	0	0	0	0	0	0	0	0	0	0	0		0	0	0	0	0	0	0		0
		# of Sheep	0	0	0	0	0	0	0	0	0	0	0	0	0	0	0		0	0	0	0	0	0	0		0
		Amount Paid	0	0	0	0	0	0	0	0	0	0	0	0	0	0	0		0	0	0	0	0	0	0		0
		Indexed Amount	0	0	0	0	0	0	0	0	0	0	0	0	0	0	0	0	0	0	0	0	0	0	0		0
Cattle		# of Claims Paid	0	0	0	0	0	0	0	0	0	0	0	0	0	0	0		0	0	0	0	0	0	0		0
		# of Cattle	0	0	0	0	0	0	0	0	0	0	0	0	0	0	0		0	0	0	0	0	0	0		0
		Amount Paid	0	0	0	0	0	0	0	0	0	0	0	0	0	0	0		0	0	0	0	0	0	0		0
		Indexed Amount	0	0	0	0	0	0	0	0	0	0	0	0	0	0	0	0	0	0	0	0	0	0	0		0
Other Stock		# of Claims Paid	0	0	0	0	0	0	0	0	0	0	0	0	0	0	0		0	0	0	0	0	0	0		0
		# of Animals	0	0	0	0	0	0	0	0	0	0	0	0	0	0	0		0	0	0	0	0	0	0		0
		Amount Paid	0	0	0	0	0	0	0	0	0	0	0	0	0	0	0		0	0	0	0	0	0	0		0
		Indexed Amount	0	0	0	0	0	0	0	0	0	0	0	0	0	0	0	0	0	0	0	0	0	0	0		0
		DAU - # of Claims	0	0	0	0	0	0	0	0	0	0	0	0	0	0	0	0	0	0	0	0	0	0	0		0
		DAU - Amount Paid	0	0	0	0	0	0	0	0	0	0	0	0	0	0	0	0	0	0	0	0	0	0	0		0
		DAU - Indexed Amount	0	0	0	0	0	0	0	0	0	0	0	0	0	0	0	0	0	0	0	0	0	0	0		0
DAU L-4		GMUs: 7, 8, 9, 19, 191, 20	1979	1980	1981	1982	1983	1984	1985	1986	1987	1988	1989	1990	1991	1992	1993	1994	1995	1996	1997	1998	1999	2000	2001		3-Yr AVG
Sheep		# of Claims Paid	0	0	0	0	0	0	0	0	0	0	0	1	0	1	3		1	0	0	1	0	0	2		0.666667
		# of Sheep	0	0	0	0	0	0	0	0	0	0	0	3	0	2	16		1	0	0	7	0	0	2		0.666667
		Amount Paid	0	0	0	0	0	0	0	0	0	0	0	300	0	60	780.25		72	0	0	1225	0	0	127		42.3333
		Indexed Amount	0	0	0	0	0	0	0	0	0	0	0	398.783	0	73.8592	932.884	0	81.9909	0	0	1302.49	0	0	122.514		40.8381
Cattle		# of Claims Paid	0	0	0	0	0	0	0	0	0	0	0	1	0	0	1		1	0	0	0	0	0	0		0
		# of Cattle	0	0	0	0	0	0	0	0	0	0	0	1	0	0	1		2	0	0	0	0	0	0		0
		Amount Paid	0	0	0	0	0	0	0	0	0	0	0	700	0	0	282.5		370	0	0	0	0	0	0		0
		Indexed Amount	0	0	0	0	0	0	0	0	0	0	0	930.494	0	0	337.763	0	421.342	0	0	0	0	0	0		0
Other Stock		# of Claims Paid	0	0	1	0	0	0	0	0	0	1	1	1	2	1	1		4	4	0	4	2	1	2		1.66667
		# of Animals	0	0	1	0	0	0	0	0	0	1	1	3	7	2	1		7	5	0	10	4	3	3		3.33333
		Amount Paid	0	0	1000	0	0	0	0	0	0	1500	105	500	2900	100	500		2437.9	5052.22	0	11385	900	3000	480		1460
		Indexed Amount	0	0	1902.07	0	0	0	0	0	0	2203.36	147.303	664.639	3692.06	123.099	597.811	0	2776.19	5603.6	0	12105.2	931.439	3000	463.046		1464.83
		DAU - # of Claims	0	0	1	0	0	0	0	0	0	1	1	3	2	2	5	0	6	4	0	5	2	1	4		2.33333
		DAU - Amount Paid	0	0	1000	0	0	0	0	0	0	1500	105	1500	2900	160	1562.75	0	2879.9	5052.22	0	12610	900	3000	607		1502.33
		DAU - Indexed Amount	0	0	1902.07	0	0	0	0	0	0	2203.36	147.303	1993.92	3692.06	196.958	1868.46	0	3279.52	5603.6	0	13407.7	931.439	3000	585.561		1505.67
DAU L-5		GMUs: 18, 181, 27, 28, 37, 371	1979	1980	1981	1982	1983	1984	1985	1986	1987	1988	1989	1990	1991	1992	1993	1994	1995	1996	1997	1998	1999	2000	2001		3-Yr AVG
Sheep		# of Claims Paid	0	0	0	0	0	0	0	0	0	0	0	0	0	0	0		0	0	0	0	0	0	1		0.333333
		# of Sheep	0	0	0	0	0	0	0	0	0	0	0	0	0	0	0		0	0	0	0	0	0	1		0.333333
		Amount Paid	0	0	0	0	0	0	0	0	0	0	0	0	0	0	0		0	0	0	0	0	0	120		40
		Indexed Amount	0	0	0	0	0	0	0	0	0	0	0	0	0	0	0	0	0	0	0	0	0	0	115.762		38.5872
Cattle		# of Claims Paid	0	0	0	0	0	0	0	0	0	0	0	0	1	0	0		0	0	0	0	0	0	0		0
		# of Cattle	0	0	0	0	0	0	0	0	0	0	0	0	1	0	0		0	0	0	0	0	0	0		0
		Amount Paid	0	0	0	0	0	0	0	0	0	0	0	0	450	0	0		0	0	0	0	0	0	0		0
		Indexed Amount	0	0	0	0	0	0	0	0	0	0	0	0	572.906	0	0	0	0	0	0	0	0	0	0		0
Other Stock		# of Claims Paid	0	0	0	0	0	0	0	0	0	0	0	0	0	0	0		0	0	0	0	0	1	0		0.333333
		# of Animals	0	0	0	0	0	0	0	0	0	0	0	0	0	0	0		0	0	0	0	0	1	0		0.333333
		Amount Paid	0	0	0	0	0	0	0	0	0	0	0	0	0	0	0		0	0	0	0	0	800	0		266.667
		Indexed Amount	0	0	0	0	0	0	0	0	0	0	0	0	0	0	0	0	0	0	0	0	0	800	0		266.667
		DAU - # of Claims	0	0	0	0	0	0	0	0	0	0	0	0	1	0	0	0	0	0	0	0	0	1	1		0.666667
		DAU - Amount Paid	0	0	0	0	0	0	0	0	0	0	0	0	450	0	0	0	0	0	0	0	0	800	120		306.667
		DAU - Indexed Amount	0	0	0	0	0	0	0	0	0	0	0	0	572.906	0	0	0	0	0	0	0	0	800	115.762		305.254
DAU L-6		GMUs: 15, 25, 26, 34, 35, 36	1979	1980	1981	1982	1983	1984	1985	1986	1987	1988	1989	1990	1991	1992	1993	1994	1995	1996	1997	1998	1999	2000	2001		3-Yr AVG
Sheep		# of Claims Paid	1	0	0	1	0	0	0	0	0	0	2	0	4	4	3		5	2	0	2	1	1	1		1
		# of Sheep	4	0	0	3	0	0	0	0	0	0	9	0	49	42	36		84	6	0	6	2	2	1		1.66667
		Amount Paid	400	0	0	62.63	0	0	0	0	0	0	660	0	2640.82	2588.98	2767.39		8724.67	759.16	0	776.25	179.82	162	48.26		130.027
		Indexed Amount	963.085	0	0	112.4	0	0	0	0	0	0	925.907	0	3362.09	3187	3308.75	0	9935.32	842.012	0	825.356	186.101	162	46.5555		131.552
Cattle		# of Claims Paid	0	0	0	1	0	1	0	0	0	0	0	0	0	0	1		0	0	0	0	1	1	2		1.33333
		# of Cattle	0	0	0	1	0	1	0	0	0	0	0	0	0	0	2		0	0	0	0	4	1	2		2.33333
		Amount Paid	0	0	0	125	0	379	0	0	0	0	0	0	0	0	887		0	0	0	0	1615.84	594.58	1390.66		1200.36
		Indexed Amount	0	0	0	224.333	0	639.471	0	0	0	0	0	0	0	0	1060.52	0	0	0	0	0	1672.28	594.58	1341.54		1202.8
Other Stock		# of Claims Paid	0	0	0	0	0	0	0	0	0	1	0	0	0	0	0		0	0	0	0	0	0	0		0
		# of Animals	0	0	0	0	0	0	0	0	0	1	0	0	0	0	0		0	0	0	0	0	0	0		0
		Amount Paid	0	0	0	0	0	0	0	0	0	300	0	0	0	0	0		0	0	0	0	0	0	0		0
		Indexed Amount	0	0	0	0	0	0	0	0	0	440.672	0	0	0	0	0	0	0	0	0	0	0	0	0		0
		DAU - # of Claims	1	0	0	2	0	1	0	0	0	1	2	0	4	4	4	0	5	2	0	2	2	2	3		2.33333
		DAU - Amount Paid	400	0	0	187.63	0	379	0	0	0	300	660	0	2640.82	2588.98	3654.39	0	8724.67	759.16	0	776.25	1795.66	756.58	1438.92		1330.39
		DAU - Indexed Amount	963.085	0	0	336.732	0	639.471	0	0	0	440.672	925.907	0	3362.09	3187	4369.27	0	9935.32	842.012	0	825.356	1858.39	756.58	1388.1		1334.35
DAU L-7		GMUs: 10, 11, 211, 12, 13, 131, 231, 21, 22, 23, 24	1979	1980	1981	1982	1983	1984	1985	1986	1987	1988	1989	1990	1991	1992	1993	1994	1995	1996	1997	1998	1999	2000	2001		3-Yr AVG
Sheep		# of Claims Paid	1	2	5	7	6	1	4	8	11	6	5	8	8	16	15		19	16	25	19	10	9	9		9.33333
		# of Sheep	14	7	49	94	31	7	19	69	141	46	127	160	86	290	428		491	546	902	411	192	253	309		251.333
		Amount Paid	920.22	365	3270	4028.96	2814.06	469	1796.36	5088.6	13477	3583.27	10224.9	11022.5	5557.79	19068.9	33015.3		47011.7	56359.2	104837	38597.8	17244.8	24654.5	28640.9		23513.4
		Indexed Amount	2215.63	765.93	6219.76	7230.62	4968.66	791.324	2907.44	8049.66	20610.5	5263.49	14344.4	14652	7075.76	23473.6	39473.8	0	53535.1	62510.1	113541	41039.6	17847.2	24654.5	27629.3		23377
Cattle		# of Claims Paid	0	0	0	0	0	0	0	0	0	0	0	0	0	0	0		0	0	0	2	0	1	0		0.333333
		# of Cattle	0	0	0	0	0	0	0	0	0	0	0	0	0	0	0		0	0	0	11	0	1	0		0.333333
		Amount Paid	0	0	0	0	0	0	0	0	0	0	0	0	0	0	0		0	0	0	6340	0	441.61	0		147.203
		Indexed Amount	0	0	0	0	0	0	0	0	0	0	0	0	0	0	0	0	0	0	0	6741.07	0	441.61	0		147.203
Other Stock		# of Claims Paid	0	0	0	0	0	0	0	0	0	0	0	0	0	0	0		2	1	1	0	0	0	0		0
		# of Animals	0	0	0	0	0	0	0	0	0	0	0	0	0	0	0		4	1	3	0	0	0	0		0
		Amount Paid	0	0	0	0	0	0	0	0	0	0	0	0	0	0	0		356.75	1800	385	0	0	0	0		0
		Indexed Amount	0	0	0	0	0	0	0	0	0	0	0	0	0	0	0	0	406.253	1996.45	416.964	0	0	0	0		0
		DAU - # of Claims	1	2	5	7	6	1	4	8	11	6	5	8	8	16	15	0	21	17	26	21	10	10	9		9.66667
		DAU - Amount Paid	920.22	365	3270	4028.96	2814.06	469	1796.36	5088.6	13477	3583.27	10224.9	11022.5	5557.79	19068.9	33015.3	0	47368.4	58159.2	105222	44937.8	17244.8	25096.1	28640.9		23660.6
		DAU - Indexed Amount	2215.63	765.93	6219.76	7230.62	4968.66	791.324	2907.44	8049.66	20610.5	5263.49	14344.4	14652	7075.76	23473.6	39473.8	0	53941.4	64506.6	113958	47780.6	17847.2	25096.1	27629.3		23524.2
DAU L-8		GMUs: 30, 31, 32, 33	1979	1980	1981	1982	1983	1984	1985	1986	1987	1988	1989	1990	1991	1992	1993	1994	1995	1996	1997	1998	1999	2000	2001		3-Yr AVG
Sheep		# of Claims Paid	2	1	3	6	2	1	1	1	2	5	7	5	2	7	4		7	3	2	2	3	3	2		2.66667
		# of Sheep	32	24	38	143	25	6	44	2	18	50	85	120	13	86	24		88	87	20	114	105	66	31		67.3333
		Amount Paid	2089.54	1916.75	2053.25	7595.75	1411.54	384.94	2688.24	150.5	2301.39	3833.56	7624.4	9246.48	880.5	5888.44	1931		9667.7	8638.42	4181.5	12142	10034.7	7898.92	2740		6891.2
		Indexed Amount	5031.01	4022.18	3905.42	13631.8	2492.29	649.493	4350.97	238.076	3519.54	5631.15	10696.2	12291.1	1120.99	7248.59	2308.75	0	11009.2	9581.19	4528.66	12910.1	10385.2	7898.92	2643.22		6975.78
Cattle		# of Claims Paid	0	0	0	0	0	0	0	0	0	0	1	0	0	0	0		0	0	0	1	0	1	0		0.333333
		# of Cattle	0	0	0	0	0	0	0	0	0	0	2	0	0	0	0		0	0	0	1	0	1	0		0.333333
		Amount Paid	0	0	0	0	0	0	0	0	0	0	580	0	0	0	0		0	0	0	200	0	722.5	0		240.833
		Indexed Amount	0	0	0	0	0	0	0	0	0	0	813.676	0	0	0	0	0	0	0	0	212.652	0	722.5	0		240.833
Other Stock		# of Claims Paid	0	0	0	0	0	0	0	0	0	0	0	0	1	0	1		0	0	0	0	1	0	0		0.333333
		# of Animals	0	0	0	0	0	0	0	0	0	0	0	0	2	0	1		0	0	0	0	10	0	0		3.33333
		Amount Paid	0	0	0	0	0	0	0	0	0	0	0	0	1000	0	1550		0	0	0	0	1400	0	0		466.667
		Indexed Amount	0	0	0	0	0	0	0	0	0	0	0	0	1273.12	0	1853.21	0	0	0	0	0	1448.9	0	0		482.968
		DAU - # of Claims	2	1	3	6	2	1	1	1	2	5	8	5	3	7	5	0	7	3	2	3	4	4	2		3.33333
		DAU - Amount Paid	2089.54	1916.75	2053.25	7595.75	1411.54	384.94	2688.24	150.5	2301.39	3833.56	8204.4	9246.48	1880.5	5888.44	3481	0	9667.7	8638.42	4181.5	12342	11434.7	8621.42	2740		7598.7
		DAU - Indexed Amount	5031.01	4022.18	3905.42	13631.8	2492.29	649.493	4350.97	238.076	3519.54	5631.15	11509.9	12291.1	2394.11	7248.59	4161.96	0	11009.2	9581.19	4528.66	13122.8	11834.1	8621.42	2643.22		7699.59
DAU L-9		GMUs: 41, 411, 42, 421, 52, 521, 53, 63, 64	1979	1980	1981	1982	1983	1984	1985	1986	1987	1988	1989	1990	1991	1992	1993	1994	1995	1996	1997	1998	1999	2000	2001		3-Yr AVG
Sheep		# of Claims Paid	0	0	1	0	1	0	0	0	3	1	0	0	2	2	5		5	3	3	1	2	2	1		1.66667
		# of Sheep	0	0	17	0	13	0	0	0	23	2	0	0	15	9	37		23	6	5	1	8	6	7		7
		Amount Paid	0	0	717	0	1250	0	0	0	2635	152	0	0	910.76	588.9	2694.5		2082.18	570	434.4	92	671.5	504	602		592.5
		Indexed Amount	0	0	1363.78	0	2207.07	0	0	0	4029.73	223.274	0	0	1159.51	724.928	3221.6	0	2371.11	632.208	470.465	97.82	694.957	504	580.737		593.231
Cattle		# of Claims Paid	0	0	0	0	0	0	0	0	0	0	0	0	4	1	0		0	0	1	1	1	2	1		1.33333
		# of Cattle	0	0	0	0	0	0	0	0	0	0	0	0	6	1	0		0	0	1	4	1	2	1		1.33333
		Amount Paid	0	0	0	0	0	0	0	0	0	0	0	0	3270.27	500	0		0	0	175	500	150	953.72	420.37		508.03
		Indexed Amount	0	0	0	0	0	0	0	0	0	0	0	0	4163.46	615.493	0	0	0	0	189.529	531.63	155.24	953.72	405.522		504.827
Other Stock		# of Claims Paid	0	0	0	0	0	0	0	0	0	0	0	0	0	0	2		2	1	2	0	2	3	1		2
		# of Animals	0	0	0	0	0	0	0	0	0	0	0	0	0	0	304		2	4	101	0	3	5	1		3
		Amount Paid	0	0	0	0	0	0	0	0	0	0	0	0	0	0	1160		6000	450	3000	0	2810	22469	12500		12593
		Indexed Amount	0	0	0	0	0	0	0	0	0	0	0	0	0	0	1386.92	0	6832.57	499.112	3249.07	0	2908.16	22469	12058.5		12478.6
		DAU - # of Claims	0	0	1	0	1	0	0	0	3	1	0	0	6	3	7	0	7	4	6	2	5	7	3		5
		DAU - Amount Paid	0	0	717	0	1250	0	0	0	2635	152	0	0	4181.03	1088.9	3854.5	0	8082.18	1020	3609.4	592	3631.5	23926.7	13522.4		13693.5
		DAU - Indexed Amount	0	0	1363.78	0	2207.07	0	0	0	4029.73	223.274	0	0	5322.97	1340.42	4608.53	0	9203.68	1131.32	3909.07	629.45	3758.36	23926.7	13044.8		13576.6
DAU L-10		GMUs: 43, 44, 444, 47, 471	1979	1980	1981	1982	1983	1984	1985	1986	1987	1988	1989	1990	1991	1992	1993	1994	1995	1996	1997	1998	1999	2000	2001		3-Yr AVG
Sheep		# of Claims Paid	0	0	0	0	0	0	0	0	0	0	1	1	0	1	1		1	3	1	1	0	0	0		0
		# of Sheep	0	0	0	0	0	0	0	0	0	0	90	8	0	2	15		2	33	1	6	0	0	0		0
		Amount Paid	0	0	0	0	0	0	0	0	0	0	6305	560	0	95	1274.2		212.5	1782.62	103.5	558	0	0	0		0
		Indexed Amount	0	0	0	0	0	0	0	0	0	0	8845.22	744.395	0	116.944	1523.46	0	241.987	1977.17	112.093	593.299	0	0	0		0
Cattle		# of Claims Paid	0	0	0	0	0	0	0	0	0	0	0	0	0	0	0		0	0	1	0	0	0	0		0
		# of Cattle	0	0	0	0	0	0	0	0	0	0	0	0	0	0	0		0	0	2	0	0	0	0		0
		Amount Paid	0	0	0	0	0	0	0	0	0	0	0	0	0	0	0		0	0	1302	0	0	0	0		0
		Indexed Amount	0	0	0	0	0	0	0	0	0	0	0	0	0	0	0	0	0	0	1410.1	0	0	0	0		0
Other Stock		# of Claims Paid	0	0	0	0	0	0	0	0	1	0	0	0	0	1	0		1	0	0	0	0	0	1		0.333333
		# of Animals	0	0	0	0	0	0	0	0	1	0	0	0	0	4	0		1	0	0	0	0	0	2		0.666667
		Amount Paid	0	0	0	0	0	0	0	0	84.2	0	0	0	0	554	0		300	0	0	0	0	0	80		26.6667
		Indexed Amount	0	0	0	0	0	0	0	0	128.768	0	0	0	0	681.966	0	0	341.629	0	0	0	0	0	77.1744		25.7248
		DAU - # of Claims	0	0	0	0	0	0	0	0	1	0	1	1	0	2	1	0	2	3	2	1	0	0	1		0.333333
		DAU - Amount Paid	0	0	0	0	0	0	0	0	84.2	0	6305	560	0	649	1274.2	0	512.5	1782.62	1405.5	558	0	0	80		26.6667
		DAU - Indexed Amount	0	0	0	0	0	0	0	0	128.768	0	8845.22	744.395	0	798.91	1523.46	0	583.616	1977.17	1522.19	593.299	0	0	77.1744		25.7248
DAU L-11		GMUs: 48, 481, 49, 56, 561	1979	1980	1981	1982	1983	1984	1985	1986	1987	1988	1989	1990	1991	1992	1993	1994	1995	1996	1997	1998	1999	2000	2001		3-Yr AVG
Sheep		# of Claims Paid	0	0	0	0	0	0	0	0	0	0	0	0	0	0	0		0	0	0	0	0	0	0		0
		# of Sheep	0	0	0	0	0	0	0	0	0	0	0	0	0	0	0		0	0	0	0	0	0	0		0
		Amount Paid	0	0	0	0	0	0	0	0	0	0	0	0	0	0	0		0	0	0	0	0	0	0		0
		Indexed Amount	0	0	0	0	0	0	0	0	0	0	0	0	0	0	0	0	0	0	0	0	0	0	0		0
Cattle		# of Claims Paid	0	0	0	0	0	0	0	0	0	0	0	0	0	0	0		0	0	0	0	0	0	0		0
		# of Cattle	0	0	0	0	0	0	0	0	0	0	0	0	0	0	0		0	0	0	0	0	0	0		0
		Amount Paid	0	0	0	0	0	0	0	0	0	0	0	0	0	0	0		0	0	0	0	0	0	0		0
		Indexed Amount	0	0	0	0	0	0	0	0	0	0	0	0	0	0	0	0	0	0	0	0	0	0	0		0
Other Stock		# of Claims Paid	0	0	0	0	0	0	0	0	0	0	0	0	0	0	0		0	0	0	0	0	0	0		0
		# of Animals	0	0	0	0	0	0	0	0	0	0	0	0	0	0	0		0	0	0	0	0	0	0		0
		Amount Paid	0	0	0	0	0	0	0	0	0	0	0	0	0	0	0		0	0	0	0	0	0	0		0
		Indexed Amount	0	0	0	0	0	0	0	0	0	0	0	0	0	0	0	0	0	0	0	0	0	0	0		0
		DAU - # of Claims	0	0	0	0	0	0	0	0	0	0	0	0	0	0	0	0	0	0	0	0	0	0	0		0
		DAU - Amount Paid	0	0	0	0	0	0	0	0	0	0	0	0	0	0	0	0	0	0	0	0	0	0	0		0
		DAU - Indexed Amount	0	0	0	0	0	0	0	0	0	0	0	0	0	0	0	0	0	0	0	0	0	0	0		0
DAU L-12		GMUs: 29, 38, 39, 391, 46, 461, 51, 104	1979	1980	1981	1982	1983	1984	1985	1986	1987	1988	1989	1990	1991	1992	1993	1994	1995	1996	1997	1998	1999	2000	2001		3-Yr AVG
Sheep		# of Claims Paid	0	0	0	0	0	0	0	0	0	0	0	0	0	0	0		1	2	0	0	0	0	0		0
		# of Sheep	0	0	0	0	0	0	0	0	0	0	0	0	0	0	0		1	4	0	0	0	0	0		0
		Amount Paid	0	0	0	0	0	0	0	0	0	0	0	0	0	0	0		83.56	372.36	0	0	0	0	0		0
		Indexed Amount	0	0	0	0	0	0	0	0	0	0	0	0	0	0	0	0	95.155	412.998	0	0	0	0	0		0
Cattle		# of Claims Paid	0	0	0	0	0	0	0	0	0	0	0	0	0	0	0		0	0	0	0	0	0	0		0
		# of Cattle	0	0	0	0	0	0	0	0	0	0	0	0	0	0	0		0	0	0	0	0	0	0		0
		Amount Paid	0	0	0	0	0	0	0	0	0	0	0	0	0	0	0		0	0	0	0	0	0	0		0
		Indexed Amount	0	0	0	0	0	0	0	0	0	0	0	0	0	0	0	0	0	0	0	0	0	0	0		0
Other Stock		# of Claims Paid	0	0	0	1	3	0	0	0	0	0	1	1	1	0	0		0	3	1	5	2	5	2		3
		# of Animals	0	0	0	1	16	0	0	0	0	0	2	1	3	0	0		0	3	1	8	3	17	5		8.33333
		Amount Paid	0	0	0	50	560	0	0	0	0	0	11200	421	3600	0	0		0	372.5	191.8	4863	110	9091.25	9247.5		6149.58
		Indexed Amount	0	0	0	89.7331	988.768	0	0	0	0	0	15712.4	559.626	4583.25	0	0	0	0	413.154	207.724	5170.64	113.843	9091.25	8920.88		6041.99
		DAU - # of Claims	0	0	0	1	3	0	0	0	0	0	1	1	1	0	0	0	1	5	1	5	2	5	2		3
		DAU - Amount Paid	0	0	0	50	560	0	0	0	0	0	11200	421	3600	0	0	0	83.56	744.86	191.8	4863	110	9091.25	9247.5		6149.58
		DAU - Indexed Amount	0	0	0	89.7331	988.768	0	0	0	0	0	15712.4	559.626	4583.25	0	0	0	95.155	826.152	207.724	5170.64	113.843	9091.25	8920.88		6041.99
DAU L-13		GMUs: 50, 500, 501	1979	1980	1981	1982	1983	1984	1985	1986	1987	1988	1989	1990	1991	1992	1993	1994	1995	1996	1997	1998	1999	2000	2001		3-Yr AVG
Sheep		# of Claims Paid	0	0	0	0	0	0	0	0	0	0	0	0	0	0	0		0	0	0	0	0	0	0		0
		# of Sheep	0	0	0	0	0	0	0	0	0	0	0	0	0	0	0		0	0	0	0	0	0	0		0
		Amount Paid	0	0	0	0	0	0	0	0	0	0	0	0	0	0	0		0	0	0	0	0	0	0		0
		Indexed Amount	0	0	0	0	0	0	0	0	0	0	0	0	0	0	0	0	0	0	0	0	0	0	0		0
Cattle		# of Claims Paid	0	0	0	0	0	0	0	0	0	0	0	0	0	0	0		0	0	0	0	0	0	1		0.333333
		# of Cattle	0	0	0	0	0	0	0	0	0	0	0	0	0	0	0		0	0	0	0	0	0	1		0.333333
		Amount Paid	0	0	0	0	0	0	0	0	0	0	0	0	0	0	0		0	0	0	0	0	0	650		216.667
		Indexed Amount	0	0	0	0	0	0	0	0	0	0	0	0	0	0	0	0	0	0	0	0	0	0	627.042		209.014
Other Stock		# of Claims Paid	0	0	0	0	0	1	0	1	0	1	0	0	0	1	0		1	0	0	0	0	0	0		0
		# of Animals	0	0	0	0	0	1	0	1	0	10	0	0	0	1	0		3	0	0	0	0	0	0		0
		Amount Paid	0	0	0	0	0	103.5	0	450	0	65	0	0	0	800	0		207	0	0	0	0	0	0		0
		Indexed Amount	0	0	0	0	0	174.631	0	711.855	0	95.479	0	0	0	984.789	0	0	235.724	0	0	0	0	0	0		0
		DAU - # of Claims	0	0	0	0	0	1	0	1	0	1	0	0	0	1	0	0	1	0	0	0	0	0	1		0.333333
		DAU - Amount Paid	0	0	0	0	0	103.5	0	450	0	65	0	0	0	800	0	0	207	0	0	0	0	0	650		216.667
		DAU - Indexed Amount	0	0	0	0	0	174.631	0	711.855	0	95.479	0	0	0	984.789	0	0	235.724	0	0	0	0	0	627.042		209.014
DAU L-14		GMUs: 59, 591, 511, 512	1979	1980	1981	1982	1983	1984	1985	1986	1987	1988	1989	1990	1991	1992	1993	1994	1995	1996	1997	1998	1999	2000	2001		3-Yr AVG
Sheep		# of Claims Paid	0	0	0	0	0	0	0	0	0	0	1	0	1	1	0		0	0	0	0	0	0	0		0
		# of Sheep	0	0	0	0	0	0	0	0	0	0	2	0	2	7	0		0	0	0	0	0	0	0		0
		Amount Paid	0	0	0	0	0	0	0	0	0	0	225	0	70	420	0		0	0	0	0	0	0	0		0
		Indexed Amount	0	0	0	0	0	0	0	0	0	0	315.65	0	89.1187	517.014	0	0	0	0	0	0	0	0	0		0
Cattle		# of Claims Paid	0	0	0	0	0	0	0	0	0	0	0	0	0	0	0		0	0	0	0	0	0	0		0
		# of Cattle	0	0	0	0	0	0	0	0	0	0	0	0	0	0	0		0	0	0	0	0	0	0		0
		Amount Paid	0	0	0	0	0	0	0	0	0	0	0	0	0	0	0		0	0	0	0	0	0	0		0
		Indexed Amount	0	0	0	0	0	0	0	0	0	0	0	0	0	0	0	0	0	0	0	0	0	0	0		0
Other Stock		# of Claims Paid	0	0	0	0	0	0	0	0	0	0	0	0	1	0	0		0	1	0	1	1	0	0		0.333333
		# of Animals	0	0	0	0	0	0	0	0	0	0	0	0	1	0	0		0	1	0	1	1	0	0		0.333333
		Amount Paid	0	0	0	0	0	0	0	0	0	0	0	0	367.5	0	0		0	400	0	41.2	1500	0	0		500
		Indexed Amount	0	0	0	0	0	0	0	0	0	0	0	0	467.873	0	0	0	0	443.655	0	43.8063	1552.4	0	0		517.466
		DAU - # of Claims	0	0	0	0	0	0	0	0	0	0	1	0	2	1	0	0	0	1	0	1	1	0	0		0.333333
		DAU - Amount Paid	0	0	0	0	0	0	0	0	0	0	225	0	437.5	420	0	0	0	400	0	41.2	1500	0	0		500
		DAU - Indexed Amount	0	0	0	0	0	0	0	0	0	0	315.65	0	556.992	517.014	0	0	0	443.655	0	43.8063	1552.4	0	0		517.466
DAU L-15		GMUs: 57, 58, 581	1979	1980	1981	1982	1983	1984	1985	1986	1987	1988	1989	1990	1991	1992	1993	1994	1995	1996	1997	1998	1999	2000	2001		3-Yr AVG
Sheep		# of Claims Paid	0	0	0	0	0	0	0	0	0	0	0	0	0	1	0		0	0	0	0	0	0	0		0
		# of Sheep	0	0	0	0	0	0	0	0	0	0	0	0	0	1	0		0	0	0	0	0	0	0		0
		Amount Paid	0	0	0	0	0	0	0	0	0	0	0	0	0	66	0		0	0	0	0	0	0	0		0
		Indexed Amount	0	0	0	0	0	0	0	0	0	0	0	0	0	81.2451	0	0	0	0	0	0	0	0	0		0
Cattle		# of Claims Paid	0	0	0	0	0	0	0	0	1	0	0	0	1	1	0		0	0	0	0	1	0	0		0.333333
		# of Cattle	0	0	0	0	0	0	0	0	1	0	0	0	1	3	0		0	0	0	0	1	0	0		0.333333
		Amount Paid	0	0	0	0	0	0	0	0	511	0	0	0	697.5	1200	0		0	0	0	0	50	0	0		16.6667
		Indexed Amount	0	0	0	0	0	0	0	0	781.477	0	0	0	888.004	1477.18	0	0	0	0	0	0	51.7466	0	0		17.2489
Other Stock		# of Claims Paid	0	0	0	0	0	0	0	0	0	0	0	0	3	0	0		0	0	0	0	0	0	1		0.333333
		# of Animals	0	0	0	0	0	0	0	0	0	0	0	0	3	0	0		0	0	0	0	0	0	2		0.666667
		Amount Paid	0	0	0	0	0	0	0	0	0	0	0	0	911.64	0	0		0	0	0	0	0	0	1150		383.333
		Indexed Amount	0	0	0	0	0	0	0	0	0	0	0	0	1160.63	0	0	0	0	0	0	0	0	0	1109.38		369.794
		DAU - # of Claims	0	0	0	0	0	0	0	0	1	0	0	0	4	2	0	0	0	0	0	0	1	0	1		0.666667
		DAU - Amount Paid	0	0	0	0	0	0	0	0	511	0	0	0	1609.14	1266	0	0	0	0	0	0	50	0	1150		400
		DAU - Indexed Amount	0	0	0	0	0	0	0	0	781.477	0	0	0	2048.64	1558.43	0	0	0	0	0	0	51.7466	0	1109.38		387.043
DAU L-16		GMUs: 69, 691, 82, 84, 86, 861	1979	1980	1981	1982	1983	1984	1985	1986	1987	1988	1989	1990	1991	1992	1993	1994	1995	1996	1997	1998	1999	2000	2001		3-Yr AVG
Sheep		# of Claims Paid	0	0	0	0	0	0	0	0	0	1	1	0	2	1	0		0	0	0	0	0	1	2		1
		# of Sheep	0	0	0	0	0	0	0	0	0	2	8	0	4	1	0		0	0	0	0	0	1	3		1.33333
		Amount Paid	0	0	0	0	0	0	0	0	0	250	880	0	290	45	0		0	0	0	0	0	50	270		106.667
		Indexed Amount	0	0	0	0	0	0	0	0	0	367.227	1234.54	0	369.206	55.3944	0	0	0	0	0	0	0	50	260.464		103.488
Cattle		# of Claims Paid	0	0	0	0	0	0	1	0	0	0	0	0	1	2	0		1	0	0	1	0	0	2		0.666667
		# of Cattle	0	0	0	0	0	0	1	0	0	0	0	0	1	3	0		1	0	0	1	0	0	3		1
		Amount Paid	0	0	0	0	0	0	125	0	0	0	0	0	515	825	0		1000	0	0	150	0	0	920		306.667
		Indexed Amount	0	0	0	0	0	0	202.315	0	0	0	0	0	655.659	1015.56	0	0	1138.76	0	0	159.489	0	0	887.506		295.835
Other Stock		# of Claims Paid	0	0	0	1	1	1	1	1	1	0	1	1	2	3	0		1	4	0	4	2	2	2		2
		# of Animals	0	0	0	1	2	1	1	9	4	0	2	2	2	3	0		1	11	0	5	10	2	2		4.66667
		Amount Paid	0	0	0	1000	360	93	100	65	120	0	250	200	1040	1975	0		240.1	5185	0	1350.73	382	374	220		325.333
		Indexed Amount	0	0	0	1794.66	635.636	156.915	161.852	102.824	183.517	0	350.722	265.856	1324.05	2431.2	0	0	273.417	5750.88	0	1436.18	395.344	374	212.23		327.191
		DAU - # of Claims	0	0	0	1	1	1	2	1	1	1	2	1	5	6	0	0	2	4	0	5	2	3	6		3.66667
		DAU - Amount Paid	0	0	0	1000	360	93	225	65	120	250	1130	200	1845	2845	0	0	1240.1	5185	0	1500.73	382	424	1410		738.667
		DAU - Indexed Amount	0	0	0	1794.66	635.636	156.915	364.167	102.824	183.517	367.227	1585.26	265.856	2348.91	3502.15	0	0	1412.18	5750.88	0	1595.67	395.344	424	1360.2		726.514
DAU L-17		GMUs: 128, 129, 130, 133, 134, 135, 136, 141, 142, 147	1979	1980	1981	1982	1983	1984	1985	1986	1987	1988	1989	1990	1991	1992	1993	1994	1995	1996	1997	1998	1999	2000	2001		3-Yr AVG
Sheep		# of Claims Paid	0	0	0	0	0	0	0	0	0	0	0	0	0	0	0		0	0	0	0	0	0	0		0
		# of Sheep	0	0	0	0	0	0	0	0	0	0	0	0	0	0	0		0	0	0	0	0	0	0		0
		Amount Paid	0	0	0	0	0	0	0	0	0	0	0	0	0	0	0		0	0	0	0	0	0	0		0
		Indexed Amount	0	0	0	0	0	0	0	0	0	0	0	0	0	0	0	0	0	0	0	0	0	0	0		0
Cattle		# of Claims Paid	0	0	0	0	0	0	0	0	0	0	0	0	0	0	0		0	0	3	0	0	0	1		0.333333
		# of Cattle	0	0	0	0	0	0	0	0	0	0	0	0	0	0	0		0	0	5	0	0	0	3		1
		Amount Paid	0	0	0	0	0	0	0	0	0	0	0	0	0	0	0		0	0	1895	0	0	0	720		240
		Indexed Amount	0	0	0	0	0	0	0	0	0	0	0	0	0	0	0	0	0	0	2052.33	0	0	0	694.57		231.523
Other Stock		# of Claims Paid	0	0	0	0	0	0	0	0	0	0	1	0	0	0	0		0	0	0	1	0	0	0		0
		# of Animals	0	0	0	0	0	0	0	0	0	0	1	0	0	0	0		0	0	0	1	0	0	0		0
		Amount Paid	0	0	0	0	0	0	0	0	0	0	50	0	0	0	0		0	0	0	5000	0	0	0		0
		Indexed Amount	0	0	0	0	0	0	0	0	0	0	70.1445	0	0	0	0	0	0	0	0	5316.3	0	0	0		0
		DAU - # of Claims	0	0	0	0	0	0	0	0	0	0	1	0	0	0	0	0	0	0	3	1	0	0	1		0.333333
		DAU - Amount Paid	0	0	0	0	0	0	0	0	0	0	50	0	0	0	0	0	0	0	1895	5000	0	0	720		240
		DAU - Indexed Amount	0	0	0	0	0	0	0	0	0	0	70.1445	0	0	0	0	0	0	0	2052.33	5316.3	0	0	694.57		231.523
DAU L-18		GMUs: 137, 143, 144	1979	1980	1981	1982	1983	1984	1985	1986	1987	1988	1989	1990	1991	1992	1993	1994	1995	1996	1997	1998	1999	2000	2001		3-Yr AVG
Sheep		# of Claims Paid	0	0	0	0	0	0	0	0	0	0	0	0	0	0	0		0	0	0	0	0	0	0		0
		# of Sheep	0	0	0	0	0	0	0	0	0	0	0	0	0	0	0		0	0	0	0	0	0	0		0
		Amount Paid	0	0	0	0	0	0	0	0	0	0	0	0	0	0	0		0	0	0	0	0	0	0		0
		Indexed Amount	0	0	0	0	0	0	0	0	0	0	0	0	0	0	0	0	0	0	0	0	0	0	0		0
Cattle		# of Claims Paid	0	0	0	0	0	0	0	0	0	0	0	0	0	0	0		0	0	1	2	0	0	0		0
		# of Cattle	0	0	0	0	0	0	0	0	0	0	0	0	0	0	0		0	0	1	2	0	0	0		0
		Amount Paid	0	0	0	0	0	0	0	0	0	0	0	0	0	0	0		0	0	1000	670.23	0	0	0		0
		Indexed Amount	0	0	0	0	0	0	0	0	0	0	0	0	0	0	0	0	0	0	1083.02	712.629	0	0	0		0
Other Stock		# of Claims Paid	0	0	0	0	0	0	0	0	0	0	0	0	0	0	0		0	0	0	0	0	1	0		0.333333
		# of Animals	0	0	0	0	0	0	0	0	0	0	0	0	0	0	0		0	0	0	0	0	1	0		0.333333
		Amount Paid	0	0	0	0	0	0	0	0	0	0	0	0	0	0	0		0	0	0	0	0	3800	0		1266.67
		Indexed Amount	0	0	0	0	0	0	0	0	0	0	0	0	0	0	0	0	0	0	0	0	0	3800	0		1266.67
		DAU - # of Claims	0	0	0	0	0	0	0	0	0	0	0	0	0	0	0	0	0	0	1	2	0	1	0		0.333333
		DAU - Amount Paid	0	0	0	0	0	0	0	0	0	0	0	0	0	0	0	0	0	0	1000	670.23	0	3800	0		1266.67
		DAU - Indexed Amount	0	0	0	0	0	0	0	0	0	0	0	0	0	0	0	0	0	0	1083.02	712.629	0	3800	0		1266.67
DAU L-19		GMUs: 83, 85, 851, 140	1979	1980	1981	1982	1983	1984	1985	1986	1987	1988	1989	1990	1991	1992	1993	1994	1995	1996	1997	1998	1999	2000	2001		3-Yr AVG
Sheep		# of Claims Paid	0	0	0	0	0	0	0	1	0	1	2	2	0	0	1		0	0	0	2	1	0	0		0.333333
		# of Sheep	0	0	0	0	0	0	0	2	0	2	8	4	0	0	11		0	0	0	6	1	0	0		0.333333
		Amount Paid	0	0	0	0	0	0	0	174	0	152	710	450	0	0	500		0	0	0	485	90	0	0		30
		Indexed Amount	0	0	0	0	0	0	0	275.251	0	223.274	996.051	598.175	0	0	597.811	0	0	0	0	515.681	93.1439	0	0		31.048
Cattle		# of Claims Paid	0	2	0	0	0	3	1	1	2	0	0	2	2	2	0		1	0	0	0	0	0	0		0
		# of Cattle	0	2	0	0	0	4	1	1	2	0	0	4	4	5	0		1	0	0	0	0	0	0		0
		Amount Paid	0	850	0	0	0	1010	375	393.25	525	0	0	850	1025	1873.52	0		325	0	0	0	0	0	0		0
		Indexed Amount	0	1783.67	0	0	0	1704.13	606.944	622.082	802.887	0	0	1129.89	1304.95	2306.28	0	0	370.098	0	0	0	0	0	0		0
Other Stock		# of Claims Paid	0	0	0	2	1	0	1	0	1	1	0	3	2	1	1		2	0	1	1	1	1	1		1
		# of Animals	0	0	0	12	11	0	1	0	1	1	0	4	3	4	27		2	0	1	1	1	1	1		1
		Amount Paid	0	0	0	905	1700	0	159.25	0	650	375	0	1225.4	350	480	150		1106	0	400	2000	2000	90	1700		1263.33
		Indexed Amount	0	0	0	1624.17	3001.62	0	257.749	0	994.051	550.84	0	1628.9	445.594	590.873	179.343	0	1259.47	0	433.209	2126.52	2069.86	90	1639.96		1266.61
		DAU - # of Claims	0	2	0	2	1	3	2	2	3	2	2	7	4	3	2	0	3	0	1	3	2	1	1		1.33333
		DAU - Amount Paid	0	850	0	905	1700	1010	534.25	567.25	1175	527	710	2525.4	1375	2353.52	650	0	1431	0	400	2485	2090	90	1700		1293.33
		DAU - Indexed Amount	0	1783.67	0	1624.17	3001.62	1704.13	864.694	897.333	1796.94	774.114	996.051	3356.96	1750.55	2897.15	777.155	0	1629.57	0	433.209	2642.2	2163.01	90	1639.96		1297.65
DAU L-20		GMUs: 68, 681, 76, 79, 80, 81	1979	1980	1981	1982	1983	1984	1985	1986	1987	1988	1989	1990	1991	1992	1993	1994	1995	1996	1997	1998	1999	2000	2001		3-Yr AVG
Sheep		# of Claims Paid	0	0	0	0	0	0	0	0	0	0	0	0	0	0	0		0	3	2	0	0	0	0		0
		# of Sheep	0	0	0	0	0	0	0	0	0	0	0	0	0	0	0		0	5	17	0	0	0	0		0
		Amount Paid	0	0	0	0	0	0	0	0	0	0	0	0	0	0	0		0	507	1836.25	0	0	0	0		0
		Indexed Amount	0	0	0	0	0	0	0	0	0	0	0	0	0	0	0	0	0	562.332	1988.7	0	0	0	0		0
Cattle		# of Claims Paid	1	0	0	0	0	0	0	0	0	0	0	0	1	0	1		0	0	0	0	0	0	0		0
		# of Cattle	1	0	0	0	0	0	0	0	0	0	0	0	1	0	2		0	0	0	0	0	0	0		0
		Amount Paid	225	0	0	0	0	0	0	0	0	0	0	0	413	0	400		0	0	0	0	0	0	0		0
		Indexed Amount	541.736	0	0	0	0	0	0	0	0	0	0	0	525.8	0	478.249	0	0	0	0	0	0	0	0		0
Other Stock		# of Claims Paid	0	0	0	0	0	0	0	0	0	0	0	0	0	1	0		0	1	0	0	0	0	0		0
		# of Animals	0	0	0	0	0	0	0	0	0	0	0	0	0	2	0		0	1	0	0	0	0	0		0
		Amount Paid	0	0	0	0	0	0	0	0	0	0	0	0	0	125	0		0	50	0	0	0	0	0		0
		Indexed Amount	0	0	0	0	0	0	0	0	0	0	0	0	0	153.873	0	0	0	55.4569	0	0	0	0	0		0
		DAU - # of Claims	1	0	0	0	0	0	0	0	0	0	0	0	1	1	1	0	0	4	2	0	0	0	0		0
		DAU - Amount Paid	225	0	0	0	0	0	0	0	0	0	0	0	413	125	400	0	0	557	1836.25	0	0	0	0		0
		DAU - Indexed Amount	541.736	0	0	0	0	0	0	0	0	0	0	0	525.8	153.873	478.249	0	0	617.789	1988.7	0	0	0	0		0
DAU L-21		GMUs: 54, 55, 551, 65, 66, 67	1979	1980	1981	1982	1983	1984	1985	1986	1987	1988	1989	1990	1991	1992	1993	1994	1995	1996	1997	1998	1999	2000	2001		3-Yr AVG
Sheep		# of Claims Paid	0	0	0	0	0	1	4	0	5	0	2	1	2	0	1		0	2	2	0	3	0	0		1
		# of Sheep	0	0	0	0	0	25	23	0	35	0	6	11	14		2		0	16	15	0	26	0	0		8.66667
		Amount Paid	0	0	0	0	0	1820	2123	0	2847.66	0	625	739	700	0	138.2		0	1330	1425	0	1762	0	0		587.333
		Indexed Amount	0	0	0	0	0	3070.81	3436.11	0	4354.95	0	876.806	982.336	891.187	0	165.235	0	0	1475.15	1543.31	0	1823.55	0	0		607.85
Cattle		# of Claims Paid	0	0	0	0	0	0	0	0	0	0	0	0	0	0	0		0	0	2	0	0	0	0		0
		# of Cattle	0	0	0	0	0	0	0	0	0	0	0	0	0	0	0		0	0	2	0	0	0	0		0
		Amount Paid	0	0	0	0	0	0	0	0	0	0	0	0	0	0	0		0	0	1325	0	0	0	0		0
		Indexed Amount	0	0	0	0	0	0	0	0	0	0	0	0	0	0	0	0	0	0	1435.01	0	0	0	0		0
Other Stock		# of Claims Paid	0	0	0	0	0	1	1	0	0	0	0	0	0	0	1		0	0	1	1	0	0	0		0
		# of Animals	0	0	0	0	0	1	4	0	0	0	0	0	0	0	1		0	0	4	3	0	0	0		0
		Amount Paid	0	0	0	0	0	2500	475	0	0	0	0	0	0	0	3500		0	0	665	253	0	0	0		0
		Indexed Amount	0	0	0	0	0	4218.15	768.796	0	0	0	0	0	0	0	4184.68	0	0	0	720.211	269.005	0	0	0		0
		DAU - # of Claims	0	0	0	0	0	2	5	0	5	0	2	1	2	0	2	0	0	2	5	1	3	0	0		1
		DAU - Amount Paid	0	0	0	0	0	4320	2598	0	2847.66	0	625	739	700	0	3638.2	0	0	1330	3415	253	1762	0	0		587.333
		DAU - Indexed Amount	0	0	0	0	0	7288.96	4204.91	0	4354.95	0	876.806	982.336	891.187	0	4349.91	0	0	1475.15	3698.53	269.005	1823.55	0	0		607.85
DAU L-22		GMUs: 40, 60, 61, 62	1979	1980	1981	1982	1983	1984	1985	1986	1987	1988	1989	1990	1991	1992	1993	1994	1995	1996	1997	1998	1999	2000	2001		3-Yr AVG
Sheep		# of Claims Paid	0	4	1	0	1	4	0	5	9	6	4	6	4	4	5		0	6	10	5	6	4	0		3.33333
		# of Sheep	0	46	7	0	13	27	0	92	100	47	79	66	83	55	39		0	16	39	31	38	53	0		30.3333
		Amount Paid	0	3475	436.35	0	910	1600	0	7172.24	8312.5	4243	5691	4419	4862.5	4988	2517.33		0	2055.48	4700	3775	3205	5586.35	0		2930.45
		Indexed Amount	0	7292.08	829.967	0	1606.75	2699.61	0	11345.8	12712.4	6232.57	7983.84	5874.08	6190.57	6140.16	3009.78	0	0	2279.81	5090.21	4013.81	3316.96	5586.35	0		2967.77
Cattle		# of Claims Paid	0	0	0	0	0	0	0	0	0	0	0	0	0	0	1		1	0	0	0	1	0	0		0.333333
		# of Cattle	0	0	0	0	0	0	0	0	0	0	0	0	0	0	1		1	0	0	0	1	0	0		0.333333
		Amount Paid	0	0	0	0	0	0	0	0	0	0	0	0	0	0	343		333.82	0	0	0	550	0	0		183.333
		Indexed Amount	0	0	0	0	0	0	0	0	0	0	0	0	0	0	410.098	0	380.142	0	0	0	569.213	0	0		189.738
Other Stock		# of Claims Paid	0	0	0	0	0	0	0	0	0	0	1	1	0	1	1		0	0	0	0	1	2	2		1.66667
		# of Animals	0	0	0	0	0	0	0	0	0	0	2	1	0	1	2		0	0	0	0	1	2	4		2.33333
		Amount Paid	0	0	0	0	0	0	0	0	0	0	70	65	0	3625	190		0	0	0	0	750.7	3200	5299.99		3083.56
		Indexed Amount	0	0	0	0	0	0	0	0	0	0	98.2022	86.403	0	4462.32	227.168	0	0	0	0	0	776.923	3200	5112.79		3029.91
		DAU - # of Claims	0	4	1	0	1	4	0	5	9	6	5	7	4	5	7	0	1	6	10	5	8	6	2		5.33333
		DAU - Amount Paid	0	3475	436.35	0	910	1600	0	7172.24	8312.5	4243	5761	4484	4862.5	8613	3050.33	0	333.82	2055.48	4700	3775	4505.7	8786.35	5299.99		6197.35
		DAU - Indexed Amount	0	7292.08	829.967	0	1606.75	2699.61	0	11345.8	12712.4	6232.57	8082.04	5960.48	6190.57	10602.5	3647.04	0	380.142	2279.81	5090.21	4013.81	4663.09	8786.35	5112.79		6187.41
DAU L-23		GMUs: 70, 71, 711	1979	1980	1981	1982	1983	1984	1985	1986	1987	1988	1989	1990	1991	1992	1993	1994	1995	1996	1997	1998	1999	2000	2001		3-Yr AVG
Sheep		# of Claims Paid	0	1	1	1	0	0	1	1	2	0	1	1	1	2	1		0	1	0	1	0	1	0		0.333333
		# of Sheep	0	1	7	1	0	0	4	3	8	0	1	3	2	20	6		0	6	0	8	0	8	0		2.66667
		Amount Paid	0	60	330	51	0	0	365	230	611	0	100	250	96.5	999.79	342		0	546	0	800	0	640	0		213.333
		Indexed Amount	0	125.906	627.682	91.5277	0	0	590.759	363.837	934.408	0	140.289	332.319	122.857	1230.73	408.903	0	0	605.589	0	850.608	0	640	0		213.333
Cattle		# of Claims Paid	0	0	0	0	0	0	0	0	0	0	1	0	0	0	0		0	0	0	0	0	0	0		0
		# of Cattle	0	0	0	0	0	0	0	0	0	0	1	0	0	0	0		0	0	0	0	0	0	0		0
		Amount Paid	0	0	0	0	0	0	0	0	0	0	250	0	0	0	0		0	0	0	0	0	0	0		0
		Indexed Amount	0	0	0	0	0	0	0	0	0	0	350.722	0	0	0	0	0	0	0	0	0	0	0	0		0
Other Stock		# of Claims Paid	0	0	0	0	0	0	0	0	0	0	0	1	0	0	2		0	1	0	0	0	0	0		0
		# of Animals	0	0	0	0	0	0	0	0	0	0	0	2	0	0	2		0	1	0	0	0	0	0		0
		Amount Paid	0	0	0	0	0	0	0	0	0	0	0	3500	0	0	629		0	5000	0	0	0	0	0		0
		Indexed Amount	0	0	0	0	0	0	0	0	0	0	0	4652.47	0	0	752.047	0	0	5545.69	0	0	0	0	0		0
		DAU - # of Claims	0	1	1	1	0	0	1	1	2	0	2	2	1	2	3	0	0	2	0	1	0	1	0		0.333333
		DAU - Amount Paid	0	60	330	51	0	0	365	230	611	0	350	3750	96.5	999.79	971	0	0	5546	0	800	0	640	0		213.333
		DAU - Indexed Amount	0	125.906	627.682	91.5277	0	0	590.759	363.837	934.408	0	491.011	4984.79	122.857	1230.73	1160.95	0	0	6151.27	0	850.608	0	640	0		213.333
DAU L-24		GMUs: 72, 73	1979	1980	1981	1982	1983	1984	1985	1986	1987	1988	1989	1990	1991	1992	1993	1994	1995	1996	1997	1998	1999	2000	2001		3-Yr AVG
Sheep		# of Claims Paid	0	0	0	0	0	1	1	0	1	6	4	2	4	13	6		9	2	2	0	6	4	2		4
		# of Sheep	0	0	0	0	0	5	8	0	2	24	24	7	40	69	21		37	13	3	0	37	18	2		19
		Amount Paid	0	0	0	0	0	315	480	0	150	2085	1871	581	2164	3444	1927		3802.81	1287	475	0	3434	1745	168		1782.33
		Indexed Amount	0	0	0	0	0	531.486	776.889	0	229.396	3062.67	2624.81	772.31	2755.04	4239.52	2303.96	0	4330.5	1427.46	514.436	0	3553.96	1745	162.066		1820.34
Cattle		# of Claims Paid	0	0	0	0	0	1	0	0	0	1	1	0	1	0	1		0	0	1	0	1	0	0		0.333333
		# of Cattle	0	0	0	0	0	1	0	0	0	2	1	0	1	0	1		0	0	1	0	1	0	0		0.333333
		Amount Paid	0	0	0	0	0	100	0	0	0	800	360	0	1000	0	528.08		0	0	299.54	0	700	0	0		233.333
		Indexed Amount	0	0	0	0	0	168.726	0	0	0	1175.13	505.04	0	1273.12	0	631.384	0	0	0	324.409	0	724.452	0	0		241.484
Other Stock		# of Claims Paid	0	0	0	0	0	0	0	0	0	0	0	1	0	1	3		2	1	0	2	7	7	0		4.66667
		# of Animals	0	0	0	0	0	0	0	0	0	0	0	1	0	1	3		8	3	0	2	11	26	0		12.3333
		Amount Paid	0	0	0	0	0	0	0	0	0	0	0	1700	0	100	6110.9		395	990	0	3600	12564.7	874.5	0		4479.73
		Indexed Amount	0	0	0	0	0	0	0	0	0	0	0	2259.77	0	123.099	7306.33	0	449.811	1098.05	0	3827.74	13003.6	874.5	0		4626.03
		DAU - # of Claims	0	0	0	0	0	2	1	0	1	7	5	3	5	14	10	0	11	3	3	2	14	11	2		9
		DAU - Amount Paid	0	0	0	0	0	415	480	0	150	2885	2231	2281	3164	3544	8565.98	0	4197.81	2277	774.54	3600	16698.7	2619.5	168		6495.39
		DAU - Indexed Amount	0	0	0	0	0	700.212	776.889	0	229.396	4237.8	3129.85	3032.08	4028.17	4362.61	10241.7	0	4780.31	2525.51	838.845	3827.74	17282	2619.5	162.066		6687.85
DAU L-25		GMUs: 74, 741, 75, 751, 77, 771, 78	1979	1980	1981	1982	1983	1984	1985	1986	1987	1988	1989	1990	1991	1992	1993	1994	1995	1996	1997	1998	1999	2000	2001		3-Yr AVG
Sheep		# of Claims Paid	1	0	0	1	2	0	1	1	0	9	6	2	5	5	2		3	4	3	7	8	8	2		6
		# of Sheep	4	0	0	32	6	0	31	13	0	51	36	18	26	29	5		25	122	4	22	63	14	4		27
		Amount Paid	450	0	0	550	370	0	2480	923.6	0	5570.84	3143	1508	1224.1	2858.1	300		2395	10222.5	521	2390	6268.37	1355	304.5		2642.62
		Indexed Amount	1083.47	0	0	987.064	653.293	0	4013.93	1461.04	0	8183.05	4409.28	2004.55	1558.43	3518.28	358.687	0	2727.34	11338.2	564.255	2541.19	6487.34	1355	293.745		2712.03
Cattle		# of Claims Paid	0	0	0	0	0	0	0	0	0	0	0	0	3	0	0		0	0	1	2	0	1	3		1.33333
		# of Cattle	0	0	0	0	0	0	0	0	0	0	0	0	3	0	0		0	0	1	5	0	1	3		1.33333
		Amount Paid	0	0	0	0	0	0	0	0	0	0	0	0	1600	0	0		0	0	900	1330	0	250	1152		467.333
		Indexed Amount	0	0	0	0	0	0	0	0	0	0	0	0	2037	0	0	0	0	0	974.721	1414.14	0	250	1111.31		453.77
Other Stock		# of Claims Paid	0	0	0	0	1	0	0	0	0	0	1	0	1	4	1		1	4	1	1	3	9	3		5
		# of Animals	0	0	0	0	1	0	0	0	0	0	1	0	1	4	1		5	7	1	6	7	16	56		26.3333
		Amount Paid	0	0	0	0	1500	0	0	0	0	0	250	0	950	13700	99.8		550	5740	200	285	765	114196	3185		39382.1
		Indexed Amount	0	0	0	0	2648.48	0	0	0	0	0	350.722	0	1209.47	16864.5	119.323	0	626.319	6366.45	216.605	303.029	791.723	114196	3072.51		39353.5
		DAU - # of Claims	1	0	0	1	3	0	1	1	0	9	7	2	9	9	3	0	4	8	5	10	11	18	8		12.3333
		DAU - Amount Paid	450	0	0	550	1870	0	2480	923.6	0	5570.84	3393	1508	3774.1	16558.1	399.8	0	2945	15962.5	1621	4005	7033.37	115801	4641.5		42492.1
		DAU - Indexed Amount	1083.47	0	0	987.064	3301.78	0	4013.93	1461.04	0	8183.05	4760	2004.55	4804.9	20382.8	478.01	0	3353.65	17704.6	1755.58	4258.36	7279.06	115801	4477.56		42519.3
STATEWIDE SUMMARY			1979	1980	1981	1982	1983	1984	1985	1986	1987	1988	1989	1990	1991	1992	1993	1994	1995	1996	1997	1998	1999	2000	2001		3-Yr AVG
Sheep		# of Claims Paid	5	9	11	17	12	9	13	17	33	37	39	33	42	63	53	56	56	52	52	41	40	35	22		32.3333
		# of Sheep	54	242	118	306	88	94	137	181	327	642	691	446	437	743	967	931.25	979	1036	1053	612	472	505	360		445.667
		Amount Paid	3859.76	8741.75	6806.6	13733.1	6755.6	5871.44	10582.6	13738.9	30334.6	52629.7	54177.1	31909.4	25891	48592.2	74321.3	80551.6	96378.7	102914	123806	60841.1	42890.2	49873.4	33020.7		41928.1
		Indexed Amount	9293.2	18344	12946.6	24646.2	11928.1	9906.64	17128.1	21733.6	46390.9	77308.1	76004.5	42416.4	32962.5	59816.4	88860.2	94120.5	109752	114146	134085	64689.9	44388.4	49873.4	31854.4		42038.7
Cattle		# of Claims Paid	1	3	0	1	0	5	2	1	3	1	3	3	15	6	5	4	5	0	10	9	5	6	10		7
		# of Cattle	1	4	0	1	0	6	2	1	3	2	4	5	20	12	7	6.25	6	0	13	24	8	6	13		9
		Amount Paid	225	1450	0	125	0	1489	500	393.25	1036	800	1190	1550	9970.77	4398.52	2440.58	2231.98	2088.82	0	6896.54	9190.23	3065.84	2962.41	5253.03		3760.43
		Indexed Amount	541.736	3042.74	0	224.333	0	2512.33	809.259	622.082	1584.36	1175.13	1669.44	2060.38	12694	5414.52	2918.01	2607.96	2378.67	0	7469.12	9771.61	3172.94	2962.41	5067.49		3734.28
Other Stock		# of Claims Paid	0	0	1	4	7	3	3	2	3	4	6	9	13	15	15	16.75	16	21	7	20	23	32	15		23.3333
		# of Animals	0	0	1	14	33	3	6	10	6	13	9	14	22	24	344	109.5	33	37	111	37	52	74	76		67.3333
		Amount Paid	0	0	1000	1955	7520	2696.5	734.25	515	854.2	2240	11925	7611.4	11119.1	21539	14959.7	18282.8	11592.8	25039.7	4841.8	28777.9	23498.7	157895	33862.5		71752.1
		Indexed Amount	0	0	1902.07	3508.56	13277.7	4549.69	1188.4	814.679	1306.34	3290.35	16729.5	10117.7	14156.1	26514.2	17886.2	21362.5	13201.4	27772.5	5243.78	30598.4	24319.5	157895	32666.5		71627
		TOTAL - # of Claims	6	12	12	22	19	17	18	20	39	42	48	45	70	84	73	76.75	77	73	69	70	68	73	47		62.6667
		TOTAL - Amount Paid	4084.76	10191.8	7806.6	15813.1	14275.6	10056.9	11816.9	14647.2	32224.8	55669.7	67292.1	41070.8	46980.9	74529.8	91721.6	101066	110060	127954	135544	98809.3	69454.7	210731	72136.2		117441
		TOTAL - Indexed Amount	9834.93	21386.8	14848.7	28379.1	25205.8	16968.7	19125.8	23170.4	49281.6	81773.6	94403.4	54594.5	59812.5	91745.1	109664	118091	125332	141919	146798	105060	71880.9	210731	69588.3		117400
																		* No data for 1994 currently available. Statewide figure is derived by averaging '92, '93, '95 & '96 figures.
[truncated: 6 more columns]
