# Supplementary material for: The Elephant in the room: What can we learn from California regarding the use of sport hunting of pumas (Puma concolor) as a management tool?
Source: PLoS One. 2020 Feb 13;15(2):e0224638. doi: 10.1371/journal.pone.0224638 (PMC7018503; doi:10.1371/journal.pone.0224638)
Supplement: S2 File — This is a zip file that contains sources of the data used in the analyses that are no longer available on the internet. (ZIP) [file pone.0224638.s003.zip › Oregon sheep and lambs data.xls]

## Sheet: Sheep & lamb inventory
Sheep and Lamb Inventory: Total Sheep, Breeding, and Lamb Crop 1/
Year	Total Breeding	1 Year & Older 2/		Replacement Lambs	Lambs per 100 Ewes 1+	Total Lamb Crop
		Ewes	Rams
	1,000 Head				Percent	1,000 Head
1920	2225	1580	73
1921	2125	1530	65
1922	1926	1445	50
1923	1838	1420	50
1924	1899	1437	52			1310
1925	1989	1500	55			1245
1926	2065	1520	57			1398
1927	2182	1605	58			1364
1928	2329	1696	66			1611
1929	2461	1816	69			1453
1930	2530	1961	74			1765
1931	2624	2039	76			1877
1932	2510	2000	72			1620
1933	2375	1866	66			1513
1934	2425	1868	67			1700
1935	2300	1725	63			1449
1936	2070	1655	61			1390
1937	2025	1600	59			1264
1938	1817	1452	52			1350
1939	1793	1432	50			1274
1940	1610	1320	45			1228
1941	1626	1307	45			1294
1942	1577	1216	48			1070
1943	1419	1131	45			905
1944	1192	1007	42			896
1945	1037	886	38			789
1946	861	744	30			699
1947	758	662	26			636
1948	713	602	21			596
1949	706	584	21			526
1950	671	566	21			532
1951	657	560	20			554
1952	723	577	20			577
1953	745	623	24			617
1954	790	660	25			667
1955	822	693	25			693
1956	822	700	25			686
1957	830	700	25			693
1958	847	714	25			707
1959	881	728	26			721
1960	863	699	28			685
1961	846	699	29			692
1962	778	636	25			630
1963	724	591	26			603
1964	673	550	24			550
1965	626	512	26		98	502
1966	582	466	25		101	470
1967	524	425	23		102	434
1968	498	408	19		101	412
1969	483	396	18		95	376
1970	460	369	16		101	373
1971	430	349	16		105	366
1972	426	345	16		105	362
1973	385	315	14		111	350
1974	395	325	14		110	358
1975	370	302	13		109	329
1976	330	268	12		119	319
1977	310	247	11		113	279
1978	325	262	11		111	290
1979	380	282	12		106	300
1980	385	280	12		109	305
1981	420	310	15		116	360
1982	440	350	17		109	380
1983	400	322	14		103	333
1984	350	292	12		108	315
1985	345	285	12		112	320
1986	325	275	11		106	290
1987	350	285	11		105	320
1988	390	320	13		100	320
1989	350	280	14		111	310
1990	345	279	14		115	320
1991	360	285	15		112	320
1992	352	280	15		107	300
1993	320	250	20		108	270
1994	300	240	17	43	98	235
1995	275	220	15	40	100	220
1996	253	205	13	35	102	210
1997	224	180	9	35	108	195
1998	185	150	7	28	109	163
1999	150	120	6	24	125	150
2000	151	121	6	24	124	150
2001	151	120	7	24	133	160
2002	171	134	8	29	112	150
2003	162	130	7	25	104	135
2004	143	112	7	24	128	143
2005	151	120	7	24	142	170
2006	149	121	6	22	119	144
2007	147	118	7	22	130	153
2008	149	120	7	22	131	157
2009	150	121	7	22	129	156
2010	154	121	8	25
1/: Missing data were not published and/or surveyed in this form to avoid disclosure of individual operations.
2/: Breeders.

## Sheet: Sheep and lamb by class
Sheep and Lamb: Inventory by Class 1/
Year	All Sheep and Lambs	Total Breeding	Total Marketing	Ewes	Rams	Replacement Lambs	Total Breeding Sheep & Lambs
	1,000 Head
1994			120
1995			90
1996			100
1997			95
1998			100
1999	215	150	65	120	6	24	150
2000	210	151	59	121	6	24	151
2001	245	151	94	120	7	24	151
2002	285	171	114	134	8	29	171
2003	235	162	73	130	7	25	162
2004	215	145	70	112	7	26	145
2005	225	145	80	107	8	30	145
2006	220	145	75	114	6	25	145
2007	215	144	71	115	7	22	144
2008	220	147	73	118	7	22	147
2009	220	150	70	121	7	22	150
2010	225	154	71	121	8	25	154
1/: Missing data were not published and/or surveyed in this form to avoid disclosure of individual operations.

## Sheet: Sheep lamb balance sheet
Sheep and Lambs Balance Sheet 1/
Year	Sheep on Hand Jan. 1	Lambs Saved		Inshipments		Marketing		Local Slaughter		Farm Slaughter		Deaths		On Hand End of Year	Lambs Raised
		Docked	Percent of Ewes 1+ Yrs	Sheep	Lambs	Sheep	Lambs	Sheep	Lambs	Sheep	Lambs	Sheep	Lambs		Ewes 1+ Yrs Jan. 1	Lambs Per 100 Ewes	Percent of Ewes 1+ Yrs
	1000		Percent	1,000 Head													Percent
1920	2250
1921	2160
1922	1966
1923	1868
1924	1924	1310	91	2	3	138	705	16	20	6	10	185	120	2039	1437	1190	83
1925	2039	1245	83	2	3	243	569	18	18	8	8	190	115	2120	1500	1130	75
1926	2120	1398	92	4		236	680	16	16	7	10	195	115	2247	1520	1283	84
1927	2247	1364	85	7		264	634	14	14	8	10	200	115	2359	1605	1249	78
1928	2359	1611	95	6		236	859	8	12	8	12	200	140	2501	1696	1471	87
1929	2501	1453	80	10		192	807	10	10	8	12	225	115	2585	1816	1338	74
1930	2585	1765	90	1	3	163	1154	5	20	5	15	235	78	2679	1961	1687	86
1931	2679	1877	92	5		255	1269	10	15	10	15	240	147	2600	2039	1730	85
1932	2600	1620	81	6		242	1066	11	15	11	16	325	100	2440	2000	1520	76
1933	2440	1513	81		4	103	894	12	18	10	20	320	100	2480	1866	1413	76
1934	2480	1700	91	2	5	164	985	12	18	10	20	320	120	2375	1868	1580	85
1935	2375	1449	84	5		322	985	10	20	9	15	248	105	2115	1725	1344	78
1936	2115	1390	84	8		172	854	10	20	8	15	224	110	2100	1655	1280	77
1937	2100	1264	79	6		256	837	9	20	7	14	260	85	1882	1600	1179	74
1938	1882	1350	93	6		140	911	9	19	8	14	184	105	1848	1452	1245	86
1939	1848	1274	89	7		240	903	8	18	7	13	180	85	1675	1432	1189	83
1940	1675	1228	93	10		86	841	8	18	7	13	162	82	1696	1320	1146	87
1941	1696	1294	99	11		178	858	7	19	7	12	186	97	1637	1307	1197	92
1942	1637	1070	88	11		194	731	7	18	7	11	204	89	1457	1216	981	81
1943	1457	905	80	11		167	646	4	19	7	10	203	90	1227	1131	815	72
1944	1227	896	89	13		99	666	7	16	5	10	170	88	1075	1007	808	80
1945	1075	789	89	8		125	611			6	12	140	77	901	886	789	89
1946	901	699	94	8	17	56	579			5	9	120	70	786	744	699	94
1947	786	636	96	7	8	43	501			4	9	95	52	733	662	636	96
1948	733	596	99	18	10	30	458			2	9	94	42	722	602	596	99
1949	722	526	90	15	15	37	407			1	7	96	41	689	584	526	90
1950	689	532	94	15	9	29	429			1	6	76	32	672	566	532	94
1951	672	554	99	30	3	11	386			1	5	78	35	743	560	554	99
1952	743	577	100	16	10	17	442			1	6	74	43	763	577	577	100
1953	763	617	99	37	9	11	471			1	7	84	41	811	623	617	99
1954	811	667	101	36	26	20	542			1	6	86	38	847	660	589	89
1955	847	693	100	14	40	18	575			1	5	93	50	852	693	693	100
1956	852	686	98	15	51	24	572			1	6	87	49	865	700	706	98
1957	865	693	99	16	49	18	568			1	6	88	52	890	700	700	99
1958	890	707	99	18	62	22	577			1	6	88	48	935	714	714	99
1959	935	721	99	18	47	83	572			1	6	88	55	916	728	721	99
1960	916	685	98	16	29	63	539			1	6	86	45	906	699	685	98
1961	906	692	99	5	50	102	558			1	6	88	56	842	699	692	99
1962	842	630	99	2	46	78	531			1	5	83	45	777	636	630	99
1963	777	603	102	1	45	74	489			1	6	75	41	740	591	603	102
1964	740	550	100	2	37	59	447			1	5	80	47	690	550	550	100
1965	690	502	98		50	62	407				6	76	43	648	512	502	98
1966	648	470	101		30	82	371				4	55	40	596	466	470	101
1967	596	434	102		45	56	360				3	50	40	566	425	434	102
1968	566	412	101		51	25	322				3	65	45	569	408	412	101
1969	569	376	95		40	32	294				4	70	44	541	396	376	95
1970	541	373	101		44	34	322				5	65	40	492	369	373
1971	492	366	99		60	33	261				4	45	50	525	349	366
1972	525	362	99		23	60	286				4	40	46	474	345	362
1973	474	350	104		31	19	242				5	33	41	515	315	350
1974	515	358			20	41	320				5	43	44	440	325	358
1975	440	329			40	51	243				6	40	49	420	302	329
1976	420	319			35	38	262				5	37	37	395	268	319
1977	395	279			35	4	205				5	35	35	425	247	279
1978	425	290			39	0	189				5	34	36	490	262	290
1979	490	300			24	51	179				5	38	46	495	282	300
1980	495	305			18	20	194				5	43	36	520	280	305
1981	520	360			5	15	245				7	38	40	540	310	360
1982	540	380			15	64	246				10	40	45	530	350	380
1983	530	333				51	222				5	45	45	495	310	333	103
1984	495	315				20	269				5	33	38	445	292	315	108
1985	445	320				29	233				3	30	40	430	285	320	112
1986	430	290				58	171				4	20	27	440	275	290	106
1987	440	320			79	22	279				7	20	31	480	285	320	105
1988	480	320			1	76	203				2	20	25	475	320	320	100
1989	475	310			56	37	291				3	20	35	455	310		111
1990	455	320				25	223				3	19	39	466	320		115
1991	466	320				44	262				4	17	26	433	320		112
1992	433	300				71	209				2	15	21	415	280		107
1993	415	270		51			178				2	12	22	420	250		108
1994	420	235		50			201				3	14	22	365	240	230	98
1995	365	220		43			157				3	14	15	353	220	220	100
1996	353	210		48			167				3	15	11	319	205	210	102
1997	319	195		51			151				3	16	8	285	180	185	108
1998	285	163		5		46	167				3	12	10	215	150		109
1999	215	150		20		20	131				3	8	13	210	120		117
2000	210	150		35		15	112				3	11	9	245
2001	245	160		40		6	130				3	9	12	285
2002	285	150		28		26	177				3	12	10	235
2003	235	135		33		36	133				3	11	10	210
2004	210	143		39		13	134				4	8	8	225	112	129
2005	225	170		24		22	158				4	7	8	220	107	140
2006	220	144		32		21	141				3	6	9	215	114	123
2007	215	153		36		19	144				4	8	9	220
2008	220	157		30		16	149				6	8	8	220
2009	220
2010	225
1/: Missing data were not published to avoid disclosure of individual operations.

## Sheet: Sheep lamb production income
Sheep & Lambs: Production & Income 1/
Year	Production 2/	Marketing 2/	Price		Value of Production	Cash Receipts 2/	Value of Home Consumption 2/	Gross Income 2/	Ending Inventory		Cost of Inshipments 3/
			Sheep	Lambs					Value	Total Value
	1,000 Pounds		Dollar/Cwt		1000				Dollar/Head	1000
1909			4.7	5.6
1910			5.6	6.4
1911			4.15	5
1912			4.2	5
1913			4.55	5.3
1914			4.75	5.6
1915			5.3	6.3
1916			6.2	7.8
1917			9.7	11.6
1918			10.3	12.5
1919			8.8	11.9
1920			7.4	9.6
1921			3.9	5.7
1922			6.4	8.5
1923			6.8	9.5
1924	83673	71578	7	9.6		6498	77	6575			48
1925	80472	72539	7.4	10.9		6940	85	7075			52
1926	93545	79860	7.2	10.7		7663	88	7751			39
1927	91634	78994	7.2	10.5		7378	93	7471			69
1928	108441	92304	8.6	11.1		9674	115	9789			61
1929	96103	83706	7.2	10.6		8211	104	8315			91
1930	118422	107200	4.8	6.3		6528	64	6592			21
1931	120484	125939	3.2	4.65		5485	57	5542			25
1932	93758	109227	2.25	3.7		3681	47	3728			25
1933	86848	81617	2.75	4.8		3712	67	3779			18
1934	96834	107774	3.1	5.1		4849	73	4922			31
1935	91294	111904	3.25	6		5784	65	5849			29
1936	84218	85898	3.8	7.4		5708	76	5784			47
1937	72540	93425	4.1	8.1		6454	76	6530			36
1938	84950	87070	3.35	6.1		4903	60	4963			31
1939	81181	97276	3.6	6.9		5855	62	5917			38
1940	77564	75624	3.75	7.5		5330	66	5396			55
1941	82973	90188	4.65	8.8		7121	75	7196			74
1942	65549	81884	5.1	10.8		7606	83	7689			87
1943	50428	71858	6.1	11.6		7334	87	7421			102
1944	50738	66568	6.1	11.4		7007	83	7090			110
1945	47327	64897	6.2	12		7036	104	7140			75
1946	42472	55042	7.1	15.4		8014	100	8114			309
1947	41051	47561	7.5	20.3		9104	118	9222			206
1948	39609	42854	8.7	22.8		9367	120	9487			415
1949	33686	38876	8.4	19.9		7298	79	7377			454
1950	37090	40260	9.5	23		8861	79	8940			422
1951	37909	34869	13.7	29.6		10175	90	10265			659
1952	44779	40014	8.8	24.1		9393	88	9481			361
1953	46018	41333	5.9	18.3		7447	77	7524			442
1954	50942	47897	4.9	17.3		8031	65	8096			650
1955	52471	52181	5.5	17	8340	8640	56	8696			660
1956	48757	52592	5	17.8	8520	9014	73	9092			830
1957	50733	52118	5.4	19	9333	9613	83	9696			923
1958	58002	55727	7.1	20.3	10922	10990	90	11080			1159
1959	54558	62368	5.1	18.4	9482	10213	80	10293			739
1960	51334	55389	4.4	17	7973	8508	73	8581			436
1961	50209	62164	3.8	14.7	7139	7857	66	7923			556
1962	46091	56941	4.6	17.5	7657	8812	68	8880			626
1963	44421	52676	4.8	18	7620	8355	84	8439			600
1964	38442	47112	4.4	19.7	7337	8241	76	8317			559
1965	36165	45470	5.1	21.1	7549	8448	84	8532			798
1966	36062	44772	5.7	22.6	7590	8510	70	8580			496
1967	33873	40914	5.2	21.6	6815	7735	70	7805			672
1968	33575	33693	5.7	23.9	7536	7489	82	7571			861
1969	25530	32840	6.7	26.2	6746	7799	136	7935			750
1970	30051	35852	5.8	25.1	6950	8149	138	8287
1971	28632	29755	5.6	25.6	6778	6760	122	6882
1972	28937	36910	6.6	27.3	7306	8462	111	8573
1973	30504	27454	13.9	33.2	9432	8639	296	8935
1974	29176	38404	9	32.5	9190	11229	341	11570
1975	26070	31508	9.7	40.5	10132	10720	510	11230
1976	26741	31923	12.3	43.2	11125	12264	454	12718
1977	23544	21520	11.4	49.8	10775	10517	523	10040
1978	24811	19536	16.7	61.4	13995	11995	501	12496
1979	25388	25993	17.7	62.7	13121	13314	537	13851
1980	26166	22708	13.7	60.4	12467	12501	476	12977
1981	32528	27674	15.7	54.4	14630	14381	680	15061
1982	30044	33535	13.2	51.9	14412	14432	884	15316
1983	24154	28254	11.3	50.2	11585	11803	507	12310
1984	26691	30696	12.7	56.8	14506	16333	477	16810
1985	27240	29190	19.9	65.6	16962	17492	108	17600
1986	28590	26008	18.6	65.9	14726	13710	670	14380
1987	34290	34263	23.3	75.8	25417	24528	1043	25571
1988	30460	32500	20.3	62.3	17343	16258	358	16616
1989	32060	37338	19.3	64.8	18736	22091	711	22802
1990	30655	28359	17.5	51.8	14403	13618	391	14009
1991	32940	35230	16	47.4	13963	14972	408	15380
1992	30195	32749	20.7	55	14894	14968	215	15183
1993	26895	26155	25.5	58.1	14206	13118	558	13676	68	28560
1994	23070	28560	25.6	59.8	12739	14941	718	15659	68	24820
1995	21620	22625	23.3	72.3	14249	13724	868	14592	82	28946
1996	20825	24400	22.4	83.1	16252	16634	997	17631	91	29029
1997	19130	22935	31.2	84.3	15253	15949	1012	16961	96	27360
1998	11910	19375	30.1	66.2	7481	10834	556	11390	80	175200
1999	10945	10540	27.7	66.9	6560	6252	562	6814	83	17430
2000	11795	10980	27.2	79.4	8533	7779	667	8446	93	22785
2001	13080	11430	28.8	68.2	8043	7512	573	8085	80	22822
2002	11490	17825	25.5	68	7006	10795	571	11366	93	21855
2003	9960	15285	31.9	88.2	8297	11049	741	11790	117	24570
2004	11835	12610	36.1	94.4	10165	10994	906	11900	118	26550
2005	13912	15730	41.2	101	13075	14309	906	15215	128	28160
2006	11751	14165	36.7	89.6	9531	11359	817	12176	121	26015
2007	12388	14265	31.8	95.3	10713	12147	842	12989	125	27500
2008	12825	14330			11369	12686	1013	13699
1/: Missing data were not published to avoid individual operations.
2/: Data were not published in this form until 1923.
3/: Data were only published between 1923 and 1969.

## Sheet: Sheep and lambs value class
Sheep and Lambs: Number on Hand January 1, Value Number by Class 1/
Year	All Sheep			Stock: Sheep and Lamb			On Feed January 1	By Classes						Replacement Lambs
	Number	Average Value	Total Value	Number	Average Value	Total Value		Lambs			One Year and Older
								All Lanbs	Ewes	Withers & Rams	Ewes	Rams	Withers
	1,000 Head	Dollar/Head	1000	1,000 Head	Dollar/Head	1000	1,000 Heads
1867				270	1.9	513
1868				324	1.9	616
1869				389	1.9	739
1870				467	1.9	887
1871				513	1.9	975
1872				590	2.45	1446
1873				649	2.75	1785
1874				681	2.5	1702
1875				770	2.6	2002
1876				847	2	1694
1877				1016	1.8	1829
1878				1189	1.75	2081
1879				1308	1.55	2027
1880				1504	1.45	2181
1881				1672	1.45	2424
1882				1672	1.6	2675
1883				1722	2.15	3702
1884				1843	1.8	3317
1885				1751	1.6	2802
1886				1663	1.45	2411
1887				1715	1.4	2401
1888				1720	1.7	2924
1889				1800	1.75	3150
1890				1910	1.9	3629
1891				1950	2.1	4095
1892				2000	2.25	4500
1893				2090	2.4	5016
1894				2154	1.75	3770
1895				2220	1.15	2553
1896				2118	1.35	2859
1897				2195	1.35	2963
1898				2085	1.65	3440
1899				2056	2.5	5140
1900				2179	2.65	5774
1901				2345	3.05	7152
1902				2556	2.5	6390
1902				2620	2.55	6681
1904				2452	2.05	5027
1905				2378	2.3	5469
1906				2497	2.85	7116
1907				2525	3.55	8964
1908				2441	3.6	8788
1909				2563	3.1	7945
1910				2717	3.7	10053
1911				2690	3.9	10491
1912				2630	3.3	8679
1913				2520	3.8	9576
1914				2314	3.9	9025
1915				2083	4.5	9374
1916				2010	5.2	10452		572			1580	48	25
1917				2015	8.1	16322		530			1530	45	20
1918				2160	12.1	26136		431			1445	40	10
1919				2220	12	26640		368			1420	40	10
1920	2250	10.7	24035	2225	10.7	23823	25	410			1437	40	12
1921	2160	6.6	14264	2125	6.6	14082	35		404	30	1500	42	13
1922	1966	4.4	8742	1926	4.45	8582	40		448	40	1520	42	15
1923	1868	6.4	12000	1838	6.4	11823	30		484	35	1605	45	13
1924	1924	8.4	16094	1899	8.4	15919	25		528	39	1696	48	18
1925	2039	10.4	21206	1989	10.5	20806	50		540	36	1816	52	17
1926	2120	11.5	24380	2065	11.6	23874	55		460	35	1961	56	18
1927	2247	10.4	23369	2182	10.5	22829	65		470	39	2039	58	18
1928	2359	11.3	26657	2329	11.3	26399	30		401	37	2000	55	17
1929	2501	11.5	28762	2461	11.5	28402	40		410	33	1866	52	14
1930	2585	9	23265	2530	9	22825	55		456	34	1868	53	14
1931	2679	5.4	14467	2624	5.4	14219	55		482	30	1725	50	13
1932	2600	3.6	9360	2510	3.6	9099	90		326	28	1655	49	12
1933	2440	2.9	7076	2375	2.9	6914	65		342	24	1600	48	11
1934	2480	3.9	9709	2425	3.95	9530	55		294	19	1452	43	9
1935	2375	4.65	11044	2300	4.7	10810	75		295	16	1432	42	8
1936	2115	6.1	12902	2070	6.2	12834	45		230	15	1320	39	6
1937	2100	6.5	13650	2025	6.6	13365	75		259	15	1307	39	6
1938	1882	6.7	12609	1817	6.7	12174	65		298	15	1216	42	6
1939	1848	6	11088	1793	6	10758	55		225	18	1131	40	5
1940	1675		11499	1610	6.9	11109	65		123	20	1007	37	5
1941	1696		12766	1626	7.6	12297	70		95	18	886	33	5
1942	1637		15596	1577	9.6	15098	60		76	11	744	26	4
1943	1457		14267	1419	9.8	13925	38		61	9	662	23	3
1944	1227		11256	1192	9.2	10958	35		83	7	602	18	3
1945	1075		8930	1037	8.3	8607	38		94	7	584	18	3
1946	901		9174	861	10.2	8782	40		76	8	566	18	3
1947	786		10280	758	13.1	9930	28		71	6	560	17	3
1948	733		12104	713	16.5	11764	20		119	7	577	18	2
1949	722		14071	706	19.5	13767	16		91	7	623	22	2
1950	689		12518	671	18.2	12212	18		98	7	660	23	2
1951	672		19443	657	29	19053	15		93	11	693	23	2
1952	743		24439	723	33	23859	20		87	10	700	23	2
1953	763		14926	745	19.6	14602	18		95	10	700	23	2
1954	811		13371	790	16.5	13035	21		97	11	714	23	2
1955	847		14703	822	17.4	14303	25		116	11	728	24	2
1956	852		13019	822	15.4	12659	30		125	11	699	26	2
1957	865		14172	830	16.4	13612	35		108	10	699	27	2
1958	890		18689	847	21.1	17872	43		108	9	636	23	2
1959	935		19845	881	21.3	18765	54		96	11	591	24	2
1960	916		16608	863	18.2	15707	53		91	8	550	22	2
1961	906		14834	846	16.4	13874	60		79	9	512	24	2
1962	842		11257	778	13.4	10425	64		84	7	466	23	2
1963	777		11945	724	15.4	11150	53		68	8	425	22	1
1964	740		10831	673	14.6	9826	67		65	6	408	18	1
1965	690		11480	626	16.6	10392	64		63	6	396	17	1
1966	648		12785	582	19.7	11465	66		68	7	369	15	1
1967	596		12988	524	21.9	11476	72		57	8	349	16
1968	566		12452	498	22	10956	68		57	8	345	16
1969	569		14128	483	24.8	11978	86		47	9	315	14
1970	541		14107	460	26	11960	81		47	9	325	14
1971	492	27	13284	430	27	11610	62		43	12	302	13
1972	525	27	14175	426	27	11502	99		40	10	268	12
1973	474	28	13272	385	28	10780	89		42	10	247	11
1974	515	32	16480	395	32	12640	120		44	8	262	11
1975	440	26	11440	370	26	9620	70		74	12	282	12
1976	420	39	16380	330			90		80	13	280	12
1977	395	41	16195	310			85		82	13	310	15
1978	425	49	20886	325			100		60	13	350	17
1979	490	73.5	36124	380			110		52	12	322	14
1980	495	71.5	35393	385			110		36	10	292	12
1981	520	65.5	34060	420			100		35	13	285	12
1982	540	53.5	28890	440			100		33	6	275	11
1983	530	49.5	26235	400			130		44	10	285	11
1984	495	52.5	25988	350			145		45	12	320	13
1985	445	59	26255	345			100		42	14	280	14
1986	430	62	26660	325			105		40	14	279	12
1987	440	69	30360	350			90		43	15	285	17
1988	480	83	39840	390			90		41	15	280	16		20
1989	425	67.5	32063	350			125		36	20	250	14		24
1990	455	66	30030	345			110		31	17	240	12		43
1991	466	54	25164	360			106			15	220	12		40
1992	433	49	21217	352			81			13	205	13		35
1993	415	56	23240	320			95			9	180	9		35
1994	390	68	28560	300			90				150	7		28
1995	330	68	24820	275							120	6		24
1996	353	82	28946	253							121	6		24
1997	304	91	29029	224							120	7		24
1998	285	96	27360	185							134	8		29
1999	215	80	17200	150				140	108		130
2000	210	83	17430	151				145	129		112
2001	245	93	22785	151				150			107
2002	285	80	22800	171				140			114
2003	235	93	21855								130
2004	215	117	25155								112
2005	225	120	27000								120
2006	220	128	28160								121
2007	215	121	26015								118
1/: Missing data were not published to avoid individual operations or no longer published.

## Sheet: Market sheep lambs
Market Sheep and Lambs: January 1 1/
Year	Total Lambs	Total Sheep	Total All Sheep & Lamb	Lambs on Feed by Weight Class
				Under 65 Pounds	65 - 84 Pounds	Under 85 Pounds	85 - 105 Pounds	Over 105 Pounds
	1,000 Head
1993	94	1	95			23.5	55	15.5
1994	86	2	88			33	44	11
1995	88	2	90	10	23	33	44	11
1996	98	3	101	19	12	31	43	24
1997	92	3	95	17	14	31	40	21
1998	97	3	100	15	13	28	41	28
1999	60	5	65	14	6	20	36	4
2000	56	3	59	10	7	17	27	12
2001	91	3	94	10	12	22	34	35
2002	111	3	114	20	16	36	41	34
2003	71	2	73	12	14	26	25	20
2004	66	1	67	11	11	22	24	20
2005	72	2	74	10	10	20	30	22
2006	70	1	71	10	11	21	27	22
2007	66	2	68	10	10	20	25	21
2008	69	2	71	10	10	20	26	23
2009	67	3	70	10	10	20	23	24
2010	68	3	71	11	13	24	22	22
1/: Missing data were not published to avoid disclosure of individual operations.

## Sheet: 5&10 year average=sheep
Averages for Sheep Conditions at Beginning of Month 1/ 2/ 3/
Year	January	February	March	April	May	June	July	August	September	October	November	December	Average 4/
	Number												Years
1965					83	86	87	85	84	84	84	84	1959-1963
1966	84	83	83	82	83	86	86	86	84	84	84	83	1960-1964
1967	84	82	83	82	82	86	86	86	84	84	84	84	1961-1965
1968	84	83	83	83	83	86	86	86	85	85	85	85	1962-1966
1969						86	86	85	84	84	84	84	1958-1967
1970	84	84	84	83	84	86	86	85	84	84	84	85	1959-1968
1971	85	84	83	83	84	86	87	86	84	84	85	85	1960-1969
1/: Monthly averages were not reported from January 1 through April 1, 1965 and January 1 through May 1,1969.
2/: Numerical equivalent of condition: 49 or below is very bad; 50 - 50 is bad; 60 - 69 is poor; 70 - 79 is fair; 80 - 89 is good; 90 - 99 is very good; 100 and over is excellent.
3/: From May 1, 1965 through December 1, 1968, the averages were for five years. Then from June 1, 1969 through December 1, 1971, the averages were for ten years.
4/: Years in average.

## Sheet: Sheep Conditions
Sheep Condition: First of Month 1/ 2/
Year	January	February	March	April	May	June	July	August	September	October	November	December
	Number
1922										86	88	90
1923	90	95	95	95	98	101	101	101	101	97	97	101
1924	99	98	100	99	100	85	85	85	78	78	76	82
1925	84	91	92	94	95	96	98	99	99	100	98	100
1926	100	99	99	99	101	98	96	94	88	92	91	92
1927	92	92	92	92	91	93	96	98	99	99	98	101
1928	99	98	98	99	97	95	94	97	93	93	91	90
1929	90	90	90	87	85	92	94	95	88	86	83	78
1930	84	84	90	90	94	93	92	89	86	86	87	90
1931	90	93	94	94	91	90	89	84	81	77	80	82
1932	83	80	77	74	80	88	92	93	89	88	88	89
1933	88	87	85	81	77	82	85	87	83	84	83	86
1934	86	90	94	94	91	90	89	84	78	77	74	84
1935	84	83	82	82	84	88	86	88	86	85	87	86
1936	86	86	85	85	89	89	93	89	88	87	81	81
1937	84	83	80	81	81	87	90	91	87	88	90	92
1938	88	90	90	88	92	93	92	90	87	87	87	89
1939	90	89	90	86	84	81	82	83	79	78	81	82
1940	82	85	87	90	91	93	91	85	85	88	92	92
1941	92	90	90	91	91	94	95	92	93	93	93	91
1942	89	86	85	81	81	87	90	90	88	84	82	80
1943	82	77	77	77	78	84	86	88	86	85	84	84
1944	85	85	84	83	83	83	87	86	82	80	81	82
1945	82	82	83	83	82	87	90	89	86	86	85	84
1946	84	84	84	84	86	86	87	86	86	85	87	86
1947	86	84	85	87	88	89	89	87	87	84	88	89
1948	87	87	84	82	84	88	92	91	89	88	89	86
1949	85	79	78	80	81	84	83	81	79	79	80	81
1950	82	81	81	82	83	85	88	88	86	84	88	86
1951	90	89	87	87	85	86	86	84	81	81	86	86
1952	87	84	83	83	84	88	88	88	86	84	82	81
1953	81	81	84	83	83	87	89	87	86	88	86	87
1954	86	85	85	85	85	84	87	87	86	85	85	84
1955	84	84	83	81	79	83	85	85	83	83	85	84
1956	82	81	80	80	82	85	87	86	86	86	85	84
1957	84	82	82	84	85	88	89	88	86	84	86	85
1958	85	86	86	87	86	88	88	87	84	85	85	83
1959	85	85	84	83	83	85	86	82	84	83	83	84
1960	84	84	83	83	84	86	85	85	82	82	82	81
1961	82	80	83	82	84	86	86	84	81	82	82	81
1962	83	81	82	79	83	85	87	85	85	83	85	85
1963	4/
1964					82	84	84	86	84	84	84	82
1965	81	80	82	81	80	86	85	85	84	84	84	86
1966	83	85	84	86	87	85	83	83	83	84	84	87
1967	85	85	87	86	87	88	91	87	84	82	85	88
1968	87	87	86	87	85	87	88	86	87	87	88	88
1969	87	83	78	83	85	88	89	88	86	87	87	87
1970	87	86	86	86	86	87	86	86	84	85	87	83
1971	84	81	83	84	84	84	89	90	88	87	87	86
1/: Monthly range and livestock reports were started in October 1922 and no longer published after 1971.
2/: Numerical equivalent of condition: 49 or below is very bad; 50 - 50 is bad; 60 - 69 is poor; 70 - 79 is fair; 80 - 89 is good; 90 - 99 is very good; 100 and over is
excellent.
3/: Data were surveyed and/or published in this form for these years only.
4/: Data were not published January 1, 1963 through April 1, 1964.

## Sheet: Stock sheep & lambs for Jan 1
Number of Stock Sheep and Lambs on Farms and Ranches on January 1
1940	1941	1942	1943	1944	1945	1946	1947	1948	1949	1950	1951	1952	1953	1954	1955	1956	1957
1,000 Head
1610	1626	1577	1419	1192	1037	861	758	713	706	671	657	723	745	790	822	822	830
1958	1959	1960	1961	1962	1963	1964	1965	1966	1967	1968	1969	1970	1971	1972	1973	1974	1975
1,000 Head
847	881	863	846	778	724	673	639	582	524	498	483	460	430	426	385	375	355

## Sheet: Shpmtofstocker&feedersheep&lamb
Direct Shipment of Stocker and Feeder Sheep and Lamb to Selected North Central States 1/ 2/
Year	January	February	March	April	May	June	July	August	September	October	November	December	Total
	Number
1941	2096				600	1247	5167	65766	41258	3163	240	2360	121897
1942						2472	1960	29709	41599	1937	2856	1290	81823
1943						3804	1050	18605	5030	455	14032		42976
1944	250				750		5444	22363	19496	600			48903
1945							3210	25596	7418	695			36909
1946					300	1606	6141	4082	10562	838			23529
1947							466	26314	3455	992	450		31677
1948								3266	721			1221	5208
1949							4476	9215	5260	1			18952
1950	1				1400			8050	23869	2006			35236
1951			186				1759	17059	5599	1955			26558
1952					8		700	7269	8777			1713	18467
1953								9372	6619	1482	2009		19482
1954								12128	300			1490	13918
1955								7339	13551	2119	324	371	23704
1956						2084	3363	2534	3325	1			11307
1957							6042	12687	13495	5109			37333
1958	3/
1959	800					1743	11433	26580	3075		857		44488
1960						1010	1334	12808	2622	1593	482		19849
1961						533	2788	12296	2963	36	150		18766
1962							1729	586	407	562			3284
1963	2			1			1543	2073	500				4119
1964	3/
1965			327					2	728	550	1		1608
1966								658	1521	90	3		2272
1967				11		109	6						126
1968					193	35		1		1357			1586
1/: Directs include stock and feeders coming from points other than public stockyards, some of which are inspected at public stockyards while stopping for feed, water,
and rest while enroute.
2/: Missing data was not published to avoid disclosure of individual operations or no livestock shipped that month.
3/: Data were not surveyed and/or published for these two years only.

[truncated: 2 more sheets: Shippedfrom fed insp stkyrds, Feeding lvskt from fed insptd]
