# Supplementary material for: The Elephant in the room: What can we learn from California regarding the use of sport hunting of pumas (Puma concolor) as a management tool?
Source: PLOS journal article supplement (doi:10.1371/journal.pone.0224638), 2020-02-13
Supplement: S3 (10.1371/journal.pone.0224638.s003) [file journal.pone.0224638.s003]

HDR1012000130030517961500CATTLE

HDR2012000130030517961500CATTLE PREDATOR LOSS

Released May 17, 1996, by the National Agricultural Statistics Service (NASS), Agricultural Statistics Board, U.S. Department of Agriculture. For information on "Cattle Predator Loss" call Livestock, Dairy, and Poultry Branch at (202) 720-6146, office hours 8:00 a.m. to 4:30 p.m. ET. For assistance with general agricultural statistics, information about NASS, its products or services, contact the NASS Information Hotline at 1-800-727-9540 or E-mail: NASS@NASS.USDA.GOV.

#### 1995 Cattle and Calf Death Losses Valued at \$1.8 Billion

A total of 4.38 million head of cattle and calves died from all causes during 1995 in the United States. This estimate excludes Alaska. Predators accounted for 117,400 head or 2.7 percent, while other causes made up the remainder. These total losses cost ranchers and farmers a total of \$1.80 billion with predator losses at \$39.6 million and other losses at \$1.76 billion.

Coyotes were the largest cause of cattle and calf predator losses at 69,350 head or 59 percent of the total loss to predators. The value of coyote losses was \$21.8 million. Dogs were the second leading cause of predator losses, accounting for 19 percent of predator losses. The western and mountain region accounted for 67 percent of all predator losses. Respiratory problems led the other causes with 28 percent of the total deaths. The value of these losses was \$478 million. The second leading other cause of deaths in cattle and calves was digestive problems with 20 percent of the total. The value of these losses was \$316 million.

This report is released as a cooperative effort between the National Agricultural Statistics Service, and APHIS - Animal Damage Control and APHIS - National Animal Health Monitoring System.

Mt An 2 (5-96)

Losses of Cattle and Calves from All Causes, Number of  
Head and Total Value, United States, 1995 1/

| Cause                    | :<br>: Number of<br>: Head | :<br>: Percent<br>: Total Deaths | :<br>: Total<br>: Value |
|--------------------------|----------------------------|----------------------------------|-------------------------|
|                          | : Head                     | Percent                          | 1,000 Dollars           |
| Coyotes                  | : 69,350                   | 1.6                              | 21,798                  |
| Dogs                     | : 21,800                   | .5                               | 6,952                   |
| Mountain Lions & Bobcats | : 8,050                    | .2                               | 2,780                   |
| Bears                    | : 1,800                    | .0                               | 813                     |
| Wolves                   | : 2,500                    | .1                               | 891                     |
| Other Predators          | : 13,900                   | .3                               | 6,328                   |
| Total Predators          | : 117,400                  | 2.7                              | 39,562                  |
| Digestive Problems       | : 863,200                  | 19.7                             | 316,457                 |
| Respiratory Problems     | : 1,203,350                | 27.5                             | 478,158                 |
| Calving Problems         | : 646,925                  | 14.8                             | 270,148                 |
| Weather                  | : 417,000                  | 9.5                              | 169,073                 |
| Poison                   | : 49,300                   | 1.1                              | 24,566                  |
| Theft                    | : 19,700                   | .4                               | 8,285                   |
| Other Causes             | : 399,150                  | 9.1                              | 204,055                 |

|                           |   |           |       |           |
|---------------------------|---|-----------|-------|-----------|
| Unknown Causes            | : | 664,375   | 15.2  | 291,097   |
|                           | : |           |       |           |
| Total Non-Predator Causes | : | 4,263,000 | 97.3  | 1,761,839 |
|                           | : |           |       |           |
| Total Losses              | : | 4,380,400 | 100.0 | 1,801,402 |

1/ Totals may not add due to rounding.

Losses of Cattle by Predators, Other Causes and Total,  
by State and United States, 1995 1/

|       | : | Total  | : | Predators    | : | Other Causes |
|-------|---|--------|---|--------------|---|--------------|
|       | : |        | : |              | : |              |
| State | : |        | : | Percent of   | : | Percent of   |
|       | : | Cattle | : | Total Deaths | : | Total Deaths |
|       | : |        | : |              | : |              |
|       | : | Head   | : | Percent      | : | Head         |
|       | : |        | : |              | : | Percent      |
| AL    | : | 27,000 | : | 400          | : | 1.5          |
| AZ    | : | 30,000 | : | 900          | : | 3.0          |
| AR    | : | 30,000 | : | 400          | : | 1.3          |
| CA    | : | 90,000 | : | 1,500        | : | 1.7          |
| CO    | : | 45,000 | : | 400          | : | .9           |
| CT    | : | 1,000  | : |              | : | 1,000        |
| DE    | : | 1,000  | : |              | : | 1,000        |
| FL    | : | 30,000 | : | 600          | : | 2.0          |
| GA    | : | 25,000 | : | 300          | : | 1.2          |
| HI    | : | 4,000  | : | 100          | : | 2.5          |
| ID    | : | 26,000 | : | 300          | : | 1.2          |
| IL    | : | 25,000 | : | 100          | : | .4           |
| IN    | : | 15,000 | : | 200          | : | 1.3          |
| IA    | : | 58,000 | : | 400          | : | .7           |
| KS    | : | 92,000 | : | 500          | : | .5           |
| KY    | : | 45,000 | : | 500          | : | 1.1          |
| LA    | : | 15,000 | : | 200          | : | 1.3          |
| ME    | : | 2,000  | : |              | : | 2,000        |
| MD    | : | 5,000  | : | 75           | : | 1.5          |
| MA    | : | 1,000  | : | 75           | : | 7.5          |
| MI    | : | 25,000 | : | 200          | : | .8           |
| MN    | : | 60,000 | : | 600          | : | 1.0          |
| MS    | : | 35,000 | : | 600          | : | 1.7          |

|    |   |           |        |     |           |       |
|----|---|-----------|--------|-----|-----------|-------|
| MO | : | 65,000    | 700    | 1.1 | 64,300    | 98.9  |
| MT | : | 23,000    | 500    | 2.2 | 22,500    | 97.8  |
| NE | : | 80,000    | 500    | .6  | 79,500    | 99.4  |
| NV | : | 6,000     | 200    | 3.3 | 5,800     | 96.7  |
| NH | : | 1,000     |        |     | 1,000     | 100.0 |
| NJ | : | 1,000     |        |     | 1,000     | 100.0 |
| NM | : | 22,000    | 600    | 2.7 | 21,400    | 97.3  |
| NY | : | 30,000    | 200    | .7  | 29,800    | 99.3  |
| NC | : | 19,000    | 400    | 2.1 | 18,600    | 97.9  |
| ND | : | 19,000    | 200    | 1.1 | 18,800    | 98.9  |
| OH | : | 24,000    | 200    | .8  | 23,800    | 99.2  |
| OK | : | 95,000    | 2,100  | 2.2 | 92,900    | 97.8  |
| OR | : | 28,000    | 300    | 1.1 | 27,700    | 98.9  |
| PA | : | 29,000    | 200    | .7  | 28,800    | 99.3  |
| RI | : | 100       |        |     | 100       | 100.0 |
| SC | : | 10,000    | 100    | 1.0 | 9,900     | 99.0  |
| SD | : | 60,000    | 400    | .7  | 59,600    | 99.3  |
| TN | : | 40,000    | 500    | 1.3 | 39,500    | 98.8  |
| TX | : | 240,000   | 4,000  | 1.7 | 236,000   | 98.3  |
| UT | : | 14,000    | 200    | 1.4 | 13,800    | 98.6  |
| VT | : | 5,000     | 75     | 1.5 | 4,925     | 98.5  |
| VA | : | 24,000    | 400    | 1.7 | 23,600    | 98.3  |
| WA | : | 22,000    | 200    | .9  | 21,800    | 99.1  |
| WV | : | 6,000     | 75     | 1.3 | 5,925     | 98.8  |
| WI | : | 70,000    | 600    | .9  | 69,400    | 99.1  |
| WY | : | 15,000    | 200    | 1.3 | 14,800    | 98.7  |
| :  | : |           |        |     |           |       |
| US | : | 1,635,100 | 21,200 | 1.3 | 1,613,900 | 98.7  |

1/ Missing predator loss data are included with other causes to avoid disclosure of individual operations.

Losses of Calves by Predators, Other Causes and Total,  
by State and United States, 1995 1/

|       | : | Total  | : | Predators    | : | Other Causes |
|-------|---|--------|---|--------------|---|--------------|
| State | : | Calves | : | Calves       | : | Calves       |
|       | : |        | : | Percent of   | : | Percent of   |
|       | : |        | : | Total Deaths | : | Total Deaths |
|       | : | -----  | : | Head         | : | Head         |
|       | : |        | : | Percent      | : | Percent      |

|    |   |         |       |      |         |       |
|----|---|---------|-------|------|---------|-------|
|    | : |         |       |      |         |       |
| AL | : | 47,000  | 2,700 | 5.7  | 44,300  | 94.3  |
| AZ | : | 30,000  | 3,300 | 11.0 | 26,700  | 89.0  |
| AR | : | 45,000  | 1,700 | 3.8  | 43,300  | 96.2  |
| CA | : | 135,000 | 4,100 | 3.0  | 130,900 | 97.0  |
| CO | : | 60,000  | 3,500 | 5.8  | 56,500  | 94.2  |
| CT | : | 1,000   |       |      | 1,000   | 100.0 |
| DE | : | 1,000   |       |      | 1,000   | 100.0 |
| FL | : | 44,000  | 1,100 | 2.5  | 42,900  | 97.5  |
| GA | : | 34,000  | 1,400 | 4.1  | 32,600  | 95.9  |
| HI | : | 4,000   | 200   | 5.0  | 3,800   | 95.0  |
| ID | : | 52,000  | 1,300 | 2.5  | 50,700  | 97.5  |
| IL | : | 45,000  | 1,700 | 3.8  | 43,300  | 96.2  |
| IN | : | 31,000  | 700   | 2.3  | 30,300  | 97.7  |
| IA | : | 115,000 | 1,000 | .9   | 114,000 | 99.1  |
| KS | : | 70,000  | 1,400 | 2.0  | 68,600  | 98.0  |
| KY | : | 85,000  | 4,000 | 4.7  | 81,000  | 95.3  |
| LA | : | 21,000  | 1,100 | 5.2  | 19,900  | 94.8  |
| ME | : | 4,000   | 75    | 1.9  | 3,925   | 98.1  |
| MD | : | 7,000   | 75    | 1.1  | 6,925   | 98.9  |
| MA | : | 1,000   | 75    | 7.5  | 925     | 92.5  |
| MI | : | 60,000  | 200   | .3   | 59,800  | 99.7  |
| MN | : | 115,000 | 1,500 | 1.3  | 113,500 | 98.7  |
| MS | : | 42,000  | 1,800 | 4.3  | 40,200  | 95.7  |
| MO | : | 140,000 | 1,900 | 1.4  | 138,100 | 98.6  |
| MT | : | 57,000  | 1,800 | 3.2  | 55,200  | 96.8  |
| NE | : | 100,000 | 1,500 | 1.5  | 98,500  | 98.5  |
| NV | : | 12,000  | 1,300 | 10.8 | 10,700  | 89.2  |
| NH | : | 1,000   |       |      | 1,000   | 100.0 |
| NJ | : | 2,000   |       |      | 2,000   | 100.0 |
| NM | : | 36,000  | 2,000 | 5.6  | 34,000  | 94.4  |
| NY | : | 65,000  | 400   | .6   | 64,600  | 99.4  |
| NC | : | 30,000  | 800   | 2.7  | 29,200  | 97.3  |
| ND | : | 58,000  | 1,300 | 2.2  | 56,700  | 97.8  |
| OH | : | 52,000  | 500   | 1.0  | 51,500  | 99.0  |
| OK | : | 150,000 | 8,500 | 5.7  | 141,500 | 94.3  |
| OR | : | 50,000  | 4,400 | 8.8  | 45,600  | 91.2  |
| PA | : | 52,000  | 500   | 1.0  | 51,500  | 99.0  |
| RI | : | 300     |       |      | 300     | 100.0 |
| SC | : | 15,000  | 700   | 4.7  | 14,300  | 95.3  |
| SD | : | 165,000 | 2,400 | 1.5  | 162,600 | 98.5  |

|    |   |           |        |     |           |      |
|----|---|-----------|--------|-----|-----------|------|
| TN | : | 80,000    | 3,800  | 4.8 | 76,200    | 95.3 |
| TX | : | 270,000   | 25,000 | 9.3 | 245,000   | 90.7 |
| UT | : | 26,000    | 1,000  | 3.8 | 25,000    | 96.2 |
| VT | : | 10,000    | 75     | .8  | 9,925     | 99.3 |
| VA | : | 65,000    | 1,600  | 2.5 | 63,400    | 97.5 |
| WA | : | 29,000    | 1,000  | 3.4 | 28,000    | 96.6 |
| WV | : | 11,000    | 200    | 1.8 | 10,800    | 98.2 |
| WI | : | 190,000   | 1,000  | .5  | 189,000   | 99.5 |
| WY | : | 30,000    | 1,600  | 5.3 | 28,400    | 94.7 |
| :  | : |           |        |     |           |      |
| US | : | 2,745,300 | 96,200 | 3.5 | 2,649,100 | 96.5 |

1/ Missing predator loss data are included with other causes to avoid disclosure of individual operations.

Losses of Cattle and Calves by Coyotes and Dogs, by State and United States, 1995 1/

|       | : | Coyotes |         |   |        | :       | Dogs   |         |        |         |
|-------|---|---------|---------|---|--------|---------|--------|---------|--------|---------|
| State | : | :       | % of    | : | % of   | :       | % of   | :       | % of   |         |
|       | : | Cattle  | Total   | : | Calves | Total   | Cattle | Total   | Calves | Total   |
|       | : | :       | Pred.   | : | :      | Pred.   | :      | :       | Pred.  | :       |
|       | : | Head    | Percent |   | Head   | Percent | Head   | Percent | Head   | Percent |
| AL    | : | 200     | 50.0    |   | 2,000  | 74.1    | 100    | 25.0    | 600    | 22.2    |
| AZ    | : | 400     | 44.4    |   | 1,500  | 45.5    | 100    | 11.1    | 200    | 6.1     |
| AR    | : | 100     | 25.0    |   | 500    | 29.4    | 100    | 25.0    | 1,000  | 58.8    |
| CA    | : | 500     | 33.3    |   | 1,900  | 46.3    | 200    | 13.3    | 700    | 17.1    |
| CO    | : | 100     | 25.0    |   | 3,000  | 85.7    |        |         | 100    | 2.9     |
| CT    | : |         |         |   |        |         |        |         |        |         |
| DE    | : |         |         |   |        |         |        |         |        |         |
| FL    | : | 200     | 33.3    |   | 400    | 36.4    | 100    | 16.7    | 400    | 36.4    |
| GA    | : | 100     | 33.3    |   | 800    | 57.1    | 100    | 33.3    | 500    | 35.7    |
| HI    | : |         |         |   |        |         | 100    | 100.0   | 200    | 100.0   |
| ID    | : | 100     | 33.3    |   | 800    | 61.5    |        |         | 100    | 7.7     |
| IL    | : |         |         |   | 900    | 52.9    |        |         | 400    | 23.5    |
| IN    | : | 100     | 50.0    |   | 600    | 85.7    |        |         |        |         |
| IA    | : | 100     | 25.0    |   | 800    | 80.0    |        |         |        |         |
| KS    | : | 200     | 40.0    |   | 600    | 42.9    | 100    | 20.0    | 400    | 28.6    |
| KY    | : | 300     | 60.0    |   | 2,800  | 70.0    | 100    | 20.0    | 800    | 20.0    |

|    |   |       |      |        |      |       |      |        |      |
|----|---|-------|------|--------|------|-------|------|--------|------|
| LA | : |       | 900  | 81.8   |      |       | 100  | 9.1    |      |
| ME | : |       |      |        |      |       |      |        |      |
| MD | : |       |      |        |      |       |      |        |      |
| MA | : |       |      |        |      |       |      |        |      |
| MI | : |       |      |        |      |       |      |        |      |
| MN | : | 100   | 16.7 | 700    | 46.7 | 100   | 16.7 | 100    | 6.7  |
| MS | : | 300   | 50.0 | 1,300  | 72.2 | 100   | 16.7 | 300    | 16.7 |
| MO | : | 200   | 28.6 | 1,100  | 57.9 | 300   | 42.9 | 600    | 31.6 |
| MT | : |       |      | 1,100  | 61.1 |       |      | 200    | 11.1 |
| NE | : | 200   | 40.0 | 1,200  | 80.0 | 100   | 20.0 | 100    | 6.7  |
| NV | : |       |      | 1,100  | 84.6 |       |      | 100    | 7.7  |
| NH | : |       |      |        |      |       |      |        |      |
| NJ | : |       |      |        |      |       |      |        |      |
| NM | : | 200   | 33.3 | 1,200  | 60.0 |       |      | 100    | 5.0  |
| NY | : | 100   | 50.0 | 200    | 50.0 |       |      |        |      |
| NC | : |       |      |        |      |       |      | 700    | 87.5 |
| ND | : | 100   | 50.0 | 1,100  | 84.6 |       |      | 100    | 7.7  |
| OH | : |       |      | 100    | 20.0 |       |      | 200    | 40.0 |
| OK | : | 1,300 | 61.9 | 5,000  | 58.8 | 200   | 9.5  | 2,500  | 29.4 |
| OR | : | 100   | 33.3 | 3,300  | 75.0 |       |      | 500    | 11.4 |
| PA | : |       |      | 200    | 40.0 |       |      | 100    | 20.0 |
| RI | : |       |      |        |      |       |      |        |      |
| SC | : |       |      |        |      |       |      | 600    | 85.7 |
| SD | : | 200   | 50.0 | 2,000  | 83.3 | 100   | 25.0 | 200    | 8.3  |
| TN | : | 200   | 40.0 | 1,600  | 42.1 | 200   | 40.0 | 1,600  | 42.1 |
| TX | : | 1,500 | 37.5 | 19,000 | 76.0 | 500   | 12.5 | 3,500  | 14.0 |
| UT | : | 100   | 50.0 | 600    | 60.0 |       |      |        |      |
| VT | : |       |      |        |      |       |      |        |      |
| VA | : | 100   | 25.0 | 800    | 50.0 | 100   | 25.0 | 700    | 43.8 |
| WA | : |       |      | 800    | 80.0 |       |      | 100    | 10.0 |
| WV | : |       |      |        |      |       |      | 100    | 50.0 |
| WI | : |       |      | 500    | 50.0 |       |      | 200    | 20.0 |
| WY | : |       |      | 1,100  | 68.8 |       |      |        |      |
|    | : |       |      |        |      |       |      |        |      |
| US | : | 7,650 | 36.1 | 61,700 | 64.1 | 3,450 | 16.3 | 18,350 | 19.1 |

---

1/ Missing data are less than 100 head for the State or not published to avoid disclosure of individual operations. Data not published are included in U.S. total. Totals may not add due to rounding.

Losses of Cattle and Calves by Mountain Lions and Bobcats  
by Selected States and United States, 1995 1/

| : Mountain Lions and Bobcats |        |            |        |            |
|------------------------------|--------|------------|--------|------------|
| :-----                       |        |            |        |            |
| State                        | :      | Percent of | :      | Percent of |
|                              | Cattle | Total      | Calves | Total      |
|                              | :      | Predators  | :      | Predators  |
| :-----                       |        |            |        |            |
|                              | Head   | Percent    | Head   | Percent    |
|                              | :      |            |        |            |
| AZ                           | 300    | 33.3       | 1,500  | 45.5       |
| CA                           | 300    | 20.0       | 1,200  | 29.3       |
| CO                           |        |            | 200    | 5.7        |
| ID                           |        |            | 100    | 7.7        |
| KS                           |        |            | 100    | 7.1        |
| MT                           | 200    | 40.0       | 100    | 5.6        |
| NV                           |        |            |        |            |
| NM                           | 100    | 16.7       | 300    | 15.0       |
| OK                           |        |            | 200    | 2.4        |
| OR                           | 100    | 33.3       | 300    | 6.8        |
| TX                           | 500    | 12.5       | 2,000  | 8.0        |
| UT                           |        |            | 100    | 10.0       |
| VA                           |        |            |        |            |
| WY                           |        |            |        |            |
|                              |        |            |        |            |
| US                           | 1,750  | 8.3        | 6,300  | 6.5        |

1/ Missing data are less than 100 head for the State or not published to avoid disclosure of individual operations. Data not published are included in U.S. total. Totals may not add due to rounding.

Losses of Cattle and Calves by Other Predators  
by State and United States, 1995 1/

| : All Other Predators |        |            |        |            |
|-----------------------|--------|------------|--------|------------|
| :-----                |        |            |        |            |
| State                 | :      | Percent of | :      | Percent of |
|                       | Cattle | Total      | Calves | Total      |
|                       | :      | Predators  | :      | Predators  |
| :-----                |        |            |        |            |
|                       | Head   | Percent    | Head   | Percent    |
|                       | :      |            |        |            |
| AL                    | 100    | 25.0       | 100    | 3.7        |



|    |   |       |       |     |      |
|----|---|-------|-------|-----|------|
| AZ | : | 100   | 11.1  | 100 | 3.0  |
| AR | : | 200   | 50.0  | 200 | 11.8 |
| CA | : | 500   | 33.3  | 300 | 7.3  |
| CO | : | 200   | 50.0  | 200 | 5.7  |
| CT | : |       |       |     |      |
| DE | : |       |       |     |      |
| FL | : | 300   | 50.0  | 300 | 27.3 |
| GA | : | 100   | 33.3  | 100 | 7.1  |
| HI | : |       |       |     |      |
| ID | : | 100   | 33.3  | 300 | 23.1 |
| IL | : | 100   | 100.0 | 400 | 23.5 |
| IN | : |       |       |     |      |
| IA | : | 300   | 75.0  | 200 | 20.0 |
| KS | : | 200   | 40.0  | 300 | 21.4 |
| KY | : | 100   | 20.0  | 400 | 10.0 |
| LA | : | 100   | 50.0  | 100 | 9.1  |
| ME | : |       |       |     |      |
| MD | : |       |       |     |      |
| MA | : |       |       |     |      |
| MI | : | 100   | 50.0  | 100 | 50.0 |
| MN | : | 400   | 66.7  | 700 | 46.7 |
| MS | : | 200   | 33.3  | 200 | 11.1 |
| MO | : | 200   | 28.6  | 200 | 10.5 |
| MT | : | 200   | 40.0  | 400 | 22.2 |
| NE | : | 200   | 40.0  | 200 | 13.3 |
| NV | : |       |       |     |      |
| NH | : |       |       |     |      |
| NJ | : |       |       |     |      |
| NM | : | 300   | 50.0  | 400 | 20.0 |
| NY | : | 100   | 50.0  | 200 | 50.0 |
| NC | : | 400   | 100.0 | 100 | 12.5 |
| ND | : | 100   | 50.0  | 100 | 7.7  |
| OH | : | 100   | 50.0  | 200 | 40.0 |
| OK | : | 600   | 28.6  | 800 | 9.4  |
| OR | : | 100   | 33.3  | 300 | 6.8  |
| PA | : | 100   | 50.0  | 200 | 40.0 |
| RI | : |       |       |     |      |
| SC | : |       |       | 100 | 14.3 |
| SD | : | 100   | 25.0  | 200 | 8.3  |
| TN | : | 100   | 20.0  | 600 | 15.8 |
| TX | : | 1,500 | 37.5  | 500 | 2.0  |

|    |   |       |      |       |      |
|----|---|-------|------|-------|------|
| UT | : |       |      | 300   | 30.0 |
| VT | : |       |      |       |      |
| VA | : | 200   | 50.0 |       |      |
| WA | : | 100   | 50.0 | 100   | 10.0 |
| WV | : |       |      |       |      |
| WI | : | 500   | 83.3 | 300   | 30.0 |
| WY | : |       |      | 350   | 21.9 |
| :  | : |       |      |       |      |
| US | : | 8,350 | 39.4 | 9,850 | 10.2 |

1/ Missing data are less than 100 head for the State or not published to avoid disclosure of individual operations. Data not published are included in U.S. total. Totals may not add due to rounding.

Losses of Cattle and Calves by Digestive and Respiratory Problems,  
by State and United States, 1995 1/

|       | : | Digestive Problems |         |   |        | :       | Respiratory Problems |        |         |      |        |         |
|-------|---|--------------------|---------|---|--------|---------|----------------------|--------|---------|------|--------|---------|
| State | : | :                  | % of    | : | % of   | :       | :                    | % of   | :       | % of |        |         |
|       | : | Cattle             | Total   | : | Calves | Total   | :                    | Cattle | Total   | :    | Calves | Total   |
|       | : | :                  | Deaths  | : | :      | Deaths  | :                    | :      | Deaths  | :    | :      | Deaths  |
|       | : | Head               | Percent | : | Head   | Percent | :                    | Head   | Percent | :    | Head   | Percent |
| AL    | : | 1,100              | 4.1     | : | 6,600  | 14.0    | :                    | 5,400  | 20.0    | :    | 9,900  | 21.1    |
| AZ    | : | 3,300              | 11.0    | : | 7,000  | 23.3    | :                    | 4,500  | 15.0    | :    | 9,000  | 30.0    |
| AR    | : | 2,500              | 8.3     | : | 6,700  | 14.9    | :                    | 3,200  | 10.7    | :    | 13,500 | 30.0    |
| CA    | : | 18,700             | 20.8    | : | 41,000 | 30.4    | :                    | 23,600 | 26.2    | :    | 55,600 | 41.2    |
| CO    | : | 5,900              | 13.1    | : | 10,800 | 18.0    | :                    | 12,800 | 28.4    | :    | 14,900 | 24.8    |
| CT    | : | 100                | 10.0    | : | 300    | 30.0    | :                    | 200    | 20.0    | :    | 300    | 30.0    |
| DE    | : | 100                | 10.0    | : | 400    | 40.0    | :                    |        |         | :    | 200    | 20.0    |
| FL    | : | 1,300              | 4.3     | : | 9,100  | 20.7    | :                    | 2,000  | 6.7     | :    | 11,500 | 26.1    |
| GA    | : | 3,200              | 12.8    | : | 7,100  | 20.9    | :                    | 2,800  | 11.2    | :    | 6,500  | 19.1    |
| HI    | : | 300                | 7.5     | : | 400    | 10.0    | :                    | 300    | 7.5     | :    | 400    | 10.0    |
| ID    | : | 4,600              | 17.7    | : | 17,600 | 33.8    | :                    | 6,600  | 25.4    | :    | 12,700 | 24.4    |
| IL    | : | 2,400              | 9.6     | : | 11,000 | 24.4    | :                    | 7,000  | 28.0    | :    | 11,700 | 26.0    |
| IN    | : | 1,400              | 9.3     | : | 7,800  | 25.2    | :                    | 3,300  | 22.0    | :    | 10,300 | 33.2    |
| IA    | : | 8,700              | 15.0    | : | 26,800 | 23.3    | :                    | 21,500 | 37.1    | :    | 37,400 | 32.5    |
| KS    | : | 12,500             | 13.6    | : | 13,700 | 19.6    | :                    | 48,800 | 53.0    | :    | 28,100 | 40.1    |
| KY    | : | 3,400              | 7.6     | : | 16,100 | 18.9    | :                    | 4,600  | 10.2    | :    | 19,800 | 23.3    |
| LA    | : | 1,300              | 8.7     | : | 4,200  | 20.0    | :                    | 2,800  | 18.7    | :    | 5,700  | 27.1    |

|    |   |         |      |         |      |         |      |         |      |
|----|---|---------|------|---------|------|---------|------|---------|------|
| ME | : | 500     | 25.0 | 1,000   | 25.0 | 400     | 20.0 | 1,000   | 25.0 |
| MD | : | 400     | 8.0  | 2,400   | 34.3 | 700     | 14.0 | 2,000   | 28.6 |
| MA | : | 200     | 20.0 | 300     | 30.0 | 200     | 20.0 | 300     | 30.0 |
| MI | : | 3,500   | 14.0 | 23,600  | 39.3 | 7,100   | 28.4 | 17,800  | 29.7 |
| MN | : | 7,800   | 13.0 | 46,300  | 40.3 | 16,900  | 28.2 | 37,900  | 33.0 |
| MS | : | 3,500   | 10.0 | 7,200   | 17.1 | 3,700   | 10.6 | 12,900  | 30.7 |
| MO | : | 3,100   | 4.8  | 27,500  | 19.6 | 8,300   | 12.8 | 37,400  | 26.7 |
| MT | : | 2,600   | 11.3 | 10,000  | 17.5 | 3,600   | 15.7 | 8,600   | 15.1 |
| NE | : | 16,700  | 20.9 | 25,600  | 25.6 | 33,900  | 42.4 | 25,200  | 25.2 |
| NV | : | 900     | 15.0 | 3,100   | 25.8 | 1,500   | 25.0 | 3,400   | 28.3 |
| NH | : |         |      | 300     | 30.0 | 200     | 20.0 | 300     | 30.0 |
| NJ | : | 100     | 10.0 | 500     | 25.0 | 200     | 20.0 | 500     | 25.0 |
| NM | : | 3,200   | 14.5 | 8,500   | 23.6 | 3,900   | 17.7 | 10,900  | 30.3 |
| NY | : | 4,300   | 14.3 | 25,200  | 38.8 | 5,600   | 18.7 | 21,500  | 33.1 |
| NC | : | 1,400   | 7.4  | 6,300   | 21.0 | 3,400   | 17.9 | 5,800   | 19.3 |
| ND | : | 2,900   | 15.3 | 15,500  | 26.7 | 4,000   | 21.1 | 12,100  | 20.9 |
| OH | : | 5,100   | 21.3 | 14,700  | 28.3 | 4,600   | 19.2 | 14,000  | 26.9 |
| OK | : | 12,000  | 12.6 | 19,200  | 12.8 | 29,000  | 30.5 | 41,600  | 27.7 |
| OR | : | 3,600   | 12.9 | 12,000  | 24.0 | 5,000   | 17.9 | 16,600  | 33.2 |
| PA | : | 4,400   | 15.2 | 17,000  | 32.7 | 4,800   | 16.6 | 15,900  | 30.6 |
| RI | : |         |      | 100     | 33.3 |         |      | 100     | 33.3 |
| SC | : | 1,700   | 17.0 | 2,300   | 15.3 | 1,500   | 15.0 | 3,000   | 20.0 |
| SD | : | 6,800   | 11.3 | 37,000  | 22.4 | 14,300  | 23.8 | 30,000  | 18.2 |
| TN | : | 2,900   | 7.3  | 19,800  | 24.8 | 5,200   | 13.0 | 20,300  | 25.4 |
| TX | : | 19,400  | 8.1  | 31,600  | 11.7 | 80,900  | 33.7 | 85,500  | 31.7 |
| UT | : | 1,800   | 12.9 | 6,700   | 25.8 | 2,700   | 19.3 | 6,900   | 26.5 |
| VT | : | 500     | 10.0 | 2,600   | 26.0 | 1,100   | 22.0 | 3,000   | 30.0 |
| VA | : | 1,500   | 6.3  | 15,500  | 23.8 | 3,900   | 16.3 | 14,400  | 22.2 |
| WA | : | 5,500   | 25.0 | 6,800   | 23.4 | 4,500   | 20.5 | 10,000  | 34.5 |
| WV | : | 500     | 8.3  | 2,400   | 21.8 | 1,600   | 26.7 | 2,300   | 20.9 |
| WI | : | 7,600   | 10.9 | 82,300  | 43.3 | 13,800  | 19.7 | 69,600  | 36.6 |
| WY | : | 1,700   | 11.3 | 6,300   | 21.0 | 2,800   | 18.7 | 6,100   | 20.3 |
|    | : |         |      |         |      |         |      |         |      |
| US | : | 197,000 | 12.0 | 666,200 | 24.3 | 418,950 | 25.6 | 784,400 | 28.6 |

---

1/ Missing data are less than 100 head for the State or not published to avoid disclosure of individual operations. Data not published are included in U.S. total. Totals may not add due to rounding.

Losses of Cattle and Calves by Calving Problems and Weather,  
by State and United States, 1995 1/

---

| State | Calving Problems |         |            |         | Weather    |         |            |         |
|-------|------------------|---------|------------|---------|------------|---------|------------|---------|
|       | : % of           |         | : % of     |         | : % of     |         | : % of     |         |
|       | : Cattle         | : Total | : Calves   | : Total | : Cattle   | : Total | : Calves   | : Total |
|       | : : Deaths       | :       | : : Deaths | :       | : : Deaths | :       | : : Deaths | :       |
|       | : Head           | Percent | Head       | Percent | Head       | Percent | Head       | Percent |
| AL    | : 7,600          | 28.1    | 9,200      | 19.6    | 1,600      | 5.9     | 2,200      | 4.7     |
| AZ    | : 1,700          | 5.7     | 1,700      | 5.7     | 2,600      | 8.7     | 1,100      | 3.7     |
| AR    | : 7,500          | 25.0    | 9,900      | 22.0    | 2,600      | 8.7     | 4,000      | 8.9     |
| CA    | : 12,900         | 14.3    | 8,100      | 6.0     | 7,900      | 8.8     | 10,300     | 7.6     |
| CO    | : 3,100          | 6.9     | 7,400      | 12.3    | 2,700      | 6.0     | 7,100      | 11.8    |
| CT    | : 200            | 20.0    | 100        | 10.0    |            |         |            |         |
| DE    | :                |         |            |         | 100        | 10.0    |            |         |
| FL    | : 6,400          | 21.3    | 5,600      | 12.7    | 8,200      | 27.3    | 3,000      | 6.8     |
| GA    | : 7,600          | 30.4    | 8,300      | 24.4    | 1,400      | 5.6     | 900        | 2.6     |
| HI    | : 400            | 10.0    | 300        | 7.5     | 800        | 20.0    | 600        | 15.0    |
| ID    | : 2,900          | 11.2    | 5,900      | 11.3    | 1,000      | 3.8     | 4,100      | 7.9     |
| IL    | : 3,700          | 14.8    | 7,900      | 17.6    | 4,200      | 16.8    | 3,300      | 7.3     |
| IN    | : 2,100          | 14.0    | 4,000      | 12.9    | 1,600      | 10.7    | 2,500      | 8.1     |
| IA    | : 5,400          | 9.3     | 19,700     | 17.1    | 6,700      | 11.6    | 15,100     | 13.1    |
| KS    | : 4,000          | 4.3     | 10,200     | 14.6    | 6,300      | 6.8     | 7,500      | 10.7    |
| KY    | : 9,700          | 21.6    | 19,200     | 22.6    | 3,900      | 8.7     | 8,500      | 10.0    |
| LA    | : 3,400          | 22.7    | 3,300      | 15.7    | 1,400      | 9.3     | 2,100      | 10.0    |
| ME    | : 400            | 20.0    | 400        | 10.0    |            |         | 100        | 2.5     |
| MD    | : 1,000          | 20.0    | 1,200      | 17.1    | 700        | 14.0    | 100        | 1.4     |
| MA    | : 200            | 20.0    | 100        | 10.0    |            |         |            |         |
| MI    | : 4,500          | 18.0    | 8,300      | 13.8    | 1,700      | 6.8     | 2,000      | 3.3     |
| MN    | : 9,600          | 16.0    | 9,300      | 8.1     | 3,900      | 6.5     | 5,100      | 4.4     |
| MS    | : 6,700          | 19.1    | 7,500      | 17.9    | 2,200      | 6.3     | 1,600      | 3.8     |
| MO    | : 17,900         | 27.5    | 26,600     | 19.0    | 7,600      | 11.7    | 17,800     | 12.7    |
| MT    | : 2,000          | 8.7     | 13,900     | 24.4    | 2,700      | 11.7    | 13,100     | 23.0    |
| NE    | : 5,700          | 7.1     | 18,800     | 18.8    | 9,400      | 11.8    | 25,200     | 25.2    |
| NV    | : 800            | 13.3    | 1,900      | 15.8    | 600        | 10.0    | 400        | 3.3     |
| NH    | : 400            | 40.0    | 200        | 20.0    |            |         |            |         |
| NJ    | : 200            | 20.0    | 200        | 10.0    | 200        | 20.0    | 200        | 10.0    |
| NM    | : 4,700          | 21.4    | 3,700      | 10.3    | 1,600      | 7.3     | 3,700      | 10.3    |
| NY    | : 6,800          | 22.7    | 6,000      | 9.2     | 1,300      | 4.3     | 1,700      | 2.6     |
| NC    | : 6,200          | 32.6    | 6,200      | 20.7    | 1,000      | 5.3     | 1,000      | 3.3     |
| ND    | : 2,200          | 11.6    | 15,800     | 27.2    | 2,300      | 12.1    | 7,300      | 12.6    |

|    |   |         |      |         |      |         |      |         |      |
|----|---|---------|------|---------|------|---------|------|---------|------|
| OH | : | 3,700   | 15.4 | 13,000  | 25.0 | 1,200   | 5.0  | 1,800   | 3.5  |
| OK | : | 11,100  | 11.7 | 26,900  | 17.9 | 7,600   | 8.0  | 14,100  | 9.4  |
| OR | : | 5,500   | 19.6 | 7,400   | 14.8 | 400     | 1.4  | 3,000   | 6.0  |
| PA | : | 5,000   | 17.2 | 6,100   | 11.7 | 1,500   | 5.2  | 1,000   | 1.9  |
| RI | : |         |      |         |      |         |      |         |      |
| SC | : | 1,600   | 16.0 | 4,200   | 28.0 | 600     | 6.0  | 700     | 4.7  |
| SD | : | 5,500   | 9.2  | 16,700  | 10.1 | 13,000  | 21.7 | 72,000  | 43.6 |
| TN | : | 10,600  | 26.5 | 14,800  | 18.5 | 3,200   | 8.0  | 3,400   | 4.3  |
| TX | : | 28,900  | 12.0 | 27,700  | 10.3 | 8,200   | 3.4  | 13,800  | 5.1  |
| UT | : | 1,800   | 12.9 | 5,400   | 20.8 | 100     | .7   | 1,500   | 5.8  |
| VT | : | 800     | 16.0 | 1,200   | 12.0 | 200     | 4.0  | 700     | 7.0  |
| VA | : | 4,500   | 18.8 | 12,500  | 19.2 | 1,700   | 7.1  | 6,500   | 10.0 |
| WA | : | 3,400   | 15.5 | 4,700   | 16.2 | 200     | .9   | 1,000   | 3.4  |
| WV | : | 1,000   | 16.7 | 2,600   | 23.6 | 100     | 1.7  | 1,300   | 11.8 |
| WI | : | 13,500  | 19.3 | 10,300  | 5.4  | 5,700   | 8.1  | 6,300   | 3.3  |
| WY | : | 1,600   | 10.7 | 5,800   | 19.3 | 2,000   | 13.3 | 4,200   | 14.0 |
|    | : |         |      |         |      |         |      |         |      |
| US | : | 246,625 | 15.1 | 400,300 | 14.6 | 134,000 | 8.2  | 283,000 | 10.3 |

1/ Missing data are less than 100 head for the State or not published to avoid disclosure of individual operations. Data not published are included in U.S. total. Totals may not add due to rounding.

Losses of Cattle and Calves by Poison and Theft,  
by State and United States, 1995 1/

|       | : | Poison |         |        |         | :      | Theft   |        |         |   |
|-------|---|--------|---------|--------|---------|--------|---------|--------|---------|---|
|       | : |        |         |        |         | :      |         |        |         |   |
| State | : | :      | % of    | :      | :       | % of   | :       | :      | % of    | : |
|       | : | Cattle | Total   | Calves | Total   | Cattle | Total   | Calves | Total   |   |
|       | : | :      | Deaths  | :      | Deaths  | :      | Deaths  | :      | Deaths  |   |
|       | : | Head   | Percent | Head   | Percent | Head   | Percent | Head   | Percent |   |
| AL    | : | 500    | 1.9     | 600    | 1.3     | 100    | .4      | 200    | .4      |   |
| AZ    | : | 700    | 2.3     | 200    | .7      | 100    | .3      | 100    | .3      |   |
| AR    | : | 1,100  | 3.7     | 300    | .7      | 100    | .3      | 100    | .2      |   |
| CA    | : | 500    | .6      | 100    | .1      | 900    | 1.0     | 1,100  | .8      |   |
| CO    | : | 900    | 2.0     | 700    | 1.2     | 200    | .4      | 300    | .5      |   |
| CT    | : | 100    | 10.0    |        |         |        |         |        |         |   |
| DE    | : |        |         |        |         |        |         |        |         |   |
| FL    | : | 300    | 1.0     | 200    | .5      | 400    | 1.3     | 100    | .2      |   |

|    |   |       |     |       |     |     |     |       |     |
|----|---|-------|-----|-------|-----|-----|-----|-------|-----|
| GA | : | 1,800 | 7.2 | 600   | 1.8 | 100 | .4  | 200   | .6  |
| HI | : |       |     |       |     |     |     |       |     |
| ID | : | 700   | 2.7 | 200   | .4  | 300 | 1.2 | 200   | .4  |
| IL | : | 300   | 1.2 | 100   | .2  | 100 | .4  | 300   | .7  |
| IN | : | 300   | 2.0 | 400   | 1.3 | 100 | .7  | 400   | 1.3 |
| IA | : | 600   | 1.0 | 100   | .1  | 300 | .5  | 1,200 | 1.0 |
| KS | : | 1,000 | 1.1 | 100   | .1  | 600 | .7  | 400   | .6  |
| KY | : | 2,500 | 5.6 | 600   | .7  | 200 | .4  | 100   | .1  |
| LA | : | 300   | 2.0 | 200   | 1.0 | 100 | .7  | 200   | 1.0 |
| ME | : |       |     |       |     |     |     |       |     |
| MD | : |       |     |       |     |     |     |       |     |
| MA | : |       |     |       |     |     |     |       |     |
| MI | : | 200   | .8  | 100   | .2  |     |     | 100   | .2  |
| MN | : | 600   | 1.0 | 100   | .1  |     |     | 100   | .1  |
| MS | : | 800   | 2.3 | 400   | 1.0 |     |     |       |     |
| MO | : | 1,100 | 1.7 | 900   | .6  | 500 | .8  | 800   | .6  |
| MT | : | 800   | 3.5 | 900   | 1.6 |     |     | 200   | .4  |
| NE | : | 600   | .8  | 500   | .5  | 200 | .3  | 100   | .1  |
| NV | : | 200   | 3.3 |       |     |     |     |       |     |
| NH | : |       |     |       |     |     |     |       |     |
| NJ | : |       |     |       |     |     |     |       |     |
| NM | : | 1,300 | 5.9 | 600   | 1.7 | 600 | 2.7 | 300   | .8  |
| NY | : | 500   | 1.7 | 100   | .2  | 200 | .7  | 100   | .2  |
| NC | : | 400   | 2.1 | 100   | .3  | 100 | .5  |       |     |
| ND | : | 200   | 1.1 | 100   | .2  | 100 | .5  | 100   | .2  |
| OH | : | 600   | 2.5 | 100   | .2  |     |     | 100   | .2  |
| OK | : | 3,600 | 3.8 | 1,400 | .9  | 800 | .8  | 600   | .4  |
| OR | : | 1,500 | 5.4 | 300   | .6  | 300 | 1.1 | 400   | .8  |
| PA | : | 400   | 1.4 | 400   | .8  | 100 | .3  | 100   | .2  |
| RI | : |       |     |       |     |     |     |       |     |
| SC | : | 200   | 2.0 | 700   | 4.7 |     |     |       |     |
| SD | : | 1,000 | 1.7 | 200   | .1  | 200 | .3  | 200   | .1  |
| TN | : | 600   | 1.5 | 900   | 1.1 | 100 | .3  | 400   | .5  |
| TX | : | 2,400 | 1.0 | 2,700 | 1.0 | 700 | .3  | 2,700 | 1.0 |
| UT | : | 700   | 5.0 | 400   | 1.5 | 100 | .7  |       |     |
| VT | : | 200   | 4.0 | 300   | 3.0 |     |     |       |     |
| VA | : | 600   | 2.5 | 100   | .2  |     |     |       |     |
| WA | : | 400   | 1.8 | 100   | .3  |     |     | 100   | .3  |
| WV | : | 300   | 5.0 |       |     |     |     |       |     |
| WI | : | 800   | 1.1 | 400   | .2  | 100 | .1  | 100   | .1  |
| WY | : | 800   | 5.3 | 500   | 1.7 | 200 | 1.3 | 200   | .7  |

|    |   |        |     |        |    |       |    |        |    |
|----|---|--------|-----|--------|----|-------|----|--------|----|
| US | : | 32,500 | 2.0 | 16,800 | .6 | 8,000 | .5 | 11,700 | .4 |
|----|---|--------|-----|--------|----|-------|----|--------|----|

1/ Missing data are less than 100 head for the State or not published to avoid disclosure of individual operations. Data not published are included in U.S. total. Totals may not add due to rounding.

Losses of Cattle and Calves by Other and Unknown Causes,  
by State and United States, 1995 1/

|       |   | Other    |         |          |         | Unknown  |         |          |         |
|-------|---|----------|---------|----------|---------|----------|---------|----------|---------|
| State |   | : % of   |         | : % of   |         | : % of   |         | : % of   |         |
|       |   | : Cattle |         | : Calves |         | : Cattle |         | : Calves |         |
|       |   | : Deaths |         | : Deaths |         | : Deaths |         | : Deaths |         |
|       |   | Head     | Percent | Head     | Percent | Head     | Percent | Head     | Percent |
| AL    | : | 4,800    | 17.8    | 3,300    | 7.0     | 5,500    | 20.4    | 12,300   | 26.2    |
| AZ    | : | 2,400    | 8.0     | 700      | 2.3     | 13,800   | 46.0    | 6,900    | 23.0    |
| AR    | : | 6,300    | 21.0    | 4,000    | 8.9     | 6,300    | 21.0    | 4,800    | 10.7    |
| CA    | : | 11,800   | 13.1    | 3,600    | 2.7     | 12,200   | 13.6    | 11,100   | 8.2     |
| CO    | : | 4,900    | 10.9    | 2,500    | 4.2     | 14,100   | 31.3    | 12,800   | 21.3    |
| CT    | : | 200      | 20.0    |          |         | 200      | 20.0    | 200      | 20.0    |
| DE    | : | 100      | 10.0    |          |         | 300      | 30.0    | 200      | 20.0    |
| FL    | : | 6,200    | 20.7    | 2,300    | 5.2     | 4,600    | 15.3    | 11,100   | 25.2    |
| GA    | : | 4,400    | 17.6    | 2,100    | 6.2     | 3,400    | 13.6    | 6,900    | 20.3    |
| HI    | : | 700      | 17.5    | 600      | 15.0    | 1,400    | 35.0    | 1,400    | 35.0    |
| ID    | : | 4,400    | 16.9    | 3,300    | 6.3     | 5,200    | 20.0    | 6,700    | 12.9    |
| IL    | : | 3,900    | 15.6    | 1,700    | 3.8     | 3,300    | 13.2    | 7,300    | 16.2    |
| IN    | : | 2,100    | 14.0    | 1,600    | 5.2     | 3,900    | 26.0    | 3,300    | 10.6    |
| IA    | : | 8,000    | 13.8    | 4,900    | 4.3     | 6,400    | 11.0    | 8,800    | 7.7     |
| KS    | : | 5,500    | 6.0     | 1,500    | 2.1     | 12,800   | 13.9    | 7,100    | 10.1    |
| KY    | : | 9,200    | 20.4    | 5,100    | 6.0     | 11,000   | 24.4    | 11,600   | 13.6    |
| LA    | : | 2,900    | 19.3    | 1,700    | 8.1     | 2,600    | 17.3    | 2,500    | 11.9    |
| ME    | : | 300      | 15.0    | 500      | 12.5    | 400      | 20.0    | 925      | 23.1    |
| MD    | : | 1,100    | 22.0    | 500      | 7.1     | 1,025    | 20.5    | 725      | 10.4    |
| MA    | : | 200      | 20.0    | 100      | 10.0    | 125      | 12.5    |          |         |
| MI    | : | 4,500    | 18.0    | 2,200    | 3.7     | 3,300    | 13.2    | 5,700    | 9.5     |
| MN    | : | 11,300   | 18.8    | 3,900    | 3.4     | 9,300    | 15.5    | 10,800   | 9.4     |
| MS    | : | 6,100    | 17.4    | 4,500    | 10.7    | 11,400   | 32.6    | 6,100    | 14.5    |
| MO    | : | 14,200   | 21.8    | 12,600   | 9.0     | 11,600   | 17.8    | 14,500   | 10.4    |

|    |   |         |      |         |      |         |      |         |      |
|----|---|---------|------|---------|------|---------|------|---------|------|
| MT | : | 5,000   | 21.7 | 3,600   | 6.3  | 5,800   | 25.2 | 4,900   | 8.6  |
| NE | : | 7,400   | 9.3  | 1,200   | 1.2  | 5,600   | 7.0  | 1,900   | 1.9  |
| NV | : | 900     | 15.0 | 800     | 6.7  | 800     | 13.3 | 1,100   | 9.2  |
| NH | : | 100     | 10.0 |         |      | 100     | 10.0 | 200     | 20.0 |
| NJ | : |         |      | 100     | 5.0  |         |      | 500     | 25.0 |
| NM | : | 2,600   | 11.8 | 1,600   | 4.4  | 3,500   | 15.9 | 4,700   | 13.1 |
| NY | : | 6,100   | 20.3 | 2,600   | 4.0  | 5,000   | 16.7 | 7,400   | 11.4 |
| NC | : | 3,400   | 17.9 | 2,700   | 9.0  | 2,700   | 14.2 | 7,100   | 23.7 |
| ND | : | 3,300   | 17.4 | 1,700   | 2.9  | 3,800   | 20.0 | 4,100   | 7.1  |
| OH | : | 5,400   | 22.5 | 2,600   | 5.0  | 3,200   | 13.3 | 5,200   | 10.0 |
| OK | : | 10,100  | 10.6 | 5,400   | 3.6  | 18,700  | 19.7 | 32,300  | 21.5 |
| OR | : | 5,900   | 21.1 | 1,400   | 2.8  | 5,500   | 19.6 | 4,500   | 9.0  |
| PA | : | 7,500   | 25.9 | 5,100   | 9.8  | 5,100   | 17.6 | 5,900   | 11.3 |
| RI | : |         |      | 100     | 33.3 |         |      |         |      |
| SC | : | 1,900   | 19.0 | 2,100   | 14.0 | 2,400   | 24.0 | 1,300   | 8.7  |
| SD | : | 8,500   | 14.2 | 1,500   | .9   | 10,300  | 17.2 | 5,000   | 3.0  |
| TN | : | 8,700   | 21.8 | 5,800   | 7.3  | 8,200   | 20.5 | 10,800  | 13.5 |
| TX | : | 43,100  | 18.0 | 18,400  | 6.8  | 52,400  | 21.8 | 62,600  | 23.2 |
| UT | : | 2,500   | 17.9 | 1,100   | 4.2  | 4,100   | 29.3 | 3,000   | 11.5 |
| VT | : | 1,200   | 24.0 | 1,200   | 12.0 | 925     | 18.5 | 925     | 9.3  |
| VA | : | 4,900   | 20.4 | 3,300   | 5.1  | 6,500   | 27.1 | 11,100  | 17.1 |
| WA | : | 3,500   | 15.9 | 2,400   | 8.3  | 4,300   | 19.5 | 2,900   | 10.0 |
| WV | : | 1,425   | 23.8 | 1,200   | 10.9 | 1,000   | 16.7 | 900     | 8.2  |
| WI | : | 11,600  | 16.6 | 5,300   | 2.8  | 16,300  | 23.3 | 14,700  | 7.7  |
| WY | : | 2,700   | 18.0 | 1,300   | 4.3  | 3,000   | 20.0 | 4,000   | 13.3 |
| :  | : |         |      |         |      |         |      |         |      |
| US | : | 263,350 | 16.1 | 135,800 | 4.9  | 313,475 | 19.2 | 350,900 | 12.8 |

1/ Missing data are less than 100 head for the State or not published to avoid disclosure of individual operations. Data not published are included in U.S. total. Totals may not add due to rounding.

Losses and Value of Losses of Cattle by Predators, Other Causes,  
and Total, by State and United States, 1995 1/

|        | : | Total | : | Predators | : | Other Causes |
|--------|---|-------|---|-----------|---|--------------|
| State: | : | Value | : | :         | : | :            |
| :      | : | Per   | : | Losses    | : | Losses       |
| :      | : | Head  | : | :         | : | :            |
| :      | : | Total | : | Total     | : | Total        |
| :      | : | Value | : | Value     | : | Value        |



|    | : | Head   | Dollars | 1,000 Dol | Head  | 1,000 Dol | Head   | 1,000 Dol |
|----|---|--------|---------|-----------|-------|-----------|--------|-----------|
| AL | : | 27,000 | 500     | 13,500    | 400   | 200       | 26,600 | 13,300    |
| AZ | : | 30,000 | 643     | 19,290    | 900   | 579       | 29,100 | 18,711    |
| AR | : | 30,000 | 548     | 16,440    | 400   | 219       | 29,600 | 16,221    |
| CA | : | 90,000 | 823     | 74,070    | 1,500 | 1,235     | 88,500 | 72,836    |
| CO | : | 45,000 | 605     | 27,225    | 400   | 242       | 44,600 | 26,983    |
| CT | : | 1,000  | 915     | 915       |       |           | 1,000  | 915       |
| DE | : | 1,000  | 873     | 873       |       |           | 1,000  | 873       |
| FL | : | 30,000 | 595     | 17,850    | 600   | 357       | 29,400 | 17,493    |
| GA | : | 25,000 | 583     | 14,575    | 300   | 175       | 24,700 | 14,400    |
| HI | : | 4,000  | 495     | 1,980     | 100   | 50        | 3,900  | 1,931     |
| ID | : | 26,000 | 655     | 17,030    | 300   | 197       | 25,700 | 16,834    |
| IL | : | 25,000 | 630     | 15,750    | 100   | 63        | 24,900 | 15,687    |
| IN | : | 15,000 | 673     | 10,095    | 200   | 135       | 14,800 | 9,960     |
| IA | : | 58,000 | 630     | 36,540    | 400   | 252       | 57,600 | 36,288    |
| KS | : | 92,000 | 520     | 47,840    | 500   | 260       | 91,500 | 47,580    |
| KY | : | 45,000 | 578     | 26,010    | 500   | 289       | 44,500 | 25,721    |
| LA | : | 15,000 | 593     | 8,895     | 200   | 119       | 14,800 | 8,776     |
| ME | : | 2,000  | 813     | 1,626     |       |           | 2,000  | 1,626     |
| MD | : | 5,000  | 808     | 4,040     | 75    | 61        | 4,925  | 3,979     |
| MA | : | 1,000  | 890     | 890       | 75    | 67        | 925    | 823       |
| MI | : | 25,000 | 818     | 20,450    | 200   | 164       | 24,800 | 20,286    |
| MN | : | 60,000 | 720     | 43,200    | 600   | 432       | 59,400 | 42,768    |
| MS | : | 35,000 | 513     | 17,955    | 600   | 308       | 34,400 | 17,647    |
| MO | : | 65,000 | 580     | 37,700    | 700   | 406       | 64,300 | 37,294    |
| MT | : | 23,000 | 630     | 14,490    | 500   | 315       | 22,500 | 14,175    |
| NE | : | 80,000 | 583     | 46,640    | 500   | 292       | 79,500 | 46,349    |
| NV | : | 6,000  | 585     | 3,510     | 200   | 117       | 5,800  | 3,393     |
| NH | : | 1,000  | 893     | 893       |       |           | 1,000  | 893       |
| NJ | : | 1,000  | 905     | 905       |       |           | 1,000  | 905       |
| NM | : | 22,000 | 658     | 14,476    | 600   | 395       | 21,400 | 14,081    |
| NY | : | 30,000 | 893     | 26,790    | 200   | 179       | 29,800 | 26,611    |
| NC | : | 19,000 | 548     | 10,412    | 400   | 219       | 18,600 | 10,193    |
| ND | : | 19,000 | 643     | 12,217    | 200   | 129       | 18,800 | 12,088    |
| OH | : | 24,000 | 713     | 17,112    | 200   | 143       | 23,800 | 16,969    |
| OK | : | 95,000 | 518     | 49,210    | 2,100 | 1,088     | 92,900 | 48,122    |
| OR | : | 28,000 | 620     | 17,360    | 300   | 186       | 27,700 | 17,174    |
| PA | : | 29,000 | 873     | 25,317    | 200   | 175       | 28,800 | 25,142    |
| RI | : | 100    | 810     | 81        |       |           | 100    | 81        |
| SC | : | 10,000 | 563     | 5,630     | 100   | 56        | 9,900  | 5,574     |

|    |   |           |     |           |        |        |           |           |
|----|---|-----------|-----|-----------|--------|--------|-----------|-----------|
| SD | : | 60,000    | 610 | 36,600    | 400    | 244    | 59,600    | 36,356    |
| TN | : | 40,000    | 550 | 22,000    | 500    | 275    | 39,500    | 21,725    |
| TX | : | 240,000   | 543 | 130,320   | 4,000  | 2,172  | 236,000   | 128,148   |
| UT | : | 14,000    | 635 | 8,890     | 200    | 127    | 13,800    | 8,763     |
| VT | : | 5,000     | 968 | 4,840     | 75     | 73     | 4,925     | 4,767     |
| VA | : | 24,000    | 595 | 14,280    | 400    | 238    | 23,600    | 14,042    |
| WA | : | 22,000    | 745 | 16,390    | 200    | 149    | 21,800    | 16,241    |
| WV | : | 6,000     | 508 | 3,048     | 75     | 38     | 5,925     | 3,010     |
| WI | : | 70,000    | 855 | 59,850    | 600    | 513    | 69,400    | 59,337    |
| WY | : | 15,000    | 628 | 9,420     | 200    | 126    | 14,800    | 9,294     |
| :  | : |           |     |           |        |        |           |           |
| US | : | 1,635,100 |     | 1,025,420 | 21,200 | 13,053 | 1,613,900 | 1,012,367 |

1/ Missing predator loss data are included with other causes to avoid disclosure of individual operations.

Losses and Value of Losses of Calves by Predators, Other Causes,  
and Total, by State and United States, 1995 1/

|        | : | Total   | : | Predators | : | Other Causes | : |
|--------|---|---------|---|-----------|---|--------------|---|
| State: | : | Value   | : |           | : |              | : |
| :      | : | Per     | : | Losses    | : | Losses       | : |
| :      | : | Head    | : |           | : |              | : |
| :      | : | Value   | : |           | : |              | : |
| :      | : |         | : |           | : |              | : |
| :      | : | Head    | : | Head      | : | Head         | : |
| :      | : | Dollars | : | 1,000 Dol | : | 1,000 Dol    | : |
| AL     | : | 47,000  | : | 245       | : | 11,515       | : |
| AZ     | : | 30,000  | : | 230       | : | 6,900        | : |
| AR     | : | 45,000  | : | 278       | : | 12,510       | : |
| CA     | : | 135,000 | : | 250       | : | 33,750       | : |
| CO     | : | 60,000  | : | 345       | : | 20,700       | : |
| CT     | : | 1,000   | : | 295       | : | 295          | : |
| DE     | : | 1,000   | : | 385       | : | 385          | : |
| FL     | : | 44,000  | : | 235       | : | 10,340       | : |
| GA     | : | 34,000  | : | 248       | : | 8,432        | : |
| HI     | : | 4,000   | : | 220       | : | 880          | : |
| ID     | : | 52,000  | : | 273       | : | 14,196       | : |
| IL     | : | 45,000  | : | 293       | : | 13,185       | : |
| IN     | : | 31,000  | : | 285       | : | 8,835        | : |
| IA     | : | 115,000 | : | 318       | : | 36,570       | : |

|    |   |           |     |         |        |        |           |         |
|----|---|-----------|-----|---------|--------|--------|-----------|---------|
| KS | : | 70,000    | 295 | 20,650  | 1,400  | 413    | 68,600    | 20,237  |
| KY | : | 85,000    | 263 | 22,355  | 4,000  | 1,052  | 81,000    | 21,303  |
| LA | : | 21,000    | 260 | 5,460   | 1,100  | 286    | 19,900    | 5,174   |
| ME | : | 4,000     | 273 | 1,092   | 75     | 20     | 3,925     | 1,072   |
| MD | : | 7,000     | 325 | 2,275   | 75     | 24     | 6,925     | 2,251   |
| MA | : | 1,000     | 288 | 288     | 75     | 22     | 925       | 266     |
| MI | : | 60,000    | 273 | 16,380  | 200    | 55     | 59,800    | 16,325  |
| MN | : | 115,000   | 275 | 31,625  | 1,500  | 413    | 113,500   | 31,213  |
| MS | : | 42,000    | 223 | 9,366   | 1,800  | 401    | 40,200    | 8,965   |
| MO | : | 140,000   | 268 | 37,520  | 1,900  | 509    | 138,100   | 37,011  |
| MT | : | 57,000    | 350 | 19,950  | 1,800  | 630    | 55,200    | 19,320  |
| NE | : | 100,000   | 330 | 33,000  | 1,500  | 495    | 98,500    | 32,505  |
| NV | : | 12,000    | 310 | 3,720   | 1,300  | 403    | 10,700    | 3,317   |
| NH | : | 1,000     | 315 | 315     |        |        | 1,000     | 315     |
| NJ | : | 2,000     | 295 | 590     |        |        | 2,000     | 590     |
| NM | : | 36,000    | 285 | 10,260  | 2,000  | 570    | 34,000    | 9,690   |
| NY | : | 65,000    | 308 | 20,020  | 400    | 123    | 64,600    | 19,897  |
| NC | : | 30,000    | 223 | 6,690   | 800    | 178    | 29,200    | 6,512   |
| ND | : | 58,000    | 335 | 19,430  | 1,300  | 436    | 56,700    | 18,995  |
| OH | : | 52,000    | 298 | 15,496  | 500    | 149    | 51,500    | 15,347  |
| OK | : | 150,000   | 275 | 41,250  | 8,500  | 2,338  | 141,500   | 38,913  |
| OR | : | 50,000    | 305 | 15,250  | 4,400  | 1,342  | 45,600    | 13,908  |
| PA | : | 52,000    | 275 | 14,300  | 500    | 138    | 51,500    | 14,163  |
| RI | : | 300       | 295 | 89      |        |        | 300       | 89      |
| SC | : | 15,000    | 260 | 3,900   | 700    | 182    | 14,300    | 3,718   |
| SD | : | 165,000   | 330 | 54,450  | 2,400  | 792    | 162,600   | 53,658  |
| TN | : | 80,000    | 240 | 19,200  | 3,800  | 912    | 76,200    | 18,288  |
| TX | : | 270,000   | 265 | 71,550  | 25,000 | 6,625  | 245,000   | 64,925  |
| UT | : | 26,000    | 290 | 7,540   | 1,000  | 290    | 25,000    | 7,250   |
| VT | : | 10,000    | 310 | 3,100   | 75     | 23     | 9,925     | 3,077   |
| VA | : | 65,000    | 228 | 14,820  | 1,600  | 365    | 63,400    | 14,455  |
| WA | : | 29,000    | 275 | 7,975   | 1,000  | 275    | 28,000    | 7,700   |
| WV | : | 11,000    | 253 | 2,783   | 200    | 51     | 10,800    | 2,732   |
| WI | : | 190,000   | 285 | 54,150  | 1,000  | 285    | 189,000   | 53,865  |
| WY | : | 30,000    | 355 | 10,650  | 1,600  | 568    | 28,400    | 10,082  |
|    | : |           |     |         |        |        |           |         |
| US | : | 2,745,300 |     | 775,982 | 96,200 | 26,510 | 2,649,100 | 749,472 |

---

1/ Missing predator loss data are included with other causes to avoid disclosure of individual operations.

Losses of Cattle and Calves by Cause and Total Value,  
by Region and United States, 1995 1/

| Region                         | Total Predators Losses |           |             | Total Non-Predator Losses |           |             |
|--------------------------------|------------------------|-----------|-------------|---------------------------|-----------|-------------|
|                                | Cattle                 | Calves    | Total Value | Cattle                    | Calves    | Total Value |
|                                | Head                   | Head      | 1,000 Dol   | Head                      | Head      | 1,000 Dol   |
| Mountain and West              | 13,100                 | 65,600    | 26,466      | 897,900                   | 1,268,400 | 912,593     |
| Midwest                        | 3,400                  | 10,200    | 5,225       | 368,600                   | 782,800   | 478,184     |
| South and East                 | 4,700                  | 20,400    | 7,872       | 347,400                   | 597,900   | 371,063     |
| US                             | 21,200                 | 96,200    | 39,562      | 1,613,900                 | 2,649,100 | 1,761,839   |
|                                | Total Losses           |           |             |                           |           |             |
|                                | Cattle                 | Calves    | Total Value |                           |           |             |
|                                | Head                   | Head      | 1,000 Dol   |                           |           |             |
| Mountain and West              | 911,000                | 1,334,000 | 939,059     |                           |           |             |
| Midwest                        | 372,000                | 793,000   | 483,408     |                           |           |             |
| South and East                 | 352,100                | 618,300   | 378,935     |                           |           |             |
| US                             | 1,635,100              | 2,745,300 | 1,801,402   |                           |           |             |
| See footnotes at end of table. |                        |           |             |                           |           | --continued |

Losses of Cattle and Calves by Cause and Total Value,  
by Regions and United States, 1995 2/ (Continued)

|  | Coyotes | Dogs |
|--|---------|------|
|--|---------|------|

| Region            |                            |        |             |                 |        |             |
|-------------------|----------------------------|--------|-------------|-----------------|--------|-------------|
|                   | Cattle                     | Calves | Total Value | Cattle          | Calves | Total Value |
|                   | Head                       |        | 1,000 Dol   | Head            |        | 1,000 Dol   |
| Mountain and West | 5,200                      | 45,300 | 16,020      | 1,700           | 9,150  | 3,537       |
| Midwest           | 750                        | 5,250  | 1,994       | 700             | 2,600  | 1,182       |
| South and East    | 1,700                      | 11,150 | 3,784       | 1,050           | 6,600  | 2,234       |
| US                | 7,650                      | 61,700 | 21,798      | 3,450           | 18,350 | 6,952       |
|                   | Mountain Lions and Bobcats |        |             | Bears           |        |             |
|                   | Cattle                     | Calves | Total Value | Cattle          | Calves | Total Value |
|                   | Head                       |        | 1,000 Dol   | Head            |        | 1,000 Dol   |
| Mountain and West | 1,750                      | 6,250  | 2,768       | 400             | 1,200  | 655         |
| Midwest           |                            |        |             | 200             |        | 158         |
| South and East    |                            |        |             |                 |        |             |
| US                | 1,750                      | 6,300  | 2,780       | 600             | 1,200  | 813         |
|                   | Wolves                     |        |             | Other Predators |        |             |
|                   | Cattle                     | Calves | Total Value | Cattle          | Calves | Total Value |
|                   | Head                       |        | 1,000 Dol   | Head            |        | 1,000 Dol   |
| Mountain and West | 400                        | 1,100  | 531         | 3,650           | 2,600  | 2,955       |
| Midwest           | 200                        | 600    | 310         | 1,550           | 1,750  | 1,581       |

|                                |   |     |       |             |       |       |
|--------------------------------|---|-----|-------|-------------|-------|-------|
|                                | : |     |       |             |       |       |
| South and                      | : |     |       |             |       |       |
| East                           | : | 200 | 50    | 1,950       | 2,400 | 1,792 |
|                                | : |     |       |             |       |       |
| US                             | : | 600 | 1,900 | 891         | 7,150 | 6,750 |
|                                | : |     |       |             |       | 6,328 |
| -----                          |   |     |       |             |       |       |
| See footnotes at end of table. |   |     |       | --continued |       |       |

Losses of Cattle and Calves by Cause and Total Value,  
by Regions and United States, 1995 1/ (Continued)

|           |   |                    |          |              |     |                      |          |              |
|-----------|---|--------------------|----------|--------------|-----|----------------------|----------|--------------|
|           | : | Digestive Problems |          |              | :   | Respiratory Problems |          |              |
| Region    | : | -----              |          |              |     |                      |          |              |
|           | : | Cattle             | : Calves | :Total Value | :   | Cattle               | : Calves | :Total Value |
|           | : | -----              |          |              |     |                      |          |              |
|           | : | -----              | Head     | -----        |     | -----                | Head     | -----        |
|           | : |                    |          | 1,000        | Dol |                      |          | 1,000        |
|           | : |                    |          |              |     |                      |          | Dol          |
| Mountain  | : |                    |          |              |     |                      |          |              |
| and West  | : | 122,400            | 272,800  | 156,670      |     | 282,700              | 377,600  | 274,026      |
|           | : |                    |          |              |     |                      |          |              |
| Midwest   | : | 42,100             | 246,700  | 99,929       |     | 85,700               | 249,600  | 131,121      |
|           | : |                    |          |              |     |                      |          |              |
| South and | : |                    |          |              |     |                      |          |              |
| East      | : | 32,500             | 146,700  | 59,858       |     | 50,550               | 157,200  | 73,011       |
|           | : |                    |          |              |     |                      |          |              |
| US        | : | 197,000            | 666,200  | 316,457      |     | 418,950              | 784,400  | 478,158      |
|           | : | -----              |          |              |     |                      |          |              |
|           | : | Calving Problems   |          |              | :   | Weather              |          |              |
|           | : | -----              |          |              |     |                      |          |              |
|           | : | Cattle             | : Calves | :Total Value | :   | Cattle               | : Calves | :Total Value |
|           | : | -----              |          |              |     |                      |          |              |
|           | : | -----              | Head     | -----        |     | -----                | Head     | -----        |
|           | : |                    |          | 1,000        | Dol |                      |          | 1,000        |
|           | : |                    |          |              |     |                      |          | Dol          |
| Mountain  | : |                    |          |              |     |                      |          |              |
| and West  | : | 98,200             | 182,300  | 115,293      |     | 69,400               | 190,000  | 101,911      |
|           | : |                    |          |              |     |                      |          |              |
| Midwest   | : | 67,900             | 109,000  | 77,645       |     | 35,200               | 57,900   | 40,348       |
|           | : |                    |          |              |     |                      |          |              |
| South and | : |                    |          |              |     |                      |          |              |
| East      | : | 80,525             | 109,000  | 77,210       |     | 29,400               | 35,100   | 26,814       |
|           | : |                    |          |              |     |                      |          |              |

|    |   |         |         |         |         |         |         |
|----|---|---------|---------|---------|---------|---------|---------|
| US | : | 246,625 | 400,300 | 270,148 | 134,000 | 283,000 | 169,073 |
|----|---|---------|---------|---------|---------|---------|---------|

See footnotes at end of table.

--continued

Losses of Cattle and Calves by Cause and Total Value,  
by Regions and United States, 1995 1/ (Continued)

| Region            | Poison       |         |             | Theft          |         |             |
|-------------------|--------------|---------|-------------|----------------|---------|-------------|
|                   | Cattle       | Calves  | Total Value | Cattle         | Calves  | Total Value |
|                   | Head         | Head    | 1,000 Dol   | Head           | Head    | 1,000 Dol   |
| Mountain and West | 17,300       | 9,000   | 12,952      | 5,400          | 7,100   | 5,345       |
| Midwest           | 5,600        | 2,500   | 4,415       | 1,200          | 3,200   | 1,688       |
| South and East    | 9,600        | 5,300   | 7,198       | 1,400          | 1,400   | 1,252       |
| US                | 32,500       | 16,800  | 24,566      | 8,000          | 11,700  | 8,285       |
|                   | Other Causes |         |             | Unknown Causes |         |             |
|                   | Cattle       | Calves  | Total Value | Cattle         | Calves  | Total Value |
|                   | Head         | Head    | 1,000 Dol   | Head           | Head    | 1,000 Dol   |
| Mountain and West | 125,200      | 52,600  | 90,552      | 177,300        | 177,000 | 155,844     |
| Midwest           | 67,300       | 38,800  | 57,143      | 63,600         | 75,100  | 65,893      |
| South and East    | 70,850       | 44,400  | 56,360      | 72,575         | 98,800  | 69,361      |
| US                | 263,350      | 135,800 | 204,055     | 313,475        | 350,900 | 291,097     |

1/ Totals may not add due to rounding.

2/ Missing data are less than 100 head for the Region or not published to avoid

disclosure of individual operations. Data not published are included in U.S. total. Totals may not add due to rounding.

#### Reliability of Cattle and Calf Death Loss Estimates

**Survey Procedures:** A random sample of U.S. producers was surveyed to provide data for these estimates. Survey procedures ensured that all cattle producers, regardless of size, had a chance to be included in the survey to collect death loss by cause. Large producers were sampled more heavily than small operations. Data were collected from about 50,000 operators during the first half of January by mail, telephone, and face-to-face personal interviews. Operators were asked to report death losses for cattle and calves for the 1995 calendar year.

**Estimating Procedures:** These estimates of total death losses and death loss by cause were prepared by the Livestock, Dairy and Poultry Branch, NASS, and reviewed by the 49 States involved. Total cattle and calf death losses from all causes were published in the 1995 "Meat Animals Production, Disposition, and Income" Report, released April 11, 1996. To estimate death loss by cause, cattle and calf losses from total predators were first determined. Next, the total predator estimate was broken down by specific predators, and a percent of total predator losses was calculated. This procedure was repeated to determine death losses from all other causes. All published loss estimates were rounded to the nearest 100 head. Value estimates were rounded to the nearest \$1,000. State estimates of less than 100 head are not published, but are included in U.S. totals. States were combined into regions when sampling variability did not permit individual state data to be released.

**Reliability:** Since all cattle operators are not included in the sample, survey estimates are subject to sampling variability. Survey results are also subject to non-sampling errors such as omissions, duplications, and mistakes in reporting, recording, and processing the data. The effects of these non-sampling errors cannot be measured directly. They are minimized through rigid quality controls in the data collection process and through a careful review of all reported data for consistency and reasonableness.



Terms and Definitions:

Cattle: Includes all cows, bulls, steers, and heifers weighing over 500 pounds. This includes beef and milk breeds as well as cattle on feed.

Calves: Beef and milk breed steers, heifers, and bulls weighing less than 500 pounds.

Regions: Mountain and Western:

|            |            |              |            |
|------------|------------|--------------|------------|
| Arizona    | Kansas     | North Dakota | Texas      |
| California | Montana    | Oklahoma     | Utah       |
| Colorado   | Nebraska   | Oregon       | Washington |
| Hawaii     | Nevada     | South Dakota | Wyoming    |
| Idaho      | New Mexico |              |            |

Midwest:

|          |          |           |           |
|----------|----------|-----------|-----------|
| Arkansas | Iowa     | Minnesota | Ohio      |
| Illinois | Michigan | Missouri  | Wisconsin |
| Indiana  |          |           |           |

Southern and Eastern:

|             |               |                |               |
|-------------|---------------|----------------|---------------|
| Alabama     | Louisiana     | New Jersey     | Tennessee     |
| Connecticut | Maine         | New York       | Vermont       |
| Delaware    | Maryland      | North Carolina | Virginia      |
| Florida     | Massachusetts | Pennsylvania   | West Virginia |
| Georgia     | Mississippi   | Rhode Island   |               |
| Kentucky    | New Hampshire | South Carolina |               |

Value: Cattle - An Average of the inventory value per head of cattle over 500 pounds. These data were collected nationally during the January 1, 1995 and 1996 Cattle Surveys.

Calves - An average of the inventory value per head of calves less than

500 pounds. These data were collected nationally during the January 1. 1995 and 1996 Cattle Surveys.

Digestive Problems: Includes bloat, scours, parasites, etc.

Respiratory Problems: Includes shipping fever, pneumonia, etc.

Poison: Includes nitrate poisoning and noxious feeds or weeds.

Mountain Lions and Bobcats: Includes cougars, pumas and lynx.

#### Index

|                                                                                                       | Page |
|-------------------------------------------------------------------------------------------------------|------|
| Losses and Value of Losses of Cattle and Calves<br>from all causes, U.S. ....                         | 2    |
| Losses of Cattle by Predators, Other Causes and Total,<br>by State and U.S. ....                      | 4    |
| Losses of Calves by Predators, Other Causes and Total,<br>by State and U.S. ....                      | 5    |
| Losses of Cattle and Calves by Coyotes and Dogs,<br>by State and U.S. ....                            | 6    |
| Losses of Cattle and Calves from Mountain Lions and Bobcats,<br>by Selected States and U.S. ....      | 7    |
| Losses of Cattle and Calves by Other Predators,<br>by State and U.S. ....                             | 8    |
| Losses of Cattle and Calves by Digestive Problems and Respiratory<br>Problems, by State and U.S. .... | 9    |

|                                                                                                       |    |
|-------------------------------------------------------------------------------------------------------|----|
| Losses of Cattle and Calves by Calving Problems and Weather,<br>by State and U.S. ....                | 10 |
| Losses of Cattle and Calves by Poison and Theft,<br>by State and U.S. ....                            | 11 |
| Losses of Cattle and Calves by Other and Unknown Causes,<br>by State and U.S. ....                    | 12 |
| Losses and Value of Losses of Cattle by Predators,<br>Other Causes, and Total, by State and U.S. .... | 13 |
| Losses and Value of Losses of Calves by Predators,<br>Other Causes, and Total, by State and U.S. .... | 14 |
| Losses of Cattle and Calves by Cause and Total Value,<br>by Region and U.S. ....                      | 15 |
| Survey Procedures and Reliability .....                                                               | 20 |

The United States Department of Agriculture (USDA) prohibits discrimination in its programs on the basis of race, color, national origin, sex, religion, age, disability, political beliefs, and marital or familial status. Persons with disabilities who require alternative means for communication of program information (braille, large print, audiotape, etc.) should contact the USDA Office of Communications at (202) 720-5881 (voice) or (202) 720-7808 (TDD).

To file a complaint, write the Secretary of Agriculture, USDA, Washington, D.C., 20250, or call (202) 720-7327 (voice) or (202) 720-1127 (TDD). USDA is an equal employment opportunity employer.

SUBSCRIBE TODAY!!

For your convenience, there are several ways to obtain NASS reports, data products, and services:

INTERNET ACCESS

All NASS reports are now available free of charge on the worldwide Internet.  
For access, connect to the Internet and select:

1.           Worldwide Web:  
              <http://www.usda.gov/nass/>           OR
2.           For Gopher/Telenet/FTP access:  
              HOST=usda.mannlib.cornell.edu           OR
3.           For a subscription direct to your e-mail address,  
              send an e-mail message to:  
              usda-reports@usda.mannlib.cornell.edu  
              and in the body of the message type the word: list

- - - - -

PRINTED REPORTS OR DATA PRODUCTS

CALL OUR TOLL-FREE ORDER DESK: 1-800-999-6779 (U.S. and Canada)  
Other areas, please call 1-703-834-0125           FAX: 1-703-834-0110  
(Visa, MasterCard, check, or money order acceptable for payment.)

- - - - -

ASSISTANCE

For assistance with general agricultural statistics or further information about  
NASS or its products or services, contact the NASS INFORMATION HOTLINE at  
1-800-727-9540, 8:00 a.m. to 4:30 p.m., or e-mail: NASS@NASS.USDA.GOV.
