# Supplementary material for: The Elephant in the room: What can we learn from California regarding the use of sport hunting of pumas (Puma concolor) as a management tool?
Source: PLOS journal article supplement (doi:10.1371/journal.pone.0224638), 2020-02-13
Supplement: S3 (10.1371/journal.pone.0224638.s003) [file journal.pone.0224638.s003]

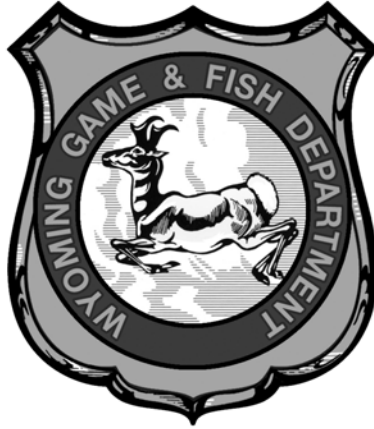

**ANNUAL  
REPORT**

**OF**

**BIG  
&  
TROPHY  
GAME  
HARVEST  
2007**

---



**ANNUAL REPORT**

**OF**

**BIG & TROPHY**

**GAME HARVEST**

**2007**

**For the Biological Year  
June 1, 2007 to May 31, 2008**

---

**Wyoming Game and Fish Department**

**Prepared by  
Christine Leonard, Harvest Survey Coordinator  
and Gail Sheridan, Administrative Secretary  
Biological Services**

**July 15, 2008**





## Table of Contents

### **Big Game Survey**

|                                                        |    |
|--------------------------------------------------------|----|
| Project Statement: Big Game Harvest Survey .....       | 1  |
| Summary of Big and Trophy Game Harvest Statewide ..... | 2  |
| Summary of Big Game Hunters .....                      | 3  |
| Resident Hunter Satisfaction Results .....             | 4  |
| Nonresident Hunter Satisfaction Results .....          | 5  |
| Antelope Survey Form .....                             | 6  |
| Deer Survey Form .....                                 | 10 |
| Elk Survey Form .....                                  | 14 |
| Black Bear Survey Form .....                           | 18 |
| Mountain Lion Survey Form .....                        | 22 |
| Moose Survey Form .....                                | 26 |
| Bighorn Sheep Survey Form .....                        | 27 |

### **Pronghorn Antelope Harvest**

|                                                                                    |    |
|------------------------------------------------------------------------------------|----|
| Antelope Harvest Statewide by Total Hunters: Table I .....                         | 29 |
| Antelope Ten-Year Comparison of Antelope Harvest: Table II .....                   | 29 |
| Antelope Harvest by Harvest Tool .....                                             | 29 |
| Antelope Harvest, Hunting Pressure and Hunter Success by Hunt Area: Table 1-A .... | 30 |
| Antelope Harvest by Herd Unit: Table I-H .....                                     | 43 |
| Confidence Intervals for Total Antelope Harvest by Herd Unit: Table III .....      | 47 |
| Antelope Hunters Hunting on Opening Day by Hunt Area and Residency: Table IV ....  | 48 |
| Antelope License Data Summary: Table VII .....                                     | 50 |
| Antelope Hunting Seasons: Chapter 5 .....                                          | 54 |
| Antelope Hunt Area Map .....                                                       | 77 |

### **Deer Harvest**

|                                                                                               |     |
|-----------------------------------------------------------------------------------------------|-----|
| Mule Deer Harvest Statewide by Total Hunters: Table I .....                                   | 79  |
| Mule Deer Harvest by Harvest Tool .....                                                       | 79  |
| White-tailed Deer Harvest Statewide by Total Hunters: Table II .....                          | 80  |
| White-tailed Deer Harvest by Harvest Tool .....                                               | 80  |
| Total Deer Harvest Statewide by Total Hunters: Table III .....                                | 81  |
| Statewide Deer Herd Ten-Year Comparison: Table IV .....                                       | 81  |
| Mule Deer Harvest, Hunting Pressure and Hunter Success by Hunt Area: Table I-A....            | 82  |
| Mule Deer Harvest by Herd Unit: Table I-H .....                                               | 98  |
| White-tailed Deer Harvest, Hunting Pressure, Hunter Success<br>by Hunt Area: Table II-A ..... | 103 |
| White-tailed Deer Harvest by Herd Unit: Table II-H .....                                      | 120 |
| Confidence Intervals for Total Deer Harvest by Herd Unit: Table V .....                       | 121 |
| Deer Hunters Hunting on Opening Day by Hunt Area and Residency: Table VI .....                | 122 |
| Deer License Data Summary: Table VII .....                                                    | 125 |
| Deer Hunting Seasons: Chapter 6 .....                                                         | 128 |
| Deer Hunt Area Map .....                                                                      | 156 |

## Table of Contents

### **Elk Harvest**

|                                                                               |     |
|-------------------------------------------------------------------------------|-----|
| Elk Harvest Statewide by Total Hunters: Table I .....                         | 157 |
| Elk Ten-Year Comparison of Harvest by Total Hunters: Table II .....           | 157 |
| Elk Harvest by Harvest Tool .....                                             | 157 |
| Elk Harvest, Hunting Pressure, Hunter Success by Hunt Area: Table I-A .....   | 158 |
| Elk Harvest by Herd Unit: Table I-H .....                                     | 172 |
| Confidence Intervals for Total Elk Harvest by Herd Unit: Table III .....      | 176 |
| Elk Hunters Hunting on Opening Day by Hunt Area and Residency: Table IV ..... | 177 |
| Elk License Data Summary: Table V .....                                       | 179 |
| Elk Hunting Seasons: Chapter 7 .....                                          | 183 |
| Elk Hunt Area Map .....                                                       | 209 |

### **Moose Harvest**

|                                                |     |
|------------------------------------------------|-----|
| Moose Harvest Statewide by Total Hunters ..... | 211 |
| Moose Ten-Year Comparison of Harvest .....     | 211 |
| Moose Harvest by Harvest Tool .....            | 211 |
| Moose Harvest by Hunt Area: Table I .....      | 212 |
| Moose Harvest by Herd Unit: Table II .....     | 215 |
| Moose Hunting Seasons: Chapter 8 .....         | 216 |
| Moose Hunt Area Map .....                      | 224 |

### **Bighorn Sheep Harvest**

|                                                        |     |
|--------------------------------------------------------|-----|
| Bighorn Sheep Harvest Statewide by Total Hunters ..... | 225 |
| Bighorn Sheep Ten-Year Comparison of Harvest .....     | 225 |
| Bighorn Sheep Harvest by Harvest Tool .....            | 225 |
| Bighorn Sheep Harvest by Hunt Area .....               | 226 |
| Bighorn Sheep Hunting Seasons: Chapter 9 .....         | 228 |
| Bighorn Sheep Hunt Area Map .....                      | 233 |

### **Mountain Goat Harvest**

|                                                    |     |
|----------------------------------------------------|-----|
| Mountain Goat Harvest Statewide .....              | 235 |
| Mountain Goat Ten-Year Comparison of Harvest ..... | 235 |
| Mountain Goat Harvest Statewide by Hunt Area ..... | 236 |
| Mountain Goat Hunting Seasons: Chapter 24 .....    | 237 |
| Mountain Goat Hunt Area Map .....                  | 239 |

### **Bison Harvest**

|                                                                          |     |
|--------------------------------------------------------------------------|-----|
| Bull Bison Harvest Statewide by Total Hunters .....                      | 241 |
| Bull Bison Nine-Year Comparison of Harvest .....                         | 241 |
| Cow Bison Harvest Statewide by Total Hunter: .....                       | 242 |
| Cow Bison Nine-Year Comparison of Harvest .....                          | 242 |
| Wild Bison Recreational Hunting Seasons: Chapter 15 .....                | 243 |
| Wild Bison Recreational Hunting Seasons: Chapter 15 Emergency Rule ..... | 247 |
| Bison Hunt Area Map .....                                                | 251 |

## Table of Contents

### **Black Bear Harvest**

|                                                                        |     |
|------------------------------------------------------------------------|-----|
| Black Bear Hunts, Recreation Days, Hunter Days Per Bear: Table I ..... | 253 |
| Black Bear Statewide Totals: Table II .....                            | 256 |
| Black Bear License Data Summary: Table III .....                       | 256 |
| Black Bear Harvest by Harvest Tool .....                               | 257 |
| Black Bear Hunting Seasons: Chapter 3 .....                            | 258 |
| Black Bear Hunt Area Map .....                                         | 267 |

### **Mountain Lion Harvest**

|                                                                                                          |     |
|----------------------------------------------------------------------------------------------------------|-----|
| Mountain Lion Hunters, Hunter Days, Harvest, Days Per Harvest, and Hunter<br>Success Rate: Table I ..... | 269 |
| Mountain Lion Statewide Totals: Table II .....                                                           | 272 |
| Mountain Lion License Data Summary: Table III .....                                                      | 272 |
| Mountain Lion Harvest by Harvest Tool: Table IV .....                                                    | 272 |
| Mountain Lion Hunting Seasons: Chapter 42 .....                                                          | 273 |
| Mountain Lion Hunting Seasons: Chapter 42 Emergency Rule .....                                           | 283 |
| Mountain Lion Hunt Area Map .....                                                                        | 293 |

### **Archery**

|                                                                               |     |
|-------------------------------------------------------------------------------|-----|
| Antelope Archery Hunting - Harvest by Hunters Holding an Archery Tag .....    | 295 |
| Antelope Archery Hunting - Total Days by Hunters Holding an Archery Tag ..... | 295 |
| Antelope Archery Hunting - Equipment Used .....                               | 295 |
| Bear Archery Hunting - Harvest by Hunters Holding an Archery Tag .....        | 296 |
| Bear Archery Hunting - Total Days by Hunters Holding an Archery Tag .....     | 296 |
| Bear Archery Hunting - Equipment Used .....                                   | 296 |
| Deer Archery Hunting - Harvest by Hunters Holding an Archery Tag .....        | 297 |
| Deer Archery Hunting - Total Days by Hunters Holding an Archery Tag .....     | 297 |
| Deer Archery Hunting - Equipment Used .....                                   | 297 |
| Elk Archery Hunting - Harvest by Hunters Holding an Archery Tag .....         | 298 |
| Elk Archery Hunting - Total Days by Hunters Holding an Archery Tag .....      | 298 |
| Elk Archery Hunting - Equipment Used .....                                    | 298 |



**JOB COMPLETION REPORT  
INVESTIGATIONS PROJECT**

**STATE OF Wyoming**

**NAME: Big and Trophy Game Harvest Surveys**

**PROJECT N. W-27-R-43**

**PREPARED BY: Biological Services Section  
Reg. Rothwell, Supervisor**

**PROJECT OBJECTIVE NO. 1 JOB NO. 1**

**PERIOD COVERED: June 1, 2007 to May 31, 2008**

**ABSTRACT:**

This report contains the results of harvest surveys completed following the 2007 big and trophy game hunting seasons. Harvest and hunting activity estimates for all big game, black bear and mountain lion were obtained by sampling licensed hunters with Internet and mailed questionnaires. Big and trophy game archery harvest for each species was determined as part of these surveys.

**OBJECTIVES:**

1. To determine the 2007 big and trophy game harvest.
2. To determine the number of active hunters, days spent hunting big and trophy game, the number of days required to harvest an animal, and the percent hunter success during 2007 hunting season.

**PROCEDURES:**

The 2007 pronghorn, deer, elk, black bear, and mountain lion harvest surveys were conducted by PA Consulting, Inc. (PA), the Department's harvest survey contractor for these species. At the close of the 2007 fall hunting season, license holders selected for the harvest survey were sent a postcard, asking them to complete the 2007 harvest survey on the internet site PA established for this purpose. Mountain lion hunters were contacted after the close of the majority of hunting seasons closed on March 31, 2008 (Three hunt areas remain open year round). After a period of time, each non-respondent was a sent harvest questionnaire by mail.

The procedure used in making the harvest and hunting estimates was similar for pronghorn, deer and elk. In general, a stratified systematic random sample was drawn from holders of pronghorn antelope, deer and elk licenses. License holders were stratified by residency, license type, hunt area(s), and/or region in which their licenses were valid. Resident general deer and elk license holders were also stratified by the county in which their licenses were purchased. For black bear and mountain lion, only information on hunter effort and success was requested since registration of all harvested black bears and mountain lions is mandatory. Black bear and mountain lion surveys are censuses. Because 3 mountain lion hunt areas are open from September 1 through August 31 (essentially year round), hunters were asked to estimate how much they would hunt in those hunt areas from April 1 through August 31, and PA then estimated effort and success for them.

Big game license holder samples adequate to meet survey objectives for both resident and nonresident hunters were drawn from license data, and they included both general and limited quota license types. Big game harvest estimates were made for each hunt area and for each herd unit within the state. Herd units consist of one or more hunt areas. Harvest for a herd unit was determined by combining harvest estimates from the appropriate hunt areas.

Hunters with general licenses are allowed to hunt many areas. Even hunters with limited quota licenses are allowed to hunt more than one area in some herd units. As a result, two steps are required to eliminate double or triple counting of hunters and provide accurate estimates of individual hunter numbers. When estimates of the number of hunters per herd unit are made, we count those who hunted more than one area within a herd unit as one hunter. Likewise, for statewide hunter estimates, we considered those who hunted more than one herd unit only one hunter. Thus, adding hunter numbers for hunt areas, herd units and the entire state would produce three different estimates of hunter numbers. All are accurate, but with a different frame of reference.

Additional questions were asked of hunters in an attempt to determine hunter satisfaction and hunter use of the lands enrolled in the Department's Private Lands Public Wildlife program.

# 2007

## Summary of Big and Trophy Game Harvest Statewide

| Species           | Number<br>of Hunters | Days<br>Hunted | Harvest | Hunter<br>Success |
|-------------------|----------------------|----------------|---------|-------------------|
| Pronghorn         | 52,774               | 169,419        | 51,883  | 98.4%             |
| Mule Deer         | 65,503               | 328,020        | 41,106  | 62.8%             |
| White-tailed Deer | 25,008               | 113,668        | 13,955  | 55.8%             |
| Elk               | 52,151               | 387,973        | 22,523  | 43.2%             |
| Moose             | 750                  | 4,674          | 669     | 89.2%             |
| Bighorn Sheep     | 237                  | 2,225          | 201     | 84.8%             |
| Mountain Goat     | 20                   | 113            | 19      | 95.0%             |
| Bison             | 277                  | 824            | 267     | 96.3%             |
| Black Bear        | 1,981                | 19,379         | 213     | *                 |
| Mountain Lion     | 1,068                | 10,944         | 198     | *                 |

\* success not applicable, harvest is regulated by area quotas

**2007**  
**Summary of Big Game Hunters\***

| <b>License Combinations</b>    | <b>Resident</b> | <b>Nonresident</b> |
|--------------------------------|-----------------|--------------------|
| Antelope                       | 3445            | 12301              |
| Deer                           | 14193           | 18085              |
| Elk                            | 10355           | 7073               |
| Bear                           | 108             | 184                |
| Mt Lion**                      | 165             | 99                 |
| Multiple Antelope              | 1224            | 16488              |
| Multiple Deer                  | 2985            | 6087               |
| Multiple Elk                   | 2597            | 869                |
| Antelope and Deer              | 5063            | 10066              |
| Antelope and Elk               | 3076            | 668                |
| Deer and Elk                   | 19083           | 1242               |
| Antelope Deer Elk              | 10654           | 446                |
| Antelope Bear                  | 22              | 19                 |
| Antelope Bear Elk              | 60              | 1                  |
| Antelope Bear Deer             | 71              | 13                 |
| Bear Elk                       | 130             | 23                 |
| Bear Deer                      | 134             | 25                 |
| Bear Elk Deer                  | 1046            | 8                  |
| Antelope Bear Elk Deer         | 869             | 4                  |
| Mt Lion Antelope               | 21              | 6                  |
| Mt Lion Bear                   | 16              | 0                  |
| Mt Lion Deer                   | 193             | 7                  |
| Mt Lion Elk                    | 118             | 3                  |
| Mt Lion Antelope Bear          | 1               | 0                  |
| Mt Lion Antelope Deer          | 83              | 3                  |
| Mt Lion Antelope Elk           | 24              | 0                  |
| Mt Lion Bear Deer              | 25              | 0                  |
| Mt Lion Bear Elk               | 10              | 0                  |
| Mt Lion Deer Elk               | 450             | 2                  |
| Mt Lion Antelope Bear Deer     | 7               | 1                  |
| Mt Lion Antelope Bear Elk      | 7               | 0                  |
| Mt Lion Antelope Deer Elk      | 479             | 2                  |
| Mt Lion Bear Deer Elk          | 189             | 3                  |
| Mt Lion Antelope Bear Deer Elk | 271             | 2                  |
| <b>Totals</b>                  | <b>77173</b>    | <b>73728</b>       |

\*License combinations for all Big Game license holders (regardless of whether or not they hunted).

\*\* Mountain lion hunt season: September 1, 2007 - March 31, 2008

## 2007 Hunter Satisfaction Questions\* Resident Response, by Species

### Antelope:

| Question # | Very Satisfied | Satisfied | Neutral | Dissatisfied | Very Dissatisfied |
|------------|----------------|-----------|---------|--------------|-------------------|
| 1          | 45.7%          | 42.6%     | 7.8%    | 2.8%         | 1.1%              |
| 2          | 45.6%          | 34.4%     | 17.9%   | 1.3%         | 0.7%              |

### Deer:

| Question # | Very Satisfied | Satisfied | Neutral | Dissatisfied | Very Dissatisfied |
|------------|----------------|-----------|---------|--------------|-------------------|
| 1          | 26.6%          | 45.8%     | 15.6%   | 7.9%         | 4.1%              |
| 2          | 35.2%          | 41.1%     | 19.0%   | 2.2%         | 2.3%              |

### Elk:

| Question # | Very Satisfied | Satisfied | Neutral | Dissatisfied | Very Dissatisfied |
|------------|----------------|-----------|---------|--------------|-------------------|
| 1          | 25.8%          | 40.6%     | 16.7%   | 10.7%        | 6.2%              |
| 2          | 36.5%          | 42.2%     | 16.3%   | 2.3%         | 2.6%              |

### Black Bear:

| Question # | Very Satisfied | Satisfied | Neutral | Dissatisfied | Very Dissatisfied |
|------------|----------------|-----------|---------|--------------|-------------------|
| 1          | 18.2%          | 40.4%     | 26.2%   | 10.3%        | 4.9%              |
| 2          | 30.2%          | 38.3%     | 25.8%   | 3.6%         | 2.0%              |

\*unweighted numbers

Questions:

1. The overall quality of your hunt?
2. If you were contacted by WY Game and Fish personnel while you were in the field, rate your experience?

## 2007/2008 Hunter Satisfaction Questions\* Resident Response

### Mountain Lion:

| Question # | Very Satisfied | Satisfied | Neutral | Dissatisfied | Very Dissatisfied |
|------------|----------------|-----------|---------|--------------|-------------------|
| 1          | 21.8%          | 40.4%     | 29.0%   | 6.3%         | 2.6%              |
| 2          | 33.5%          | 38.6%     | 20.3%   | 3.2%         | 4.4%              |

\*unweighted numbers

Questions:

1. The overall quality of your hunt?
2. If you were contacted by WY Game and Fish personnel in the field or if you registered a harvested Mountain Lion, rate your experience...



## 2007 Hunter Satisfaction Questions\* Nonresident Response, by Species

### Antelope:

| Question # | Very Satisfied | Satisfied | Neutral | Dissatisfied | Very Dissatisfied |
|------------|----------------|-----------|---------|--------------|-------------------|
| 1          | 64.3%          | 29.8%     | 3.9%    | 1.4%         | 0.7%              |
| 2          | 61.7%          | 26.8%     | 8.5%    | 1.6%         | 1.3%              |

### Deer:

| Question # | Very Satisfied | Satisfied | Neutral | Dissatisfied | Very Dissatisfied |
|------------|----------------|-----------|---------|--------------|-------------------|
| 1          | 42.5%          | 39.1%     | 9.8%    | 5.7%         | 2.9%              |
| 2          | 51.2%          | 34.7%     | 10.1%   | 2.4%         | 1.6%              |

### Elk:

| Question # | Very Satisfied | Satisfied | Neutral | Dissatisfied | Very Dissatisfied |
|------------|----------------|-----------|---------|--------------|-------------------|
| 1          | 41.1%          | 36.4%     | 10.2%   | 7.6%         | 4.7%              |
| 2          | 54.8%          | 31.9%     | 11.2%   | 1.1%         | 1.0%              |

### Black Bear:

| Question # | Very Satisfied | Satisfied | Neutral | Dissatisfied | Very Dissatisfied |
|------------|----------------|-----------|---------|--------------|-------------------|
| 1          | 31.2%          | 37.7%     | 20.1%   | 7.1%         | 3.9%              |
| 2          | 50.0%          | 23.3%     | 26.7%   | 0.0%         | 0.0%              |

\*unweighted numbers

Questions:

1. The overall quality of your hunt?
2. If you were contacted by WY Game and Fish personnel while you were in the field, rate your experience?

## 2007/2008 Hunter Satisfaction Questions\* Nonresident Response

### Mountain Lion:

| Question # | Very Satisfied | Satisfied | Neutral | Dissatisfied | Very Dissatisfied |
|------------|----------------|-----------|---------|--------------|-------------------|
| 1          | 54.3%          | 30.4%     | 10.9%   | 4.3%         | 0.0%              |
| 2          | 62.9%          | 28.6%     | 8.6%    | 0.0%         | 0.0%              |

\*unweighted numbers

Questions:

1. The overall quality of your hunt?
2. If you were contacted by WY Game and Fish personnel in the field or if you registered a harvested Mountain Lion, rate your experience...

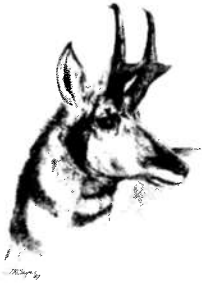

## 2007 WYOMING PRONGHORN HUNTER SURVEY

If you prefer to fill out the survey on the Internet ([www.wyhunter.org/pronghorn](http://www.wyhunter.org/pronghorn)), please use the 8-digit password on the back of this survey.

If you have questions about the survey or prefer to complete it over the phone, please contact Chris Mayhew at 1-800-216-0477 or e-mail: [chris.mayhew@paconsulting.com](mailto:chris.mayhew@paconsulting.com)

Please complete this survey after you have finished hunting or decided not to hunt Pronghorn for the season.

**Q1.** Did you hunt Pronghorn in Wyoming during the 2007 season? (*Check one box*)

☐ Yes ☐ No (**IF YOU DID NOT HUNT PRONGHORN DURING THE 2007 SEASON, SKIP TO Q15**)

**Q2.** How many **different** days did you hunt Pronghorn in Wyoming during the 2007 season? (**NOTE:** Count each partial day of hunting as 1 day of Pronghorn hunting) (Enter number in space below)

Number of different days

**Q3.** Please indicate your satisfaction when hunting Pronghorn in Wyoming during the 2007 season. (*Check one box for each question below*)

|                                                                                                            | Very Satisfied           | Satisfied                | Neutral                  | Dissatisfied             | Very Dissatisfied        | Not Applicable           |
|------------------------------------------------------------------------------------------------------------|--------------------------|--------------------------|--------------------------|--------------------------|--------------------------|--------------------------|
| How satisfied were you with the overall quality of your hunt.....                                          | <input type="checkbox"/> |
| If you were contacted by WY Game and Fish personnel while you were in the field, rate your experience..... | <input type="checkbox"/> |

**Q4.** What was the PRIMARY weapon you used to hunt Pronghorn in Wyoming during the 2007 season? (*This would be the weapon you used the most amount of time to hunt Pronghorn and may or may not be the weapon you actually used to harvest a Pronghorn*) (*Check one box only*)

☐ Rifle or Pistol ☐ Muzzleloader ☐ Archery (**Skip to Q6**)

**Q5.** Did you hunt Pronghorn with archery equipment in Wyoming during the 2007 season? (*Check one box*)

☐ Yes ☐ No (**Skip to Q8**)

**Q6.** What type of archery equipment did you use during the 2007 Pronghorn season? (*Check all that apply*)

☐ Compound bow ☐ Recurve bow ☐ Long bow ☐ Crossbow

**Q7.** How many **different** days did you hunt Pronghorn with archery equipment in Wyoming during the 2007 archery and gun season? (**NOTE:** Count each partial day of hunting as 1 day of Pronghorn hunting) (Enter number in space below)

Number of different days hunted with archery equipment during the archery-only season

Number of different days hunted with archery equipment during the gun season

## 2007 Pronghorn Hunt Information

**Q8.** How many **FULL PRICE** Pronghorn licenses did you hold? (Reminder: Full Price means General or Limited Quota regular, youth, pioneer or landowner Pronghorn license other than Type 6 or 7)

☐ None (Skip to Q9)      ☐ One      ☐ Two

**Q8a.** For each **FULL PRICE** license please write the Hunt Area, License Type, and indicate whether you hunted with this license. (Hunt Area and License Type are on your license documents)

| Type of Full Price License(s) Held                                                                                                                                                                                                                                                                                                                                                                                                                                                                                                                                          | Did you hunt with this license?                          |
|-----------------------------------------------------------------------------------------------------------------------------------------------------------------------------------------------------------------------------------------------------------------------------------------------------------------------------------------------------------------------------------------------------------------------------------------------------------------------------------------------------------------------------------------------------------------------------|----------------------------------------------------------|
| 1st FULL PRICE license    Hunt Area: <span style="border: 1px solid black; display: inline-block; width: 30px; height: 20px; vertical-align: middle;"></span> <span style="border: 1px solid black; display: inline-block; width: 30px; height: 20px; vertical-align: middle;"></span> <span style="border: 1px solid black; display: inline-block; width: 30px; height: 20px; vertical-align: middle;"></span> License Type: <span style="border: 1px solid black; display: inline-block; width: 30px; height: 20px; vertical-align: middle;"></span> (Type 1, 2, 8, or 9) | <input type="checkbox"/> Yes <input type="checkbox"/> No |
| 2nd FULL PRICE license    Hunt Area: <span style="border: 1px solid black; display: inline-block; width: 30px; height: 20px; vertical-align: middle;"></span> <span style="border: 1px solid black; display: inline-block; width: 30px; height: 20px; vertical-align: middle;"></span> <span style="border: 1px solid black; display: inline-block; width: 30px; height: 20px; vertical-align: middle;"></span> License Type: <span style="border: 1px solid black; display: inline-block; width: 30px; height: 20px; vertical-align: middle;"></span> (Type 1, 2, 8, or 9) | <input type="checkbox"/> Yes <input type="checkbox"/> No |

**Q8b.** Please fill in the table below for up to 2 Hunt Areas you mainly hunted with each **FULL PRICE** Pronghorn license you held, even if you did not harvest a Pronghorn with one or more of these licenses.

|                                          | Number of the Hunt Area(s) where you hunted*<br>(Hunt Area numbers range from 1 to 117)                                                                                                                                                                                                                                       | Did you hunt opening day of the gun season in this Hunt Area?<br>(Check one box) | Number of different days hunted in this Hunt Area**<br>(Enter number below)                                                                                                                        | Did you harvest a Pronghorn in this Hunt Area?<br>(Check one box)                   | Age/sex of Pronghorn harvested in this Hunt Area (Check one box)                                                        | Weapon used to harvest this Pronghorn (Check one box)                                                                 |
|------------------------------------------|-------------------------------------------------------------------------------------------------------------------------------------------------------------------------------------------------------------------------------------------------------------------------------------------------------------------------------|----------------------------------------------------------------------------------|----------------------------------------------------------------------------------------------------------------------------------------------------------------------------------------------------|-------------------------------------------------------------------------------------|-------------------------------------------------------------------------------------------------------------------------|-----------------------------------------------------------------------------------------------------------------------|
| <b>1<sup>st</sup> Full Price License</b> | <b>Main Hunt Area hunted:</b><br><div style="border: 1px solid black; display: inline-block; width: 30px; height: 20px;"></div> <div style="border: 1px solid black; display: inline-block; width: 30px; height: 20px;"></div> <div style="border: 1px solid black; display: inline-block; width: 30px; height: 20px;"></div> | <input type="checkbox"/> Yes<br><input type="checkbox"/> No                      | <div style="border: 1px solid black; display: inline-block; width: 30px; height: 20px;"></div> <div style="border: 1px solid black; display: inline-block; width: 30px; height: 20px;"></div> days | <input type="checkbox"/> Yes<br><input type="checkbox"/> No (Skip to 2nd Hunt Area) | <input type="checkbox"/> Adult Buck<br><input type="checkbox"/> Adult Doe<br><input type="checkbox"/> Fawn (either sex) | <input type="checkbox"/> Rifle or Pistol<br><input type="checkbox"/> Muzzleloader<br><input type="checkbox"/> Archery |
|                                          | <b>2nd Hunt Area hunted:</b><br><div style="border: 1px solid black; display: inline-block; width: 30px; height: 20px;"></div> <div style="border: 1px solid black; display: inline-block; width: 30px; height: 20px;"></div> <div style="border: 1px solid black; display: inline-block; width: 30px; height: 20px;"></div>  | <input type="checkbox"/> Yes<br><input type="checkbox"/> No                      | <div style="border: 1px solid black; display: inline-block; width: 30px; height: 20px;"></div> <div style="border: 1px solid black; display: inline-block; width: 30px; height: 20px;"></div> days | <input type="checkbox"/> Yes<br><input type="checkbox"/> No (Skip to 2nd license)   | <input type="checkbox"/> Adult Buck<br><input type="checkbox"/> Adult Doe<br><input type="checkbox"/> Fawn (either sex) | <input type="checkbox"/> Rifle or Pistol<br><input type="checkbox"/> Muzzleloader<br><input type="checkbox"/> Archery |
| <b>2<sup>nd</sup> Full Price License</b> | <b>Main Hunt Area hunted:</b><br><div style="border: 1px solid black; display: inline-block; width: 30px; height: 20px;"></div> <div style="border: 1px solid black; display: inline-block; width: 30px; height: 20px;"></div> <div style="border: 1px solid black; display: inline-block; width: 30px; height: 20px;"></div> | <input type="checkbox"/> Yes<br><input type="checkbox"/> No                      | <div style="border: 1px solid black; display: inline-block; width: 30px; height: 20px;"></div> <div style="border: 1px solid black; display: inline-block; width: 30px; height: 20px;"></div> days | <input type="checkbox"/> Yes<br><input type="checkbox"/> No (Skip to 2nd Hunt Area) | <input type="checkbox"/> Adult Buck<br><input type="checkbox"/> Adult Doe<br><input type="checkbox"/> Fawn (either sex) | <input type="checkbox"/> Rifle or Pistol<br><input type="checkbox"/> Muzzleloader<br><input type="checkbox"/> Archery |
|                                          | <b>2nd Hunt Area hunted:</b><br><div style="border: 1px solid black; display: inline-block; width: 30px; height: 20px;"></div> <div style="border: 1px solid black; display: inline-block; width: 30px; height: 20px;"></div> <div style="border: 1px solid black; display: inline-block; width: 30px; height: 20px;"></div>  | <input type="checkbox"/> Yes<br><input type="checkbox"/> No                      | <div style="border: 1px solid black; display: inline-block; width: 30px; height: 20px;"></div> <div style="border: 1px solid black; display: inline-block; width: 30px; height: 20px;"></div> days | <input type="checkbox"/> Yes<br><input type="checkbox"/> No (Skip to Q9)            | <input type="checkbox"/> Adult Buck<br><input type="checkbox"/> Adult Doe<br><input type="checkbox"/> Fawn (either sex) | <input type="checkbox"/> Rifle or Pistol<br><input type="checkbox"/> Muzzleloader<br><input type="checkbox"/> Archery |

\* **NOTE:** Hunt Area map can be found on the back of the survey cover letter

\*\* **NOTE:** Please count each partial day of hunting as 1 day of Pronghorn hunting

**Q9.** How many **Type 6 or 7 Reduced Price DOE/FAWN** Pronghorn licenses did you hold? (Reminder: all Reduced Price Pronghorn licenses, including Reduced Price youth licenses and Type 6 or 7 pioneer licenses, have a Type 6 or 7 designation)

☐ None (Skip to Q10)      ☐ One      ☐ Two      ☐ Three      ☐ Four

**Q9a.** For each **Type 6 or 7 Reduced Price DOE/FAWN** Pronghorn license please write the Hunt Area and the License Type, and indicate whether you hunted with this license. (*Hunt Area and License Type are on your license documents*)

| Type of Reduced Price Doe/Fawn License(s) Held |                                                                           |                                                  |  | Did you hunt with this license?                          |
|------------------------------------------------|---------------------------------------------------------------------------|--------------------------------------------------|--|----------------------------------------------------------|
| 1st DOE/FAWN license                           | Hunt Area: <input type="text"/> <input type="text"/> <input type="text"/> | License Type: <input type="text"/> (Type 6 or 7) |  | <input type="checkbox"/> Yes <input type="checkbox"/> No |
| 2nd DOE/FAWN license                           | Hunt Area: <input type="text"/> <input type="text"/> <input type="text"/> | License Type: <input type="text"/> (Type 6 or 7) |  | <input type="checkbox"/> Yes <input type="checkbox"/> No |
| 3rd DOE/FAWN license                           | Hunt Area: <input type="text"/> <input type="text"/> <input type="text"/> | License Type: <input type="text"/> (Type 6 or 7) |  | <input type="checkbox"/> Yes <input type="checkbox"/> No |
| 4th DOE/FAWN license                           | Hunt Area: <input type="text"/> <input type="text"/> <input type="text"/> | License Type: <input type="text"/> (Type 6 or 7) |  | <input type="checkbox"/> Yes <input type="checkbox"/> No |

**Q9b.** Please fill in the table below for up to 2 Hunt Areas you mainly hunted with each **Type 6 or 7 Reduced Price DOE/FAWN** Pronghorn license you held, even if you did not harvest a Pronghorn with one or more of these licenses.

|                                        | Number of the Hunt Area(s) where you hunted*<br>(Hunt Area numbers range from 1 to 117)         | Did you hunt opening day of the gun season in this Hunt Area?<br>(Check one box) | Number of different days hunted in this Hunt Area**<br>(Enter number below) | Did you harvest a Pronghorn in this Hunt Area?<br>(Check one box)                            | Age/sex of Pronghorn harvested in this Hunt Area<br>(Check one box)              | Weapon used to harvest this Pronghorn<br>(Check one box)                                                              |
|----------------------------------------|-------------------------------------------------------------------------------------------------|----------------------------------------------------------------------------------|-----------------------------------------------------------------------------|----------------------------------------------------------------------------------------------|----------------------------------------------------------------------------------|-----------------------------------------------------------------------------------------------------------------------|
| <b>1<sup>st</sup> Doe/Fawn License</b> | <b>Main Hunt Area hunted:</b><br><input type="text"/> <input type="text"/> <input type="text"/> | <input type="checkbox"/> Yes<br><input type="checkbox"/> No                      | <input type="text"/> <input type="text"/> days                              | <input type="checkbox"/> Yes<br><input type="checkbox"/> No ( <i>Skip to 2nd Hunt Area</i> ) | <input type="checkbox"/> Adult Doe<br><input type="checkbox"/> Fawn (either sex) | <input type="checkbox"/> Rifle or Pistol<br><input type="checkbox"/> Muzzleloader<br><input type="checkbox"/> Archery |
|                                        | <b>2nd Hunt Area hunted:</b><br><input type="text"/> <input type="text"/> <input type="text"/>  | <input type="checkbox"/> Yes<br><input type="checkbox"/> No                      | <input type="text"/> <input type="text"/> days                              | <input type="checkbox"/> Yes<br><input type="checkbox"/> No ( <i>Skip to 2nd license</i> )   | <input type="checkbox"/> Adult Doe<br><input type="checkbox"/> Fawn (either sex) | <input type="checkbox"/> Rifle or Pistol<br><input type="checkbox"/> Muzzleloader<br><input type="checkbox"/> Archery |
| <b>2<sup>nd</sup> Doe/Fawn License</b> | <b>Main Hunt Area hunted:</b><br><input type="text"/> <input type="text"/> <input type="text"/> | <input type="checkbox"/> Yes<br><input type="checkbox"/> No                      | <input type="text"/> <input type="text"/> days                              | <input type="checkbox"/> Yes<br><input type="checkbox"/> No ( <i>Skip to 2nd Hunt Area</i> ) | <input type="checkbox"/> Adult Doe<br><input type="checkbox"/> Fawn (either sex) | <input type="checkbox"/> Rifle or Pistol<br><input type="checkbox"/> Muzzleloader<br><input type="checkbox"/> Archery |
|                                        | <b>2nd Hunt Area hunted:</b><br><input type="text"/> <input type="text"/> <input type="text"/>  | <input type="checkbox"/> Yes<br><input type="checkbox"/> No                      | <input type="text"/> <input type="text"/> days                              | <input type="checkbox"/> Yes<br><input type="checkbox"/> No ( <i>Skip to 3rd license</i> )   | <input type="checkbox"/> Adult Doe<br><input type="checkbox"/> Fawn (either sex) | <input type="checkbox"/> Rifle or Pistol<br><input type="checkbox"/> Muzzleloader<br><input type="checkbox"/> Archery |
| <b>3<sup>rd</sup> Doe/Fawn License</b> | <b>Main Hunt Area hunted:</b><br><input type="text"/> <input type="text"/> <input type="text"/> | <input type="checkbox"/> Yes<br><input type="checkbox"/> No                      | <input type="text"/> <input type="text"/> days                              | <input type="checkbox"/> Yes<br><input type="checkbox"/> No ( <i>Skip to 2nd Hunt Area</i> ) | <input type="checkbox"/> Adult Doe<br><input type="checkbox"/> Fawn (either sex) | <input type="checkbox"/> Rifle or Pistol<br><input type="checkbox"/> Muzzleloader<br><input type="checkbox"/> Archery |
|                                        | <b>2nd Hunt Area hunted:</b><br><input type="text"/> <input type="text"/> <input type="text"/>  | <input type="checkbox"/> Yes<br><input type="checkbox"/> No                      | <input type="text"/> <input type="text"/> days                              | <input type="checkbox"/> Yes<br><input type="checkbox"/> No ( <i>Skip to 4th license</i> )   | <input type="checkbox"/> Adult Doe<br><input type="checkbox"/> Fawn (either sex) | <input type="checkbox"/> Rifle or Pistol<br><input type="checkbox"/> Muzzleloader<br><input type="checkbox"/> Archery |
| <b>4<sup>th</sup> Doe/Fawn License</b> | <b>Main Hunt Area hunted:</b><br><input type="text"/> <input type="text"/> <input type="text"/> | <input type="checkbox"/> Yes<br><input type="checkbox"/> No                      | <input type="text"/> <input type="text"/> days                              | <input type="checkbox"/> Yes<br><input type="checkbox"/> No ( <i>Skip to 2nd Hunt Area</i> ) | <input type="checkbox"/> Adult Doe<br><input type="checkbox"/> Fawn (either sex) | <input type="checkbox"/> Rifle or Pistol<br><input type="checkbox"/> Muzzleloader<br><input type="checkbox"/> Archery |
|                                        | <b>2nd Hunt Area hunted:</b><br><input type="text"/> <input type="text"/> <input type="text"/>  | <input type="checkbox"/> Yes<br><input type="checkbox"/> No                      | <input type="text"/> <input type="text"/> days                              | <input type="checkbox"/> Yes<br><input type="checkbox"/> No ( <i>Skip to Q10</i> )           | <input type="checkbox"/> Adult Doe<br><input type="checkbox"/> Fawn (either sex) | <input type="checkbox"/> Rifle or Pistol<br><input type="checkbox"/> Muzzleloader<br><input type="checkbox"/> Archery |

\* **NOTE:** Hunt Area map can be found on the back of the survey cover letter

\*\* **NOTE:** Please count each partial day of hunting as 1 day of Pronghorn hunting

**OVER** →

## Private Lands Public Wildlife Access Program

In 1997, the Wyoming Game and Fish Department began the Private Lands Public Wildlife Access Program (PLPW) to improve public hunting and fishing access on private and land-locked public lands through the **Walk-in Area** and **Hunter Management Area** programs. Your response to the following questions will help the Department improve this program to better serve hunters.

**Q10.** Did you hunt Pronghorn on any of the PLPW Walk-in Areas or Hunter Management Areas during the 2007 season? (**NOTE:** Walk-in Areas are open to hunting without a permission slip, but a permission slip is needed for Hunter Management Areas)

☐ Yes

☐ No (**Skip to Q15**)

☐ Don't know (**Skip to Q15**)

**Q11.** How many different days did you hunt Pronghorn on PLPW Walk-in Areas or Hunter Management Areas during the 2007 season? (**NOTE:** Count each partial day of hunting as 1 day of Pronghorn hunting) (Enter number in space below; if no days, write 0)

Days hunted in **Walk-in Areas**

Days hunted in **Hunter Management Areas**

**Q12.** On how many different PLPW Walk-in Areas or Hunter Management Areas did you hunt Pronghorn during the 2007 season? (If no areas, write 0)

Different **Walk-in Areas**

Different **Hunter Management Areas**

**Q13.** Overall, how satisfied were you with the opportunity Wyoming Game and Fish provided through the PLPW Walk-in Area and Hunter Management Area programs? (check one box below)

Very  
Satisfied

☐

Satisfied

☐

Neutral

☐

Dissatisfied

☐

Very  
Dissatisfied

☐

**Q14.** If you were dissatisfied, why?

---

## Other 2007 Big Game Licenses

**Q15.** What other 2007 Wyoming big game licenses did you hold? (Check all that apply)

☐ Black Bear

☐ Deer

☐ Elk

☐ Mountain Lion

☐ No other big game license

**Thank you for your help with this important study!**

COMMENTS: Feel free to attach a sheet of paper with any comments you would like to share with the Wyoming Game and Fish Department. **Please include the hunt area as well as the species hunted with your comments.** These comments along with your contact information will be sent directly to the Wyoming Game and Fish Department.

(**NOTE:** individual responses to survey questions are confidential and will not be shared with the Wyoming Game and Fish Department)

**Please return your completed survey in the enclosed, postage-paid envelope to:**

**Wyoming Big Game Hunter Survey, c/o PA Consulting Group, 6410 Enterprise Lane, Suite 300, Madison WI 53719**

password:

11999980

9943516995

94 1 95 7 95 7

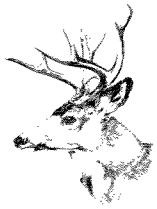

## 2007 WYOMING DEER HUNTER SURVEY

If you prefer to fill out the survey on the Internet ([www.wyhunter.org/deer](http://www.wyhunter.org/deer)), please use the 8-digit password on the back of this survey.

If you have questions about the survey or prefer to complete it over the phone, please contact Chris Mayhew at 1-800-216-0477 or e-mail: [chris.mayhew@paconsulting.com](mailto:chris.mayhew@paconsulting.com)

Please complete this survey after you have finished hunting or decided not to hunt Deer for the season.

**Q1.** Did you hunt Deer in Wyoming during the 2007 season? (Check one box)

☐ Yes ☐ No (IF YOU DID NOT HUNT DEER DURING THE 2007 SEASON, SKIP TO Q15)

**Q2.** How many **different** days did you hunt Deer in Wyoming during the 2007 season? (**NOTE:** Count each partial day of hunting as 1 day of Deer hunting) (Enter number in space below)

Number of different days

**Q3.** Please indicate your satisfaction when hunting Deer in Wyoming during the 2007 season. (Check one box for each question below)

|                                                                                                            | Very Satisfied           | Satisfied                | Neutral                  | Dissatisfied             | Very Dissatisfied        | Not Applicable           |
|------------------------------------------------------------------------------------------------------------|--------------------------|--------------------------|--------------------------|--------------------------|--------------------------|--------------------------|
| How satisfied were you with the overall quality of your hunt.....                                          | <input type="checkbox"/> |
| If you were contacted by WY Game and Fish personnel while you were in the field, rate your experience..... | <input type="checkbox"/> |

**Q4.** What was the PRIMARY weapon you used to hunt Deer in Wyoming during the 2007 season? (This would be the weapon you spent the most amount of time hunting Deer and may or may not be the weapon you actually used to harvest a Deer) (Check one box only)

☐ Rifle or Pistol ☐ Muzzleloader ☐ Archery (Skip to Q5a)

**Q5.** Did you hunt Deer with archery equipment in Wyoming during the 2007 season? (Check one box)

☐ Yes ☐ No (Skip to Q8)

**Q5a.** What percent of time did you spend hunting Mule Deer vs. White-tailed Deer with archery equipment during the 2007 Deer season? (Enter percents below so that the total equals 100%)

Mule Deer:  % + White-tailed Deer:  % = **100% TOTAL**

**Q6.** What type of archery equipment did you use during the 2007 Deer season? (Check all that apply)

☐ Compound bow ☐ Recurve bow ☐ Long bow ☐ Crossbow

**Q7.** How many **different** days did you hunt Deer with archery equipment in Wyoming during the 2007 archery and gun seasons? (**NOTE:** Count each partial day of hunting as 1 day of Deer hunting) (Enter number in space below)

Number of different days hunted with archery equipment during the archery-only season

Number of different days hunted with archery equipment during the gun season

## 2007 Deer Hunt Information

**Q8.** Did you hold a **FULL PRICE** Deer license? (Reminder: Full Price means General or Limited Quota regular, youth, pioneer or landowner Deer license other than Type 6 or 7)

☐ Yes ☐ No (Skip to Q9)

**Q8a.** Did you hunt with this **FULL PRICE** Deer license?

☐ Yes ☐ No (Skip to Q9)

**Q8b.** Please fill in the table below for up to 3 Hunt Areas you mainly hunted with this **FULL PRICE** Deer license, even if you did not harvest with this license.

| Number of the Hunt Area(s) where you hunted* (Hunt Area numbers range from 1 to 171) | Did you hunt opening day of the gun season in this Hunt Area? (Check one box) | Number of different days hunted in this Hunt Area** (Enter number below) | Percent of time hunted Mule Deer vs. White-tailed Deer in this Hunt Area (Enter percent below) | Did you harvest a Deer in this Hunt Area? (Check one box)                                                                                             | Age/sex of Deer harvested in this Hunt Area (Check one box)                                                             | Weapon used to harvest this Deer (Check one box)                                                                      |
|--------------------------------------------------------------------------------------|-------------------------------------------------------------------------------|--------------------------------------------------------------------------|------------------------------------------------------------------------------------------------|-------------------------------------------------------------------------------------------------------------------------------------------------------|-------------------------------------------------------------------------------------------------------------------------|-----------------------------------------------------------------------------------------------------------------------|
| <b>Main Hunt Area hunted:</b> (do not list region letter)<br>[ ][ ][ ]               | <input type="checkbox"/> Yes<br><input type="checkbox"/> No                   | [ ][ ] days                                                              | Mule Deer: [ ][ ][ ] %<br>White-tailed Deer: [ ][ ][ ] %<br><b>100% TOTAL</b>                  | <input type="checkbox"/> Yes, a Mule deer<br><input type="checkbox"/> Yes, a White-tailed deer<br><input type="checkbox"/> No (Skip to 2nd Hunt Area) | <input type="checkbox"/> Adult Buck<br><input type="checkbox"/> Adult Doe<br><input type="checkbox"/> Fawn (either sex) | <input type="checkbox"/> Rifle or Pistol<br><input type="checkbox"/> Muzzleloader<br><input type="checkbox"/> Archery |
| <b>2nd Hunt Area hunted:</b> (do not list region letter)<br>[ ][ ][ ]                | <input type="checkbox"/> Yes<br><input type="checkbox"/> No                   | [ ][ ] days                                                              | Mule Deer: [ ][ ][ ] %<br>White-tailed Deer: [ ][ ][ ] %<br><b>100% TOTAL</b>                  | <input type="checkbox"/> Yes, a Mule deer<br><input type="checkbox"/> Yes, a White-tailed deer<br><input type="checkbox"/> No (Skip to 3rd Hunt Area) | <input type="checkbox"/> Adult Buck<br><input type="checkbox"/> Adult Doe<br><input type="checkbox"/> Fawn (either sex) | <input type="checkbox"/> Rifle or Pistol<br><input type="checkbox"/> Muzzleloader<br><input type="checkbox"/> Archery |
| <b>3rd Hunt Area hunted:</b> (do not list region letter)<br>[ ][ ][ ]                | <input type="checkbox"/> Yes<br><input type="checkbox"/> No                   | [ ][ ] days                                                              | Mule Deer: [ ][ ][ ] %<br>White-tailed Deer: [ ][ ][ ] %<br><b>100% TOTAL</b>                  | <input type="checkbox"/> Yes, a Mule deer<br><input type="checkbox"/> Yes, a White-tailed deer<br><input type="checkbox"/> No (Skip to Q9)            | <input type="checkbox"/> Adult Buck<br><input type="checkbox"/> Adult Doe<br><input type="checkbox"/> Fawn (either sex) | <input type="checkbox"/> Rifle or Pistol<br><input type="checkbox"/> Muzzleloader<br><input type="checkbox"/> Archery |

**\*Note:** Hunt Area map can be found on the back of the survey cover letter

**\*\*Note:** Please count each partial day of hunting as 1 day of Deer hunting

**Q9.** How many **Type 6 or 7 Reduced Price DOE/FAWN** Deer licenses did you hold? (Reminder: all Reduced Price Deer licenses, including Reduced Price youth licenses and Type 6 or 7 pioneer licenses, have a Type 6 or 7 designation)

☐ None (Skip to Q10) ☐ One ☐ Two ☐ Three ☐ Four

**Q9a.** For each **Type 6 or 7 Reduced Price DOE/FAWN** Deer license, please write the Hunt Area, License Type, and indicate whether you hunted with this license. (Hunt Area and License Type are on your license documents)

| Type of Reduced Price DOE/FAWN License(s) Held |                      |                                 | Did you hunt with this license? |                             |
|------------------------------------------------|----------------------|---------------------------------|---------------------------------|-----------------------------|
| 1st DOE/FAWN license                           | Hunt Area: [ ][ ][ ] | License Type: [ ] (Type 6 or 7) | <input type="checkbox"/> Yes    | <input type="checkbox"/> No |
| 2nd DOE/FAWN license                           | Hunt Area: [ ][ ][ ] | License Type: [ ] (Type 6 or 7) | <input type="checkbox"/> Yes    | <input type="checkbox"/> No |
| 3rd DOE/FAWN license                           | Hunt Area: [ ][ ][ ] | License Type: [ ] (Type 6 or 7) | <input type="checkbox"/> Yes    | <input type="checkbox"/> No |
| 4th DOE/FAWN license                           | Hunt Area: [ ][ ][ ] | License Type: [ ] (Type 6 or 7) | <input type="checkbox"/> Yes    | <input type="checkbox"/> No |

**Q9b.** Please fill in the table below for up to 2 Hunt Areas you mainly hunted with each **Type 6 or 7 Reduced Price DOE/FAWN** Deer license you held, even if you did not harvest a Deer with one or more of these licenses.

|                                        | Number of the Hunt Area(s) where you hunted* ( <i>Hunt Area numbers range from 1 to 171</i> ) | Did you hunt opening day of the gun season in this Hunt Area? (Check one box) | Number of different days hunted in this Hunt Area** (Enter number below) | Percent of time hunted Mule Deer vs. White-tailed Deer in this Hunt Area (Enter percent below)                                    | Did you harvest a Deer in this Hunt Area? (Check one box)                                                                                                      | Age/sex of Deer harvested in this Hunt Area (Check one box)                      | Weapon used to harvest this Deer (Check one box)                                                                      |
|----------------------------------------|-----------------------------------------------------------------------------------------------|-------------------------------------------------------------------------------|--------------------------------------------------------------------------|-----------------------------------------------------------------------------------------------------------------------------------|----------------------------------------------------------------------------------------------------------------------------------------------------------------|----------------------------------------------------------------------------------|-----------------------------------------------------------------------------------------------------------------------|
| <b>1<sup>st</sup> Doe/Fawn License</b> | <b>Main Hunt Area hunted:</b><br><div> <div></div><div></div><div></div> </div>               | <input type="checkbox"/> Yes<br><input type="checkbox"/> No                   | <div> <div></div><div></div> </div> days                                 | Mule Deer: <div></div> <div></div> <div></div> %<br>White-tailed Deer: <div></div> <div></div> <div></div> %<br><b>100% TOTAL</b> | <input type="checkbox"/> Yes, a Mule deer<br><input type="checkbox"/> Yes, a White-tailed deer<br><input type="checkbox"/> No ( <b>Skip to 2nd Hunt Area</b> ) | <input type="checkbox"/> Adult Doe<br><input type="checkbox"/> Fawn (either sex) | <input type="checkbox"/> Rifle or Pistol<br><input type="checkbox"/> Muzzleloader<br><input type="checkbox"/> Archery |
|                                        | <b>2nd Hunt Area hunted:</b><br><div> <div></div><div></div><div></div> </div>                | <input type="checkbox"/> Yes<br><input type="checkbox"/> No                   | <div> <div></div><div></div> </div> days                                 | Mule Deer: <div></div> <div></div> <div></div> %<br>White-tailed Deer: <div></div> <div></div> <div></div> %<br><b>100% TOTAL</b> | <input type="checkbox"/> Yes, a Mule deer<br><input type="checkbox"/> Yes, a White-tailed deer<br><input type="checkbox"/> No ( <b>Skip to 2nd license</b> )   | <input type="checkbox"/> Adult Doe<br><input type="checkbox"/> Fawn (either sex) | <input type="checkbox"/> Rifle or Pistol<br><input type="checkbox"/> Muzzleloader<br><input type="checkbox"/> Archery |
| <b>2<sup>nd</sup> Doe/Fawn License</b> | <b>Main Hunt Area hunted:</b><br><div> <div></div><div></div><div></div> </div>               | <input type="checkbox"/> Yes<br><input type="checkbox"/> No                   | <div> <div></div><div></div> </div> days                                 | Mule Deer: <div></div> <div></div> <div></div> %<br>White-tailed Deer: <div></div> <div></div> <div></div> %<br><b>100% TOTAL</b> | <input type="checkbox"/> Yes, a Mule deer<br><input type="checkbox"/> Yes, a White-tailed deer<br><input type="checkbox"/> No ( <b>Skip to 2nd Hunt Area</b> ) | <input type="checkbox"/> Adult Doe<br><input type="checkbox"/> Fawn (either sex) | <input type="checkbox"/> Rifle or Pistol<br><input type="checkbox"/> Muzzleloader<br><input type="checkbox"/> Archery |
|                                        | <b>2nd Hunt Area hunted:</b><br><div> <div></div><div></div><div></div> </div>                | <input type="checkbox"/> Yes<br><input type="checkbox"/> No                   | <div> <div></div><div></div> </div> days                                 | Mule Deer: <div></div> <div></div> <div></div> %<br>White-tailed Deer: <div></div> <div></div> <div></div> %<br><b>100% TOTAL</b> | <input type="checkbox"/> Yes, a Mule deer<br><input type="checkbox"/> Yes, a White-tailed deer<br><input type="checkbox"/> No ( <b>Skip to 3rd license</b> )   | <input type="checkbox"/> Adult Doe<br><input type="checkbox"/> Fawn (either sex) | <input type="checkbox"/> Rifle or Pistol<br><input type="checkbox"/> Muzzleloader<br><input type="checkbox"/> Archery |
| <b>3<sup>rd</sup> Doe/Fawn License</b> | <b>Main Hunt Area hunted:</b><br><div> <div></div><div></div><div></div> </div>               | <input type="checkbox"/> Yes<br><input type="checkbox"/> No                   | <div> <div></div><div></div> </div> days                                 | Mule Deer: <div></div> <div></div> <div></div> %<br>White-tailed Deer: <div></div> <div></div> <div></div> %<br><b>100% TOTAL</b> | <input type="checkbox"/> Yes, a Mule deer<br><input type="checkbox"/> Yes, a White-tailed deer<br><input type="checkbox"/> No ( <b>Skip to 2nd Hunt Area</b> ) | <input type="checkbox"/> Adult Doe<br><input type="checkbox"/> Fawn (either sex) | <input type="checkbox"/> Rifle or Pistol<br><input type="checkbox"/> Muzzleloader<br><input type="checkbox"/> Archery |
|                                        | <b>2nd Hunt Area hunted:</b><br><div> <div></div><div></div><div></div> </div>                | <input type="checkbox"/> Yes<br><input type="checkbox"/> No                   | <div> <div></div><div></div> </div> days                                 | Mule Deer: <div></div> <div></div> <div></div> %<br>White-tailed Deer: <div></div> <div></div> <div></div> %<br><b>100% TOTAL</b> | <input type="checkbox"/> Yes, a Mule deer<br><input type="checkbox"/> Yes, a White-tailed deer<br><input type="checkbox"/> No ( <b>Skip to 4th license</b> )   | <input type="checkbox"/> Adult Doe<br><input type="checkbox"/> Fawn (either sex) | <input type="checkbox"/> Rifle or Pistol<br><input type="checkbox"/> Muzzleloader<br><input type="checkbox"/> Archery |
| <b>4<sup>th</sup> Doe/Fawn License</b> | <b>Main Hunt Area hunted:</b><br><div> <div></div><div></div><div></div> </div>               | <input type="checkbox"/> Yes<br><input type="checkbox"/> No                   | <div> <div></div><div></div> </div> days                                 | Mule Deer: <div></div> <div></div> <div></div> %<br>White-tailed Deer: <div></div> <div></div> <div></div> %<br><b>100% TOTAL</b> | <input type="checkbox"/> Yes, a Mule deer<br><input type="checkbox"/> Yes, a White-tailed deer<br><input type="checkbox"/> No ( <b>Skip to 2nd Hunt Area</b> ) | <input type="checkbox"/> Adult Doe<br><input type="checkbox"/> Fawn (either sex) | <input type="checkbox"/> Rifle or Pistol<br><input type="checkbox"/> Muzzleloader<br><input type="checkbox"/> Archery |
|                                        | <b>2nd Hunt Area hunted:</b><br><div> <div></div><div></div><div></div> </div>                | <input type="checkbox"/> Yes<br><input type="checkbox"/> No                   | <div> <div></div><div></div> </div> days                                 | Mule Deer: <div></div> <div></div> <div></div> %<br>White-tailed Deer: <div></div> <div></div> <div></div> %<br><b>100% TOTAL</b> | <input type="checkbox"/> Yes, a Mule deer<br><input type="checkbox"/> Yes, a White-tailed deer<br><input type="checkbox"/> No ( <b>Skip to Q10</b> )           | <input type="checkbox"/> Adult Doe<br><input type="checkbox"/> Fawn (either sex) | <input type="checkbox"/> Rifle or Pistol<br><input type="checkbox"/> Muzzleloader<br><input type="checkbox"/> Archery |

\*Note: Hunt Area map can be found on the back of the survey cover letter

\*\*Note: Please count each partial day of hunting as 1 day of Deer hunting

**OVER →**



## Private Lands Public Wildlife Access Program

In 1997, the Wyoming Game and Fish Department began the Private Lands Public Wildlife Access Program (PLPW) to improve public hunting and fishing access on private and land-locked public lands through the **Walk-in Area** and **Hunter Management Area** programs. Your response to the following questions will help the Department improve this program to better serve hunters.

**Q10.** Did you hunt Deer on any of the PLPW Walk-in Areas or Hunter Management Areas during the 2007 season? (**NOTE:** Walk-in Areas are open to hunting without a permission slip, but a permission slip is needed for Hunter Management Areas)

☐ Yes

☐ No (**Skip to Q15**)

☐ Don't know (**Skip to Q15**)

**Q11.** How many different days did you hunt Deer on PLPW Walk-in Areas or Hunter Management Areas during the 2007 season? (**NOTE:** Count each partial day of hunting as 1 day of Deer hunting) (Enter number in space below; if no days, write 0)



Days hunted in **Walk-in Areas**



Days hunted in **Hunter Management Areas**

**Q12.** On how many different PLPW Walk-in Areas or Hunter Management Areas did you hunt Deer during the 2007 season? (If no areas, write 0)



Different **Walk-in Areas**



Different **Hunter Management Areas**

**Q13.** Overall, how satisfied were you with the opportunity Wyoming Game and Fish provided through the PLPW Walk-in Area and Hunter Management Area programs? (check one box below)

Very  
Satisfied

☐

Satisfied

☐

Neutral

☐

Dissatisfied

☐

Very  
Dissatisfied

☐

**Q14.** If you were dissatisfied, why?

---

## Other 2007 Big Game Licenses

**Q15.** What other 2007 Wyoming big game licenses did you hold? (Check all that apply)

☐ Pronghorn

☐ Black Bear

☐ Elk

☐ Mountain Lion

☐ No other big game license

**Thank you for your help with this important study!**

COMMENTS: Feel free to attach a sheet of paper with any comments you would like to share with the Wyoming Game and Fish Department. **Please include the hunt area as well as the species hunted with your comments.** These comments along with your contact information will be sent directly to the Wyoming Game and Fish Department.

(**NOTE:** individual responses to survey questions are confidential and will not be shared with the Wyoming Game and Fish Department)

**Please return your completed survey in the enclosed, postage-paid envelope to:**

**Wyoming Big Game Hunter Survey, c/o PA Consulting Group, 6410 Enterprise Lane, Suite 300, Madison WI 53719**

password:

6 6

22023784

9095506633

# 2007 WYOMING ELK HUNTER SURVEY

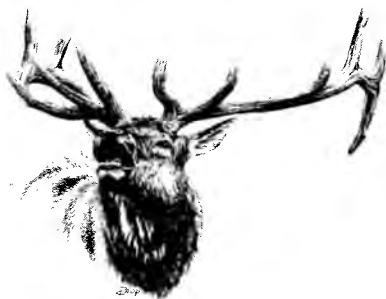

If you prefer to fill out the survey on the Internet ([www.wyhunter.org/elk](http://www.wyhunter.org/elk)), please use the 8-digit password on the back of this survey.

If you have questions about the survey or prefer to complete it over the phone, please contact Chris Mayhew at 1-800-216-0477 or e-mail: [chris.mayhew@paconsulting.com](mailto:chris.mayhew@paconsulting.com)

Please complete this survey after you have finished hunting or decided not to hunt Elk for the season.

**Q1.** Did you hunt Elk in Wyoming during the 2007 season? (*Check one box*)

☐ Yes ☐ No (**IF YOU DID NOT HUNT ELK DURING THE 2007 SEASON, SKIP TO Q15**)

**Q2.** How many **different** days did you hunt Elk in Wyoming during the 2007 season? (**NOTE:** Count each partial day of hunting as 1 day of Elk hunting) (*Enter number in space below*)

 

Number of different days

**Q3.** Please indicate your satisfaction when hunting Elk in Wyoming during the 2007 season. (*Check one box for each question below*)

|                                                                                                            | Very<br>Satisfied        | Satisfied                | Neutral                  | Dissatisfied             | Very<br>Dissatisfied     | Not<br>Applicable        |
|------------------------------------------------------------------------------------------------------------|--------------------------|--------------------------|--------------------------|--------------------------|--------------------------|--------------------------|
| How satisfied were you with the overall quality of your hunt.....                                          | <input type="checkbox"/> |
| If you were contacted by WY Game and Fish personnel while you were in the field, rate your experience..... | <input type="checkbox"/> |

**Q4.** What was the PRIMARY weapon you used to hunt Elk in Wyoming during the 2007 season? (*This would be the weapon you used the most amount of time to hunt Elk and may or may not be the weapon you actually used to harvest an Elk*) (*Check one box only*)

☐ Rifle or Pistol ☐ Muzzleloader ☐ Archery (**Skip to Q6**)

**Q5.** Did you hunt Elk with archery equipment in Wyoming during the 2007 season? (*Check one box*)

☐ Yes ☐ No (**Skip to Q8**)

**Q6.** What type of archery equipment did you use during the 2007 Elk season? (Check all that apply)

☐ Compound bow      ☐ Recurve bow      ☐ Long bow      ☐ Crossbow

**Q7.** How many **different** days did you hunt Elk with archery equipment in Wyoming during the 2007 archery and gun seasons? (**NOTE:** Count each partial day of hunting as 1 day of Elk hunting) (Enter number in space below)

|  |  |
|--|--|
|  |  |
|--|--|

Number of different days hunted with archery equipment during the archery-only season

|  |  |
|--|--|
|  |  |
|--|--|

Number of different days hunted with archery equipment during the gun season

### 2007 Elk Hunt Information

**Q8.** Did you hold a **FULL PRICE** Elk license? (Reminder: Full Price means General or Limited Quota regular, youth, pioneer or landowner Elk license other than Type 5, 6 or 7)

☐ Yes      ☐ No (Skip to Q9)

**Q8a.** Did you hunt with this **FULL PRICE** Elk license?

☐ Yes      ☐ No (Skip to Q9)

**Q8b.** Please fill in the table below for up to 3 Hunt Areas where you hunted with this **FULL PRICE** Elk license, even if you did not harvest with this license.

| Number of the Hunt Area(s) where you hunted* ( <b>Hunt Area numbers range from 1 to 130</b> )                                                                                                                                  | Did you hunt opening day of the gun season in this Hunt Area? (Check one box) | Number of different days hunted in this Hunt Area** (Enter number below) | Did you harvest an Elk in this Hunt Area? (Check one box) | Age/sex of Elk harvested in this Hunt Area (A mature bull is any branch-antlered bull; a calf includes both male and female calf) (Check one box) | Weapon used to harvest this Elk (Check one box)                                                                                                                     |  |  |                                                                                              |                                                                                                                                                    |                                                                                                                       |
|--------------------------------------------------------------------------------------------------------------------------------------------------------------------------------------------------------------------------------|-------------------------------------------------------------------------------|--------------------------------------------------------------------------|-----------------------------------------------------------|---------------------------------------------------------------------------------------------------------------------------------------------------|---------------------------------------------------------------------------------------------------------------------------------------------------------------------|--|--|----------------------------------------------------------------------------------------------|----------------------------------------------------------------------------------------------------------------------------------------------------|-----------------------------------------------------------------------------------------------------------------------|
| <b>Main Hunt Area hunted:</b><br><table border="1" style="display: inline-table; width: 60px; height: 30px;"> <tr> <td style="width: 20px;"></td> <td style="width: 20px;"></td> <td style="width: 20px;"></td> </tr> </table> |                                                                               |                                                                          |                                                           | <input type="checkbox"/> Yes<br><input type="checkbox"/> No                                                                                       | <table border="1" style="display: inline-table; width: 60px; height: 30px;"> <tr> <td style="width: 20px;"></td> <td style="width: 20px;"></td> </tr> </table> days |  |  | <input type="checkbox"/> Yes<br><input type="checkbox"/> No ( <b>Skip to 2nd Hunt Area</b> ) | <input type="checkbox"/> Mature Bull<br><input type="checkbox"/> Spike Bull<br><input type="checkbox"/> Adult Cow<br><input type="checkbox"/> Calf | <input type="checkbox"/> Rifle or Pistol<br><input type="checkbox"/> Muzzleloader<br><input type="checkbox"/> Archery |
|                                                                                                                                                                                                                                |                                                                               |                                                                          |                                                           |                                                                                                                                                   |                                                                                                                                                                     |  |  |                                                                                              |                                                                                                                                                    |                                                                                                                       |
|                                                                                                                                                                                                                                |                                                                               |                                                                          |                                                           |                                                                                                                                                   |                                                                                                                                                                     |  |  |                                                                                              |                                                                                                                                                    |                                                                                                                       |
| <b>2nd Hunt Area hunted:</b><br><table border="1" style="display: inline-table; width: 60px; height: 30px;"> <tr> <td style="width: 20px;"></td> <td style="width: 20px;"></td> <td style="width: 20px;"></td> </tr> </table>  |                                                                               |                                                                          |                                                           | <input type="checkbox"/> Yes<br><input type="checkbox"/> No                                                                                       | <table border="1" style="display: inline-table; width: 60px; height: 30px;"> <tr> <td style="width: 20px;"></td> <td style="width: 20px;"></td> </tr> </table> days |  |  | <input type="checkbox"/> Yes<br><input type="checkbox"/> No ( <b>Skip to 3rd Hunt Area</b> ) | <input type="checkbox"/> Mature Bull<br><input type="checkbox"/> Spike Bull<br><input type="checkbox"/> Adult Cow<br><input type="checkbox"/> Calf | <input type="checkbox"/> Rifle or Pistol<br><input type="checkbox"/> Muzzleloader<br><input type="checkbox"/> Archery |
|                                                                                                                                                                                                                                |                                                                               |                                                                          |                                                           |                                                                                                                                                   |                                                                                                                                                                     |  |  |                                                                                              |                                                                                                                                                    |                                                                                                                       |
|                                                                                                                                                                                                                                |                                                                               |                                                                          |                                                           |                                                                                                                                                   |                                                                                                                                                                     |  |  |                                                                                              |                                                                                                                                                    |                                                                                                                       |
| <b>3rd Hunt Area hunted:</b><br><table border="1" style="display: inline-table; width: 60px; height: 30px;"> <tr> <td style="width: 20px;"></td> <td style="width: 20px;"></td> <td style="width: 20px;"></td> </tr> </table>  |                                                                               |                                                                          |                                                           | <input type="checkbox"/> Yes<br><input type="checkbox"/> No                                                                                       | <table border="1" style="display: inline-table; width: 60px; height: 30px;"> <tr> <td style="width: 20px;"></td> <td style="width: 20px;"></td> </tr> </table> days |  |  | <input type="checkbox"/> Yes<br><input type="checkbox"/> No ( <b>Skip to Q9</b> )            | <input type="checkbox"/> Mature Bull<br><input type="checkbox"/> Spike Bull<br><input type="checkbox"/> Adult Cow<br><input type="checkbox"/> Calf | <input type="checkbox"/> Rifle or Pistol<br><input type="checkbox"/> Muzzleloader<br><input type="checkbox"/> Archery |
|                                                                                                                                                                                                                                |                                                                               |                                                                          |                                                           |                                                                                                                                                   |                                                                                                                                                                     |  |  |                                                                                              |                                                                                                                                                    |                                                                                                                       |
|                                                                                                                                                                                                                                |                                                                               |                                                                          |                                                           |                                                                                                                                                   |                                                                                                                                                                     |  |  |                                                                                              |                                                                                                                                                    |                                                                                                                       |

**\*Note:** Hunt Area map can be found on the back of the survey cover letter

**\*\*Note:** Please count each partial day of hunting as 1 day of Elk hunting

**Q9.** Did you hold a **Type 5, 6 or 7 Reduced Price COW/CALF** Elk license? (Reminder: all Reduced Price Elk licenses, including Reduced Price youth licenses and Type 5, 6 or 7 pioneer licenses, have a Type 5, 6 or 7 designation)

☐ Yes ☐ No (Skip to Q10)

**Q9a.** Did you hunt with this **Type 5, 6 or 7 Reduced Price COW/CALF** Elk license?

☐ Yes ☐ No (Skip to Q10)

**Q9b.** Please fill in the table below for up to 3 Hunt Areas where you hunted with this **Type 5, 6 or 7 Reduced Price COW/CALF** Elk license, even if you did not harvest with this license.

| Number of the Hunt Area(s) where you hunted* ( <b>Hunt Area numbers range from 1 to 130</b> )                                                                                                                                                                                                                                 | Did you hunt opening day of the gun season in this Hunt Area? (Check one box) | Number of different days hunted in this Hunt Area** (Enter number below)                                                                                                                           | Did you harvest an Elk in this Hunt Area? (Check one box)                           | Age/sex of Elk harvested in this Hunt Area (A calf includes both a male and female calf) (Check one box) | Weapon used to harvest this Elk (Check one box)                                                                       |
|-------------------------------------------------------------------------------------------------------------------------------------------------------------------------------------------------------------------------------------------------------------------------------------------------------------------------------|-------------------------------------------------------------------------------|----------------------------------------------------------------------------------------------------------------------------------------------------------------------------------------------------|-------------------------------------------------------------------------------------|----------------------------------------------------------------------------------------------------------|-----------------------------------------------------------------------------------------------------------------------|
| <b>Main Hunt Area hunted:</b><br><div style="border: 1px solid black; width: 40px; height: 20px; display: inline-block;"></div> <div style="border: 1px solid black; width: 40px; height: 20px; display: inline-block;"></div> <div style="border: 1px solid black; width: 40px; height: 20px; display: inline-block;"></div> | <input type="checkbox"/> Yes<br><input type="checkbox"/> No                   | <div style="border: 1px solid black; width: 40px; height: 20px; display: inline-block;"></div> <div style="border: 1px solid black; width: 40px; height: 20px; display: inline-block;"></div> days | <input type="checkbox"/> Yes<br><input type="checkbox"/> No (Skip to 2nd Hunt Area) | <input type="checkbox"/> Adult Cow<br><input type="checkbox"/> Calf                                      | <input type="checkbox"/> Rifle or Pistol<br><input type="checkbox"/> Muzzleloader<br><input type="checkbox"/> Archery |
| <b>2nd Hunt Area hunted:</b><br><div style="border: 1px solid black; width: 40px; height: 20px; display: inline-block;"></div> <div style="border: 1px solid black; width: 40px; height: 20px; display: inline-block;"></div> <div style="border: 1px solid black; width: 40px; height: 20px; display: inline-block;"></div>  | <input type="checkbox"/> Yes<br><input type="checkbox"/> No                   | <div style="border: 1px solid black; width: 40px; height: 20px; display: inline-block;"></div> <div style="border: 1px solid black; width: 40px; height: 20px; display: inline-block;"></div> days | <input type="checkbox"/> Yes<br><input type="checkbox"/> No (Skip to 3rd Hunt Area) | <input type="checkbox"/> Adult Cow<br><input type="checkbox"/> Calf                                      | <input type="checkbox"/> Rifle or Pistol<br><input type="checkbox"/> Muzzleloader<br><input type="checkbox"/> Archery |
| <b>3rd Hunt Area hunted:</b><br><div style="border: 1px solid black; width: 40px; height: 20px; display: inline-block;"></div> <div style="border: 1px solid black; width: 40px; height: 20px; display: inline-block;"></div> <div style="border: 1px solid black; width: 40px; height: 20px; display: inline-block;"></div>  | <input type="checkbox"/> Yes<br><input type="checkbox"/> No                   | <div style="border: 1px solid black; width: 40px; height: 20px; display: inline-block;"></div> <div style="border: 1px solid black; width: 40px; height: 20px; display: inline-block;"></div> days | <input type="checkbox"/> Yes<br><input type="checkbox"/> No (Skip to Q10)           | <input type="checkbox"/> Adult Cow<br><input type="checkbox"/> Calf                                      | <input type="checkbox"/> Rifle or Pistol<br><input type="checkbox"/> Muzzleloader<br><input type="checkbox"/> Archery |

**\*Note:** Hunt Area map can be found on the back of the survey cover letter

**\*\*Note:** Please count each partial day of hunting as 1 day of Elk hunting

## Private Lands Public Wildlife Access Program

In 1997, the Wyoming Game and Fish Department began the Private Lands Public Wildlife Access Program (PLPW) to improve public hunting and fishing access on private and land-locked public lands through the **Walk-in Area** and **Hunter Management Area** programs. Your response to the following questions will help the Department improve this program to better serve hunters.

**Q10.** Did you hunt Elk on any of the PLPW Walk-in Areas or Hunter Management Areas during the 2007 season? (**NOTE:** Walk-in Areas are open to hunting without a permission slip, but a permission slip is needed for Hunter Management Areas)

☐ Yes

☐ No (**Skip to Q15**)

☐ Don't know (**Skip to Q15**)

**Q11.** How many different days did you hunt Elk on PLPW Walk-in Areas or Hunter Management Areas during the 2007 season? (**NOTE:** Count each partial day of hunting as 1 day of Elk hunting) (Enter number in space below; if no days, write 0)

Days hunted in **Walk-in Areas**

Days hunted in **Hunter Management Areas**

**Q12.** On how many different PLPW Walk-in Areas or Hunter Management Areas did you hunt Elk during the 2007 season? (If no areas, write 0)

Different **Walk-in Areas**

Different **Hunter Management Areas**

**Q13.** Overall, how satisfied were you with the opportunity Wyoming Game and Fish provided through the PLPW Walk-in Area and Hunter Management Area programs? (check one box below)

Very  
Satisfied

☐

Satisfied

☐

Neutral

☐

Dissatisfied

☐

Very  
Dissatisfied

☐

**Q14.** If you were dissatisfied, why?

---

## Other 2007 Big Game Licenses

**Q15.** What other 2007 Wyoming big game licenses did you hold? (Check all that apply)

☐ Pronghorn

☐ Black Bear

☐ Deer

☐ Mountain Lion

☐ No other big game license

**Thank you for your help with this important study!**

COMMENTS: Feel free to attach a sheet of paper with any comments you would like to share with the Wyoming Game and Fish Department. **Please include the hunt area as well as the species hunted with your comments.** These comments along with your contact information will be sent directly to the Wyoming Game and Fish Department.

(**NOTE:** individual responses to survey questions are confidential and will not be shared with the Wyoming Game and Fish Department)

Please return your completed survey in the enclosed, postage-paid envelope to:  
Wyoming Big Game Hunter Survey, c/o PA Consulting Group, 6410 Enterprise Lane, Suite 300, Madison WI 53719

password:

94 1 95 7

31999980

2195155930

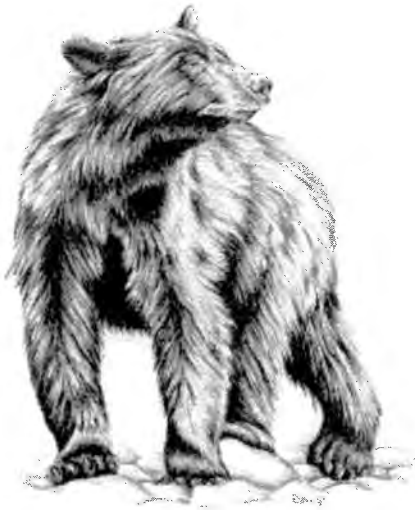

# 2007 WYOMING BLACK BEAR HUNTER SURVEY

If you prefer to fill out the survey on the Internet  
([www.wyhunter.org/blackbear](http://www.wyhunter.org/blackbear)),  
please use the 8-digit password on the back of this survey.

If you have questions about the survey or prefer to complete it over  
the phone, please contact Chris Mayhew at 1-800-216-0477 or  
e-mail: [chris.mayhew@paconsulting.com](mailto:chris.mayhew@paconsulting.com)

Please complete this survey after the fall 2007 Black Bear season or after you decided not to hunt Black Bear for the season.

**Q1.** Did you hunt Black Bear in Wyoming at any time during 2007? *(Check one box)*

☐ Yes ☐ No ***(IF YOU DID NOT HUNT BLACK BEAR DURING 2007, SKIP TO Q12)***

**Q2.** Please indicate your satisfaction when hunting Black Bear in Wyoming during 2007.  
*(Check one box for each question below)*

|                                                                                                                  | Very<br>Satisfied        | Satisfied                | Neutral                  | Dissatisfied             | Very<br>Dissatisfied     | Not<br>Applicable        |
|------------------------------------------------------------------------------------------------------------------|--------------------------|--------------------------|--------------------------|--------------------------|--------------------------|--------------------------|
| How satisfied were you with the<br>overall quality of your hunt.....                                             | <input type="checkbox"/> |
| If you were contacted by WY Game<br>and Fish personnel while you were in<br>the field, rate your experience..... | <input type="checkbox"/> |

**Q3.** Did you hunt Black Bear with archery equipment in Wyoming during 2007? *(Check one box)*

☐ Yes ☐ No ***(Skip to Q6)***

**Q4.** What type of archery equipment did you use to hunt Black Bear during 2007? *(Check all that apply)*

☐ Compound bow ☐ Recurve bow ☐ Long bow ☐ Crossbow

**Q5.** How many **different** days did you hunt Black Bear with archery equipment in Wyoming during the 2007 archery and gun seasons? ***(NOTE: Count each partial day of hunting as 1 day of Black Bear hunting)*** *(Enter number in space below)*

|  |  |
|--|--|
|  |  |
|--|--|

Number of different days hunted with archery equipment during the archery-only season

|  |  |
|--|--|
|  |  |
|--|--|

Number of different days hunted with archery equipment during the gun season

## Spring 2007 Black Bear Hunting Experiences

**Q6.** Did you hunt Black Bear in Wyoming during the spring of 2007? (Check one box)

☐ Yes

☐ No (Skip to Q9)

**Q7.** How many **different** days did you hunt Black Bear during the spring of 2007? (**NOTE:** Count each partial day of hunting as 1 day of Black Bear hunting) (Enter number in space below)

|  |  |
|--|--|
|  |  |
|--|--|

Number of different days you hunted Black Bear in the spring of 2007

**Q8.** Please tell us about your Black Bear hunting effort during the spring of 2007. (Fill in the table below for each Hunt Area hunted)

| Number of the Hunt Area(s) where you hunted Black Bear during the spring of 2007* (Hunt Area numbers range from 1 to 32)                                                                                                                                          | Number of different days you hunted Black Bear in this Hunt Area during the spring of 2007** (Enter number below) | Did you harvest a Black Bear during the spring of 2007 in this Hunt Area? (Check one box) | Weapon used to harvest this Bear (Check one box) |                                                                                                                                                                                                 |  |  |                                                                                     |                                                                                                                       |
|-------------------------------------------------------------------------------------------------------------------------------------------------------------------------------------------------------------------------------------------------------------------|-------------------------------------------------------------------------------------------------------------------|-------------------------------------------------------------------------------------------|--------------------------------------------------|-------------------------------------------------------------------------------------------------------------------------------------------------------------------------------------------------|--|--|-------------------------------------------------------------------------------------|-----------------------------------------------------------------------------------------------------------------------|
| Main Hunt Area hunted:<br><table border="1" style="display: inline-table; width: 60px; height: 25px;"> <tr> <td style="width: 20px; height: 25px;"></td> <td style="width: 20px; height: 25px;"></td> <td style="width: 20px; height: 25px;"></td> </tr> </table> |                                                                                                                   |                                                                                           |                                                  | <table border="1" style="display: inline-table; width: 60px; height: 25px;"> <tr> <td style="width: 20px; height: 25px;"></td> <td style="width: 20px; height: 25px;"></td> </tr> </table> days |  |  | <input type="checkbox"/> Yes<br><input type="checkbox"/> No (Skip to 2nd Hunt Area) | <input type="checkbox"/> Rifle or Pistol<br><input type="checkbox"/> Muzzleloader<br><input type="checkbox"/> Archery |
|                                                                                                                                                                                                                                                                   |                                                                                                                   |                                                                                           |                                                  |                                                                                                                                                                                                 |  |  |                                                                                     |                                                                                                                       |
|                                                                                                                                                                                                                                                                   |                                                                                                                   |                                                                                           |                                                  |                                                                                                                                                                                                 |  |  |                                                                                     |                                                                                                                       |
| 2nd Hunt Area hunted:<br><table border="1" style="display: inline-table; width: 60px; height: 25px;"> <tr> <td style="width: 20px; height: 25px;"></td> <td style="width: 20px; height: 25px;"></td> <td style="width: 20px; height: 25px;"></td> </tr> </table>  |                                                                                                                   |                                                                                           |                                                  | <table border="1" style="display: inline-table; width: 60px; height: 25px;"> <tr> <td style="width: 20px; height: 25px;"></td> <td style="width: 20px; height: 25px;"></td> </tr> </table> days |  |  | <input type="checkbox"/> Yes<br><input type="checkbox"/> No (Skip to 3rd Hunt Area) | <input type="checkbox"/> Rifle or Pistol<br><input type="checkbox"/> Muzzleloader<br><input type="checkbox"/> Archery |
|                                                                                                                                                                                                                                                                   |                                                                                                                   |                                                                                           |                                                  |                                                                                                                                                                                                 |  |  |                                                                                     |                                                                                                                       |
|                                                                                                                                                                                                                                                                   |                                                                                                                   |                                                                                           |                                                  |                                                                                                                                                                                                 |  |  |                                                                                     |                                                                                                                       |
| 3rd Hunt Area hunted:<br><table border="1" style="display: inline-table; width: 60px; height: 25px;"> <tr> <td style="width: 20px; height: 25px;"></td> <td style="width: 20px; height: 25px;"></td> <td style="width: 20px; height: 25px;"></td> </tr> </table>  |                                                                                                                   |                                                                                           |                                                  | <table border="1" style="display: inline-table; width: 60px; height: 25px;"> <tr> <td style="width: 20px; height: 25px;"></td> <td style="width: 20px; height: 25px;"></td> </tr> </table> days |  |  | <input type="checkbox"/> Yes<br><input type="checkbox"/> No (Skip to 4th Hunt Area) | <input type="checkbox"/> Rifle or Pistol<br><input type="checkbox"/> Muzzleloader<br><input type="checkbox"/> Archery |
|                                                                                                                                                                                                                                                                   |                                                                                                                   |                                                                                           |                                                  |                                                                                                                                                                                                 |  |  |                                                                                     |                                                                                                                       |
|                                                                                                                                                                                                                                                                   |                                                                                                                   |                                                                                           |                                                  |                                                                                                                                                                                                 |  |  |                                                                                     |                                                                                                                       |
| 4th Hunt Area hunted:<br><table border="1" style="display: inline-table; width: 60px; height: 25px;"> <tr> <td style="width: 20px; height: 25px;"></td> <td style="width: 20px; height: 25px;"></td> <td style="width: 20px; height: 25px;"></td> </tr> </table>  |                                                                                                                   |                                                                                           |                                                  | <table border="1" style="display: inline-table; width: 60px; height: 25px;"> <tr> <td style="width: 20px; height: 25px;"></td> <td style="width: 20px; height: 25px;"></td> </tr> </table> days |  |  | <input type="checkbox"/> Yes<br><input type="checkbox"/> No (Skip to 5th Hunt Area) | <input type="checkbox"/> Rifle or Pistol<br><input type="checkbox"/> Muzzleloader<br><input type="checkbox"/> Archery |
|                                                                                                                                                                                                                                                                   |                                                                                                                   |                                                                                           |                                                  |                                                                                                                                                                                                 |  |  |                                                                                     |                                                                                                                       |
|                                                                                                                                                                                                                                                                   |                                                                                                                   |                                                                                           |                                                  |                                                                                                                                                                                                 |  |  |                                                                                     |                                                                                                                       |
| 5th Hunt Area hunted:<br><table border="1" style="display: inline-table; width: 60px; height: 25px;"> <tr> <td style="width: 20px; height: 25px;"></td> <td style="width: 20px; height: 25px;"></td> <td style="width: 20px; height: 25px;"></td> </tr> </table>  |                                                                                                                   |                                                                                           |                                                  | <table border="1" style="display: inline-table; width: 60px; height: 25px;"> <tr> <td style="width: 20px; height: 25px;"></td> <td style="width: 20px; height: 25px;"></td> </tr> </table> days |  |  | <input type="checkbox"/> Yes<br><input type="checkbox"/> No (Skip to Q9)            | <input type="checkbox"/> Rifle or Pistol<br><input type="checkbox"/> Muzzleloader<br><input type="checkbox"/> Archery |
|                                                                                                                                                                                                                                                                   |                                                                                                                   |                                                                                           |                                                  |                                                                                                                                                                                                 |  |  |                                                                                     |                                                                                                                       |
|                                                                                                                                                                                                                                                                   |                                                                                                                   |                                                                                           |                                                  |                                                                                                                                                                                                 |  |  |                                                                                     |                                                                                                                       |

\*NOTE: Hunt Area map can be found on the back of the survey cover letter

\*\*NOTE: Please count each partial day of hunting as 1 day of Black Bear hunting

## Fall 2007 Black Bear Hunting Experiences

**Q9.** Did you hunt Black Bear in Wyoming during the fall of 2007? (Check one box)

☐ Yes

☐ No (Skip to Q12)

**Q10.** How many **different** days did you hunt Black Bear during the fall of 2007? (**NOTE:** Count each partial day of hunting as 1 day of Black Bear hunting) (Enter number in space below)

|  |  |
|--|--|
|  |  |
|--|--|

Number of different days you hunted Black Bear during the fall of 2007

**Q11.** Please tell us about your Black Bear hunting effort during the fall of 2007. (Fill in the table below for each Hunt Area hunted)

| Number of the Hunt Area(s) where you hunted Black Bear during the fall of 2007* (Hunt Area numbers range from 1 to 32)                                                                                                                                            | Number of different days you hunted Black Bear in this Hunt Area during the fall of 2007** (Enter number below) | Did you harvest a Black Bear during the fall of 2007 in this Hunt Area? (Check one box) | Weapon used to harvest this Bear (Check one box) |                                                                                                                                                                                                 |  |  |                                                                                     |                                                                                                                       |
|-------------------------------------------------------------------------------------------------------------------------------------------------------------------------------------------------------------------------------------------------------------------|-----------------------------------------------------------------------------------------------------------------|-----------------------------------------------------------------------------------------|--------------------------------------------------|-------------------------------------------------------------------------------------------------------------------------------------------------------------------------------------------------|--|--|-------------------------------------------------------------------------------------|-----------------------------------------------------------------------------------------------------------------------|
| Main Hunt Area hunted:<br><table border="1" style="display: inline-table; width: 60px; height: 30px;"> <tr> <td style="width: 20px; height: 30px;"></td> <td style="width: 20px; height: 30px;"></td> <td style="width: 20px; height: 30px;"></td> </tr> </table> |                                                                                                                 |                                                                                         |                                                  | <table border="1" style="display: inline-table; width: 60px; height: 30px;"> <tr> <td style="width: 30px; height: 30px;"></td> <td style="width: 30px; height: 30px;"></td> </tr> </table> days |  |  | <input type="checkbox"/> Yes<br><input type="checkbox"/> No (Skip to 2nd Hunt Area) | <input type="checkbox"/> Rifle or Pistol<br><input type="checkbox"/> Muzzleloader<br><input type="checkbox"/> Archery |
|                                                                                                                                                                                                                                                                   |                                                                                                                 |                                                                                         |                                                  |                                                                                                                                                                                                 |  |  |                                                                                     |                                                                                                                       |
|                                                                                                                                                                                                                                                                   |                                                                                                                 |                                                                                         |                                                  |                                                                                                                                                                                                 |  |  |                                                                                     |                                                                                                                       |
| 2nd Hunt Area hunted:<br><table border="1" style="display: inline-table; width: 60px; height: 30px;"> <tr> <td style="width: 20px; height: 30px;"></td> <td style="width: 20px; height: 30px;"></td> <td style="width: 20px; height: 30px;"></td> </tr> </table>  |                                                                                                                 |                                                                                         |                                                  | <table border="1" style="display: inline-table; width: 60px; height: 30px;"> <tr> <td style="width: 30px; height: 30px;"></td> <td style="width: 30px; height: 30px;"></td> </tr> </table> days |  |  | <input type="checkbox"/> Yes<br><input type="checkbox"/> No (Skip to 3rd Hunt Area) | <input type="checkbox"/> Rifle or Pistol<br><input type="checkbox"/> Muzzleloader<br><input type="checkbox"/> Archery |
|                                                                                                                                                                                                                                                                   |                                                                                                                 |                                                                                         |                                                  |                                                                                                                                                                                                 |  |  |                                                                                     |                                                                                                                       |
|                                                                                                                                                                                                                                                                   |                                                                                                                 |                                                                                         |                                                  |                                                                                                                                                                                                 |  |  |                                                                                     |                                                                                                                       |
| 3rd Hunt Area hunted:<br><table border="1" style="display: inline-table; width: 60px; height: 30px;"> <tr> <td style="width: 20px; height: 30px;"></td> <td style="width: 20px; height: 30px;"></td> <td style="width: 20px; height: 30px;"></td> </tr> </table>  |                                                                                                                 |                                                                                         |                                                  | <table border="1" style="display: inline-table; width: 60px; height: 30px;"> <tr> <td style="width: 30px; height: 30px;"></td> <td style="width: 30px; height: 30px;"></td> </tr> </table> days |  |  | <input type="checkbox"/> Yes<br><input type="checkbox"/> No (Skip to 4th Hunt Area) | <input type="checkbox"/> Rifle or Pistol<br><input type="checkbox"/> Muzzleloader<br><input type="checkbox"/> Archery |
|                                                                                                                                                                                                                                                                   |                                                                                                                 |                                                                                         |                                                  |                                                                                                                                                                                                 |  |  |                                                                                     |                                                                                                                       |
|                                                                                                                                                                                                                                                                   |                                                                                                                 |                                                                                         |                                                  |                                                                                                                                                                                                 |  |  |                                                                                     |                                                                                                                       |
| 4th Hunt Area hunted:<br><table border="1" style="display: inline-table; width: 60px; height: 30px;"> <tr> <td style="width: 20px; height: 30px;"></td> <td style="width: 20px; height: 30px;"></td> <td style="width: 20px; height: 30px;"></td> </tr> </table>  |                                                                                                                 |                                                                                         |                                                  | <table border="1" style="display: inline-table; width: 60px; height: 30px;"> <tr> <td style="width: 30px; height: 30px;"></td> <td style="width: 30px; height: 30px;"></td> </tr> </table> days |  |  | <input type="checkbox"/> Yes<br><input type="checkbox"/> No (Skip to 5th Hunt Area) | <input type="checkbox"/> Rifle or Pistol<br><input type="checkbox"/> Muzzleloader<br><input type="checkbox"/> Archery |
|                                                                                                                                                                                                                                                                   |                                                                                                                 |                                                                                         |                                                  |                                                                                                                                                                                                 |  |  |                                                                                     |                                                                                                                       |
|                                                                                                                                                                                                                                                                   |                                                                                                                 |                                                                                         |                                                  |                                                                                                                                                                                                 |  |  |                                                                                     |                                                                                                                       |
| 5th Hunt Area hunted:<br><table border="1" style="display: inline-table; width: 60px; height: 30px;"> <tr> <td style="width: 20px; height: 30px;"></td> <td style="width: 20px; height: 30px;"></td> <td style="width: 20px; height: 30px;"></td> </tr> </table>  |                                                                                                                 |                                                                                         |                                                  | <table border="1" style="display: inline-table; width: 60px; height: 30px;"> <tr> <td style="width: 30px; height: 30px;"></td> <td style="width: 30px; height: 30px;"></td> </tr> </table> days |  |  | <input type="checkbox"/> Yes<br><input type="checkbox"/> No (Skip to Q12)           | <input type="checkbox"/> Rifle or Pistol<br><input type="checkbox"/> Muzzleloader<br><input type="checkbox"/> Archery |
|                                                                                                                                                                                                                                                                   |                                                                                                                 |                                                                                         |                                                  |                                                                                                                                                                                                 |  |  |                                                                                     |                                                                                                                       |
|                                                                                                                                                                                                                                                                   |                                                                                                                 |                                                                                         |                                                  |                                                                                                                                                                                                 |  |  |                                                                                     |                                                                                                                       |

\*NOTE: Hunt Area map can be found on the back of the survey cover letter

\*\*NOTE: Please count each partial day of hunting as 1 day of Black Bear hunting

## Other 2007 Big Game Licenses

**Q12.** What other 2007 Wyoming big game licenses did you hold? (Check all that apply)

☐ Pronghorn

☐ Deer

☐ Elk

☐ Mountain Lion

☐ No other big game license

**OVER →**



**Thank you for your help with this important study!**

Feel free to attach a sheet of paper with any comments you would like to share with the Wyoming Game and Fish Department. **Please include the hunt area as well as the species hunted with your comments.** These comments along with your contact information will be sent directly to the Wyoming Game and Fish Department.

*(NOTE: individual responses to survey questions are confidential and will not be shared with the Wyoming Game and Fish Department)*

**Please return your completed survey in the enclosed, postage-paid envelope to:  
Wyoming Big Game Hunter Survey, c/o PA Consulting Group, 6410 Enterprise Lane, Suite 300, Madison WI 53719**

password:

**41999980**

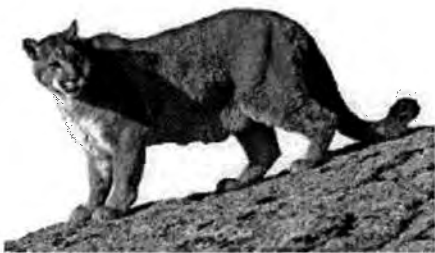

## 2007/2008 WYOMING MOUNTAIN LION HUNTER SURVEY

If you prefer to fill out the survey on the Internet ([www.wyhunter.org/mtlion](http://www.wyhunter.org/mtlion)), please use the 8-digit password on the back of this survey.

If you have questions about the survey or prefer to complete it over the phone, please contact Chris Mayhew at 1-800-216-0477 or e-mail: [chris.mayhew@paconsulting.com](mailto:chris.mayhew@paconsulting.com)

**Q1.** This survey is about hunting effort for Mountain Lion in Wyoming between September 1, 2007 and March 31, 2008. Did you hunt Mountain Lion during this time period? (*Check one box*)

☐ Yes      ☐ No (**IF YOU DID NOT HUNT MOUNTAIN LION BETWEEN SEPTEMBER 1, 2007 AND MARCH 31, 2008, SKIP TO Q17**)

**Q2.** Please indicate your satisfaction when hunting Mountain Lion in Wyoming between September 1, 2007 and March 31, 2008. (*Check one box for each question below*)

|                                                                                                                                                   | Very<br>Satisfied        | Satisfied                | Neutral                  | Dissatisfied             | Very<br>Dissatisfied     | Not<br>Applicable        |
|---------------------------------------------------------------------------------------------------------------------------------------------------|--------------------------|--------------------------|--------------------------|--------------------------|--------------------------|--------------------------|
| How satisfied were you with the overall quality of your hunt.....                                                                                 | <input type="checkbox"/> |
| If you were contacted by WY Game and Fish personnel in the field or if you registered a harvested Mountain Lion, please rate your experience..... | <input type="checkbox"/> |

**Q3.** Did you hunt Mountain Lion with archery equipment in Wyoming between September 1, 2007 and March 31, 2008? (*Check one box*)

☐ Yes      ☐ No (**Skip to Q5**)

**Q4.** What type of archery equipment did you use to hunt Mountain Lion between September 1, 2007 and March 31, 2008? (*Check all that apply*)

☐ Compound bow      ☐ Recurve bow      ☐ Long bow      ☐ Crossbow

**Q5.** Did you hunt Mountain Lion with dogs between September 1, 2007 and March 31, 2008? (*Check one box*)

☐ Yes      ☐ No

**Q6.** Did you use a guide or an outfitter to hunt Mountain Lion between September 1, 2007 and March 31, 2008? (*Check one box*)

☐ Yes      ☐ No

**Q7.** How many Mountain Lion did you see while hunting between September 1, 2007 and March 31, 2008? (*Enter number in space below*)

|  |  |
|--|--|
|  |  |
|--|--|

Number of Mountain Lion seen

- Q8.** How many separate sets of Mountain Lion tracks did you see while hunting Mountain Lion between September 1, 2007 and March 31, 2008? (Enter number in space below)

|  |  |
|--|--|
|  |  |
|--|--|

Separate sets of tracks

### 2007 MOUNTAIN LION LICENSE HOLDERS

- Q9.** Did you purchase a 2007 Mountain Lion license? (Check one box)

☐ Yes

☐ No (Skip to Q13)

- Q10.** Did you hunt Mountain Lion in Wyoming between September 1, 2007 and December 31, 2007? (Check one box)

☐ Yes

☐ No (IF YOU DID NOT HUNT MOUNTAIN LION DURING THIS TIME, SKIP TO Q13)

- Q11.** How many **different** days did you hunt Mountain Lion between September 1, 2007 and December 31, 2007? (**NOTE:** Count each partial day of hunting as 1 day of Mountain Lion hunting) (Enter number in space below)

|  |  |  |
|--|--|--|
|  |  |  |
|--|--|--|

Number of different days spent hunting Mountain Lion

- Q12.** Please tell us about your Mountain Lion hunting effort between September 1, 2007 and December 31, 2007. (Fill in table below for each Hunt Area hunted.)

| Number of the Hunt Area(s) where you hunted Mountain Lion during this period (hunt area numbers range from 1 to 31)* | Number of different days you hunted Mountain Lion in this Hunt Area during this period** (Enter number below) | Did you harvest a Mountain Lion during this period in this Hunt Area? (Check one box) | Sex of Mountain Lion harvested in this Hunt Area (Check one box) | Weapon used to harvest this Mountain Lion (Check one box)                 |  |  |  |                                                                                     |                                                                  |                                                                                                                       |
|----------------------------------------------------------------------------------------------------------------------|---------------------------------------------------------------------------------------------------------------|---------------------------------------------------------------------------------------|------------------------------------------------------------------|---------------------------------------------------------------------------|--|--|--|-------------------------------------------------------------------------------------|------------------------------------------------------------------|-----------------------------------------------------------------------------------------------------------------------|
| Main Hunt Area hunted:<br><table border="1"> <tr> <td></td> <td></td> <td></td> </tr> </table>                       |                                                                                                               |                                                                                       |                                                                  | <table border="1"> <tr> <td></td> <td></td> <td></td> </tr> </table> days |  |  |  | <input type="checkbox"/> Yes<br><input type="checkbox"/> No (Skip to 2nd Hunt Area) | <input type="checkbox"/> Male<br><input type="checkbox"/> Female | <input type="checkbox"/> Rifle or Pistol<br><input type="checkbox"/> Muzzleloader<br><input type="checkbox"/> Archery |
|                                                                                                                      |                                                                                                               |                                                                                       |                                                                  |                                                                           |  |  |  |                                                                                     |                                                                  |                                                                                                                       |
|                                                                                                                      |                                                                                                               |                                                                                       |                                                                  |                                                                           |  |  |  |                                                                                     |                                                                  |                                                                                                                       |
| 2nd Hunt Area hunted:<br><table border="1"> <tr> <td></td> <td></td> <td></td> </tr> </table>                        |                                                                                                               |                                                                                       |                                                                  | <table border="1"> <tr> <td></td> <td></td> <td></td> </tr> </table> days |  |  |  | <input type="checkbox"/> Yes<br><input type="checkbox"/> No (Skip to 3rd Hunt Area) | <input type="checkbox"/> Male<br><input type="checkbox"/> Female | <input type="checkbox"/> Rifle or Pistol<br><input type="checkbox"/> Muzzleloader<br><input type="checkbox"/> Archery |
|                                                                                                                      |                                                                                                               |                                                                                       |                                                                  |                                                                           |  |  |  |                                                                                     |                                                                  |                                                                                                                       |
|                                                                                                                      |                                                                                                               |                                                                                       |                                                                  |                                                                           |  |  |  |                                                                                     |                                                                  |                                                                                                                       |
| 3rd Hunt Area hunted:<br><table border="1"> <tr> <td></td> <td></td> <td></td> </tr> </table>                        |                                                                                                               |                                                                                       |                                                                  | <table border="1"> <tr> <td></td> <td></td> <td></td> </tr> </table> days |  |  |  | <input type="checkbox"/> Yes<br><input type="checkbox"/> No (Skip to 4th Hunt Area) | <input type="checkbox"/> Male<br><input type="checkbox"/> Female | <input type="checkbox"/> Rifle or Pistol<br><input type="checkbox"/> Muzzleloader<br><input type="checkbox"/> Archery |
|                                                                                                                      |                                                                                                               |                                                                                       |                                                                  |                                                                           |  |  |  |                                                                                     |                                                                  |                                                                                                                       |
|                                                                                                                      |                                                                                                               |                                                                                       |                                                                  |                                                                           |  |  |  |                                                                                     |                                                                  |                                                                                                                       |
| 4th Hunt Area hunted:<br><table border="1"> <tr> <td></td> <td></td> <td></td> </tr> </table>                        |                                                                                                               |                                                                                       |                                                                  | <table border="1"> <tr> <td></td> <td></td> <td></td> </tr> </table> days |  |  |  | <input type="checkbox"/> Yes<br><input type="checkbox"/> No (Skip to 5th Hunt Area) | <input type="checkbox"/> Male<br><input type="checkbox"/> Female | <input type="checkbox"/> Rifle or Pistol<br><input type="checkbox"/> Muzzleloader<br><input type="checkbox"/> Archery |
|                                                                                                                      |                                                                                                               |                                                                                       |                                                                  |                                                                           |  |  |  |                                                                                     |                                                                  |                                                                                                                       |
|                                                                                                                      |                                                                                                               |                                                                                       |                                                                  |                                                                           |  |  |  |                                                                                     |                                                                  |                                                                                                                       |
| 5th Hunt Area hunted:<br><table border="1"> <tr> <td></td> <td></td> <td></td> </tr> </table>                        |                                                                                                               |                                                                                       |                                                                  | <table border="1"> <tr> <td></td> <td></td> <td></td> </tr> </table> days |  |  |  | <input type="checkbox"/> Yes<br><input type="checkbox"/> No (Skip to Q13)           | <input type="checkbox"/> Male<br><input type="checkbox"/> Female | <input type="checkbox"/> Rifle or Pistol<br><input type="checkbox"/> Muzzleloader<br><input type="checkbox"/> Archery |
|                                                                                                                      |                                                                                                               |                                                                                       |                                                                  |                                                                           |  |  |  |                                                                                     |                                                                  |                                                                                                                       |
|                                                                                                                      |                                                                                                               |                                                                                       |                                                                  |                                                                           |  |  |  |                                                                                     |                                                                  |                                                                                                                       |

\*NOTE: Hunt Area map can be found on the back of the survey cover letter

\*\*NOTE: Please count each partial day of hunting as 1 day of Mountain Lion hunting

## 2008 MOUNTAIN LION LICENSE HOLDERS

**Q13.** Did you purchase a 2008 Mountain Lion license? (Check one box)

☐ Yes ☐ No (Skip to Q19)

**Q14.** Did you hunt Mountain Lion in Wyoming between January 1, 2008 and March 31, 2008?  
(Check one box)

☐ Yes ☐ No (IF YOU DID NOT HUNT MOUNTAIN LION DURING THIS TIME, SKIP TO Q17)

**Q15.** How many different days did you hunt Mountain Lion between January 1, 2008 and March 31, 2008?  
(NOTE: Count each partial day of hunting as 1 day of Mountain Lion hunting)

(Enter number in space below)

|  |  |  |
|--|--|--|
|  |  |  |
|--|--|--|

Number of different days spent hunting Mountain Lion

**Q16.** Please tell us about your Mountain Lion hunting effort between January 1, 2008 and March 31, 2008. (Fill in table below for each Hunt Area hunted.)

| Number of the Hunt Area(s) where you hunted Mountain Lion during this period (hunt area numbers range from 1 to 31)*                                                                                                                                                   | Number of different days you hunted Mountain Lion in this Hunt Area during this period** (Enter number below) | Did you harvest a Mountain Lion during this period in this Hunt Area? (Check one box) | Sex of Mountain Lion harvested in this Hunt Area (Check one box) | Weapon used to harvest this Mountain Lion (Check one box)                                                                                                                                                                                         |  |  |  |                                                                                     |                                                                  |                                                                                                                       |
|------------------------------------------------------------------------------------------------------------------------------------------------------------------------------------------------------------------------------------------------------------------------|---------------------------------------------------------------------------------------------------------------|---------------------------------------------------------------------------------------|------------------------------------------------------------------|---------------------------------------------------------------------------------------------------------------------------------------------------------------------------------------------------------------------------------------------------|--|--|--|-------------------------------------------------------------------------------------|------------------------------------------------------------------|-----------------------------------------------------------------------------------------------------------------------|
| Main Hunt Area hunted:<br><table border="1" style="border-collapse: collapse; width: 100px; height: 30px;"> <tr> <td style="width: 33px; height: 30px;"></td> <td style="width: 33px; height: 30px;"></td> <td style="width: 33px; height: 30px;"></td> </tr> </table> |                                                                                                               |                                                                                       |                                                                  | <table border="1" style="border-collapse: collapse; width: 100px; height: 30px;"> <tr> <td style="width: 33px; height: 30px;"></td> <td style="width: 33px; height: 30px;"></td> <td style="width: 33px; height: 30px;"></td> </tr> </table> days |  |  |  | <input type="checkbox"/> Yes<br><input type="checkbox"/> No (Skip to 2nd Hunt Area) | <input type="checkbox"/> Male<br><input type="checkbox"/> Female | <input type="checkbox"/> Rifle or Pistol<br><input type="checkbox"/> Muzzleloader<br><input type="checkbox"/> Archery |
|                                                                                                                                                                                                                                                                        |                                                                                                               |                                                                                       |                                                                  |                                                                                                                                                                                                                                                   |  |  |  |                                                                                     |                                                                  |                                                                                                                       |
|                                                                                                                                                                                                                                                                        |                                                                                                               |                                                                                       |                                                                  |                                                                                                                                                                                                                                                   |  |  |  |                                                                                     |                                                                  |                                                                                                                       |
| 2nd Hunt Area hunted:<br><table border="1" style="border-collapse: collapse; width: 100px; height: 30px;"> <tr> <td style="width: 33px; height: 30px;"></td> <td style="width: 33px; height: 30px;"></td> <td style="width: 33px; height: 30px;"></td> </tr> </table>  |                                                                                                               |                                                                                       |                                                                  | <table border="1" style="border-collapse: collapse; width: 100px; height: 30px;"> <tr> <td style="width: 33px; height: 30px;"></td> <td style="width: 33px; height: 30px;"></td> <td style="width: 33px; height: 30px;"></td> </tr> </table> days |  |  |  | <input type="checkbox"/> Yes<br><input type="checkbox"/> No (Skip to 3rd Hunt Area) | <input type="checkbox"/> Male<br><input type="checkbox"/> Female | <input type="checkbox"/> Rifle or Pistol<br><input type="checkbox"/> Muzzleloader<br><input type="checkbox"/> Archery |
|                                                                                                                                                                                                                                                                        |                                                                                                               |                                                                                       |                                                                  |                                                                                                                                                                                                                                                   |  |  |  |                                                                                     |                                                                  |                                                                                                                       |
|                                                                                                                                                                                                                                                                        |                                                                                                               |                                                                                       |                                                                  |                                                                                                                                                                                                                                                   |  |  |  |                                                                                     |                                                                  |                                                                                                                       |
| 3rd Hunt Area hunted:<br><table border="1" style="border-collapse: collapse; width: 100px; height: 30px;"> <tr> <td style="width: 33px; height: 30px;"></td> <td style="width: 33px; height: 30px;"></td> <td style="width: 33px; height: 30px;"></td> </tr> </table>  |                                                                                                               |                                                                                       |                                                                  | <table border="1" style="border-collapse: collapse; width: 100px; height: 30px;"> <tr> <td style="width: 33px; height: 30px;"></td> <td style="width: 33px; height: 30px;"></td> <td style="width: 33px; height: 30px;"></td> </tr> </table> days |  |  |  | <input type="checkbox"/> Yes<br><input type="checkbox"/> No (Skip to 4th Hunt Area) | <input type="checkbox"/> Male<br><input type="checkbox"/> Female | <input type="checkbox"/> Rifle or Pistol<br><input type="checkbox"/> Muzzleloader<br><input type="checkbox"/> Archery |
|                                                                                                                                                                                                                                                                        |                                                                                                               |                                                                                       |                                                                  |                                                                                                                                                                                                                                                   |  |  |  |                                                                                     |                                                                  |                                                                                                                       |
|                                                                                                                                                                                                                                                                        |                                                                                                               |                                                                                       |                                                                  |                                                                                                                                                                                                                                                   |  |  |  |                                                                                     |                                                                  |                                                                                                                       |
| 4th Hunt Area hunted:<br><table border="1" style="border-collapse: collapse; width: 100px; height: 30px;"> <tr> <td style="width: 33px; height: 30px;"></td> <td style="width: 33px; height: 30px;"></td> <td style="width: 33px; height: 30px;"></td> </tr> </table>  |                                                                                                               |                                                                                       |                                                                  | <table border="1" style="border-collapse: collapse; width: 100px; height: 30px;"> <tr> <td style="width: 33px; height: 30px;"></td> <td style="width: 33px; height: 30px;"></td> <td style="width: 33px; height: 30px;"></td> </tr> </table> days |  |  |  | <input type="checkbox"/> Yes<br><input type="checkbox"/> No (Skip to 5th Hunt Area) | <input type="checkbox"/> Male<br><input type="checkbox"/> Female | <input type="checkbox"/> Rifle or Pistol<br><input type="checkbox"/> Muzzleloader<br><input type="checkbox"/> Archery |
|                                                                                                                                                                                                                                                                        |                                                                                                               |                                                                                       |                                                                  |                                                                                                                                                                                                                                                   |  |  |  |                                                                                     |                                                                  |                                                                                                                       |
|                                                                                                                                                                                                                                                                        |                                                                                                               |                                                                                       |                                                                  |                                                                                                                                                                                                                                                   |  |  |  |                                                                                     |                                                                  |                                                                                                                       |
| 5th Hunt Area hunted:<br><table border="1" style="border-collapse: collapse; width: 100px; height: 30px;"> <tr> <td style="width: 33px; height: 30px;"></td> <td style="width: 33px; height: 30px;"></td> <td style="width: 33px; height: 30px;"></td> </tr> </table>  |                                                                                                               |                                                                                       |                                                                  | <table border="1" style="border-collapse: collapse; width: 100px; height: 30px;"> <tr> <td style="width: 33px; height: 30px;"></td> <td style="width: 33px; height: 30px;"></td> <td style="width: 33px; height: 30px;"></td> </tr> </table> days |  |  |  | <input type="checkbox"/> Yes<br><input type="checkbox"/> No (Skip to Q17)           | <input type="checkbox"/> Male<br><input type="checkbox"/> Female | <input type="checkbox"/> Rifle or Pistol<br><input type="checkbox"/> Muzzleloader<br><input type="checkbox"/> Archery |
|                                                                                                                                                                                                                                                                        |                                                                                                               |                                                                                       |                                                                  |                                                                                                                                                                                                                                                   |  |  |  |                                                                                     |                                                                  |                                                                                                                       |
|                                                                                                                                                                                                                                                                        |                                                                                                               |                                                                                       |                                                                  |                                                                                                                                                                                                                                                   |  |  |  |                                                                                     |                                                                  |                                                                                                                       |

\*NOTE: Hunt Area map can be found on the back of the survey cover letter

\*\*NOTE: Please count each partial day of hunting as 1 day of Mountain Lion hunting

**OVER →**

**Q17.** If you have not yet hunted or harvested, do you still plan to hunt Mountain Lion between April 1, 2008 and August 31, 2008? (Check one box)

☐ Yes

☐ No (Skip to Q19)

**Q18.** Approximately how many days do you plan to hunt Mountain Lion between April 1, 2008 and August 31, 2008?

|  |  |  |
|--|--|--|
|  |  |  |
|--|--|--|

Number of different days spent hunting Mountain Lion

### OTHER BIG GAME LICENSES

**Q19.** What other 2007 Wyoming big game licenses did you hold? (Check all that apply)

☐ Pronghorn

☐ Deer

☐ Elk

☐ Black Bear

☐ No other big game license

### Thank you for your help with this important study!

Feel free to attach a sheet of paper with any comments you would like to share with the Wyoming Game and Fish Department. **Please include the hunt area as well as the species hunted with your comments.** These comments along with your contact information will be sent directly to the Wyoming Game and Fish Department.

(**NOTE:** individual responses to survey questions are confidential and will not be shared with the Wyoming Game and Fish Department)

Please return your completed survey in the enclosed, postage-paid envelope to:

Wyoming Big Game Hunter Survey, c/o PA Consulting Group, 6410 Enterprise Lane, Suite 300, Madison WI 53719

### Did you know.....

(1) The Wyoming Game and Fish Department offers mountain lion education and identification information and an exam to aid hunters, guides, outfitters, houndsmen, and all others in correctly identifying male and female mountain lions in the field. The information and exam can be found at:  
<http://gf.state.wy.us/mountainlion/index.asp>

(2) The Wyoming Game and Fish Department is managing Mountain Lion according to Mountain Lion Management plan. The Final Mountain Lion Management Plan released by Wyoming Game and Fish can be found at:  
<http://gf.state.wy.us/wildlife/MountainLionPlan/index.asp>

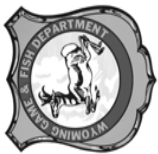

## WGFD MOOSE HARVEST SURVEY

Wyoming Game and Fish Department  
Biological Services  
5400 Bishop Blvd  
Cheyenne, WY 82006-0001

First Class  
US Postage Paid  
Cheyenne, WY  
Permit #196

Dear Hunter, We are asking you to participate in the 2007 Wyoming Game and Fish Department Moose Harvest Survey. Our biologists use the results of this survey to monitor populations and recommend hunting seasons. Your responses are confidential and are very important **even if you did not hunt or were unsuccessful**.

You may complete this survey in one of two ways: via the internet go to <http://gfd.state.wy.us/HarvestSurvey/> and use the **Hunter Key** as it appears on the top of the attached survey postcard  
OR complete the survey postcard, detach it and mail it back to us, the postage is paid.

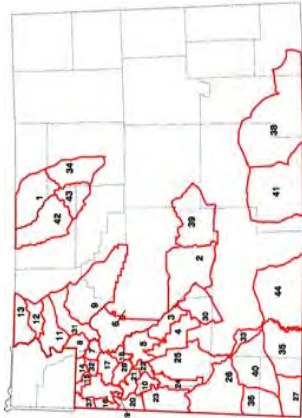

All surveys will be destroyed after the harvest survey has been completed. We appreciate your assistance with the survey and thank you for your help.

### MOOSE HUNT AREA MAP

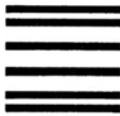

NO POSTAGE  
NECESSARY  
IF MAILED  
IN THE  
UNITED STATES

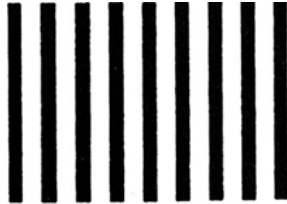

**BUSINESS REPLY MAIL**  
FIRST CLASS PERMIT NO. 661 CHEYENNE, WY

POSTAGE WILL BE PAID BY ADDRESSEE

WYOMING GAME & FISH DEPARTMENT  
BIOLOGICAL SERVICES  
5400 BISHOP BLVD  
CHEYENNE WY 82010-0023

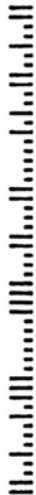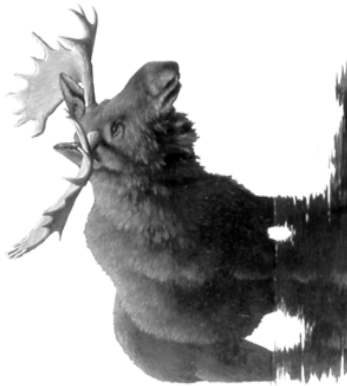

### HUNTER KEY

Did you hunt moose? ☐ yes ☐ no (if "no" - skip to comments section below)

| hunt area<br>you hunted<br>(see map)                  | total # of<br>days hunting<br>moose | Did you<br>harvest a<br>moose? | harvested                                                     | weapon used<br>to harvest        | date of<br>harvest |
|-------------------------------------------------------|-------------------------------------|--------------------------------|---------------------------------------------------------------|----------------------------------|--------------------|
| Enter # of<br>days hunted<br>with each<br>weapon type | firearm                             | <input type="checkbox"/> yes   | <input type="checkbox"/> bull                                 | <input type="checkbox"/> firearm |                    |
|                                                       |                                     | <input type="checkbox"/> no    | <input type="checkbox"/> cow<br><input type="checkbox"/> calf | <input type="checkbox"/> archery |                    |
| compound<br>bow                                       |                                     |                                | crossbow                                                      | recurved bow                     | long bow           |
|                                                       |                                     |                                |                                                               |                                  |                    |

Approximately, how many moose did you see during your hunt?

COMMENTS:

---

---

---

---

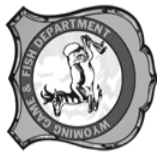

## WGFD BIGHORN SHEEP HARVEST SURVEY

Dear Hunter, We are asking you to participate in the 2007 Wyoming Game and Fish Department Bighorn Sheep Harvest Survey. Our biologists use the results of this survey to monitor populations and recommend hunting seasons. Your responses are confidential and are very important **even if you registered your sheep, did not hunt or were unsuccessful.**

You may complete this survey in one of two ways: via the internet go to <http://gf.state.wy.us/HarvestSurvey/> and use the **Hunter Key** as it appears on the top of the attached survey postcard  
OR complete the survey postcard, detach it and mail it back to us, the postage is paid.

All surveys will be destroyed after the harvest survey has been completed. We appreciate your assistance with the survey and thank you for your help.

### BIGHORN SHEEP HUNT AREA MAP

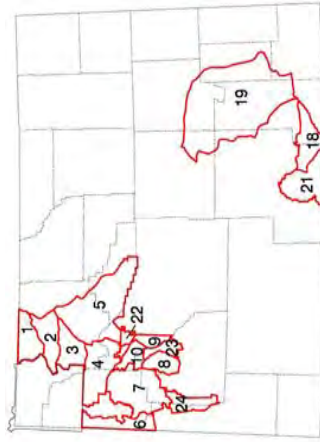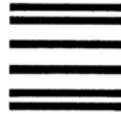

NO POSTAGE  
NECESSARY  
IF MAILED  
IN THE  
UNITED STATES

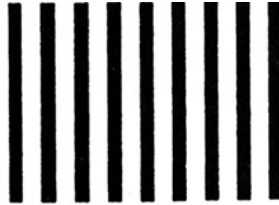

### BUSINESS REPLY MAIL

FIRST CLASS PERMIT NO. 661 CHEYENNE, WY

POSTAGE WILL BE PAID BY ADDRESSEE

WYOMING GAME & FISH DEPARTMENT  
BIOLOGICAL SERVICES  
5400 BISHOP BLVD  
CHEYENNE WY 82010-0023

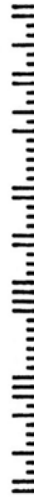

Wyoming Game and Fish Department  
Biological Services  
5400 Bishop Blvd  
Cheyenne, WY 82006-0001

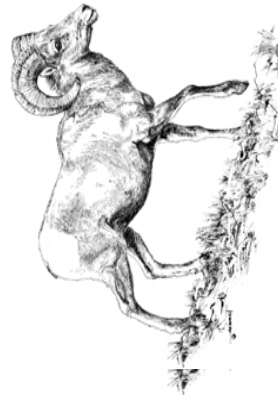

### HUNTER KEY

Did you hunt bighorn sheep? ☐ yes ☐ no (if "no" - skip to comments section below)

| hunt area<br>you hunted<br>(see map)                  | total # of<br>days hunting<br>sheep | Did you harvest<br>a sheep?  | harvested                    | weapon used<br>to harvest        | date of<br>harvest       |
|-------------------------------------------------------|-------------------------------------|------------------------------|------------------------------|----------------------------------|--------------------------|
| <input type="checkbox"/>                              | <input type="checkbox"/>            | <input type="checkbox"/> yes | <input type="checkbox"/> ram | <input type="checkbox"/> firearm | <input type="checkbox"/> |
|                                                       |                                     | <input type="checkbox"/> no  | <input type="checkbox"/> ewe | <input type="checkbox"/> archery | <input type="checkbox"/> |
| Enter # of<br>days hunted<br>with each<br>weapon type | firearm                             | compound bow                 | crossbow                     | recurved bow                     | long bow                 |
|                                                       |                                     |                              |                              | <input type="checkbox"/>         | <input type="checkbox"/> |

Approximately, how many sheep did you see during your hunt? ☐

COMMENTS:

---

---

---

---





TABLE I  
**ANTELOPE**  
**HARVEST STATEWIDE**  
 BY TOTAL HUNTERS  
**2007**

|             | LICENSES<br>SOLD | NUMBER<br>ACTIVE<br>HUNTERS | HARVEST |        |       |        | TOTAL<br>RECREATION<br>DAYS | HUNTER<br>SUCCESS | DAYS/<br>HARVEST |
|-------------|------------------|-----------------------------|---------|--------|-------|--------|-----------------------------|-------------------|------------------|
|             |                  |                             | BUCK    | DOE    | FAWN  | TOTAL  |                             |                   |                  |
| STATE TOTAL | 65,397           | 52,744                      | 30,345  | 19,076 | 2,462 | 51,883 | 169,419                     | 98.4%             | 3.3              |
| RESIDENT    | 25,377           | 20,269                      | 13,101  | 5,058  | 609   | 18,768 | 66,858                      | 92.6%             | 3.6              |
| NONRESIDENT | 40,020           | 32,475                      | 17,244  | 14,018 | 1,853 | 33,115 | 102,561                     | 102.0%            | 3.1              |

TABLE II  
**ANTELOPE**  
 TEN-YEAR COMPARISON OF HARVEST BY TOTAL HUNTERS  
**1998–2007**

| YEAR    | 1998   | 1999   | 2000   | 2001   | 2002   | 2003   | 2004   | 2005   | 2006   | 2007   |
|---------|--------|--------|--------|--------|--------|--------|--------|--------|--------|--------|
| HARVEST | 28,138 | 30,694 | 33,977 | 26,864 | 30,260 | 34,393 | 36,383 | 39,526 | 45,615 | 51,883 |

**ANTELOPE**  
**HARVEST BY HARVEST TOOL**  
**2007**

|                  |                   |                        |
|------------------|-------------------|------------------------|
| ARCHERY<br>4.81% | FIREARM<br>94.44% | MUZZLE LOADER<br>0.75% |
|------------------|-------------------|------------------------|

TABLE I-A  
**ANTELOPE**  
**HARVEST, HUNTING PRESSURE, HUNTER SUCCESS**  
 BY HUNT AREA  
**2007**

| AREA<br>(cross hunt areas) | TYPE               | ACTIVE<br>LICS/HTRS | HARVEST |     |      |       | HUNTER<br>SUCCESS | DAYS/<br>HARVEST | HUNTER<br>DAYS | LICENSES<br>SOLD<br>(cross hunt<br>incl) |
|----------------------------|--------------------|---------------------|---------|-----|------|-------|-------------------|------------------|----------------|------------------------------------------|
|                            |                    |                     | BUCK    | DOE | FAWN | TOTAL |                   |                  |                |                                          |
| 1 Crook                    | Limited 1<br>D/F 6 | 258                 | 207     | 9   | 0    | 216   | 83.7%             | 3.5              | 750            | 289                                      |
|                            |                    | 113                 | 0       | 65  | 9    | 74    | 65.5%             | 4.3              | 317            | 119                                      |
|                            | Pooled Total       | 328                 | 207     | 74  | 9    | 290   | 88.4%             | 3.7              | 1067           |                                          |
|                            | Pooled Resident    | 39                  | 12      | 8   | 0    | 20    | 51.3%             | 6.7              | 133            |                                          |
|                            | Pooled Nonresident | 289                 | 195     | 66  | 9    | 270   | 93.4%             | 3.5              | 934            |                                          |
| 2 Bearlodge                | Limited 1<br>D/F 6 | 337                 | 282     | 9   | 5    | 296   | 87.8%             | 3.9              | 1147           | 351                                      |
|                            |                    | 214                 | 0       | 137 | 28   | 165   | 77.1%             | 4.2              | 698            | 239                                      |
|                            | Pooled Total       | 488                 | 282     | 146 | 33   | 461   | 94.5%             | 4.0              | 1845           |                                          |
|                            | Pooled Resident    | 83                  | 54      | 20  | 4    | 78    | 94.0%             | 7.3              | 570            |                                          |
|                            | Pooled Nonresident | 405                 | 228     | 126 | 29   | 383   | 94.6%             | 3.3              | 1275           |                                          |
| 3 Keyhole                  | Limited 1<br>D/F 6 | 215                 | 196     | 11  | 0    | 207   | 96.3%             | 2.8              | 589            | 237                                      |
|                            |                    | 152                 | 0       | 131 | 12   | 143   | 94.1%             | 3.3              | 472            | 167                                      |
|                            | Pooled Total       | 295                 | 196     | 142 | 12   | 350   | 118.6%            | 3.0              | 1061           |                                          |
|                            | Pooled Resident    | 86                  | 43      | 46  | 4    | 93    | 108.1%            | 4.6              | 425            |                                          |
|                            | Pooled Nonresident | 209                 | 153     | 96  | 8    | 257   | 123.0%            | 2.5              | 636            |                                          |
| 4 Arch Creek               | Limited 1<br>D/F 6 | 221                 | 201     | 4   | 0    | 205   | 92.8%             | 2.2              | 459            | 229                                      |
|                            |                    | 124                 | 0       | 84  | 11   | 95    | 76.6%             | 3.3              | 315            | 135                                      |
|                            | Pooled Total       | 273                 | 201     | 88  | 11   | 300   | 109.9%            | 2.6              | 774            |                                          |
|                            | Pooled Resident    | 70                  | 48      | 22  | 3    | 73    | 104.3%            | 2.0              | 146            |                                          |
|                            | Pooled Nonresident | 203                 | 153     | 66  | 8    | 227   | 111.8%            | 2.8              | 628            |                                          |
| 5 Inyan Kara               | Limited 1<br>D/F 6 | 270                 | 238     | 0   | 0    | 238   | 88.1%             | 3.6              | 854            | 302                                      |
|                            |                    | 201                 | 0       | 134 | 26   | 160   | 79.6%             | 4.4              | 698            | 213                                      |
|                            | Pooled Total       | 418                 | 238     | 134 | 26   | 398   | 95.2%             | 3.9              | 1552           |                                          |
|                            | Pooled Resident    | 171                 | 111     | 20  | 0    | 131   | 76.6%             | 6.5              | 846            |                                          |
|                            | Pooled Nonresident | 247                 | 127     | 114 | 26   | 267   | 108.1%            | 2.6              | 706            |                                          |
| 6 South Newcastle          | Limited 1<br>D/F 6 | 326                 | 295     | 5   | 0    | 300   | 92.0%             | 2.6              | 784            | 339                                      |
|                            |                    | 126                 | 0       | 106 | 7    | 113   | 89.7%             | 2.2              | 245            | 134                                      |
|                            | Pooled Total       | 412                 | 295     | 111 | 7    | 413   | 100.2%            | 2.5              | 1029           |                                          |
|                            | Pooled Resident    | 79                  | 37      | 35  | 0    | 72    | 91.1%             | 2.3              | 167            |                                          |
|                            | Pooled Nonresident | 333                 | 258     | 76  | 7    | 341   | 102.4%            | 2.5              | 862            |                                          |
| 7 South Upton              | Limited 1<br>D/F 6 | 859                 | 785     | 0   | 0    | 785   | 91.4%             | 3.1              | 2417           | 859                                      |
|                            |                    | 513                 | 0       | 416 | 28   | 444   | 86.5%             | 3.1              | 1370           | 559                                      |
|                            | Pooled Total       | 1228                | 785     | 416 | 28   | 1229  | 100.1%            | 3.1              | 3787           |                                          |
|                            | Pooled Resident    | 263                 | 166     | 64  | 0    | 230   | 87.5%             | 2.9              | 664            |                                          |
|                            | Pooled Nonresident | 965                 | 619     | 352 | 28   | 999   | 103.5%            | 3.1              | 3123           |                                          |
| 8 Niobrara                 | Limited 1<br>D/F 6 | 279                 | 269     | 0   | 0    | 269   | 96.4%             | 3.3              | 877            | 301                                      |
|                            |                    | 47                  | 0       | 34  | 9    | 43    | 91.5%             | 3.8              | 163            | 50                                       |
|                            | Pooled Total       | 308                 | 269     | 34  | 9    | 312   | 101.3%            | 3.3              | 1040           |                                          |
|                            | Pooled Resident    | 19                  | 13      | 6   | 0    | 19    | 100.0%            | 2.7              | 51             |                                          |
|                            | Pooled Nonresident | 289                 | 256     | 28  | 9    | 293   | 101.4%            | 3.4              | 989            |                                          |
| 9 Lance Creek              | Limited 1<br>D/F 6 | 552                 | 468     | 32  | 0    | 500   | 90.6%             | 3.1              | 1566           | 552                                      |
|                            |                    | 400                 | 0       | 315 | 26   | 341   | 85.3%             | 3.6              | 1242           | 400                                      |
|                            | Pooled Total       | 857                 | 468     | 347 | 26   | 841   | 98.1%             | 3.3              | 2808           |                                          |
|                            | Pooled Resident    | 104                 | 57      | 38  | 0    | 95    | 91.3%             | 2.6              | 245            |                                          |
|                            | Pooled Nonresident | 753                 | 411     | 309 | 26   | 746   | 99.1%             | 3.4              | 2563           |                                          |

TABLE I-A (Continued)  
**ANTELOPE** HUNT AREA REPORT

| AREA<br>(cross hunt areas) | TYPE               | ACTIVE<br>LICS/HTRS | HARVEST |     |      |       | HUNTER<br>SUCCESS | DAYS/<br>HARVEST | HUNTER<br>DAYS | LICENSES<br>SOLD<br>(cross hunt<br>incl) |
|----------------------------|--------------------|---------------------|---------|-----|------|-------|-------------------|------------------|----------------|------------------------------------------|
|                            |                    |                     | BUCK    | DOE | FAWN | TOTAL |                   |                  |                |                                          |
| 10 Lake De Smet            | Limited 1<br>D/F 6 | 161                 | 136     | 0   | 0    | 136   | 84.5%             | 3.8              | 520            | 185                                      |
|                            |                    | 152                 | 0       | 130 | 10   | 140   | 92.1%             | 4.0              | 562            | 179                                      |
|                            | Pooled Total       | 219                 | 136     | 130 | 10   | 276   | 126.0%            | 3.9              | 1082           |                                          |
|                            | Pooled Resident    | 66                  | 40      | 38  | 0    | 78    | 118.2%            | 6.6              | 511            |                                          |
|                            | Pooled Nonresident | 153                 | 96      | 92  | 10   | 198   | 129.4%            | 2.9              | 571            |                                          |
| 11 Rawhide Butte           | Limited 1<br>D/F 6 | 235                 | 214     | 9   | 0    | 223   | 94.9%             | 3.8              | 854            | 252                                      |
|                            |                    | 262                 | 0       | 208 | 5    | 213   | 81.3%             | 4.6              | 970            | 300                                      |
|                            | Pooled Total       | 443                 | 214     | 217 | 5    | 436   | 98.4%             | 4.2              | 1824           |                                          |
|                            | Pooled Resident    | 129                 | 81      | 63  | 5    | 149   | 115.5%            | 5.6              | 827            |                                          |
|                            | Pooled Nonresident | 314                 | 133     | 154 | 0    | 287   | 91.4%             | 3.5              | 997            |                                          |
| 12 Meadowdale              | Limited 1<br>D/F 6 | 188                 | 180     | 0   | 0    | 180   | 95.7%             | 2.5              | 453            | 201                                      |
|                            |                    | 142                 | 0       | 121 | 13   | 134   | 94.4%             | 3.0              | 396            | 153                                      |
|                            | Pooled Total       | 280                 | 180     | 121 | 13   | 314   | 112.1%            | 2.7              | 849            |                                          |
|                            | Pooled Resident    | 42                  | 27      | 10  | 0    | 37    | 88.1%             | 3.9              | 143            |                                          |
|                            | Pooled Nonresident | 238                 | 153     | 111 | 13   | 277   | 116.4%            | 2.5              | 706            |                                          |
| 15 Clearmont               | Limited 1<br>D/F 6 | 523                 | 409     | 10  | 0    | 419   | 80.1%             | 5.0              | 2083           | 589                                      |
|                            |                    | 365                 | 0       | 225 | 35   | 260   | 71.2%             | 4.8              | 1241           | 423                                      |
|                            | Pooled Total       | 786                 | 409     | 235 | 35   | 679   | 86.4%             | 4.9              | 3324           |                                          |
|                            | Pooled Resident    | 217                 | 144     | 39  | 15   | 198   | 91.2%             | 5.4              | 1062           |                                          |
|                            | Pooled Nonresident | 569                 | 265     | 196 | 20   | 481   | 84.5%             | 4.7              | 2262           |                                          |
| 16 Ucross                  | Limited 1<br>D/F 6 | 372                 | 324     | 0   | 0    | 324   | 87.1%             | 2.9              | 933            | 382                                      |
|                            |                    | 119                 | 0       | 95  | 6    | 101   | 84.9%             | 3.4              | 341            | 128                                      |
|                            | Pooled Total       | 419                 | 324     | 95  | 6    | 425   | 101.4%            | 3.0              | 1274           |                                          |
|                            | Pooled Resident    | 96                  | 53      | 32  | 0    | 85    | 88.5%             | 2.3              | 197            |                                          |
|                            | Pooled Nonresident | 323                 | 271     | 63  | 6    | 340   | 105.3%            | 3.2              | 1077           |                                          |
| 17 Gillette<br>(18, 19)    | Limited 1<br>D/F 6 | 976                 | 948     | 0   | 0    | 948   | 97.1%             | 3.2              | 3071           | 1049                                     |
|                            |                    | 585                 | 0       | 533 | 0    | 533   | 91.1%             | 2.9              | 1556           | 902                                      |
|                            | Pooled Total       | 1410                | 948     | 533 | 0    | 1481  | 105.0%            | 3.1              | 4627           |                                          |
|                            | Pooled Resident    | 456                 | 279     | 190 | 0    | 469   | 102.9%            | 3.1              | 1447           |                                          |
|                            | Pooled Nonresident | 954                 | 669     | 343 | 0    | 1012  | 106.1%            | 3.1              | 3180           |                                          |
| 18 Rockypoint<br>(17, 19)  | Limited 1<br>D/F 6 | 316                 | 240     | 8   | 0    | 248   | 78.5%             | 3.3              | 806            | 330                                      |
|                            |                    | 82                  | 0       | 71  | 0    | 71    | 86.6%             | 2.5              | 175            | 902                                      |
|                            | Pooled Total       | 398                 | 240     | 79  | 0    | 319   | 80.2%             | 3.1              | 981            |                                          |
|                            | Pooled Resident    | 80                  | 28      | 14  | 0    | 42    | 52.5%             | 4.3              | 179            |                                          |
|                            | Pooled Nonresident | 318                 | 212     | 65  | 0    | 277   | 87.1%             | 2.9              | 802            |                                          |
| 19 Rozet<br>(17, 18)       | Limited 1<br>D/F 6 | 365                 | 326     | 6   | 0    | 332   | 91.0%             | 3.0              | 1009           | 391                                      |
|                            |                    | 178                 | 0       | 156 | 11   | 167   | 93.8%             | 2.0              | 331            | 902                                      |
|                            | Pooled Total       | 512                 | 326     | 162 | 11   | 499   | 97.5%             | 2.7              | 1340           |                                          |
|                            | Pooled Resident    | 137                 | 96      | 41  | 0    | 137   | 100.0%            | 2.5              | 336            |                                          |
|                            | Pooled Nonresident | 375                 | 230     | 121 | 11   | 362   | 96.5%             | 2.8              | 1004           |                                          |
| 20 Upper Powder River      | Limited 1<br>D/F 6 | 491                 | 375     | 8   | 8    | 391   | 79.6%             | 3.4              | 1334           | 538                                      |
|                            |                    | 347                 | 0       | 242 | 33   | 275   | 79.3%             | 4.2              | 1152           | 380                                      |
|                            | Pooled Total       | 758                 | 375     | 250 | 41   | 666   | 87.9%             | 3.7              | 2486           |                                          |
|                            | Pooled Resident    | 115                 | 62      | 19  | 11   | 92    | 80.0%             | 3.9              | 363            |                                          |
|                            | Pooled Nonresident | 643                 | 313     | 231 | 30   | 574   | 89.3%             | 3.7              | 2123           |                                          |

TABLE I-A (Continued)

**ANTELOPE HUNT AREA REPORT**

| AREA<br>(cross hunt areas)                          | TYPE      | ACTIVE<br>LICS/HTRS | HARVEST |     |      |       | HUNTER<br>SUCCESS | DAYS/<br>HARVEST | HUNTER<br>DAYS | LICENSES<br>SOLD<br>(cross hunt<br>incl) |
|-----------------------------------------------------|-----------|---------------------|---------|-----|------|-------|-------------------|------------------|----------------|------------------------------------------|
|                                                     |           |                     | BUCK    | DOE | FAWN | TOTAL |                   |                  |                |                                          |
| 21 Middle Fork                                      | Limited 1 | 438                 | 363     | 32  | 6    | 401   | 91.6%             | 2.7              | 1069           | 457                                      |
|                                                     | D/F 6     | 330                 | 0       | 231 | 29   | 260   | 78.8%             | 3.4              | 878            | 361                                      |
| Pooled Total                                        |           | 725                 | 363     | 263 | 35   | 661   | 91.2%             | 2.9              | 1947           |                                          |
| Pooled Resident                                     |           | 66                  | 56      | 5   | 5    | 66    | 100.0%            | 1.8              | 118            |                                          |
| Pooled Nonresident                                  |           | 659                 | 307     | 258 | 30   | 595   | 90.3%             | 3.1              | 1829           |                                          |
| 22 Crazy Woman                                      | Limited 1 | 477                 | 462     | 0   | 0    | 462   | 96.9%             | 2.2              | 1025           | 528                                      |
|                                                     | D/F 6     | 356                 | 0       | 299 | 26   | 325   | 91.3%             | 2.4              | 780            | 371                                      |
| Pooled Total                                        |           | 737                 | 462     | 299 | 26   | 787   | 106.8%            | 2.3              | 1805           |                                          |
| Pooled Resident                                     |           | 113                 | 92      | 38  | 4    | 134   | 118.6%            | 1.6              | 220            |                                          |
| Pooled Nonresident                                  |           | 624                 | 370     | 261 | 22   | 653   | 104.6%            | 2.4              | 1585           |                                          |
| 23 Pumpkin Buttes                                   | Limited 1 | 1606                | 1452    | 0   | 0    | 1452  | 90.4%             | 2.9              | 4159           | 1648                                     |
|                                                     | D/F 6     | 965                 | 0       | 870 | 52   | 922   | 95.5%             | 3.1              | 2836           | 993                                      |
| Pooled Total                                        |           | 2424                | 1452    | 870 | 52   | 2374  | 97.9%             | 2.9              | 6995           |                                          |
| Pooled Resident                                     |           | 378                 | 255     | 119 | 24   | 398   | 105.3%            | 2.6              | 1022           |                                          |
| Pooled Nonresident                                  |           | 2046                | 1197    | 751 | 28   | 1976  | 96.6%             | 3.0              | 5973           |                                          |
| 24 Thunder Basin                                    | Limited 1 | 624                 | 565     | 10  | 0    | 575   | 92.1%             | 3.3              | 1900           | 707                                      |
|                                                     | D/F 6     | 489                 | 0       | 472 | 9    | 481   | 98.4%             | 2.2              | 1064           | 581                                      |
| Pooled Total                                        |           | 1027                | 565     | 482 | 9    | 1056  | 102.8%            | 2.8              | 2964           |                                          |
| Pooled Resident                                     |           | 245                 | 150     | 79  | 0    | 229   | 93.5%             | 4.7              | 1067           |                                          |
| Pooled Nonresident                                  |           | 782                 | 415     | 403 | 9    | 827   | 105.8%            | 2.3              | 1897           |                                          |
| 25 Ormsby                                           | Limited 1 | 543                 | 444     | 34  | 0    | 478   | 88.0%             | 3.5              | 1651           | 581                                      |
|                                                     | D/F 6     | 231                 | 0       | 119 | 44   | 163   | 70.6%             | 4.6              | 757            | 256                                      |
| Pooled Total                                        |           | 693                 | 444     | 153 | 44   | 641   | 92.5%             | 3.8              | 2408           |                                          |
| Pooled Resident                                     |           | 266                 | 146     | 76  | 19   | 241   | 90.6%             | 4.7              | 1140           |                                          |
| Pooled Nonresident                                  |           | 427                 | 298     | 77  | 25   | 400   | 93.7%             | 3.2              | 1268           |                                          |
| 26 Bear Creek<br>(also valid 28)<br>(also valid 28) | Limited 1 | 845                 | 820     | 12  | 0    | 832   | 98.5%             | 2.4              | 1989           | 926                                      |
|                                                     | D/F 6     | 436                 | 0       | 381 | 35   | 416   | 95.4%             | 2.9              | 1202           | 481                                      |
| Pooled Total                                        |           | 1167                | 820     | 393 | 35   | 1248  | 106.9%            | 2.6              | 3191           |                                          |
| Pooled Resident                                     |           | 106                 | 93      | 12  | 0    | 105   | 99.1%             | 2.6              | 274            |                                          |
| Pooled Nonresident                                  |           | 1061                | 727     | 381 | 35   | 1143  | 107.7%            | 2.6              | 2917           |                                          |
| 27 Bill                                             | Limited 1 | 422                 | 357     | 0   | 0    | 357   | 84.6%             | 3.1              | 1122           | 453                                      |
|                                                     | D/F 6     | 216                 | 0       | 174 | 29   | 203   | 94.0%             | 2.5              | 504            | 256                                      |
| Pooled Total                                        |           | 600                 | 357     | 174 | 29   | 560   | 93.3%             | 2.9              | 1626           |                                          |
| Pooled Resident                                     |           | 327                 | 242     | 24  | 5    | 271   | 82.9%             | 3.1              | 840            |                                          |
| Pooled Nonresident                                  |           | 273                 | 115     | 150 | 24   | 289   | 105.9%            | 2.7              | 786            |                                          |
| 28 Sage Creek<br>(also valid 26)<br>(also valid 26) | Limited 1 | 237                 | 222     | 0   | 0    | 222   | 93.7%             | 2.6              | 583            | 241                                      |
|                                                     | D/F 6     | 180                 | 0       | 162 | 5    | 167   | 92.8%             | 3.0              | 509            | 205                                      |
| Pooled Total                                        |           | 335                 | 222     | 162 | 5    | 389   | 116.1%            | 2.8              | 1092           |                                          |
| Pooled Resident                                     |           | 33                  | 26      | 0   | 0    | 26    | 78.8%             | 2.8              | 74             |                                          |
| Pooled Nonresident                                  |           | 302                 | 196     | 162 | 5    | 363   | 120.2%            | 2.8              | 1018           |                                          |
| 29 Shawnee                                          | Limited 1 | 1174                | 1078    | 17  | 0    | 1095  | 93.3%             | 3.1              | 3393           | 1204                                     |
|                                                     | D/F 6     | 761                 | 0       | 614 | 86   | 700   | 92.0%             | 4.1              | 2889           | 786                                      |
|                                                     | D/F 7     | 77                  | 0       | 64  | 5    | 69    | 89.6%             | 3.7              | 252            | 77                                       |
| Pooled Total                                        |           | 1916                | 1078    | 695 | 91   | 1864  | 97.3%             | 3.5              | 6534           |                                          |
| Pooled Resident                                     |           | 255                 | 175     | 80  | 0    | 255   | 100.0%            | 5.2              | 1325           |                                          |
| Pooled Nonresident                                  |           | 1661                | 903     | 615 | 91   | 1609  | 96.9%             | 3.2              | 5209           |                                          |

TABLE I-A (Continued)  
**ANTELOPE HUNT AREA REPORT**

| AREA<br>(cross hunt areas) | TYPE               | ACTIVE<br>LICS/HTRS | HARVEST |     |      |       | HUNTER<br>SUCCESS | DAYS/<br>HARVEST | HUNTER<br>DAYS | LICENSES<br>SOLD<br>(cross hunt<br>incl) |
|----------------------------|--------------------|---------------------|---------|-----|------|-------|-------------------|------------------|----------------|------------------------------------------|
|                            |                    |                     | BUCK    | DOE | FAWN | TOTAL |                   |                  |                |                                          |
| 30 La Prele                |                    |                     |         |     |      |       |                   |                  |                |                                          |
|                            | Limited 1          | 567                 | 455     | 9   | 0    | 464   | 81.8%             | 3.3              | 1531           | 603                                      |
|                            | D/F 6              | 559                 | 0       | 406 | 57   | 463   | 82.8%             | 3.6              | 1659           | 596                                      |
|                            | Pooled Total       | 1017                | 455     | 415 | 57   | 927   | 91.2%             | 3.4              | 3190           |                                          |
|                            | Pooled Resident    | 240                 | 126     | 61  | 20   | 207   | 86.3%             | 3.8              | 794            |                                          |
|                            | Pooled Nonresident | 777                 | 329     | 354 | 37   | 720   | 92.7%             | 3.3              | 2396           |                                          |
| 31 Hat Six                 |                    |                     |         |     |      |       |                   |                  |                |                                          |
|                            | Limited 1          | 364                 | 336     | 0   | 6    | 342   | 94.0%             | 3.0              | 1043           | 402                                      |
|                            | D/F 6              | 387                 | 0       | 265 | 89   | 354   | 91.5%             | 3.8              | 1357           | 448                                      |
|                            | Pooled Total       | 607                 | 336     | 265 | 95   | 696   | 114.7%            | 3.4              | 2400           |                                          |
|                            | Pooled Resident    | 137                 | 83      | 54  | 17   | 154   | 112.4%            | 3.8              | 588            |                                          |
|                            | Pooled Nonresident | 470                 | 253     | 211 | 78   | 542   | 115.3%            | 3.3              | 1812           |                                          |
| 32 Bates Creek             |                    |                     |         |     |      |       |                   |                  |                |                                          |
|                            | Limited 1          | 405                 | 303     | 15  | 0    | 318   | 78.5%             | 3.1              | 980            | 454                                      |
|                            | Limited 2          | 235                 | 191     | 21  | 0    | 212   | 90.2%             | 3.8              | 815            | 252                                      |
|                            | D/F 6              | 592                 | 0       | 420 | 116  | 536   | 90.5%             | 3.4              | 1809           | 650                                      |
|                            | Pooled Total       | 1160                | 494     | 456 | 116  | 1066  | 91.9%             | 3.4              | 3604           |                                          |
| 34 Rock Eagle              |                    |                     |         |     |      |       |                   |                  |                |                                          |
|                            | Limited 1          | 219                 | 149     | 19  | 0    | 168   | 76.7%             | 4.4              | 737            | 226                                      |
|                            | D/F 6              | 157                 | 0       | 115 | 12   | 127   | 80.9%             | 3.8              | 477            | 200                                      |
|                            | Pooled Total       | 348                 | 149     | 134 | 12   | 295   | 84.8%             | 4.1              | 1214           |                                          |
| 35 Horse Creek             |                    |                     |         |     |      |       |                   |                  |                |                                          |
|                            | Limited 1          | 279                 | 199     | 13  | 6    | 218   | 78.1%             | 3.4              | 747            | 301                                      |
|                            | D/F 6              | 179                 | 0       | 105 | 32   | 137   | 76.5%             | 3.9              | 537            | 207                                      |
|                            | Pooled Total       | 401                 | 199     | 118 | 38   | 355   | 88.5%             | 3.6              | 1284           |                                          |
| 36 Burns                   |                    |                     |         |     |      |       |                   |                  |                |                                          |
|                            | Limited 1          | 186                 | 116     | 16  | 0    | 132   | 71.0%             | 4.8              | 629            | 201                                      |
|                            | D/F 6              | 167                 | 0       | 91  | 31   | 122   | 73.1%             | 4.2              | 507            | 199                                      |
|                            | Pooled Total       | 317                 | 116     | 107 | 31   | 254   | 80.1%             | 4.5              | 1136           |                                          |
| 37 Harriman                |                    |                     |         |     |      |       |                   |                  |                |                                          |
|                            | Limited 1          | 197                 | 89      | 58  | 16   | 163   | 82.7%             | 4.3              | 707            |                                          |
|                            | Pooled Resident    | 120                 | 27      | 49  | 15   | 91    | 75.8%             | 4.7              | 429            |                                          |
|                            | Pooled Nonresident |                     |         |     |      |       |                   |                  |                |                                          |
| 38 Little Bear Creek       |                    |                     |         |     |      |       |                   |                  |                |                                          |
|                            | Limited 1          | 261                 | 210     | 10  | 5    | 225   | 86.2%             | 2.5              | 569            | 276                                      |
|                            | D/F 6              | 65                  | 0       | 45  | 3    | 48    | 73.8%             | 4.1              | 195            | 75                                       |
|                            | Pooled Total       | 278                 | 210     | 55  | 8    | 273   | 98.2%             | 2.8              | 764            |                                          |
|                            | Pooled Resident    | 170                 | 117     | 20  | 6    | 143   | 84.1%             | 2.9              | 418            |                                          |
| 39 Bluegrass               |                    |                     |         |     |      |       |                   |                  |                |                                          |
|                            | Limited 1          | 108                 | 93      | 35  | 2    | 130   | 120.4%            | 2.7              | 346            |                                          |
|                            | Pooled Nonresident |                     |         |     |      |       |                   |                  |                |                                          |
|                            | Limited 1          | 491                 | 371     | 11  | 10   | 392   | 79.8%             | 4.2              | 1641           | 551                                      |
|                            | D/F 6              | 410                 | 0       | 335 | 0    | 335   | 81.7%             | 3.7              | 1236           | 446                                      |
| 39 Bluegrass               |                    |                     |         |     |      |       |                   |                  |                |                                          |
|                            | Limited 1          | 287                 | 249     | 6   | 0    | 255   | 88.9%             | 3.1              | 780            | 300                                      |
|                            | D/F 6              | 87                  | 0       | 60  | 2    | 62    | 71.3%             | 4.2              | 263            | 100                                      |
|                            | Pooled Total       | 349                 | 249     | 66  | 2    | 317   | 90.8%             | 3.3              | 1043           |                                          |
| 39 Bluegrass               |                    |                     |         |     |      |       |                   |                  |                |                                          |
|                            | Limited 1          | 141                 | 98      | 22  | 0    | 120   | 85.1%             | 3.7              | 442            |                                          |
|                            | Pooled Resident    | 208                 | 151     | 44  | 2    | 197   | 94.7%             | 3.1              | 601            |                                          |
|                            | Pooled Nonresident |                     |         |     |      |       |                   |                  |                |                                          |

TABLE I-A (Continued)

**ANTELOPE HUNT AREA REPORT**

| AREA<br>(cross hunt areas) | TYPE               | ACTIVE<br>LICS/HTRS | HARVEST |     |      |       | HUNTER<br>SUCCESS | DAYS/<br>HARVEST | HUNTER<br>DAYS | LICENSES<br>SOLD<br>(cross hunt<br>incl) |
|----------------------------|--------------------|---------------------|---------|-----|------|-------|-------------------|------------------|----------------|------------------------------------------|
|                            |                    |                     | BUCK    | DOE | FAWN | TOTAL |                   |                  |                |                                          |
| 40 East Laramie            | Limited 1          | 194                 | 168     | 6   | 0    | 174   | 89.7%             | 2.8              | 483            | 207                                      |
|                            | D/F 6              | 196                 | 0       | 144 | 33   | 177   | 90.3%             | 2.1              | 373            | 203                                      |
|                            | Pooled Total       | 300                 | 168     | 150 | 33   | 351   | 117.0%            | 2.4              | 856            |                                          |
|                            | Pooled Resident    | 87                  | 60      | 25  | 0    | 85    | 97.7%             | 3.1              | 261            |                                          |
|                            | Pooled Nonresident | 213                 | 108     | 125 | 33   | 266   | 124.9%            | 2.2              | 595            |                                          |
| 41 Laramie Peak            | Limited 1          | 50                  | 44      | 0   | 0    | 44    | 88.0%             | 2.3              | 101            | 58                                       |
|                            | D/F 6              | 46                  | 0       | 30  | 2    | 32    | 69.6%             | 3.7              | 117            | 50                                       |
|                            | Pooled Total       | 75                  | 44      | 30  | 2    | 76    | 101.3%            | 2.9              | 218            |                                          |
|                            | Pooled Resident    | 28                  | 23      | 0   | 0    | 23    | 82.1%             | 2.5              | 58             |                                          |
|                            | Pooled Nonresident | 47                  | 21      | 30  | 2    | 53    | 112.8%            | 3.0              | 160            |                                          |
| 42 Laramie Plains          | Limited 1          | 605                 | 529     | 0   | 0    | 529   | 87.4%             | 3.3              | 1747           | 650                                      |
|                            | D/F 6              | 262                 | 0       | 169 | 38   | 207   | 79.0%             | 4.0              | 818            | 300                                      |
|                            | D/F 7              | 175                 | 0       | 126 | 14   | 140   | 80.0%             | 4.8              | 674            | 200                                      |
|                            | Pooled Total       | 907                 | 529     | 295 | 52   | 876   | 96.6%             | 3.7              | 3239           |                                          |
|                            | Pooled Resident    | 141                 | 100     | 25  | 0    | 125   | 88.7%             | 3.2              | 398            |                                          |
|                            | Pooled Nonresident | 766                 | 429     | 270 | 52   | 751   | 98.0%             | 3.8              | 2841           |                                          |
| 43 Cooper Lake             | Limited 1          | 382                 | 325     | 0   | 0    | 325   | 85.1%             | 3.5              | 1124           | 402                                      |
|                            | D/F 6              | 338                 | 0       | 206 | 48   | 254   | 75.1%             | 3.4              | 875            | 400                                      |
|                            | Pooled Total       | 672                 | 325     | 206 | 48   | 579   | 86.2%             | 3.5              | 1999           |                                          |
|                            | Pooled Resident    | 121                 | 54      | 18  | 5    | 77    | 63.6%             | 5.5              | 425            |                                          |
|                            | Pooled Nonresident | 551                 | 271     | 188 | 43   | 502   | 91.1%             | 3.1              | 1574           |                                          |
| 44 South Laramie           | Limited 1          | 244                 | 205     | 12  | 0    | 217   | 88.9%             | 3.3              | 719            | 258                                      |
|                            | D/F 6              | 262                 | 0       | 147 | 37   | 184   | 70.2%             | 5.6              | 1034           | 298                                      |
|                            | Pooled Total       | 420                 | 205     | 159 | 37   | 401   | 95.5%             | 4.4              | 1753           |                                          |
|                            | Pooled Resident    | 125                 | 73      | 23  | 11   | 107   | 85.6%             | 5.2              | 558            |                                          |
|                            | Pooled Nonresident | 295                 | 132     | 136 | 26   | 294   | 99.7%             | 4.1              | 1195           |                                          |
| 45 West Laramie            | Limited 1          | 567                 | 467     | 0   | 10   | 477   | 84.1%             | 3.1              | 1494           | 657                                      |
|                            | D/F 6              | 510                 | 0       | 362 | 25   | 387   | 75.9%             | 4.7              | 1833           | 600                                      |
|                            | Pooled Total       | 999                 | 467     | 362 | 35   | 864   | 86.5%             | 3.9              | 3327           |                                          |
|                            | Pooled Resident    | 327                 | 150     | 74  | 0    | 224   | 68.5%             | 5.1              | 1135           |                                          |
|                            | Pooled Nonresident | 672                 | 317     | 288 | 35   | 640   | 95.2%             | 3.4              | 2192           |                                          |
| 46 Kyle                    | Limited 1          | 455                 | 363     | 7   | 0    | 370   | 81.3%             | 3.0              | 1118           | 504                                      |
|                            | D/F 6              | 269                 | 0       | 188 | 34   | 222   | 82.5%             | 2.9              | 633            | 311                                      |
|                            | D/F 7              | 172                 | 0       | 112 | 19   | 131   | 76.2%             | 3.8              | 500            | 200                                      |
|                            | Pooled Total       | 789                 | 363     | 307 | 53   | 723   | 91.6%             | 3.1              | 2251           |                                          |
|                            | Pooled Resident    | 219                 | 123     | 48  | 0    | 171   | 78.1%             | 3.4              | 577            |                                          |
|                            | Pooled Nonresident | 570                 | 240     | 259 | 53   | 552   | 96.8%             | 3.0              | 1674           |                                          |
| 47 Shirley Basin           | Limited 1          | 941                 | 714     | 15  | 15   | 744   | 79.1%             | 3.1              | 2282           | 1006                                     |
|                            | Limited 2          | 336                 | 310     | 9   | 0    | 319   | 94.9%             | 2.7              | 851            | 350                                      |
|                            | D/F 6              | 607                 | 0       | 449 | 82   | 531   | 87.5%             | 3.1              | 1670           | 706                                      |
|                            | D/F 7              | 359                 | 0       | 249 | 60   | 309   | 86.1%             | 3.2              | 997            | 400                                      |
|                            | Pooled Total       | 2144                | 1024    | 722 | 157  | 1903  | 88.8%             | 3.0              | 5800           |                                          |
|                            | Pooled Resident    | 980                 | 604     | 200 | 19   | 823   | 84.0%             | 3.2              | 2622           |                                          |
|                            | Pooled Nonresident | 1164                | 420     | 522 | 138  | 1080  | 92.8%             | 2.9              | 3178           |                                          |

TABLE I-A (Continued)

**ANTELOPE HUNT AREA REPORT**

| AREA<br>(cross hunt areas) | TYPE               | ACTIVE<br>LICS/HTRS | HARVEST |     |      |       | HUNTER<br>SUCCESS | DAYS/<br>HARVEST | HUNTER<br>DAYS | LICENSES<br>SOLD<br>(cross hunt<br>incl) |
|----------------------------|--------------------|---------------------|---------|-----|------|-------|-------------------|------------------|----------------|------------------------------------------|
|                            |                    |                     | BUCK    | DOE | FAWN | TOTAL |                   |                  |                |                                          |
| 48 Leo-Hanna               | Limited 1          | 307                 | 246     | 17  | 0    | 263   | 85.7%             | 2.6              | 685            | 356                                      |
|                            | Limited 2          | 141                 | 127     | 0   | 2    | 129   | 91.5%             | 2.9              | 376            | 156                                      |
|                            | D/F 6              | 273                 | 0       | 217 | 16   | 233   | 85.3%             | 3.2              | 746            | 375                                      |
|                            | D/F 7              | 399                 | 0       | 271 | 30   | 301   | 75.4%             | 3.4              | 1015           | 476                                      |
|                            | Pooled Total       | 997                 | 373     | 505 | 48   | 926   | 92.9%             | 3.0              | 2822           |                                          |
|                            | Pooled Resident    | 303                 | 209     | 50  | 0    | 259   | 85.5%             | 2.7              | 695            |                                          |
|                            | Pooled Nonresident | 694                 | 164     | 455 | 48   | 667   | 96.1%             | 3.2              | 2127           |                                          |
| 50 Elk Mountain            | Limited 1          | 470                 | 412     | 0   | 0    | 412   | 87.7%             | 3.6              | 1480           | 506                                      |
|                            | D/F 6              | 466                 | 0       | 363 | 41   | 404   | 86.7%             | 3.3              | 1342           | 500                                      |
|                            | Limited 8          | 48                  | 39      | 0   | 0    | 39    | 81.3%             | 3.7              | 144            | 51                                       |
|                            | Pooled Total       | 908                 | 451     | 363 | 41   | 855   | 94.2%             | 3.5              | 2966           |                                          |
|                            | Pooled Resident    | 162                 | 90      | 47  | 0    | 137   | 84.6%             | 4.0              | 551            |                                          |
|                            | Pooled Nonresident | 746                 | 361     | 316 | 41   | 718   | 96.2%             | 3.4              | 2415           |                                          |
| 51 Big Creek               | Limited 1          | 96                  | 77      | 4   | 0    | 81    | 84.4%             | 4.1              | 329            | 104                                      |
|                            | D/F 6              | 125                 | 0       | 101 | 8    | 109   | 87.2%             | 3.5              | 382            | 150                                      |
|                            | Pooled Total       | 185                 | 77      | 105 | 8    | 190   | 102.7%            | 3.7              | 711            |                                          |
|                            | Pooled Resident    | 99                  | 58      | 33  | 0    | 91    | 91.9%             | 4.2              | 378            |                                          |
|                            | Pooled Nonresident | 86                  | 19      | 72  | 8    | 99    | 115.1%            | 3.4              | 333            |                                          |
| 52 Spring Creek            | Limited 1          | 235                 | 206     | 0   | 0    | 206   | 87.7%             | 2.6              | 544            | 254                                      |
|                            | Limited 2          | 239                 | 203     | 0   | 0    | 203   | 84.9%             | 3.5              | 709            | 250                                      |
|                            | D/F 6              | 152                 | 0       | 131 | 14   | 145   | 95.4%             | 2.4              | 341            | 202                                      |
|                            | D/F 7              | 85                  | 0       | 60  | 14   | 74    | 87.1%             | 4.3              | 316            | 101                                      |
|                            | Pooled Total       | 636                 | 409     | 191 | 28   | 628   | 98.7%             | 3.0              | 1910           |                                          |
|                            | Pooled Resident    | 263                 | 209     | 36  | 0    | 245   | 93.2%             | 2.9              | 722            |                                          |
|                            | Pooled Nonresident | 373                 | 200     | 155 | 28   | 383   | 102.7%            | 3.1              | 1188           |                                          |
| 53 Baggs                   | Limited 1          | 531                 | 444     | 0   | 0    | 444   | 83.6%             | 4.0              | 1767           | 556                                      |
|                            | D/F 6              | 523                 | 0       | 376 | 58   | 434   | 83.0%             | 3.1              | 1328           | 751                                      |
|                            | D/F 7              | 20                  | 0       | 16  | 2    | 18    | 90.0%             | 5.7              | 102            | 25                                       |
|                            | Pooled Total       | 981                 | 444     | 392 | 60   | 896   | 91.3%             | 3.6              | 3197           |                                          |
|                            | Pooled Resident    | 487                 | 360     | 55  | 2    | 417   | 85.6%             | 4.0              | 1651           |                                          |
|                            | Pooled Nonresident | 494                 | 84      | 337 | 58   | 479   | 97.0%             | 3.2              | 1546           |                                          |
| 55 Red Rim                 | Limited 1          | 131                 | 106     | 0   | 0    | 106   | 80.9%             | 3.6              | 383            | 152                                      |
|                            | D/F 6              | 78                  | 0       | 71  | 2    | 73    | 93.6%             | 2.2              | 161            | 100                                      |
|                            | Pooled Total       | 181                 | 106     | 71  | 2    | 179   | 98.9%             | 3.0              | 544            |                                          |
|                            | Pooled Resident    | 116                 | 80      | 14  | 0    | 94    | 81.0%             | 4.1              | 384            |                                          |
|                            | Pooled Nonresident | 65                  | 26      | 57  | 2    | 85    | 130.8%            | 1.9              | 160            |                                          |
| 56 Iron Springs            | Limited 1          | 177                 | 164     | 0   | 0    | 164   | 92.7%             | 2.8              | 456            | 201                                      |
|                            | Pooled Total       | 177                 | 164     | 0   | 0    | 164   | 92.7%             | 2.8              | 456            |                                          |
|                            | Pooled Resident    | 25                  | 25      | 0   | 0    | 25    | 100.0%            | 1.4              | 35             |                                          |
|                            | Pooled Nonresident | 152                 | 139     | 0   | 0    | 139   | 91.4%             | 3.0              | 421            |                                          |
| 57 South Wamsutter         | Limited 1          | 283                 | 229     | 0   | 0    | 229   | 80.9%             | 3.6              | 833            | 302                                      |
|                            | D/F 6              | 28                  | 0       | 21  | 7    | 28    | 100.0%            | 4.7              | 132            | 28                                       |
|                            | Pooled Total       | 301                 | 229     | 21  | 7    | 257   | 85.4%             | 3.8              | 965            |                                          |
|                            | Pooled Resident    | 241                 | 175     | 13  | 7    | 195   | 80.9%             | 4.2              | 811            |                                          |
|                            | Pooled Nonresident | 60                  | 54      | 8   | 0    | 62    | 103.3%            | 2.5              | 154            |                                          |
| 58 Black Butte-Kenny Rim   | Limited 1          | 140                 | 118     | 0   | 0    | 118   | 84.3%             | 2.5              | 296            | 152                                      |
|                            | Pooled Total       | 140                 | 118     | 0   | 0    | 118   | 84.3%             | 2.5              | 296            |                                          |
|                            | Pooled Resident    | 110                 | 88      | 0   | 0    | 88    | 80.0%             | 2.7              | 234            |                                          |
|                            | Pooled Nonresident | 30                  | 30      | 0   | 0    | 30    | 100.0%            | 2.1              | 62             |                                          |

TABLE I-A (Continued)  
**ANTELOPE HUNT AREA REPORT**

| AREA<br>(cross hunt areas) | TYPE      | ACTIVE<br>LICS/HTRS | HARVEST |     |      |       | HUNTER<br>SUCCESS | DAYS/<br>HARVEST | HUNTER<br>DAYS | LICENSES<br>SOLD<br>(cross hunt<br>incl) |
|----------------------------|-----------|---------------------|---------|-----|------|-------|-------------------|------------------|----------------|------------------------------------------|
|                            |           |                     | BUCK    | DOE | FAWN | TOTAL |                   |                  |                |                                          |
| 59 Aspen Mountain          |           |                     |         |     |      |       |                   |                  |                |                                          |
|                            | Limited 1 | 173                 | 148     | 0   | 0    | 148   | 85.5%             | 3.0              | 451            | 177                                      |
|                            | D/F 6     | 114                 | 0       | 103 | 7    | 110   | 96.5%             | 1.5              | 170            | 128                                      |
| Pooled Total               |           | 255                 | 148     | 103 | 7    | 258   | 101.2%            | 2.4              | 621            |                                          |
| Pooled Resident            |           | 191                 | 116     | 61  | 3    | 180   | 94.2%             | 2.5              | 454            |                                          |
| Pooled Nonresident         |           | 64                  | 32      | 42  | 4    | 78    | 121.9%            | 2.1              | 167            |                                          |
| 60 Table Rock              |           |                     |         |     |      |       |                   |                  |                |                                          |
|                            | Limited 1 | 99                  | 89      | 0   | 0    | 89    | 89.9%             | 4.3              | 386            | 100                                      |
| Pooled Total               |           | 99                  | 89      | 0   | 0    | 89    | 89.9%             | 4.3              | 386            |                                          |
| Pooled Resident            |           | 80                  | 70      | 0   | 0    | 70    | 87.5%             | 4.4              | 307            |                                          |
| Pooled Nonresident         |           | 19                  | 19      | 0   | 0    | 19    | 100.0%            | 4.2              | 79             |                                          |
| 61 Chain Lakes             |           |                     |         |     |      |       |                   |                  |                |                                          |
|                            | Limited 1 | 135                 | 115     | 0   | 0    | 115   | 85.2%             | 3.0              | 344            | 154                                      |
| Pooled Total               |           | 135                 | 115     | 0   | 0    | 115   | 85.2%             | 3.0              | 344            |                                          |
| Pooled Resident            |           | 104                 | 84      | 0   | 0    | 84    | 80.8%             | 3.2              | 269            |                                          |
| Pooled Nonresident         |           | 31                  | 31      | 0   | 0    | 31    | 100.0%            | 2.4              | 75             |                                          |
| 62 South Ferris            |           |                     |         |     |      |       |                   |                  |                |                                          |
|                            | Limited 1 | 359                 | 305     | 0   | 0    | 305   | 85.0%             | 3.6              | 1088           | 407                                      |
| Pooled Total               |           | 359                 | 305     | 0   | 0    | 305   | 85.0%             | 3.6              | 1088           |                                          |
| Pooled Resident            |           | 274                 | 226     | 0   | 0    | 226   | 82.5%             | 3.8              | 850            |                                          |
| Pooled Nonresident         |           | 85                  | 79      | 0   | 0    | 79    | 92.9%             | 3.0              | 238            |                                          |
| 63 North Ferris            |           |                     |         |     |      |       |                   |                  |                |                                          |
|                            | Limited 1 | 385                 | 310     | 6   | 0    | 316   | 82.1%             | 2.6              | 808            | 404                                      |
|                            | D/F 6     | 120                 | 0       | 102 | 5    | 107   | 89.2%             | 3.0              | 324            | 150                                      |
| Pooled Total               |           | 471                 | 310     | 108 | 5    | 423   | 89.8%             | 2.7              | 1132           |                                          |
| Pooled Resident            |           | 329                 | 226     | 42  | 0    | 268   | 81.5%             | 2.4              | 646            |                                          |
| Pooled Nonresident         |           | 142                 | 84      | 66  | 5    | 155   | 109.2%            | 3.1              | 486            |                                          |
| 64 Bison Basin             |           |                     |         |     |      |       |                   |                  |                |                                          |
|                            | Limited 1 | 236                 | 196     | 0   | 0    | 196   | 83.1%             | 3.7              | 721            | 251                                      |
| Pooled Total               |           | 236                 | 196     | 0   | 0    | 196   | 83.1%             | 3.7              | 721            |                                          |
| Pooled Resident            |           | 185                 | 145     | 0   | 0    | 145   | 78.4%             | 4.2              | 607            |                                          |
| Pooled Nonresident         |           | 51                  | 51      | 0   | 0    | 51    | 100.0%            | 2.2              | 114            |                                          |
| 65 South Pass              |           |                     |         |     |      |       |                   |                  |                |                                          |
|                            | Limited 1 | 259                 | 238     | 0   | 0    | 238   | 91.9%             | 4.5              | 1076           | 273                                      |
|                            | D/F 6     | 222                 | 0       | 176 | 9    | 185   | 83.3%             | 4.0              | 744            | 252                                      |
| Pooled Total               |           | 440                 | 238     | 176 | 9    | 423   | 96.1%             | 4.3              | 1820           |                                          |
| Pooled Resident            |           | 288                 | 172     | 90  | 5    | 267   | 92.7%             | 4.2              | 1111           |                                          |
| Pooled Nonresident         |           | 152                 | 66      | 86  | 4    | 156   | 102.6%            | 4.5              | 709            |                                          |
| 66 Lander                  |           |                     |         |     |      |       |                   |                  |                |                                          |
|                            | Limited 1 | 81                  | 66      | 0   | 0    | 66    | 81.5%             | 4.6              | 302            | 83                                       |
|                            | D/F 6     | 61                  | 0       | 49  | 0    | 49    | 80.3%             | 5.6              | 272            | 74                                       |
| Pooled Total               |           | 118                 | 66      | 49  | 0    | 115   | 97.5%             | 5.0              | 574            |                                          |
| Pooled Resident            |           | 86                  | 49      | 39  | 0    | 88    | 102.3%            | 5.6              | 489            |                                          |
| Pooled Nonresident         |           | 32                  | 17      | 10  | 0    | 27    | 84.4%             | 3.1              | 85             |                                          |
| 67 Sand Draw               |           |                     |         |     |      |       |                   |                  |                |                                          |
|                            | Limited 1 | 208                 | 193     | 0   | 0    | 193   | 92.8%             | 2.3              | 450            | 222                                      |
|                            | D/F 6     | 98                  | 0       | 74  | 6    | 80    | 81.6%             | 3.1              | 245            | 125                                      |
| Pooled Total               |           | 272                 | 193     | 74  | 6    | 273   | 100.4%            | 2.5              | 695            |                                          |
| Pooled Resident            |           | 198                 | 145     | 44  | 3    | 192   | 97.0%             | 2.6              | 490            |                                          |
| Pooled Nonresident         |           | 74                  | 48      | 30  | 3    | 81    | 109.5%            | 2.5              | 205            |                                          |



TABLE I-A (Continued)

**ANTELOPE HUNT AREA REPORT**

| AREA<br>(cross hunt areas) | TYPE               | ACTIVE<br>LICS/HTRS | HARVEST |     |      |       | HUNTER<br>SUCCESS | DAYS/<br>HARVEST | HUNTER<br>DAYS | LICENSES<br>SOLD<br>(cross hunt<br>incl) |
|----------------------------|--------------------|---------------------|---------|-----|------|-------|-------------------|------------------|----------------|------------------------------------------|
|                            |                    |                     | BUCK    | DOE | FAWN | TOTAL |                   |                  |                |                                          |
| 68 Split Rock              | Limited 1<br>D/F 6 | 306                 | 256     | 0   | 0    | 256   | 83.7%             | 3.5              | 887            | 326                                      |
|                            |                    | 181                 | 0       | 148 | 16   | 164   | 90.6%             | 2.6              | 421            | 243                                      |
|                            | Pooled Total       | 438                 | 256     | 148 | 16   | 420   | 95.9%             | 3.1              | 1308           |                                          |
|                            | Pooled Resident    | 254                 | 187     | 33  | 0    | 220   | 86.6%             | 3.2              | 704            |                                          |
|                            | Pooled Nonresident | 184                 | 69      | 115 | 16   | 200   | 108.7%            | 3.0              | 604            |                                          |
| 69 South Rattlesnake       | Limited 1<br>D/F 6 | 89                  | 62      | 1   | 6    | 69    | 77.5%             | 3.4              | 234            | 101                                      |
|                            |                    | 56                  | 0       | 37  | 9    | 46    | 82.1%             | 2.7              | 123            | 56                                       |
|                            | Pooled Total       | 124                 | 62      | 38  | 15   | 115   | 92.7%             | 3.1              | 357            |                                          |
|                            | Pooled Resident    | 88                  | 50      | 17  | 12   | 79    | 89.8%             | 2.8              | 218            |                                          |
|                            | Pooled Nonresident | 36                  | 12      | 21  | 3    | 36    | 100.0%            | 3.9              | 139            |                                          |
| 70 Kendrick                | Limited 1<br>D/F 6 | 184                 | 174     | 0   | 0    | 174   | 94.6%             | 2.6              | 444            | 201                                      |
|                            |                    | 270                 | 0       | 183 | 50   | 233   | 86.3%             | 3.6              | 835            | 300                                      |
|                            | Pooled Total       | 360                 | 174     | 183 | 50   | 407   | 113.1%            | 3.1              | 1279           |                                          |
|                            | Pooled Resident    | 97                  | 54      | 40  | 10   | 104   | 107.2%            | 3.1              | 318            |                                          |
|                            | Pooled Nonresident | 263                 | 120     | 143 | 40   | 303   | 115.2%            | 3.2              | 961            |                                          |
| 71 East Poison Spider      | Limited 1<br>D/F 6 | 277                 | 267     | 0   | 0    | 267   | 96.4%             | 1.8              | 484            | 303                                      |
|                            |                    | 196                 | 0       | 157 | 31   | 188   | 95.9%             | 3.4              | 630            | 199                                      |
|                            | Pooled Total       | 449                 | 267     | 157 | 31   | 455   | 101.3%            | 2.4              | 1114           |                                          |
|                            | Pooled Resident    | 229                 | 156     | 52  | 15   | 223   | 97.4%             | 2.0              | 445            |                                          |
|                            | Pooled Nonresident | 220                 | 111     | 105 | 16   | 232   | 105.5%            | 2.9              | 669            |                                          |
| 72 West Poison Spider      | Limited 1<br>D/F 6 | 834                 | 766     | 0   | 0    | 766   | 91.8%             | 2.9              | 2234           | 906                                      |
|                            |                    | 404                 | 0       | 336 | 50   | 386   | 95.5%             | 2.6              | 985            | 452                                      |
|                            | Pooled Total       | 1121                | 766     | 336 | 50   | 1152  | 102.8%            | 2.8              | 3219           |                                          |
|                            | Pooled Resident    | 590                 | 422     | 129 | 28   | 579   | 98.1%             | 3.2              | 1873           |                                          |
|                            | Pooled Nonresident | 531                 | 344     | 207 | 22   | 573   | 107.9%            | 2.3              | 1346           |                                          |
| 73 North Natrona           | Limited 1          | 451                 | 403     | 28  | 0    | 431   | 95.6%             | 2.2              | 940            | 504                                      |
|                            | Limited 2          | 247                 | 212     | 0   | 0    | 212   | 85.8%             | 3.2              | 672            | 305                                      |
|                            | D/F 6              | 312                 | 0       | 244 | 29   | 273   | 87.5%             | 3.0              | 825            | 399                                      |
|                            | D/F 7              | 35                  | 0       | 25  | 4    | 29    | 82.9%             | 4.1              | 120            | 52                                       |
|                            | Pooled Total       | 1008                | 615     | 297 | 33   | 945   | 93.8%             | 2.7              | 2557           |                                          |
|                            | Pooled Resident    | 664                 | 460     | 140 | 11   | 611   | 92.0%             | 2.5              | 1535           |                                          |
|                            | Pooled Nonresident | 344                 | 155     | 157 | 22   | 334   | 97.1%             | 3.1              | 1022           |                                          |
| 74 Deer Creek              | Limited 1<br>D/F 6 | 189                 | 181     | 5   | 0    | 186   | 98.4%             | 2.8              | 523            | 202                                      |
|                            |                    | 157                 | 0       | 113 | 14   | 127   | 80.9%             | 3.6              | 452            | 173                                      |
|                            | Pooled Total       | 285                 | 181     | 118 | 14   | 313   | 109.8%            | 3.1              | 975            |                                          |
|                            | Pooled Resident    | 223                 | 145     | 90  | 14   | 249   | 111.7%            | 3.2              | 807            |                                          |
|                            | Pooled Nonresident | 62                  | 36      | 28  | 0    | 64    | 103.2%            | 2.6              | 168            |                                          |
| 75 Badwater                | Limited 1<br>D/F 6 | 382                 | 331     | 0   | 0    | 331   | 86.6%             | 3.2              | 1049           | 404                                      |
|                            |                    | 251                 | 0       | 208 | 14   | 222   | 88.4%             | 3.2              | 714            | 273                                      |
|                            | Pooled Total       | 578                 | 331     | 208 | 14   | 553   | 95.7%             | 3.2              | 1763           |                                          |
|                            | Pooled Resident    | 437                 | 261     | 137 | 14   | 412   | 94.3%             | 3.1              | 1283           |                                          |
|                            | Pooled Nonresident | 141                 | 70      | 71  | 0    | 141   | 100.0%            | 3.4              | 480            |                                          |
| 76 Copper Mountain         | Limited 1<br>D/F 6 | 89                  | 72      | 0   | 0    | 72    | 80.9%             | 5.3              | 383            | 100                                      |
|                            |                    | 33                  | 0       | 24  | 5    | 29    | 87.9%             | 3.5              | 101            | 36                                       |
|                            | Pooled Total       | 102                 | 72      | 24  | 5    | 101   | 99.0%             | 4.8              | 484            |                                          |
|                            | Pooled Resident    | 78                  | 56      | 18  | 3    | 77    | 98.7%             | 5.6              | 430            |                                          |
|                            | Pooled Nonresident | 24                  | 16      | 6   | 2    | 24    | 100.0%            | 2.3              | 54             |                                          |

TABLE I-A (Continued)

**ANTELOPE HUNT AREA REPORT**

| AREA<br>(cross hunt areas) | TYPE               | ACTIVE<br>LICS/HTRS | HARVEST |     |      |       | HUNTER<br>SUCCESS | DAYS/<br>HARVEST | HUNTER<br>DAYS | LICENSES<br>SOLD<br>(cross hunt<br>incl) |
|----------------------------|--------------------|---------------------|---------|-----|------|-------|-------------------|------------------|----------------|------------------------------------------|
|                            |                    |                     | BUCK    | DOE | FAWN | TOTAL |                   |                  |                |                                          |
| 77 Fifteen Mile Creek      |                    |                     |         |     |      |       |                   |                  |                |                                          |
|                            | Limited 1          | 52                  | 46      | 0   | 0    | 46    | 88.5%             | 4.7              | 218            | 54                                       |
|                            | D/F 6              | 28                  | 0       | 24  | 1    | 25    | 89.3%             | 3.3              | 83             | 31                                       |
|                            | D/F 7              | 25                  | 0       | 9   | 12   | 21    | 84.0%             | 2.7              | 56             | 25                                       |
|                            | Pooled Total       | 92                  | 46      | 33  | 13   | 92    | 100.0%            | 3.9              | 357            |                                          |
|                            | Pooled Resident    | 70                  | 32      | 25  | 10   | 67    | 95.7%             | 4.3              | 287            |                                          |
|                            | Pooled Nonresident | 22                  | 14      | 8   | 3    | 25    | 113.6%            | 2.8              | 70             |                                          |
| 78 McCullough Peaks        |                    |                     |         |     |      |       |                   |                  |                |                                          |
|                            | Limited 1          | 41                  | 37      | 1   | 0    | 38    | 92.7%             | 4.2              | 158            | 50                                       |
|                            | D/F 6              | 49                  | 0       | 34  | 4    | 38    | 77.6%             | 5.0              | 190            | 51                                       |
|                            | D/F 7              | 24                  | 0       | 23  | 0    | 23    | 95.8%             | 4.7              | 109            | 35                                       |
|                            | Pooled Total       | 90                  | 37      | 58  | 4    | 99    | 110.0%            | 4.6              | 457            |                                          |
|                            | Pooled Resident    | 71                  | 29      | 39  | 4    | 72    | 101.4%            | 4.7              | 341            |                                          |
|                            | Pooled Nonresident | 19                  | 8       | 19  | 0    | 27    | 142.1%            | 4.3              | 116            |                                          |
| 79 Crystal Creek           |                    |                     |         |     |      |       |                   |                  |                |                                          |
| (116)                      | Limited 9          | 17                  | 10      | 0   | 0    | 10    | 58.8%             | 15.2             | 152            | 30                                       |
|                            | Pooled Total       | 17                  | 10      | 0   | 0    | 10    | 58.8%             | 15.2             | 152            |                                          |
|                            | Pooled Resident    | 14                  | 7       | 0   | 0    | 7     | 50.0%             | 19.6             | 137            |                                          |
|                            | Pooled Nonresident | 3                   | 3       | 0   | 0    | 3     | 100.0%            | 5.0              | 15             |                                          |
| 80 Badger Basin            |                    |                     |         |     |      |       |                   |                  |                |                                          |
|                            | Limited 1          | 101                 | 95      | 0   | 0    | 95    | 94.1%             | 3.8              | 362            | 106                                      |
|                            | D/F 6              | 92                  | 0       | 75  | 6    | 81    | 88.0%             | 3.2              | 256            | 101                                      |
|                            | Pooled Total       | 168                 | 95      | 75  | 6    | 176   | 104.8%            | 3.5              | 618            |                                          |
|                            | Pooled Resident    | 133                 | 73      | 60  | 4    | 137   | 103.0%            | 3.9              | 533            |                                          |
|                            | Pooled Nonresident | 35                  | 22      | 15  | 2    | 39    | 111.4%            | 2.2              | 85             |                                          |
| 81 South Fork              |                    |                     |         |     |      |       |                   |                  |                |                                          |
|                            | Limited 1          | 25                  | 23      | 0   | 0    | 23    | 92.0%             | 4.9              | 112            | 25                                       |
|                            | Limited 2          | 47                  | 37      | 2   | 0    | 39    | 83.0%             | 2.4              | 95             | 51                                       |
|                            | Pooled Total       | 72                  | 60      | 2   | 0    | 62    | 86.1%             | 3.3              | 207            |                                          |
|                            | Pooled Resident    | 56                  | 46      | 2   | 0    | 48    | 85.7%             | 3.7              | 178            |                                          |
|                            | Pooled Nonresident | 16                  | 14      | 0   | 0    | 14    | 87.5%             | 2.1              | 29             |                                          |
| 82 North Greybull River    |                    |                     |         |     |      |       |                   |                  |                |                                          |
|                            | Limited 1          | 71                  | 68      | 2   | 0    | 70    | 98.6%             | 2.7              | 190            | 80                                       |
|                            | D/F 6              | 35                  | 0       | 33  | 0    | 33    | 94.3%             | 3.1              | 102            | 35                                       |
|                            | Pooled Total       | 92                  | 68      | 35  | 0    | 103   | 112.0%            | 2.8              | 292            |                                          |
|                            | Pooled Resident    | 72                  | 52      | 31  | 0    | 83    | 115.3%            | 2.9              | 242            |                                          |
|                            | Pooled Nonresident | 20                  | 16      | 4   | 0    | 20    | 100.0%            | 2.5              | 50             |                                          |
| 83 Owl Creek               |                    |                     |         |     |      |       |                   |                  |                |                                          |
|                            | Limited 1          | 72                  | 61      | 5   | 0    | 66    | 91.7%             | 2.7              | 176            | 78                                       |
|                            | D/F 6              | 47                  | 0       | 40  | 5    | 45    | 95.7%             | 7.9              | 354            | 50                                       |
|                            | Pooled Total       | 102                 | 61      | 45  | 5    | 111   | 108.8%            | 4.8              | 530            |                                          |
|                            | Pooled Resident    | 79                  | 46      | 39  | 5    | 90    | 113.9%            | 5.4              | 482            |                                          |
|                            | Pooled Nonresident | 23                  | 15      | 6   | 0    | 21    | 91.3%             | 2.3              | 48             |                                          |
| 84 Wind River              |                    |                     |         |     |      |       |                   |                  |                |                                          |
|                            | Limited 1          | 32                  | 23      | 3   | 0    | 26    | 81.3%             | 3.9              | 101            | 36                                       |
|                            | D/F 6              | 23                  | 0       | 18  | 1    | 19    | 82.6%             | 4.8              | 91             | 25                                       |
|                            | Pooled Total       | 38                  | 23      | 21  | 1    | 45    | 118.4%            | 4.3              | 192            |                                          |
|                            | Pooled Resident    | 29                  | 16      | 17  | 0    | 33    | 113.8%            | 4.9              | 163            |                                          |
|                            | Pooled Nonresident | 9                   | 7       | 4   | 1    | 12    | 133.3%            | 2.4              | 29             |                                          |
| 85 Gros Ventre             |                    |                     |         |     |      |       |                   |                  |                |                                          |
|                            | Limited 1          | 15                  | 11      | 2   | 0    | 13    | 86.7%             | 6.1              | 79             | 16                                       |
|                            | Pooled Total       | 15                  | 11      | 2   | 0    | 13    | 86.7%             | 6.1              | 79             |                                          |
|                            | Pooled Resident    | 12                  | 8       | 2   | 0    | 10    | 83.3%             | 6.6              | 66             |                                          |
|                            | Pooled Nonresident | 3                   | 3       | 0   | 0    | 3     | 100.0%            | 4.3              | 13             |                                          |

TABLE I-A (Continued)

**ANTELOPE HUNT AREA REPORT**

| AREA<br>(cross hunt areas) | TYPE               | ACTIVE<br>LICS/HTRS | HARVEST |     |      |       | HUNTER<br>SUCCESS | DAYS/<br>HARVEST | HUNTER<br>DAYS | LICENSES<br>SOLD<br>(cross hunt<br>incl) |
|----------------------------|--------------------|---------------------|---------|-----|------|-------|-------------------|------------------|----------------|------------------------------------------|
|                            |                    |                     | BUCK    | DOE | FAWN | TOTAL |                   |                  |                |                                          |
| 86 Hoback                  |                    |                     |         |     |      |       |                   |                  |                |                                          |
|                            | Limited 1          | 32                  | 24      | 0   | 0    | 24    | 75.0%             | 5.4              | 130            | 34                                       |
|                            | D/F 6              | 20                  | 0       | 7   | 1    | 8     | 40.0%             | 12.6             | 101            | 25                                       |
|                            | Pooled Total       | 41                  | 24      | 7   | 1    | 32    | 78.0%             | 7.2              | 231            |                                          |
|                            | Pooled Resident    | 28                  | 19      | 3   | 0    | 22    | 78.6%             | 9.5              | 210            |                                          |
|                            | Pooled Nonresident | 13                  | 5       | 4   | 1    | 10    | 76.9%             | 2.1              | 21             |                                          |
| 87 Pinedale                |                    |                     |         |     |      |       |                   |                  |                |                                          |
|                            | Limited 1          | 186                 | 177     | 0   | 0    | 177   | 95.2%             | 3.1              | 542            | 203                                      |
|                            | Limited 2          | 132                 | 102     | 4   | 0    | 106   | 80.3%             | 4.4              | 471            | 152                                      |
|                            | D/F 6              | 230                 | 0       | 176 | 35   | 211   | 91.7%             | 3.0              | 632            | 250                                      |
|                            | D/F 7              | 232                 | 0       | 180 | 26   | 206   | 88.8%             | 4.6              | 951            | 250                                      |
|                            | Pooled Total       | 673                 | 279     | 360 | 61   | 700   | 104.0%            | 3.7              | 2596           |                                          |
|                            | Pooled Resident    | 389                 | 207     | 133 | 43   | 383   | 98.5%             | 3.9              | 1478           |                                          |
|                            | Pooled Nonresident | 284                 | 72      | 227 | 18   | 317   | 111.6%            | 3.5              | 1118           |                                          |
| 88 Beaver                  |                    |                     |         |     |      |       |                   |                  |                |                                          |
|                            | Limited 1          | 236                 | 173     | 17  | 9    | 199   | 84.3%             | 3.1              | 610            | 254                                      |
|                            | D/F 6              | 239                 | 0       | 174 | 24   | 198   | 82.8%             | 3.3              | 663            | 275                                      |
|                            | Pooled Total       | 417                 | 173     | 191 | 33   | 397   | 95.2%             | 3.2              | 1273           |                                          |
|                            | Pooled Resident    | 249                 | 140     | 64  | 14   | 218   | 87.6%             | 3.4              | 738            |                                          |
|                            | Pooled Nonresident | 168                 | 33      | 127 | 19   | 179   | 106.5%            | 3.0              | 535            |                                          |
| 89 Piney                   |                    |                     |         |     |      |       |                   |                  |                |                                          |
|                            | Limited 1          | 249                 | 206     | 0   | 0    | 206   | 82.7%             | 3.4              | 701            | 252                                      |
|                            | D/F 6              | 149                 | 0       | 126 | 6    | 132   | 88.6%             | 2.1              | 274            | 176                                      |
|                            | D/F 7              | 77                  | 0       | 57  | 8    | 65    | 84.4%             | 2.5              | 165            | 79                                       |
|                            | Pooled Total       | 414                 | 206     | 183 | 14   | 403   | 97.3%             | 2.8              | 1140           |                                          |
|                            | Pooled Resident    | 325                 | 163     | 133 | 10   | 306   | 94.2%             | 2.8              | 872            |                                          |
|                            | Pooled Nonresident | 89                  | 43      | 50  | 4    | 97    | 109.0%            | 2.8              | 268            |                                          |
| 90 Yellow Point            |                    |                     |         |     |      |       |                   |                  |                |                                          |
|                            | Limited 1          | 185                 | 174     | 0   | 0    | 174   | 94.1%             | 2.2              | 380            | 207                                      |
|                            | Limited 2          | 177                 | 156     | 10  | 0    | 166   | 93.8%             | 2.3              | 390            | 202                                      |
|                            | D/F 6              | 144                 | 0       | 115 | 17   | 132   | 91.7%             | 3.7              | 492            | 175                                      |
|                            | D/F 7              | 130                 | 0       | 112 | 2    | 114   | 87.7%             | 2.7              | 309            | 175                                      |
|                            | Pooled Total       | 557                 | 330     | 237 | 19   | 586   | 105.2%            | 2.7              | 1571           |                                          |
|                            | Pooled Resident    | 328                 | 244     | 73  | 9    | 326   | 99.4%             | 2.5              | 820            |                                          |
|                            | Pooled Nonresident | 229                 | 86      | 164 | 10   | 260   | 113.5%            | 2.9              | 751            |                                          |
| 91 Dry Sandy               |                    |                     |         |     |      |       |                   |                  |                |                                          |
|                            | Limited 1          | 373                 | 348     | 0   | 0    | 348   | 93.3%             | 2.3              | 783            | 403                                      |
|                            | D/F 6              | 93                  | 0       | 67  | 13   | 80    | 86.0%             | 1.9              | 148            | 127                                      |
|                            | D/F 7              | 25                  | 0       | 17  | 3    | 20    | 80.0%             | 3.7              | 74             | 25                                       |
|                            | Pooled Total       | 465                 | 348     | 84  | 16   | 448   | 96.3%             | 2.2              | 1005           |                                          |
|                            | Pooled Resident    | 356                 | 266     | 47  | 11   | 324   | 91.0%             | 2.2              | 701            |                                          |
|                            | Pooled Nonresident | 109                 | 82      | 37  | 5    | 124   | 113.8%            | 2.5              | 304            |                                          |
| 92 Steamboat               |                    |                     |         |     |      |       |                   |                  |                |                                          |
|                            | Limited 1          | 294                 | 261     | 0   | 0    | 261   | 88.8%             | 3.6              | 943            | 303                                      |
|                            | D/F 6              | 82                  | 0       | 65  | 2    | 67    | 81.7%             | 4.3              | 290            | 101                                      |
|                            | D/F 7              | 23                  | 0       | 17  | 3    | 20    | 87.0%             | 2.5              | 50             | 25                                       |
|                            | Pooled Total       | 354                 | 261     | 82  | 5    | 348   | 98.3%             | 3.7              | 1283           |                                          |
|                            | Pooled Resident    | 273                 | 202     | 58  | 0    | 260   | 95.2%             | 4.0              | 1040           |                                          |
|                            | Pooled Nonresident | 81                  | 59      | 24  | 5    | 88    | 108.6%            | 2.8              | 243            |                                          |
| 93 West Green River        |                    |                     |         |     |      |       |                   |                  |                |                                          |
|                            | Limited 1          | 649                 | 601     | 0   | 0    | 601   | 92.6%             | 2.9              | 1730           | 703                                      |
|                            | D/F 6              | 534                 | 0       | 440 | 48   | 488   | 91.4%             | 2.7              | 1327           | 600                                      |
|                            | D/F 7              | 86                  | 0       | 68  | 12   | 80    | 93.0%             | 3.7              | 292            | 100                                      |
|                            | Pooled Total       | 1170                | 601     | 508 | 60   | 1169  | 99.9%             | 2.9              | 3349           |                                          |
|                            | Pooled Resident    | 730                 | 463     | 235 | 34   | 732   | 100.3%            | 2.8              | 2070           |                                          |
|                            | Pooled Nonresident | 440                 | 138     | 273 | 26   | 437   | 99.3%             | 2.9              | 1279           |                                          |

TABLE I-A (Continued)

**ANTELOPE HUNT AREA REPORT**

| AREA<br>(cross hunt areas) | TYPE               | ACTIVE<br>LICS/HTRS | HARVEST |     |      |       | HUNTER<br>SUCCESS | DAYS/<br>HARVEST | HUNTER<br>DAYS | LICENSES<br>SOLD     |
|----------------------------|--------------------|---------------------|---------|-----|------|-------|-------------------|------------------|----------------|----------------------|
|                            |                    |                     | BUCK    | DOE | FAWN | TOTAL |                   |                  |                | (cross hunt<br>incl) |
|                            |                    |                     |         |     |      |       |                   |                  |                |                      |
| 94 Carter Lease            |                    |                     |         |     |      |       |                   |                  |                |                      |
|                            | Limited 1          | 464                 | 409     | 0   | 0    | 409   | 88.1%             | 3.4              | 1379           | 501                  |
|                            | D/F 6              | 158                 | 0       | 110 | 19   | 129   | 81.6%             | 3.5              | 452            | 202                  |
|                            | D/F 7              | 264                 | 0       | 217 | 21   | 238   | 90.2%             | 3.6              | 849            | 301                  |
|                            | Pooled Total       | 805                 | 409     | 327 | 40   | 776   | 96.4%             | 3.5              | 2680           |                      |
|                            | Pooled Resident    | 514                 | 314     | 132 | 14   | 460   | 89.5%             | 4.1              | 1890           |                      |
|                            | Pooled Nonresident | 291                 | 95      | 195 | 26   | 316   | 108.6%            | 2.5              | 790            |                      |
|                            |                    |                     |         |     |      |       |                   |                  |                |                      |
| 95 Cedar Mountain          | Limited 1          | 315                 | 290     | 5   | 0    | 295   | 93.7%             | 3.5              | 1043           | 331                  |
|                            | D/F 7              | 43                  | 0       | 30  | 6    | 36    | 83.7%             | 3.1              | 112            | 51                   |
|                            | Pooled Total       | 336                 | 290     | 35  | 6    | 331   | 98.5%             | 3.5              | 1155           |                      |
|                            | Pooled Resident    | 259                 | 222     | 31  | 0    | 253   | 97.7%             | 3.8              | 949            |                      |
|                            | Pooled Nonresident | 77                  | 68      | 4   | 6    | 78    | 101.3%            | 2.6              | 206            |                      |
|                            |                    |                     |         |     |      |       |                   |                  |                |                      |
|                            | 96 West Farson     | Limited 1           | 261     | 213 | 0    | 0     | 213               | 81.6%            | 4.4            | 934                  |
| D/F 6                      |                    | 114                 | 0       | 96  | 5    | 101   | 88.6%             | 3.2              | 320            | 125                  |
| D/F 7                      |                    | 22                  | 0       | 21  | 0    | 21    | 95.5%             | 4.2              | 88             | 25                   |
| Pooled Total               |                    | 341                 | 213     | 117 | 5    | 335   | 98.2%             | 4.0              | 1342           |                      |
| Pooled Resident            |                    | 237                 | 161     | 60  | 0    | 221   | 93.2%             | 4.5              | 987            |                      |
| Pooled Nonresident         |                    | 104                 | 52      | 57  | 5    | 114   | 109.6%            | 3.1              | 355            |                      |
|                            |                    |                     |         |     |      |       |                   |                  |                |                      |
| 97 Boysen                  | (117) Limited 1    | 110                 | 102     | 0   | 0    | 102   | 92.7%             | 2.8              | 282            | 126                  |
|                            | (117) D/F 6        | 105                 | 0       | 94  | 5    | 99    | 94.3%             | 2.4              | 236            | 111                  |
|                            | (117) D/F 7        | 13                  | 0       | 11  | 0    | 11    | 84.6%             | 4.7              | 52             | 20                   |
|                            | Pooled Total       | 165                 | 102     | 105 | 5    | 212   | 128.5%            | 2.7              | 570            |                      |
|                            | Pooled Resident    | 127                 | 82      | 82  | 2    | 166   | 130.7%            | 2.7              | 444            |                      |
|                            | Pooled Nonresident | 38                  | 20      | 23  | 3    | 46    | 121.1%            | 2.7              | 126            |                      |
|                            |                    |                     |         |     |      |       |                   |                  |                |                      |
| 98 Sage                    | Limited 1          | 157                 | 148     | 0   | 0    | 148   | 94.3%             | 3.8              | 569            | 157                  |
|                            | D/F 6              | 249                 | 0       | 181 | 38   | 219   | 88.0%             | 3.0              | 650            | 300                  |
|                            | Pooled Total       | 365                 | 148     | 181 | 38   | 367   | 100.5%            | 3.3              | 1219           |                      |
|                            | Pooled Resident    | 148                 | 113     | 16  | 10   | 139   | 93.9%             | 3.7              | 517            |                      |
|                            | Pooled Nonresident | 217                 | 35      | 165 | 28   | 228   | 105.1%            | 3.1              | 702            |                      |
|                            |                    |                     |         |     |      |       |                   |                  |                |                      |
|                            | 99 Uinta           | Limited 1           | 116     | 96  | 0    | 0     | 96                | 82.8%            | 4.5            | 432                  |
| D/F 6                      |                    | 83                  | 0       | 62  | 5    | 67    | 80.7%             | 4.4              | 294            | 100                  |
| D/F 7                      |                    | 181                 | 0       | 119 | 40   | 159   | 87.8%             | 3.2              | 505            | 199                  |
| Limited 8                  |                    | 48                  | 38      | 0   | 0    | 38    | 79.2%             | 5.2              | 199            | 51                   |
| Pooled Total               |                    | 348                 | 134     | 181 | 45   | 360   | 103.4%            | 4.0              | 1430           |                      |
| Pooled Resident            |                    | 214                 | 99      | 67  | 25   | 191   | 89.3%             | 4.7              | 899            |                      |
| Pooled Nonresident         |                    | 134                 | 35      | 114 | 20   | 169   | 126.1%            | 3.1              | 531            |                      |
|                            |                    |                     |         |     |      |       |                   |                  |                |                      |
| 100 Bear River Divide      | Limited 1          | 93                  | 86      | 1   | 3    | 90    | 96.8%             | 3.0              | 267            | 100                  |
|                            | D/F 6              | 227                 | 0       | 159 | 26   | 185   | 81.5%             | 3.6              | 665            | 300                  |
|                            | Pooled Total       | 284                 | 86      | 160 | 29   | 275   | 96.8%             | 3.4              | 932            |                      |
|                            | Pooled Resident    | 109                 | 67      | 33  | 12   | 112   | 102.8%            | 3.0              | 340            |                      |
|                            | Pooled Nonresident | 175                 | 19      | 127 | 17   | 163   | 93.1%             | 3.6              | 592            |                      |
|                            |                    |                     |         |     |      |       |                   |                  |                |                      |
|                            | 102 Buffalo        | Limited 1           | 381     | 289 | 28   | 0     | 317               | 83.2%            | 3.3            | 1057                 |
| D/F 6                      |                    | 316                 | 0       | 208 | 73   | 281   | 88.9%             | 3.2              | 894            | 350                  |
| Pooled Total               |                    | 649                 | 289     | 236 | 73   | 598   | 92.1%             | 3.3              | 1951           |                      |
| Pooled Resident            |                    | 175                 | 53      | 71  | 10   | 134   | 76.6%             | 3.2              | 424            |                      |
| Pooled Nonresident         |                    | 474                 | 236     | 165 | 63   | 464   | 97.9%             | 3.3              | 1527           |                      |
|                            |                    |                     |         |     |      |       |                   |                  |                |                      |
| 103 Dwyer                  |                    | Limited 1           | 343     | 284 | 15   | 0     | 299               | 87.2%            | 3.0            | 901                  |
|                            | D/F 6              | 48                  | 0       | 42  | 0    | 42    | 87.5%             | 2.6              | 110            | 50                   |
|                            | D/F 7              | 168                 | 0       | 126 | 21   | 147   | 87.5%             | 3.7              | 541            | 200                  |
|                            | Pooled Total       | 486                 | 284     | 183 | 21   | 488   | 100.4%            | 3.2              | 1552           |                      |
|                            | Pooled Resident    | 242                 | 152     | 99  | 7    | 258   | 106.6%            | 3.4              | 867            |                      |
|                            | Pooled Nonresident | 244                 | 132     | 84  | 14   | 230   | 94.3%             | 3.0              | 685            |                      |

TABLE I-A (Continued)

**ANTELOPE HUNT AREA REPORT**

| AREA<br>(cross hunt areas) | TYPE               | ACTIVE<br>LICS/HTRS | HARVEST |     |      |       | HUNTER<br>SUCCESS | DAYS/<br>HARVEST | HUNTER<br>DAYS | LICENSES<br>SOLD<br>(cross hunt<br>incl) |
|----------------------------|--------------------|---------------------|---------|-----|------|-------|-------------------|------------------|----------------|------------------------------------------|
|                            |                    |                     | BUCK    | DOE | FAWN | TOTAL |                   |                  |                |                                          |
| 104 Crow Creek             | Limited 1<br>D/F 6 | 189                 | 134     | 12  | 0    | 146   | 77.2%             | 4.9              | 713            | 204                                      |
|                            |                    | 161                 | 0       | 101 | 21   | 122   | 75.8%             | 3.5              | 423            | 175                                      |
|                            | Pooled Total       | 277                 | 134     | 113 | 21   | 268   | 96.8%             | 4.2              | 1136           |                                          |
|                            | Pooled Resident    | 151                 | 61      | 50  | 14   | 125   | 82.8%             | 5.4              | 672            |                                          |
|                            | Pooled Nonresident | 126                 | 73      | 63  | 7    | 143   | 113.5%            | 3.2              | 464            |                                          |
| 106 Long Creek             | Limited 1<br>D/F 6 | 270                 | 216     | 4   | 0    | 220   | 81.5%             | 3.1              | 674            | 274                                      |
|                            |                    | 170                 | 0       | 127 | 7    | 134   | 78.8%             | 3.2              | 429            | 200                                      |
|                            | Pooled Total       | 386                 | 216     | 131 | 7    | 354   | 91.7%             | 3.1              | 1103           |                                          |
|                            | Pooled Resident    | 249                 | 148     | 55  | 4    | 207   | 83.1%             | 3.2              | 664            |                                          |
|                            | Pooled Nonresident | 137                 | 68      | 76  | 3    | 147   | 107.3%            | 3.0              | 439            |                                          |
| 107 Upper Sweetwater       | Limited 1<br>D/F 6 | 102                 | 80      | 4   | 2    | 86    | 84.3%             | 2.7              | 235            | 106                                      |
|                            |                    | 118                 | 0       | 103 | 11   | 114   | 96.6%             | 2.7              | 304            | 150                                      |
|                            | Limited 8          | 124                 | 58      | 11  | 0    | 69    | 55.6%             | 5.6              | 389            | 134                                      |
|                            | Pooled Total       | 307                 | 138     | 118 | 13   | 269   | 87.6%             | 3.4              | 928            |                                          |
|                            | Pooled Resident    | 184                 | 92      | 35  | 2    | 129   | 70.1%             | 3.9              | 507            |                                          |
|                            | Pooled Nonresident | 123                 | 46      | 83  | 11   | 140   | 113.8%            | 3.0              | 421            |                                          |
| 108 Bridger Pass           | Limited 1          | 92                  | 80      | 0   | 0    | 80    | 87.0%             | 2.8              | 222            | 106                                      |
|                            |                    | 92                  | 80      | 0   | 0    | 80    | 87.0%             | 2.8              | 222            |                                          |
|                            |                    | 68                  | 56      | 0   | 0    | 56    | 82.4%             | 2.9              | 165            |                                          |
|                            |                    | 24                  | 24      | 0   | 0    | 24    | 100.0%            | 2.4              | 57             |                                          |
| 109 Beckton                | Limited 1<br>D/F 6 | 185                 | 135     | 0   | 0    | 135   | 73.0%             | 4.6              | 616            | 203                                      |
|                            |                    | 151                 | 0       | 107 | 6    | 113   | 74.8%             | 4.1              | 458            | 173                                      |
|                            | Pooled Total       | 283                 | 135     | 107 | 6    | 248   | 87.6%             | 4.3              | 1074           |                                          |
|                            | Pooled Resident    | 97                  | 48      | 16  | 0    | 64    | 66.0%             | 5.5              | 350            |                                          |
|                            | Pooled Nonresident | 186                 | 87      | 91  | 6    | 184   | 98.9%             | 3.9              | 724            |                                          |
| 110 South Greybull River   | Limited 1<br>D/F 6 | 59                  | 58      | 0   | 0    | 58    | 98.3%             | 2.3              | 136            | 63                                       |
|                            |                    | 22                  | 0       | 19  | 0    | 19    | 86.4%             | 3.4              | 64             | 25                                       |
|                            | Pooled Total       | 77                  | 58      | 19  | 0    | 77    | 100.0%            | 2.6              | 200            |                                          |
|                            | Pooled Resident    | 61                  | 48      | 15  | 0    | 63    | 103.3%            | 2.4              | 152            |                                          |
|                            | Pooled Nonresident | 16                  | 10      | 4   | 0    | 14    | 87.5%             | 3.4              | 48             |                                          |
| 111 Chalk Bluffs           | Limited 1<br>D/F 6 | 146                 | 118     | 0   | 7    | 125   | 85.6%             | 3.9              | 492            | 150                                      |
|                            |                    | 168                 | 0       | 88  | 25   | 113   | 67.3%             | 3.5              | 390            | 200                                      |
|                            | Pooled Total       | 276                 | 118     | 88  | 32   | 238   | 86.2%             | 3.7              | 882            |                                          |
|                            | Pooled Resident    | 170                 | 85      | 31  | 16   | 132   | 77.6%             | 4.3              | 570            |                                          |
|                            | Pooled Nonresident | 106                 | 33      | 57  | 16   | 106   | 100.0%            | 2.9              | 312            |                                          |
| 112 Pine Mountain          | Limited 1<br>D/F 6 | 163                 | 150     | 0   | 0    | 150   | 92.0%             | 3.3              | 488            | 177                                      |
|                            |                    | 61                  | 0       | 41  | 10   | 51    | 83.6%             | 4.4              | 224            | 76                                       |
|                            | Pooled Total       | 178                 | 150     | 41  | 10   | 201   | 112.9%            | 3.5              | 712            |                                          |
|                            | Pooled Resident    | 136                 | 121     | 25  | 5    | 151   | 111.0%            | 3.8              | 573            |                                          |
|                            | Pooled Nonresident | 42                  | 29      | 16  | 5    | 50    | 119.0%            | 2.8              | 139            |                                          |
| 113 Salt Creek             | Limited 1          | 170                 | 149     | 5   | 0    | 154   | 90.6%             | 2.8              | 438            | 177                                      |
|                            | Limited 2          | 135                 | 127     | 2   | 4    | 133   | 98.5%             | 2.5              | 338            | 154                                      |
|                            | D/F 6              | 243                 | 0       | 217 | 13   | 230   | 94.7%             | 3.0              | 688            | 247                                      |
|                            | Pooled Total       | 439                 | 276     | 224 | 17   | 517   | 117.8%            | 2.8              | 1464           |                                          |
|                            | Pooled Resident    | 101                 | 58      | 54  | 0    | 112   | 110.9%            | 2.9              | 328            |                                          |
|                            | Pooled Nonresident | 338                 | 218     | 170 | 17   | 405   | 119.8%            | 2.8              | 1136           |                                          |

TABLE I-A (Continued)

**ANTELOPE HUNT AREA REPORT**

| AREA<br>(cross hunt areas) | TYPE      | ACTIVE<br>LICS/HTRS | HARVEST |     |      |       | HUNTER<br>SUCCESS | DAYS/<br>HARVEST | HUNTER<br>DAYS | LICENSES<br>SOLD<br>(cross hunt<br>incl) |
|----------------------------|-----------|---------------------|---------|-----|------|-------|-------------------|------------------|----------------|------------------------------------------|
|                            |           |                     | BUCK    | DOE | FAWN | TOTAL |                   |                  |                |                                          |
| 114 Nowater                |           |                     |         |     |      |       |                   |                  |                |                                          |
|                            | Limited 1 | 55                  | 44      | 0   | 0    | 44    | 80.0%             | 4.7              | 205            | 57                                       |
|                            | D/F 6     | 25                  | 0       | 23  | 0    | 23    | 92.0%             | 2.8              | 64             | 26                                       |
| Pooled Total               |           | 71                  | 44      | 23  | 0    | 67    | 94.4%             | 4.0              | 269            |                                          |
| Pooled Resident            |           | 50                  | 29      | 13  | 0    | 42    | 84.0%             | 5.2              | 217            |                                          |
| Pooled Nonresident         |           | 21                  | 15      | 10  | 0    | 25    | 119.0%            | 2.1              | 52             |                                          |
| 115 Upper Nowood           |           |                     |         |     |      |       |                   |                  |                |                                          |
|                            | Limited 1 | 92                  | 84      | 0   | 0    | 84    | 91.3%             | 2.7              | 227            | 102                                      |
|                            | D/F 6     | 112                 | 0       | 89  | 11   | 100   | 89.3%             | 3.2              | 322            | 125                                      |
| Pooled Total               |           | 188                 | 84      | 89  | 11   | 184   | 97.9%             | 3.0              | 549            |                                          |
| Pooled Resident            |           | 90                  | 62      | 23  | 4    | 89    | 98.9%             | 2.7              | 237            |                                          |
| Pooled Nonresident         |           | 98                  | 22      | 66  | 7    | 95    | 96.9%             | 3.3              | 312            |                                          |
| 116 Manderson              |           |                     |         |     |      |       |                   |                  |                |                                          |
| (79)                       | Limited 9 | 13                  | 6       | 0   | 0    | 6     | 46.2%             | 11.8             | 71             | 30                                       |
| Pooled Total               |           | 13                  | 6       | 0   | 0    | 6     | 46.2%             | 11.8             | 71             |                                          |
| Pooled Resident            |           | 10                  | 3       | 0   | 0    | 3     | 30.0%             | 17.7             | 53             |                                          |
| Pooled Nonresident         |           | 3                   | 3       | 0   | 0    | 3     | 100.0%            | 6.0              | 18             |                                          |
| 117 Crowheart Butte        |           |                     |         |     |      |       |                   |                  |                |                                          |
| (97)                       | Limited 1 | 10                  | 3       | 2   | 0    | 5     | 50.0%             | 8.4              | 42             | 126                                      |
| (97)                       | D/F 6     | 3                   | 0       | 3   | 0    | 3     | 100.0%            | 3.3              | 10             | 111                                      |
| (97)                       | D/F 7     | 7                   | 0       | 5   | 2    | 7     | 100.0%            | 3.3              | 23             | 20                                       |
| Pooled Total               |           | 17                  | 3       | 10  | 2    | 15    | 88.2%             | 5.0              | 75             |                                          |
| Pooled Resident            |           | 9                   | 0       | 7   | 0    | 7     | 77.8%             | 6.9              | 48             |                                          |
| Pooled Nonresident         |           | 8                   | 3       | 3   | 2    | 8     | 100.0%            | 3.4              | 27             |                                          |

TABLE I-H  
ANTELOPE HARVEST  
BY HERD UNIT  
2007

| HERD                   | TYPE    | ACTIVE<br>LICS/HTRS | HARVEST |     |      |       | HUNTER<br>SUCCESS | DAYS/<br>HARVEST | HUNTER<br>DAYS | LICENSES<br>SOLD<br>(cross hunt<br>incl) |
|------------------------|---------|---------------------|---------|-----|------|-------|-------------------|------------------|----------------|------------------------------------------|
|                        |         |                     | BUCK    | DOE | FAWN | TOTAL |                   |                  |                |                                          |
| 202 Bighorn            | Limited | 28                  | 16      | 0   | 0    | 16    | 57.1%             | 13.9             | 223            | 30                                       |
| Total Hunters          |         | 28                  | 16      | 0   | 0    | 16    | 57.1%             | 13.9             | 223            |                                          |
| Resident               |         | 22                  | 10      | 0   | 0    | 10    | 45.5%             | 19.0             | 190            |                                          |
| Nonresident            |         | 6                   | 6       | 0   | 0    | 6     | 100.0%            | 5.5              | 33             |                                          |
| 203 Copper Mountain    | D/F     | 170                 | 0       | 136 | 16   | 152   | 89.4%             | 3.2              | 487            | 187                                      |
|                        | Limited | 236                 | 200     | 0   | 0    | 200   | 84.7%             | 4.1              | 815            | 259                                      |
| Total Hunters          |         | 360                 | 200     | 136 | 16   | 352   | 97.8%             | 3.7              | 1302           |                                          |
| Resident               |         | 217                 | 147     | 54  | 7    | 208   | 95.9%             | 4.3              | 884            |                                          |
| Nonresident            |         | 143                 | 53      | 82  | 9    | 144   | 100.7%            | 2.9              | 418            |                                          |
| 204 Fifteenmile        | D/F     | 122                 | 0       | 92  | 18   | 110   | 90.2%             | 5.1              | 557            | 131                                      |
|                        | Limited | 183                 | 165     | 5   | 0    | 170   | 92.9%             | 3.1              | 530            | 195                                      |
| Total Hunters          |         | 270                 | 165     | 97  | 18   | 280   | 103.7%            | 3.9              | 1087           |                                          |
| Resident               |         | 210                 | 126     | 79  | 15   | 220   | 104.8%            | 4.2              | 921            |                                          |
| Nonresident            |         | 60                  | 39      | 18  | 3    | 60    | 100.0%            | 2.8              | 166            |                                          |
| 205 Carter Mountain    | D/F     | 108                 | 0       | 90  | 4    | 94    | 87.0%             | 4.3              | 401            | 121                                      |
|                        | Limited | 184                 | 165     | 5   | 0    | 170   | 92.4%             | 3.3              | 555            | 206                                      |
| Total Hunters          |         | 254                 | 165     | 95  | 4    | 264   | 103.9%            | 3.6              | 956            |                                          |
| Resident               |         | 199                 | 127     | 72  | 4    | 203   | 102.0%            | 3.7              | 761            |                                          |
| Nonresident            |         | 55                  | 38      | 23  | 0    | 61    | 110.9%            | 3.2              | 195            |                                          |
| 207 Badger Basin       | D/F     | 92                  | 0       | 75  | 6    | 81    | 88.0%             | 3.2              | 256            | 101                                      |
|                        | Limited | 101                 | 95      | 0   | 0    | 95    | 94.1%             | 3.8              | 362            | 106                                      |
| Total Hunters          |         | 168                 | 95      | 75  | 6    | 176   | 104.8%            | 3.5              | 618            |                                          |
| Resident               |         | 133                 | 73      | 60  | 4    | 137   | 103.0%            | 3.9              | 533            |                                          |
| Nonresident            |         | 35                  | 22      | 15  | 2    | 39    | 111.4%            | 2.2              | 85             |                                          |
| 308 Clearmont          | D/F     | 365                 | 0       | 225 | 35   | 260   | 71.2%             | 4.8              | 1241           | 423                                      |
|                        | Limited | 523                 | 409     | 10  | 0    | 419   | 80.1%             | 5.0              | 2083           | 589                                      |
| Total Hunters          |         | 786                 | 409     | 235 | 35   | 679   | 86.4%             | 4.9              | 3324           |                                          |
| Resident               |         | 217                 | 144     | 39  | 15   | 198   | 91.2%             | 5.4              | 1062           |                                          |
| Nonresident            |         | 569                 | 265     | 196 | 20   | 481   | 84.5%             | 4.7              | 2262           |                                          |
| 309 Pumpkin Buttes     | D/F     | 965                 | 0       | 870 | 52   | 922   | 95.5%             | 3.1              | 2836           | 993                                      |
|                        | Limited | 1606                | 1452    | 0   | 0    | 1452  | 90.4%             | 2.9              | 4159           | 1648                                     |
| Total Hunters          |         | 2424                | 1452    | 870 | 52   | 2374  | 97.9%             | 2.9              | 6995           |                                          |
| Resident               |         | 378                 | 255     | 119 | 24   | 398   | 105.3%            | 2.6              | 1022           |                                          |
| Nonresident            |         | 2046                | 1197    | 751 | 28   | 1976  | 96.6%             | 3.0              | 5973           |                                          |
| 310 Upper Powder River | D/F     | 347                 | 0       | 242 | 33   | 275   | 79.3%             | 4.2              | 1152           | 380                                      |
|                        | Limited | 491                 | 375     | 8   | 8    | 391   | 79.6%             | 3.4              | 1334           | 538                                      |
| Total Hunters          |         | 758                 | 375     | 250 | 41   | 666   | 87.9%             | 3.7              | 2486           |                                          |
| Resident               |         | 115                 | 62      | 19  | 11   | 92    | 80.0%             | 3.9              | 363            |                                          |
| Nonresident            |         | 643                 | 313     | 231 | 30   | 574   | 89.3%             | 3.7              | 2123           |                                          |
| 316 Highlight          | D/F     | 489                 | 0       | 472 | 9    | 481   | 98.4%             | 2.2              | 1064           | 581                                      |
|                        | Limited | 624                 | 565     | 10  | 0    | 575   | 92.1%             | 3.3              | 1900           | 707                                      |
| Total Hunters          |         | 1027                | 565     | 482 | 9    | 1056  | 102.8%            | 2.8              | 2964           |                                          |
| Resident               |         | 245                 | 150     | 79  | 0    | 229   | 93.5%             | 4.7              | 1067           |                                          |
| Nonresident            |         | 782                 | 415     | 403 | 9    | 827   | 105.8%            | 2.3              | 1897           |                                          |
| 318 Crazy Woman        | D/F     | 599                 | 0       | 516 | 39   | 555   | 92.7%             | 2.6              | 1468           | 618                                      |
|                        | Limited | 782                 | 738     | 7   | 4    | 749   | 95.8%             | 2.4              | 1801           | 859                                      |
| Total Hunters          |         | 1177                | 738     | 523 | 43   | 1304  | 110.8%            | 2.5              | 3269           |                                          |
| Resident               |         | 214                 | 150     | 92  | 4    | 246   | 115.0%            | 2.2              | 548            |                                          |
| Nonresident            |         | 963                 | 588     | 431 | 39   | 1058  | 109.9%            | 2.6              | 2721           |                                          |
| 339 North Black Hills  | D/F     | 739                 | 0       | 560 | 60   | 620   | 83.9%             | 3.2              | 1993           | 1427                                     |
|                        | Limited | 1491                | 1251    | 43  | 5    | 1299  | 87.1%             | 3.3              | 4301           | 1598                                     |
| Total Hunters          |         | 1991                | 1251    | 603 | 65   | 1919  | 96.4%             | 3.3              | 6294           |                                          |
| Resident               |         | 420                 | 233     | 129 | 8    | 370   | 88.1%             | 4.4              | 1643           |                                          |
| Nonresident            |         | 1571                | 1018    | 474 | 57   | 1549  | 98.6%             | 3.0              | 4651           |                                          |

TABLE I-H (Continued)

**ANTELOPE** HERD UNIT REPORT

| HERD                     | TYPE    | ACTIVE<br>LICS/HTRS | HARVEST |      |      |       | HUNTER<br>SUCCESS | DAYS/<br>HARVEST | HUNTER<br>DAYS | LICENSES<br>SOLD<br>(cross hunt<br>incl) |
|--------------------------|---------|---------------------|---------|------|------|-------|-------------------|------------------|----------------|------------------------------------------|
|                          |         |                     | BUCK    | DOE  | FAWN | TOTAL |                   |                  |                |                                          |
| 351 Gillette             | D/F     | 585                 | 0       | 533  | 0    | 533   | 91.1%             | 2.9              | 1556           | 902                                      |
|                          | Limited | 976                 | 948     | 0    | 0    | 948   | 97.1%             | 3.2              | 3071           | 1049                                     |
| Total Hunters            |         | 1410                | 948     | 533  | 0    | 1481  | 105.0%            | 3.1              | 4627           |                                          |
| Resident                 |         | 456                 | 279     | 190  | 0    | 469   | 102.9%            | 3.1              | 1447           |                                          |
| Nonresident              |         | 954                 | 669     | 343  | 0    | 1012  | 106.1%            | 3.1              | 3180           |                                          |
| 352 Middle Fork          | D/F     | 330                 | 0       | 231  | 29   | 260   | 78.8%             | 3.4              | 878            | 361                                      |
|                          | Limited | 438                 | 363     | 32   | 6    | 401   | 91.6%             | 2.7              | 1069           | 457                                      |
| Total Hunters            |         | 725                 | 363     | 263  | 35   | 661   | 91.2%             | 2.9              | 1947           |                                          |
| Resident                 |         | 66                  | 56      | 5    | 5    | 66    | 100.0%            | 1.8              | 118            |                                          |
| Nonresident              |         | 659                 | 307     | 258  | 30   | 595   | 90.3%             | 3.1              | 1829           |                                          |
| 353 Ucross               | D/F     | 271                 | 0       | 225  | 16   | 241   | 88.9%             | 3.7              | 903            | 307                                      |
|                          | Limited | 533                 | 460     | 0    | 0    | 460   | 86.3%             | 3.2              | 1453           | 567                                      |
| Total Hunters            |         | 634                 | 460     | 225  | 16   | 701   | 110.6%            | 3.4              | 2356           |                                          |
| Resident                 |         | 158                 | 93      | 70   | 0    | 163   | 103.2%            | 4.3              | 708            |                                          |
| Nonresident              |         | 476                 | 367     | 155  | 16   | 538   | 113.0%            | 3.1              | 1648           |                                          |
| 354 Buffalo              | D/F     | 316                 | 0       | 208  | 73   | 281   | 88.9%             | 3.2              | 894            | 350                                      |
|                          | Limited | 381                 | 289     | 28   | 0    | 317   | 83.2%             | 3.3              | 1057           | 449                                      |
| Total Hunters            |         | 649                 | 289     | 236  | 73   | 598   | 92.1%             | 3.3              | 1951           |                                          |
| Resident                 |         | 175                 | 53      | 71   | 10   | 134   | 76.6%             | 3.2              | 424            |                                          |
| Nonresident              |         | 474                 | 236     | 165  | 63   | 464   | 97.9%             | 3.3              | 1527           |                                          |
| 355 Beckton              | D/F     | 151                 | 0       | 107  | 6    | 113   | 74.8%             | 4.1              | 458            | 173                                      |
|                          | Limited | 185                 | 135     | 0    | 0    | 135   | 73.0%             | 4.6              | 616            | 203                                      |
| Total Hunters            |         | 283                 | 135     | 107  | 6    | 248   | 87.6%             | 4.3              | 1074           |                                          |
| Resident                 |         | 97                  | 48      | 16   | 0    | 64    | 66.0%             | 5.5              | 350            |                                          |
| Nonresident              |         | 186                 | 87      | 91   | 6    | 184   | 98.9%             | 3.9              | 724            |                                          |
| 401 Sublette             | D/F     | 2318                | 0       | 1841 | 216  | 2057  | 88.7%             | 3.2              | 6480           | 2683                                     |
|                          | Limited | 3015                | 2584    | 48   | 11   | 2643  | 87.7%             | 3.1              | 8317           | 3248                                     |
| Total Hunters            |         | 4728                | 2584    | 1889 | 227  | 4700  | 99.4%             | 3.1              | 14797          |                                          |
| Resident                 |         | 3095                | 1965    | 843  | 123  | 2931  | 94.7%             | 3.2              | 9489           |                                          |
| Nonresident              |         | 1633                | 619     | 1046 | 104  | 1769  | 108.3%            | 3.0              | 5308           |                                          |
| 411 Uinta-Cedar Mountain | D/F     | 307                 | 0       | 211  | 51   | 262   | 85.3%             | 3.5              | 911            | 350                                      |
|                          | Limited | 479                 | 424     | 5    | 0    | 429   | 89.6%             | 3.9              | 1674           | 510                                      |
| Total Hunters            |         | 684                 | 424     | 216  | 51   | 691   | 101.0%            | 3.7              | 2585           |                                          |
| Resident                 |         | 473                 | 321     | 98   | 25   | 444   | 93.9%             | 4.2              | 1848           |                                          |
| Nonresident              |         | 211                 | 103     | 118  | 26   | 247   | 117.1%            | 3.0              | 737            |                                          |
| 412 South Rock Springs   | D/F     | 175                 | 0       | 144  | 17   | 161   | 92.0%             | 2.4              | 394            | 204                                      |
|                          | Limited | 336                 | 298     | 0    | 0    | 298   | 88.7%             | 3.2              | 939            | 354                                      |
| Total Hunters            |         | 434                 | 298     | 144  | 17   | 459   | 105.8%            | 2.9              | 1333           |                                          |
| Resident                 |         | 327                 | 237     | 86   | 8    | 331   | 101.2%            | 3.1              | 1027           |                                          |
| Nonresident              |         | 107                 | 61      | 58   | 9    | 128   | 119.6%            | 2.4              | 306            |                                          |
| 414 Bitter Creek         | D/F     | 28                  | 0       | 21   | 7    | 28    | 100.0%            | 4.7              | 132            | 28                                       |
|                          | Limited | 423                 | 347     | 0    | 0    | 347   | 82.0%             | 3.3              | 1129           | 454                                      |
| Total Hunters            |         | 440                 | 347     | 21   | 7    | 375   | 85.2%             | 3.4              | 1261           |                                          |
| Resident                 |         | 351                 | 263     | 13   | 7    | 283   | 80.6%             | 3.7              | 1045           |                                          |
| Nonresident              |         | 89                  | 84      | 8    | 0    | 92    | 103.4%            | 2.3              | 216            |                                          |
| 419 Carter Lease         | D/F     | 898                 | 0       | 667  | 104  | 771   | 85.9%             | 3.4              | 2616           | 1103                                     |
|                          | Limited | 714                 | 643     | 1    | 3    | 647   | 90.6%             | 3.4              | 2215           | 758                                      |
| Total Hunters            |         | 1454                | 643     | 668  | 107  | 1418  | 97.5%             | 3.4              | 4831           |                                          |
| Resident                 |         | 771                 | 494     | 181  | 36   | 711   | 92.2%             | 3.9              | 2747           |                                          |
| Nonresident              |         | 683                 | 149     | 487  | 71   | 707   | 103.5%            | 2.9              | 2084           |                                          |
| 438 Baggs                | D/F     | 621                 | 0       | 463  | 62   | 525   | 84.5%             | 3.0              | 1591           | 876                                      |
|                          | Limited | 662                 | 550     | 0    | 0    | 550   | 83.1%             | 3.9              | 2150           | 708                                      |
| Total Hunters            |         | 1162                | 550     | 463  | 62   | 1075  | 92.5%             | 3.5              | 3741           |                                          |
| Resident                 |         | 603                 | 440     | 69   | 2    | 511   | 84.7%             | 4.0              | 2035           |                                          |
| Nonresident              |         | 559                 | 110     | 394  | 60   | 564   | 100.9%            | 3.0              | 1706           |                                          |



TABLE I-H (Continued)

**ANTELOPE** HERD UNIT REPORT

| HERD              | TYPE    | ACTIVE<br>LICS/HTRS | HARVEST |      |      |       | HUNTER<br>SUCCESS | DAYS/<br>HARVEST | HUNTER<br>DAYS | LICENSES<br>SOLD<br>(cross hunt<br>incl) |
|-------------------|---------|---------------------|---------|------|------|-------|-------------------|------------------|----------------|------------------------------------------|
|                   |         |                     | BUCK    | DOE  | FAWN | TOTAL |                   |                  |                |                                          |
| 520 Chalk Bluffs  | D/F     | 168                 | 0       | 88   | 25   | 113   | 67.3%             | 3.5              | 390            | 200                                      |
|                   | Limited | 146                 | 118     | 0    | 7    | 125   | 85.6%             | 3.9              | 492            | 150                                      |
| Total Hunters     |         | 276                 | 118     | 88   | 32   | 238   | 86.2%             | 3.7              | 882            |                                          |
| Resident          |         | 170                 | 85      | 31   | 16   | 132   | 77.6%             | 4.3              | 570            |                                          |
| Nonresident       |         | 106                 | 33      | 57   | 16   | 106   | 100.0%            | 2.9              | 312            |                                          |
| 521 Hawk Springs  | D/F     | 503                 | 0       | 311  | 75   | 386   | 76.7%             | 3.9              | 1521           | 606                                      |
|                   | Limited | 684                 | 464     | 48   | 6    | 518   | 75.7%             | 4.1              | 2113           | 728                                      |
| Total Hunters     |         | 1053                | 464     | 359  | 81   | 904   | 85.8%             | 4.0              | 3634           |                                          |
| Resident          |         | 557                 | 267     | 156  | 36   | 459   | 82.4%             | 4.3              | 1966           |                                          |
| Nonresident       |         | 496                 | 197     | 203  | 45   | 445   | 89.7%             | 3.7              | 1668           |                                          |
| 522 Meadowdale    | D/F     | 404                 | 0       | 329  | 18   | 347   | 85.9%             | 3.9              | 1366           | 453                                      |
|                   | Limited | 423                 | 394     | 9    | 0    | 403   | 95.3%             | 3.2              | 1307           | 453                                      |
| Total Hunters     |         | 718                 | 394     | 338  | 18   | 750   | 104.5%            | 3.6              | 2673           |                                          |
| Resident          |         | 171                 | 108     | 73   | 5    | 186   | 108.8%            | 5.2              | 970            |                                          |
| Nonresident       |         | 547                 | 286     | 265  | 13   | 564   | 103.1%            | 3.0              | 1703           |                                          |
| 523 Iron Mountain | D/F     | 854                 | 0       | 640  | 56   | 696   | 81.5%             | 3.3              | 2295           | 924                                      |
|                   | Limited | 1161                | 922     | 35   | 10   | 967   | 83.3%             | 3.7              | 3617           | 1262                                     |
| Total Hunters     |         | 1698                | 922     | 675  | 66   | 1663  | 97.9%             | 3.6              | 5912           |                                          |
| Resident          |         | 649                 | 347     | 189  | 14   | 550   | 84.7%             | 4.5              | 2499           |                                          |
| Nonresident       |         | 1049                | 575     | 486  | 52   | 1113  | 106.1%            | 3.1              | 3413           |                                          |
| 524 Dwyer         | D/F     | 216                 | 0       | 168  | 21   | 189   | 87.5%             | 3.4              | 651            | 250                                      |
|                   | Limited | 343                 | 284     | 15   | 0    | 299   | 87.2%             | 3.0              | 901            | 363                                      |
| Total Hunters     |         | 486                 | 284     | 183  | 21   | 488   | 100.4%            | 3.2              | 1552           |                                          |
| Resident          |         | 242                 | 152     | 99   | 7    | 258   | 106.6%            | 3.4              | 867            |                                          |
| Nonresident       |         | 244                 | 132     | 84   | 14   | 230   | 94.3%             | 3.0              | 685            |                                          |
| 525 Medicine Bow  | D/F     | 4100                | 0       | 2902 | 557  | 3459  | 84.4%             | 3.5              | 11995          | 4712                                     |
|                   | Limited | 4406                | 3618    | 93   | 23   | 3734  | 84.7%             | 3.1              | 11529          | 4791                                     |
| Total Hunters     |         | 7655                | 3618    | 2995 | 580  | 7193  | 94.0%             | 3.3              | 23524          |                                          |
| Resident          |         | 2264                | 1372    | 484  | 56   | 1912  | 84.5%             | 3.3              | 6324           |                                          |
| Nonresident       |         | 5391                | 2246    | 2511 | 524  | 5281  | 98.0%             | 3.3              | 17200          |                                          |
| 526 Cooper Lake   | D/F     | 338                 | 0       | 206  | 48   | 254   | 75.1%             | 3.4              | 875            | 400                                      |
|                   | Limited | 382                 | 325     | 0    | 0    | 325   | 85.1%             | 3.5              | 1124           | 402                                      |
| Total Hunters     |         | 672                 | 325     | 206  | 48   | 579   | 86.2%             | 3.5              | 1999           |                                          |
| Resident          |         | 121                 | 54      | 18   | 5    | 77    | 63.6%             | 5.5              | 425            |                                          |
| Nonresident       |         | 551                 | 271     | 188  | 43   | 502   | 91.1%             | 3.1              | 1574           |                                          |
| 527 Centennial    | D/F     | 837                 | 0       | 554  | 65   | 619   | 74.0%             | 4.9              | 3062           | 973                                      |
|                   | Limited | 1072                | 882     | 22   | 15   | 919   | 85.7%             | 3.0              | 2782           | 1191                                     |
| Total Hunters     |         | 1697                | 882     | 576  | 80   | 1538  | 90.6%             | 3.8              | 5844           |                                          |
| Resident          |         | 622                 | 340     | 117  | 17   | 474   | 76.2%             | 4.5              | 2111           |                                          |
| Nonresident       |         | 1075                | 542     | 459  | 63   | 1064  | 99.0%             | 3.5              | 3733           |                                          |
| 528 Elk Mountain  | D/F     | 466                 | 0       | 363  | 41   | 404   | 86.7%             | 3.3              | 1342           | 500                                      |
|                   | Limited | 518                 | 451     | 0    | 0    | 451   | 87.1%             | 3.6              | 1624           | 557                                      |
| Total Hunters     |         | 908                 | 451     | 363  | 41   | 855   | 94.2%             | 3.5              | 2966           |                                          |
| Resident          |         | 162                 | 90      | 47   | 0    | 137   | 84.6%             | 4.0              | 551            |                                          |
| Nonresident       |         | 746                 | 361     | 316  | 41   | 718   | 96.2%             | 3.4              | 2415           |                                          |
| 529 Big Creek     | D/F     | 125                 | 0       | 101  | 8    | 109   | 87.2%             | 3.5              | 382            | 150                                      |
|                   | Limited | 96                  | 77      | 4    | 0    | 81    | 84.4%             | 4.1              | 329            | 104                                      |
| Total Hunters     |         | 185                 | 77      | 105  | 8    | 190   | 102.7%            | 3.7              | 711            |                                          |
| Resident          |         | 99                  | 58      | 33   | 0    | 91    | 91.9%             | 4.2              | 378            |                                          |
| Nonresident       |         | 86                  | 19      | 72   | 8    | 99    | 115.1%            | 3.4              | 333            |                                          |
| 615 Red Desert    | Limited | 470                 | 400     | 0    | 0    | 400   | 85.1%             | 3.6              | 1451           | 505                                      |
| Total Hunters     |         | 470                 | 400     | 0    | 0    | 400   | 85.1%             | 3.6              | 1451           |                                          |
| Resident          |         | 369                 | 299     | 0    | 0    | 299   | 81.0%             | 4.0              | 1183           |                                          |
| Nonresident       |         | 101                 | 101     | 0    | 0    | 101   | 100.0%            | 2.7              | 268            |                                          |

TABLE I-H (Continued)

**ANTELOPE** HERD UNIT REPORT

| HERD               | TYPE    | ACTIVE<br>LICS/HTRS | HARVEST |      |      |       | HUNTER<br>SUCCESS | DAYS/<br>HARVEST | HUNTER<br>DAYS | LICENSES<br>SOLD<br>(cross hunt<br>incl) |
|--------------------|---------|---------------------|---------|------|------|-------|-------------------|------------------|----------------|------------------------------------------|
|                    |         |                     | BUCK    | DOE  | FAWN | TOTAL |                   |                  |                |                                          |
| 630 Iron Springs   | D/F     | 237                 | 0       | 191  | 28   | 219   | 92.4%             | 3.0              | 657            | 303                                      |
|                    | Limited | 743                 | 653     | 0    | 0    | 653   | 87.9%             | 3.0              | 1931           | 811                                      |
| Total Hunters      |         | 906                 | 653     | 191  | 28   | 872   | 96.2%             | 3.0              | 2588           |                                          |
| Resident           |         | 356                 | 290     | 36   | 0    | 326   | 91.6%             | 2.8              | 922            |                                          |
| Nonresident        |         | 550                 | 363     | 155  | 28   | 546   | 99.3%             | 3.1              | 1666           |                                          |
| 631 Wind River     | D/F     | 23                  | 0       | 18   | 1    | 19    | 82.6%             | 4.8              | 91             | 25                                       |
|                    | Limited | 32                  | 23      | 3    | 0    | 26    | 81.3%             | 3.9              | 101            | 36                                       |
| Total Hunters      |         | 38                  | 23      | 21   | 1    | 45    | 118.4%            | 4.3              | 192            |                                          |
| Resident           |         | 29                  | 16      | 17   | 0    | 33    | 113.8%            | 4.9              | 163            |                                          |
| Nonresident        |         | 9                   | 7       | 4    | 1    | 12    | 133.3%            | 2.4              | 29             |                                          |
| 632 Beaver Rim     | D/F     | 945                 | 0       | 724  | 61   | 785   | 83.1%             | 3.4              | 2686           | 1123                                     |
|                    | Limited | 1402                | 1212    | 10   | 6    | 1228  | 87.6%             | 3.4              | 4146           | 1481                                     |
| Total Hunters      |         | 2051                | 1212    | 734  | 67   | 2013  | 98.1%             | 3.4              | 6832           |                                          |
| Resident           |         | 1387                | 896     | 368  | 38   | 1302  | 93.9%             | 3.4              | 4483           |                                          |
| Nonresident        |         | 664                 | 316     | 366  | 29   | 711   | 107.1%            | 3.3              | 2349           |                                          |
| 634 Badwater       | D/F     | 251                 | 0       | 208  | 14   | 222   | 88.4%             | 3.2              | 714            | 273                                      |
|                    | Limited | 382                 | 331     | 0    | 0    | 331   | 86.6%             | 3.2              | 1049           | 404                                      |
| Total Hunters      |         | 578                 | 331     | 208  | 14   | 553   | 95.7%             | 3.2              | 1763           |                                          |
| Resident           |         | 437                 | 261     | 137  | 14   | 412   | 94.3%             | 3.1              | 1283           |                                          |
| Nonresident        |         | 141                 | 70      | 71   | 0    | 141   | 100.0%            | 3.4              | 480            |                                          |
| 635 Project        | D/F     | 128                 | 0       | 113  | 7    | 120   | 93.8%             | 2.7              | 321            | 131                                      |
|                    | Limited | 117                 | 105     | 2    | 0    | 107   | 91.5%             | 3.0              | 324            | 126                                      |
| Total Hunters      |         | 179                 | 105     | 115  | 7    | 227   | 126.8%            | 2.8              | 645            |                                          |
| Resident           |         | 134                 | 82      | 89   | 2    | 173   | 129.1%            | 2.8              | 492            |                                          |
| Nonresident        |         | 45                  | 23      | 26   | 5    | 54    | 120.0%            | 2.8              | 153            |                                          |
| 636 North Ferris   | D/F     | 120                 | 0       | 102  | 5    | 107   | 89.2%             | 3.0              | 324            | 150                                      |
|                    | Limited | 385                 | 310     | 6    | 0    | 316   | 82.1%             | 2.6              | 808            | 404                                      |
| Total Hunters      |         | 471                 | 310     | 108  | 5    | 423   | 89.8%             | 2.7              | 1132           |                                          |
| Resident           |         | 329                 | 226     | 42   | 0    | 268   | 81.5%             | 2.4              | 646            |                                          |
| Nonresident        |         | 142                 | 84      | 66   | 5    | 155   | 109.2%            | 3.1              | 486            |                                          |
| 637 South Ferris   | Limited | 359                 | 305     | 0    | 0    | 305   | 85.0%             | 3.6              | 1088           | 407                                      |
| Total Hunters      |         | 359                 | 305     | 0    | 0    | 305   | 85.0%             | 3.6              | 1088           |                                          |
| Resident           |         | 274                 | 226     | 0    | 0    | 226   | 82.5%             | 3.8              | 850            |                                          |
| Nonresident        |         | 85                  | 79      | 0    | 0    | 79    | 92.9%             | 3.0              | 238            |                                          |
| 740 Cheyenne River | D/F     | 2465                | 0       | 1941 | 227  | 2168  | 88.0%             | 3.5              | 7678           | 2610                                     |
|                    | Limited | 4103                | 3691    | 58   | 0    | 3749  | 91.4%             | 3.1              | 11472          | 4239                                     |
| Total Hunters      |         | 5915                | 3691    | 1999 | 227  | 5917  | 100.0%            | 3.2              | 19150          |                                          |
| Resident           |         | 1246                | 849     | 289  | 8    | 1146  | 92.0%             | 3.7              | 4284           |                                          |
| Nonresident        |         | 4669                | 2842    | 1710 | 219  | 4771  | 102.2%            | 3.1              | 14866          |                                          |
| 745 Rattlesnake    | D/F     | 870                 | 0       | 676  | 131  | 807   | 92.8%             | 3.0              | 2450           | 951                                      |
|                    | Limited | 1295                | 1207    | 0    | 0    | 1207  | 93.2%             | 2.6              | 3162           | 1410                                     |
| Total Hunters      |         | 1923                | 1207    | 676  | 131  | 2014  | 104.7%            | 2.8              | 5612           |                                          |
| Resident           |         | 916                 | 632     | 221  | 53   | 906   | 98.9%             | 2.9              | 2636           |                                          |
| Nonresident        |         | 1007                | 575     | 455  | 78   | 1108  | 110.0%            | 2.7              | 2976           |                                          |
| 746 North Natrona  | D/F     | 347                 | 0       | 269  | 33   | 302   | 87.0%             | 3.1              | 945            | 451                                      |
|                    | Limited | 698                 | 615     | 28   | 0    | 643   | 92.1%             | 2.5              | 1612           | 809                                      |
| Total Hunters      |         | 1008                | 615     | 297  | 33   | 945   | 93.8%             | 2.7              | 2557           |                                          |
| Resident           |         | 664                 | 460     | 140  | 11   | 611   | 92.0%             | 2.5              | 1535           |                                          |
| Nonresident        |         | 344                 | 155     | 157  | 22   | 334   | 97.1%             | 3.1              | 1022           |                                          |
| 748 North Converse | D/F     | 827                 | 0       | 662  | 84   | 746   | 90.2%             | 3.3              | 2468           | 942                                      |
|                    | Limited | 1625                | 1486    | 46   | 0    | 1532  | 94.3%             | 2.8              | 4223           | 1748                                     |
| Total Hunters      |         | 2183                | 1486    | 708  | 84   | 2278  | 104.4%            | 2.9              | 6691           |                                          |
| Resident           |         | 405                 | 265     | 88   | 19   | 372   | 91.9%             | 4.0              | 1488           |                                          |
| Nonresident        |         | 1778                | 1221    | 620  | 65   | 1906  | 107.2%            | 2.7              | 5203           |                                          |

TABLE III  
CONFIDENCE INTERVALS FOR TOTAL ANTELOPE HARVEST  
BY HERD UNIT  
2007

| HERD                     | TOTAL HARVEST | 90% CONFIDENCE LIMITS |   |      |
|--------------------------|---------------|-----------------------|---|------|
| 202 Bighorn              | 16            | 11                    | - | 21   |
| 203 Copper Mountain      | 352           | 341                   | - | 363  |
| 204 Fifteenmile          | 280           | 272                   | - | 288  |
| 205 Carter Mountain      | 264           | 255                   | - | 273  |
| 207 Badger Basin         | 176           | 170                   | - | 182  |
| 308 Clearmont            | 679           | 658                   | - | 700  |
| 309 Pumpkin Buttes       | 2374          | 2352                  | - | 2396 |
| 310 Upper Powder River   | 666           | 647                   | - | 685  |
| 316 Highlight            | 1056          | 1044                  | - | 1068 |
| 318 Crazy Woman          | 1304          | 1290                  | - | 1318 |
| 339 North Black Hills    | 1919          | 1892                  | - | 1946 |
| 351 Gillette             | 1481          | 1467                  | - | 1495 |
| 352 Middle Fork          | 661           | 645                   | - | 677  |
| 353 Ucross               | 701           | 686                   | - | 716  |
| 354 Buffalo              | 598           | 583                   | - | 613  |
| 355 Beckton              | 248           | 235                   | - | 261  |
| 401 Sublette             | 4700          | 4661                  | - | 4739 |
| 411 Uinta-Cedar Mountain | 691           | 676                   | - | 706  |
| 412 South Rock Springs   | 459           | 448                   | - | 470  |
| 414 Bitter Creek         | 375           | 362                   | - | 388  |
| 419 Carter Lease         | 1418          | 1396                  | - | 1440 |
| 438 Baggs                | 1075          | 1053                  | - | 1097 |
| 520 Chalk Bluffs         | 238           | 225                   | - | 251  |
| 521 Hawk Springs         | 904           | 880                   | - | 928  |
| 522 Meadowdale           | 750           | 736                   | - | 764  |
| 523 Iron Mountain        | 1663          | 1635                  | - | 1691 |
| 524 Dwyer                | 488           | 475                   | - | 501  |
| 525 Medicine Bow         | 7193          | 7138                  | - | 7248 |
| 526 Cooper Lake          | 579           | 561                   | - | 597  |
| 527 Centennial           | 1538          | 1510                  | - | 1566 |
| 528 Elk Mountain         | 855           | 838                   | - | 872  |
| 529 Big Creek            | 190           | 181                   | - | 199  |
| 615 Red Desert           | 400           | 387                   | - | 413  |
| 630 Iron Springs         | 872           | 856                   | - | 888  |
| 631 Wind River           | 45            | 40                    | - | 50   |
| 632 Beaver Rim           | 2013          | 1985                  | - | 2041 |
| 634 Badwater             | 553           | 539                   | - | 567  |
| 635 Project              | 227           | 220                   | - | 234  |
| 636 North Ferris         | 423           | 409                   | - | 437  |
| 637 South Ferris         | 305           | 294                   | - | 316  |
| 740 Cheyenne River       | 5917          | 5877                  | - | 5957 |
| 745 Rattlesnake          | 2014          | 1995                  | - | 2033 |
| 746 North Natrona        | 945           | 929                   | - | 961  |
| 748 North Converse       | 2278          | 2256                  | - | 2300 |

TABLE IV  
**ANTELOPE HUNTERS HUNTING ON OPENING DAY**  
**BY HUNT AREA AND RESIDENCY**  
**2007**

| HUNT<br>AREA | RESIDENT HUNTERS<br>HUNTING ON<br>OPENING DAY | PERCENT WHO<br>HUNTED ON<br>OPENING DAY | NONRESIDENT<br>HUNTERS HUNTING<br>ON OPENING DAY | PERCENT WHO<br>HUNTED ON<br>OPENING DAY |
|--------------|-----------------------------------------------|-----------------------------------------|--------------------------------------------------|-----------------------------------------|
| 1            | 8                                             | 19.2%                                   | 73                                               | 25.3%                                   |
| 2            | 9                                             | 10.8%                                   | 92                                               | 22.8%                                   |
| 3            | 22                                            | 25.9%                                   | 78                                               | 37.5%                                   |
| 4            | 52                                            | 73.2%                                   | 83                                               | 40.7%                                   |
| 5            | 56                                            | 32.5%                                   | 82                                               | 33.2%                                   |
| 6            | 43                                            | 54.7%                                   | 130                                              | 39.0%                                   |
| 7            | 143                                           | 54.1%                                   | 251                                              | 26.1%                                   |
| 8            | 12                                            | 61.8%                                   | 40                                               | 14.0%                                   |
| 9            | 38                                            | 36.4%                                   | 158                                              | 21.0%                                   |
| 10           | 17                                            | 25.5%                                   | 66                                               | 43.0%                                   |
| 11           | 45                                            | 34.7%                                   | 49                                               | 15.7%                                   |
| 12           | 14                                            | 32.7%                                   | 66                                               | 27.7%                                   |
| 15           | 61                                            | 28.2%                                   | 128                                              | 22.5%                                   |
| 16           | 33                                            | 34.5%                                   | 77                                               | 23.8%                                   |
| 17           | 201                                           | 44.1%                                   | 186                                              | 19.5%                                   |
| 18           | 0                                             | 0.0%                                    | 90                                               | 28.1%                                   |
| 19           | 62                                            | 45.0%                                   | 108                                              | 28.9%                                   |
| 20           | 46                                            | 40.4%                                   | 113                                              | 17.5%                                   |
| 21           | 28                                            | 42.4%                                   | 165                                              | 25.0%                                   |
| 22           | 70                                            | 62.0%                                   | 240                                              | 38.4%                                   |
| 23           | 156                                           | 41.3%                                   | 506                                              | 24.7%                                   |
| 24           | 73                                            | 29.6%                                   | 291                                              | 37.3%                                   |
| 25           | 112                                           | 42.2%                                   | 119                                              | 27.9%                                   |
| 26           | 0                                             | 0.0%                                    | 287                                              | 27.1%                                   |
| 27           | 161                                           | 49.3%                                   | 79                                               | 29.0%                                   |
| 28           | 22                                            | 66.7%                                   | 102                                              | 33.8%                                   |
| 29           | 103                                           | 40.5%                                   | 383                                              | 23.1%                                   |
| 30           | 101                                           | 41.8%                                   | 188                                              | 24.1%                                   |
| 31           | 58                                            | 42.5%                                   | 103                                              | 21.8%                                   |
| 32           | 59                                            | 27.5%                                   | 239                                              | 25.3%                                   |
| 34           | 65                                            | 31.0%                                   | 47                                               | 33.9%                                   |
| 35           | 72                                            | 47.8%                                   | 67                                               | 26.6%                                   |
| 36           | 85                                            | 43.1%                                   | 60                                               | 49.6%                                   |
| 37           | 84                                            | 49.5%                                   | 53                                               | 49.3%                                   |
| 38           | 74                                            | 27.4%                                   | 94                                               | 18.3%                                   |
| 39           | 60                                            | 42.6%                                   | 57                                               | 27.2%                                   |
| 40           | 41                                            | 46.9%                                   | 84                                               | 39.6%                                   |
| 41           | 13                                            | 46.7%                                   | 20                                               | 43.0%                                   |
| 42           | 52                                            | 36.5%                                   | 152                                              | 19.8%                                   |
| 43           | 29                                            | 24.2%                                   | 125                                              | 22.6%                                   |
| 44           | 55                                            | 43.6%                                   | 71                                               | 24.2%                                   |
| 45           | 91                                            | 27.8%                                   | 198                                              | 29.5%                                   |
| 46           | 105                                           | 47.8%                                   | 180                                              | 31.6%                                   |
| 47           | 407                                           | 41.6%                                   | 307                                              | 26.4%                                   |
| 48           | 148                                           | 48.9%                                   | 157                                              | 22.6%                                   |
| 50           | 36                                            | 22.2%                                   | 131                                              | 17.5%                                   |
| 51           | 40                                            | 40.2%                                   | 20                                               | 23.6%                                   |
| 52           | 138                                           | 52.4%                                   | 102                                              | 27.4%                                   |
| 53           | 168                                           | 34.4%                                   | 116                                              | 23.6%                                   |
| 55           | 29                                            | 25.0%                                   | 19                                               | 28.6%                                   |
| 56           | 20                                            | 80.0%                                   | 38                                               | 25.0%                                   |
| 57           | 82                                            | 34.1%                                   | 20                                               | 33.1%                                   |
| 58           | 62                                            | 55.9%                                   | 11                                               | 35.7%                                   |
| 59           | 93                                            | 48.7%                                   | 28                                               | 42.9%                                   |
| 60           | 21                                            | 25.8%                                   | 5                                                | 28.6%                                   |
| 61           | 44                                            | 41.9%                                   | 12                                               | 38.9%                                   |
| 62           | 89                                            | 32.5%                                   | 23                                               | 26.7%                                   |
| 63           | 197                                           | 59.8%                                   | 19                                               | 13.6%                                   |
| 64           | 47                                            | 25.5%                                   | 16                                               | 30.8%                                   |
| 65           | 80                                            | 27.9%                                   | 27                                               | 18.0%                                   |

TABLE IV (Continued)

**ANTELOPE** OPENING DAY HUNTERS REPORT

| HUNT<br>AREA | RESIDENT<br>HUNTERS | PERCENT WHO<br>HUNTED ON<br>OPENING DAY | NONRESIDENT<br>HUNTERS | PERCENT WHO<br>HUNTED ON<br>OPENING DAY |
|--------------|---------------------|-----------------------------------------|------------------------|-----------------------------------------|
| 66           | 48                  | 55.3%                                   | 10                     | 30.4%                                   |
| 67           | 89                  | 44.8%                                   | 28                     | 37.7%                                   |
| 68           | 115                 | 45.3%                                   | 64                     | 34.7%                                   |
| 69           | 47                  | 53.7%                                   | 5                      | 13.6%                                   |
| 70           | 71                  | 72.6%                                   | 77                     | 29.3%                                   |
| 71           | 130                 | 56.8%                                   | 103                    | 46.7%                                   |
| 72           | 221                 | 37.5%                                   | 129                    | 24.3%                                   |
| 73           | 334                 | 50.2%                                   | 84                     | 24.5%                                   |
| 74           | 88                  | 39.6%                                   | 18                     | 28.3%                                   |
| 75           | 201                 | 46.1%                                   | 36                     | 25.7%                                   |
| 76           | 22                  | 28.4%                                   | 14                     | 60.0%                                   |
| 77           | 18                  | 26.3%                                   | 8                      | 36.4%                                   |
| 78           | 18                  | 25.0%                                   | 7                      | 39.3%                                   |
| 79           | 0                   | 0.0%                                    | 0                      | 0.0%                                    |
| 80           | 62                  | 46.5%                                   | 13                     | 38.2%                                   |
| 81           | 19                  | 34.4%                                   | 10                     | 59.5%                                   |
| 82           | 34                  | 46.9%                                   | 12                     | 58.0%                                   |
| 83           | 34                  | 42.4%                                   | 14                     | 62.2%                                   |
| 84           | 7                   | 25.1%                                   | 3                      | 28.2%                                   |
| 85           | 3                   | 25.0%                                   | 0                      | 0.0%                                    |
| 86           | 9                   | 31.1%                                   | 12                     | 89.6%                                   |
| 87           | 155                 | 39.7%                                   | 96                     | 33.7%                                   |
| 88           | 123                 | 49.4%                                   | 71                     | 42.3%                                   |
| 89           | 170                 | 52.3%                                   | 26                     | 28.9%                                   |
| 90           | 189                 | 57.5%                                   | 70                     | 30.7%                                   |
| 91           | 185                 | 51.8%                                   | 31                     | 28.2%                                   |
| 92           | 78                  | 28.6%                                   | 15                     | 18.1%                                   |
| 93           | 287                 | 39.3%                                   | 130                    | 29.6%                                   |
| 94           | 176                 | 34.2%                                   | 68                     | 23.3%                                   |
| 95           | 110                 | 42.4%                                   | 24                     | 30.7%                                   |
| 96           | 83                  | 34.9%                                   | 22                     | 21.6%                                   |
| 97           | 77                  | 60.7%                                   | 19                     | 51.0%                                   |
| 98           | 27                  | 18.6%                                   | 74                     | 34.0%                                   |
| 99           | 68                  | 31.6%                                   | 47                     | 35.0%                                   |
| 100          | 45                  | 41.3%                                   | 46                     | 26.2%                                   |
| 102          | 51                  | 29.3%                                   | 104                    | 22.0%                                   |
| 103          | 88                  | 36.3%                                   | 45                     | 18.3%                                   |
| 104          | 37                  | 24.8%                                   | 43                     | 33.8%                                   |
| 106          | 111                 | 44.6%                                   | 42                     | 30.5%                                   |
| 107          | 54                  | 29.4%                                   | 24                     | 19.5%                                   |
| 108          | 22                  | 32.1%                                   | 4                      | 14.3%                                   |
| 109          | 18                  | 18.8%                                   | 34                     | 18.2%                                   |
| 110          | 36                  | 59.8%                                   | 8                      | 49.2%                                   |
| 111          | 59                  | 34.7%                                   | 31                     | 28.9%                                   |
| 112          | 59                  | 43.3%                                   | 9                      | 21.9%                                   |
| 113          | 45                  | 44.6%                                   | 74                     | 22.0%                                   |
| 114          | 15                  | 29.9%                                   | 14                     | 67.0%                                   |
| 115          | 54                  | 59.3%                                   | 34                     | 34.5%                                   |
| 116          | 0                   | 0.0%                                    | 0                      | 0.0%                                    |
| 117          | 4                   | 39.3%                                   | 3                      | 34.8%                                   |

TABLE VII  
ANTELOPE LICENSE DATA SUMMARY  
2007

| HUNT<br>AREA | LICENSE<br>TYPE | NUMBER<br>SOLD | NUMBER<br>SURVEYED | NUMBER<br>USABLE SURVEYS<br>(both hunters and nonhunters) | % USABLE<br>RESPONSE |
|--------------|-----------------|----------------|--------------------|-----------------------------------------------------------|----------------------|
| 1            | 1               | 289            | 116                | 71                                                        | 61.2%                |
| 1            | 6               | 119            | 106                | 40                                                        | 37.7%                |
| 2            | 1               | 351            | 116                | 68                                                        | 58.6%                |
| 2            | 6               | 239            | 116                | 68                                                        | 58.6%                |
| 3            | 1               | 237            | 118                | 68                                                        | 57.6%                |
| 3            | 6               | 167            | 116                | 56                                                        | 48.3%                |
| 4            | 1               | 229            | 114                | 56                                                        | 49.1%                |
| 4            | 6               | 135            | 110                | 48                                                        | 43.6%                |
| 5            | 1               | 302            | 110                | 59                                                        | 53.6%                |
| 5            | 6               | 213            | 116                | 71                                                        | 61.2%                |
| 6            | 1               | 339            | 114                | 79                                                        | 69.3%                |
| 6            | 6               | 134            | 94                 | 53                                                        | 56.4%                |
| 7            | 1               | 859            | 126                | 74                                                        | 58.7%                |
| 7            | 6               | 559            | 124                | 73                                                        | 58.9%                |
| 8            | 1               | 301            | 110                | 67                                                        | 60.9%                |
| 8            | 6               | 50             | 50                 | 22                                                        | 44.0%                |
| 9            | 1               | 552            | 120                | 72                                                        | 60.0%                |
| 9            | 6               | 400            | 116                | 74                                                        | 63.8%                |
| 10           | 1               | 185            | 114                | 67                                                        | 58.8%                |
| 10           | 6               | 179            | 120                | 63                                                        | 52.5%                |
| 11           | 1               | 252            | 106                | 62                                                        | 58.5%                |
| 11           | 6               | 300            | 110                | 56                                                        | 50.9%                |
| 12           | 1               | 201            | 102                | 60                                                        | 58.8%                |
| 12           | 6               | 153            | 106                | 54                                                        | 50.9%                |
| 15           | 1               | 589            | 124                | 67                                                        | 54.0%                |
| 15           | 6               | 423            | 124                | 46                                                        | 37.1%                |
| 16           | 1               | 382            | 120                | 74                                                        | 61.7%                |
| 16           | 6               | 128            | 116                | 42                                                        | 36.2%                |
| 17           | 1               | 1049           | 128                | 73                                                        | 57.0%                |
| 17, 18, 19   | 6               | 902            | 192                | 75                                                        | 39.1%                |
| 18           | 1               | 330            | 120                | 69                                                        | 57.5%                |
| 19           | 1               | 391            | 124                | 60                                                        | 48.4%                |
| 20           | 1               | 538            | 124                | 69                                                        | 55.7%                |
| 20           | 6               | 380            | 122                | 51                                                        | 41.8%                |
| 21           | 1               | 457            | 122                | 68                                                        | 55.7%                |
| 21           | 6               | 361            | 122                | 47                                                        | 38.5%                |
| 22           | 1               | 528            | 124                | 68                                                        | 54.8%                |
| 22           | 6               | 371            | 122                | 55                                                        | 45.1%                |
| 23           | 1               | 1648           | 130                | 75                                                        | 57.7%                |
| 23           | 6               | 993            | 128                | 66                                                        | 51.6%                |
| 24           | 1               | 707            | 124                | 62                                                        | 50.0%                |
| 24           | 6               | 581            | 124                | 63                                                        | 50.8%                |
| 25           | 1               | 581            | 122                | 71                                                        | 58.2%                |
| 25           | 6               | 256            | 116                | 41                                                        | 35.3%                |
| 26           | 1               | 926            | 128                | 69                                                        | 53.9%                |
| 26           | 6               | 481            | 120                | 68                                                        | 56.7%                |
| 27           | 1               | 453            | 118                | 66                                                        | 55.9%                |
| 27           | 6               | 256            | 118                | 62                                                        | 52.5%                |
| 28           | 1               | 241            | 116                | 54                                                        | 46.6%                |
| 28           | 6               | 205            | 75                 | 38                                                        | 50.7%                |
| 29           | 1               | 1204           | 128                | 76                                                        | 59.4%                |
| 29           | 6               | 786            | 124                | 60                                                        | 48.4%                |
| 29           | 7               | 77             | 69                 | 25                                                        | 36.2%                |
| 30           | 1               | 603            | 122                | 65                                                        | 53.3%                |
| 30           | 6               | 596            | 124                | 58                                                        | 46.8%                |
| 31           | 1               | 402            | 116                | 74                                                        | 63.8%                |
| 31           | 6               | 448            | 118                | 74                                                        | 62.7%                |
| 32           | 1               | 454            | 118                | 74                                                        | 62.7%                |
| 32           | 2               | 252            | 106                | 74                                                        | 69.8%                |
| 32           | 6               | 650            | 122                | 81                                                        | 66.4%                |
| 34           | 1               | 226            | 104                | 59                                                        | 56.7%                |
| 34           | 6               | 200            | 102                | 51                                                        | 50.0%                |
| 35           | 1               | 301            | 110                | 58                                                        | 52.7%                |
| 35           | 6               | 207            | 105                | 51                                                        | 48.6%                |

TABLE VII (Continued)

**ANTELOPE** LICENSE DATA SUMMARY

| HUNT<br>AREA | LICENSE<br>TYPE | NUMBER<br>SOLD | NUMBER<br>SURVEYED | NUMBER<br>USABLE SURVEYS<br>(both hunters and nonhunters) | % USABLE<br>RESPONSE |
|--------------|-----------------|----------------|--------------------|-----------------------------------------------------------|----------------------|
| 36           | 1               | 201            | 102                | 49                                                        | 48.0%                |
| 36           | 6               | 199            | 102                | 46                                                        | 45.1%                |
| 37           | 1               | 276            | 108                | 59                                                        | 54.6%                |
| 37           | 6               | 75             | 72                 | 47                                                        | 65.3%                |
| 38           | 1               | 551            | 120                | 55                                                        | 45.8%                |
| 38           | 6               | 446            | 120                | 60                                                        | 50.0%                |
| 39           | 1               | 300            | 110                | 55                                                        | 50.0%                |
| 39           | 6               | 100            | 80                 | 40                                                        | 50.0%                |
| 40           | 1               | 207            | 102                | 56                                                        | 54.9%                |
| 40           | 6               | 203            | 102                | 55                                                        | 53.9%                |
| 41           | 1               | 58             | 58                 | 28                                                        | 48.3%                |
| 41           | 6               | 50             | 51                 | 23                                                        | 45.1%                |
| 42           | 1               | 650            | 122                | 75                                                        | 61.5%                |
| 42           | 6               | 300            | 110                | 79                                                        | 71.8%                |
| 42           | 7               | 200            | 102                | 54                                                        | 52.9%                |
| 43           | 1               | 402            | 116                | 63                                                        | 54.3%                |
| 43           | 6               | 400            | 116                | 58                                                        | 50.0%                |
| 44           | 1               | 258            | 108                | 57                                                        | 52.8%                |
| 44           | 6               | 298            | 110                | 68                                                        | 61.8%                |
| 45           | 1               | 657            | 122                | 66                                                        | 54.1%                |
| 45           | 6               | 600            | 122                | 73                                                        | 59.8%                |
| 46           | 1               | 504            | 120                | 73                                                        | 60.8%                |
| 46           | 6               | 311            | 112                | 69                                                        | 61.6%                |
| 46           | 7               | 200            | 102                | 48                                                        | 47.1%                |
| 47           | 1               | 1006           | 126                | 74                                                        | 58.7%                |
| 47           | 2               | 350            | 114                | 78                                                        | 68.4%                |
| 47           | 6               | 706            | 124                | 64                                                        | 51.6%                |
| 47           | 7               | 400            | 116                | 74                                                        | 63.8%                |
| 48           | 1               | 356            | 114                | 65                                                        | 57.0%                |
| 48           | 2               | 156            | 94                 | 66                                                        | 70.2%                |
| 48           | 6               | 375            | 114                | 67                                                        | 58.8%                |
| 48           | 7               | 476            | 118                | 63                                                        | 53.4%                |
| 50           | 1               | 506            | 120                | 72                                                        | 60.0%                |
| 50           | 6               | 500            | 120                | 73                                                        | 60.8%                |
| 50           | 8               | 51             | 51                 | 37                                                        | 72.6%                |
| 51           | 1               | 104            | 82                 | 50                                                        | 61.0%                |
| 51           | 6               | 150            | 94                 | 55                                                        | 58.5%                |
| 52           | 1               | 254            | 106                | 64                                                        | 60.4%                |
| 52           | 2               | 250            | 106                | 69                                                        | 65.1%                |
| 52           | 6               | 202            | 102                | 71                                                        | 69.6%                |
| 52           | 7               | 101            | 82                 | 50                                                        | 61.0%                |
| 53           | 1               | 556            | 120                | 73                                                        | 60.8%                |
| 53           | 6               | 751            | 124                | 86                                                        | 69.4%                |
| 53           | 7               | 25             | 24                 | 12                                                        | 50.0%                |
| 55           | 1               | 152            | 94                 | 43                                                        | 45.7%                |
| 55           | 6               | 100            | 80                 | 46                                                        | 57.5%                |
| 56           | 1               | 201            | 102                | 60                                                        | 58.8%                |
| 57           | 1               | 302            | 110                | 66                                                        | 60.0%                |
| 57           | 6               | 28             | 28                 | 18                                                        | 64.3%                |
| 58           | 1               | 152            | 94                 | 52                                                        | 55.3%                |
| 59           | 1               | 177            | 98                 | 45                                                        | 45.9%                |
| 59           | 6               | 128            | 89                 | 47                                                        | 52.8%                |
| 60           | 1               | 100            | 82                 | 46                                                        | 56.1%                |
| 61           | 1               | 154            | 94                 | 55                                                        | 58.5%                |
| 62           | 1               | 407            | 116                | 62                                                        | 53.5%                |
| 63           | 1               | 404            | 116                | 68                                                        | 58.6%                |
| 63           | 6               | 150            | 94                 | 61                                                        | 64.9%                |
| 64           | 1               | 251            | 106                | 68                                                        | 64.2%                |
| 65           | 1               | 273            | 108                | 55                                                        | 50.9%                |
| 65           | 6               | 252            | 106                | 58                                                        | 54.7%                |
| 66           | 1               | 83             | 72                 | 40                                                        | 55.6%                |
| 66           | 6               | 74             | 72                 | 35                                                        | 48.6%                |
| 67           | 1               | 222            | 102                | 69                                                        | 67.7%                |
| 67           | 6               | 125            | 88                 | 41                                                        | 46.6%                |
| 68           | 1               | 326            | 110                | 65                                                        | 59.1%                |
| 68           | 6               | 243            | 106                | 66                                                        | 62.3%                |

TABLE VII (Continued)

**ANTELOPE** LICENSE DATA SUMMARY

| HUNT<br>AREA | LICENSE<br>TYPE | NUMBER<br>SOLD | NUMBER<br>SURVEYED | NUMBER<br>USABLE SURVEYS<br>(both hunters and nonhunters) | % USABLE<br>RESPONSE |
|--------------|-----------------|----------------|--------------------|-----------------------------------------------------------|----------------------|
| 69           | 1               | 101            | 82                 | 38                                                        | 46.3%                |
| 69           | 6               | 56             | 54                 | 24                                                        | 44.4%                |
| 70           | 1               | 201            | 102                | 65                                                        | 63.7%                |
| 70           | 6               | 300            | 110                | 65                                                        | 59.1%                |
| 71           | 1               | 303            | 110                | 61                                                        | 55.5%                |
| 71           | 6               | 199            | 102                | 50                                                        | 49.0%                |
| 72           | 1               | 906            | 126                | 77                                                        | 61.1%                |
| 72           | 6               | 452            | 118                | 45                                                        | 38.1%                |
| 73           | 1               | 504            | 120                | 58                                                        | 48.3%                |
| 73           | 2               | 305            | 110                | 54                                                        | 49.1%                |
| 73           | 6               | 399            | 117                | 65                                                        | 55.6%                |
| 73           | 7               | 52             | 52                 | 26                                                        | 50.0%                |
| 74           | 1               | 202            | 102                | 46                                                        | 45.1%                |
| 74           | 6               | 173            | 98                 | 46                                                        | 46.9%                |
| 75           | 1               | 404            | 116                | 73                                                        | 62.9%                |
| 75           | 6               | 273            | 108                | 46                                                        | 42.6%                |
| 76           | 1               | 100            | 80                 | 45                                                        | 56.3%                |
| 76           | 6               | 36             | 36                 | 26                                                        | 72.2%                |
| 77           | 1               | 54             | 54                 | 35                                                        | 64.8%                |
| 77           | 6               | 31             | 32                 | 15                                                        | 46.9%                |
| 77           | 7               | 25             | 25                 | 9                                                         | 36.0%                |
| 78           | 1               | 50             | 50                 | 38                                                        | 76.0%                |
| 78           | 6               | 51             | 51                 | 24                                                        | 47.1%                |
| 78           | 7               | 35             | 35                 | 15                                                        | 42.9%                |
| 79, 116      | 9               | 30             | 30                 | 18                                                        | 60.0%                |
| 80           | 1               | 106            | 82                 | 39                                                        | 47.6%                |
| 80           | 6               | 101            | 82                 | 46                                                        | 56.1%                |
| 81           | 1               | 25             | 25                 | 15                                                        | 60.0%                |
| 81           | 2               | 51             | 51                 | 29                                                        | 56.9%                |
| 82           | 1               | 80             | 74                 | 45                                                        | 60.8%                |
| 82           | 6               | 35             | 35                 | 16                                                        | 45.7%                |
| 83           | 1               | 78             | 72                 | 38                                                        | 52.8%                |
| 83           | 6               | 50             | 49                 | 20                                                        | 40.8%                |
| 84           | 1               | 36             | 36                 | 25                                                        | 69.4%                |
| 84           | 6               | 25             | 25                 | 15                                                        | 60.0%                |
| 85           | 1               | 16             | 16                 | 12                                                        | 75.0%                |
| 86           | 1               | 34             | 34                 | 13                                                        | 38.2%                |
| 86           | 6               | 25             | 25                 | 13                                                        | 52.0%                |
| 87           | 1               | 203            | 102                | 57                                                        | 55.9%                |
| 87           | 2               | 152            | 94                 | 52                                                        | 55.3%                |
| 87           | 6               | 250            | 106                | 64                                                        | 60.4%                |
| 87           | 7               | 250            | 106                | 68                                                        | 64.2%                |
| 88           | 1               | 254            | 106                | 56                                                        | 52.8%                |
| 88           | 6               | 275            | 108                | 69                                                        | 63.9%                |
| 89           | 1               | 252            | 106                | 61                                                        | 57.6%                |
| 89           | 6               | 176            | 98                 | 58                                                        | 59.2%                |
| 89           | 7               | 79             | 75                 | 27                                                        | 36.0%                |
| 90           | 1               | 207            | 102                | 57                                                        | 55.9%                |
| 90           | 2               | 202            | 102                | 60                                                        | 58.8%                |
| 90           | 6               | 175            | 98                 | 62                                                        | 63.3%                |
| 90           | 7               | 175            | 98                 | 75                                                        | 76.5%                |
| 91           | 1               | 403            | 116                | 72                                                        | 62.1%                |
| 91           | 6               | 127            | 88                 | 48                                                        | 54.6%                |
| 91           | 7               | 25             | 25                 | 17                                                        | 68.0%                |
| 92           | 1               | 303            | 110                | 65                                                        | 59.1%                |
| 92           | 6               | 101            | 82                 | 49                                                        | 59.8%                |
| 92           | 7               | 25             | 25                 | 16                                                        | 64.0%                |
| 93           | 1               | 703            | 124                | 78                                                        | 62.9%                |
| 93           | 6               | 600            | 122                | 67                                                        | 54.9%                |
| 93           | 7               | 100            | 80                 | 49                                                        | 61.3%                |
| 94           | 1               | 501            | 120                | 69                                                        | 57.5%                |
| 94           | 6               | 202            | 102                | 51                                                        | 50.0%                |
| 94           | 7               | 301            | 110                | 45                                                        | 40.9%                |
| 95           | 1               | 331            | 112                | 71                                                        | 63.4%                |
| 95           | 7               | 51             | 51                 | 25                                                        | 49.0%                |



TABLE VII (Continued)

**ANTELOPE** LICENSE DATA SUMMARY

| HUNT<br>AREA | LICENSE<br>TYPE | NUMBER<br>SOLD | NUMBER<br>SURVEYED | NUMBER<br>USABLE SURVEYS<br>(both hunters and nonhunters) | % USABLE<br>RESPONSE |
|--------------|-----------------|----------------|--------------------|-----------------------------------------------------------|----------------------|
| 96           | 1               | 279            | 108                | 53                                                        | 49.1%                |
| 96           | 6               | 125            | 88                 | 47                                                        | 53.4%                |
| 96           | 7               | 25             | 25                 | 15                                                        | 60.0%                |
| 97, 117      | 1               | 126            | 126                | 68                                                        | 54.0%                |
| 97, 117      | 6               | 111            | 106                | 58                                                        | 54.7%                |
| 97, 117      | 7               | 20             | 25 *               | 12                                                        | 48.0%                |
| 98           | 1               | 157            | 94                 | 56                                                        | 59.6%                |
| 98           | 6               | 300            | 110                | 73                                                        | 66.4%                |
| 99           | 1               | 128            | 88                 | 48                                                        | 54.6%                |
| 99           | 6               | 100            | 80                 | 45                                                        | 56.3%                |
| 99           | 7               | 199            | 102                | 35                                                        | 34.3%                |
| 99           | 8               | 51             | 51                 | 39                                                        | 76.5%                |
| 100          | 1               | 100            | 80                 | 52                                                        | 65.0%                |
| 100          | 6               | 300            | 110                | 70                                                        | 63.6%                |
| 102          | 1               | 449            | 120                | 61                                                        | 50.8%                |
| 102          | 6               | 350            | 120                | 42                                                        | 35.0%                |
| 103          | 1               | 363            | 114                | 72                                                        | 63.2%                |
| 103          | 6               | 50             | 52 *               | 26                                                        | 50.0%                |
| 103          | 7               | 200            | 102                | 46                                                        | 45.1%                |
| 104          | 1               | 204            | 102                | 52                                                        | 51.0%                |
| 104          | 6               | 175            | 98                 | 35                                                        | 35.7%                |
| 106          | 1               | 274            | 106                | 70                                                        | 66.0%                |
| 106          | 6               | 200            | 106                | 53                                                        | 50.0%                |
| 107          | 1               | 106            | 82                 | 54                                                        | 65.9%                |
| 107          | 6               | 150            | 94                 | 70                                                        | 74.5%                |
| 107          | 8               | 134            | 90                 | 60                                                        | 66.7%                |
| 108          | 1               | 106            | 82                 | 48                                                        | 58.5%                |
| 109          | 1               | 203            | 110                | 47                                                        | 42.7%                |
| 109          | 6               | 173            | 110                | 55                                                        | 50.0%                |
| 110          | 1               | 63             | 63                 | 37                                                        | 58.7%                |
| 110          | 6               | 25             | 25                 | 10                                                        | 40.0%                |
| 111          | 1               | 150            | 94                 | 43                                                        | 45.7%                |
| 111          | 6               | 200            | 103                | 39                                                        | 37.9%                |
| 112          | 1               | 177            | 98                 | 53                                                        | 54.1%                |
| 112          | 6               | 76             | 72                 | 44                                                        | 61.1%                |
| 113          | 1               | 177            | 99                 | 58                                                        | 58.6%                |
| 113          | 2               | 154            | 98                 | 68                                                        | 69.4%                |
| 113          | 6               | 247            | 110                | 50                                                        | 45.5%                |
| 114          | 1               | 57             | 57                 | 37                                                        | 64.9%                |
| 114          | 6               | 26             | 26                 | 18                                                        | 69.2%                |
| 115          | 1               | 102            | 82                 | 42                                                        | 51.2%                |
| 115          | 6               | 125            | 88                 | 55                                                        | 62.5%                |
| TOTAL        |                 | 65397          | 22918              | 12639                                                     | 55.1%                |

\* Actual downloads exceed WG&amp;F sales data.

# WYOMING GAME AND FISH COMMISSION

## CHAPTER 5

### ANTELOPE HUNTING SEASONS

Section 1. Authority. This regulation is promulgated by authority of W.S. §23-1-302, §23-1-703 and §23-2-104.

Section 2. Hunting Seasons Established. There shall be open seasons during 2007 for the hunting of antelope as set forth in this Chapter and in accordance with Chapter 2, General Hunting Regulation.

Section 3. Regular Hunting Seasons.

(a) Hunt areas, season dates and limitations.

| Hunt Area | Type | Date of Seasons |         | Limitations                                                                                       |
|-----------|------|-----------------|---------|---------------------------------------------------------------------------------------------------|
|           |      | Opens           | Closes  |                                                                                                   |
| 1         | 1    | Oct. 1          | Nov. 20 | Limited quota; 400 licenses any antelope                                                          |
|           | 6    | Oct. 1          | Nov. 20 | Limited quota; 250 licenses doe or fawn valid on private land                                     |
| 2         | 1    | Oct. 1          | Nov. 20 | Limited quota; 400 licenses any antelope                                                          |
|           | 6    | Oct. 1          | Nov. 20 | Limited quota; 400 licenses doe or fawn                                                           |
| 3         | 1    | Oct. 1          | Nov. 20 | Limited quota; 450 licenses any antelope                                                          |
|           | 6    | Oct. 1          | Nov. 20 | Limited quota; 400 licenses doe or fawn valid on private land                                     |
| 4         | 1    | Oct. 1          | Nov. 20 | Limited quota; 350 licenses any antelope                                                          |
|           | 6    | Oct. 1          | Nov. 20 | Limited quota; 300 licenses doe or fawn                                                           |
| 5         | 1    | Oct. 1          | Nov. 20 | Limited quota; 300 licenses any antelope                                                          |
|           | 6    | Oct. 1          | Nov. 20 | Limited quota; 400 licenses doe or fawn valid on private land                                     |
| 6         | 1    | Oct. 1          | Oct. 15 | Limited quota; 350 licenses any antelope                                                          |
|           | 6    | Oct. 1          | Oct. 15 | Limited quota; 150 licenses doe or fawn                                                           |
| 7         | 1    | Oct. 1          | Oct. 15 | Limited quota; 1,000 licenses any antelope                                                        |
|           | 6    | Oct. 1          | Oct. 15 | Limited quota; 800 licenses doe or fawn valid in that portion of Area 7 north of Lodgepole Creek  |
| 8         | 1    | Oct. 1          | Oct. 15 | Limited quota; 300 licenses any antelope                                                          |
|           | 6    | Oct. 1          | Oct. 15 | Limited quota; 50 licenses doe or fawn                                                            |
| 9         | 1    | Oct. 1          | Oct. 15 | Limited quota; 550 licenses any antelope                                                          |
|           | 6    | Oct. 1          | Oct. 31 | Limited quota; 400 licenses doe or fawn                                                           |
| 10        | 1    | Oct. 1          | Oct. 14 | Limited quota; 350 licenses any antelope                                                          |
|           | 6    | Oct. 1          | Oct. 31 | Limited quota; 500 licenses doe or fawn                                                           |
| 11        | 1    | Oct. 1          | Oct. 15 | Limited quota; 250 licenses any antelope                                                          |
|           | 6    | Oct. 1          | Oct. 15 | Limited quota; 300 licenses doe or fawn                                                           |
|           |      | Oct. 16         | Oct. 31 | Unused Area 11 Type 6 licenses valid in that portion of Area 11 in Niobrara County.               |
| 12        | 1    | Oct. 1          | Oct. 15 | Limited quota; 200 licenses any antelope                                                          |
|           | 6    | Oct. 1          | Oct. 15 | Limited quota; 250 licenses doe or fawn                                                           |
|           |      | Oct. 16         | Oct. 31 | Unused Area 12 Type 6 licenses valid in that portion of Area 12 in Converse and Niobrara Counties |

| Hunt Area  | Type | Date of Seasons |         | Limitations                                                                                                                 |
|------------|------|-----------------|---------|-----------------------------------------------------------------------------------------------------------------------------|
|            |      | Opens           | Closes  |                                                                                                                             |
| 15         | 1    | Oct. 1          | Oct. 14 | Limited quota; 800 licenses any antelope                                                                                    |
|            | 6    | Oct. 1          | Oct. 31 | Limited quota; 800 licenses doe or fawn                                                                                     |
| 16         | 1    | Oct. 1          | Oct. 14 | Limited quota; 500 licenses any antelope                                                                                    |
|            | 6    | Oct. 1          | Oct. 31 | Limited quota; 400 licenses doe or fawn                                                                                     |
| 17         | 1    | Oct. 1          | Oct. 31 | Limited quota; 1,200 licenses any antelope                                                                                  |
| 18         | 1    | Oct. 1          | Oct. 20 | Limited quota; 500 licenses any antelope                                                                                    |
| 19         | 1    | Oct. 1          | Oct. 20 | Limited quota; 700 licenses any antelope                                                                                    |
| 17, 18, 19 | 6    | Oct. 1          | Oct. 31 | Limited quota; 1,200 licenses doe or fawn valid on private land                                                             |
| 20         | 1    | Oct. 15         | Nov. 15 | Limited quota; 800 licenses any antelope                                                                                    |
|            | 6    | Oct. 15         | Nov. 15 | Limited quota; 600 licenses doe or fawn                                                                                     |
| 21         | 1    | Oct. 15         | Oct. 31 | Limited quota; 600 licenses any antelope                                                                                    |
|            | 6    | Oct. 15         | Oct. 31 | Limited quota; 600 licenses doe or fawn valid on private land                                                               |
| 22         | 1    | Oct. 1          | Oct. 31 | Limited quota; 800 licenses any antelope                                                                                    |
|            | 6    | Oct. 1          | Oct. 31 | Limited quota; 600 licenses doe or fawn                                                                                     |
| 23         | 1    | Oct. 1          | Oct. 31 | Limited quota; 2,000 licenses any antelope                                                                                  |
|            | 6    | Oct. 1          | Oct. 31 | Limited quota; 1,300 licenses doe or fawn valid on private land                                                             |
| 24         | 1    | Oct. 1          | Oct. 31 | Limited quota; 800 licenses any antelope                                                                                    |
|            | 6    | Oct. 1          | Oct. 31 | Limited quota; 700 licenses doe or fawn valid on private land                                                               |
| 25         | 1    | Oct. 1          | Oct. 14 | Limited quota; 650 licenses any antelope                                                                                    |
|            | 6    | Oct. 1          | Oct. 14 | Limited quota; 400 licenses doe or fawn valid in that portion of Area 25 south of the Ormsby Road (Natrona County Road 705) |
| 26         | 1    | Sept. 24        | Oct. 14 | Limited quota; 1,100 licenses any antelope, also valid in Area 28                                                           |
|            | 6    | Sept. 24        | Oct. 14 | Limited quota; 500 licenses doe or fawn, also valid in Area 28                                                              |
| 27         | 1    | Oct. 1          | Oct. 15 | Limited quota; 450 licenses any antelope                                                                                    |
|            | 6    | Oct. 1          | Oct. 15 | Limited quota; 450 licenses doe or fawn                                                                                     |
| 28         | 1    | Sept. 24        | Oct. 14 | Limited quota; 400 licenses any antelope, also valid in Area 26                                                             |
|            | 6    | Sept. 24        | Oct. 14 | Limited quota; 300 licenses doe or fawn, also valid in Area 26                                                              |
| 29         | 1    | Oct. 1          | Oct. 15 | Limited quota; 1,200 licenses any antelope                                                                                  |
|            | 6    | Oct. 1          | Oct. 15 | Limited quota; 800 licenses doe or fawn                                                                                     |
|            | 7    | Oct. 1          | Oct. 31 | Limited quota; 200 licenses doe or fawn valid in that portion of Area 29 west of Interstate Highway 25                      |
| 30         | 1    | Oct. 10         | Oct. 31 | Limited quota; 600 licenses any antelope                                                                                    |
|            | 6    | Oct. 10         | Oct. 31 | Limited quota; 700 licenses doe or fawn                                                                                     |
| 31         | 1    | Sept. 25        | Oct. 25 | Limited quota; 400 licenses any antelope                                                                                    |
|            | 6    | Sept. 25        | Oct. 25 | Limited quota; 450 licenses doe or fawn                                                                                     |

| Hunt Area | Type | Date of Seasons |         | Limitations                                                                                                                                      |
|-----------|------|-----------------|---------|--------------------------------------------------------------------------------------------------------------------------------------------------|
|           |      | Opens           | Closes  |                                                                                                                                                  |
| 32        | 1    | Sept. 25        | Oct. 25 | Limited quota; 450 licenses any antelope                                                                                                         |
|           | 2    | Oct. 5          | Oct. 25 | Limited quota; 250 licenses any antelope                                                                                                         |
|           | 6    | Sept. 25        | Oct. 25 | Limited quota; 650 licenses doe or fawn                                                                                                          |
| 34        | 1    | Oct. 1          | Oct. 14 | Limited quota; 225 licenses any antelope                                                                                                         |
|           | 6    | Oct. 1          | Oct. 14 | Limited quota; 200 licenses doe or fawn                                                                                                          |
|           |      | Nov. 15         | Dec. 31 | Unused Area 34 Type 6 licenses                                                                                                                   |
| 35        | 1    | Oct. 1          | Oct. 14 | Limited quota; 300 licenses any antelope                                                                                                         |
|           | 6    | Oct. 1          | Oct. 14 | Limited quota; 200 licenses doe or fawn                                                                                                          |
|           |      | Nov. 15         | Dec. 31 | Unused Area 35 Type 6 licenses                                                                                                                   |
| 36        | 1    | Oct. 1          | Oct. 14 | Limited quota; 200 licenses any antelope                                                                                                         |
|           | 6    | Oct. 1          | Oct. 14 | Limited quota; 200 licenses doe or fawn                                                                                                          |
|           |      | Nov. 15         | Dec. 31 | Unused Area 36 Type 6 licenses                                                                                                                   |
| 37        | 1    | Sept. 15        | Oct. 14 | Limited quota; 275 licenses any antelope                                                                                                         |
|           | 6    | Sept. 15        | Oct. 14 | Limited quota; 75 licenses doe or fawn valid in that portion of Area 37 east of the Harriman Road (Wyoming Highway 218, Laramie County Road 102) |
| 38        | 1    | Oct. 5          | Oct. 31 | Limited quota; 550 licenses any antelope                                                                                                         |
|           | 6    | Oct. 5          | Oct. 31 | Limited quota; 500 licenses doe or fawn                                                                                                          |
| 39        | 1    | Oct. 5          | Oct. 31 | Limited quota; 300 licenses any antelope                                                                                                         |
|           | 6    | Oct. 5          | Oct. 31 | Limited quota; 100 licenses doe or fawn                                                                                                          |
| 40        | 1    | Oct. 5          | Oct. 31 | Limited quota; 200 licenses any antelope                                                                                                         |
|           | 6    | Oct. 5          | Oct. 31 | Limited quota; 200 licenses doe or fawn                                                                                                          |
| 41        | 1    | Sept. 25        | Oct. 31 | Limited quota; 50 licenses any antelope                                                                                                          |
|           | 6    | Sept. 25        | Oct. 31 | Limited quota; 50 licenses doe or fawn                                                                                                           |
| 42        | 1    | Sept. 25        | Oct. 31 | Limited quota; 650 licenses any antelope                                                                                                         |
|           | 6    | Sept. 25        | Oct. 31 | Limited quota; 300 licenses doe or fawn                                                                                                          |
|           | 7    | Oct. 5          | Oct. 31 | Limited quota; 200 licenses doe or fawn                                                                                                          |
| 43        | 1    | Sept. 15        | Oct. 14 | Limited quota; 400 licenses any antelope                                                                                                         |
|           | 6    | Sept. 15        | Oct. 14 | Limited quota; 400 licenses doe or fawn                                                                                                          |
| 44        | 1    | Sept. 15        | Oct. 14 | Limited quota; 250 licenses any antelope                                                                                                         |
|           | 6    | Sept. 15        | Oct. 14 | Limited quota; 300 licenses doe or fawn                                                                                                          |
| 45        | 1    | Sept. 15        | Oct. 14 | Limited quota; 650 licenses any antelope                                                                                                         |
|           | 6    | Sept. 15        | Oct. 14 | Limited quota; 600 licenses doe or fawn                                                                                                          |
| 46        | 1    | Sept. 25        | Oct. 25 | Limited quota; 500 licenses any antelope                                                                                                         |
|           | 6    | Sept. 25        | Oct. 25 | Limited quota; 300 licenses doe or fawn                                                                                                          |
|           | 7    | Oct. 5          | Oct. 25 | Limited quota; 200 licenses doe or fawn                                                                                                          |

| Hunt Area | Type | Date of Seasons |          | Limitations                                                                                                                                                                                                                                         |
|-----------|------|-----------------|----------|-----------------------------------------------------------------------------------------------------------------------------------------------------------------------------------------------------------------------------------------------------|
|           |      | Opens           | Closes   |                                                                                                                                                                                                                                                     |
| 47        | 1    | Sept. 25        | Oct. 31  | Limited quota; 1,000 licenses any antelope                                                                                                                                                                                                          |
|           | 2    | Oct. 5          | Oct. 31  | Limited quota; 350 licenses any antelope                                                                                                                                                                                                            |
|           | 6    | Sept. 25        | Oct. 31  | Limited quota; 700 licenses doe or fawn                                                                                                                                                                                                             |
|           | 7    | Oct. 5          | Oct. 31  | Limited quota; 400 licenses doe or fawn                                                                                                                                                                                                             |
| 48        | 1    | Sept. 25        | Oct. 31  | Limited quota; 350 licenses any antelope                                                                                                                                                                                                            |
|           | 2    | Oct. 5          | Oct. 31  | Limited quota; 150 licenses any antelope                                                                                                                                                                                                            |
|           | 6    | Sept. 25        | Oct. 31  | Limited quota; 375 licenses doe or fawn                                                                                                                                                                                                             |
|           | 7    | Oct. 5          | Oct. 31  | Limited quota; 475 licenses doe or fawn valid in that portion of Area 48 north of the Medicine Bow River                                                                                                                                            |
|           |      | Nov. 1          | Nov. 30  | Unused Area 48 Type 6 and Type 7 licenses valid in that portion of Area 48 north of the Lost Creek-Medicine Bow River hydrographic divide and west of Carbon County Road 291; or north of Carbon County Road 102 and west of Carbon County Road 103 |
| 50        | 1    | Sept. 15        | Oct. 31  | Limited quota; 500 licenses any antelope                                                                                                                                                                                                            |
|           | 6    | Sept. 15        | Oct. 31  | Limited quota; 500 licenses doe or fawn                                                                                                                                                                                                             |
|           | 8    | Sept. 1         | Sept. 14 | Limited quota; 50 licenses any antelope, muzzle-loading firearms only                                                                                                                                                                               |
| 51        | 1    | Sept. 15        | Nov. 14  | Limited quota; 100 licenses any antelope                                                                                                                                                                                                            |
|           | 6    | Sept. 15        | Nov. 14  | Limited quota; 150 licenses doe or fawn                                                                                                                                                                                                             |
| 52        | 1    | Sept. 25        | Oct. 31  | Limited quota; 250 licenses any antelope                                                                                                                                                                                                            |
|           | 2    | Sept. 25        | Oct. 31  | Limited quota; 250 licenses any antelope valid in that portion of Area 52 south of North Spring Creek                                                                                                                                               |
|           | 6    | Sept. 25        | Oct. 31  | Limited quota; 200 licenses doe or fawn                                                                                                                                                                                                             |
|           | 7    | Sept. 25        | Nov. 14  | Limited quota; 100 licenses doe or fawn valid in that portion of Area 52 south of North Spring Creek                                                                                                                                                |
| 53        | 1    | Sept. 20        | Oct. 14  | Limited quota; 550 licenses any antelope                                                                                                                                                                                                            |
|           | 6    | Sept. 20        | Oct. 14  | Limited quota; 750 licenses doe or fawn                                                                                                                                                                                                             |
|           | 7    | Sept. 1         | Oct. 14  | Limited quota; 25 licenses doe or fawn valid on private land                                                                                                                                                                                        |
| 55        | 1    | Sept. 20        | Oct. 14  | Limited quota; 150 licenses any antelope                                                                                                                                                                                                            |
|           | 6    | Sept. 20        | Oct. 14  | Limited quota; 100 licenses doe or fawn                                                                                                                                                                                                             |
| 56        | 1    | Sept. 20        | Oct. 14  | Limited quota; 200 licenses any antelope                                                                                                                                                                                                            |
| 57        | 1    | Sept. 20        | Oct. 14  | Limited quota; 300 licenses any antelope                                                                                                                                                                                                            |
|           | 6    | Sept. 1         | Oct. 14  | Limited quota; 25 licenses doe or fawn                                                                                                                                                                                                              |
| 58        | 1    | Sept. 20        | Oct. 14  | Limited quota; 150 licenses any antelope                                                                                                                                                                                                            |
| 59        | 1    | Sept. 20        | Oct. 14  | Limited quota; 175 licenses any antelope                                                                                                                                                                                                            |
|           | 6    | Sept. 20        | Oct. 14  | Limited quota; 125 licenses doe or fawn                                                                                                                                                                                                             |
| 60        | 1    | Sept. 15        | Oct. 14  | Limited quota; 100 licenses any antelope                                                                                                                                                                                                            |
| 61        | 1    | Sept. 1         | Sept. 30 | Limited quota; 150 licenses any antelope                                                                                                                                                                                                            |
| 62        | 1    | Sept. 8         | Oct. 14  | Limited quota; 400 licenses any antelope                                                                                                                                                                                                            |
| 63        | 1    | Sept. 11        | Oct. 14  | Limited quota; 400 licenses any antelope                                                                                                                                                                                                            |
|           | 6    | Sept. 11        | Oct. 14  | Limited quota; 150 licenses doe or fawn                                                                                                                                                                                                             |

| Hunt Area | Type | Date of Seasons |          | Limitations                                                                                                                                                                              |
|-----------|------|-----------------|----------|------------------------------------------------------------------------------------------------------------------------------------------------------------------------------------------|
|           |      | Opens           | Closes   |                                                                                                                                                                                          |
| 64        | 1    | Sept. 15        | Oct. 14  | Limited quota; 250 licenses any antelope                                                                                                                                                 |
| 65        | 1    | Sept. 15        | Oct. 22  | Limited quota; 250 licenses any antelope                                                                                                                                                 |
|           | 6    | Sept. 15        | Oct. 22  | Limited quota; 250 licenses doe or fawn                                                                                                                                                  |
| 66        | 1    | Sept. 15        | Oct. 22  | Limited quota; 75 licenses any antelope                                                                                                                                                  |
|           | 6    | Sept. 15        | Oct. 22  | Limited quota; 75 licenses doe or fawn                                                                                                                                                   |
| 67        | 1    | Sept. 15        | Oct. 22  | Limited quota; 200 licenses any antelope                                                                                                                                                 |
|           | 6    | Sept. 15        | Oct. 22  | Limited quota; 125 licenses doe or fawn                                                                                                                                                  |
| 68        | 1    | Sept. 15        | Oct. 22  | Limited quota; 300 licenses any antelope                                                                                                                                                 |
|           | 6    | Sept. 15        | Oct. 22  | Limited quota; 250 licenses doe or fawn                                                                                                                                                  |
| 69        | 1    | Sept. 15        | Oct. 22  | Limited quota; 100 licenses any antelope                                                                                                                                                 |
|           | 6    | Sept. 15        | Oct. 22  | Limited quota; 50 licenses doe or fawn                                                                                                                                                   |
| 70        | 1    | Sept. 15        | Oct. 22  | Limited quota; 200 licenses any antelope                                                                                                                                                 |
|           | 6    | Sept. 15        | Nov. 30  | Limited quota; 300 licenses doe or fawn                                                                                                                                                  |
| 71        | 1    | Sept. 15        | Oct. 22  | Limited quota; 300 licenses any antelope                                                                                                                                                 |
|           | 6    | Sept. 15        | Oct. 22  | Limited quota; 200 licenses doe or fawn                                                                                                                                                  |
| 72        | 1    | Sept. 15        | Oct. 22  | Limited quota; 900 licenses any antelope                                                                                                                                                 |
|           | 6    | Sept. 15        | Oct. 22  | Limited quota; 450 licenses doe or fawn                                                                                                                                                  |
| 73        | 1    | Sept. 15        | Sept. 30 | Limited quota; 500 licenses any antelope                                                                                                                                                 |
|           | 2    | Oct. 12         | Oct. 31  | Limited quota; 300 licenses any antelope                                                                                                                                                 |
|           | 6    | Sept. 15        | Oct. 31  | Limited quota; 400 licenses doe or fawn                                                                                                                                                  |
|           | 7    | Nov. 1          | Nov. 20  | Limited quota; 50 licenses doe or fawn valid in that portion of Area 73 east of the Bucknum Road (Natrona County Road 125) in the Casper Creek drainage                                  |
| 74        | 1    | Sept. 15        | Oct. 22  | Limited quota; 200 licenses any antelope                                                                                                                                                 |
|           | 6    | Sept. 15        | Oct. 22  | Limited quota; 175 licenses doe or fawn                                                                                                                                                  |
| 75        | 1    | Sept. 15        | Oct. 22  | Limited quota; 400 licenses any antelope                                                                                                                                                 |
|           | 6    | Sept. 15        | Oct. 22  | Limited quota; 275 licenses doe or fawn                                                                                                                                                  |
| 76        | 1    | Oct. 9          | Oct. 31  | Limited quota; 100 licenses any antelope                                                                                                                                                 |
|           | 6    | Sept. 1         | Oct. 31  | Limited quota; 35 licenses doe or fawn                                                                                                                                                   |
| 77        | 1    | Sept. 20        | Oct. 14  | Limited quota; 50 licenses any antelope                                                                                                                                                  |
|           | 6    | Sept. 1         | Oct. 14  | Limited quota; 30 licenses doe or fawn valid on private land in Big Horn County or in that portion of Area 77 north of Wyoming Highway 30 or east of U.S. Highway 16-20                  |
|           | 7    | Sept. 1         | Oct. 14  | Limited quota; 25 licenses doe or fawn valid on private land in that portion of Area 77 in Washakie County                                                                               |
| 78        | 1    | Sept. 1         | Sept. 15 | Limited quota; 50 licenses any antelope                                                                                                                                                  |
|           | 6    | Sept. 1         | Oct. 31  | Limited quota; 50 licenses doe or fawn valid in that portion of Area 78 south of U.S. Highway 14-16-20 and that portion of Area 78 south of Little Dry Creek east of Wyoming Highway 789 |
|           | 7    | Sept. 1         | Oct. 31  | Limited quota; 35 licenses doe or fawn valid in that portion of Area 78 west of the Oregon Basin/Garland power line                                                                      |

| Hunt Area | Type | Date of Seasons |          | Limitations                                                                                                                                                                                                                  |
|-----------|------|-----------------|----------|------------------------------------------------------------------------------------------------------------------------------------------------------------------------------------------------------------------------------|
|           |      | Opens           | Closes   |                                                                                                                                                                                                                              |
| 79, 116   | 9    | Aug. 15         | Sept. 30 | Limited quota; 30 licenses any antelope, archery only                                                                                                                                                                        |
| 80        | 1    | Sept. 1         | Sept. 30 | Limited quota; 100 licenses any antelope                                                                                                                                                                                     |
|           | 6    | Sept. 1         | Sept. 30 | Limited quota; 100 licenses doe or fawn valid on private land                                                                                                                                                                |
| 81        | 1    | Oct. 1          | Nov. 15  | Limited quota; 25 licenses any antelope valid in that portion of Area 81 east of Wyoming Highway 120                                                                                                                         |
|           | 2    | Nov. 1          | Nov. 15  | Limited quota; 50 licenses any antelope                                                                                                                                                                                      |
| 82        | 1    | Sept. 20        | Oct. 14  | Limited quota; 75 licenses any antelope                                                                                                                                                                                      |
|           | 6    | Sept. 1         | Sept. 19 | Limited quota; 35 licenses doe or fawn valid in that portion of Area 82 south of the Lower Greybull River Road (Park County Road 3LE) and east of Coyote Canyon Road (Park County Road 3SL) to the Park-Big Horn County line |
|           |      | Sept. 20        | Oct. 14  | Unused Area 82 Type 6 doe or fawn valid in that portion of Area 82 west of Wyoming Highway 120                                                                                                                               |
| 83        | 1    | Oct. 9          | Oct. 31  | Limited quota; 75 licenses any antelope                                                                                                                                                                                      |
|           | 6    | Sept. 1         | Oct. 31  | Limited quota; 50 licenses doe or fawn valid on private land                                                                                                                                                                 |
| 84        | 1    | Sept. 15        | Oct. 22  | Limited quota; 35 licenses any antelope                                                                                                                                                                                      |
|           | 6    | Sept. 15        | Oct. 22  | Limited quota; 25 licenses doe or fawn                                                                                                                                                                                       |
| 85        | 1    | Sept. 10        | Oct. 31  | Limited quota; 15 licenses any antelope                                                                                                                                                                                      |
| 86        | 1    | Sept. 10        | Oct. 31  | Limited quota; 30 licenses any antelope                                                                                                                                                                                      |
|           | 6    | Sept. 10        | Oct. 31  | Limited quota; 25 licenses doe or fawn                                                                                                                                                                                       |
| 87        | 1    | Sept. 10        | Oct. 31  | Limited quota; 200 licenses any antelope                                                                                                                                                                                     |
|           | 2    | Sept. 25        | Oct. 31  | Limited quota; 150 licenses any antelope                                                                                                                                                                                     |
|           | 6    | Sept. 10        | Oct. 31  | Limited quota; 250 licenses doe or fawn                                                                                                                                                                                      |
|           | 7    | Sept. 25        | Oct. 31  | Limited quota; 250 licenses doe or fawn                                                                                                                                                                                      |
| 88        | 1    | Sept. 10        | Oct. 31  | Limited quota; 250 licenses any antelope                                                                                                                                                                                     |
|           | 6    | Oct. 1          | Oct. 31  | Limited quota; 275 licenses doe or fawn                                                                                                                                                                                      |
| 89        | 1    | Sept. 10        | Oct. 31  | Limited quota; 250 licenses any antelope                                                                                                                                                                                     |
|           | 6    | Oct. 1          | Oct. 31  | Limited quota; 175 licenses doe or fawn                                                                                                                                                                                      |
|           | 7    | Oct. 1          | Oct. 31  | Limited quota; 75 licenses doe or fawn valid in that portion of Area 89 south of Wyoming Highway 351 and east of U.S. Highway 189                                                                                            |
| 90        | 1    | Sept. 10        | Oct. 31  | Limited quota; 200 licenses any antelope valid in that portion of Area 90 east of U.S. Highway 191                                                                                                                           |
|           | 2    | Sept. 10        | Oct. 31  | Limited quota; 200 licenses any antelope valid in that portion of Area 90 west of U.S. Highway 191                                                                                                                           |
|           | 6    | Sept. 1         | Sept. 9  | Limited quota; 175 licenses doe or fawn valid in that portion of Area 90 east of U.S. Highway 191 on private land                                                                                                            |
|           |      | Sept. 10        | Oct. 31  | Unused Area 90 Type 6 licenses doe or fawn valid in that portion of Area 90 east of U.S. Highway 191                                                                                                                         |
|           | 7    | Sept. 10        | Oct. 31  | Limited quota; 175 licenses doe or fawn valid in that portion of Area 90 west of U.S. Highway 191                                                                                                                            |

| Hunt Area | Type | Date of Seasons |          | Limitations                                                                                                                                                   |
|-----------|------|-----------------|----------|---------------------------------------------------------------------------------------------------------------------------------------------------------------|
|           |      | Opens           | Closes   |                                                                                                                                                               |
| 91        | 1    | Sept. 10        | Oct. 14  | Limited quota; 400 licenses any antelope                                                                                                                      |
|           | 6    | Sept. 10        | Oct. 14  | Limited quota; 125 licenses doe or fawn                                                                                                                       |
|           | 7    | Sept. 10        | Oct. 14  | Limited quota; 25 licenses doe or fawn valid in that portion of Area 91 within the Farson-Eden Irrigation Project                                             |
| 92        | 1    | Sept. 10        | Oct. 14  | Limited quota; 300 licenses any antelope                                                                                                                      |
|           | 6    | Sept. 10        | Oct. 14  | Limited quota; 100 licenses doe or fawn                                                                                                                       |
|           | 7    | Sept. 10        | Oct. 14  | Limited quota; 25 licenses doe or fawn valid in that portion of Area 92 within the Farson-Eden Irrigation Project                                             |
| 93        | 1    | Sept. 10        | Oct. 14  | Limited quota; 700 licenses any antelope                                                                                                                      |
|           | 6    | Sept. 10        | Oct. 14  | Limited quota; 600 licenses doe or fawn                                                                                                                       |
|           | 7    | Sept. 10        | Oct. 14  | Limited quota; 100 licenses doe or fawn valid in that portion of Area 93 north and west of Wyoming Highway 189 on private land                                |
| 94        | 1    | Sept. 10        | Oct. 14  | Limited quota; 500 licenses any antelope                                                                                                                      |
|           | 6    | Sept. 10        | Oct. 14  | Limited quota; 200 licenses doe or fawn                                                                                                                       |
|           | 7    | Sept. 10        | Oct. 14  | Limited quota; 300 licenses doe or fawn valid in that portion of Area 94 on irrigated lands                                                                   |
| 95        | 1    | Sept. 10        | Oct. 14  | Limited quota; 325 licenses any antelope                                                                                                                      |
|           | 7    | Sept. 10        | Oct. 14  | Limited quota; 50 licenses doe or fawn valid in that portion of Area 95 west of Cottonwood Creek or the Smith's Fork River                                    |
| 96        | 1    | Sept. 10        | Oct. 14  | Limited quota; 275 licenses any antelope                                                                                                                      |
|           | 6    | Sept. 10        | Oct. 14  | Limited quota; 125 licenses doe or fawn                                                                                                                       |
|           | 7    | Sept. 10        | Oct. 14  | Limited quota; 25 licenses doe or fawn valid in that portion of Area 96 within the Farson-Eden Irrigation Project                                             |
| 97, 117   | 1    | Sept. 15        | Oct. 22  | Limited quota; 125 licenses any antelope                                                                                                                      |
|           | 6    | Sept. 15        | Oct. 22  | Limited quota; 100 licenses doe or fawn                                                                                                                       |
|           | 7    | Sept. 15        | Oct. 22  | Limited quota; 25 licenses doe or fawn valid in that portion of Area 97 south of U.S. Highway 26 and in all of Area 117                                       |
| 98        | 1    | Sept. 10        | Oct. 14  | Limited quota; 150 licenses any antelope                                                                                                                      |
|           | 6    | Sept. 10        | Oct. 14  | Limited quota; 300 licenses doe or fawn                                                                                                                       |
| 99        | 1    | Sept. 10        | Oct. 14  | Limited quota; 125 licenses any antelope                                                                                                                      |
|           | 6    | Sept. 10        | Oct. 14  | Limited quota; 100 licenses doe or fawn valid in that portion of Area 99 west of Wyoming Highway 410 and Uinta County Road 283 (U.S. Forest Service Road 075) |
|           | 7    | Sept. 10        | Oct. 14  | Limited quota; 200 licenses doe or fawn valid in that portion of Area 99 east of Wyoming Highway 410 and Uinta County Road 283 (U.S. Forest Service Road 075) |
|           | 8    | Sept. 1         | Sept. 30 | Limited quota; 50 licenses any antelope, muzzle-loading firearms only                                                                                         |
| 100       | 1    | Sept. 10        | Oct. 14  | Limited quota; 100 licenses any antelope                                                                                                                      |
|           | 6    | Sept. 10        | Oct. 14  | Limited quota; 300 licenses doe or fawn                                                                                                                       |
| 102       | 1    | Oct. 15         | Nov. 15  | Limited quota; 500 licenses any antelope                                                                                                                      |
|           | 6    | Oct. 15         | Nov. 15  | Limited quota; 500 licenses doe or fawn                                                                                                                       |



| Hunt Area | Type | Date of Seasons |          | Limitations                                                                                                                                                      |
|-----------|------|-----------------|----------|------------------------------------------------------------------------------------------------------------------------------------------------------------------|
|           |      | Opens           | Closes   |                                                                                                                                                                  |
| 103       | 1    | Oct. 5          | Oct. 31  | Limited quota; 350 licenses any antelope                                                                                                                         |
|           | 6    | Oct. 5          | Oct. 31  | Limited quota; 50 licenses doe or fawn                                                                                                                           |
|           | 7    | Oct. 5          | Oct. 31  | Limited quota; 200 licenses doe or fawn valid in that portion of Area 103 south of Cottonwood Creek                                                              |
| 104       | 1    | Oct. 20         | Nov. 11  | Limited quota; 200 licenses any antelope                                                                                                                         |
|           | 6    | Oct. 20         | Nov. 11  | Limited quota; 175 licenses doe or fawn                                                                                                                          |
|           |      | Nov. 12         | Dec. 31  | Unused Area 104 Type 6 licenses valid in that portion of Area 104 off national forest                                                                            |
| 106       | 1    | Sept. 15        | Oct. 22  | Limited quota; 250 licenses any antelope                                                                                                                         |
|           | 6    | Sept. 15        | Oct. 22  | Limited quota; 250 licenses doe or fawn                                                                                                                          |
| 107       | 1    | Sept. 10        | Sept. 30 | Limited quota; 100 licenses any antelope                                                                                                                         |
|           | 6    | Sept. 10        | Sept. 30 | Limited quota; 150 licenses doe or fawn                                                                                                                          |
|           | 8    | Aug. 20         | Sept. 9  | Limited quota; 125 licenses any antelope, muzzle-loading firearms and handguns only                                                                              |
| 108       | 1    | Sept. 20        | Oct. 14  | Limited quota; 100 licenses any antelope                                                                                                                         |
| 109       | 1    | Sept. 15        | Nov. 30  | Limited quota; 300 licenses any antelope                                                                                                                         |
|           | 6    | Sept. 15        | Nov. 30  | Limited quota; 300 licenses doe or fawn                                                                                                                          |
| 110       | 1    | Sept. 20        | Oct. 14  | Limited quota; 60 licenses any antelope                                                                                                                          |
|           | 6    | Sept. 20        | Oct. 14  | Limited quota; 25 licenses doe or fawn valid on private land                                                                                                     |
| 111       | 1    | Sept. 15        | Oct. 14  | Limited quota; 150 licenses any antelope                                                                                                                         |
|           | 6    | Sept. 15        | Oct. 14  | Limited quota; 200 licenses doe or fawn                                                                                                                          |
|           |      | Nov. 15         | Dec. 31  | Unused Area 111 Type 6 licenses                                                                                                                                  |
| 112       | 1    | Sept. 20        | Oct. 14  | Limited quota; 175 licenses any antelope                                                                                                                         |
|           | 6    | Sept. 20        | Oct. 14  | Limited quota; 75 licenses doe or fawn                                                                                                                           |
| 113       | 1    | Oct. 1          | Oct. 31  | Limited quota; 175 licenses any antelope                                                                                                                         |
|           | 2    | Oct. 11         | Oct. 31  | Limited quota; 175 licenses any antelope                                                                                                                         |
|           | 6    | Oct. 1          | Oct. 31  | Limited quota; 300 licenses doe or fawn                                                                                                                          |
| 114       | 1    | Oct. 1          | Oct. 31  | Limited quota; 50 licenses any antelope                                                                                                                          |
|           | 6    | Sept. 1         | Oct. 31  | Limited quota; 25 licenses doe or fawn valid on private land                                                                                                     |
| 115       | 1    | Oct. 9          | Oct. 31  | Limited quota; 100 licenses any antelope                                                                                                                         |
|           | 6    | Oct. 9          | Oct. 31  | Limited quota; 125 licenses doe or fawn valid in that portion of Area 115 east of the Upper Nowood Road or south and west of Nowater Stock Trail (BLM Road 1411) |

Section 4. Special Archery Seasons. Hunt Areas listed in this section shall have special archery hunting seasons starting on the dates as specified in this section. Special archery seasons close when the earliest any antelope season for the Hunt Area opens as listed in Section 3.

Archers shall possess a limited quota antelope license in addition to an archery license in order to hunt antelope during any special archery season. Archers shall hunt only in the Hunt Area(s) and for the sex of antelope set forth by the limitations of their license as specified in Section 3 of this Chapter.

| Hunt Area                                                                                | Opening Date | Limitations                        |
|------------------------------------------------------------------------------------------|--------------|------------------------------------|
| 1-10, 15-24, 27, 29, 30, 102, 113                                                        | Sept. 1      | Refer to Section 3 of this Chapter |
| 11,12, 25, 26, 28, 31, 32, 34-48, 50-53, 55-78, 80-100, 103, 104, 106-112, 114, 115, 117 | Aug. 15      | Refer to Section 3 of this Chapter |

## Section 5. Hunt Area Descriptions.

### (a) Area and Number.

Area 1. Crook. Beginning where Wyoming Highway 112 crosses the Wyoming-Montana state line; southwesterly along said highway to Wyoming Highway 24 in the town of Hulett; southerly along said highway to U.S. Highway 14; westerly along said highway to the Cabin Creek Road; northwesterly along said road to Oshoto and the Oshoto Road connection; westerly along said road to the "D" Road; northerly along said road to the Rocky Point Road; northerly along said road to the Wyoming-Montana state line.

Area 2. Bearlodge. Beginning where Wyoming Highway 112 crosses the Wyoming-Montana state line; easterly along said line to the Wyoming-South Dakota state line; southerly along said line to Interstate Highway 90; southwesterly along said highway to the town of Sundance and U.S. Highway 14; westerly and northerly along said highway to Wyoming Highway 24; northerly along said highway to Wyoming Highway 112 in the town of Hulett; northeasterly along said highway to the Wyoming-Montana state line.

Area 3. Keyhole. Beginning where Interstate Highway 90 intersects U.S. Highway 14 in the town of Sundance; southerly and westerly along Interstate Highway 90 to its intersection with the "D" Road; northerly along said road to the Oshoto Road connection; easterly along said road to Oshoto and the Cabin Creek Road; southerly and easterly along the Cabin Creek Road to U.S. Highway 14; easterly and southerly along said highway to Interstate Highway 90 in the town of Sundance.

Area 4. Arch Creek. Beginning in the town of Upton where U.S. Highway 16 intersects Wyoming Highway 116; westerly and northerly along U.S. Highway 16 to Interstate Highway 90 in the town of Moorcroft; easterly and northerly along said highway to U.S. Highway 14; easterly along said highway to Wyoming Highway 116; southerly and westerly along said highway to its junction with U.S. Highway 16 in the town of Upton.

Area 5. Inyan Kara. Beginning where Interstate Highway 90 intersects the Wyoming-South Dakota state line; southerly along said line to U.S. Highway 16; northerly and westerly along said highway to Wyoming Highway 116 in the town of Upton; northerly and easterly along said highway to U.S. Highway 14; westerly along said highway to Interstate Highway 90; northerly and easterly along said highway to the Wyoming-South Dakota state line.

Area 6. South Newcastle. Beginning where U.S. Highway 16 intersects the Wyoming-South Dakota state line; southerly along said line to the Dewey Road; northwesterly along said road to U.S. Highway 85; southerly along said highway to Cheyenne River Road N. (Weston County); westerly along said road to the Lynch Road; northerly along said road to Wyoming Highway 450; northeasterly along said highway to U.S. Highway 16; southeasterly along said highway to the Wyoming-South Dakota state line.

Area 7. South Upton. Beginning where Wyoming Highway 450 intersects U.S. Highway 16; southwesterly along Wyoming Highway 450 to the Keeline Road (U.S.F.S. Road 930); northwesterly along said road to Black Thunder Creek; easterly down said creek to Bacon Creek; northerly up said creek to Newel Prong; northerly up said prong to the divide between the Cheyenne River and Belle Fourche River; northeasterly along said divide to the divide between Four Horse Creek and Raven Creek; northwesterly along said divide to the Belle Fourche River; northeasterly down said river to U.S. Highway 16; southeasterly along said highway to Wyoming Highway 450.

Area 8. Niobrara. Beginning where the Boner Road crosses the Wyoming-South Dakota state line; westerly along said road to U.S. Highway 85; southerly along said highway to Wyoming Highway 270; westerly

along said highway to Wyoming Highway 272; northerly along said highway to the North Lance Creek Road; northerly and westerly along said road to the Niobrara-Converse county line and the Dull Center Road (Converse County Road 38); westerly along said road to the Clareton Road (Converse County Road 39); northeasterly along said road to the Niobrara-Weston county line and the Lynch Road; northerly along said road to the Cheyenne River Road N. (Weston County); easterly along said road to U.S. Highway 85; northerly along said highway to the Dewey Road; southeasterly along said road to the Wyoming-South Dakota state line; southerly along said line to the Boner Road.

Area 9. Lance Creek. Beginning where U.S. Highway 20 crosses the Wyoming-Nebraska state line; westerly along said highway to the Twenty Mile Creek Road (Converse County Road 46) at Lost Springs; northerly along said road to the Manning Road (Converse County Road 53); easterly along said road to the Twenty Mile Road (Niobrara County) at the Converse-Niobrara county line; easterly along said road to Wyoming Highway 271; easterly along said highway to the town of Lance Creek and Wyoming Highway 270; northerly and easterly along said highway to U.S. Highway 85; northerly along said highway to the Boner Road; easterly along said road to the Wyoming-South Dakota state line; southerly along said line to the Wyoming-Nebraska state line; southerly along said line to U.S. Highway 20.

Area 10. Lake De Smet. Beginning at the town of Ucross and U.S. Highway 16; southerly along said highway to Interstate Highway 90; northwesterly along said highway to the Meade Creek Road (Sheridan County Road 131); northeasterly along said road to U.S. Highway 14; southeasterly along said highway to the town of Ucross and U.S. Highway 16.

Area 11. Rawhide Butte. Beginning where U.S. Highway 20 intersects the Wyoming-Nebraska state line; southerly along said line to the North Platte River; northwesterly up said river to U.S. Highway 26 at the town of Guernsey; easterly along said highway to Wyoming Highway 270; northerly along said highway to U.S. Highway 20; easterly along said highway to the Wyoming-Nebraska state line.

Area 12. Meadowdale. Beginning where U.S. Highway 20 intersects Wyoming Highway 270; southerly along Wyoming Highway 270 to U.S. Highway 26; westerly along said highway to the North Platte River; northwesterly up said river to Glendo Dam; northerly along the eastern shore of Glendo Reservoir to the North Platte River; northwesterly up said river to Interstate Highway 25; northerly along said highway to U.S. Highway 20 at Orin Junction; easterly along said highway to Wyoming Highway 270.

Area 15. Clearmont. Beginning where the Powder River crosses the Wyoming-Montana state line; southerly up said river to U.S. Highway 14; westerly along said highway to the Meade Creek Road (Sheridan County Road 131); southwesterly along said road to Interstate Highway 90; northwesterly along said highway to the Wyoming-Montana state line; easterly along said line to the Powder River.

Area 16. Ucross. Beginning where U.S. Highway 14 crosses the Powder River; southerly up said river to Interstate Highway 90; northwesterly along said highway to U.S. Highway 16; northeasterly along said highway to U.S. Highway 14; easterly along said highway to the Powder River.

Area 17. Gillette. Beginning where Wyoming Highway 59 crosses the Wyoming-Montana state line; southerly along said highway to U.S. Highway 14-16; southerly along said highway to Interstate Highway 90 west of the town of Gillette; westerly along said highway to the Powder River; northerly down said river to the Wyoming-Montana state line; easterly along said line to Wyoming Highway 59.

Area 18. Rockypoint. Beginning where the Rocky Point Road crosses the Wyoming-Montana state line; southerly along said road to the "D" Road; southerly along said road to Cabin Creek; westerly up said creek to the Cabin-Mitchell Creek hydrographic divide; westerly along said divide to Mitchell Creek; westerly down said creek to the Spring Creek Road north of Adon; southerly and westerly along said road to the Cow Creek Road; westerly along said road to Wyoming Highway 59; northerly along said highway to the Wyoming-Montana state line; easterly along said line to the Rocky Point Road.

Area 19. Rozet. Beginning where the "D" Road crosses Cabin Creek; southerly along said road to Interstate Highway 90; westerly along said highway to U.S. Highway 14-16 west of the city of Gillette; northerly

along said highway to Wyoming Highway 59; northerly along said highway to the Cow Creek Road; easterly along said road to the Spring Creek Road north of Adon; northeasterly along said road to Mitchell Creek; easterly up said creek to the Mitchell Creek-Cabin Creek hydrographic divide; easterly along said divide to Cabin Creek; easterly down said creek to the "D" Road.

Area 20. Upper Powder River. Beginning at the junction of the Trabing Road (Johnson County Road 13) and Interstate Highway 25; southerly along said highway to Wyoming Highway 191; westerly along said highway to Wyoming Highway 190; southerly along said highway to the town of Barnum and the Barnum Mountain Road; westerly along said road to the Hazelton Road (Washakie County Road 81-Johnson County Road 3); northerly along said road to the Gold Mine Road (U.S.F.S. Road 452); northerly along said road to the Canyon Creek Road (U.S.F.S. Road 25); northerly along said road to U.S. Highway 16; easterly along said highway to the Crazy Woman Canyon Road (Johnson County Road 14); easterly along said road to Wyoming Highway 196; northerly along said highway to the Trabing Road (Johnson County Road 13); easterly along said road to Interstate Highway 25.

Area 21. Middle Fork. Beginning at the town of Kaycee and Interstate Highway 25; southeasterly along said highway to the Midwest interchange and the Smoky Gap Road (Natrona County Road 115); westerly along said road to the Dead Horse Road (Natrona County Road 114); southwesterly along said road to the Wild Horse Trail (Natrona County Road 113); westerly along said road to the 33 Mile Road (Natrona County Road 110); northwesterly along said road to the Hazelton Road (Washakie County Road 81); northerly along said road to the Barnum Mountain Road; easterly along said road to the town of Barnum and Wyoming Highway 190; northeasterly along said highway to Wyoming Highway 191; easterly along said highway to Interstate Highway 25.

Area 22. Crazy Woman. Beginning where Interstate Highway 90 crosses the Powder River; southerly up said river to Wyoming Highway 192; westerly along said highway to Interstate Highway 25; northerly along said highway to Interstate Highway 90; southeasterly along said highway to the Powder River.

Area 23. Pumpkin Buttes. Beginning at the junction of U.S. Highway 14-16 and Wyoming Highway 59 at the city of Gillette; southerly along Wyoming Highway 59 to Wyoming Highway 387 at Reno Junction; southwesterly along Wyoming Highway 387 to Wyoming Highway 192; northwesterly along said highway to the Powder River at Sussex; northerly down said river to Interstate Highway 90; easterly along said highway to U.S. Highway 14-16 at the city of Gillette; easterly along said highway to Wyoming Highway 59.

Area 24. Thunder Basin. Beginning where Interstate Highway 90 crosses the Belle Fourche River; southwesterly up said river to the divide between Four Horse Creek and Raven Creek; southeasterly along said divide to the divide between the Cheyenne River and Belle Fourche River Divide; southwesterly along said divide to Newel Prong; southerly down said prong to Bacon Creek; southerly down said creek to Black Thunder Creek; westerly up said creek to the Keeline Road (U.S.F.S. Road 930); southeasterly along said road to Wyoming Highway 450; westerly along said highway to Wyoming Highway 59; northerly along said highway to Interstate Highway 90; easterly along said highway to the Belle Fourche River.

Area 25. Ormsby. Beginning where Wyoming Highway 259 intersects Wyoming Highway 387 at the town of Midwest; northeasterly along Wyoming Highway 387 to the top of Pine Ridge; southerly along Pine Ridge to the head of Sand Creek; southeasterly down said creek to the 55 Ranch Road (Converse County Road 23); southerly along said road to Wyoming Highway 95; southwesterly along said highway to the North Platte River; westerly up said river to Interstate Highway 25 in the city of Casper; northerly along said highway to Wyoming Highway 259; easterly along said highway to Wyoming Highway 387 at the town of Midwest.

Area 26. Bear Creek. Beginning where Wyoming Highway 387 intersects Wyoming Highway 59 at Reno Junction; southerly along Wyoming Highway 59 to the Highland Loop Road (Converse County Road 32); westerly along said road to its junction with Wyoming Highway 93 and the Ross-Highland Loop Cutoff Road; westerly along said cutoff road to its junction with the Ross Road (Converse County Road 31) and the Blizzard Heights-Sage Creek Divide Road; westerly along said divide road to the 55 Ranch Road (Converse County Road 23); southerly along said road to Sand Creek; northwesterly up said creek to the top of Pine Ridge; northerly along the top of Pine Ridge to Wyoming Highway 387; northeasterly along said highway to Wyoming Highway 59 at Reno Junction.

Area 27. Bill. Beginning at the junction of Wyoming Highways 59 and 450; easterly along Wyoming Highway 450 to the Lynch Road (Weston County Road 7A); southerly along said road to the Weston-Converse county line and the Clareton Road (Converse County Road 39); southerly along said road to the Dull Center Road (Converse County Road 38); westerly along said road to the Rochelle Hills Road (U.S.F.S. Road 933); northerly along said road to the Cheyenne River; westerly up said river to its confluence with Antelope Creek and the Dry Fork of the Cheyenne River; southwesterly up the Dry Fork of the Cheyenne River to Wyoming Highway 59; northerly along said highway to the junction of Wyoming Highways 59 and 450.

Area 28. Sage Creek. Beginning at the junction of the North Platte River and Wyoming Highway 95 at the town of Glenrock; northeasterly along said highway to the 55 Ranch Road (Converse County Road 23); northerly along said road to the Blizzard Heights-Sage Creek Divide Road; easterly along said road to the Ross Road (Converse County Road 31) and the Ross-Highland Loop Cutoff Road; easterly along said cutoff road to Wyoming Highway 93 and Highland Loop Road (Converse County Road 32); easterly along said road to Wyoming Highway 59; southerly along said highway to the North Platte River at the town of Douglas; westerly up said river to Wyoming Highway 95.

Area 29. Shawnee. Beginning where Interstate Highway 25 crosses the North Platte River immediately south of Orin Junction; westerly and northerly up said river to Wyoming Highway 59 at the town of Douglas; northerly along said highway to the Dry Fork of the Cheyenne River; northeasterly down said fork to its confluence with Antelope Creek and the Cheyenne River; easterly down the Cheyenne River to the Rochelle Hills Road (U.S.F.S. Road 933); southerly along said road to the Dull Center Road (Converse County Road 38); easterly along said road to the Converse-Niobrara county line and the North Lance Creek Road (Niobrara County); easterly and southerly along said road to Wyoming Highway 272; southerly along said highway to Wyoming Highway 270; southwesterly along said highway to the town of Lance Creek and Wyoming Highway 271; westerly along said highway to the Twenty Mile Creek Road (Niobrara County); westerly along said road to the Converse-Niobrara County line and the Manning Road (Converse County Road 53); westerly along said road to the Twenty Mile Creek Road (Converse County Road 46); southerly along said road to U.S. Highway 18-20 at the town of Lost Springs; westerly along said highway to Interstate Highway 25 at Orin Junction; southerly along said highway to the North Platte River.

Area 30. La Prele. Beginning where Wyoming Highway 95 crosses the North Platte River at the town of Glenrock; easterly and southerly down said river to the Jackalope Warm Springs and the Esterbrook Highway (Wyoming Highway 94); southerly along said highway to the Esterbrook Road (Converse County Road 5); southerly along said road to the town of Esterbrook and U.S.F.S. Road 633; easterly and southerly along said road to the divide between Soldier Creek and Horseshoe Creek; southerly along said divide to the divide between Horseshoe Creek and the North Laramie River; westerly and northerly along said divide to Blacktail Peak and the head of South Fork Creek tributary to LaBonte Creek; northerly down said creek to U.S.F.S. Road 658; westerly along said road to the Old Fort Fetterman Road (Converse County Road 16); northerly along said road to the divide between Corduroy Creek and Rocky Ford Creek; westerly along said divide to the divide between La Prele Creek and the Little Medicine Bow River; westerly along said divide to the Converse-Albany county line; westerly along said line to the Little Medicine Road (Albany County Road 62); southwesterly along said road to U.S.F.S. Road 660; northwesterly along said road to Curry Creek; northwesterly down said creek to Deer Creek; northerly down said creek to the Stephens Road (Converse County Road 20); northerly along said road to the Deer Creek Road (Converse County Road 19); northerly along said road to Wyoming Highway 95; northerly along said highway to the North Platte River.

Area 31. Hat Six. Beginning where the Casper city limits intersect Wyoming Highway 251 (Casper Mountain Road); easterly and northerly along said city limits to the North Platte River; easterly down said river to Wyoming Highway 95 at the town of Glenrock; southerly along said highway to the Deer Creek Road (Converse County Road 19); southerly along said road to the Stephens Road (Converse County Road 20); southerly along said road to Deer Creek; southerly up said creek to Sawmill Creek; southerly and westerly up said creek to the top of Reno Hill and the divide between Soldier Creek and the West Fork of Deer Creek; westerly along said divide to the divide between the East Fork of Bates Creek and the West Fork of Deer Creek; westerly along said divide to the divide between Kerfoot Creek and the West Fork of Deer Creek; westerly along said divide to the divide between the West Fork of Deer Creek, Kerfoot Creek and Smith Creek; northerly and westerly along said divide to the head of Smith Creek; northerly across Muddy Mountain along the divide of Corral Creek and Otter Creek to the divide

between Red Creek and the Clear Fork of Muddy Creek; northerly along said divide to the Circle Drive Road (Natrona County Road 505); northerly along said road to Wyoming Highway 251; northerly along said highway to the Casper city limits.

Area 32. Bates Creek. Beginning where the Pathfinder Dam crosses the North Platte River; easterly and northerly down said river to the Casper city limits; southerly and easterly along said limits to Wyoming Highway 251 (Casper Mountain Road); southerly along said road to the Circle Drive Road (Natrona County Road 505); southerly along said road to the divide between Red Creek and the Clear Fork of Muddy Creek; southerly along said divide to the divide between Corral Creek and Otter Creek; southerly across Muddy Mountain along said divide to the head of Smith Creek; southerly and easterly to the divide between Smith Creek, Kerfoot Creek and the West Fork of Deer Creek; easterly along said divide to the divide between Kerfoot Creek and the West Fork of Deer Creek; easterly along said divide to the divide between Spruce Creek and the West Fork of Deer Creek; easterly along said divide to the divide between the East Fork of Bates Creek and West Fork of Deer Creek; easterly along said divide to the divide between Soldier Creek and the West Fork of Deer Creek; easterly along said divide to Reno Hill and the head of Sawmill Creek; easterly and northerly down said creek to Deer Creek; southerly up said creek to Curry Creek; southeasterly up said creek to U.S.F.S. Road 660; westerly along said road to the Squaw Spring Trail Road; southwesterly along said road to the divide between the Little Medicine Bow River and Bates Creek; southwesterly along said divide to Wyoming Highway 77; southerly along said highway to the Chalk Mountain Road (BLM Road 3129); westerly and northerly along said road to the Dry Creek Road (Carbon County Road 103); northwesterly along said road to the south fork of Canyon Creek; westerly and northerly down said fork to Canyon Creek; westerly down said creek to the east shore of Pathfinder Reservoir; northeasterly along said east shore to the Pathfinder Dam and the North Platte River.

Area 34. Rock Eagle. Beginning where Wyoming Highway 151 crosses the Wyoming-Nebraska state line; westerly along said highway to U.S. Highway 85 at Bear Mountain Station; northerly along said highway to Wyoming Highway 313; westerly along said highway to Interstate Highway 25; northerly along said highway to the Laramie River; northeasterly down said river to the North Platte River; southeasterly down said river to the Wyoming-Nebraska state line; south along said line to Wyoming Highway 151.

Area 35. Horse Creek. Beginning at the town of Chugwater and Wyoming Highway 313; easterly along said highway to U.S. Highway 85; southwesterly along said highway to Interstate Highway 25; north along said highway to Wyoming Highway 313.

Area 36. Burns. Beginning at the junction of Wyoming Highway 151 and the Wyoming-Nebraska state line; southerly along said line to Interstate Highway 80; westerly along said highway to Interstate Highway 25; northeasterly along said highway to U.S. Highway 85; easterly and northerly along said highway to Wyoming Highway 151; easterly along said highway to the Wyoming-Nebraska state line.

Area 37. Harriman. Beginning at the city of Laramie and Interstate Highway 80; southeasterly along said highway to Interstate Highway 25 at the city of Cheyenne; southerly along said highway to the Wyoming-Colorado state line; west along said line to U.S. Highway 287; northerly along said highway to Interstate Highway 80.

Area 38. Little Bear Creek. Beginning at the junction of Wyoming Highway 34 and Interstate Highway 25, near the city of Wheatland; southerly along said Interstate to Wyoming Highway 211, near the city of Cheyenne; northwesterly along said highway to the McLees Road (Laramie County Road 103-1); northwesterly along said road to the Bell Ranch Road; northwesterly along said road to the Sybille Road (Albany County Road 12); northeasterly along said road to Wyoming Highway 34; northeasterly along said highway to Interstate Highway 25.

Area 39. Bluegrass. Beginning where U.S. Highway 30 crosses the Laramie River; south of the town of Bosler; northeasterly down said river to Interstate Highway 25; north of the city of Wheatland; southerly along said highway to Wyoming Highway 34; southwesterly along said highway to the Sybille Road (Albany County Road 12); southerly and westerly along said road to Wyoming Highway 34; southwesterly along said highway to U.S. Highway 30; northerly along said highway to the Laramie River.

Area 40. East Laramie. Beginning in the city of Laramie and U.S. Highway 30; northerly along said highway to Wyoming Highway 34; northeasterly along said highway to the Sybille Road (Albany County Road 12);

easterly along said road to the Bell Ranch Road; easterly along said road to the McLees Road (Laramie County Road 103); southeasterly along said road to Wyoming Highway 211; southerly along said highway to the Fisher Canyon-Rogers Canyon Road (Laramie County Road 228-Albany County Road 17); westerly along said road to U.S. Highway 30.

Area 41. Laramie Peak. Beginning where the Big Laramie River crosses the Dodge Ranch Road; northerly along said road to the Garrett Road (Albany County Road 713); northerly and westerly along said road to the Fetterman Road (Albany County Road 61); southerly along said road to the Mule Creek Road (Albany County Road 64); northwesterly along said road to Albany County Road 610; northerly along said road to Sheep Creek; northerly up said creek to the southern boundary of the Laramie Peak Division of the Medicine Bow National Forest; northwesterly along said boundary to the Albany-Converse county line; east along said line to LaPrele Creek; southerly up said creek to the divide between LaPrele Creek and the Little Medicine Bow River; easterly along said divide to the divide between Corduroy Creek and Rocky Ford Creek; easterly along said divide to the Fetterman Road (Albany County Road 61); southerly along said road to U.S.F.S. Road 658; easterly along said road to South Fork Creek, tributary to LaBonte Creek; southerly up said creek to the divide between Horseshoe Creek and the North Laramie River; southeasterly along said divide to the head of Friend Creek; southerly down said creek to Bear Creek; easterly down said creek to the North Laramie River; easterly down said river to the Cottonwood Park Road (Albany County Road 71); southerly down said road to its junction with the Palmer Canyon Road (Albany County Road 721); easterly along said road to Ashley Creek; southerly down said creek to Duck Creek; easterly down said creek to the Big Laramie River; southerly and westerly up said river to the Dodge Ranch Road.

Area 42. Laramie Plains. Beginning at the junction of the Marshall Road (Albany County Road 610) and U.S. Highway 30 north of the town of Rock River; northeasterly along said road to the Mule Creek Road (Albany County Road 64); southerly along said road to the Fetterman Road (Albany County Road 61); northerly along said road to the Garrett Road (Albany County Road 713); southeasterly along said road to the Dodge Ranch Road; southerly along said road to the Big Laramie River; southwestly up said river to U.S. Highway 30; northwesterly along said highway to the Marshall Road (Albany County Road 610).

Area 43. Cooper Lake. Beginning at the junction of Wyoming Highway 13 and U.S. Highway 30 north of the town of Rock River; southeasterly along U.S. Highway 30 to Interstate Highway 80; northwesterly along said highway to Rock Creek; northeasterly down said creek to Wyoming Highway 13 west of the town of McFadden; northeasterly along said highway to U.S. Highway 30.

Area 44. South Laramie. Beginning at the city of Laramie and U.S. Highway 287; southerly along said highway to the Wyoming-Colorado state line; west along said line to Wyoming Highway 230; northeasterly along said highway to U.S. Highway 287.

Area 45. West Laramie. Beginning at the city of Laramie and Wyoming Highway 230; southwestly along said highway to the divide between the Laramie River and the North Platte River; northerly along said divide to the divide between the Medicine Bow River and the Laramie River at Medicine Bow Peak; northeasterly along said divide to Deep Creek; northeasterly down said creek to Rock Creek; northeasterly down said creek to Interstate Highway 80 at Arlington; southeasterly along said highway to Wyoming Highway 230.

Area 46. Kyle. Beginning where U. S. Highway 30 intersects Wyoming Highway 72; easterly along U.S. Highway 30 to Wyoming Highway 13; southwestly along said highway to Rock Creek west of the town of McFadden; southwestly up said creek to Interstate Highway 80; northwesterly along said highway to Wyoming Highway 72; northerly along said highway to U.S. Highway 30.

Area 47. Shirley Basin. Beginning at U.S. Highway 30 in the town of Medicine Bow; westerly along said highway to Wyoming Highway 72; northerly along said highway to the Hanna-Leo Road (Carbon County Road 291); northerly along said road to Troublesome Creek; northerly up said creek to the Troublesome Spring Road on Shirley Mountain; northerly along said road to the BLM Fire Camp Road (BLM Road 3115); northwesterly along said road to the Leo-Shirley Basin Road (Carbon County Road 102) at Pryor Flat; northeasterly along said road to the Dry Creek Road (Carbon County Road 103); northerly along said road to the Chalk Mountain Road (BLM Road 3129); easterly along said road to Wyoming Highway 77; northerly along said highway to the divide between Bates Creek and the Little Medicine Bow River; northeasterly along said divide to the Old Medicine Bow Road (Carbon

County Road 97); northerly along said road to the Squaw Springs Trail Road; northerly along said road to U.S.F.S. Road 660; southeasterly along said road to the Little Medicine Road (Albany County Road 62); northeasterly along said road to the south boundary of the Laramie Peak Division of the Medicine Bow Forest; southerly and easterly along said boundary to Sheep Creek; southerly along said creek to its second crossing with the Marshall Road (Albany County Road 610); southerly along said road to U.S. Highway 30; westerly along said highway to the town of Medicine Bow.

Area 48. Leo-Hanna. Beginning at the junction of Wyoming Highway 72 and Interstate Highway 80; westerly along Interstate Highway 80 to the North Platte River; northerly down said river to Canyon Creek; easterly up said creek to the south fork of Canyon Creek; southerly and easterly up said fork to the Dry Creek Road (Carbon County Road 103); southerly along said road to the Leo-Shirley Basin Road (Carbon County Road 102); southwesterly along said road to Pryor Flat and the BLM Fire Camp Road (BLM Road 3115); southeasterly along said road to the Troublesome Spring Road; southerly along said road to Troublesome Creek; southerly along said creek to the Hanna-Leo Road (Carbon County Road 291); southerly along said road to the town of Hanna and Wyoming Highway 72; southerly along said highway to Interstate Highway 80.

Area 50. Elk Mountain. Beginning where Interstate Highway 80 crosses the North Platte River; easterly along said highway to Rock Creek at Arlington; southerly up said creek to Deep Creek; southwesterly up said creek to the divide between the Laramie River and the North Platte River; southerly along said divide to Wyoming Highway 230; southwesterly along said highway to the Wyoming-Colorado state line; west along said line to the North Platte River; northerly down said river to Interstate Highway 80.

Area 51. Big Creek. Beginning where the North Platte River crosses the Wyoming-Colorado state line; west along said line to the Encampment River; northeasterly down said river to the North Platte River; southerly up said river to the Wyoming-Colorado state line.

Area 52. Spring Creek. Beginning where the Continental Divide crosses the Wyoming-Colorado state line; northerly along said divide to the Sage Creek Road (Carbon County Road 401); northerly along said road to Sage Creek; northeasterly down said creek to the North Platte River; southerly up said river to the Encampment River; southwesterly up said river to the Wyoming-Colorado state line; westerly along said line to the Continental Divide.

Area 53. Baggs. Beginning at the junction of Wyoming Highway 789 and the Wyoming-Colorado state line; northerly along said highway to Muddy Creek north of the town of Dad; easterly up said creek to the Muddy Creek Road (BLM Road 3306); easterly along said road to the Miller Hill Road (BLM Road 3328); southeasterly along said road to the McCarty Canyon Road (Carbon County Road 503); northeasterly along said road to the Rawlins City Water Works Road; northerly along said road to Sage Creek below Sage Creek Reservoir; northeasterly down said creek to the Sage Creek Road (Carbon County Road 401); southerly along said road to the Continental Divide at Middlewood Hill; southerly along said divide to the Wyoming-Colorado state line; west along said line to Wyoming Highway 789.

Area 55. Red Rim. Beginning at the city of Rawlins; southerly along Wyoming Highway 71 to the divide along Five Mile Ridge; southwesterly along the divide on Five Mile Ridge and Atlantic Rim to the crossing of the Sulphur Springs Ranch Road over Muddy Creek; westerly down said creek to Wyoming Highway 789; northerly along said highway to Interstate Highway 80; easterly along said highway to the city of Rawlins.

Area 56. Iron Springs. Beginning at the city of Rawlins; easterly along Interstate Highway 80 to the North Platte River; southerly up said river to Sage Creek; southwesterly up said creek to the Sage Creek Road (Carbon County Road 401); northerly along said road to Wyoming Highway 71; northerly along said highway to the city of Rawlins.

Area 57. South Wamsutter. Beginning at the junction of Wyoming Highway 789 and the Wyoming-Colorado state line; westerly along said line to the Cow Creek-Powder Wash Road north of Powder Wash, Colorado; northwesterly along said road to the Bitter Creek Road (Sweetwater County Road 19); northwesterly along said road to Interstate Highway 80; easterly along said highway to Creston Junction and Wyoming Highway 789; southerly along said highway to the Wyoming-Colorado state line.



Area 58. Black Butte-Kenny Rim. Beginning at the junction of Wyoming Highway 430 and the Wyoming-Colorado state line; northwesterly along said highway to Interstate Highway 80 in the town of Rock Springs; easterly along said highway to the Bitter Creek Road (Sweetwater County Road 19); southeasterly along said road to the Carson Springs Junction and the Cow Creek-Powder Wash Road; southeasterly along said road to the Wyoming-Colorado state line; westerly along said line to Wyoming Highway 430.

Area 59. Aspen Mountain. Beginning where Interstate Highway 80 crosses the Green River; easterly along said highway to the town of Rock Springs and Wyoming Highway 430; southeasterly along said highway to the Mud Springs Road (Sweetwater County Road 32); westerly along said road to the Aspen Mountain Road (Sweetwater County Road 27); southerly along said road to the Clay Basin Pipeline Road (Sweetwater County Road 71); southwestly along said road to the Ramsey Ranch Road (Sweetwater County Road 34); westerly along said road to U.S. Highway 191; westerly along said highway to the Ramsey Ranch Road (Sweetwater County Road 34); northerly along said road to the Sage Creek Road (Sweetwater County Road 36); westerly along said road to Sage Creek; westerly down said creek to Flaming Gorge Reservoir; northerly along the east shore of said reservoir to the Green River; northeasterly then northwesterly up said river to Interstate Highway 80.

Area 60. Table Rock. Beginning at the junction of Wamsutter-Crooks Gap Road (Sweetwater County Road 23) and Interstate Highway 80 at the town of Wamsutter; westerly along said highway to Wyoming Highway 377 at Point of Rocks; northerly along said highway to the Nine Mile Road (Sweetwater County Road 15); northerly along said road to the Bar X Road (Sweetwater County Road 21) at the Bar X Ranch; northwesterly along said road to the Oregon Buttes Road (Sweetwater County Road 74); northerly along said road to the Continental Divide Road; northeasterly along said road to the Sand Creek Road; easterly along said road to the Red Creek Road (BLM Road 3219); southeasterly along said road to the Cyclone Ridge Road (BLM Road 3216); easterly along said road to the Bison Basin Road (BLM Road 3221); southerly along said road to the Hadsell Road (BLM Road 3217); easterly along said road to the Osborne Road (BLM Road 3212); easterly along said road to the Wamsutter-Crooks Gap Road (Sweetwater County Road 23); southerly along said road to Interstate Highway 80.

Area 61. Chain Lakes. Beginning at the city of Rawlins; westerly along Interstate Highway 80 to the Wamsutter-Crooks Gap Road (Sweetwater County Road 23); northerly along said road to Crooks Gap and the divide along Green Mountain; southeasterly along said divide to Whiskey Peak and the head of Coal Creek; northeasterly down said creek to U.S. Highway 287; southerly along said highway to the city of Rawlins.

Area 62. South Ferris. Beginning at the city of Rawlins; northerly along U.S. Highway 287 to Muddy Gap Junction and the divide along the Ferris Mountains; southeasterly along said divide to Ferris Peak and the northeast branch of the Continental Divide; southeasterly along said branch to Bradley Peak and the divide along the Seminole Mountains; easterly along said divide to Seminole Dam and the North Platte River; southerly up said river to Interstate Highway 80; westerly along said highway to the city of Rawlins.

Area 63. North Ferris. Beginning at Muddy Gap Junction; northeasterly along Wyoming Highway 220 to the Kortess Road (Natrona County Road 407); southerly along said road to the North Platte River; southerly up said river to Seminole Dam and the divide along the Seminole Mountains; westerly along said divide to Bradley Peak and the northeast branch of the Continental Divide; northwesterly along said divide to Ferris Peak and the divide along the Ferris Mountains; northwesterly along said divide to Muddy Gap Junction.

Area 64. Bison Basin. Beginning at the confluence of the Sweetwater River and Alkali Creek southwest of Sweetwater Station; southeasterly along the divide between Alkali Creek and the Sweetwater River to the northeast branch of the Continental Divide; northeasterly along said divide to the Happy Springs Oil Field Road; southeasterly along said road to the Wamsutter-Crooks Gap Road (Fremont County Road and Sweetwater County Road 23); southerly along said road to the Osborne Road (BLM Road 3212); westerly along said road to the Hadsell Road (BLM Road 3217); westerly along said road to the Bison Basin Road (BLM Road 3221); northerly along said road to the Cyclone Ridge Road (BLM Road 3216); westerly along said road to the Red Creek Road (BLM Road 3219); northwesterly along said road to the Sand Creek Road; westerly along said road to the Continental Divide Road; northeasterly along said road to the Harris Slough Road; northerly along said road to the Three Forks-Atlantic City Road (BLM Road 2317); northwesterly along said road to the Sweetwater River at Phelps-Dodge Bridge; northeasterly down said river to Alkali Creek.

Area 65. South Pass. Beginning at the southwest corner of the Wind River Indian Reservation boundary; easterly along said boundary to U.S. Highway 287; southerly and southeasterly along said highway to the Sweetwater River at Sweetwater Station; westerly up said river to Rock Creek; northwesterly up said creek to Granite Peak and the divide between the Sweetwater River and Wind River drainages; northwesterly along said divide to the Continental Divide; northwesterly along said divide to the southwest corner of the Wind River Indian Reservation boundary.

Area 66. Lander. Beginning where U.S. Highway 287 crosses the south boundary of the Wind River Indian Reservation at the North Popo Agie River; easterly along said boundary to Wyoming Highway 135 (Sand Draw Road); southerly along said highway to U.S. Highway 287; northwesterly and northerly along said highway to the south boundary of the Wind River Indian Reservation.

Area 67. Sand Draw. Beginning where U.S. Highway 20-26 crosses the east boundary of the Wind River Indian Reservation; easterly along said highway to the Castle Gardens Road; southerly along said road to Wyoming Highway 136 (Gas Hills Road); southeasterly along said road to the Ore Road (Fremont County Road); southerly along said road to Beaver Rim; westerly and southerly along said rim to Wyoming Highway 135 (Sand Draw Road); northerly along said highway to the Wind River Indian Reservation boundary; easterly and northerly along said boundary to U.S. Highway 20-26.

Area 68. Split Rock. Beginning at the town of Jeffrey City; northerly along the Ore Road to Beaver Rim; northeasterly along said rim to the divide between Deer Creek and Dry Creek; northeasterly along said divide to the Dry Creek Road (Natrona County Road 321); southeasterly along said road to Wyoming Highway 220; southwesterly along said highway to U.S. Highway 287; southerly along said highway to Coal Creek; southwesterly up said creek to Whiskey Peak and the divide along Green Mountain; northwesterly along said divide to Crooks Gap and the Wamsutter-Crooks Gap Road (Sweetwater County Road 23); northerly along said road to the town of Jeffrey City.

Area 69. South Rattlesnake. Beginning where the Dry Creek Road (Natrona County Road 321) intersects Wyoming Highway 220; northwesterly along said road to the Gas Hills Road (Natrona County Road 212); northeasterly along said road to the divide along the Rattlesnake Mountain range; easterly and southerly along said divide to Wyoming Highway 220 at the top of Alcova Hill; westerly along said highway to the Dry Creek Road (Natrona County Road 321).

Area 70. Kendrick. Beginning at the crossing of the North Platte River by U.S. Highway 20-26 in the city of Casper; southwesterly up said river to the Kortess Road (Natrona County Road 407) below Alcova Dam; northerly along said road to Wyoming Highway 220; westerly along said highway to the divide along the Rattlesnake Mountain range at the top of Alcova Hill; northerly along said divide to the Oregon Trail (Natrona County Road 319) at the top of Ryan Hill; northeasterly along said trail to the Kendrick Canal at the Iron Creek Oil Field; northerly along said canal to U.S. Highway 20-26; easterly along said highway to the North Platte River.

Area 71. East Poison Spider. Beginning where U.S. Highway 20-26 crosses the Kendrick Canal; southerly along said canal to the Poison Spider Road (Natrona County Road 201); westerly along said road to the Oil Camp Road (Natrona County Road 210); northwesterly along said road to U.S. Highway 20-26 at the town of Powder River; southeasterly along said highway to the Kendrick Canal.

Area 72. West Poison Spider. Beginning at the intersection of the Gas Hills Road (Natrona County Road 212) and U.S. Highway 20-26 at the town of Waltman; easterly along said highway to the Oil Camp Road (Natrona County Road 210) at the town of Powder River; southeasterly along said road to the Poison Spider Road (Natrona County Road 201); easterly along said road to the Kendrick Canal; southerly along said canal to the Iron Creek Oil Field and the Oregon Trail (Natrona County Road 319); southwesterly along said trail to the divide along the Rattlesnake Mountain range at the top of Ryan Hill; northerly and westerly along said divide to the Gas Hills Road (Natrona County Road 212); northeasterly along said road to the town of Waltman and U.S. Highway 20-26.

Area 73. North Natrona. Beginning where Interstate Highway 25 intersects U.S. Highway 20-26 in the city of Casper; westerly along U.S. Highway 20-26 to the town of Waltman and the Waltman-Arminto Road

(Natrona County Road 104); northerly along said road to the town of Arminto and the Buffalo Creek Road (Natrona County Road 105); northerly along said road to the E-K Trail; northerly along said trail to the Bighorn Trail; northerly along said trail to the divide between the Middle Fork of the Powder River and North Buffalo Creek; easterly and northerly along said divide to the Big Horn Mountain Road (Natrona County Road 109); northwesterly along said road to the 33 Mile Road (Natrona County Road 110); southeasterly along said road to the Wild Horse Trail (Natrona County Road 113); easterly along said trail to the Dead Horse Road (Natrona County Road 114); northeasterly along said road to the Smoky Gap Road (Natrona County Road 115); easterly along said road to U.S. Highway 387; easterly along said highway to Wyoming Highway 259 at the town of Midwest; southerly along said highway to Interstate Highway 25; southerly along said highway to U.S. Highway 20-26 in the city of Casper.

Area 74. Deer Creek. Beginning where the Castle Gardens Road intersects U.S. Highway 20-26; easterly along said highway to the town of Waltman and the Gas Hills Road (Natrona County Road 212); southwestly along said road to the Dry Creek Road (Natrona County Road 321); southeasterly along said road to the divide between Deer Creek and Dry Creek; southwestly along said divide to Beaver Rim; southwestly along said rim to the Ore Road; northerly along said road to Wyoming Highway 136 (Gas Hills Road); westerly along said road to the Castle Gardens Road; northerly along said road to U.S. Highway 20-26.

Area 75. Badwater. Beginning at the town of Shoshoni and U.S. Highway 20-26; westerly along said highway to the east shoreline of Boysen Reservoir; northerly along said shoreline to Boysen Dam and the Wind River; northerly down said river to Gold Creek (excluding Indian tribal trust lands immediately north of U.S. Highway 20-26 near Boysen Reservoir and northeast of Boysen Dam); easterly up Gold Creek to the divide between Buffalo Creek and Badwater Creek on Copper Mountain; easterly along said divide to the divide between Badwater Creek and the Kirby-Nowater-Nowood Creek drainages; northeasterly then southeasterly along said divide to Cottonwood Pass and the divide between Nowood Creek and Badwater Creek; easterly along said divide to the Devil's Slide Road; easterly along said road to Sioux Pass and the Oakie Trail (Natrona County Road 101); easterly along said trail to the Big Horn Trail; easterly along said trail to the E-K Trail; southerly along said trail to the Buffalo Creek Road (Natrona County Road 105); southerly along said road to the town of Arminto and the Arminto Road (Natrona County Road 104); southerly along said road to the town of Waltman and U.S. Highway 20-26; westerly along said highway to the town of Shoshoni.

Area 76. Copper Mountain. Beginning where Gold Creek intersects the east boundary of the Wind River Indian Reservation; northerly and westerly along said boundary to the Big Horn River; northerly down said river to Walters Draw; easterly up said draw to the divide between Nowater Creek and Kirby Creek; easterly along said divide to the Murphy Dome-Mud Creek Road (BLM Road 1409); northeasterly along said road to the Nowater Stock Drive Road (BLM Road 1404); easterly along said road to the divide between the Nowood River and Nowater Creek; southerly along said divide to Hawks Butte and the divide between the Nowood River/Nowater Creek/Kirby Creek and Badwater Creek; westerly along said divide to the divide between Badwater Creek and Buffalo Creek on Copper Mountain; westerly along said divide to the head of Gold Creek; westerly down said creek to the east boundary of the Wind River Indian Reservation.

Area 77. Fifteen Mile Creek. Beginning at the town of Meeteetse; easterly down the Greybull River to the Big Horn River; southerly up said river to Wyoming Highway 432; westerly along said highway to its junction with Wyoming Highway 431 and U.S. Highway 20; westerly along Wyoming Highway 431 to U.S. Highway 120; northwesterly along U.S. Highway 120 to the town of Meeteetse.

Area 78. McCullough Peaks. Beginning at the junction of U.S. Highway 120 and U.S. Highway 14-16-20 in the town of Cody; northerly along U.S. Highway 120 to the Shoshone River; easterly down said river to the Bighorn River; southerly up said river to the Greybull River; westerly up said river to Bighorn County Road 8; northerly up said road to Wyoming Highway 30; northerly up said highway to U.S. Highway 14-16-20; westerly along said highway to U.S. Highway 120.

Area 79. Crystal Creek. Beginning where U.S. Highway 14 crosses the Big Horn River at the town of Greybull; northerly down said river to the Wyoming-Montana state line; easterly along said line to the Bighorn National Forest boundary; southerly along said boundary to U.S. Highway 14; westerly along said highway to the Big Horn River.

Area 80. Badger Basin. Beginning where the Big Horn River crosses the Wyoming-Montana state line; southerly up said river to the Shoshone River; westerly up said river to the North Fork of the Shoshone River; westerly up said river to the Shoshone National Forest boundary; easterly then northerly along said boundary to Wyoming Highway 296 (Sunlight Road); northerly along said highway to U.S. Highway 212; easterly along said highway to the Wyoming-Montana state line; east along said line to the Big Horn River.

Area 81. South Fork. Beginning where the South Fork of Dry Creek crosses Wyoming Highway 120 at the Halfway House historical marker; southwestly up said creek to the divide between Meeteetse Creek and Sage Creek; westerly along said divide to the divide between the Greybull River and the South Fork of the Shoshone River; westerly then southwestly along said divide to the divide between Boulder Creek and Needle Creek; westerly along said divide to the divide between Boulder Creek and the South Fork of the Shoshone River; northerly along said divide to the head of Aspen Creek; northwestly down said creek to the South Fork of the Shoshone River; northeasterly down said river to the Shoshone National Forest boundary; northerly along said boundary to the North Fork of the Shoshone River; easterly down said river to the Shoshone River; easterly along said river to Wyoming Highway 120; southerly along said highway to U.S. Highway 14-16-20; easterly along said highway to Dry Creek; southwestly up said creek to the South Fork of Dry Creek; southwestly up said creek to Wyoming Highway 120 and the Halfway House historical marker.

Area 82. North Greybull River. Beginning where the South Fork of Dry Creek crosses Wyoming Highway 120 at the Halfway House historical marker; northeasterly down said creek to Dry Creek; northeasterly down said creek to U.S. Highway 14-16-20; easterly along said highway to the Wyoming Highway 30 (Burlington Road); southerly along said road to Big Horn County Road 8; southerly along said road to the Greybull River; westerly then southerly along said river to the divide between the Greybull River and the Wind River; northwestly along said divide to the divide between the Greybull River and the South Fork of the Shoshone River; northerly then easterly along said divide to the divide between Meeteetse Creek and Sage Creek; easterly along said divide to the South Fork of Dry Creek; northeasterly down said creek to Wyoming Highway 120 at the Halfway House historical marker.

Area 83. Owl Creek. Beginning where the Big Horn River leaves the Wind River Indian Reservation and the reservation boundary; westerly then northerly along said boundary to Owl Creek and the north boundary of the Wind River Indian Reservation; westerly along said boundary to the divide between Owl Creek/Cottonwood Creek/Grass Creek and Wood River/Gooseberry Creek; northeasterly along said divide to Wyoming Highway 120; southeasterly down said highway to Wyoming Highway 431; easterly along said highway to the junction with Wyoming Highway 432; easterly along said highway to the Big Horn River; southerly along said river to the Wind River Indian Reservation boundary, in addition, all non-Indian fee title lands in that portion of Hot Springs County within the exterior boundaries of the Wind River Indian Reservation.

Area 84. Wind River. All of the drainage of the Wind River west of the western boundary of the Wind River Indian Reservation including areas of the Spence and Moriarity Wildlife Management Area east of the East Fork of the Wind River.

Area 85. Gros Ventre. Beginning where Flat Creek crosses the National Elk Refuge boundary; northerly along said boundary to the Grand Teton National Park boundary; northerly along said boundary to U.S. Highway 26-287; easterly along said highway to the Continental Divide at Togwotee Pass; southerly along said divide to the Union Pass Road (USFS Road 600); southwestly along said road to the Darwin Ranch Road (USFS Road 620); westerly along said road to the divide between the Green River and the Gros Ventre River; southwestly along said divide to the divide between the Gros Ventre River and the Hoback River at Hodges Peak; westerly along said divide to the divide between Flat Creek and the Hoback River; westerly along said divide to Flat Creek; northerly down said creek to the National Elk Refuge boundary.

Area 86. Hoback. All of the drainage of the Hoback River.

Area 87. Pinedale. Beginning where the East Green River Road (Sublette County Road 23-110) intersects Wyoming Highway 351; northerly along said road to U.S. Highway 191 at Cora Junction; westerly then northerly along said highway to the divide between the Hoback River and the Green River (Hoback Rim); northerly along said divide to the divide between the Hoback River and the Gros Ventre River at Hodges Peak; northeasterly along said

divide to the Darwin Ranch Road (USFS Road 620); easterly along said road to the Union Pass Road (USFS Road 600); northeasterly along said road to the Continental Divide at Union Pass; southerly along said divide to the Middle Fork of Boulder Creek; southwesterly down said creek to Boulder Creek; westerly down said creek to the New Fork River; southwesterly down said river to Wyoming Highway 351; westerly along said highway to the East Green River Road (Sublette County Road 23-110).

Area 88. Beaver. Beginning where the East Green River Road (Sublette County Road 23-110) intersects Wyoming Highway 351; westerly along said highway to the Green River; northerly up said river to Cottonwood Creek; westerly up said creek to South Cottonwood Creek; westerly up said creek to the South Fork of South Cottonwood Creek; westerly up said creek to the divide between the Green River and the Greys River; northerly along said divide to the Hoback Rim; easterly along said rim to U.S. Highway 191; southerly along said highway to the East Green River Road (Sublette County Road 23-110) at the Cora Junction; southerly along said road to Wyoming Highway 351.

Area 89. Piney. Beginning where LaBarge Creek enters the Green River; westerly up said creek to the Greys River Road; northerly up said road to the divide between the Green River and the Greys River; northerly along said divide to the South Fork of South Cottonwood Creek; easterly down said creek to the South Fork of Cottonwood Creek; easterly down said creek to Cottonwood Creek; easterly down said creek to the Green River; southerly down said river to LaBarge Creek.

Area 90. Yellow Point. Beginning where the County Line Road (Sweetwater County Road 52) crosses the Green River; northerly up said river to Wyoming Highway 351; easterly along said highway to the New Fork River; northeasterly up said river to Boulder Creek; easterly up said creek to the Middle Fork of Boulder Creek; northeasterly up said creek to the Continental Divide; southerly along said divide to the Big Sandy River; southerly down said river to the Big Sandy Reservoir Road (Sweetwater County Road 28); westerly along said road to U.S. Highway 191; southerly along said highway to the Eighteen Mile Road (Sweetwater County Road 49); westerly then southerly along said road to the County Line Road (Sweetwater County Road 52); southerly along said road to the Green River.

Area 91. Dry Sandy. Beginning at the town of Farson and U.S. Highway 191; northerly along said highway to the Big Sandy Reservoir Road (Sweetwater County Road 28); easterly along said road to the Big Sandy River at the Big Sandy Reservoir Dam; northerly up said river to the Continental Divide; southeasterly along said divide to Mt. Nystrom; easterly from Mt. Nystrom to Sweetwater Gap and the headwaters of the Sweetwater River; southerly down said river to Wyoming Highway 28; southwesterly along said highway to the town of Farson.

Area 92. Steamboat. Beginning at the junction of Interstate Highway 80 and U.S. Highway 191 in the city of Rock Springs; northerly along U.S. Highway 191 to U.S. Highway 28; northeasterly along U.S. Highway 28 to the Oregon Buttes Road (Sweetwater County Road 74); southerly along said road to the Bar X Road (Sweetwater County Road 21); easterly along said road to the Nine Mile Road (Sweetwater County Road 15) at the Bar X Ranch; southerly along said road to Wyoming Highway 377; southerly along said highway to Point of Rocks and Interstate Highway 80; westerly along said highway to U.S. Highway 191.

Area 93. West Green River. Beginning where the Green River crosses Interstate Highway 80; westerly along said highway to U.S. Highway 30; northwesterly along said highway to the town of Kemmerer and Ham's Fork Creek; northerly up said creek to Commissary Ridge; northerly along said ridge to the head of LaBarge Creek; southeasterly down said creek to the Green River; southeasterly down said river to Interstate Highway 80.

Area 94. Carter Lease. Beginning at the junction of Interstate Highway 80 and U.S. Highway 189; northerly along U.S. Highway 189 to U.S. Highway 30; easterly then southerly along said highway to Interstate Highway 80; westerly along said highway to U.S. Highway 189.

Area 95. Cedar Mountain. Beginning where the Flaming Gorge Reservoir crosses the Wyoming-Utah state line; west along said line to the Hoop Lake-Hole-in-the-Rock Road (Uinta County Road 295); northerly along said road to Wyoming Highway 414 at the town of Lone Tree; northerly along said highway to Interstate Highway 80; easterly along said highway to the Green River; southerly down said river to Flaming Gorge Reservoir; southerly along the east shore of Flaming Gorge Reservoir to the Wyoming-Utah state line.

Area 96. West Farson. Beginning where the Green River crosses Interstate Highway 80; northerly up said river to the CCC Bridge and the County Line Road (Sweetwater County Road 52); northerly along said road to the Eighteen Mile Road (Sweetwater County Road 49); northerly then easterly along said road to U.S. Highway 191; southerly along said highway to Interstate Highway 80; westerly along said highway to the Green River.

Area 97. Boysen. All lands within the Bureau of Reclamation's Riverton and Boysen Unit boundaries and those lands within Boysen State Park south of Cottonwood Creek and west of Boysen Reservoir and those lands within Boysen State Park south of U.S. Highway 20-26.

Area 98. Sage. Beginning at the town of Kemmerer and U.S. Highway 30; westerly along said highway to Wyoming Highway 89 at Sage Junction; southwestly along said highway to the Wyoming-Utah state line; northerly along said line to the Wyoming-Idaho state line; northerly along said line to the divide between the Salt River and Bear River; easterly along said divide to the divide between the Salt River and Smith's Fork; northeasterly along said divide to the divide between the Smith's Fork and Greys River; southeasterly along said divide to Commissary Ridge; southerly along said ridge to the head of the Ham's Fork Creek; southerly down said creek to U.S. Highway 30.

Area 99. Uinta. Beginning where Interstate Highway 80 crosses the Wyoming-Utah state line; easterly along said highway to Wyoming Highway 414; southerly along said highway through the town of Lone Tree to the Hoop Lake-Hole-in-the-Rock Road (Uinta County Road 295); southerly along said road to the Wyoming-Utah state line; westerly then northerly along said line to Interstate Highway 80.

Area 100. Bear River Divide. Beginning where Interstate Highway 80 crosses the Wyoming-Utah state line; northerly along said line to Wyoming Highway 89 west of Sage Junction; easterly along said highway to U.S. Highway 30; easterly along said highway to U.S. Highway 189; southerly along said highway to Interstate Highway 80; westerly along said highway to the Wyoming-Utah state line.

Area 102. Buffalo. Beginning where Interstate Highway 90 crosses Piney Creek; southerly along said highway to Interstate Highway 25; southerly along said highway to the Trabing Road (Johnson County Road 13); westerly along said road to Wyoming Highway 196; southerly along said highway to the Crazy Woman Canyon Road (Johnson County Road 14); westerly along said road to U.S. Highway 16; westerly along said highway to the divide along the Big Horn Mountain range at Powder River Pass; northerly along said divide to South Piney Creek; northeasterly down said creek to Piney Creek; southeasterly down said creek to Interstate Highway 90.

Area 103. Dwyer. Beginning at the confluence of the North Platte River and the Laramie River southwest of Ft. Laramie; westerly up the Laramie River to Duck Creek; westerly up said creek to Ashley Creek; northerly up said creek to the Palmer Canyon Road (Albany County Road 721); westerly along said road to its junction with the Cottonwood Park Road (Albany County Road 71); northerly along said road to the North Laramie River; westerly up said river to Bear Creek; northerly up said creek to Friend Creek; northerly up said creek to the divide between Horseshoe Creek and the North Laramie River; northerly along said divide to the divide between Horseshoe Creek and Soldier Creek; northerly along said divide to U.S.F.S. Road 633; northerly and westerly along said road to the town of Esterbrook and the Esterbrook Road (Converse County Road 5); northerly along said road to the Esterbrook Highway (Wyoming Highway 94); northerly along said highway to the North Platte River at Jackalope Warm Springs; easterly and southerly down said river to the Laramie River.

Area 104. Crow Creek. Beginning in the city of Laramie and the Rogers Canyon-Fisher Canyon Road (Albany County Road 17-Laramie County Road 228); northeasterly along said road to Wyoming Highway 211 (Horse Creek-Chugwater Road); southeasterly along said highway to Interstate Highway 25; southerly along said highway to Interstate Highway 80; westerly along said highway to the city of Laramie.

Area 106. Long Creek. Beginning at the town of Jeffrey City; southerly along the Crooks Gap Road to the Happy Springs Oil Field Road; northwesterly along said road to the northeast branch of the Continental Divide; southwestly along said divide to the divide between Alkali Creek and the Sweetwater River; northwesterly along said divide to the confluence of Alkali Creek and the Sweetwater River; northeasterly down said river to U.S. Highway 287; northwesterly along said highway to Wyoming Highway 135 (Sand Draw Road); northerly along said

highway to Beaver Rim; easterly along said rim to the Ore Road; southerly along said road to the town of Jeffrey City.

Area 107. Upper Sweetwater. Beginning at the intersection of Wyoming Highway 28 and the Sweetwater River; northwesterly up said river to the divide between the Sweetwater River and the Wind River; southeasterly along said divide to Granite Peak and the head of Rock Creek; southeasterly down said creek to the Sweetwater River; westerly up said river to the Phelps-Dodge Bridge and the Three Forks-Atlantic City Road (BLM Road 2317); southerly along said road to the Harris Slough Road; southerly along said road to the Continental Divide Road northeast of Continental Peak; westerly along said road to the Oregon Buttes Road; northerly along said road to Wyoming Highway 28; northeasterly along said highway to the Sweetwater River.

Area 108. Bridger Pass. Beginning where Wyoming Highway 71 crosses Five Mile Ridge south of the city of Rawlins; southerly along said highway to the Sage Creek Road (Carbon County Road 401); southerly along said road to Sage Creek; southwesterly up said creek to the Rawlins City Water Works Road below Sage Creek Reservoir; southerly along said road to the McCarty Canyon Road (Carbon County Road 503); southwesterly along said road to the Miller Hill Road (BLM Road 3328); northwesterly along said road to the Muddy Creek Road (BLM Road 3306); westerly along said road to Muddy Creek; westerly down said creek to the Sulphur Springs Ranch Road crossing; northeasterly from said crossing along the divide on Atlantic Rim and Five Mile Ridge to Wyoming Highway 71.

Area 109. Beckton. Beginning where Interstate Highway 90 crosses the Wyoming-Montana state line; southerly along said highway to Piney Creek; northwesterly up said creek to South Piney Creek; westerly up said creek to the Bighorn National Forest boundary; northwesterly along said boundary to the Wyoming-Montana state line; easterly along said line to Interstate Highway 90.

Area 110. South Greybull River. All of the drainage of the Greybull River south of the Greybull River and west of Wyoming Highway 120; all of the drainage of Gooseberry Creek west of Wyoming Highway 120.

Area 111. Chalk Bluffs. Beginning at the junction of Interstate Highway 80 and the Wyoming-Nebraska state line; southerly along said line to where the Wyoming-Nebraska-Colorado state lines intersect; westerly along the Wyoming-Colorado state line to Interstate Highway 25; northerly along said highway to Interstate Highway 80; easterly along said highway to the Wyoming-Nebraska state line.

Area 112. Pine Mountain. Beginning where Wyoming Highway 430 crosses the Wyoming-Colorado state line; west along said line to Flaming Gorge Reservoir; northerly along the east shore of said reservoir to Sage Creek; easterly up said creek to Sage Creek Road (Sweetwater County Road 36); easterly along said road to Ramsey Ranch Road (Sweetwater County Road 34); southerly along said road to U.S. Highway 191; easterly along said highway to Ramsey Ranch Road (Sweetwater County Road 34); easterly along said road to Clay Basin Pipeline Road (Sweetwater County Road 71); northeasterly along said road to Aspen Mountain Road (Sweetwater County Road 27); northerly along said road to Mud Springs Road (Sweetwater County Road 32); northeasterly along said road to Wyoming Highway 430; southerly along said highway to the Wyoming-Colorado state line.

Area 113. Salt Creek. Beginning at the junction of Wyoming Highway 192 and Wyoming Highway 387; southwesterly along Wyoming Highway 387 to Interstate Highway 25; northwesterly along said highway to Wyoming Highway 192; easterly and southerly along said highway to Wyoming Highway 387.

Area 114. Nowater. Beginning at the confluence of Walters Draw and the Bighorn River; northerly down said river to the Nowood River; southeasterly up said river to U.S. Highway 16; westerly along said highway to the Blue Bank Road (BLM Road 1411); southerly along said road to the Nowater Stock Drive Road (BLM Road 1404); westerly along said road to the Murphy Dome-Mud Creek Road (BLM Road 1409); southwesterly along said road to the divide between Nowater Creek and Kirby Creek; westerly along said divide to the head of Walters Draw; westerly down said draw to the Bighorn River.

Area 115. Upper Nowood. Beginning at the junction of the Blue Bank Road and U.S. Highway 16; easterly along said highway to the Canyon Creek Road (U.S.F.S. Road 25); southerly along said road to the Gold Mine Road (U.S.F.S. Road 452); southerly along said road to the Hazelton Road (Johnson County Road 3);

southerly along said road to the Big Horn Mountain Road (Natrona County Road 109); southerly along said road to the Big Horn Trail; westerly along said trail to the Oakie Road (Natrona County Road 101); westerly along said road to Sioux Pass and the divide between the Nowood River and Badwater Creek; westerly then northerly along said divide to Hawks Butte and the divide between the Nowood River and Nowater Creek; northerly along said divide to the Nowater Stock Drive Road (BLM Road 1404); northeasterly along said road to the Blue Bank Road (BLM Road 1411); northerly along said road to U.S. Highway 16.

Area 116. Manderson. Beginning at the junction of the Nowood River and the Big Horn River; northerly down said river to U.S. Highway 14 at the town of Greybull; easterly along said highway to the Bighorn National Forest boundary; easterly and southerly along said boundary to U.S. Highway 16; southwesterly along said highway to the Nowood River; northwesterly down said river to the Big Horn River at the town of Manderson.

Area 117. Crowheart Butte. All non-Indian owned fee title lands within the exterior boundaries of the Wind River Indian Reservation; excluding Antelope Hunt Area 97, those areas of the Spence and Moriarity Wildlife Management Area that lie east of the East Fork of the Wind River, and those lands within Hot Springs County.

#### WYOMING GAME AND FISH COMMISSION

By:

Bill Williams, DVM, President

Dated: April 24, 2007



Note:  Wilderness area, nonresidents must have guides.



TABLE I  
MULE DEER  
HARVEST STATEWIDE  
BY TOTAL HUNTERS  
2007

|             | LICENSES<br>SOLD | NUMBER<br>ACTIVE<br>HUNTERS | HARVEST |       |      |        | TOTAL<br>RECREATION<br>DAYS | HUNTER<br>SUCCESS | DAYS/<br>HARVEST |
|-------------|------------------|-----------------------------|---------|-------|------|--------|-----------------------------|-------------------|------------------|
|             |                  |                             | BUCK    | DOE   | FAWN | TOTAL  |                             |                   |                  |
| STATE TOTAL | 91,789           | 65,503                      | 31,480  | 8,986 | 640  | 41,106 | 328,020                     | 62.8%             | 8.0              |
| RESIDENT    | 55,795           | 38,389                      | 16,748  | 4,712 | 356  | 21,816 | 207,169                     | 56.8%             | 9.5              |
| NONRESIDENT | 35,994           | 27,114                      | 14,732  | 4,274 | 284  | 19,290 | 120,851                     | 71.1%             | 6.3              |

MULE DEER  
HARVEST BY HARVEST TOOL  
2007

|                  |                   |                        |
|------------------|-------------------|------------------------|
| ARCHERY<br>3.82% | FIREARM<br>95.68% | MUZZLE LOADER<br>0.50% |
|------------------|-------------------|------------------------|

TABLE II  
**WHITE-TAILED DEER**  
**HARVEST STATEWIDE**  
 BY TOTAL HUNTERS  
**2007**

|             | LICENSES<br>SOLD | NUMBER<br>ACTIVE<br>HUNTERS | HARVEST |       |      |        | TOTAL<br>RECREATION<br>DAYS | HUNTER<br>SUCCESS | DAYS/<br>HARVEST |
|-------------|------------------|-----------------------------|---------|-------|------|--------|-----------------------------|-------------------|------------------|
|             |                  |                             | BUCK    | DOE   | FAWN | TOTAL  |                             |                   |                  |
| STATE TOTAL | 91,789           | 25,008                      | 7,975   | 5,109 | 871  | 13,955 | 113,668                     | 55.8%             | 8.1              |
| RESIDENT    | 55,795           | 15,705                      | 4,688   | 3,079 | 553  | 8,320  | 81,280                      | 53.0%             | 9.8              |
| NONRESIDENT | 35,994           | 9,303                       | 3,287   | 2,030 | 318  | 5,635  | 32,388                      | 60.6%             | 5.7              |

**WHITE-TAILED DEER**  
**HARVEST BY HARVEST TOOL**  
**2007**

|                  |                   |                        |
|------------------|-------------------|------------------------|
| ARCHERY<br>7.49% | FIREARM<br>91.51% | MUZZLE LOADER<br>1.00% |
|------------------|-------------------|------------------------|

TABLE III  
**TOTAL DEER  
HARVEST STATEWIDE**  
BY TOTAL HUNTERS  
**2007**

|             | LICENSES<br>SOLD | NUMBER<br>ACTIVE<br>HUNTERS | HARVEST |        |       |        | TOTAL<br>RECREATION<br>DAYS | HUNTER<br>SUCCESS | DAYS/<br>HARVEST |
|-------------|------------------|-----------------------------|---------|--------|-------|--------|-----------------------------|-------------------|------------------|
|             |                  |                             | BUCK    | DOE    | FAWN  | TOTAL  |                             |                   |                  |
| STATE TOTAL | 91,789           | 77,307                      | 39,455  | 14,095 | 1,511 | 55,061 | 403,857                     | 71.2%             | 7.3              |
| RESIDENT    | 55,795           | 46,383                      | 21,436  | 7,791  | 909   | 30,136 | 266,227                     | 65.0%             | 8.8              |
| NONRESIDENT | 35,994           | 30,924                      | 18,019  | 6,304  | 602   | 24,925 | 137,630                     | 80.6%             | 5.5              |

TABLE IV  
**STATEWIDE DEER HERD**  
TEN-YEAR COMPARISON OF HARVEST  
**1998–2007**

| YEAR    | 1998   | 1999   | 2000   | 2001   | 2002   | 2003   | 2004   | 2005   | 2006   | 2007   |
|---------|--------|--------|--------|--------|--------|--------|--------|--------|--------|--------|
| HARVEST | 37,026 | 45,570 | 54,377 | 47,943 | 46,796 | 45,710 | 47,466 | 47,599 | 53,925 | 55,061 |

TABLE I-A  
**MULE DEER**  
**HARVEST, HUNTING PRESSURE, HUNTER SUCCESS**  
 BY HUNT AREA  
**2007**

| AREA<br>(cross hunt areas) | TYPE       | ACTIVE<br>LICS/HTRS | HARVEST |     |      |       | HUNTER<br>SUCCESS | DAYS/<br>HARVEST | HUNTER<br>DAYS | LICENSES<br>SOLD<br>(cross hunt<br>incl.) |
|----------------------------|------------|---------------------|---------|-----|------|-------|-------------------|------------------|----------------|-------------------------------------------|
|                            |            |                     | BUCK    | DOE | FAWN | TOTAL |                   |                  |                |                                           |
| 1 Crook                    |            |                     |         |     |      |       |                   |                  |                |                                           |
| (2, 3)                     | D/F Type 6 | 438                 | 0       | 204 | 37   | 241   | 55.0%             | 4.5              | 1073           | 2722                                      |
|                            | General    | 1488                | 614     | 54  | 0    | 668   | 44.9%             | 5.8              | 3874           |                                           |
| Pooled Total               |            | 1847                | 614     | 258 | 37   | 909   | 49.2%             | 5.4              | 4947           |                                           |
| Pooled Resident            |            | 519                 | 197     | 16  | 0    | 213   | 41.0%             | 5.7              | 1218           |                                           |
| Pooled Nonresident         |            | 1328                | 417     | 242 | 37   | 696   | 52.4%             | 5.4              | 3729           |                                           |
| 2 Bearlodge                |            |                     |         |     |      |       |                   |                  |                |                                           |
| (1, 3)                     | D/F Type 6 | 738                 | 0       | 338 | 0    | 338   | 45.8%             | 6.8              | 2303           | 2722                                      |
|                            | General    | 2274                | 686     | 46  | 0    | 732   | 32.2%             | 8.3              | 6054           |                                           |
| Pooled Total               |            | 2832                | 686     | 384 | 0    | 1070  | 37.8%             | 7.8              | 8357           |                                           |
| Pooled Resident            |            | 840                 | 142     | 89  | 0    | 231   | 27.5%             | 13.4             | 3097           |                                           |
| Pooled Nonresident         |            | 1992                | 544     | 295 | 0    | 839   | 42.1%             | 6.3              | 5260           |                                           |
| 3 Keyhole                  |            |                     |         |     |      |       |                   |                  |                |                                           |
| (1, 2)                     | D/F Type 6 | 283                 | 0       | 246 | 0    | 246   | 86.9%             | 4.9              | 1211           | 2722                                      |
|                            | General    | 582                 | 250     | 16  | 3    | 269   | 46.2%             | 7.8              | 2098           |                                           |
| Pooled Total               |            | 799                 | 250     | 262 | 3    | 515   | 64.5%             | 6.4              | 3309           |                                           |
| Pooled Resident            |            | 293                 | 96      | 70  | 0    | 166   | 56.7%             | 7.6              | 1262           |                                           |
| Pooled Nonresident         |            | 506                 | 154     | 192 | 3    | 349   | 69.0%             | 5.9              | 2047           |                                           |
| 4 Sand Creek               |            |                     |         |     |      |       |                   |                  |                |                                           |
|                            | D/F Type 6 | 90                  | 0       | 54  | 0    | 54    | 60.0%             | 3.9              | 213            | 324                                       |
|                            | General    | 603                 | 120     | 3   | 3    | 126   | 20.9%             | 13.1             | 1646           |                                           |
| Pooled Total               |            | 651                 | 120     | 57  | 3    | 180   | 27.6%             | 10.3             | 1859           |                                           |
| Pooled Resident            |            | 301                 | 62      | 34  | 0    | 96    | 31.9%             | 9.1              | 878            |                                           |
| Pooled Nonresident         |            | 350                 | 58      | 23  | 3    | 84    | 24.0%             | 11.7             | 981            |                                           |
| 5 Inyan Kara               |            |                     |         |     |      |       |                   |                  |                |                                           |
|                            | D/F Type 6 | 84                  | 0       | 60  | 5    | 65    | 77.4%             | 3.5              | 230            | 112                                       |
|                            | General    | 456                 | 201     | 17  | 2    | 220   | 48.2%             | 7.7              | 1685           |                                           |
| Pooled Total               |            | 506                 | 201     | 77  | 7    | 285   | 56.3%             | 6.7              | 1915           |                                           |
| Pooled Resident            |            | 268                 | 95      | 34  | 5    | 134   | 50.0%             | 8.9              | 1189           |                                           |
| Pooled Nonresident         |            | 238                 | 106     | 43  | 2    | 151   | 63.4%             | 4.8              | 726            |                                           |
| 6 Skull Creek              |            |                     |         |     |      |       |                   |                  |                |                                           |
| (9)                        | D/F Type 6 | 139                 | 0       | 69  | 7    | 76    | 54.7%             | 5.4              | 407            | 233                                       |
|                            | General    | 640                 | 304     | 29  | 4    | 337   | 52.7%             | 7.0              | 2354           |                                           |
| Pooled Total               |            | 710                 | 304     | 98  | 11   | 413   | 58.2%             | 6.7              | 2761           |                                           |
| Pooled Resident            |            | 392                 | 177     | 44  | 3    | 224   | 57.1%             | 6.7              | 1490           |                                           |
| Pooled Nonresident         |            | 318                 | 127     | 54  | 8    | 189   | 59.4%             | 6.7              | 1271           |                                           |
| 7 South Osage              |            |                     |         |     |      |       |                   |                  |                |                                           |
|                            | General    | 312                 | 166     | 28  | 0    | 194   | 62.2%             | 5.0              | 976            |                                           |
| Pooled Total               |            | 312                 | 166     | 28  | 0    | 194   | 62.2%             | 5.0              | 976            |                                           |
| Pooled Resident            |            | 103                 | 24      | 14  | 0    | 38    | 36.9%             | 6.8              | 258            |                                           |
| Pooled Nonresident         |            | 209                 | 142     | 14  | 0    | 156   | 74.6%             | 4.6              | 718            |                                           |
| 8 Upton-Four Horse         |            |                     |         |     |      |       |                   |                  |                |                                           |
|                            | D/F Type 6 | 64                  | 0       | 55  | 0    | 55    | 85.9%             | 6.0              | 328            | 96                                        |
|                            | General    | 264                 | 143     | 15  | 0    | 158   | 59.8%             | 6.8              | 1068           |                                           |
| Pooled Total               |            | 298                 | 143     | 70  | 0    | 213   | 71.5%             | 6.6              | 1396           |                                           |
| Pooled Resident            |            | 94                  | 44      | 0   | 0    | 44    | 46.8%             | 8.5              | 374            |                                           |
| Pooled Nonresident         |            | 204                 | 99      | 70  | 0    | 169   | 82.8%             | 6.0              | 1022           |                                           |
| 9 Blacktail Creek          |            |                     |         |     |      |       |                   |                  |                |                                           |
| (6)                        | D/F Type 6 | 28                  | 0       | 14  | 0    | 14    | 50.0%             | 10.6             | 149            | 233                                       |
|                            | General    | 245                 | 143     | 15  | 0    | 158   | 64.5%             | 5.8              | 923            |                                           |
| Pooled Total               |            | 261                 | 143     | 29  | 0    | 172   | 65.9%             | 6.2              | 1072           |                                           |
| Pooled Resident            |            | 87                  | 37      | 11  | 0    | 48    | 55.2%             | 9.4              | 453            |                                           |
| Pooled Nonresident         |            | 174                 | 106     | 18  | 0    | 124   | 71.3%             | 5.0              | 619            |                                           |

TABLE I-A (Continued)  
**MULE DEER** HUNT AREA REPORT

| AREA<br>(cross hunt areas)                | TYPE               | ACTIVE<br>LICS/HTRS | HARVEST |     |      |       | HUNTER<br>SUCCESS | DAYS/<br>HARVEST | HUNTER<br>DAYS | LICENSES<br>SOLD<br>(cross hunt<br>incl.) |
|-------------------------------------------|--------------------|---------------------|---------|-----|------|-------|-------------------|------------------|----------------|-------------------------------------------|
|                                           |                    |                     | BUCK    | DOE | FAWN | TOTAL |                   |                  |                |                                           |
| 10 Teckla                                 |                    |                     |         |     |      |       |                   |                  |                |                                           |
|                                           | D/F Type 6         | 29                  | 0       | 16  | 5    | 21    | 72.4%             | 4.1              | 86             | 32                                        |
|                                           | General            | 250                 | 104     | 0   | 0    | 104   | 41.6%             | 8.6              | 898            |                                           |
|                                           | Pooled Total       | 261                 | 104     | 16  | 5    | 125   | 47.9%             | 7.9              | 984            |                                           |
|                                           | Pooled Resident    | 143                 | 37      | 0   | 0    | 37    | 25.9%             | 14.6             | 541            |                                           |
|                                           | Pooled Nonresident | 118                 | 67      | 16  | 5    | 88    | 74.6%             | 5.0              | 443            |                                           |
| 11 Mule Creek                             |                    |                     |         |     |      |       |                   |                  |                |                                           |
|                                           | D/F Type 6         | 100                 | 0       | 85  | 0    | 85    | 85.0%             | 3.9              | 332            | 134                                       |
|                                           | General            | 277                 | 167     | 7   | 4    | 178   | 64.3%             | 5.3              | 939            |                                           |
|                                           | Pooled Total       | 342                 | 167     | 92  | 4    | 263   | 76.9%             | 4.8              | 1271           |                                           |
|                                           | Pooled Resident    | 51                  | 22      | 9   | 0    | 31    | 60.8%             | 3.7              | 115            |                                           |
|                                           | Pooled Nonresident | 291                 | 145     | 83  | 4    | 232   | 79.7%             | 5.0              | 1156           |                                           |
| 12 Hat Creek<br>(13, 14)                  |                    |                     |         |     |      |       |                   |                  |                |                                           |
|                                           | D/F Type 6         | 181                 | 0       | 130 | 4    | 134   | 74.0%             | 5.1              | 682            | 500                                       |
|                                           | General            | 337                 | 163     | 33  | 0    | 196   | 58.2%             | 6.5              | 1270           |                                           |
|                                           | Pooled Total       | 468                 | 163     | 163 | 4    | 330   | 70.5%             | 5.9              | 1952           |                                           |
|                                           | Pooled Resident    | 101                 | 25      | 58  | 0    | 83    | 82.2%             | 5.7              | 477            |                                           |
|                                           | Pooled Nonresident | 367                 | 138     | 105 | 4    | 247   | 67.3%             | 6.0              | 1475           |                                           |
| 13 Lusk<br>(12, 14)                       |                    |                     |         |     |      |       |                   |                  |                |                                           |
|                                           | D/F Type 6         | 153                 | 0       | 106 | 13   | 119   | 77.8%             | 3.8              | 448            | 500                                       |
|                                           | General            | 648                 | 412     | 44  | 0    | 456   | 70.4%             | 5.3              | 2404           |                                           |
|                                           | Pooled Total       | 771                 | 412     | 150 | 13   | 575   | 74.6%             | 5.0              | 2852           |                                           |
|                                           | Pooled Resident    | 192                 | 90      | 51  | 0    | 141   | 73.4%             | 5.0              | 700            |                                           |
|                                           | Pooled Nonresident | 579                 | 322     | 99  | 13   | 434   | 75.0%             | 5.0              | 2152           |                                           |
| 14 Twenty Mile<br>(12, 13)                |                    |                     |         |     |      |       |                   |                  |                |                                           |
|                                           | D/F Type 6         | 119                 | 0       | 69  | 0    | 69    | 58.0%             | 6.0              | 412            | 500                                       |
|                                           | General            | 467                 | 291     | 24  | 4    | 319   | 68.3%             | 7.2              | 2288           |                                           |
|                                           | Pooled Total       | 560                 | 291     | 93  | 4    | 388   | 69.3%             | 7.0              | 2700           |                                           |
|                                           | Pooled Resident    | 119                 | 47      | 17  | 4    | 68    | 57.1%             | 12.7             | 861            |                                           |
|                                           | Pooled Nonresident | 441                 | 244     | 76  | 0    | 320   | 72.6%             | 5.7              | 1839           |                                           |
| 15 South Keeline                          |                    |                     |         |     |      |       |                   |                  |                |                                           |
|                                           | D/F Type 6         | 14                  | 0       | 11  | 0    | 11    | 78.6%             | 5.0              | 55             | 18                                        |
|                                           | General            | 167                 | 92      | 11  | 0    | 103   | 61.7%             | 5.5              | 564            |                                           |
|                                           | Pooled Total       | 174                 | 92      | 22  | 0    | 114   | 65.5%             | 5.4              | 619            |                                           |
|                                           | Pooled Resident    | 85                  | 35      | 11  | 0    | 46    | 54.1%             | 6.8              | 311            |                                           |
|                                           | Pooled Nonresident | 89                  | 57      | 11  | 0    | 68    | 76.4%             | 4.5              | 308            |                                           |
| 16 Meadowdale/Jay Em                      |                    |                     |         |     |      |       |                   |                  |                |                                           |
|                                           | Limited Type 2     | 21                  | 9       | 4   | 0    | 13    | 61.9%             | 7.1              | 92             | 28                                        |
|                                           | General            | 422                 | 212     | 0   | 0    | 212   | 50.2%             | 6.8              | 1447           |                                           |
|                                           | Pooled Total       | 443                 | 221     | 4   | 0    | 225   | 50.8%             | 6.8              | 1539           |                                           |
|                                           | Pooled Resident    | 293                 | 123     | 4   | 0    | 127   | 43.3%             | 7.6              | 967            |                                           |
|                                           | Pooled Nonresident | 150                 | 98      | 0   | 0    | 98    | 65.3%             | 5.8              | 572            |                                           |
| 17 Northwest Gillette<br>(18, 19, 20, 21) |                    |                     |         |     |      |       |                   |                  |                |                                           |
|                                           | D/F Type 6         | 286                 | 0       | 238 | 11   | 249   | 87.1%             | 4.1              | 1026           | 928                                       |
|                                           | General            | 1077                | 647     | 31  | 0    | 678   | 63.0%             | 6.9              | 4690           |                                           |
|                                           | Pooled Total       | 1310                | 647     | 269 | 11   | 927   | 70.8%             | 6.2              | 5716           |                                           |
|                                           | Pooled Resident    | 607                 | 252     | 154 | 11   | 417   | 68.7%             | 6.4              | 2666           |                                           |
|                                           | Pooled Nonresident | 703                 | 395     | 115 | 0    | 510   | 72.5%             | 6.0              | 3050           |                                           |
| 18 Campbell<br>(17, 19, 20, 21)           |                    |                     |         |     |      |       |                   |                  |                |                                           |
|                                           | D/F Type 6         | 242                 | 0       | 208 | 0    | 208   | 86.0%             | 3.4              | 701            | 928                                       |
|                                           | General            | 1370                | 657     | 47  | 0    | 704   | 51.4%             | 7.2              | 5046           |                                           |
|                                           | Pooled Total       | 1553                | 657     | 255 | 0    | 912   | 58.7%             | 6.3              | 5747           |                                           |
|                                           | Pooled Resident    | 705                 | 187     | 127 | 0    | 314   | 44.5%             | 8.4              | 2629           |                                           |
|                                           | Pooled Nonresident | 848                 | 470     | 128 | 0    | 598   | 70.5%             | 5.2              | 3118           |                                           |

TABLE I-A (Continued)  
**MULE DEER** HUNT AREA REPORT

| AREA<br>(cross hunt areas)            | TYPE                         | ACTIVE<br>LICS/HTRS | HARVEST  |           |         |            | HUNTER<br>SUCCESS | DAYS/<br>HARVEST | HUNTER<br>DAYS | LICENSES<br>SOLD<br>(cross hunt<br>incl.) |
|---------------------------------------|------------------------------|---------------------|----------|-----------|---------|------------|-------------------|------------------|----------------|-------------------------------------------|
|                                       |                              |                     | BUCK     | DOE       | FAWN    | TOTAL      |                   |                  |                |                                           |
| 19 Pumpkin Buttes<br>(17, 18, 20, 21) | D/F Type 6<br>General        | 90<br>390           | 0<br>257 | 83<br>8   | 0<br>0  | 83<br>265  | 92.2%<br>67.9%    | 2.9<br>5.0       | 241<br>1335    | 928                                       |
| Pooled Total                          |                              | 459                 | 257      | 91        | 0       | 348        | 75.8%             | 4.5              | 1576           |                                           |
| Pooled Resident                       |                              | 131                 | 53       | 40        | 0       | 93         | 71.0%             | 5.1              | 471            |                                           |
| Pooled Nonresident                    |                              | 328                 | 204      | 51        | 0       | 255        | 77.7%             | 4.3              | 1105           |                                           |
| 20 Clarkelen<br>(17, 18, 19, 21)      | D/F Type 6<br>General        | 30<br>121           | 0<br>64  | 17<br>2   | 0<br>0  | 17<br>66   | 56.7%<br>54.5%    | 4.6<br>6.4       | 79<br>423      | 928                                       |
| Pooled Total                          |                              | 151                 | 64       | 19        | 0       | 83         | 55.0%             | 6.0              | 502            |                                           |
| Pooled Resident                       |                              | 53                  | 17       | 13        | 0       | 30         | 56.6%             | 4.9              | 147            |                                           |
| Pooled Nonresident                    |                              | 98                  | 47       | 6         | 0       | 53         | 54.1%             | 6.7              | 355            |                                           |
| 21 Thunder Basin<br>(17, 18, 19, 20)  | D/F Type 6<br>General        | 163<br>489          | 0<br>243 | 83<br>49  | 13<br>0 | 96<br>292  | 58.9%<br>59.7%    | 7.2<br>6.6       | 689<br>1913    | 928                                       |
| Pooled Total                          |                              | 614                 | 243      | 132       | 13      | 388        | 63.2%             | 6.7              | 2602           |                                           |
| Pooled Resident                       |                              | 351                 | 112      | 74        | 0       | 186        | 53.0%             | 9.9              | 1840           |                                           |
| Pooled Nonresident                    |                              | 263                 | 131      | 58        | 13      | 202        | 76.8%             | 3.8              | 762            |                                           |
| 22 Douglas<br>(158)                   | Limited Type 1<br>D/F Type 6 | 293<br>149          | 254<br>0 | 15<br>102 | 0<br>0  | 269<br>102 | 91.8%<br>68.5%    | 2.9<br>3.7       | 788<br>379     | 338<br>286                                |
| Pooled Total                          |                              | 391                 | 254      | 117       | 0       | 371        | 94.9%             | 3.1              | 1167           |                                           |
| Pooled Resident                       |                              | 40                  | 7        | 24        | 0       | 31         | 77.5%             | 4.5              | 139            |                                           |
| Pooled Nonresident                    |                              | 351                 | 247      | 93        | 0       | 340        | 96.9%             | 3.0              | 1028           |                                           |
| 23 Clearmont<br>(26)                  | D/F Type 6<br>General        | 520<br>1392         | 0<br>857 | 427<br>61 | 24<br>4 | 451<br>922 | 86.7%<br>66.2%    | 4.4<br>6.3       | 1984<br>5779   | 783                                       |
| Pooled Total                          |                              | 1748                | 857      | 488       | 28      | 1373       | 78.5%             | 5.7              | 7763           |                                           |
| Pooled Resident                       |                              | 693                 | 219      | 203       | 18      | 440        | 63.5%             | 7.2              | 3185           |                                           |
| Pooled Nonresident                    |                              | 1055                | 638      | 285       | 10      | 933        | 88.4%             | 4.9              | 4578           |                                           |
| 24 Sheridan                           | D/F Type 6<br>General        | 335<br>1148         | 0<br>406 | 293<br>69 | 12<br>4 | 305<br>479 | 91.0%<br>41.7%    | 5.1<br>11.7      | 1549<br>5602   | 998                                       |
| Pooled Total                          |                              | 1421                | 406      | 362       | 16      | 784        | 55.2%             | 9.1              | 7151           |                                           |
| Pooled Resident                       |                              | 843                 | 184      | 179       | 16      | 379        | 45.0%             | 12.7             | 4813           |                                           |
| Pooled Nonresident                    |                              | 578                 | 222      | 183       | 0       | 405        | 70.1%             | 5.8              | 2338           |                                           |
| 25 Tongue-Goose                       | General                      | 818                 | 177      | 0         | 0       | 177        | 21.6%             | 24.4             | 4314           |                                           |
| Pooled Total                          |                              | 818                 | 177      | 0         | 0       | 177        | 21.6%             | 24.4             | 4314           |                                           |
| Pooled Resident                       |                              | 484                 | 80       | 0         | 0       | 80         | 16.5%             | 34.1             | 2730           |                                           |
| Pooled Nonresident                    |                              | 334                 | 97       | 0         | 0       | 97         | 29.0%             | 16.3             | 1584           |                                           |
| 26 Ucross<br>(23)                     | D/F Type 6<br>General        | 75<br>719           | 0<br>429 | 56<br>8   | 0<br>5  | 56<br>442  | 74.7%<br>61.5%    | 3.2<br>5.0       | 181<br>2196    | 783                                       |
| Pooled Total                          |                              | 784                 | 429      | 64        | 5       | 498        | 63.5%             | 4.8              | 2377           |                                           |
| Pooled Resident                       |                              | 291                 | 99       | 34        | 5       | 138        | 47.4%             | 5.6              | 768            |                                           |
| Pooled Nonresident                    |                              | 493                 | 330      | 30        | 0       | 360        | 73.0%             | 4.5              | 1609           |                                           |
| 27 Buffalo                            | D/F Type 6<br>General        | 106<br>650          | 0<br>212 | 64<br>34  | 0<br>4  | 64<br>250  | 60.4%<br>38.5%    | 7.1<br>9.2       | 452<br>2308    | 200                                       |
| Pooled Total                          |                              | 712                 | 212      | 98        | 4       | 314        | 44.1%             | 8.8              | 2760           |                                           |
| Pooled Resident                       |                              | 329                 | 43       | 50        | 4       | 97         | 29.5%             | 15.1             | 1460           |                                           |
| Pooled Nonresident                    |                              | 383                 | 169      | 48        | 0       | 217        | 56.7%             | 6.0              | 1300           |                                           |



TABLE I-A (Continued)

## MULE DEER HUNT AREA REPORT

| AREA<br>(cross hunt areas) | TYPE           | ACTIVE<br>LICS/HTRS | HARVEST |     |      |       | HUNTER<br>SUCCESS | DAYS/<br>HARVEST | HUNTER<br>DAYS | LICENSES<br>SOLD<br>(cross hunt<br>incl.) |
|----------------------------|----------------|---------------------|---------|-----|------|-------|-------------------|------------------|----------------|-------------------------------------------|
|                            |                |                     | BUCK    | DOE | FAWN | TOTAL |                   |                  |                |                                           |
| 28 Hunter Mesa             |                |                     |         |     |      |       |                   |                  |                |                                           |
|                            | General        | 497                 | 69      | 0   | 0    | 69    | 13.9%             | 37.2             | 2569           |                                           |
| Pooled Total               |                | 497                 | 69      | 0   | 0    | 69    | 13.9%             | 37.2             | 2569           |                                           |
| Pooled Resident            |                | 310                 | 26      | 0   | 0    | 26    | 8.4%              | 75.0             | 1951           |                                           |
| Pooled Nonresident         |                | 187                 | 43      | 0   | 0    | 43    | 23.0%             | 14.4             | 618            |                                           |
| 29 Johnson                 |                |                     |         |     |      |       |                   |                  |                |                                           |
|                            | D/F Type 6     | 163                 | 0       | 102 | 14   | 116   | 71.2%             | 4.6              | 536            | 259                                       |
|                            | General        | 413                 | 249     | 8   | 0    | 257   | 62.2%             | 5.4              | 1386           |                                           |
| Pooled Total               |                | 537                 | 249     | 110 | 14   | 373   | 69.5%             | 5.2              | 1922           |                                           |
| Pooled Resident            |                | 157                 | 37      | 22  | 5    | 64    | 40.8%             | 9.5              | 605            |                                           |
| Pooled Nonresident         |                | 380                 | 212     | 88  | 9    | 309   | 81.3%             | 4.3              | 1317           |                                           |
| 30 Upper Powder River      |                |                     |         |     |      |       |                   |                  |                |                                           |
|                            | D/F Type 6     | 118                 | 0       | 98  | 0    | 98    | 83.1%             | 5.3              | 524            | 219                                       |
|                            | General        | 394                 | 176     | 35  | 0    | 211   | 53.6%             | 8.2              | 1732           |                                           |
| Pooled Total               |                | 457                 | 176     | 133 | 0    | 309   | 67.6%             | 7.3              | 2256           |                                           |
| Pooled Resident            |                | 147                 | 36      | 42  | 0    | 78    | 53.1%             | 14.2             | 1110           |                                           |
| Pooled Nonresident         |                | 310                 | 140     | 91  | 0    | 231   | 74.5%             | 5.0              | 1146           |                                           |
| 31 Salt Creek              |                |                     |         |     |      |       |                   |                  |                |                                           |
|                            | General        | 72                  | 43      | 0   | 0    | 43    | 59.7%             | 9.0              | 385            |                                           |
| Pooled Total               |                | 72                  | 43      | 0   | 0    | 43    | 59.7%             | 9.0              | 385            |                                           |
| Pooled Resident            |                | 33                  | 11      | 0   | 0    | 11    | 33.3%             | 22.9             | 252            |                                           |
| Pooled Nonresident         |                | 39                  | 32      | 0   | 0    | 32    | 82.1%             | 4.2              | 133            |                                           |
| 32 Beartrap Creek          |                |                     |         |     |      |       |                   |                  |                |                                           |
|                            | General        | 97                  | 54      | 13  | 0    | 67    | 69.1%             | 4.8              | 319            |                                           |
| Pooled Total               |                | 97                  | 54      | 13  | 0    | 67    | 69.1%             | 4.8              | 319            |                                           |
| Pooled Resident            |                | 50                  | 15      | 13  | 0    | 28    | 56.0%             | 5.0              | 141            |                                           |
| Pooled Nonresident         |                | 47                  | 39      | 0   | 0    | 39    | 83.0%             | 4.6              | 178            |                                           |
| 33 Red Fork                |                |                     |         |     |      |       |                   |                  |                |                                           |
|                            | D/F Type 6     | 146                 | 0       | 76  | 9    | 85    | 58.2%             | 7.9              | 674            | 199                                       |
|                            | General        | 793                 | 468     | 39  | 4    | 511   | 64.4%             | 6.9              | 3511           |                                           |
| Pooled Total               |                | 883                 | 468     | 115 | 13   | 596   | 67.5%             | 7.0              | 4185           |                                           |
| Pooled Resident            |                | 168                 | 63      | 26  | 0    | 89    | 53.0%             | 8.2              | 733            |                                           |
| Pooled Nonresident         |                | 715                 | 405     | 89  | 13   | 507   | 70.9%             | 6.8              | 3452           |                                           |
| 34 Natrona                 |                |                     |         |     |      |       |                   |                  |                |                                           |
|                            | Limited Type 1 | 294                 | 226     | 4   | 0    | 230   | 78.2%             | 5.5              | 1271           | 351                                       |
|                            | D/F Type 6     | 134                 | 0       | 99  | 7    | 106   | 79.1%             | 4.4              | 470            | 151                                       |
| Pooled Total               |                | 381                 | 226     | 103 | 7    | 336   | 88.2%             | 5.2              | 1741           |                                           |
| Pooled Resident            |                | 274                 | 166     | 70  | 7    | 243   | 88.7%             | 5.1              | 1241           |                                           |
| Pooled Nonresident         |                | 107                 | 60      | 33  | 0    | 93    | 86.9%             | 5.4              | 500            |                                           |
| 35 Upper Nowood            |                |                     |         |     |      |       |                   |                  |                |                                           |
|                            | General        | 175                 | 87      | 9   | 0    | 96    | 54.9%             | 5.7              | 549            |                                           |
| Pooled Total               |                | 175                 | 87      | 9   | 0    | 96    | 54.9%             | 5.7              | 549            |                                           |
| Pooled Resident            |                | 75                  | 19      | 9   | 0    | 28    | 37.3%             | 8.5              | 237            |                                           |
| Pooled Nonresident         |                | 100                 | 68      | 0   | 0    | 68    | 68.0%             | 4.6              | 312            |                                           |
| 36 Badwater                |                |                     |         |     |      |       |                   |                  |                |                                           |
|                            | General        | 447                 | 245     | 0   | 0    | 245   | 54.8%             | 6.2              | 1514           |                                           |
| Pooled Total               |                | 447                 | 245     | 0   | 0    | 245   | 54.8%             | 6.2              | 1514           |                                           |
| Pooled Resident            |                | 300                 | 152     | 0   | 0    | 152   | 50.7%             | 7.2              | 1090           |                                           |
| Pooled Nonresident         |                | 147                 | 93      | 0   | 0    | 93    | 63.3%             | 4.6              | 424            |                                           |
| 37 Copper Mountain         |                |                     |         |     |      |       |                   |                  |                |                                           |
|                            | Limited Type 1 | 168                 | 126     | 12  | 0    | 138   | 82.1%             | 5.1              | 708            | 179                                       |
|                            | D/F Type 6     | 108                 | 0       | 92  | 4    | 96    | 88.9%             | 3.3              | 312            | 148                                       |
| Pooled Total               |                | 236                 | 126     | 104 | 4    | 234   | 99.2%             | 4.4              | 1020           |                                           |
| Pooled Resident            |                | 177                 | 94      | 80  | 2    | 176   | 99.4%             | 3.9              | 694            |                                           |
| Pooled Nonresident         |                | 59                  | 32      | 24  | 2    | 58    | 98.3%             | 5.6              | 326            |                                           |

TABLE I-A (Continued)

## MULE DEER HUNT AREA REPORT

| AREA<br>(cross hunt areas) | TYPE       | ACTIVE<br>LICS/HTRS | HARVEST |     |      |       | HUNTER<br>SUCCESS | DAYS/<br>HARVEST | HUNTER<br>DAYS | LICENSES<br>SOLD<br>(cross hunt<br>incl.) |
|----------------------------|------------|---------------------|---------|-----|------|-------|-------------------|------------------|----------------|-------------------------------------------|
|                            |            |                     | BUCK    | DOE | FAWN | TOTAL |                   |                  |                |                                           |
| 38 Black Mountain          |            |                     |         |     |      |       |                   |                  |                |                                           |
|                            | General    | 167                 | 71      | 0   | 0    | 71    | 42.5%             | 8.1              | 577            |                                           |
| Pooled Total               |            | 167                 | 71      | 0   | 0    | 71    | 42.5%             | 8.1              | 577            |                                           |
| Pooled Resident            |            | 92                  | 35      | 0   | 0    | 35    | 38.0%             | 9.0              | 315            |                                           |
| Pooled Nonresident         |            | 75                  | 36      | 0   | 0    | 36    | 48.0%             | 7.3              | 262            |                                           |
| 39 Bates Creek             |            |                     |         |     |      |       |                   |                  |                |                                           |
|                            | D/F Type 6 | 40                  | 0       | 24  | 0    | 24    | 60.0%             | 5.0              | 121            | 50                                        |
|                            | General    | 165                 | 73      | 0   | 0    | 73    | 44.2%             | 6.4              | 469            |                                           |
| Pooled Total               |            | 193                 | 73      | 24  | 0    | 97    | 50.3%             | 6.1              | 590            |                                           |
| Pooled Resident            |            | 57                  | 23      | 0   | 0    | 23    | 40.4%             | 5.8              | 133            |                                           |
| Pooled Nonresident         |            | 136                 | 50      | 24  | 0    | 74    | 54.4%             | 6.2              | 457            |                                           |
| 40 Buffalo Creek           |            |                     |         |     |      |       |                   |                  |                |                                           |
|                            | D/F Type 6 | 87                  | 0       | 37  | 8    | 45    | 51.7%             | 7.4              | 335            | 121                                       |
|                            | General    | 258                 | 147     | 10  | 0    | 157   | 60.9%             | 5.3              | 835            |                                           |
| Pooled Total               |            | 306                 | 147     | 47  | 8    | 202   | 66.0%             | 5.8              | 1170           |                                           |
| Pooled Resident            |            | 80                  | 36      | 6   | 0    | 42    | 52.5%             | 5.8              | 243            |                                           |
| Pooled Nonresident         |            | 226                 | 111     | 41  | 8    | 160   | 70.8%             | 5.8              | 927            |                                           |
| 41 Sand Creek              |            |                     |         |     |      |       |                   |                  |                |                                           |
| (45)                       | D/F Type 6 | 121                 | 0       | 80  | 12   | 92    | 76.0%             | 7.7              | 708            | 197                                       |
|                            | General    | 322                 | 102     | 35  | 0    | 137   | 42.5%             | 9.9              | 1357           |                                           |
| Pooled Total               |            | 397                 | 102     | 115 | 12   | 229   | 57.7%             | 9.0              | 2065           |                                           |
| Pooled Resident            |            | 212                 | 41      | 45  | 0    | 86    | 40.6%             | 9.9              | 848            |                                           |
| Pooled Nonresident         |            | 185                 | 61      | 70  | 12   | 143   | 77.3%             | 8.5              | 1217           |                                           |
| 42 Otter Creek             |            |                     |         |     |      |       |                   |                  |                |                                           |
|                            | D/F Type 6 | 147                 | 0       | 105 | 11   | 116   | 78.9%             | 5.7              | 657            | 175                                       |
|                            | General    | 983                 | 434     | 89  | 4    | 527   | 53.6%             | 7.8              | 4124           |                                           |
| Pooled Total               |            | 1050                | 434     | 194 | 15   | 643   | 61.2%             | 7.4              | 4781           |                                           |
| Pooled Resident            |            | 335                 | 126     | 38  | 8    | 172   | 51.3%             | 9.3              | 1591           |                                           |
| Pooled Nonresident         |            | 715                 | 308     | 156 | 7    | 471   | 65.9%             | 6.8              | 3190           |                                           |
| 43 Leigh Creek             |            |                     |         |     |      |       |                   |                  |                |                                           |
|                            | General    | 120                 | 26      | 0   | 0    | 26    | 21.7%             | 22.7             | 591            |                                           |
| Pooled Total               |            | 120                 | 26      | 0   | 0    | 26    | 21.7%             | 22.7             | 591            |                                           |
| Pooled Resident            |            | 41                  | 12      | 0   | 0    | 12    | 29.3%             | 17.7             | 212            |                                           |
| Pooled Nonresident         |            | 79                  | 14      | 0   | 0    | 14    | 17.7%             | 27.1             | 379            |                                           |
| 44 Brokenback Creek        |            |                     |         |     |      |       |                   |                  |                |                                           |
|                            | General    | 146                 | 50      | 9   | 0    | 59    | 40.4%             | 9.4              | 556            |                                           |
| Pooled Total               |            | 146                 | 50      | 9   | 0    | 59    | 40.4%             | 9.4              | 556            |                                           |
| Pooled Resident            |            | 82                  | 10      | 6   | 0    | 16    | 19.5%             | 19.6             | 313            |                                           |
| Pooled Nonresident         |            | 64                  | 40      | 3   | 0    | 43    | 67.2%             | 5.7              | 243            |                                           |
| 45 Paint Rock Creek        |            |                     |         |     |      |       |                   |                  |                |                                           |
| (41)                       | D/F Type 6 | 24                  | 0       | 19  | 2    | 21    | 87.5%             | 4.9              | 103            | 197                                       |
|                            | General    | 244                 | 90      | 17  | 0    | 107   | 43.9%             | 9.5              | 1021           |                                           |
| Pooled Total               |            | 258                 | 90      | 36  | 2    | 128   | 49.6%             | 8.8              | 1124           |                                           |
| Pooled Resident            |            | 123                 | 33      | 7   | 2    | 42    | 34.1%             | 14.4             | 605            |                                           |
| Pooled Nonresident         |            | 135                 | 57      | 29  | 0    | 86    | 63.7%             | 6.0              | 519            |                                           |
| 46 Cloud Peak              |            |                     |         |     |      |       |                   |                  |                |                                           |
|                            | General    | 342                 | 77      | 29  | 0    | 106   | 31.0%             | 13.7             | 1449           |                                           |
| Pooled Total               |            | 342                 | 77      | 29  | 0    | 106   | 31.0%             | 13.7             | 1449           |                                           |
| Pooled Resident            |            | 231                 | 33      | 12  | 0    | 45    | 19.5%             | 23.0             | 1033           |                                           |
| Pooled Nonresident         |            | 111                 | 44      | 17  | 0    | 61    | 55.0%             | 6.8              | 416            |                                           |
| 47 Manderson               |            |                     |         |     |      |       |                   |                  |                |                                           |
| (49)                       | D/F Type 6 | 68                  | 0       | 47  | 12   | 59    | 86.8%             | 3.8              | 227            | 149                                       |
|                            | General    | 373                 | 142     | 33  | 4    | 179   | 48.0%             | 7.6              | 1362           |                                           |
| Pooled Total               |            | 405                 | 142     | 80  | 16   | 238   | 58.8%             | 6.7              | 1589           |                                           |
| Pooled Resident            |            | 250                 | 81      | 61  | 9    | 151   | 60.4%             | 6.7              | 1006           |                                           |
| Pooled Nonresident         |            | 155                 | 61      | 19  | 7    | 87    | 56.1%             | 6.7              | 583            |                                           |

TABLE I-A (Continued)

## MULE DEER HUNT AREA REPORT

| AREA<br>(cross hunt areas)  | TYPE           | ACTIVE<br>LICS/HTRS | HARVEST |     |      |       | HUNTER<br>SUCCESS | DAYS/<br>HARVEST | HUNTER<br>DAYS | LICENSES<br>SOLD<br>(cross hunt<br>incl.) |
|-----------------------------|----------------|---------------------|---------|-----|------|-------|-------------------|------------------|----------------|-------------------------------------------|
|                             |                |                     | BUCK    | DOE | FAWN | TOTAL |                   |                  |                |                                           |
| 49 Trapper Creek            |                |                     |         |     |      |       |                   |                  |                |                                           |
| (47)                        | D/F Type 6     | 53                  | 0       | 41  | 3    | 44    | 83.0%             | 3.9              | 170            | 149                                       |
|                             | General        | 287                 | 124     | 19  | 0    | 143   | 49.8%             | 8.2              | 1170           |                                           |
| Pooled Total                |                | 308                 | 124     | 60  | 3    | 187   | 60.7%             | 7.2              | 1340           |                                           |
| Pooled Resident             |                | 182                 | 46      | 38  | 0    | 84    | 46.2%             | 9.8              | 822            |                                           |
| Pooled Nonresident          |                | 126                 | 78      | 22  | 3    | 103   | 81.7%             | 5.0              | 518            |                                           |
| 50 Upper Shell-Beaver Creek |                |                     |         |     |      |       |                   |                  |                |                                           |
|                             | General        | 245                 | 113     | 9   | 0    | 122   | 49.8%             | 6.8              | 830            |                                           |
| Pooled Total                |                | 245                 | 113     | 9   | 0    | 122   | 49.8%             | 6.8              | 830            |                                           |
| Pooled Resident             |                | 151                 | 49      | 9   | 0    | 58    | 38.4%             | 9.4              | 547            |                                           |
| Pooled Nonresident          |                | 94                  | 64      | 0   | 0    | 64    | 68.1%             | 4.4              | 283            |                                           |
| 51 Beaver Creek             |                |                     |         |     |      |       |                   |                  |                |                                           |
|                             | D/F Type 6     | 162                 | 0       | 134 | 7    | 141   | 87.0%             | 3.8              | 538            | 260                                       |
|                             | General        | 375                 | 179     | 54  | 0    | 233   | 62.1%             | 5.9              | 1382           |                                           |
| Pooled Total                |                | 472                 | 179     | 188 | 7    | 374   | 79.2%             | 5.1              | 1920           |                                           |
| Pooled Resident             |                | 236                 | 64      | 86  | 0    | 150   | 63.6%             | 6.7              | 998            |                                           |
| Pooled Nonresident          |                | 236                 | 115     | 102 | 7    | 224   | 94.9%             | 4.1              | 922            |                                           |
| 52 Crystal Creek            |                |                     |         |     |      |       |                   |                  |                |                                           |
|                             | General        | 148                 | 55      | 0   | 0    | 55    | 37.2%             | 8.0              | 442            |                                           |
| Pooled Total                |                | 148                 | 55      | 0   | 0    | 55    | 37.2%             | 8.0              | 442            |                                           |
| Pooled Resident             |                | 111                 | 35      | 0   | 0    | 35    | 31.5%             | 9.5              | 331            |                                           |
| Pooled Nonresident          |                | 37                  | 20      | 0   | 0    | 20    | 54.1%             | 5.6              | 111            |                                           |
| 53 Devils Canyon            |                |                     |         |     |      |       |                   |                  |                |                                           |
|                             | General        | 425                 | 178     | 4   | 0    | 182   | 42.8%             | 9.2              | 1676           |                                           |
| Pooled Total                |                | 425                 | 178     | 4   | 0    | 182   | 42.8%             | 9.2              | 1676           |                                           |
| Pooled Resident             |                | 331                 | 111     | 4   | 0    | 115   | 34.7%             | 12.0             | 1376           |                                           |
| Pooled Nonresident          |                | 94                  | 67      | 0   | 0    | 67    | 71.3%             | 4.5              | 300            |                                           |
| 55 Rock Eagle               |                |                     |         |     |      |       |                   |                  |                |                                           |
|                             | D/F Type 6     | 122                 | 0       | 77  | 3    | 80    | 65.6%             | 5.8              | 466            | 150                                       |
|                             | General        | 621                 | 263     | 0   | 0    | 263   | 42.4%             | 8.6              | 2263           |                                           |
| Pooled Total                |                | 692                 | 263     | 77  | 3    | 343   | 49.6%             | 8.0              | 2729           |                                           |
| Pooled Resident             |                | 512                 | 175     | 49  | 0    | 224   | 43.8%             | 9.3              | 2089           |                                           |
| Pooled Nonresident          |                | 180                 | 88      | 28  | 3    | 119   | 66.1%             | 5.4              | 640            |                                           |
| 57 Southeast                |                |                     |         |     |      |       |                   |                  |                |                                           |
|                             | General        | 429                 | 150     | 46  | 15   | 211   | 49.2%             | 7.7              | 1634           |                                           |
| Pooled Total                |                | 429                 | 150     | 46  | 15   | 211   | 49.2%             | 7.7              | 1634           |                                           |
| Pooled Resident             |                | 379                 | 131     | 43  | 15   | 189   | 49.9%             | 7.6              | 1431           |                                           |
| Pooled Nonresident          |                | 50                  | 19      | 3   | 0    | 22    | 44.0%             | 9.2              | 203            |                                           |
| 59 Little Bear              |                |                     |         |     |      |       |                   |                  |                |                                           |
|                             | D/F Type 6     | 38                  | 0       | 32  | 0    | 32    | 84.2%             | 4.3              | 138            | 51                                        |
|                             | General        | 128                 | 79      | 0   | 0    | 79    | 61.7%             | 6.6              | 518            |                                           |
| Pooled Total                |                | 150                 | 79      | 32  | 0    | 111   | 74.0%             | 5.9              | 656            |                                           |
| Pooled Resident             |                | 109                 | 59      | 18  | 0    | 77    | 70.6%             | 6.8              | 523            |                                           |
| Pooled Nonresident          |                | 41                  | 20      | 14  | 0    | 34    | 82.9%             | 3.9              | 133            |                                           |
| 60 Pole Mountain            |                |                     |         |     |      |       |                   |                  |                |                                           |
|                             | Limited Type 1 | 93                  | 69      | 0   | 0    | 69    | 74.2%             | 8.4              | 581            | 105                                       |
|                             | Limited Type 2 | 137                 | 83      | 27  | 0    | 110   | 80.3%             | 5.6              | 616            | 157                                       |
|                             | D/F Type 6     | 43                  | 0       | 26  | 0    | 26    | 60.5%             | 6.4              | 166            | 50                                        |
| Pooled Total                |                | 259                 | 152     | 53  | 0    | 205   | 79.2%             | 6.6              | 1363           |                                           |
| Pooled Resident             |                | 211                 | 110     | 51  | 0    | 161   | 76.3%             | 6.9              | 1108           |                                           |
| Pooled Nonresident          |                | 48                  | 42      | 2   | 0    | 44    | 91.7%             | 5.8              | 255            |                                           |
| 61 Harriman                 |                |                     |         |     |      |       |                   |                  |                |                                           |
|                             | General        | 190                 | 52      | 7   | 4    | 63    | 33.2%             | 14.5             | 914            |                                           |
| Pooled Total                |                | 190                 | 52      | 7   | 4    | 63    | 33.2%             | 14.5             | 914            |                                           |
| Pooled Resident             |                | 158                 | 32      | 7   | 4    | 43    | 27.2%             | 18.8             | 808            |                                           |
| Pooled Nonresident          |                | 32                  | 20      | 0   | 0    | 20    | 62.5%             | 5.3              | 106            |                                           |

TABLE I-A (Continued)

## MULE DEER HUNT AREA REPORT

| AREA<br>(cross hunt areas) | TYPE           | ACTIVE<br>LICS/HTRS | HARVEST |     |      |       | HUNTER<br>SUCCESS | DAYS/<br>HARVEST | HUNTER<br>DAYS | LICENSES<br>SOLD<br>(cross hunt<br>incl.) |
|----------------------------|----------------|---------------------|---------|-----|------|-------|-------------------|------------------|----------------|-------------------------------------------|
|                            |                |                     | BUCK    | DOE | FAWN | TOTAL |                   |                  |                |                                           |
| 62 Iron Mountain           |                |                     |         |     |      |       |                   |                  |                |                                           |
| (63, 64)                   | D/F Type 6     | 20                  | 0       | 9   | 0    | 9     | 45.0%             | 10.2             | 92             | 177                                       |
|                            | General        | 114                 | 93      | 0   | 0    | 93    | 81.6%             | 5.8              | 539            |                                           |
| Pooled Total               |                | 134                 | 93      | 9   | 0    | 102   | 76.1%             | 6.2              | 631            |                                           |
| Pooled Resident            |                | 80                  | 58      | 4   | 0    | 62    | 77.5%             | 6.6              | 411            |                                           |
| Pooled Nonresident         |                | 54                  | 35      | 5   | 0    | 40    | 74.1%             | 5.5              | 220            |                                           |
| 63 Richeau                 |                |                     |         |     |      |       |                   |                  |                |                                           |
| (62, 64)                   | D/F Type 6     | 15                  | 0       | 2   | 4    | 6     | 40.0%             | 6.3              | 38             | 177                                       |
|                            | General        | 262                 | 171     | 0   | 0    | 171   | 65.3%             | 5.4              | 921            |                                           |
| Pooled Total               |                | 273                 | 171     | 2   | 4    | 177   | 64.8%             | 5.4              | 959            |                                           |
| Pooled Resident            |                | 122                 | 67      | 2   | 2    | 71    | 58.2%             | 4.9              | 350            |                                           |
| Pooled Nonresident         |                | 151                 | 104     | 0   | 2    | 106   | 70.2%             | 5.7              | 609            |                                           |
| 64 Laramie Peak            |                |                     |         |     |      |       |                   |                  |                |                                           |
|                            | Limited Type 2 | 122                 | 75      | 0   | 0    | 75    | 61.5%             | 7.7              | 576            | 149                                       |
| (62, 63)                   | D/F Type 6     | 107                 | 0       | 63  | 15   | 78    | 72.9%             | 4.8              | 377            | 177                                       |
|                            | General        | 1252                | 712     | 0   | 0    | 712   | 56.9%             | 7.3              | 5200           |                                           |
| Pooled Total               |                | 1439                | 787     | 63  | 15   | 865   | 60.1%             | 7.1              | 6153           |                                           |
| Pooled Resident            |                | 958                 | 467     | 32  | 6    | 505   | 52.7%             | 8.4              | 4243           |                                           |
| Pooled Nonresident         |                | 481                 | 320     | 31  | 9    | 360   | 74.8%             | 5.3              | 1910           |                                           |
| 65 South Converse          |                |                     |         |     |      |       |                   |                  |                |                                           |
|                            | D/F Type 6     | 157                 | 0       | 106 | 7    | 113   | 72.0%             | 5.2              | 583            | 196                                       |
|                            | General        | 1108                | 616     | 0   | 0    | 616   | 55.6%             | 6.9              | 4224           |                                           |
| Pooled Total               |                | 1185                | 616     | 106 | 7    | 729   | 61.5%             | 6.6              | 4807           |                                           |
| Pooled Resident            |                | 539                 | 265     | 21  | 4    | 290   | 53.8%             | 7.2              | 2088           |                                           |
| Pooled Nonresident         |                | 646                 | 351     | 85  | 3    | 439   | 68.0%             | 6.2              | 2719           |                                           |
| 66 Bates Hole-Hat Six      |                |                     |         |     |      |       |                   |                  |                |                                           |
|                            | D/F Type 6     | 167                 | 0       | 121 | 25   | 146   | 87.4%             | 4.1              | 594            | 200                                       |
|                            | General        | 1050                | 512     | 0   | 0    | 512   | 48.8%             | 8.2              | 4191           |                                           |
| Pooled Total               |                | 1163                | 512     | 121 | 25   | 658   | 56.6%             | 7.3              | 4785           |                                           |
| Pooled Resident            |                | 785                 | 310     | 47  | 3    | 360   | 45.9%             | 8.6              | 3112           |                                           |
| Pooled Nonresident         |                | 378                 | 202     | 74  | 22   | 298   | 78.8%             | 5.6              | 1673           |                                           |
| 70 Shirley Mountain        |                |                     |         |     |      |       |                   |                  |                |                                           |
|                            | D/F Type 6     | 71                  | 0       | 54  | 4    | 58    | 81.7%             | 3.9              | 225            | 100                                       |
|                            | General        | 879                 | 511     | 0   | 0    | 511   | 58.1%             | 6.7              | 3406           |                                           |
| Pooled Total               |                | 923                 | 511     | 54  | 4    | 569   | 61.6%             | 6.4              | 3631           |                                           |
| Pooled Resident            |                | 478                 | 210     | 20  | 2    | 232   | 48.5%             | 5.8              | 1340           |                                           |
| Pooled Nonresident         |                | 445                 | 301     | 34  | 2    | 337   | 75.7%             | 6.8              | 2291           |                                           |
| 73 Boswell                 |                |                     |         |     |      |       |                   |                  |                |                                           |
|                            | General        | 289                 | 120     | 0   | 0    | 120   | 41.5%             | 9.6              | 1155           |                                           |
| Pooled Total               |                | 289                 | 120     | 0   | 0    | 120   | 41.5%             | 9.6              | 1155           |                                           |
| Pooled Resident            |                | 174                 | 60      | 0   | 0    | 60    | 34.5%             | 12.1             | 725            |                                           |
| Pooled Nonresident         |                | 115                 | 60      | 0   | 0    | 60    | 52.2%             | 7.2              | 430            |                                           |
| 74 Kyle                    |                |                     |         |     |      |       |                   |                  |                |                                           |
| (75)                       | D/F Type 6     | 3                   | 0       | 2   | 0    | 2     | 66.7%             | 2.0              | 4              | 25                                        |
|                            | General        | 242                 | 105     | 0   | 0    | 105   | 43.4%             | 8.7              | 913            |                                           |
| Pooled Total               |                | 245                 | 105     | 2   | 0    | 107   | 43.7%             | 8.6              | 917            |                                           |
| Pooled Resident            |                | 162                 | 72      | 0   | 0    | 72    | 44.4%             | 8.3              | 599            |                                           |
| Pooled Nonresident         |                | 83                  | 33      | 2   | 0    | 35    | 42.2%             | 9.1              | 318            |                                           |
| 75 Four Mile               |                |                     |         |     |      |       |                   |                  |                |                                           |
| (74)                       | D/F Type 6     | 2                   | 0       | 0   | 0    | 0     | 0.0%              | 0.0              | 19             | 25                                        |
|                            | General        | 717                 | 176     | 0   | 0    | 176   | 24.5%             | 16.7             | 2940           |                                           |
| Pooled Total               |                | 719                 | 176     | 0   | 0    | 176   | 24.5%             | 16.8             | 2959           |                                           |
| Pooled Resident            |                | 591                 | 114     | 0   | 0    | 114   | 19.3%             | 21.4             | 2435           |                                           |
| Pooled Nonresident         |                | 128                 | 62      | 0   | 0    | 62    | 48.4%             | 8.5              | 524            |                                           |

TABLE I-A (Continued)  
**MULE DEER** HUNT AREA REPORT

| LICENSES                   |                |                     |         |     |      |       |                   |                  |                |                               |
|----------------------------|----------------|---------------------|---------|-----|------|-------|-------------------|------------------|----------------|-------------------------------|
| AREA<br>(cross hunt areas) | TYPE           | ACTIVE<br>LICS/HTRS | HARVEST |     |      |       | HUNTER<br>SUCCESS | DAYS/<br>HARVEST | HUNTER<br>DAYS | SOLD<br>(cross hunt<br>incl.) |
|                            |                |                     | BUCK    | DOE | FAWN | TOTAL |                   |                  |                |                               |
| 76 Sheep Mountain          |                |                     |         |     |      |       |                   |                  |                |                               |
|                            | General        | 916                 | 140     | 0   | 0    | 140   | 15.3%             | 27.3             | 3818           |                               |
| Pooled Total               |                | 916                 | 140     | 0   | 0    | 140   | 15.3%             | 27.3             | 3818           |                               |
| Pooled Resident            |                | 747                 | 96      | 0   | 0    | 96    | 12.9%             | 32.8             | 3151           |                               |
| Pooled Nonresident         |                | 169                 | 44      | 0   | 0    | 44    | 26.0%             | 15.2             | 667            |                               |
| 77 Boulder Ridge           |                |                     |         |     |      |       |                   |                  |                |                               |
|                            | General        | 256                 | 44      | 0   | 0    | 44    | 17.2%             | 21.8             | 961            |                               |
| Pooled Total               |                | 256                 | 44      | 0   | 0    | 44    | 17.2%             | 21.8             | 961            |                               |
| Pooled Resident            |                | 201                 | 37      | 0   | 0    | 37    | 18.4%             | 19.9             | 737            |                               |
| Pooled Nonresident         |                | 55                  | 7       | 0   | 0    | 7     | 12.7%             | 32.0             | 224            |                               |
| 78 French Creek            |                |                     |         |     |      |       |                   |                  |                |                               |
| (79, 80, 81)               | Limited Type 2 | 18                  | 16      | 0   | 0    | 16    | 88.9%             | 4.6              | 74             | 27                            |
| (79, 80, 81)               | D/F Type 6     | 80                  | 0       | 31  | 8    | 39    | 48.8%             | 7.4              | 287            | 203                           |
|                            | General        | 1680                | 306     | 164 | 15   | 485   | 28.9%             | 16.0             | 7771           |                               |
| Pooled Total               |                | 1731                | 322     | 195 | 23   | 540   | 31.2%             | 15.1             | 8132           |                               |
| Pooled Resident            |                | 1311                | 201     | 151 | 19   | 371   | 28.3%             | 16.8             | 6216           |                               |
| Pooled Nonresident         |                | 420                 | 121     | 44  | 4    | 169   | 40.2%             | 11.3             | 1916           |                               |
| 79 Kennaday Peak           |                |                     |         |     |      |       |                   |                  |                |                               |
| (78, 80, 81)               | Limited Type 2 | 11                  | 6       | 0   | 0    | 6     | 54.5%             | 4.2              | 25             | 27                            |
| (78, 80, 81)               | D/F Type 6     | 47                  | 0       | 29  | 4    | 33    | 70.2%             | 6.7              | 221            | 203                           |
|                            | General        | 996                 | 255     | 99  | 3    | 357   | 35.8%             | 12.0             | 4298           |                               |
| Pooled Total               |                | 1026                | 261     | 128 | 7    | 396   | 38.6%             | 11.5             | 4544           |                               |
| Pooled Resident            |                | 651                 | 129     | 70  | 0    | 199   | 30.6%             | 15.1             | 3000           |                               |
| Pooled Nonresident         |                | 375                 | 132     | 58  | 7    | 197   | 52.5%             | 7.8              | 1544           |                               |
| 80 Spring Creek            |                |                     |         |     |      |       |                   |                  |                |                               |
| (78, 79, 81)               | Limited Type 2 | 10                  | 3       | 0   | 0    | 3     | 30.0%             | 11.3             | 34             | 27                            |
| (78, 79, 81)               | D/F Type 6     | 23                  | 0       | 9   | 2    | 11    | 47.8%             | 10.7             | 118            | 203                           |
|                            | General        | 963                 | 296     | 79  | 9    | 384   | 39.9%             | 11.6             | 4442           |                               |
| Pooled Total               |                | 982                 | 299     | 88  | 11   | 398   | 40.5%             | 11.5             | 4594           |                               |
| Pooled Resident            |                | 561                 | 147     | 48  | 9    | 204   | 36.4%             | 13.4             | 2737           |                               |
| Pooled Nonresident         |                | 421                 | 152     | 40  | 2    | 194   | 46.1%             | 9.6              | 1857           |                               |
| 81 Blackhall               |                |                     |         |     |      |       |                   |                  |                |                               |
| (78, 79, 80)               | Limited Type 2 | 2                   | 2       | 0   | 0    | 2     | 100.0%            | 1.5              | 3              | 27                            |
| (78, 79, 80)               | D/F Type 6     | 29                  | 0       | 18  | 0    | 18    | 62.1%             | 7.2              | 130            | 203                           |
|                            | General        | 967                 | 259     | 125 | 12   | 396   | 41.0%             | 11.0             | 4342           |                               |
| Pooled Total               |                | 968                 | 261     | 143 | 12   | 416   | 43.0%             | 10.8             | 4475           |                               |
| Pooled Resident            |                | 608                 | 175     | 92  | 12   | 279   | 45.9%             | 9.6              | 2685           |                               |
| Pooled Nonresident         |                | 360                 | 86      | 51  | 0    | 137   | 38.1%             | 13.1             | 1790           |                               |
| 82 Baggs                   |                |                     |         |     |      |       |                   |                  |                |                               |
| (also valid 84)            | Limited Type 1 | 60                  | 42      | 3   | 0    | 45    | 75.0%             | 7.6              | 344            | 33                            |
| (also valid 84)            | D/F Type 6     | 490                 | 0       | 399 | 8    | 407   | 83.1%             | 6.0              | 2442           | 600                           |
|                            | General        | 2845                | 1649    | 206 | 24   | 1879  | 66.0%             | 6.9              | 12982          |                               |
| Pooled Total               |                | 3216                | 1691    | 608 | 32   | 2331  | 72.5%             | 6.8              | 15768          |                               |
| Pooled Resident            |                | 2050                | 959     | 375 | 23   | 1357  | 66.2%             | 7.3              | 9898           |                               |
| Pooled Nonresident         |                | 1166                | 732     | 233 | 9    | 974   | 83.5%             | 6.0              | 5870           |                               |
| 83 Bolten Rim              |                |                     |         |     |      |       |                   |                  |                |                               |
|                            | General        | 84                  | 31      | 0   | 0    | 31    | 36.9%             | 11.9             | 370            |                               |
| Pooled Total               |                | 84                  | 31      | 0   | 0    | 31    | 36.9%             | 11.9             | 370            |                               |
| Pooled Resident            |                | 40                  | 13      | 0   | 0    | 13    | 32.5%             | 17.2             | 223            |                               |
| Pooled Nonresident         |                | 44                  | 18      | 0   | 0    | 18    | 40.9%             | 8.2              | 147            |                               |
| 84 Atlantic Rim            |                |                     |         |     |      |       |                   |                  |                |                               |
|                            | Limited Type 1 | 133                 | 81      | 3   | 0    | 84    | 63.2%             | 6.7              | 565            | 150                           |
|                            | D/F Type 6     | 29                  | 0       | 19  | 5    | 24    | 82.8%             | 1.9              | 46             | 59                            |
| Pooled Total               |                | 149                 | 81      | 22  | 5    | 108   | 72.5%             | 5.7              | 611            |                               |
| Pooled Resident            |                | 107                 | 60      | 4   | 0    | 64    | 59.8%             | 7.5              | 477            |                               |
| Pooled Nonresident         |                | 42                  | 21      | 18  | 5    | 44    | 104.8%            | 3.0              | 134            |                               |

TABLE I-A (Continued)  
**MULE DEER** HUNT AREA REPORT

| AREA<br>(cross hunt areas) | TYPE             | ACTIVE<br>LICS/HTRS | HARVEST |     |      |       | HUNTER<br>SUCCESS | DAYS/<br>HARVEST | HUNTER<br>DAYS | LICENSES<br>SOLD<br>(cross hunt<br>incl.) |
|----------------------------|------------------|---------------------|---------|-----|------|-------|-------------------|------------------|----------------|-------------------------------------------|
|                            |                  |                     | BUCK    | DOE | FAWN | TOTAL |                   |                  |                |                                           |
| 87 Ferris                  | Limited Type 1   | 275                 | 226     | 0   | 0    | 226   | 82.2%             | 6.3              | 1427           | 301                                       |
| Pooled Total               |                  | 275                 | 226     | 0   | 0    | 226   | 82.2%             | 6.3              | 1427           |                                           |
| Pooled Resident            |                  | 222                 | 184     | 0   | 0    | 184   | 82.9%             | 5.1              | 942            |                                           |
| Pooled Nonresident         |                  | 53                  | 42      | 0   | 0    | 42    | 79.2%             | 11.5             | 485            |                                           |
| 88 Kendrick                | D/F Type 6       | 199                 | 0       | 132 | 8    | 140   | 70.4%             | 7.2              | 1006           | 256                                       |
|                            | General          | 279                 | 144     | 0   | 0    | 144   | 51.6%             | 6.3              | 909            |                                           |
| Pooled Total               |                  | 413                 | 144     | 132 | 8    | 284   | 68.8%             | 6.7              | 1915           |                                           |
| Pooled Resident            |                  | 365                 | 134     | 110 | 4    | 248   | 67.9%             | 7.0              | 1741           |                                           |
| Pooled Nonresident         |                  | 48                  | 10      | 22  | 4    | 36    | 75.0%             | 4.8              | 174            |                                           |
| 89 Rattlesnake             | Limited Type 1   | 278                 | 234     | 0   | 0    | 234   | 84.2%             | 4.3              | 998            | 278                                       |
|                            | D/F Type 6       | 83                  | 0       | 71  | 5    | 76    | 91.6%             | 5.5              | 420            | 94                                        |
| Pooled Total               |                  | 338                 | 234     | 71  | 5    | 310   | 91.7%             | 4.6              | 1418           |                                           |
| Pooled Resident            |                  | 272                 | 183     | 65  | 5    | 253   | 93.0%             | 4.9              | 1239           |                                           |
| Pooled Nonresident         |                  | 66                  | 51      | 6   | 0    | 57    | 86.4%             | 3.1              | 179            |                                           |
| 90 Muskrat                 | Limited Type 1   | 73                  | 64      | 0   | 0    | 64    | 87.7%             | 5.8              | 368            | 75                                        |
| Pooled Total               |                  | 73                  | 64      | 0   | 0    | 64    | 87.7%             | 5.8              | 368            |                                           |
| Pooled Resident            |                  | 58                  | 51      | 0   | 0    | 51    | 87.9%             | 5.7              | 291            |                                           |
| Pooled Nonresident         |                  | 15                  | 13      | 0   | 0    | 13    | 86.7%             | 5.9              | 77             |                                           |
| 91 Popo Agie               | General          | 403                 | 129     | 0   | 0    | 129   | 32.0%             | 12.8             | 1654           |                                           |
| Pooled Total               |                  | 403                 | 129     | 0   | 0    | 129   | 32.0%             | 12.8             | 1654           |                                           |
| Pooled Resident            |                  | 343                 | 99      | 0   | 0    | 99    | 28.9%             | 14.1             | 1394           |                                           |
| Pooled Nonresident         |                  | 60                  | 30      | 0   | 0    | 30    | 50.0%             | 8.7              | 260            |                                           |
| 92 Table Mountain          | D/F Type 6       | 44                  | 0       | 44  | 0    | 44    | 100.0%            | 5.7              | 250            | 50                                        |
|                            | General          | 506                 | 306     | 0   | 0    | 306   | 60.5%             | 4.7              | 1448           |                                           |
| Pooled Total               |                  | 533                 | 306     | 44  | 0    | 350   | 65.7%             | 4.9              | 1698           |                                           |
| Pooled Resident            |                  | 460                 | 269     | 41  | 0    | 310   | 67.4%             | 4.6              | 1423           |                                           |
| Pooled Nonresident         |                  | 73                  | 37      | 3   | 0    | 40    | 54.8%             | 6.9              | 275            |                                           |
| 93 Upper Sweetwater        | General          | 85                  | 22      | 0   | 0    | 22    | 25.9%             | 16.6             | 365            |                                           |
| Pooled Total               |                  | 85                  | 22      | 0   | 0    | 22    | 25.9%             | 16.6             | 365            |                                           |
| Pooled Resident            |                  | 75                  | 19      | 0   | 0    | 19    | 25.3%             | 17.5             | 332            |                                           |
| Pooled Nonresident         |                  | 10                  | 3       | 0   | 0    | 3     | 30.0%             | 11.0             | 33             |                                           |
| 94 Twin Creek              | (160) D/F Type 6 | 28                  | 0       | 20  | 0    | 20    | 71.4%             | 3.7              | 74             | 54                                        |
|                            | General          | 422                 | 167     | 0   | 0    | 167   | 39.6%             | 7.2              | 1210           |                                           |
| Pooled Total               |                  | 440                 | 167     | 20  | 0    | 187   | 42.5%             | 6.9              | 1284           |                                           |
| Pooled Resident            |                  | 377                 | 130     | 14  | 0    | 144   | 38.2%             | 8.1              | 1161           |                                           |
| Pooled Nonresident         |                  | 63                  | 37      | 6   | 0    | 43    | 68.3%             | 2.9              | 123            |                                           |
| 95 South Pass              | General          | 243                 | 47      | 0   | 0    | 47    | 19.3%             | 15.7             | 737            |                                           |
| Pooled Total               |                  | 243                 | 47      | 0   | 0    | 47    | 19.3%             | 15.7             | 737            |                                           |
| Pooled Resident            |                  | 180                 | 47      | 0   | 0    | 47    | 26.1%             | 12.1             | 570            |                                           |
| Pooled Nonresident         |                  | 63                  | 0       | 0   | 0    | 0     | 0.0%              | 0.0              | 167            |                                           |
| 96 Green Mountain          | D/F Type 6       | 46                  | 0       | 37  | 4    | 41    | 89.1%             | 2.3              | 93             | 60                                        |
|                            | General          | 643                 | 301     | 0   | 0    | 301   | 46.8%             | 6.4              | 1937           |                                           |
| Pooled Total               |                  | 677                 | 301     | 37  | 4    | 342   | 50.5%             | 5.9              | 2030           |                                           |
| Pooled Resident            |                  | 480                 | 168     | 28  | 4    | 200   | 41.7%             | 6.3              | 1268           |                                           |
| Pooled Nonresident         |                  | 197                 | 133     | 9   | 0    | 142   | 72.1%             | 5.4              | 762            |                                           |

TABLE I-A (Continued)

## MULE DEER HUNT AREA REPORT

| AREA<br>(cross hunt areas) | TYPE           | ACTIVE<br>LICS/HTRS | HARVEST |     |      |       | HUNTER<br>SUCCESS | DAYS/<br>HARVEST | HUNTER<br>DAYS | LICENSES<br>SOLD<br>(cross hunt<br>incl.) |
|----------------------------|----------------|---------------------|---------|-----|------|-------|-------------------|------------------|----------------|-------------------------------------------|
|                            |                |                     | BUCK    | DOE | FAWN | TOTAL |                   |                  |                |                                           |
| 97 Sweetwater Rocks        |                |                     |         |     |      |       |                   |                  |                |                                           |
|                            | D/F Type 6     | 86                  | 0       | 64  | 11   | 75    | 87.2%             | 1.5              | 112            | 102                                       |
|                            | General        | 401                 | 195     | 0   | 0    | 195   | 48.6%             | 7.3              | 1414           |                                           |
| Pooled Total               |                | 448                 | 195     | 64  | 11   | 270   | 60.3%             | 5.7              | 1526           |                                           |
| Pooled Resident            |                | 368                 | 158     | 54  | 4    | 216   | 58.7%             | 5.6              | 1204           |                                           |
| Pooled Nonresident         |                | 80                  | 37      | 10  | 7    | 54    | 67.5%             | 6.0              | 322            |                                           |
| 98 Chain Lakes             |                |                     |         |     |      |       |                   |                  |                |                                           |
|                            | General        | 108                 | 60      | 0   | 0    | 60    | 55.6%             | 5.6              | 338            |                                           |
| Pooled Total               |                | 108                 | 60      | 0   | 0    | 60    | 55.6%             | 5.6              | 338            |                                           |
| Pooled Resident            |                | 68                  | 33      | 0   | 0    | 33    | 48.5%             | 5.7              | 188            |                                           |
| Pooled Nonresident         |                | 40                  | 27      | 0   | 0    | 27    | 67.5%             | 5.6              | 150            |                                           |
| 100 South Wamsutter        |                |                     |         |     |      |       |                   |                  |                |                                           |
|                            | General        | 375                 | 193     | 0   | 0    | 193   | 51.5%             | 7.0              | 1351           |                                           |
| Pooled Total               |                | 375                 | 193     | 0   | 0    | 193   | 51.5%             | 7.0              | 1351           |                                           |
| Pooled Resident            |                | 245                 | 120     | 0   | 0    | 120   | 49.0%             | 6.9              | 832            |                                           |
| Pooled Nonresident         |                | 130                 | 73      | 0   | 0    | 73    | 56.2%             | 7.1              | 519            |                                           |
| 101 Black Butte            |                |                     |         |     |      |       |                   |                  |                |                                           |
|                            | Limited Type 1 | 75                  | 55      | 0   | 0    | 55    | 73.3%             | 7.0              | 385            | 79                                        |
| Pooled Total               |                | 75                  | 55      | 0   | 0    | 55    | 73.3%             | 7.0              | 385            |                                           |
| Pooled Resident            |                | 57                  | 41      | 0   | 0    | 41    | 71.9%             | 6.8              | 277            |                                           |
| Pooled Nonresident         |                | 18                  | 14      | 0   | 0    | 14    | 77.8%             | 7.7              | 108            |                                           |
|                            |                |                     |         |     |      |       |                   |                  |                |                                           |
| 102 Aspen Mountain         |                |                     |         |     |      |       |                   |                  |                |                                           |
|                            | Limited Type 1 | 374                 | 296     | 0   | 0    | 296   | 79.1%             | 6.9              | 2039           | 402                                       |
| Pooled Total               |                | 374                 | 296     | 0   | 0    | 296   | 79.1%             | 6.9              | 2039           |                                           |
| Pooled Resident            |                | 300                 | 245     | 0   | 0    | 245   | 81.7%             | 6.5              | 1590           |                                           |
| Pooled Nonresident         |                | 74                  | 51      | 0   | 0    | 51    | 68.9%             | 8.8              | 449            |                                           |
|                            |                |                     |         |     |      |       |                   |                  |                |                                           |
| 105 Beartooth              |                |                     |         |     |      |       |                   |                  |                |                                           |
|                            | General        | 365                 | 173     | 38  | 0    | 211   | 57.8%             | 5.6              | 1188           |                                           |
| Pooled Total               |                | 365                 | 173     | 38  | 0    | 211   | 57.8%             | 5.6              | 1188           |                                           |
| Pooled Resident            |                | 254                 | 107     | 35  | 0    | 142   | 55.9%             | 5.3              | 746            |                                           |
| Pooled Nonresident         |                | 111                 | 66      | 3   | 0    | 69    | 62.2%             | 6.4              | 442            |                                           |
| 106 Crandall-Sunlight      |                |                     |         |     |      |       |                   |                  |                |                                           |
|                            | General        | 622                 | 299     | 0   | 0    | 299   | 48.1%             | 9.0              | 2691           |                                           |
| Pooled Total               |                | 622                 | 299     | 0   | 0    | 299   | 48.1%             | 9.0              | 2691           |                                           |
| Pooled Resident            |                | 397                 | 161     | 0   | 0    | 161   | 40.6%             | 10.6             | 1713           |                                           |
| Pooled Nonresident         |                | 225                 | 138     | 0   | 0    | 138   | 61.3%             | 7.1              | 978            |                                           |
| 109 Bald Ridge             |                |                     |         |     |      |       |                   |                  |                |                                           |
|                            | Limited Type 1 | 46                  | 39      | 0   | 0    | 39    | 84.8%             | 4.9              | 190            | 50                                        |
| Pooled Total               |                | 46                  | 39      | 0   | 0    | 39    | 84.8%             | 4.9              | 190            |                                           |
| Pooled Resident            |                | 40                  | 33      | 0   | 0    | 33    | 82.5%             | 5.1              | 169            |                                           |
| Pooled Nonresident         |                | 6                   | 6       | 0   | 0    | 6     | 100.0%            | 3.5              | 21             |                                           |
|                            |                |                     |         |     |      |       |                   |                  |                |                                           |
| 110 Grinnell               |                |                     |         |     |      |       |                   |                  |                |                                           |
|                            | General        | 219                 | 64      | 0   | 0    | 64    | 29.2%             | 15.6             | 998            |                                           |
| Pooled Total               |                | 219                 | 64      | 0   | 0    | 64    | 29.2%             | 15.6             | 998            |                                           |
| Pooled Resident            |                | 119                 | 16      | 0   | 0    | 16    | 13.4%             | 36.3             | 581            |                                           |
| Pooled Nonresident         |                | 100                 | 48      | 0   | 0    | 48    | 48.0%             | 8.7              | 417            |                                           |
| 111 Elk Fork               |                |                     |         |     |      |       |                   |                  |                |                                           |
|                            | D/F Type 6     | 54                  | 0       | 41  | 0    | 41    | 75.9%             | 4.8              | 196            | 76                                        |
|                            | General        | 692                 | 352     | 18  | 4    | 374   | 54.0%             | 7.1              | 2645           |                                           |
| Pooled Total               |                | 723                 | 352     | 59  | 4    | 415   | 57.4%             | 6.8              | 2841           |                                           |
| Pooled Resident            |                | 444                 | 183     | 51  | 4    | 238   | 53.6%             | 7.5              | 1775           |                                           |
| Pooled Nonresident         |                | 279                 | 169     | 8   | 0    | 177   | 63.4%             | 6.0              | 1066           |                                           |

TABLE I-A (Continued)  
**MULE DEER** HUNT AREA REPORT

| AREA<br>(cross hunt areas) | TYPE           | ACTIVE<br>LICS/HTRS | HARVEST |     |      |       | HUNTER<br>SUCCESS | DAYS/<br>HARVEST | HUNTER<br>DAYS | LICENSES<br>SOLD<br>(cross hunt<br>incl.) |
|----------------------------|----------------|---------------------|---------|-----|------|-------|-------------------|------------------|----------------|-------------------------------------------|
|                            |                |                     | BUCK    | DOE | FAWN | TOTAL |                   |                  |                |                                           |
| 112 Ishawooa               |                |                     |         |     |      |       |                   |                  |                |                                           |
| (113)                      | D/F Type 6     | 97                  | 0       | 69  | 15   | 84    | 86.6%             | 3.5              | 296            | 252                                       |
|                            | General        | 608                 | 300     | 34  | 4    | 338   | 55.6%             | 6.7              | 2276           |                                           |
| Pooled Total               |                | 656                 | 300     | 103 | 19   | 422   | 64.3%             | 6.1              | 2572           |                                           |
| Pooled Resident            |                | 385                 | 138     | 73  | 4    | 215   | 55.8%             | 7.3              | 1568           |                                           |
| Pooled Nonresident         |                | 271                 | 162     | 30  | 15   | 207   | 76.4%             | 4.9              | 1004           |                                           |
| 113 Boulder                |                |                     |         |     |      |       |                   |                  |                |                                           |
| (112)                      | D/F Type 6     | 101                 | 0       | 86  | 0    | 86    | 85.1%             | 4.9              | 424            | 252                                       |
|                            | General        | 640                 | 325     | 21  | 4    | 350   | 54.7%             | 7.1              | 2484           |                                           |
| Pooled Total               |                | 691                 | 325     | 107 | 4    | 436   | 63.1%             | 6.7              | 2908           |                                           |
| Pooled Resident            |                | 398                 | 149     | 56  | 4    | 209   | 52.5%             | 8.6              | 1789           |                                           |
| Pooled Nonresident         |                | 293                 | 176     | 51  | 0    | 227   | 77.5%             | 4.9              | 1119           |                                           |
| 114 Wall Mountain          |                |                     |         |     |      |       |                   |                  |                |                                           |
|                            | General        | 10                  | 4       | 0   | 0    | 4     | 40.0%             | 10.8             | 43             |                                           |
| Pooled Total               |                | 10                  | 4       | 0   | 0    | 4     | 40.0%             | 10.8             | 43             |                                           |
| Pooled Resident            |                | 7                   | 4       | 0   | 0    | 4     | 57.1%             | 7.3              | 29             |                                           |
| Pooled Nonresident         |                | 3                   | 0       | 0   | 0    | 0     | 0.0%              | 0.0              | 14             |                                           |
| 115 Thorofare              |                |                     |         |     |      |       |                   |                  |                |                                           |
|                            | General        | 110                 | 47      | 0   | 0    | 47    | 42.7%             | 10.9             | 512            |                                           |
| Pooled Total               |                | 110                 | 47      | 0   | 0    | 47    | 42.7%             | 10.9             | 512            |                                           |
| Pooled Resident            |                | 44                  | 12      | 0   | 0    | 12    | 27.3%             | 20.8             | 249            |                                           |
| Pooled Nonresident         |                | 66                  | 35      | 0   | 0    | 35    | 53.0%             | 7.5              | 263            |                                           |
| 116 Meeteetse              |                |                     |         |     |      |       |                   |                  |                |                                           |
|                            | Limited Type 1 | 123                 | 68      | 2   | 0    | 70    | 56.9%             | 7.6              | 532            | 153                                       |
|                            | D/F Type 6     | 70                  | 0       | 39  | 7    | 46    | 65.7%             | 4.5              | 205            | 104                                       |
| Pooled Total               |                | 162                 | 68      | 41  | 7    | 116   | 71.6%             | 6.4              | 737            |                                           |
| Pooled Resident            |                | 125                 | 47      | 22  | 7    | 76    | 60.8%             | 7.8              | 589            |                                           |
| Pooled Nonresident         |                | 37                  | 21      | 19  | 0    | 40    | 108.1%            | 3.7              | 148            |                                           |
| 117 Franc's Peak           |                |                     |         |     |      |       |                   |                  |                |                                           |
|                            | Limited Type 1 | 47                  | 16      | 0   | 0    | 16    | 34.0%             | 18.3             | 292            | 53                                        |
| Pooled Total               |                | 47                  | 16      | 0   | 0    | 16    | 34.0%             | 18.3             | 292            |                                           |
| Pooled Resident            |                | 35                  | 9       | 0   | 0    | 9     | 25.7%             | 23.2             | 209            |                                           |
| Pooled Nonresident         |                | 12                  | 7       | 0   | 0    | 7     | 58.3%             | 11.9             | 83             |                                           |
| 118 Upper Gooseberry Creek |                |                     |         |     |      |       |                   |                  |                |                                           |
|                            | Limited Type 1 | 71                  | 43      | 2   | 0    | 45    | 63.4%             | 7.2              | 322            | 78                                        |
|                            | D/F Type 6     | 28                  | 0       | 24  | 4    | 28    | 100.0%            | 3.1              | 86             | 35                                        |
| Pooled Total               |                | 81                  | 43      | 26  | 4    | 73    | 90.1%             | 5.6              | 408            |                                           |
| Pooled Resident            |                | 61                  | 32      | 20  | 4    | 56    | 91.8%             | 5.2              | 291            |                                           |
| Pooled Nonresident         |                | 20                  | 11      | 6   | 0    | 17    | 85.0%             | 6.9              | 117            |                                           |
| 119 Anchor                 |                |                     |         |     |      |       |                   |                  |                |                                           |
|                            | Limited Type 1 | 98                  | 84      | 0   | 0    | 84    | 85.7%             | 4.9              | 412            | 104                                       |
|                            | D/F Type 6     | 39                  | 0       | 31  | 2    | 33    | 84.6%             | 3.3              | 108            | 50                                        |
| Pooled Total               |                | 123                 | 84      | 31  | 2    | 117   | 95.1%             | 4.4              | 520            |                                           |
| Pooled Resident            |                | 94                  | 64      | 23  | 2    | 89    | 94.7%             | 4.3              | 379            |                                           |
| Pooled Nonresident         |                | 29                  | 20      | 8   | 0    | 28    | 96.6%             | 5.0              | 141            |                                           |
| 120 Hamilton Dome          |                |                     |         |     |      |       |                   |                  |                |                                           |
|                            | Limited Type 1 | 98                  | 61      | 0   | 0    | 61    | 62.2%             | 7.0              | 430            | 128                                       |
|                            | D/F Type 6     | 68                  | 0       | 45  | 0    | 45    | 66.2%             | 6.2              | 279            | 100                                       |
| Pooled Total               |                | 129                 | 61      | 45  | 0    | 106   | 82.2%             | 6.7              | 709            |                                           |
| Pooled Resident            |                | 89                  | 42      | 22  | 0    | 64    | 71.9%             | 7.4              | 474            |                                           |
| Pooled Nonresident         |                | 40                  | 19      | 23  | 0    | 42    | 105.0%            | 5.6              | 235            |                                           |
| 121 Heart Mountain         |                |                     |         |     |      |       |                   |                  |                |                                           |
|                            | General        | 610                 | 322     | 37  | 2    | 361   | 59.2%             | 4.7              | 1708           |                                           |
| Pooled Total               |                | 610                 | 322     | 37  | 2    | 361   | 59.2%             | 4.7              | 1708           |                                           |
| Pooled Resident            |                | 548                 | 284     | 37  | 2    | 323   | 58.9%             | 4.7              | 1534           |                                           |
| Pooled Nonresident         |                | 62                  | 38      | 0   | 0    | 38    | 61.3%             | 4.6              | 174            |                                           |



TABLE I-A (Continued)  
**MULE DEER** HUNT AREA REPORT

| AREA<br>(cross hunt areas) | TYPE           | ACTIVE<br>LICS/HTRS | HARVEST |     |      |       | HUNTER<br>SUCCESS | DAYS/<br>HARVEST | HUNTER<br>DAYS | LICENSES<br>SOLD<br>(cross hunt<br>incl.) |
|----------------------------|----------------|---------------------|---------|-----|------|-------|-------------------|------------------|----------------|-------------------------------------------|
|                            |                |                     | BUCK    | DOE | FAWN | TOTAL |                   |                  |                |                                           |
| 122 Shoshone River         |                |                     |         |     |      |       |                   |                  |                |                                           |
|                            | General        | 773                 | 277     | 58  | 6    | 341   | 44.1%             | 7.1              | 2405           |                                           |
| Pooled Total               |                | 773                 | 277     | 58  | 6    | 341   | 44.1%             | 7.1              | 2405           |                                           |
| Pooled Resident            |                | 711                 | 260     | 51  | 6    | 317   | 44.6%             | 6.0              | 1908           |                                           |
| Pooled Nonresident         |                | 62                  | 17      | 7   | 0    | 24    | 38.7%             | 20.7             | 497            |                                           |
| 123 Yellowtail             |                |                     |         |     |      |       |                   |                  |                |                                           |
|                            | General        | 110                 | 13      | 0   | 0    | 13    | 11.8%             | 22.3             | 290            |                                           |
| Pooled Total               |                | 110                 | 13      | 0   | 0    | 13    | 11.8%             | 22.3             | 290            |                                           |
| Pooled Resident            |                | 89                  | 6       | 0   | 0    | 6     | 6.7%              | 43.2             | 259            |                                           |
| Pooled Nonresident         |                | 21                  | 7       | 0   | 0    | 7     | 33.3%             | 4.4              | 31             |                                           |
| 124 Emblem                 |                |                     |         |     |      |       |                   |                  |                |                                           |
|                            | D/F Type 6     | 156                 | 0       | 103 | 17   | 120   | 76.9%             | 4.0              | 477            | 204                                       |
|                            | D/F Type 7     | 86                  | 0       | 61  | 6    | 67    | 77.9%             | 3.8              | 257            | 125                                       |
|                            | General        | 658                 | 251     | 80  | 8    | 339   | 51.5%             | 6.8              | 2316           |                                           |
| Pooled Total               |                | 816                 | 251     | 244 | 31   | 526   | 64.5%             | 5.8              | 3050           |                                           |
| Pooled Resident            |                | 698                 | 178     | 201 | 19   | 398   | 57.0%             | 6.5              | 2580           |                                           |
| Pooled Nonresident         |                | 118                 | 73      | 43  | 12   | 128   | 108.5%            | 3.7              | 470            |                                           |
| 125 Fifteen Mile           |                |                     |         |     |      |       |                   |                  |                |                                           |
|                            | Limited Type 1 | 129                 | 82      | 0   | 0    | 82    | 63.6%             | 10.0             | 822            | 135                                       |
|                            | D/F Type 6     | 24                  | 0       | 19  | 0    | 19    | 79.2%             | 8.1              | 154            | 24                                        |
| Pooled Total               |                | 150                 | 82      | 19  | 0    | 101   | 67.3%             | 9.7              | 976            |                                           |
| Pooled Resident            |                | 109                 | 60      | 10  | 0    | 70    | 64.2%             | 9.7              | 678            |                                           |
| Pooled Nonresident         |                | 41                  | 22      | 9   | 0    | 31    | 75.6%             | 9.6              | 298            |                                           |
| 127 Cottonwood             |                |                     |         |     |      |       |                   |                  |                |                                           |
|                            | D/F Type 6     | 29                  | 0       | 22  | 2    | 24    | 82.8%             | 3.7              | 88             | 87                                        |
|                            | General        | 208                 | 73      | 14  | 0    | 87    | 41.8%             | 9.9              | 857            |                                           |
| Pooled Total               |                | 220                 | 73      | 36  | 2    | 111   | 50.5%             | 8.5              | 945            |                                           |
| Pooled Resident            |                | 185                 | 56      | 26  | 0    | 82    | 44.3%             | 9.7              | 798            |                                           |
| Pooled Nonresident         |                | 35                  | 17      | 10  | 2    | 29    | 82.9%             | 5.1              | 147            |                                           |
| 128 Wind River             |                |                     |         |     |      |       |                   |                  |                |                                           |
|                            | Limited Type 1 | 101                 | 80      | 2   | 0    | 82    | 81.2%             | 8.2              | 674            | 107                                       |
|                            | D/F Type 6     | 59                  | 0       | 55  | 3    | 58    | 98.3%             | 3.3              | 194            | 100                                       |
|                            | D/F Type 7     | 115                 | 0       | 95  | 10   | 105   | 91.3%             | 3.2              | 332            | 150                                       |
|                            | General        | 1073                | 411     | 0   | 0    | 411   | 38.3%             | 14.7             | 6042           |                                           |
| Pooled Total               |                | 1249                | 491     | 152 | 13   | 656   | 52.5%             | 11.0             | 7242           |                                           |
| Pooled Resident            |                | 1025                | 387     | 125 | 13   | 525   | 51.2%             | 11.5             | 6042           |                                           |
| Pooled Nonresident         |                | 224                 | 104     | 27  | 0    | 131   | 58.5%             | 9.2              | 1200           |                                           |
| 130 Big Sandy              |                |                     |         |     |      |       |                   |                  |                |                                           |
|                            | Limited Type 1 | 24                  | 24      | 0   | 0    | 24    | 100.0%            | 4.6              | 111            | 26                                        |
|                            | D/F Type 6     | 8                   | 0       | 2   | 0    | 2     | 25.0%             | 5.5              | 11             | 11                                        |
|                            | General        | 274                 | 96      | 0   | 0    | 96    | 35.0%             | 10.0             | 960            |                                           |
| Pooled Total               |                | 306                 | 120     | 2   | 0    | 122   | 39.9%             | 8.9              | 1082           |                                           |
| Pooled Resident            |                | 291                 | 107     | 0   | 0    | 107   | 36.8%             | 9.6              | 1023           |                                           |
| Pooled Nonresident         |                | 15                  | 13      | 2   | 0    | 15    | 100.0%            | 3.9              | 59             |                                           |
| 131 Steamboat              |                |                     |         |     |      |       |                   |                  |                |                                           |
|                            | Limited Type 2 | 36                  | 0       | 25  | 2    | 27    | 75.0%             | 2.9              | 78             | 55                                        |
|                            | General        | 1034                | 357     | 0   | 0    | 357   | 34.5%             | 10.3             | 3678           |                                           |
| Pooled Total               |                | 1070                | 357     | 25  | 2    | 384   | 35.9%             | 9.8              | 3756           |                                           |
| Pooled Resident            |                | 987                 | 310     | 25  | 2    | 337   | 34.1%             | 10.1             | 3417           |                                           |
| Pooled Nonresident         |                | 83                  | 47      | 0   | 0    | 47    | 56.6%             | 7.2              | 339            |                                           |

TABLE I-A (Continued)

## MULE DEER HUNT AREA REPORT

| AREA<br>(cross hunt areas) | TYPE    | ACTIVE<br>LICS/HTRS | HARVEST |     |      |       | HUNTER<br>SUCCESS | DAYS/<br>HARVEST | HUNTER<br>DAYS | LICENSES<br>SOLD<br>(cross hunt<br>incl.) |
|----------------------------|---------|---------------------|---------|-----|------|-------|-------------------|------------------|----------------|-------------------------------------------|
|                            |         |                     | BUCK    | DOE | FAWN | TOTAL |                   |                  |                |                                           |
| 132 Cedar Mountain         |         |                     |         |     |      |       |                   |                  |                |                                           |
|                            | General | 499                 | 137     | 0   | 0    | 137   | 27.5%             | 14.5             | 1986           |                                           |
| Pooled Total               |         | 499                 | 137     | 0   | 0    | 137   | 27.5%             | 14.5             | 1986           |                                           |
| Pooled Resident            |         | 443                 | 99      | 0   | 0    | 99    | 22.3%             | 17.9             | 1772           |                                           |
| Pooled Nonresident         |         | 56                  | 38      | 0   | 0    | 38    | 67.9%             | 5.6              | 214            |                                           |
| 133 Uinta                  |         |                     |         |     |      |       |                   |                  |                |                                           |
|                            | General | 964                 | 421     | 0   | 0    | 421   | 43.7%             | 9.4              | 3938           |                                           |
| Pooled Total               |         | 964                 | 421     | 0   | 0    | 421   | 43.7%             | 9.4              | 3938           |                                           |
| Pooled Resident            |         | 835                 | 351     | 0   | 0    | 351   | 42.0%             | 9.5              | 3327           |                                           |
| Pooled Nonresident         |         | 129                 | 70      | 0   | 0    | 70    | 54.3%             | 8.7              | 611            |                                           |
| 134 Bear River Divide      |         |                     |         |     |      |       |                   |                  |                |                                           |
|                            | General | 732                 | 389     | 0   | 0    | 389   | 53.1%             | 6.2              | 2397           |                                           |
| Pooled Total               |         | 732                 | 389     | 0   | 0    | 389   | 53.1%             | 6.2              | 2397           |                                           |
| Pooled Resident            |         | 571                 | 293     | 0   | 0    | 293   | 51.3%             | 5.9              | 1724           |                                           |
| Pooled Nonresident         |         | 161                 | 96      | 0   | 0    | 96    | 59.6%             | 7.0              | 673            |                                           |
| 135 West Green River       |         |                     |         |     |      |       |                   |                  |                |                                           |
|                            | General | 2141                | 982     | 0   | 0    | 982   | 45.9%             | 10.3             | 10070          |                                           |
| Pooled Total               |         | 2141                | 982     | 0   | 0    | 982   | 45.9%             | 10.3             | 10070          |                                           |
| Pooled Resident            |         | 1891                | 845     | 0   | 0    | 845   | 44.7%             | 10.6             | 8987           |                                           |
| Pooled Nonresident         |         | 250                 | 137     | 0   | 0    | 137   | 54.8%             | 7.9              | 1083           |                                           |
| 138 Boulder                |         |                     |         |     |      |       |                   |                  |                |                                           |
|                            | General | 523                 | 128     | 34  | 8    | 170   | 32.5%             | 13.3             | 2266           |                                           |
| Pooled Total               |         | 523                 | 128     | 34  | 8    | 170   | 32.5%             | 13.3             | 2266           |                                           |
| Pooled Resident            |         | 481                 | 121     | 34  | 8    | 163   | 33.9%             | 12.3             | 2001           |                                           |
| Pooled Nonresident         |         | 42                  | 7       | 0   | 0    | 7     | 16.7%             | 37.9             | 265            |                                           |
| 139 Pinedale               |         |                     |         |     |      |       |                   |                  |                |                                           |
|                            | General | 466                 | 147     | 83  | 9    | 239   | 51.3%             | 8.2              | 1950           |                                           |
| Pooled Total               |         | 466                 | 147     | 83  | 9    | 239   | 51.3%             | 8.2              | 1950           |                                           |
| Pooled Resident            |         | 427                 | 133     | 76  | 9    | 218   | 51.1%             | 8.2              | 1781           |                                           |
| Pooled Nonresident         |         | 39                  | 14      | 7   | 0    | 21    | 53.8%             | 8.0              | 169            |                                           |
| 140 New Fork               |         |                     |         |     |      |       |                   |                  |                |                                           |
|                            | General | 370                 | 88      | 70  | 0    | 158   | 42.7%             | 9.7              | 1530           |                                           |
| Pooled Total               |         | 370                 | 88      | 70  | 0    | 158   | 42.7%             | 9.7              | 1530           |                                           |
| Pooled Resident            |         | 331                 | 77      | 70  | 0    | 147   | 44.4%             | 9.2              | 1354           |                                           |
| Pooled Nonresident         |         | 39                  | 11      | 0   | 0    | 11    | 28.2%             | 16.0             | 176            |                                           |
| 141 Green River            |         |                     |         |     |      |       |                   |                  |                |                                           |
| (162) Limited Type 1       |         | 78                  | 36      | 2   | 0    | 38    | 48.7%             | 13.1             | 499            | 125                                       |
| Pooled Total               |         | 78                  | 36      | 2   | 0    | 38    | 48.7%             | 13.1             | 499            |                                           |
| Pooled Resident            |         | 61                  | 30      | 2   | 0    | 32    | 52.5%             | 13.2             | 421            |                                           |
| Pooled Nonresident         |         | 17                  | 6       | 0   | 0    | 6     | 35.3%             | 13.0             | 78             |                                           |
| 142 Piney-Horse Creek      |         |                     |         |     |      |       |                   |                  |                |                                           |
|                            | General | 716                 | 206     | 0   | 0    | 206   | 28.8%             | 18.5             | 3805           |                                           |
| Pooled Total               |         | 716                 | 206     | 0   | 0    | 206   | 28.8%             | 18.5             | 3805           |                                           |
| Pooled Resident            |         | 557                 | 150     | 0   | 0    | 150   | 26.9%             | 18.8             | 2822           |                                           |
| Pooled Nonresident         |         | 159                 | 56      | 0   | 0    | 56    | 35.2%             | 17.6             | 983            |                                           |
| 143 South Piney            |         |                     |         |     |      |       |                   |                  |                |                                           |
|                            | General | 888                 | 259     | 0   | 0    | 259   | 29.2%             | 16.6             | 4295           |                                           |
| Pooled Total               |         | 888                 | 259     | 0   | 0    | 259   | 29.2%             | 16.6             | 4295           |                                           |
| Pooled Resident            |         | 813                 | 234     | 0   | 0    | 234   | 28.8%             | 16.9             | 3964           |                                           |
| Pooled Nonresident         |         | 75                  | 25      | 0   | 0    | 25    | 33.3%             | 13.2             | 331            |                                           |

TABLE I-A (Continued)

**MULE DEER HUNT AREA REPORT**

| LICENSES                   |         |                     |         |     |      |       |                   |                  |                |                               |
|----------------------------|---------|---------------------|---------|-----|------|-------|-------------------|------------------|----------------|-------------------------------|
| AREA<br>(cross hunt areas) | TYPE    | ACTIVE<br>LICS/HTRS | HARVEST |     |      |       | HUNTER<br>SUCCESS | DAYS/<br>HARVEST | HUNTER<br>DAYS | SOLD<br>(cross hunt<br>incl.) |
|                            |         |                     | BUCK    | DOE | FAWN | TOTAL |                   |                  |                |                               |
|                            |         |                     |         |     |      |       |                   |                  |                |                               |
| 144 Greys River            | General | 1092                | 344     | 0   | 0    | 344   | 31.5%             | 14.4             | 4938           |                               |
| Pooled Total               |         | 1092                | 344     | 0   | 0    | 344   | 31.5%             | 14.4             | 4938           |                               |
| Pooled Resident            |         | 742                 | 179     | 0   | 0    | 179   | 24.1%             | 17.7             | 3175           |                               |
| Pooled Nonresident         |         | 350                 | 165     | 0   | 0    | 165   | 47.1%             | 10.7             | 1763           |                               |
|                            |         |                     |         |     |      |       |                   |                  |                |                               |
| 145 Salt River             | General | 909                 | 297     | 0   | 0    | 297   | 32.7%             | 14.4             | 4286           |                               |
| Pooled Total               |         | 909                 | 297     | 0   | 0    | 297   | 32.7%             | 14.4             | 4286           |                               |
| Pooled Resident            |         | 750                 | 213     | 0   | 0    | 213   | 28.4%             | 16.2             | 3450           |                               |
| Pooled Nonresident         |         | 159                 | 84      | 0   | 0    | 84    | 52.8%             | 10.0             | 836            |                               |
|                            |         |                     |         |     |      |       |                   |                  |                |                               |
| 146 Fish Creek             | General | 243                 | 80      | 15  | 0    | 95    | 39.1%             | 11.5             | 1097           |                               |
| Pooled Total               |         | 243                 | 80      | 15  | 0    | 95    | 39.1%             | 11.5             | 1097           |                               |
| Pooled Resident            |         | 222                 | 73      | 15  | 0    | 88    | 39.6%             | 11.3             | 991            |                               |
| Pooled Nonresident         |         | 21                  | 7       | 0   | 0    | 7     | 33.3%             | 15.1             | 106            |                               |
|                            |         |                     |         |     |      |       |                   |                  |                |                               |
| 148 Teton                  | General | 232                 | 72      | 0   | 0    | 72    | 31.0%             | 25.0             | 1800           |                               |
| Pooled Total               |         | 232                 | 72      | 0   | 0    | 72    | 31.0%             | 25.0             | 1800           |                               |
| Pooled Resident            |         | 202                 | 59      | 0   | 0    | 59    | 29.2%             | 27.9             | 1647           |                               |
| Pooled Nonresident         |         | 30                  | 13      | 0   | 0    | 13    | 43.3%             | 11.8             | 153            |                               |
|                            |         |                     |         |     |      |       |                   |                  |                |                               |
| 149 Targhee                | General | 179                 | 38      | 0   | 0    | 38    | 21.2%             | 30.4             | 1154           |                               |
| Pooled Total               |         | 179                 | 38      | 0   | 0    | 38    | 21.2%             | 30.4             | 1154           |                               |
| Pooled Resident            |         | 115                 | 6       | 0   | 0    | 6     | 5.2%              | 128.7            | 772            |                               |
| Pooled Nonresident         |         | 64                  | 32      | 0   | 0    | 32    | 50.0%             | 11.9             | 382            |                               |
|                            |         |                     |         |     |      |       |                   |                  |                |                               |
| 150 Wilson                 | General | 57                  | 14      | 0   | 4    | 18    | 31.6%             | 18.6             | 334            |                               |
| Pooled Total               |         | 57                  | 14      | 0   | 4    | 18    | 31.6%             | 18.6             | 334            |                               |
| Pooled Resident            |         | 39                  | 0       | 0   | 4    | 4     | 10.3%             | 60.5             | 242            |                               |
| Pooled Nonresident         |         | 18                  | 14      | 0   | 0    | 14    | 77.8%             | 6.6              | 92             |                               |
|                            |         |                     |         |     |      |       |                   |                  |                |                               |
| 151 Fall Creek             | General | 529                 | 117     | 18  | 4    | 139   | 26.3%             | 20.1             | 2791           |                               |
| Pooled Total               |         | 529                 | 117     | 18  | 4    | 139   | 26.3%             | 20.1             | 2791           |                               |
| Pooled Resident            |         | 420                 | 75      | 18  | 4    | 97    | 23.1%             | 22.2             | 2149           |                               |
| Pooled Nonresident         |         | 109                 | 42      | 0   | 0    | 42    | 38.5%             | 15.3             | 642            |                               |
|                            |         |                     |         |     |      |       |                   |                  |                |                               |
| 152 Lower Hoback           | General | 1057                | 389     | 33  | 0    | 422   | 39.9%             | 11.7             | 4938           |                               |
| Pooled Total               |         | 1057                | 389     | 33  | 0    | 422   | 39.9%             | 11.7             | 4938           |                               |
| Pooled Resident            |         | 736                 | 227     | 33  | 0    | 260   | 35.3%             | 13.5             | 3498           |                               |
| Pooled Nonresident         |         | 321                 | 162     | 0   | 0    | 162   | 50.5%             | 8.9              | 1440           |                               |
|                            |         |                     |         |     |      |       |                   |                  |                |                               |
| 153 Monument Ridge         | General | 357                 | 100     | 0   | 0    | 100   | 28.0%             | 18.7             | 1869           |                               |
| Pooled Total               |         | 357                 | 100     | 0   | 0    | 100   | 28.0%             | 18.7             | 1869           |                               |
| Pooled Resident            |         | 212                 | 40      | 0   | 0    | 40    | 18.9%             | 29.7             | 1188           |                               |
| Pooled Nonresident         |         | 145                 | 60      | 0   | 0    | 60    | 41.4%             | 11.4             | 681            |                               |
|                            |         |                     |         |     |      |       |                   |                  |                |                               |
| 154 Raspberry Ridge        | General | 603                 | 206     | 7   | 0    | 213   | 35.3%             | 16.6             | 3530           |                               |
| Pooled Total               |         | 603                 | 206     | 7   | 0    | 213   | 35.3%             | 16.6             | 3530           |                               |
| Pooled Resident            |         | 437                 | 132     | 7   | 0    | 139   | 31.8%             | 17.7             | 2463           |                               |
| Pooled Nonresident         |         | 166                 | 74      | 0   | 0    | 74    | 44.6%             | 14.4             | 1067           |                               |

TABLE I-A (Continued)

## MULE DEER HUNT AREA REPORT

| AREA<br>(cross hunt areas) | TYPE           | ACTIVE<br>LICS/HTRS | HARVEST |     |      |       | HUNTER<br>SUCCESS | DAYS/<br>HARVEST | HUNTER<br>DAYS | LICENSES<br>SOLD<br>(cross hunt<br>incl.) |
|----------------------------|----------------|---------------------|---------|-----|------|-------|-------------------|------------------|----------------|-------------------------------------------|
|                            |                |                     | BUCK    | DOE | FAWN | TOTAL |                   |                  |                |                                           |
| 155 Crystal Peak           |                |                     |         |     |      |       |                   |                  |                |                                           |
|                            | General        | 286                 | 90      | 21  | 0    | 111   | 38.8%             | 12.5             | 1391           |                                           |
| Pooled Total               |                | 286                 | 90      | 21  | 0    | 111   | 38.8%             | 12.5             | 1391           |                                           |
| Pooled Resident            |                | 258                 | 83      | 21  | 0    | 104   | 40.3%             | 12.1             | 1260           |                                           |
| Pooled Nonresident         |                | 28                  | 7       | 0   | 0    | 7     | 25.0%             | 18.7             | 131            |                                           |
| 156 Spread Creek           |                |                     |         |     |      |       |                   |                  |                |                                           |
|                            | General        | 476                 | 123     | 37  | 0    | 160   | 33.6%             | 15.2             | 2436           |                                           |
| Pooled Total               |                | 476                 | 123     | 37  | 0    | 160   | 33.6%             | 15.2             | 2436           |                                           |
| Pooled Resident            |                | 384                 | 91      | 37  | 0    | 128   | 33.3%             | 14.9             | 1909           |                                           |
| Pooled Nonresident         |                | 92                  | 32      | 0   | 0    | 32    | 34.8%             | 16.5             | 527            |                                           |
| 157 Boysen                 |                |                     |         |     |      |       |                   |                  |                |                                           |
| (170)                      | Limited Type 1 | 213                 | 168     | 14  | 0    | 182   | 85.4%             | 4.9              | 889            | 255                                       |
| (170)                      | D/F Type 6     | 267                 | 0       | 185 | 30   | 215   | 80.5%             | 4.1              | 892            | 330                                       |
| Pooled Total               |                | 385                 | 168     | 199 | 30   | 397   | 103.1%            | 4.5              | 1781           |                                           |
| Pooled Resident            |                | 323                 | 129     | 176 | 24   | 329   | 101.9%            | 4.4              | 1446           |                                           |
| Pooled Nonresident         |                | 62                  | 39      | 23  | 6    | 68    | 109.7%            | 4.9              | 335            |                                           |
| 158 Ormsby                 |                |                     |         |     |      |       |                   |                  |                |                                           |
| (also valid 22)            | Limited Type 1 | 336                 | 252     | 13  | 9    | 274   | 81.5%             | 3.6              | 992            | 411                                       |
| (22)                       | D/F Type 6     | 88                  | 0       | 56  | 4    | 60    | 68.2%             | 5.0              | 298            | 286                                       |
| Pooled Total               |                | 413                 | 252     | 69  | 13   | 334   | 80.9%             | 3.9              | 1290           |                                           |
| Pooled Resident            |                | 132                 | 42      | 39  | 13   | 94    | 71.2%             | 4.1              | 390            |                                           |
| Pooled Nonresident         |                | 281                 | 210     | 30  | 0    | 240   | 85.4%             | 3.8              | 900            |                                           |
| 160 Beaver Creek           |                |                     |         |     |      |       |                   |                  |                |                                           |
| (94)                       | D/F Type 6     | 22                  | 0       | 10  | 2    | 12    | 54.5%             | 5.7              | 68             | 54                                        |
|                            | General        | 332                 | 137     | 0   | 0    | 137   | 41.3%             | 8.9              | 1225           |                                           |
| Pooled Total               |                | 343                 | 137     | 10  | 2    | 149   | 43.4%             | 8.7              | 1293           |                                           |
| Pooled Resident            |                | 276                 | 100     | 10  | 2    | 112   | 40.6%             | 9.4              | 1050           |                                           |
| Pooled Nonresident         |                | 67                  | 37      | 0   | 0    | 37    | 55.2%             | 6.6              | 243            |                                           |
| 161 St. Mary's Creek       |                |                     |         |     |      |       |                   |                  |                |                                           |
|                            | General        | 86                  | 36      | 0   | 0    | 36    | 41.9%             | 7.6              | 275            |                                           |
| Pooled Total               |                | 86                  | 36      | 0   | 0    | 36    | 41.9%             | 7.6              | 275            |                                           |
| Pooled Resident            |                | 71                  | 29      | 0   | 0    | 29    | 40.8%             | 8.3              | 242            |                                           |
| Pooled Nonresident         |                | 15                  | 7       | 0   | 0    | 7     | 46.7%             | 4.7              | 33             |                                           |
| 162 Water Dog Lakes        |                |                     |         |     |      |       |                   |                  |                |                                           |
| (141)                      | Limited Type 1 | 51                  | 21      | 0   | 0    | 21    | 41.2%             | 14.8             | 310            | 125                                       |
| Pooled Total               |                | 51                  | 21      | 0   | 0    | 21    | 41.2%             | 14.8             | 310            |                                           |
| Pooled Resident            |                | 35                  | 16      | 0   | 0    | 16    | 45.7%             | 13.5             | 216            |                                           |
| Pooled Nonresident         |                | 16                  | 5       | 0   | 0    | 5     | 31.3%             | 18.8             | 94             |                                           |
| 163 Middle Fork            |                |                     |         |     |      |       |                   |                  |                |                                           |
|                            | General        | 269                 | 153     | 0   | 0    | 153   | 56.9%             | 7.7              | 1180           |                                           |
| Pooled Total               |                | 269                 | 153     | 0   | 0    | 153   | 56.9%             | 7.7              | 1180           |                                           |
| Pooled Resident            |                | 50                  | 17      | 0   | 0    | 17    | 34.0%             | 14.0             | 238            |                                           |
| Pooled Nonresident         |                | 219                 | 136     | 0   | 0    | 136   | 62.1%             | 6.9              | 942            |                                           |
| 164 Nowater                |                |                     |         |     |      |       |                   |                  |                |                                           |
|                            | D/F Type 6     | 49                  | 0       | 30  | 2    | 32    | 65.3%             | 8.4              | 270            | 75                                        |
|                            | General        | 339                 | 95      | 22  | 0    | 117   | 34.5%             | 11.1             | 1293           |                                           |
| Pooled Total               |                | 360                 | 95      | 52  | 2    | 149   | 41.4%             | 10.5             | 1563           |                                           |
| Pooled Resident            |                | 238                 | 45      | 38  | 2    | 85    | 35.7%             | 12.2             | 1041           |                                           |
| Pooled Nonresident         |                | 122                 | 50      | 14  | 0    | 64    | 52.5%             | 8.2              | 522            |                                           |

TABLE I-A (Continued)

**MULE DEER HUNT AREA REPORT**

| AREA<br>(cross hunt areas) | TYPE                 | ACTIVE<br>LICS/HTRS | HARVEST |     |      |       | HUNTER<br>SUCCESS | DAYS/<br>HARVEST | HUNTER<br>DAYS | LICENSES<br>SOLD<br>(cross hunt<br>incl.) |
|----------------------------|----------------------|---------------------|---------|-----|------|-------|-------------------|------------------|----------------|-------------------------------------------|
|                            |                      |                     | BUCK    | DOE | FAWN | TOTAL |                   |                  |                |                                           |
| 165 YU Bench               |                      |                     |         |     |      |       |                   |                  |                |                                           |
|                            | Limited Type 1       | 99                  | 69      | 2   | 0    | 71    | 71.7%             | 4.8              | 343            | 107                                       |
|                            | D/F Type 6           | 101                 | 0       | 85  | 3    | 88    | 87.1%             | 5.5              | 485            | 167                                       |
|                            | Pooled Total         | 158                 | 69      | 87  | 3    | 159   | 100.6%            | 5.2              | 828            |                                           |
|                            | Pooled Resident      | 117                 | 49      | 61  | 3    | 113   | 96.6%             | 5.1              | 571            |                                           |
|                            | Pooled Nonresident   | 41                  | 20      | 26  | 0    | 46    | 112.2%            | 5.6              | 257            |                                           |
| 167 Dull Center            |                      |                     |         |     |      |       |                   |                  |                |                                           |
|                            | General              | 221                 | 117     | 0   | 0    | 117   | 52.9%             | 6.0              | 707            |                                           |
|                            | Pooled Total         | 221                 | 117     | 0   | 0    | 117   | 52.9%             | 6.0              | 707            |                                           |
|                            | Pooled Resident      | 65                  | 25      | 0   | 0    | 25    | 38.5%             | 7.2              | 180            |                                           |
|                            | Pooled Nonresident   | 156                 | 92      | 0   | 0    | 92    | 59.0%             | 5.7              | 527            |                                           |
| 168 Medicine Butte         |                      |                     |         |     |      |       |                   |                  |                |                                           |
|                            | General              | 1005                | 460     | 0   | 0    | 460   | 45.8%             | 8.1              | 3724           |                                           |
|                            | Pooled Total         | 1005                | 460     | 0   | 0    | 460   | 45.8%             | 8.1              | 3724           |                                           |
|                            | Pooled Resident      | 838                 | 355     | 0   | 0    | 355   | 42.4%             | 8.8              | 3133           |                                           |
|                            | Pooled Nonresident   | 167                 | 105     | 0   | 0    | 105   | 62.9%             | 5.6              | 591            |                                           |
| 169 Tisdale Mountain       |                      |                     |         |     |      |       |                   |                  |                |                                           |
|                            | General              | 204                 | 152     | 0   | 0    | 152   | 74.5%             | 3.9              | 591            |                                           |
|                            | Pooled Total         | 204                 | 152     | 0   | 0    | 152   | 74.5%             | 3.9              | 591            |                                           |
|                            | Pooled Resident      | 57                  | 44      | 0   | 0    | 44    | 77.2%             | 2.0              | 90             |                                           |
|                            | Pooled Nonresident   | 147                 | 108     | 0   | 0    | 108   | 73.5%             | 4.6              | 501            |                                           |
| 170 Riverview              |                      |                     |         |     |      |       |                   |                  |                |                                           |
|                            | (157) Limited Type 1 | 20                  | 2       | 0   | 0    | 2     | 10.0%             | 27.0             | 54             | 255                                       |
|                            | (157) D/F Type 6     | 19                  | 0       | 10  | 3    | 13    | 68.4%             | 4.1              | 53             | 330                                       |
|                            | Pooled Total         | 36                  | 2       | 10  | 3    | 15    | 41.7%             | 7.1              | 107            |                                           |
|                            | Pooled Resident      | 32                  | 2       | 6   | 3    | 11    | 34.4%             | 8.0              | 88             |                                           |
|                            | Pooled Nonresident   | 4                   | 0       | 4   | 0    | 4     | 100.0%            | 4.8              | 19             |                                           |
| 171 Crowheart Butte        |                      |                     |         |     |      |       |                   |                  |                |                                           |
|                            | General              | 172                 | 54      | 12  | 2    | 68    | 39.5%             | 8.3              | 563            |                                           |
|                            | Pooled Total         | 172                 | 54      | 12  | 2    | 68    | 39.5%             | 8.3              | 563            |                                           |
|                            | Pooled Resident      | 152                 | 51      | 12  | 2    | 65    | 42.8%             | 7.4              | 483            |                                           |
|                            | Pooled Nonresident   | 20                  | 3       | 0   | 0    | 3     | 15.0%             | 26.7             | 80             |                                           |

TABLE I-H  
MULE DEER HARVEST  
BY HERD UNIT  
2007

| HERD                    | TYPE    | ACTIVE<br>LICS/HTRS | HARVEST |     |      |       | HUNTER<br>SUCCESS | DAYS/<br>HARVEST | HUNTER<br>DAYS | LICENSES<br>SOLD<br>(cross hunt<br>incl.) |
|-------------------------|---------|---------------------|---------|-----|------|-------|-------------------|------------------|----------------|-------------------------------------------|
|                         |         |                     | BUCK    | DOE | FAWN | TOTAL |                   |                  |                |                                           |
| 101 Targhee             | General | 179                 | 38      | 0   | 0    | 38    | 21.2%             | 30.4             | 1154           |                                           |
| Total Hunters           |         | 179                 | 38      | 0   | 0    | 38    | 21.2%             | 30.4             | 1154           |                                           |
| Resident                |         | 115                 | 6       | 0   | 0    | 6     | 5.2%              | 128.7            | 772            |                                           |
| Nonresident             |         | 64                  | 32      | 0   | 0    | 32    | 50.0%             | 11.9             | 382            |                                           |
| 104 Sublette            | D/F     | 8                   | 0       | 2   | 0    | 2     | 25.0%             | 5.5              | 11             | 11                                        |
|                         | Limited | 141                 | 81      | 2   | 0    | 83    | 58.9%             | 11.1             | 920            | 151                                       |
|                         | General | 5115                | 1784    | 318 | 25   | 2127  | 41.6%             | 13.6             | 28897          |                                           |
| Total Hunters           |         | 5262                | 1865    | 322 | 25   | 2212  | 42.0%             | 13.5             | 29828          |                                           |
| Resident                |         | 4215                | 1355    | 313 | 25   | 1693  | 40.2%             | 13.8             | 23318          |                                           |
| Nonresident             |         | 1047                | 510     | 9   | 0    | 519   | 49.6%             | 12.5             | 6510           |                                           |
| 131 Wyoming Range       | General | 5027                | 2271    | 0   | 0    | 2271  | 45.2%             | 11.4             | 25986          |                                           |
| Total Hunters           |         | 5027                | 2271    | 0   | 0    | 2271  | 45.2%             | 11.4             | 25986          |                                           |
| Resident                |         | 4120                | 1764    | 0   | 0    | 1764  | 42.8%             | 12.1             | 21300          |                                           |
| Nonresident             |         | 907                 | 507     | 0   | 0    | 507   | 55.9%             | 9.2              | 4686           |                                           |
| 207 Paintrock           | D/F     | 264                 | 0       | 187 | 29   | 216   | 81.8%             | 5.6              | 1208           | 346                                       |
|                         | General | 1551                | 585     | 142 | 4    | 731   | 47.1%             | 9.5              | 6915           |                                           |
| Total Hunters           |         | 1684                | 585     | 329 | 33   | 947   | 56.2%             | 8.6              | 8123           |                                           |
| Resident                |         | 999                 | 244     | 169 | 11   | 424   | 42.4%             | 10.9             | 4627           |                                           |
| Nonresident             |         | 685                 | 341     | 160 | 22   | 523   | 76.4%             | 6.7              | 3496           |                                           |
| 208 Southwest Bighorns  | D/F     | 431                 | 0       | 288 | 25   | 313   | 72.6%             | 5.4              | 1695           | 569                                       |
|                         | Limited | 168                 | 126     | 12  | 0    | 138   | 82.1%             | 5.1              | 708            | 179                                       |
|                         | General | 2367                | 1178    | 130 | 4    | 1312  | 55.4%             | 7.6              | 9952           |                                           |
| Total Hunters           |         | 2760                | 1304    | 430 | 29   | 1763  | 63.9%             | 7.0              | 12355          |                                           |
| Resident                |         | 1299                | 542     | 171 | 12   | 725   | 55.8%             | 7.7              | 5556           |                                           |
| Nonresident             |         | 1461                | 762     | 259 | 17   | 1038  | 71.0%             | 6.6              | 6799           |                                           |
| 209 Basin               | D/F     | 53                  | 0       | 41  | 2    | 43    | 81.1%             | 5.6              | 242            | 111                                       |
|                         | Limited | 129                 | 82      | 0   | 0    | 82    | 63.6%             | 10.0             | 822            | 135                                       |
|                         | General | 208                 | 73      | 14  | 0    | 87    | 41.8%             | 9.9              | 857            |                                           |
| Total Hunters           |         | 370                 | 155     | 55  | 2    | 212   | 57.3%             | 9.1              | 1921           |                                           |
| Resident                |         | 295                 | 116     | 36  | 0    | 152   | 51.5%             | 9.7              | 1476           |                                           |
| Nonresident             |         | 75                  | 39      | 19  | 2    | 60    | 80.0%             | 7.4              | 445            |                                           |
| 210 Greybull River      | D/F     | 343                 | 0       | 249 | 26   | 275   | 80.2%             | 4.4              | 1219           | 496                                       |
|                         | Limited | 99                  | 69      | 2   | 0    | 71    | 71.7%             | 4.8              | 343            | 107                                       |
|                         | General | 658                 | 251     | 80  | 8    | 339   | 51.5%             | 6.8              | 2316           |                                           |
| Total Hunters           |         | 971                 | 320     | 331 | 34   | 685   | 70.5%             | 5.7              | 3878           |                                           |
| Resident                |         | 813                 | 227     | 262 | 22   | 511   | 62.9%             | 6.2              | 3151           |                                           |
| Nonresident             |         | 158                 | 93      | 69  | 12   | 174   | 110.1%            | 4.2              | 727            |                                           |
| 211 Shoshone River      | General | 828                 | 290     | 58  | 6    | 354   | 42.8%             | 7.6              | 2695           |                                           |
| Total Hunters           |         | 828                 | 290     | 58  | 6    | 354   | 42.8%             | 7.6              | 2695           |                                           |
| Resident                |         | 745                 | 266     | 51  | 6    | 323   | 43.4%             | 6.7              | 2167           |                                           |
| Nonresident             |         | 83                  | 24      | 7   | 0    | 31    | 37.3%             | 17.0             | 528            |                                           |
| 212 Owl Creek/Meeteetse | D/F     | 205                 | 0       | 139 | 13   | 152   | 74.1%             | 4.5              | 678            | 289                                       |
|                         | Limited | 437                 | 272     | 4   | 0    | 276   | 63.2%             | 7.2              | 1988           | 516                                       |
| Total Hunters           |         | 543                 | 272     | 143 | 13   | 428   | 78.8%             | 6.2              | 2666           |                                           |
| Resident                |         | 404                 | 194     | 87  | 13   | 294   | 72.8%             | 6.6              | 1942           |                                           |
| Nonresident             |         | 139                 | 78      | 56  | 0    | 134   | 96.4%             | 5.4              | 724            |                                           |

TABLE I-H (Continued)  
**MULE DEER** HERD UNIT REPORT

| HERD                   | TYPE    | ACTIVE<br>LICS/HTRS | HARVEST |      |      |       | HUNTER<br>SUCCESS | DAYS/<br>HARVEST | HUNTER<br>DAYS | LICENSES<br>SOLD<br>(cross hunt<br>incl.) |
|------------------------|---------|---------------------|---------|------|------|-------|-------------------|------------------|----------------|-------------------------------------------|
|                        |         |                     | BUCK    | DOE  | FAWN | TOTAL |                   |                  |                |                                           |
| 215 Upper Shoshone     | D/F     | 247                 | 0       | 196  | 15   | 211   | 85.4%             | 4.3              | 916            | 328                                       |
|                        | General | 1964                | 1092    | 73   | 12   | 1177  | 59.9%             | 7.6              | 8958           |                                           |
| Total Hunters          |         | 2063                | 1092    | 269  | 27   | 1388  | 67.3%             | 7.1              | 9874           |                                           |
| Resident               |         | 1191                | 502     | 180  | 12   | 694   | 58.3%             | 8.6              | 5991           |                                           |
| Nonresident            |         | 872                 | 590     | 89   | 15   | 694   | 79.6%             | 5.6              | 3883           |                                           |
| 216 Clark's Fork       | Limited | 46                  | 39      | 0    | 0    | 39    | 84.8%             | 4.9              | 190            | 50                                        |
|                        | General | 1481                | 794     | 75   | 2    | 871   | 58.8%             | 6.4              | 5587           |                                           |
| Total Hunters          |         | 1527                | 833     | 75   | 2    | 910   | 59.6%             | 6.3              | 5777           |                                           |
| Resident               |         | 1172                | 585     | 72   | 2    | 659   | 56.2%             | 6.3              | 4162           |                                           |
| Nonresident            |         | 355                 | 248     | 3    | 0    | 251   | 70.7%             | 6.4              | 1615           |                                           |
| 319 Powder River       | D/F     | 1100                | 0       | 929  | 35   | 964   | 87.6%             | 4.0              | 3892           | 1711                                      |
|                        | General | 4349                | 2590    | 147  | 9    | 2746  | 63.1%             | 6.4              | 17711          |                                           |
| Total Hunters          |         | 5167                | 2590    | 1076 | 44   | 3710  | 71.8%             | 5.8              | 21603          |                                           |
| Resident               |         | 2185                | 757     | 518  | 34   | 1309  | 59.9%             | 7.1              | 9248           |                                           |
| Nonresident            |         | 2982                | 1833    | 558  | 10   | 2401  | 80.5%             | 5.1              | 12355          |                                           |
| 320 Pumpkin Buttes     | D/F     | 283                 | 0       | 202  | 14   | 216   | 76.3%             | 4.0              | 856            | 1187                                      |
|                        | General | 983                 | 613     | 18   | 0    | 631   | 64.2%             | 5.6              | 3529           |                                           |
| Total Hunters          |         | 1209                | 613     | 220  | 14   | 847   | 70.1%             | 5.2              | 4385           |                                           |
| Resident               |         | 377                 | 118     | 75   | 5    | 198   | 52.5%             | 7.4              | 1475           |                                           |
| Nonresident            |         | 832                 | 495     | 145  | 9    | 649   | 78.0%             | 4.5              | 2910           |                                           |
| 321 North Bighorn      | D/F     | 603                 | 0       | 491  | 19   | 510   | 84.6%             | 5.0              | 2539           | 1458                                      |
|                        | General | 3916                | 1389    | 170  | 8    | 1567  | 40.0%             | 12.2             | 19123          |                                           |
| Total Hunters          |         | 4348                | 1389    | 661  | 27   | 2077  | 47.8%             | 10.4             | 21662          |                                           |
| Resident               |         | 2557                | 592     | 328  | 20   | 940   | 36.8%             | 15.1             | 14206          |                                           |
| Nonresident            |         | 1791                | 797     | 333  | 7    | 1137  | 63.5%             | 6.6              | 7456           |                                           |
| 322 Upper Powder River | D/F     | 264                 | 0       | 174  | 9    | 183   | 69.3%             | 6.5              | 1198           | 418                                       |
|                        | General | 1650                | 1003    | 87   | 4    | 1094  | 66.3%             | 6.7              | 7333           |                                           |
| Total Hunters          |         | 1797                | 1003    | 261  | 13   | 1277  | 71.1%             | 6.7              | 8531           |                                           |
| Resident               |         | 454                 | 175     | 81   | 0    | 256   | 56.4%             | 9.0              | 2312           |                                           |
| Nonresident            |         | 1343                | 828     | 180  | 13   | 1021  | 76.0%             | 6.1              | 6219           |                                           |
| 423 Uinta              | General | 2176                | 1018    | 0    | 0    | 1018  | 46.8%             | 9.5              | 9648           |                                           |
| Total Hunters          |         | 2176                | 1018    | 0    | 0    | 1018  | 46.8%             | 9.5              | 9648           |                                           |
| Resident               |         | 1849                | 805     | 0    | 0    | 805   | 43.5%             | 10.2             | 8232           |                                           |
| Nonresident            |         | 327                 | 213     | 0    | 0    | 213   | 65.1%             | 6.6              | 1416           |                                           |
| 424 South Rock Springs | Limited | 449                 | 351     | 0    | 0    | 351   | 78.2%             | 6.9              | 2424           | 481                                       |
| Total Hunters          |         | 449                 | 351     | 0    | 0    | 351   | 78.2%             | 6.9              | 2424           |                                           |
| Resident               |         | 357                 | 286     | 0    | 0    | 286   | 80.1%             | 6.5              | 1867           |                                           |
| Nonresident            |         | 92                  | 65      | 0    | 0    | 65    | 70.7%             | 8.6              | 557            |                                           |
| 427 Baggs              | D/F     | 519                 | 0       | 418  | 13   | 431   | 83.0%             | 5.8              | 2488           | 659                                       |
|                        | Limited | 176                 | 123     | 6    | 0    | 129   | 73.3%             | 7.0              | 909            | 183                                       |
|                        | General | 3153                | 1842    | 206  | 24   | 2072  | 65.7%             | 6.9              | 14333          |                                           |
| Total Hunters          |         | 3670                | 1965    | 630  | 37   | 2632  | 71.7%             | 6.7              | 17730          |                                           |
| Resident               |         | 2375                | 1139    | 379  | 23   | 1541  | 64.9%             | 7.3              | 11207          |                                           |
| Nonresident            |         | 1295                | 826     | 251  | 14   | 1091  | 84.2%             | 6.0              | 6523           |                                           |
| 430 Steamboat          | Limited | 36                  | 0       | 25   | 2    | 27    | 75.0%             | 2.9              | 78             | 55                                        |
|                        | General | 1034                | 357     | 0    | 0    | 357   | 34.5%             | 10.3             | 3678           |                                           |
| Total Hunters          |         | 1070                | 357     | 25   | 2    | 384   | 35.9%             | 9.8              | 3756           |                                           |
| Resident               |         | 987                 | 310     | 25   | 2    | 337   | 34.1%             | 10.1             | 3417           |                                           |
| Nonresident            |         | 83                  | 47      | 0    | 0    | 47    | 56.6%             | 7.2              | 339            |                                           |

TABLE I-H (Continued)  
**MULE DEER** HERD UNIT REPORT

| HERD                  | TYPE          | ACTIVE<br>LICS/HTRS | HARVEST |     |      |       | HUNTER<br>SUCCESS | DAYS/<br>HARVEST | HUNTER<br>DAYS | LICENSES<br>SOLD      |
|-----------------------|---------------|---------------------|---------|-----|------|-------|-------------------|------------------|----------------|-----------------------|
|                       |               |                     | BUCK    | DOE | FAWN | TOTAL |                   |                  |                | (cross hunt<br>incl.) |
| 534 Goshen Rim        | D/F           | 136                 | 0       | 88  | 3    | 91    | 66.9%             | 5.7              | 521            | 168                   |
|                       | Limited       | 21                  | 9       | 4   | 0    | 13    | 61.9%             | 7.1              | 92             | 28                    |
|                       | General       | 1526                | 717     | 57  | 15   | 789   | 51.7%             | 7.5              | 5908           |                       |
|                       | Total Hunters | 1622                | 726     | 149 | 18   | 893   | 55.1%             | 7.3              | 6521           |                       |
|                       | Resident      | 1187                | 464     | 107 | 15   | 586   | 49.4%             | 8.2              | 4798           |                       |
|                       | Nonresident   | 435                 | 262     | 42  | 3    | 307   | 70.6%             | 5.6              | 1723           |                       |
| 537 Laramie Mountains | D/F           | 219                 | 0       | 132 | 19   | 151   | 68.9%             | 5.4              | 811            | 278                   |
|                       | Limited       | 352                 | 227     | 27  | 0    | 254   | 72.2%             | 7.0              | 1773           | 411                   |
|                       | General       | 1981                | 1175    | 0   | 0    | 1175  | 59.3%             | 7.1              | 8333           |                       |
|                       | Total Hunters | 2474                | 1402    | 159 | 19   | 1580  | 63.9%             | 6.9              | 10917          |                       |
|                       | Resident      | 1619                | 821     | 107 | 8    | 936   | 57.8%             | 7.9              | 7360           |                       |
|                       | Nonresident   | 855                 | 581     | 52  | 11   | 644   | 75.3%             | 5.5              | 3557           |                       |
| 539 Sheep Mountain    | D/F           | 5                   | 0       | 2   | 0    | 2     | 40.0%             | 11.5             | 23             | 25                    |
|                       | General       | 2077                | 517     | 7   | 4    | 528   | 25.4%             | 18.1             | 9546           |                       |
|                       | Total Hunters | 2082                | 517     | 9   | 4    | 530   | 25.5%             | 18.1             | 9569           |                       |
|                       | Resident      | 1656                | 351     | 7   | 4    | 362   | 21.9%             | 21.4             | 7730           |                       |
|                       | Nonresident   | 426                 | 166     | 2   | 0    | 168   | 39.4%             | 10.9             | 1839           |                       |
| 540 Shirley Mountain  | D/F           | 71                  | 0       | 54  | 4    | 58    | 81.7%             | 3.9              | 225            | 100                   |
|                       | General       | 879                 | 511     | 0   | 0    | 511   | 58.1%             | 6.7              | 3406           |                       |
|                       | Total Hunters | 924                 | 511     | 54  | 4    | 569   | 61.6%             | 6.4              | 3631           |                       |
|                       | Resident      | 478                 | 210     | 20  | 2    | 232   | 48.5%             | 5.8              | 1340           |                       |
|                       | Nonresident   | 446                 | 301     | 34  | 2    | 337   | 75.6%             | 6.8              | 2291           |                       |
| 541 Platte Valley     | D/F           | 158                 | 0       | 87  | 14   | 101   | 63.9%             | 7.5              | 756            | 203                   |
|                       | Limited       | 27                  | 27      | 0   | 0    | 27    | 100.0%            | 5.0              | 136            | 27                    |
|                       | General       | 4277                | 1183    | 467 | 39   | 1689  | 39.5%             | 12.7             | 21498          |                       |
|                       | Total Hunters | 4357                | 1210    | 554 | 53   | 1817  | 41.7%             | 12.3             | 22390          |                       |
|                       | Resident      | 2977                | 694     | 361 | 40   | 1095  | 36.8%             | 13.8             | 15103          |                       |
|                       | Nonresident   | 1380                | 516     | 193 | 13   | 722   | 52.3%             | 10.1             | 7287           |                       |
| 642 Dubois            | D/F           | 174                 | 0       | 150 | 13   | 163   | 93.7%             | 3.2              | 526            | 250                   |
|                       | Limited       | 101                 | 80      | 2   | 0    | 82    | 81.2%             | 8.2              | 674            | 107                   |
|                       | General       | 1287                | 483     | 0   | 0    | 483   | 37.5%             | 16.2             | 7842           |                       |
|                       | Total Hunters | 1466                | 563     | 152 | 13   | 728   | 49.7%             | 12.4             | 9042           |                       |
|                       | Resident      | 1212                | 446     | 125 | 13   | 584   | 48.2%             | 13.2             | 7689           |                       |
|                       | Nonresident   | 254                 | 117     | 27  | 0    | 144   | 56.7%             | 9.4              | 1353           |                       |
| 643 Project           | D/F           | 278                 | 0       | 195 | 33   | 228   | 82.0%             | 4.1              | 945            | 330                   |
|                       | Limited       | 225                 | 170     | 14  | 0    | 184   | 81.8%             | 5.1              | 943            | 255                   |
|                       | General       | 172                 | 54      | 12  | 2    | 68    | 39.5%             | 8.3              | 563            |                       |
|                       | Total Hunters | 572                 | 224     | 221 | 35   | 480   | 83.9%             | 5.1              | 2451           |                       |
|                       | Resident      | 488                 | 182     | 194 | 29   | 405   | 83.0%             | 5.0              | 2017           |                       |
|                       | Nonresident   | 84                  | 42      | 27  | 6    | 75    | 89.3%             | 5.8              | 434            |                       |
| 644 South Wind River  | D/F           | 92                  | 0       | 74  | 2    | 76    | 82.6%             | 5.2              | 392            | 104                   |
|                       | General       | 1680                | 808     | 0   | 0    | 808   | 48.1%             | 8.2              | 6639           |                       |
|                       | Total Hunters | 1732                | 808     | 74  | 2    | 884   | 51.0%             | 8.0              | 7031           |                       |
|                       | Resident      | 1470                | 664     | 65  | 2    | 731   | 49.7%             | 8.1              | 5930           |                       |
|                       | Nonresident   | 262                 | 144     | 9   | 0    | 153   | 58.4%             | 7.2              | 1101           |                       |
| 646 Sweetwater        | D/F           | 132                 | 0       | 101 | 15   | 116   | 87.9%             | 1.8              | 205            | 162                   |
|                       | General       | 996                 | 496     | 0   | 0    | 496   | 49.8%             | 6.8              | 3351           |                       |
|                       | Total Hunters | 1076                | 496     | 101 | 15   | 612   | 56.9%             | 5.8              | 3556           |                       |
|                       | Resident      | 805                 | 326     | 82  | 8    | 416   | 51.7%             | 5.9              | 2472           |                       |
|                       | Nonresident   | 271                 | 170     | 19  | 7    | 196   | 72.3%             | 5.5              | 1084           |                       |



TABLE I-H (Continued)  
**MULE DEER** HERD UNIT REPORT

| HERD                   | TYPE    | ACTIVE<br>LICS/HTRS | HARVEST |      |      |       | HUNTER<br>SUCCESS | DAYS/<br>HARVEST | HUNTER<br>DAYS | LICENSES<br>SOLD<br>(cross hunt<br>incl.) |
|------------------------|---------|---------------------|---------|------|------|-------|-------------------|------------------|----------------|-------------------------------------------|
|                        |         |                     | BUCK    | DOE  | FAWN | TOTAL |                   |                  |                |                                           |
| 647 Ferris             | Limited | 275                 | 226     | 0    | 0    | 226   | 82.2%             | 6.3              | 1427           | 301                                       |
| Total Hunters          |         | 275                 | 226     | 0    | 0    | 226   | 82.2%             | 6.3              | 1427           |                                           |
| Resident               |         | 222                 | 184     | 0    | 0    | 184   | 82.9%             | 5.1              | 942            |                                           |
| Nonresident            |         | 53                  | 42      | 0    | 0    | 42    | 79.2%             | 11.5             | 485            |                                           |
| 648 Beaver Rim         | Limited | 73                  | 64      | 0    | 0    | 64    | 87.7%             | 5.8              | 368            | 75                                        |
| Total Hunters          |         | 73                  | 64      | 0    | 0    | 64    | 87.7%             | 5.8              | 368            |                                           |
| Resident               |         | 58                  | 51      | 0    | 0    | 51    | 87.9%             | 5.7              | 291            |                                           |
| Nonresident            |         | 15                  | 13      | 0    | 0    | 13    | 86.7%             | 5.9              | 77             |                                           |
| 650 Chain Lakes        | General | 108                 | 60      | 0    | 0    | 60    | 55.6%             | 5.6              | 338            |                                           |
| Total Hunters          |         | 108                 | 60      | 0    | 0    | 60    | 55.6%             | 5.6              | 338            |                                           |
| Resident               |         | 68                  | 33      | 0    | 0    | 33    | 48.5%             | 5.7              | 188            |                                           |
| Nonresident            |         | 40                  | 27      | 0    | 0    | 27    | 67.5%             | 5.6              | 150            |                                           |
| 751 Black Hills        | D/F     | 1755                | 0       | 971  | 49   | 1020  | 58.1%             | 5.3              | 5437           | 3391                                      |
|                        | General | 5523                | 2175    | 165  | 12   | 2352  | 42.6%             | 7.5              | 17711          |                                           |
| Total Hunters          |         | 6917                | 2175    | 1136 | 61   | 3372  | 48.7%             | 6.9              | 23148          |                                           |
| Resident               |         | 2437                | 769     | 287  | 8    | 1064  | 43.7%             | 8.6              | 9134           |                                           |
| Nonresident            |         | 4480                | 1406    | 849  | 53   | 2308  | 51.5%             | 6.1              | 14014          |                                           |
| 752 Thunder Basin      | D/F     | 384                 | 0       | 253  | 18   | 271   | 70.6%             | 5.8              | 1584           | 495                                       |
|                        | General | 1689                | 966     | 114  | 4    | 1084  | 64.2%             | 6.2              | 6717           |                                           |
| Total Hunters          |         | 1942                | 966     | 367  | 22   | 1355  | 69.8%             | 6.1              | 8301           |                                           |
| Resident               |         | 768                 | 276     | 108  | 0    | 384   | 50.0%             | 9.3              | 3581           |                                           |
| Nonresident            |         | 1174                | 690     | 259  | 22   | 971   | 82.7%             | 4.9              | 4720           |                                           |
| 753 Lance Creek        | D/F     | 420                 | 0       | 305  | 17   | 322   | 76.7%             | 4.8              | 1542           | 500                                       |
|                        | General | 1605                | 983     | 101  | 4    | 1088  | 67.8%             | 6.1              | 6669           |                                           |
| Total Hunters          |         | 1914                | 983     | 406  | 21   | 1410  | 73.7%             | 5.8              | 8211           |                                           |
| Resident               |         | 454                 | 187     | 126  | 4    | 317   | 69.8%             | 7.0              | 2218           |                                           |
| Nonresident            |         | 1460                | 796     | 280  | 17   | 1093  | 74.9%             | 5.5              | 5993           |                                           |
| 755 North Converse     | D/F     | 230                 | 0       | 158  | 4    | 162   | 70.4%             | 4.2              | 677            | 286                                       |
|                        | Limited | 626                 | 506     | 28   | 9    | 543   | 86.7%             | 3.3              | 1780           | 749                                       |
| Total Hunters          |         | 794                 | 506     | 186  | 13   | 705   | 88.8%             | 3.5              | 2457           |                                           |
| Resident               |         | 168                 | 49      | 63   | 13   | 125   | 74.4%             | 4.2              | 529            |                                           |
| Nonresident            |         | 626                 | 457     | 123  | 0    | 580   | 92.7%             | 3.3              | 1928           |                                           |
| 756 South Converse     | D/F     | 157                 | 0       | 106  | 7    | 113   | 72.0%             | 5.2              | 583            | 196                                       |
|                        | General | 1108                | 616     | 0    | 0    | 616   | 55.6%             | 6.9              | 4224           |                                           |
| Total Hunters          |         | 1185                | 616     | 106  | 7    | 729   | 61.5%             | 6.6              | 4807           |                                           |
| Resident               |         | 539                 | 265     | 21   | 4    | 290   | 53.8%             | 7.2              | 2088           |                                           |
| Nonresident            |         | 646                 | 351     | 85   | 3    | 439   | 68.0%             | 6.2              | 2719           |                                           |
| 757 Bates Hole/Hat Six | D/F     | 167                 | 0       | 121  | 25   | 146   | 87.4%             | 4.1              | 594            | 200                                       |
|                        | General | 1050                | 512     | 0    | 0    | 512   | 48.8%             | 8.2              | 4191           |                                           |
| Total Hunters          |         | 1164                | 512     | 121  | 25   | 658   | 56.5%             | 7.3              | 4785           |                                           |
| Resident               |         | 785                 | 310     | 47   | 3    | 360   | 45.9%             | 8.6              | 3112           |                                           |
| Nonresident            |         | 379                 | 202     | 74   | 22   | 298   | 78.6%             | 5.6              | 1673           |                                           |
| 758 Rattlesnake        | D/F     | 282                 | 0       | 203  | 13   | 216   | 76.6%             | 6.6              | 1426           | 350                                       |
|                        | Limited | 278                 | 234     | 0    | 0    | 234   | 84.2%             | 4.3              | 998            | 278                                       |
|                        | General | 279                 | 144     | 0    | 0    | 144   | 51.6%             | 6.3              | 909            |                                           |
| Total Hunters          |         | 743                 | 378     | 203  | 13   | 594   | 79.9%             | 5.6              | 3333           |                                           |
| Resident               |         | 632                 | 317     | 175  | 9    | 501   | 79.3%             | 5.9              | 2980           |                                           |
| Nonresident            |         | 111                 | 61      | 28   | 4    | 93    | 83.8%             | 3.8              | 353            |                                           |

TABLE I-H (Continued)

**MULE DEER** HERD UNIT REPORT

| HERD              | TYPE           | ACTIVE<br>LICS/HTRS | HARVEST |     |      |       | HUNTER<br>SUCCESS | DAYS/<br>HARVEST | HUNTER<br>DAYS | LICENSES<br>SOLD      |
|-------------------|----------------|---------------------|---------|-----|------|-------|-------------------|------------------|----------------|-----------------------|
|                   |                |                     | BUCK    | DOE | FAWN | TOTAL |                   |                  |                | (cross hunt<br>incl.) |
| 759 North Natrona | D/F<br>Limited | 134                 | 0       | 99  | 7    | 106   | 79.1%             | 4.4              | 470            | 151                   |
|                   |                | 294                 | 226     | 4   | 0    | 230   | 78.2%             | 5.5              | 1271           | 351                   |
|                   | Total Hunters  | 381                 | 226     | 103 | 7    | 336   | 88.2%             | 5.2              | 1741           |                       |
|                   | Resident       | 274                 | 166     | 70  | 7    | 243   | 88.7%             | 5.1              | 1241           |                       |
|                   | Nonresident    | 107                 | 60      | 33  | 0    | 93    | 86.9%             | 5.4              | 500            |                       |

TABLE II-A  
**WHITE-TAILED DEER**  
**HARVEST, HUNTING PRESSURE, HUNTER SUCCESS**  
 BY HUNT AREA  
**2007**

| AREA<br>(cross hunt areas) | TYPE       | ACTIVE<br>LICS/HTRS | HARVEST |     |      |       | HUNTER<br>SUCCESS | DAYS/<br>HARVEST | HUNTER<br>DAYS | LICENSES<br>SOLD<br>(cross hunt<br>incl.) |
|----------------------------|------------|---------------------|---------|-----|------|-------|-------------------|------------------|----------------|-------------------------------------------|
|                            |            |                     | BUCK    | DOE | FAWN | TOTAL |                   |                  |                |                                           |
| 1 Crook                    |            |                     |         |     |      |       |                   |                  |                |                                           |
| (2, 3)                     | D/F Type 6 | 639                 | 0       | 460 | 37   | 497   | 77.8%             | 5.9              | 2955           | 2722                                      |
|                            | General    | 1685                | 853     | 57  | 5    | 915   | 54.3%             | 6.3              | 5754           |                                           |
| Pooled Total               |            | 2170                | 853     | 517 | 42   | 1412  | 65.1%             | 6.2              | 8709           |                                           |
| Pooled Resident            |            | 922                 | 319     | 201 | 5    | 525   | 56.9%             | 9.0              | 4700           |                                           |
| Pooled Nonresident         |            | 1248                | 534     | 316 | 37   | 887   | 71.1%             | 4.5              | 4009           |                                           |
| 2 Bearlodge                |            |                     |         |     |      |       |                   |                  |                |                                           |
| (1, 3)                     | D/F Type 6 | 1264                | 0       | 846 | 49   | 895   | 70.8%             | 5.4              | 4836           | 2722                                      |
|                            | General    | 4456                | 2251    | 122 | 47   | 2420  | 54.3%             | 6.8              | 16520          |                                           |
| Pooled Total               |            | 5476                | 2251    | 968 | 96   | 3315  | 60.5%             | 6.4              | 21356          |                                           |
| Pooled Resident            |            | 2644                | 975     | 458 | 60   | 1493  | 56.5%             | 8.0              | 11948          |                                           |
| Pooled Nonresident         |            | 2832                | 1276    | 510 | 36   | 1822  | 64.3%             | 5.2              | 9408           |                                           |
| 3 Keyhole                  |            |                     |         |     |      |       |                   |                  |                |                                           |
| (1, 2)                     | D/F Type 6 | 179                 | 0       | 74  | 0    | 74    | 41.3%             | 5.8              | 430            | 2722                                      |
|                            | General    | 575                 | 221     | 28  | 16   | 265   | 46.1%             | 7.4              | 1954           |                                           |
| Pooled Total               |            | 743                 | 221     | 102 | 16   | 339   | 45.6%             | 7.0              | 2384           |                                           |
| Pooled Resident            |            | 352                 | 94      | 21  | 13   | 128   | 36.4%             | 8.4              | 1079           |                                           |
| Pooled Nonresident         |            | 391                 | 127     | 81  | 3    | 211   | 54.0%             | 6.2              | 1305           |                                           |
| 4 Sand Creek               |            |                     |         |     |      |       |                   |                  |                |                                           |
|                            | D/F Type 6 | 251                 | 0       | 171 | 15   | 186   | 74.1%             | 4.8              | 887            | 324                                       |
|                            | General    | 1364                | 532     | 15  | 0    | 547   | 40.1%             | 11.0             | 6006           |                                           |
| Pooled Total               |            | 1500                | 532     | 186 | 15   | 733   | 48.9%             | 9.4              | 6893           |                                           |
| Pooled Resident            |            | 925                 | 275     | 35  | 0    | 310   | 33.5%             | 13.6             | 4214           |                                           |
| Pooled Nonresident         |            | 575                 | 257     | 151 | 15   | 423   | 73.6%             | 6.3              | 2679           |                                           |
| 5 Inyan Kara               |            |                     |         |     |      |       |                   |                  |                |                                           |
|                            | D/F Type 6 | 49                  | 0       | 16  | 3    | 19    | 38.8%             | 5.2              | 98             | 112                                       |
|                            | General    | 330                 | 103     | 14  | 0    | 117   | 35.5%             | 10.3             | 1210           |                                           |
| Pooled Total               |            | 362                 | 103     | 30  | 3    | 136   | 37.6%             | 9.6              | 1308           |                                           |
| Pooled Resident            |            | 221                 | 62      | 13  | 3    | 78    | 35.3%             | 11.9             | 932            |                                           |
| Pooled Nonresident         |            | 141                 | 41      | 17  | 0    | 58    | 41.1%             | 6.5              | 376            |                                           |
| 6 Skull Creek              |            |                     |         |     |      |       |                   |                  |                |                                           |
| (9)                        | D/F Type 6 | 109                 | 0       | 53  | 5    | 58    | 53.2%             | 7.7              | 445            | 233                                       |
|                            | General    | 368                 | 122     | 10  | 0    | 132   | 35.9%             | 8.7              | 1152           |                                           |
| Pooled Total               |            | 428                 | 122     | 63  | 5    | 190   | 44.4%             | 8.4              | 1597           |                                           |
| Pooled Resident            |            | 262                 | 64      | 30  | 3    | 97    | 37.0%             | 9.1              | 883            |                                           |
| Pooled Nonresident         |            | 166                 | 58      | 33  | 2    | 93    | 56.0%             | 7.7              | 714            |                                           |
| 7 South Osage              |            |                     |         |     |      |       |                   |                  |                |                                           |
|                            | General    | 62                  | 9       | 0   | 0    | 9     | 14.5%             | 9.7              | 87             |                                           |
| Pooled Total               |            | 62                  | 9       | 0   | 0    | 9     | 14.5%             | 9.7              | 87             |                                           |
| Pooled Resident            |            | 30                  | 2       | 0   | 0    | 2     | 6.7%              | 19.5             | 39             |                                           |
| Pooled Nonresident         |            | 32                  | 7       | 0   | 0    | 7     | 21.9%             | 6.9              | 48             |                                           |
| 8 Upton-Four Horse         |            |                     |         |     |      |       |                   |                  |                |                                           |
|                            | D/F Type 6 | 14                  | 0       | 6   | 0    | 6     | 42.9%             | 6.3              | 38             | 96                                        |
|                            | General    | 46                  | 4       | 0   | 0    | 4     | 8.7%              | 22.5             | 90             |                                           |
| Pooled Total               |            | 57                  | 4       | 6   | 0    | 10    | 17.5%             | 12.8             | 128            |                                           |
| Pooled Resident            |            | 25                  | 0       | 0   | 0    | 0     | 0.0%              | 0.0              | 51             |                                           |
| Pooled Nonresident         |            | 32                  | 4       | 6   | 0    | 10    | 31.3%             | 7.7              | 77             |                                           |
| 9 Blacktail Creek          |            |                     |         |     |      |       |                   |                  |                |                                           |
| (6)                        | D/F Type 6 | 33                  | 0       | 8   | 3    | 11    | 33.3%             | 9.5              | 104            | 233                                       |
|                            | General    | 57                  | 11      | 0   | 0    | 11    | 19.3%             | 11.8             | 130            |                                           |
| Pooled Total               |            | 79                  | 11      | 8   | 3    | 22    | 27.8%             | 10.6             | 234            |                                           |
| Pooled Resident            |            | 33                  | 4       | 6   | 3    | 13    | 39.4%             | 13.1             | 170            |                                           |
| Pooled Nonresident         |            | 46                  | 7       | 2   | 0    | 9     | 19.6%             | 7.1              | 64             |                                           |

TABLE II-A (Continued)

## WHITE-TAILED DEER HUNT AREA REPORT

| AREA<br>(cross hunt areas) | TYPE               | ACTIVE<br>LICS/HTRS | HARVEST |     |      |       | HUNTER<br>SUCCESS | DAYS/<br>HARVEST | HUNTER<br>DAYS | LICENSES<br>SOLD<br>(cross hunt<br>incl.) |
|----------------------------|--------------------|---------------------|---------|-----|------|-------|-------------------|------------------|----------------|-------------------------------------------|
|                            |                    |                     | BUCK    | DOE | FAWN | TOTAL |                   |                  |                |                                           |
| 10 Teckla                  |                    |                     |         |     |      |       |                   |                  |                |                                           |
|                            | D/F Type 6         | 8                   | 0       | 6   | 0    | 6     | 75.0%             | 1.3              | 8              | 32                                        |
|                            | General            | 16                  | 0       | 0   | 0    | 0     | 0.0%              | 0.0              | 20             |                                           |
|                            | Pooled Total       | 20                  | 0       | 6   | 0    | 6     | 30.0%             | 4.7              | 28             |                                           |
|                            | Pooled Resident    | 11                  | 0       | 6   | 0    | 6     | 54.5%             | 2.3              | 14             |                                           |
|                            | Pooled Nonresident | 9                   | 0       | 0   | 0    | 0     | 0.0%              | 0.0              | 14             |                                           |
| 11 Mule Creek              |                    |                     |         |     |      |       |                   |                  |                |                                           |
| (12, 13, 14, 15, 167)      | Limited Type 1     | 84                  | 47      | 8   | 0    | 55    | 65.5%             | 6.5              | 356            | 300                                       |
|                            | D/F Type 6         | 33                  | 0       | 17  | 4    | 21    | 63.6%             | 2.4              | 50             | 134                                       |
| (12, 13, 14, 15, 167)      | D/F Type 7         | 59                  | 0       | 35  | 12   | 47    | 79.7%             | 4.8              | 225            | 158                                       |
|                            | General            | 90                  | 25      | 4   | 4    | 33    | 36.7%             | 3.8              | 124            |                                           |
|                            | Pooled Total       | 233                 | 72      | 64  | 20   | 156   | 67.0%             | 4.8              | 755            |                                           |
|                            | Pooled Resident    | 75                  | 29      | 22  | 9    | 60    | 80.0%             | 6.9              | 416            |                                           |
|                            | Pooled Nonresident | 158                 | 43      | 42  | 11   | 96    | 60.8%             | 3.5              | 339            |                                           |
| 12 Hat Creek               |                    |                     |         |     |      |       |                   |                  |                |                                           |
| (11, 13, 14, 15, 167)      | Limited Type 1     | 34                  | 10      | 2   | 0    | 12    | 35.3%             | 9.7              | 116            | 300                                       |
| (13, 14)                   | D/F Type 6         | 24                  | 0       | 0   | 0    | 0     | 0.0%              | 0.0              | 36             | 500                                       |
| (11, 13, 14, 15, 167)      | D/F Type 7         | 15                  | 0       | 10  | 2    | 12    | 80.0%             | 5.7              | 68             | 158                                       |
|                            | General            | 81                  | 25      | 0   | 0    | 25    | 30.9%             | 7.6              | 191            |                                           |
|                            | Pooled Total       | 140                 | 35      | 12  | 2    | 49    | 35.0%             | 8.4              | 411            |                                           |
|                            | Pooled Resident    | 45                  | 4       | 2   | 2    | 8     | 17.8%             | 13.9             | 111            |                                           |
|                            | Pooled Nonresident | 95                  | 31      | 10  | 0    | 41    | 43.2%             | 7.3              | 300            |                                           |
| 13 Lusk                    |                    |                     |         |     |      |       |                   |                  |                |                                           |
| (11, 12, 14, 15, 167)      | Limited Type 1     | 110                 | 56      | 13  | 7    | 76    | 69.1%             | 5.8              | 444            | 300                                       |
| (12, 14)                   | D/F Type 6         | 51                  | 0       | 23  | 9    | 32    | 62.7%             | 3.8              | 121            | 500                                       |
| (11, 12, 14, 15, 167)      | D/F Type 7         | 53                  | 0       | 24  | 16   | 40    | 75.5%             | 5.8              | 232            | 158                                       |
|                            | General            | 153                 | 26      | 3   | 4    | 33    | 21.6%             | 6.8              | 224            |                                           |
|                            | Pooled Total       | 320                 | 82      | 63  | 36   | 181   | 56.6%             | 5.6              | 1021           |                                           |
|                            | Pooled Resident    | 159                 | 44      | 44  | 25   | 113   | 71.1%             | 5.8              | 661            |                                           |
|                            | Pooled Nonresident | 161                 | 38      | 19  | 11   | 68    | 42.2%             | 5.3              | 360            |                                           |
| 14 Twenty Mile             |                    |                     |         |     |      |       |                   |                  |                |                                           |
| (11, 12, 13, 15, 167)      | Limited Type 1     | 24                  | 13      | 5   | 0    | 18    | 75.0%             | 7.7              | 139            | 300                                       |
| (12, 13)                   | D/F Type 6         | 9                   | 0       | 4   | 0    | 4     | 44.4%             | 3.5              | 14             | 500                                       |
| (11, 12, 13, 15, 167)      | D/F Type 7         | 10                  | 0       | 5   | 0    | 5     | 50.0%             | 8.8              | 44             | 158                                       |
|                            | General            | 45                  | 4       | 0   | 0    | 4     | 8.9%              | 41.8             | 167            |                                           |
|                            | Pooled Total       | 80                  | 17      | 14  | 0    | 31    | 38.8%             | 11.7             | 364            |                                           |
|                            | Pooled Resident    | 45                  | 11      | 4   | 0    | 15    | 33.3%             | 17.3             | 260            |                                           |
|                            | Pooled Nonresident | 35                  | 6       | 10  | 0    | 16    | 45.7%             | 6.5              | 104            |                                           |
| 15 South Keeline           |                    |                     |         |     |      |       |                   |                  |                |                                           |
| (11, 12, 13, 14, 167)      | Limited Type 1     | 36                  | 25      | 0   | 0    | 25    | 69.4%             | 9.8              | 246            | 300                                       |
|                            | D/F Type 6         | 0                   | 0       | 0   | 0    | 0     | 0.0%              | 0.0              | 0              | 18                                        |
| (11, 12, 13, 14, 167)      | D/F Type 7         | 10                  | 0       | 10  | 0    | 10    | 100.0%            | 6.2              | 62             | 158                                       |
|                            | General            | 26                  | 6       | 0   | 0    | 6     | 23.1%             | 8.2              | 49             |                                           |
|                            | Pooled Total       | 63                  | 31      | 10  | 0    | 41    | 65.1%             | 8.7              | 357            |                                           |
|                            | Pooled Resident    | 48                  | 25      | 5   | 0    | 30    | 62.5%             | 11.0             | 329            |                                           |
|                            | Pooled Nonresident | 15                  | 6       | 5   | 0    | 11    | 73.3%             | 2.5              | 28             |                                           |
| 16 Meadowdale/Jay Em       |                    |                     |         |     |      |       |                   |                  |                |                                           |
| (55)                       | Limited Type 1     | 38                  | 12      | 4   | 0    | 16    | 42.1%             | 14.9             | 238            | 125                                       |
|                            | Limited Type 2     | 9                   | 2       | 4   | 0    | 6     | 66.7%             | 4.5              | 27             | 28                                        |
|                            | General            | 81                  | 0       | 0   | 0    | 0     | 0.0%              | 0.0              | 170            |                                           |
|                            | Pooled Total       | 128                 | 14      | 8   | 0    | 22    | 17.2%             | 19.8             | 435            |                                           |
|                            | Pooled Resident    | 92                  | 10      | 8   | 0    | 18    | 19.6%             | 19.8             | 356            |                                           |
|                            | Pooled Nonresident | 36                  | 4       | 0   | 0    | 4     | 11.1%             | 19.8             | 79             |                                           |

TABLE II-A (Continued)

## WHITE-TAILED DEER HUNT AREA REPORT

| AREA<br>(cross hunt areas)                | TYPE           | ACTIVE<br>LICS/HTRS | HARVEST |      |      |       | HUNTER<br>SUCCESS | DAYS/<br>HARVEST | HUNTER<br>DAYS | LICENSES<br>SOLD<br>(cross hunt<br>incl.) |
|-------------------------------------------|----------------|---------------------|---------|------|------|-------|-------------------|------------------|----------------|-------------------------------------------|
|                                           |                |                     | BUCK    | DOE  | FAWN | TOTAL |                   |                  |                |                                           |
| 17 Northwest Gillette<br>(18, 19, 20, 21) | D/F Type 6     | 54                  | 0       | 0    | 6    | 6     | 11.1%             | 16.3             | 98             | 928                                       |
|                                           | General        | 231                 | 74      | 10   | 0    | 84    | 36.4%             | 7.3              | 609            |                                           |
| Pooled Total                              |                | 285                 | 74      | 10   | 6    | 90    | 31.6%             | 7.9              | 707            |                                           |
| Pooled Resident                           |                | 181                 | 45      | 10   | 0    | 55    | 30.4%             | 8.6              | 473            |                                           |
| Pooled Nonresident                        |                | 104                 | 29      | 0    | 6    | 35    | 33.7%             | 6.7              | 234            |                                           |
| 18 Campbell<br>(17, 19, 20, 21)           | D/F Type 6     | 64                  | 0       | 17   | 13   | 30    | 46.9%             | 5.3              | 158            | 928                                       |
|                                           | General        | 301                 | 43      | 0    | 0    | 43    | 14.3%             | 11.1             | 476            |                                           |
| Pooled Total                              |                | 359                 | 43      | 17   | 13   | 73    | 20.3%             | 8.7              | 634            |                                           |
| Pooled Resident                           |                | 219                 | 14      | 11   | 0    | 25    | 11.4%             | 13.0             | 326            |                                           |
| Pooled Nonresident                        |                | 140                 | 29      | 6    | 13   | 48    | 34.3%             | 6.4              | 308            |                                           |
| 19 Pumpkin Buttes<br>(17, 18, 20, 21)     | D/F Type 6     | 7                   | 0       | 0    | 0    | 0     | 0.0%              | 0.0              | 19             | 928                                       |
|                                           | General        | 34                  | 9       | 4    | 0    | 13    | 38.2%             | 7.1              | 92             |                                           |
| Pooled Total                              |                | 41                  | 9       | 4    | 0    | 13    | 31.7%             | 8.5              | 111            |                                           |
| Pooled Resident                           |                | 24                  | 5       | 0    | 0    | 5     | 20.8%             | 15.6             | 78             |                                           |
| Pooled Nonresident                        |                | 17                  | 4       | 4    | 0    | 8     | 47.1%             | 4.1              | 33             |                                           |
| 20 Clarkelen<br>(17, 18, 19, 21)          | D/F Type 6     | 6                   | 0       | 0    | 0    | 0     | 0.0%              | 0.0              | 13             | 928                                       |
|                                           | General        | 29                  | 4       | 0    | 0    | 4     | 13.8%             | 17.5             | 70             |                                           |
| Pooled Total                              |                | 35                  | 4       | 0    | 0    | 4     | 11.4%             | 20.8             | 83             |                                           |
| Pooled Resident                           |                | 11                  | 0       | 0    | 0    | 0     | 0.0%              | 0.0              | 32             |                                           |
| Pooled Nonresident                        |                | 24                  | 4       | 0    | 0    | 4     | 16.7%             | 12.8             | 51             |                                           |
| 21 Thunder Basin<br>(17, 18, 19, 20)      | D/F Type 6     | 13                  | 0       | 6    | 0    | 6     | 46.2%             | 2.3              | 14             | 928                                       |
|                                           | General        | 52                  | 0       | 4    | 0    | 4     | 7.7%              | 25.3             | 101            |                                           |
| Pooled Total                              |                | 65                  | 0       | 10   | 0    | 10    | 15.4%             | 11.5             | 115            |                                           |
| Pooled Resident                           |                | 42                  | 0       | 0    | 0    | 0     | 0.0%              | 0.0              | 83             |                                           |
| Pooled Nonresident                        |                | 23                  | 0       | 10   | 0    | 10    | 43.5%             | 3.2              | 32             |                                           |
| 22 Douglas<br>(158)                       | Limited Type 1 | 29                  | 0       | 4    | 0    | 4     | 13.8%             | 13.5             | 54             | 338                                       |
|                                           | D/F Type 6     | 25                  | 0       | 8    | 0    | 8     | 32.0%             | 5.8              | 46             | 286                                       |
|                                           | General        | 62                  | 20      | 10   | 4    | 34    | 54.8%             | 4.5              | 152            |                                           |
| Pooled Total                              |                | 109                 | 20      | 22   | 4    | 46    | 42.2%             | 5.5              | 252            |                                           |
| Pooled Resident                           |                | 51                  | 13      | 10   | 4    | 27    | 52.9%             | 4.7              | 127            |                                           |
| Pooled Nonresident                        |                | 58                  | 7       | 12   | 0    | 19    | 32.8%             | 6.6              | 125            |                                           |
| 23 Clearmont<br>(26)                      | Limited Type 3 | 20                  | 11      | 2    | 0    | 13    | 65.0%             | 5.8              | 75             | 43                                        |
| (26)                                      | D/F Type 6     | 159                 | 0       | 48   | 9    | 57    | 35.8%             | 6.5              | 372            | 783                                       |
| (26)                                      | D/F Type 7     | 122                 | 0       | 77   | 13   | 90    | 73.8%             | 6.1              | 549            | 240                                       |
|                                           | General        | 476                 | 191     | 30   | 16   | 237   | 49.8%             | 7.5              | 1774           |                                           |
| Pooled Total                              |                | 659                 | 202     | 157  | 38   | 397   | 60.2%             | 7.0              | 2770           |                                           |
| Pooled Resident                           |                | 441                 | 155     | 104  | 30   | 289   | 65.5%             | 7.5              | 2163           |                                           |
| Pooled Nonresident                        |                | 218                 | 47      | 53   | 8    | 108   | 49.5%             | 5.6              | 607            |                                           |
| 24 Sheridan<br>(27)                       | Limited Type 3 | 56                  | 44      | 5    | 2    | 51    | 91.1%             | 3.5              | 178            | 102                                       |
|                                           | D/F Type 6     | 511                 | 0       | 299  | 18   | 317   | 62.0%             | 6.4              | 2024           | 998                                       |
|                                           | D/F Type 7     | 949                 | 0       | 650  | 104  | 754   | 79.5%             | 8.7              | 6563           | 1142                                      |
|                                           | General        | 1511                | 771     | 139  | 12   | 922   | 61.0%             | 9.2              | 8479           |                                           |
| Pooled Total                              |                | 2661                | 815     | 1093 | 136  | 2044  | 76.8%             | 8.4              | 17244          |                                           |
| Pooled Resident                           |                | 1814                | 613     | 705  | 80   | 1398  | 77.1%             | 9.7              | 13536          |                                           |
| Pooled Nonresident                        |                | 847                 | 202     | 388  | 56   | 646   | 76.3%             | 5.7              | 3708           |                                           |

TABLE II-A (Continued)

## WHITE-TAILED DEER HUNT AREA REPORT

| AREA<br>(cross hunt areas) | TYPE           | ACTIVE<br>LICS/HTRS | HARVEST |     |      |       | HUNTER<br>SUCCESS | DAYS/<br>HARVEST | HUNTER<br>DAYS | LICENSES<br>SOLD<br>(cross hunt<br>incl.) |
|----------------------------|----------------|---------------------|---------|-----|------|-------|-------------------|------------------|----------------|-------------------------------------------|
|                            |                |                     | BUCK    | DOE | FAWN | TOTAL |                   |                  |                |                                           |
| 25 Tongue-Goose            |                |                     |         |     |      |       |                   |                  |                |                                           |
|                            | General        | 131                 | 37      | 0   | 0    | 37    | 28.2%             | 8.1              | 299            |                                           |
| Pooled Total               |                | 131                 | 37      | 0   | 0    | 37    | 28.2%             | 8.1              | 299            |                                           |
| Pooled Resident            |                | 109                 | 23      | 0   | 0    | 23    | 21.1%             | 9.8              | 225            |                                           |
| Pooled Nonresident         |                | 22                  | 14      | 0   | 0    | 14    | 63.6%             | 5.3              | 74             |                                           |
| 26 Ucross                  |                |                     |         |     |      |       |                   |                  |                |                                           |
| (23)                       | Limited Type 3 | 9                   | 9       | 0   | 0    | 9     | 100.0%            | 3.4              | 31             | 43                                        |
| (23)                       | D/F Type 6     | 90                  | 0       | 57  | 9    | 66    | 73.3%             | 7.3              | 479            | 783                                       |
| (23)                       | D/F Type 7     | 83                  | 0       | 63  | 5    | 68    | 81.9%             | 5.9              | 399            | 240                                       |
|                            | General        | 403                 | 190     | 24  | 0    | 214   | 53.1%             | 8.3              | 1780           |                                           |
| Pooled Total               |                | 510                 | 199     | 144 | 14   | 357   | 70.0%             | 7.5              | 2689           |                                           |
| Pooled Resident            |                | 429                 | 161     | 132 | 14   | 307   | 71.6%             | 8.1              | 2481           |                                           |
| Pooled Nonresident         |                | 81                  | 38      | 12  | 0    | 50    | 61.7%             | 4.2              | 208            |                                           |
| 27 Buffalo                 |                |                     |         |     |      |       |                   |                  |                |                                           |
| (24)                       | Limited Type 3 | 40                  | 26      | 0   | 0    | 26    | 65.0%             | 6.3              | 163            | 102                                       |
|                            | D/F Type 6     | 116                 | 0       | 63  | 8    | 71    | 61.2%             | 7.8              | 557            | 200                                       |
|                            | D/F Type 7     | 440                 | 0       | 279 | 73   | 352   | 80.0%             | 11.1             | 3924           | 519                                       |
|                            | General        | 743                 | 345     | 66  | 29   | 440   | 59.2%             | 7.3              | 3193           |                                           |
| Pooled Total               |                | 1182                | 371     | 408 | 110  | 889   | 75.2%             | 8.8              | 7837           |                                           |
| Pooled Resident            |                | 857                 | 261     | 329 | 60   | 650   | 75.8%             | 10.4             | 6756           |                                           |
| Pooled Nonresident         |                | 325                 | 110     | 79  | 50   | 239   | 73.5%             | 4.5              | 1081           |                                           |
| 28 Hunter Mesa             |                |                     |         |     |      |       |                   |                  |                |                                           |
|                            | General        | 201                 | 59      | 0   | 0    | 59    | 29.4%             | 9.7              | 575            |                                           |
| Pooled Total               |                | 201                 | 59      | 0   | 0    | 59    | 29.4%             | 9.7              | 575            |                                           |
| Pooled Resident            |                | 133                 | 45      | 0   | 0    | 45    | 33.8%             | 9.9              | 446            |                                           |
| Pooled Nonresident         |                | 68                  | 14      | 0   | 0    | 14    | 20.6%             | 9.2              | 129            |                                           |
| 29 Johnson                 |                |                     |         |     |      |       |                   |                  |                |                                           |
|                            | D/F Type 6     | 130                 | 0       | 57  | 9    | 66    | 50.8%             | 5.2              | 343            | 259                                       |
|                            | D/F Type 7     | 30                  | 0       | 25  | 0    | 25    | 83.3%             | 2.2              | 54             | 30                                        |
|                            | General        | 213                 | 73      | 21  | 0    | 94    | 44.1%             | 5.1              | 475            |                                           |
| Pooled Total               |                | 310                 | 73      | 103 | 9    | 185   | 59.7%             | 4.7              | 872            |                                           |
| Pooled Resident            |                | 195                 | 51      | 61  | 5    | 117   | 60.0%             | 5.4              | 628            |                                           |
| Pooled Nonresident         |                | 115                 | 22      | 42  | 4    | 68    | 59.1%             | 3.6              | 244            |                                           |
| 30 Upper Powder River      |                |                     |         |     |      |       |                   |                  |                |                                           |
|                            | D/F Type 6     | 149                 | 0       | 80  | 8    | 88    | 59.1%             | 3.5              | 304            | 219                                       |
|                            | General        | 263                 | 91      | 20  | 9    | 120   | 45.6%             | 7.7              | 921            |                                           |
| Pooled Total               |                | 335                 | 91      | 100 | 17   | 208   | 62.1%             | 5.9              | 1225           |                                           |
| Pooled Resident            |                | 180                 | 66      | 60  | 9    | 135   | 75.0%             | 5.5              | 740            |                                           |
| Pooled Nonresident         |                | 155                 | 25      | 40  | 8    | 73    | 47.1%             | 6.6              | 485            |                                           |
| 31 Salt Creek              |                |                     |         |     |      |       |                   |                  |                |                                           |
|                            | General        | 0                   | 0       | 0   | 0    | 0     | 0.0%              | 0.0              | 0              |                                           |
| Pooled Total               |                | 0                   | 0       | 0   | 0    | 0     | 0.0%              | 0.0              | 0              |                                           |
| Pooled Resident            |                | 0                   | 0       | 0   | 0    | 0     | 0.0%              | 0.0              | 0              |                                           |
| Pooled Nonresident         |                | 0                   | 0       | 0   | 0    | 0     | 0.0%              | 0.0              | 0              |                                           |
| 32 Beartrap Creek          |                |                     |         |     |      |       |                   |                  |                |                                           |
| (33)                       | D/F Type 7     | 5                   | 0       | 5   | 0    | 5     | 100.0%            | 27.2             | 136            | 42                                        |
|                            | General        | 16                  | 4       | 4   | 0    | 8     | 50.0%             | 5.9              | 47             |                                           |
| Pooled Total               |                | 21                  | 4       | 9   | 0    | 13    | 61.9%             | 14.1             | 183            |                                           |
| Pooled Resident            |                | 15                  | 4       | 7   | 0    | 11    | 73.3%             | 15.5             | 170            |                                           |
| Pooled Nonresident         |                | 6                   | 0       | 2   | 0    | 2     | 33.3%             | 6.5              | 13             |                                           |

TABLE II-A (Continued)

## WHITE-TAILED DEER HUNT AREA REPORT

| AREA<br>(cross hunt areas) | TYPE           | ACTIVE<br>LICS/HTRS | HARVEST |     |      |       | HUNTER<br>SUCCESS | DAYS/<br>HARVEST | HUNTER<br>DAYS | LICENSES<br>SOLD<br>(cross hunt<br>incl.) |
|----------------------------|----------------|---------------------|---------|-----|------|-------|-------------------|------------------|----------------|-------------------------------------------|
|                            |                |                     | BUCK    | DOE | FAWN | TOTAL |                   |                  |                |                                           |
| 33 Red Fork                |                |                     |         |     |      |       |                   |                  |                |                                           |
|                            | D/F Type 6     | 45                  | 0       | 7   | 10   | 17    | 37.8%             | 17.2             | 293            | 199                                       |
| (32)                       | D/F Type 7     | 26                  | 0       | 20  | 3    | 23    | 88.5%             | 2.8              | 64             | 42                                        |
|                            | General        | 286                 | 64      | 21  | 9    | 94    | 32.9%             | 7.3              | 690            |                                           |
| Pooled Total               |                | 317                 | 64      | 48  | 22   | 134   | 42.3%             | 7.8              | 1047           |                                           |
| Pooled Resident            |                | 162                 | 39      | 23  | 20   | 82    | 50.6%             | 7.2              | 594            |                                           |
| Pooled Nonresident         |                | 155                 | 25      | 25  | 2    | 52    | 33.5%             | 8.7              | 453            |                                           |
| 34 Natrona                 |                |                     |         |     |      |       |                   |                  |                |                                           |
|                            | Limited Type 1 | 30                  | 13      | 0   | 0    | 13    | 43.3%             | 12.4             | 161            | 351                                       |
|                            | D/F Type 6     | 18                  | 0       | 0   | 4    | 4     | 22.2%             | 5.8              | 23             | 151                                       |
| Pooled Total               |                | 40                  | 13      | 0   | 4    | 17    | 42.5%             | 10.8             | 184            |                                           |
| Pooled Resident            |                | 33                  | 13      | 0   | 4    | 17    | 51.5%             | 10.1             | 172            |                                           |
| Pooled Nonresident         |                | 7                   | 0       | 0   | 0    | 0     | 0.0%              | 0.0              | 12             |                                           |
| 35 Upper Nowood            |                |                     |         |     |      |       |                   |                  |                |                                           |
|                            | General        | 26                  | 0       | 0   | 0    | 0     | 0.0%              | 0.0              | 99             |                                           |
| Pooled Total               |                | 26                  | 0       | 0   | 0    | 0     | 0.0%              | 0.0              | 99             |                                           |
| Pooled Resident            |                | 22                  | 0       | 0   | 0    | 0     | 0.0%              | 0.0              | 95             |                                           |
| Pooled Nonresident         |                | 4                   | 0       | 0   | 0    | 0     | 0.0%              | 0.0              | 4              |                                           |
| 36 Badwater                |                |                     |         |     |      |       |                   |                  |                |                                           |
|                            | D/F Type 7     | 10                  | 0       | 0   | 0    | 0     | 0.0%              | 0.0              | 27             | 12                                        |
|                            | General        | 55                  | 0       | 0   | 0    | 0     | 0.0%              | 0.0              | 101            |                                           |
| Pooled Total               |                | 59                  | 0       | 0   | 0    | 0     | 0.0%              | 0.0              | 128            |                                           |
| Pooled Resident            |                | 46                  | 0       | 0   | 0    | 0     | 0.0%              | 0.0              | 110            |                                           |
| Pooled Nonresident         |                | 13                  | 0       | 0   | 0    | 0     | 0.0%              | 0.0              | 18             |                                           |
| 37 Copper Mountain         |                |                     |         |     |      |       |                   |                  |                |                                           |
|                            | Limited Type 1 | 30                  | 6       | 0   | 0    | 6     | 20.0%             | 30.7             | 184            | 179                                       |
| (127)                      | Limited Type 2 | 17                  | 13      | 0   | 0    | 13    | 76.5%             | 10.8             | 141            | 25                                        |
|                            | D/F Type 6     | 31                  | 0       | 6   | 6    | 12    | 38.7%             | 9.7              | 116            | 148                                       |
| (127)                      | D/F Type 7     | 14                  | 0       | 7   | 2    | 9     | 64.3%             | 4.3              | 39             | 35                                        |
| Pooled Total               |                | 66                  | 19      | 13  | 8    | 40    | 60.6%             | 12.0             | 480            |                                           |
| Pooled Resident            |                | 65                  | 18      | 13  | 8    | 39    | 60.0%             | 12.2             | 475            |                                           |
| Pooled Nonresident         |                | 1                   | 1       | 0   | 0    | 1     | 100.0%            | 5.0              | 5              |                                           |
| 38 Black Mountain          |                |                     |         |     |      |       |                   |                  |                |                                           |
|                            | General        | 6                   | 0       | 0   | 0    | 0     | 0.0%              | 0.0              | 18             |                                           |
| Pooled Total               |                | 6                   | 0       | 0   | 0    | 0     | 0.0%              | 0.0              | 18             |                                           |
| Pooled Resident            |                | 6                   | 0       | 0   | 0    | 0     | 0.0%              | 0.0              | 18             |                                           |
| Pooled Nonresident         |                | 0                   | 0       | 0   | 0    | 0     | 0.0%              | 0.0              | 0              |                                           |
| 39 Bates Creek             |                |                     |         |     |      |       |                   |                  |                |                                           |
|                            | D/F Type 6     | 12                  | 0       | 0   | 0    | 0     | 0.0%              | 0.0              | 19             | 50                                        |
|                            | General        | 16                  | 2       | 0   | 0    | 2     | 12.5%             | 8.0              | 16             |                                           |
| Pooled Total               |                | 24                  | 2       | 0   | 0    | 2     | 8.3%              | 17.5             | 35             |                                           |
| Pooled Resident            |                | 5                   | 2       | 0   | 0    | 2     | 40.0%             | 2.5              | 5              |                                           |
| Pooled Nonresident         |                | 19                  | 0       | 0   | 0    | 0     | 0.0%              | 0.0              | 30             |                                           |
| 40 Buffalo Creek           |                |                     |         |     |      |       |                   |                  |                |                                           |
|                            | D/F Type 6     | 16                  | 0       | 11  | 0    | 11    | 68.8%             | 3.0              | 33             | 121                                       |
|                            | General        | 64                  | 8       | 8   | 0    | 16    | 25.0%             | 6.2              | 99             |                                           |
| Pooled Total               |                | 80                  | 8       | 19  | 0    | 27    | 33.8%             | 4.9              | 132            |                                           |
| Pooled Resident            |                | 28                  | 4       | 7   | 0    | 11    | 39.3%             | 5.2              | 57             |                                           |
| Pooled Nonresident         |                | 52                  | 4       | 12  | 0    | 16    | 30.8%             | 4.7              | 75             |                                           |
| 41 Sand Creek              |                |                     |         |     |      |       |                   |                  |                |                                           |
| (44, 45)                   | Limited Type 1 | 47                  | 27      | 2   | 0    | 29    | 61.7%             | 11.8             | 343            | 54                                        |
| (45)                       | D/F Type 6     | 68                  | 0       | 19  | 10   | 29    | 42.6%             | 5.8              | 168            | 197                                       |
| (45)                       | D/F Type 7     | 18                  | 0       | 0   | 12   | 12    | 66.7%             | 9.0              | 108            | 29                                        |
|                            | General        | 120                 | 25      | 0   | 0    | 25    | 20.8%             | 12.2             | 305            |                                           |
| Pooled Total               |                | 203                 | 52      | 21  | 22   | 95    | 46.8%             | 9.7              | 924            |                                           |
| Pooled Resident            |                | 154                 | 45      | 14  | 17   | 76    | 49.4%             | 10.2             | 776            |                                           |
| Pooled Nonresident         |                | 49                  | 7       | 7   | 5    | 19    | 38.8%             | 7.8              | 148            |                                           |

TABLE II-A (Continued)

## WHITE-TAILED DEER HUNT AREA REPORT

| AREA<br>(cross hunt areas)  | TYPE               | ACTIVE<br>LICS/HTRS | HARVEST |     |      |       | HUNTER<br>SUCCESS | DAYS/<br>HARVEST | HUNTER<br>DAYS | LICENSES<br>SOLD<br>(cross hunt<br>incl.) |
|-----------------------------|--------------------|---------------------|---------|-----|------|-------|-------------------|------------------|----------------|-------------------------------------------|
|                             |                    |                     | BUCK    | DOE | FAWN | TOTAL |                   |                  |                |                                           |
| 42 Otter Creek              |                    |                     |         |     |      |       |                   |                  |                |                                           |
|                             | D/F Type 6         | 28                  | 0       | 15  | 5    | 20    | 71.4%             | 6.6              | 131            | 175                                       |
|                             | General            | 224                 | 18      | 8   | 0    | 26    | 11.6%             | 21.2             | 552            |                                           |
|                             | Pooled Total       | 238                 | 18      | 23  | 5    | 46    | 19.3%             | 14.8             | 683            |                                           |
|                             | Pooled Resident    | 104                 | 4       | 14  | 0    | 18    | 17.3%             | 25.7             | 463            |                                           |
|                             | Pooled Nonresident | 134                 | 14      | 9   | 5    | 28    | 20.9%             | 7.9              | 220            |                                           |
| 43 Leigh Creek              |                    |                     |         |     |      |       |                   |                  |                |                                           |
|                             | General            | 22                  | 7       | 0   | 0    | 7     | 31.8%             | 6.6              | 46             |                                           |
|                             | Pooled Total       | 22                  | 7       | 0   | 0    | 7     | 31.8%             | 6.6              | 46             |                                           |
|                             | Pooled Resident    | 8                   | 0       | 0   | 0    | 0     | 0.0%              | 0.0              | 17             |                                           |
|                             | Pooled Nonresident | 14                  | 7       | 0   | 0    | 7     | 50.0%             | 4.1              | 29             |                                           |
| 44 Brokenback Creek         |                    |                     |         |     |      |       |                   |                  |                |                                           |
| (41, 45)                    | Limited Type 1     | 6                   | 2       | 0   | 0    | 2     | 33.3%             | 9.5              | 19             | 54                                        |
|                             | General            | 29                  | 4       | 0   | 0    | 4     | 13.8%             | 15.3             | 61             |                                           |
|                             | Pooled Total       | 35                  | 6       | 0   | 0    | 6     | 17.1%             | 13.3             | 80             |                                           |
|                             | Pooled Resident    | 32                  | 6       | 0   | 0    | 6     | 18.8%             | 12.2             | 73             |                                           |
|                             | Pooled Nonresident | 3                   | 0       | 0   | 0    | 0     | 0.0%              | 0.0              | 7              |                                           |
| 45 Paint Rock Creek         |                    |                     |         |     |      |       |                   |                  |                |                                           |
| (41, 44)                    | Limited Type 1     | 6                   | 6       | 0   | 0    | 6     | 100.0%            | 1.8              | 11             | 54                                        |
| (41)                        | D/F Type 6         | 12                  | 0       | 5   | 2    | 7     | 58.3%             | 4.1              | 29             | 197                                       |
| (41)                        | D/F Type 7         | 0                   | 0       | 0   | 0    | 0     | 0.0%              | 0.0              | 0              | 29                                        |
|                             | General            | 48                  | 14      | 0   | 0    | 14    | 29.2%             | 20.3             | 284            |                                           |
|                             | Pooled Total       | 64                  | 20      | 5   | 2    | 27    | 42.2%             | 12.0             | 324            |                                           |
|                             | Pooled Resident    | 42                  | 17      | 0   | 2    | 19    | 45.2%             | 15.2             | 288            |                                           |
|                             | Pooled Nonresident | 22                  | 3       | 5   | 0    | 8     | 36.4%             | 4.5              | 36             |                                           |
| 46 Cloud Peak               |                    |                     |         |     |      |       |                   |                  |                |                                           |
|                             | General            | 37                  | 0       | 0   | 0    | 0     | 0.0%              | 0.0              | 61             |                                           |
|                             | Pooled Total       | 37                  | 0       | 0   | 0    | 0     | 0.0%              | 0.0              | 61             |                                           |
|                             | Pooled Resident    | 34                  | 0       | 0   | 0    | 0     | 0.0%              | 0.0              | 56             |                                           |
|                             | Pooled Nonresident | 3                   | 0       | 0   | 0    | 0     | 0.0%              | 0.0              | 5              |                                           |
| 47 Manderson                |                    |                     |         |     |      |       |                   |                  |                |                                           |
| (also valid 51)             | Limited Type 1     | 7                   | 1       | 1   | 0    | 2     | 28.6%             | 43.5             | 87             |                                           |
| (49)                        | D/F Type 6         | 15                  | 0       | 5   | 0    | 5     | 33.3%             | 4.6              | 23             | 149                                       |
|                             | General            | 95                  | 16      | 0   | 0    | 16    | 16.8%             | 16.4             | 262            |                                           |
|                             | Pooled Total       | 106                 | 17      | 6   | 0    | 23    | 21.7%             | 16.2             | 372            |                                           |
|                             | Pooled Resident    | 71                  | 16      | 3   | 0    | 19    | 26.8%             | 14.8             | 281            |                                           |
|                             | Pooled Nonresident | 35                  | 1       | 3   | 0    | 4     | 11.4%             | 22.8             | 91             |                                           |
| 49 Trapper Creek            |                    |                     |         |     |      |       |                   |                  |                |                                           |
| (also valid 51)             | Limited Type 1     | 1                   | 0       | 0   | 0    | 0     | 0.0%              | 0.0              | 6              |                                           |
| (47)                        | D/F Type 6         | 11                  | 0       | 6   | 0    | 6     | 54.5%             | 1.8              | 11             | 149                                       |
|                             | General            | 18                  | 0       | 0   | 0    | 0     | 0.0%              | 0.0              | 37             |                                           |
|                             | Pooled Total       | 26                  | 0       | 6   | 0    | 6     | 23.1%             | 9.0              | 54             |                                           |
|                             | Pooled Resident    | 21                  | 0       | 6   | 0    | 6     | 28.6%             | 7.2              | 43             |                                           |
|                             | Pooled Nonresident | 5                   | 0       | 0   | 0    | 0     | 0.0%              | 0.0              | 11             |                                           |
| 50 Upper Shell-Beaver Creek |                    |                     |         |     |      |       |                   |                  |                |                                           |
|                             | General            | 26                  | 7       | 0   | 0    | 7     | 26.9%             | 6.1              | 43             |                                           |
|                             | Pooled Total       | 26                  | 7       | 0   | 0    | 7     | 26.9%             | 6.1              | 43             |                                           |
|                             | Pooled Resident    | 19                  | 4       | 0   | 0    | 4     | 21.1%             | 8.3              | 33             |                                           |
|                             | Pooled Nonresident | 7                   | 3       | 0   | 0    | 3     | 42.9%             | 3.3              | 10             |                                           |
| 51 Beaver Creek             |                    |                     |         |     |      |       |                   |                  |                |                                           |
|                             | Limited Type 1     | 48                  | 30      | 0   | 0    | 30    | 62.5%             | 10.1             | 302            | 75                                        |
|                             | D/F Type 6         | 57                  | 0       | 19  | 0    | 19    | 33.3%             | 6.2              | 118            | 260                                       |
|                             | General            | 92                  | 10      | 3   | 0    | 13    | 14.1%             | 15.8             | 205            |                                           |
|                             | Pooled Total       | 182                 | 40      | 22  | 0    | 62    | 34.1%             | 10.1             | 625            |                                           |
|                             | Pooled Resident    | 118                 | 21      | 19  | 0    | 40    | 33.9%             | 11.3             | 452            |                                           |
|                             | Pooled Nonresident | 64                  | 19      | 3   | 0    | 22    | 34.4%             | 7.9              | 173            |                                           |



TABLE II-A (Continued)

## WHITE-TAILED DEER HUNT AREA REPORT

| AREA<br>(cross hunt areas)  | TYPE           | ACTIVE<br>LICS/HTRS | HARVEST |     |      |       | HUNTER<br>SUCCESS | DAYS/<br>HARVEST | HUNTER<br>DAYS | LICENSES<br>SOLD<br>(cross hunt<br>incl.) |
|-----------------------------|----------------|---------------------|---------|-----|------|-------|-------------------|------------------|----------------|-------------------------------------------|
|                             |                |                     | BUCK    | DOE | FAWN | TOTAL |                   |                  |                |                                           |
| 52 Crystal Creek            |                |                     |         |     |      |       |                   |                  |                |                                           |
|                             | General        | 27                  | 2       | 0   | 0    | 2     | 7.4%              | 18.5             | 37             |                                           |
| Pooled Total                |                | 27                  | 2       | 0   | 0    | 2     | 7.4%              | 18.5             | 37             |                                           |
| Pooled Resident             |                | 24                  | 2       | 0   | 0    | 2     | 8.3%              | 17.0             | 34             |                                           |
| Pooled Nonresident          |                | 3                   | 0       | 0   | 0    | 0     | 0.0%              | 0.0              | 3              |                                           |
| 53 Devils Canyon            |                |                     |         |     |      |       |                   |                  |                |                                           |
|                             | General        | 23                  | 4       | 0   | 0    | 4     | 17.4%             | 8.3              | 33             |                                           |
| Pooled Total                |                | 23                  | 4       | 0   | 0    | 4     | 17.4%             | 8.3              | 33             |                                           |
| Pooled Resident             |                | 20                  | 4       | 0   | 0    | 4     | 20.0%             | 6.5              | 26             |                                           |
| Pooled Nonresident          |                | 3                   | 0       | 0   | 0    | 0     | 0.0%              | 0.0              | 7              |                                           |
| 55 Rock Eagle               |                |                     |         |     |      |       |                   |                  |                |                                           |
| (16)                        | Limited Type 1 | 79                  | 54      | 4   | 2    | 60    | 75.9%             | 8.9              | 536            | 125                                       |
|                             | D/F Type 6     | 50                  | 0       | 13  | 2    | 15    | 30.0%             | 12.0             | 180            | 150                                       |
|                             | General        | 137                 | 0       | 0   | 0    | 0     | 0.0%              | 0.0              | 320            |                                           |
| Pooled Total                |                | 244                 | 54      | 17  | 4    | 75    | 30.7%             | 13.8             | 1036           |                                           |
| Pooled Resident             |                | 196                 | 42      | 10  | 4    | 56    | 28.6%             | 15.9             | 892            |                                           |
| Pooled Nonresident          |                | 48                  | 12      | 7   | 0    | 19    | 39.6%             | 7.6              | 144            |                                           |
| 57 Southeast                |                |                     |         |     |      |       |                   |                  |                |                                           |
|                             | Limited Type 1 | 33                  | 20      | 2   | 0    | 22    | 66.7%             | 10.1             | 223            | 50                                        |
|                             | General        | 145                 | 25      | 4   | 3    | 32    | 22.1%             | 13.9             | 445            |                                           |
| Pooled Total                |                | 178                 | 45      | 6   | 3    | 54    | 30.3%             | 12.4             | 668            |                                           |
| Pooled Resident             |                | 156                 | 36      | 4   | 3    | 43    | 27.6%             | 13.9             | 598            |                                           |
| Pooled Nonresident          |                | 22                  | 9       | 2   | 0    | 11    | 50.0%             | 6.4              | 70             |                                           |
| 59 Little Bear              |                |                     |         |     |      |       |                   |                  |                |                                           |
| (62, 63, 64)                | Limited Type 1 | 31                  | 20      | 2   | 0    | 22    | 71.0%             | 8.5              | 187            | 126                                       |
|                             | D/F Type 6     | 11                  | 0       | 8   | 0    | 8     | 72.7%             | 2.6              | 21             | 51                                        |
|                             | General        | 29                  | 0       | 0   | 0    | 0     | 0.0%              | 0.0              | 85             |                                           |
| Pooled Total                |                | 67                  | 20      | 10  | 0    | 30    | 44.8%             | 9.8              | 293            |                                           |
| Pooled Resident             |                | 50                  | 14      | 8   | 0    | 22    | 44.0%             | 11.1             | 244            |                                           |
| Pooled Nonresident          |                | 17                  | 6       | 2   | 0    | 8     | 47.1%             | 6.1              | 49             |                                           |
| 60 Pole Mountain            |                |                     |         |     |      |       |                   |                  |                |                                           |
| (also valid 59, 62, 63, 64) | Limited Type 1 | 23                  | 8       | 0   | 0    | 8     | 34.8%             | 5.1              | 41             | 105                                       |
|                             | Limited Type 2 | 20                  | 6       | 0   | 0    | 6     | 30.0%             | 7.2              | 43             | 157                                       |
|                             | D/F Type 6     | 22                  | 0       | 11  | 0    | 11    | 50.0%             | 8.1              | 89             | 50                                        |
| Pooled Total                |                | 53                  | 14      | 11  | 0    | 25    | 47.2%             | 6.9              | 173            |                                           |
| Pooled Resident             |                | 45                  | 12      | 7   | 0    | 19    | 42.2%             | 7.2              | 137            |                                           |
| Pooled Nonresident          |                | 8                   | 2       | 4   | 0    | 6     | 75.0%             | 6.0              | 36             |                                           |
| 61 Harriman                 |                |                     |         |     |      |       |                   |                  |                |                                           |
|                             | General        | 17                  | 0       | 0   | 0    | 0     | 0.0%              | 0.0              | 45             |                                           |
| Pooled Total                |                | 17                  | 0       | 0   | 0    | 0     | 0.0%              | 0.0              | 45             |                                           |
| Pooled Resident             |                | 17                  | 0       | 0   | 0    | 0     | 0.0%              | 0.0              | 45             |                                           |
| Pooled Nonresident          |                | 0                   | 0       | 0   | 0    | 0     | 0.0%              | 0.0              | 0              |                                           |
| 62 Iron Mountain            |                |                     |         |     |      |       |                   |                  |                |                                           |
| (59, 63, 64)                | Limited Type 1 | 6                   | 2       | 2   | 2    | 6     | 100.0%            | 1.3              | 8              | 126                                       |
| (63, 64)                    | D/F Type 6     | 6                   | 0       | 0   | 0    | 0     | 0.0%              | 0.0              | 17             | 177                                       |
|                             | General        | 22                  | 3       | 0   | 0    | 3     | 13.6%             | 10.3             | 31             |                                           |
| Pooled Total                |                | 34                  | 5       | 2   | 2    | 9     | 26.5%             | 6.2              | 56             |                                           |
| Pooled Resident             |                | 27                  | 2       | 2   | 2    | 6     | 22.2%             | 6.5              | 39             |                                           |
| Pooled Nonresident          |                | 7                   | 3       | 0   | 0    | 3     | 42.9%             | 5.7              | 17             |                                           |
| 63 Richeau                  |                |                     |         |     |      |       |                   |                  |                |                                           |
| (59, 62, 64)                | Limited Type 1 | 6                   | 2       | 0   | 0    | 2     | 33.3%             | 21.0             | 42             | 126                                       |
| (62, 64)                    | D/F Type 6     | 9                   | 0       | 4   | 0    | 4     | 44.4%             | 3.8              | 15             | 177                                       |
|                             | General        | 29                  | 7       | 0   | 0    | 7     | 24.1%             | 5.4              | 38             |                                           |
| Pooled Total                |                | 40                  | 9       | 4   | 0    | 13    | 32.5%             | 7.3              | 95             |                                           |
| Pooled Resident             |                | 31                  | 6       | 4   | 0    | 10    | 32.3%             | 7.9              | 79             |                                           |
| Pooled Nonresident          |                | 9                   | 3       | 0   | 0    | 3     | 33.3%             | 5.3              | 16             |                                           |

TABLE II-A (Continued)

## WHITE-TAILED DEER HUNT AREA REPORT

|                            |                    |                     |         |     |      |       |                   |                  |                | LICENSES                      |
|----------------------------|--------------------|---------------------|---------|-----|------|-------|-------------------|------------------|----------------|-------------------------------|
| AREA<br>(cross hunt areas) | TYPE               | ACTIVE<br>LICS/HTRS | HARVEST |     |      |       | HUNTER<br>SUCCESS | DAYS/<br>HARVEST | HUNTER<br>DAYS | SOLD<br>(cross hunt<br>incl.) |
|                            |                    |                     | BUCK    | DOE | FAWN | TOTAL |                   |                  |                |                               |
|                            |                    |                     |         |     |      |       |                   |                  |                |                               |
| 64 Laramie Peak            |                    |                     |         |     |      |       |                   |                  |                |                               |
| (59, 62, 63)               | Limited Type 1     | 60                  | 46      | 0   | 2    | 48    | 80.0%             | 7.0              | 336            | 126                           |
|                            | Limited Type 2     | 13                  | 9       | 0   | 0    | 9     | 69.2%             | 5.0              | 45             | 149                           |
| (62, 63)                   | D/F Type 6         | 37                  | 0       | 15  | 2    | 17    | 45.9%             | 5.8              | 99             | 177                           |
|                            | General            | 216                 | 44      | 0   | 0    | 44    | 20.4%             | 12.5             | 551            |                               |
|                            | Pooled Total       | 306                 | 99      | 15  | 4    | 118   | 38.6%             | 8.7              | 1031           |                               |
|                            | Pooled Resident    | 234                 | 68      | 10  | 4    | 82    | 35.0%             | 10.1             | 826            |                               |
|                            | Pooled Nonresident | 72                  | 31      | 5   | 0    | 36    | 50.0%             | 5.7              | 205            |                               |
|                            |                    |                     |         |     |      |       |                   |                  |                |                               |
| 65 South Converse          |                    |                     |         |     |      |       |                   |                  |                |                               |
| (66, 88)                   | Limited Type 1     | 214                 | 133     | 10  | 0    | 143   | 66.8%             | 6.3              | 896            | 400                           |
|                            | D/F Type 6         | 70                  | 0       | 12  | 6    | 18    | 25.7%             | 6.4              | 116            | 196                           |
| (66, 88)                   | D/F Type 7         | 157                 | 0       | 97  | 48   | 145   | 92.4%             | 3.8              | 545            | 389                           |
|                            | General            | 287                 | 52      | 0   | 0    | 52    | 18.1%             | 11.1             | 577            |                               |
|                            | Pooled Total       | 623                 | 185     | 119 | 54   | 358   | 57.5%             | 6.0              | 2134           |                               |
|                            | Pooled Resident    | 394                 | 143     | 74  | 35   | 252   | 64.0%             | 6.0              | 1503           |                               |
|                            | Pooled Nonresident | 229                 | 42      | 45  | 19   | 106   | 46.3%             | 6.0              | 631            |                               |
|                            |                    |                     |         |     |      |       |                   |                  |                |                               |
| 66 Bates Hole-Hat Six      |                    |                     |         |     |      |       |                   |                  |                |                               |
| (65, 88)                   | Limited Type 1     | 75                  | 46      | 8   | 0    | 54    | 72.0%             | 8.6              | 465            | 400                           |
|                            | D/F Type 6         | 6                   | 0       | 0   | 0    | 0     | 0.0%              | 0.0              | 8              | 200                           |
| (65, 88)                   | D/F Type 7         | 108                 | 0       | 62  | 20   | 82    | 75.9%             | 5.6              | 461            | 389                           |
|                            | General            | 155                 | 30      | 0   | 0    | 30    | 19.4%             | 12.7             | 380            |                               |
|                            | Pooled Total       | 302                 | 76      | 70  | 20   | 166   | 55.0%             | 7.9              | 1314           |                               |
|                            | Pooled Resident    | 263                 | 68      | 61  | 13   | 142   | 54.0%             | 8.6              | 1227           |                               |
|                            | Pooled Nonresident | 39                  | 8       | 9   | 7    | 24    | 61.5%             | 3.6              | 87             |                               |
|                            |                    |                     |         |     |      |       |                   |                  |                |                               |
| 70 Shirley Mountain        |                    |                     |         |     |      |       |                   |                  |                |                               |
|                            | Limited Type 1     | 7                   | 4       | 0   | 0    | 4     | 57.1%             | 13.5             | 54             | 11                            |
|                            | D/F Type 6         | 17                  | 0       | 6   | 2    | 8     | 47.1%             | 3.6              | 29             | 100                           |
|                            | General            | 64                  | 0       | 0   | 0    | 0     | 0.0%              | 0.0              | 97             |                               |
|                            | Pooled Total       | 80                  | 4       | 6   | 2    | 12    | 15.0%             | 15.0             | 180            |                               |
|                            | Pooled Resident    | 45                  | 4       | 4   | 0    | 8     | 17.8%             | 12.3             | 98             |                               |
|                            | Pooled Nonresident | 35                  | 0       | 2   | 2    | 4     | 11.4%             | 20.5             | 82             |                               |
|                            |                    |                     |         |     |      |       |                   |                  |                |                               |
| 73 Boswell                 |                    |                     |         |     |      |       |                   |                  |                |                               |
|                            | General            | 23                  | 0       | 0   | 0    | 0     | 0.0%              | 0.0              | 29             |                               |
|                            | Pooled Total       | 23                  | 0       | 0   | 0    | 0     | 0.0%              | 0.0              | 29             |                               |
|                            | Pooled Resident    | 20                  | 0       | 0   | 0    | 0     | 0.0%              | 0.0              | 25             |                               |
|                            | Pooled Nonresident | 3                   | 0       | 0   | 0    | 0     | 0.0%              | 0.0              | 4              |                               |
|                            |                    |                     |         |     |      |       |                   |                  |                |                               |
| 74 Kyle                    |                    |                     |         |     |      |       |                   |                  |                |                               |
| (75)                       | Limited Type 1     | 16                  | 9       | 0   | 0    | 9     | 56.3%             | 11.9             | 107            | 26                            |
| (75)                       | D/F Type 6         | 2                   | 0       | 2   | 0    | 2     | 100.0%            | 2.0              | 4              | 25                            |
|                            | General            | 43                  | 0       | 0   | 0    | 0     | 0.0%              | 0.0              | 96             |                               |
|                            | Pooled Total       | 61                  | 9       | 2   | 0    | 11    | 18.0%             | 18.8             | 207            |                               |
|                            | Pooled Resident    | 44                  | 6       | 2   | 0    | 8     | 18.2%             | 21.9             | 175            |                               |
|                            | Pooled Nonresident | 17                  | 3       | 0   | 0    | 3     | 17.6%             | 10.7             | 32             |                               |
|                            |                    |                     |         |     |      |       |                   |                  |                |                               |
| 75 Four Mile               |                    |                     |         |     |      |       |                   |                  |                |                               |
| (74)                       | Limited Type 1     | 8                   | 3       | 0   | 0    | 3     | 37.5%             | 4.7              | 14             | 26                            |
| (74)                       | D/F Type 6         | 2                   | 0       | 2   | 0    | 2     | 100.0%            | 4.0              | 8              | 25                            |
|                            | General            | 70                  | 0       | 0   | 0    | 0     | 0.0%              | 0.0              | 167            |                               |
|                            | Pooled Total       | 80                  | 3       | 2   | 0    | 5     | 6.3%              | 37.8             | 189            |                               |
|                            | Pooled Resident    | 76                  | 3       | 2   | 0    | 5     | 6.6%              | 37.0             | 185            |                               |
|                            | Pooled Nonresident | 4                   | 0       | 0   | 0    | 0     | 0.0%              | 0.0              | 4              |                               |

TABLE II-A (Continued)

## WHITE-TAILED DEER HUNT AREA REPORT

| LICENSES                   |                |                     |         |     |      |       |                   |                  |                |                            |
|----------------------------|----------------|---------------------|---------|-----|------|-------|-------------------|------------------|----------------|----------------------------|
| AREA<br>(cross hunt areas) | TYPE           | ACTIVE<br>LICS/HTRS | HARVEST |     |      |       | HUNTER<br>SUCCESS | DAYS/<br>HARVEST | HUNTER<br>DAYS | SOLD<br>(cross hunt incl.) |
|                            |                |                     | BUCK    | DOE | FAWN | TOTAL |                   |                  |                |                            |
|                            |                |                     |         |     |      |       |                   |                  |                |                            |
| 76 Sheep Mountain          |                |                     |         |     |      |       |                   |                  |                |                            |
|                            | General        | 83                  | 0       | 0   | 0    | 0     | 0.0%              | 0.0              | 269            |                            |
| Pooled Total               |                | 83                  | 0       | 0   | 0    | 0     | 0.0%              | 0.0              | 269            |                            |
| Pooled Resident            |                | 79                  | 0       | 0   | 0    | 0     | 0.0%              | 0.0              | 265            |                            |
| Pooled Nonresident         |                | 4                   | 0       | 0   | 0    | 0     | 0.0%              | 0.0              | 4              |                            |
|                            |                |                     |         |     |      |       |                   |                  |                |                            |
| 77 Boulder Ridge           |                |                     |         |     |      |       |                   |                  |                |                            |
|                            | General        | 44                  | 0       | 0   | 0    | 0     | 0.0%              | 0.0              | 116            |                            |
| Pooled Total               |                | 44                  | 0       | 0   | 0    | 0     | 0.0%              | 0.0              | 116            |                            |
| Pooled Resident            |                | 37                  | 0       | 0   | 0    | 0     | 0.0%              | 0.0              | 89             |                            |
| Pooled Nonresident         |                | 7                   | 0       | 0   | 0    | 0     | 0.0%              | 0.0              | 27             |                            |
|                            |                |                     |         |     |      |       |                   |                  |                |                            |
| 78 French Creek            |                |                     |         |     |      |       |                   |                  |                |                            |
| (79, 80, 81)               | Limited Type 1 | 5                   | 5       | 0   | 0    | 5     | 100.0%            | 3.4              | 17             | 28                         |
| (79, 80, 81)               | Limited Type 2 | 0                   | 0       | 0   | 0    | 0     | 0.0%              | 0.0              | 0              | 27                         |
| (79, 80, 81)               | D/F Type 6     | 4                   | 0       | 2   | 0    | 2     | 50.0%             | 5.5              | 11             | 203                        |
|                            | General        | 78                  | 0       | 0   | 4    | 4     | 5.1%              | 35.0             | 140            |                            |
| Pooled Total               |                | 87                  | 5       | 2   | 4    | 11    | 12.6%             | 15.3             | 168            |                            |
| Pooled Resident            |                | 61                  | 5       | 2   | 0    | 7     | 11.5%             | 20.1             | 141            |                            |
| Pooled Nonresident         |                | 26                  | 0       | 0   | 4    | 4     | 15.4%             | 6.8              | 27             |                            |
|                            |                |                     |         |     |      |       |                   |                  |                |                            |
| 79 Kennaday Peak           |                |                     |         |     |      |       |                   |                  |                |                            |
| (78, 80, 81)               | Limited Type 1 | 7                   | 5       | 0   | 0    | 5     | 71.4%             | 6.8              | 34             | 28                         |
| (78, 80, 81)               | Limited Type 2 | 0                   | 0       | 0   | 0    | 0     | 0.0%              | 0.0              | 0              | 27                         |
| (78, 80, 81)               | D/F Type 6     | 13                  | 0       | 8   | 0    | 8     | 61.5%             | 3.1              | 25             | 203                        |
|                            | General        | 56                  | 4       | 13  | 0    | 17    | 30.4%             | 12.2             | 208            |                            |
| Pooled Total               |                | 70                  | 9       | 21  | 0    | 30    | 42.9%             | 8.9              | 267            |                            |
| Pooled Resident            |                | 61                  | 5       | 19  | 0    | 24    | 39.3%             | 9.7              | 233            |                            |
| Pooled Nonresident         |                | 9                   | 4       | 2   | 0    | 6     | 66.7%             | 5.7              | 34             |                            |
|                            |                |                     |         |     |      |       |                   |                  |                |                            |
| 80 Spring Creek            |                |                     |         |     |      |       |                   |                  |                |                            |
| (78, 79, 81)               | Limited Type 1 | 0                   | 0       | 0   | 0    | 0     | 0.0%              | 0.0              | 0              | 28                         |
| (78, 79, 81)               | Limited Type 2 | 0                   | 0       | 0   | 0    | 0     | 0.0%              | 0.0              | 0              | 27                         |
| (78, 79, 81)               | D/F Type 6     | 6                   | 0       | 2   | 0    | 2     | 33.3%             | 3.0              | 6              | 203                        |
|                            | General        | 72                  | 0       | 0   | 0    | 0     | 0.0%              | 0.0              | 189            |                            |
| Pooled Total               |                | 76                  | 0       | 2   | 0    | 2     | 2.6%              | 97.5             | 195            |                            |
| Pooled Resident            |                | 54                  | 0       | 2   | 0    | 2     | 3.7%              | 73.5             | 147            |                            |
| Pooled Nonresident         |                | 22                  | 0       | 0   | 0    | 0     | 0.0%              | 0.0              | 48             |                            |
|                            |                |                     |         |     |      |       |                   |                  |                |                            |
| 81 Blackhall               |                |                     |         |     |      |       |                   |                  |                |                            |
| (78, 79, 80)               | Limited Type 1 | 2                   | 2       | 0   | 0    | 2     | 100.0%            | 1.0              | 2              | 28                         |
| (78, 79, 80)               | Limited Type 2 | 0                   | 0       | 0   | 0    | 0     | 0.0%              | 0.0              | 0              | 27                         |
| (78, 79, 80)               | D/F Type 6     | 0                   | 0       | 0   | 0    | 0     | 0.0%              | 0.0              | 0              | 203                        |
|                            | General        | 28                  | 4       | 4   | 0    | 8     | 28.6%             | 7.9              | 63             |                            |
| Pooled Total               |                | 30                  | 6       | 4   | 0    | 10    | 33.3%             | 6.5              | 65             |                            |
| Pooled Resident            |                | 19                  | 6       | 4   | 0    | 10    | 52.6%             | 3.6              | 36             |                            |
| Pooled Nonresident         |                | 11                  | 0       | 0   | 0    | 0     | 0.0%              | 0.0              | 29             |                            |
|                            |                |                     |         |     |      |       |                   |                  |                |                            |
| 82 Baggs                   |                |                     |         |     |      |       |                   |                  |                |                            |
|                            | Limited Type 1 | 3                   | 0       | 0   | 0    | 0     | 0.0%              | 0.0              | 5              | 33                         |
|                            | D/F Type 6     | 11                  | 0       | 0   | 6    | 6     | 54.5%             | 10.8             | 65             | 600                        |
|                            | General        | 119                 | 15      | 0   | 0    | 15    | 12.6%             | 16.5             | 248            |                            |
| Pooled Total               |                | 129                 | 15      | 0   | 6    | 21    | 16.3%             | 15.1             | 318            |                            |
| Pooled Resident            |                | 102                 | 8       | 0   | 0    | 8     | 7.8%              | 24.4             | 195            |                            |
| Pooled Nonresident         |                | 27                  | 7       | 0   | 6    | 13    | 48.1%             | 9.5              | 123            |                            |
|                            |                |                     |         |     |      |       |                   |                  |                |                            |
| 83 Bolten Rim              |                |                     |         |     |      |       |                   |                  |                |                            |
|                            | General        | 5                   | 0       | 0   | 0    | 0     | 0.0%              | 0.0              | 7              |                            |
| Pooled Total               |                | 5                   | 0       | 0   | 0    | 0     | 0.0%              | 0.0              | 7              |                            |
| Pooled Resident            |                | 5                   | 0       | 0   | 0    | 0     | 0.0%              | 0.0              | 7              |                            |
| Pooled Nonresident         |                | 0                   | 0       | 0   | 0    | 0     | 0.0%              | 0.0              | 0              |                            |

TABLE II-A (Continued)

## WHITE-TAILED DEER HUNT AREA REPORT

| AREA<br>(cross hunt areas) | TYPE               | ACTIVE<br>LICS/HTRS | HARVEST |     |      |       | HUNTER<br>SUCCESS | DAYS/<br>HARVEST | HUNTER<br>DAYS | LICENSES<br>SOLD<br>(cross hunt<br>incl.) |
|----------------------------|--------------------|---------------------|---------|-----|------|-------|-------------------|------------------|----------------|-------------------------------------------|
|                            |                    |                     | BUCK    | DOE | FAWN | TOTAL |                   |                  |                |                                           |
| 84 Atlantic Rim            |                    |                     |         |     |      |       |                   |                  |                |                                           |
|                            | Limited Type 1     | 0                   | 0       | 0   | 0    | 0     | 0.0%              | 0.0              | 0              | 150                                       |
|                            | D/F Type 6         | 0                   | 0       | 0   | 0    | 0     | 0.0%              | 0.0              | 0              | 59                                        |
|                            | Pooled Total       | 0                   | 0       | 0   | 0    | 0     | 0.0%              | 0.0              | 0              |                                           |
|                            | Pooled Resident    | 0                   | 0       | 0   | 0    | 0     | 0.0%              | 0.0              | 0              |                                           |
|                            | Pooled Nonresident | 0                   | 0       | 0   | 0    | 0     | 0.0%              | 0.0              | 0              |                                           |
| 87 Ferris                  |                    |                     |         |     |      |       |                   |                  |                |                                           |
|                            | Limited Type 1     | 0                   | 0       | 0   | 0    | 0     | 0.0%              | 0.0              | 0              | 301                                       |
|                            | Pooled Total       | 0                   | 0       | 0   | 0    | 0     | 0.0%              | 0.0              | 0              |                                           |
|                            | Pooled Resident    | 0                   | 0       | 0   | 0    | 0     | 0.0%              | 0.0              | 0              |                                           |
|                            | Pooled Nonresident | 0                   | 0       | 0   | 0    | 0     | 0.0%              | 0.0              | 0              |                                           |
| 88 Kendrick                |                    |                     |         |     |      |       |                   |                  |                |                                           |
| (65, 66)                   | Limited Type 1     | 42                  | 11      | 6   | 0    | 17    | 40.5%             | 7.6              | 130            | 400                                       |
|                            | D/F Type 6         | 62                  | 0       | 22  | 0    | 22    | 35.5%             | 7.0              | 155            | 256                                       |
| (65, 66)                   | D/F Type 7         | 61                  | 0       | 43  | 4    | 47    | 77.0%             | 6.0              | 283            | 389                                       |
|                            | General            | 98                  | 13      | 0   | 0    | 13    | 13.3%             | 15.5             | 202            |                                           |
|                            | Pooled Total       | 228                 | 24      | 71  | 4    | 99    | 43.4%             | 7.8              | 770            |                                           |
|                            | Pooled Resident    | 217                 | 24      | 71  | 4    | 99    | 45.6%             | 7.6              | 753            |                                           |
|                            | Pooled Nonresident | 11                  | 0       | 0   | 0    | 0     | 0.0%              | 0.0              | 17             |                                           |
| 89 Rattlesnake             |                    |                     |         |     |      |       |                   |                  |                |                                           |
|                            | Limited Type 1     | 5                   | 0       | 0   | 0    | 0     | 0.0%              | 0.0              | 5              | 278                                       |
|                            | D/F Type 6         | 7                   | 0       | 0   | 0    | 0     | 0.0%              | 0.0              | 11             | 94                                        |
|                            | Pooled Total       | 12                  | 0       | 0   | 0    | 0     | 0.0%              | 0.0              | 16             |                                           |
|                            | Pooled Resident    | 10                  | 0       | 0   | 0    | 0     | 0.0%              | 0.0              | 12             |                                           |
|                            | Pooled Nonresident | 2                   | 0       | 0   | 0    | 0     | 0.0%              | 0.0              | 4              |                                           |
| 90 Muskrat                 |                    |                     |         |     |      |       |                   |                  |                |                                           |
|                            | Limited Type 1     | 0                   | 0       | 0   | 0    | 0     | 0.0%              | 0.0              | 0              | 75                                        |
|                            | Pooled Total       | 0                   | 0       | 0   | 0    | 0     | 0.0%              | 0.0              | 0              |                                           |
|                            | Pooled Resident    | 0                   | 0       | 0   | 0    | 0     | 0.0%              | 0.0              | 0              |                                           |
|                            | Pooled Nonresident | 0                   | 0       | 0   | 0    | 0     | 0.0%              | 0.0              | 0              |                                           |
| 91 Popo Agie               |                    |                     |         |     |      |       |                   |                  |                |                                           |
|                            | General            | 54                  | 0       | 0   | 0    | 0     | 0.0%              | 0.0              | 69             |                                           |
|                            | Pooled Total       | 54                  | 0       | 0   | 0    | 0     | 0.0%              | 0.0              | 69             |                                           |
|                            | Pooled Resident    | 51                  | 0       | 0   | 0    | 0     | 0.0%              | 0.0              | 66             |                                           |
|                            | Pooled Nonresident | 3                   | 0       | 0   | 0    | 0     | 0.0%              | 0.0              | 3              |                                           |
| 92 Table Mountain          |                    |                     |         |     |      |       |                   |                  |                |                                           |
|                            | D/F Type 6         | 0                   | 0       | 0   | 0    | 0     | 0.0%              | 0.0              | 0              | 50                                        |
|                            | General            | 67                  | 0       | 0   | 0    | 0     | 0.0%              | 0.0              | 126            |                                           |
|                            | Pooled Total       | 67                  | 0       | 0   | 0    | 0     | 0.0%              | 0.0              | 126            |                                           |
|                            | Pooled Resident    | 64                  | 0       | 0   | 0    | 0     | 0.0%              | 0.0              | 119            |                                           |
|                            | Pooled Nonresident | 3                   | 0       | 0   | 0    | 0     | 0.0%              | 0.0              | 7              |                                           |
| 93 Upper Sweetwater        |                    |                     |         |     |      |       |                   |                  |                |                                           |
|                            | General            | 17                  | 0       | 0   | 0    | 0     | 0.0%              | 0.0              | 81             |                                           |
|                            | Pooled Total       | 17                  | 0       | 0   | 0    | 0     | 0.0%              | 0.0              | 81             |                                           |
|                            | Pooled Resident    | 17                  | 0       | 0   | 0    | 0     | 0.0%              | 0.0              | 81             |                                           |
|                            | Pooled Nonresident | 0                   | 0       | 0   | 0    | 0     | 0.0%              | 0.0              | 0              |                                           |
| 94 Twin Creek              |                    |                     |         |     |      |       |                   |                  |                |                                           |
| (160)                      | D/F Type 6         | 6                   | 0       | 2   | 0    | 2     | 33.3%             | 12.0             | 24             | 54                                        |
|                            | General            | 41                  | 0       | 0   | 0    | 0     | 0.0%              | 0.0              | 48             |                                           |
|                            | Pooled Total       | 47                  | 0       | 2   | 0    | 2     | 4.3%              | 36.0             | 72             |                                           |
|                            | Pooled Resident    | 47                  | 0       | 2   | 0    | 2     | 4.3%              | 36.0             | 72             |                                           |
|                            | Pooled Nonresident | 0                   | 0       | 0   | 0    | 0     | 0.0%              | 0.0              | 0              |                                           |
| 95 South Pass              |                    |                     |         |     |      |       |                   |                  |                |                                           |
|                            | General            | 11                  | 0       | 0   | 0    | 0     | 0.0%              | 0.0              | 15             |                                           |
|                            | Pooled Total       | 11                  | 0       | 0   | 0    | 0     | 0.0%              | 0.0              | 15             |                                           |
|                            | Pooled Resident    | 8                   | 0       | 0   | 0    | 0     | 0.0%              | 0.0              | 12             |                                           |
|                            | Pooled Nonresident | 3                   | 0       | 0   | 0    | 0     | 0.0%              | 0.0              | 3              |                                           |

TABLE II-A (Continued)

## WHITE-TAILED DEER HUNT AREA REPORT

| AREA<br>(cross hunt areas) | TYPE               | ACTIVE<br>LICS/HTRS | HARVEST |     |      |       | HUNTER<br>SUCCESS | DAYS/<br>HARVEST | HUNTER<br>DAYS | LICENSES<br>SOLD<br>(cross hunt<br>incl.) |
|----------------------------|--------------------|---------------------|---------|-----|------|-------|-------------------|------------------|----------------|-------------------------------------------|
|                            |                    |                     | BUCK    | DOE | FAWN | TOTAL |                   |                  |                |                                           |
| 96 Green Mountain          |                    |                     |         |     |      |       |                   |                  |                |                                           |
|                            | D/F Type 6         | 11                  | 0       | 2   | 0    | 2     | 18.2%             | 9.5              | 19             | 60                                        |
|                            | General            | 11                  | 0       | 0   | 0    | 0     | 0.0%              | 0.0              | 12             |                                           |
|                            | Pooled Total       | 19                  | 0       | 2   | 0    | 2     | 10.5%             | 15.5             | 31             |                                           |
|                            | Pooled Resident    | 12                  | 0       | 0   | 0    | 0     | 0.0%              | 0.0              | 12             |                                           |
|                            | Pooled Nonresident | 7                   | 0       | 2   | 0    | 2     | 28.6%             | 9.5              | 19             |                                           |
| 97 Sweetwater Rocks        |                    |                     |         |     |      |       |                   |                  |                |                                           |
|                            | Limited Type 1     | 23                  | 6       | 0   | 0    | 6     | 26.1%             | 17.7             | 106            | 27                                        |
|                            | D/F Type 6         | 8                   | 0       | 1   | 0    | 1     | 12.5%             | 8.0              | 8              | 102                                       |
|                            | General            | 41                  | 0       | 0   | 0    | 0     | 0.0%              | 0.0              | 244            |                                           |
|                            | Pooled Total       | 70                  | 6       | 1   | 0    | 7     | 10.0%             | 51.1             | 358            |                                           |
|                            | Pooled Resident    | 57                  | 5       | 0   | 0    | 5     | 8.8%              | 63.6             | 318            |                                           |
|                            | Pooled Nonresident | 13                  | 1       | 1   | 0    | 2     | 15.4%             | 20.0             | 40             |                                           |
| 98 Chain Lakes             |                    |                     |         |     |      |       |                   |                  |                |                                           |
|                            | General            | 9                   | 0       | 0   | 0    | 0     | 0.0%              | 0.0              | 14             |                                           |
|                            | Pooled Total       | 9                   | 0       | 0   | 0    | 0     | 0.0%              | 0.0              | 14             |                                           |
|                            | Pooled Resident    | 9                   | 0       | 0   | 0    | 0     | 0.0%              | 0.0              | 14             |                                           |
|                            | Pooled Nonresident | 0                   | 0       | 0   | 0    | 0     | 0.0%              | 0.0              | 0              |                                           |
| 100 South Wamsutter        |                    |                     |         |     |      |       |                   |                  |                |                                           |
|                            | General            | 9                   | 0       | 0   | 0    | 0     | 0.0%              | 0.0              | 9              |                                           |
|                            | Pooled Total       | 9                   | 0       | 0   | 0    | 0     | 0.0%              | 0.0              | 9              |                                           |
|                            | Pooled Resident    | 9                   | 0       | 0   | 0    | 0     | 0.0%              | 0.0              | 9              |                                           |
|                            | Pooled Nonresident | 0                   | 0       | 0   | 0    | 0     | 0.0%              | 0.0              | 0              |                                           |
| 101 Black Butte            |                    |                     |         |     |      |       |                   |                  |                |                                           |
|                            | Limited Type 1     | 0                   | 0       | 0   | 0    | 0     | 0.0%              | 0.0              | 0              | 79                                        |
|                            | Pooled Total       | 0                   | 0       | 0   | 0    | 0     | 0.0%              | 0.0              | 0              |                                           |
|                            | Pooled Resident    | 0                   | 0       | 0   | 0    | 0     | 0.0%              | 0.0              | 0              |                                           |
|                            | Pooled Nonresident | 0                   | 0       | 0   | 0    | 0     | 0.0%              | 0.0              | 0              |                                           |
| 102 Aspen Mountain         |                    |                     |         |     |      |       |                   |                  |                |                                           |
|                            | Limited Type 1     | 0                   | 0       | 0   | 0    | 0     | 0.0%              | 0.0              | 0              | 402                                       |
|                            | Pooled Total       | 0                   | 0       | 0   | 0    | 0     | 0.0%              | 0.0              | 0              |                                           |
|                            | Pooled Resident    | 0                   | 0       | 0   | 0    | 0     | 0.0%              | 0.0              | 0              |                                           |
|                            | Pooled Nonresident | 0                   | 0       | 0   | 0    | 0     | 0.0%              | 0.0              | 0              |                                           |
| 105 Beartooth              |                    |                     |         |     |      |       |                   |                  |                |                                           |
|                            | General            | 93                  | 17      | 7   | 4    | 28    | 30.1%             | 6.3              | 176            |                                           |
|                            | Pooled Total       | 93                  | 17      | 7   | 4    | 28    | 30.1%             | 6.3              | 176            |                                           |
|                            | Pooled Resident    | 86                  | 14      | 7   | 4    | 25    | 29.1%             | 6.2              | 155            |                                           |
|                            | Pooled Nonresident | 7                   | 3       | 0   | 0    | 3     | 42.9%             | 7.0              | 21             |                                           |
| 106 Crandall-Sunlight      |                    |                     |         |     |      |       |                   |                  |                |                                           |
|                            | General            | 61                  | 0       | 0   | 0    | 0     | 0.0%              | 0.0              | 173            |                                           |
|                            | Pooled Total       | 61                  | 0       | 0   | 0    | 0     | 0.0%              | 0.0              | 173            |                                           |
|                            | Pooled Resident    | 47                  | 0       | 0   | 0    | 0     | 0.0%              | 0.0              | 151            |                                           |
|                            | Pooled Nonresident | 14                  | 0       | 0   | 0    | 0     | 0.0%              | 0.0              | 22             |                                           |
| 109 Bald Ridge             |                    |                     |         |     |      |       |                   |                  |                |                                           |
|                            | Limited Type 1     | 26                  | 0       | 0   | 0    | 0     | 0.0%              | 0.0              | 38             | 50                                        |
|                            | D/F Type 6         | 25                  | 0       | 22  | 3    | 25    | 100.0%            | 1.0              | 25             | 25                                        |
|                            | Pooled Total       | 42                  | 0       | 22  | 3    | 25    | 59.5%             | 2.5              | 63             |                                           |
|                            | Pooled Resident    | 40                  | 0       | 22  | 3    | 25    | 62.5%             | 2.4              | 60             |                                           |
|                            | Pooled Nonresident | 2                   | 0       | 0   | 0    | 0     | 0.0%              | 0.0              | 3              |                                           |
| 110 Grinnell               |                    |                     |         |     |      |       |                   |                  |                |                                           |
|                            | General            | 22                  | 7       | 0   | 0    | 7     | 31.8%             | 8.6              | 60             |                                           |
|                            | Pooled Total       | 22                  | 7       | 0   | 0    | 7     | 31.8%             | 8.6              | 60             |                                           |
|                            | Pooled Resident    | 15                  | 7       | 0   | 0    | 7     | 46.7%             | 7.6              | 53             |                                           |
|                            | Pooled Nonresident | 7                   | 0       | 0   | 0    | 0     | 0.0%              | 0.0              | 7              |                                           |

TABLE II-A (Continued)

## WHITE-TAILED DEER HUNT AREA REPORT

| AREA<br>(cross hunt areas) | TYPE               | ACTIVE<br>LICS/HTRS | HARVEST |     |      |       | HUNTER<br>SUCCESS | DAYS/<br>HARVEST | HUNTER<br>DAYS | LICENSES<br>SOLD<br>(cross hunt<br>incl.) |
|----------------------------|--------------------|---------------------|---------|-----|------|-------|-------------------|------------------|----------------|-------------------------------------------|
|                            |                    |                     | BUCK    | DOE | FAWN | TOTAL |                   |                  |                |                                           |
| 111 Elk Fork               |                    |                     |         |     |      |       |                   |                  |                |                                           |
|                            | D/F Type 6         | 12                  | 0       | 8   | 4    | 12    | 100.0%            | 1.0              | 12             | 76                                        |
|                            | General            | 82                  | 7       | 0   | 0    | 7     | 8.5%              | 22.9             | 160            |                                           |
|                            | Pooled Total       | 91                  | 7       | 8   | 4    | 19    | 20.9%             | 9.1              | 172            |                                           |
|                            | Pooled Resident    | 77                  | 4       | 8   | 4    | 16    | 20.8%             | 9.4              | 151            |                                           |
|                            | Pooled Nonresident | 14                  | 3       | 0   | 0    | 3     | 21.4%             | 7.0              | 21             |                                           |
| 112 Ishawooa               |                    |                     |         |     |      |       |                   |                  |                |                                           |
| (113)                      | D/F Type 6         | 24                  | 0       | 6   | 0    | 6     | 25.0%             | 10.7             | 64             | 252                                       |
|                            | General            | 105                 | 18      | 3   | 0    | 21    | 20.0%             | 9.8              | 206            |                                           |
|                            | Pooled Total       | 118                 | 18      | 9   | 0    | 27    | 22.9%             | 10.0             | 270            |                                           |
|                            | Pooled Resident    | 88                  | 15      | 6   | 0    | 21    | 23.9%             | 8.6              | 180            |                                           |
|                            | Pooled Nonresident | 30                  | 3       | 3   | 0    | 6     | 20.0%             | 15.0             | 90             |                                           |
| 113 Boulder                |                    |                     |         |     |      |       |                   |                  |                |                                           |
| (112)                      | D/F Type 6         | 37                  | 0       | 2   | 2    | 4     | 10.8%             | 26.0             | 104            | 252                                       |
|                            | General            | 154                 | 20      | 4   | 0    | 24    | 15.6%             | 23.5             | 565            |                                           |
|                            | Pooled Total       | 174                 | 20      | 6   | 2    | 28    | 16.1%             | 23.9             | 669            |                                           |
|                            | Pooled Resident    | 129                 | 17      | 6   | 2    | 25    | 19.4%             | 23.6             | 591            |                                           |
|                            | Pooled Nonresident | 45                  | 3       | 0   | 0    | 3     | 6.7%              | 26.0             | 78             |                                           |
| 114 Wall Mountain          |                    |                     |         |     |      |       |                   |                  |                |                                           |
|                            | General            | 4                   | 0       | 0   | 0    | 0     | 0.0%              | 0.0              | 11             |                                           |
|                            | Pooled Total       | 4                   | 0       | 0   | 0    | 0     | 0.0%              | 0.0              | 11             |                                           |
|                            | Pooled Resident    | 4                   | 0       | 0   | 0    | 0     | 0.0%              | 0.0              | 11             |                                           |
|                            | Pooled Nonresident | 0                   | 0       | 0   | 0    | 0     | 0.0%              | 0.0              | 0              |                                           |
| 115 Thorofare              |                    |                     |         |     |      |       |                   |                  |                |                                           |
|                            | General            | 4                   | 0       | 0   | 0    | 0     | 0.0%              | 0.0              | 20             |                                           |
|                            | Pooled Total       | 4                   | 0       | 0   | 0    | 0     | 0.0%              | 0.0              | 20             |                                           |
|                            | Pooled Resident    | 4                   | 0       | 0   | 0    | 0     | 0.0%              | 0.0              | 20             |                                           |
|                            | Pooled Nonresident | 0                   | 0       | 0   | 0    | 0     | 0.0%              | 0.0              | 0              |                                           |
| 116 Meeteetse              |                    |                     |         |     |      |       |                   |                  |                |                                           |
|                            | Limited Type 1     | 76                  | 20      | 0   | 0    | 20    | 26.3%             | 12.6             | 252            | 153                                       |
|                            | Limited Type 2     | 36                  | 30      | 0   | 0    | 30    | 83.3%             | 6.1              | 184            | 40                                        |
|                            | D/F Type 6         | 46                  | 0       | 20  | 0    | 20    | 43.5%             | 6.3              | 126            | 104                                       |
|                            | Pooled Total       | 137                 | 50      | 20  | 0    | 70    | 51.1%             | 8.0              | 562            |                                           |
|                            | Pooled Resident    | 115                 | 39      | 16  | 0    | 55    | 47.8%             | 8.6              | 475            |                                           |
|                            | Pooled Nonresident | 22                  | 11      | 4   | 0    | 15    | 68.2%             | 5.8              | 87             |                                           |
| 117 Franc's Peak           |                    |                     |         |     |      |       |                   |                  |                |                                           |
|                            | Limited Type 1     | 6                   | 0       | 0   | 0    | 0     | 0.0%              | 0.0              | 6              | 53                                        |
|                            | Pooled Total       | 6                   | 0       | 0   | 0    | 0     | 0.0%              | 0.0              | 6              |                                           |
|                            | Pooled Resident    | 6                   | 0       | 0   | 0    | 0     | 0.0%              | 0.0              | 6              |                                           |
|                            | Pooled Nonresident | 0                   | 0       | 0   | 0    | 0     | 0.0%              | 0.0              | 0              |                                           |
| 118 Upper Gooseberry Creek |                    |                     |         |     |      |       |                   |                  |                |                                           |
|                            | Limited Type 1     | 12                  | 0       | 0   | 0    | 0     | 0.0%              | 0.0              | 27             | 78                                        |
| (also valid 116)           | Limited Type 2     | 0                   | 0       | 0   | 0    | 0     | 0.0%              | 0.0              | 0              |                                           |
|                            | D/F Type 6         | 12                  | 0       | 2   | 0    | 2     | 16.7%             | 7.5              | 15             | 35                                        |
|                            | Pooled Total       | 20                  | 0       | 2   | 0    | 2     | 10.0%             | 21.0             | 42             |                                           |
|                            | Pooled Resident    | 14                  | 0       | 2   | 0    | 2     | 14.3%             | 17.5             | 35             |                                           |
|                            | Pooled Nonresident | 6                   | 0       | 0   | 0    | 0     | 0.0%              | 0.0              | 7              |                                           |
| 119 Anchor                 |                    |                     |         |     |      |       |                   |                  |                |                                           |
|                            | Limited Type 1     | 10                  | 0       | 0   | 0    | 0     | 0.0%              | 0.0              | 11             | 104                                       |
| (also valid 120)           | Limited Type 2     | 2                   | 0       | 0   | 0    | 0     | 0.0%              | 0.0              | 9              |                                           |
|                            | D/F Type 6         | 15                  | 0       | 8   | 0    | 8     | 53.3%             | 2.5              | 20             | 50                                        |
|                            | Pooled Total       | 22                  | 0       | 8   | 0    | 8     | 36.4%             | 5.0              | 40             |                                           |
|                            | Pooled Resident    | 19                  | 0       | 8   | 0    | 8     | 42.1%             | 4.5              | 36             |                                           |
|                            | Pooled Nonresident | 3                   | 0       | 0   | 0    | 0     | 0.0%              | 0.0              | 4              |                                           |

TABLE II-A (Continued)

## WHITE-TAILED DEER HUNT AREA REPORT

| AREA<br>(cross hunt areas) | TYPE               | ACTIVE<br>LICS/HTRS | HARVEST |     |      |       | HUNTER<br>SUCCESS | DAYS/<br>HARVEST | HUNTER<br>DAYS | LICENSES                      |
|----------------------------|--------------------|---------------------|---------|-----|------|-------|-------------------|------------------|----------------|-------------------------------|
|                            |                    |                     | BUCK    | DOE | FAWN | TOTAL |                   |                  |                | SOLD<br>(cross hunt<br>incl.) |
| 120 Hamilton Dome          |                    |                     |         |     |      |       |                   |                  |                |                               |
|                            | Limited Type 1     | 55                  | 14      | 4   | 0    | 18    | 32.7%             | 14.4             | 260            | 128                           |
|                            | Limited Type 2     | 24                  | 20      | 0   | 0    | 20    | 83.3%             | 4.5              | 90             | 26                            |
|                            | D/F Type 6         | 50                  | 0       | 28  | 0    | 28    | 56.0%             | 4.1              | 114            | 100                           |
|                            | D/F Type 7         | 27                  | 0       | 14  | 5    | 19    | 70.4%             | 11.9             | 226            | 35                            |
|                            | Pooled Total       | 121                 | 34      | 46  | 5    | 85    | 70.2%             | 8.1              | 690            |                               |
|                            | Pooled Resident    | 90                  | 27      | 34  | 3    | 64    | 71.1%             | 7.3              | 464            |                               |
|                            | Pooled Nonresident | 31                  | 7       | 12  | 2    | 21    | 67.7%             | 10.8             | 226            |                               |
| 121 Heart Mountain         |                    |                     |         |     |      |       |                   |                  |                |                               |
| (122)                      | Limited Type 1     | 13                  | 11      | 0   | 0    | 11    | 84.6%             | 8.6              | 95             | 28                            |
|                            | General            | 312                 | 62      | 22  | 4    | 88    | 28.2%             | 10.2             | 894            |                               |
|                            | Pooled Total       | 325                 | 73      | 22  | 4    | 99    | 30.5%             | 10.0             | 989            |                               |
|                            | Pooled Resident    | 315                 | 73      | 22  | 4    | 99    | 31.4%             | 9.9              | 977            |                               |
|                            | Pooled Nonresident | 10                  | 0       | 0   | 0    | 0     | 0.0%              | 0.0              | 12             |                               |
| 122 Shoshone River         |                    |                     |         |     |      |       |                   |                  |                |                               |
| (121)                      | Limited Type 1     | 11                  | 11      | 0   | 0    | 11    | 100.0%            | 9.8              | 108            | 28                            |
|                            | D/F Type 6         | 26                  | 0       | 5   | 6    | 11    | 42.3%             | 22.2             | 244            | 50                            |
|                            | General            | 560                 | 117     | 33  | 7    | 157   | 28.0%             | 13.1             | 2051           |                               |
|                            | Pooled Total       | 581                 | 128     | 38  | 13   | 179   | 30.8%             | 13.4             | 2403           |                               |
|                            | Pooled Resident    | 547                 | 114     | 38  | 12   | 164   | 30.0%             | 12.0             | 1966           |                               |
|                            | Pooled Nonresident | 34                  | 14      | 0   | 1    | 15    | 44.1%             | 29.1             | 437            |                               |
| 123 Yellowtail             |                    |                     |         |     |      |       |                   |                  |                |                               |
|                            | General            | 167                 | 18      | 4   | 0    | 22    | 13.2%             | 23.6             | 520            |                               |
|                            | Pooled Total       | 167                 | 18      | 4   | 0    | 22    | 13.2%             | 23.6             | 520            |                               |
|                            | Pooled Resident    | 150                 | 18      | 4   | 0    | 22    | 14.7%             | 22.6             | 497            |                               |
|                            | Pooled Nonresident | 17                  | 0       | 0   | 0    | 0     | 0.0%              | 0.0              | 23             |                               |
| 124 Emblem                 |                    |                     |         |     |      |       |                   |                  |                |                               |
|                            | Limited Type 1     | 54                  | 28      | 2   | 0    | 30    | 55.6%             | 10.7             | 320            | 58                            |
|                            | D/F Type 6         | 116                 | 0       | 15  | 13   | 28    | 24.1%             | 18.4             | 515            | 204                           |
|                            | D/F Type 7         | 49                  | 0       | 24  | 5    | 29    | 59.2%             | 10.2             | 295            | 125                           |
|                            | General            | 346                 | 59      | 22  | 0    | 81    | 23.4%             | 12.9             | 1043           |                               |
|                            | Pooled Total       | 506                 | 87      | 63  | 18   | 168   | 33.2%             | 12.9             | 2173           |                               |
|                            | Pooled Resident    | 434                 | 76      | 54  | 16   | 146   | 33.6%             | 13.7             | 1996           |                               |
|                            | Pooled Nonresident | 72                  | 11      | 9   | 2    | 22    | 30.6%             | 8.0              | 177            |                               |
| 125 Fifteen Mile           |                    |                     |         |     |      |       |                   |                  |                |                               |
|                            | Limited Type 1     | 7                   | 0       | 0   | 0    | 0     | 0.0%              | 0.0              | 7              | 135                           |
|                            | D/F Type 6         | 0                   | 0       | 0   | 0    | 0     | 0.0%              | 0.0              | 0              | 24                            |
|                            | Pooled Total       | 7                   | 0       | 0   | 0    | 0     | 0.0%              | 0.0              | 7              |                               |
|                            | Pooled Resident    | 7                   | 0       | 0   | 0    | 0     | 0.0%              | 0.0              | 7              |                               |
|                            | Pooled Nonresident | 0                   | 0       | 0   | 0    | 0     | 0.0%              | 0.0              | 0              |                               |
| 127 Cottonwood             |                    |                     |         |     |      |       |                   |                  |                |                               |
| (37)                       | Limited Type 2     | 9                   | 6       | 0   | 0    | 6     | 66.7%             | 9.5              | 57             | 25                            |
|                            | D/F Type 6         | 41                  | 0       | 20  | 9    | 29    | 70.7%             | 3.8              | 110            | 87                            |
| (37)                       | D/F Type 7         | 16                  | 0       | 7   | 2    | 9     | 56.3%             | 18.3             | 165            | 35                            |
|                            | General            | 67                  | 7       | 4   | 0    | 11    | 16.4%             | 28.8             | 317            |                               |
|                            | Pooled Total       | 113                 | 13      | 31  | 11   | 55    | 48.7%             | 11.8             | 649            |                               |
|                            | Pooled Resident    | 111                 | 11      | 31  | 11   | 53    | 47.7%             | 12.0             | 636            |                               |
|                            | Pooled Nonresident | 2                   | 2       | 0   | 0    | 2     | 100.0%            | 6.5              | 13             |                               |
| 128 Wind River             |                    |                     |         |     |      |       |                   |                  |                |                               |
|                            | Limited Type 1     | 7                   | 0       | 0   | 0    | 0     | 0.0%              | 0.0              | 15             | 107                           |
|                            | Limited Type 2     | 41                  | 7       | 9   | 2    | 18    | 43.9%             | 16.6             | 299            | 50                            |
|                            | D/F Type 6         | 9                   | 0       | 4   | 0    | 4     | 44.4%             | 17.8             | 71             | 100                           |
|                            | D/F Type 7         | 5                   | 0       | 0   | 0    | 0     | 0.0%              | 0.0              | 20             | 150                           |
|                            | General            | 118                 | 9       | 0   | 0    | 9     | 7.6%              | 26.7             | 240            |                               |
|                            | Pooled Total       | 174                 | 16      | 13  | 2    | 31    | 17.8%             | 20.8             | 645            |                               |
|                            | Pooled Resident    | 163                 | 16      | 13  | 2    | 31    | 19.0%             | 18.6             | 576            |                               |
|                            | Pooled Nonresident | 11                  | 0       | 0   | 0    | 0     | 0.0%              | 0.0              | 69             |                               |

TABLE II-A (Continued)

## WHITE-TAILED DEER HUNT AREA REPORT

| AREA<br>(cross hunt areas) | TYPE                 | ACTIVE<br>LICS/HTRS | HARVEST |     |      |       | HUNTER<br>SUCCESS | DAYS/<br>HARVEST | HUNTER<br>DAYS | LICENSES<br>SOLD<br>(cross hunt<br>incl.) |
|----------------------------|----------------------|---------------------|---------|-----|------|-------|-------------------|------------------|----------------|-------------------------------------------|
|                            |                      |                     | BUCK    | DOE | FAWN | TOTAL |                   |                  |                |                                           |
| 130 Big Sandy              |                      |                     |         |     |      |       |                   |                  |                |                                           |
|                            | Limited Type 1       | 0                   | 0       | 0   | 0    | 0     | 0.0%              | 0.0              | 0              | 26                                        |
|                            | D/F Type 6           | 0                   | 0       | 0   | 0    | 0     | 0.0%              | 0.0              | 0              | 11                                        |
|                            | General              | 12                  | 0       | 0   | 0    | 0     | 0.0%              | 0.0              | 12             |                                           |
|                            | Pooled Total         | 12                  | 0       | 0   | 0    | 0     | 0.0%              | 0.0              | 12             |                                           |
|                            | Pooled Resident      | 12                  | 0       | 0   | 0    | 0     | 0.0%              | 0.0              | 12             |                                           |
|                            | Pooled Nonresident   | 0                   | 0       | 0   | 0    | 0     | 0.0%              | 0.0              | 0              |                                           |
| 131 Steamboat              |                      |                     |         |     |      |       |                   |                  |                |                                           |
|                            | Limited Type 2       | 0                   | 0       | 0   | 0    | 0     | 0.0%              | 0.0              | 0              | 55                                        |
|                            | General              | 24                  | 4       | 0   | 0    | 4     | 16.7%             | 8.5              | 34             |                                           |
|                            | Pooled Total         | 24                  | 4       | 0   | 0    | 4     | 16.7%             | 8.5              | 34             |                                           |
|                            | Pooled Resident      | 24                  | 4       | 0   | 0    | 4     | 16.7%             | 8.5              | 34             |                                           |
|                            | Pooled Nonresident   | 0                   | 0       | 0   | 0    | 0     | 0.0%              | 0.0              | 0              |                                           |
| 132 Cedar Mountain         |                      |                     |         |     |      |       |                   |                  |                |                                           |
|                            | General              | 27                  | 3       | 0   | 0    | 3     | 11.1%             | 22.3             | 67             |                                           |
|                            | Pooled Total         | 27                  | 3       | 0   | 0    | 3     | 11.1%             | 22.3             | 67             |                                           |
|                            | Pooled Resident      | 24                  | 0       | 0   | 0    | 0     | 0.0%              | 0.0              | 58             |                                           |
|                            | Pooled Nonresident   | 3                   | 3       | 0   | 0    | 3     | 100.0%            | 3.0              | 9              |                                           |
| 133 Uinta                  |                      |                     |         |     |      |       |                   |                  |                |                                           |
|                            | General              | 33                  | 0       | 0   | 0    | 0     | 0.0%              | 0.0              | 65             |                                           |
|                            | Pooled Total         | 33                  | 0       | 0   | 0    | 0     | 0.0%              | 0.0              | 65             |                                           |
|                            | Pooled Resident      | 33                  | 0       | 0   | 0    | 0     | 0.0%              | 0.0              | 65             |                                           |
|                            | Pooled Nonresident   | 0                   | 0       | 0   | 0    | 0     | 0.0%              | 0.0              | 0              |                                           |
| 134 Bear River Divide      |                      |                     |         |     |      |       |                   |                  |                |                                           |
|                            | General              | 20                  | 8       | 0   | 0    | 8     | 40.0%             | 5.9              | 47             |                                           |
|                            | Pooled Total         | 20                  | 8       | 0   | 0    | 8     | 40.0%             | 5.9              | 47             |                                           |
|                            | Pooled Resident      | 20                  | 8       | 0   | 0    | 8     | 40.0%             | 5.9              | 47             |                                           |
|                            | Pooled Nonresident   | 0                   | 0       | 0   | 0    | 0     | 0.0%              | 0.0              | 0              |                                           |
| 135 West Green River       |                      |                     |         |     |      |       |                   |                  |                |                                           |
|                            | General              | 58                  | 0       | 0   | 0    | 0     | 0.0%              | 0.0              | 119            |                                           |
|                            | Pooled Total         | 58                  | 0       | 0   | 0    | 0     | 0.0%              | 0.0              | 119            |                                           |
|                            | Pooled Resident      | 58                  | 0       | 0   | 0    | 0     | 0.0%              | 0.0              | 119            |                                           |
|                            | Pooled Nonresident   | 0                   | 0       | 0   | 0    | 0     | 0.0%              | 0.0              | 0              |                                           |
| 138 Boulder                |                      |                     |         |     |      |       |                   |                  |                |                                           |
|                            | General              | 56                  | 0       | 0   | 0    | 0     | 0.0%              | 0.0              | 196            |                                           |
|                            | Pooled Total         | 56                  | 0       | 0   | 0    | 0     | 0.0%              | 0.0              | 196            |                                           |
|                            | Pooled Resident      | 56                  | 0       | 0   | 0    | 0     | 0.0%              | 0.0              | 196            |                                           |
|                            | Pooled Nonresident   | 0                   | 0       | 0   | 0    | 0     | 0.0%              | 0.0              | 0              |                                           |
| 139 Pinedale               |                      |                     |         |     |      |       |                   |                  |                |                                           |
|                            | General              | 93                  | 5       | 4   | 0    | 9     | 9.7%              | 21.7             | 195            |                                           |
|                            | Pooled Total         | 93                  | 5       | 4   | 0    | 9     | 9.7%              | 21.7             | 195            |                                           |
|                            | Pooled Resident      | 89                  | 5       | 4   | 0    | 9     | 10.1%             | 18.6             | 167            |                                           |
|                            | Pooled Nonresident   | 4                   | 0       | 0   | 0    | 0     | 0.0%              | 0.0              | 28             |                                           |
| 140 New Fork               |                      |                     |         |     |      |       |                   |                  |                |                                           |
|                            | General              | 29                  | 0       | 0   | 0    | 0     | 0.0%              | 0.0              | 74             |                                           |
|                            | Pooled Total         | 29                  | 0       | 0   | 0    | 0     | 0.0%              | 0.0              | 74             |                                           |
|                            | Pooled Resident      | 25                  | 0       | 0   | 0    | 0     | 0.0%              | 0.0              | 67             |                                           |
|                            | Pooled Nonresident   | 4                   | 0       | 0   | 0    | 0     | 0.0%              | 0.0              | 7              |                                           |
| 141 Green River            |                      |                     |         |     |      |       |                   |                  |                |                                           |
|                            | (162) Limited Type 1 | 2                   | 0       | 0   | 0    | 0     | 0.0%              | 0.0              | 3              | 125                                       |
|                            | Pooled Total         | 2                   | 0       | 0   | 0    | 0     | 0.0%              | 0.0              | 3              |                                           |
|                            | Pooled Resident      | 0                   | 0       | 0   | 0    | 0     | 0.0%              | 0.0              | 0              |                                           |
|                            | Pooled Nonresident   | 2                   | 0       | 0   | 0    | 0     | 0.0%              | 0.0              | 3              |                                           |



TABLE II-A (Continued)

## WHITE-TAILED DEER HUNT AREA REPORT

| AREA<br>(cross hunt areas) | TYPE    | ACTIVE<br>LICS/HTRS | HARVEST |     |      |       | HUNTER<br>SUCCESS | DAYS/<br>HARVEST | HUNTER<br>DAYS | LICENSES                      |
|----------------------------|---------|---------------------|---------|-----|------|-------|-------------------|------------------|----------------|-------------------------------|
|                            |         |                     | BUCK    | DOE | FAWN | TOTAL |                   |                  |                | SOLD<br>(cross hunt<br>incl.) |
|                            |         |                     |         |     |      |       |                   |                  |                |                               |
| 142 Piney-Horse Creek      | General | 30                  | 5       | 0   | 0    | 5     | 16.7%             | 43.4             | 217            |                               |
| Pooled Total               |         | 30                  | 5       | 0   | 0    | 5     | 16.7%             | 43.4             | 217            |                               |
| Pooled Resident            |         | 26                  | 5       | 0   | 0    | 5     | 19.2%             | 8.4              | 42             |                               |
| Pooled Nonresident         |         | 4                   | 0       | 0   | 0    | 0     | 0.0%              | 0.0              | 175            |                               |
|                            |         |                     |         |     |      |       |                   |                  |                |                               |
| 143 South Piney            | General | 25                  | 0       | 0   | 0    | 0     | 0.0%              | 0.0              | 61             |                               |
| Pooled Total               |         | 25                  | 0       | 0   | 0    | 0     | 0.0%              | 0.0              | 61             |                               |
| Pooled Resident            |         | 25                  | 0       | 0   | 0    | 0     | 0.0%              | 0.0              | 61             |                               |
| Pooled Nonresident         |         | 0                   | 0       | 0   | 0    | 0     | 0.0%              | 0.0              | 0              |                               |
|                            |         |                     |         |     |      |       |                   |                  |                |                               |
| 144 Greys River            | General | 20                  | 0       | 0   | 0    | 0     | 0.0%              | 0.0              | 47             |                               |
| Pooled Total               |         | 20                  | 0       | 0   | 0    | 0     | 0.0%              | 0.0              | 47             |                               |
| Pooled Resident            |         | 20                  | 0       | 0   | 0    | 0     | 0.0%              | 0.0              | 47             |                               |
| Pooled Nonresident         |         | 0                   | 0       | 0   | 0    | 0     | 0.0%              | 0.0              | 0              |                               |
|                            |         |                     |         |     |      |       |                   |                  |                |                               |
| 145 Salt River             | General | 52                  | 15      | 0   | 0    | 15    | 28.8%             | 13.5             | 203            |                               |
| Pooled Total               |         | 52                  | 15      | 0   | 0    | 15    | 28.8%             | 13.5             | 203            |                               |
| Pooled Resident            |         | 49                  | 15      | 0   | 0    | 15    | 30.6%             | 12.5             | 187            |                               |
| Pooled Nonresident         |         | 3                   | 0       | 0   | 0    | 0     | 0.0%              | 0.0              | 16             |                               |
|                            |         |                     |         |     |      |       |                   |                  |                |                               |
| 146 Fish Creek             | General | 4                   | 4       | 0   | 0    | 4     | 100.0%            | 1.0              | 4              |                               |
| Pooled Total               |         | 4                   | 4       | 0   | 0    | 4     | 100.0%            | 1.0              | 4              |                               |
| Pooled Resident            |         | 0                   | 0       | 0   | 0    | 0     | 0.0%              | 0.0              | 0              |                               |
| Pooled Nonresident         |         | 4                   | 4       | 0   | 0    | 4     | 100.0%            | 1.0              | 4              |                               |
|                            |         |                     |         |     |      |       |                   |                  |                |                               |
| 148 Teton                  | General | 4                   | 0       | 0   | 0    | 0     | 0.0%              | 0.0              | 8              |                               |
| Pooled Total               |         | 4                   | 0       | 0   | 0    | 0     | 0.0%              | 0.0              | 8              |                               |
| Pooled Resident            |         | 4                   | 0       | 0   | 0    | 0     | 0.0%              | 0.0              | 8              |                               |
| Pooled Nonresident         |         | 0                   | 0       | 0   | 0    | 0     | 0.0%              | 0.0              | 0              |                               |
|                            |         |                     |         |     |      |       |                   |                  |                |                               |
| 149 Targhee                | General | 15                  | 0       | 0   | 0    | 0     | 0.0%              | 0.0              | 29             |                               |
| Pooled Total               |         | 15                  | 0       | 0   | 0    | 0     | 0.0%              | 0.0              | 29             |                               |
| Pooled Resident            |         | 11                  | 0       | 0   | 0    | 0     | 0.0%              | 0.0              | 16             |                               |
| Pooled Nonresident         |         | 4                   | 0       | 0   | 0    | 0     | 0.0%              | 0.0              | 13             |                               |
|                            |         |                     |         |     |      |       |                   |                  |                |                               |
| 150 Wilson                 | General | 0                   | 0       | 0   | 0    | 0     | 0.0%              | 0.0              | 0              |                               |
| Pooled Total               |         | 0                   | 0       | 0   | 0    | 0     | 0.0%              | 0.0              | 0              |                               |
| Pooled Resident            |         | 0                   | 0       | 0   | 0    | 0     | 0.0%              | 0.0              | 0              |                               |
| Pooled Nonresident         |         | 0                   | 0       | 0   | 0    | 0     | 0.0%              | 0.0              | 0              |                               |
|                            |         |                     |         |     |      |       |                   |                  |                |                               |
| 151 Fall Creek             | General | 27                  | 4       | 0   | 0    | 4     | 14.8%             | 8.3              | 33             |                               |
| Pooled Total               |         | 27                  | 4       | 0   | 0    | 4     | 14.8%             | 8.3              | 33             |                               |
| Pooled Resident            |         | 27                  | 4       | 0   | 0    | 4     | 14.8%             | 8.3              | 33             |                               |
| Pooled Nonresident         |         | 0                   | 0       | 0   | 0    | 0     | 0.0%              | 0.0              | 0              |                               |
|                            |         |                     |         |     |      |       |                   |                  |                |                               |
| 152 Lower Hoback           | General | 29                  | 4       | 4   | 0    | 8     | 27.6%             | 5.8              | 46             |                               |
| Pooled Total               |         | 29                  | 4       | 4   | 0    | 8     | 27.6%             | 5.8              | 46             |                               |
| Pooled Resident            |         | 29                  | 4       | 4   | 0    | 8     | 27.6%             | 5.8              | 46             |                               |
| Pooled Nonresident         |         | 0                   | 0       | 0   | 0    | 0     | 0.0%              | 0.0              | 0              |                               |
|                            |         |                     |         |     |      |       |                   |                  |                |                               |
| 153 Monument Ridge         | General | 4                   | 0       | 0   | 0    | 0     | 0.0%              | 0.0              | 5              |                               |
| Pooled Total               |         | 4                   | 0       | 0   | 0    | 0     | 0.0%              | 0.0              | 5              |                               |
| Pooled Resident            |         | 4                   | 0       | 0   | 0    | 0     | 0.0%              | 0.0              | 5              |                               |
| Pooled Nonresident         |         | 0                   | 0       | 0   | 0    | 0     | 0.0%              | 0.0              | 0              |                               |

TABLE II-A (Continued)

## WHITE-TAILED DEER HUNT AREA REPORT

| AREA<br>(cross hunt areas) | TYPE                           | ACTIVE<br>LICS/HTRS | HARVEST |     |      |       | HUNTER<br>SUCCESS | DAYS/<br>HARVEST | HUNTER<br>DAYS | LICENSES<br>SOLD<br>(cross hunt<br>incl.) |
|----------------------------|--------------------------------|---------------------|---------|-----|------|-------|-------------------|------------------|----------------|-------------------------------------------|
|                            |                                |                     | BUCK    | DOE | FAWN | TOTAL |                   |                  |                |                                           |
| 154 Raspberry Ridge        |                                |                     |         |     |      |       |                   |                  |                |                                           |
|                            | General                        | 15                  | 0       | 0   | 0    | 0     | 0.0%              | 0.0              | 238            |                                           |
|                            | Pooled Total                   | 15                  | 0       | 0   | 0    | 0     | 0.0%              | 0.0              | 238            |                                           |
|                            | Pooled Resident                | 11                  | 0       | 0   | 0    | 0     | 0.0%              | 0.0              | 63             |                                           |
|                            | Pooled Nonresident             | 4                   | 0       | 0   | 0    | 0     | 0.0%              | 0.0              | 175            |                                           |
| 155 Crystal Peak           |                                |                     |         |     |      |       |                   |                  |                |                                           |
|                            | General                        | 12                  | 0       | 4   | 0    | 4     | 33.3%             | 12.0             | 48             |                                           |
|                            | Pooled Total                   | 12                  | 0       | 4   | 0    | 4     | 33.3%             | 12.0             | 48             |                                           |
|                            | Pooled Resident                | 12                  | 0       | 4   | 0    | 4     | 33.3%             | 12.0             | 48             |                                           |
|                            | Pooled Nonresident             | 0                   | 0       | 0   | 0    | 0     | 0.0%              | 0.0              | 0              |                                           |
| 156 Spread Creek           |                                |                     |         |     |      |       |                   |                  |                |                                           |
|                            | General                        | 19                  | 0       | 0   | 0    | 0     | 0.0%              | 0.0              | 50             |                                           |
|                            | Pooled Total                   | 19                  | 0       | 0   | 0    | 0     | 0.0%              | 0.0              | 50             |                                           |
|                            | Pooled Resident                | 15                  | 0       | 0   | 0    | 0     | 0.0%              | 0.0              | 41             |                                           |
|                            | Pooled Nonresident             | 4                   | 0       | 0   | 0    | 0     | 0.0%              | 0.0              | 9              |                                           |
| 157 Boysen                 |                                |                     |         |     |      |       |                   |                  |                |                                           |
|                            | (170) Limited Type 1           | 49                  | 8       | 0   | 0    | 8     | 16.3%             | 17.9             | 143            | 255                                       |
|                            | (170) Limited Type 2           | 65                  | 36      | 6   | 0    | 42    | 64.6%             | 12.0             | 506            | 77                                        |
|                            | (170) D/F Type 6               | 87                  | 0       | 8   | 15   | 23    | 26.4%             | 7.9              | 181            | 330                                       |
|                            | (170) D/F Type 7               | 82                  | 0       | 40  | 8    | 48    | 58.5%             | 8.5              | 407            | 97                                        |
|                            | Pooled Total                   | 214                 | 44      | 54  | 23   | 121   | 56.5%             | 10.2             | 1237           |                                           |
|                            | Pooled Resident                | 189                 | 37      | 49  | 22   | 108   | 57.1%             | 10.8             | 1165           |                                           |
|                            | Pooled Nonresident             | 25                  | 7       | 5   | 1    | 13    | 52.0%             | 5.5              | 72             |                                           |
| 158 Ormsby                 |                                |                     |         |     |      |       |                   |                  |                |                                           |
|                            | (also valid 22) Limited Type 1 | 18                  | 0       | 0   | 4    | 4     | 22.2%             | 6.0              | 24             | 411                                       |
|                            | (22) D/F Type 6                | 33                  | 0       | 13  | 5    | 18    | 54.5%             | 4.4              | 80             | 286                                       |
|                            | General                        | 52                  | 4       | 4   | 4    | 12    | 23.1%             | 17.8             | 214            |                                           |
|                            | Pooled Total                   | 98                  | 4       | 17  | 13   | 34    | 34.7%             | 9.4              | 318            |                                           |
|                            | Pooled Resident                | 87                  | 4       | 17  | 13   | 34    | 39.1%             | 8.9              | 304            |                                           |
|                            | Pooled Nonresident             | 11                  | 0       | 0   | 0    | 0     | 0.0%              | 0.0              | 14             |                                           |
| 160 Beaver Creek           |                                |                     |         |     |      |       |                   |                  |                |                                           |
|                            | (94) D/F Type 6                | 6                   | 0       | 0   | 2    | 2     | 33.3%             | 4.0              | 8              | 54                                        |
|                            | General                        | 37                  | 0       | 0   | 0    | 0     | 0.0%              | 0.0              | 289            |                                           |
|                            | Pooled Total                   | 43                  | 0       | 0   | 2    | 2     | 4.7%              | 148.5            | 297            |                                           |
|                            | Pooled Resident                | 43                  | 0       | 0   | 2    | 2     | 4.7%              | 148.5            | 297            |                                           |
|                            | Pooled Nonresident             | 0                   | 0       | 0   | 0    | 0     | 0.0%              | 0.0              | 0              |                                           |
| 161 St. Mary's Creek       |                                |                     |         |     |      |       |                   |                  |                |                                           |
|                            | General                        | 12                  | 0       | 0   | 0    | 0     | 0.0%              | 0.0              | 20             |                                           |
|                            | Pooled Total                   | 12                  | 0       | 0   | 0    | 0     | 0.0%              | 0.0              | 20             |                                           |
|                            | Pooled Resident                | 12                  | 0       | 0   | 0    | 0     | 0.0%              | 0.0              | 20             |                                           |
|                            | Pooled Nonresident             | 0                   | 0       | 0   | 0    | 0     | 0.0%              | 0.0              | 0              |                                           |
| 162 Water Dog Lakes        |                                |                     |         |     |      |       |                   |                  |                |                                           |
|                            | (141) Limited Type 1           | 0                   | 0       | 0   | 0    | 0     | 0.0%              | 0.0              | 0              | 125                                       |
|                            | Pooled Total                   | 0                   | 0       | 0   | 0    | 0     | 0.0%              | 0.0              | 0              |                                           |
|                            | Pooled Resident                | 0                   | 0       | 0   | 0    | 0     | 0.0%              | 0.0              | 0              |                                           |
|                            | Pooled Nonresident             | 0                   | 0       | 0   | 0    | 0     | 0.0%              | 0.0              | 0              |                                           |

TABLE II-A (Continued)

## WHITE-TAILED DEER HUNT AREA REPORT

| AREA<br>(cross hunt areas) | TYPE               | ACTIVE<br>LICS/HTRS | HARVEST |     |      |       | HUNTER<br>SUCCESS | DAYS/<br>HARVEST | HUNTER<br>DAYS | LICENSES<br>SOLD<br>(cross hunt<br>incl.) |
|----------------------------|--------------------|---------------------|---------|-----|------|-------|-------------------|------------------|----------------|-------------------------------------------|
|                            |                    |                     | BUCK    | DOE | FAWN | TOTAL |                   |                  |                |                                           |
| 163 Middle Fork            |                    |                     |         |     |      |       |                   |                  |                |                                           |
|                            | General            | 7                   | 0       | 0   | 0    | 0     | 0.0%              | 0.0              | 8              |                                           |
|                            | Pooled Total       | 7                   | 0       | 0   | 0    | 0     | 0.0%              | 0.0              | 8              |                                           |
|                            | Pooled Resident    | 0                   | 0       | 0   | 0    | 0     | 0.0%              | 0.0              | 0              |                                           |
|                            | Pooled Nonresident | 7                   | 0       | 0   | 0    | 0     | 0.0%              | 0.0              | 8              |                                           |
| 164 Nowater                |                    |                     |         |     |      |       |                   |                  |                |                                           |
|                            | Limited Type 1     | 25                  | 11      | 5   | 0    | 16    | 64.0%             | 11.5             | 184            | 27                                        |
|                            | D/F Type 6         | 12                  | 0       | 2   | 2    | 4     | 33.3%             | 12.0             | 48             | 75                                        |
|                            | General            | 131                 | 43      | 0   | 4    | 47    | 35.9%             | 8.8              | 412            |                                           |
|                            | Pooled Total       | 165                 | 54      | 7   | 6    | 67    | 40.6%             | 9.6              | 644            |                                           |
|                            | Pooled Resident    | 139                 | 47      | 7   | 6    | 60    | 43.2%             | 9.4              | 566            |                                           |
|                            | Pooled Nonresident | 26                  | 7       | 0   | 0    | 7     | 26.9%             | 11.1             | 78             |                                           |
| 165 YU Bench               |                    |                     |         |     |      |       |                   |                  |                |                                           |
|                            | Limited Type 1     | 41                  | 7       | 2   | 0    | 9     | 22.0%             | 8.0              | 72             | 107                                       |
|                            | Limited Type 2     | 47                  | 23      | 7   | 4    | 34    | 72.3%             | 11.7             | 397            | 54                                        |
|                            | D/F Type 6         | 62                  | 0       | 24  | 6    | 30    | 48.4%             | 9.3              | 280            | 167                                       |
|                            | Pooled Total       | 114                 | 30      | 33  | 10   | 73    | 64.0%             | 10.3             | 749            |                                           |
|                            | Pooled Resident    | 95                  | 23      | 31  | 8    | 62    | 65.3%             | 10.5             | 648            |                                           |
|                            | Pooled Nonresident | 19                  | 7       | 2   | 2    | 11    | 57.9%             | 9.2              | 101            |                                           |
| 167 Dull Center            |                    |                     |         |     |      |       |                   |                  |                |                                           |
| (11, 12, 13, 14, 15)       | Limited Type 1     | 20                  | 6       | 4   | 0    | 10    | 50.0%             | 7.6              | 76             | 300                                       |
| (11, 12, 13, 14, 15)       | D/F Type 7         | 3                   | 0       | 0   | 0    | 0     | 0.0%              | 0.0              | 3              | 158                                       |
|                            | General            | 27                  | 4       | 0   | 0    | 4     | 14.8%             | 16.3             | 65             |                                           |
|                            | Pooled Total       | 50                  | 10      | 4   | 0    | 14    | 28.0%             | 10.3             | 144            |                                           |
|                            | Pooled Resident    | 38                  | 8       | 4   | 0    | 12    | 31.6%             | 10.8             | 130            |                                           |
|                            | Pooled Nonresident | 12                  | 2       | 0   | 0    | 2     | 16.7%             | 7.0              | 14             |                                           |
| 168 Medicine Butte         |                    |                     |         |     |      |       |                   |                  |                |                                           |
|                            | General            | 15                  | 0       | 0   | 0    | 0     | 0.0%              | 0.0              | 33             |                                           |
|                            | Pooled Total       | 15                  | 0       | 0   | 0    | 0     | 0.0%              | 0.0              | 33             |                                           |
|                            | Pooled Resident    | 15                  | 0       | 0   | 0    | 0     | 0.0%              | 0.0              | 33             |                                           |
|                            | Pooled Nonresident | 0                   | 0       | 0   | 0    | 0     | 0.0%              | 0.0              | 0              |                                           |
| 169 Tisdale Mountain       |                    |                     |         |     |      |       |                   |                  |                |                                           |
|                            | General            | 4                   | 0       | 0   | 0    | 0     | 0.0%              | 0.0              | 4              |                                           |
|                            | Pooled Total       | 4                   | 0       | 0   | 0    | 0     | 0.0%              | 0.0              | 4              |                                           |
|                            | Pooled Resident    | 0                   | 0       | 0   | 0    | 0     | 0.0%              | 0.0              | 0              |                                           |
|                            | Pooled Nonresident | 4                   | 0       | 0   | 0    | 0     | 0.0%              | 0.0              | 4              |                                           |
| 170 Riverview              |                    |                     |         |     |      |       |                   |                  |                |                                           |
| (157)                      | Limited Type 1     | 14                  | 2       | 3   | 0    | 5     | 35.7%             | 5.2              | 26             | 255                                       |
| (157)                      | Limited Type 2     | 17                  | 8       | 2   | 0    | 10    | 58.8%             | 11.4             | 114            | 77                                        |
| (157)                      | D/F Type 6         | 9                   | 0       | 6   | 0    | 6     | 66.7%             | 1.5              | 9              | 330                                       |
| (157)                      | D/F Type 7         | 3                   | 0       | 2   | 0    | 2     | 66.7%             | 1.5              | 3              | 97                                        |
|                            | Pooled Total       | 43                  | 10      | 13  | 0    | 23    | 53.5%             | 6.6              | 152            |                                           |
|                            | Pooled Resident    | 39                  | 9       | 13  | 0    | 22    | 56.4%             | 5.7              | 126            |                                           |
|                            | Pooled Nonresident | 4                   | 1       | 0   | 0    | 1     | 25.0%             | 26.0             | 26             |                                           |
| 171 Crowheart Butte        |                    |                     |         |     |      |       |                   |                  |                |                                           |
|                            | Limited 1          | 20                  | 18      | 0   | 0    | 18    | 90.0%             | 5.9              | 106            | 35                                        |
|                            | General            | 113                 | 40      | 4   | 0    | 44    | 38.9%             | 7.5              | 332            |                                           |
|                            | Pooled Total       | 133                 | 58      | 4   | 0    | 62    | 46.6%             | 7.1              | 438            |                                           |
|                            | Pooled Resident    | 133                 | 58      | 4   | 0    | 62    | 46.6%             | 7.1              | 438            |                                           |
|                            | Pooled Nonresident | 0                   | 0       | 0   | 0    | 0     | 0.0%              | 0.0              | 0              |                                           |

TABLE II-H  
WHITE-TAILED DEER HARVEST  
BY HERD UNIT  
2007

| HERD                  | TYPE          | ACTIVE<br>LICS/HTRS | HARVEST |      |      |       | HUNTER<br>SUCCESS | DAYS/<br>HARVEST | HUNTER<br>DAYS | LICENSES<br>SOLD      |
|-----------------------|---------------|---------------------|---------|------|------|-------|-------------------|------------------|----------------|-----------------------|
|                       |               |                     | BUCK    | DOE  | FAWN | TOTAL |                   |                  |                | (cross hunt<br>incl.) |
| 201 Bighorn Basin     | D/F           | 847                 | 0       | 300  | 94   | 394   | 46.5%             | 8.0              | 3158           | 2573                  |
|                       | Limited       | 595                 | 266     | 23   | 4    | 293   | 49.2%             | 11.0             | 3210           | 1374                  |
|                       | General       | 2600                | 492     | 118  | 19   | 629   | 24.2%             | 13.9             | 8766           |                       |
|                       | Total Hunters | 3619                | 758     | 441  | 117  | 1316  | 36.4%             | 11.5             | 15134          |                       |
|                       | Resident      | 2906                | 628     | 372  | 100  | 1100  | 37.9%             | 11.7             | 12873          |                       |
|                       | Nonresident   | 713                 | 130     | 69   | 17   | 216   | 30.3%             | 10.5             | 2261           |                       |
| 303 Powder River      | D/F           | 2943                | 0       | 1747 | 288  | 2035  | 69.1%             | 8.0              | 16336          | 5559                  |
|                       | Limited       | 120                 | 90      | 7    | 2    | 99    | 82.5%             | 4.5              | 447            | 145                   |
|                       | General       | 4391                | 1951    | 339  | 75   | 2365  | 53.9%             | 8.2              | 19422          |                       |
|                       | Total Hunters | 6635                | 2041    | 2093 | 365  | 4499  | 67.8%             | 8.0              | 36205          |                       |
|                       | Resident      | 4438                | 1482    | 1442 | 218  | 3142  | 70.8%             | 9.1              | 28616          |                       |
|                       | Nonresident   | 2197                | 559     | 651  | 147  | 1357  | 61.8%             | 5.6              | 7589           |                       |
| 504 Southeast Wyoming | D/F           | 174                 | 0       | 73   | 6    | 79    | 45.4%             | 6.4              | 504            | 756                   |
|                       | Limited       | 352                 | 209     | 18   | 6    | 233   | 66.2%             | 8.4              | 1954           | 832                   |
|                       | General       | 1134                | 87      | 21   | 7    | 115   | 10.1%             | 26.8             | 3086           |                       |
|                       | Total Hunters | 1589                | 296     | 112  | 19   | 427   | 26.9%             | 13.0             | 5544           |                       |
|                       | Resident      | 1238                | 219     | 88   | 13   | 320   | 25.8%             | 14.5             | 4637           |                       |
|                       | Nonresident   | 351                 | 77      | 24   | 6    | 107   | 30.5%             | 8.5              | 907            |                       |
| 706 Black Hills       | D/F           | 2453                | 0       | 1620 | 109  | 1729  | 70.5%             | 5.6              | 9651           | 3391                  |
|                       | General       | 8059                | 4082    | 246  | 68   | 4396  | 54.5%             | 7.4              | 32596          |                       |
|                       | Total Hunters | 10081               | 4082    | 1866 | 177  | 6125  | 60.8%             | 6.9              | 42247          |                       |
|                       | Resident      | 4965                | 1789    | 758  | 84   | 2631  | 53.0%             | 9.0              | 23756          |                       |
|                       | Nonresident   | 5116                | 2293    | 1108 | 93   | 3494  | 68.3%             | 5.3              | 18491          |                       |
| 707 Central           | D/F           | 859                 | 0       | 411  | 133  | 544   | 63.3%             | 5.0              | 2747           | 2743                  |
|                       | Limited       | 669                 | 360     | 60   | 11   | 431   | 64.4%             | 7.2              | 3112           | 2078                  |
|                       | General       | 1255                | 233     | 25   | 16   | 274   | 21.8%             | 10.1             | 2773           |                       |
|                       | Total Hunters | 2421                | 593     | 496  | 160  | 1249  | 51.6%             | 6.9              | 8632           |                       |
|                       | Resident      | 1492                | 392     | 326  | 112  | 830   | 55.6%             | 7.7              | 6362           |                       |
|                       | Nonresident   | 929                 | 201     | 170  | 48   | 419   | 45.1%             | 5.4              | 2270           |                       |
| 999 Rest of State     | D/F           | 248                 | 0       | 65   | 31   | 96    | 38.7%             | 8.9              | 855            | 2650                  |
|                       | Limited       | 228                 | 85      | 20   | 2    | 107   | 46.9%             | 12.4             | 1323           | 1797                  |
|                       | General       | 1208                | 120     | 16   | 0    | 136   | 11.3%             | 27.4             | 3729           |                       |
|                       | Total Hunters | 1590                | 205     | 101  | 33   | 339   | 21.3%             | 17.4             | 5907           |                       |
|                       | Resident      | 1432                | 178     | 93   | 26   | 297   | 20.7%             | 17.0             | 5037           |                       |
|                       | Nonresident   | 158                 | 27      | 8    | 7    | 42    | 26.6%             | 20.7             | 870            |                       |

TABLE V  
CONFIDENCE INTERVALS FOR TOTAL DEER HARVEST  
BY HERD UNIT  
2007

| HERD<br>(W = White Tail) |                     | TOTAL HARVEST | 90% CONFIDENCE LIMITS |   |      |
|--------------------------|---------------------|---------------|-----------------------|---|------|
| 101                      | Targhee             | 38            | 29                    | - | 47   |
| 104                      | Sublette            | 2212          | 2150                  | - | 2274 |
| 131                      | Wyoming Range       | 2271          | 2210                  | - | 2332 |
| 201 (W)                  | Bighorn Basin       | 1316          | 1266                  | - | 1366 |
| 207                      | Paintrock           | 947           | 910                   | - | 984  |
| 208                      | Southwest Bighorns  | 1763          | 1716                  | - | 1810 |
| 209                      | Basin               | 212           | 196                   | - | 228  |
| 210                      | Greybull River      | 685           | 659                   | - | 711  |
| 211                      | Shoshone River      | 354           | 330                   | - | 378  |
| 212                      | Owl Creek/Meeteetse | 428           | 408                   | - | 448  |
| 215                      | Upper Shoshone      | 1388          | 1347                  | - | 1429 |
| 216                      | Clark's Fork        | 910           | 877                   | - | 943  |
| 303 (W)                  | Powder River        | 4499          | 4426                  | - | 4572 |
| 319                      | Powder River        | 3710          | 3651                  | - | 3769 |
| 320                      | Pumpkin Buttes      | 847           | 819                   | - | 875  |
| 321                      | North Bighorn       | 2077          | 2020                  | - | 2134 |
| 322                      | Upper Powder River  | 1277          | 1241                  | - | 1313 |
| 423                      | Uinta               | 1018          | 978                   | - | 1058 |
| 424                      | South Rock Springs  | 351           | 337                   | - | 365  |
| 427                      | Baggs               | 2632          | 2583                  | - | 2681 |
| 430                      | Steamboat           | 384           | 358                   | - | 410  |
| 504 (W)                  | Southeast Wyoming   | 427           | 397                   | - | 457  |
| 534                      | Goeshen Rim         | 893           | 858                   | - | 928  |
| 537                      | Laramie Mountains   | 1580          | 1539                  | - | 1621 |
| 539                      | Sheep Mountain      | 530           | 497                   | - | 563  |
| 540                      | Shirley Mountain    | 569           | 544                   | - | 594  |
| 541                      | Platte Valley       | 1817          | 1761                  | - | 1873 |
| 642                      | Dubois              | 728           | 695                   | - | 761  |
| 643                      | Project             | 480           | 460                   | - | 500  |
| 644                      | South Wind River    | 884           | 847                   | - | 921  |
| 646                      | Sweetwater          | 612           | 584                   | - | 640  |
| 647                      | Ferris              | 226           | 215                   | - | 237  |
| 648                      | Beaver Rim          | 64            | 59                    | - | 69   |
| 650                      | Chain Lakes         | 60            | 51                    | - | 69   |
| 706 (W)                  | Black Hills         | 6125          | 6038                  | - | 6212 |
| 707 (W)                  | Central             | 1249          | 1205                  | - | 1293 |
| 751                      | Black Hills         | 3372          | 3300                  | - | 3444 |
| 752                      | Thunder Basin       | 1355          | 1317                  | - | 1393 |
| 753                      | Lance Creek         | 1410          | 1374                  | - | 1446 |
| 755                      | North Converse      | 705           | 686                   | - | 724  |
| 756                      | South Converse      | 729           | 700                   | - | 758  |
| 757                      | Bates Hole-Hat Six  | 658           | 629                   | - | 687  |
| 758                      | Rattlesnake         | 594           | 572                   | - | 616  |
| 759                      | North Natrona       | 336           | 322                   | - | 350  |
| 999 (W)                  | Rest of State       | 339           | 312                   | - | 366  |

TABLE VI  
DEER HUNTERS HUNTING ON OPENING DAY  
BY HUNT AREA AND RESIDENCY  
2007

| AREA | RESIDENT<br>HUNTERS HUNTING<br>ON OPENING DAY | PERCENT WHO<br>HUNTED ON<br>OPENING DAY | NONRESIDENT<br>HUNTERS HUNTING<br>ON OPENING DAY | PERCENT WHO<br>HUNTED ON<br>OPENING DAY |
|------|-----------------------------------------------|-----------------------------------------|--------------------------------------------------|-----------------------------------------|
| 1    | 184                                           | 15.3%                                   | 368                                              | 20.4%                                   |
| 2    | 441                                           | 16.0%                                   | 661                                              | 20.8%                                   |
| 3    | 75                                            | 15.4%                                   | 244                                              | 40.9%                                   |
| 4    | 220                                           | 22.1%                                   | 174                                              | 27.4%                                   |
| 5    | 66                                            | 19.7%                                   | 82                                               | 29.6%                                   |
| 6    | 135                                           | 27.8%                                   | 130                                              | 37.6%                                   |
| 7    | 34                                            | 29.7%                                   | 110                                              | 50.8%                                   |
| 8    | 34                                            | 32.9%                                   | 122                                              | 57.4%                                   |
| 9    | 19                                            | 20.9%                                   | 101                                              | 56.6%                                   |
| 10   | 61                                            | 41.5%                                   | 90                                               | 71.9%                                   |
| 11   | 22                                            | 17.0%                                   | 176                                              | 49.0%                                   |
| 12   | 38                                            | 28.5%                                   | 230                                              | 56.5%                                   |
| 13   | 56                                            | 18.3%                                   | 387                                              | 60.7%                                   |
| 14   | 39                                            | 26.2%                                   | 311                                              | 67.6%                                   |
| 15   | 31                                            | 25.5%                                   | 60                                               | 62.5%                                   |
| 16   | 167                                           | 51.2%                                   | 77                                               | 47.4%                                   |
| 17   | 147                                           | 21.7%                                   | 333                                              | 45.6%                                   |
| 18   | 214                                           | 28.5%                                   | 409                                              | 46.5%                                   |
| 19   | 16                                            | 11.1%                                   | 168                                              | 50.7%                                   |
| 20   | 7                                             | 12.0%                                   | 42                                               | 41.6%                                   |
| 21   | 105                                           | 29.8%                                   | 122                                              | 46.2%                                   |
| 22   | 17                                            | 16.6%                                   | 183                                              | 47.2%                                   |
| 23   | 220                                           | 22.2%                                   | 543                                              | 46.1%                                   |
| 24   | 489                                           | 21.2%                                   | 337                                              | 28.1%                                   |
| 25   | 215                                           | 39.9%                                   | 212                                              | 60.8%                                   |
| 26   | 126                                           | 20.3%                                   | 263                                              | 48.3%                                   |
| 27   | 132                                           | 13.1%                                   | 262                                              | 44.6%                                   |
| 28   | 138                                           | 37.2%                                   | 97                                               | 48.2%                                   |
| 29   | 81                                            | 29.5%                                   | 185                                              | 43.8%                                   |
| 30   | 58                                            | 19.8%                                   | 133                                              | 39.3%                                   |
| 31   | 9                                             | 26.4%                                   | 32                                               | 81.8%                                   |
| 32   | 15                                            | 23.4%                                   | 18                                               | 36.6%                                   |
| 33   | 47                                            | 15.7%                                   | 402                                              | 54.3%                                   |
| 34   | 72                                            | 23.4%                                   | 57                                               | 53.3%                                   |
| 35   | 9                                             | 10.4%                                   | 61                                               | 60.7%                                   |
| 36   | 125                                           | 41.4%                                   | 111                                              | 74.3%                                   |
| 37   | 77                                            | 35.5%                                   | 30                                               | 48.5%                                   |
| 38   | 31                                            | 32.8%                                   | 54                                               | 71.4%                                   |
| 39   | 11                                            | 17.3%                                   | 69                                               | 50.9%                                   |
| 40   | 34                                            | 33.7%                                   | 143                                              | 59.0%                                   |
| 41   | 106                                           | 34.2%                                   | 144                                              | 73.1%                                   |
| 42   | 118                                           | 31.2%                                   | 511                                              | 69.9%                                   |
| 43   | 12                                            | 25.7%                                   | 64                                               | 78.3%                                   |
| 44   | 39                                            | 41.2%                                   | 51                                               | 75.0%                                   |
| 45   | 66                                            | 46.7%                                   | 94                                               | 67.4%                                   |
| 46   | 130                                           | 52.0%                                   | 91                                               | 81.8%                                   |
| 47   | 126                                           | 44.6%                                   | 109                                              | 64.7%                                   |
| 49   | 91                                            | 48.8%                                   | 105                                              | 82.3%                                   |
| 50   | 96                                            | 58.9%                                   | 74                                               | 75.9%                                   |
| 51   | 111                                           | 38.8%                                   | 151                                              | 59.1%                                   |
| 52   | 43                                            | 36.5%                                   | 27                                               | 66.7%                                   |
| 53   | 153                                           | 44.1%                                   | 57                                               | 56.7%                                   |
| 55   | 231                                           | 40.1%                                   | 85                                               | 43.8%                                   |
| 57   | 213                                           | 49.2%                                   | 49                                               | 72.3%                                   |
| 59   | 43                                            | 28.5%                                   | 23                                               | 40.5%                                   |
| 60   | 125                                           | 54.1%                                   | 25                                               | 52.4%                                   |
| 61   | 79                                            | 50.1%                                   | 20                                               | 63.6%                                   |
| 62   | 30                                            | 32.1%                                   | 20                                               | 32.8%                                   |
| 63   | 24                                            | 18.6%                                   | 100                                              | 64.5%                                   |
| 64   | 433                                           | 40.2%                                   | 315                                              | 60.8%                                   |

TABLE VI (Continued)

**DEER** OPENING DAY HUNTERS REPORT

| AREA | RESIDENT<br>HUNTERS HUNTING<br>ON OPENING DAY | PERCENT WHO<br>HUNTED ON<br>OPENING DAY | NONRESIDENT<br>HUNTERS HUNTING<br>ON OPENING DAY | PERCENT WHO<br>HUNTED ON<br>OPENING DAY |
|------|-----------------------------------------------|-----------------------------------------|--------------------------------------------------|-----------------------------------------|
| 65   | 231                                           | 26.9%                                   | 431                                              | 59.3%                                   |
| 66   | 310                                           | 32.0%                                   | 302                                              | 75.3%                                   |
| 70   | 156                                           | 32.2%                                   | 324                                              | 72.3%                                   |
| 73   | 62                                            | 34.9%                                   | 63                                               | 55.0%                                   |
| 74   | 58                                            | 32.7%                                   | 37                                               | 43.0%                                   |
| 75   | 177                                           | 29.5%                                   | 77                                               | 58.2%                                   |
| 76   | 288                                           | 38.5%                                   | 73                                               | 43.5%                                   |
| 77   | 71                                            | 35.5%                                   | 40                                               | 73.3%                                   |
| 78   | 503                                           | 37.0%                                   | 187                                              | 42.3%                                   |
| 79   | 254                                           | 36.0%                                   | 188                                              | 48.6%                                   |
| 80   | 214                                           | 36.5%                                   | 259                                              | 60.1%                                   |
| 81   | 229                                           | 34.6%                                   | 191                                              | 51.6%                                   |
| 82   | 866                                           | 40.5%                                   | 786                                              | 66.4%                                   |
| 83   | 17                                            | 42.3%                                   | 22                                               | 50.0%                                   |
| 84   | 38                                            | 35.4%                                   | 26                                               | 63.0%                                   |
| 87   | 88                                            | 39.7%                                   | 31                                               | 55.0%                                   |
| 88   | 191                                           | 37.6%                                   | 28                                               | 57.5%                                   |
| 89   | 110                                           | 40.5%                                   | 34                                               | 50.7%                                   |
| 90   | 42                                            | 73.1%                                   | 0                                                | 0.0%                                    |
| 91   | 120                                           | 34.9%                                   | 50                                               | 83.3%                                   |
| 92   | 208                                           | 45.3%                                   | 50                                               | 68.5%                                   |
| 93   | 18                                            | 24.4%                                   | 3                                                | 33.3%                                   |
| 94   | 151                                           | 39.9%                                   | 53                                               | 84.0%                                   |
| 95   | 96                                            | 53.2%                                   | 30                                               | 47.4%                                   |
| 96   | 238                                           | 49.5%                                   | 182                                              | 91.6%                                   |
| 97   | 196                                           | 50.7%                                   | 60                                               | 69.4%                                   |
| 98   | 18                                            | 25.2%                                   | 23                                               | 53.8%                                   |
| 100  | 111                                           | 44.4%                                   | 66                                               | 51.3%                                   |
| 101  | 41                                            | 67.9%                                   | 10                                               | 57.1%                                   |
| 102  | 200                                           | 63.5%                                   | 31                                               | 40.0%                                   |
| 105  | 73                                            | 26.0%                                   | 35                                               | 30.3%                                   |
| 106  | 99                                            | 24.1%                                   | 38                                               | 16.7%                                   |
| 109  | 27                                            | 48.4%                                   | 0                                                | 0.0%                                    |
| 110  | 17                                            | 13.6%                                   | 17                                               | 17.2%                                   |
| 111  | 120                                           | 24.0%                                   | 57                                               | 20.1%                                   |
| 112  | 121                                           | 30.9%                                   | 64                                               | 22.2%                                   |
| 113  | 134                                           | 30.8%                                   | 69                                               | 23.3%                                   |
| 114  | 0                                             | 0.0%                                    | 0                                                | 0.0%                                    |
| 115  | 16                                            | 37.0%                                   | 21                                               | 31.6%                                   |
| 116  | 80                                            | 46.9%                                   | 13                                               | 27.0%                                   |
| 117  | 28                                            | 68.2%                                   | 12                                               | 100.0%                                  |
| 118  | 21                                            | 31.4%                                   | 17                                               | 82.5%                                   |
| 119  | 35                                            | 34.9%                                   | 6                                                | 20.6%                                   |
| 120  | 44                                            | 32.3%                                   | 15                                               | 24.9%                                   |
| 121  | 307                                           | 46.3%                                   | 14                                               | 21.1%                                   |
| 122  | 432                                           | 48.2%                                   | 36                                               | 47.1%                                   |
| 123  | 78                                            | 42.1%                                   | 7                                                | 33.3%                                   |
| 124  | 337                                           | 39.5%                                   | 84                                               | 58.0%                                   |
| 125  | 65                                            | 59.9%                                   | 11                                               | 26.9%                                   |
| 127  | 71                                            | 29.4%                                   | 22                                               | 58.1%                                   |
| 128  | 360                                           | 32.6%                                   | 52                                               | 22.8%                                   |
| 130  | 137                                           | 46.6%                                   | 4                                                | 23.4%                                   |
| 131  | 566                                           | 55.3%                                   | 63                                               | 76.0%                                   |
| 132  | 233                                           | 47.1%                                   | 44                                               | 71.4%                                   |
| 133  | 411                                           | 47.2%                                   | 91                                               | 68.9%                                   |
| 134  | 333                                           | 54.4%                                   | 132                                              | 81.8%                                   |
| 135  | 905                                           | 47.0%                                   | 178                                              | 71.3%                                   |
| 138  | 208                                           | 39.9%                                   | 25                                               | 53.8%                                   |
| 139  | 133                                           | 28.2%                                   | 18                                               | 38.5%                                   |
| 140  | 78                                            | 23.0%                                   | 11                                               | 25.0%                                   |

TABLE VI (Continued)

**DEER** OPENING DAY HUNTERS REPORT

| AREA | RESIDENT<br>HUNTERS HUNTING<br>ON OPENING DAY | PERCENT WHO<br>HUNTED ON<br>OPENING DAY | NONRESIDENT<br>HUNTERS HUNTING<br>ON OPENING DAY | PERCENT WHO<br>HUNTED ON<br>OPENING DAY |
|------|-----------------------------------------------|-----------------------------------------|--------------------------------------------------|-----------------------------------------|
| 141  | 33                                            | 51.4%                                   | 6                                                | 36.4%                                   |
| 142  | 247                                           | 42.5%                                   | 81                                               | 51.1%                                   |
| 143  | 332                                           | 38.9%                                   | 37                                               | 50.0%                                   |
| 144  | 400                                           | 51.3%                                   | 197                                              | 55.8%                                   |
| 145  | 438                                           | 55.8%                                   | 112                                              | 66.7%                                   |
| 146  | 74                                            | 33.1%                                   | 14                                               | 50.0%                                   |
| 148  | 23                                            | 10.7%                                   | 3                                                | 10.0%                                   |
| 149  | 37                                            | 28.9%                                   | 35                                               | 55.6%                                   |
| 150  | 14                                            | 28.7%                                   | 18                                               | 100.0%                                  |
| 151  | 147                                           | 33.7%                                   | 64                                               | 56.3%                                   |
| 152  | 295                                           | 38.8%                                   | 180                                              | 56.0%                                   |
| 153  | 89                                            | 41.2%                                   | 81                                               | 53.5%                                   |
| 154  | 219                                           | 49.0%                                   | 78                                               | 45.8%                                   |
| 155  | 92                                            | 33.7%                                   | 21                                               | 66.7%                                   |
| 156  | 139                                           | 34.1%                                   | 35                                               | 38.5%                                   |
| 157  | 175                                           | 39.6%                                   | 57                                               | 75.2%                                   |
| 158  | 60                                            | 29.7%                                   | 119                                              | 41.3%                                   |
| 160  | 112                                           | 39.9%                                   | 57                                               | 85.0%                                   |
| 161  | 28                                            | 39.8%                                   | 4                                                | 25.0%                                   |
| 162  | 23                                            | 65.0%                                   | 6                                                | 40.0%                                   |
| 163  | 13                                            | 25.7%                                   | 172                                              | 78.7%                                   |
| 164  | 115                                           | 38.4%                                   | 82                                               | 63.2%                                   |
| 165  | 77                                            | 46.2%                                   | 28                                               | 51.7%                                   |
| 167  | 32                                            | 36.1%                                   | 144                                              | 86.9%                                   |
| 168  | 397                                           | 45.7%                                   | 111                                              | 65.5%                                   |
| 169  | 35                                            | 62.0%                                   | 100                                              | 68.3%                                   |
| 170  | 20                                            | 36.4%                                   | 0                                                | 0.0%                                    |
| 171  | 74                                            | 31.9%                                   | 7                                                | 33.3%                                   |
| 171  | 53                                            | 34.8%                                   | 7                                                | 40.0%                                   |



TABLE VII  
DEER LICENSE DATA SUMMARY  
2007

| HUNT AREA               | LICENSE TYPE | NUMBER SOLD | NUMBER SURVEYED | NUMBER USABLE SURVEYS<br>(both hunters and nonhunters) | % USABLE RESPONSE |
|-------------------------|--------------|-------------|-----------------|--------------------------------------------------------|-------------------|
| GENERAL                 | RES          | 43200       | 31747           | 11209                                                  | 35.3%             |
| GENERAL                 | NONRES       | 25949       | 12787           | 7554                                                   | 59.1%             |
| 1, 2, 3                 | 6            | 2722        | 259             | 129                                                    | 49.8%             |
| 4                       | 6            | 324         | 149             | 61                                                     | 40.9%             |
| 5                       | 6            | 112         | 117*            | 43                                                     | 36.8%             |
| 6, 9                    | 6            | 233         | 210             | 93                                                     | 44.3%             |
| 8                       | 6            | 96          | 96              | 31                                                     | 32.3%             |
| 10                      | 6            | 32          | 32              | 18                                                     | 56.3%             |
| 11, 12, 13, 15, 15, 167 | 1            | 300         | 216             | 103                                                    | 47.7%             |
| 11                      | 6            | 134         | 123             | 62                                                     | 50.4%             |
| 11, 12, 13, 15, 15, 167 | 7            | 158         | 151             | 64                                                     | 42.4%             |
| 12, 13, 14              | 6            | 500         | 235             | 108                                                    | 46.0%             |
| 15                      | 6            | 18          | 18              | 10                                                     | 55.6%             |
| 16, 55                  | 1            | 125         | 125             | 66                                                     | 52.8%             |
| 16                      | 2            | 28          | 28              | 15                                                     | 53.6%             |
| 17, 18, 19, 20, 21      | 6            | 928         | 247             | 119                                                    | 48.2%             |
| 22                      | 1            | 338         | 154             | 85                                                     | 55.2%             |
| 22, 158                 | 6            | 286         | 217             | 90                                                     | 41.5%             |
| 23, 26                  | 3            | 43          | 42              | 18                                                     | 42.9%             |
| 23, 26                  | 6            | 783         | 247             | 107                                                    | 43.3%             |
| 23, 26                  | 7            | 240         | 227             | 52                                                     | 22.9%             |
| 24, 27                  | 3            | 102         | 99              | 51                                                     | 51.5%             |
| 24                      | 6            | 998         | 165             | 71                                                     | 43.0%             |
| 24                      | 7            | 1142        | 170             | 65                                                     | 38.2%             |
| 27                      | 6            | 200         | 135             | 58                                                     | 43.0%             |
| 27                      | 7            | 519         | 162             | 53                                                     | 32.7%             |
| 29                      | 6            | 259         | 144             | 55                                                     | 38.2%             |
| 29                      | 7            | 30          | 29              | 9                                                      | 31.0%             |
| 30                      | 6            | 219         | 144             | 51                                                     | 35.4%             |
| 32, 33                  | 7            | 42          | 40              | 16                                                     | 40.0%             |
| 33                      | 6            | 199         | 133             | 73                                                     | 54.9%             |
| 34                      | 1            | 351         | 149             | 83                                                     | 55.7%             |
| 34                      | 6            | 151         | 123             | 43                                                     | 35.0%             |
| 36                      | 7            | 12          | 11              | 3                                                      | 27.3%             |
| 37                      | 1            | 179         | 128             | 67                                                     | 52.3%             |
| 37, 127                 | 2            | 25          | 25              | 16                                                     | 64.0%             |
| 37                      | 6            | 148         | 123             | 73                                                     | 59.4%             |
| 37, 127                 | 7            | 35          | 35              | 15                                                     | 42.9%             |
| 39                      | 6            | 50          | 50              | 12                                                     | 24.0%             |
| 40                      | 6            | 121         | 72              | 30                                                     | 41.7%             |
| 41, 44, 45              | 1            | 54          | 54              | 25                                                     | 46.3%             |
| 41, 45                  | 6            | 197         | 197             | 81                                                     | 41.1%             |
| 41, 45                  | 7            | 29          | 29              | 5                                                      | 17.2%             |
| 42                      | 6            | 175         | 128             | 79                                                     | 61.7%             |
| 47, 49                  | 6            | 149         | 149             | 67                                                     | 45.0%             |
| 51                      | 1            | 75          | 75              | 40                                                     | 53.3%             |
| 51                      | 6            | 260         | 139             | 64                                                     | 46.0%             |
| 55                      | 6            | 150         | 123             | 68                                                     | 55.3%             |
| 57                      | 1            | 50          | 50              | 20                                                     | 40.0%             |
| 59, 62, 63, 64          | 1            | 126         | 126             | 55                                                     | 43.7%             |
| 59                      | 6            | 51          | 51              | 24                                                     | 47.1%             |
| 60                      | 1            | 105         | 105             | 49                                                     | 46.7%             |
| 60                      | 2            | 157         | 123             | 62                                                     | 50.4%             |
| 60                      | 6            | 50          | 50              | 22                                                     | 44.0%             |
| 62, 63, 64              | 6            | 177         | 177             | 95                                                     | 53.7%             |
| 64                      | 2            | 149         | 123             | 69                                                     | 56.1%             |
| 65, 66, 88              | 1            | 400         | 227             | 85                                                     | 37.4%             |
| 65                      | 6            | 196         | 133             | 65                                                     | 48.9%             |
| 65, 66, 88              | 7            | 389         | 235             | 96                                                     | 40.9%             |
| 66                      | 6            | 200         | 133             | 73                                                     | 54.9%             |
| 70                      | 1            | 11          | 11              | 4                                                      | 36.4%             |

TABLE VII (Continued)

**DEER** LICENSE DATA SUMMARY

| HUNT AREA      | LICENSE<br>TYPE | NUMBER<br>SOLD | NUMBER<br>SURVEYED | NUMBER<br>USABLE SURVEYS<br>(both hunters and nonhunters) | % USABLE<br>RESPONSE |
|----------------|-----------------|----------------|--------------------|-----------------------------------------------------------|----------------------|
| 70             | 6               | 100            | 99                 | 42                                                        | 42.4%                |
| 74, 75         | 1               | 26             | 26                 | 11                                                        | 42.3%                |
| 74, 75         | 6               | 25             | 25                 | 13                                                        | 52.0%                |
| 78, 79, 80, 81 | 1               | 28             | 28                 | 17                                                        | 60.7%                |
| 78, 79, 80, 81 | 2               | 27             | 27                 | 17                                                        | 63.0%                |
| 78, 79, 80, 81 | 6               | 203            | 200                | 112                                                       | 56.0%                |
| 82             | 1               | 33             | 22                 | 12                                                        | 54.6%                |
| 82             | 6               | 600            | 159                | 87                                                        | 54.7%                |
| 84             | 1               | 150            | 123                | 63                                                        | 51.2%                |
| 84             | 6               | 59             | 59                 | 36                                                        | 61.0%                |
| 87             | 1               | 301            | 144                | 90                                                        | 62.5%                |
| 88             | 6               | 256            | 139                | 58                                                        | 41.7%                |
| 89             | 1               | 278            | 141                | 72                                                        | 51.1%                |
| 89             | 6               | 94             | 94                 | 38                                                        | 40.4%                |
| 90             | 1               | 75             | 74                 | 34                                                        | 46.0%                |
| 92             | 6               | 50             | 50                 | 19                                                        | 38.0%                |
| 94, 160        | 6               | 54             | 49                 | 25                                                        | 51.0%                |
| 96             | 6               | 60             | 59                 | 23                                                        | 39.0%                |
| 97             | 1               | 27             | 27                 | 13                                                        | 48.2%                |
| 97             | 6               | 102            | 102                | 52                                                        | 51.0%                |
| 101            | 1               | 79             | 78                 | 42                                                        | 53.9%                |
| 102            | 1               | 402            | 152                | 85                                                        | 55.9%                |
| 109            | 1               | 50             | 50                 | 22                                                        | 44.0%                |
| 109            | 6               | 25             | 23                 | 8                                                         | 34.8%                |
| 111            | 6               | 76             | 64                 | 23                                                        | 35.9%                |
| 112, 113       | 6               | 252            | 209                | 117                                                       | 56.0%                |
| 116            | 1               | 153            | 123                | 71                                                        | 57.7%                |
| 116            | 2               | 40             | 40                 | 22                                                        | 55.0%                |
| 116            | 6               | 104            | 99                 | 50                                                        | 50.5%                |
| 117            | 1               | 53             | 53                 | 31                                                        | 58.5%                |
| 118            | 1               | 78             | 78                 | 47                                                        | 60.3%                |
| 118            | 6               | 35             | 35                 | 20                                                        | 57.1%                |
| 119            | 1               | 104            | 104                | 67                                                        | 64.4%                |
| 119            | 6               | 50             | 50                 | 27                                                        | 54.0%                |
| 120            | 1               | 128            | 115                | 64                                                        | 55.7%                |
| 120            | 2               | 26             | 26                 | 13                                                        | 50.0%                |
| 120            | 6               | 100            | 100                | 44                                                        | 44.0%                |
| 120            | 7               | 35             | 36*                | 19                                                        | 52.8%                |
| 121, 122       | 1               | 28             | 28                 | 13                                                        | 46.4%                |
| 122            | 6               | 50             | 50                 | 28                                                        | 56.0%                |
| 124            | 1               | 58             | 58                 | 24                                                        | 41.4%                |
| 124            | 6               | 204            | 135                | 65                                                        | 48.2%                |
| 124            | 7               | 125            | 118                | 31                                                        | 26.3%                |
| 125            | 1               | 135            | 118                | 70                                                        | 59.3%                |
| 125            | 6               | 24             | 23                 | 7                                                         | 30.4%                |
| 127            | 6               | 87             | 87                 | 32                                                        | 36.8%                |
| 128            | 1               | 107            | 105                | 63                                                        | 60.0%                |
| 128            | 2               | 50             | 50                 | 30                                                        | 60.0%                |
| 128            | 6               | 100            | 100                | 57                                                        | 57.0%                |
| 128            | 7               | 150            | 123                | 59                                                        | 48.0%                |
| 130            | 1               | 26             | 26                 | 15                                                        | 57.7%                |
| 130            | 6               | 11             | 11                 | 7                                                         | 63.6%                |
| 131            | 2               | 55             | 55                 | 29                                                        | 52.7%                |
| 141, 162       | 1               | 125            | 125                | 73                                                        | 58.4%                |
| 157, 170       | 1               | 255            | 208                | 129                                                       | 62.0%                |
| 157, 170       | 2               | 77             | 77                 | 38                                                        | 49.4%                |
| 157, 170       | 6               | 330            | 220                | 115                                                       | 52.3%                |
| 157            | 7               | 97             | 99*                | 44                                                        | 44.4%                |
| 158            | 1               | 411            | 159                | 90                                                        | 56.6%                |
| 164            | 1               | 27             | 27                 | 12                                                        | 44.4%                |
| 164            | 6               | 75             | 74                 | 31                                                        | 41.9%                |

TABLE VII (Continued)

**DEER** LICENSE DATA SUMMARY

| HUNT AREA | LICENSE<br>TYPE | NUMBER<br>SOLD | NUMBER<br>SURVEYED | NUMBER<br>USABLE SURVEYS<br>(both hunters and nonhunters) | % USABLE<br>RESPONSE |
|-----------|-----------------|----------------|--------------------|-----------------------------------------------------------|----------------------|
| 165       | 1               | 107            | 107                | 59                                                        | 55.1%                |
| 165       | 2               | 54             | 54                 | 32                                                        | 59.3%                |
| 165       | 6               | 167            | 128                | 61                                                        | 47.7%                |
| 171       | 1               | 35             | 35                 | 17                                                        | 48.6%                |
| TOTAL     |                 | 91789          | 57284              | 24866                                                     | 43.4%                |

\* Actual downloads exceed WG&F sales data.

# WYOMING GAME AND FISH COMMISSION

## CHAPTER 6

### DEER HUNTING SEASONS

Section 1. Authority. This regulation is promulgated by authority of W.S. §23-1-302, §23-1-703 and §23-2-104.

Section 2. Hunting Seasons Established. There shall be open seasons during 2007 for the hunting of deer as set forth in this Chapter and in accordance with Chapter 2, General Hunting Regulation.

Section 3. Regular Hunting Seasons.

(a) Hunt areas, season dates and limitations.

| Hunt Area                  | Type | Date of Seasons |         | Limitations                                                                                                                                             |
|----------------------------|------|-----------------|---------|---------------------------------------------------------------------------------------------------------------------------------------------------------|
|                            |      | Opens           | Closes  |                                                                                                                                                         |
| 1, 2, 3                    |      | Nov. 1          | Nov. 30 | General license; antlered deer off private land; any deer on private land                                                                               |
| 1, 2, 3                    | 6    | Nov. 1          | Nov. 30 | Limited quota; 3,000 licenses doe or fawn valid on private land                                                                                         |
| *4, 5, *6                  |      | Nov. 1          | Nov. 20 | General license; antlered deer off private land; any deer on private land except the lands of the State of Wyoming's Ranch A property shall be closed   |
| *4                         | 6    | Nov. 1          | Nov. 30 | Limited quota; 350 licenses doe or fawn valid on private land                                                                                           |
| 5                          | 6    | Nov. 1          | Nov. 30 | Limited quota; 250 licenses doe or fawn                                                                                                                 |
| *6, *9                     | 6    | Nov. 1          | Nov. 30 | Limited quota; 300 licenses doe or fawn valid in that portion of Area 6 and Area 9 east of U.S. Highway 85                                              |
| 7, *8, *9                  |      | Oct. 1          | Oct. 15 | General license; any deer                                                                                                                               |
| *8                         | 6    | Oct. 1          | Oct. 15 | Limited quota; 300 licenses doe or fawn valid in that portion of Area 8 north of Lodgepole Creek                                                        |
| *10                        |      | Oct. 1          | Oct. 5  | General license; antlered deer                                                                                                                          |
|                            | 6    | Oct. 1          | Oct. 15 | Limited quota; 50 licenses doe or fawn valid on private land                                                                                            |
| 11                         |      | Oct. 1          | Oct. 15 | General license; any deer                                                                                                                               |
|                            | 6    | Oct. 1          | Nov. 30 | Limited quota; 150 licenses doe or fawn                                                                                                                 |
| 12,*13,*14                 |      | Oct. 1          | Oct. 15 | General license; any deer                                                                                                                               |
|                            | 6    | Oct. 1          | Oct. 31 | Limited quota; 500 licenses doe or fawn                                                                                                                 |
| 11, 12, *13, *14, *15, 167 | 1    | Oct. 1          | Nov. 30 | Limited quota; 300 licenses any white-tailed deer                                                                                                       |
|                            | 7    | Oct. 1          | Nov. 30 | Limited quota; 300 licenses doe or fawn white-tailed deer                                                                                               |
| *15                        |      | Oct. 1          | Oct. 15 | General license; any deer                                                                                                                               |
|                            | 6    | Oct. 1          | Oct. 15 | Limited quota; 25 licenses doe or fawn                                                                                                                  |
| *16                        |      | Oct. 1          | Oct. 10 | General license; antlered mule deer or any white-tailed deer                                                                                            |
|                            | 2    | Nov. 1          | Nov. 30 | Limited quota; 25 licenses any deer valid in that portion of Area 16 east of U.S. Highway 85 and south of the Tea Kettle Road and Goshen County Road 94 |
| *16, *55                   | 1    | Nov. 1          | Nov. 30 | Limited quota; 125 licenses any white-tailed deer                                                                                                       |
| 17, 18, 19, 20, 21         |      | Oct. 1          | Oct. 20 | General license; antlered deer off private land, any deer on private land                                                                               |

| Hunt Area          | Type | Date of Seasons |         | Limitations                                                                 |
|--------------------|------|-----------------|---------|-----------------------------------------------------------------------------|
|                    |      | Opens           | Closes  |                                                                             |
| 17                 |      | Nov. 1          | Nov. 30 | General license; any white-tailed deer                                      |
| 17, 18, 19, 20, 21 | 6    | Oct. 1          | Oct. 31 | Limited quota; 1,000 licenses doe or fawn valid on private land             |
| *22                | 1    | Oct. 1          | Oct. 14 | Limited quota; 450 licenses any deer, also valid in Area 158                |
| *22, *158          |      | Nov. 1          | Nov. 30 | General license; any white-tailed deer                                      |
|                    | 6    | Oct. 1          | Oct. 14 | Limited quota; 800 licenses doe or fawn                                     |
|                    |      | Nov. 1          | Nov. 30 | Unused Area 22, 158 Type 6 licenses valid for doe or fawn white-tailed deer |
| 23, 26             |      | Oct. 1          | Oct. 14 | General license; antlered deer off private land, any deer on private land   |
|                    |      | Nov. 1          | Nov. 30 | General license; any white-tailed deer                                      |
|                    | 3    | Nov. 1          | Nov. 30 | Limited quota; 50 licenses any white-tailed deer                            |
|                    | 6    | Oct. 1          | Dec. 16 | Limited quota; 1,000 licenses doe or fawn valid on private land             |
|                    | 7    | Oct. 1          | Dec. 16 | Limited quota; 750 licenses doe or fawn white-tailed deer                   |
| 24                 |      | Oct. 15         | Oct. 31 | General license; antlered deer off private land, any deer on private land   |
|                    |      | Nov. 1          | Nov. 30 | General license; any white-tailed deer                                      |
|                    |      | Dec. 1          | Dec. 16 | General license; antlerless white-tailed deer                               |
|                    | 6    | Sept. 1         | Dec. 16 | Limited quota; 1,000 licenses doe or fawn valid on private land             |
|                    | 7    | Sept. 1         | Dec. 16 | Limited quota; 2,000 licenses doe or fawn white-tailed deer                 |
| 24, 27             | 3    | Nov. 1          | Nov. 30 | Limited quota; 100 licenses any white-tailed deer                           |
| 25                 |      | Oct. 15         | Oct. 31 | General license; antlered deer                                              |
| 27                 |      | Oct. 15         | Oct. 31 | General license; any deer                                                   |
|                    |      | Nov. 1          | Nov. 30 | General license; any white-tailed deer                                      |
|                    |      | Dec. 1          | Dec. 16 | General license; antlerless white-tailed deer                               |
|                    | 6    | Oct. 15         | Dec. 16 | Limited quota; 200 licenses doe or fawn                                     |
|                    | 7    | Oct. 15         | Dec. 16 | Limited quota; 700 licenses doe or fawn white-tailed deer                   |
| 28                 |      | Oct. 15         | Oct. 31 | General license; antlered deer                                              |
| 29                 |      | Oct. 1          | Oct. 14 | General license; antlered deer off private land, any deer on private land   |
|                    |      | Nov. 1          | Nov. 15 | General license; any white-tailed deer                                      |
|                    | 6    | Oct. 1          | Nov. 30 | Limited quota; 300 licenses doe or fawn valid on private land               |
|                    | 7    | Oct. 1          | Nov. 30 | Limited quota; 300 licenses doe or fawn white-tailed deer                   |
| *30                |      | Oct. 15         | Oct. 31 | General license; any deer                                                   |
|                    |      | Nov. 1          | Nov. 30 | General license; any white-tailed deer                                      |
|                    | 6    | Oct. 15         | Nov. 30 | Limited quota; 300 licenses doe or fawn valid on private land               |
| 31                 |      | Oct. 1          | Oct. 10 | General license; antlered deer                                              |
| 32, *33            |      | Oct. 15         | Oct. 31 | General license; any deer                                                   |
|                    |      | Nov. 1          | Nov. 15 | General license; any white-tailed deer                                      |
|                    | 7    | Oct. 15         | Nov. 15 | Limited quota; 150 licenses doe or fawn white-tailed deer                   |
| *33                | 6    | Oct. 15         | Nov. 15 | Limited quota; 200 licenses doe or fawn                                     |

| Hunt Area       | Type | Date of Seasons |         | Limitations                                                                                                                                                          |
|-----------------|------|-----------------|---------|----------------------------------------------------------------------------------------------------------------------------------------------------------------------|
|                 |      | Opens           | Closes  |                                                                                                                                                                      |
| *34             | 1    | Oct. 15         | Oct. 31 | Limited quota; 350 licenses antlered deer; any deer valid in that portion of Area 34 east of the Bucknum Road (Natrona County Road 125) in the Casper Creek drainage |
|                 |      | Nov. 1          | Nov. 30 | Unused Area 34 Type 1 licenses valid for any white-tailed deer                                                                                                       |
|                 | 6    | Oct. 15         | Oct. 31 | Limited quota; 150 licenses doe or fawn                                                                                                                              |
| 35              |      | Oct. 15         | Oct. 31 | General license; any deer                                                                                                                                            |
| 36              |      | Oct. 15         | Oct. 22 | General license; antlered mule deer or any white-tailed deer                                                                                                         |
|                 | 7    | Oct. 15         | Oct. 22 | Limited quota; 25 licenses doe or fawn white-tailed deer                                                                                                             |
| *37             | 1    | Oct. 15         | Oct. 31 | Limited quota; 175 licenses any deer                                                                                                                                 |
|                 | 6    | Sept. 15        | Nov. 15 | Limited quota; 150 licenses doe or fawn                                                                                                                              |
| *37, *127       | 2    | Nov. 1          | Nov. 30 | Limited quota; 25 licenses any white-tailed deer                                                                                                                     |
|                 | 7    | Nov. 1          | Nov. 30 | Limited quota; 35 licenses doe or fawn white-tailed deer                                                                                                             |
| 38, 39          |      | Oct. 15         | Oct. 31 | General license; antlered deer                                                                                                                                       |
| 39              | 6    | Oct. 15         | Oct. 31 | Limited quota; 50 licenses doe or fawn valid in that portion of Area 39 within one (1) mile of the Upper Nowood Road                                                 |
| 40              |      | Oct. 15         | Nov. 4  | General license; any deer                                                                                                                                            |
|                 | 6    | Oct. 15         | Nov. 4  | Limited quota; 125 licenses doe or fawn                                                                                                                              |
| *41, 45, 47, 49 |      | Oct. 15         | Oct. 24 | General license; any deer                                                                                                                                            |
|                 |      | Oct. 25         | Oct. 31 | General license; antlerless deer on private land                                                                                                                     |
| *41, 44, 45     | 1    | Nov. 1          | Nov. 30 | Limited quota; 50 licenses any white-tailed deer                                                                                                                     |
| *41, 45         | 6    | Oct. 1          | Nov. 30 | Limited quota; 200 licenses doe or fawn valid on private land                                                                                                        |
| *41, 45         | 7    | Oct. 1          | Nov. 30 | Limited quota; 50 licenses doe or fawn white-tailed deer                                                                                                             |
| 42              |      | Oct. 15         | Nov. 4  | General license; any deer                                                                                                                                            |
|                 | 6    | Oct. 15         | Nov. 4  | Limited quota; 175 licenses doe or fawn                                                                                                                              |
| 43              |      | Oct. 15         | Oct. 31 | General license; antlered deer                                                                                                                                       |
| 44, 46          |      | Oct. 15         | Oct. 24 | General license; any deer                                                                                                                                            |
| 47, 49          | 6    | Oct. 1          | Nov. 30 | Limited quota; 150 licenses doe or fawn valid on private land                                                                                                        |
| 50, 52          |      | Oct. 15         | Oct. 24 | General license; any deer                                                                                                                                            |
| 51              |      | Oct. 15         | Oct. 24 | General license; any deer                                                                                                                                            |
|                 |      | Oct. 25         | Oct. 31 | General license; antlerless deer on private land                                                                                                                     |
|                 | 1    | Oct. 15         | Nov. 30 | Limited quota; 75 licenses any white-tailed deer; also valid in Hunt Areas 47 and 49                                                                                 |
|                 | 6    | Oct. 1          | Nov. 30 | Limited quota; 250 licenses doe or fawn valid on private land                                                                                                        |
| 53              |      | Oct. 15         | Oct. 24 | General license; any deer                                                                                                                                            |
|                 |      | Oct. 25         | Nov. 4  | General license; antlered deer                                                                                                                                       |
| *55             |      | Oct. 1          | Oct. 14 | General license; antlered mule deer or any white-tailed deer                                                                                                         |
|                 | 6    | Oct. 1          | Oct. 14 | Limited quota; 150 licenses doe or fawn                                                                                                                              |
|                 |      | Nov. 1          | Nov. 30 | Unused Area 55 Type 6 licenses valid in that portion of Area 55 in Goshen County and north of the Laramie River in Platte County                                     |
| *57             |      | Oct. 1          | Oct. 14 | General license; any deer                                                                                                                                            |
|                 | 1    | Nov. 1          | Nov. 30 | Limited quota; 50 licenses any white-tailed deer                                                                                                                     |
| *59,*62,*63     |      | Oct. 15         | Oct. 31 | General license; antlered deer, except the Wyoming Game                                                                                                              |

| Hunt Area          | Type | Date of Seasons |         | Limitations                                                                                                                                                                                                                                                                                                                                                                                                              |
|--------------------|------|-----------------|---------|--------------------------------------------------------------------------------------------------------------------------------------------------------------------------------------------------------------------------------------------------------------------------------------------------------------------------------------------------------------------------------------------------------------------------|
|                    |      | Opens           | Closes  |                                                                                                                                                                                                                                                                                                                                                                                                                          |
|                    |      |                 |         | and Fish Commission's Tom Thorne/Beth Williams Wildlife Research Center at Sybille shall be closed                                                                                                                                                                                                                                                                                                                       |
| *59, *62, *63, *64 | 1    | Nov. 1          | Nov. 30 | Limited quota; 125 licenses any white-tailed deer, also valid in Area 60, except the Wyoming Game and Fish Commission's Tom Thorne/Beth Williams Wildlife Research Center at Sybille south of Wyoming Highway 34 shall be closed                                                                                                                                                                                         |
|                    |      | Dec. 1          | Dec. 15 | Unused Area 59, 62, 63, 64 Type 1 licenses valid for doe or fawn white-tailed deer in Area 64, also valid in Area 60                                                                                                                                                                                                                                                                                                     |
| *59                | 6    | Oct. 15         | Nov. 30 | Limited quota; 50 licenses doe or fawn                                                                                                                                                                                                                                                                                                                                                                                   |
| *60                | 1    | Oct. 20         | Nov. 4  | Limited quota; 100 licenses antlered deer on national forest, any deer off national forest; all lands within Curt Gowdy State Park, archery only                                                                                                                                                                                                                                                                         |
|                    | 2    | Oct. 20         | Nov. 4  | Limited quota; 150 licenses any deer off national forest; all lands within Curt Gowdy State Park, archery only                                                                                                                                                                                                                                                                                                           |
|                    |      | Nov. 15         | Nov. 30 | Unused Area 60 Type 1 and Type 2 licenses valid for doe or fawn white-tailed deer off national forest; all lands within Curt Gowdy State Park, archery only                                                                                                                                                                                                                                                              |
|                    | 6    | Oct. 20         | Nov. 4  | Limited quota; 50 licenses doe or fawn valid in that portion of Area 60 in Laramie County                                                                                                                                                                                                                                                                                                                                |
| *61                |      | Oct. 1          | Oct. 14 | General license; any deer                                                                                                                                                                                                                                                                                                                                                                                                |
| *62, *63, *64      | 6    | Oct. 15         | Oct. 31 | Limited quota; 200 licenses doe or fawn, except the Wyoming Game and Fish Commission's Tom Thorne/Beth Williams Wildlife Habitat Management Area and the Laramie Peak Wildlife Habitat Management Area north of the Tunnel Road (Albany County Road 727), archery only. The Wyoming Game and Fish Commission's Tom Thorne/Beth Williams Wildlife Research Center at Sybille south of Wyoming Highway 34 shall be closed. |
| *64                |      | Oct. 15         | Oct. 31 | General license; antlered deer, except the Wyoming Game and Fish Commission's Tom Thorne/Beth Williams Wildlife Habitat Management Area and the Laramie Peak Wildlife Habitat Management Area north of the Tunnel Road (Albany County Road 727), archery only                                                                                                                                                            |
|                    | 2    | Oct. 15         | Oct. 31 | Limited quota; 150 licenses antlered deer                                                                                                                                                                                                                                                                                                                                                                                |
| *65                |      | Oct. 15         | Oct. 25 | General license; antlered deer                                                                                                                                                                                                                                                                                                                                                                                           |
|                    | 6    | Oct. 15         | Oct. 25 | Limited quota; 200 licenses doe or fawn valid on private land                                                                                                                                                                                                                                                                                                                                                            |
| *65, *66, *88      | 1    | Nov. 1          | Nov. 30 | Limited quota; 400 licenses any white-tailed deer                                                                                                                                                                                                                                                                                                                                                                        |
|                    | 7    | Nov. 1          | Nov. 30 | Limited quota; 500 licenses doe or fawn white-tailed deer                                                                                                                                                                                                                                                                                                                                                                |
| *66                |      | Oct. 15         | Oct. 25 | General license; antlered deer                                                                                                                                                                                                                                                                                                                                                                                           |
|                    | 6    | Oct. 15         | Oct. 25 | Limited quota; 200 licenses doe or fawn                                                                                                                                                                                                                                                                                                                                                                                  |
| *67                |      |                 |         | CLOSED                                                                                                                                                                                                                                                                                                                                                                                                                   |
| *70                |      | Oct. 15         | Oct. 25 | General license; antlered mule deer or any white-tailed deer                                                                                                                                                                                                                                                                                                                                                             |
|                    | 1    | Nov. 1          | Nov. 30 | Limited quota; 25 licenses any white-tailed deer                                                                                                                                                                                                                                                                                                                                                                         |
|                    | 6    | Oct. 15         | Nov. 30 | Limited quota; 100 licenses doe or fawn valid in that portion of Area 70 north of the Lost Creek-Medicine Bow River hydrographic divide and west of Carbon County Road 291; or north of Carbon County Road 102 and west of Carbon County Road 103                                                                                                                                                                        |

| Hunt Area                  | Type | Date of Seasons |         | Limitations                                                                                                             |
|----------------------------|------|-----------------|---------|-------------------------------------------------------------------------------------------------------------------------|
|                            |      | Opens           | Closes  |                                                                                                                         |
| *73                        |      | Oct. 15         | Oct. 31 | General license; antlered deer                                                                                          |
| *74,*75,*76,*77            |      | Oct. 1          | Oct. 14 | General license; antlered mule deer or any white-tailed deer                                                            |
| *74, *75                   | 1    | Nov. 1          | Nov. 30 | Limited quota; 25 licenses any white-tailed deer valid in all of Area 74 and that portion of Area 75 west of Rock Creek |
|                            | 6    | Nov. 1          | Nov. 30 | Limited quota; 25 licenses doe or fawn valid in all of Area 74 and that portion of Area 75 west of Rock Creek           |
| *78, *79, *80, *81         |      | Oct. 1          | Oct. 12 | General license; any deer                                                                                               |
|                            |      | Oct. 13         | Oct. 14 | General license; antlered deer                                                                                          |
|                            | 1    | Nov. 1          | Nov. 30 | Limited quota; 25 licenses any white-tailed deer                                                                        |
|                            | 2    | Oct. 15         | Oct. 31 | Limited quota; 25 licenses any deer                                                                                     |
| *78, *79, *80, *81         | 6    | Oct. 1          | Oct. 12 | Limited quota; 200 licenses doe or fawn                                                                                 |
| *82                        |      | Oct. 1          | Oct. 14 | General license; any deer                                                                                               |
|                            | 1    | Oct. 15         | Oct. 31 | Limited quota; 20 licenses any deer                                                                                     |
|                            | 6    | Oct. 1          | Oct. 14 | Limited quota; 600 licenses doe or fawn                                                                                 |
| 83                         |      | Oct. 1          | Oct. 14 | General license; antlered mule deer or any white-tailed deer                                                            |
| 84                         | 1    | Oct. 1          | Oct. 14 | Limited quota; 150 licenses any deer; also valid in Area 82                                                             |
|                            | 6    | Oct. 1          | Oct. 14 | Limited quota; 50 licenses doe or fawn; also valid in Area 82                                                           |
| 87                         | 1    | Oct. 15         | Oct. 31 | Limited quota; 300 licenses antlered deer                                                                               |
| *88                        |      | Oct. 15         | Oct. 25 | General license; antlered deer                                                                                          |
|                            | 6    | Oct. 15         | Nov. 30 | Limited quota; 250 licenses doe or fawn                                                                                 |
| *89                        | 1    | Oct. 15         | Oct. 31 | Limited quota; 275 licenses antlered deer                                                                               |
|                            | 6    | Oct. 15         | Oct. 31 | Limited quota; 100 licenses doe or fawn                                                                                 |
| 90                         | 1    | Oct. 15         | Oct. 31 | Limited quota; 75 licenses any deer                                                                                     |
| 91, 92, 93, 94, 95, 96, 97 |      | Oct. 15         | Oct. 22 | General license; antlered mule deer or any white-tailed deer                                                            |
| 92                         | 6    | Oct. 15         | Oct. 22 | Limited quota; 50 license doe or fawn                                                                                   |
| 94, 160                    | 6    | Oct. 15         | Oct. 22 | Limited quota; 50 licenses doe or fawn                                                                                  |
| 96                         | 6    | Oct. 15         | Oct. 22 | Limited quota; 75 licenses doe or fawn                                                                                  |
| 97                         | 1    | Nov. 1          | Nov. 30 | Limited quota; 25 licenses any white-tailed deer                                                                        |
|                            | 6    | Nov. 1          | Nov. 30 | Limited quota; 100 licenses doe or fawn                                                                                 |
| 98                         |      | Oct. 15         | Oct. 22 | General license; any deer, archery or muzzle-loading firearms only                                                      |
| 100                        |      | Oct. 1          | Oct. 8  | General license; antlered deer                                                                                          |
| 101                        | 1    | Oct. 15         | Oct. 31 | Limited quota; 75 licenses antlered deer                                                                                |
| 102                        | 1    | Oct. 15         | Oct. 31 | Limited quota; 400 licenses antlered deer                                                                               |
| 105                        |      | Oct. 15         | Oct. 31 | General license; antlered deer on national forest                                                                       |
|                            |      | Nov. 1          | Nov. 5  | General license; antlered deer                                                                                          |
|                            |      | Nov. 1          | Nov. 10 | General license; antlerless deer off national forest                                                                    |
| 106                        |      | Oct. 15         | Nov. 5  | General license; antlered deer                                                                                          |
| 109                        | 1    | Nov. 1          | Nov. 15 | Limited quota; 50 licenses antlered deer                                                                                |
|                            | 6    | Nov. 15         | Nov. 30 | Limited quota; 25 licenses doe or fawn white-tailed deer                                                                |



| Hunt Area     | Type | Date of Seasons |         | Limitations                                                                                                                            |
|---------------|------|-----------------|---------|----------------------------------------------------------------------------------------------------------------------------------------|
|               |      | Opens           | Closes  |                                                                                                                                        |
| 110           |      | Oct. 15         | Nov. 10 | General license; antlered deer                                                                                                         |
| 111, 112, 113 |      | Oct. 15         | Nov. 10 | General license; antlered deer on national forest                                                                                      |
|               |      | Nov. 1          | Nov. 10 | General license; any deer off national forest                                                                                          |
| 111           | 6    | Oct. 15         | Nov. 10 | Limited quota; 150 licenses doe or fawn off national forest                                                                            |
| 112, 113      | 6    | Oct. 15         | Nov. 10 | Limited quota; 250 licenses doe or fawn off national forest                                                                            |
| 114           |      | Oct. 15         | Nov. 10 | General license; antlered deer                                                                                                         |
| 115           |      | Sept. 10        | Oct. 21 | General license; antlered deer                                                                                                         |
| 116           | 1    | Oct. 15         | Oct. 31 | Limited quota; 150 licenses any deer                                                                                                   |
|               | 2    | Oct. 15         | Nov. 7  | Limited quota; 40 licenses any white-tailed deer; also valid in Area 118                                                               |
|               |      | Nov. 8          | Nov. 15 | Unused Area 116 Type 2 licenses valid for antlerless white-tailed deer; also valid in Area 118                                         |
|               | 6    | Oct. 15         | Nov. 15 | Limited quota; 100 licenses doe or fawn valid on private land                                                                          |
| 117           | 1    | Oct. 1          | Oct. 15 | Limited quota; 50 licenses antlered deer                                                                                               |
| 118           | 1    | Oct. 15         | Oct. 31 | Limited quota; 75 licenses any deer                                                                                                    |
|               | 6    | Oct. 15         | Oct. 31 | Limited quota; 35 licenses doe or fawn                                                                                                 |
| 119           | 1    | Nov. 1          | Nov. 15 | Limited quota; 100 licenses any deer                                                                                                   |
|               | 6    | Sept. 15        | Nov. 15 | Limited quota; 50 licenses doe or fawn                                                                                                 |
| *120          | 1    | Nov. 1          | Nov. 15 | Limited quota; 125 licenses any deer                                                                                                   |
|               | 2    | Nov. 15         | Nov. 30 | Limited quota; 25 licenses any white-tailed deer; also valid in Area 119                                                               |
|               | 6    | Sept. 15        | Nov. 15 | Limited quota; 100 licenses doe or fawn valid on private land                                                                          |
|               | 7    | Nov. 1          | Nov. 30 | Limited quota; 35 licenses doe or fawn white-tailed deer                                                                               |
| 121, 122      | 1    | Nov. 1          | Nov. 30 | Limited quota; 25 licenses any white-tailed deer                                                                                       |
| 121           |      | Nov. 1          | Nov. 7  | General license; antlered deer in that portion of Area 121 west of the Heart Mountain Canal and west of Wyoming Highway 294            |
|               |      | Nov. 1          | Nov. 11 | General license; any deer in that portion of Area 121 east of Heart Mountain Canal and east of Wyoming Highway 294                     |
|               |      | Nov. 12         | Nov. 18 | General license; antlerless white-tailed deer in that portion of Area 121 east of Heart Mountain Canal and east of Wyoming Highway 294 |
| 122           |      | Nov. 1          | Nov. 11 | General license; antlered deer off private land; any deer on private land                                                              |
|               |      | Nov. 12         | Nov. 18 | General license; antlerless white-tailed deer                                                                                          |
|               | 6    | Nov. 1          | Nov. 30 | Limited quota; 50 licenses doe or fawn white-tailed deer                                                                               |
| 123           |      | Oct. 15         | Nov. 2  | General license; any deer                                                                                                              |
| 124           |      | Nov. 1          | Nov. 7  | General license; antlered deer off private land, any deer on private land                                                              |
|               |      | Nov. 8          | Nov. 15 | General license; antlerless deer on private land                                                                                       |
|               | 1    | Nov. 1          | Nov. 30 | Limited quota; 50 licenses any white-tailed deer                                                                                       |
|               | 6    | Oct. 1          | Nov. 30 | Limited quota; 200 licenses doe or fawn valid on private land                                                                          |
|               | 7    | Sept. 15        | Nov. 30 | Limited quota; 150 licenses doe or fawn valid on private land in that portion of Area 124 in Park County                               |

| Hunt Area                         | Type | Date of Seasons |          | Limitations                                                                                                                                                                                    |
|-----------------------------------|------|-----------------|----------|------------------------------------------------------------------------------------------------------------------------------------------------------------------------------------------------|
|                                   |      | Opens           | Closes   |                                                                                                                                                                                                |
| 125                               | 1    | Nov. 1          | Nov. 15  | Limited quota; 125 licenses any deer                                                                                                                                                           |
|                                   | 6    | Sept. 1         | Sept. 30 | Limited quota; 25 licenses doe or fawn valid on private land in that portion of Area 125 in Washakie County                                                                                    |
| *127                              |      | Oct. 15         | Oct. 31  | General license; antlered deer off private land, any deer on private land                                                                                                                      |
|                                   | 6    | Sept. 15        | Nov. 15  | Limited quota; 125 licenses doe or fawn valid on private land                                                                                                                                  |
| 128                               |      | Oct. 1          | Oct. 22  | General license; antlered deer                                                                                                                                                                 |
|                                   | 1    | Nov. 1          | Nov. 20  | Limited quota; 100 licenses any deer                                                                                                                                                           |
|                                   | 2    | Nov. 1          | Nov. 20  | Limited quota; 50 licenses any white-tailed deer                                                                                                                                               |
|                                   | 6    | Nov. 1          | Nov. 20  | Limited quota; 100 licenses doe or fawn                                                                                                                                                        |
|                                   | 7    | Nov. 1          | Nov. 20  | Limited quota; 150 licenses doe or fawn valid in Area 128, excluding the Wiggins Fork River, East Fork River and Torrey Creek drainages                                                        |
| 130                               |      | Oct. 1          | Oct. 8   | General license; antlered deer                                                                                                                                                                 |
|                                   | 1    | Oct. 15         | Oct. 31  | Limited quota; 25 licenses antlered deer                                                                                                                                                       |
|                                   | 6    | Nov. 1          | Dec. 15  | Limited quota; 10 licenses doe or fawn valid in that portion of Area 130 within Sweetwater County                                                                                              |
| 131                               |      | Oct. 1          | Oct. 8   | General license; antlered deer                                                                                                                                                                 |
|                                   | 2    | Nov. 1          | Nov. 11  | Limited quota; 50 licenses antlerless deer valid in that portion of Area 131 west of the Lower Farson Cut Off Road (Sweetwater County Road 8) and the Blue Rim Road (Sweetwater County Road 5) |
| 132                               |      | Oct. 1          | Oct. 10  | General license; antlered deer 4 points or more on either antler                                                                                                                               |
| 133, 134, 135                     |      | Oct. 1          | Oct. 10  | General license; antlered deer                                                                                                                                                                 |
| 138, 139, 140                     |      | Sept. 15        | Sept. 30 | General license; antlered deer                                                                                                                                                                 |
|                                   |      | Oct. 1          | Oct. 8   | General license; any deer                                                                                                                                                                      |
|                                   |      | Oct. 9          | Nov. 15  | General license; any white-tailed deer                                                                                                                                                         |
| 141, 162                          | 1    | Oct. 15         | Oct. 31  | Limited quota; 125 licenses any deer                                                                                                                                                           |
| 142, 143, 144, 153                |      | Sept. 15        | Oct. 5   | General license; antlered deer                                                                                                                                                                 |
| 145                               |      | Sept. 15        | Sept. 30 | General license; antlered deer                                                                                                                                                                 |
| 146, 149, 151, 152, 154, 155, 156 |      | Sept. 15        | Sept. 30 | General license; any deer                                                                                                                                                                      |
|                                   |      | Oct. 1          | Oct. 10  | General license; antlered deer                                                                                                                                                                 |
| 148                               |      | Sept. 15        | Oct. 25  | General license; antlered deer                                                                                                                                                                 |
| 150                               |      | Sept. 15        | Oct. 10  | General license; any deer valid in that portion of Area 150 west of Wyoming Highway 390                                                                                                        |
|                                   |      | Oct. 1          | Oct. 10  | General license; archery only, any deer valid in that portion of Area 150 east of Wyoming Highway 390                                                                                          |
| 157, 170                          | 1    | Oct. 15         | Oct. 31  | Limited quota; 250 licenses any deer                                                                                                                                                           |
|                                   | 2    | Nov. 1          | Nov. 30  | Limited quota; 75 licenses any white-tailed deer                                                                                                                                               |
|                                   | 6    | Oct. 15         | Oct. 19  | Limited quota; 325 licenses doe or fawn                                                                                                                                                        |
|                                   |      | Oct. 20         | Oct. 31  | Unused Areas 157, 170 Type 6 licenses valid on private land                                                                                                                                    |
|                                   | 7    | Oct. 15         | Nov. 30  | Limited quota; 100 licenses doe or fawn white-tailed deer                                                                                                                                      |

| Hunt Area | Type | Date of Seasons |         | Limitations                                                            |
|-----------|------|-----------------|---------|------------------------------------------------------------------------|
|           |      | Opens           | Closes  |                                                                        |
| *158      | 1    | Oct. 1          | Oct. 14 | Limited quota; 600 licenses any deer, also valid in Area 22            |
| 160       |      | Oct. 15         | Oct. 22 | General license; antlered mule deer or any white-tailed deer           |
| 161       |      | Oct. 15         | Oct. 25 | General license; antlered mule deer or any white-tailed deer           |
| 163       |      | Oct. 15         | Oct. 21 | General license; antlered mule deer or any white-tailed deer           |
|           |      | Nov. 1          | Nov. 15 | General license; any white-tailed deer                                 |
| *164      |      | Oct. 1          | Oct. 10 | General license; any deer                                              |
|           | 1    | Nov. 1          | Nov. 30 | Limited quota; 25 licenses any white-tailed deer                       |
|           | 6    | Oct. 1          | Nov. 30 | Limited quota; 75 licenses doe or fawn valid on private land           |
| 165       | 1    | Oct. 15         | Oct. 31 | Limited quota; 100 licenses any deer                                   |
|           | 2    | Oct. 15         | Nov. 7  | Limited quota; 50 licenses any white-tailed deer                       |
|           |      | Nov. 8          | Nov. 15 | Unused Area 165 Type 2 licenses valid for antlerless white-tailed deer |
|           | 6    | Oct. 15         | Nov. 15 | Limited quota; 175 licenses doe or fawn valid on private land          |
| 167       |      | Oct. 1          | Oct. 5  | General license; antlered deer                                         |
| 168       |      | Oct. 1          | Oct. 10 | General license; antlered deer                                         |
| 169       |      | Oct. 15         | Oct. 21 | General license; antlered mule deer or any white-tailed deer           |
|           |      | Nov. 1          | Nov. 15 | General license; any white-tailed deer                                 |
| 171       |      | Oct. 15         | Oct. 31 | General license; any deer                                              |
|           | 1    | Nov. 1          | Nov. 20 | Limited quota; 35 licenses any white-tailed deer                       |

\*ASTERISK DENOTES A CWD HUNT AREA. PLEASE SEE IMPORTANT INFORMATION SECTION OF THE DEER REGULATION BROCHURE REGARDING CHRONIC WASTING DISEASE.

Section 4. Special Archery Seasons. Hunt Areas listed in this section shall have special archery hunting seasons during the dates specified in this section. Archers shall possess a general deer license or a limited quota deer license in addition to an archery license in order to hunt deer during any special archery season.

Archers with general deer licenses shall only hunt in those Hunt Areas specified in Section 3 as open to hunting with a general license and may take any deer.

Archers with limited quota deer licenses shall only hunt in the hunt area(s) and for the sex and species of deer set forth by the limitations of their license as specified in Section 3 of this Chapter.

Archers who possess resident general deer licenses or nonresident region B general deer licenses may archery hunt any deer during the special archery season in limited quota Hunt Areas 22 and 158. Archers who possess resident general deer licenses or nonresident region E licenses may archery hunt any deer during the special archery season in limited quota Hunt Area 34.

| Hunt Area                                                                                                                                                                                 | Date of Seasons |          |
|-------------------------------------------------------------------------------------------------------------------------------------------------------------------------------------------|-----------------|----------|
|                                                                                                                                                                                           | Opens           | Closes   |
| 1-47, 49-53, 55, 57, 59-66, 70, 73-84, 87-98, 100-102, 105, 106, 109-114, 116-120, 124, 125, 127, 128, 130-135, 141, 157, 158, 160-165, 167-171. Curt Gowdy State Park in Area 60 closed. | Sept. 1         | Sept. 30 |
| 138-140, 142-146, 148-156                                                                                                                                                                 | Sept. 1         | Sept. 14 |
| 115                                                                                                                                                                                       | Sept. 1         | Sept. 9  |
| 121, 122, 123                                                                                                                                                                             | Sept. 15        | Oct. 14  |

#### Section 5. Nonresident Region General Deer License Quotas.

Nonresident region general deer licenses shall only be valid within the specific region for which they are issued and for only those Hunt Areas in the Region as listed in this section.

Quotas of nonresident region general deer licenses are established for the regions and shall not exceed the numbers specified in this section.

| Region | Deer Hunt Areas                 | Quotas |
|--------|---------------------------------|--------|
| A      | 1-6                             | 5,000  |
| B      | 7-14, 21, 167                   | 2,300  |
| C      | 17-20, 23-33, 163, 169          | 6,000  |
| D      | 66, 70, 74-81, 83, 161          | 2,500  |
| E      | 88, 91-98, 128, 148, 160, 171   | 800    |
| F      | 105, 106, 110-115, 121-124, 127 | 1,450  |
| G      | 135, 143-145                    | 800    |
| H      | 130, 138-140, 142, 146, 149-156 | 1,200  |
| J      | 59, 61-65, 73                   | 1,800  |
| K      | 132-134, 168                    | 500    |
| M      | 35, 36, 38-40, 42, 43, 164      | 1,500  |
| R      | 41, 44-47, 49-53                | 1,000  |
| T      | 15, 16, 55, 57                  | 500    |
| W      | 82, 100, 131                    | 1,200  |

#### Section 6. Hunt Area Descriptions.

##### (a) Area and Number.

Area 1. Crook. Beginning where Wyoming Highway 112 crosses the Wyoming-Montana state line; southwesterly along said highway to Wyoming Highway 24 in the town of Hulett; southerly along said highway to U.S. Highway 14; westerly along said highway to the Cabin Creek Road; northwesterly along said road to Oshoto and the Oshoto Road connection; westerly along said road to the "D" Road; northerly along said road to the Rocky Point Road; northerly along said road to the Wyoming-Montana state line.

Area 2. Bearlodge. Beginning where Wyoming Highway 112 crosses the Wyoming-Montana state line; easterly along said line to the Wyoming-South Dakota state line; southerly along said line to Interstate Highway 90; southwesterly along said highway to the town of Sundance and the interchange with U.S. Highway 14; westerly and northerly along said highway to Wyoming Highway 24; northerly along said highway to Wyoming Highway 112 at the town of Hulett; northeasterly along said highway to the Wyoming-Montana state line.

Area 3. Keyhole. Beginning at the intersection of Interstate Highway 90 and U.S. Highway 14 in the town of Sundance; southerly and westerly along Interstate Highway 90 to its intersection with the "D" Road; northerly along said road to the Oshoto Road Connection; easterly along said road to Oshoto and the Cabin Creek Road; southerly and easterly along the Cabin Creek Road to U.S. Highway 14; easterly and southerly along said highway to Interstate Highway 90 in the town of Sundance.

Area 4. Sand Creek. Beginning where Interstate Highway 90 intersects the Wyoming-South Dakota state line; southerly along said line to U.S. Highway 85; southerly along said highway to Wyoming Highway 585 at Four Corners; northerly and westerly along said highway to the town of Sundance and Interstate Highway 90; northerly and easterly along said highway to the Wyoming-South Dakota state line.

Area 5. Inyan Kara. Beginning where Interstate Highway 90 intersects Wyoming Highway 585 in the town of Sundance; southeasterly along Wyoming Highway 585 to the Skull Creek Road; westerly along said road to the Green Mountain Road; northerly along said road to the Dry Creek Road; westerly and northerly along said road

to Wyoming Highway 116; westerly and southerly along said highway to U.S. Highway 16 in the town of Upton; northwesterly along said highway to Interstate Highway 90 at the town of Moorcroft; easterly and northerly along said highway to Wyoming Highway 585 at the town of Sundance.

Area 6. Skull Creek. Beginning where U.S. Highway 85 intersects the Wyoming-South Dakota state line; southerly along said line to U.S. Highway 16; northwesterly along said highway to Wyoming Highway 116 in the town of Upton; northerly and easterly along said highway to the Dry Creek Road; southerly and easterly along said road to the Green Mountain Road; southerly along said road to the Skull Creek Road; easterly along said road to Wyoming Highway 585; southerly and easterly along said highway to U.S. Highway 85; northerly along said highway to the Wyoming-South Dakota state line.

Area 7. South Osage. Beginning at the junction of U.S. Highway 16 and Wyoming Highway 450; southwestly along Wyoming Highway 450 to Wyoming Highway 116; northerly along said highway to U.S. Highway 16 in the town of Upton; southeasterly along said highway to Wyoming Highway 450.

Area 8. Upton-Four Horse. Beginning at the junction of Wyoming Highway 116 and Wyoming Highway 450; westerly along Wyoming Highway 450 to the Keeline Road (U.S.F.S. Road 930); northwesterly along said road to Black Thunder Creek; easterly down said creek to Bacon Creek; northerly up said creek to Newel Prong; northerly up said prong to the Cheyenne River/Belle Fourche River Divide; northeasterly along said divide to the divide between Four Horse Creek and Raven Creek; northwesterly along said divide to the Belle Fourche River; northeasterly down said river to U.S. Highway 16; southeasterly along said highway to Wyoming Highway 116 at the town of Upton; southerly along said highway to Wyoming Highway 450.

Area 9. Blacktail Creek. Beginning where U.S. Highway 16 crosses the Wyoming-South Dakota state line; southerly along said line to the Dewey Road; northwesterly along said road to U.S. Highway 85; southerly along said highway to the Cheyenne River Road N. (Weston County); westerly along said road to the Lynch Road; northerly along said road to Wyoming Highway 450; northeasterly along said highway to U.S. Highway 16; southeasterly along said highway to the Wyoming-South Dakota state line.

Area 10. Teckla. Beginning at the junction of Wyoming Highway 450 and Wyoming Highway 59; easterly along Wyoming Highway 450 to the Lynch Road; southerly along said road to the Campbell-Converse county line and the Clareton Road (Converse County Road 39); southwestly along said road to the Dull Center Road (Converse County Road 38); westerly along said road to the Rochelle Hills Road (U.S.F.S. Road 933); northerly and westerly along said road to the North Antelope Road (U.S.F.S. Road 949); northerly and westerly along said road to the Steckley Road (U.S.F.S. Road 942); westerly along said road to Wyoming Highway 59; northerly along said highway to Wyoming Highway 450.

Area 11. Mule Creek. Beginning where the Dewey Road crosses the Wyoming-South Dakota state line; southerly along said line to U.S. Highway 18; westerly along said highway to the Old Highway 85 Road; southwestly along said road to U.S. Highway 85; southerly along said highway to the Wasserburger Road; westerly along said road to the North Lance Creek Road; northwesterly along said road to the Niobrara-Converse county line and the Dull Center Road (Converse County Road 38); westerly along said road to the Clareton Road (Converse County Road 39); northeasterly along said road to the Converse-Weston county line and the Lynch Road; northerly along said road to the Cheyenne River Road N. (Weston County); easterly along said road to U.S. Highway 85; northerly along said highway to the Dewey Road; southeasterly along said road to the Wyoming-South Dakota state line.

Area 12. Hat Creek. Beginning where U.S. Highway 18 intersects the Wyoming-South Dakota state line; southerly along said line to the Wyoming-Nebraska state line; southerly along said line to the Hat Creek Road; westerly along said road to U.S. Highway 85; northerly along said highway to Wyoming Highway 270; westerly along said highway to Wyoming Highway 272; northerly along said highway to the North Lance Creek Road; northerly along said road to the Wasserburger Road; easterly along said road to U.S. Highway 85; northerly along said highway to the Old Highway 85 Road; northeasterly along said road to U.S. Highway 18; easterly along said highway to the Wyoming-South Dakota state line.

Area 13. Lusk. Beginning where the Hat Creek Road intersects the Wyoming-Nebraska state line; southerly along said line to U.S. Highway 20; westerly along said highway to the Twenty Mile Creek Road (Converse County Road 46) at the town of Lost Springs; northerly along said road to the Manning Road (Converse County Road 53); easterly along said road to the Twenty Mile Road (Niobrara County) at the Converse-Niobrara county line; easterly along said road to Wyoming Highway 271; easterly along said highway to Wyoming Highway 270 at the town of Lance Creek; northerly and easterly along said highway to U.S. Highway 85; southerly along said highway to the Hat Creek Road; easterly along said road to the Wyoming-Nebraska state line.

Area 14. Twenty Mile. Beginning at the junction of Wyoming Highway 59 and the Dull Center Road (Converse County Road 38); easterly along said road to the East Bill Road (U.S.F.S. Road 958); easterly along said road to U.S.F.S. Road 958C; southeasterly along said road to the Iberlin Ranch Road; southerly along said road to Dry Creek; easterly down said creek to the Walker Creek Road (Converse County Road 43); easterly along said road to the Converse-Niobrara county line and the Walker Creek-Cow Creek Interconnect Road; northerly along said road to the Converse-Niobrara county line and the Cow Creek Road (Converse County Road 45); northerly along said road to the Tillard Ranch Road; easterly along said road to the Niobrara-Converse county line and the Tillard Ranch-Leverett Road; easterly along said road to the Cow Creek Road (Niobrara County); northerly along said road to the North Lance Creek Road; southerly along said road to Wyoming Highway 272; southerly along said highway to Wyoming Highway 270; southwesterly along said highway to the town of Lance Creek and Wyoming Highway 271; westerly along said highway to the Twenty Mile Road; westerly along said road to the Niobrara-Converse county line and the Manning Road (Converse County Road 53); southwesterly along said road to the Twenty Mile Creek Road (Converse County Road 46); southerly along said road to U.S. Highway 20 at the town of Lost Springs; southwesterly along said highway to Interstate Highway 25; southerly along said highway to the North Platte River; westerly and northerly up said river to Wyoming Highway 59 at the town of Douglas; northerly along said highway to the Dull Center Road.

Area 15. South Keeline. Beginning where U.S. Highway 20 intersects the Wyoming-Nebraska state line; southerly along said line to the Niobrara-Goshen county line trail and road (Goshen County Road 197); westerly along said trail and road to the Cundall Ranch Road (Goshen County Road 235); southwesterly along said road to U.S. Highway 85; northerly along said highway to the Niobrara-Goshen county line; westerly along said line to the radar tower and the Radar Tower Road (Goshen County Road 238); westerly along said road to Wyoming Highway 270; southerly along said highway to the Jireh Road (Platte County Road 201); westerly along said road to the Flat Top Road (Platte County Road 121); westerly along said road to the Cedar Top Road (Platte County Road 175); northerly along said road to Spanish Creek; westerly down said creek to Muddy Creek; southerly down said creek to Glendo Reservoir and the North Platte River; northwesterly up said river to Interstate Highway 25; northerly along said highway to U.S. Highway 20 at Orin Junction; easterly along said highway to the Wyoming-Nebraska state line.

Area 16. Meadowdale/Jay Em. Beginning where U.S. Highway 26 crosses the Wyoming-Nebraska state line; westerly along said highway to the North Platte River; up said river to Muddy Creek; northerly up said creek to Spanish Creek; easterly up said creek to the Cedar Top Road (Platte County Road 175); southerly along said road to the Flat Top Road (Platte County Road 121); easterly along said road to the Jireh Road (Platte County Road 201); easterly along said road to Wyoming Highway 270; northerly along said highway to the Radar Tower Road (Goshen County Road 238); easterly along said road to the radar tower and the Niobrara-Goshen county line; easterly along said line to U.S. Highway 85; southerly along said highway to the Cundall Ranch Road (Goshen County Road 235); northeasterly along said road to the Niobrara-Goshen county line trail and road (Goshen County Road 197); east along said trail and road to the Wyoming-Nebraska state line; south along said line to U.S. Highway 26.

Area 17. Northwest Gillette. Beginning where the Buffalo Creek Road intersects the Wyoming-Montana state line; southerly along said road to the Beason Road; southerly along said road to the Recluse Road; southerly along said road to U.S. Highway 14-16; southeasterly along said highway to Interstate Highway 90; westerly along said highway to the Powder River; northerly down said river to the Wyoming-Montana state line; easterly along said line to the Buffalo Creek Road.

Area 18. Campbell. Beginning where the Rocky Point Road crosses the Wyoming-Montana state line; southerly along said road to the "D" Road; southerly along said road to Interstate Highway 90; westerly along said highway to U.S. Highway 14-16; northerly along said highway to the Recluse Road; northerly along said road to the

Beason Road; northerly along said road to the Buffalo Creek Road; northerly along said road to the Wyoming-Montana state line; easterly along said line to the Rocky Point Road.

Area 19. Pumpkin Buttes. Beginning at the intersection of Interstate Highway 90 and the 4-J Road at the city of Gillette; southerly along said road to Wyoming Highway 50; southwesterly along said highway to Wyoming Highway 387; southwesterly along said highway to Wyoming Highway 192; northwesterly along said highway to the Streeter Road (Johnson County Road 135); northerly along said road to the Powder River; northerly down said river to Interstate Highway 90; easterly along said highway to the intersection of Interstate Highway 90 and the 4-J Road at the city of Gillette.

Area 20. Clarkelen. Beginning at the intersection of Interstate Highway 90 and Wyoming Highway 59 at the city of Gillette; southerly along said highway to Wyoming Highway 387; southwesterly along said highway to Wyoming Highway 50; northeasterly along said highway to the 4-J Road; northeasterly along said road to Interstate Highway 90; easterly along said highway to Wyoming Highway 59.

Area 21. Thunder Basin. Beginning where Interstate Highway 90 crosses the Belle Fourche River; southwesterly up said river to the divide between Four Horse Creek and Raven Creek; southerly along said divide to the divide between the Cheyenne River and Belle Fourche River; southwesterly along said divide to Newel Prong; southerly down said prong to Bacon Creek; southerly down said creek to Black Thunder Creek; westerly up said creek to the Keeline Road (U.S.F.S. Road 930); southeasterly along said road to Wyoming Highway 450; westerly along said highway to Wyoming Highway 59; northerly along said highway to Interstate Highway 90 at the city of Gillette; easterly along said highway to the Belle Fourche River.

Area 22. Douglas. Beginning at the intersection of the North Platte River and Wyoming Highway 95 at the town of Glenrock; northeasterly along said highway to the 55 Ranch Road (Converse County Road 23); northerly along said road to the Sage Creek Divide-Blizzard Heights Road; easterly along said road to the Ross Road (Converse County Road 31); northwesterly along said road into Campbell County and to Wyoming Highway 387; northeasterly along said highway to Wyoming Highway 59 at Reno Junction; southerly along said highway to the North Platte River at the town of Douglas; westerly up said river to Wyoming Highway 95.

Area 23. Clearmont. Beginning where the Powder River crosses the Wyoming-Montana state line; southerly up said river to U.S. Highway 14; westerly along said highway to the Meade Creek Road (Sheridan County Road 131); southwesterly along said road to Interstate Highway 90; northerly along said highway to Wyoming Highway 338; northeasterly along said highway to the Wyoming-Montana state line; easterly along said line to the Powder River.

Area 24. Sheridan. Beginning where Wyoming Highway 338 crosses the Wyoming-Montana state line; southerly along said highway to Interstate Highway 90; southerly along said highway to the Piney Creek interchange and U.S. Highway 87; northwesterly along said highway to Wyoming Highway 193; northwesterly along said highway to South Piney Creek; westerly up said creek to the Bighorn National Forest boundary; northwesterly along said boundary to the Wyoming-Montana state line; easterly along said line to Wyoming Highway 338.

Area 25. Tongue-Goose. Beginning where the Wyoming-Montana state line and the east boundary of the Bighorn National Forest intersect; southeasterly along said boundary to South Piney Creek; southwesterly up said creek to the divide along the Big Horn Mountain range; northwesterly along said divide to U.S. Highway 14 at Granite Pass; northerly along said highway to the Hunt Mountain Road (U.S.F.S. Road 10); northwesterly along said road to U.S. Highway 14A; northwesterly along said highway to the Devils Canyon Road (U.S.F.S. Road 14); northerly along said road to the Sheep Mountain Road (U.S.F.S. Road 11); northerly along said road to the Wyoming-Montana state line; easterly along said line to the east boundary of the Bighorn National Forest.

Area 26. Ucross. Beginning where U.S. Highway 14 crosses the Powder River; southerly up said river to Interstate Highway 90; northwesterly along said highway to the Meade Creek Road (Sheridan County Road 131); northeasterly along said road to U.S. Highway 14; easterly along said highway to the Powder River.

Area 27. Buffalo. Beginning where Wyoming Highway 193 crosses South Piney Creek; southeasterly along said highway to U.S. Highway 87; southeasterly along said highway to Interstate Highway 90; southerly along

said highway to Interstate Highway 25; southerly along said highway to the Trabing Road (Johnson County Road 13); westerly along said road to Wyoming Highway 196; southerly along said highway to the Crazy Woman Canyon Road (Johnson County Road 14); westerly along said road to the Bighorn National Forest boundary; northerly along said boundary to South Piney Creek; easterly down said creek to Wyoming Highway 193.

Area 28. Hunter Mesa. Beginning where South Piney Creek crosses the east boundary of the Bighorn National Forest; southerly and westerly along said boundary to the Gold Mine Road (U.S.F.S. Road 452); northerly along said road to the Canyon Creek Road (U.S.F.S. Road 25); northerly along said road to U.S. Highway 16 and the divide along the Big Horn Mountain range at Powder River Pass; northerly along said divide to the head of South Piney Creek; northeasterly down said creek to the east boundary of the Bighorn National Forest.

Area 29. Johnson. Beginning where Interstate Highway 90 crosses the Powder River; southerly up said river to the Streeter Road (Johnson County Road 135); southerly along said road to Wyoming Highway 192; southeasterly along said highway to the West Sussex Oil Field Road at the town of Linch; westerly along said road to old U.S. Highway 87; west from the junction of the West Sussex Oil Field Road and old U.S. Highway 87 to Interstate Highway 25; northerly along said highway to Interstate Highway 90; southeasterly along said highway to the Powder River.

Area 30. Upper Powder River. Beginning at the junction of the Trabing Road (Johnson County Road 13) and Interstate Highway 25; southerly along Interstate Highway 25 to the point east of the U.S. Highway 196-Mesa Road (Johnson County Road 115) junction; west to the U.S. Highway 196-Mesa Road junction; southwestward along the Mesa Road to the Mayoworth Road (Johnson County Road 266) at the town of Mayoworth; westerly along said road to the Slip Road (Johnson County Road 67); westerly along said road to the Hazelton Road (Johnson County Road 3); northerly along said road to the Gold Mine Road (U.S.F.S. Road 452); northwestward along said road to the Bighorn National Forest boundary; easterly and northerly along said boundary to the Crazy Woman Canyon Road (Johnson County Road 14); easterly along said road to Wyoming Highway 196; northerly along said highway to the Trabing Road; easterly along said road to Interstate Highway 25.

Area 31. Salt Creek. Beginning at the junction of the West Sussex Oil Field Road and Wyoming Highway 192 at the town of Linch; southeasterly along said highway to Wyoming Highway 387; southwestward along said highway to Interstate Highway 25; northwestward along said highway to the point on Interstate Highway 25 due west of the junction of old U.S. Highway 87 and the West Sussex Oil Field Road; east from Interstate Highway 25 to the junction of old U.S. Highway 87 and the West Sussex Oil Field Road; easterly along said road to Wyoming Highway 192 at the town of Linch.

Area 32. Beartrap Creek. Beginning where the Slip Road (Johnson County Road 67) crosses Arch Creek west of the town of Mayoworth; southerly down said creek to Beartrap Creek; southerly down said creek to the North Fork of the Red Fork of the Powder River; southeasterly down said river to the Ken Graves Ranch Road; southerly down said road to the Barnum Road (Johnson County Road 78); southerly along said road to the Barnum Mountain Road; westerly along said road to the Hazelton Road (Washakie County Road 81-Johnson County Road 3); northerly along said road to the Slip Road; southeasterly along said road to Arch Creek.

Area 33. Red Fork. Beginning at the town of Kaycee and Interstate Highway 25; southeasterly along said highway to the South Fork of the Powder River; southerly up said river to Willow Creek; southwestward up said creek to the Lone Bear Road (Natrona County Road 112); northerly along said road to the Willow Creek Road (Natrona County Road 111); southwestward along said road to the 33 Mile Road (Natrona County Road 110); northwestward along said road to Buffalo Creek; northerly down said creek to the Middle Fork of the Powder River; westerly up said river to the Outlaw Cave Access Road; northerly along said road to the Barnum Road (Johnson County Road 78) at the town of Barnum; northerly along said road to the Ken Graves Ranch Road; northerly along said road to the North Fork of the Red Fork of the Powder River at the Ken Graves Ranch; northwestward up said river to Beartrap Creek; northwestward up said creek to Arch Creek; northerly up said creek to the Slip Road (Johnson County Road 67); easterly along said road to the Mayoworth Road (Johnson County Road 266); easterly along said road to the Mesa Road (Johnson County Road 115) at Mayoworth; northeasterly along said road to Wyoming Highway 196; due east from the junction of the Mesa Road and Wyoming Highway 196 to the Interstate Highway 25; southerly along said highway to the town of Kaycee.



Area 34. Natrona. Beginning at the intersection of Interstate Highway 25 and U.S. Highway 20-26 in the city of Casper; westerly along U.S. Highway 20-26 to the Waltman-Arminto Road (Natrona County Road 104); northerly along said road to Natrona County Road 105; northerly along said road to the E-K Stock Trail; northerly along said trail to the Bighorn Trail Road; northerly along said road to the divide between the Middle Fork of the Powder River and North Buffalo Creek; easterly and northerly along said divide to the Big Horn Mountain Road (Natrona County Road 109); northeasterly along said road to the 33 Mile Road (Natrona County Road 110); southeasterly along said road to the Wild Horse Trail Road (Natrona County Road 113); easterly along said road to the Dead Horse Road (Natrona County Road 114); northeasterly along said road to the Smoky Gap Road (Natrona County Road 115); easterly along said road to U.S. Highway 387; easterly along said highway to Wyoming Highway 259 at the town of Midwest; southerly along said highway to Interstate Highway 25; southerly along said highway to U.S. Highway 20-26 in the city of Casper.

Area 35. Upper Nowood. Beginning at Cottonwood Pass and the Nowood Road; northeasterly along said road to Deep Creek; up said creek to Lost Creek; up said creek to the Cherry Creek Hill Stock Drive Road; northeasterly along said road to the Hazelton Road (Big Horn Mountain Road); southerly along said road to the divide between the Middle Fork of the Powder River and the north fork of Buffalo Creek; southwestly along said divide to the Big Horn Trail; southerly and westerly along said trail to the Oakie Road (Natrona County Road 101); westerly along said road to Sioux Pass and the Devil's Slide Road; westerly along said road to the divide between Nowood Creek and Badwater Creek; southwestly then northwestly along said divide to the Nowood Road at Cottonwood Pass.

Area 36. Badwater. Beginning at the town of Shoshoni and U.S. Highway 20-26; westerly along said highway to the east shoreline of Boysen Reservoir; northerly along said shoreline to Boysen Dam and the Wind River; northerly down said river to Gold Creek (excluding Indian tribal trust lands immediately north of U.S. Highway 20-26 near Boysen Reservoir and northeast of Boysen Dam); easterly up Gold Creek to the divide between Buffalo Creek and Badwater Creek on Copper Mountain; easterly along said divide to West Bridger Creek; easterly down said creek to the Kirby Creek Road (Hot Springs County Road 7); northerly along said road to Little V-H Draw; northeasterly up said draw to the Packsaddle Road; southerly along said road to the Bridger Creek Road; northeasterly along said road to the Pine Creek Road at the Gardner Summer Ranch; easterly up said road to the Seaman Ranch Road; easterly, southerly, then easterly along said road to the divide between Nowood Creek and Badwater Creek at Cottonwood Pass; southeasterly then northeasterly along said divide to the Devil's Slide Road; easterly along said road to Sioux Pass and the Oakie Trail (Natrona County Road 101); easterly along said trail to the Big Horn Trail; easterly along said trail to the E-K Stock Trail; southerly along said trail to the Buffalo Creek Road (Natrona County Road 105); southerly along said road to the Arminto Road (Natrona County Road 104); southerly along said road to Waltman and U.S. Highway 20-26; westerly along said highway to the town of Shoshoni.

Area 37. Copper Mountain. Beginning at the confluence of the Big Horn River and Walter's Draw; easterly up said draw to the divide between Nowater Creek and Kirby Creek; easterly along said divide to the Murphy Dome-Mud Creek Road (BLM Road 1409); southerly along said road to Wyoming Highway 172 (Black Mountain Road); westerly along said highway to Kirby Creek Road (Hot Springs County Road 7); southeasterly along said road to West Bridger Creek; westerly up said creek to the divide between Buffalo Creek and Badwater Creek; westerly along said divide to the head of Gold Creek; westerly down said creek to the east boundary of the Wind River Indian Reservation; north and west along said boundary to the Big Horn River; northerly down said river to Walter's Draw.

Area 38. Black Mountain. Beginning at the intersection of the Kirby Creek Road (Hot Springs County Road 7) and Wyoming Highway 172 (Black Mountain Road); easterly along said highway to Murphy Dome-Mud Creek Road (BLM Road 1409); northeasterly along said road to the Nowater Stock Drive Road (BLM Road 1404); easterly along said road to the Seaman Ranch Road (Lysite Mountain Road); southerly along said road to the Pine Creek Road; westerly along said road to the Bridger Creek Road at the Gardner Summer Ranch; southwestly along said road to the Packsaddle Road; northerly along said road to the head of Little V-H Draw; southwestly down said draw to the Kirby Creek Road (Hot Springs County Road 7); northerly along said road to Wyoming Highway 172.

Area 39. Bates Creek. Beginning at the junction of the Upper Nowood Road and the Seaman Ranch Road (Lysite Mountain Road) at Cottonwood Pass; westerly then northerly along the Seaman Ranch Road (Lysite Mountain Road) to the Nowater Stock Drive Road (BLM Road 1404); southeasterly along said road to the Hampton Stock Drive Road; easterly along said road to the Hampton Ranch and the Upper Nowood Road; southerly along said road to the Seaman Ranch Road (Lysite Mountain Road).

Area 40. Buffalo Creek. Beginning at the junction of the Upper Nowood Road and the Dry Farm Road (Big Trails Stock Drive Road); easterly along said road to the Hazelton Road (Big Horn Divide Road); southerly along said road to the Cherry Creek Hill Stock Drive Road; westerly along said road to Lost Creek; northwesterly down said creek to Deep Creek; northerly down said creek to the Upper Nowood Road; northeasterly along said road to the Hampton Stock Drive Road (SV Draw); westerly along said road to the Nowater Stock Drive Road (BLM Road 1404); northwesterly along said road to Buffalo Creek; northeasterly down said creek to the Nowood River; southerly up said river to Crooked Creek; southeasterly up said creek to the Upper Nowood Road; southerly along said road to Dry Farm Road (Big Trails Stock Drive Road).

Area 41. Sand Creek. Beginning at the town of Hyattville; southerly along the Hyattville-Ten Sleep Road (Washakie County Road 54) to U.S. Highway 16; westerly along said highway to U.S. Highway 20-Wyoming Highway 789; southerly along said highway to its junction with the Big Horn Canal three quarter mile south of the town of Worland; northerly along said canal to U.S. Highway 16-20; easterly along said highway to Wyoming Highway 31; easterly along said highway to the town of Hyattville.

Area 42. Otter Creek. Beginning at the intersection of U.S. Highway 16 and the Bighorn National Forest western boundary; southerly then easterly along said boundary to the Hazelton Road (Big Horn Mountain Divide Road); southerly along said road to the Dry Farm Road (Big Trails Road Stock Drive Road); westerly along said road to the Upper Nowood Road; northerly along said road to Crooked Creek; northwesterly down said creek to the Nowood River; northerly down said river to Buffalo Creek; southwesterly up said creek to the Nowater Stock Drive Road (BLM Road 1404); northwesterly along said road to the Bluebank Road (BLM Road 1411); northerly along said road to U.S. Highway 16; easterly along said highway to the Bighorn National Forest boundary.

Area 43. Leigh Creek. Beginning at the intersection of U.S. Highway 16 and the Gold Mine Road (U.S.F.S. Road 25 and 452); southerly along said road to the Bighorn National Forest boundary; westerly along said boundary to U.S. Highway 16; northeasterly then easterly along said highway to the Gold Mine Road (U.S.F.S. Road 25 and 452).

Area 44. Brokenback Creek. Beginning at Washakie County Road 54 in the town of Ten Sleep; northerly along said road to the Hyattville Logging Road (BLM Road 1117); southeasterly along said road to the Bighorn National Forest boundary; southerly along said boundary to U.S. Highway 16; southwesterly along said highway to the town of Ten Sleep.

Area 45. Paint Rock Creek. Beginning at the intersection of Wyoming Highway 31 and the Cold Springs Road (becomes BLM/U.S.F.S. Road 344 at forest boundary) near the town of Hyattville; northeasterly along said road to the Bighorn National Forest boundary; southeasterly along said boundary to the Hyattville Logging Road (becomes U.S.F.S. Road 408 at forest boundary) (BLM Road 1117); westerly along said road to Washakie County Road 54; northerly along said road to the town of Hyattville.

Area 46. Cloud Peak. Beginning at Granite Pass on U.S. Highway 14 and the divide along the Bighorn Mountain range; southeasterly along said divide to the U.S. Highway 16 at Powder River Pass; westerly along said highway to the Bighorn National Forest Boundary; northerly along said boundary to the Alkali Road (U.S.F.S. Road 338); easterly along said road to the Shell Ranger Station-Paintrock Lakes Road (U.S.F.S. Road 17); northwesterly along said road to U.S. Highway 14; northerly along said highway to Granite Pass.

Area 47. Manderson. Beginning at the junction of U.S. Highway 16-20 and U.S. Highway 14 in the town of Greybull; easterly along U.S. Highway 14 to the Red Gulch Road (BLM Road 1109); southeasterly along said road to the Alkali Road (BLM Road 1111); northeasterly along said road to the Bighorn National Forest boundary; southeasterly along said boundary to the Cold Springs Road (BLM/U.S.F.S. Road 344); southwesterly along said

road to Wyoming Highway 31; westerly along said highway to U.S. Highway 16-20; northerly along said highway to U.S. Highway 14 in the town of Greybull.

Area 49. Trapper Creek. Beginning at the town of Shell on U.S. Highway 14; easterly along said highway to the Shell Ranger Station-Paint Rock Lakes Road (U.S.F.S. Road 17); southeasterly along said road to the Alkali Road (U.S.F.S. Road 338); southwesterly along said road to the Red Gulch Road (BLM Road 1109); westerly then northwesterly along said road to U.S. Highway 14; easterly along said highway to the town of Shell.

Area 50. Upper Shell-Beaver Creek. Beginning at the Bighorn National Forest boundary and U.S. Highway 14A; easterly along said highway to the Hunt Mountain Road (U.S.F.S. Road 10); southwesterly along said road to U.S. Highway 14; southerly then westerly along said highway to the Bighorn National Forest boundary; northwesterly along said boundary to U.S. Highway 14A.

Area 51. Beaver Creek. Beginning at the Big Horn River in the town of Greybull; northerly down said river to Bear Creek; northeasterly up said creek to the Bighorn National Forest boundary; southeasterly along said boundary to U.S. Highway 14; westerly along said highway to the Big Horn River.

Area 52. Crystal Creek. Beginning at the Big Horn River and U.S. Highway 14A nine (9) miles east of the town of Lovell; easterly along said highway to the Bighorn National Forest boundary; southeasterly along said boundary to Bear Creek; southwesterly down said creek to the Big Horn River; northerly down said river to U.S. Highway 14A.

Area 53. Devils Canyon. Beginning where U.S. Highway 14A crosses the Big Horn River; northerly down said river to the Wyoming-Montana state line; easterly along said line to the Sheep Mountain Road (U.S.F.S. Road 11); southerly along said road to the Devils Canyon Road (U.S.F.S. Road 14); southerly along said road to U.S. Highway 14A; westerly along said highway to the Big Horn River.

Area 55. Rock Eagle. Beginning where U.S. Highway 26 crosses the Wyoming-Nebraska state line; south along said line to Wyoming Highway 151; westerly along said highway to U.S. Highway 85; northerly along said highway to Wyoming Highway 313; westerly along said highway to the town of Chugwater and Interstate Highway 25; northerly along said highway to U. S. Highway 26; easterly along said highway to the Wyoming-Nebraska state line.

Area 57. Southeast. Beginning at the junction of Wyoming Highway 151 and the Wyoming-Nebraska state line; south along said line to the Wyoming-Colorado state line; west along said line to Interstate Highway 25; northerly along said highway to the town of Chugwater and Wyoming Highway 313; easterly along said highway to U.S. Highway 85; southeasterly along said highway to Wyoming Highway 151; easterly along said highway to the Wyoming-Nebraska state line.

Area 59. Little Bear. Beginning at the junction of Wyoming Highway 211 and Interstate Highway 25 near the town of Chugwater; southerly along Interstate Highway 25 to Wyoming Highway 211 near the city of Cheyenne; northwesterly along said highway to the Horse Creek-Iron Mountain Road (Laramie County Road 106-2-Platte County Road 10); northeasterly along said road to Wyoming Highway 211; northeasterly along said road to Interstate Highway 25.

Area 60. Pole Mountain. Beginning in the city of Laramie and the Rogers Canyon-Ninth Street Road (Albany County Road 17-Laramie County Road 228); northeasterly along said road to Wyoming Highway 211 (Horse Creek-Chugwater Road); southeasterly along said highway to Interstate Highway 25; southerly along said highway to Interstate Highway 80; westerly along said highway to the city of Laramie.

Area 61. Harriman. Beginning at the city of Laramie and Interstate Highway 80; southeasterly along said highway to Interstate Highway 25 near the city of Cheyenne; southerly along said highway to the Wyoming-Colorado state line; west along said line to U.S. Highway 287; northerly along said highway to Interstate Highway 80.

Area 62. Iron Mountain. Beginning at the junction of U.S. Highway 30 and Wyoming Highway 34; northeasterly along Wyoming Highway 34 to the Sybille Canyon Road (Albany County Road 12); easterly along said road to the Bell Ranch Road; southeasterly along said road to the McLees Road (Laramie County Road 103-1); southeasterly along said road to Wyoming Highway 211; southerly along said highway to the Fisher Canyon-Rogers Canyon Road (Laramie County Road 228-1-Albany County Road 17) at Horse Creek Station; westerly along said road to U.S. Highway 30; northerly along said highway to Wyoming Highway 34.

Area 63. Richeau. Beginning at the junction of Wyoming Highway 34 and the Sybille Canyon Road (Albany County Road 12); northeasterly along said highway to Interstate Highway 25; southerly along said highway to Wyoming Highway 211; southwesterly along said highway to Platte County Road 210-Laramie County Road 103; southwesterly along said road to the McLees Road (Laramie County Road 103); westerly along said road to the Bell Ranch Road; northwesterly along said road to the Sybille Canyon Road (Albany County Road 12); southerly and westerly along said road to Wyoming Highway 34.

Area 64. Laramie Peak. Beginning at the junction of Interstate Highway 25 and Wyoming Highway 34; southwesterly along Highway 34 to the Flat Top-Round Top Road west of Morton Pass; northwesterly along said road to the Big Laramie River (at the steel bridge); northerly down said river to the Dodge Ranch Road; northerly along said road to the Garrett Road (Albany County Road 713); northwesterly along said road to the Bear Creek Road (Albany County Road 77); northerly along said road to U.S.F.S. Road 671; northerly and westerly along said road to the Esterbrook Road (Albany County Road 710-Converse County Road 5 and 7-U.S.F.S. Road 653); northeasterly along said road to the Glendo-Esterbrook Road (Ridge Road; Converse County Road 6-Platte County Road 135); easterly along said road to the Glendo Park Road (Platte County Road 17) at the town of Glendo; easterly along said road to the North Platte River; southeasterly down said river to U.S. Highway 26; westerly along said highway to Interstate Highway 25; southerly along said highway to Wyoming Highway 34.

Area 65. South Converse. Beginning where Wyoming Highway 95 crosses the North Platte River at the town of Glenrock; easterly and southerly down said river to the Glendo Reservoir Dam and the Glendo Park Road (Platte County Road 17); westerly along said road to the town of Glendo and the Glendo-Esterbrook Road (Ridge Road; Platte County Road 135-Converse County Road 6); westerly along said road to the Esterbrook Road (Converse County Road 5 and 7-U.S.F.S. Road 653-Albany County Road 710); southwesterly along said road to the divide between Horseshoe Creek and the North Laramie River; westerly and northerly along said divide to the head of South Fork Creek, a tributary of LaBonte Creek; northeasterly along said creek to U.S.F.S. Road 658; westerly along said road to the Fetterman Road (Albany County Road 61); northerly along said road to the divide between Corduroy Creek and Rocky Ford Creek; westerly along said divide to the divide between LaPrele Creek and the Little Medicine Bow River; westerly along said divide to the Cold Springs Road (Converse County Road 24); southwesterly along said road to U.S.F.S. Road 660; northwesterly along said road to Curry Creek; northwesterly down said creek to Deer Creek; northerly down said creek to the Stephens Road (Converse County Road 20); northerly along said road to the Deer Creek Road (Converse County Road 19); northerly along said road to Wyoming Highway 95; northerly along said highway to the North Platte River at the town of Glenrock.

Area 66. Bates Hole-Hat Six. Beginning where Wyoming Highway 95 crosses the North Platte River at the town of Glenrock; southerly along said highway to the Deer Creek Road (Converse County Road 19); southerly along said road to the Stephens Road (Converse County Road 20); southerly along said road to Deer Creek; southerly up said creek to Curry Creek; southeasterly up said creek to U.S.F.S. Road 660; westerly along said road to the Squaw Spring Trail Road; southwesterly along said road to the divide between Spring Creek and the Bates Creek drainage; westerly along said divide to the divide between the Bates Creek drainage and Sand Creek; westerly along said divide to Wyoming Highway 487; southerly along said highway to the Shirley Ridge Road (Carbon County Road 2); southwesterly along said road to Wyoming Highway 77; southerly along said highway to the Chalk Mountain Road (BLM Road 3129); westerly and northerly along said road to the Dry Creek Road (Carbon County Road 103); northwesterly along said road to the south fork of Canyon Creek; westerly and northerly down said fork to Canyon Creek; westerly down said creek to Pathfinder Reservoir and the North Platte River; northerly and easterly down said river to Wolf Creek; southerly up said creek to its head; southerly one and one-eighth (1 1/8) miles to the Casper Mountain area boundary marker; due east two and one-quarter (2 1/4) miles to the west boundary of Star Wallow; southerly along said boundary one and one-half (1 1/2) miles to the switchback of the Circle Drive Road (Natrona County Road 505); southerly along said road to the head of the Clear Fork of Muddy Creek; easterly down said fork to the Casper Mountain area boundary marker; north two (2) miles to the southeast

corner of Crimson Dawn Park; northerly and westerly along the east and north boundary of said park to the north entrance road; northerly along said road to the East End Road (Natrona County Road 506); northeasterly along said road to the head of the East Fork of Elkhorn Creek; northerly down said creek to the lower timberline on Casper Mountain; westerly along said timberline to the Casper Mountain Road (Wyoming Highway 251); northerly along said road to the Casper city limits; easterly and northerly along said city limits to Interstate Highway 25; easterly along said highway to the Cole Creek Road (Wyoming Highway 256); northerly along said highway to the North Platte River; easterly down said river to Wyoming Highway 95 at the town of Glenrock.

Area 67. Casper Mountain. Beginning where Wolf Creek enters the North Platte River; easterly down said river to Cole Creek Road (Wyoming Highway 256); southerly along said highway to Interstate Highway 25; westerly along said highway to the Casper city limits; southerly and westerly along said city limits to Casper Mountain Road (Wyoming Highway 251); southerly along said road to the lower timberline on Casper Mountain; easterly along said timberline to the East Fork of Elkhorn Creek; southerly up said creek to the East End Road (Natrona County Road 506); southwesterly along said road to the north entrance road to Crimson Dawn Park; southerly along said road to the Crimson Dawn Park boundary; easterly and southerly along said boundary to the southeast corner of the park; southerly to the Clear Fork of Muddy Creek and the Casper Mountain area boundary marker; southwesterly up said creek to the Circle Drive Road (Natrona County Road 505); northerly along said road to the switchback; northerly one and one-half (1 ½) miles along the west boundary of Star Wallow; west two and one-fourth (2 ¼) miles to the Casper Mountain area boundary marker; northerly to the head of Wolf Creek; northerly down said creek to the North Platte River.

Area 70. Shirley Mountain. Beginning where Wyoming Highway 487 intersects U.S. Highway 30 at the town of Medicine Bow; westerly along U.S. Highway 30 to Wyoming Highway 72; northerly along said highway to the town of Hanna and the Hanna-Leo Road (Carbon County Road 291); northerly along said road to the Medicine Bow River; westerly down said river to Seminole Reservoir and the North Platte River; northerly down said river to where Canyon Creek enters Pathfinder Reservoir; easterly up said creek to the south fork of Canyon Creek; easterly and southerly up said fork to the Dry Creek Road (Carbon County Road 103); southeasterly along said road to the Chalk Mountain Road (BLM Road 3129); easterly and southerly along said road to Wyoming Highway 77; northerly along said highway to the Shirley Ridge Road (Carbon County Road 2); northeasterly along said road to Wyoming Highway 487; southerly along said highway to the intersection with U.S. Highway 30 at the town of Medicine Bow.

Area 73. Boswell. Beginning at the junction of the Marshall Road (Albany County Road 610) and U.S. Highway 30 north of the town of Rock River; northwesterly along said highway to the junction with Wyoming Highway 487 at the town of Medicine Bow; northerly along said highway to the divide between Hunt Creek and Sand Creek; easterly along said divide to the divide between Lone Tree Creek and Spring Creek; easterly along said divide to the Old Medicine Bow Road (Carbon County Road 97); northerly along said road to the Squaw Springs Trail Road; northerly along said road to U.S.F.S. Road 660; southeasterly along said road to the Cold Springs Road (Converse County Road 24); easterly along said road to the divide between the Little Medicine Bow River and LaPrele Creek; easterly along said divide to the divide between Corduroy Creek and Rocky Ford Creek; easterly along said divide to the Fetterman Road (Albany County Road 61); southerly along said road to U.S.F.S. Road 658; easterly along said road to South Fork Creek, a tributary to LaBonte Creek; southerly up said creek to the divide between Horseshoe Creek and the North Laramie River; southerly and easterly along said divide to the Esterbrook Road (Albany County Road 710); northeasterly along said road to U.S.F.S. Road 671; easterly and southerly along said road to the Bear Creek Road (Albany County Road 77); southwesterly along said road to the Garrett Road (Albany County Road 713); southeasterly along said road to the Dodge Ranch Road; southerly along said road to the Big Laramie River; southerly up said river to the Round Top-Flat Top Road at the steel bridge; southeasterly along said road to Wyoming Highway 34; southwesterly along said highway to U.S. Highway 30; northwesterly along said highway to the Marshall Road (Albany County Road 610).

Area 74. Kyle. Beginning where U.S. Highway 30 intersects Wyoming Highway 72; southeasterly along said highway to the city of Laramie and Interstate Highway 80; northwesterly along said highway to Wyoming Highway 72; northerly along said highway to U.S. Highway 30.

Area 75. Four Mile. Beginning at the city of Laramie and Wyoming Highway 130; westerly along said highway to the divide between the Laramie River and the North Platte River; northerly along said divide to

Medicine Bow Peak and the divide between the Medicine Bow River and Brush Creek; northeasterly along said divide to the North Brush Creek Road (U.S.F.S. Road 100); northerly along said road to the Sand Lake Road (U.S.F.S. Road 101); northwesterly along said road to the Cedar Pass Road (U.S.F.S. Road 261); southwesterly along said road to U.S.F.S. Road 115; northerly along said road to the Pass Creek Basin Road; northerly along said road to the Pass Creek Road (Carbon County Road 404); northerly along said road to Wyoming Highway 72; northwesterly along said highway to Interstate Highway 80 to the west Elk Mountain interchange; southeasterly along said highway to Wyoming Highway 130.

Area 76. Sheep Mountain. Beginning at the city of Laramie and Wyoming Highway 230; southwesterly along said highway to Wyoming Highway 10 at Woods Landing; southerly along said highway to the Wyoming-Colorado state line; west along said line to Wyoming Highway 230; northeasterly along said highway to U.S.F.S. Road 512; northwesterly along said road to U.S.F.S. Road 543; northerly along said road to Douglas Creek at Keystone; northerly up said creek to the divide between the Laramie River and the North Platte River; northerly along said divide to Wyoming Highway 130; easterly along said highway to Wyoming Highway 230.

Area 77. Boulder Ridge. Beginning at the city of Laramie and U.S. Highway 287; southerly along said highway to the Wyoming-Colorado state line; westerly along said line to Wyoming Highway 10; northerly along said highway to Wyoming Highway 230 at Woods Landing; northeasterly along said highway to U.S. Highway 287.

Area 78. French Creek. Beginning where Wyoming Highway 130 crosses the divide between the Laramie River and the North Platte River; southerly along said divide to Douglas Creek; southerly down said creek to U.S.F.S. Road 543 at Keystone; southerly along said road to U.S.F.S. Road 512; southeasterly along said road to Wyoming Highway 230; southwesterly along said highway to the Wyoming-Colorado state line; westerly along said line to Wyoming Highway 230; northwesterly along said highway to Wyoming Highway 130; easterly along said highway to the divide between the Laramie River and the North Platte River.

Area 79. Kennaday Peak. Beginning where Interstate Highway 80 crosses the North Platte River; easterly along said highway to U.S. Highway 30; easterly along said highway to Wyoming Highway 72; southerly along said highway to the Pass Creek Road (Carbon County Road 404); southerly along said road to the Pass Creek Basin Road; southerly along said road to U.S.F.S. Road 115; southerly along said road to the Cedar Pass Road (U.S.F.S. Road 261); northeasterly along said road to the Sand Lake Road (U.S.F.S. Road 101); southeasterly along said road to the North Brush Creek Road (U.S.F.S. Road 100); southerly along said road to the divide between Brush Creek and the Medicine Bow River; southeasterly along said divide to Medicine Bow Peak and the divide between the Laramie River and the North Platte River; southerly along said divide to Wyoming Highway 130; westerly and northerly along said highway to the North Platte River in the town of Saratoga; northerly down said river to Interstate Highway 80.

Area 80. Spring Creek. Beginning at the Continental Divide on Wyoming Highway 70; northerly along said divide to the Rawlins-Sandstone Road; northerly along said road to Sage Creek; northeasterly down said creek to the North Platte River; southerly up said river to the town of Saratoga and Wyoming Highway 130; southerly along said highway to Wyoming Highway 230; southerly along said highway to Wyoming Highway 70 at the town of Riverside; southwesterly along said highway to the Continental Divide.

Area 81. Blackhall. Beginning at the Wyoming-Colorado state line and Wyoming Highway 230; westerly along said line to the Continental Divide; northerly along said divide to Wyoming Highway 70; northeasterly along said highway to Wyoming Highway 230 at the town of Riverside; easterly and southeasterly along said highway to the Wyoming-Colorado state line.

Area 82. Baggs. Beginning at the junction of Wyoming Highway 789 and the Wyoming-Colorado state line; northerly along said highway to Muddy Creek north of Dad; easterly up said creek to the Muddy Creek Road (BLM Road 3306); easterly along said road to Miller Hill Road (BLM Road 3328); southeasterly along said road to McCarty Canyon Road (Carbon County Road 503); northeasterly along said road to Rawlins City Water Works Road; northerly along said road to Sage Creek below Sage Creek Reservoir; northeasterly down said creek to Sage Creek Road (Carbon County Road 401); southerly along said road to the Continental Divide at Middlewood Hill; southerly along said divide to the Wyoming-Colorado state line; westerly along said line to Wyoming Highway 789.

Area 83. Bolten Rim. Beginning at the city of Rawlins; easterly along Interstate Highway 80 to the North Platte River; southerly up said river to Sage Creek; southwesterly up said creek to the Sage Creek Road (Carbon County Road 401); northerly along said road to Wyoming Highway 71; northerly along said highway to the city of Rawlins.

Area 84. Atlantic Rim. Beginning at the city of Rawlins; southerly along Wyoming Highway 71 to the Sage Creek Road (Carbon County Road 401); southerly along said road to Sage Creek; southwesterly up said creek to the Rawlins City Water Works Road below Sage Creek Reservoir; southerly along said road to the McCarty Canyon Road (Carbon County Road 503); southwesterly along said road to the Miller Hill Road (BLM Road 3328); northwesterly along said road to the Muddy Creek Road (BLM Road 3306); westerly along said road to Muddy Creek; westerly down said creek to Wyoming Highway 789; northerly along said highway to Interstate Highway 80; easterly along said highway to the city of Rawlins.

Area 87. Ferris. Beginning at the city of Rawlins; northerly along U.S. Highway 287 to Muddy Gap Junction and Wyoming Highway 220; northeasterly along said highway to the Pathfinder Road (Natrona County Road 409); southerly along said road to the Pathfinder Dam service road; southerly along said road to the North Platte River at Pathfinder Dam; southerly up said river to Interstate Highway 80; westerly along said highway to the city of Rawlins.

Area 88. Kendrick. Beginning where U.S. Highway 20-26 crosses the North Platte River in the city of Casper; southwesterly up said river to the Pathfinder Dam; northerly along the Pathfinder Dam service road to Wyoming Highway 220; westerly along said highway to the Rattlesnake Divide between Eagle Creek and Fish Creek; northerly along said divide to the Oregon Trail (Natrona County Road 319) at the top of Ryan Hill; northeasterly along said trail to the Kendrick Canal at the Iron Creek Oil Field; northerly along said canal to U.S. Highway 20-26; easterly along said highway to the North Platte River.

Area 89. Rattlesnake. Beginning where the Gas Hills Road (Natrona County Road 212) intersects U.S. Highway 20-26 at the town of Waltman; easterly along said highway to the Kendrick Canal; southerly along said canal to the Oregon Trail (Natrona County Road 319) at the Iron Creek Oil Field; southwesterly along said road to the Rattlesnake Divide at Ryan Hill; southerly along said divide between Eagle Creek and Fish Creek to Wyoming Highway 220; westerly along said highway to the Dry Creek Road (Natrona County Road 321); northwesterly along said road to the Gas Hills Road (Natrona County Road 212); northeasterly along said road to U.S. Highway 20-26 at the town of Waltman.

Area 90. Muskrat. Beginning where U.S. Highway 26 intersects the Wind River Indian Reservation boundary; easterly along said highway to the town of Waltman and the Gas Hills Road (Natrona County Road 212); southwesterly along said road to the Dry Creek Road (Natrona County Road 321); southeasterly along said road to the divide between Deer Creek and Dry Creek; southwesterly along said divide to Beaver Rim; southwesterly along said rim to the Ore Road; southerly along said road to the Beaver Rim Road (BLM Road 2401); westerly along said road to the Cedar Rim Draw Road (BLM Road 2301); southwesterly along said road to Wyoming Highway 135 (Sand Draw Road); northerly along said highway to the south boundary of the Wind River Indian Reservation; easterly and northerly along said boundary to its intersection with U.S. Highway 26.

Area 91. Popo Agie. Beginning where Wyoming Highway 28 crosses Willow Creek; northwesterly up said creek to the divide between the Sweetwater River and the Wind River at Granite Peak; northwesterly along said divide to the Continental Divide; northwesterly along said divide to the Wind River Indian Reservation boundary; easterly along said boundary to the Shoshone National Forest boundary; southeasterly along said boundary to Wyoming Highway 28; southwesterly along said highway to Willow Creek.

Area 92. Table Mountain. Beginning where U.S. Highway 287 intersects the Wind River Indian Reservation boundary; southeasterly along said highway to Wyoming Highway 28; southerly along said highway to the Shoshone National Forest boundary; northwesterly along said boundary to the Wind River Indian Reservation boundary; easterly along said boundary to U.S. Highway 287.

Area 93. Upper Sweetwater. Beginning where Wyoming Highway 28 crosses the Sweetwater River; northwesterly and northerly up said river to the divide between the Sweetwater River and the Wind River at Sweetwater Gap; southeasterly along said divide to Granite Peak and the head of Willow Creek; southeasterly down said creek to Wyoming Highway 28; southwesterly along said highway to the Sweetwater River.

Area 94. Twin Creek. Beginning where Wyoming Highway 28 intersects U.S. Highway 287 south of the city of Lander; southeasterly along U.S. Highway 287 to the Hudson-Atlantic City Road (BLM Road 2302); westerly along said road to the Fort Stambaugh Road (BLM Road 2324); westerly along said road to the Atlantic City Road (Fremont County Road 237); northerly along said road to Wyoming Highway 28; northerly along said highway to U.S. Highway 287.

Area 95. South Pass. Beginning where the Bison Basin Road (Fremont County Road and BLM Road 3221) intersects U.S. Highway 287; southerly along said road to the Cyclone Ridge Road (BLM Road 3216); westerly along said road to the Red Creek Road (BLM Road 3219); northwesterly along said road to the Sand Creek Road; westerly along said road to the Continental Divide Road north of Continental Peak; westerly along said road to the Oregon Buttes Road; northerly along said road to Wyoming Highway 28; northeasterly along said highway to the Atlantic City Road (Fremont County Road 237) at the Wyoming Department of Transportation South Pass Maintenance Shop; southerly along said road to the Fort Stambaugh Road (BLM Road 2324) at Atlantic City; easterly along said road to the Hudson-Atlantic City Road (BLM Road 2302); easterly along said road to U.S. Highway 287; southeasterly along said highway to the Bison Basin Road (Fremont County Road and BLM Road 3221).

Area 96. Green Mountain. Beginning at the town of Lamont; westerly along Wyoming Highway 73 to the Bairoil Road (Sweetwater County Road 22); westerly along said road to the Wamsutter-Crooks Gap Road (Sweetwater County Road 23); southerly along said road to the Osborne Road (BLM Road 3212); westerly along said road to the Hadsell Road (BLM Road 3217); westerly along said road to the Bison Basin Road (Fremont County Road and BLM Road 3221); northerly along said road to U.S. Highway 287; southeasterly along said highway to the town of Lamont.

Area 97. Sweetwater Rocks. Beginning at Muddy Gap Junction; northwesterly along U.S. Highway 287 to Wyoming Highway 135 (Sand Draw Road); northerly along said highway to the Cedar Rim Draw Road (BLM Road 2301); northeasterly along said road to the Beaver Rim Road (BLM Road 2401); easterly along said road to the Ore Road; northerly along said road to Beaver Rim; northeasterly along said rim to the divide between Deer Creek and Dry Creek; northeasterly along said divide to the Dry Creek Road (Natrona County Road 321); southeasterly along said road to Wyoming Highway 220; southwesterly along said highway to Muddy Gap Junction.

Area 98. Chain Lakes. Beginning at the city of Rawlins; westerly along Interstate Highway 80 to the Wamsutter-Crooks Gap Road (Sweetwater County Road 23); northerly along said road to the Bairoil Road (Sweetwater County Road 22); easterly along said road to Wyoming Highway 73; easterly along said highway to U.S. Highway 287; southerly along said highway to the city of Rawlins.

Area 100. South Wamsutter. Beginning where Wyoming Highway 789 crosses the Wyoming-Colorado state line; west along said line to the Cow Creek-Powder Wash Road north of Powder Wash, Colorado; northwesterly along said road to the Bitter Creek Road (Sweetwater County Road 19); northwesterly along said road to Interstate Highway 80; easterly along said highway to Wyoming Highway 789 at Creston Junction; southerly along said highway to the Wyoming-Colorado state line.

Area 101. Black Butte. Beginning at the junction of Wyoming Highway 430 and the Wyoming-Colorado state line; northwesterly along said highway to Interstate Highway 80 in the town of Rock Springs; easterly along said interstate to the Bitter Creek Road (Sweetwater County Road 19); southeasterly along said road to Carson Springs Junction and the Cow Creek-Powder Wash Road; southeasterly along said road to the Wyoming-Colorado state line; westerly along said line to Wyoming Highway 430.

Area 102. Aspen Mountain. Beginning where Interstate Highway 80 crosses the Green River; easterly along said highway to the town of Rock Springs and Wyoming Highway 430; southeasterly along said highway to



the Wyoming-Colorado state line; westerly along said line to the Flaming Gorge Reservoir; northerly along the east shore of said reservoir to the Green River; up the east bank of said river to Interstate Highway 80.

Area 105. Beartooth. All of the area within Wyoming north of Clark's Fork River and west of Wyoming Highway 120.

Area 106. Crandall-Sunlight. All of the drainage of Soda Butte Creek outside of Yellowstone National Park; all of the south drainage of Clark's Fork River down to and including Dead Indian Creek drainage.

Area 109. Bald Ridge. All of the drainage of Pat O'Hara Creek, Paint Creek, Trail Creek, Cottonwood Creek, Dry Creek, Newmeyer Creek and Dead Indian Gulch north of the North Fork of the Shoshone River and west of Wyoming Highway 120.

Area 110. Grinnell. All of the north and west drainage of the North Fork of the Shoshone River down to and including the drainage of Clearwater Creek; all of the south drainage of the North Fork of the Shoshone River down to the drainage of Elk Fork Creek.

Area 111. Elk Fork. All of the north drainage of the North Fork of the Shoshone River below the drainage of Clearwater Creek; all of the south drainage of the North Fork of the Shoshone River below and including Elk Fork Creek.

Area 112. Ishawooa. All of the north and west drainage of the South Fork of the Shoshone River up to the drainage of Fall Creek.

Area 113. Boulder. All of the east and south drainage of the South Fork of the Shoshone River up to the drainage of Needle Creek; all of the drainage of Sage Creek and Dry Creek west of Wyoming Highway 120; all of the drainage of Sulphur Creek.

Area 114. Wall Mountain. All of the drainage of the South Fork of the Shoshone River above and including the drainage of Fall Creek on the west side of the South Fork of the Shoshone River, and above and including the drainage of Needle Creek on the east side of the South Fork of the Shoshone River.

Area 115. Thorofare. All of the drainage of the Yellowstone River upstream from Yellowstone Lake and outside of Yellowstone National Park.

Area 116. Meeteetse. All of the Greybull and Wood River drainages off national forest west of Wyoming Highway 120.

Area 117. Franc's Peak. All of the Greybull and Wood River drainages on national forest.

Area 118. Upper Gooseberry Creek. All of the drainages of Gooseberry Creek and Little Buffalo Creek located west of Wyoming Highway 120.

Area 119. Anchor. Beginning where the divide between Gooseberry Creek and Grass Creek crosses Wyoming Highway 120; southerly along said highway to the Upper Cottonwood Creek Road (Hot Springs County Road 10); westerly then southerly along said road to the Lake Creek Road; southerly along said road to the Anchor Dam Road at Anchor Reservoir (Owl Creek Road, Hot Springs County Road 1); southerly along said road to the Wind River Indian Reservation boundary; westerly along said boundary to the divide between Owl Creek and the South Fork of the Wood River; easterly along said divide to the divide between Cottonwood Creek and Gooseberry Creek; northeasterly along said divide to the divide between Gooseberry Creek and Grass Creek; easterly along said divide to Wyoming Highway 120.

Area 120. Hamilton Dome. Beginning at the junction of the Upper Cottonwood Creek Road (Hot Springs County Road 10) and Wyoming Highway 120; southerly along said highway to the town of Thermopolis and the Broadway Street bridge over the Bighorn River; southerly up said river to the Wind River Indian Reservation boundary; westerly, northerly, then westerly along said boundary to the Anchor Dam Road at Anchor Reservoir

(Owl Creek Road-Hot Springs County Road 1); northerly and easterly along said road to the Lake Creek Road; northeasterly along said road to the Upper Cottonwood Creek Road (Hot Springs County Road 10); easterly along said road to Wyoming Highway 120; in addition, all non-Indian fee title lands in that portion of Hot Springs County within the exterior boundaries of the Wind River Indian Reservation.

Area 121. Heart Mountain. All of the north drainage of the Shoshone River east of Wyoming Highway 120 and west of Wyoming Highway 295; all of the drainage of the Clark's Fork River east of Wyoming Highway 120 and west of Wyoming Highway 295 and Elk Basin Road.

Area 122. Shoshone River. Beginning where the Elk Basin Road (Wyoming Highway 295) crosses the Wyoming-Montana state line; easterly along said line to the Bighorn River; southerly up said river to Horseshoe Bend boat ramp; westerly along the Horseshoe Bend Road to Wyoming Highway 37; southerly along said highway to U.S. Highway 14A; easterly along said highway to the Bighorn River; southerly up said river to Stucco (WyoBen Bentonite Plant); from Stucco south to BLM Road 1138; northwesterly along said road to U.S. Highway 310; northerly along said highway to the divide between the Shoshone River and Dry Creek; southwestwesterly along said divide to the Park-Big Horn county line; southerly along said line to U.S. Highway 14-16-20; westerly along said highway to the town of Cody and the Shoshone River; northeasterly down said river to the Willwood Road (Wyoming Highway 295); northerly along said highway to the Wyoming-Montana state line.

Area 123. Yellowtail. Beginning at the Horseshoe Bend boat ramp on the Bighorn River; southerly up said river to U.S. Highway 14A; westerly along said highway to Wyoming Highway 37; northerly along said highway to the Horseshoe Bend Road; easterly along said road to the Horseshoe Bend boat ramp.

Area 124. Emblem. Beginning in the town of Greybull; southerly along U.S. Highway 16-20 to the divide between Antelope Creek and Elk Creek; westerly along said divide to the divide between Elk Creek and Dorsey Creek; westerly along said divide to the divide between Fifteen Mile Creek and the Greybull River; westerly along said divide to Fenton Pass and the Fenton Pass Road (BLM Road 1222); northerly along said road to Bighorn County Lane 40 1/2 (becomes Park County Road 3XQ); southwestwesterly along said road to the Roach Gulch Road; southwestwesterly along said road to Roach Gulch Reservoir; southerly along the west shore of said reservoir to the Roach Gulch intake canal; westerly along said canal to Renner Ranch Lane; northerly along said lane to the Coyote Canyon Road (Park County Road 3SL); northwesterly along said road to the Greybull River Road (Park County Road 3LE); northeasterly along said road to the Park-Bighorn county line; northerly along said line to the divide between Dry Creek and the Shoshone River; northeasterly along said divide to U.S. Highway 310 (Wyoming Highway 789); southerly along said highway to BLM Road 1138; southeasterly along said road to Stucco (WyoBen Bentonite Plant) and the Big Horn River; southerly up said river to the town of Greybull.

Area 125. Fifteen Mile. Beginning where Wyoming Highway 120 crosses the divide between the Greybull River and Fifteen Mile Creek; northerly and easterly along said divide to the divide between Dorsey Creek and Elk Creek; easterly along said divide to the divide between Elk Creek and Antelope Creek; easterly along said divide to U.S. Highway 16-20; southerly then easterly along said highway to its junction with the Big Horn Canal three (3) miles west of Manderson; southerly along said canal to its junction with Wyoming Highway 20-U.S. Highway 789 three quarters of a mile south of Worland; southwestwesterly along said highway to Tie Down Gulch; westerly along said gulch to the divide between Cottonwood Creek and Gooseberry Creek; westerly along said divide to the divide between Gooseberry Creek and Grass Creek; westerly along said divide to Wyoming Highway 120; northwesterly along said highway to the divide between the Greybull River and Fifteen Mile Creek.

Area 127. Cottonwood. Beginning where Wyoming Highway 120 crosses the divide between Gooseberry Creek and Grass Creek; easterly along said divide to the divide between Gooseberry Creek and Cottonwood Creek; easterly along said divide to Tie Down Gulch; easterly down said gulch to the Big Horn River; southerly up said river to the Broadway Street bridge at the town of Thermopolis; westerly along said street to Wyoming Highway 120; northwesterly along said highway to the divide between Gooseberry Creek and Cottonwood Creek.

Area 128. Wind River. All of the drainage of the Wind River west of the west boundary of the Wind River Indian Reservation and those areas of the Spence and Moriarty Wildlife Habitat Management Area that lie east of the East Fork of the Wind River.

Area 130. Big Sandy. Beginning at the town of Farson and U.S. Highway 191; northerly along said highway to the Big Sandy Reservoir Road (Sweetwater County Road 28); easterly along said road to the Big Sandy River at the Big Sandy Reservoir dam; northerly up said river to the Continental Divide; southeasterly along said divide to Mt. Nystrom; easterly from Mt. Nystrom to Sweetwater Gap and the headwaters of the Sweetwater River; southerly down said river to Wyoming Highway 28; southwesterly along said highway to U.S. Highway 191 at the town of Farson.

Area 131. Steamboat. Beginning at the junction of Interstate Highway 80 and Wyoming Highway 372; northwesterly along Wyoming Highway 372 to the Fontenelle Dam Road (Lincoln County Road 313); northerly then easterly along said road to the County Line Road (Sweetwater County Road 52); southerly along said road to the Eighteen Mile Road (Sweetwater County Road 49); northeasterly along said road to U.S. Highway 191; southerly along said highway to U.S. Highway 28; northeasterly along said highway to the Oregon Buttes Road (Sweetwater County Road 74); southerly along said road to the Continental Divide Road; northerly along said road to the Sand Creek Road; easterly along said road to the Red Creek Road (BLM Road 3219); southeasterly along said road to the Cyclone Ridge Road (BLM Road 3216); easterly along said road to the Bison Basin Road (BLM Road 3221); southerly along said road to the Hadsell Road (BLM Road 3217); easterly along said road to the Osborne Road (BLM Road 3212); easterly along said road to the Wamsutter-Crooks Gap Road (Sweetwater County Road 23); southerly along said road to Interstate Highway 80; westerly along said highway to Wyoming Highway 372.

Area 132. Cedar Mountain. Beginning where the Flaming Gorge Reservoir crosses the Wyoming-Utah state line; west along said line to the Stateline Dam Road (U.S.F.S. Road 072, Uinta County Road 283); northerly along said road to Wyoming Highway 410; northerly along said road to Interstate Highway 80; easterly along said highway to the Green River; southerly down the east bank of said river to Flaming Gorge Reservoir; southerly along the east shore of said reservoir to the Wyoming-Utah state line.

Area 133. Uinta. Beginning where Interstate Highway 80 crosses the Wyoming-Utah state line; easterly along said highway to Wyoming Highway 414; southerly along said highway to Wyoming Highway 410 at the town of Mountain View; southerly along said highway to the Stateline Dam Road (U.S.F.S. Road 072, Uinta County Road 283); southerly along said road to the Wyoming-Utah state line; westerly then northerly along said line to Interstate Highway 80.

Area 134. Bear River Divide. Beginning where Wyoming Highway 89 crosses the Wyoming-Utah state line west of Sage Junction; northeasterly along said highway to Wyoming U.S. Highway 30; easterly then southerly along said highway to Interstate Highway 80; westerly along said highway to Wyoming Highway 412; northwesterly along said highway to U.S. Highway 189; southerly along said highway to Muddy Creek; westerly along said creek to the Amoco Sulfur Haul Road; southerly then westerly along said road to the Whitney Canyon Road; westerly along said road to Uinta County Road 103; southerly along said road to Wyoming Highway 89; northerly along said highway to the Wyoming-Utah state line; northerly along said line to Wyoming Highway 89.

Area 135. West Green River. Beginning at the junction of Wyoming Highway 372 and Interstate Highway 80; westerly along said interstate highway to U.S. Highway 30; northwesterly along said highway to Sage Junction and Wyoming Highway 89; southwesterly along said highway to the Wyoming-Utah state line; northerly along said line to the Wyoming-Idaho state line; northerly along said line to the divide between the Salt River and Bear River; easterly along said divide to the divide between the Salt River and Smith's Fork; northeasterly along said divide to Commissary Ridge; southeasterly along said ridge to the head of LaBarge Creek; southeasterly down said creek to the Green River; southeasterly along said river to Fontenelle Dam and the Fontenelle Dam Road (Lincoln County Road 313); westerly along said road to Lincoln County Road 316; southerly along said road to Wyoming Highway 372; southeasterly along said highway to Interstate Highway 80.

Area 138. Boulder. Beginning at the Fontenelle Dam on the Green River; northerly up said river to Wyoming Highway 351; easterly along said highway to the New Fork River; northerly up said river to Boulder Creek; easterly up said creek to the middle fork of Boulder Creek; easterly up said creek to the Continental Divide; southerly along said divide to the Big Sandy River; southerly down said river to the Big Sandy Reservoir Road (Sweetwater County Road 28); westerly along said road to U.S. Highway 191; southerly along said highway to the 18 Mile Road (Sweetwater County Road 49); southwesterly along said road to the County Line Road (Sweetwater

County Road 52); northerly along said road to the Fontenelle Dam Road (Lincoln County Road 313); westerly along said road to Fontenelle Dam and the Green River.

Area 139. Pinedale. Beginning where the East Green River Road (Sublette County Road 23-110) intersects Wyoming Highway 351; northerly along said highway to Cora Junction and U.S. Highway 191; easterly along said highway to Pine Creek; northerly up said creek to Summit Lake; easterly to Mt. Helen and the Continental Divide; southerly along said divide to the Middle Fork of Boulder Creek; westerly down said creek to Boulder Creek; westerly down said creek to the New Fork River; southerly down said river to Wyoming Highway 351; westerly along said highway to the East Green River Road (Sublette County Road 23-110).

Area 140. New Fork. Beginning where U.S. Highway 191 crosses Pine Creek in the town of Pinedale; westerly and northerly along said highway to the Green River at Warren Bridge; northerly up said river to Jim Creek; easterly up said creek to the divide between the New Fork River and the Green River; southerly along said divide to the divide between the Green River and Pine Creek; southeasterly along said divide to Summit Lake and the head of Pine Creek; southerly down said creek to U.S. Highway 191.

Area 141. Green River. Beginning where Tosi Creek enters the Green River; westerly up said creek to the Union Pass Road (U.S.F.S. Road 600); northerly and easterly along said road to the Continental Divide; southerly along said divide to Mt. Helen; westerly to Summit Lake and the divide between the Green River and Pine Creek; northwesterly along said divide to the divide between the Green River and the New Fork River; northerly along said divide to the head of Jim Creek; westerly down said creek to the Green River; northerly up said river to Tosi Creek.

Area 142. Piney-Horse Creek. Beginning where the East Green River Road (Sublette County Road 23-110) intersects Wyoming Highway 351; westerly along said road to the Green River; northerly up said river to Cottonwood Creek; westerly up said creek to South Cottonwood Creek; westerly up said creek to the South Fork of South Cottonwood Creek; westerly up said creek to the divide between the Green River and the Greys River; northerly along said divide to the divide between the Hoback River and the Green River; easterly along said divide to U.S. Highway 191 at Hoback Rim; southerly along said highway to the East Green River Road (Sublette County Road 23-110) at Cora Junction; southerly along said road to Wyoming Highway 351.

Area 143. South Piney. Beginning where LaBarge Creek enters the Green River; westerly up said creek to the divide between the Green River and Greys River; northerly along said divide to the head of the South Fork of South Cottonwood Creek; easterly down said creek to South Cottonwood Creek; easterly down said creek to Cottonwood Creek; easterly down said creek to the Green River; southerly down said river to LaBarge Creek.

Area 144. Greys River. Beginning at the confluence of Greys River and the Snake River; easterly up the Snake River to Bailey Creek; southerly up said creek to Dry Wash Draw; easterly up said draw to the top of the Greyback Ridge; southerly along said ridge to the divide between the Greys River and the Green River; southerly, westerly and northerly along said divide to the divide between the Greys River and Smith Fork Creek; northerly and westerly along said divide to the divide between the Greys River and Salt River; northerly along said divide to the ridge between Squaw Creek and the Greys River; northeasterly along said ridge to the confluence of Squaw Creek and the Greys River; westerly down said river to the Snake River.

Area 145. Salt River. Beginning at the Wyoming-Idaho state line on the Snake River; easterly up said river to the Greys River; easterly up said river to the confluence of the Greys River and Squaw Creek; southwesterly from said confluence to the ridge between Squaw Creek and the Greys River; southerly up said ridge to the divide between the Greys River and the Salt River; southerly along said divide to the divide between the Bear River and the Salt River; westerly along said divide to the Wyoming-Idaho state line; northerly along said line to the Snake River.

Area 146. Fish Creek. Beginning where Kinky Creek enters the Gros Ventre River; northerly down said river to Fish Creek; northerly up said creek to the North Fork of Fish Creek; northerly up said creek to the Moccasin Basin Road (U.S.F.S. Road 30750) at Calf Creek; northerly up said road to the Continental Divide; southerly along said divide to the Union Pass Road (U.S.F.S. Road 600); southerly along said road to the Darwin Ranch Road (U.S.F.S. Road 620); westerly along said road to Kinky Creek; westerly down said creek to the Gros Ventre River.

Area 148. Teton. Beginning where U.S. Highway 26-287 crosses the Grand Teton National Park boundary east of Moran; northerly along said boundary to the Targhee National Forest boundary at the northwest corner of the park; northerly along said boundary to the Yellowstone National Park boundary; easterly along said boundary to the Continental Divide; southerly and easterly along said divide to Togwotee Pass and U.S. Highway 26-287; westerly along said highway to the Grand Teton National Park boundary.

Area 149. Targhee. Beginning where Wyoming Highway 22 crosses the Wyoming-Idaho state line; northerly along said line to the southern boundary of Yellowstone National Park; easterly along said boundary to the Targhee National Forest boundary; southerly along said boundary to Teton Pass and Wyoming Highway 22; westerly along said highway to the Wyoming-Idaho state line.

Area 150. Wilson. Beginning where the Targhee National Forest boundary crosses Wyoming Highway 22 at Teton Pass; northerly along said boundary to the Grand Teton National Park boundary; northerly and southerly along said boundary to U.S. Highway 191; southerly along said highway to its junction with Wyoming Highway 22; westerly along said highway to Teton Pass.

Area 151. Fall Creek. Beginning where Wyoming Highway 22 crosses the Snake River; southerly and westerly down said river to the Wyoming-Idaho state line; northerly along said line to Wyoming Highway 22; easterly along said highway to the Snake River.

Area 152. Lower Hoback. Beginning where U.S. Highway 191 crosses Flat Creek at the north edge of the town of Jackson; due east to the National Elk Refuge boundary; easterly along said boundary to the Bridger-Teton National Forest boundary and the ridge between Twin Creeks and Cache Creek; easterly along said ridge to Jackson Peak; southerly along the divide between Flat Creek and Cache Creek to Cache Peak; easterly along the divide between Flat Creek and Granite Creek to Pyramid Peak; southerly along the divide between the Gros Ventre River and the Hoback River to Steamboat Peak; southerly and westerly along the divide between Shoal Creek and Dell Creek to the Riling Draw road; southerly along said road to the Dell Creek Road; westerly along said road to the Hoback River; westerly down said river to Cliff Creek; southerly up Cliff Creek to the divide between the Greys River and the Hoback River; northwesterly along said divide to the divide between the Greys River and Willow Creek; northerly along said divide to the divide between Willow Creek and Bailey Creek (Greyback Ridge); northerly along said divide to Dry Wash Draw; westerly down said draw to Bailey Creek; northwesterly down said creek to the Snake River; northerly up said river to Wyoming Highway 22; easterly along said highway to U.S. Highway 191; easterly along said highway to Flat Creek at the north edge of the town of Jackson.

Area 153. Monument Ridge. Beginning at the head of Cliff Creek; northerly down said creek to the Hoback River; southerly up said river to the South Fork of the Hoback River; easterly to the Hoback Rim and the divide between the Hoback River and the Green River; southwesterly along said divide to the divide between the Hoback River and the Greys River; northerly along said divide to the head of Cliff Creek.

Area 154. Raspberry Ridge. Beginning where U.S. Highway 191 crosses the divide between the Green River and the Hoback River on the Hoback Rim; southwestward along said divide to a point due east of the confluence of the South Fork of the Hoback River and the Hoback River; due west to the Hoback River; northerly down said river to the Dell Creek road; easterly along said road to the Riling Draw Road; northerly along said road to the divide between Shoal Creek and Dell Creek; northeasterly along said divide to the divide between the Gros Ventre River and the Hoback River at Steamboat Peak; southeasterly along said divide to the divide between the Green River and the Hoback River at Hodges Peak; southerly along said divide to U.S. Highway 191.

Area 155. Crystal Peak. Beginning at the National Elk Refuge boundary at the north edge of the town of Jackson; northeasterly along said boundary to the Gros Ventre River; easterly up said river to Kinky Creek; easterly up said creek to the Darwin Ranch Road (U.S.F.S. Road 620); easterly along said road to the divide between the Gros Ventre River and the Green River; southwesterly along said divide to the divide between the Gros Ventre River and the Hoback River at Hodges Peak; westerly along said divide to the divide between Granite Creek and Flat Creek at Pyramid Peak; westerly along said divide to the divide between Flat Creek and Cache Creek at Cache Peak; northerly along said divide to the divide between Twin Creeks and Cache Creek at Jackson Peak; westerly along said divide to the National Elk Refuge boundary; westerly along said boundary to the town of Jackson.

Area 156. Spread Creek. Beginning where the Grand Teton National Park boundary crosses the Gros Ventre River; northerly along said boundary to U.S. Highway 26-287; easterly along said highway to Togwotee Pass and the Continental Divide; southerly along said divide to the Moccasin Basin Road (U.S.F.S. Road 30750); southerly down said road to the North Fork of Fish Creek at Calf Creek; southerly down said creek to Fish Creek; southwesterly down said creek to the Gros Ventre River; westerly down said river to the Grand Teton National Park boundary.

Area 157. Boysen. All lands within the Bureau of Reclamation's Riverton and Boysen Unit boundaries and those lands within Boysen State Park south of Cottonwood Creek and west of Boysen Reservoir and those lands within Boysen State Park south of U.S. Highway 20-26.

Area 158. Ormsby. Beginning where Interstate Highway 25 crosses the North Platte River in the city of Casper; northerly along said highway to Wyoming Highway 259; northerly along said highway to the town of Midwest and Wyoming Highway 387; northeasterly along said highway to the Ross Road (in Converse County, County Road 31); southeasterly along said road to the Blizzard Heights-Sage Creek Divide Road; westerly along said road to 55 Ranch Road (Converse County Road 23); southerly along said road to Wyoming Highway 95; southwesterly along said highway to the North Platte River; westerly up said river to Interstate Highway 25 in the city of Casper.

Area 160. Beaver Creek. Beginning where U.S. Highway 287 intersects the south boundary of the Wind River Indian Reservation; easterly along said boundary to Wyoming Highway 135 (Sand Draw Road); southerly along said highway to U.S. Highway 287; northwesterly along said highway to the south boundary of the Wind River Indian Reservation.

Area 161. St. Mary's Creek. Beginning on Wyoming Highway 72 at the town of Hanna on Wyoming Highway 72; southerly along said highway to U.S. Highway 30; westerly along said highway to Interstate Highway 80 at Walcott; westerly along said highway to the North Platte River; northerly down said river to the Medicine Bow River; easterly up said river to the Hanna-Leo Road (Carbon County Road 291); southerly along said road to Wyoming Highway 72 at the town of Hanna.

Area 162. Water Dog Lakes. Beginning where U.S. Highway 191 crosses the Green River at Warren Bridge; northwesterly along said highway to the divide between the Hoback River and the Green River (Hoback Rim); northerly along said divide to the divide between the Green River and the Gros Ventre River at Hodges Peak; northeasterly along said divide to the Darwin Ranch Road (U.S.F.S. Road 620); easterly along said road to the Union Pass Road (U.S.F.S. Road 600); southerly and easterly along said road to Tosi Creek; easterly down said creek to the Green River; southerly down said river to U.S. Highway 191.

Area 163. Middle Fork. Beginning at the junction of the Barnum Mountain Road and the Outlaw Cave Access Road west of the town of Barnum; southerly along the Outlaw Cave Access Road to the Middle Fork of the Powder River; easterly down said river to Buffalo Creek; southerly down said creek to the 33 Mile Road (Natrona County Road 110); northwesterly along said road to the Hazelton Road (Washakie County Road 81); northerly along said road to the Barnum Mountain Road; easterly along said road to the Outlaw Cave Access Road.

Area 164. Nowater. Beginning at the junction of U.S. Highway 16 and Bluebank Road (BLM Road 1411); southerly along said road to the Nowater Stock Drive Road; westerly along said road to the Mud Creek Road; southerly along said road to the divide between Nowater Creek and Kirby Creek; westerly along said divide to the head of Walter's Draw; westerly down said draw to the Big Horn River; northerly down said river to Tie Down Gulch; northwesterly up said gulch to U.S. Highway 20; northeasterly along said highway to U.S. Highway 16; easterly along said highway to the Bluebank Road.

Area 165. YU Bench. Beginning at the junction of Wyoming Highway 120 and U.S. Highway 14-16-20; easterly along said highway to the Park-Bighorn County line; southerly along said line to the Greybull River Road (Park County Road 3LE); southwesterly along said road to the Coyote Canyon Road (Park County Road 3SL); southeasterly along said road to Renner Ranch Lane; southerly along said lane to the Roach Gulch intake canal; easterly along said canal to Roach Gulch Reservoir; northerly along the west shore of said reservoir to the Roach Gulch Road; northeasterly along said road to Park County Road 3XQ (becomes Big Horn County Lane 40 ½);

northeasterly along said road to the Fenton Pass Road (BLM Road 1222); southerly along said road to the divide between the Greybull River and Fifteen Mile Creek; southwesterly along said divide to Wyoming Highway 120; northwesterly along said highway to U. S. Highway 14-16-20.

Area 167. Dull Center. Beginning at the intersection of Wyoming Highway 59 and the Steckley Road (U.S.F.S. Road 942); easterly along said road to the North Antelope Road (U.S.F.S. Road 949); easterly and southerly along said road to the Rochelle Hills Road (U.S.F.S. Road 933); easterly and southerly along said road to the Dull Center Road (Converse County Road 38); easterly along said road to the Converse-Niobrara county line and the North Lance Creek Road; easterly and southerly along said road to the Cow Creek Road; southerly along said road to the Tillard Ranch-Cow Creek Road; westerly along said road to the Converse-Niobrara county line and the Tillard Ranch Road; westerly along said road to the Cow Creek Road (Converse County Road 45); southerly along said road to the Converse-Niobrara county line and the Cow Creek-Walker Creek Interconnect Road; southerly along said road to its junction with the Walker Creek Road (Converse County Road 43) at the Converse-Niobrara county line; westerly along said road to Dry Creek; westerly up said creek to the Iberlin Ranch Road; northerly along said road to the Thunder Basin National Grassland and U.S.F.S. Road 958C; northwesterly along said road to the East Bill Road (U.S.F.S. Road 958); westerly along said road to the Dull Center Road (Converse County Road 38); westerly along said road to Wyoming Highway 59; northerly along said highway to the Steckley Road.

Area 168. Medicine Butte. Beginning where Interstate Highway 80 crosses the Wyoming-Utah state line; northerly along said line to Wyoming Highway 89; southeasterly along said highway to its junction with Uinta County Road 103; northerly along said road to the Whitney Canyon Road; easterly along said road to the Amoco Sulfur Haul Road; easterly then northerly along said road to Muddy Creek; easterly down said creek to U.S. Highway 189; northerly along said highway to Wyoming Highway 412; southeasterly along said highway to Interstate Highway 80; westerly along said highway to the Wyoming-Utah state line.

Area 169. Tisdale Mountain. Beginning where Interstate Highway 25 crosses the South Fork of the Powder River; southeasterly along said highway to the Midwest interchange and the Smoky Gap Road (Natrona County Road 115); westerly along said road to the Dead Horse Road (Natrona County Road 114); southwesterly along said road to the Wild Horse Trail Road (Natrona County Road 113); westerly along said road to the 33 Mile Road (Natrona County Road 110); northwesterly along said road to the Willow Creek Road (Natrona County Road 111); northeasterly along said road to the Lone Bear Road (Natrona County Road 112); southerly along said road to Willow Creek; northwesterly down said creek to the South Fork of the Powder River; northerly down said river to Interstate 25.

Area 170. Riverview. All non-Indian owned fee title lands within the following described area: Beginning where Wyoming Highway 789 crosses the Big Wind River near the City of Riverton; northwesterly up said river to Diversion Dam and the southern Riverton Reclamation Unit boundary; easterly, southerly, and northeasterly along said boundary to the Boysen State Park boundary south of Wyoming Highway 789; southerly, easterly, then northerly along said boundary to the eastern boundary of the Wind River Indian Reservation; southerly, then westerly along said boundary to Wyoming Highway 135; northwesterly along said highway to Wyoming Highway 136; northwesterly along said highway to Wyoming Highway 789; northwesterly along said highway to the Big Wind River near the City of Riverton.

Area 171. Crowheart Butte. All non-Indian owned fee title lands within the exterior boundaries of the Wind River Indian Reservation; excluding Deer Hunt Areas 157 and 170, those areas of the Spence and Moriarity Wildlife Management Area that lie east of the East Fork of the Wind River, and those lands within Hot Springs County.

#### WYOMING GAME AND FISH COMMISSION

By:

Bill Williams, DVM, President

Dated: April 24, 2007

# 2007 DEER HUNT AREAS

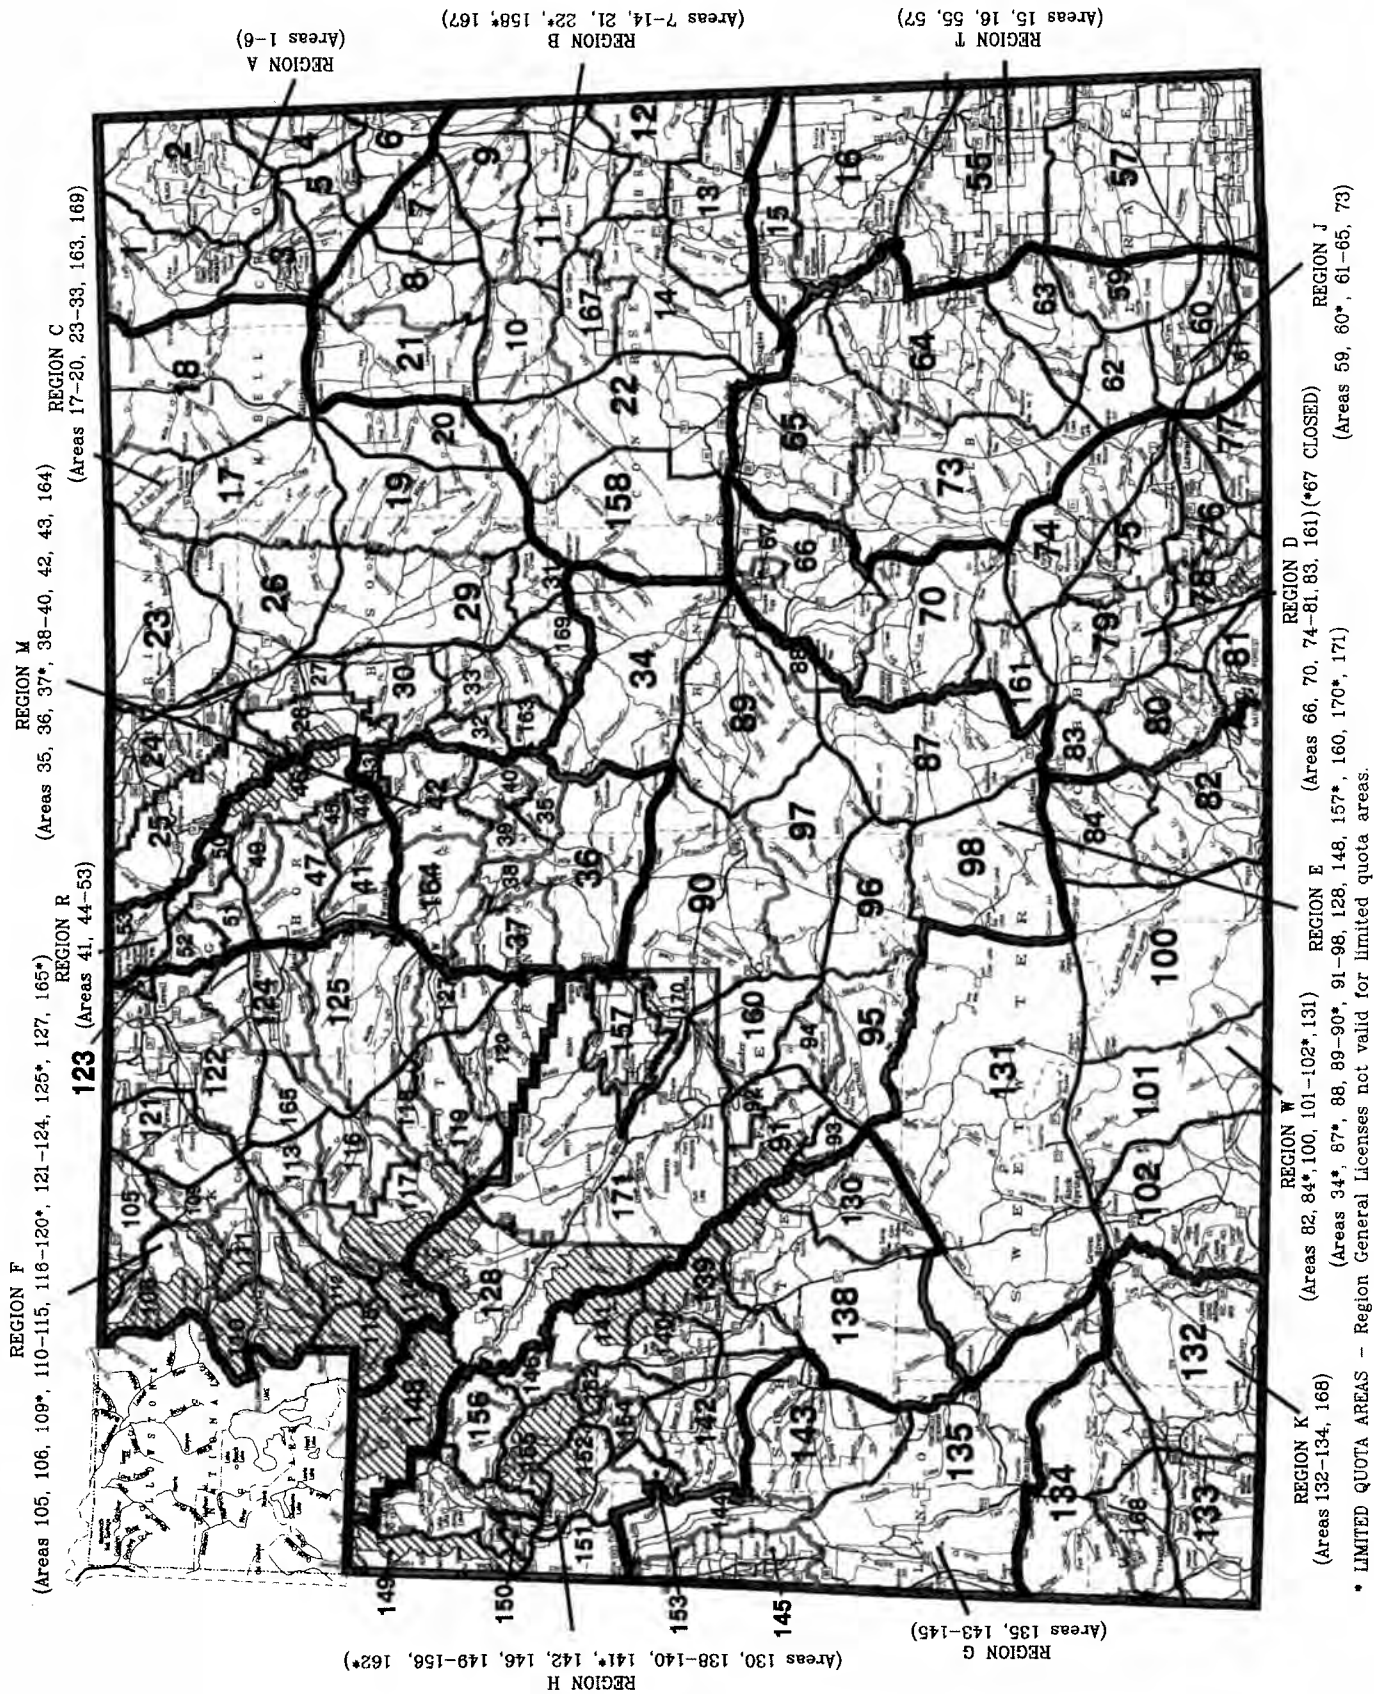

THIS MAP IS FOR GENERAL REFERENCE ONLY. Please use the written boundary descriptions in this regulation for detailed boundary information.



TABLE I  
ELK  
HARVEST STATEWIDE  
BY TOTAL HUNTERS  
2007

|             | LICENSES<br>SOLD | NUMBER<br>ACTIVE<br>HUNTERS | HARVEST |       |       |       |        | TOTAL<br>RECREATION<br>DAYS | HUNTER<br>SUCCESS | DAYS/<br>HARVEST |
|-------------|------------------|-----------------------------|---------|-------|-------|-------|--------|-----------------------------|-------------------|------------------|
|             |                  |                             | BULL    | SPIKE | COW   | CALF  | TOTAL  |                             |                   |                  |
| STATE TOTAL | 59,763           | 52,151                      | 9,597   | 1,943 | 9,123 | 1,860 | 22,523 | 387,973                     | 43.2%             | 17.2             |
| RESIDENT    | 49,419           | 42,575                      | 6,826   | 1,693 | 7,564 | 1,598 | 17,681 | 330,126                     | 41.5%             | 18.7             |
| NONRESIDENT | 10,344           | 9,576                       | 2,771   | 250   | 1,559 | 262   | 4,842  | 57,847                      | 50.6%             | 11.9             |

TABLE II  
ELK  
TEN-YEAR COMPARISON OF HARVEST BY TOTAL HUNTERS  
1998–2007

| YEAR    | 1998   | 1999   | 2000   | 2001   | 2002   | 2003   | 2004   | 2005   | 2006   | 2007   |
|---------|--------|--------|--------|--------|--------|--------|--------|--------|--------|--------|
| HARVEST | 22,586 | 21,830 | 23,727 | 22,772 | 21,462 | 21,365 | 21,252 | 19,708 | 21,680 | 22,523 |

ELK  
HARVEST BY HARVEST TOOL  
2007

|                  |                   |                        |
|------------------|-------------------|------------------------|
| ARCHERY<br>8.20% | FIREARM<br>91.41% | MUZZLE LOADER<br>0.38% |
|------------------|-------------------|------------------------|

TABLE I-A  
ELK  
HARVEST, HUNTING PRESSURE, HUNTER SUCCESS  
BY HUNT AREA  
2007

| AREA<br>(cross hunt areas) | TYPE               | ACTIVE<br>LICS/HTRS | HARVEST |       |     |      |       | HUNTER<br>SUCCESS | DAYS/<br>HARVEST | HUNTER<br>DAYS | LICENSES                      |
|----------------------------|--------------------|---------------------|---------|-------|-----|------|-------|-------------------|------------------|----------------|-------------------------------|
|                            |                    |                     | BULL    | SPIKE | COW | CALF | TOTAL |                   |                  |                | SOLD<br>(cross hunt<br>incl.) |
|                            |                    |                     |         |       |     |      |       |                   |                  |                |                               |
| 1 Black Hills              | Limited 1          | 149                 | 46      | 12    | 16  | 3    | 77    | 51.7%             | 20.4             | 1570           | 152                           |
|                            | Limited 2          | 103                 | 0       | 0     | 45  | 10   | 55    | 53.4%             | 16.5             | 906            | 105                           |
|                            | Pooled Total       | 252                 | 46      | 12    | 61  | 13   | 132   | 52.4%             | 18.8             | 2476           |                               |
|                            | Pooled Resident    | 205                 | 34      | 12    | 47  | 9    | 102   | 49.8%             | 19.7             | 2007           |                               |
|                            | Pooled Nonresident | 47                  | 12      | 0     | 14  | 4    | 30    | 63.8%             | 15.6             | 469            |                               |
|                            |                    |                     |         |       |     |      |       |                   |                  |                |                               |
| 2 Fortification            | Limited 1          | 36                  | 13      | 2     | 0   | 0    | 15    | 41.7%             | 11.8             | 177            | 38                            |
|                            | Limited 2          | 33                  | 0       | 0     | 9   | 0    | 9     | 27.3%             | 16.3             | 147            | 35                            |
|                            | Limited 6          | 38                  | 0       | 0     | 17  | 1    | 18    | 47.4%             | 6.4              | 115            | 40                            |
|                            | Pooled Total       | 104                 | 13      | 2     | 26  | 1    | 42    | 40.4%             | 10.5             | 439            |                               |
|                            | Pooled Resident    | 93                  | 10      | 2     | 26  | 0    | 38    | 40.9%             | 10.2             | 388            |                               |
|                            | Pooled Nonresident | 11                  | 3       | 0     | 0   | 1    | 4     | 36.4%             | 12.8             | 51             |                               |
|                            |                    |                     |         |       |     |      |       |                   |                  |                |                               |
| 3 Rawhide                  | Limited 1          | 50                  | 27      | 3     | 5   | 0    | 35    | 70.0%             | 11.4             | 398            | 51                            |
|                            | Limited 2          | 36                  | 0       | 0     | 4   | 4    | 8     | 22.2%             | 77.8             | 622            | 50                            |
|                            | Limited 6          | 41                  | 0       | 0     | 15  | 7    | 22    | 53.7%             | 24.3             | 535            | 50                            |
|                            | Pooled Total       | 114                 | 27      | 3     | 24  | 11   | 65    | 57.0%             | 23.9             | 1555           |                               |
|                            | Pooled Resident    | 103                 | 21      | 3     | 23  | 11   | 58    | 56.3%             | 25.9             | 1505           |                               |
|                            | Pooled Nonresident | 11                  | 6       | 0     | 1   | 0    | 7     | 63.6%             | 7.1              | 50             |                               |
|                            |                    |                     |         |       |     |      |       |                   |                  |                |                               |
| 5 Iron Mountain            | Limited 1          | 224                 | 93      | 11    | 23  | 0    | 127   | 56.7%             | 9.1              | 1159           | 255                           |
|                            | Limited 6          | 172                 | 0       | 0     | 82  | 4    | 86    | 50.0%             | 12.0             | 1031           | 226                           |
|                            | Pooled Total       | 393                 | 93      | 11    | 105 | 4    | 213   | 54.2%             | 10.3             | 2190           |                               |
|                            | Pooled Resident    | 308                 | 57      | 11    | 82  | 4    | 154   | 50.0%             | 12.0             | 1853           |                               |
|                            | Pooled Nonresident | 85                  | 36      | 0     | 23  | 0    | 59    | 69.4%             | 5.7              | 337            |                               |
|                            |                    |                     |         |       |     |      |       |                   |                  |                |                               |
| 6 Pole Mountain            | Limited 1          | 159                 | 56      | 3     | 13  | 0    | 72    | 45.3%             | 19.9             | 1435           | 163                           |
|                            | Limited 2          | 78                  | 0       | 0     | 44  | 3    | 47    | 60.3%             | 13.9             | 654            | 100                           |
|                            | Limited 6          | 81                  | 0       | 0     | 35  | 6    | 41    | 50.6%             | 17.6             | 720            | 100                           |
|                            | Pooled Total       | 298                 | 56      | 3     | 92  | 9    | 160   | 53.7%             | 17.6             | 2809           |                               |
|                            | Pooled Resident    | 251                 | 35      | 3     | 75  | 9    | 122   | 48.6%             | 20.1             | 2447           |                               |
|                            | Pooled Nonresident | 47                  | 21      | 0     | 17  | 0    | 38    | 80.9%             | 9.5              | 362            |                               |
|                            |                    |                     |         |       |     |      |       |                   |                  |                |                               |
| 7 Laramie Peak             | Limited 1          | 1331                | 637     | 83    | 98  | 0    | 818   | 61.5%             | 11.5             | 9445           | 1509                          |
|                            | Limited 2          | 984                 | 0       | 0     | 390 | 170  | 560   | 56.9%             | 14.2             | 7927           | 1002                          |
|                            | Limited 3          | 387                 | 0       | 0     | 180 | 34   | 214   | 55.3%             | 11.1             | 2371           | 473                           |
|                            | Limited 5          | 45                  | 0       | 0     | 23  | 6    | 29    | 64.4%             | 8.7              | 252            | 100                           |
|                            | Limited 6          | 400                 | 0       | 0     | 161 | 62   | 223   | 55.8%             | 14.2             | 3160           | 500                           |
|                            | Limited 7          | 80                  | 0       | 0     | 37  | 10   | 47    | 58.8%             | 11.1             | 521            | 102                           |
|                            | Pooled Total       | 3082                | 637     | 83    | 889 | 282  | 1891  | 61.4%             | 12.5             | 23676          |                               |
|                            | Pooled Resident    | 2637                | 538     | 83    | 764 | 246  | 1631  | 61.9%             | 13.0             | 21249          |                               |
|                            | Pooled Nonresident | 445                 | 99      | 0     | 125 | 36   | 260   | 58.4%             | 9.3              | 2427           |                               |
|                            |                    |                     |         |       |     |      |       |                   |                  |                |                               |
| 8 Boulder Ridge            | Limited 1          | 107                 | 15      | 7     | 30  | 4    | 56    | 52.3%             | 12.2             | 684            | 126                           |
|                            | Pooled Total       | 107                 | 15      | 7     | 30  | 4    | 56    | 52.3%             | 12.2             | 684            |                               |
|                            | Pooled Resident    | 93                  | 12      | 4     | 27  | 4    | 47    | 50.5%             | 13.2             | 619            |                               |
|                            | Pooled Nonresident | 14                  | 3       | 3     | 3   | 0    | 9     | 64.3%             | 7.2              | 65             |                               |
|                            |                    |                     |         |       |     |      |       |                   |                  |                |                               |
| 9 South Snowy Range        | General            | 848                 | 100     | 14    | 26  | 6    | 146   | 17.2%             | 33.7             | 4927           |                               |
|                            | Pooled Total       | 848                 | 100     | 14    | 26  | 6    | 146   | 17.2%             | 33.7             | 4927           |                               |
|                            | Pooled Resident    | 796                 | 80      | 14    | 23  | 6    | 123   | 15.5%             | 37.6             | 4622           |                               |
|                            | Pooled Nonresident | 52                  | 20      | 0     | 3   | 0    | 23    | 44.2%             | 13.3             | 305            |                               |

TABLE I-A (Continued)  
ELK HUNT AREA REPORT

| AREA<br>(cross hunt areas) | TYPE               | ACTIVE<br>LICS/HTRS | HARVEST |       |     |      |       | HUNTER<br>SUCCESS | DAYS/<br>HARVEST | HUNTER<br>DAYS | LICENSES<br>SOLD      |
|----------------------------|--------------------|---------------------|---------|-------|-----|------|-------|-------------------|------------------|----------------|-----------------------|
|                            |                    |                     | BULL    | SPIKE | COW | CALF | TOTAL |                   |                  |                | (cross hunt<br>incl.) |
|                            |                    |                     |         |       |     |      |       |                   |                  |                |                       |
| 10 Rock Creek              |                    |                     |         |       |     |      |       |                   |                  |                |                       |
|                            | Limited 2          | 92                  | 0       | 0     | 24  | 0    | 24    | 26.1%             | 23.6             | 567            | 105                   |
|                            | Limited 6          | 128                 | 0       | 0     | 28  | 6    | 34    | 26.6%             | 29.1             | 989            | 151                   |
|                            | General            | 900                 | 141     | 24    | 34  | 0    | 199   | 22.1%             | 26.8             | 5342           |                       |
|                            | Pooled Total       | 1079                | 141     | 24    | 86  | 6    | 257   | 23.8%             | 26.8             | 6898           |                       |
|                            | Pooled Resident    | 926                 | 111     | 21    | 74  | 6    | 212   | 22.9%             | 28.3             | 6002           |                       |
|                            | Pooled Nonresident | 153                 | 30      | 3     | 12  | 0    | 45    | 29.4%             | 19.9             | 896            |                       |
|                            |                    |                     |         |       |     |      |       |                   |                  |                |                       |
| 11 Medicine Bow River      |                    |                     |         |       |     |      |       |                   |                  |                |                       |
|                            | Limited 1          | 147                 | 49      | 9     | 8   | 6    | 72    | 49.0%             | 15.6             | 1125           | 153                   |
|                            | Limited 2          | 273                 | 0       | 0     | 45  | 22   | 67    | 24.5%             | 29.4             | 1967           | 301                   |
|                            | Pooled Total       | 420                 | 49      | 9     | 53  | 28   | 139   | 33.1%             | 22.2             | 3092           |                       |
|                            | Pooled Resident    | 364                 | 32      | 9     | 33  | 28   | 102   | 28.0%             | 27.3             | 2781           |                       |
|                            | Pooled Nonresident | 56                  | 17      | 0     | 20  | 0    | 37    | 66.1%             | 8.4              | 311            |                       |
|                            |                    |                     |         |       |     |      |       |                   |                  |                |                       |
| 12 Kennaday Peak           |                    |                     |         |       |     |      |       |                   |                  |                |                       |
|                            | Limited 2          | 105                 | 0       | 0     | 21  | 13   | 34    | 32.4%             | 19.1             | 648            | 114                   |
| (13, 15, 110)              | Limited 6          | 14                  | 0       | 0     | 8   | 2    | 10    | 71.4%             | 3.7              | 37             | 75                    |
|                            | General            | 1129                | 143     | 54    | 128 | 27   | 352   | 31.2%             | 19.2             | 6773           |                       |
|                            | Pooled Total       | 1248                | 143     | 54    | 157 | 42   | 396   | 31.7%             | 18.8             | 7458           |                       |
|                            | Pooled Resident    | 1118                | 117     | 54    | 140 | 34   | 345   | 30.9%             | 19.6             | 6771           |                       |
|                            | Pooled Nonresident | 130                 | 26      | 0     | 17  | 8    | 51    | 39.2%             | 13.5             | 687            |                       |
|                            |                    |                     |         |       |     |      |       |                   |                  |                |                       |
| 13 Big Creek               |                    |                     |         |       |     |      |       |                   |                  |                |                       |
|                            | Limited 2          | 128                 | 0       | 0     | 28  | 1    | 29    | 22.7%             | 29.9             | 866            | 140                   |
| (12, 15, 110)              | Limited 6          | 8                   | 0       | 0     | 4   | 2    | 6     | 75.0%             | 7.0              | 42             | 75                    |
|                            | General            | 1112                | 183     | 52    | 69  | 29   | 333   | 29.9%             | 20.6             | 6847           |                       |
|                            | Pooled Total       | 1245                | 183     | 52    | 101 | 32   | 368   | 29.6%             | 21.1             | 7755           |                       |
|                            | Pooled Resident    | 979                 | 114     | 36    | 68  | 21   | 239   | 24.4%             | 25.7             | 6136           |                       |
|                            | Pooled Nonresident | 266                 | 69      | 16    | 33  | 11   | 129   | 48.5%             | 12.6             | 1619           |                       |
|                            |                    |                     |         |       |     |      |       |                   |                  |                |                       |
| 15 Spring Creek            |                    |                     |         |       |     |      |       |                   |                  |                |                       |
|                            | Limited 2          | 81                  | 0       | 0     | 27  | 6    | 33    | 40.7%             | 16.9             | 558            | 85                    |
| (12, 13, 110)              | Limited 6          | 7                   | 0       | 0     | 1   | 0    | 1     | 14.3%             | 13.0             | 13             | 75                    |
|                            | General            | 885                 | 79      | 61    | 44  | 7    | 191   | 21.6%             | 27.0             | 5150           |                       |
|                            | Pooled Total       | 973                 | 79      | 61    | 72  | 13   | 225   | 23.1%             | 25.4             | 5721           |                       |
|                            | Pooled Resident    | 810                 | 36      | 55    | 58  | 4    | 153   | 18.9%             | 30.9             | 4723           |                       |
|                            | Pooled Nonresident | 163                 | 43      | 6     | 14  | 9    | 72    | 44.2%             | 13.9             | 998            |                       |
|                            |                    |                     |         |       |     |      |       |                   |                  |                |                       |
| 16 Shirley Mountain        |                    |                     |         |       |     |      |       |                   |                  |                |                       |
|                            | Limited 1          | 187                 | 95      | 10    | 3   | 3    | 111   | 59.4%             | 10.6             | 1173           | 204                   |
|                            | Limited 2          | 200                 | 0       | 0     | 98  | 21   | 119   | 59.5%             | 8.5              | 1010           | 227                   |
|                            | Limited 6          | 125                 | 0       | 0     | 47  | 15   | 62    | 49.6%             | 12.1             | 751            | 153                   |
|                            | Limited 7          | 30                  | 0       | 0     | 12  | 8    | 20    | 66.7%             | 4.4              | 88             | 35                    |
|                            | Pooled Total       | 528                 | 95      | 10    | 160 | 47   | 312   | 59.1%             | 9.7              | 3022           |                       |
|                            | Pooled Resident    | 452                 | 65      | 10    | 135 | 43   | 253   | 56.0%             | 10.5             | 2667           |                       |
|                            | Pooled Nonresident | 76                  | 30      | 0     | 25  | 4    | 59    | 77.6%             | 6.0              | 355            |                       |
|                            |                    |                     |         |       |     |      |       |                   |                  |                |                       |
| 19 Muddy Mountain          |                    |                     |         |       |     |      |       |                   |                  |                |                       |
|                            | Limited 1          | 140                 | 62      | 3     | 0   | 3    | 68    | 48.6%             | 16.9             | 1148           | 154                   |
|                            | Limited 2          | 138                 | 58      | 0     | 0   | 0    | 58    | 42.0%             | 21.9             | 1268           | 155                   |
|                            | Limited 3          | 102                 | 0       | 0     | 19  | 13   | 32    | 31.4%             | 22.3             | 714            | 121                   |
|                            | Limited 4          | 52                  | 0       | 0     | 8   | 2    | 10    | 19.2%             | 29.8             | 298            | 66                    |
|                            | Limited 6          | 119                 | 0       | 0     | 9   | 9    | 18    | 15.1%             | 59.9             | 1079           | 150                   |
|                            | Pooled Total       | 514                 | 120     | 3     | 36  | 27   | 186   | 36.2%             | 24.2             | 4507           |                       |
|                            | Pooled Resident    | 460                 | 91      | 3     | 36  | 27   | 157   | 34.1%             | 26.2             | 4107           |                       |
|                            | Pooled Nonresident | 54                  | 29      | 0     | 0   | 0    | 29    | 53.7%             | 13.8             | 400            |                       |
|                            |                    |                     |         |       |     |      |       |                   |                  |                |                       |
| 21 Baggs                   |                    |                     |         |       |     |      |       |                   |                  |                |                       |
|                            | Limited 2          | 474                 | 0       | 0     | 182 | 48   | 230   | 48.5%             | 12.3             | 2824           | 542                   |
|                            | Limited 6          | 16                  | 0       | 0     | 5   | 4    | 9     | 56.3%             | 11.7             | 105            | 25                    |
|                            | General            | 2553                | 368     | 279   | 180 | 15   | 842   | 33.0%             | 19.0             | 15972          |                       |
|                            | Pooled Total       | 3026                | 368     | 279   | 367 | 67   | 1081  | 35.7%             | 17.5             | 18901          |                       |
|                            | Pooled Resident    | 2672                | 312     | 240   | 308 | 36   | 896   | 33.5%             | 19.0             | 16995          |                       |
|                            | Pooled Nonresident | 354                 | 56      | 39    | 59  | 31   | 185   | 52.3%             | 10.3             | 1906           |                       |

TABLE I-A (Continued)  
ELK HUNT AREA REPORT

| AREA<br>(cross hunt areas) | TYPE           | ACTIVE<br>LICS/HTRS | HARVEST |       |     |      |       | HUNTER<br>SUCCESS | DAYS/<br>HARVEST | HUNTER<br>DAYS | LICENSES<br>SOLD      |
|----------------------------|----------------|---------------------|---------|-------|-----|------|-------|-------------------|------------------|----------------|-----------------------|
|                            |                |                     | BULL    | SPIKE | COW | CALF | TOTAL |                   |                  |                | (cross hunt<br>incl.) |
|                            |                |                     |         |       |     |      |       |                   |                  |                |                       |
| 22 Ferris                  |                |                     |         |       |     |      |       |                   |                  |                |                       |
|                            | Limited 1      | 51                  | 30      | 2     | 0   | 0    | 32    | 62.7%             | 13.9             | 445            | 52                    |
|                            | Limited 2      | 66                  | 0       | 0     | 13  | 4    | 17    | 25.8%             | 18.1             | 307            | 79                    |
| Pooled Total               |                | 117                 | 30      | 2     | 13  | 4    | 49    | 41.9%             | 15.3             | 752            |                       |
| Pooled Resident            |                | 99                  | 26      | 2     | 9   | 4    | 41    | 41.4%             | 15.9             | 652            |                       |
| Pooled Nonresident         |                | 18                  | 4       | 0     | 4   | 0    | 8     | 44.4%             | 12.5             | 100            |                       |
|                            |                |                     |         |       |     |      |       |                   |                  |                |                       |
| 23 Rattlesnake             |                |                     |         |       |     |      |       |                   |                  |                |                       |
|                            | Limited 1      | 105                 | 62      | 0     | 5   | 0    | 67    | 63.8%             | 9.1              | 612            | 105                   |
|                            | Limited 2      | 80                  | 0       | 0     | 36  | 3    | 39    | 48.8%             | 17.7             | 689            | 100                   |
|                            | Limited 6      | 137                 | 0       | 0     | 30  | 9    | 39    | 28.5%             | 24.8             | 968            | 150                   |
| Pooled Total               |                | 295                 | 62      | 0     | 71  | 12   | 145   | 49.2%             | 15.6             | 2269           |                       |
| Pooled Resident            |                | 254                 | 53      | 0     | 62  | 10   | 125   | 49.2%             | 16.8             | 2103           |                       |
| Pooled Nonresident         |                | 41                  | 9       | 0     | 9   | 2    | 20    | 48.8%             | 8.3              | 166            |                       |
|                            |                |                     |         |       |     |      |       |                   |                  |                |                       |
| 24 Green Mountain          |                |                     |         |       |     |      |       |                   |                  |                |                       |
|                            | Limited 1      | 127                 | 64      | 7     | 0   | 0    | 71    | 55.9%             | 11.1             | 785            | 131                   |
|                            | Limited 2      | 71                  | 0       | 0     | 43  | 8    | 51    | 71.8%             | 5.3              | 270            | 75                    |
|                            | Limited 3      | 117                 | 0       | 0     | 48  | 3    | 51    | 43.6%             | 11.5             | 584            | 128                   |
| Pooled Total               |                | 315                 | 64      | 7     | 91  | 11   | 173   | 54.9%             | 9.5              | 1639           |                       |
| Pooled Resident            |                | 278                 | 48      | 7     | 81  | 10   | 146   | 52.5%             | 10.0             | 1455           |                       |
| Pooled Nonresident         |                | 37                  | 16      | 0     | 10  | 1    | 27    | 73.0%             | 6.8              | 184            |                       |
|                            |                |                     |         |       |     |      |       |                   |                  |                |                       |
| 25 South Pass              |                |                     |         |       |     |      |       |                   |                  |                |                       |
|                            | (27) Limited 1 | 123                 | 43      | 6     | 8   | 1    | 58    | 47.2%             | 13.8             | 798            | 155                   |
|                            | (27) Limited 2 | 72                  | 0       | 0     | 26  | 2    | 28    | 38.9%             | 19.9             | 557            | 100                   |
|                            | Limited 6      | 137                 | 0       | 0     | 50  | 16   | 66    | 48.2%             | 10.5             | 695            | 152                   |
| Pooled Total               |                | 310                 | 43      | 6     | 84  | 19   | 152   | 49.0%             | 13.5             | 2050           |                       |
| Pooled Resident            |                | 265                 | 36      | 6     | 65  | 7    | 114   | 43.0%             | 15.5             | 1769           |                       |
| Pooled Nonresident         |                | 45                  | 7       | 0     | 19  | 12   | 38    | 84.4%             | 7.4              | 281            |                       |
|                            |                |                     |         |       |     |      |       |                   |                  |                |                       |
| 27 Upper Sweetwater        |                |                     |         |       |     |      |       |                   |                  |                |                       |
|                            | (25) Limited 1 | 52                  | 10      | 2     | 4   | 0    | 16    | 30.8%             | 17.0             | 272            | 155                   |
|                            | (25) Limited 2 | 38                  | 0       | 0     | 10  | 0    | 10    | 26.3%             | 19.3             | 193            | 100                   |
| Pooled Total               |                | 90                  | 10      | 2     | 14  | 0    | 26    | 28.9%             | 17.9             | 465            |                       |
| Pooled Resident            |                | 69                  | 6       | 2     | 14  | 0    | 22    | 31.9%             | 14.7             | 323            |                       |
| Pooled Nonresident         |                | 21                  | 4       | 0     | 0   | 0    | 4     | 19.0%             | 35.5             | 142            |                       |
|                            |                |                     |         |       |     |      |       |                   |                  |                |                       |
| 28 Cony Mountain           |                |                     |         |       |     |      |       |                   |                  |                |                       |
|                            | Limited 2      | 174                 | 0       | 0     | 40  | 7    | 47    | 27.0%             | 24.1             | 1132           | 201                   |
|                            | Limited 6      | 141                 | 0       | 0     | 33  | 7    | 40    | 28.4%             | 19.2             | 768            | 152                   |
|                            | General        | 1047                | 175     | 104   | 0   | 0    | 279   | 26.6%             | 26.2             | 7304           |                       |
| Pooled Total               |                | 1346                | 175     | 104   | 73  | 14   | 366   | 27.2%             | 25.1             | 9204           |                       |
| Pooled Resident            |                | 1252                | 159     | 91    | 53  | 14   | 317   | 25.3%             | 27.0             | 8564           |                       |
| Pooled Nonresident         |                | 94                  | 16      | 13    | 20  | 0    | 49    | 52.1%             | 13.1             | 640            |                       |
|                            |                |                     |         |       |     |      |       |                   |                  |                |                       |
| 30 Aspen Mountain          |                |                     |         |       |     |      |       |                   |                  |                |                       |
|                            | Limited 1      | 52                  | 39      | 0     | 5   | 0    | 44    | 84.6%             | 10.2             | 447            | 54                    |
|                            | Limited 2      | 130                 | 0       | 0     | 68  | 18   | 86    | 66.2%             | 9.5              | 815            | 130                   |
| Pooled Total               |                | 182                 | 39      | 0     | 73  | 18   | 130   | 71.4%             | 9.7              | 1262           |                       |
| Pooled Resident            |                | 157                 | 28      | 0     | 66  | 18   | 112   | 71.3%             | 10.1             | 1136           |                       |
| Pooled Nonresident         |                | 25                  | 11      | 0     | 7   | 0    | 18    | 72.0%             | 7.0              | 126            |                       |
|                            |                |                     |         |       |     |      |       |                   |                  |                |                       |
| 31 Little Mountain         |                |                     |         |       |     |      |       |                   |                  |                |                       |
|                            | Limited 1      | 106                 | 88      | 3     | 0   | 2    | 93    | 87.7%             | 9.1              | 845            | 106                   |
|                            | Limited 2      | 172                 | 0       | 0     | 116 | 14   | 130   | 75.6%             | 5.3              | 689            | 179                   |
| Pooled Total               |                | 278                 | 88      | 3     | 116 | 16   | 223   | 80.2%             | 6.9              | 1534           |                       |
| Pooled Resident            |                | 240                 | 71      | 3     | 103 | 16   | 193   | 80.4%             | 6.8              | 1303           |                       |
| Pooled Nonresident         |                | 38                  | 17      | 0     | 13  | 0    | 30    | 78.9%             | 7.7              | 231            |                       |
|                            |                |                     |         |       |     |      |       |                   |                  |                |                       |
| 32 Pine Mountain           |                |                     |         |       |     |      |       |                   |                  |                |                       |
|                            | Limited 1      | 95                  | 41      | 3     | 2   | 0    | 46    | 48.4%             | 15.9             | 732            | 99                    |
|                            | Limited 2      | 51                  | 0       | 0     | 21  | 0    | 21    | 41.2%             | 19.4             | 408            | 55                    |
| Pooled Total               |                | 146                 | 41      | 3     | 23  | 0    | 67    | 45.9%             | 17.0             | 1140           |                       |
| Pooled Resident            |                | 115                 | 32      | 0     | 19  | 0    | 51    | 44.3%             | 17.3             | 880            |                       |
| Pooled Nonresident         |                | 31                  | 9       | 3     | 4   | 0    | 16    | 51.6%             | 16.3             | 260            |                       |

TABLE I-A (Continued)  
ELK HUNT AREA REPORT

| AREA<br>(cross hunt areas) | TYPE               | ACTIVE<br>LICS/HTRS | HARVEST |       |     |      |       | HUNTER<br>SUCCESS | DAYS/<br>HARVEST | HUNTER<br>DAYS | LICENSES<br>SOLD      |
|----------------------------|--------------------|---------------------|---------|-------|-----|------|-------|-------------------|------------------|----------------|-----------------------|
|                            |                    |                     | BULL    | SPIKE | COW | CALF | TOTAL |                   |                  |                | (cross hunt<br>incl.) |
|                            |                    |                     |         |       |     |      |       |                   |                  |                |                       |
| 33 Middle Fork             | Limited 1          | 91                  | 32      | 3     | 12  | 2    | 49    | 53.8%             | 12.6             | 619            | 101                   |
|                            | Limited 2          | 51                  | 0       | 0     | 17  | 0    | 17    | 33.3%             | 14.1             | 240            | 55                    |
|                            | Pooled Total       | 142                 | 32      | 3     | 29  | 2    | 66    | 46.5%             | 13.0             | 859            |                       |
|                            | Pooled Resident    | 114                 | 20      | 3     | 21  | 0    | 44    | 38.6%             | 16.3             | 718            |                       |
|                            | Pooled Nonresident | 28                  | 12      | 0     | 8   | 2    | 22    | 78.6%             | 6.4              | 141            |                       |
|                            |                    |                     |         |       |     |      |       |                   |                  |                |                       |
| 34 Upper Powder River      | Limited 1          | 698                 | 173     | 30    | 66  | 13   | 282   | 40.4%             | 17.1             | 4832           | 807                   |
|                            | Limited 6          | 283                 | 0       | 0     | 44  | 28   | 72    | 25.4%             | 21.7             | 1563           | 344                   |
|                            | Pooled Total       | 970                 | 173     | 30    | 110 | 41   | 354   | 36.5%             | 18.1             | 6395           |                       |
|                            | Pooled Resident    | 761                 | 106     | 13    | 84  | 41   | 244   | 32.1%             | 21.4             | 5231           |                       |
|                            | Pooled Nonresident | 209                 | 67      | 17    | 26  | 0    | 110   | 52.6%             | 10.6             | 1164           |                       |
|                            |                    |                     |         |       |     |      |       |                   |                  |                |                       |
| 35 Hunter Mesa             | Limited 1          | 148                 | 46      | 14    | 0   | 0    | 60    | 40.5%             | 18.6             | 1116           | 151                   |
|                            | Limited 2          | 72                  | 0       | 0     | 31  | 4    | 35    | 48.6%             | 18.0             | 631            | 76                    |
|                            | Limited 6          | 28                  | 0       | 0     | 16  | 3    | 19    | 67.9%             | 5.4              | 102            | 50                    |
|                            | Limited 9          | 49                  | 15      | 3     | 0   | 0    | 18    | 36.7%             | 27.3             | 491            | 53                    |
|                            | Pooled Total       | 293                 | 61      | 17    | 47  | 7    | 132   | 45.1%             | 17.7             | 2340           |                       |
|                            | Pooled Resident    | 247                 | 47      | 14    | 41  | 6    | 108   | 43.7%             | 18.9             | 2045           |                       |
|                            | Pooled Nonresident | 46                  | 14      | 3     | 6   | 1    | 24    | 52.2%             | 12.3             | 295            |                       |
|                            |                    |                     |         |       |     |      |       |                   |                  |                |                       |
| 36 Rock Creek              | Limited 2          | 149                 | 0       | 0     | 32  | 12   | 44    | 29.5%             | 22.4             | 984            | 156                   |
|                            | Limited 9          | 50                  | 0       | 0     | 0   | 0    | 0     | 0.0%              | 0.0              | 317            | 57                    |
|                            | General            | 584                 | 52      | 22    | 0   | 0    | 74    | 12.7%             | 44.9             | 3324           |                       |
|                            | Pooled Total       | 783                 | 52      | 22    | 32  | 12   | 118   | 15.1%             | 39.2             | 4625           |                       |
|                            | Pooled Resident    | 689                 | 49      | 19    | 27  | 12   | 107   | 15.5%             | 38.4             | 4112           |                       |
|                            | Pooled Nonresident | 94                  | 3       | 3     | 5   | 0    | 11    | 11.7%             | 46.6             | 513            |                       |
|                            |                    |                     |         |       |     |      |       |                   |                  |                |                       |
| 37 Goose                   | Limited 6          | 321                 | 0       | 0     | 71  | 8    | 79    | 24.6%             | 26.1             | 2060           | 409                   |
|                            | Limited 9          | 138                 | 13      | 3     | 0   | 0    | 16    | 11.6%             | 79.8             | 1277           | 154                   |
|                            | General            | 928                 | 100     | 22    | 43  | 4    | 169   | 18.2%             | 36.1             | 6096           |                       |
|                            | Pooled Total       | 1356                | 113     | 25    | 114 | 12   | 264   | 19.5%             | 35.7             | 9433           |                       |
|                            | Pooled Resident    | 1186                | 97      | 25    | 100 | 12   | 234   | 19.7%             | 35.5             | 8303           |                       |
|                            | Pooled Nonresident | 170                 | 16      | 0     | 14  | 0    | 30    | 17.6%             | 37.7             | 1130           |                       |
|                            |                    |                     |         |       |     |      |       |                   |                  |                |                       |
| 38 Tongue                  | Limited 1          | 378                 | 92      | 19    | 11  | 12   | 134   | 35.4%             | 18.7             | 2505           | 403                   |
|                            | Limited 2          | 425                 | 0       | 0     | 16  | 16   | 32    | 7.5%              | 78.9             | 2526           | 451                   |
|                            | Limited 9          | 248                 | 51      | 0     | 10  | 0    | 61    | 24.6%             | 43.6             | 2661           | 253                   |
|                            | Pooled Total       | 1051                | 143     | 19    | 37  | 28   | 227   | 21.6%             | 33.9             | 7692           |                       |
|                            | Pooled Resident    | 868                 | 117     | 19    | 19  | 21   | 176   | 20.3%             | 36.8             | 6479           |                       |
| Pooled Nonresident         | 183                | 26                  | 0       | 18    | 7   | 51   | 27.9% | 23.8              | 1213             |                |                       |
|                            |                    |                     |         |       |     |      |       |                   |                  |                |                       |
| 39 Deer Creek              | Limited 1          | 88                  | 14      | 9     | 28  | 6    | 57    | 64.8%             | 7.3              | 417            | 93                    |
|                            | Limited 2          | 76                  | 23      | 7     | 0   | 0    | 30    | 39.5%             | 14.9             | 448            | 80                    |
|                            | Limited 9          | 71                  | 14      | 6     | 4   | 0    | 24    | 33.8%             | 33.8             | 812            | 71                    |
|                            | Pooled Total       | 235                 | 51      | 22    | 32  | 6    | 111   | 47.2%             | 15.1             | 1677           |                       |
|                            | Pooled Resident    | 197                 | 35      | 18    | 32  | 2    | 87    | 44.2%             | 16.1             | 1404           |                       |
| Pooled Nonresident         | 38                 | 16                  | 4       | 0     | 4   | 24   | 63.2% | 11.4              | 273              |                |                       |
|                            |                    |                     |         |       |     |      |       |                   |                  |                |                       |
| 40 Horse Creek             | Limited 1          | 155                 | 44      | 7     | 20  | 0    | 71    | 45.8%             | 9.0              | 637            | 177                   |
|                            | Limited 2          | 93                  | 0       | 0     | 30  | 4    | 34    | 36.6%             | 13.9             | 471            | 103                   |
|                            | Limited 9          | 47                  | 5       | 2     | 3   | 0    | 10    | 21.3%             | 46.4             | 464            | 54                    |
|                            | Pooled Total       | 295                 | 49      | 9     | 53  | 4    | 115   | 39.0%             | 13.7             | 1572           |                       |
|                            | Pooled Resident    | 242                 | 35      | 9     | 41  | 4    | 89    | 36.8%             | 15.0             | 1334           |                       |
|                            | Pooled Nonresident | 53                  | 14      | 0     | 12  | 0    | 26    | 49.1%             | 9.2              | 238            |                       |

TABLE I-A (Continued)  
ELK HUNT AREA REPORT

| AREA<br>(cross hunt areas) | TYPE      | ACTIVE<br>LICS/HTRS | HARVEST |       |     |      |       | HUNTER<br>SUCCESS | DAYS/<br>HARVEST | HUNTER<br>DAYS | LICENSES<br>SOLD      |
|----------------------------|-----------|---------------------|---------|-------|-----|------|-------|-------------------|------------------|----------------|-----------------------|
|                            |           |                     | BULL    | SPIKE | COW | CALF | TOTAL |                   |                  |                | (cross hunt<br>incl.) |
|                            |           |                     |         |       |     |      |       |                   |                  |                |                       |
| 41 North Medicine Lodge    |           |                     |         |       |     |      |       |                   |                  |                |                       |
| (42)                       | Limited 1 | 286                 | 55      | 21    | 29  | 0    | 105   | 36.7%             | 17.7             | 1859           | 355                   |
| (42)                       | Limited 2 | 228                 | 0       | 0     | 49  | 3    | 52    | 22.8%             | 30.0             | 1560           | 327                   |
| (42)                       | Limited 9 | 92                  | 11      | 0     | 0   | 0    | 11    | 12.0%             | 75.6             | 832            | 106                   |
| Pooled Total               |           | 606                 | 66      | 21    | 78  | 3    | 168   | 27.7%             | 25.3             | 4251           |                       |
| Pooled Resident            |           | 511                 | 40      | 16    | 69  | 3    | 128   | 25.0%             | 28.7             | 3679           |                       |
| Pooled Nonresident         |           | 95                  | 26      | 5     | 9   | 0    | 40    | 42.1%             | 14.3             | 572            |                       |
|                            |           |                     |         |       |     |      |       |                   |                  |                |                       |
| 42 Medicine Lodge          |           |                     |         |       |     |      |       |                   |                  |                |                       |
| (41)                       | Limited 1 | 103                 | 22      | 0     | 8   | 0    | 30    | 29.1%             | 23.7             | 711            | 355                   |
| (41)                       | Limited 2 | 146                 | 0       | 0     | 24  | 6    | 30    | 20.5%             | 32.9             | 987            | 327                   |
| (41)                       | Limited 9 | 16                  | 1       | 1     | 0   | 0    | 2     | 12.5%             | 51.0             | 102            | 106                   |
| Pooled Total               |           | 265                 | 23      | 1     | 32  | 6    | 62    | 23.4%             | 29.0             | 1800           |                       |
| Pooled Resident            |           | 220                 | 12      | 0     | 18  | 6    | 36    | 16.4%             | 42.1             | 1515           |                       |
| Pooled Nonresident         |           | 45                  | 11      | 1     | 14  | 0    | 26    | 57.8%             | 11.0             | 285            |                       |
|                            |           |                     |         |       |     |      |       |                   |                  |                |                       |
| 45 Paint Rock Creek        |           |                     |         |       |     |      |       |                   |                  |                |                       |
| (46)                       | Limited 1 | 286                 | 128     | 15    | 11  | 0    | 154   | 53.8%             | 10.2             | 1576           | 351                   |
|                            | Limited 2 | 172                 | 0       | 0     | 84  | 19   | 103   | 59.9%             | 11.6             | 1194           | 179                   |
| (46)                       | Limited 3 | 131                 | 0       | 0     | 52  | 8    | 60    | 45.8%             | 11.6             | 696            | 155                   |
| (46)                       | Limited 9 | 120                 | 32      | 0     | 4   | 1    | 37    | 30.8%             | 37.5             | 1388           | 142                   |
| Pooled Total               |           | 709                 | 160     | 15    | 151 | 28   | 354   | 49.9%             | 13.7             | 4854           |                       |
| Pooled Resident            |           | 606                 | 131     | 15    | 113 | 27   | 286   | 47.2%             | 14.3             | 4104           |                       |
| Pooled Nonresident         |           | 103                 | 29      | 0     | 38  | 1    | 68    | 66.0%             | 11.0             | 750            |                       |
|                            |           |                     |         |       |     |      |       |                   |                  |                |                       |
| 46 Leigh Creek             |           |                     |         |       |     |      |       |                   |                  |                |                       |
| (45)                       | Limited 1 | 111                 | 38      | 4     | 11  | 0    | 53    | 47.7%             | 10.5             | 557            | 351                   |
| (45)                       | Limited 3 | 34                  | 0       | 0     | 13  | 0    | 13    | 38.2%             | 10.2             | 133            | 155                   |
| (45)                       | Limited 9 | 21                  | 6       | 0     | 0   | 0    | 6     | 28.6%             | 27.5             | 165            | 142                   |
| Pooled Total               |           | 166                 | 44      | 4     | 24  | 0    | 72    | 43.4%             | 11.9             | 855            |                       |
| Pooled Resident            |           | 147                 | 34      | 4     | 24  | 0    | 62    | 42.2%             | 11.6             | 720            |                       |
| Pooled Nonresident         |           | 19                  | 10      | 0     | 0   | 0    | 10    | 52.6%             | 13.5             | 135            |                       |
|                            |           |                     |         |       |     |      |       |                   |                  |                |                       |
| 47 Copper Mountain         |           |                     |         |       |     |      |       |                   |                  |                |                       |
|                            | Limited 1 | 97                  | 37      | 2     | 5   | 5    | 49    | 50.5%             | 9.0              | 441            | 102                   |
|                            | Limited 3 | 24                  | 13      | 3     | 1   | 0    | 17    | 70.8%             | 4.9              | 84             | 25                    |
|                            | Limited 6 | 43                  | 0       | 0     | 12  | 2    | 14    | 32.6%             | 18.4             | 258            | 50                    |
| Pooled Total               |           | 142                 | 50      | 5     | 18  | 7    | 80    | 56.3%             | 9.8              | 783            |                       |
| Pooled Resident            |           | 107                 | 42      | 3     | 11  | 7    | 63    | 58.9%             | 8.7              | 545            |                       |
| Pooled Nonresident         |           | 35                  | 8       | 2     | 7   | 0    | 17    | 48.6%             | 14.0             | 238            |                       |
|                            |           |                     |         |       |     |      |       |                   |                  |                |                       |
| 48 Upper Nowood            |           |                     |         |       |     |      |       |                   |                  |                |                       |
|                            | Limited 1 | 278                 | 127     | 0     | 29  | 6    | 162   | 58.3%             | 12.8             | 2069           | 302                   |
|                            | Limited 2 | 60                  | 0       | 0     | 17  | 5    | 22    | 36.7%             | 13.2             | 290            | 68                    |
|                            | Limited 6 | 367                 | 0       | 0     | 164 | 11   | 175   | 47.7%             | 11.0             | 1923           | 428                   |
| Pooled Total               |           | 663                 | 127     | 0     | 210 | 22   | 359   | 54.1%             | 11.9             | 4282           |                       |
| Pooled Resident            |           | 484                 | 100     | 0     | 150 | 18   | 268   | 55.4%             | 13.4             | 3598           |                       |
| Pooled Nonresident         |           | 179                 | 27      | 0     | 60  | 4    | 91    | 50.8%             | 7.5              | 684            |                       |
|                            |           |                     |         |       |     |      |       |                   |                  |                |                       |
| 49 Otter Creek             |           |                     |         |       |     |      |       |                   |                  |                |                       |
|                            | Limited 1 | 267                 | 66      | 6     | 39  | 0    | 111   | 41.6%             | 16.8             | 1862           | 277                   |
|                            | Limited 2 | 65                  | 0       | 0     | 23  | 3    | 26    | 40.0%             | 16.3             | 423            | 72                    |
|                            | Limited 6 | 222                 | 0       | 0     | 83  | 17   | 100   | 45.0%             | 12.4             | 1239           | 251                   |
| Pooled Total               |           | 545                 | 66      | 6     | 145 | 20   | 237   | 43.5%             | 14.9             | 3524           |                       |
| Pooled Resident            |           | 435                 | 45      | 6     | 122 | 20   | 193   | 44.4%             | 15.2             | 2940           |                       |
| Pooled Nonresident         |           | 110                 | 21      | 0     | 23  | 0    | 44    | 40.0%             | 13.3             | 584            |                       |
|                            |           |                     |         |       |     |      |       |                   |                  |                |                       |
| 50 Beartooth               |           |                     |         |       |     |      |       |                   |                  |                |                       |
|                            | Limited 1 | 24                  | 0       | 7     | 8   | 0    | 15    | 62.5%             | 10.4             | 156            | 27                    |
|                            | Limited 2 | 39                  | 0       | 0     | 36  | 0    | 36    | 92.3%             | 6.6              | 237            | 41                    |
|                            | Limited 9 | 12                  | 2       | 0     | 0   | 0    | 2     | 16.7%             | 46.0             | 92             | 12                    |
|                            | General   | 157                 | 34      | 15    | 0   | 0    | 49    | 31.2%             | 18.9             | 928            |                       |
| Pooled Total               |           | 232                 | 36      | 22    | 44  | 0    | 102   | 44.0%             | 13.9             | 1413           |                       |
| Pooled Resident            |           | 205                 | 34      | 15    | 39  | 0    | 88    | 42.9%             | 14.4             | 1263           |                       |
| Pooled Nonresident         |           | 27                  | 2       | 7     | 5   | 0    | 14    | 51.9%             | 10.7             | 150            |                       |

TABLE I-A (Continued)  
ELK HUNT AREA REPORT

| AREA<br>(cross hunt areas) | TYPE                               | ACTIVE<br>LICS/HTRS | HARVEST |       |     |      |       | HUNTER<br>SUCCESS | DAYS/<br>HARVEST | HUNTER<br>DAYS | LICENSES<br>SOLD      |
|----------------------------|------------------------------------|---------------------|---------|-------|-----|------|-------|-------------------|------------------|----------------|-----------------------|
|                            |                                    |                     | BULL    | SPIKE | COW | CALF | TOTAL |                   |                  |                | (cross hunt<br>incl.) |
|                            |                                    |                     |         |       |     |      |       |                   |                  |                |                       |
| 51 Crandall                |                                    |                     |         |       |     |      |       |                   |                  |                |                       |
|                            | Limited 1                          | 40                  | 14      | 4     | 4   | 2    | 24    | 60.0%             | 9.3              | 223            | 42                    |
|                            | (52) Limited 2                     | 67                  | 0       | 0     | 48  | 5    | 53    | 79.1%             | 6.0              | 317            | 153                   |
|                            | Limited 9                          | 28                  | 8       | 0     | 0   | 0    | 8     | 28.6%             | 23.6             | 189            | 30                    |
|                            | General                            | 276                 | 93      | 7     | 0   | 0    | 100   | 36.2%             | 16.8             | 1683           |                       |
|                            | Pooled Total                       | 411                 | 115     | 11    | 52  | 7    | 185   | 45.0%             | 13.0             | 2412           |                       |
|                            | Pooled Resident                    | 279                 | 54      | 8     | 44  | 6    | 112   | 40.1%             | 15.8             | 1769           |                       |
|                            | Pooled Nonresident                 | 132                 | 61      | 3     | 8   | 1    | 73    | 55.3%             | 8.8              | 643            |                       |
|                            |                                    |                     |         |       |     |      |       |                   |                  |                |                       |
| 52 Sunlight                |                                    |                     |         |       |     |      |       |                   |                  |                |                       |
|                            | Limited 1                          | 28                  | 9       | 3     | 4   | 0    | 16    | 57.1%             | 11.8             | 189            | 28                    |
|                            | (51) Limited 2                     | 89                  | 0       | 0     | 75  | 0    | 75    | 84.3%             | 4.9              | 364            | 153                   |
|                            | Limited 9                          | 6                   | 0       | 0     | 0   | 0    | 0     | 0.0%              | 0.0              | 38             | 6                     |
|                            | General                            | 196                 | 31      | 0     | 0   | 0    | 31    | 15.8%             | 40.5             | 1256           |                       |
|                            | Pooled Total                       | 319                 | 40      | 3     | 79  | 0    | 122   | 38.2%             | 15.1             | 1847           |                       |
|                            | Pooled Resident                    | 284                 | 30      | 3     | 75  | 0    | 108   | 38.0%             | 15.5             | 1669           |                       |
|                            | Pooled Nonresident                 | 35                  | 10      | 0     | 4   | 0    | 14    | 40.0%             | 12.7             | 178            |                       |
|                            |                                    |                     |         |       |     |      |       |                   |                  |                |                       |
| 53 Dead Indian             |                                    |                     |         |       |     |      |       |                   |                  |                |                       |
|                            | (54, 65) Limited 1                 | 29                  | 7       | 2     | 0   | 0    | 9     | 31.0%             | 22.7             | 204            | 51                    |
|                            | (54, 65) Limited 2                 | 68                  | 0       | 0     | 26  | 2    | 28    | 41.2%             | 18.1             | 506            | 150                   |
|                            | (54, 65) Limited 6                 | 58                  | 0       | 0     | 28  | 2    | 30    | 51.7%             | 8.5              | 256            | 150                   |
|                            | (54, 65) Limited 9                 | 11                  | 2       | 0     | 0   | 0    | 2     | 18.2%             | 46.0             | 92             | 26                    |
|                            | General                            | 57                  | 6       | 0     | 0   | 0    | 6     | 10.5%             | 44.5             | 267            |                       |
|                            | Pooled Total                       | 215                 | 15      | 2     | 54  | 4    | 75    | 34.9%             | 17.7             | 1325           |                       |
|                            | Pooled Resident                    | 202                 | 15      | 0     | 52  | 4    | 71    | 35.1%             | 17.7             | 1259           |                       |
|                            | Pooled Nonresident                 | 13                  | 0       | 2     | 2   | 0    | 4     | 30.8%             | 16.5             | 66             |                       |
|                            |                                    |                     |         |       |     |      |       |                   |                  |                |                       |
| 54 Bald Ridge              |                                    |                     |         |       |     |      |       |                   |                  |                |                       |
|                            | (53, 65) Limited 1                 | 31                  | 5       | 0     | 2   | 0    | 7     | 22.6%             | 30.0             | 210            | 51                    |
|                            | (53, 65, also valid 121) Limited 2 | 91                  | 0       | 0     | 36  | 0    | 36    | 39.6%             | 15.6             | 560            | 150                   |
|                            | Limited 3                          | 25                  | 0       | 0     | 23  | 0    | 23    | 92.0%             | 2.8              | 65             | 25                    |
|                            | (53, 65, also valid 121) Limited 6 | 63                  | 0       | 0     | 26  | 2    | 28    | 44.4%             | 9.4              | 262            | 150                   |
|                            | (53, 65) Limited 9                 | 22                  | 5       | 0     | 0   | 0    | 5     | 22.7%             | 44.8             | 224            | 26                    |
|                            | Pooled Total                       | 224                 | 10      | 0     | 87  | 2    | 99    | 44.2%             | 13.3             | 1321           |                       |
|                            | Pooled Resident                    | 198                 | 6       | 0     | 82  | 2    | 90    | 45.5%             | 13.3             | 1196           |                       |
|                            | Pooled Nonresident                 | 26                  | 4       | 0     | 5   | 0    | 9     | 34.6%             | 13.9             | 125            |                       |
|                            |                                    |                     |         |       |     |      |       |                   |                  |                |                       |
| 55 Grinnell                |                                    |                     |         |       |     |      |       |                   |                  |                |                       |
|                            | Limited 1                          | 25                  | 5       | 0     | 6   | 0    | 11    | 44.0%             | 16.6             | 183            | 25                    |
|                            | Limited 2                          | 65                  | 0       | 0     | 44  | 4    | 48    | 73.8%             | 6.6              | 318            | 75                    |
|                            | Limited 9                          | 18                  | 1       | 0     | 0   | 0    | 1     | 5.6%              | 93.0             | 93             | 19                    |
|                            | General                            | 343                 | 114     | 0     | 0   | 0    | 114   | 33.2%             | 14.4             | 1642           |                       |
|                            | Pooled Total                       | 451                 | 120     | 0     | 50  | 4    | 174   | 38.6%             | 12.9             | 2236           |                       |
|                            | Pooled Resident                    | 334                 | 60      | 0     | 47  | 4    | 111   | 33.2%             | 15.2             | 1692           |                       |
|                            | Pooled Nonresident                 | 117                 | 60      | 0     | 3   | 0    | 63    | 53.8%             | 8.6              | 544            |                       |
|                            |                                    |                     |         |       |     |      |       |                   |                  |                |                       |
| 56 Wapiti Ridge            |                                    |                     |         |       |     |      |       |                   |                  |                |                       |
|                            | Limited 1                          | 47                  | 20      | 4     | 0   | 0    | 24    | 51.1%             | 12.3             | 294            | 47                    |
|                            | Limited 2                          | 158                 | 0       | 0     | 76  | 12   | 88    | 55.7%             | 11.1             | 977            | 168                   |
|                            | Limited 3                          | 37                  | 0       | 0     | 21  | 0    | 21    | 56.8%             | 10.2             | 215            | 50                    |
|                            | Limited 9                          | 22                  | 6       | 0     | 0   | 0    | 6     | 27.3%             | 22.8             | 137            | 23                    |
|                            | General                            | 366                 | 96      | 21    | 0   | 0    | 117   | 32.0%             | 15.6             | 1827           |                       |
|                            | Pooled Total                       | 630                 | 122     | 25    | 97  | 12   | 256   | 40.6%             | 13.5             | 3450           |                       |
|                            | Pooled Resident                    | 494                 | 84      | 23    | 75  | 9    | 191   | 38.7%             | 14.9             | 2844           |                       |
|                            | Pooled Nonresident                 | 136                 | 38      | 2     | 22  | 3    | 65    | 47.8%             | 9.3              | 606            |                       |
|                            |                                    |                     |         |       |     |      |       |                   |                  |                |                       |
| 58 Sage Creek              |                                    |                     |         |       |     |      |       |                   |                  |                |                       |
|                            | Limited 1                          | 64                  | 47      | 0     | 0   | 0    | 47    | 73.4%             | 13.1             | 616            | 70                    |
|                            | Limited 2                          | 134                 | 0       | 0     | 75  | 8    | 83    | 61.9%             | 14.2             | 1176           | 151                   |
|                            | Pooled Total                       | 198                 | 47      | 0     | 75  | 8    | 130   | 65.7%             | 13.8             | 1792           |                       |
|                            | Pooled Resident                    | 163                 | 36      | 0     | 72  | 8    | 116   | 71.2%             | 13.4             | 1558           |                       |
|                            | Pooled Nonresident                 | 35                  | 11      | 0     | 3   | 0    | 14    | 40.0%             | 16.7             | 234            |                       |

TABLE I-A (Continued)  
ELK HUNT AREA REPORT

| AREA<br>(cross hunt areas)                                                                                          | TYPE               | ACTIVE<br>LICS/HTRS | HARVEST |       |     |      |       | HUNTER<br>SUCCESS | DAYS/<br>HARVEST | HUNTER<br>DAYS | LICENSES<br>SOLD<br>(cross hunt<br>incl.) |
|---------------------------------------------------------------------------------------------------------------------|--------------------|---------------------|---------|-------|-----|------|-------|-------------------|------------------|----------------|-------------------------------------------|
|                                                                                                                     |                    |                     | BULL    | SPIKE | COW | CALF | TOTAL |                   |                  |                |                                           |
| 59 Boulder Basin                                                                                                    | Limited 1          | 11                  | 10      | 0     | 0   | 0    | 10    | 90.9%             | 10.4             | 104            | 13                                        |
|                                                                                                                     | Limited 2          | 151                 | 0       | 0     | 92  | 10   | 102   | 67.5%             | 8.5              | 863            | 154                                       |
|                                                                                                                     | Limited 6          | 84                  | 0       | 0     | 43  | 12   | 55    | 65.5%             | 8.1              | 445            | 101                                       |
|                                                                                                                     | Limited 9          | 25                  | 0       | 0     | 0   | 0    | 0     | 0.0%              | 0.0              | 155            | 33                                        |
|                                                                                                                     | General            | 362                 | 115     | 20    | 0   | 0    | 135   | 37.3%             | 13.2             | 1784           |                                           |
|                                                                                                                     | Pooled Total       | 607                 | 125     | 20    | 135 | 22   | 302   | 49.8%             | 11.1             | 3351           |                                           |
|                                                                                                                     | Pooled Resident    | 457                 | 74      | 20    | 105 | 22   | 221   | 48.4%             | 11.9             | 2626           |                                           |
|                                                                                                                     | Pooled Nonresident | 150                 | 51      | 0     | 30  | 0    | 81    | 54.0%             | 9.0              | 725            |                                           |
| 60 Thorofare                                                                                                        | Limited 9          | 19                  | 4       | 0     | 0   | 0    | 4     | 21.1%             | 24.8             | 99             | 19                                        |
|                                                                                                                     | General            | 379                 | 200     | 3     | 7   | 0    | 210   | 55.4%             | 10.4             | 2193           |                                           |
|                                                                                                                     | Pooled Total       | 398                 | 204     | 3     | 7   | 0    | 214   | 53.8%             | 10.7             | 2292           |                                           |
|                                                                                                                     | Pooled Resident    | 136                 | 59      | 0     | 0   | 0    | 59    | 43.4%             | 14.3             | 846            |                                           |
|                                                                                                                     | Pooled Nonresident | 262                 | 145     | 3     | 7   | 0    | 155   | 59.2%             | 9.3              | 1446           |                                           |
| 61 North Greybull River                                                                                             | Limited 1          | 135                 | 81      | 9     | 3   | 0    | 93    | 68.9%             | 6.9              | 639            | 157                                       |
|                                                                                                                     | Limited 2          | 28                  | 17      | 0     | 3   | 0    | 20    | 71.4%             | 9.7              | 194            | 28                                        |
|                                                                                                                     | Limited 3          | 71                  | 0       | 0     | 39  | 2    | 41    | 57.7%             | 6.1              | 252            | 82                                        |
|                                                                                                                     | General            | 65                  | 0       | 0     | 28  | 4    | 32    | 49.2%             | 8.1              | 260            |                                           |
|                                                                                                                     | Pooled Total       | 299                 | 98      | 9     | 73  | 6    | 186   | 62.2%             | 7.2              | 1345           |                                           |
|                                                                                                                     | Pooled Resident    | 223                 | 60      | 9     | 57  | 4    | 130   | 58.3%             | 7.7              | 1001           |                                           |
|                                                                                                                     | Pooled Nonresident | 76                  | 38      | 0     | 16  | 2    | 56    | 73.7%             | 6.1              | 344            |                                           |
| 62 South Greybull River                                                                                             | Limited 1          | 149                 | 64      | 0     | 6   | 0    | 70    | 47.0%             | 13.5             | 945            | 158                                       |
|                                                                                                                     | Limited 2          | 44                  | 0       | 0     | 15  | 3    | 18    | 40.9%             | 14.4             | 259            | 54                                        |
|                                                                                                                     | Limited 3          | 147                 | 0       | 0     | 32  | 6    | 38    | 25.9%             | 25.7             | 978            | 155                                       |
|                                                                                                                     | Pooled Total       | 340                 | 64      | 0     | 53  | 9    | 126   | 37.1%             | 17.3             | 2182           |                                           |
|                                                                                                                     | Pooled Resident    | 278                 | 44      | 0     | 49  | 5    | 98    | 35.3%             | 18.1             | 1771           |                                           |
|                                                                                                                     | Pooled Nonresident | 62                  | 20      | 0     | 4   | 4    | 28    | 45.2%             | 14.7             | 411            |                                           |
| 63 Wood River-Gooseberry Creek<br>(64)                                                                              | Limited 1          | 151                 | 91      | 8     | 0   | 3    | 102   | 67.5%             | 7.9              | 805            | 210                                       |
|                                                                                                                     | Limited 2          | 141                 | 0       | 0     | 58  | 5    | 63    | 44.7%             | 13.5             | 851            | 159                                       |
|                                                                                                                     | Limited 6          | 90                  | 0       | 0     | 35  | 9    | 44    | 48.9%             | 10.1             | 445            | 100                                       |
|                                                                                                                     | Pooled Total       | 349                 | 91      | 8     | 93  | 17   | 209   | 59.9%             | 10.1             | 2101           |                                           |
|                                                                                                                     | Pooled Resident    | 294                 | 66      | 8     | 76  | 16   | 166   | 56.5%             | 11.0             | 1832           |                                           |
|                                                                                                                     | Pooled Nonresident | 55                  | 25      | 0     | 17  | 1    | 43    | 78.2%             | 6.3              | 269            |                                           |
| 64 Owl Creek<br>(63)                                                                                                | Limited 1          | 92                  | 48      | 3     | 3   | 0    | 54    | 58.7%             | 9.7              | 525            | 210                                       |
|                                                                                                                     | Limited 2          | 95                  | 33      | 10    | 3   | 0    | 46    | 48.4%             | 10.6             | 489            | 103                                       |
|                                                                                                                     | Limited 6          | 106                 | 0       | 0     | 48  | 13   | 61    | 57.5%             | 8.7              | 530            | 125                                       |
|                                                                                                                     | Pooled Total       | 268                 | 81      | 13    | 54  | 13   | 161   | 60.1%             | 9.6              | 1544           |                                           |
|                                                                                                                     | Pooled Resident    | 216                 | 57      | 13    | 41  | 10   | 121   | 56.0%             | 10.6             | 1282           |                                           |
|                                                                                                                     | Pooled Nonresident | 52                  | 24      | 0     | 13  | 3    | 40    | 76.9%             | 6.6              | 262            |                                           |
| 65 McCullough Peaks<br>(53, 54, also valid 121)<br>(53, 54, also valid 121)<br>(53, 54, also valid 121)<br>(53, 54) | Limited 1          | 42                  | 2       | 0     | 3   | 2    | 7     | 16.7%             | 27.0             | 189            | 51                                        |
|                                                                                                                     | Limited 2          | 91                  | 0       | 0     | 16  | 7    | 23    | 25.3%             | 28.3             | 652            | 150                                       |
|                                                                                                                     | Limited 5          | 45                  | 0       | 0     | 13  | 0    | 13    | 28.9%             | 22.4             | 291            | 95                                        |
|                                                                                                                     | Limited 6          | 89                  | 0       | 0     | 29  | 5    | 34    | 38.2%             | 12.9             | 438            | 150                                       |
|                                                                                                                     | Limited 7          | 93                  | 0       | 0     | 16  | 8    | 24    | 25.8%             | 15.2             | 365            | 103                                       |
|                                                                                                                     | Limited 9          | 2                   | 0       | 0     | 0   | 0    | 0     | 0.0%              | 0.0              | 4              | 26                                        |
|                                                                                                                     | Pooled Total       | 350                 | 2       | 0     | 77  | 22   | 101   | 28.9%             | 19.2             | 1939           |                                           |
|                                                                                                                     | Pooled Resident    | 320                 | 2       | 0     | 65  | 21   | 88    | 27.5%             | 20.5             | 1801           |                                           |
|                                                                                                                     | Pooled Nonresident | 30                  | 0       | 0     | 12  | 1    | 13    | 43.3%             | 10.6             | 138            |                                           |
| 66 Basin<br>(also valid 61)                                                                                         | Limited 2          | 2                   | 0       | 0     | 0   | 0    | 0     | 0.0%              | 0.0              | 2              |                                           |
|                                                                                                                     | General            | 105                 | 0       | 0     | 7   | 0    | 7     | 6.7%              | 71.7             | 502            |                                           |
|                                                                                                                     | Pooled Total       | 107                 | 0       | 0     | 7   | 0    | 7     | 6.5%              | 72.0             | 504            |                                           |
|                                                                                                                     | Pooled Resident    | 107                 | 0       | 0     | 7   | 0    | 7     | 6.5%              | 72.0             | 504            |                                           |
|                                                                                                                     | Pooled Nonresident | 0                   | 0       | 0     | 0   | 0    | 0     | 0.0%              | 0.0              | 0              |                                           |



TABLE I-A (Continued)  
ELK HUNT AREA REPORT

| AREA<br>(cross hunt areas) | TYPE               | ACTIVE<br>LICS/HTRS | HARVEST |       |     |      |       | HUNTER<br>SUCCESS | DAYS/<br>HARVEST | HUNTER<br>DAYS | LICENSES<br>SOLD      |
|----------------------------|--------------------|---------------------|---------|-------|-----|------|-------|-------------------|------------------|----------------|-----------------------|
|                            |                    |                     | BULL    | SPIKE | COW | CALF | TOTAL |                   |                  |                | (cross hunt<br>incl.) |
| 67 Wiggins Fork            |                    |                     |         |       |     |      |       |                   |                  |                |                       |
| (68)                       | Limited 2          | 213                 | 0       | 0     | 103 | 9    | 112   | 52.6%             | 11.6             | 1304           | 255                   |
| (68, 69)                   | Limited 9          | 74                  | 8       | 0     | 0   | 0    | 8     | 10.8%             | 68.3             | 546            | 129                   |
|                            | General            | 1032                | 238     | 90    | 0   | 0    | 328   | 31.8%             | 18.8             | 6157           |                       |
|                            | Pooled Total       | 1319                | 246     | 90    | 103 | 9    | 448   | 34.0%             | 17.9             | 8007           |                       |
|                            | Pooled Resident    | 1099                | 186     | 80    | 84  | 9    | 359   | 32.7%             | 18.7             | 6727           |                       |
|                            | Pooled Nonresident | 220                 | 60      | 10    | 19  | 0    | 89    | 40.5%             | 14.4             | 1280           |                       |
| 68 Warm Springs            |                    |                     |         |       |     |      |       |                   |                  |                |                       |
| (67)                       | Limited 2          | 49                  | 0       | 0     | 12  | 0    | 12    | 24.5%             | 14.3             | 171            | 255                   |
| (67, 69)                   | Limited 9          | 55                  | 6       | 0     | 2   | 1    | 9     | 16.4%             | 47.9             | 431            | 129                   |
|                            | General            | 541                 | 80      | 26    | 0   | 0    | 106   | 19.6%             | 31.1             | 3298           |                       |
|                            | Pooled Total       | 645                 | 86      | 26    | 14  | 1    | 127   | 19.7%             | 30.7             | 3900           |                       |
|                            | Pooled Resident    | 537                 | 80      | 26    | 9   | 0    | 115   | 21.4%             | 27.9             | 3214           |                       |
|                            | Pooled Nonresident | 108                 | 6       | 0     | 5   | 1    | 12    | 11.1%             | 57.2             | 686            |                       |
| 69 Whiskey Mountain        |                    |                     |         |       |     |      |       |                   |                  |                |                       |
| (67, 68)                   | Limited 6          | 36                  | 0       | 0     | 11  | 2    | 13    | 36.1%             | 13.6             | 177.0          | 50                    |
|                            | Limited 9          | 15                  | 0       | 0     | 0   | 0    | 0     | 0.0%              | 0.0              | 72             | 129                   |
|                            | General            | 279                 | 58      | 0     | 32  | 8    | 98    | 35.1%             | 14.1             | 1380           |                       |
|                            | Pooled Total       | 319                 | 58      | 0     | 43  | 10   | 111   | 34.8%             | 14.7             | 1629           |                       |
|                            | Pooled Resident    | 245                 | 32      | 0     | 41  | 10   | 83    | 33.9%             | 14.3             | 1189           |                       |
|                            | Pooled Nonresident | 74                  | 26      | 0     | 2   | 0    | 28    | 37.8%             | 15.7             | 440            |                       |
| 70 Buffalo Fork            |                    |                     |         |       |     |      |       |                   |                  |                |                       |
|                            | General            | 554                 | 160     | 4     | 0   | 0    | 164   | 29.6%             | 20.7             | 3401           |                       |
|                            | Pooled Total       | 554                 | 160     | 4     | 0   | 0    | 164   | 29.6%             | 20.7             | 3401           |                       |
|                            | Pooled Resident    | 410                 | 85      | 4     | 0   | 0    | 89    | 21.7%             | 29.9             | 2660           |                       |
|                            | Pooled Nonresident | 144                 | 75      | 0     | 0   | 0    | 75    | 52.1%             | 9.9              | 741            |                       |
| 71 Pacific Creek           |                    |                     |         |       |     |      |       |                   |                  |                |                       |
|                            | General            | 340                 | 82      | 7     | 0   | 0    | 89    | 26.2%             | 25.3             | 2248           |                       |
|                            | Pooled Total       | 340                 | 82      | 7     | 0   | 0    | 89    | 26.2%             | 25.3             | 2248           |                       |
|                            | Pooled Resident    | 176                 | 23      | 7     | 0   | 0    | 30    | 17.0%             | 41.1             | 1232           |                       |
|                            | Pooled Nonresident | 164                 | 59      | 0     | 0   | 0    | 59    | 36.0%             | 17.2             | 1016           |                       |
| 73 Targhee-Alta            |                    |                     |         |       |     |      |       |                   |                  |                |                       |
|                            | Limited 2          | 7                   | 0       | 0     | 0   | 0    | 0     | 0.0%              | 0.0              | 35             | 9                     |
|                            | Limited 6          | 32                  | 0       | 0     | 3   | 3    | 6     | 18.8%             | 37.0             | 222            | 49                    |
|                            | General            | 281                 | 74      | 7     | 7   | 0    | 88    | 31.3%             | 21.1             | 1854           |                       |
|                            | Pooled Total       | 315                 | 74      | 7     | 10  | 3    | 94    | 29.8%             | 22.5             | 2111           |                       |
|                            | Pooled Resident    | 179                 | 22      | 7     | 10  | 0    | 39    | 21.8%             | 33.8             | 1318           |                       |
|                            | Pooled Nonresident | 136                 | 52      | 0     | 0   | 3    | 55    | 40.4%             | 14.4             | 793            |                       |
| 74 Ditch Creek             |                    |                     |         |       |     |      |       |                   |                  |                |                       |
|                            | General            | 143                 | 14      | 0     | 8   | 8    | 30    | 21.0%             | 31.9             | 956            |                       |
|                            | Pooled Total       | 143                 | 14      | 0     | 8   | 8    | 30    | 21.0%             | 31.9             | 956            |                       |
|                            | Pooled Resident    | 127                 | 11      | 0     | 8   | 8    | 27    | 21.3%             | 32.7             | 884            |                       |
|                            | Pooled Nonresident | 16                  | 3       | 0     | 0   | 0    | 3     | 18.8%             | 24.0             | 72             |                       |
| 75 Snake River             |                    |                     |         |       |     |      |       |                   |                  |                |                       |
|                            | Limited 1          | 102                 | 44      | 6     | 7   | 2    | 59    | 57.8%             | 14.6             | 861            | 106                   |
| (also valid 79)            | Limited 2          | 240                 | 0       | 0     | 57  | 15   | 72    | 30.0%             | 21.3             | 1532           | 240                   |
| (also valid 79)            | Limited 6          | 132                 | 0       | 0     | 64  | 4    | 68    | 51.5%             | 10.2             | 696            |                       |
|                            | Pooled Total       | 474                 | 44      | 6     | 128 | 21   | 199   | 42.0%             | 15.5             | 3089           |                       |
|                            | Pooled Resident    | 292                 | 29      | 6     | 60  | 6    | 101   | 34.6%             | 19.9             | 2009           |                       |
|                            | Pooled Nonresident | 182                 | 15      | 0     | 68  | 15   | 98    | 53.8%             | 11.0             | 1080           |                       |

TABLE I-A (Continued)  
ELK HUNT AREA REPORT

| AREA<br>(cross hunt areas) | TYPE      | ACTIVE<br>LICS/HTRS | HARVEST |       |     |      |       | HUNTER<br>SUCCESS | DAYS/<br>HARVEST | HUNTER<br>DAYS | LICENSES                      |
|----------------------------|-----------|---------------------|---------|-------|-----|------|-------|-------------------|------------------|----------------|-------------------------------|
|                            |           |                     | BULL    | SPIKE | COW | CALF | TOTAL |                   |                  |                | SOLD<br>(cross hunt<br>incl.) |
| 77 National Elk Refuge     |           |                     |         |       |     |      |       |                   |                  |                |                               |
| (also valid limited)       | Limited 1 | 33                  | 5       | 0     | 2   | 3    | 10    | 30.3%             | 8.5              | 85             |                               |
| (also valid limited)       | Limited 2 | 46                  | 0       | 0     | 22  | 0    | 22    | 47.8%             | 7.0              | 154            |                               |
| (also valid limited)       | Limited 3 | 0                   | 0       | 0     | 0   | 0    | 0     | 0.0%              | 0.0              | 0              |                               |
| (also valid limited)       | Limited 4 | 0                   | 0       | 0     | 0   | 0    | 0     | 0.0%              | 0.0              | 0              |                               |
| (also valid limited)       | Limited 5 | 0                   | 0       | 0     | 0   | 0    | 0     | 0.0%              | 0.0              | 0              |                               |
| (also valid limited)       | Limited 6 | 94                  | 0       | 0     | 31  | 6    | 37    | 39.4%             | 12.8             | 473            |                               |
| (also valid limited)       | Limited 7 | 0                   | 0       | 0     | 0   | 0    | 0     | 0.0%              | 0.0              | 0              |                               |
| (also valid limited)       | Limited 8 | 0                   | 0       | 0     | 0   | 0    | 0     | 0.0%              | 0.0              | 0              |                               |
|                            | General   | 263                 | 23      | 12    | 61  | 21   | 117   | 44.5%             | 9.5              | 1117           |                               |
| Pooled Total               |           | 422                 | 28      | 12    | 116 | 30   | 186   | 44.1%             | 9.8              | 1829           |                               |
| Pooled Resident            |           | 355                 | 20      | 12    | 98  | 30   | 160   | 45.1%             | 10.2             | 1637           |                               |
| Pooled Nonresident         |           | 67                  | 8       | 0     | 18  | 0    | 26    | 38.8%             | 7.4              | 192            |                               |
| 78 Wilson                  |           |                     |         |       |     |      |       |                   |                  |                |                               |
|                            | Limited 1 | 27                  | 24      | 0     | 0   | 0    | 24    | 88.9%             | 9.2              | 221            | 27                            |
|                            | Limited 2 | 14                  | 0       | 0     | 7   | 2    | 9     | 64.3%             | 7.4              | 67             | 25                            |
|                            | Limited 6 | 40                  | 0       | 0     | 18  | 2    | 20    | 50.0%             | 11.0             | 220            | 75                            |
| Pooled Total               |           | 78                  | 24      | 0     | 25  | 4    | 53    | 67.9%             | 9.6              | 508            |                               |
| Pooled Resident            |           | 63                  | 20      | 0     | 22  | 4    | 46    | 73.0%             | 10.3             | 473            |                               |
| Pooled Nonresident         |           | 15                  | 4       | 0     | 3   | 0    | 7     | 46.7%             | 5.0              | 35             |                               |
| 79 Teton Park              |           |                     |         |       |     |      |       |                   |                  |                |                               |
|                            | Limited 1 | 178                 | 44      | 9     | 12  | 3    | 68    | 38.2%             | 16.4             | 1115           | 200                           |
|                            | Limited 2 | 48                  | 0       | 0     | 20  | 0    | 20    | 41.7%             | 13.5             | 269            | 58                            |
|                            | Limited 6 | 154                 | 0       | 0     | 21  | 0    | 21    | 13.6%             | 33.6             | 705            | 300                           |
| Pooled Total               |           | 371                 | 44      | 9     | 53  | 3    | 109   | 29.4%             | 19.2             | 2089           |                               |
| Pooled Resident            |           | 233                 | 34      | 9     | 18  | 3    | 64    | 27.5%             | 21.4             | 1370           |                               |
| Pooled Nonresident         |           | 138                 | 10      | 0     | 35  | 0    | 45    | 32.6%             | 16.0             | 719            |                               |
| 80 Sheep Creek             |           |                     |         |       |     |      |       |                   |                  |                |                               |
|                            | Limited 2 | 6                   | 0       | 0     | 2   | 2    | 4     | 66.7%             | 8.8              | 35             | 7                             |
|                            | General   | 498                 | 40      | 7     | 162 | 16   | 225   | 45.2%             | 11.2             | 2526           |                               |
| Pooled Total               |           | 504                 | 40      | 7     | 164 | 18   | 229   | 45.4%             | 11.2             | 2561           |                               |
| Pooled Resident            |           | 475                 | 34      | 7     | 159 | 16   | 216   | 45.5%             | 11.2             | 2412           |                               |
| Pooled Nonresident         |           | 29                  | 6       | 0     | 5   | 2    | 13    | 44.8%             | 11.5             | 149            |                               |
| 81 Spread Creek            |           |                     |         |       |     |      |       |                   |                  |                |                               |
|                            | Limited 2 | 28                  | 0       | 0     | 5   | 0    | 5     | 17.9%             | 48.2             | 241            | 28                            |
|                            | General   | 951                 | 153     | 0     | 131 | 24   | 308   | 32.4%             | 17.5             | 5389           |                               |
| Pooled Total               |           | 979                 | 153     | 0     | 136 | 24   | 313   | 32.0%             | 18.0             | 5630           |                               |
| Pooled Resident            |           | 741                 | 88      | 0     | 111 | 24   | 223   | 30.1%             | 19.0             | 4245           |                               |
| Pooled Nonresident         |           | 238                 | 65      | 0     | 25  | 0    | 90    | 37.8%             | 15.4             | 1385           |                               |
| 82 Crystal Peak            |           |                     |         |       |     |      |       |                   |                  |                |                               |
|                            | Limited 2 | 25                  | 0       | 0     | 8   | 3    | 11    | 44.0%             | 12.3             | 135            | 25                            |
|                            | General   | 476                 | 103     | 0     | 61  | 6    | 170   | 35.7%             | 14.2             | 2419           |                               |
| Pooled Total               |           | 501                 | 103     | 0     | 69  | 9    | 181   | 36.1%             | 14.1             | 2554           |                               |
| Pooled Resident            |           | 394                 | 61      | 0     | 59  | 6    | 126   | 32.0%             | 15.7             | 1977           |                               |
| Pooled Nonresident         |           | 107                 | 42      | 0     | 10  | 3    | 55    | 51.4%             | 10.5             | 577            |                               |
| 83 Fish Creek              |           |                     |         |       |     |      |       |                   |                  |                |                               |
|                            | Limited 2 | 30                  | 0       | 0     | 11  | 6    | 17    | 56.7%             | 9.7              | 165            | 31                            |
|                            | General   | 588                 | 86      | 0     | 83  | 16   | 185   | 31.5%             | 18.5             | 3415           |                               |
| Pooled Total               |           | 618                 | 86      | 0     | 94  | 22   | 202   | 32.7%             | 17.7             | 3580           |                               |
| Pooled Resident            |           | 540                 | 70      | 0     | 74  | 16   | 160   | 29.6%             | 19.4             | 3101           |                               |
| Pooled Nonresident         |           | 78                  | 16      | 0     | 20  | 6    | 42    | 53.8%             | 11.4             | 479            |                               |
| 84 Lower Hoback            |           |                     |         |       |     |      |       |                   |                  |                |                               |
|                            | Limited 1 | 8                   | 3       | 1     | 0   | 0    | 4     | 50.0%             | 9.0              | 36             | 22                            |
|                            | Limited 2 | 42                  | 0       | 0     | 9   | 2    | 11    | 26.2%             | 25.5             | 281            | 49                            |
|                            | Limited 6 | 221                 | 0       | 0     | 49  | 17   | 66    | 29.9%             | 24.4             | 1611           | 275                           |
|                            | General   | 1159                | 194     | 68    | 123 | 36   | 421   | 36.3%             | 16.5             | 6955           |                               |
| Pooled Total               |           | 1391                | 197     | 69    | 181 | 55   | 502   | 36.1%             | 17.7             | 8883           |                               |
| Pooled Resident            |           | 1020                | 112     | 48    | 132 | 47   | 339   | 33.2%             | 19.2             | 6510           |                               |
| Pooled Nonresident         |           | 371                 | 85      | 21    | 49  | 8    | 163   | 43.9%             | 14.6             | 2373           |                               |

TABLE I-A (Continued)  
ELK HUNT AREA REPORT

| AREA<br>(cross hunt areas)                                 | TYPE                | ACTIVE<br>LICS/HTRS | HARVEST |       |     |      |       | HUNTER<br>SUCCESS | DAYS/<br>HARVEST | HUNTER<br>DAYS | LICENSES                      |
|------------------------------------------------------------|---------------------|---------------------|---------|-------|-----|------|-------|-------------------|------------------|----------------|-------------------------------|
|                                                            |                     |                     | BULL    | SPIKE | COW | CALF | TOTAL |                   |                  |                | SOLD<br>(cross hunt<br>incl.) |
|                                                            |                     |                     |         |       |     |      |       |                   |                  |                |                               |
| 85 Fall Creek                                              | Limited 1           | 12                  | 2       | 0     | 0   | 0    | 2     | 16.7%             | 83.0             | 166            | 20                            |
|                                                            | Limited 2           | 44                  | 0       | 0     | 14  | 3    | 17    | 38.6%             | 19.9             | 338            | 50                            |
|                                                            | Limited 6           | 233                 | 0       | 0     | 85  | 18   | 103   | 44.2%             | 16.3             | 1683           | 277                           |
|                                                            | General             | 976                 | 162     | 33    | 97  | 18   | 310   | 31.8%             | 19.2             | 5950           |                               |
|                                                            | Pooled Total        | 1228                | 164     | 33    | 196 | 39   | 432   | 35.2%             | 18.8             | 8137           |                               |
|                                                            | Pooled Resident     | 886                 | 89      | 26    | 137 | 28   | 280   | 31.6%             | 21.6             | 6054           |                               |
|                                                            | Pooled Nonresident  | 342                 | 75      | 7     | 59  | 11   | 152   | 44.4%             | 13.7             | 2083           |                               |
|                                                            |                     |                     |         |       |     |      |       |                   |                  |                |                               |
| 86 Monument Ridge                                          | General             | 325                 | 59      | 12    | 28  | 9    | 108   | 33.2%             | 16.0             | 1730           |                               |
|                                                            | Pooled Total        | 325                 | 59      | 12    | 28  | 9    | 108   | 33.2%             | 16.0             | 1730           |                               |
|                                                            | Pooled Resident     | 250                 | 23      | 12    | 22  | 9    | 66    | 26.4%             | 20.3             | 1343           |                               |
|                                                            | Pooled Nonresident  | 75                  | 36      | 0     | 6   | 0    | 42    | 56.0%             | 9.2              | 387            |                               |
|                                                            |                     |                     |         |       |     |      |       |                   |                  |                |                               |
| 87 Raspberry Ridge                                         | Limited 6           | 21                  | 0       | 0     | 5   | 4    | 9     | 42.9%             | 13.3             | 120            | 56                            |
|                                                            | General             | 590                 | 66      | 48    | 40  | 4    | 158   | 26.8%             | 24.4             | 3853           |                               |
|                                                            | Pooled Total        | 607                 | 66      | 48    | 45  | 8    | 167   | 27.5%             | 23.8             | 3973           |                               |
|                                                            | Pooled Resident     | 551                 | 56      | 41    | 42  | 4    | 143   | 26.0%             | 24.9             | 3565           |                               |
|                                                            | Pooled Nonresident  | 56                  | 10      | 7     | 3   | 4    | 24    | 42.9%             | 17.0             | 408            |                               |
|                                                            |                     |                     |         |       |     |      |       |                   |                  |                |                               |
|                                                            | 88 Greys Feedground | Limited 1           | 51      | 5     | 2   | 8    | 2     | 17                | 33.3%            | 24.4           | 415                           |
| Pooled Total                                               |                     | 51                  | 5       | 2     | 8   | 2    | 17    | 33.3%             | 24.4             | 415            |                               |
| Pooled Resident                                            |                     | 43                  | 2       | 2     | 8   | 2    | 14    | 32.6%             | 24.3             | 340            |                               |
| Pooled Nonresident                                         |                     | 8                   | 3       | 0     | 0   | 0    | 3     | 37.5%             | 25.0             | 75             |                               |
|                                                            |                     |                     |         |       |     |      |       |                   |                  |                |                               |
| 89 Lower Greys River                                       | General             | 978                 | 146     | 15    | 78  | 15   | 254   | 26.0%             | 18.0             | 4576           |                               |
|                                                            | Pooled Total        | 978                 | 146     | 15    | 78  | 15   | 254   | 26.0%             | 18.0             | 4576           |                               |
|                                                            | Pooled Resident     | 749                 | 84      | 12    | 78  | 15   | 189   | 25.2%             | 18.5             | 3503           |                               |
|                                                            | Pooled Nonresident  | 229                 | 62      | 3     | 0   | 0    | 65    | 28.4%             | 16.5             | 1073           |                               |
|                                                            |                     |                     |         |       |     |      |       |                   |                  |                |                               |
| 90 Upper Greys River                                       | Limited 6           | 75                  | 0       | 0     | 11  | 4    | 15    | 20.0%             | 46.1             | 692            | 101                           |
|                                                            | General             | 805                 | 85      | 22    | 61  | 16   | 184   | 22.9%             | 23.7             | 4367           |                               |
|                                                            | Pooled Total        | 867                 | 85      | 22    | 72  | 20   | 199   | 23.0%             | 25.4             | 5059           |                               |
|                                                            | Pooled Resident     | 687                 | 33      | 16    | 62  | 16   | 127   | 18.5%             | 30.4             | 3863           |                               |
|                                                            | Pooled Nonresident  | 180                 | 52      | 6     | 10  | 4    | 72    | 40.0%             | 16.6             | 1196           |                               |
|                                                            |                     |                     |         |       |     |      |       |                   |                  |                |                               |
| 91 Salt River                                              | Limited 1           | 296                 | 34      | 6     | 96  | 12   | 148   | 50.0%             | 16.8             | 2486           | 355                           |
|                                                            | Limited 6           | 67                  | 0       | 0     | 24  | 4    | 28    | 41.8%             | 14.1             | 394            | 100                           |
|                                                            | General             | 654                 | 91      | 11    | 43  | 3    | 148   | 22.6%             | 23.5             | 3480           |                               |
|                                                            | Pooled Total        | 984                 | 125     | 17    | 163 | 19   | 324   | 32.9%             | 19.6             | 6360           |                               |
|                                                            | Pooled Resident     | 770                 | 75      | 11    | 159 | 17   | 262   | 34.0%             | 19.6             | 5144           |                               |
|                                                            | Pooled Nonresident  | 214                 | 50      | 6     | 4   | 2    | 62    | 29.0%             | 19.6             | 1216           |                               |
|                                                            |                     |                     |         |       |     |      |       |                   |                  |                |                               |
| 92 Piney-Horse Creek<br>(also valid 94)<br>(also valid 94) | Limited 1           | 3                   | 0       | 0     | 0   | 0    | 0     | 0.0%              | 0.0              | 16             |                               |
|                                                            | Limited 6           | 121                 | 0       | 0     | 55  | 17   | 72    | 59.5%             | 11.2             | 805            | 203                           |
|                                                            | General             | 1053                | 160     | 35    | 139 | 33   | 367   | 34.9%             | 18.4             | 6747           |                               |
|                                                            | Pooled Total        | 1145                | 160     | 35    | 194 | 50   | 439   | 38.3%             | 17.2             | 7568           |                               |
|                                                            | Pooled Resident     | 966                 | 114     | 25    | 152 | 45   | 336   | 34.8%             | 19.7             | 6616           |                               |
|                                                            | Pooled Nonresident  | 179                 | 46      | 10    | 42  | 5    | 103   | 57.5%             | 9.2              | 952            |                               |
|                                                            |                     |                     |         |       |     |      |       |                   |                  |                |                               |
| 93 Waterdog Lakes                                          | Limited 1           | 142                 | 20      | 7     | 14  | 7    | 48    | 33.8%             | 21.5             | 1034           | 155                           |
|                                                            | Limited 2           | 24                  | 0       | 0     | 8   | 2    | 10    | 41.7%             | 15.5             | 155            | 26                            |
|                                                            | Limited 6           | 118                 | 0       | 0     | 44  | 3    | 47    | 39.8%             | 17.1             | 806            | 140                           |
|                                                            | Pooled Total        | 269                 | 20      | 7     | 66  | 12   | 105   | 39.0%             | 19.0             | 1995           |                               |
|                                                            | Pooled Resident     | 186                 | 18      | 7     | 47  | 10   | 82    | 44.1%             | 17.5             | 1439           |                               |
|                                                            | Pooled Nonresident  | 83                  | 2       | 0     | 19  | 2    | 23    | 27.7%             | 24.2             | 556            |                               |

TABLE I-A (Continued)  
ELK HUNT AREA REPORT

| AREA<br>(cross hunt areas)                                           | TYPE               | ACTIVE<br>LICS/HTRS | HARVEST |       |     |      |       | HUNTER<br>SUCCESS | DAYS/<br>HARVEST | HUNTER<br>DAYS | LICENSES<br>SOLD<br>(cross hunt<br>incl.) |
|----------------------------------------------------------------------|--------------------|---------------------|---------|-------|-----|------|-------|-------------------|------------------|----------------|-------------------------------------------|
|                                                                      |                    |                     | BULL    | SPIKE | COW | CALF | TOTAL |                   |                  |                |                                           |
| 94 South Piney                                                       | Limited 1          | 47                  | 6       | 0     | 7   | 0    | 13    | 27.7%             | 29.5             | 384            | 62                                        |
|                                                                      | Limited 6          | 221                 | 0       | 0     | 49  | 26   | 75    | 33.9%             | 20.1             | 1505           | 276                                       |
|                                                                      | General            | 1422                | 163     | 76    | 132 | 45   | 416   | 29.3%             | 20.9             | 8705           |                                           |
|                                                                      | Pooled Total       | 1625                | 169     | 76    | 188 | 71   | 504   | 31.0%             | 21.0             | 10594          |                                           |
|                                                                      | Pooled Resident    | 1427                | 137     | 69    | 157 | 71   | 434   | 30.4%             | 21.8             | 9476           |                                           |
|                                                                      | Pooled Nonresident | 198                 | 32      | 7     | 31  | 0    | 70    | 35.4%             | 16.0             | 1118           |                                           |
| 95 Green River                                                       | Limited 1          | 152                 | 49      | 8     | 16  | 0    | 73    | 48.0%             | 17.2             | 1258           | 155                                       |
|                                                                      | Limited 2          | 240                 | 0       | 0     | 79  | 22   | 101   | 42.1%             | 15.3             | 1548           | 248                                       |
|                                                                      | Limited 3          | 26                  | 12      | 0     | 2   | 0    | 14    | 53.8%             | 15.9             | 222            | 32                                        |
|                                                                      | Limited 4          | 10                  | 0       | 0     | 4   | 0    | 4     | 40.0%             | 7.3              | 29             | 11                                        |
|                                                                      | Limited 6          | 22                  | 0       | 0     | 5   | 0    | 5     | 22.7%             | 30.0             | 150            | 25                                        |
|                                                                      | Pooled Total       | 434                 | 61      | 8     | 106 | 22   | 197   | 45.4%             | 16.3             | 3207           |                                           |
|                                                                      | Pooled Resident    | 348                 | 44      | 6     | 73  | 22   | 145   | 41.7%             | 18.0             | 2610           |                                           |
|                                                                      | Pooled Nonresident | 86                  | 17      | 2     | 33  | 0    | 52    | 60.5%             | 11.5             | 597            |                                           |
| 96 New Fork<br>(also valid 93)<br>(also valid 93)<br>(also valid 93) | Limited 1          | 189                 | 39      | 12    | 11  | 4    | 66    | 34.9%             | 23.8             | 1571           | 206                                       |
|                                                                      | Limited 2          | 9                   | 0       | 0     | 2   | 0    | 2     | 22.2%             | 40.0             | 80             | 9                                         |
|                                                                      | Limited 6          | 63                  | 0       | 0     | 15  | 2    | 17    | 27.0%             | 40.4             | 687            | 75                                        |
|                                                                      | General            | 217                 | 15      | 4     | 8   | 9    | 36    | 16.6%             | 33.2             | 1195           |                                           |
|                                                                      | Pooled Total       | 457                 | 54      | 16    | 36  | 15   | 121   | 26.5%             | 29.2             | 3533           |                                           |
|                                                                      | Pooled Resident    | 360                 | 34      | 16    | 33  | 11   | 94    | 26.1%             | 31.7             | 2984           |                                           |
|                                                                      | Pooled Nonresident | 97                  | 20      | 0     | 3   | 4    | 27    | 27.8%             | 20.3             | 549            |                                           |
| 97 Pinedale                                                          | Limited 1          | 265                 | 82      | 12    | 25  | 0    | 119   | 44.9%             | 13.4             | 1597           | 301                                       |
|                                                                      | Limited 2          | 15                  | 0       | 0     | 0   | 0    | 0     | 0.0%              | 0.0              | 79             | 16                                        |
|                                                                      | Limited 6          | 58                  | 0       | 0     | 12  | 0    | 12    | 20.7%             | 28.7             | 344            | 75                                        |
|                                                                      | General            | 230                 | 34      | 4     | 18  | 4    | 60    | 26.1%             | 18.5             | 1110           |                                           |
|                                                                      | Pooled Total       | 547                 | 116     | 16    | 55  | 4    | 191   | 34.9%             | 16.4             | 3130           |                                           |
|                                                                      | Pooled Resident    | 325                 | 55      | 4     | 46  | 4    | 109   | 33.5%             | 16.6             | 1811           |                                           |
|                                                                      | Pooled Nonresident | 222                 | 61      | 12    | 9   | 0    | 82    | 36.9%             | 16.1             | 1319           |                                           |
| 98 Boulder                                                           | Limited 1          | 334                 | 75      | 10    | 28  | 10   | 123   | 36.8%             | 20.7             | 2546           | 353                                       |
|                                                                      | Limited 2          | 59                  | 0       | 0     | 6   | 5    | 11    | 18.6%             | 31.0             | 341            | 86                                        |
|                                                                      | Limited 6          | 106                 | 0       | 0     | 23  | 8    | 31    | 29.2%             | 24.9             | 772            | 151                                       |
|                                                                      | General            | 345                 | 42      | 4     | 9   | 0    | 55    | 15.9%             | 31.3             | 1722           |                                           |
|                                                                      | Pooled Total       | 811                 | 117     | 14    | 66  | 23   | 220   | 27.1%             | 24.5             | 5381           |                                           |
|                                                                      | Pooled Resident    | 669                 | 79      | 10    | 56  | 17   | 162   | 24.2%             | 28.5             | 4621           |                                           |
|                                                                      | Pooled Nonresident | 142                 | 38      | 4     | 10  | 6    | 58    | 40.8%             | 13.1             | 760            |                                           |
| 99 Big Sandy                                                         | Limited 1          | 157                 | 47      | 12    | 0   | 0    | 59    | 37.6%             | 20.5             | 1208           | 179                                       |
|                                                                      | Limited 2          | 216                 | 0       | 0     | 23  | 0    | 23    | 10.6%             | 74.6             | 1716           | 228                                       |
|                                                                      | Pooled Total       | 373                 | 47      | 12    | 23  | 0    | 82    | 22.0%             | 35.7             | 2924           |                                           |
|                                                                      | Pooled Resident    | 317                 | 28      | 12    | 23  | 0    | 63    | 19.9%             | 41.8             | 2631           |                                           |
|                                                                      | Pooled Nonresident | 56                  | 19      | 0     | 0   | 0    | 19    | 33.9%             | 15.4             | 293            |                                           |
| 100 Steamboat                                                        | Limited 1          | 233                 | 192     | 0     | 0   | 0    | 192   | 82.4%             | 7.3              | 1396           | 233                                       |
|                                                                      | Limited 2          | 194                 | 0       | 0     | 126 | 27   | 153   | 78.9%             | 5.0              | 759            | 202                                       |
|                                                                      | Pooled Total       | 427                 | 192     | 0     | 126 | 27   | 345   | 80.8%             | 6.2              | 2155           |                                           |
|                                                                      | Pooled Resident    | 369                 | 157     | 0     | 114 | 23   | 294   | 79.7%             | 6.7              | 1969           |                                           |
|                                                                      | Pooled Nonresident | 58                  | 35      | 0     | 12  | 4    | 51    | 87.9%             | 3.6              | 186            |                                           |
| 102 West Green River                                                 | General            | 1548                | 193     | 86    | 222 | 44   | 545   | 35.2%             | 15.4             | 8391           |                                           |
|                                                                      | Pooled Total       | 1548                | 193     | 86    | 222 | 44   | 545   | 35.2%             | 15.4             | 8391           |                                           |
|                                                                      | Pooled Resident    | 1446                | 174     | 76    | 199 | 44   | 493   | 34.1%             | 15.9             | 7833           |                                           |
|                                                                      | Pooled Nonresident | 102                 | 19      | 10    | 23  | 0    | 52    | 51.0%             | 10.7             | 558            |                                           |

TABLE I-A (Continued)  
ELK HUNT AREA REPORT

| AREA<br>(cross hunt areas) | TYPE               | ACTIVE<br>LICS/HTRS | HARVEST |       |     |      |       | HUNTER<br>SUCCESS | DAYS/<br>HARVEST | HUNTER<br>DAYS | LICENSES<br>SOLD<br>(cross hunt<br>incl.) |
|----------------------------|--------------------|---------------------|---------|-------|-----|------|-------|-------------------|------------------|----------------|-------------------------------------------|
|                            |                    |                     | BULL    | SPIKE | COW | CALF | TOTAL |                   |                  |                |                                           |
| 103 Raymond Mountain       |                    |                     |         |       |     |      |       |                   |                  |                |                                           |
|                            | Limited 6          | 29                  | 0       | 0     | 12  | 1    | 13    | 44.8%             | 6.5              | 84             | 53                                        |
|                            | General            | 381                 | 37      | 18    | 67  | 14   | 136   | 35.7%             | 11.7             | 1591           |                                           |
|                            | Pooled Total       | 405                 | 37      | 18    | 79  | 15   | 149   | 36.8%             | 11.2             | 1675           |                                           |
|                            | Pooled Resident    | 340                 | 24      | 15    | 71  | 14   | 124   | 36.5%             | 10.6             | 1313           |                                           |
|                            | Pooled Nonresident | 65                  | 13      | 3     | 8   | 1    | 25    | 38.5%             | 14.5             | 362            |                                           |
| 104 Lincoln                |                    |                     |         |       |     |      |       |                   |                  |                |                                           |
|                            | Limited 6          | 125                 | 0       | 0     | 39  | 29   | 68    | 54.4%             | 10.3             | 699            | 151                                       |
|                            | General            | 1136                | 178     | 48    | 120 | 45   | 391   | 34.4%             | 14.7             | 5749           |                                           |
|                            | Pooled Total       | 1228                | 178     | 48    | 159 | 74   | 459   | 37.4%             | 14.0             | 6448           |                                           |
|                            | Pooled Resident    | 1099                | 145     | 45    | 143 | 61   | 394   | 35.9%             | 14.7             | 5777           |                                           |
|                            | Pooled Nonresident | 129                 | 33      | 3     | 16  | 13   | 65    | 50.4%             | 10.3             | 671            |                                           |
| 105 Carter Lease           |                    |                     |         |       |     |      |       |                   |                  |                |                                           |
|                            | General            | 422                 | 43      | 15    | 31  | 11   | 100   | 23.7%             | 19.3             | 1932           |                                           |
|                            | Pooled Total       | 422                 | 43      | 15    | 31  | 11   | 100   | 23.7%             | 19.3             | 1932           |                                           |
|                            | Pooled Resident    | 419                 | 43      | 15    | 31  | 11   | 100   | 23.9%             | 19.1             | 1906           |                                           |
|                            | Pooled Nonresident | 3                   | 0       | 0     | 0   | 0    | 0     | 0.0%              | 0.0              | 26             |                                           |
| 106 Uinta                  |                    |                     |         |       |     |      |       |                   |                  |                |                                           |
|                            | Limited 1          | 30                  | 17      | 5     | 3   | 0    | 25    | 83.3%             | 10.0             | 250            | 34                                        |
|                            | Limited 2          | 98                  | 0       | 0     | 21  | 2    | 23    | 23.5%             | 22.6             | 520            | 149                                       |
|                            | Limited 6          | 24                  | 0       | 0     | 8   | 0    | 8     | 33.3%             | 25.8             | 206            | 25                                        |
|                            | General            | 697                 | 133     | 25    | 44  | 7    | 209   | 30.0%             | 17.9             | 3751           |                                           |
|                            | Pooled Total       | 849                 | 150     | 30    | 76  | 9    | 265   | 31.2%             | 17.8             | 4727           |                                           |
|                            | Pooled Resident    | 783                 | 123     | 30    | 66  | 7    | 226   | 28.9%             | 19.7             | 4441           |                                           |
|                            | Pooled Nonresident | 66                  | 27      | 0     | 10  | 2    | 39    | 59.1%             | 7.3              | 286            |                                           |
| 107 Hickey Mountain        |                    |                     |         |       |     |      |       |                   |                  |                |                                           |
|                            | Limited 2          | 71                  | 0       | 0     | 25  | 0    | 25    | 35.2%             | 21.5             | 538            | 101                                       |
|                            | General            | 524                 | 47      | 25    | 72  | 4    | 148   | 28.2%             | 14.8             | 2183           |                                           |
|                            | Pooled Total       | 595                 | 47      | 25    | 97  | 4    | 173   | 29.1%             | 15.7             | 2721           |                                           |
|                            | Pooled Resident    | 583                 | 47      | 25    | 85  | 4    | 161   | 27.6%             | 16.6             | 2674           |                                           |
|                            | Pooled Nonresident | 12                  | 0       | 0     | 12  | 0    | 12    | 100.0%            | 3.9              | 47             |                                           |
| 108 South Rawlins          |                    |                     |         |       |     |      |       |                   |                  |                |                                           |
|                            | Limited 1          | 60                  | 34      | 0     | 2   | 0    | 36    | 60.0%             | 8.4              | 302            | 61                                        |
|                            | Limited 2          | 76                  | 0       | 0     | 43  | 8    | 51    | 67.1%             | 8.1              | 411            | 84                                        |
|                            | Limited 3          | 12                  | 0       | 0     | 7   | 0    | 7     | 58.3%             | 4.9              | 34             | 13                                        |
|                            | Pooled Total       | 148                 | 34      | 0     | 52  | 8    | 94    | 63.5%             | 7.9              | 747            |                                           |
|                            | Pooled Resident    | 97                  | 18      | 0     | 26  | 7    | 51    | 52.6%             | 11.5             | 587            |                                           |
|                            | Pooled Nonresident | 51                  | 16      | 0     | 26  | 1    | 43    | 84.3%             | 3.7              | 160            |                                           |
| 110 Upper Platte River     |                    |                     |         |       |     |      |       |                   |                  |                |                                           |
|                            | Limited 2          | 68                  | 0       | 0     | 7   | 0    | 7     | 10.3%             | 53.9             | 377            | 76                                        |
| (12, 13, 15)               | Limited 6          | 32                  | 0       | 0     | 23  | 2    | 25    | 78.1%             | 5.5              | 138            | 75                                        |
|                            | General            | 1738                | 156     | 41    | 136 | 33   | 366   | 21.1%             | 28.9             | 10576          |                                           |
|                            | Pooled Total       | 1833                | 156     | 41    | 166 | 35   | 398   | 21.7%             | 27.9             | 11091          |                                           |
|                            | Pooled Resident    | 1724                | 140     | 41    | 159 | 35   | 375   | 21.8%             | 27.7             | 10390          |                                           |
|                            | Pooled Nonresident | 109                 | 16      | 0     | 7   | 0    | 23    | 21.1%             | 30.5             | 701            |                                           |
| 111 Seminole               |                    |                     |         |       |     |      |       |                   |                  |                |                                           |
|                            | Limited 1          | 43                  | 34      | 2     | 0   | 0    | 36    | 83.7%             | 7.1              | 257            | 47                                        |
|                            | Limited 2          | 87                  | 0       | 0     | 27  | 4    | 31    | 35.6%             | 16.2             | 503            | 95                                        |
|                            | Limited 3          | 38                  | 0       | 0     | 2   | 2    | 4     | 10.5%             | 47.0             | 188            | 53                                        |
|                            | Pooled Total       | 168                 | 34      | 2     | 29  | 6    | 71    | 42.3%             | 13.4             | 948            |                                           |
|                            | Pooled Resident    | 137                 | 24      | 2     | 20  | 6    | 52    | 38.0%             | 16.1             | 839            |                                           |
|                            | Pooled Nonresident | 31                  | 10      | 0     | 9   | 0    | 19    | 61.3%             | 5.7              | 109            |                                           |
| 113 Rochelle Hills         |                    |                     |         |       |     |      |       |                   |                  |                |                                           |
|                            | Limited 1          | 47                  | 37      | 2     | 3   | 0    | 42    | 89.4%             | 4.7              | 199            | 47                                        |
|                            | Limited 2          | 56                  | 0       | 0     | 42  | 6    | 48    | 85.7%             | 2.9              | 138            | 61                                        |
|                            | Pooled Total       | 103                 | 37      | 2     | 45  | 6    | 90    | 87.4%             | 3.7              | 337            |                                           |
|                            | Pooled Resident    | 84                  | 28      | 2     | 41  | 6    | 77    | 91.7%             | 3.0              | 232            |                                           |
|                            | Pooled Nonresident | 19                  | 9       | 0     | 4   | 0    | 13    | 68.4%             | 8.1              | 105            |                                           |

TABLE I-A (Continued)  
ELK HUNT AREA REPORT

| AREA<br>(cross hunt areas)           | TYPE               | ACTIVE<br>LICS/HTRS | HARVEST |       |     |      |       | HUNTER<br>SUCCESS | DAYS/<br>HARVEST | HUNTER<br>DAYS | LICENSES<br>SOLD      |
|--------------------------------------|--------------------|---------------------|---------|-------|-----|------|-------|-------------------|------------------|----------------|-----------------------|
|                                      |                    |                     | BULL    | SPIKE | COW | CALF | TOTAL |                   |                  |                | (cross hunt<br>incl.) |
|                                      |                    |                     |         |       |     |      |       |                   |                  |                |                       |
| 114 Kyle                             |                    |                     |         |       |     |      |       |                   |                  |                |                       |
|                                      | Limited 1          | 49                  | 22      | 5     | 1   | 0    | 28    | 57.1%             | 12.3             | 344            | 51                    |
|                                      | Limited 2          | 36                  | 0       | 0     | 17  | 4    | 21    | 58.3%             | 8.8              | 184            | 41                    |
|                                      | Limited 6          | 38                  | 0       | 0     | 14  | 7    | 21    | 55.3%             | 9.4              | 197            | 50                    |
|                                      | Pooled Total       | 109                 | 22      | 5     | 32  | 11   | 70    | 64.2%             | 10.4             | 725            |                       |
|                                      | Pooled Resident    | 80                  | 17      | 5     | 23  | 9    | 54    | 67.5%             | 10.3             | 556            |                       |
|                                      | Pooled Nonresident | 29                  | 5       | 0     | 9   | 2    | 16    | 55.2%             | 10.6             | 169            |                       |
|                                      |                    |                     |         |       |     |      |       |                   |                  |                |                       |
| 116 Bear Lodge                       |                    |                     |         |       |     |      |       |                   |                  |                |                       |
|                                      | Limited 1          | 164                 | 67      | 4     | 0   | 0    | 71    | 43.3%             | 31.4             | 2229           | 178                   |
|                                      | Limited 2          | 127                 | 0       | 0     | 38  | 3    | 41    | 32.3%             | 40.5             | 1662           | 150                   |
|                                      | Limited 6          | 86                  | 0       | 0     | 27  | 0    | 27    | 31.4%             | 42.2             | 1140           | 100                   |
|                                      | Pooled Total       | 353                 | 67      | 4     | 65  | 3    | 139   | 39.4%             | 36.2             | 5031           |                       |
|                                      | Pooled Resident    | 294                 | 57      | 0     | 57  | 0    | 114   | 38.8%             | 40.5             | 4617           |                       |
|                                      | Pooled Nonresident | 59                  | 10      | 4     | 8   | 3    | 25    | 42.4%             | 16.6             | 414            |                       |
|                                      |                    |                     |         |       |     |      |       |                   |                  |                |                       |
| 117 South Black Hills                |                    |                     |         |       |     |      |       |                   |                  |                |                       |
|                                      | Limited 1          | 220                 | 145     | 14    | 19  | 0    | 178   | 80.9%             | 11.5             | 2050           | 232                   |
|                                      | Limited 2          | 160                 | 0       | 0     | 57  | 3    | 60    | 37.5%             | 24.9             | 1491           | 175                   |
|                                      | Limited 6          | 55                  | 0       | 0     | 23  | 4    | 27    | 49.1%             | 18.3             | 495            | 62                    |
|                                      | Pooled Total       | 421                 | 145     | 14    | 99  | 7    | 265   | 62.9%             | 15.2             | 4036           |                       |
|                                      | Pooled Resident    | 356                 | 110     | 14    | 82  | 6    | 212   | 59.6%             | 17.1             | 3629           |                       |
|                                      | Pooled Nonresident | 65                  | 35      | 0     | 17  | 1    | 53    | 81.5%             | 7.7              | 407            |                       |
|                                      |                    |                     |         |       |     |      |       |                   |                  |                |                       |
| 118 Shamrock Hills                   |                    |                     |         |       |     |      |       |                   |                  |                |                       |
|                                      | Limited 1          | 36                  | 27      | 0     | 0   | 0    | 27    | 75.0%             | 5.8              | 156            | 38                    |
|                                      | Limited 2          | 36                  | 0       | 0     | 9   | 2    | 11    | 30.6%             | 18.7             | 206            | 38                    |
|                                      | Limited 6          | 26                  | 0       | 0     | 12  | 2    | 14    | 53.8%             | 12.9             | 181            | 36                    |
|                                      | Pooled Total       | 90                  | 27      | 0     | 21  | 4    | 52    | 57.8%             | 10.4             | 543            |                       |
|                                      | Pooled Resident    | 72                  | 16      | 0     | 17  | 2    | 35    | 48.6%             | 11.9             | 415            |                       |
|                                      | Pooled Nonresident | 18                  | 11      | 0     | 4   | 2    | 17    | 94.4%             | 7.5              | 128            |                       |
|                                      |                    |                     |         |       |     |      |       |                   |                  |                |                       |
| 120 Buffalo Creek                    |                    |                     |         |       |     |      |       |                   |                  |                |                       |
|                                      | Limited 1          | 103                 | 42      | 3     | 8   | 0    | 53    | 51.5%             | 9.1              | 482            | 109                   |
|                                      | Limited 2          | 99                  | 0       | 0     | 40  | 11   | 51    | 51.5%             | 14.0             | 716            | 102                   |
|                                      | Limited 3          | 72                  | 0       | 0     | 24  | 0    | 24    | 33.3%             | 20.6             | 495            | 74                    |
|                                      | Pooled Total       | 274                 | 42      | 3     | 72  | 11   | 128   | 46.7%             | 13.2             | 1693           |                       |
|                                      | Pooled Resident    | 233                 | 24      | 3     | 64  | 11   | 102   | 43.8%             | 15.3             | 1562           |                       |
|                                      | Pooled Nonresident | 41                  | 18      | 0     | 8   | 0    | 26    | 63.4%             | 5.0              | 131            |                       |
|                                      |                    |                     |         |       |     |      |       |                   |                  |                |                       |
| 121 Trout Creek-Rattlesnake Mountain |                    |                     |         |       |     |      |       |                   |                  |                |                       |
|                                      | Limited 1          | 97                  | 40      | 0     | 0   | 0    | 40    | 41.2%             | 21.0             | 840            | 105                   |
| (also valid 53, 54, 65)              | Limited 2          | 99                  | 0       | 0     | 39  | 3    | 42    | 42.4%             | 10.0             | 419            | 125                   |
|                                      | Limited 3          | 27                  | 0       | 0     | 18  | 2    | 20    | 74.1%             | 3.6              | 72             | 36                    |
| (also valid 53, 54, 65)              | Limited 6          | 77                  | 0       | 0     | 19  | 2    | 21    | 27.3%             | 20.7             | 434            | 100                   |
|                                      | Pooled Total       | 293                 | 40      | 0     | 76  | 7    | 123   | 42.0%             | 14.3             | 1765           |                       |
|                                      | Pooled Resident    | 236                 | 32      | 0     | 50  | 7    | 89    | 37.7%             | 17.1             | 1519           |                       |
|                                      | Pooled Nonresident | 57                  | 8       | 0     | 26  | 0    | 34    | 59.6%             | 7.2              | 246            |                       |
|                                      |                    |                     |         |       |     |      |       |                   |                  |                |                       |
| 122 Pine Ridge                       |                    |                     |         |       |     |      |       |                   |                  |                |                       |
|                                      | Limited 1          | 48                  | 22      | 0     | 10  | 3    | 35    | 72.9%             | 10.0             | 350            | 51                    |
|                                      | Limited 2          | 0                   | 0       | 0     | 0   | 0    | 0     | 0.0%              | 0.0              | 0              | 5                     |
|                                      | Limited 6          | 33                  | 0       | 0     | 13  | 2    | 15    | 45.5%             | 8.7              | 131            | 33                    |
|                                      | Pooled Total       | 77                  | 22      | 0     | 23  | 5    | 50    | 64.9%             | 9.6              | 481            |                       |
|                                      | Pooled Resident    | 71                  | 19      | 0     | 23  | 3    | 45    | 63.4%             | 9.9              | 447            |                       |
|                                      | Pooled Nonresident | 6                   | 3       | 0     | 0   | 2    | 5     | 83.3%             | 6.8              | 34             |                       |
|                                      |                    |                     |         |       |     |      |       |                   |                  |                |                       |
| 123 Black Thunder                    |                    |                     |         |       |     |      |       |                   |                  |                |                       |
|                                      | Limited 2          | 83                  | 0       | 0     | 53  | 6    | 59    | 71.1%             | 5.7              | 338            | 100                   |
|                                      | Pooled Total       | 83                  | 0       | 0     | 53  | 6    | 59    | 71.1%             | 5.7              | 338            |                       |
|                                      | Pooled Resident    | 81                  | 0       | 0     | 53  | 6    | 59    | 72.8%             | 5.5              | 322            |                       |
|                                      | Pooled Nonresident | 2                   | 0       | 0     | 0   | 0    | 0     | 0.0%              | 0.0              | 16             |                       |

TABLE I-A (Continued)  
**ELK** HUNT AREA REPORT

| AREA<br>(cross hunt areas) | TYPE      | ACTIVE<br>LICS/HTRS | HARVEST |       |     |      |       | HUNTER<br>SUCCESS | DAYS/<br>HARVEST | HUNTER<br>DAYS | LICENSES<br>SOLD<br>(cross hunt<br>incl.) |
|----------------------------|-----------|---------------------|---------|-------|-----|------|-------|-------------------|------------------|----------------|-------------------------------------------|
|                            |           |                     | BULL    | SPIKE | COW | CALF | TOTAL |                   |                  |                |                                           |
| 124 Powder Rim             |           |                     |         |       |     |      |       |                   |                  |                |                                           |
|                            | Limited 1 | 18                  | 10      | 0     | 0   | 0    | 10    | 55.6%             | 9.2              | 92             | 18                                        |
|                            | Limited 2 | 58                  | 0       | 0     | 28  | 4    | 32    | 55.2%             | 12.2             | 390            | 62                                        |
| Pooled Total               |           | 76                  | 10      | 0     | 28  | 4    | 42    | 55.3%             | 11.5             | 482            |                                           |
| Pooled Resident            |           | 60                  | 6       | 0     | 19  | 4    | 29    | 48.3%             | 13.9             | 404            |                                           |
| Pooled Nonresident         |           | 16                  | 4       | 0     | 9   | 0    | 13    | 81.3%             | 6.0              | 78             |                                           |
| 125 Elk Mountain           |           |                     |         |       |     |      |       |                   |                  |                |                                           |
|                            | Limited 1 | 116                 | 57      | 3     | 12  | 0    | 72    | 62.1%             | 6.7              | 483            | 138                                       |
| (also valid 114)           | Limited 2 | 13                  | 0       | 0     | 2   | 0    | 2     | 15.4%             | 21.0             | 42             | 13                                        |
| (also valid 114)           | Limited 6 | 46                  | 0       | 0     | 19  | 2    | 21    | 45.7%             | 5.8              | 121            | 76                                        |
| Pooled Total               |           | 173                 | 57      | 3     | 33  | 2    | 95    | 54.9%             | 6.8              | 646            |                                           |
| Pooled Resident            |           | 89                  | 10      | 3     | 21  | 2    | 36    | 40.4%             | 10.0             | 361            |                                           |
| Pooled Nonresident         |           | 84                  | 47      | 0     | 12  | 0    | 59    | 70.2%             | 4.8              | 285            |                                           |
| 126 Flat Top               |           |                     |         |       |     |      |       |                   |                  |                |                                           |
|                            | Limited 1 | 27                  | 16      | 0     | 0   | 0    | 16    | 59.3%             | 7.7              | 123            | 27                                        |
|                            | Limited 2 | 33                  | 0       | 0     | 13  | 6    | 19    | 57.6%             | 7.9              | 151            | 35                                        |
| Pooled Total               |           | 60                  | 16      | 0     | 13  | 6    | 35    | 58.3%             | 7.8              | 274            |                                           |
| Pooled Resident            |           | 49                  | 14      | 0     | 10  | 4    | 28    | 57.1%             | 6.6              | 186            |                                           |
| Pooled Nonresident         |           | 11                  | 2       | 0     | 3   | 2    | 7     | 63.6%             | 12.6             | 88             |                                           |
| 127 Crowheart Butte        |           |                     |         |       |     |      |       |                   |                  |                |                                           |
|                            | General   | 54                  | 4       | 0     | 0   | 0    | 4     | 7.4%              | 93.3             | 373            |                                           |
| Pooled Total               |           | 54                  | 4       | 0     | 0   | 0    | 4     | 7.4%              | 93.3             | 373            |                                           |
| Pooled Resident            |           | 44                  | 4       | 0     | 0   | 0    | 4     | 9.1%              | 70.3             | 281            |                                           |
| Pooled Nonresident         |           | 10                  | 0       | 0     | 0   | 0    | 0     | 0.0%              | 0.0              | 92             |                                           |
| 128 Muskrat                |           |                     |         |       |     |      |       |                   |                  |                |                                           |
|                            | Limited 6 | 11                  | 0       | 0     | 2   | 0    | 2     | 18.2%             | 17.5             | 35             | 20                                        |
|                            | General   | 221                 | 11      | 0     | 8   | 4    | 23    | 10.4%             | 41.4             | 953            |                                           |
| Pooled Total               |           | 232                 | 11      | 0     | 10  | 4    | 25    | 10.8%             | 39.5             | 988            |                                           |
| Pooled Resident            |           | 227                 | 11      | 0     | 10  | 4    | 25    | 11.0%             | 38.6             | 966            |                                           |
| Pooled Nonresident         |           | 5                   | 0       | 0     | 0   | 0    | 0     | 0.0%              | 0.0              | 22             |                                           |
| 129 Rest of State          |           |                     |         |       |     |      |       |                   |                  |                |                                           |
|                            | Limited 6 | 60                  | 0       | 0     | 12  | 10   | 22    | 36.7%             | 24.0             | 529            | 67                                        |
|                            | General   | 635                 | 103     | 8     | 44  | 5    | 160   | 25.2%             | 30.1             | 4812           |                                           |
| Pooled Total               |           | 670                 | 103     | 8     | 56  | 15   | 182   | 27.2%             | 29.3             | 5341           |                                           |
| Pooled Resident            |           | 634                 | 90      | 8     | 51  | 15   | 164   | 25.9%             | 31.5             | 5158           |                                           |
| Pooled Nonresident         |           | 36                  | 13      | 0     | 5   | 0    | 18    | 50.0%             | 10.2             | 183            |                                           |
| 130 Bolten Rim             |           |                     |         |       |     |      |       |                   |                  |                |                                           |
|                            | General   | 22                  | 0       | 0     | 0   | 0    | 0     | 0.0%              | 0.0              | 107            |                                           |
| Pooled Total               |           | 22                  | 0       | 0     | 0   | 0    | 0     | 0.0%              | 0.0              | 107            |                                           |
| Pooled Resident            |           | 19                  | 0       | 0     | 0   | 0    | 0     | 0.0%              | 0.0              | 87             |                                           |
| Pooled Nonresident         |           | 3                   | 0       | 0     | 0   | 0    | 0     | 0.0%              | 0.0              | 20             |                                           |

TABLE I-H  
ELK HARVEST  
BY HERD UNIT  
2007

| HERD               | TYPE          | ACTIVE<br>LICS/HTRS | HARVEST |       |     |      |       | HUNTER<br>SUCCESS | DAYS/<br>HARVEST | HUNTER<br>DAYS | LICENSES<br>SOLD<br>(cross hunt<br>incl.) |
|--------------------|---------------|---------------------|---------|-------|-----|------|-------|-------------------|------------------|----------------|-------------------------------------------|
|                    |               |                     | BULL    | SPIKE | COW | CALF | TOTAL |                   |                  |                |                                           |
| 101 Targhee        | Cow/Calf      | 32                  | 0       | 0     | 3   | 3    | 6     | 18.8%             | 37.0             | 222            | 49                                        |
|                    | Limited       | 7                   | 0       | 0     | 0   | 0    | 0     | 0.0%              | 0.0              | 35             | 9                                         |
|                    | General       | 281                 | 74      | 7     | 7   | 0    | 88    | 31.3%             | 21.1             | 1854           |                                           |
|                    | Total Hunters | 315                 | 74      | 7     | 10  | 3    | 94    | 29.8%             | 22.5             | 2111           |                                           |
|                    | Resident      | 179                 | 22      | 7     | 10  | 0    | 39    | 21.8%             | 33.8             | 1318           |                                           |
|                    | Nonresident   | 136                 | 52      | 0     | 0   | 3    | 55    | 40.4%             | 14.4             | 793            |                                           |
| 102 Jackson        | Cow/Calf      | 318                 | 0       | 0     | 134 | 12   | 146   | 45.9%             | 14.3             | 2094           | 375                                       |
|                    | Limited       | 698                 | 117     | 15    | 153 | 36   | 321   | 46.0%             | 15.2             | 4880           | 747                                       |
|                    | General       | 3357                | 661     | 30    | 506 | 91   | 1288  | 38.4%             | 16.7             | 21471          |                                           |
|                    | Total Hunters | 4317                | 778     | 45    | 793 | 139  | 1755  | 40.7%             | 16.2             | 28445          |                                           |
|                    | Resident      | 3274                | 475     | 45    | 609 | 113  | 1242  | 37.9%             | 17.7             | 22000          |                                           |
|                    | Nonresident   | 1043                | 303     | 0     | 184 | 26   | 513   | 49.2%             | 12.6             | 6445           |                                           |
| 103 Fall Creek     | Cow/Calf      | 454                 | 0       | 0     | 134 | 35   | 169   | 37.2%             | 19.5             | 3294           | 552                                       |
|                    | Limited       | 106                 | 5       | 1     | 23  | 5    | 34    | 32.1%             | 24.1             | 821            | 141                                       |
|                    | General       | 1984                | 356     | 101   | 220 | 54   | 731   | 36.8%             | 17.7             | 12905          |                                           |
|                    | Total Hunters | 2472                | 361     | 102   | 377 | 94   | 934   | 37.8%             | 18.2             | 17020          |                                           |
|                    | Resident      | 1777                | 201     | 74    | 269 | 75   | 619   | 34.8%             | 20.3             | 12564          |                                           |
|                    | Nonresident   | 695                 | 160     | 28    | 108 | 19   | 315   | 45.3%             | 14.1             | 4456           |                                           |
| 104 Hoback         | Cow/Calf      | 21                  | 0       | 0     | 5   | 4    | 9     | 42.9%             | 13.3             | 120            | 56                                        |
|                    | General       | 873                 | 125     | 60    | 68  | 13   | 266   | 30.5%             | 21.0             | 5583           |                                           |
|                    | Total Hunters | 890                 | 125     | 60    | 73  | 17   | 275   | 30.9%             | 20.7             | 5703           |                                           |
|                    | Resident      | 765                 | 79      | 53    | 64  | 13   | 209   | 27.3%             | 23.5             | 4908           |                                           |
|                    | Nonresident   | 125                 | 46      | 7     | 9   | 4    | 66    | 52.8%             | 12.0             | 795            |                                           |
| 105 Afton          | Cow/Calf      | 142                 | 0       | 0     | 35  | 8    | 43    | 30.3%             | 25.3             | 1086           | 201                                       |
|                    | Limited       | 347                 | 39      | 8     | 104 | 14   | 165   | 47.6%             | 17.6             | 2901           | 415                                       |
|                    | General       | 2046                | 322     | 48    | 182 | 34   | 586   | 28.6%             | 21.2             | 12423          |                                           |
|                    | Total Hunters | 2483                | 361     | 56    | 321 | 56   | 794   | 32.0%             | 20.7             | 16410          |                                           |
|                    | Resident      | 1913                | 194     | 41    | 307 | 50   | 592   | 30.9%             | 21.7             | 12850          |                                           |
|                    | Nonresident   | 570                 | 167     | 15    | 14  | 6    | 202   | 35.4%             | 17.6             | 3560           |                                           |
| 106 Piney          | Cow/Calf      | 342                 | 0       | 0     | 104 | 43   | 147   | 43.0%             | 15.7             | 2310           | 479                                       |
|                    | Limited       | 50                  | 6       | 0     | 7   | 0    | 13    | 26.0%             | 30.8             | 400            | 62                                        |
|                    | General       | 2324                | 323     | 111   | 271 | 78   | 783   | 33.7%             | 19.7             | 15452          |                                           |
|                    | Total Hunters | 2630                | 329     | 111   | 382 | 121  | 943   | 35.9%             | 19.3             | 18162          |                                           |
|                    | Resident      | 2256                | 251     | 94    | 309 | 116  | 770   | 34.1%             | 20.9             | 16092          |                                           |
|                    | Nonresident   | 374                 | 78      | 17    | 73  | 5    | 173   | 46.3%             | 12.0             | 2070           |                                           |
| 107 Green River    | Cow/Calf      | 203                 | 0       | 0     | 64  | 5    | 69    | 34.0%             | 23.8             | 1643           | 240                                       |
|                    | Limited       | 790                 | 120     | 27    | 136 | 35   | 318   | 40.3%             | 18.5             | 5897           | 842                                       |
|                    | General       | 217                 | 15      | 4     | 8   | 9    | 36    | 16.6%             | 33.2             | 1195           |                                           |
|                    | Total Hunters | 1153                | 135     | 31    | 208 | 49   | 423   | 36.7%             | 20.7             | 8735           |                                           |
|                    | Resident      | 890                 | 96      | 29    | 153 | 43   | 321   | 36.1%             | 21.9             | 7033           |                                           |
|                    | Nonresident   | 263                 | 39      | 2     | 55  | 6    | 102   | 38.8%             | 16.7             | 1702           |                                           |
| 108 Pinedale       | Cow/Calf      | 164                 | 0       | 0     | 35  | 8    | 43    | 26.2%             | 26.0             | 1116           | 226                                       |
|                    | Limited       | 673                 | 157     | 22    | 59  | 15   | 253   | 37.6%             | 18.0             | 4563           | 756                                       |
|                    | General       | 556                 | 76      | 8     | 27  | 4    | 115   | 20.7%             | 24.6             | 2832           |                                           |
|                    | Total Hunters | 1343                | 233     | 30    | 121 | 27   | 411   | 30.6%             | 20.7             | 8511           |                                           |
|                    | Resident      | 978                 | 134     | 14    | 102 | 21   | 271   | 27.7%             | 23.7             | 6432           |                                           |
|                    | Nonresident   | 365                 | 99      | 16    | 19  | 6    | 140   | 38.4%             | 14.9             | 2079           |                                           |
| 211 Medicine Lodge | Limited       | 1536                | 293     | 41    | 285 | 37   | 656   | 42.7%             | 17.9             | 11760          | 1615                                      |
|                    | Total Hunters | 1536                | 293     | 41    | 285 | 37   | 656   | 42.7%             | 17.9             | 11760          |                                           |
|                    | Resident      | 1293                | 217     | 35    | 224 | 36   | 512   | 39.6%             | 19.6             | 10018          |                                           |
|                    | Nonresident   | 243                 | 76      | 6     | 61  | 1    | 144   | 59.3%             | 12.1             | 1742           |                                           |
| 214 Gooseberry     | Cow/Calf      | 196                 | 0       | 0     | 83  | 22   | 105   | 53.6%             | 9.3              | 975            | 225                                       |
|                    | Limited       | 783                 | 236     | 21    | 117 | 17   | 391   | 49.9%             | 12.4             | 4852           | 839                                       |
|                    | Total Hunters | 914                 | 236     | 21    | 200 | 39   | 496   | 54.3%             | 11.7             | 5827           |                                           |
|                    | Resident      | 749                 | 167     | 21    | 166 | 31   | 385   | 51.4%             | 12.7             | 4885           |                                           |
|                    | Nonresident   | 165                 | 69      | 0     | 34  | 8    | 111   | 67.3%             | 8.5              | 942            |                                           |



TABLE I-H (Continued)  
ELK HERD UNIT REPORT

| HERD                   | TYPE                           | ACTIVE<br>LICS/HTRS | HARVEST |       |     |      |       | HUNTER<br>SUCCESS | DAYS/<br>HARVEST | HUNTER<br>DAYS | LICENSES                      |
|------------------------|--------------------------------|---------------------|---------|-------|-----|------|-------|-------------------|------------------|----------------|-------------------------------|
|                        |                                |                     | BULL    | SPIKE | COW | CALF | TOTAL |                   |                  |                | SOLD<br>(cross hunt<br>incl.) |
| 216 Cody               | Cow/Calf<br>Limited<br>General | 84                  | 0       | 0     | 43  | 12   | 55    | 65.5%             | 8.1              | 445            | 101                           |
|                        |                                | 1010                | 191     | 13    | 359 | 36   | 599   | 59.3%             | 10.5             | 6317           | 1114                          |
|                        |                                | 1433                | 525     | 44    | 42  | 4    | 615   | 42.9%             | 13.3             | 8208           |                               |
|                        | Total Hunters                  | 2493                | 716     | 57    | 444 | 52   | 1269  | 50.9%             | 11.8             | 14970          |                               |
|                        | Resident                       | 1723                | 373     | 52    | 363 | 47   | 835   | 48.5%             | 13.3             | 11071          |                               |
|                        | Nonresident                    | 770                 | 343     | 5     | 81  | 5    | 434   | 56.4%             | 9.0              | 3899           |                               |
| 217 Clark's Fork       | Cow/Calf<br>Limited<br>General | 303                 | 0       | 0     | 102 | 11   | 113   | 37.3%             | 12.3             | 1390           | 353                           |
|                        |                                | 830                 | 94      | 16    | 367 | 31   | 508   | 61.2%             | 12.8             | 6498           | 952                           |
|                        |                                | 595                 | 164     | 22    | 0   | 0    | 186   | 31.3%             | 22.2             | 4134           |                               |
|                        | Total Hunters                  | 1676                | 258     | 38    | 469 | 42   | 807   | 48.2%             | 14.9             | 12022          |                               |
|                        | Resident                       | 1386                | 173     | 26    | 407 | 40   | 646   | 46.6%             | 16.2             | 10476          |                               |
|                        | Nonresident                    | 290                 | 85      | 12    | 62  | 2    | 161   | 55.5%             | 9.6              | 1546           |                               |
| 320 Fortification      | Cow/Calf<br>Limited            | 38                  | 0       | 0     | 17  | 1    | 18    | 47.4%             | 6.4              | 115            | 40                            |
|                        |                                | 69                  | 13      | 2     | 9   | 0    | 24    | 34.8%             | 13.5             | 324            | 73                            |
|                        | Total Hunters                  | 104                 | 13      | 2     | 26  | 1    | 42    | 40.4%             | 10.5             | 439            |                               |
|                        | Resident                       | 93                  | 10      | 2     | 26  | 0    | 38    | 40.9%             | 10.2             | 388            |                               |
|                        | Nonresident                    | 11                  | 3       | 0     | 0   | 1    | 4     | 36.4%             | 12.8             | 51             |                               |
| 321 North Bighorn      | Cow/Calf<br>Limited<br>General | 349                 | 0       | 0     | 87  | 11   | 98    | 28.1%             | 22.1             | 2162           | 459                           |
|                        |                                | 2187                | 317     | 70    | 185 | 54   | 626   | 28.6%             | 25.2             | 15757          | 2332                          |
|                        |                                | 1398                | 152     | 44    | 43  | 4    | 243   | 17.4%             | 38.8             | 9420           |                               |
|                        | Total Hunters                  | 3883                | 469     | 114   | 315 | 69   | 967   | 24.9%             | 28.3             | 27339          |                               |
|                        | Resident                       | 3308                | 380     | 104   | 260 | 57   | 801   | 24.2%             | 29.6             | 23677          |                               |
|                        | Nonresident                    | 575                 | 89      | 10    | 55  | 12   | 166   | 28.9%             | 22.1             | 3662           |                               |
| 322 South Bighorn      | Cow/Calf<br>Limited            | 915                 | 0       | 0     | 303 | 58   | 361   | 39.5%             | 13.8             | 4983           | 1073                          |
|                        |                                | 1905                | 490     | 47    | 281 | 45   | 863   | 45.3%             | 14.5             | 12553          | 2094                          |
|                        | Total Hunters                  | 2736                | 490     | 47    | 584 | 103  | 1224  | 44.7%             | 14.3             | 17536          |                               |
|                        | Resident                       | 2135                | 337     | 28    | 452 | 97   | 914   | 42.8%             | 16.0             | 14594          |                               |
|                        | Nonresident                    | 601                 | 153     | 19    | 132 | 6    | 310   | 51.6%             | 9.5              | 2942           |                               |
| 344 Rochelle Hills     | Limited                        | 246                 | 53      | 2     | 111 | 18   | 184   | 74.8%             | 5.2              | 949            | 270                           |
|                        |                                | 246                 | 53      | 2     | 111 | 18   | 184   | 74.8%             | 5.2              | 949            |                               |
|                        |                                | 214                 | 42      | 2     | 104 | 16   | 164   | 76.6%             | 4.5              | 740            |                               |
|                        |                                | 32                  | 11      | 0     | 7   | 2    | 20    | 62.5%             | 10.5             | 209            |                               |
| 423 Uinta              | Cow/Calf<br>Limited<br>General | 24                  | 0       | 0     | 8   | 0    | 8     | 33.3%             | 25.8             | 206            | 25                            |
|                        |                                | 199                 | 17      | 5     | 49  | 2    | 73    | 36.7%             | 17.9             | 1308           | 284                           |
|                        |                                | 1129                | 180     | 50    | 116 | 11   | 357   | 31.6%             | 16.6             | 5934           |                               |
|                        | Total Hunters                  | 1347                | 197     | 55    | 173 | 13   | 438   | 32.5%             | 17.0             | 7448           |                               |
|                        | Resident                       | 1270                | 170     | 55    | 151 | 11   | 387   | 30.5%             | 18.4             | 7115           |                               |
|                        | Nonresident                    | 77                  | 27      | 0     | 22  | 2    | 51    | 66.2%             | 6.5              | 333            |                               |
| 424 South Rock Springs | Limited                        | 606                 | 168     | 6     | 212 | 34   | 420   | 69.3%             | 9.4              | 3936           | 623                           |
|                        |                                | 606                 | 168     | 6     | 212 | 34   | 420   | 69.3%             | 9.4              | 3936           |                               |
|                        |                                | 512                 | 131     | 3     | 188 | 34   | 356   | 69.5%             | 9.3              | 3319           |                               |
|                        |                                | 94                  | 37      | 3     | 24  | 0    | 64    | 68.1%             | 9.6              | 617            |                               |
| 425 Sierra Madre       | Cow/Calf<br>Limited<br>General | 31                  | 0       | 0     | 10  | 6    | 16    | 51.6%             | 10.0             | 160            | 100                           |
|                        |                                | 831                 | 34      | 0     | 289 | 63   | 386   | 46.5%             | 12.9             | 4995           | 925                           |
|                        |                                | 4213                | 630     | 392   | 293 | 51   | 1366  | 32.4%             | 20.6             | 28076          |                               |
|                        | Total Hunters                  | 5059                | 664     | 392   | 592 | 120  | 1768  | 34.9%             | 18.8             | 33231          |                               |
|                        | Resident                       | 4270                | 480     | 331   | 460 | 68   | 1339  | 31.4%             | 21.3             | 28528          |                               |
|                        | Nonresident                    | 789                 | 184     | 61    | 132 | 52   | 429   | 54.4%             | 11.0             | 4703           |                               |
| 426 Steamboat          | Limited                        | 427                 | 192     | 0     | 126 | 27   | 345   | 80.8%             | 6.2              | 2155           | 435                           |
|                        |                                | 427                 | 192     | 0     | 126 | 27   | 345   | 80.8%             | 6.2              | 2155           |                               |
|                        |                                | 369                 | 157     | 0     | 114 | 23   | 294   | 79.7%             | 6.7              | 1969           |                               |
|                        |                                | 58                  | 35      | 0     | 12  | 4    | 51    | 87.9%             | 3.6              | 186            |                               |
| 428 West Green River   | Cow/Calf<br>General            | 154                 | 0       | 0     | 51  | 30   | 81    | 52.6%             | 9.7              | 783            | 204                           |
|                        |                                | 3101                | 451     | 167   | 440 | 114  | 1172  | 37.8%             | 15.1             | 17663          |                               |
|                        |                                | 3213                | 451     | 167   | 491 | 144  | 1253  | 39.0%             | 14.7             | 18446          |                               |
|                        |                                | 2931                | 386     | 151   | 444 | 130  | 1111  | 37.9%             | 15.1             | 16829          |                               |
|                        |                                | 282                 | 65      | 16    | 47  | 14   | 142   | 50.4%             | 11.4             | 1617           |                               |
|                        |                                |                     |         |       |     |      |       |                   |                  |                |                               |

TABLE I-H (Continued)  
ELK HERD UNIT REPORT

| HERD                 | TYPE          | ACTIVE<br>LICS/HTRS | HARVEST |       |     |      |       | HUNTER<br>SUCCESS | DAYS/<br>HARVEST | HUNTER<br>DAYS | LICENSES<br>SOLD<br>(cross hunt<br>incl.) |
|----------------------|---------------|---------------------|---------|-------|-----|------|-------|-------------------|------------------|----------------|-------------------------------------------|
|                      |               |                     | BULL    | SPIKE | COW | CALF | TOTAL |                   |                  |                |                                           |
| 430 Petition         | Limited       | 76                  | 10      | 0     | 28  | 4    | 42    | 55.3%             | 11.5             | 482            | 80                                        |
|                      | Total Hunters | 76                  | 10      | 0     | 28  | 4    | 42    | 55.3%             | 11.5             | 482            |                                           |
|                      | Resident      | 60                  | 6       | 0     | 19  | 4    | 29    | 48.3%             | 13.9             | 404            |                                           |
|                      | Nonresident   | 16                  | 4       | 0     | 9   | 0    | 13    | 81.3%             | 6.0              | 78             |                                           |
| 531 Iron Mountain    | Cow/Calf      | 253                 | 0       | 0     | 117 | 10   | 127   | 50.2%             | 13.8             | 1751           | 326                                       |
|                      | Limited       | 461                 | 149     | 14    | 80  | 3    | 246   | 53.4%             | 13.2             | 3248           | 518                                       |
|                      | Total Hunters | 692                 | 149     | 14    | 197 | 13   | 373   | 53.9%             | 13.4             | 4999           |                                           |
|                      | Resident      | 560                 | 92      | 14    | 157 | 13   | 276   | 49.3%             | 15.6             | 4300           |                                           |
|                      | Nonresident   | 132                 | 57      | 0     | 40  | 0    | 97    | 73.5%             | 7.2              | 699            |                                           |
| 533 Snowy Range      | Cow/Calf      | 258                 | 0       | 0     | 92  | 19   | 111   | 43.0%             | 13.4             | 1482           | 352                                       |
|                      | Limited       | 1004                | 143     | 24    | 167 | 49   | 383   | 38.1%             | 16.8             | 6421           | 1118                                      |
|                      | General       | 4017                | 540     | 133   | 324 | 66   | 1063  | 26.5%             | 26.0             | 27618          |                                           |
|                      | Total Hunters | 5174                | 683     | 157   | 583 | 134  | 1557  | 30.1%             | 22.8             | 35521          |                                           |
|                      | Resident      | 4564                | 519     | 151   | 500 | 124  | 1294  | 28.4%             | 24.8             | 32102          |                                           |
|                      | Nonresident   | 610                 | 164     | 6     | 83  | 10   | 263   | 43.1%             | 13.0             | 3419           |                                           |
| 534 Shirley Mountain | Cow/Calf      | 155                 | 0       | 0     | 47  | 15   | 62    | 40.0%             | 12.1             | 751            | 188                                       |
|                      | Limited       | 387                 | 95      | 10    | 113 | 32   | 250   | 64.6%             | 9.1              | 2271           | 431                                       |
|                      | Total Hunters | 529                 | 95      | 10    | 160 | 47   | 312   | 59.0%             | 9.7              | 3022           |                                           |
|                      | Resident      | 453                 | 65      | 10    | 135 | 43   | 253   | 55.8%             | 10.5             | 2667           |                                           |
|                      | Nonresident   | 76                  | 30      | 0     | 25  | 4    | 59    | 77.6%             | 6.0              | 355            |                                           |
| 635 Wiggins Fork     | Cow/Calf      | 36                  | 0       | 0     | 11  | 2    | 13    | 36.1%             | 13.6             | 177            | 50                                        |
|                      | Limited       | 345                 | 14      | 0     | 117 | 10   | 141   | 40.9%             | 17.9             | 2524           | 384                                       |
|                      | General       | 1667                | 380     | 116   | 32  | 8    | 536   | 32.2%             | 20.9             | 11208          |                                           |
|                      | Total Hunters | 2034                | 394     | 116   | 160 | 20   | 690   | 33.9%             | 20.2             | 13909          |                                           |
|                      | Resident      | 1660                | 302     | 106   | 134 | 19   | 561   | 33.8%             | 20.3             | 11411          |                                           |
|                      | Nonresident   | 374                 | 92      | 10    | 26  | 1    | 129   | 34.5%             | 19.4             | 2498           |                                           |
| 637 South Wind River | Cow/Calf      | 278                 | 0       | 0     | 83  | 23   | 106   | 38.1%             | 13.8             | 1463           | 304                                       |
|                      | Limited       | 782                 | 100     | 20    | 111 | 10   | 241   | 30.8%             | 24.4             | 5876           | 863                                       |
|                      | General       | 1047                | 175     | 104   | 0   | 0    | 279   | 26.6%             | 26.2             | 7304           |                                           |
|                      | Total Hunters | 2054                | 275     | 124   | 194 | 33   | 626   | 30.5%             | 23.4             | 14643          |                                           |
|                      | Resident      | 1844                | 229     | 111   | 155 | 21   | 516   | 28.0%             | 25.8             | 13287          |                                           |
|                      | Nonresident   | 210                 | 46      | 13    | 39  | 12   | 110   | 52.4%             | 12.3             | 1356           |                                           |
| 638 Green Mountain   | Cow/Calf      | 11                  | 0       | 0     | 2   | 0    | 2     | 18.2%             | 17.5             | 35             | 20                                        |
|                      | Limited       | 315                 | 64      | 7     | 91  | 11   | 173   | 54.9%             | 9.5              | 1639           | 334                                       |
|                      | General       | 221                 | 11      | 0     | 8   | 4    | 23    | 10.4%             | 41.4             | 953            |                                           |
|                      | Total Hunters | 545                 | 75      | 7     | 101 | 15   | 198   | 36.3%             | 13.3             | 2627           |                                           |
|                      | Resident      | 503                 | 59      | 7     | 91  | 14   | 171   | 34.0%             | 14.2             | 2421           |                                           |
|                      | Nonresident   | 42                  | 16      | 0     | 10  | 1    | 27    | 64.3%             | 7.6              | 206            |                                           |
| 639 Ferris           | Limited       | 285                 | 64      | 4     | 42  | 10   | 120   | 42.1%             | 14.2             | 1700           | 326                                       |
|                      | Total Hunters | 285                 | 64      | 4     | 42  | 10   | 120   | 42.1%             | 14.2             | 1700           |                                           |
|                      | Resident      | 236                 | 50      | 4     | 29  | 10   | 93    | 39.4%             | 16.0             | 1491           |                                           |
|                      | Nonresident   | 49                  | 14      | 0     | 13  | 0    | 27    | 55.1%             | 7.7              | 209            |                                           |
| 643 Shamrock         | Cow/Calf      | 26                  | 0       | 0     | 12  | 2    | 14    | 53.8%             | 12.9             | 181            | 36                                        |
|                      | Limited       | 72                  | 27      | 0     | 9   | 2    | 38    | 52.8%             | 9.5              | 362            | 76                                        |
|                      | Total Hunters | 90                  | 27      | 0     | 21  | 4    | 52    | 57.8%             | 10.4             | 543            |                                           |
|                      | Resident      | 72                  | 16      | 0     | 17  | 2    | 35    | 48.6%             | 11.9             | 415            |                                           |
|                      | Nonresident   | 18                  | 11      | 0     | 4   | 2    | 17    | 94.4%             | 7.5              | 128            |                                           |
| 730 Rawhide          | Cow/Calf      | 41                  | 0       | 0     | 15  | 7    | 22    | 53.7%             | 24.3             | 535            | 50                                        |
|                      | Limited       | 86                  | 27      | 3     | 9   | 4    | 43    | 50.0%             | 23.7             | 1020           | 101                                       |
|                      | Total Hunters | 114                 | 27      | 3     | 24  | 11   | 65    | 57.0%             | 23.9             | 1555           |                                           |
|                      | Resident      | 103                 | 21      | 3     | 23  | 11   | 58    | 56.3%             | 25.9             | 1505           |                                           |
|                      | Nonresident   | 11                  | 6       | 0     | 1   | 0    | 7     | 63.6%             | 7.1              | 50             |                                           |
| 740 Black Hills      | Cow/Calf      | 141                 | 0       | 0     | 50  | 4    | 54    | 38.3%             | 30.3             | 1635           | 162                                       |
|                      | Limited       | 923                 | 258     | 30    | 175 | 19   | 482   | 52.2%             | 20.6             | 9908           | 992                                       |
|                      | Total Hunters | 1028                | 258     | 30    | 225 | 23   | 536   | 52.1%             | 21.5             | 11543          |                                           |
|                      | Resident      | 857                 | 201     | 26    | 186 | 15   | 428   | 49.9%             | 24.0             | 10253          |                                           |
|                      | Nonresident   | 171                 | 57      | 4     | 39  | 8    | 108   | 63.2%             | 11.9             | 1290           |                                           |

TABLE I-H (Continued)

## ELK HERD UNIT REPORT

| HERD                                | TYPE                | ACTIVE<br>LICS/HTRS | HARVEST |       |     |      |       | HUNTER<br>SUCCESS | DAYS/<br>HARVEST | HUNTER<br>DAYS | LICENSES<br>SOLD<br>(cross hunt<br>incl.) |
|-------------------------------------|---------------------|---------------------|---------|-------|-----|------|-------|-------------------|------------------|----------------|-------------------------------------------|
|                                     |                     |                     | BULL    | SPIKE | COW | CALF | TOTAL |                   |                  |                |                                           |
| 741 Laramie Peak-<br>Muddy Mountain | Cow/Calf<br>Limited | 599                 | 0       | 0     | 170 | 71   | 241   | 40.2%             | 17.6             | 4239           | 752                                       |
|                                     |                     | 3179                | 757     | 86    | 755 | 238  | 1836  | 57.8%             | 13.0             | 23944          | 3580                                      |
|                                     | Total Hunters       | 3648                | 757     | 86    | 925 | 309  | 2077  | 56.9%             | 13.6             | 28183          |                                           |
|                                     | Resident            | 3146                | 629     | 86    | 800 | 273  | 1788  | 56.8%             | 14.2             | 25356          |                                           |
|                                     | Nonresident         | 502                 | 128     | 0     | 125 | 36   | 289   | 57.6%             | 9.8              | 2827           |                                           |
| 742 Rattlesnake                     | Cow/Calf<br>Limited | 137                 | 0       | 0     | 30  | 9    | 39    | 28.5%             | 24.8             | 968            | 150                                       |
|                                     |                     | 185                 | 62      | 0     | 41  | 3    | 106   | 57.3%             | 12.3             | 1301           | 205                                       |
|                                     | Total Hunters       | 296                 | 62      | 0     | 71  | 12   | 145   | 49.0%             | 15.6             | 2269           |                                           |
|                                     | Resident            | 255                 | 53      | 0     | 62  | 10   | 125   | 49.0%             | 16.8             | 2103           |                                           |
|                                     | Nonresident         | 41                  | 9       | 0     | 9   | 2    | 20    | 48.8%             | 8.3              | 166            |                                           |
| 743 Pine Ridge                      | Cow/Calf<br>Limited | 33                  | 0       | 0     | 13  | 2    | 15    | 45.5%             | 8.7              | 131            | 33                                        |
|                                     |                     | 48                  | 22      | 0     | 10  | 3    | 35    | 72.9%             | 10.0             | 350            | 56                                        |
|                                     | Total Hunters       | 77                  | 22      | 0     | 23  | 5    | 50    | 64.9%             | 9.6              | 481            |                                           |
|                                     | Resident            | 71                  | 19      | 0     | 23  | 3    | 45    | 63.4%             | 9.9              | 447            |                                           |
|                                     | Nonresident         | 6                   | 3       | 0     | 0   | 2    | 5     | 83.3%             | 6.8              | 34             |                                           |
| 999 Rest of State (hunt area 129)   | Cow/Calf<br>General | 60                  | 0       | 0     | 12  | 10   | 22    | 36.7%             | 24.0             | 529            | 67                                        |
|                                     |                     | 635                 | 103     | 8     | 44  | 5    | 160   | 25.2%             | 30.1             | 4812           |                                           |
|                                     | Total Hunters       | 672                 | 103     | 8     | 56  | 15   | 182   | 27.1%             | 29.3             | 5341           |                                           |
|                                     | Resident            | 636                 | 90      | 8     | 51  | 15   | 164   | 25.8%             | 31.5             | 5158           |                                           |
|                                     | Nonresident         | 36                  | 13      | 0     | 5   | 0    | 18    | 50.0%             | 10.2             | 183            |                                           |

TABLE III  
CONFIDENCE INTERVALS FOR TOTAL ELK HARVEST  
BY HERD UNIT  
2007

| HERD |                             | TOTAL HARVEST | 90% CONFIDENCE LIMITS |   |      |
|------|-----------------------------|---------------|-----------------------|---|------|
| 101  | Targhee                     | 94            | 81                    | - | 107  |
| 102  | Jackson                     | 1755          | 1699                  | - | 1811 |
| 103  | Fall Creek                  | 934           | 893                   | - | 975  |
| 104  | Hoback                      | 275           | 252                   | - | 298  |
| 105  | Afton                       | 794           | 754                   | - | 834  |
| 106  | Piney                       | 943           | 902                   | - | 984  |
| 107  | Green River                 | 423           | 396                   | - | 450  |
| 108  | Pinedale                    | 411           | 383                   | - | 439  |
| 211  | Medicine Lodge              | 656           | 623                   | - | 689  |
| 214  | Gooseberry                  | 496           | 470                   | - | 522  |
| 216  | Cody                        | 1269          | 1226                  | - | 1312 |
| 217  | Clark's Fork                | 807           | 770                   | - | 844  |
| 320  | Fortification               | 42            | 34                    | - | 50   |
| 321  | North Bighorn               | 967           | 922                   | - | 1012 |
| 322  | South Bighorn               | 1224          | 1181                  | - | 1267 |
| 344  | Rochelle Hills              | 184           | 173                   | - | 195  |
| 423  | Uinta                       | 438           | 409                   | - | 467  |
| 424  | South Rock Springs          | 420           | 401                   | - | 439  |
| 425  | Sierra Madre                | 1768          | 1711                  | - | 1825 |
| 426  | Steamboat                   | 345           | 332                   | - | 358  |
| 428  | West Green River            | 1253          | 1206                  | - | 1300 |
| 430  | Petition                    | 42            | 35                    | - | 49   |
| 531  | Iron Mountain               | 373           | 351                   | - | 395  |
| 533  | Snowy Range                 | 1557          | 1501                  | - | 1613 |
| 534  | Shirley Mountain            | 312           | 293                   | - | 331  |
| 635  | Wiggins Fork                | 690           | 654                   | - | 726  |
| 637  | South Wind River            | 626           | 591                   | - | 661  |
| 638  | Green Mountain              | 198           | 179                   | - | 217  |
| 639  | Ferris                      | 120           | 106                   | - | 134  |
| 643  | Shamrock                    | 52            | 44                    | - | 60   |
| 730  | Rawhide                     | 65            | 56                    | - | 74   |
| 740  | Black Hills                 | 536           | 509                   | - | 563  |
| 741  | Laramie Peak-Muddy Mountain | 2077          | 2027                  | - | 2127 |
| 742  | Rattlesnake                 | 145           | 130                   | - | 160  |
| 743  | Pine Ridge                  | 50            | 43                    | - | 57   |
| 999  | Rest of State               | 182           | 163                   | - | 201  |

TABLE IV  
ELK HUNTERS HUNTING ON OPENING DAY  
BY HUNT AREA AND RESIDENCY  
2007

| HUNT<br>AREA | RESIDENT HUNTERS<br>HUNTING ON<br>OPENING DAY | PERCENT<br>WHO HUNTED ON<br>OPENING DAY | NONRESIDENT HUNTERS<br>HUNTING ON<br>OPENING DAY | PERCENT<br>WHO HUNTED ON<br>OPENING DAY |
|--------------|-----------------------------------------------|-----------------------------------------|--------------------------------------------------|-----------------------------------------|
| 1            | 98                                            | 48.0%                                   | 27                                               | 56.6%                                   |
| 2            | 64                                            | 68.6%                                   | 5                                                | 40.4%                                   |
| 3            | 47                                            | 45.7%                                   | 5                                                | 49.4%                                   |
| 5            | 112                                           | 36.3%                                   | 18                                               | 21.3%                                   |
| 6            | 151                                           | 60.0%                                   | 25                                               | 52.1%                                   |
| 7            | 982                                           | 37.2%                                   | 176                                              | 39.5%                                   |
| 8            | 35                                            | 37.5%                                   | 7                                                | 50.0%                                   |
| 9            | 283                                           | 35.6%                                   | 23                                               | 43.8%                                   |
| 10           | 323                                           | 34.9%                                   | 60                                               | 39.1%                                   |
| 11           | 210                                           | 57.7%                                   | 46                                               | 81.5%                                   |
| 12           | 462                                           | 41.3%                                   | 61                                               | 46.8%                                   |
| 13           | 460                                           | 46.9%                                   | 123                                              | 46.2%                                   |
| 15           | 351                                           | 43.3%                                   | 100                                              | 61.5%                                   |
| 16           | 261                                           | 57.9%                                   | 52                                               | 68.2%                                   |
| 19           | 278                                           | 60.5%                                   | 34                                               | 62.3%                                   |
| 21           | 1302                                          | 48.7%                                   | 155                                              | 43.9%                                   |
| 22           | 48                                            | 48.5%                                   | 11                                               | 59.5%                                   |
| 23           | 137                                           | 53.9%                                   | 25                                               | 61.3%                                   |
| 24           | 175                                           | 62.8%                                   | 31                                               | 83.8%                                   |
| 25           | 116                                           | 43.8%                                   | 18                                               | 40.5%                                   |
| 27           | 24                                            | 35.3%                                   | 8                                                | 38.2%                                   |
| 28           | 469                                           | 37.5%                                   | 65                                               | 68.7%                                   |
| 30           | 69                                            | 44.1%                                   | 14                                               | 57.5%                                   |
| 31           | 120                                           | 49.8%                                   | 16                                               | 43.3%                                   |
| 32           | 73                                            | 63.6%                                   | 15                                               | 49.0%                                   |
| 33           | 44                                            | 38.8%                                   | 23                                               | 81.8%                                   |
| 34           | 301                                           | 39.6%                                   | 76                                               | 36.6%                                   |
| 35           | 125                                           | 50.5%                                   | 23                                               | 49.8%                                   |
| 36           | 237                                           | 34.4%                                   | 45                                               | 47.2%                                   |
| 37           | 392                                           | 33.1%                                   | 57                                               | 33.7%                                   |
| 38           | 460                                           | 53.0%                                   | 94                                               | 51.3%                                   |
| 39           | 113                                           | 57.3%                                   | 21                                               | 55.6%                                   |
| 40           | 159                                           | 65.6%                                   | 31                                               | 58.2%                                   |
| 41           | 215                                           | 42.1%                                   | 43                                               | 44.8%                                   |
| 42           | 101                                           | 45.8%                                   | 23                                               | 50.6%                                   |
| 45           | 265                                           | 43.8%                                   | 60                                               | 58.2%                                   |
| 46           | 67                                            | 45.7%                                   | 12                                               | 67.1%                                   |
| 47           | 61                                            | 57.1%                                   | 28                                               | 80.7%                                   |
| 48           | 194                                           | 40.0%                                   | 57                                               | 31.9%                                   |
| 49           | 163                                           | 37.4%                                   | 38                                               | 34.5%                                   |
| 50           | 108                                           | 52.6%                                   | 5                                                | 18.6%                                   |
| 51           | 134                                           | 48.2%                                   | 44                                               | 33.6%                                   |
| 52           | 130                                           | 45.8%                                   | 8                                                | 23.4%                                   |
| 53           | 52                                            | 26.0%                                   | 6                                                | 41.1%                                   |
| 54           | 52                                            | 26.5%                                   | 5                                                | 20.8%                                   |
| 55           | 107                                           | 32.0%                                   | 14                                               | 11.7%                                   |
| 56           | 128                                           | 25.9%                                   | 36                                               | 26.7%                                   |
| 58           | 42                                            | 25.6%                                   | 12                                               | 32.5%                                   |
| 59           | 169                                           | 37.1%                                   | 45                                               | 29.8%                                   |
| 60           | 56                                            | 40.8%                                   | 81                                               | 30.9%                                   |
| 61           | 102                                           | 45.9%                                   | 37                                               | 49.0%                                   |
| 62           | 118                                           | 42.6%                                   | 39                                               | 63.0%                                   |
| 63           | 136                                           | 46.2%                                   | 31                                               | 57.1%                                   |
| 64           | 99                                            | 45.7%                                   | 26                                               | 48.9%                                   |
| 65           | 127                                           | 39.6%                                   | 7                                                | 24.8%                                   |
| 66           | 43                                            | 40.2%                                   | 0                                                | 0.0%                                    |
| 67           | 391                                           | 35.6%                                   | 55                                               | 25.2%                                   |
| 68           | 187                                           | 34.9%                                   | 13                                               | 12.2%                                   |
| 69           | 43                                            | 17.7%                                   | 33                                               | 44.2%                                   |
| 70           | 121                                           | 29.6%                                   | 59                                               | 40.9%                                   |
| 71           | 57                                            | 32.7%                                   | 46                                               | 28.0%                                   |
| 73           | 74                                            | 41.3%                                   | 61                                               | 45.2%                                   |
| 74           | 39                                            | 30.5%                                   | 10                                               | 60.0%                                   |
| 75           | 80                                            | 27.4%                                   | 36                                               | 19.6%                                   |
| 77           | 55                                            | 15.6%                                   | 14                                               | 21.3%                                   |

TABLE IV (Continued)

## ELK OPENING DAY HUNTERS REPORT

| HUNT AREA | RESIDENT HUNTERS | PERCENT WHO HUNTED ON OPENING DAY | NONRESIDENT HUNTERS | PERCENT WHO HUNTED ON OPENING DAY |
|-----------|------------------|-----------------------------------|---------------------|-----------------------------------|
| 78        | 10               | 15.9%                             | 0                   | 0.0%                              |
| 79        | 106              | 45.4%                             | 31                  | 22.3%                             |
| 80        | 41               | 8.6%                              | 5                   | 18.2%                             |
| 81        | 246              | 33.2%                             | 121                 | 51.0%                             |
| 82        | 102              | 25.8%                             | 44                  | 41.2%                             |
| 83        | 198              | 36.7%                             | 34                  | 43.1%                             |
| 84        | 302              | 29.6%                             | 138                 | 37.0%                             |
| 85        | 282              | 31.8%                             | 140                 | 40.9%                             |
| 86        | 101              | 40.3%                             | 36                  | 47.8%                             |
| 87        | 319              | 57.9%                             | 23                  | 40.9%                             |
| 88        | 25               | 59.3%                             | 5                   | 60.0%                             |
| 89        | 466              | 62.2%                             | 102                 | 44.3%                             |
| 90        | 252              | 36.8%                             | 97                  | 54.1%                             |
| 91        | 306              | 39.8%                             | 103                 | 48.1%                             |
| 92        | 415              | 42.9%                             | 93                  | 51.8%                             |
| 93        | 78               | 41.7%                             | 43                  | 51.2%                             |
| 94        | 677              | 47.4%                             | 118                 | 59.7%                             |
| 95        | 201              | 57.7%                             | 54                  | 62.1%                             |
| 96        | 124              | 34.3%                             | 35                  | 35.9%                             |
| 97        | 108              | 33.3%                             | 83                  | 37.4%                             |
| 98        | 253              | 37.8%                             | 58                  | 41.1%                             |
| 99        | 161              | 50.7%                             | 39                  | 70.7%                             |
| 100       | 253              | 68.4%                             | 43                  | 74.4%                             |
| 102       | 728              | 50.3%                             | 43                  | 41.9%                             |
| 103       | 141              | 41.6%                             | 46                  | 71.1%                             |
| 104       | 492              | 44.8%                             | 59                  | 45.6%                             |
| 105       | 209              | 49.8%                             | 0                   | 0.0%                              |
| 106       | 311              | 39.7%                             | 39                  | 59.5%                             |
| 107       | 281              | 48.2%                             | 3                   | 27.4%                             |
| 108       | 48               | 49.3%                             | 22                  | 43.0%                             |
| 110       | 727              | 42.1%                             | 64                  | 58.8%                             |
| 111       | 64               | 46.5%                             | 25                  | 80.9%                             |
| 113       | 41               | 48.6%                             | 6                   | 33.6%                             |
| 114       | 40               | 49.5%                             | 7                   | 25.9%                             |
| 116       | 142              | 48.2%                             | 22                  | 37.7%                             |
| 117       | 175              | 49.0%                             | 35                  | 53.5%                             |
| 118       | 45               | 61.7%                             | 15                  | 80.0%                             |
| 120       | 132              | 56.5%                             | 31                  | 75.6%                             |
| 121       | 45               | 19.0%                             | 12                  | 21.3%                             |
| 122       | 17               | 23.9%                             | 0                   | 0.0%                              |
| 123       | 42               | 51.7%                             | 2                   | 100.0%                            |
| 124       | 21               | 35.0%                             | 12                  | 76.0%                             |
| 125       | 6                | 7.2%                              | 8                   | 9.8%                              |
| 126       | 27               | 55.1%                             | 5                   | 40.9%                             |
| 127       | 26               | 57.9%                             | 7                   | 66.7%                             |
| 128       | 108              | 47.7%                             | 0                   | 0.0%                              |
| 129       | 185              | 29.2%                             | 12                  | 34.0%                             |
| 130       | 12               | 65.6%                             | 0                   | 0.0%                              |

TABLE V  
ELK LICENSE DATA SUMMARY  
2007

| HUNT<br>AREA    | LICENSE<br>TYPE | NUMBER<br>SOLD | NUMBER<br>SURVEYED | NUMBER<br>USABLE SURVEYS<br>(both hunters and nonhunters) | % USABLE<br>RESPONSE |
|-----------------|-----------------|----------------|--------------------|-----------------------------------------------------------|----------------------|
| GENERAL         | RES             | 24940          | 17386              | 6660                                                      | 38.3%                |
| GENERAL         | NONRES          | 4058           | 1887               | 1238                                                      | 65.6%                |
| 1               | 1               | 152            | 89                 | 54                                                        | 60.7%                |
| 1               | 2               | 105            | 77                 | 51                                                        | 66.2%                |
| 2               | 1               | 38             | 38                 | 20                                                        | 52.6%                |
| 2               | 2               | 35             | 35                 | 16                                                        | 45.7%                |
| 2               | 6               | 40             | 40                 | 17                                                        | 42.5%                |
| 3               | 1               | 51             | 51                 | 24                                                        | 47.1%                |
| 3               | 2               | 50             | 50                 | 23                                                        | 46.0%                |
| 3               | 6               | 50             | 50                 | 30                                                        | 60.0%                |
| 5               | 1               | 255            | 100                | 52                                                        | 52.0%                |
| 5               | 6               | 226            | 100                | 57                                                        | 57.0%                |
| 6               | 1               | 163            | 91                 | 49                                                        | 53.9%                |
| 6               | 2               | 100            | 75                 | 31                                                        | 41.3%                |
| 6               | 6               | 100            | 75                 | 31                                                        | 41.3%                |
| 7               | 1               | 1509           | 140                | 76                                                        | 54.3%                |
| 7               | 2               | 1002           | 136                | 58                                                        | 42.7%                |
| 7               | 3               | 473            | 129                | 46                                                        | 35.7%                |
| 7               | 5               | 100            | 75                 | 18                                                        | 24.0%                |
| 7               | 6               | 500            | 129                | 80                                                        | 62.0%                |
| 7               | 7               | 102            | 86                 | 51                                                        | 59.3%                |
| 8               | 1               | 126            | 83                 | 33                                                        | 39.8%                |
| 10              | 2               | 105            | 77                 | 41                                                        | 53.3%                |
| 10              | 6               | 151            | 89                 | 53                                                        | 59.6%                |
| 11              | 1               | 153            | 89                 | 57                                                        | 64.0%                |
| 11              | 2               | 301            | 104                | 54                                                        | 51.9%                |
| 12              | 2               | 114            | 89                 | 61                                                        | 68.5%                |
| 12, 13, 15, 110 | 6               | 75             | 75                 | 43                                                        | 57.3%                |
| 13              | 2               | 140            | 89                 | 57                                                        | 64.0%                |
| 15              | 2               | 85             | 82                 | 48                                                        | 58.5%                |
| 16              | 1               | 204            | 96                 | 61                                                        | 63.5%                |
| 16              | 2               | 227            | 98                 | 44                                                        | 44.9%                |
| 16              | 6               | 153            | 89                 | 53                                                        | 59.6%                |
| 16              | 7               | 35             | 35                 | 23                                                        | 65.7%                |
| 19              | 1               | 154            | 89                 | 45                                                        | 50.6%                |
| 19              | 2               | 155            | 89                 | 46                                                        | 51.7%                |
| 19              | 3               | 121            | 83                 | 39                                                        | 47.0%                |
| 19              | 4               | 66             | 66                 | 33                                                        | 50.0%                |
| 19              | 6               | 150            | 89                 | 46                                                        | 51.7%                |
| 21              | 2               | 542            | 115                | 58                                                        | 50.4%                |
| 21              | 6               | 25             | 25                 | 12                                                        | 48.0%                |
| 22              | 1               | 52             | 52                 | 30                                                        | 57.7%                |
| 22              | 2               | 79             | 68                 | 40                                                        | 58.8%                |
| 23              | 1               | 105            | 77                 | 28                                                        | 36.4%                |
| 23              | 2               | 100            | 75                 | 38                                                        | 50.7%                |
| 23              | 6               | 150            | 89                 | 44                                                        | 49.4%                |
| 24              | 1               | 131            | 85                 | 56                                                        | 65.9%                |
| 24              | 2               | 75             | 68                 | 46                                                        | 67.7%                |
| 24              | 3               | 128            | 83                 | 49                                                        | 59.0%                |
| 25, 27          | 1               | 155            | 133                | 76                                                        | 57.1%                |
| 25, 27          | 2               | 100            | 100                | 61                                                        | 61.0%                |
| 25              | 6               | 152            | 89                 | 43                                                        | 48.3%                |
| 28              | 2               | 201            | 96                 | 59                                                        | 61.5%                |
| 28              | 6               | 152            | 89                 | 46                                                        | 51.7%                |
| 30              | 1               | 54             | 54                 | 27                                                        | 50.0%                |
| 30              | 2               | 130            | 83                 | 53                                                        | 63.9%                |
| 31              | 1               | 106            | 77                 | 48                                                        | 62.3%                |
| 31              | 2               | 179            | 92                 | 57                                                        | 62.0%                |
| 32              | 1               | 99             | 75                 | 45                                                        | 60.0%                |
| 32              | 2               | 55             | 54                 | 31                                                        | 57.4%                |
| 33              | 1               | 101            | 77                 | 35                                                        | 45.5%                |
| 33              | 2               | 55             | 55                 | 34                                                        | 61.8%                |
| 34              | 1               | 807            | 117                | 59                                                        | 50.4%                |
| 34              | 6               | 344            | 115                | 42                                                        | 36.5%                |

TABLE V (Continued)

## ELK LICENSE DATA SUMMARY

| HUNT AREA  | LICENSE TYPE | NUMBER SOLD | NUMBER SURVEYED | NUMBER USABLE SURVEYS<br>(both hunters and nonhunters) | % USABLE RESPONSE |
|------------|--------------|-------------|-----------------|--------------------------------------------------------|-------------------|
| 35         | 1            | 151         | 89              | 52                                                     | 58.4%             |
| 35         | 2            | 76          | 68              | 41                                                     | 60.3%             |
| 35         | 6            | 50          | 50              | 25                                                     | 50.0%             |
| 35         | 9            | 53          | 53              | 28                                                     | 52.8%             |
| 36         | 2            | 156         | 96              | 63                                                     | 65.6%             |
| 36         | 9            | 57          | 57              | 30                                                     | 52.6%             |
| 37         | 6            | 409         | 110             | 60                                                     | 54.6%             |
| 37         | 9            | 154         | 89              | 50                                                     | 56.2%             |
| 38         | 1            | 403         | 109             | 66                                                     | 60.6%             |
| 38         | 2            | 451         | 115             | 54                                                     | 47.0%             |
| 38         | 9            | 253         | 100             | 54                                                     | 54.0%             |
| 39         | 1            | 93          | 74              | 39                                                     | 52.7%             |
| 39         | 2            | 80          | 70              | 43                                                     | 61.4%             |
| 39         | 9            | 71          | 66              | 36                                                     | 54.6%             |
| 40         | 1            | 177         | 92              | 51                                                     | 55.4%             |
| 40         | 2            | 103         | 77              | 47                                                     | 61.0%             |
| 40         | 9            | 54          | 54              | 33                                                     | 61.1%             |
| 41, 42     | 1            | 355         | 161             | 86                                                     | 53.4%             |
| 41, 42     | 2            | 327         | 158             | 98                                                     | 62.0%             |
| 41, 42     | 9            | 106         | 106             | 58                                                     | 54.7%             |
| 45, 46     | 1            | 351         | 161             | 99                                                     | 61.5%             |
| 45         | 2            | 179         | 92              | 45                                                     | 48.9%             |
| 45, 46     | 3            | 155         | 133             | 82                                                     | 61.7%             |
| 45, 46     | 9            | 142         | 130             | 68                                                     | 52.3%             |
| 47         | 1            | 102         | 77              | 42                                                     | 54.6%             |
| 47         | 3            | 25          | 25              | 19                                                     | 76.0%             |
| 47         | 6            | 50          | 50              | 24                                                     | 48.0%             |
| 48         | 1            | 302         | 104             | 58                                                     | 55.8%             |
| 48         | 2            | 68          | 68              | 40                                                     | 58.8%             |
| 48         | 6            | 428         | 111             | 46                                                     | 41.4%             |
| 49         | 1            | 277         | 102             | 52                                                     | 51.0%             |
| 49         | 2            | 72          | 69              | 31                                                     | 44.9%             |
| 49         | 6            | 251         | 100             | 61                                                     | 61.0%             |
| 50         | 1            | 27          | 27              | 12                                                     | 44.4%             |
| 50         | 2            | 41          | 41              | 16                                                     | 39.0%             |
| 50         | 9            | 12          | 11              | 6                                                      | 54.6%             |
| 51         | 1            | 42          | 37              | 19                                                     | 51.4%             |
| 51, 52     | 2            | 153         | 133             | 86                                                     | 64.7%             |
| 51         | 9            | 30          | 30              | 23                                                     | 76.7%             |
| 52         | 1            | 28          | 26              | 18                                                     | 69.2%             |
| 52         | 9            | 6           | 6               | 3                                                      | 50.0%             |
| 53, 54, 65 | 1            | 51          | 51              | 28                                                     | 54.9%             |
| 53, 54, 65 | 2            | 150         | 133             | 74                                                     | 55.6%             |
| 53, 54, 65 | 6            | 150         | 133             | 71                                                     | 53.4%             |
| 53, 54, 65 | 9            | 26          | 26              | 12                                                     | 46.2%             |
| 54         | 3            | 25          | 25              | 16                                                     | 64.0%             |
| 55         | 1            | 25          | 23              | 15                                                     | 65.2%             |
| 55         | 2            | 75          | 68              | 40                                                     | 58.8%             |
| 55         | 9            | 19          | 19              | 12                                                     | 63.2%             |
| 56         | 1            | 47          | 40              | 26                                                     | 65.0%             |
| 56         | 2            | 168         | 100             | 53                                                     | 53.0%             |
| 56         | 3            | 50          | 50              | 21                                                     | 42.0%             |
| 56         | 9            | 23          | 23              | 15                                                     | 65.2%             |
| 58         | 1            | 70          | 56              | 39                                                     | 69.6%             |
| 58         | 2            | 151         | 89              | 37                                                     | 41.6%             |
| 59         | 1            | 13          | 12              | 9                                                      | 75.0%             |
| 59         | 2            | 154         | 90              | 47                                                     | 52.2%             |
| 59         | 6            | 101         | 77              | 36                                                     | 46.8%             |
| 59         | 9            | 33          | 33              | 11                                                     | 33.3%             |
| 60         | 9            | 19          | 19              | 9                                                      | 47.4%             |
| 61         | 1            | 157         | 89              | 52                                                     | 58.4%             |
| 61         | 2            | 28          | 27              | 17                                                     | 63.0%             |
| 61         | 3            | 82          | 82              | 38                                                     | 46.3%             |
| 62         | 1            | 158         | 89              | 56                                                     | 62.9%             |
| 62         | 2            | 54          | 54              | 33                                                     | 61.1%             |
| 62         | 3            | 155         | 89              | 51                                                     | 57.3%             |



TABLE V (Continued)

## ELK LICENSE DATA SUMMARY

| HUNT AREA  | LICENSE TYPE | NUMBER SOLD | NUMBER SURVEYED | NUMBER USABLE SURVEYS<br>(both hunters and nonhunters) | % USABLE RESPONSE |
|------------|--------------|-------------|-----------------|--------------------------------------------------------|-------------------|
| 63, 64     | 1            | 210         | 144             | 82                                                     | 56.9%             |
| 63         | 2            | 159         | 92              | 53                                                     | 57.6%             |
| 63         | 6            | 100         | 75              | 44                                                     | 58.7%             |
| 64         | 2            | 103         | 77              | 47                                                     | 61.0%             |
| 64         | 6            | 125         | 83              | 43                                                     | 51.8%             |
| 65         | 5            | 95          | 75              | 13                                                     | 17.3%             |
| 65         | 7            | 103         | 75              | 42                                                     | 56.0%             |
| 67, 68     | 2            | 255         | 150             | 84                                                     | 56.0%             |
| 67, 68, 69 | 9            | 129         | 125             | 76                                                     | 60.8%             |
| 69         | 6            | 50          | 50              | 28                                                     | 56.0%             |
| 73         | 2            | 9           | 9               | 3                                                      | 33.3%             |
| 73         | 6            | 49          | 46              | 18                                                     | 39.1%             |
| 75         | 1            | 106         | 77              | 50                                                     | 64.9%             |
| 75         | 2            | 240         | 109             | 67                                                     | 61.5%             |
| 78         | 1            | 27          | 27              | 17                                                     | 63.0%             |
| 78         | 2            | 25          | 25              | 13                                                     | 52.0%             |
| 78         | 6            | 75          | 68              | 33                                                     | 48.5%             |
| 79         | 1            | 200         | 96              | 64                                                     | 66.7%             |
| 79         | 2            | 58          | 58              | 33                                                     | 56.9%             |
| 79         | 6            | 300         | 104             | 63                                                     | 60.6%             |
| 80         | 2            | 7           | 6               | 3                                                      | 50.0%             |
| 81         | 2            | 28          | 28              | 14                                                     | 50.0%             |
| 82         | 2            | 25          | 26              | 18                                                     | 69.2%             |
| 83         | 2            | 31          | 31              | 15                                                     | 48.4%             |
| 84         | 1            | 22          | 22              | 8                                                      | 36.4%             |
| 84         | 2            | 49          | 49              | 28                                                     | 57.1%             |
| 84         | 6            | 275         | 105             | 48                                                     | 45.7%             |
| 85         | 1            | 20          | 20              | 10                                                     | 50.0%             |
| 85         | 2            | 50          | 50              | 34                                                     | 68.0%             |
| 85         | 6            | 277         | 102             | 59                                                     | 57.8%             |
| 87         | 6            | 56          | 50              | 19                                                     | 38.0%             |
| 88         | 1            | 60          | 60              | 38                                                     | 63.3%             |
| 90         | 6            | 101         | 64              | 27                                                     | 42.2%             |
| 91         | 1            | 355         | 108             | 42                                                     | 38.9%             |
| 91         | 6            | 100         | 75              | 42                                                     | 56.0%             |
| 92         | 6            | 203         | 96              | 46                                                     | 47.9%             |
| 93         | 1            | 155         | 89              | 48                                                     | 53.9%             |
| 93         | 2            | 26          | 26              | 13                                                     | 50.0%             |
| 93         | 6            | 140         | 98              | 51                                                     | 52.0%             |
| 94         | 1            | 62          | 60              | 32                                                     | 53.3%             |
| 94         | 6            | 276         | 104             | 45                                                     | 43.3%             |
| 95         | 1            | 155         | 89              | 57                                                     | 64.0%             |
| 95         | 2            | 248         | 100             | 58                                                     | 58.0%             |
| 95         | 3            | 32          | 32              | 18                                                     | 56.3%             |
| 95         | 4            | 11          | 11              | 8                                                      | 72.7%             |
| 95         | 6            | 25          | 25              | 16                                                     | 64.0%             |
| 96         | 1            | 206         | 96              | 52                                                     | 54.2%             |
| 96         | 2            | 9           | 8               | 4                                                      | 50.0%             |
| 96         | 6            | 75          | 68              | 36                                                     | 52.9%             |
| 97         | 1            | 301         | 104             | 56                                                     | 53.9%             |
| 97         | 2            | 16          | 16              | 11                                                     | 68.8%             |
| 97         | 6            | 75          | 68              | 43                                                     | 63.2%             |
| 98         | 1            | 353         | 108             | 61                                                     | 56.5%             |
| 98         | 2            | 86          | 75              | 35                                                     | 46.7%             |
| 98         | 6            | 151         | 89              | 43                                                     | 48.3%             |
| 99         | 1            | 179         | 92              | 47                                                     | 51.1%             |
| 99         | 2            | 228         | 98              | 56                                                     | 57.1%             |
| 100        | 1            | 233         | 98              | 60                                                     | 61.2%             |
| 100        | 2            | 202         | 96              | 53                                                     | 55.2%             |
| 103        | 6            | 53          | 53              | 33                                                     | 62.3%             |
| 104        | 6            | 151         | 82              | 37                                                     | 45.1%             |
| 106        | 1            | 34          | 34              | 15                                                     | 44.1%             |
| 106        | 2            | 149         | 89              | 33                                                     | 37.1%             |
| 106        | 6            | 25          | 25              | 12                                                     | 48.0%             |
| 107        | 2            | 101         | 77              | 40                                                     | 52.0%             |
| 108        | 1            | 61          | 60              | 32                                                     | 53.3%             |
| 108        | 2            | 84          | 75              | 55                                                     | 73.3%             |
| 108        | 3            | 13          | 13              | 10                                                     | 76.9%             |
| 110        | 2            | 76          | 68              | 45                                                     | 66.2%             |

TABLE V (Continued)

## ELK LICENSE DATA SUMMARY

| HUNT AREA | LICENSE TYPE | NUMBER<br>SOLD | NUMBER<br>SURVEYED | NUMBER<br>USABLE SURVEYS<br>(both hunters and nonhunters) | % USABLE<br>RESPONSE |
|-----------|--------------|----------------|--------------------|-----------------------------------------------------------|----------------------|
| 111       | 1            | 47             | 47                 | 25                                                        | 53.2%                |
| 111       | 2            | 95             | 75                 | 47                                                        | 62.7%                |
| 111       | 3            | 53             | 53                 | 29                                                        | 54.7%                |
| 113       | 1            | 47             | 43                 | 24                                                        | 55.8%                |
| 113       | 2            | 61             | 60                 | 33                                                        | 55.0%                |
| 114       | 1            | 51             | 51                 | 32                                                        | 62.8%                |
| 114       | 2            | 41             | 41                 | 19                                                        | 46.3%                |
| 114       | 6            | 50             | 50                 | 25                                                        | 50.0%                |
| 116       | 1            | 178            | 92                 | 45                                                        | 48.9%                |
| 116       | 2            | 150            | 89                 | 40                                                        | 44.9%                |
| 116       | 6            | 100            | 75                 | 37                                                        | 49.3%                |
| 117       | 1            | 232            | 98                 | 54                                                        | 55.1%                |
| 117       | 2            | 175            | 92                 | 47                                                        | 51.1%                |
| 117       | 6            | 62             | 60                 | 29                                                        | 48.3%                |
| 118       | 1            | 38             | 38                 | 21                                                        | 55.3%                |
| 118       | 2            | 38             | 38                 | 20                                                        | 52.6%                |
| 118       | 6            | 36             | 36                 | 19                                                        | 52.8%                |
| 120       | 1            | 109            | 79                 | 40                                                        | 50.6%                |
| 120       | 2            | 102            | 77                 | 42                                                        | 54.6%                |
| 120       | 3            | 74             | 68                 | 30                                                        | 44.1%                |
| 121       | 1            | 105            | 77                 | 40                                                        | 52.0%                |
| 121       | 2            | 125            | 83                 | 47                                                        | 56.6%                |
| 121       | 3            | 36             | 35                 | 16                                                        | 45.7%                |
| 121       | 6            | 100            | 75                 | 40                                                        | 53.3%                |
| 122       | 1            | 51             | 51                 | 19                                                        | 37.3%                |
| 122       | 2            | 5              | 5                  | 1                                                         | 20.0%                |
| 122       | 6            | 33             | 31                 | 8                                                         | 25.8%                |
| 123       | 2            | 100            | 75                 | 36                                                        | 48.0%                |
| 124       | 1            | 18             | 18                 | 11                                                        | 61.1%                |
| 124       | 2            | 62             | 60                 | 33                                                        | 55.0%                |
| 125       | 1            | 138            | 89                 | 47                                                        | 52.8%                |
| 125       | 2            | 13             | 13                 | 6                                                         | 46.2%                |
| 125       | 6            | 76             | 68                 | 38                                                        | 55.9%                |
| 126       | 1            | 27             | 27                 | 13                                                        | 48.2%                |
| 126       | 2            | 35             | 35                 | 18                                                        | 51.4%                |
| 128       | 6            | 20             | 20                 | 9                                                         | 45.0%                |
| 129       | 6            | 67             | 65                 | 29                                                        | 44.6%                |
| TOTAL     |              | 59763          | 35989              | 16926                                                     | 47.0%                |

\* Actual downloads exceed WG&amp;F sales data.

# WYOMING GAME AND FISH COMMISSION

## CHAPTER 7

### ELK HUNTING SEASONS

Section 1. Authority. This regulation is promulgated by authority of W.S. §23-1-302, §23-1-703 and §23-2-104.

Section 2. Hunting Seasons Established. There shall be open seasons during 2007 and January, 2008 for the hunting of elk as set forth in this Chapter and in accordance with Chapter 2, General Hunting Regulation.

Section 3. Regular Hunting Seasons.

(a) Hunt areas, season dates and limitations.

| Hunt Area | Type | Date of Seasons |          | Limitations                                                                                                                                                                                               |
|-----------|------|-----------------|----------|-----------------------------------------------------------------------------------------------------------------------------------------------------------------------------------------------------------|
|           |      | Opens           | Closes   |                                                                                                                                                                                                           |
| *1        | 1    | Oct. 15         | Nov. 30  | Limited quota; 150 licenses any elk                                                                                                                                                                       |
|           | 2    | Oct. 15         | Nov. 30  | Limited quota; 100 licenses antlerless elk                                                                                                                                                                |
| 2         | 1    | Oct. 22         | Oct. 31  | Limited quota; 35 licenses any elk                                                                                                                                                                        |
|           | 2    | Oct. 22         | Oct. 31  | Limited quota; 35 licenses antlerless elk                                                                                                                                                                 |
|           | 6    | Sept. 12        | Sept. 18 | Limited quota; 40 licenses cow or calf                                                                                                                                                                    |
| 3         | 1    | Sept. 15        | Oct. 14  | Limited quota; 50 licenses any elk                                                                                                                                                                        |
|           | 2    | Sept. 15        | Oct. 14  | Limited quota; 50 licenses antlerless elk                                                                                                                                                                 |
|           | 6    | Sept. 15        | Oct. 14  | Limited quota; 50 licenses cow or calf                                                                                                                                                                    |
|           |      | Nov. 1          | Dec. 15  | Unused Area 3 Type 1, Type 2, and Type 6 licenses valid for antlerless elk                                                                                                                                |
| *5        | 1    | Oct. 1          | Dec. 15  | Limited quota; 250 licenses any elk                                                                                                                                                                       |
|           | 6    | Oct. 1          | Dec. 15  | Limited quota; 250 licenses cow or calf                                                                                                                                                                   |
| *6        | 1    | Oct. 20         | Nov. 11  | Limited quota; 150 licenses any elk                                                                                                                                                                       |
|           |      | Nov. 12         | Jan. 31  | Unused Area 6 Type 1 licenses valid for antlerless elk off national forest                                                                                                                                |
|           | 2    | Oct. 20         | Jan. 31  | Limited quota; 100 licenses antlerless elk off national forest                                                                                                                                            |
|           | 6    | Oct. 1          | Jan. 31  | Limited quota; 100 licenses cow or calf off national forest                                                                                                                                               |
| *7        | 1    | Oct. 15         | Nov. 25  | Limited quota; 1,500 licenses any elk                                                                                                                                                                     |
|           | 2    | Oct. 15         | Nov. 25  | Limited quota; 1,000 licenses antlerless elk                                                                                                                                                              |
|           | 3    | Nov. 1          | Nov. 25  | Limited quota; 500 licenses antlerless elk                                                                                                                                                                |
|           | 5    | Aug. 25         | Sept. 9  | Limited quota; 100 licenses cow or calf valid in that portion of Area 7 in Converse County off national forest                                                                                            |
|           | 6    | Oct. 15         | Nov. 25  | Limited quota; 500 licenses cow or calf                                                                                                                                                                   |
|           |      | Dec. 1          | Dec. 16  | Unused Area 7 Type 1, Type 2, Type 3, Type 5 and Type 6 licenses valid for antlerless elk, except that the Wyoming Game and Fish Commission Laramie Peak Wildlife Habitat Management Area will be closed. |
|           |      | Dec. 17         | Jan. 4   | Unused Area 7 Type 1, Type 2, Type 3, Type 5 and Type 6 licenses valid for antlerless elk, valid in that portion of Area 7 in Converse County                                                             |
|           |      | Jan. 5          | Jan. 20  | Unused Area 7 Type 1, Type 2, Type 3, Type 5 and Type 6 licenses valid for antlerless elk, except that the Wyoming Game and Fish Commission Laramie Peak Wildlife Habitat Management Area will be closed. |

| Hunt Area        | Type | Date of Seasons |         | Limitations                                                                                                                                                                                                                                                                                                                                              |
|------------------|------|-----------------|---------|----------------------------------------------------------------------------------------------------------------------------------------------------------------------------------------------------------------------------------------------------------------------------------------------------------------------------------------------------------|
|                  |      | Opens           | Closes  |                                                                                                                                                                                                                                                                                                                                                          |
|                  |      | Jan. 21         | Jan. 31 | Unused Area 7 Type 1, Type 2, Type 3, Type 5 and Type 6 licenses valid for antlerless elk, valid in that portion of Area 7 in Converse County                                                                                                                                                                                                            |
|                  | 7    | Sept. 1         | Oct. 14 | Limited quota; 100 licenses cow or calf valid in that portion of Area 7 south and east of the Fetterman Road (Albany County Road 61), south and west of the Garrett Road (Albany County Road 713) and south of the Tunnel Road (Albany County Road 727 - Platte County Road 266) or in that portion of Area 7 in Platte County north of Cottonwood Creek |
| *8               | 1    | Oct. 1          | Oct. 31 | Limited quota; 125 licenses any elk                                                                                                                                                                                                                                                                                                                      |
|                  |      | Nov. 1          | Dec. 31 | Unused Area 8 Type 1 licenses; valid for antlerless elk                                                                                                                                                                                                                                                                                                  |
| 9                |      | Oct. 15         | Oct. 21 | General license; any elk                                                                                                                                                                                                                                                                                                                                 |
|                  |      | Oct. 22         | Oct. 31 | General license; antlered elk                                                                                                                                                                                                                                                                                                                            |
| 10               |      | Oct. 15         | Oct. 31 | General license; any elk                                                                                                                                                                                                                                                                                                                                 |
|                  | 2    | Oct. 1          | Nov. 30 | Limited quota; 100 licenses antlerless elk                                                                                                                                                                                                                                                                                                               |
|                  | 6    | Oct. 1          | Nov. 30 | Limited quota; 150 licenses cow or calf                                                                                                                                                                                                                                                                                                                  |
| 11               | 1    | Oct. 9          | Oct. 31 | Limited quota; 150 licenses any elk                                                                                                                                                                                                                                                                                                                      |
|                  | 2    | Oct. 9          | Oct. 31 | Limited quota; 300 licenses antlerless elk                                                                                                                                                                                                                                                                                                               |
|                  |      | Nov. 1          | Nov. 14 | Unused Area 11 Type 2 licenses valid in that portion of Area 11 off national forest and off the Wyoming Game and Fish Commission's Wick Brothers Wildlife Habitat Management Area                                                                                                                                                                        |
| 12               |      | Oct. 15         | Oct. 31 | General license; any elk                                                                                                                                                                                                                                                                                                                                 |
|                  | 2    | Oct. 15         | Nov. 5  | Limited quota; 150 licenses antlerless elk                                                                                                                                                                                                                                                                                                               |
| 12, *13, 15, 110 | 6    | Sept. 1         | Jan. 31 | Limited quota; 75 licenses cow or calf valid on private land                                                                                                                                                                                                                                                                                             |
| *13              |      | Oct. 15         | Oct. 31 | General license; any elk                                                                                                                                                                                                                                                                                                                                 |
|                  | 2    | Oct. 15         | Nov. 14 | Limited quota; 150 licenses antlerless elk                                                                                                                                                                                                                                                                                                               |
| 15, *21          |      | Oct. 15         | Oct. 24 | General license; antlered elk                                                                                                                                                                                                                                                                                                                            |
|                  |      | Oct. 25         | Nov. 4  | General license; antlerless elk                                                                                                                                                                                                                                                                                                                          |
| 15               | 2    | Oct. 15         | Nov. 14 | Limited quota; 150 licenses antlerless elk                                                                                                                                                                                                                                                                                                               |
| *16              | 1    | Oct. 1          | Oct. 14 | Limited quota; 200 licenses any elk                                                                                                                                                                                                                                                                                                                      |
|                  |      | Nov. 1          | Nov. 20 | Unused Area 16 Type 1 licenses valid on the Beer Mug Mountain Hunter Management Area                                                                                                                                                                                                                                                                     |
|                  | 2    | Oct. 1          | Oct. 14 | Limited quota; 225 licenses antlerless elk                                                                                                                                                                                                                                                                                                               |
|                  | 6    | Oct. 1          | Oct. 14 | Limited quota; 150 licenses cow or calf                                                                                                                                                                                                                                                                                                                  |
|                  |      | Nov. 1          | Nov. 20 | Unused Area 16 Type 2 and Type 6 licenses valid for antlerless elk                                                                                                                                                                                                                                                                                       |
|                  | 7    | Oct. 1          | Oct. 14 | Limited quota; 35 licenses cow or calf                                                                                                                                                                                                                                                                                                                   |
|                  |      | Oct. 26         | Nov. 30 | Unused Area 16 Type 7 licenses                                                                                                                                                                                                                                                                                                                           |
|                  |      | Dec. 1          | Dec. 14 | Unused Area 16 Type 2, Type 6 and Type 7 licenses valid in that portion of Area 16 north of Canyon Creek and west of the Bolton Creek Road (Natrona County Road 404 – Carbon County Road 103) and in that portion of Area 23 between the North Platte River and U.S. Highway 220.                                                                        |

| Hunt Area | Type | Date of Seasons |         | Limitations                                                                                                                                                                                                           |
|-----------|------|-----------------|---------|-----------------------------------------------------------------------------------------------------------------------------------------------------------------------------------------------------------------------|
|           |      | Opens           | Closes  |                                                                                                                                                                                                                       |
| 19        | 1    | Oct. 1          | Oct. 14 | Limited quota; 150 licenses any elk                                                                                                                                                                                   |
|           | 2    | Nov. 1          | Nov. 25 | Limited quota; 150 licenses any elk                                                                                                                                                                                   |
|           | 3    | Oct. 1          | Oct. 14 | Limited quota; 125 licenses antlerless elk                                                                                                                                                                            |
|           | 4    | Nov. 1          | Nov. 25 | Limited quota; 125 licenses antlerless elk                                                                                                                                                                            |
|           | 6    | Oct. 1          | Oct. 14 | Limited quota; 150 licenses cow or calf                                                                                                                                                                               |
|           |      | Nov. 1          | Nov. 25 | Unused Area 19 Type 6 licenses                                                                                                                                                                                        |
|           |      | Dec. 1          | Dec. 16 | Unused Area 19 Type 1, Type 2, Type 3, Type 4 and Type 6 licenses valid for antlerless elk                                                                                                                            |
| 21        | 2    | Oct. 25         | Nov. 30 | Limited quota; 650 licenses antlerless elk                                                                                                                                                                            |
|           | 6    | Aug. 15         | Aug. 30 | Limited quota; 25 licenses cow or calf valid in that portion of Area 21 off national forest south of Wyoming Highway 70 and the Baggs-Dixon Road (Carbon County Road 702)                                             |
|           |      | Sept. 1         | Dec. 15 | Unused Area 21 Type 6 licenses valid in that portion of Area 21 on national forest on Battle Mountain and all lands off national forest south of Wyoming Highway 70 and the Baggs-Dixon Road (Carbon County Road 702) |
| *22       | 1    | Oct. 8          | Oct. 21 | Limited quota; 50 licenses antlered elk                                                                                                                                                                               |
|           | 2    | Oct. 8          | Nov. 20 | Limited quota; 75 licenses antlerless elk                                                                                                                                                                             |
| 23        | 1    | Oct. 1          | Oct. 31 | Limited quota; 100 licenses any elk                                                                                                                                                                                   |
|           | 2    | Oct. 1          | Oct. 31 | Limited quota; 100 licenses antlerless elk                                                                                                                                                                            |
|           | 6    | Oct. 1          | Oct. 31 | Limited quota; 150 licenses cow or calf                                                                                                                                                                               |
|           |      | Nov. 6          | Nov. 30 | Unused Area 23 Type 1, Type 2 and Type 6 licenses valid for antlerless elk                                                                                                                                            |
| 24        | 1    | Oct. 1          | Oct. 14 | Limited quota; 125 licenses antlered elk                                                                                                                                                                              |
|           | 2    | Oct. 1          | Oct. 14 | Limited quota; 75 licenses antlerless elk                                                                                                                                                                             |
|           | 3    | Nov. 1          | Nov. 15 | Limited quota; 125 licenses antlerless elk                                                                                                                                                                            |
| 25, 27    | 1    | Oct. 1          | Oct. 31 | Limited quota; 150 licenses any elk                                                                                                                                                                                   |
|           | 2    | Oct. 1          | Oct. 31 | Limited quota; 100 licenses antlerless elk                                                                                                                                                                            |
| 25        | 6    | Oct. 1          | Oct. 31 | Limited quota; 150 licenses cow or calf                                                                                                                                                                               |
| 28        |      | Oct. 1          | Oct. 22 | General license; antlered elk                                                                                                                                                                                         |
|           | 2    | Oct. 23         | Nov. 15 | Limited quota; 200 licenses antlerless elk                                                                                                                                                                            |
|           | 6    | Oct. 23         | Nov. 15 | Limited quota; 150 licenses cow or calf                                                                                                                                                                               |
| 30        | 1    | Oct. 1          | Oct. 31 | Limited quota; 50 licenses any elk                                                                                                                                                                                    |
|           | 2    | Oct. 6          | Nov. 30 | Limited quota; 125 licenses antlerless elk                                                                                                                                                                            |
| 31        | 1    | Oct. 1          | Oct. 31 | Limited quota; 100 licenses any elk                                                                                                                                                                                   |
|           | 2    | Oct. 6          | Nov. 30 | Limited quota; 175 licenses antlerless elk                                                                                                                                                                            |
| 32        | 1    | Oct. 1          | Oct. 31 | Limited quota; 90 licenses any elk                                                                                                                                                                                    |
|           | 2    | Oct. 6          | Nov. 30 | Limited quota; 50 licenses antlerless elk                                                                                                                                                                             |
| 33        | 1    | Oct. 9          | Oct. 31 | Limited quota; 100 licenses any elk                                                                                                                                                                                   |
|           |      | Nov. 1          | Nov. 30 | Unused Area 33 Type 1 licenses valid for antlerless elk                                                                                                                                                               |
|           | 2    | Oct. 9          | Nov. 30 | Limited quota; 50 licenses antlerless elk                                                                                                                                                                             |
| 34        | 1    | Oct. 15         | Nov. 15 | Limited quota; 800 licenses any elk                                                                                                                                                                                   |
|           |      | Nov. 16         | Nov. 30 | Unused Area 34 Type 1 licenses valid for antlerless elk                                                                                                                                                               |
|           | 6    | Oct. 15         | Nov. 30 | Limited quota; 600 licenses cow or calf valid in that portion of Area 34 off national forest                                                                                                                          |

| Hunt Area | Type | Date of Seasons |          | Limitations                                                                                                                                                                                                                 |
|-----------|------|-----------------|----------|-----------------------------------------------------------------------------------------------------------------------------------------------------------------------------------------------------------------------------|
|           |      | Opens           | Closes   |                                                                                                                                                                                                                             |
| 35        | 1    | Oct. 15         | Nov. 5   | Limited quota; 150 licenses antlered elk                                                                                                                                                                                    |
|           | 2    | Oct. 15         | Nov. 30  | Limited quota; 75 licenses antlerless elk                                                                                                                                                                                   |
|           | 6    | Oct. 15         | Nov. 30  | Limited quota; 50 licenses cow or calf valid in that portion of Area 35 off national forest                                                                                                                                 |
|           | 9    | Sept. 1         | Sept. 30 | Limited quota; 50 licenses any elk, archery only                                                                                                                                                                            |
| 36        |      | Oct. 15         | Nov. 5   | General license; antlered elk                                                                                                                                                                                               |
|           | 2    | Oct. 15         | Nov. 30  | Limited quota; 200 licenses antlerless elk                                                                                                                                                                                  |
|           | 9    | Sept. 1         | Sept. 30 | Limited quota; 50 licenses any elk, archery only                                                                                                                                                                            |
| 37        |      | Oct. 15         | Nov. 5   | General license; any elk                                                                                                                                                                                                    |
|           | 6    | Oct. 1          | Nov. 30  | Limited quota; 400 licenses cow or calf                                                                                                                                                                                     |
|           |      | Dec. 1          | Dec. 16  | Unused Area 37 Type 6 licenses valid in that portion of Area 37 south and east of Little Goose Creek                                                                                                                        |
|           | 9    | Sept. 1         | Sept. 30 | Limited quota; 150 licenses any elk, archery only                                                                                                                                                                           |
| 38        | 1    | Oct. 15         | Nov. 5   | Limited quota; 400 licenses any elk                                                                                                                                                                                         |
|           |      | Nov. 6          | Nov. 15  | Unused Area 38 Type 1 licenses valid for antlerless elk                                                                                                                                                                     |
|           | 2    | Oct. 15         | Nov. 15  | Limited quota; 600 licenses antlerless elk valid in that portion of Area 38 north of Columbus Creek, the Fools Creek Road (U.S.F.S. Road 168), the Burgess Road (U.S.F.S. Road 15) to Burgess Junction and U.S. Highway 14A |
|           | 9    | Sept. 1         | Sept. 30 | Limited quota; 250 licenses any elk, archery only                                                                                                                                                                           |
| 39        | 1    | Oct. 15         | Nov. 4   | Limited quota; 90 licenses any elk                                                                                                                                                                                          |
|           | 2    | Oct. 15         | Nov. 4   | Limited quota; 75 licenses antlered elk                                                                                                                                                                                     |
|           | 9    | Sept. 1         | Sept. 30 | Limited quota; 70 licenses any elk, archery only                                                                                                                                                                            |
| 40        | 1    | Oct. 15         | Nov. 4   | Limited quota; 175 licenses any elk                                                                                                                                                                                         |
|           | 2    | Oct. 15         | Nov. 15  | Limited quota; 100 licenses antlerless elk                                                                                                                                                                                  |
|           | 9    | Sept. 1         | Sept. 30 | Limited quota; 50 licenses any elk, archery only                                                                                                                                                                            |
| 41, 42    | 1    | Oct. 15         | Nov. 4   | Limited quota; 350 licenses any elk                                                                                                                                                                                         |
|           | 2    | Oct. 15         | Nov. 15  | Limited quota; 325 licenses antlerless elk                                                                                                                                                                                  |
|           |      | Nov. 16         | Nov. 25  | Unused Area 41, 42 Type 2 licenses antlerless elk valid in Area 41                                                                                                                                                          |
|           | 9    | Sept. 1         | Sept. 30 | Limited quota; 100 licenses any elk, archery only                                                                                                                                                                           |
| 45, 46    | 1    | Oct. 15         | Nov. 4   | Limited quota; 350 licenses any elk                                                                                                                                                                                         |
|           | 3    | Oct. 15         | Nov. 15  | Limited quota; 150 licenses antlerless elk                                                                                                                                                                                  |
|           | 9    | Sept. 1         | Sept. 30 | Limited quota; 140 licenses any elk, archery only                                                                                                                                                                           |
| 45        | 2    | Oct. 1          | Oct. 9   | Limited quota; 175 licenses antlerless elk valid in that portion of Area 45 off national forest                                                                                                                             |
|           |      | Oct. 10         | Nov. 15  | Unused Area 45 Type 2 licenses valid for antlerless elk in the entire area                                                                                                                                                  |
| 47        | 1    | Oct. 9          | Oct. 31  | Limited quota; 100 licenses any elk                                                                                                                                                                                         |
|           | 3    | Oct. 9          | Oct. 31  | Limited quota; 25 licenses any elk valid in that portion of Area 47 in Fremont County                                                                                                                                       |
|           | 6    | Oct. 9          | Oct. 31  | Limited quota; 50 licenses cow or calf                                                                                                                                                                                      |
| 48        | 1    | Oct. 9          | Oct. 31  | Limited quota; 300 licenses any elk                                                                                                                                                                                         |
|           | 2    | Oct. 9          | Oct. 31  | Limited quota; 100 licenses antlerless elk                                                                                                                                                                                  |
|           | 6    | Oct. 9          | Oct. 31  | Limited quota; 450 licenses cow or calf                                                                                                                                                                                     |
|           |      | Nov. 10         | Nov. 30  | Unused Area 48 Type 1, Type 2 and Type 6 licenses valid for antlerless elk                                                                                                                                                  |

| Hunt Area | Type | Date of Seasons |          | Limitations                                                                                                                  |
|-----------|------|-----------------|----------|------------------------------------------------------------------------------------------------------------------------------|
|           |      | Opens           | Closes   |                                                                                                                              |
| 49        | 1    | Oct. 9          | Oct. 31  | Limited quota; 275 licenses any elk                                                                                          |
|           |      | Nov. 1          | Nov. 30  | Unused Area 49 Type 1 licenses valid for antlerless elk                                                                      |
|           | 2    | Oct. 9          | Nov. 30  | Limited quota; 100 licenses antlerless elk                                                                                   |
|           | 6    | Sept. 1         | Nov. 30  | Limited quota; 250 licenses cow or calf                                                                                      |
| 50        |      | Oct. 1          | Oct. 21  | General license; antlered elk                                                                                                |
|           | 1    | Nov. 18         | Dec. 7   | Limited quota; 20 licenses any elk                                                                                           |
|           | 2    | Nov. 16         | Dec. 21  | Limited quota; 40 licenses antlerless elk                                                                                    |
|           | 9    | Sept. 1         | Sept. 30 | Limited quota; 15 licenses any elk, archery only                                                                             |
| 51        |      | Oct. 1          | Oct. 21  | General license; antlered elk                                                                                                |
|           | 1    | Nov. 18         | Dec. 7   | Limited quota; 35 licenses any elk                                                                                           |
|           | 9    | Sept. 1         | Sept. 30 | Limited quota; 25 licenses any elk, archery only                                                                             |
| 51, 52    | 2    | Nov. 16         | Dec. 21  | Limited quota; 150 licenses antlerless elk                                                                                   |
| 52        |      | Oct. 1          | Oct. 21  | General license; antlered elk                                                                                                |
|           | 1    | Nov. 18         | Dec. 7   | Limited quota; 25 licenses any elk                                                                                           |
|           | 9    | Sept. 1         | Sept. 30 | Limited quota; 15 licenses any elk, archery only                                                                             |
| 53        |      | Oct. 1          | Oct. 21  | General license; antlered elk                                                                                                |
| 53,54,65  | 1    | Nov. 1          | Nov. 30  | Limited quota; 50 licenses any elk                                                                                           |
|           | 2    | Nov. 1          | Dec. 31  | Limited quota; 150 licenses antlerless elk; also valid in Area 121                                                           |
|           | 6    | Nov. 1          | Dec. 31  | Limited quota; 150 licenses cow or calf; also valid in Area 121                                                              |
|           | 9    | Sept. 1         | Sept. 30 | Limited quota; 25 licenses any elk, archery only                                                                             |
| 54        | 3    | Sept. 1         | Sept. 30 | Limited quota; 25 licenses antlerless elk valid in that portion of Area 54 off national forest                               |
| 55        |      | Oct. 1          | Oct. 21  | General license; antlered elk                                                                                                |
|           | 1    | Nov. 18         | Dec. 7   | Limited quota; 20 licenses any elk                                                                                           |
|           | 2    | Nov. 16         | Dec. 21  | Limited quota; 75 licenses antlerless elk                                                                                    |
|           | 9    | Sept. 1         | Sept. 30 | Limited quota; 20 licenses any elk, archery only                                                                             |
| 56        |      | Oct. 1          | Oct. 21  | General license; antlered elk                                                                                                |
|           | 1    | Nov. 18         | Dec. 7   | Limited quota; 35 licenses any elk                                                                                           |
|           |      | Nov. 1          | Nov. 15  | Limited quota; 250 licenses antlerless elk valid in that portion of Area 56 in the South Fork of the Shoshone River drainage |
|           |      | Nov. 16         | Dec. 21  | Unused Area 56 Type 2 licenses valid in the entire area                                                                      |
|           | 3    | Nov. 1          | Dec. 31  | Limited quota; 50 licenses antlerless elk valid in that portion of Area 56 off national forest                               |
|           | 9    | Sept. 1         | Sept. 30 | Limited quota; 30 licenses any elk, archery only                                                                             |
| 58        | 1    | Oct. 1          | Nov. 30  | Limited quota; 50 licenses any elk                                                                                           |
|           | 2    | Oct. 1          | Dec. 21  | Limited quota; 150 licenses antlerless elk                                                                                   |
| 59        |      | Oct. 1          | Oct. 21  | General license; antlered elk                                                                                                |
|           | 1    | Nov. 1          | Nov. 15  | Limited quota; 10 licenses any elk valid in that portion of Area 59 on national forest                                       |
|           | 2    | Nov. 1          | Dec. 21  | Limited quota; 150 licenses antlerless elk                                                                                   |
|           | 6    | Nov. 1          | Dec. 21  | Limited quota; 100 licenses cow or calf                                                                                      |
|           | 9    | Sept. 1         | Sept. 30 | Limited quota; 25 licenses any elk, archery only                                                                             |
| 60        |      | Sept. 10        | Oct. 21  | General license; any elk                                                                                                     |
|           | 9    | Sept. 1         | Sept. 30 | Limited quota; 20 licenses any elk, archery only                                                                             |

| Hunt Area | Type | Date of Seasons |          | Limitations                                                                                                                                                   |
|-----------|------|-----------------|----------|---------------------------------------------------------------------------------------------------------------------------------------------------------------|
|           |      | Opens           | Closes   |                                                                                                                                                               |
| 61        |      | Nov. 1          | Nov. 30  | General license; antlerless elk valid in that portion of Area 61 north of and including the Rawhide Creek drainage                                            |
|           | 1    | Oct. 1          | Oct. 21  | Limited quota; 150 licenses any elk valid in that portion of Area 61 within the Washakie Wilderness                                                           |
|           | 2    | Nov. 1          | Nov. 15  | Limited quota; 25 licenses any elk valid in that portion of Area 61 outside the Washakie Wilderness; also valid in Area 66 from Nov. 1 to Nov. 15 for any elk |
|           | 3    | Dec. 1          | Dec. 21  | Limited quota; 150 licenses antlerless elk                                                                                                                    |
| 62        | 1    | Oct. 1          | Oct. 21  | Limited quota; 150 licenses any elk                                                                                                                           |
|           | 2    | Oct. 1          | Oct. 21  | Limited quota; 50 licenses antlerless elk                                                                                                                     |
|           | 3    | Oct. 22         | Nov. 15  | Limited quota; 150 licenses antlerless elk                                                                                                                    |
| 63, 64    | 1    | Oct. 1          | Oct. 21  | Limited quota; 200 licenses any elk                                                                                                                           |
| 63        | 2    | Oct. 1          | Nov. 25  | Limited quota; 175 licenses antlerless elk                                                                                                                    |
|           | 6    | Sept. 1         | Sept. 30 | Limited quota; 100 licenses cow or calf valid in that portion of Area 63 north of Gooseberry Creek off national forest                                        |
|           |      | Oct. 1          | Nov. 25  | Unused Area 63 Type 6 licenses valid for cow or calf elk in Area 63                                                                                           |
| 64        | 2    | Nov. 1          | Nov. 15  | Limited quota; 100 licenses any elk                                                                                                                           |
|           | 6    | Nov. 1          | Nov. 30  | Limited quota; 125 licenses cow or calf                                                                                                                       |
|           |      | Dec. 1          | Dec. 15  | Unused Area 64 Type 6 licenses valid in that portion of Area 64 south of and including the Cottonwood Creek drainage                                          |
| 65        | 7    | Sept. 1         | Sept. 30 | Limited quota; 100 licenses cow or calf                                                                                                                       |
|           | 5    | Oct. 1          | Oct. 31  | Limited quota; 100 licenses cow or calf                                                                                                                       |
| 66        |      | Sept. 10        | Nov. 15  | General license; antlerless elk                                                                                                                               |
| 67, 68    |      | Oct. 1          | Oct. 31  | General license; antlered elk                                                                                                                                 |
|           | 2    | Nov. 1          | Nov. 20  | Limited quota; 250 licenses antlerless elk                                                                                                                    |
| 67,68,69  | 9    | Sept. 1         | Sept. 30 | Limited quota; 125 licenses any elk, archery only                                                                                                             |
| 69        |      | Oct. 1          | Oct. 31  | General license; any elk                                                                                                                                      |
|           |      | Nov. 1          | Nov. 20  | General license; antlerless elk                                                                                                                               |
|           | 6    | Oct. 1          | Nov. 20  | Limited quota; 50 licenses cow or calf                                                                                                                        |
| 70        |      | Sept. 20        | Oct. 31  | General license; antlered elk. SEE SECTION 5                                                                                                                  |
|           |      | Nov. 1          | Nov. 15  | General license; antlered elk valid in that portion of Area 70 north and west of Pacific Creek and Mink Creek. SEE SECTION 5                                  |
| 71        |      | Sept. 20        | Nov. 15  | General license; antlered elk. SEE SECTION 5                                                                                                                  |
| 72        |      |                 |          | CLOSED                                                                                                                                                        |
| 73        |      | Sept. 20        | Oct. 31  | General license; any elk                                                                                                                                      |
|           | 2    | Sept. 10        | Oct. 31  | Limited quota; 25 licenses antlerless elk                                                                                                                     |
|           | 6    | Sept. 10        | Oct. 31  | Limited quota; 50 licenses cow or calf valid in that portion of Area 73 south of Teton Creek                                                                  |
|           |      | Nov. 1          | Jan. 31  | Unused Area 73 Type 6 licenses valid for cow or calf on private land                                                                                          |
| 74        |      | Sept. 26        | Oct. 31  | General license; any elk. SEE SECTION 5                                                                                                                       |
|           |      | Nov. 1          | Nov. 25  | General license; antlerless elk. SEE SECTION 5                                                                                                                |
| 75        | 1    | Oct. 20         | Nov. 25  | Limited quota; 100 licenses any elk, antlerless elk on hayfields and Antelope Flats portion of Area 75. SEE SECTIONS 5 and 6                                  |
|           | 2    | Oct. 20         | Nov. 25  | Limited quota; 400 licenses antlerless elk. SEE SECTIONS 5 and 6                                                                                              |



| Hunt Area | Type | Date of Seasons |         | Limitations                                                                                                                                                                                                                                                               |
|-----------|------|-----------------|---------|---------------------------------------------------------------------------------------------------------------------------------------------------------------------------------------------------------------------------------------------------------------------------|
|           |      | Opens           | Closes  |                                                                                                                                                                                                                                                                           |
| 77        |      | Oct. 13         | Oct. 14 | General license and unused limited quota licenses, excluding limited quota cow or calf licenses and limited quota archery only licenses, valid for any elk; 70 National Elk Refuge permits may be issued only for youths 12 through 17 years of age. SEE SECTIONS 5 and 6 |
|           |      | Oct. 15         | Oct. 19 | General license and unused limited quota licenses, excluding limited quota cow or calf licenses and limited quota archery only licenses, valid for any elk. SEE SECTIONS 5 and 6                                                                                          |
|           |      | Oct. 20         | Nov. 30 | General license and unused limited quota licenses; excluding limited quota archery only licenses, antlerless elk only. SEE SECTIONS 5 and 6                                                                                                                               |
| 78        | 1    | Sept. 26        | Dec. 15 | Limited quota; 25 licenses any elk. SEE SECTION 5                                                                                                                                                                                                                         |
|           | 2    | Sept. 10        | Jan. 31 | Limited quota; 25 licenses antlerless elk. SEE SECTION 5                                                                                                                                                                                                                  |
|           | 6    | Sept. 10        | Jan. 31 | Limited quota; 75 licenses cow or calf. SEE SECTION 5                                                                                                                                                                                                                     |
| 79        | 1    | Oct. 20         | Nov. 15 | Limited quota; 200 licenses any elk. SEE SECTIONS 5 and 6                                                                                                                                                                                                                 |
|           | 2    | Oct. 20         | Nov. 15 | Limited quota; 150 licenses antlerless elk; also valid in Area 75 for antlerless elk. SEE SECTIONS 5 and 6                                                                                                                                                                |
|           | 6    | Oct. 20         | Nov. 15 | Limited quota; 300 licenses cow or calf; also valid in Area 75 for cow or calf. SEE SECTIONS 5 and 6                                                                                                                                                                      |
|           |      | Oct. 20         | Nov. 25 | Unused Area 79 Type 2 and Type 6 licenses valid in Area 75. SEE SECTIONS 5 and 6                                                                                                                                                                                          |
| 80        |      | Sept. 26        | Oct. 31 | General license; any elk. SEE SECTION 5                                                                                                                                                                                                                                   |
|           | 2    | Sept. 10        | Oct. 31 | Limited quota; 75 licenses antlerless elk. SEE SECTION 5                                                                                                                                                                                                                  |
|           |      | Nov. 1          | Nov. 15 | General license and Unused Area 80 Type 2 licenses; valid for antlerless elk. SEE SECTION 5                                                                                                                                                                               |
|           |      | Nov. 16         | Nov. 30 | General licenses and Unused Area 80 Type 2 licenses valid for antlerless elk in that portion of Area 80 south of Flat Creek. SEE SECTION 5                                                                                                                                |
| 81        |      | Sept. 26        | Oct. 25 | General license; any elk, spikes excluded. SEE SECTION 5                                                                                                                                                                                                                  |
|           |      | Oct. 26         | Oct. 31 | General license; antlerless elk. SEE SECTION 5                                                                                                                                                                                                                            |
|           | 2    | Sept. 10        | Oct. 31 | Limited quota; 25 licenses antlerless elk. SEE SECTION 5                                                                                                                                                                                                                  |
| 82        |      | Sept. 26        | Oct. 25 | General license; any elk, spikes excluded. SEE SECTION 5                                                                                                                                                                                                                  |
|           |      | Oct. 26         | Oct. 31 | General license; antlerless elk. SEE SECTION 5                                                                                                                                                                                                                            |
|           | 2    | Sept. 10        | Oct. 31 | Limited quota; 25 licenses antlerless elk. SEE SECTION 5                                                                                                                                                                                                                  |
| 83        |      | Oct. 1          | Oct. 25 | General license; any elk, spikes excluded. SEE SECTION 5                                                                                                                                                                                                                  |
|           |      | Oct. 26         | Oct. 31 | General license; antlerless elk. SEE SECTION 5                                                                                                                                                                                                                            |
|           | 2    | Oct. 1          | Oct. 31 | Limited quota; 25 licenses antlerless elk. SEE SECTION 5                                                                                                                                                                                                                  |
| 84        |      | Sept. 26        | Oct. 31 | General license; any elk. SEE SECTION 5                                                                                                                                                                                                                                   |
|           |      | Nov. 1          | Nov. 11 | General license; antlerless elk. SEE SECTION 5                                                                                                                                                                                                                            |
|           |      | Nov. 12         | Nov. 30 | General license; antlerless elk valid in that portion of Area 84 in the Cache Creek drainage. SEE SECTION 5                                                                                                                                                               |
|           | 1    | Nov. 1          | Jan. 31 | Limited quota; 20 licenses any elk valid only in that portion of Area 84 on private land west of U.S. Highway 191 and north and east of the Snake River starting at the South Park Bridge; access to private land is limited. SEE SECTION 5                               |
|           | 2    | Sept. 10        | Nov. 18 | Limited quota; 50 licenses antlerless elk. SEE SECTION 5                                                                                                                                                                                                                  |
|           | 6    | Sept. 10        | Nov. 18 | Limited quota; 250 licenses cow or calf. SEE SECTION 5                                                                                                                                                                                                                    |

| Hunt Area | Type | Date of Seasons |         | Limitations                                                                                                                                                                                                                                                  |
|-----------|------|-----------------|---------|--------------------------------------------------------------------------------------------------------------------------------------------------------------------------------------------------------------------------------------------------------------|
|           |      | Opens           | Closes  |                                                                                                                                                                                                                                                              |
|           |      | Nov. 19         | Jan. 31 | Unused Area 84 Type 6 licenses valid for cow or calf elk valid in that portion of Area 84 on private land west of U.S. Highway 191 and north and east of the Snake River starting at the South Park Bridge; access to private land is limited. SEE SECTION 5 |
| 85        |      | Sept. 26        | Oct. 31 | General license; any elk. SEE SECTION 5                                                                                                                                                                                                                      |
|           |      | Nov. 1          | Nov. 11 | General license; antlerless elk valid in that portion of Area 85 upstream from Wolf Creek within the Snake River drainage. SEE SECTION 5                                                                                                                     |
|           | 1    | Nov. 1          | Jan. 31 | Limited quota; 20 licenses any elk valid only in that portion of Area 85 on private land north of Butler Creek; access to private land is limited. SEE SECTION 5                                                                                             |
|           | 2    | Sept. 10        | Nov. 18 | Limited quota; 50 licenses antlerless elk. SEE SECTION 5                                                                                                                                                                                                     |
|           | 6    | Sept. 10        | Nov. 18 | Limited quota; 250 licenses cow or calf. SEE SECTION 5                                                                                                                                                                                                       |
|           |      | Nov. 19         | Jan. 31 | Unused Area 85 Type 6 licenses valid for cow or calf elk on private land in that portion of Area 85 north of Butler Creek; access to private land is limited. SEE SECTION 5                                                                                  |
| 86        |      | Sept. 26        | Oct. 31 | General license; any elk. SEE SECTION 5                                                                                                                                                                                                                      |
| 87        |      | Oct. 15         | Oct. 31 | General license; any elk. SEE SECTION 5                                                                                                                                                                                                                      |
|           | 6    | Nov. 19         | Jan. 31 | Limited quota; 50 licenses cow or calf valid in that portion of Area 87 south and east of Dell Creek, north of U.S. Highway 191, and west of the North Fork of Fisherman Creek. SEE SECTION 5                                                                |
| 88        | 1    | Oct. 1          | Oct. 31 | Limited quota; 60 licenses any elk. SEE SECTION 5                                                                                                                                                                                                            |
| 89        |      | Oct. 15         | Oct. 17 | General license; any elk. SEE SECTION 5                                                                                                                                                                                                                      |
|           |      | Oct. 18         | Oct. 31 | General license; antlered elk. SEE SECTION 5                                                                                                                                                                                                                 |
| 90        |      | Oct. 15         | Oct. 31 | General license; any elk. SEE SECTION 5                                                                                                                                                                                                                      |
|           |      | Nov. 1          | Nov. 11 | General license; antlerless elk. SEE SECTION 5                                                                                                                                                                                                               |
|           | 6    | Oct. 15         | Nov. 11 | Limited quota; 100 licenses cow or calf. SEE SECTION 5                                                                                                                                                                                                       |
| 91        |      | Oct. 1          | Oct. 31 | General license; any elk. SEE SECTION 5                                                                                                                                                                                                                      |
|           | 1    | Oct. 1          | Oct. 31 | Limited quota; 350 licenses any elk. SEE SECTION 5                                                                                                                                                                                                           |
|           |      | Nov. 1          | Jan. 31 | Unused Area 91 Type 1 licenses valid for antlerless elk. SEE SECTION 5                                                                                                                                                                                       |
|           | 6    | Oct. 1          | Jan. 31 | Limited quota; 100 licenses cow or calf. SEE SECTION 5                                                                                                                                                                                                       |
| 92        |      | Oct. 15         | Oct. 31 | General license; any elk. SEE SECTION 5                                                                                                                                                                                                                      |
|           |      | Nov. 1          | Nov. 4  | General license; antlerless elk. SEE SECTION 5                                                                                                                                                                                                               |
|           | 6    | Oct. 15         | Nov. 4  | Limited quota; 200 licenses cow or calf. SEE SECTION 5                                                                                                                                                                                                       |
|           |      | Nov. 16         | Jan. 31 | Unused Area 92 Type 6 licenses valid only in that portion of Area 92 east of Sublette County Roads 115, 116 and 117 and south of the North Beaver Road, off national forest lands. SEE SECTION 5                                                             |
| 93        | 1    | Oct. 1          | Oct. 31 | Limited quota; 150 licenses any elk; also valid in that portion of Area 96 west of Wyoming Highway 352. SEE SECTION 5                                                                                                                                        |
|           |      | Nov. 1          | Nov. 15 | Unused Area 93 Type 1 licenses valid for antlerless elk; also valid in that portion of Area 96 west of Wyoming Highway 352. SEE SECTION 5                                                                                                                    |
|           | 2    | Oct. 1          | Nov. 15 | Limited quota; 75 licenses antlerless elk; also valid in that portion of Area 96 west of Wyoming Highway 352. SEE SECTION 5                                                                                                                                  |
|           | 6    | Oct. 1          | Nov. 15 | Limited quota; 225 licenses cow or calf; also valid in that portion of Area 96 west of Wyoming Highway 352. SEE SECTION 5                                                                                                                                    |

| Hunt Area | Type | Date of Seasons |         | Limitations                                                                                                                                                                                                                                                                           |
|-----------|------|-----------------|---------|---------------------------------------------------------------------------------------------------------------------------------------------------------------------------------------------------------------------------------------------------------------------------------------|
|           |      | Opens           | Closes  |                                                                                                                                                                                                                                                                                       |
| 94        |      | Oct. 15         | Oct. 31 | General license; any elk. SEE SECTION 5                                                                                                                                                                                                                                               |
|           |      | Nov. 1          | Nov. 4  | General license; antlerless elk. SEE SECTION 5                                                                                                                                                                                                                                        |
|           | 1    | Oct. 15         | Oct. 21 | Limited quota; 50 licenses any elk. SEE SECTION 5                                                                                                                                                                                                                                     |
|           |      | Oct. 22         | Nov. 4  | Unused Area 94 Type 1 licenses valid for antlerless elk. SEE SECTION 5                                                                                                                                                                                                                |
|           | 6    | Oct. 15         | Nov. 4  | Limited quota; 300 licenses cow or calf. SEE SECTION 5                                                                                                                                                                                                                                |
|           |      | Nov. 16         | Jan. 31 | Unused Area 94 Type 1 and Type 6 licenses; 100 access permits will be issued for antlerless elk only on those lands enrolled in the Big Piney Hunter Management Area in Hunt Areas 92 and 94. Access permits will be issued at the Pinedale Regional Office on Nov. 10. SEE SECTION 5 |
| 95        | 1    | Oct. 15         | Nov. 5  | Limited quota; 150 licenses any elk. SEE SECTION 5                                                                                                                                                                                                                                    |
|           | 2    | Oct. 15         | Nov. 5  | Limited quota; 250 licenses antlerless elk. SEE SECTION 5                                                                                                                                                                                                                             |
|           | 3    | Oct. 1          | Nov. 5  | Limited quota; 25 licenses any elk valid in that portion of Area 95 that is within the Green River Drainage upstream from the outlet of Lower Green River Lake, including that portion east and south of Mill Creek. SEE SECTION 5                                                    |
|           | 4    | Oct. 1          | Nov. 5  | Limited quota; 25 licenses antlerless elk valid in that portion of Area 95 that is within the Green River Drainage upstream from the outlet of Lower Green River Lake, including that portion east and south of Mill Creek. SEE SECTION 5                                             |
|           | 6    | Oct. 15         | Nov. 5  | Limited quota; 25 licenses cow or calf. SEE SECTION 5                                                                                                                                                                                                                                 |
|           |      | Oct. 15         | Oct. 31 | General license; any elk. SEE SECTION 5                                                                                                                                                                                                                                               |
| 96        | 1    | Oct. 1          | Oct. 31 | Limited quota; 200 licenses any elk. SEE SECTION 5                                                                                                                                                                                                                                    |
|           | 2    | Oct. 1          | Oct. 31 | Limited quota; 50 licenses antlerless elk. SEE SECTION 5                                                                                                                                                                                                                              |
|           | 6    | Oct. 1          | Oct. 31 | Limited quota; 75 licenses cow or calf. SEE SECTION 5                                                                                                                                                                                                                                 |
|           |      | Nov. 1          | Nov. 15 | Unused Area 96 Type 1, 2, and 6 licenses antlerless elk. SEE SECTION 5                                                                                                                                                                                                                |
|           |      | Oct. 1          | Oct. 31 | General license; any elk. SEE SECTION 5                                                                                                                                                                                                                                               |
| 97        | 1    | Sept. 20        | Oct. 31 | Limited quota; 300 licenses any elk. SEE SECTION 5                                                                                                                                                                                                                                    |
|           |      | Nov. 1          | Nov. 6  | Unused Area 97 Type 1 licenses valid for antlerless elk. SEE SECTION 5                                                                                                                                                                                                                |
|           | 2    | Sept. 20        | Nov. 6  | Limited quota; 50 licenses antlerless elk. SEE SECTION 5                                                                                                                                                                                                                              |
|           | 6    | Sept. 20        | Nov. 6  | Limited quota; 75 licenses cow or calf. SEE SECTION 5                                                                                                                                                                                                                                 |
|           |      | Oct. 1          | Oct. 31 | General license; any elk. SEE SECTION 5                                                                                                                                                                                                                                               |
| 98        | 1    | Sept. 20        | Oct. 31 | Limited quota; 350 licenses any elk. SEE SECTION 5                                                                                                                                                                                                                                    |
|           |      | Nov. 1          | Nov. 15 | Unused Area 98 Type 1 licenses valid for antlerless elk. SEE SECTION 5                                                                                                                                                                                                                |
|           | 2    | Sept. 20        | Nov. 15 | Limited quota; 100 licenses antlerless elk. SEE SECTION 5                                                                                                                                                                                                                             |
|           | 6    | Sept. 20        | Nov. 15 | Limited quota; 150 licenses cow or calf. SEE SECTION 5                                                                                                                                                                                                                                |
|           |      | Nov. 16         | Dec. 31 | Unused Area 98 Type 1, Type 2 and Type 6 licenses valid for antlerless elk in that portion of Area 98 between Scab Creek and the East Fork River drainage, excluding Irish Canyon Creek and Muddy Creek. SEE SECTION 5                                                                |
|           |      | Oct. 1          | Oct. 31 | General license; any elk. SEE SECTION 5                                                                                                                                                                                                                                               |
| 99        | 1    | Oct. 1          | Oct. 31 | Limited quota; 175 licenses antlered elk                                                                                                                                                                                                                                              |
|           | 2    | Oct. 1          | Nov. 15 | Limited quota; 225 licenses antlerless elk                                                                                                                                                                                                                                            |
| 100       | 1    | Oct. 15         | Oct. 31 | Limited quota; 225 licenses antlered elk                                                                                                                                                                                                                                              |
|           | 2    | Oct. 20         | Nov. 11 | Limited quota; 200 licenses antlerless elk                                                                                                                                                                                                                                            |
| 102       |      | Oct. 15         | Oct. 24 | General license; any elk                                                                                                                                                                                                                                                              |
|           |      | Oct. 25         | Nov. 4  | General license; antlerless elk                                                                                                                                                                                                                                                       |

| Hunt Area | Type | Date of Seasons |         | Limitations                                                                                                                                         |
|-----------|------|-----------------|---------|-----------------------------------------------------------------------------------------------------------------------------------------------------|
|           |      | Opens           | Closes  |                                                                                                                                                     |
| 103       |      | Oct. 15         | Oct. 24 | General license; any elk                                                                                                                            |
|           |      | Oct. 25         | Nov. 4  | General license; antlerless elk                                                                                                                     |
|           | 6    | Dec. 15         | Jan. 31 | Limited quota; 50 licenses cow or calf                                                                                                              |
| 104       |      | Oct. 15         | Oct. 24 | General license; any elk                                                                                                                            |
|           |      | Oct. 25         | Nov. 4  | General license; antlerless elk                                                                                                                     |
|           | 6    | Oct. 10         | Oct. 14 | Limited quota; 150 licenses cow or calf valid in that portion of Area 104 west of U. S. Highway 30                                                  |
|           |      | Oct. 15         | Nov. 4  | Unused Area 104 Type 6 licenses cow or calf valid in the entire area                                                                                |
| 105       |      | Oct. 15         | Oct. 31 | General license; any elk                                                                                                                            |
| 106       |      | Oct. 15         | Oct. 31 | General license; any elk                                                                                                                            |
|           | 1    | Nov. 15         | Dec. 31 | Limited quota; 30 licenses any elk valid in that portion of Area 106 west of Muddy Creek, or north of Wyoming Highway 410 and Uinta County Road 204 |
|           | 2    | Nov. 15         | Dec. 31 | Limited quota; 150 licenses antlerless elk                                                                                                          |
|           | 6    | Sept. 10        | Oct. 31 | Limited quota; 25 licenses cow or calf valid east of Wyoming Highway 150 and north and west of Uinta County Road 173                                |
|           |      | Nov. 15         | Dec. 31 | Unused Area 106 Type 6 licenses cow or calf valid in the entire area                                                                                |
| 107       |      | Oct. 15         | Oct. 31 | General license; any elk                                                                                                                            |
|           | 2    | Nov. 15         | Dec. 31 | Limited quota; 100 licenses antlerless elk                                                                                                          |
|           |      | Jan. 1          | Jan. 31 | Unused Area 107 Type 2 licenses antlerless elk off national forest                                                                                  |
| 108       | 1    | Oct. 11         | Oct. 31 | Limited quota; 50 licenses any elk                                                                                                                  |
|           | 2    | Oct. 11         | Nov. 20 | Limited quota; 100 licenses antlerless elk                                                                                                          |
|           | 3    | Nov. 1          | Nov. 20 | Limited quota; 50 licenses antlerless elk                                                                                                           |
| 110       |      | Oct. 15         | Oct. 31 | General license; any elk                                                                                                                            |
|           | 2    | Oct. 15         | Nov. 5  | Limited quota; 75 licenses antlerless elk                                                                                                           |
| 111       | 1    | Oct. 10         | Oct. 31 | Limited quota; 40 licenses antlered elk                                                                                                             |
|           | 2    | Oct. 10         | Nov. 20 | Limited quota; 90 licenses antlerless elk                                                                                                           |
|           | 3    | Oct. 22         | Nov. 20 | Limited quota; 60 licenses antlerless elk                                                                                                           |
| 113       | 1    | Nov. 5          | Nov. 30 | Limited quota; 40 licenses any elk                                                                                                                  |
|           | 2    | Nov. 5          | Nov. 30 | Limited quota; 60 licenses antlerless elk                                                                                                           |
| 114       | 1    | Oct. 1          | Oct. 31 | Limited quota; 50 licenses any elk                                                                                                                  |
|           | 2    | Oct. 1          | Nov. 14 | Limited quota; 50 licenses antlerless elk; also valid in Area 125 north of Interstate Highway 80                                                    |
|           | 6    | Oct. 1          | Nov. 14 | Limited quota; 50 licenses cow or calf; also valid in Area 125 north of Interstate Highway 80                                                       |
| 116       | 1    | Oct. 15         | Dec. 15 | Limited quota; 175 licenses any elk                                                                                                                 |
|           | 2    | Oct. 15         | Dec. 15 | Limited quota; 150 licenses antlerless elk                                                                                                          |
|           | 6    | Oct. 15         | Dec. 15 | Limited quota; 100 licenses cow or calf                                                                                                             |
| 117       | 1    | Oct. 15         | Nov. 30 | Limited quota; 225 licenses any elk                                                                                                                 |
|           | 2    | Oct. 15         | Nov. 30 | Limited quota; 175 licenses antlerless elk                                                                                                          |
|           | 6    | Oct. 15         | Nov. 30 | Limited quota; 60 licenses cow or calf                                                                                                              |
|           |      | Dec. 1          | Dec. 15 | Unused Area 117 Type 1, Type 2 and Type 6 licenses valid for antlerless elk on private land                                                         |
| 118       | 1    | Oct. 23         | Nov. 4  | Limited quota; 25 licenses antlered elk                                                                                                             |
|           | 2    | Oct. 23         | Nov. 4  | Limited quota; 35 licenses antlerless elk                                                                                                           |
|           | 6    | Oct. 1          | Nov. 30 | Limited quota; 35 licenses cow or calf valid in that portion of Area 118 south and east of Separation Creek                                         |

| Hunt Area | Type | Date of Seasons |          | Limitations                                                               |
|-----------|------|-----------------|----------|---------------------------------------------------------------------------|
|           |      | Opens           | Closes   |                                                                           |
| 120       | 1    | Oct. 9          | Oct. 31  | Limited quota; 100 licenses any elk                                       |
|           |      | Nov. 1          | Nov. 30  | Unused Area 120 Type 1 licenses valid for antlerless elk                  |
|           | 2    | Oct. 9          | Nov. 30  | Limited quota; 100 licenses antlerless elk                                |
|           | 3    | Nov. 1          | Nov. 30  | Limited quota; 75 licenses antlerless elk                                 |
| 121       | 1    | Nov. 1          | Nov. 30  | Limited quota; 100 licenses any elk; also valid in Area 65                |
|           | 2    | Nov. 1          | Dec. 31  | Limited quota; 125 licenses antlerless elk; also valid in Areas 54 and 65 |
|           | 3    | Oct. 1          | Oct. 21  | Limited quota; 50 licenses antlerless elk                                 |
|           | 6    | Nov. 1          | Dec. 31  | Limited quota; 100 licenses cow or calf; also valid in Areas 54 and 65    |
| 122       | 1    | Oct. 20         | Nov. 19  | Limited quota; 50 licenses any elk                                        |
|           |      | Nov. 20         | Nov. 30  | Unused Area 122 Type 1 licenses valid for antlerless elk                  |
|           | 2    | Oct. 20         | Nov. 30  | Limited quota; 25 licenses antlerless elk                                 |
|           | 6    | Oct. 20         | Nov. 30  | Limited quota; 75 licenses cow or calf                                    |
| 123       | 2    | Sept. 8         | Sept. 16 | Limited quota; 100 licenses antlerless elk                                |
|           |      | Nov. 5          | Nov. 14  | Unused Area 123 Type 2 licenses antlerless elk                            |
| 124       | 1    | Oct. 15         | Nov. 30  | Limited quota; 15 licenses any elk                                        |
|           | 2    | Oct. 15         | Nov. 30  | Limited quota; 60 licenses antlerless elk                                 |
| *125      | 1    | Oct. 1          | Nov. 6   | Limited quota; 150 licenses any elk                                       |
|           |      | Nov. 7          | Dec. 31  | Unused Area 125 Type 1 licenses valid for antlerless elk                  |
|           | 2    | Oct. 1          | Dec. 31  | Limited quota; 50 licenses antlerless elk                                 |
|           | 6    | Oct. 1          | Dec. 31  | Limited quota; 75 licenses cow or calf                                    |
| 126       | 1    | Nov. 5          | Dec. 10  | Limited quota; 25 licenses any elk                                        |
|           | 2    | Nov. 5          | Dec. 10  | Limited quota; 35 licenses antlerless elk                                 |
| 127       |      | Oct. 15         | Oct. 31  | General license; any elk                                                  |
| 128       |      | Oct. 1          | Oct. 14  | General license; any elk                                                  |
|           | 6    | Nov. 1          | Nov. 30  | Limited quota; 25 licenses cow or calf                                    |
| 129       |      | Sept. 1         | Nov. 30  | General license; any elk                                                  |
|           | 6    | Sept. 1         | Nov. 30  | Limited quota; 100 licenses cow or calf                                   |
| 130       |      | Oct. 1          | Oct. 22  | General license, any elk                                                  |

\*ASTERISK DENOTES A CWD HUNT AREA. PLEASE SEE IMPORTANT INFORMATION SECTION OF THE ELK REGULATION BROCHURE REGARDING CHRONIC WASTING DISEASE.

Section 4. Special Archery Seasons. Hunt Areas listed in this section shall have special archery hunting seasons during the dates specified in this section. Archers shall possess a general elk license or a limited quota elk license in addition to an archery license in order to hunt elk during any special archery season.

Archers with general elk licenses shall only hunt in those Hunt Areas specified in Section 3 as open to hunting with a general license and may take any elk, unless specified as antlerless elk in Section 3.

Archers with limited quota elk licenses may only hunt in the Hunt Area specified in Section 3 for which their license is valid. They shall only hunt the sex of elk allowed to be taken within the Hunt Area on the earliest opening date for which their license type is valid as specified in Section 3. Archers with limited quota Type 9 elk licenses are not required to obtain an archery license in addition to the Type 9 license.

| Hunt Area                                                                                                                      | Date of Seasons |          |
|--------------------------------------------------------------------------------------------------------------------------------|-----------------|----------|
|                                                                                                                                | Opens           | Closes   |
| 1, 5-16, 19, 21-25, 27, 28, 30-34, 47-56, 58, 59, 61-65, 83, 87-96, 99, 100, 102-111, 113, 114, 116-118, 120-122, 124-128, 130 | Sept. 1         | Sept. 30 |
| 3                                                                                                                              | Sept. 1         | Sept. 14 |
| 35-37, 41, 42, 45, 46, 67-69                                                                                                   | Sept. 15        | Sept. 30 |
| 60, 66                                                                                                                         | Sept. 1         | Sept. 9  |
| 70, 71, 73, 97, 98                                                                                                             | Sept. 1         | Sept. 19 |
| 74, 78, 80-82, 84-86                                                                                                           | Sept. 1         | Sept. 25 |

Section 5. Elk Feedground Special Management Permit (Fee \$10.50). The Department's elk feedground program is a special management program that requires additional expenditures for the feeding of wildlife. An elk feedground special management permit shall be required of any person who hunts elk in elk hunt areas listed in subsection (a) of this section. The elk feedground special management permit shall be in possession of any person while hunting elk in those hunt areas and shall be immediately produced upon request from an authorized Department representative. Any person who purchases an elk feedground special management permit for the purpose set forth in this section shall sign his or her name in ink across the face of the permit. The permit shall cost ten dollars and fifty cents (\$10.50) and shall be available at Cheyenne Headquarters, Department Regional Offices, and at designated license selling agents.

(a) Elk Hunt Areas 70, 71, 74, 75, 77, 78, 79, 80, 81, 82, 83, 84, 85, 86, 87, 88, 89, 90, 91, 92, 93, 94, 95, 96, 97, and 98.

Section 6. Regulations Governing Elk Hunting In Grand Teton National Park (Hunt Areas 75 and 79) and the National Elk Refuge (Hunt Area 77).

(a) NO HUNTER MAY HARVEST MORE THAN ONE (1) ELK IN GRAND TETON NATIONAL PARK.

(b) Successful completion of a hunter safety course is required, regardless of a hunter's age, prior to hunting in Grand Teton National Park or the National Elk Refuge and a hunter safety certificate shall be in possession when hunting elk.

(c) A Park or National Elk Refuge Permit is required prior to hunting elk and shall be in possession while hunting elk in Grand Teton National Park or the National Elk Refuge.

(d) That portion of Hunt Area 75 beginning at the Lost Creek Road (U.S.F.S. Road 30340) at U.S. Highway 26-89-191; easterly along said road to the Grand Teton National Park boundary; southerly along said boundary to the intersection with the Shadow Mountain-Kelly Road (U.S.F.S. Road 30340) at Carpenter Draw; southwesterly along said road to the junction of the Mormon Row Road; northerly along said road to the Antelope Flats Road; westerly along said road to U.S. Highway 26-89-191; northeasterly along said highway to the Lost Creek Road (U.S.F.S. Road 30340), described as the Antelope Flats and the hayfields areas shall be open only to antlerless elk hunting.

(e) An area one-quarter (1/4) mile wide along either side of U.S. Highway 26-89-191 shall be closed to all elk hunting within Grand Teton National Park.

(f) An area within one-half (1/2) mile of any building shall be closed to elk hunting within Grand Teton National Park.

(g) A portion of Hunt Area 75 in the SW 1/4 of Section 22, T43N, R115W, S1/2, S1/2 of Sections 3 and 4, T42N, R115W shall be closed to elk hunting, as posted in the field.

(h) Legal firearms include rifles with a barrel bore diameter of at least .23 caliber that fire a cartridge that is two (2) inches or more in length. Handguns and archery hunting are prohibited in Grand Teton National Park and the National Elk Refuge.

#### Section 7. Hunt Area Descriptions.

##### (a) Area and Number.

Area 1. Black Hills. Beginning where the north boundary of the Black Hills National Forest crosses the Wyoming-South Dakota state line; southerly along said line to U.S.F.S. Road 807; northwesterly along said road to Moskee; northerly along the Moskee Road to its junction with U.S.F.S. Road 863; northerly along said road to the Black Hills National Forest boundary marker and one-quarter mile south of Ranch A; easterly along said boundary to the Wyoming-South Dakota state line.

Area 2. Fortification. Beginning where the Wild Horse Road (Sheridan County Road 38) crosses the Powder River at Arvada; easterly along said road to the Echeta Road (Sheridan County Road 293); southeasterly along said road to the Montgomery Road; westerly along said road to the Kingsbury Road; southerly along said road to Interstate Highway 90; westerly along said highway to the Powder River; northerly down said river to the Wild Horse Road (Sheridan County Road 38).

Area 3. Rawhide. Beginning at the intersection of U.S. Highway 20 and U.S. Highway 85 in the town of Lusk; easterly along U.S. Highway 20 to the Wyoming-Nebraska state line; southerly along said line to Wyoming State Highway 151; westerly along said highway to U.S. Highway 85; northerly along said highway to Wyoming State Highway 313; westerly along said highway to the town of Chugwater and Interstate Highway 25; northerly along said highway to U.S. Highway 26; easterly along said highway to the North Platte River; northerly and westerly up said river to Interstate Highway 25; northerly along said Interstate to U.S. Highway 20; easterly along said highway to the intersection of U.S. Highway 20 and U.S. Highway 85 in the town of Lusk.

Area 5. Iron Mountain. Beginning at the city of Laramie and U.S. Highway 30-287; northerly along said highway to Wyoming Highway 34; northerly and easterly along said highway to Interstate Highway 25; southerly along said highway to Wyoming Highway 211; southwesterly along said highway to the Fisher Canyon-Rogers Canyon Road (Laramie County Road 228-Albany County Road 17); westerly and southerly along said road to U.S. Highway 30-287.

Area 6. Pole Mountain. Beginning where Interstate Highway 25 crosses the Wyoming-Colorado state line; westerly along said line to U.S. Highway 287; northerly along said highway to the Rogers Canyon-Fisher Canyon Road (Albany County Road 17-Laramie County Road 228); northeasterly along said road to Wyoming Highway 211; southeasterly along said highway to Interstate Highway 25; southerly along said highway to the Wyoming-Colorado state line.

Area 7. Laramie Peak. Beginning at the confluence of Deer Creek and the North Platte River in the town of Glenrock; easterly and southerly down said river to the town of Guernsey and U.S. Highway 26; westerly along said highway to Interstate Highway 25; southerly along said highway to Wyoming Highway 34; southwesterly along said highway to U.S. Highway 30-287; northerly along said highway to Wyoming Highway 487 at the town of Medicine Bow; northerly along said highway to the Little Medicine Bow River; northerly up said river to the Little Medicine Road (Carbon County Road 99); northeasterly along said road to the Shirley Ridge Road (Carbon County Road 2); northerly and easterly along said road to Wyoming Highway 487; northerly and westerly along said highway to the divide between Spring Creek and Bates Creek; easterly along said divide to the Bates Creek Road (Natrona County Road 402); easterly along said road to the Squaw Springs Trail Road; northeasterly along said road to U.S.F.S. Road 660; easterly along said road to Curry Creek; northwesterly down said creek to Deer Creek; northerly down said creek to the Stephens Road (Converse County Road 20); northerly along said road to the Deer Creek Road (Converse County Road 19); northerly along said road to Wyoming Highway 20-26 in the town of Glenrock; easterly along said highway to Deer Creek; northerly down said creek to the North Platte River.

Area 8. Boulder Ridge. Beginning at the city of Laramie and U.S. Highway 287; southerly along said highway to the Wyoming-Colorado state line; westerly along said line to Wyoming Highway 10; northerly along

said highway to Wyoming Highway 230 at Woods Landing; northeasterly along said highway to U.S. Highway 287 at the city of Laramie.

Area 9. South Snowy Range. Beginning at the city of Laramie and Wyoming Highway 230; southwesterly along said highway to Woods Landing and Wyoming Highway 10; southerly along said highway to the Wyoming-Colorado state line; westerly along said line to Wyoming Highway 230; northeasterly along said highway to U.S.F.S. Road 512; northwesterly along said road to U.S.F.S. Road 543; northerly along said road to Douglas Creek at Keystone; northerly up said creek to the divide between the Laramie River and the North Platte River; northerly along said divide to Wyoming Highway 130; easterly along said highway to Wyoming Highway 230.

Area 10. Rock Creek. Beginning at the city of Laramie and Wyoming Highway 130; westerly along said highway to the divide between the Laramie River and the North Platte River; northerly along said divide to the divide between the Medicine Bow River and the Laramie River at Medicine Bow Peak; northeasterly along said divide to Sheep Lake Trail 389; northwesterly along said trail to Deep Creek; northeasterly down said creek to Rock Creek; northeasterly down said creek to Interstate Highway 80 at Arlington; southeasterly along said highway to Wyoming Highway 130.

Area 11. Medicine Bow River. Beginning where Interstate Highway 80 crosses Rock Creek at Arlington; southwesterly up said creek to Deep Creek; southwesterly up said creek to Sheep Lake Trail 389; southeasterly along said trail to the divide between the Laramie River and the Medicine Bow River; southwesterly along said divide to Medicine Bow Peak and the divide between the Medicine Bow River and Brush Creek; northwesterly along said divide to U.S.F.S. Road 103; northwesterly along said road to the North Brush Creek Road (U.S.F.S. Road 100); northerly along said road to the Sand Lake Road (U.S.F.S. Road 101); northwesterly along said road to the Cedar Pass Road (U.S.F.S. Road 261); southwesterly along said road to U.S.F.S. Road 115; northerly along said road to the Pass Creek Basin Road; northerly along said road to the Pass Creek Road (Carbon County Road 404); northerly along said road to Wyoming Highway 72; northwesterly along said highway to Interstate Highway 80 at the west Elk Mountain interchange; southeasterly along said highway to Rock Creek.

Area 12. Kennaday Peak. Beginning at the junction of the North Platte River and Interstate Highway 80 at Fort Steele Bridge; easterly along said highway to Wyoming Highway 130 at the Saratoga interchange; southerly along said highway to the Pass Creek Road (Carbon County Road 404); easterly along said road to the Pass Creek Basin Road; southerly along said road to U.S.F.S. Road 115; southerly along said road to the Cedar Pass Road (U.S.F.S. Road 261); northeasterly along said road to the Sand Lake Road (U.S.F.S. Road 101); southeasterly along said road to the North Brush Creek Road (U.S.F.S. Road 100); southerly along said road to U.S.F.S. Road 103; southeasterly along said road to the divide between Brush Creek and the Medicine Bow River; southeasterly along said divide to Medicine Bow Peak and the Laramie River-North Platte River divide; southerly along said divide to Wyoming Highway 130; westerly and northerly along said highway to the North Platte River at Saratoga; northwesterly down said river to Interstate Highway 80.

Area 13. Big Creek. Beginning where the Continental Divide crosses the Wyoming-Colorado state line; northerly along said divide to the Encampment-Savery Road (Wyoming Highway 70); easterly along said road to Wyoming Highway 230; easterly along said highway to the Blackhall Mountain Road (U.S.F.S. Road 409); southerly along said road to the Blackhall Lookout Station; southerly along the divide between Big Creek and the Encampment River to the Wyoming-Colorado state line; westerly along said line to the Continental Divide.

Area 15. Spring Creek. Beginning where Wyoming Highway 71 (Rawlins-Sandstone Road) crosses the Continental Divide; northerly along said highway to Sage Creek; easterly down said creek to the North Platte River; southerly up said river to Wyoming Highway 130; southerly along said highway to Wyoming Highway 230; southeasterly along said highway to Wyoming Highway 70; westerly along said highway to the Continental Divide; northerly along said divide to Wyoming Highway 71.

Area 16. Shirley Mountain. Beginning at the junction of Interstate Highway 80 and the North Platte River; northeasterly down said river to Wyoming Highway 220 at Government Bridge; northeasterly along said highway to the Bolton Creek Road (Natrona County Road 404); southeasterly along said road to the Bates Hole Stock Trail (Natrona County Road 403); southeasterly along said road to Wyoming Highway 487; southerly along



said highway to the Shirley Ridge Road (Carbon County Road 2); easterly and southerly along said road to the Little Medicine Road (Carbon County Road 99); southwesterly along said road to the Little Medicine Bow River; southerly along said river to Wyoming Highway 487; southerly along said highway to U.S. Highway 30; southwesterly along said highway to Interstate Highway 80; westerly along said interstate to the North Platte River.

Area 19. Muddy Mountain. Beginning where Wyoming Highway 95 crosses the North Platte River; easterly down said river to Deer Creek; southerly up said creek to Wyoming Highway 20-26 in the town of Glenrock; westerly along said highway to the Deer Creek road (Converse County Road 19); southerly along said road to the Stephens Road (Converse County Road 20); southerly along said road to Deer Creek; southerly up said creek to Curry Creek; southeasterly up said creek to U.S.F.S. Road 660; westerly along said road to the Squaw Springs Trail Road; southwesterly along said road to the Bates Creek Road (Natrona County Road 402); southwesterly along said road to the divide between Spring Creek and the Bates Creek drainage; westerly along said divide to Wyoming Highway 487; northwesterly along said highway to the Bates Hole Stock Trail (Natrona County Road 403); northwesterly along said road to the Bolton Creek Road (Natrona County Road 404); northwesterly along said road to Wyoming Highway 220; southwesterly along said highway to the North Platte River at Government Bridge; easterly down said river to Wyoming Highway 95.

Area 21. Baggs. Beginning at the junction of Wyoming Highway 789 and the Wyoming-Colorado state line; northerly along said highway to Muddy Creek north of Dad; easterly up said creek to the Muddy Creek Road (BLM Road 3306); easterly along said road to Miller Hill Road (BLM Road 3328); southeasterly along said road to the McCarty Canyon Road (Carbon County Road 503); northeasterly along said road to the Rawlins City Water Works Road; northerly along said road to Sage Creek below Sage Creek Reservoir; northeasterly down said creek to the Sage Creek Road (Carbon County Road 401); southerly along said road to the Continental Divide at Middlewood Hill; southerly along said divide to the Wyoming-Colorado state line; westerly along said line to Wyoming Highway 789.

Area 22. Ferris. Beginning where Wyoming Highway 287 intersects Wyoming Highway 220 at Muddy Gap Junction; northeasterly along Wyoming Highway 220 to the Buzzard Road (Natrona County Road 410-Carbon County Road 497); southerly along said road to the South Ferris Road (Carbon County Road 100); westerly along said road to U.S. Highway 287; northerly along said highway to Muddy Gap Junction.

Area 23. Rattlesnake. Beginning where Wyoming Highway 220 intersects the Dry Creek Road (Natrona County Road 321); northwesterly along said road to the Gas Hills Road (Natrona County Road 212); northeasterly along said road to U.S. Highway 20-26 at the town of Waltman; easterly along said highway to the North Platte River at the city of Casper; southwesterly up said river to the Kortess Road (Natrona County Road 407); northerly along said road to Wyoming Highway 220; westerly along said highway to the Dry Creek Road.

Area 24. Green Mountain. Beginning where Wyoming Highway 287 intersects Wyoming Highway 220 at Muddy Gap Junction; southerly along U.S. Highway 287 to the town of Lamont; westerly along Wyoming Highway 73 to the Bairoil Road (Sweetwater County Road 22); westerly along said road to the Wamsutter-Crooks Gap Road (Sweetwater County Road 23); northerly along said road to the Three Forks-Atlantic City Road (BLM Road 2317); westerly along said road to the Bison Basin Road (BLM Road 3221); northerly along said road to U.S. Highway 287; easterly along said highway to Muddy Gap Junction.

Area 25. South Pass. Beginning where U.S. Highway 287 crosses the south boundary of the Wind River Indian Reservation at the North Popo Agie River; easterly along said boundary to Wyoming Highway 135 (Sand Draw Road); southerly along said highway to U.S. Highway 287 at Sweetwater Station; easterly along said highway to the Bison Basin Road (Fremont County and BLM Road 3221); southerly along said road to the Atlantic City/Three Forks Road (BLM Road 2317); westerly along said road to the Sweetwater River at Phelps-Dodge Bridge; southwesterly up said river to Wyoming Highway 28; northeasterly up said highway to its junction with U.S. Highway 287; northerly along said highway to the south boundary of the Wind River Indian Reservation.

Area 27. Upper Sweetwater. Beginning where Wyoming Highway 28 crosses the Sweetwater River; northwesterly and northerly up said river to the divide between the Sweetwater River and the Wind River at Sweetwater Gap; southeasterly along said divide to Granite Peak and the head of Willow Creek; southeasterly down said creek to Wyoming Highway 28; southwesterly along said highway to the Sweetwater River.

Area 28. Cony Mountain. Beginning where U.S. Highway 287 intersects the southern Wind River Indian Reservation boundary; southeasterly along said highway to Wyoming Highway 28; southwesterly along said highway to Willow Creek; northwesterly up said creek to the divide between the Sweetwater River and Wind River drainages at Granite Peak; northwesterly along said divide to the Continental Divide; northwesterly along said divide to the southern boundary of the Wind River Indian Reservation; easterly along said boundary to U.S. Highway 287.

Area 30. Aspen Mountain. Beginning where Interstate Highway 80 crosses the Green River; easterly along said highway to the town of Rock Springs and Wyoming Highway 430; southeasterly along said highway to the Mud Springs Road (Sweetwater County Road 32); southwesterly along said road to Aspen Mountain Road (Sweetwater County Road 27); southerly along said road to Clay Basin Pipeline Road (Sweetwater County Road 71); southwesterly along said road to the Ramsey Ranch Road (Sweetwater County Road 34); westerly along said road to U.S. Highway 191; westerly along said highway to the Ramsey Ranch Road (Sweetwater County Road 34); northerly along said road to Sage Creek Road (Sweetwater County Road 36); westerly along said road to Sage Creek; westerly down said creek to Flaming Gorge Reservoir; northerly along the east shore of said reservoir to the Green River; northeasterly then northwesterly up said river to Interstate Highway 80.

Area 31. Little Mountain. Beginning where the east shore of Flaming Gorge Reservoir crosses the Wyoming-Utah state line; northerly along the east shore of Flaming Gorge Reservoir to its confluence with Sage Creek; easterly up said creek to the Sage Creek Road (Sweetwater County Road 36); easterly along said road to the Ramsey Ranch Road (Sweetwater County Road 34); southerly along said road to U.S. Highway 191; southerly along said highway to the Wyoming-Utah state line; westerly along said line to the east shore of Flaming Gorge Reservoir.

Area 32. Pine Mountain. Beginning where Wyoming Highway 430 crosses the Wyoming-Colorado state line; westerly along said line to the Wyoming-Utah state line; westerly along said line to U.S. Highway 191; northerly along said highway to the Ramsey Ranch Road (Sweetwater County Road 34); easterly along said road to the Clay Basin Pipeline Road (Sweetwater County Road 71); northeasterly along said road to the Aspen Mountain Road (Sweetwater County Road 27); northerly along said road to the Mud Springs Road (Sweetwater County Road 32); northeasterly long said road to Wyoming Highway 430; southerly along said highway to the Wyoming-Colorado state line.

Area 33. Middle Fork. Beginning at the Kaycee interchange on Interstate Highway 25; southeasterly along said highway to the Midwest interchange and the Smoky Gap Road (Natrona County Road 115); westerly along said road to the Dead Horse Road (Natrona County Road 114); southwesterly along said road to the Wild Horse Trail Road (Natrona County Road 113); westerly along said road to the 33 Mile Road (Natrona County Road 110); northwesterly along said road to the Hazelton Road (Washakie County Road 81); northerly along said road to the Barnum Mountain Road; easterly along said road to the Barnum Road (Johnson County Road 78) at the town of Barnum; easterly along said road to Wyoming Highway 190; northeasterly along said road to Wyoming Highway 191; easterly along said highway to Interstate Highway 25.

Area 34. Upper Powder River. Beginning at the junction of Wyoming Highway 196 and the Crazy Woman Canyon Road (Johnson County Road 14); southerly along said highway to Wyoming Highway 191 at the town of Kaycee; westerly along said highway to Wyoming Highway 190; westerly along said highway to the town of Barnum and the Barnum Mountain Road; westerly along said road to the Hazelton Road (Washakie County Road 81-Johnson County Road 3); northerly along said road to the Gold Mine Road (U.S.F.S. Road 452); northerly along said road to the Canyon Creek Road (U.S.F.S. Road 25); northerly along said road to U.S. Highway 16; easterly along said highway to the Crazy Woman Canyon Road; easterly along said road to Wyoming Highway 196.

Area 35. Hunter Mesa. Beginning where U.S. Highway 87 business loop crosses French Creek; southerly along said highway to Wyoming Highway 196; southerly along said highway to the Crazy Woman Canyon Road (Johnson County Road 14); westerly along said road to U.S. Highway 16; westerly along said highway to the divide along the Big Horn Mountain range at Powder River Pass; northwesterly along said divide to North Clear Creek; easterly down said creek to the North Fork Ditch; easterly down said ditch to French Creek; easterly down said creek to the U.S. Highway 87 business loop.

Area 36. Rock Creek. Beginning where Interstate Highway 90 crosses Piney Creek; southeasterly along said highway to Interstate Highway 25; southerly along said highway to French Creek east of the town of Buffalo; westerly up said creek to the North Fork Ditch; westerly up said ditch to the North Fork of Clear Creek; westerly up said creek to the divide along the Big Horn Mountain range; northerly along said divide to South Piney Creek; northeasterly down said creek to Piney Creek; easterly down said creek to Interstate Highway 90.

Area 37. Goose. Beginning at the junction of U.S. Highway 14 and Interstate Highway 90 east of the town of Ranchester; southerly along said highway to Piney Creek; westerly up said creek to South Piney Creek; southwesterly up said creek to the divide along the Big Horn Mountain range; northwesterly along said divide to the Woodchuck Pass Road (U.S.F.S. Road 226); northerly along said road to the Goose (Red Grade) Road (U.S.F.S. Road 26); northwesterly along said road to the Black Mountain Road (U.S.F.S. Road 16); northeasterly along said road to U.S. Highway 14; easterly along said road to Interstate Highway 90.

Area 38. Tongue. Beginning where Interstate Highway 90 crosses the Wyoming-Montana state line; southeasterly along said highway to U.S. Highway 14; westerly along said highway to the Black Mountain Road (U.S.F.S. Road 16); southerly along said road to the Goose (Red Grade) Road (U.S.F.S. Road 26); southerly along said road to the Woodchuck Pass Road (U.S.F.S. Road 226); southerly along said road to Woodchuck Pass and the divide along the Big Horn Mountain range; northwesterly along said divide to U. S. Highway 14 at Granite Pass; northerly along said highway to the Hunt Mountain Road (U.S.F.S. Road 10); northwesterly along said road to U. S. Highway 14A; westerly along said highway to the Devils Canyon Road (U.S.F.S. Road 14); northerly along said road to the Sheep Mountain Road (U.S.F.S. Road 11); northerly along said road to the Wyoming-Montana state line; easterly along said line to Interstate Highway 90.

Area 39. Deer Creek. Beginning where U.S. Highway 14A crosses the Big Horn River; northerly down said river to the Wyoming-Montana state line; easterly along said line to the Sheep Mountain Road (U.S.F.S. Road 11); southerly along said road to the Devils Canyon Road (U.S.F.S. Road 14); southerly along said road to U.S. Highway 14A; westerly along said highway to the Big Horn River.

Area 40. Horse Creek. Beginning on the Big Horn River in the town of Greybull; northerly down river to U.S. Highway 14A; easterly along said highway to the Hunt Mountain Road (U.S.F.S. Road 10); southeasterly along said road to U.S. Highway 14 at Granite Pass; southwesterly along said highway to the Big Horn River at the town of Greybull.

Area 41. North Medicine Lodge. Beginning where U.S. Highway 14 crosses the Bighorn River in the town of Greybull; easterly along said highway to Granite Pass and the divide along the Bighorn Mountain range; southeasterly along said divide to the divide between Shell Creek and Medicine Lodge Creek; westerly along said divide to U.S.F.S. Road 341; westerly along said road to the Shell Ranger Station-Paintrock Lakes Road (U.S.F.S. road 17); southeasterly along said road to the Alkali Road (U.S.F.S. Road 338-BLM Road 1111); southwesterly along said road to Wyoming Highway 31; westerly along said highway to the Bighorn River at the town of Manderson; northerly down said river to U.S. Highway 14 in the town of Greybull.

Area 42. Medicine Lodge. Beginning at the junction of the Cold Springs Road and the Alkali Road near the town of Hyattville; northerly along the Alkali Road (becomes U.S.F.S. Road 338) to the Paint Rock Lakes Road (U.S.F.S. Road 17); northerly along said road to U.S.F.S. Road 341; easterly along said road to the divide between Shell Creek and Medicine Lodge Creek; easterly along said divide to the divide between Medicine Lodge Creek and Paint Rock Creek; southwesterly along said divide to the Cold Springs Road (U.S.F.S. Road 344) at Upper Medicine Lodge Lake; southwesterly along said road to its junction with the Alkali Road.

Area 45. Paint Rock Creek. Beginning where U.S. Highway 16 crosses the Big Horn River in the town of Worland; northerly down said river to Wyoming Highway 31 at the town of Manderson; easterly along said highway to the Cold Springs Road (BLM/U.S.F.S. Road 344); northeasterly along said road to the divide between Medicine Lodge Creek and Paint Rock Creek at Upper Medicine Lodge Lake; easterly along said divide to the divide along the Big Horn Mountain range; southeasterly along said divide to U.S. Highway 16 at Powder River Pass; westerly along said highway to the Big Horn River.

Area 46. Leigh Creek. Beginning at the junction of Wyoming Highway 436 (Rome Hill Road) and U.S. Highway 16 approximately four (4) miles east of the town of Ten Sleep; northeasterly along U.S. Highway 16 to the Canyon Creek Road (U.S.F.S. Road 25); southerly along said road to the Gold Mine Road (U.S.F.S. Road 452); southerly along said road to the Hazelton Road (Big Horn Divide Road-Johnson County Road 3); southerly along said road to the Rome Hill Road (Wyoming Highway 436); northwesterly along said road to U.S. Highway 16.

Area 47. Copper Mountain. Beginning where the Big Horn River intersects Wyoming Highway 172 (Black Mountain Road); easterly along said highway to the Kirby Creek Road (Hot Springs County Road 7); southerly along said road to the Bridger Creek Road (Fremont County Road 259); southerly along said road to the Badwater Road (Fremont County Road 117); southeasterly along said road to the Lysite-Moneta Road (Fremont County Road 176); southerly along said road to U.S. Highway 20-26; westerly along said highway to the town of Shoshoni; northerly along U.S. Highway 20 to the Wind River Indian Reservation boundary; north and west along said boundary to the Big Horn River; northerly down said river to Wyoming Highway 172.

Area 48. Upper Nowood. Beginning at the town of Moneta and U.S. Highway 20-26; northerly along the Lysite-Moneta Road (Fremont County Road 176) to the Badwater Road (Fremont County Road 117) at the town of Lysite; westerly along said road to the Bridger Creek Road (Fremont County Road 259); northerly along the Bridger Creek Road to the Kirby Creek Road (Hot Springs County Road 7); northerly along said road to Wyoming Highway 172 (Black Mountain Road); easterly along said road to the Murphy Dome-Mud Creek Road (BLM Road 1409); northeasterly along said road to the Nowater Stock Drive Road (BLM Road 1404); easterly along said road to the Upper Nowood Road; northeasterly along said road to Deep Creek; southerly up said creek to Lost Creek; southerly up said creek to the Cherry Creek Hill Stock Drive Road; northeasterly along said road to the Hazelton Road (Big Horn Divide Road); southerly along said road to the divide between the Middle Fork of the Powder River and Buffalo Creek; westerly along said divide to the divide between Sawmill Creek and Little Lost Creek; westerly along said divide to Deep Creek; southerly up said creek to the divide with Badwater Creek; southerly down said creek to the Badwater Road (Natrona County Road 102); southerly along said road to the Lost Cabin-Arminto Road (Natrona County Road 103); southeasterly along said road to the Buffalo Creek Road (Natrona County Road 105); southerly along said road to the Arminto-Waltman Road (Natrona County Road 104); southerly along said road to U.S. Highway 20-26; westerly along said highway to the town of Moneta.

Area 49. Otter Creek. Beginning at the junction of U.S. Highway 16 and Wyoming Highway 436 (Rome Hill Road) approximately four (4) miles east of the town of Ten Sleep; easterly along Wyoming Highway 436 to the Hazelton Road (Big Horn Divide Road-Johnson County Road 3); southerly along said road to the Cherry Creek Hill Stock Drive Road; southwesterly down said road to Lost Creek; northwesterly down said creek to Deep Creek; northwesterly down said creek to the Upper Nowood Road; southwesterly along said road to the Nowater Stock Drive (BLM Road 1404); westerly along said road to the Blue Bank Road (BLM Road 1411); northerly along said road to U.S. Highway 16; easterly along said highway to Wyoming Highway 436 (Rome Hill Road).

Area 50. Beartooth. All of the area north of the Clark's Fork River and west of Wyoming Highway 120.

Area 51. Crandall. All of the drainage of Soda Butte Creek outside of Yellowstone National Park; all of the south drainage of the Clark's Fork River down to and excluding the drainage of Russell Creek.

Area 52. Sunlight. All of the drainage of Sunlight Creek and Russell Creek.

Area 53. Dead Indian. All of the drainage of the Dead Indian Creek.

Area 54. Bald Ridge. All of the drainage of Pat O'Hara Creek, Paint Creek, Newmeyer Creek and Dead Indian Gulch west of Wyoming Highway 120.

Area 55. Grinnell. All of the north and west drainage of the North Fork of the Shoshone River down to but excluding the drainage of Sweetwater Creek; all of the south drainage of the North Fork of the Shoshone River down to but excluding the drainage of Elk Fork Creek.

Area 56. Wapiti Ridge. All of the drainage of the North Fork of the Shoshone River below and including the drainage of Sweetwater Creek and above the drainage of Jim Creek; all of the south drainage of the North Fork

of the Shoshone River below and including the drainage of Elk Fork Creek; all of the north and west drainage of the South Fork of the Shoshone River below and including the drainage of Ishawooa Creek.

Area 58. Sage Creek. Beginning where Wyoming Highway 120 leaves the town of Cody; southerly along said highway to Meeteetse Rim; westerly along said rim to the divide between the Greybull River and the South Fork of the Shoshone River; westerly along said divide to the west fork of Belknap Creek; northwesterly down said creek to the South Fork of the Shoshone River; northeasterly down said river to the town of Cody.

Area 59. Boulder Basin. All of the south and east drainage of the South Fork of the Shoshone River, west of the west fork and mainstream of Belknap Creek; down to the South Fork of the Shoshone River; all of the north and west drainage of the South Fork of the Shoshone River, above the drainage of Ishawooa Creek.

Area 60. Thorofare. All of the drainage of the Yellowstone River upstream from Yellowstone Lake outside of Yellowstone National Park.

Area 61. North Greybull River. All of the north and west drainage of the Greybull River west of Wyoming Highway 120.

Area 62. South Greybull River. All of the south and east drainage of the Greybull River located west of the mouth of the Wood River; all of the north and west drainage of the Wood River.

Area 63. Wood River-Gooseberry Creek. All of the south and east drainage of the Wood River; all of the south and east drainage of the Greybull River located east of the mouth of the Wood River; all of the drainage of Gooseberry Creek located west of Wyoming Highway 120.

Area 64. Owl Creek. Beginning where the divide between Gooseberry Creek and Grass Creek crosses Wyoming Highway 120; southeasterly along said highway to the Big Horn River; southerly up said river to the Wind River Indian Reservation boundary; westerly, then northerly, then westerly along said boundary to the divide between Owl Creek and the South Fork of the Wood River; northeasterly along said divide to the divide between Cottonwood Creek and Gooseberry Creek; northeasterly along said divide to the divide between Gooseberry Creek and Grass Creek; easterly along said divide to Wyoming Highway 120; in addition, all non-Indian fee title lands in that portion of Hot Springs County within the exterior boundaries of the Wind River Indian Reservation.

Area 65. McCullough Peaks. All of the area west of the Big Horn River that lies north of U.S. Highway 14-16-20 and east of Wyoming Highway 120.

Area 66. Basin. All of the area west of the Big Horn River; south of U.S. Highway 14-16-20 and U.S. Highway 14, east of Wyoming Highway 120 and north of Broadway Street in the town of Thermopolis.

Area 67. Wiggins Fork. All of the drainage of the Wind River that lies north of U.S. Highway 287 and west of the Wind River Indian Reservation and those areas of the Spence and Moriarity Wildlife Management Area east of the East Fork of the Wind River.

Area 68. Warm Springs. Beginning where U.S. Highway 287 crosses Jakey's Fork Creek; southwesterly up said creek to the Continental Divide; northwesterly along said divide to U.S. Highway 287 at Togwotee Pass; southeasterly along said highway to Jakey's Fork Creek.

Area 69. Whiskey Mountain. Beginning where U.S. Highway 287 crosses the west boundary of the Wind River Indian Reservation; southerly along said boundary to the Continental Divide; northwesterly along said divide to Jakey's Fork Creek; northeasterly down said creek to U.S. Highway 287; southeasterly along said highway to the Wind River Indian Reservation boundary.

Area 70. Buffalo Fork. Beginning where U.S. Highway 26-287 intersects the Grand Teton National Park boundary; northerly along said boundary to Pacific Creek; northeasterly up said creek to Gravel Creek; northerly up said creek to the Snake River Trail; northerly along said trail to the south boundary of Yellowstone National Park;

easterly along said boundary to the Continental Divide; southerly and easterly along said divide to U.S. Highway 26-287 at Togwotee Pass; westerly along said highway to the east boundary of Grand Teton National Park.

Area 71. Pacific Creek. Beginning where Pacific Creek crosses the Grand Teton National Park boundary; northerly along said boundary to the Targhee National Forest boundary; northerly along said boundary to the southern boundary of Yellowstone National Park; easterly along said boundary to the Snake River Trail at Fox Park; southwesterly along said trail over Big Game Ridge to Gravel Creek; southerly down said creek to Pacific Creek; southerly down said creek to the Grand Teton National Park boundary.

Area 72. Berry Creek. All of the drainages of Berry Creek, Owl Creek and Webb Canyon Creek and that area north of Berry Creek to the Grand Teton National Park boundary.

Area 73. Targhee-Alta. Beginning where Wyoming Highway 22 crosses the Wyoming-Idaho state line; northerly along said line to the south boundary of Yellowstone National Park; easterly along said boundary to the Targhee National Forest boundary; southerly along said boundary to the Grand Teton National Park boundary; southerly along said boundary to Wyoming Highway 390; southerly along said highway to Wyoming Highway 22; westerly along said highway to the Wyoming-Idaho state line.

Area 74. Ditch Creek. Beginning where Ditch Creek crosses the Grand Teton National Park boundary; northeasterly along said boundary to Brush Creek; southerly up said creek to the divide between Brush Creek and Ditch Creek; southerly along a posted boundary to Ditch Creek; southerly down said creek to the Grand Teton National Park boundary.

Area 75. Snake River. Beginning at the junction of the Gros Ventre-Kelly Road and U.S. Highway 26-89-191; northerly along said highway to Ditch Creek; westerly along said creek to the Snake River proper; northerly along the easternmost bank of the main channel of the Snake river to the northernmost channel of Spread Creek; easterly along said creek to U.S. Highway 26-89-191; southwesterly along said highway to U.S.F.S. Road 30310 at the Cunningham Cabin; southerly along said road to the Grand Teton National Park boundary; southerly along said boundary to the southernmost intersection with the Shadow Mountain-Kelly Road (U.S.F.S. Road 30340); southwesterly along said road to the junction of the Teton Science School road; northeasterly along said road one and one-quarter (1¼) miles to a marked boundary; easterly one (1) mile to the Grand Teton National Park boundary; southerly along the Grand Teton National Park boundary to the Gros Ventre-Kelly Road; southwesterly along said road to U.S. Highway 26-89-191.

Area 77. National Elk Refuge. Beginning where U.S. Highway 26 crosses the Gros Ventre River; easterly up said river to the Bridger-Teton National Forest boundary; southerly along said boundary to the town of Jackson and the National Elk Refuge boundary; westerly along said boundary to U.S. Highway 26; northerly along said highway to the Gros Ventre River.

Area 78. Wilson. Beginning at the junction of Wyoming Highway 22 and Wyoming Highway 390; northerly along Wyoming Highway 390 to the Grand Teton National Park boundary; northerly, easterly and southerly along said boundary to U.S. Highway 26-89-191; southerly along said highway to its junction with Wyoming Highway 22; westerly along said highway to its junction with Wyoming Highway 390.

Area 79. Teton Park. Beginning where the U.S. Forest Service access road (U.S.F.S. Road 30310) near Cunningham Cabin intersects U.S. Highway 26-89-191; northerly along said highway to the junction of U.S. Highway 89-287 at Moran; northwesterly along said highway to the Grand Teton National Park boundary easterly and southerly along said boundary to the U.S. Forest Service access road (U.S. F.S. Road 30310) near Cunningham Cabin; westerly along said road to U.S. Highway 26-89-191.

Area 80. Sheep Creek. All of the drainages of Flat Creek, Sheep Creek and Nowlin Creek east of the National Elk Refuge.

Area 81. Spread Creek. Beginning where the Grand Teton National Park boundary crosses the Gros Ventre River east of the town of Kelly; northerly along said boundary to Ditch Creek; northeasterly up said creek to a posted boundary; straight north along the posted boundary to the divide between Brush Creek and Ditch Creek; northerly down Brush Creek to the Grand Teton National Park boundary; northerly along said boundary to U.S.

Highway 26-287; easterly along said highway to Togwotee Pass and the Continental Divide; southerly along said divide to the Moccasin Basin Road (U.S.F.S. Road 30750); southerly down said road to the North Fork of Fish Creek at Calf Creek; southerly down said creek to Fish Creek; southeasterly down said creek to the Gros Ventre River; westerly down said river to the Grand Teton National Park boundary.

Area 82. Crystal Peak. Beginning where the Gros Ventre River crosses the National Elk Refuge boundary near the town of Kelly; easterly up said river to Kinky Creek; easterly up said creek to the Darwin Ranch Road (U.S.F.S. Road 620); easterly along said road to the divide between the Green River and Gros Ventre River; southwesterly along said divide to the divide between the Green River and Hoback River at Hodges Peak; westerly along the divide between Flat Creek and the Gros Ventre River; northerly along said divide to the National Elk Refuge boundary; northerly along said boundary to the Gros Ventre River.

Area 83. Fish Creek. Beginning where Kinky Creek enters the Gros Ventre River; northerly down said river to Fish Creek; northeasterly up said creek to the North Fork of Fish Creek; northerly up said creek to the Moccasin Basin Road (U.S.F.S. Road 30750) at Calf Creek; northerly up said road to the Continental Divide; southerly along said divide to the Union Pass Road (U.S.F.S. Road 600); southwesterly along said road to the Darwin Ranch Road (U.S.F.S. Road 620); westerly along said road to Kinky Creek; westerly down said creek to the Gros Ventre River.

Area 84. Lower Hoback. Beginning where U.S. Highway 191 crosses Flat Creek at the north edge of the town of Jackson; due east to the National Elk Refuge boundary; easterly along said boundary to the Bridger-Teton National Forest boundary and the ridge between Twin Creeks and Cache Creek; easterly along said ridge to Jackson Peak; southerly along the divide between Flat Creek and Cache Creek to Cache Peak; easterly along the divide between Flat Creek and Granite Creek to Pyramid Peak; southerly along the divide between the Gros Ventre River and the Hoback River to Steamboat Peak; southerly and westerly along the divide between Shoal Creek and Dell Creek to the Riling Draw Road; southerly along said road to the Dell Creek Road; westerly along said road to the Hoback River; westerly down said river to Cliff Creek; southerly up Cliff Creek to the divide between the Greys River and the Hoback River; northwesterly along said divide to the divide between the Greys River and Willow Creek; northerly along said divide to the divide between the Bailey Creek and Willow Creek (Greyback Ridge); northerly along said divide to Dry Wash Draw; westerly down said draw to Baily Creek; northwesterly down said creek to the Snake River; northerly up said river to Wyoming Highway 22; easterly along said highway to U.S. Highway 191; easterly along said highway to Flat Creek at the north edge of the town of Jackson.

Area 85. Fall Creek. Beginning where Wyoming Highway 22 crosses the Snake River; southerly and westerly down the Snake River to the Wyoming-Idaho state line; northerly along said line to Wyoming Highway 22; easterly along said highway to the Snake River.

Area 86. Monument Ridge. Beginning at the head of Cliff Creek; northerly down said creek to the Hoback River; southerly up said river to the South Fork of the Hoback River; due east to the Hoback Rim and the divide between the Hoback River and the Green River; southwesterly along said divide to the divide between the Greys River and the Hoback River; northerly along said divide to the head of Cliff Creek.

Area 87. Raspberry Ridge. Beginning where U.S. Highway 191 crosses the divide between the Green River and the Hoback River on the Hoback Rim; southwesterly along said divide to a point east of the confluence of the South Fork of the Hoback River and the Hoback River; due west to the Hoback River; northerly down said river to the Dell Creek Road; easterly along said road to the Riling Draw Road; northerly along said road to the divide between Shoal Creek and Dell Creek; northeasterly along said divide to the divide between the Gros Ventre River and the Hoback River at Steamboat Peak; southeasterly along said divide to the divide between the Green River and the Hoback River at Hodges Peak; southerly along said divide to U.S. Highway 191.

Area 88. Greys Feedground. Beginning at the Wyoming-Idaho state line on the Snake River; easterly up said river to the Greys River; easterly up said river to the confluence of the Greys River and Squaw Creek; southwesterly from said confluence to the ridge between the Squaw Creek drainage and the Greys River; southerly up said ridge to the divide between the Greys River and the Salt River; southerly along said divide to the Stewart Sheep Trail; westerly along said trail to the Stewart Creek Road; westerly and southerly along said road to U.S.

Highway 89; northerly along said highway to the McCoy Creek Road; westerly and northerly along said road to the Wyoming-Idaho state line; north along said line to the Snake River.

Area 89. Lower Greys River. Beginning at the confluence of Greys River and the Snake River near Alpine; easterly up the Snake River to Bailey Creek; southeasterly up said creek to Dry Wash Draw; easterly up said draw to the divide between Bailey Creek and Willow Creek (Greyback Ridge); southerly along said divide to the divide between Willow Creek and the Greys River; southerly along said divide to the divide between the Greys River and the Hoback River; southerly and easterly along said divide between the Greys River and the Green River; southerly along said divide to the head of Blind Bull Creek; westerly down said creek to Greys River; southerly up said river to Meadow Creek; westerly up said creek to the divide between the Greys River and the Salt River; northerly along said divide to the ridge between the Squaw Creek drainage and the Greys River; northeasterly along said ridge to the confluence of Squaw Creek and the Greys River; westerly down said river to the Snake River.

Area 90. Upper Greys River. Beginning at the point where Blind Bull Creek runs into the Greys River; easterly up said creek to the divide between the Greys River and the Green River; southerly and westerly along said divide to the divide between the Greys River and the Smith Fork Creek; northerly along said divide to the divide between the Greys River and Salt River; northerly along said divide to the head of Meadow Creek; easterly down said creek to Greys River; northerly down said river to Blind Bull Creek.

Area 91. Salt River. Beginning at the point where the McCoy Creek Road crosses the Wyoming-Idaho state line; easterly and southerly along said road to U.S. Highway 89; southerly along said highway to the Stewart Creek Road; northerly and easterly along said road to the Stewart Driveway Trail; easterly along said trail to the divide between the Salt River and the Greys River; southerly along said divide to the divide between the Bear River and the Salt River; westerly along said divide to the Wyoming-Idaho state line; north along said line to the McCoy Creek Road.

Area 92. Piney-Horse Creek. Beginning where the East Green River Road (Sublette County Road 23-110) intersects Wyoming Highway 351; westerly along said highway to the Green River; northerly up said river to Cottonwood Creek; westerly up said creek to the South Cottonwood Creek; westerly up said creek to the South Fork of the South Fork of Cottonwood Creek; westerly up said creek to the divide between the Greys River and the Green River; northerly along said divide to the divide between the Green River and the Hoback River; northwesterly along said divide (Hoback Rim) to U.S. Highway 191; southerly along said highway to the East Green River Road (Sublette County Road 23-110) at Cora Junction; southerly along said road to Wyoming Highway 351.

Area 93. Waterdog Lakes. Beginning where U.S. Highway 191 crosses the Green River at Warren Bridge; northwesterly along said highway to the divide between the Hoback River and the Green River (Hoback Rim); northerly along said divide to the divide between the Green River and the Gros Ventre River at Hodges Peak; northeasterly along said divide to the Darwin Ranch Road (U.S.F.S. Road 620); easterly along said road to the Union Pass Road (U.S.F.S. Road 600); southerly and easterly along said road to Tosi Creek; easterly down said creek to the Green River; southerly down said river to U.S. Highway 191.

Area 94. South Piney. Beginning where LaBarge Creek enters the Green River; westerly up said river to the divide between the Green River and the Greys River; northerly along said divide to the head of the South Fork of South Cottonwood Creek; easterly down said creek to South Cottonwood Creek; easterly down said creek to Cottonwood Creek; easterly down said creek to the Green River; southerly down said river to LaBarge Creek.

Area 95. Green River. Beginning where Tosi Creek enters the Green River; westerly up said creek to the Union Pass Road (U.S.F.S. Road 600); northerly and easterly along said road to the Continental Divide; southerly along said divide to Mt. Helen; westerly to Summit Lake and the divide between the Green River and Pine Creek; northwesterly along said divide to the divide between the Green River and the New Fork River; northerly along said divide to the head of Jim Creek; westerly down said creek to the Green River; northerly up said river to Tosi Creek.

Area 96. New Fork. Beginning where U.S. Highway 191 crosses Pine Creek in the town of Pinedale; westerly and northerly along said highway to the Green River at Warren Bridge; northerly up said river to Jim Creek; easterly up said creek to the divide between the New Fork River and the Green River; southerly along said



divide to the divide between the Green River and Pine Creek; southeasterly along said divide to Summit Lake and Pine Creek; southerly down said creek to U.S. Highway 191.

Area 97. Pinedale. Beginning where the East Green River Road (Sublette County Road 23-110) intersects Wyoming Highway 351; northerly along said highway to Cora Junction and U.S. Highway 191; easterly along said highway to Pine Creek; northerly up said creek to Summit Lake; easterly to Mt. Helen and the Continental Divide; southerly along said divide to the Middle Fork of Boulder Creek; westerly down said creek to Boulder Creek; westerly down said creek to the New Fork River; southerly down said river to Wyoming Highway 351; westerly along said highway to the East Green River Road (Sublette County Road 23-110).

Area 98. Boulder. Beginning where the Big Sandy River enters the Green River; northerly up the Green River to Wyoming Highway 351; easterly along said highway to the New Fork River; northerly up said river to Boulder Creek; easterly up said creek to the Middle Fork of Boulder Creek; easterly up said creek to the Continental Divide; southerly along said divide to the Big Sandy River; southerly along said river to the Big Sandy Reservoir Road (Sweetwater County Road 28); westerly along said road to U.S. Highway 191; southerly along said highway to the Big Sandy River; southwesterly down said river to the Green River.

Area 99. Big Sandy. Beginning at the town of Farson and U.S. Highway 191; northerly along said highway to the Big Sandy Reservoir Road (Sweetwater County Road 28); easterly along said road to the Big Sandy River at the dam; northerly up said river to the Continental Divide; southeasterly along said divide to Mt. Nystrom; easterly from Mt. Nystrom to Sweetwater Gap and the headwaters of the Sweetwater River; southerly down said river to Wyoming Highway 28; southwesterly along said highway to U.S. Highway 191 at the town of Farson.

Area 100. Steamboat. Beginning where Interstate Highway 80 crosses the Green River; northerly up said river to the Big Sandy River; northeasterly along said river to U.S. Highway 28; northeasterly along said highway to the Sweetwater River; easterly down said river to the Three Forks-Atlantic City Road (BLM Road 2317) at Phelps-Dodge Bridge; easterly along said road to the Wamsutter-Crooks Gap Road (Sweetwater County Road 23); southerly along said road to Interstate Highway 80; westerly along said highway to the Green River.

Area 102. West Green River. Beginning where Interstate Highway 80 crosses the Green River; westerly along said highway to U.S. Highway 30; northwesterly along said highway to the town of Kemmerer and Ham's Fork Creek; northerly up said creek to the Commissary Ridge; northerly along said ridge to the head of LaBarge Creek; southeasterly down said creek to the Green River; southeasterly down said river to Interstate Highway 80.

Area 103. Raymond Mountain. Beginning where the Bear River crosses the Wyoming-Idaho state line; northerly along said line to the divide between the Salt River and Bear River; easterly along said divide to the divide between the Salt River and Smiths Fork; northeasterly along said divide to the head of Smiths Fork Creek; southerly down said creek to the Bear River at the town of Cokeville; northwesterly down said river to the Wyoming-Idaho state line.

Area 104. Lincoln. Beginning at the town of Kemmerer and U.S. Highway 30; westerly along said highway to Sage Junction and Wyoming Highway 89; southwesterly along said highway to the Wyoming-Utah state line; northerly along said line to the Wyoming-Idaho state line; northerly along said line to the Bear River; southeasterly up said river to the town of Cokeville and Smith's Fork Creek; northerly up said creek to the divide between the Smith's Fork and Greys River; southeasterly along said divide to Commissary Ridge; southerly along said ridge to the head of Ham's Fork Creek; southerly down said creek to U.S. Highway 30.

Area 105. Carter Lease. Beginning where Interstate Highway 80 crosses the Wyoming-Utah state line; northerly along said line to Wyoming Highway 89 west of Sage Junction; easterly along said highway to U.S. Highway 30; easterly then southerly along said highway to Interstate Highway 80; westerly along said highway to the Wyoming-Utah state line.

Area 106. Uinta. Beginning where Interstate Highway 80 crosses the Wyoming-Utah state line; easterly along said highway to Wyoming Highway 414; southerly along said highway to Wyoming Highway 410 at the town of Mountain View; southerly along said highway to the Stateline Dam Road (U.S.F.S. Road 072, Uinta County

Road 283); southerly along said road to the Wyoming-Utah state line; west then north along said line to Interstate Highway 80.

Area 107. Hickey Mountain. Beginning where the Flaming Gorge Reservoir crosses the Wyoming-Utah state line; west along said line to the Stateline Dam Road (U.S.F.S. Road 072, Uinta County Road 283); northerly along said road to Wyoming Highway 410; northerly along said highway to Interstate Highway 80; easterly along said highway to the Green River; southerly down said river to Flaming Gorge Reservoir; southerly along the east shore of said reservoir to the Wyoming-Utah state line.

Area 108. South Rawlins. Beginning at the city of Rawlins; southerly along Wyoming Highway 71 to the Sage Creek Road (Carbon County Road 401); southerly along said road to Sage Creek; southwesterly up said creek to the Rawlins City Water Works Road below Sage Creek Reservoir; southerly along said road to the McCarty Canyon Road (Carbon County Road 503); southwesterly along said road to the Miller Hill Road (BLM Road 3328); northwesterly along said road to the Muddy Creek Road (BLM Road 3306); westerly along said road to Muddy Creek; westerly down said creek to Wyoming Highway 789; northerly along said highway to Interstate Highway 80; easterly along said highway to the city of Rawlins.

Area 110. Upper Platte River. Beginning where Wyoming Highway 130 crosses the Laramie River-North Platte River Divide; southerly along said divide to Douglas Creek; southerly down said creek to U.S.F.S. Road 543 at Keystone; southerly along said road to U.S.F.S. Road 512; southeasterly along said road to Wyoming Highway 230; southwesterly along said highway to the Wyoming-Colorado state line; westerly along said line to Wyoming Highway 230; northwesterly along said highway to Wyoming Highway 130; easterly along said highway to the divide between the Laramie River and the North Platte River.

Area 111. Seminole. Beginning at the city of Rawlins; northerly along U.S. Highway 287 to the South Ferris Road (Carbon County Road 100); easterly along said road to the Buzzard Road (Carbon County Road 497-Natrona County Road 410); northerly along said road to Wyoming Highway 220; northeasterly along said highway to the Kortess Road (Natrona County Road 407); southerly along said road to the North Platte River; southerly up said river to Interstate Highway 80; westerly along said highway to the city of Rawlins.

Area 113. Rochelle Hills. Beginning at the junction of Wyoming Highway 59 and Wyoming Highway 450; easterly along Wyoming Highway 450 to the Lynch Road; southerly along said road to the Clareton Road (Converse County Road 39) at the Weston-Converse County line; southwesterly along said road to the Dull Center Road (Converse County Road 38); easterly along said road to the North Lance Creek Road at the Converse-Niobrara County Line; easterly along said road to the Cow Creek Road (Niobrara County); southerly along said road to the Burke Road; westerly along said road to the Tilliard Ranch Road at the Niobrara-Converse County line; westerly along said Road to the Cow Creek Road (Converse County Road 45); westerly along said road to the Dull Center Road (Converse County Road 38); southerly and westerly along said road to Wyoming Highway 59; northerly along said highway to its junction with Wyoming Highway 450.

Area 114. Kyle. Beginning at the city of Laramie at the junction of Interstate Highway 80 and U.S. Highway 30-287; westerly along Interstate Highway 80 to Wyoming Highway 72; northerly along said highway to U.S. Highway 30-287; southeasterly along said highway to Interstate Highway 80.

Area 116. Bear Lodge. Beginning where the Belle Fourche River crosses the Wyoming-South Dakota state line; southerly along said line to Interstate Highway 90; southwesterly along said highway to U. S. Highway 14 at the town of Moorcroft; northeasterly along said highway to Wyoming Highway 24; northerly along said highway to the Belle Fourche River in the town of Hulett; northeasterly and southeasterly down said river to the Wyoming-South Dakota state line.

Area 117. South Black Hills. Beginning where Interstate Highway 90 crosses the Wyoming-South Dakota state line; southerly along said line to the Black Hills National Forest boundary; westerly along said boundary to the Sand Creek Road (U.S.F.S. Road 863) at the State of Wyoming's Ranch A property; southerly along said road to the Moskee Road; southeasterly along said road to the Deer Creek Road (U.S.F.S. Road 807); southeasterly along said road to the Wyoming-South Dakota state line; southerly along said line to U.S. Highway

16; northwesterly along said highway to Interstate Highway 90; northeasterly along said highway to the Wyoming-South Dakota state line.

Area 118. Shamrock Hills. Beginning at the city of Rawlins; westerly along Interstate Highway 80 to the Wamsutter-Crooks Gap Road (Sweetwater County Road 23); northerly along said road to the Bairoil Road (Sweetwater County Road 22); easterly along said road to Wyoming Highway 73; easterly along said highway to U.S. Highway 287; southerly along said highway to Interstate Highway 80.

Area 120. Buffalo Creek. Beginning at the intersection of the 33 Mile Road (Natrona County Road 110) and the Buffalo Creek Road (Natrona County Road 105); northwesterly along the 33 Mile Road (Natrona County Road 110 in Natrona County) to the Big Horn Mountain Road; southwesterly along said road (Natrona County Road 109 in Natrona County) to the divide between the Middle Fork of the Powder River and Buffalo Creek; westerly along said divide to the divide between Sawmill Creek and Little Lost Creek; westerly along said divide to Deep Creek; southerly up said creek to the divide between Deep Creek and Badwater Creek; southerly down Badwater Creek to the Badwater Road (Natrona County Road 102); southeasterly along said road to the Arminto-Lost Cabin Road (Natrona County Road 103); southeasterly along said road to the Waltman-Arminto Road (Natrona County Road 104); southerly along said road to Wyoming Highway 20-26 at Waltman; easterly along said highway to Interstate Highway 25 in the city of Casper; northerly along said highway to Wyoming Highway 259; northerly along said highway to U.S. Highway 387 at the town of Midwest; westerly along said highway to the Smoky Gap Road (Natrona County Road 115); westerly along said road to the Dead Horse Road (Natrona County Road 114); southwesterly along said road to the Wild Horse Trail Road (Natrona County Road 113); westerly along said road to the 33 Mile Road (Natrona County Road 110); northwesterly along said road to the Buffalo Creek Road intersection (Natrona County Road 105).

Area 121. Trout Creek-Rattlesnake Mountain. All of the drainage of Jim Creek, Trout Creek and Rattlesnake Creek north of the North Fork of the Shoshone River; all of the drainage of Cottonwood Creek, Dry Creek and Trail Creek west of Wyoming Highway 120.

Area 122. Pine Ridge. Beginning at the intersection of Interstate Highway 25 and Wyoming Highway 259; northerly along Wyoming Highway 259 to U.S. Highway 387 at the town of Midwest; northeasterly along U.S. Highway 387 to the Ross Road (in Converse County, County Road 31); southeasterly along said road to Wyoming Highway 95; southwesterly along said highway to the North Platte River at the town of Glenrock; westerly up said river to Interstate Highway 25 in the city of Casper; northerly along said highway to Wyoming Highway 259.

Area 123. Black Thunder. Beginning where Wyoming Highway 59 crosses the Belle Fourche River; northeasterly down said river to the mouth of Raven Creek; southeasterly up said creek to the Raven Creek Road; southerly along said road to Wyoming Highway 116; southerly along said highway to Wyoming Highway 450; westerly along said highway to Wyoming Highway 59; northerly along said highway to the Belle Fourche River.

Area 124. Powder Rim. Beginning at the junction of Wyoming Highway 789 and the Wyoming-Colorado state line; westerly along said line to Wyoming Highway 430; northerly along said highway to Interstate Highway 80; easterly along said highway to Wyoming Highway 789; southerly along said highway to the Wyoming-Colorado state line.

Area 125. Elk Mountain. Beginning at the junction of Interstate Highway 80 and U.S. Highway 30 at the Saratoga interchange; northeasterly along U.S. Highway 30 to Wyoming Highway 72 at the Hanna interchange; southeasterly along Wyoming Highway 72 to the Pass Creek Road (Carbon County Road 404) west of the town of Elk Mountain; southerly and westerly along said road to Wyoming Highway 130; northerly along said highway to Interstate Highway 80.

Area 126. Flat Top. Beginning at the town of Douglas and Wyoming Highway 59, northerly along said highway to the Dull Center Road (Converse County Road 38) at the town of Bill; easterly and northerly along said road to the Cow Creek Road (Converse County Road 45); easterly along said road to the Tilliard Ranch Road; easterly along said road to the Burke Road at the Converse-Niobrara County Line; easterly along said road to the Cow Creek Road; southeasterly along said road to the North Lance Creek Road; southerly along said road to Wyoming Highway 272; southerly along said highway to Wyoming Highway 270; westerly and southerly along said

highway to U.S. Highway 18-20 at the town of Manville; westerly along said highway to Interstate Highway 25 at Orin Junction; southerly along said highway to the North Platte River; westerly and northerly up said river to Wyoming Highway 59 at the town of Douglas.

Area 127. Crowheart Butte. All non-Indian owned fee title lands within the exterior boundaries of the Wind River Indian Reservation, and all lands within the Bureau of Reclamation's Riverton and Boysen Unit boundaries, and those lands within Boysen State Park south of Cottonwood Creek, west of Boysen Reservoir, and south of U.S. Highway 20-26; excluding those areas of the Spence and Moriarity Wildlife Management Area that lie east of the East Fork of the Wind River, and excluding those lands within Hot Springs County.

Area 128. Muskrat. Beginning where U.S. Highway 20-26 intersects the Wind River Indian Reservation boundary; easterly along said highway to the town of Waltman and the Gas Hills Road (Natrona County Road 212); southwesterly along said road to the Dry Creek Road (Natrona County Road 321); southeasterly along said road to Wyoming Highway 220; southwesterly along said highway to U.S. Highway 287; westerly along said highway to Wyoming Highway 135 (Sand Draw Road); northerly along said highway to the south boundary of the Wind River Indian Reservation; easterly and northerly along said boundary to U.S. Highway 20-26.

Area 129. Non-Herd Unit. All of Campbell, Converse, Crook, Johnson, Natrona, Niobrara, Sheridan, and Weston Counties, excluding lands within other described and numbered elk hunt areas.

Area 130. Bolten Rim. Beginning at the City of Rawlins; easterly along Interstate Highway 80 to the North Platte River; southerly up said river to Sage Creek; southwesterly up said creek to the Sage Creek Road (Carbon County Road 401); northerly along said road to Wyoming Highway 71; northerly along said highway to the City of Rawlins.

#### WYOMING GAME AND FISH COMMISSION

By:

Bill Williams, DVM, President

Dated: April 24, 2007

# 2007 ELK HUNT AREAS

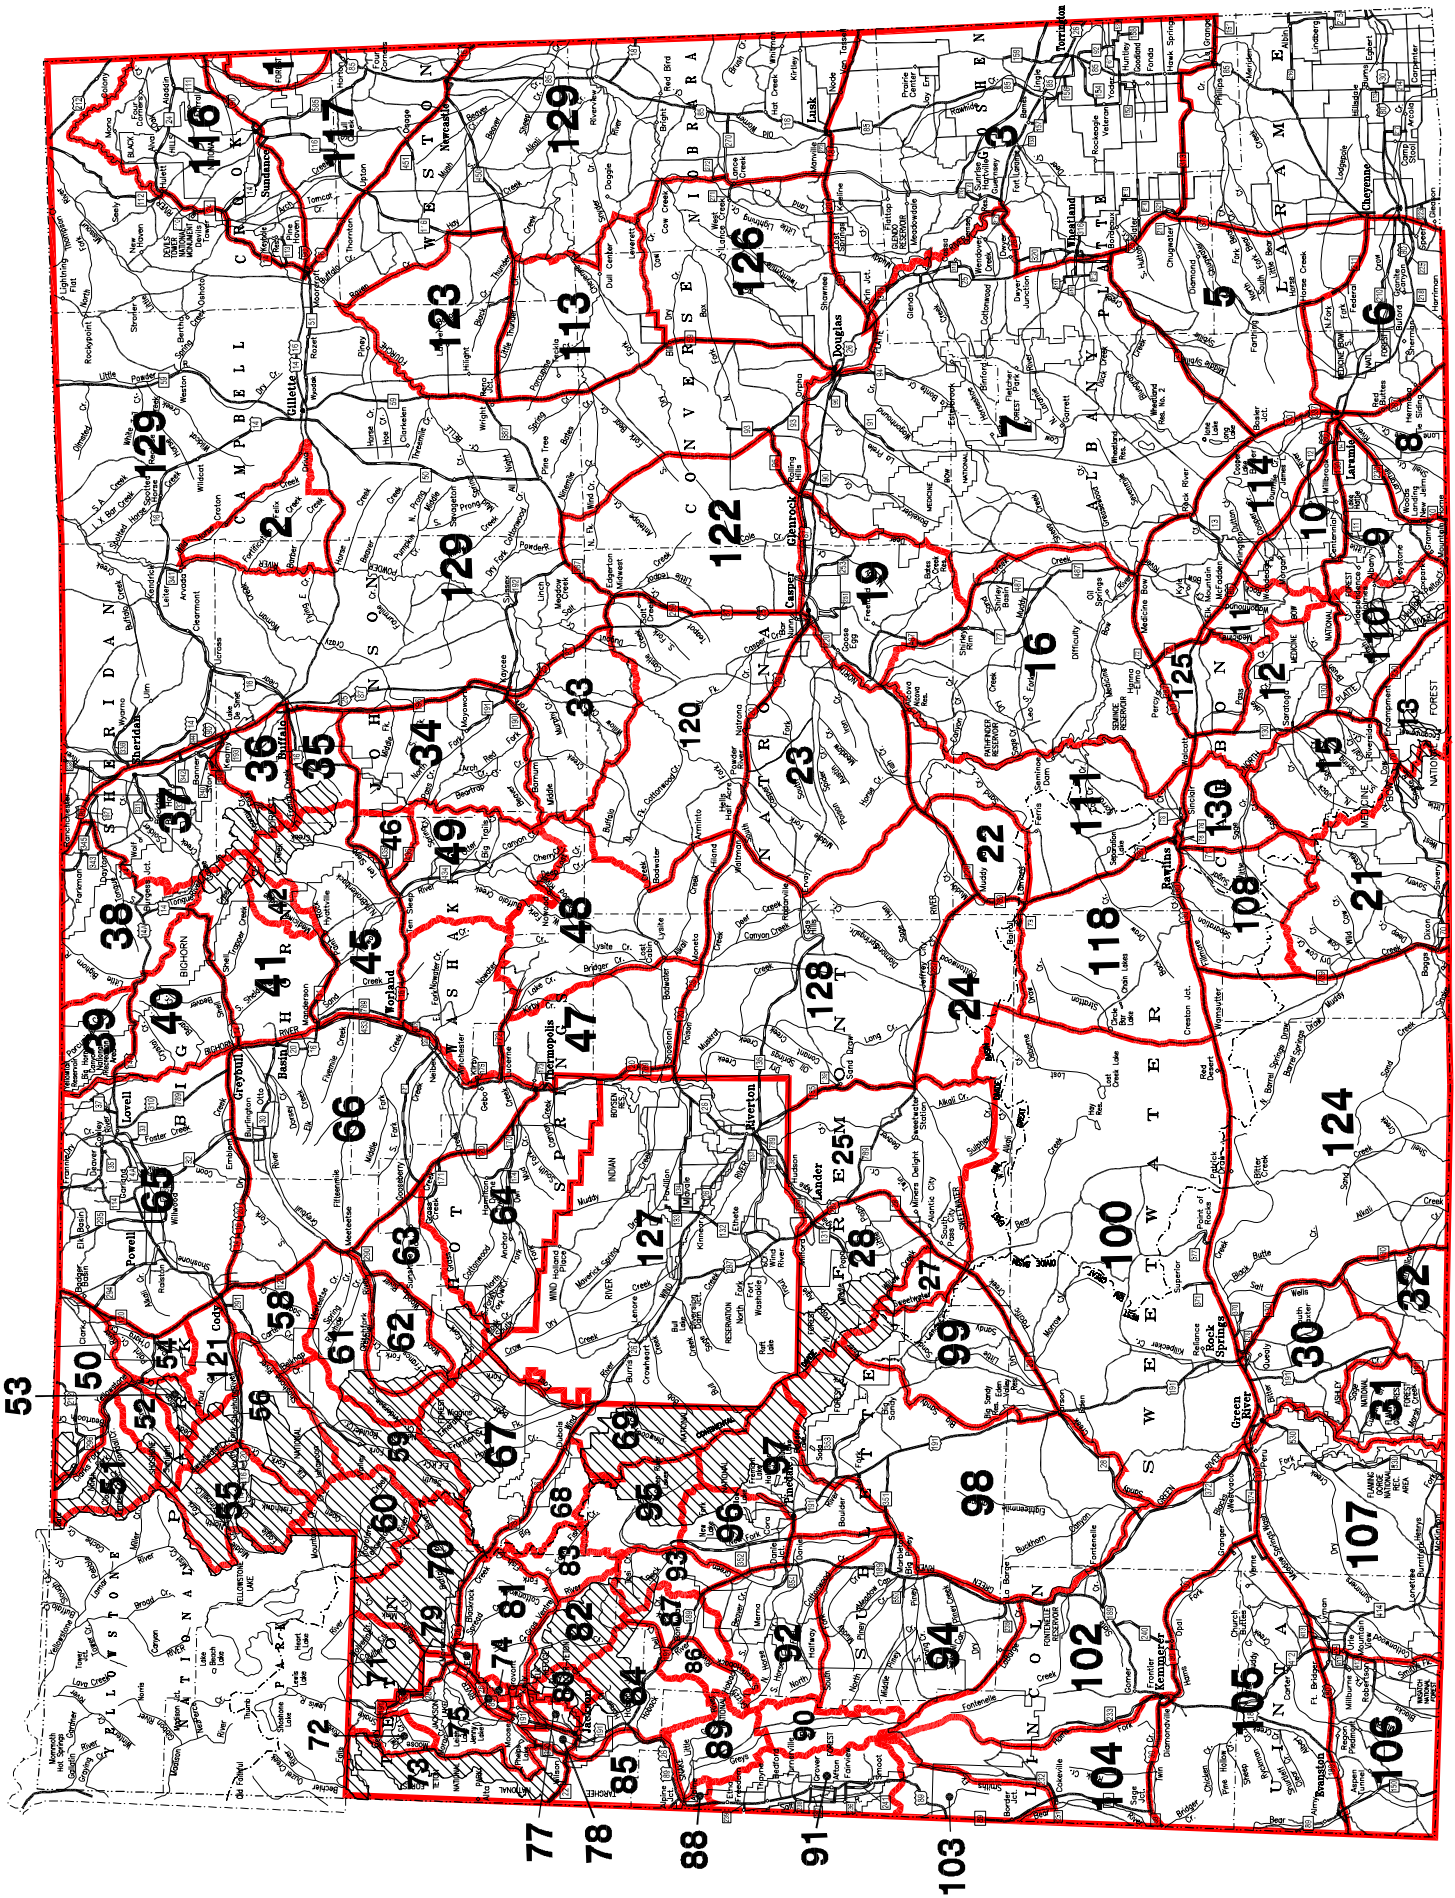

THIS MAP IS FOR GENERAL REFERENCE ONLY. Please use the written boundary descriptions in this regulation for detailed boundary information. Note: Wilderness area, nonresidents must have guides.



**MOOSE**  
**HARVEST STATEWIDE**  
**BY TOTAL HUNTERS**  
**2007**

|             | LICENSES<br>SOLD | NUMBER<br>ACTIVE<br>HUNTERS | HARVEST |     |      |       | TOTAL<br>RECREATION<br>DAYS | HUNTER<br>SUCCESS | DAYS/<br>HARVEST |
|-------------|------------------|-----------------------------|---------|-----|------|-------|-----------------------------|-------------------|------------------|
|             |                  |                             | BULL    | COW | CALF | TOTAL |                             |                   |                  |
| STATE TOTAL | 759              | 750                         | 503     | 146 | 20   | 669   | 4674                        | 89.2%             | 6.99             |
| RESIDENT    | 630              | 624                         | 402     | 135 | 19   | 556   | 3983                        | 89.1%             | 7.16             |
| NONRESIDENT | 129              | 126                         | 101     | 11  | 1    | 113   | 691                         | 89.68%            | 6.11             |

TEN-YEAR COMPARISON OF HARVEST TABLE

|         |      |      |      |      |      |      |      |      |      |      |
|---------|------|------|------|------|------|------|------|------|------|------|
| YEAR    | 1998 | 1999 | 2000 | 2001 | 2002 | 2003 | 2004 | 2005 | 2006 | 2007 |
| HARVEST | 1061 | 1101 | 1209 | 1215 | 1160 | 999  | 770  | 682  | 636  | 669  |

HARVEST BY HARVEST TOOL

|  |         |         |       |
|--|---------|---------|-------|
|  | ARCHERY | FIREARM | TOTAL |
|  | 13.2    | 86.8    | 100%  |

TABLE I  
MOOSE  
HARVEST BY HUNT AREA  
2007

| AREA<br>(cross hunt areas)              | TYPE                                       | ACTIVE<br>LICS/HTRS | HARVEST |     |      |       | HUNTER<br>SUCCESS | DAYS/<br>HARVEST | HUNTER<br>DAYS | (cross hunt incl)<br>LICENSES<br>SOLD |
|-----------------------------------------|--------------------------------------------|---------------------|---------|-----|------|-------|-------------------|------------------|----------------|---------------------------------------|
|                                         |                                            |                     | BULL    | COW | CALF | TOTAL |                   |                  |                |                                       |
| 1 Goose Creek                           | Limited 1                                  |                     |         |     |      |       |                   |                  |                |                                       |
|                                         | Resident                                   | 17                  | 12      | 1   | 0    | 13    | 76.47%            | 14.10            | 183            | 17                                    |
|                                         | Nonresident                                | 9                   | 9       | 0   | 0    | 9     | 100.00%           | 4.33             | 39             | 9                                     |
|                                         | Limited 2                                  |                     |         |     |      |       |                   |                  |                |                                       |
|                                         | Resident                                   | 19                  | 1       | 18  | 0    | 19    | 100.00%           | 2.75             | 52             | 19                                    |
|                                         | Area Total                                 | 45                  | 22      | 19  | 0    | 41    | 91.11%            | 6.70             | 275            | 45                                    |
| 2 Lander Area                           | Limited 1                                  |                     |         |     |      |       |                   |                  |                |                                       |
|                                         | Resident                                   | 4                   | 3       | 0   | 0    | 3     | 75.00%            | 10.33            | 31             | 4                                     |
|                                         | Nonresident                                | 1                   | 1       | 0   | 0    | 1     | 100.00%           | 1.00             | 1              | 1                                     |
|                                         | Area Total                                 | 5                   | 4       | 0   | 0    | 4     | 80.00%            | 8.00             | 32             | 5                                     |
| 3 Pinedale-Sandy                        | Limited 1                                  |                     |         |     |      |       |                   |                  |                |                                       |
|                                         | Resident                                   | 5                   | 4       | 0   | 0    | 4     | 80.00%            | 3.75             | 15             | 5                                     |
|                                         | Nonresident                                | 1                   | 1       | 0   | 0    | 1     | 100.00%           | 3.00             | 3              | 1                                     |
|                                         | Area Total                                 | 6                   | 5       | 0   | 0    | 5     | 83.33%            | 3.60             | 18             | 6                                     |
| 4 Pinedale-Off NTL                      | Limited 1                                  |                     |         |     |      |       |                   |                  |                |                                       |
|                                         | Resident                                   | 13                  | 13      | 0   | 0    | 13    | 100.00%           | 6.60             | 86             | 13                                    |
|                                         | Nonresident                                | 3                   | 2       | 0   | 0    | 2     | 66.67%            | 6.00             | 12             | 3                                     |
|                                         | Limited 2                                  |                     |         |     |      |       |                   |                  |                |                                       |
|                                         | Resident                                   | 5                   | 0       | 3   | 1    | 4     | 80.00%            | 3.75             | 15             | 5                                     |
|                                         | Area Total                                 | 21                  | 15      | 3   | 1    | 19    | 90.48%            | 5.94             | 113            | 21                                    |
| 5 Upper Green River                     | Limited 1                                  |                     |         |     |      |       |                   |                  |                |                                       |
|                                         | Resident                                   | 25                  | 22      | 0   | 0    | 22    | 88.00%            | 9.45             | 208            | 25                                    |
|                                         | Nonresident                                | 6                   | 5       | 0   | 0    | 5     | 83.33%            | 5.80             | 29             | 6                                     |
|                                         | Limited 2                                  |                     |         |     |      |       |                   |                  |                |                                       |
|                                         | Resident                                   | 12                  | 0       | 5   | 2    | 7     | 58.33%            | 8.10             | 57             | 12                                    |
|                                         | Nonresident                                | 2                   | 0       | 2   | 0    | 2     | 100.00%           | 10.00            | 20             | 3                                     |
|                                         | Area Total                                 | 45                  | 27      | 7   | 2    | 36    | 80.00%            | 8.71             | 314            | 46                                    |
| 6 Wind River                            | Limited 1                                  |                     |         |     |      |       |                   |                  |                |                                       |
|                                         | Resident                                   | 8                   | 7       | 0   | 0    | 7     | 87.50%            | 9.33             | 65             | 8                                     |
|                                         | Nonresident                                | 2                   | 0       | 0   | 0    | 0     | 0.00%             | -                | 14             | 2                                     |
|                                         | Limited 3                                  |                     |         |     |      |       |                   |                  |                |                                       |
|                                         | Resident                                   | 4                   | 4       | 0   | 0    | 4     | 100.00%           | 6.50             | 26             | 4                                     |
|                                         | Nonresident                                | 0                   | 0       | 0   | 0    | 0     | 0.00%             | -                | 0              | 1                                     |
|                                         | Area Total                                 | 14                  | 11      | 0   | 0    | 11    | 78.57%            | 9.58             | 105            | 15                                    |
| 7 Buffalo River                         | Limited 1                                  |                     |         |     |      |       |                   |                  |                |                                       |
|                                         | Resident                                   | 4                   | 3       | 0   | 0    | 3     | 75.00%            | 12.67            | 38             | 4                                     |
|                                         | Nonresident                                | 1                   | 1       | 0   | 0    | 1     | 100.00%           | 1.00             | 1              | 1                                     |
|                                         | Area Total                                 | 5                   | 4       | 0   | 0    | 4     | 80.00%            | 9.75             | 39             | 5                                     |
| 8 Thorofare/Yellowstone                 | CLOSED                                     |                     |         |     |      |       |                   |                  |                |                                       |
| 9 Greybull-Owl Creek                    | Limited 1                                  |                     |         |     |      |       |                   |                  |                |                                       |
|                                         | Resident                                   | 4                   | 4       | 0   | 0    | 4     | 100.00%           | 7.00             | 28             | 4                                     |
|                                         | Nonresident                                | 1                   | 1       | 0   | 0    | 1     | 100.00%           | 4.00             | 4              | 1                                     |
|                                         | Area Total                                 | 5                   | 5       | 0   | 0    | 5     | 100.00%           | 6.40             | 32             | 5                                     |
| 10 South Hoback                         | Limited 1                                  |                     |         |     |      |       |                   |                  |                |                                       |
|                                         | Resident                                   | 12                  | 12      | 0   | 0    | 12    | 100.00%           | 6.00             | 72             | 12                                    |
|                                         | Nonresident                                | 3                   | 3       | 0   | 0    | 3     | 100.00%           | 6.00             | 18             | 3                                     |
|                                         | Limited 2                                  |                     |         |     |      |       |                   |                  |                |                                       |
|                                         | Resident                                   | 5                   | 0       | 3   | 0    | 3     | 60.00%            | 10.56            | 32             | 5                                     |
|                                         | Area Total                                 | 20                  | 15      | 3   | 0    | 18    | 90.00%            | 6.76             | 122            | 20                                    |
| 11 North Fork<br>(12, 13, 31)           | Limited 1                                  |                     |         |     |      |       |                   |                  |                |                                       |
|                                         | Resident                                   | 3                   | 3       | 0   | 0    | 3     | 100.00%           | 9.00             | 27             | 3                                     |
|                                         | Area Total                                 | 3                   | 3       | 0   | 0    | 3     | 100.00%           | 9.00             | 27             | 3                                     |
| 12 Sunlight<br>(11, 13, 31)             | ALL LICENSES EXERCISED IN CROSS HUNT AREAS |                     |         |     |      |       |                   |                  |                |                                       |
| 13 Crandall - Beartooth<br>(11, 12, 31) | Limited 1                                  |                     |         |     |      |       |                   |                  |                |                                       |
|                                         | Resident                                   | 1                   | 1       | 0   | 0    | 1     | 100.00%           | 1.00             | 1              | 1                                     |
|                                         | Area Total                                 | 1                   | 1       | 0   | 0    | 1     | 100.00%           | 1.00             | 1              | 1                                     |
| 14 Fox Park                             | Limited 1                                  |                     |         |     |      |       |                   |                  |                |                                       |
|                                         | Resident                                   | 1                   | 1       | 0   | 0    | 1     | 100.00%           | 12.00            | 12             | 1                                     |
|                                         | Nonresident                                | 1                   | 0       | 0   | 0    | 0     | 0.00%             | -                | 9              | 1                                     |
|                                         | Area Total                                 | 2                   | 1       | 0   | 0    | 1     | 50.00%            | 21.00            | 21             | 2                                     |
| 15 Glade Creek-Pilgrim Creek            | Limited 1                                  |                     |         |     |      |       |                   |                  |                |                                       |
|                                         | Resident                                   | 5                   | 5       | 0   | 0    | 5     | 100.00%           | 10.50            | 53             | 5                                     |
|                                         | Area Total                                 | 5                   | 5       | 0   | 0    | 5     | 100.00%           | 10.50            | 53             | 5                                     |





TABLE I  
MOOSE  
HARVEST BY HUNT AREA  
2007

| AREA<br>(cross hunt areas)    | TYPE        | ACTIVE<br>LICS/HTRS | HARVEST |     |      |       | HUNTER<br>SUCCESS | DAYS/<br>HARVEST | HUNTER<br>DAYS | LICENSES<br>SOLD |
|-------------------------------|-------------|---------------------|---------|-----|------|-------|-------------------|------------------|----------------|------------------|
|                               |             |                     | BULL    | COW | CALF | TOTAL |                   |                  |                |                  |
| 27 Uinta                      | Limited 1   |                     |         |     |      |       |                   |                  |                |                  |
|                               | Resident    | 24                  | 23      | 0   | 0    | 23    | 95.83%            | 9.80             | 225            | 24               |
|                               | Nonresident | 6                   | 4       | 0   | 0    | 4     | 66.67%            | 17.50            | 70             | 6                |
|                               | Limited 2   |                     |         |     |      |       |                   |                  |                |                  |
|                               | Resident    | 30                  | 0       | 20  | 6    | 26    | 86.67%            | 7.27             | 189            | 30               |
| 28 Crystal Creek - Flat Creek | Area Total  | 60                  | 27      | 20  | 6    | 53    | 88.33%            | 9.14             | 484            | 60               |
|                               | Limited 1   |                     |         |     |      |       |                   |                  |                |                  |
|                               | Resident    | 4                   | 4       | 0   | 0    | 4     | 100.00%           | 4.75             | 19             | 4                |
|                               | Nonresident | 1                   | 1       | 0   | 0    | 1     | 100.00%           | 6.00             | 6              | 1                |
|                               | Area Total  | 5                   | 5       | 0   | 0    | 5     | 100.00%           | 5.00             | 25             | 5                |
| 30 Sweetwater                 | Limited 1   |                     |         |     |      |       |                   |                  |                |                  |
|                               | Resident    | 4                   | 4       | 0   | 0    | 4     | 100.00%           | 1.00             | 4              | 4                |
|                               | Nonresident | 1                   | 1       | 0   | 0    | 1     | 100.00%           | 9.00             | 9              | 1                |
|                               | Area Total  | 5                   | 5       | 0   | 0    | 5     | 100.00%           | 2.60             | 13             | 5                |
| 31 South Fork<br>(11, 12, 13) | Limited 1   |                     |         |     |      |       |                   |                  |                |                  |
|                               | Nonresident | 1                   | 1       | 0   | 0    | 1     | 100.00%           | 21.00            | 21             | 1                |
|                               | Area Total  | 1                   | 1       | 0   | 0    | 1     | 100.00%           | 21.00            | 21             | 1                |
| 32 Enos Lake                  | Limited 1   |                     |         |     |      |       |                   |                  |                |                  |
|                               | Resident    | 3                   | 3       | 0   | 0    | 3     | 100.00%           | 12.00            | 36             | 3                |
|                               | Area Total  | 3                   | 3       | 0   | 0    | 3     | 100.00%           | 12.00            | 36             | 3                |
| 33 Lower Green River          | CLOSED      |                     |         |     |      |       |                   |                  |                |                  |
| 34 Hunter Mesa                | Limited 1   |                     |         |     |      |       |                   |                  |                |                  |
|                               | Resident    | 12                  | 11      | 0   | 1    | 12    | 100.00%           | 5.42             | 65             | 12               |
|                               | Nonresident | 3                   | 3       | 0   | 0    | 3     | 100.00%           | 1.67             | 5              | 3                |
|                               | Limited 2   |                     |         |     |      |       |                   |                  |                |                  |
|                               | Resident    | 20                  | 1       | 14  | 1    | 16    | 80.00%            | 3.88             | 62             | 20               |
| 35 Henry's Fork               | Area Total  | 35                  | 15      | 14  | 2    | 31    | 88.57%            | 4.26             | 132            | 35               |
|                               | Limited 1   |                     |         |     |      |       |                   |                  |                |                  |
|                               | Resident    | 8                   | 7       | 0   | 0    | 7     | 87.50%            | 10.12            | 71             | 8                |
|                               | Nonresident | 2                   | 2       | 0   | 0    | 2     | 100.00%           | 3.50             | 7              | 2                |
|                               | Limited 2   |                     |         |     |      |       |                   |                  |                |                  |
| 36 Bear River Divide          | Resident    | 8                   | 0       | 3   | 0    | 3     | 37.50%            | 16.00            | 48             | 8                |
|                               | Nonresident | 1                   | 0       | 0   | 0    | 0     | 0.00%             | -                | 4              | 1                |
|                               | Area Total  | 19                  | 9       | 3   | 0    | 12    | 63.16%            | 10.82            | 130            | 19               |
|                               | Limited 1   |                     |         |     |      |       |                   |                  |                |                  |
|                               | Resident    | 8                   | 8       | 0   | 0    | 8     | 100.00%           | 6.43             | 51             | 8                |
| 37 Grassy Lake                | Nonresident | 2                   | 2       | 0   | 0    | 2     | 100.00%           | 2.00             | 4              | 2                |
|                               | Area Total  | 10                  | 10      | 0   | 0    | 10    | 100.00%           | 5.54             | 55             | 10               |
|                               | Limited 1   |                     |         |     |      |       |                   |                  |                |                  |
|                               | Resident    | 11                  | 8       | 0   | 0    | 8     | 72.73%            | 12.90            | 103            | 12               |
|                               | Nonresident | 3                   | 3       | 0   | 0    | 3     | 100.00%           | 14.33            | 43             | 3                |
| 38 Snowy Range                | Area Total  | 14                  | 11      | 0   | 0    | 11    | 78.57%            | 13.29            | 146            | 15               |
|                               | Limited 1   |                     |         |     |      |       |                   |                  |                |                  |
|                               | Resident    | 12                  | 12      | 0   | 0    | 12    | 100.00%           | 4.20             | 50             | 12               |
|                               | Nonresident | 3                   | 3       | 0   | 0    | 3     | 100.00%           | 3.67             | 11             | 3                |
|                               | Limited 2   |                     |         |     |      |       |                   |                  |                |                  |
| 39 Jeffrey City               | Resident    | 24                  | 0       | 21  | 2    | 23    | 95.83%            | 3.37             | 77             | 24               |
|                               | Nonresident | 1                   | 0       | 1   | 0    | 1     | 100.00%           | 12.00            | 12             | 1                |
|                               | Area Total  | 40                  | 15      | 22  | 2    | 39    | 97.50%            | 3.87             | 151            | 40               |
|                               | CLOSED      |                     |         |     |      |       |                   |                  |                |                  |
| 40 Lower Hams Fork            | Limited 1   |                     |         |     |      |       |                   |                  |                |                  |
|                               | Resident    | 3                   | 2       | 0   | 0    | 2     | 66.67%            | 6.75             | 14             | 3                |
|                               | Nonresident | 1                   | 1       | 0   | 0    | 1     | 100.00%           | 3.00             | 3              | 1                |
|                               | Area Total  | 4                   | 3       | 0   | 0    | 3     | 75.00%            | 5.50             | 17             | 4                |
| 42 Shell                      | Limited 1   |                     |         |     |      |       |                   |                  |                |                  |
|                               | Resident    | 4                   | 4       | 0   | 0    | 4     | 100.00%           | 14.50            | 58             | 4                |
|                               | Nonresident | 1                   | 0       | 0   | 0    | 0     | 0.00%             | -                | 15             | 1                |
|                               | Area Total  | 5                   | 4       | 0   | 0    | 4     | 80.00%            | 18.25            | 73             | 5                |
| 43 Ten Sleep                  | Limited 1   |                     |         |     |      |       |                   |                  |                |                  |
|                               | Resident    | 4                   | 4       | 0   | 0    | 4     | 100.00%           | 6.00             | 24             | 4                |
|                               | Nonresident | 1                   | 0       | 0   | 0    | 0     | 0.00%             | 0.00             | 5              | 1                |
|                               | Area Total  | 5                   | 4       | 0   | 0    | 4     | 80.00%            | 7.25             | 29             | 5                |
| 44 East Flaming Gorge         | Limited 1   |                     |         |     |      |       |                   |                  |                |                  |
|                               | Resident    | 3                   | 2       | 0   | 0    | 2     | 66.67%            | 20.00            | 40             | 4                |
|                               | Nonresident | 1                   | 1       | 0   | 0    | 1     | 100.00%           | 3.00             | 3              | 1                |
|                               | Area Total  | 4                   | 3       | 0   | 0    | 3     | 75.00%            | 14.33            | 43             | 5                |

TABLE II  
**MOOSE**  
HARVEST BY HERD UNIT  
**2007**

| HERD UNIT               | TYPE        | ACTIVE<br>LICS/HTRS | HARVEST |     |      |       | HUNTER<br>SUCCESS | DAYS/<br>HARVEST | HUNTER<br>DAYS | LICENSES<br>SOLD |
|-------------------------|-------------|---------------------|---------|-----|------|-------|-------------------|------------------|----------------|------------------|
|                         |             |                     | BULL    | COW | CALF | TOTAL |                   |                  |                |                  |
| 101 Targhee             | Resident    | 27                  | 23      | 0   | 0    | 23    | 85.19%            | 9.75             | 224            | 28               |
|                         | Nonresident | 8                   | 8       | 0   | 0    | 8     | 100.00%           | 8.38             | 67             | 8                |
|                         | Total       | 35                  | 31      | 0   | 0    | 31    | 88.57%            | 9.40             | 291            | 36               |
| 103 Jackson             | Resident    | 59                  | 55      | 0   | 0    | 55    | 93.22%            | 8.48             | 466            | 59               |
|                         | Nonresident | 13                  | 11      | 0   | 0    | 11    | 84.62%            | 8.36             | 92             | 13               |
|                         | Total       | 72                  | 66      | 0   | 0    | 66    | 91.67%            | 8.46             | 558            | 72               |
| 105 Sublette            | Resident    | 246                 | 167     | 41  | 8    | 216   | 87.80%            | 7.04             | 1521           | 250              |
|                         | Nonresident | 52                  | 42      | 7   | 0    | 49    | 94.23%            | 4.38             | 215            | 54               |
|                         | Total       | 298                 | 209     | 48  | 8    | 265   | 88.93%            | 6.55             | 1736           | 304              |
| 207 Clark's Fork        | Resident    | 1                   | 1       | 0   | 0    | 1     | 100.00%           | 1.00             | 1              | 1                |
|                         | Total       | 1                   | 1       | 0   | 0    | 1     | 100.00%           | 1.00             | 1              | 1                |
| 210 North Fork/Shoshone | Resident    | 3                   | 3       | 0   | 0    | 3     | 100.00%           | 9.00             | 27             | 3                |
|                         | Nonresident | 1                   | 1       | 0   | 0    | 1     | 100.00%           | 21.00            | 21             | 1                |
|                         | Total       | 4                   | 4       | 0   | 0    | 4     | 100               | 12               | 48             | 4                |
| 212 Gooseberry          | Resident    | 4                   | 4       | 0   | 0    | 4     | 100.00%           | 7.00             | 28             | 4                |
|                         | Nonresident | 1                   | 1       | 0   | 0    | 1     | 100.00%           | 4.00             | 4              | 1                |
|                         | Total       | 5                   | 5       | 0   | 0    | 5     | 100               | 6                | 32             | 5                |
| 313 Gooseberry          | Resident    | 76                  | 33      | 33  | 2    | 68    | 89.47%            | 6.54             | 445            | 76               |
|                         | Nonresident | 14                  | 12      | 0   | 0    | 12    | 85.71%            | 5.33             | 64             | 14               |
|                         | Total       | 90                  | 45      | 33  | 2    | 80    | 88.89%            | 6.36             | 509            | 90               |
| 415 Uinta               | Resident    | 73                  | 32      | 23  | 6    | 61    | 83.56%            | 9.40             | 573            | 74               |
|                         | Nonresident | 10                  | 7       | 0   | 0    | 7     | 70.00%            | 2.00             | 84             | 10               |
|                         | Total       | 83                  | 39      | 23  | 6    | 68    | 81.93%            | 9.66             | 657            | 84               |
| 417 Lincoln             | Resident    | 71                  | 46      | 17  | 1    | 64    | 90.14%            | 6.12             | 392            | 71               |
|                         | Nonresident | 17                  | 12      | 3   | 1    | 16    | 94.12%            | 5.82             | 93             | 17               |
|                         | Total       | 88                  | 58      | 20  | 2    | 80    | 90.91%            | 6.06             | 485            | 88               |
| 419 Bear River Divide   | Resident    | 8                   | 8       | 0   | 0    | 8     | 100.00%           | 6.43             | 51             | 8                |
|                         | Nonresident | 2                   | 2       | 0   | 0    | 2     | 100.00%           | 2.00             | 4              | 2                |
|                         | Total       | 10                  | 10      | 0   | 0    | 10    | 100.00%           | 5.54             | 55             | 10               |
| 545 Snowy Range         | Resident    | 36                  | 12      | 21  | 2    | 35    | 97.22%            | 3.65             | 128            | 36               |
|                         | Nonresident | 4                   | 3       | 1   | 0    | 4     | 100.00%           | 5.75             | 23             | 4                |
|                         | Total       | 40                  | 15      | 22  | 2    | 39    | 97.50%            | 3.87             | 151            | 40               |
| 620 Lander              | Resident    | 8                   | 7       | 0   | 0    | 7     | 87.50%            | 5.00             | 35             | 8                |
|                         | Nonresident | 2                   | 2       | 0   | 0    | 2     | 100.00%           | 5.00             | 10             | 2                |
|                         | Total       | 10                  | 9       | 0   | 0    | 9     | 90.00%            | 5.00             | 45             | 10               |
| 621 Dubois              | Resident    | 12                  | 11      | 0   | 0    | 11    | 91.67%            | 8.30             | 91             | 12               |
|                         | Nonresident | 2                   | 0       | 0   | 0    | 0     | 0.00%             | 0.00             | 14             | 3                |
|                         | Total       | 14                  | 11      | 0   | 0    | 11    | 78.57%            | 9.58             | 105            | 15               |

# WYOMING GAME AND FISH COMMISSION

## CHAPTER 8

### MOOSE HUNTING SEASONS

Section 1. Authority. This regulation is promulgated by authority of W.S. §23-1-302, §23-1-703 and §23-2-104.

Section 2. Hunting Seasons Established. There shall be open seasons during 2007 for the hunting of moose as set forth in this Chapter and in accordance with Chapter 2, General Hunting Regulation.

Section 3. Regular Hunting Seasons.

(a) Hunt areas, season dates and limitations.

| Hunt Area      | Type | Date of Season |         | Limitations                                                                                                 |
|----------------|------|----------------|---------|-------------------------------------------------------------------------------------------------------------|
|                |      | Opens          | Closes  |                                                                                                             |
| 1              | 1    | Oct. 1         | Oct. 14 | Limited quota; 20 licenses any moose, except cow moose with calf at side                                    |
|                | 2    | Oct. 1         | Oct. 14 | Limited quota; 20 licenses antlerless moose, except cow moose with calf at side                             |
| 2              | 1    | Oct. 1         | Nov. 15 | Limited quota; 5 licenses antlered moose                                                                    |
| 3              | 1    | Sept. 20       | Oct. 31 | Limited quota; 5 licenses antlered moose                                                                    |
| 4              | 1    | Sept. 20       | Oct. 31 | Limited quota; 15 licenses antlered moose                                                                   |
|                | 2    | Sept. 20       | Oct. 31 | Limited quota; 5 licenses antlerless moose, except cow moose with calf at side                              |
| 5              | 1    | Oct. 1         | Oct. 31 | Limited quota; 30 licenses antlered moose                                                                   |
|                | 2    | Oct. 1         | Oct. 31 | Limited quota; 15 licenses antlerless moose, except cow moose with calf at side                             |
| 6              | 1    | Oct. 1         | Nov. 20 | Limited quota; 10 licenses antlered moose                                                                   |
|                | 3    | Sept. 15       | Oct. 31 | Limited quota; 5 licenses antlered moose, valid in that portion of Area 6 within the Fitzpatrick Wilderness |
| 7, 14, 32      | 1    | Sept. 10       | Oct. 31 | Limited quota; 10 licenses antlered moose                                                                   |
| 8              |      |                |         | CLOSED                                                                                                      |
| 9              | 1    | Oct. 1         | Oct. 31 | Limited quota; 5 licenses antlered moose                                                                    |
| 10             | 1    | Sept. 10       | Oct. 31 | Limited quota; 15 licenses antlered moose                                                                   |
|                | 2    | Sept. 10       | Oct. 31 | Limited quota; 5 licenses antlerless moose, except cow moose with calf at side                              |
| 11, 12, 13, 31 | 1    | Sept. 10       | Nov. 10 | Limited quota; 5 licenses antlered moose                                                                    |
| 15             | 1    | Sept. 10       | Oct. 31 | Limited quota; 5 licenses antlered moose                                                                    |
| 16             | 1    | Sept. 10       | Nov. 15 | Limited quota; 20 licenses antlered moose                                                                   |
| 17             | 1    | Sept. 10       | Oct. 31 | Limited quota; 25 licenses antlered moose                                                                   |
| 18             | 1    | Oct. 1         | Oct. 31 | Limited quota; 25 licenses antlered moose                                                                   |
| 19             |      |                |         | CLOSED                                                                                                      |
| 20             | 1    | Sept. 10       | Oct. 31 | Limited quota; 30 licenses antlered moose                                                                   |
|                | 2    | Sept. 10       | Oct. 31 | Limited quota; 5 licenses antlerless moose, except cow moose with calf at side                              |
| 21             | 1    | Sept. 10       | Oct. 31 | Limited quota; 10 licenses antlered moose                                                                   |

| Hunt Area | Type | Date of Season |         | Limitations                                                                     |
|-----------|------|----------------|---------|---------------------------------------------------------------------------------|
|           |      | Opens          | Closes  |                                                                                 |
|           | 2    | Sept. 10       | Oct. 31 | Limited quota; 5 licenses antlerless moose, except cow moose with calf at side  |
| 22        | 1    | Oct. 1         | Oct. 31 | Limited quota; 15 licenses antlered moose                                       |
|           | 2    | Oct. 1         | Oct. 31 | Limited quota; 5 licenses antlerless moose, except cow moose with calf at side  |
| 23        | 1    | Sept. 15       | Oct. 31 | Limited quota; 35 licenses antlered moose                                       |
|           | 2    | Sept. 15       | Oct. 31 | Limited quota; 5 licenses antlerless moose, except cow moose with calf at side  |
| 24        | 1    | Oct. 1         | Oct. 31 | Limited quota; 30 licenses antlered moose                                       |
|           | 2    | Oct. 1         | Oct. 31 | Limited quota; 5 licenses antlerless moose, except cow moose with calf at side  |
| 25        | 1    | Oct. 1         | Oct. 31 | Limited quota; 45 licenses antlered moose                                       |
|           | 2    | Oct. 1         | Oct. 31 | Limited quota; 25 licenses antlerless moose, except cow moose with calf at side |
| 26        | 1    | Oct. 1         | Oct. 31 | Limited quota; 60 licenses antlered moose                                       |
|           | 2    | Oct. 1         | Oct. 31 | Limited quota; 25 licenses antlerless moose, except cow moose with calf at side |
| 27        | 1    | Oct. 1         | Nov. 15 | Limited quota; 30 licenses antlered moose                                       |
|           | 2    | Oct. 1         | Oct. 31 | Limited quota; 30 licenses antlerless moose, except cow moose with calf at side |
| 28        | 1    | Sept. 10       | Oct. 31 | Limited quota; 5 licenses antlered moose                                        |
| 30        | 1    | Oct. 1         | Nov. 15 | Limited quota; 5 licenses antlered moose                                        |
| 33        |      |                |         | CLOSED                                                                          |
| 34        | 1    | Oct. 1         | Oct. 14 | Limited quota; 15 licenses any moose, except cow moose with calf at side        |
|           | 2    | Oct. 1         | Oct. 14 | Limited quota; 20 licenses antlerless moose, except cow moose with calf at side |
| 35        | 1    | Oct. 1         | Nov. 15 | Limited quota; 10 licenses any moose, except cow moose with calf at side        |
|           | 2    | Oct. 1         | Oct. 31 | Limited quota; 10 licenses antlerless moose, except cow moose with calf at side |
| 36        | 1    | Oct. 1         | Oct. 31 | Limited quota; 10 licenses any moose, except cow moose with calf at side        |
| 37        | 1    | Sept. 10       | Nov. 15 | Limited quota; 15 licenses antlered moose                                       |
| 38, 41    | 1    | Oct. 1         | Oct. 31 | Limited quota; 15 licenses any moose, except cow moose with calf at side        |
|           | 2    | Oct. 1         | Oct. 31 | Limited quota; 25 licenses antlerless moose, except cow moose with calf at side |
| 39        |      |                |         | CLOSED                                                                          |
| 40        | 1    | Oct. 1         | Oct. 31 | Limited quota; 5 licenses any moose, except cow moose with calf at side         |
| 42        | 1    | Oct. 1         | Oct. 14 | Limited quota; 5 licenses any moose, except cow moose with calf at side         |
| 43        | 1    | Oct. 1         | Oct. 14 | Limited quota; 5 licenses any moose, except cow moose with calf at side         |
| 44        | 1    | Oct. 1         | Nov. 30 | Limited quota; 5 licenses any moose, except cow moose with calf at side         |

Section 4. Special Archery Seasons. Hunt areas listed in this section shall have special archery hunting seasons during the dates and with limitations specified in this section. Archers shall possess a limited quota moose license in addition to an archery license in order to hunt moose during any special archery season. Archers shall hunt only in the hunt area and for the type of moose set forth by the limitations of their license as specified in Section 3 of this Chapter.

| Hunt Area(s)                                       | Dates of Seasons |          | Limitations                        |
|----------------------------------------------------|------------------|----------|------------------------------------|
|                                                    | Opens            | Closes   |                                    |
| 1, 6, 34, 42, 43                                   | Sept. 15         | Sept. 30 | Refer to Section 3 of this Chapter |
| 2, 5, 9, 18, 22, 24-27, 30, 35, 36, 38, 40, 41, 44 | Sept. 1          | Sept. 30 | Refer to Section 3 of this Chapter |
| 3, 4                                               | Sept. 1          | Sept. 19 | Refer to Section 3 of this Chapter |
| 7, 10-17, 20, 21, 28, 31, 32, 37                   | Sept. 1          | Sept. 9  | Refer to Section 3 of this Chapter |
| 23                                                 | Sept. 1          | Sept. 14 | Refer to Section 3 of this Chapter |

Section 5. Hunt Area Descriptions.

(a) Area and Number

Area 1. Goose Creek. Beginning where Interstate Highway 90 crosses the Wyoming-Montana state line; southeasterly along said highway to Piney Creek; northwesterly up said creek to South Piney Creek; southwesterly up said creek to the divide along the Big Horn Mountain range; northwesterly along said divide to the Wyoming-Montana state line; easterly along said line to Interstate Highway 90.

Area 2. Lander Area. Beginning where U.S. Highway 287 intersects the south boundary of the Wind River Indian Reservation; easterly along said boundary to Wyoming Highway 135 (Sand Draw Road); southerly along said highway to U.S. Highway 287; easterly along said highway to the Bison Basin Road (BLM Road 3221); southerly along said road to the Cyclone Ridge Road (BLM Road 3216); westerly along said road to the Red Creek Road (BLM Road 3219); northwesterly along said road to the Sand Creek Road; westerly along said road to the Continental Divide Road north of Continental Peak; westerly along said road to the Oregon Buttes Road; northerly along said road to Wyoming Highway 28; northeasterly along said highway to Willow Creek; northwesterly up said creek to the divide between the Sweetwater River and the Wind River at Granite Peak; northwesterly along said divide to the Continental Divide; northwesterly along said divide to the Wind River Indian Reservation boundary; easterly along said boundary to U.S. Highway 287.

Area 3. Pinedale-Sandy. Beginning where Pine Creek crosses the Bridger-Teton National Forest boundary below Fremont Lake; northerly up said creek to Summit Lake; easterly to Mt. Helen and the Continental Divide; southerly along said divide to the head of the Big Sandy River; southwesterly down said river to the Bridger-Teton National Forest boundary; northerly along said boundary to Pine Creek.

Area 4. Pinedale-Off National Forest. Beginning where the Big Sandy River crosses the Bridger-Teton National Forest boundary; southwesterly down said river to the Erramouspe Ranch Road; westerly along said road to U.S. Highway 191; northerly along said highway to Wyoming Highway 351; westerly along said highway to the East Green River Road (Sublette County Road 23-110); northerly along said road to U.S. Highway 191; northwesterly along said highway to the Green River; northeasterly up said river to Jim Creek; easterly up said creek to the Bridger-Teton National Forest boundary; southeasterly along said boundary to the Big Sandy River.

Area 5. Upper Green River. Beginning where U.S. Highway 191 crosses the Green River at Warren Bridge; northwesterly along said highway to the divide between the Hoback River and the Green River (Hoback Rim); northerly along said divide to the divide between the Green River and the Gro Ventre River at Hodges Peak; northeasterly along said divide to the Darwin Ranch Road (USFS Road 620); easterly along said road to the Union Pass Road (USFS Road 600); northeasterly along said road to the Continental Divide; southerly along said divide to Mt. Helen; west to Summit Lake and Pine Creek; southerly down said creek to the Bridger-Teton National Forest

boundary; northwesterly along said boundary to Jim Creek; westerly down said creek to the Green River; southerly down said river to U.S. Highway 191.

Area 6. Wind River. All of the drainage of the Wind River west of the west boundary of the Wind River Indian Reservation and those areas of the Spence and Moriarity Wildlife Management Area east of the East Fork of the Wind River.

Area 7. Buffalo River. Beginning at the confluence of the South Fork and the North Fork of the Buffalo River; northerly up the North Fork to the Trail Creek Trail; northerly along said trail to Pacific Creek; easterly along said creek to the Continental Divide; easterly and southerly along said divide to the Teton Wilderness boundary and the divide between Blackrock Creek and the South Fork of the Buffalo River; westerly along said divide to Togwotee Lodge; northerly along the South Fork of the Buffalo River-Togwotee Lodge Trail to the South Fork of the Buffalo River; westerly down said river to the North Fork of the Buffalo River.

Area 8. Thorofare-Yellowstone. All of the drainages of Mountain Creek, the Thorofare River and the Yellowstone River upstream from the Yellowstone National Park boundary.

Area 9. Greybull-Owl Creek. Beginning where Wyoming Highway 120 crosses the divide between Dry Creek and the Greybull River drainage (Meeteetse Rim); southeasterly along said highway to the Bighorn River; southerly up said river to the Wind River Indian Reservation boundary; westerly along said boundary to the divide between the Wood River and the Wind River; northwesterly along said divide to the divide between the Greybull River and the Wind River; northwesterly along said divide to the divide between the Greybull River and the South Fork of the Shoshone River; northeasterly along said divide to the divide between Meeteetse Creek and Sage Creek; easterly along said divide to the divide between Dry Creek and the Greybull River; easterly along said divide to Wyoming Highway 120; in addition, all non-Indian fee title lands in that portion of Hot Springs County within the exterior boundaries of the Wind River Indian Reservation.

Area 10. South Hoback. Beginning at the confluence of the Hoback and Snake rivers; southeasterly up the Hoback River to the South Fork of the Hoback River; east to Hoback Rim and the divide between the Green River and Hoback River; southwesterly along said divide to the divide between the Greys River and the Hoback River; northerly along said divide to the divide between the Greys River and Willow Creek; northerly along said divide to the divide between Bailey Creek and Willow Creek; northerly along said divide to Drywash Draw; westerly down said draw to Bailey Creek; northwesterly down said creek to the Snake River; northerly up said river to the confluence of the Hoback and Snake rivers.

Area 11. North Fork. All of the drainage of the North Fork of the Shoshone River; all of the north drainage of the Shoshone River located west of Wyoming Highway 120.

Area 12. Sunlight. All of the south drainage of the Clark's Fork River west of Wyoming Highway 120 up to and including the drainage of Russell Creek.

Area 13. Crandall-Beartooth. All of the north drainage of the Clark's Fork River; all of the south drainage of the Clark's Fork River above the drainage of Russell Creek; all of the drainage of Soda Butte Creek outside of Yellowstone National Park.

Area 14. Fox Park. Beginning at the head of the Pacific Creek at the Continental Divide; westerly down Pacific Creek to the Whetstone Creek-Wildcat Peak Trail (#3034); northerly and westerly along said trail to Wildcat Ridge and the West Pilgrim Creek Trail; northerly along said trail to Brown Meadows and the Arizona Creek-Sheffield Creek Trail (#3026); northerly along said trail to Huckleberry Ridge and the divide between Sheffield Creek and Rodent Creek; northerly along said divide to the Yellowstone National Park boundary; easterly along said boundary to the Continental Divide; southerly along said divide to the head of Pacific Creek.

Area 15. Glade Creek-Pilgrim Creek. Beginning where Pacific Creek crosses the Grand Teton National Park boundary; northerly and westerly along said boundary to the Targhee National Forest boundary; northerly along said boundary to the Yellowstone National Park boundary; easterly along said boundary to Huckleberry Ridge; southerly along said ridge to the Sheffield Creek-Arizona Creek Trail (#3026); southerly along said trail to

Brown Meadows and the West Pilgrim Creek Trail; southerly along said trail to Wildcat Ridge and the Wildcat Peak-Whetstone Creek Trail (#3034); southerly and easterly along said trail to Pacific Creek; southwesterly down said creek to the Grand Teton National Park boundary.

Area 16. Alta. Beginning at the intersection of Wyoming Highway 22 and the Wyoming-Idaho state line; northerly along said line to the South Fork of Badger Creek; easterly up said creek to the Targhee National Forest-Grand Teton National Park boundary; southerly along said boundary to the Targhee/Bridger-Teton interforest boundary; southerly along said boundary to Wyoming Highway 22; westerly along said highway to the Wyoming-Idaho state line.

Area 17. Lower Gros Ventre-Spread Creek. Beginning where the Gros Ventre River crosses the Grand Teton National Park boundary; northerly along said boundary to U.S. Highway 26-287; easterly along said highway to Togwotee Lodge and the divide between the Buffalo River and Blackrock Creek; easterly along said divide and the Teton Wilderness boundary to the Continental Divide; southerly along said divide to the Moccasin Basin Road (U.S.F.S. Road 30750); southerly along said road to the North Fork of Fish Creek at Calf Creek; southerly down said creek to Fish Creek; westerly down said creek to the Gros Ventre River; westerly down said river to the Grand Teton National Park boundary.

Area 18. Fish Creek. Beginning at the confluence of the Gros Ventre River and Fish Creek; northeasterly up said creek to North Fork of Fish Creek; northerly up said creek to the Moccasin Basin Road (U.S.F.S. Road 30750) at Calf Creek; northerly up said road to the Continental Divide; southeasterly along said divide to the Union Pass Road (USFS Road 600); southwesterly along said road to the Darwin Ranch Road (USFS Road 620); westerly along said road to Kinky Creek; northwesterly down said creek to the Gros Ventre River; northwesterly down said river to Fish Creek.

Area 19. Wilson. Beginning at the junction of Wyoming Highway 22 and Wyoming Highway 390 west of the Snake River; northerly along Wyoming Highway 390 to the Grand Teton National Park boundary; northerly, easterly and southerly along said boundary to U.S. Highway 191; southerly along said highway to Wyoming Highway 22; westerly along said highway to Wyoming Highway 390.

Area 20. Fall Creek-Targhee. Beginning at the junction of Wyoming Highway 22 and Wyoming Highway 390 west of the Snake River; easterly along Wyoming Highway 22 to the Snake River; southerly and westerly down said river to the Wyoming-Idaho state line; northerly along said line to Wyoming Highway 22; easterly along said highway to the Targhee/Bridger-Teton interforest boundary at Teton Pass; northerly along said boundary to the Grand Teton National Park boundary; northeasterly along said boundary to Wyoming Highway 390; southerly along said highway to Wyoming Highway 22.

Area 21. North Hoback. Beginning where U.S. Highway 191 crosses Flat Creek at the north edge of the town of Jackson; due east to the National Elk Refuge boundary; easterly and northerly along said boundary to Flat Creek; easterly and southerly up Flat Creek to Cache Peak; southeasterly along the divide between Flat Creek and Granite Creek to Pyramid Peak; southeasterly along the divide between the Gros Ventre River and the Hoback River to Steamboat Peak; southerly and westerly along the divide between Shoal Creek and Dell Creek to the Riling Draw Road; southerly along said road to the Dell Creek Road; westerly along said road to the Hoback River; westerly down said river to the Snake River; northerly up said river to Wyoming Highway 22; easterly along said highway to U.S. Highway 191; easterly and northerly along said highway to Flat Creek at the north edge of the town of Jackson.

Area 22. Raspberry Ridge. Beginning where U.S. Highway 191 crosses the divide between the Green River and the Hoback River on Hoback Rim; southwesterly along said divide to a point east of the confluence of the South Fork of the Hoback River and the Hoback River; due west to the Hoback River; northerly along said river to the Dell Creek Road; easterly along said road to the Riling Draw Road; northerly along said road to the divide between Shoal Creek and Dell Creek; easterly and northerly along said divide to the divide between the Gros Ventre River and the Hoback River at Steamboat Peak; southeasterly along the divide between the Gros Ventre River and the Hoback River to the divide between the Green River and the Hoback River at Hodges Peak; southerly along the divide between the Green River and the Hoback River to U.S. Highway 191.



Area 23. Greys River-Salt River. Beginning at the confluence of the Greys River and the Snake River; easterly up the Snake River to Bailey Creek; southerly up said creek to Dry Wash Draw; easterly up said draw to Greyback Ridge; southerly along said ridge to the divide between the Little Grays River and the Hoback River; southerly and easterly along said divide to the divide between the Greys River and the Green River; southerly, westerly, and northerly along said divide to the divide between the Greys River and the Smiths Fork River; northerly and westerly along said divide to the divide between the Bear River and the Salt River; westerly along said divide to the Wyoming-Idaho state line; northerly along said line to the Snake River; easterly up said river to the Greys River.

Area 24. Big Piney-On National Forest. Beginning at Deadman Peak and the divide between the Green River and the Hoback River; northeasterly along said divide to the Bridger-Teton National Forest boundary; southerly along said boundary to LaBarge Creek Road (U.S.F.S. Road 10-138); northwesterly along said road to the Smiths Fork Road (U.S.F.S. Road 10-072); northerly along said road to the divide between the Green River and the Greys River; northerly along said divide to Deadman Peak.

Area 25. Big Piney-Off National Forest. Beginning where U.S. Highway 191 crosses the divide between the Green River and the Hoback River (Hoback Rim); southeasterly along said highway to the East Green River Road (Sublette County Road 23-110) at Cora Junction; southerly along said road to Wyoming Highway 351; easterly along said highway to the Burma Road (BLM Road 5406); southerly along said road to the Yellow Point Road (BLM Road 5409); westerly along said road to Colorado Point and the CCC Road (BLM Road 5402); southerly along said road to the Fontenelle Reservoir Dam Road; westerly along said road to the Fontenelle Reservoir Dam (Lincoln County Road 313) on the Green River; northerly up said river to LaBarge Creek; westerly up said creek to U.S. Highway 189; northerly along said highway to the LaBarge Creek Road (Lincoln County Road 315) northwesterly along said road to the forest boundary; northerly up said boundary to the divide between the Green River and the Hoback River; northeasterly along said divide to U.S. Highway 191.

Area 26. Lincoln. Beginning at the town of Kemmerer and U.S. Highway 30; westerly along said highway to Wyoming Highway 89 at Sage Junction; southwestly along said highway to the Wyoming-Utah state line; northerly along said line to the Wyoming-Idaho state line; northerly along said line to the divide between the Salt River and the Bear River; easterly along said divide to the divide between the Salt River and the Smiths Fork; northeasterly along said divide to the divide between the Greys River and the Smiths Fork; southeasterly along said divide to the divide between the Greys River and LaBarge Creek; southeasterly along said divide to the LaBarge Creek Road (U.S.F.S. Road 10-138 and Lincoln County Road 315); southeasterly along said road to U.S. Highway 189; southerly along said highway to LaBarge Creek; easterly down said creek to the Green River; southeasterly down said river to the Fontenelle Reservoir Dam Road (Lincoln County Road 313); westerly along said road to Wyoming Highway 189; southwestly along said road to the town of Kemmerer.

Area 27. Uinta. Beginning where Interstate Highway 80 crosses the Wyoming-Utah state line; easterly along said highway to Wyoming Highway 410; southerly along said highway to the Stateline Dam Road (U.S.F.S. Road 072); southerly along said road to the Wyoming-Utah state line; west then north along said line to Interstate Highway 80.

Area 28. Crystal Creek-Flat Creek. Beginning where the Gros Ventre River crosses the Bridger-Teton National Forest boundary; easterly and southerly up said river to Kinky Creek; southeasterly up said creek to the Darwin Ranch Road (USFS Road 620); easterly along said road to the divide between the Green River and the Gros Ventre River; southwestly along said divide to the divide between the Green River and the Hoback River at Hodges Peak; westerly along said divide to the divide between the Granite Creek-Cache Creek-Flat Creek and the head of Flat Creek; northwesterly down Flat Creek to the Bridger-Teton National Forest boundary; northerly along said boundary to the Gros Ventre River.

Area 30. Sweetwater. Beginning where Wyoming Highway 28 crosses Willow Creek; southwestly along said highway to U.S. Highway 191 at the town of Farson; northerly along said highway to the Big Sandy Reservoir Road (Sweetwater County Road 28); easterly along said road to the Big Sandy River at the dam; northerly up said river to the Continental Divide; southeasterly along said divide to Mt. Nystrom and the divide between the Sweetwater River and the Wind River; southeasterly along said divide to Granite Peak and the headwaters of Willow Creek; southeasterly down said creek to Wyoming Highway 28.

Area 31. South Fork. All of the drainage of the South Fork of the Shoshone River; all of the south drainage of the Shoshone River located west of Wyoming Highway 120; and all of the Dry Creek drainage west of Wyoming Highway 120.

Area 32. Enos Lake. Beginning where Pacific Creek crosses the Grand Teton National Park boundary; easterly and northerly up said creek to Trail Creek and the Trail Creek trail; southerly along said trail to the North Fork of the Buffalo River; southerly down said river to the South Fork of the Buffalo River; easterly up the South Fork to the South Fork of the Buffalo-Togwotee Lodge Trail; southerly along said trail to Togwotee Lodge and U.S. Highway 26-287; westerly along said highway to the Grand Teton National Park boundary; westerly and northerly along said boundary to Pacific Creek.

Area 33. Lower Green River. Beginning at the junction of Interstate Highway 80 and Wyoming Highway 372; northwesterly along Wyoming Highway 372 to Lincoln County Road 316 at the Fontenelle Junction; northerly along said road to the Fontenelle Reservoir Dam Road (Lincoln County Road 313); easterly along said road to the County Line Road (Sweetwater County Road 52); southerly along said road to the Lower Farson Cutoff Road (Sweetwater County Road 8); easterly along said road to Wyoming Highway 28; easterly along said highway to the continuation of the Lower Farson Cutoff Road (Sweetwater County Road 8); southerly along said road to the Blue Rim Road (Sweetwater County Road 5); southerly along said road to Interstate Highway 80; westerly along said highway to Wyoming Highway 372.

Area 34. Hunter Mesa. Beginning at the junction of Piney Creek and Interstate Highway 90; southerly along said highway to Interstate Highway 25; southerly along said highway to the North Fork of the Powder River; northwesterly up said river to Pass Creek; westerly up said creek to the Hazelton Road (Johnson County Road 3); northerly along said road to the Gold Mine Road (U.S.F.S. Road 452); northerly along said road to the Canyon Creek Road (U.S.F.S. Road 25); northerly along said road to U.S. Highway 16; easterly along said highway to the divide along the Big Horn Mountain range at Powder River Pass; northerly along said divide to South Piney Creek; northeasterly down said creek to Piney Creek; southeasterly down said creek to Interstate Highway 90.

Area 35. Henry's Fork. Beginning where Interstate Highway 80 crosses the Green River; southerly along the east bank of said river to Flaming Gorge Reservoir; southerly along the east shore of said reservoir to the Wyoming-Utah state line; westerly along said line to the Stateline Dam Road (U.S.F. S. Road 072); northerly along said road to Wyoming Highway 410; northerly along said highway to Interstate Highway 80; easterly along said highway to the Green River.

Area 36. Bear River Divide. Beginning where Interstate Highway 80 crosses the Wyoming-Utah state line; northerly along said line to Wyoming Highway 89 west of Sage Junction; easterly along said highway to U.S. Highway 189; southerly along said highway to Interstate Highway 80; westerly along said highway to the Wyoming-Utah state line.

Area 37. Grassy Lake. Beginning where the South Fork of Badger Creek crosses the Wyoming-Idaho state line; northerly along said line to the south boundary of Yellowstone National Park; easterly along said boundary to the Targhee National Forest boundary; southerly along said boundary to the Targhee National Forest-Grand Teton National Park boundary; southerly along said boundary to the South Fork of Badger Creek; westerly down said creek to the Wyoming-Idaho state line.

Area 38. Snowy Range. Beginning where Interstate Highway 25 crosses the Wyoming-Colorado state line; westerly along said line to Wyoming Highway 230 west of the North Platte River; northwesterly along said highway to Wyoming Highway 130; northerly along said highway to U.S. Highway 30 at Walcott Junction; easterly and southerly along said highway to the town of Laramie and the Rogers Canyon-Fisher Canyon Road (Albany County Road 17-Laramie County Road 228); easterly along said road to Wyoming Highway 211; southeasterly along said highway to Interstate Highway 25; southerly along said highway to the Wyoming-Colorado state line.

Area 39. Jeffrey City. Beginning at the junction of U.S. Highway 287 and Wyoming Highway 135 (Sand Draw Road); northerly along Wyoming Highway 135 to Beaver Rim; easterly along said rim to the divide between Deer Creek and Dry Creek; northeasterly along said divide to the Dry Creek Road (Natrona County Road 321); southeasterly along said road to Wyoming Highway 220; southwestly along said highway to U.S. Highway 287;

southerly along said highway to Lamont and Wyoming Highway 73; westerly along said highway to the Bairoil Road (Sweetwater County Road 22); westerly along said road to the Wamsutter-Crooks Gap Road (Sweetwater County Road 23); southerly along said road to the Osborne Road (BLM Road 3212); westerly along said road to the Hadsell Road (BLM Road 3217); westerly along said road to the Bison Basin Road (BLM Road 3221); northerly along said road to U.S. Highway 287; westerly along said highway to Wyoming Highway 135 (Sand Draw Road).

Area 40. Lower Hams Fork. Beginning at the town of Kemmerer and U.S. Highway 189; northerly then northeasterly along said highway to Wyoming Highway 372; easterly then southeasterly along said highway to Interstate Highway 80; westerly along said highway to U.S. Highway 189; northerly along said highway to the town of Kemmerer.

Area 41. Sierra Madres. Beginning where Wyoming Highway 230 west of the North Platte River crosses the Wyoming-Colorado state line; westerly along said line to Wyoming Highway 789; northerly along said highway to Interstate Highway 80; easterly along said highway to Wyoming Highway 130; southerly along said highway to Wyoming Highway 230; southeasterly along said highway to the Wyoming-Colorado state line.

Area 42. Shell. Beginning where the Big Horn River crosses the Wyoming-Montana state line; easterly along said line to the divide along the Big Horn Mountain range; southeasterly along said divide to the divide between Medicine Lodge Creek and Paint Rock Creek; southwesterly along said divide to the Cold Springs Road (U.S.F.S. Road 344, becomes BLM Road 268A); southwesterly along said road to the Alkali Road (BLM Road 1111); southerly along said road to Wyoming Highway 31; westerly along said highway to U.S. Highway 16-20; westerly along said highway to the Big Horn River; northerly down said river to the Wyoming-Montana state line.

Area 43. Ten Sleep. Beginning at the intersection of Wyoming Highway 31 and the Alkali Road (BLM Road 1111) just north of Hyattville; northerly along said road to the Cold Springs Road (BLM Road 268A-U.S.F.S. Road 344); northeasterly along said road to the divide between Medicine Lodge Creek and Paint Rock Creek; northeasterly along said divide to the divide along the Bighorn Mountain range; southerly along said divide to U.S. Highway 16 at the Powder River Pass; westerly along highway to the Canyon Creek Road (U.S.F.S. Road 25); southerly along said road to the Gold Mine Road (U.S.F.S. Road 452); southerly along said road to the Hazelton Road (Big Horn Divide Road-Johnson County Road 3); southerly along said road to the Rome Hill Road (Wyoming Highway 436); northwesterly along said road to U.S. Highway 16; westerly along said highway to the Nowood River; northwesterly down said river to Wyoming Highway 31; northeasterly along said highway to the Alkali Road (BLM Road 1111).

Area 44. East Flaming Gorge. Beginning where Interstate Highway 80 crosses the Green River; easterly along said highway to the Bitter Creek Road (Sweetwater County Road 19); southerly along said road to Carson Springs Junction and the Cow Creek-Powder Wash Road; southerly along said road to the Wyoming-Colorado state line; westerly along said line to the Wyoming-Utah state line; westerly along said line to Flaming Gorge Reservoir; northerly along the east shore of said reservoir to the Green River; northerly up the east bank of said river to Interstate Highway 80.

#### WYOMING GAME AND FISH COMMISSION

By:

Bill Williams, DVM, President

Dated: April 24, 2007

**Note:**  Wilderness area, nonresidents must have guides.

**BIGHORN SHEEP  
HARVEST STATEWIDE  
BY TOTAL HUNTERS  
2007**

|             | LICENSES<br>SOLD | NUMBER<br>ACTIVE<br>HUNTERS | HARVEST |     |      |       | TOTAL<br>RECREATION<br>DAYS | HUNTER<br>SUCCESS | DAYS/<br>HARVEST |
|-------------|------------------|-----------------------------|---------|-----|------|-------|-----------------------------|-------------------|------------------|
|             |                  |                             | RAM     | EWE | LAMB | TOTAL |                             |                   |                  |
| STATE TOTAL | 238              | 237                         | 200     | 1   | 0    | 201   | 2225                        | 84.81             | 11.07            |
| RESIDENT    | 177              | 176                         | 150     | 1   | 0    | 151   | 1739                        | 85.80             | 11.52            |
| NONRESIDENT | 61               | 61                          | 50      | 0   | 0    | 50    | 486                         | 81.97             | 9.72             |

**TEN-YEAR COMPARISON OF HARVEST TABLE**

|         |      |      |      |      |      |      |      |      |      |      |
|---------|------|------|------|------|------|------|------|------|------|------|
| YEAR    | 1998 | 1999 | 2000 | 2001 | 2002 | 2003 | 2004 | 2005 | 2006 | 2007 |
| HARVEST | 183  | 173  | 185  | 206  | 183  | 183  | 205  | 172  | 186  | 201  |

**HARVEST BY HARVEST TOOL**

|  |               |                |               |
|--|---------------|----------------|---------------|
|  | ARCHERY<br>1% | FIREARM<br>99% | TOTAL<br>100% |
|--|---------------|----------------|---------------|

**BIGHORN SHEEP**  
HARVEST BY HUNT AREA  
**2007**

| AREA<br>(cross hunt areas) | TYPE        | ACTIVE<br>LICS/HTRS | HARVEST |     |      |       | HUNTER<br>SUCCESS | DAYS/<br>HARVEST | HUNTER<br>DAYS | (cross hunt incl)<br>LICENSES<br>SOLD |
|----------------------------|-------------|---------------------|---------|-----|------|-------|-------------------|------------------|----------------|---------------------------------------|
|                            |             |                     | RAM     | EWE | LAMB | TOTAL |                   |                  |                |                                       |
| 1 Clark's Fork             | Limited 1   |                     |         |     |      |       |                   |                  |                |                                       |
|                            | Resident    | 15                  | 12      | 0   | 0    | 12    | 80.00%            | 26.25            | 315            | 15                                    |
|                            | Nonresident | 5                   | 4       | 0   | 0    | 4     | 80.00%            | 17.25            | 69             | 5                                     |
|                            | Area Total  | 20                  | 16      | 0   | 0    | 16    | 80.00%            | 24.00            | 384            | 20                                    |
| 2 Trout Peak               | Limited 1   |                     |         |     |      |       |                   |                  |                |                                       |
|                            | Resident    | 19                  | 14      | 0   | 0    | 14    | 73.68%            | 12.57            | 176            | 19                                    |
|                            | Nonresident | 6                   | 3       | 0   | 0    | 3     | 50.00%            | 12.67            | 38             | 6                                     |
|                            | Area Total  | 25                  | 17      | 0   | 0    | 17    | 68.00%            | 12.59            | 214            | 25                                    |
| 3 Wapiti Ridge             | Limited 1   |                     |         |     |      |       |                   |                  |                |                                       |
|                            | Resident    | 31                  | 29      | 0   | 0    | 29    | 93.55%            | 8.76             | 254            | 31                                    |
|                            | Nonresident | 11                  | 8       | 0   | 0    | 8     | 72.73%            | 15.13            | 121            | 11                                    |
|                            | Area Total  | 42                  | 37      | 0   | 0    | 37    | 88.10%            | 10.14            | 375            | 42                                    |
| 4 Yount's Peak             | Limited 1   |                     |         |     |      |       |                   |                  |                |                                       |
|                            | Resident    | 28                  | 24      | 0   | 0    | 24    | 85.71%            | 9.04             | 217            | 28                                    |
|                            | Nonresident | 10                  | 7       | 0   | 0    | 7     | 70.00%            | 13.57            | 95             | 10                                    |
|                            | Area Total  | 38                  | 31      | 0   | 0    | 31    | 81.58%            | 10.06            | 312            | 38                                    |
| 5 Franc's Peak<br>(22)     | Limited 1   |                     |         |     |      |       |                   |                  |                |                                       |
|                            | Resident    | 52                  | 46      | 0   | 0    | 46    | 88.46%            | 7.67             | 353            | 52                                    |
|                            | Nonresident | 18                  | 18      | 0   | 0    | 18    | 100.00%           | 3.06             | 55             | 18                                    |
|                            | Area Total  | 70                  | 64      | 0   | 0    | 64    | 91.43%            | 6.38             | 408            | 70                                    |
| 6 Targhee                  | Limited 1   |                     |         |     |      |       |                   |                  |                |                                       |
|                            | Resident*   | 2                   | 1       | 0   | 0    | 1     | 50.00%            | 25.00            | 25             | 3                                     |
|                            | Nonresident | 1                   | 0       | 0   | 0    | 0     | 0.00%             | 0.00             | 9              | 1                                     |
|                            | Area Total  | 3                   | 1       | 0   | 0    | 1     | 33.33%            | 34.00            | 34             | 4                                     |
| *1 resident did not hunt   |             |                     |         |     |      |       |                   |                  |                |                                       |
| 7 Jackson                  | Limited 1   |                     |         |     |      |       |                   |                  |                |                                       |
|                            | Resident    | 7                   | 4       | 1   | 0    | 5     | 71.43%            | 41.20            | 206            | 7                                     |
|                            | Nonresident | 2                   | 2       | 0   | 0    | 2     | 100.00%           | 12.50            | 25             | 2                                     |
|                            | Area Total  | 9                   | 6       | 1   | 0    | 7     | 77.78%            | 33.00            | 231            | 9                                     |
| 8 Sheep Mountain<br>(23)   | Limited 1   |                     |         |     |      |       |                   |                  |                |                                       |
|                            | Nonresident | 1                   | 1       | 0   | 0    | 1     | 100.00%           | 9.00             | 9              | 1                                     |
|                            | Area Total  | 1                   | 1       | 0   | 0    | 1     | 100.00%           | 9.00             | 9              | 1                                     |
| 9 Dinwoody                 | Limited 1   |                     |         |     |      |       |                   |                  |                |                                       |
|                            | Resident    | 3                   | 2       | 0   | 0    | 2     | 66.67%            | 10.00            | 20             | 3                                     |
|                            | Nonresident | 1                   | 1       | 0   | 0    | 1     | 100.00%           | 11.00            | 11             | 1                                     |
|                            | Area Total  | 4                   | 3       | 0   | 0    | 3     | 75.00%            | 10.33            | 31             | 4                                     |
| 10 Jakey's Fork            | Limited 1   |                     |         |     |      |       |                   |                  |                |                                       |
|                            | Resident    | 6                   | 6       | 0   | 0    | 6     | 100.00%           | 11.00            | 66             | 6                                     |
|                            | Nonresident | 2                   | 2       | 0   | 0    | 2     | 100.00%           | 8.00             | 16             | 2                                     |
|                            | Area Total  | 8                   | 8       | 0   | 0    | 8     | 100.00%           | 10.25            | 82             | 8                                     |
| 18 Douglas Creek           | CLOSED      |                     |         |     |      |       |                   |                  |                |                                       |
| 19 Laramie Peak            | Limited 1   |                     |         |     |      |       |                   |                  |                |                                       |
|                            | Resident    | 3                   | 3       | 0   | 0    | 3     | 100.00%           | 6.67             | 20             | 3                                     |
|                            | Nonresident | 1                   | 1       | 0   | 0    | 1     | 100.00%           | 24.00            | 24             | 1                                     |
|                            | Area Total  | 4                   | 4       | 0   | 0    | 4     | 100.00%           | 11.00            | 44             | 4                                     |
| 21 Encampment River        | CLOSED      |                     |         |     |      |       |                   |                  |                |                                       |
| 22 Dubois Badlands<br>(5)  | Limited 1   |                     |         |     |      |       |                   |                  |                |                                       |
|                            | Resident    | 3                   | 3       | 0   | 0    | 3     | 100.00%           | 6.33             | 19             | 3                                     |
|                            | Nonresident | 1                   | 1       | 0   | 0    | 1     | 100.00%           | 4.00             | 4              | 1                                     |

**BIGHORN SHEEP**  
**HARVEST BY HUNT AREA**  
**2007**

| AREA<br><br>(cross hunt areas) | TYPE        | ACTIVE<br>LICS/HTRS | HARVEST |     |      |       | HUNTER<br>SUCCESS | DAYS/<br>HARVEST | HUNTER<br>DAYS | (cross hunt incl)<br>LICENSES<br>SOLD |
|--------------------------------|-------------|---------------------|---------|-----|------|-------|-------------------|------------------|----------------|---------------------------------------|
|                                |             |                     | RAM     | EWE | LAMB | TOTAL |                   |                  |                |                                       |
|                                | Area Total  | 4                   | 4       | 0   | 0    | 4     | 100.00%           | 5.75             | 23             | 4                                     |
| 23 Desolation Peak<br>(8)      | Limited 1   |                     |         |     |      |       |                   |                  |                |                                       |
|                                | Resident    | 7                   | 6       | 0   | 0    | 6     | 85.71%            | 11.33            | 68             | 7                                     |
|                                | Nonresident | 2                   | 2       | 0   | 0    | 2     | 100.00%           | 5.00             | 10             | 2                                     |
|                                | Area Total  | 9                   | 8       | 0   | 0    | 8     | 88.89%            | 9.75             | 78             | 9                                     |

## WYOMING GAME AND FISH COMMISSION

### CHAPTER 9

#### BIGHORN SHEEP HUNTING SEASONS

Section 1. Authority. This regulation is promulgated by authority of W.S. §23-1-302, §23-1-703, §23-2-104 and §23-3-117.

Section 2. Hunting Seasons Established. There shall be open seasons during 2007 for the hunting of bighorn sheep as set forth in this Chapter and in accordance with Chapter 2, General Hunting Regulation.

Section 3. Regular Hunting Seasons.

(a) Hunt areas, season dates and limitations.

| Hunt Area | Type | Date of Seasons |         | Limitations                                                                                                                                                                                       |
|-----------|------|-----------------|---------|---------------------------------------------------------------------------------------------------------------------------------------------------------------------------------------------------|
|           |      | Opens           | Closes  |                                                                                                                                                                                                   |
| 1         | 1    | Sept. 1         | Oct. 31 | Limited quota; 20 licenses any ram                                                                                                                                                                |
| 2         | 1    | Sept. 1         | Oct. 31 | Limited quota; 24 licenses any ram                                                                                                                                                                |
| 3         | 1    | Sept. 1         | Oct. 20 | Limited quota; 44 licenses any ram                                                                                                                                                                |
|           |      | Oct. 21         | Oct. 31 | Unused Area 3 Type 1 licenses valid only in that portion of Area 3 in the North Fork of the Shoshone River drainage and the South Fork of the Shoshone River drainage northeast of Ishawooa Creek |
| 4         | 1    | Sept. 1         | Oct. 20 | Limited quota; 40 licenses any ram                                                                                                                                                                |
| 5         | 1    | Sept. 1         | Oct. 20 | Limited quota; 48 licenses any ram                                                                                                                                                                |
| 6         | 1    | Aug. 15         | Oct. 31 | Limited quota; 4 licenses any ram                                                                                                                                                                 |
| 7         | 1    | Sept. 1         | Oct. 31 | Limited quota; 8 licenses any bighorn sheep                                                                                                                                                       |
| 8, 23     | 1    | Sept. 1         | Oct. 15 | Limited quota; 12 licenses any ram                                                                                                                                                                |
| 9         | 1    | Aug. 15         | Oct. 15 | Limited quota; 4 licenses any ram                                                                                                                                                                 |
| 10        | 1    | Aug. 15         | Oct. 15 | Limited quota; 8 licenses any ram                                                                                                                                                                 |
| 18, 21    |      |                 |         | CLOSED                                                                                                                                                                                            |
| 19        | 1    | Sept. 1         | Oct. 31 | Limited quota; 4 licenses any ram                                                                                                                                                                 |
| 22        | 1    | Sept. 1         | Oct. 20 | Limited quota; 4 licenses any ram; also valid in Area 5 after September 30 for any ram                                                                                                            |
| 24        |      |                 |         | CLOSED                                                                                                                                                                                            |

Section 4. Special Archery Seasons.

(a) Hunt areas listed in this section shall have special archery hunting seasons during the dates and with limitations specified in this section. Archers shall possess a limited quota bighorn sheep license in addition to an archery license in order to hunt bighorn sheep during any special archery season. Archers shall hunt only in the hunt area(s) and for the type of bighorn sheep set forth by the limitations of their license as specified in Section 3 of this Chapter.

| Hunt Area             | Dates of Seasons |         | Limitations                        |
|-----------------------|------------------|---------|------------------------------------|
|                       | Opens            | Closes  |                                    |
| 1-5, 7, 8, 19, 22, 23 | Aug. 15          | Aug. 31 | Refer to Section 3 of this Chapter |
| 9, 10                 | Aug. 1           | Aug. 14 | Refer to Section 3 of this Chapter |



Section 5. Definitions.

(a) “Bighorn sheep horns” mean the hollow horn sheaths of male bighorn sheep, either attached to the skull or separated.

(b) “Plugging” means placement of a permanent metal plug provided and attached by the Wyoming Game and Fish Department.

(c) “Ram” means a male bighorn sheep.

Section 6. Registration and Plugging of Bighorn Sheep Horns. Any person harvesting a bighorn sheep in Wyoming shall within fifteen (15) consecutive days following the harvest present the horns attached to the skull plate for registration and plugging. Any person picking up any bighorn sheep horns in Wyoming shall within fifteen (15) consecutive days following the pickup of the horns present the horn or horns for registration, plugging and interstate game tagging. Plugging may be omitted if the Game and Fish Department determines that the size or condition of the horn prevents proper plugging. Any person taking bighorn sheep horns shall present them in person at one of the following Game and Fish Department offices, Monday through Friday, excluding legal holidays, 8:00 a.m. - 12:00 p.m. and 1:00 p.m. - 5:00 p.m. Bighorn sheep horns not originating in Wyoming shall not be plugged.

|                                       |             |                 |
|---------------------------------------|-------------|-----------------|
| Game and Fish Department Headquarters | Cheyenne    | 1(800) 842-1934 |
| Casper Region                         | Casper      | 1(800) 233-8544 |
| Cody Region                           | Cody        | 1(800) 654-1178 |
| Green River Region                    | Green River | 1(800) 843-8096 |
| Lander Region                         | Lander      | 1(800) 654-7862 |
| Laramie Region                        | Laramie     | 1(800) 843-2352 |
| Pinedale/Jackson Region               | Jackson     | 1(800) 423-4113 |
|                                       | Pinedale    | 1(800) 452-9107 |
| Sheridan Region                       | Sheridan    | 1(800) 331-9834 |

(a) The Wyoming Game and Fish Department may require substantive proof from individuals that do not possess a valid bighorn sheep license and take bighorn sheep horns that the horns were legally acquired. Failure to provide such proof may result in seizure of the horns. Before plugging any bighorn sheep horns, the person may be required to take a Wyoming Game and Fish Department enforcement officer to the location where the bighorn sheep horns were acquired. Failure to comply with this request shall be a violation of this regulation and the bighorn sheep horns may be seized.

(b) No person shall alter, deface or remove a plug placed in a bighorn sheep horn by the Wyoming Game and Fish Department.

(c) No person shall possess the horn(s) of a bighorn sheep that bears an altered, defaced or counterfeit Wyoming plug or from which the plug has been removed.

(d) The insertion of a Wyoming plug does not in itself certify that the animal was legally taken or possessed.

(e) Any person who makes a false statement on the registration form regarding the date the bighorn sheep was taken or the hunt area in which it was taken shall be in violation of this regulation. Such violation shall be punishable as provided by Title 23, Wyoming Statutes for violation of Commission regulations.

Section 7. Hunt Area Descriptions.

(a) Area and Number

Area 1. Clark's Fork. All of the drainage of the Clark's Fork River north of Sunlight Creek and north of the Clark's Fork River below its confluence with Sunlight Creek; and the drainage of Soda Butte Creek outside of Yellowstone National Park.

Area 2. Trout Peak. All of the north drainage of the North Fork of the Shoshone River and north of U.S. Highway 14-16-20 between Pahaska Teepee and the east boundary of Yellowstone National Park; all of the south drainage of the Clark's Fork River south and east of Sunlight Creek and west of Wyoming Highway 120; all of the north drainage of the Shoshone River west of Wyoming Highway 120.

Area 3. Wapiti Ridge. Beginning where U.S. Highway 14-16-20 intersects the east boundary of Yellowstone National Park; easterly down said highway to the North Fork of the Shoshone River; easterly down said river to the South Fork of the Shoshone River at the Buffalo Bill Reservoir; southwesterly up said river to Deer Creek; westerly up said creek to the head of Butte Creek; westerly down said creek to the Thorofare River; westerly down said river to the Yellowstone National Park boundary; easterly then northerly along said boundary to U.S. Highway 14-16-20.

Area 4. Yount's Peak. Beginning where Deer Creek enters the South Fork of the Shoshone River; southerly up said river to Needle Creek; southerly up said creek to the head of Emerald Creek; southerly down said creek to Wiggins Fork Creek; southerly down said creek to the Wiggins Fork Road (Shoshone National Forest Road 285); southerly down said road to the Shoshone National Forest boundary; westerly then southerly along said boundary to U.S. Highway 287; northwesterly along said highway to the east boundary of Grand Teton National Park; northerly and westerly along said boundary to U.S. Highway 287; northerly along said highway to the south boundary of Yellowstone National Park; easterly along said boundary to the Thorofare River; easterly up said river to Butte Creek; northeasterly up said creek to the head of Deer Creek; easterly down said creek to the South Fork of the Shoshone River.

Area 5. Franc's Peak. Beginning where Needle Creek enters the South Fork of the Shoshone River; northeasterly down said river to the Shoshone River; easterly down said river to Wyoming Highway 120; southeasterly along said highway to the Bighorn River; southerly up said river to the Wind River Indian Reservation boundary; westerly along said boundary to the Shoshone National Forest boundary; northwesterly, southwesterly, then westerly along said boundary to the Wiggins Fork Road (Shoshone National Forest Road 285); northerly along said road to Wiggins Fork Creek; northerly up said creek to Emerald Creek; northerly up said creek to Needle Creek; northerly down said creek to the South Fork of the Shoshone River; in addition, all non-Indian fee title lands in that portion of Hot Springs County within the exterior boundaries of the Wind River Indian Reservation.

Area 6. Targhee. Beginning where the Snake River crosses the Wyoming-Idaho state line; northerly along said line to the Yellowstone National Park boundary; easterly along said boundary to the Targhee-John D. Rockefeller Jr. Memorial Parkway boundary; southerly along said boundary to the Targhee Forest-Grand Teton National Park boundary; southerly along said boundary to the Bridger-Teton National Forest-Grand Teton National Park boundary; northerly, easterly and southerly along said boundary to Wyoming Highway 390 west of the Snake River; southerly along said highway to Wyoming Highway 22; easterly along said highway to the Snake River; southerly along said river to the Wyoming-Idaho state line.

Area 7. Jackson. Beginning at Togwotee Pass on the Continental Divide; southerly along said divide to the Union Pass Road (USFS Road 600); westerly along said road to Wagon Creek; southerly down said creek to the Green River; southerly down said river to the Bridger-Teton National Forest boundary; westerly along said boundary to the divide between the Green River and the Hoback River at the Hoback Rim where U.S. Highway 191 crosses the Rim; westerly along said divide to the divide between the Greys River and the Hoback River; northerly along said divide to the divide between the Greys River

and Willow Creek; northerly along said divide to the divide between Bailey Creek and Willow Creek (Greyback Ridge); northerly along said divide to the Dry Wash Draw; westerly down said draw to Bailey Creek; northwesterly down said creek to the Snake River; northerly along said river to Wyoming Highway 22; easterly along said highway to U.S. Highway 191; easterly along said highway to the National Elk Refuge boundary at the north end of the town of Jackson; southerly, easterly and northerly along said boundary to the Grand Teton National Park boundary; northerly along said boundary to U.S. Highway 26-287; easterly along said highway to Togwotee Pass.

Area 8. Sheep Mountain. Beginning where Pine Creek crosses U.S. Highway 191 in the town of Pinedale; northwesterly along said highway to the Green River at Warren Bridge; northerly, easterly and southerly up said river to Trail Creek; southerly up said creek to Summit Lake and the head of Pine Creek; southerly down said creek to U.S. Highway 191.

Area 9. Dinwoody. Beginning where U.S. Highway 287 crosses Torrey Creek; southerly along said highway to the Wind River Indian Reservation boundary; southerly along said boundary to the Continental Divide; northwesterly along said divide to the head of Bomber Creek (East Fork of Torrey Creek); northeasterly down said creek to Torrey Creek; northerly down said creek to U.S. Highway 287.

Area 10. Jakey's Fork. Beginning where Torrey Creek crosses U.S. Highway 287; southwestly up said creek to Bomber Creek (East Fork of Torrey Creek); southwestly up said creek to the Continental Divide; northerly along said divide to the head of Roaring Fork Creek; southerly down said creek to the Green River; westerly and southerly down said river to Wagon Creek; northwesterly up said creek to the Union Pass Road (USFS Road 600); northerly along said road to the Continental Divide; northwesterly along said divide to U.S. Highway 287; southeasterly along said highway to Torrey Creek.

Area 18. Douglas Creek. Beginning where Wyoming Highway 230 crosses the Wyoming-Colorado state line near Mountain Home; westerly along said line to Wyoming Highway 230; northwesterly along said highway to Wyoming Highway 130; easterly along said highway to Wyoming Highway 230; southwestly along said highway to the Wyoming-Colorado state line.

Area 19. Laramie Peak. Beginning at the junction of Interstate Highway 25 and Wyoming Highway 211 at the town of Chugwater; southwestly along Wyoming Highway 211 to the Iron Mountain-Jordan Road (Platte County Road 10-Laramie County Road 106-2), southwestly along said road to Wyoming Highway 211; southerly along said road to the Fisher Canyon-Rogers Canyon Road (Laramie County Road 228-1 - Albany County Road 17) at Horse Creek Station; southwestly along said road to U.S. Highway 30 at the town of Laramie; northwesterly along said highway to Wyoming Highway 487; northerly along said highway to Wyoming Highway 220; northeasterly along said highway to Interstate Highway 25; southeasterly along said interstate to Wyoming Highway 211.

Area 21. Encampment River. Beginning where Wyoming Highway 130 crosses the North Platte River in the town of Saratoga; southerly along said highway to Wyoming Highway 230; southeasterly along said highway to the Wyoming-Colorado state line; westerly along said line to the Medicine Bow National Forest boundary near the confluence of Spring Creek and the Little Snake River; westerly and northerly along said boundary to Wyoming Highway 70; northeasterly along said highway to the Sage Creek Road (U.S.F.S. Road 801-Carbon County Road 401); northerly along said road to Sage Creek; easterly down said creek to the North Platte River; southerly up said river to Wyoming Highway 130 in the town of Saratoga.

Area 22. Dubois Badlands. Beginning where U.S. Highway 287 crosses the Wind River Indian Reservation boundary; westerly along said highway to the Wiggins Fork Road (Fremont County Road 285); northerly along said road to the Shoshone National Forest boundary; easterly along said boundary to the Wind River Indian Reservation boundary; southerly along said boundary to U.S. Highway 287. This includes those areas of the Spence-Moriarity Wildlife Habitat Area east of the East Fork of the Wind River.

Area 23. Desolation Peak. Beginning where Roaring Fork Creek enters the Green River; easterly up said creek to the Continental Divide; southwestly along said divide to Hay Pass and the head of the

North Fork of Boulder Creek; southwesterly down said creek to the Bridger-Teton National Forest boundary; northwesterly along said boundary to Pine Creek; northerly up said creek to Summit Lake and the head of Trail Creek; northerly down said creek to the Green River; northerly down said river to Roaring Fork Creek.

Area 24. Big Piney. Beginning at a point where the Bridger-Teton National Forest boundary crosses LaBarge Creek; westerly up said creek to the head of the Greys River; northerly down said river to Deadman Creek; easterly up said creek to the divide between the Greys River and the Hoback River, southerly along said divide to the divide between the Hoback River and the Green River; easterly along said divide to the Bridger-Teton National Forest boundary on Hoback Rim; southerly along said boundary to LaBarge Creek.

#### WYOMING GAME AND FISH COMMISSION

By:

Bill Williams, DVM, President

Dated: April 24, 2007

## A detailed topographic map of the Appalachian region, showing counties, towns, and geographical features. The map is overlaid with a red boundary and numbered regions (1-24). The regions are numbered as follows: 1 (top left), 2 (top center), 3 (top right), 4 (middle left), 5 (middle center), 6 (bottom left), 7 (bottom center), 8 (bottom right), 9 (top right), 10 (middle right), 11 (bottom right), 12 (top right), 13 (middle right), 14 (bottom right), 15 (top right), 16 (middle right), 17 (bottom right), 18 (top right), 19 (middle right), 20 (bottom right), 21 (top right), 22 (middle right), 23 (bottom right), and 24 (bottom right). The map includes labels for various counties such as Campbell, Davidson, Henderson, and Wayne. It also shows major roads, rivers, and towns like Knoxville, Chattanooga, and Dalton. The red boundary follows a specific path through the region, likely indicating a study area or a specific administrative boundary. The numbered regions are distributed across the map, with some regions being larger than others. The map is a detailed topographic map, showing elevation, terrain, and other geographical features. The red boundary is a prominent feature, and the numbered regions are clearly marked. The map is a valuable resource for understanding the geography of the Appalachian region.

Note:  Wilderness area, nonresidents must have guides.



**MOUNTAIN GOAT  
HARVEST STATEWIDE  
BY TOTAL HUNTERS  
2007**

|             | LICENSES<br>SOLD | NUMBER<br>ACTIVE<br>HUNTERS | HARVEST<br>TOTAL | TOTAL<br>RECREATION<br>DAYS | HUNTER<br>SUCCESS | DAYS/<br>HARVEST |
|-------------|------------------|-----------------------------|------------------|-----------------------------|-------------------|------------------|
| STATE TOTAL | 20               | 20                          | 19               | 113                         | 95%               | 5.947            |
| RESIDENT    | 15               | 15                          | 14               | 94                          | 100%              | 6.714            |
| NONRESIDENT | 5                | 5                           | 5                | 19                          | 100%              | 3.80             |

**TEN YEAR COMPARISON OF HARVEST**

| YEAR    | 1998 | 1999 | 2000 | 2001 | 2002 | 2003 | 2004 | 2005 | 2006 | 2007 |
|---------|------|------|------|------|------|------|------|------|------|------|
| HARVEST | 12   | 16   | 13   | 17   | 15   | 15   | 15   | 19   | 20   | 19   |

**MOUNTAIN GOAT  
HARVEST STATEWIDE  
BY HUNT AREA  
2007**

| HUNT AREA<br>#1 | LICENSES<br>SOLD | NUMBER<br>ACTIVE<br>HUNTERS | HARVEST |       |       | TOTAL<br>RECREATION<br>DAYS | HUNTER<br>SUCCESS | DAYS/<br>HARVEST |
|-----------------|------------------|-----------------------------|---------|-------|-------|-----------------------------|-------------------|------------------|
|                 |                  |                             | BILLY   | NANNY | TOTAL |                             |                   |                  |
| RESIDENT        | 9                | 9                           | 5       | 3     | 8     | 72                          | 88.89%            | 9.00             |
| NONRESIDENT     | 3                | 3                           | 3       | 0     | 3     | 13                          | 100%              | 4.33             |
| AREA TOTAL      | 12               | 12                          | 8       | 3     | 11    | 85                          | 91.67%            | 7.73             |

  

| HUNT AREA<br>#2 | LICENSES<br>SOLD | NUMBER<br>ACTIVE<br>HUNTERS | HARVEST |       |       | TOTAL<br>RECREATION<br>DAYS | HUNTER<br>SUCCESS | DAYS/<br>HARVEST |
|-----------------|------------------|-----------------------------|---------|-------|-------|-----------------------------|-------------------|------------------|
|                 |                  |                             | BILLY   | NANNY | TOTAL |                             |                   |                  |
| RESIDENT        | 6                | 6                           | 4       | 2     | 6     | 22                          | 100%              | 3.67             |
| NONRESIDENT     | 2                | 2                           | 2       | 0     | 2     | 6                           | 100%              | 3.00             |
| AREA TOTAL      | 8                | 8                           | 6       | 2     | 8     | 28                          | 100%              | 3.50             |



## WYOMING GAME AND FISH COMMISSION

### CHAPTER 24

#### MOUNTAIN GOAT HUNTING SEASONS

Section 1. Authority. This regulation is promulgated by authority of W.S. §23-1-302, §23-1-703 and §23-2-104.

Section 2. Hunting Seasons Established. There shall be open seasons during 2007 for the hunting of mountain goat as set forth in this Chapter and in accordance with Chapter 2, General Hunting Regulation.

Section 3. Regular Hunting Seasons.

(a) Hunt areas, season dates and limitations.

| Hunt Area | Type | Date of Seasons |         | Limitations                                  |
|-----------|------|-----------------|---------|----------------------------------------------|
|           |      | Opens           | Closes  |                                              |
| 1         | 1    | Sept. 1         | Oct. 31 | Limited quota; 12 licenses any mountain goat |
| 2         | 1    | Sept. 1         | Oct. 31 | Limited quota; 8 licenses any mountain goat  |

Section 4. Special Archery Seasons. Hunt areas listed in this section shall have special archery hunting seasons during the dates and with limitations as specified in this section. Archers shall possess a limited quota mountain goat license in addition to an archery license in order to hunt mountain goat during any special archery season. Archers shall hunt only in the hunt area(s) and for the type of mountain goat as set forth by the limitations for their license as specified in Section 3 of this Chapter.

| Hunt Area | Date of Seasons |         | Limitations                        |
|-----------|-----------------|---------|------------------------------------|
|           | Opens           | Closes  |                                    |
| 1, 2      | Aug. 15         | Aug. 31 | Refer to Section 3 of this Chapter |

Section 5. Registration of Mountain Goat.

(a) Any person harvesting a mountain goat in Wyoming shall within fifteen (15) consecutive days following the harvest present the skull plate and horns for registration. Any person harvesting a mountain goat shall register the harvested mountain goat in person at one of the following Game and Fish Department Offices Monday through Friday, excluding legal holidays, 8:00 a.m. - 12:00 p.m. and 1:00 p.m. - 5:00 p.m.

|                                          |                           |                 |
|------------------------------------------|---------------------------|-----------------|
| Game and Fish Department<br>Headquarters | Cheyenne<br>(307)777-4583 | 1(800) 842-1934 |
| Casper Region                            | Casper                    | 1(800) 233-8544 |
| Cody Region                              | Cody                      | 1(800) 654-1178 |
| Green River Region                       | Green River               | 1(800) 843-8096 |
| Lander Region                            | Lander                    | 1(800) 654-7862 |
| Laramie Region                           | Laramie                   | 1(800) 843-2352 |
| Pinedale/Jackson Region                  | Jackson                   | 1(800) 423-4113 |
|                                          | Pinedale                  | 1(800) 452-9107 |
| Sheridan Region                          | Sheridan                  | 1(800) 331-9834 |

(b) Any person who makes a false statement on the registration form regarding the date the mountain goat was taken or the hunt area in which it was taken shall be in violation of this regulation. Such violation shall be punishable as provided by Title 23, Wyoming Statutes, for violation of Commission regulations.

Section 6. Hunt Area Descriptions.

(a) Area and Number.

Area 1. Beartooth. All of the drainage of the Clark's Fork River west of Wyoming Highway 120; all of the drainage of Soda Butte Creek outside of Yellowstone National Park.

Area 2. Palisades. Beginning where Wyoming Highway 22 crosses the Snake River; southerly and westerly down said river to the Wyoming-Idaho state line; northerly along said line to Wyoming Highway 22; easterly along said highway to the Snake River.

WYOMING GAME AND FISH COMMISSION

By:

Bill Williams, DVM, President

Dated: April 24, 2007

# MOUNTAIN GOAT HUNT AREAS

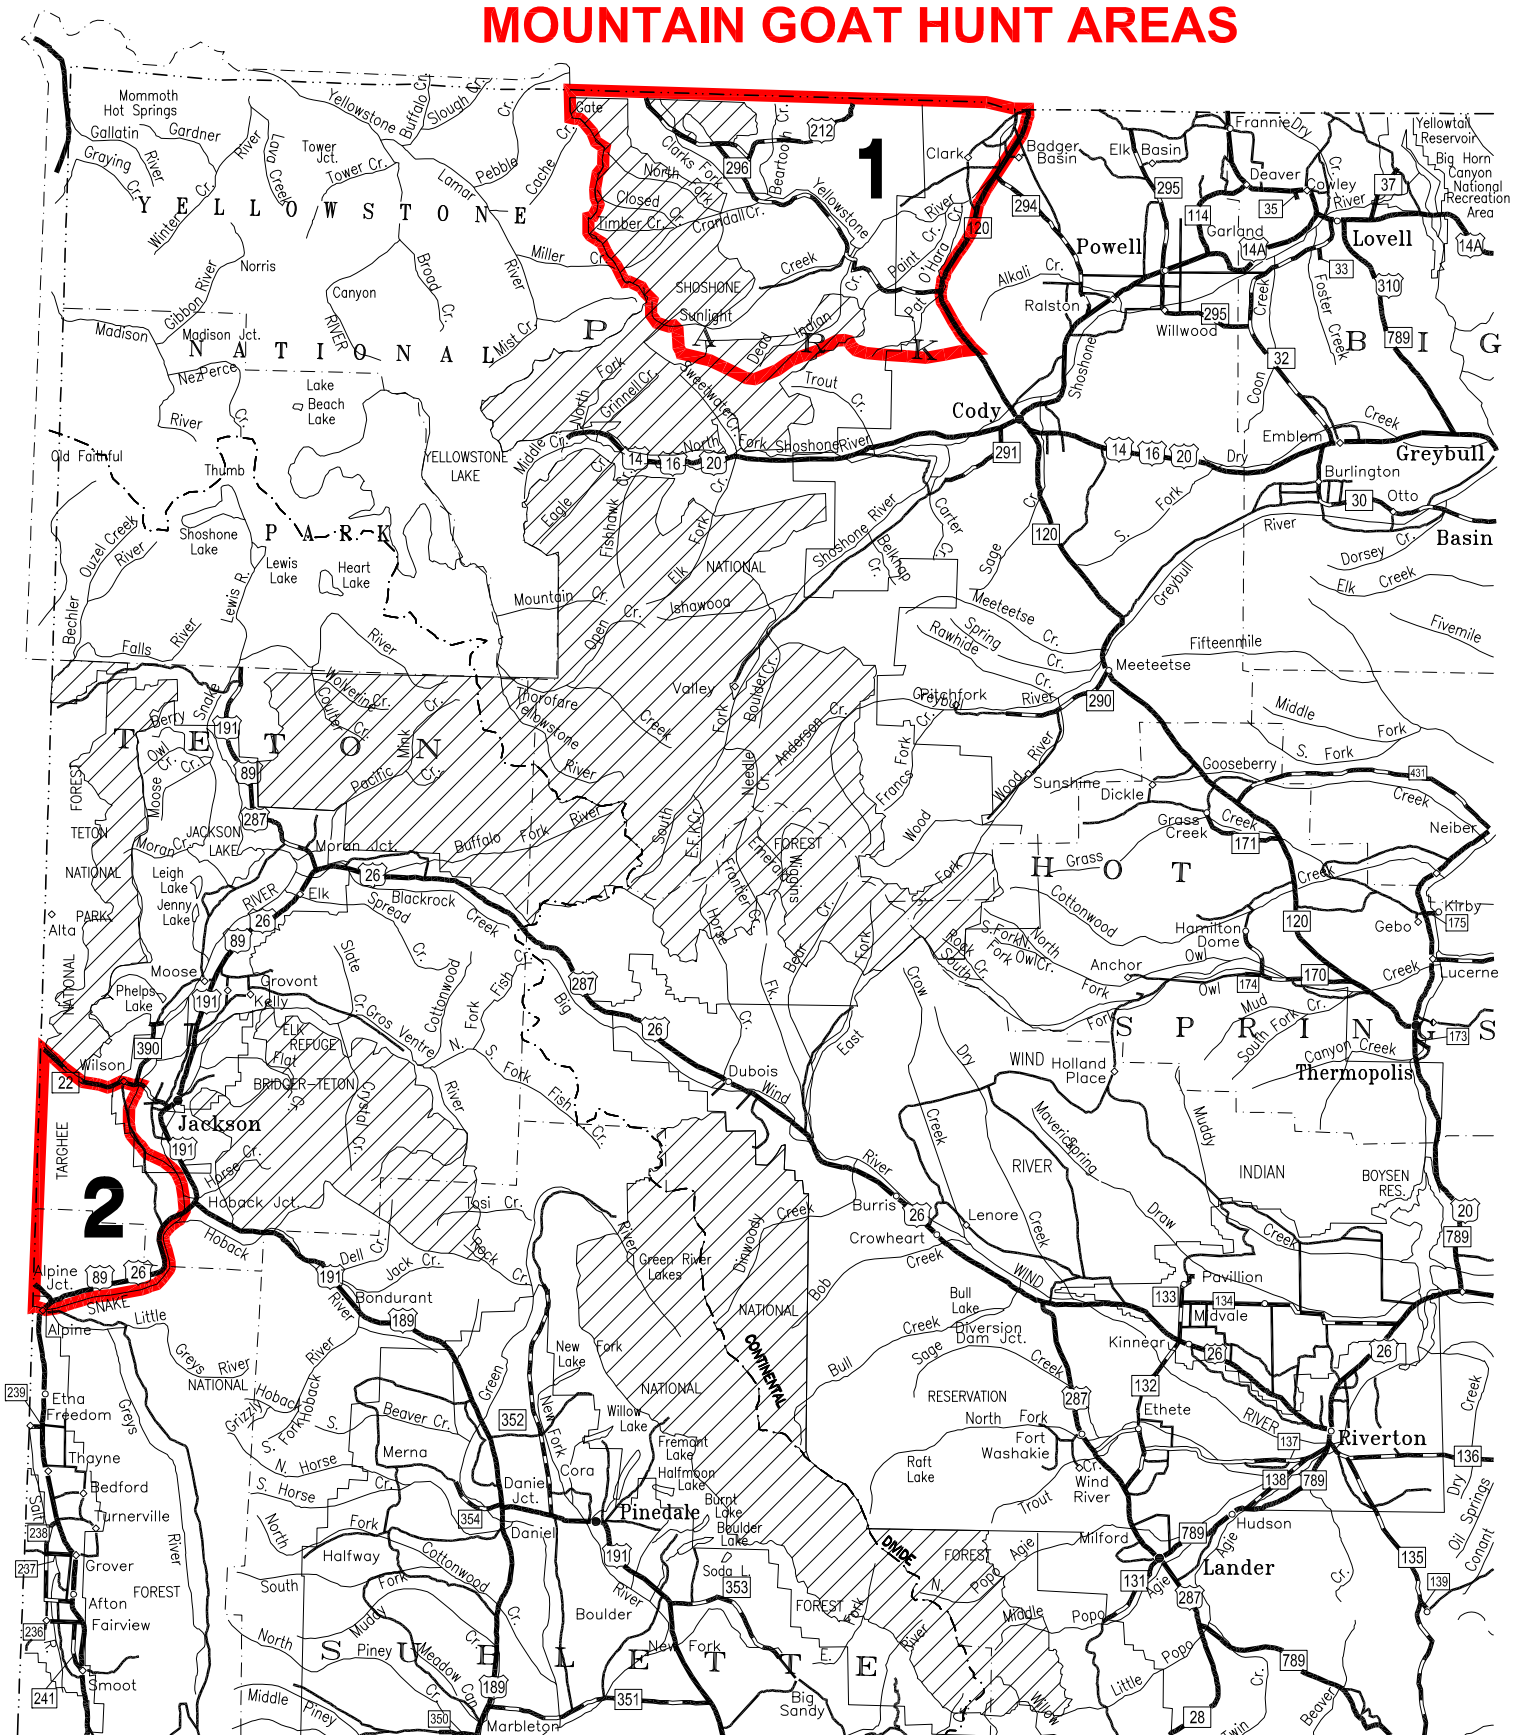

THIS MAP IS FOR GENERAL REFERENCE ONLY. Please use the written boundary descriptions in this regulation for detailed boundary information.

Note:  Wilderness area, nonresidents must have guides.



**BULL BISON**  
**HARVEST STATEWIDE**  
**BY TOTAL HUNTERS**  
**2007**

|             | LICENSES<br>SOLD | NUMBER<br>ACTIVE<br>HUNTERS | HARVEST<br>TOTAL | TOTAL<br>RECREATION<br>DAYS | HUNTER<br>SUCCESS | DAYS/<br>HARVEST |
|-------------|------------------|-----------------------------|------------------|-----------------------------|-------------------|------------------|
| STATE TOTAL | 113              | 113                         | 113              | 185                         | 100%              | 1.637            |
| RESIDENT    | 96               | 96                          | 96               | 159                         | 100%              | 1.656            |
| NONRESIDENT | 17               | 17                          | 17               | 26                          | 100%              | 1.529            |

**NINE-YEAR COMPARISON OF HARVEST**

| YEAR    | 1999 | 2000 | 2001 | 2002 | 2003 | 2004 | 2005 | 2006 | 2007 |
|---------|------|------|------|------|------|------|------|------|------|
| HARVEST | 4    | 13   | 19   | 25   | 27   | 21   | 23   | 23   | *113 |

\*The area available for bison hunting expanded in 2007, resulting in an increase in licenses available for sale.

**COW BISON**  
**HARVEST STATEWIDE**  
**BY TOTAL HUNTERS**  
**2007**

|             | LICENSES<br>SOLD | NUMBER<br>ACTIVE<br>HUNTERS | HARVEST<br>TOTAL | TOTAL<br>RECREATION<br>DAYS | HUNTER<br>SUCCESS | DAYS/<br>HARVEST |
|-------------|------------------|-----------------------------|------------------|-----------------------------|-------------------|------------------|
| STATE TOTAL | 164              | 164                         | 154              | 639                         | 93.90%            | 4.149            |
| RESIDENT    | 161              | 161                         | 151              | 629                         | 93.79%            | 4.166            |
| NONRESIDENT | 3                | 3                           | 3                | 10                          | 100.00%           | 3.333            |

**NINE YEAR COMPARISON OF HARVEST**

| YEAR    | 1999 | 2000 | 2001 | 2002 | 2003 | 2004 | 2005 | 2006 | 2007 |
|---------|------|------|------|------|------|------|------|------|------|
| HARVEST | 5    | 6    | 22   | 22   | 13   | 10   | 13   | 25   | *154 |

\*The area available for bison hunting expanded in 2007, resulting in an increase in licenses available for sale.

# WYOMING GAME AND FISH COMMISSION

## CHAPTER 15

### WILD BISON RECREATIONAL HUNTING SEASON

Section 1. Authority. This regulation is promulgated by authority of W.S. §23-1-101, §23-1-302 and §23-2-107.

Section 2. Regulation. The Wyoming Game and Fish Commission hereby adopts the following regulation governing wild bison recreational hunting seasons. This regulation shall remain in effect until modified or repealed by the Commission.

Section 3. Definitions. For the purpose of this regulation, definitions shall be as set forth in Title 23, Wyoming Statutes, and the Commission also adopts the following definitions:

(a) “Edible portions” means the meat of the front quarters as far down as the knees, the meat of the hindquarters as far down as the hocks, and the meat along the backbone between the neck and hindquarters, excluding meat on the ribs and neck.

(b) “Harvest year” means seven (7) consecutive months beginning July 1 of each year through January 31 of the next succeeding year.

Section 4. Recreational Hunting Season Established And Effective Date. When the Department determines a wild bison recreational hunting opportunity exists, there shall be a wild bison recreational hunting season as established in accordance with Section 5 through Section 18 of this regulation.

Section 5. Supervision Of Licensees. Wild bison recreational hunting may be done under the supervision and/or direction of Department personnel.

Section 6. Notification.

(a) Applicants shall be notified of their placement on the wild bison priority list by the Department. Applicants on the wild bison priority list shall also be notified by mail or by telephone, in order of their priority ranking, when the Department determines a wild bison recreational hunting opportunity may exist. If telephone calls are made, the calls shall be done by the Department during the evening hours between 4:00 p.m. and 10:00 p.m. If telephone calls are made, a minimum of three (3) attempts by telephone shall be made that evening and the subsequent evening to contact and notify any individual applicant. Notification attempts shall be spaced at a minimum of one-half (½) hour intervals. Department personnel must speak directly to the applicant during the notification call. If an individual cannot be contacted, the next individual on the list shall be notified and those who could not be contacted shall retain their positions on the wild bison priority list. An applicant who declines participation shall have his/her name removed from the wild bison priority list.

(b) At the Department’s discretion, notification may be made by mail. The Department shall send notification by first-class mail to the address listed on the

applicant's application for placement on the wild bison priority list. The notification shall be mailed a minimum of ten (10) days immediately prior to the scheduled wild bison hunting season.

(c) Applicants shall be advised during the notification call or by mail of: the date, time, and location of their scheduled wild bison recreational hunt.

#### Section 7. Selection Of Bison To Be Harvested.

(a) Hunters may be directed by Department personnel to take a specific age class of wild bison in a specific geographic portion of a hunt area and during a specific time period in order to meet the Department's management objectives. Numbers and age classes of wild bison available when the applicant arrives may differ from those available at the time of the notification call or letter. Issuance of a wild bison license provides the licensee an opportunity to hunt a wild bison; it does not guarantee that a licensee shall harvest a wild bison.

#### Section 8. Wild Bison Hunting Orientation Information.

(a) After notification, individuals interested in participating in the wild bison recreational hunting season shall be provided wild bison hunting orientation information in a manner determined by the Department.

Section 9. Firearms. Wild bison shall only be taken with a firearm which has a barrel bore diameter of at least twenty-seven hundredths (27/100) of an inch and is chambered to fire a center-fire cartridge not less than two (2) inches in overall length, including a soft or expanding point bullet seated to a normal depth. The cartridge shall have a minimum of a one hundred fifty (150) grain bullet.

Section 10. Licensing. Licenses shall be issued upon payment by the applicant of the proper license fee at the Department Regional Office administering the wild bison recreational hunt. A license must be purchased prior to participating in the wild bison recreational hunt. A conservation stamp shall be in possession of the licensee while exercising the privileges under the wild bison license.

Section 11. Tagging Requirements. When any wild bison is killed under a license, the licensee shall detach, sign and date the carcass coupon and attach the coupon to the carcass before leaving the site of the kill. The coupon shall remain on the wild bison carcass at all times until the meat undergoes processing, except that during transportation of the carcass the coupon may be removed to prevent its loss. If the coupon is removed for transportation of the carcass, it shall be in the possession of the person accompanying the carcass at all times.

Section 12. Retrieval of Edible Portions. No person shall take and leave, abandon, or allow any wild bison, or edible portion to intentionally or needlessly go to waste. The failure of any person to properly dress and care for any wild bison killed by that person and if the carcass is reasonably accessible, within forty-eight (48) hours to take or transport the carcass to the camp of that person, and to properly care for the carcass is prima facie evidence of a violation of this section.



Section 13. Wearing of Fluorescent Orange Clothing. No person shall hunt any wild bison without wearing in a visible manner one (1) or more exterior garments, which shall include a hat, shirt, jacket, coat, vest or sweater of a fluorescent orange color.

Section 14. Transportation And Exportation.

(a) No person shall ship, transport, or receive for shipment or transportation within Wyoming, any wild bison or part thereof, unless tagged with a Wyoming interstate game tag, or unless:

(i) The transportation is by a person accompanying the carcass of a wild bison who is in possession of a proper coupon.

(b) No wild bison or any part thereof shall be shipped or transported from the State unless accompanied by the licensee who harvested the animal, in possession of a proper coupon, or unless:

(i) The part to be exported from the state is of a nonedible trophy or hidelike nature and properly tagged with a Wyoming interstate game tag.

(ii) The wild bison was legally harvested by a nonresident and is tagged with a Wyoming interstate game tag.

Section 15. Hunting Regulations.

(a) Shooting Hours. Shooting hours for the hunting of wild bison shall be from one-half (1/2) hour before sunrise to one-half (1/2) hour after sunset.

(b) Within three (3) consecutive days (seventy-two (72) hours) after taking a wild bison, the licensee shall contact the Department Regional Office where the licensee obtained his/her wild bison license during business hours to report the harvest. The licensee shall report the date of the harvest, the sex, age class (adult, yearling, calf) of the bison harvested, supply biological samples as required by the Department and provide the legal description of where the bison was harvested to include section, range and township or UTM coordinates.

(c) Bag and Possession Limits. The bag and possession limit for wild bison shall be one (1) wild bison during any one (1) harvest year. No person who is issued a wild bison hunting license and who harvests a wild bison after January 31, 2001, shall be eligible to apply for or receive a hunting license for wild bison in any future year.

(d) Open Areas, Season Dates and Limitations.

| Hunt Area | Type | Date of Seasons |         | Limitations                                                                 |
|-----------|------|-----------------|---------|-----------------------------------------------------------------------------|
|           |      | Opens           | Closes  |                                                                             |
| 1, 2      | 1    | July 1          | Jan. 31 | Any male Wild Bison; other limitations specified during notification        |
|           | 2    | July 1          | Jan. 31 | Any female/calf Wild Bison; other limitations specified during notification |
| 2         | 3    | Sept. 1         | Nov. 30 | Any male Wild Bison; other limitations specified during notification        |
| 2         | 4    | Sept. 1         | Nov. 30 | Any female/calf Wild Bison; other limitations specified during notification |

Section 16. Hunt Area Descriptions.

(a) Area and Number.

Area 1. Absaroka. All lands within Park, Hot Springs, Fremont, Sublette and Teton Counties east of the Continental Divide, excluding lands administered by the Wind River Indian Reservation and Yellowstone National Park.

Area 2. Jackson. All lands within Lincoln, Sublette, Fremont and Teton Counties west of the Continental Divide, excluding Grand Teton National Park, John D. Rockefeller Jr. Memorial Parkway, Yellowstone National Park and the National Elk Refuge.

Section 17. Violation of Commission Regulations. Failure to abide by the provisions of this regulation shall be punishable as provided by Wyoming statutes for violation of Commission regulations.

Section 18. Savings Clause. If any provision of this regulation shall be held to be illegal or unconstitutional, such a ruling shall not affect other provisions of this regulation which can be given effect without the illegal or unconstitutional provision; and, to this end, the provisions of this regulation shall be severable.

WYOMING GAME AND FISH COMMISSION

By:

M. Hale Kreycik, President

Date: July 15, 2004

## WYOMING GAME AND FISH COMMISSION

### CHAPTER 15

#### WILD BISON RECREATIONAL HUNTING SEASON

##### EMERGENCY RULE

**(For the 120 days the emergency rules are in effect, the following rules shall apply. Emergency rules are no longer in effect 120 days after filing with the Secretary of State.)**

Section 1. Authority. This regulation is promulgated by authority of W.S. §23-1-101, §23-1-302 and §23-2-107.

Section 2. Regulation. The Wyoming Game and Fish Commission hereby adopts the following regulation governing wild bison recreational hunting seasons. This regulation shall remain in effect until modified or repealed by the Commission.

Section 3. Definitions. For the purpose of this regulation, definitions shall be as set forth in Title 23, Wyoming Statutes, and the Commission also adopts the following definitions:

(a) "Edible portions" means the meat of the front quarters as far down as the knees, the meat of the hindquarters as far down as the hocks, and the meat along the backbone between the neck and hindquarters, excluding meat on the ribs and neck.

(b) "Harvest year" means seven (7) consecutive months beginning July 1 of each year through January 31 of the next succeeding year.

Section 4. Recreational Hunting Season Established And Effective Date. When the Department determines a wild bison recreational hunting opportunity exists, there shall be a wild bison recreational hunting season as established in accordance with Section 5 through Section 19 of this regulation.

Section 5. Supervision Of Licensees. Wild bison recreational hunting may be done under the supervision and/or direction of Department personnel.

Section 6. Notification.

(a) Applicants shall be notified of their placement on the wild bison priority list by the Department. Applicants on the wild bison priority list shall also be notified by mail or by telephone, in order of their priority ranking, when the Department determines a wild bison recreational hunting opportunity may exist. If telephone calls are made, the calls shall be done by the Department during the evening hours between 4:00 p.m. and 10:00 p.m. If telephone calls are made, a minimum of three (3) attempts by telephone shall be made that evening and the subsequent evening to contact and notify any individual applicant. Notification attempts shall be spaced at a minimum of one-half (½) hour intervals. Department personnel must speak directly to the applicant during the notification call. If an individual cannot be contacted, the next individual on the list shall be notified and those who could not be contacted shall retain their positions on the wild bison priority list. An applicant who declines participation shall have his/her name removed from the wild bison priority list.

(b) At the Department's discretion, notification may be made by mail. The Department shall send notification by first-class mail to the address listed on the applicant's application for placement on the wild bison

priority list. The notification shall be mailed a minimum of ten (10) days immediately prior to the scheduled wild bison hunting season.

(c) Applicants shall be advised during the notification call or by mail of: the date, time, and location of their scheduled wild bison recreational hunt. Applicants contacted may have an opportunity to receive a permit valid for hunting wild bison on the National Elk Refuge.

Section 7. Selection Of Bison To Be Harvested.

(a) Hunters may be directed by Department personnel to take a specific age class of wild bison in a specific geographic portion of a hunt area and during a specific time period in order to meet the Department's management objectives. Numbers and age classes of wild bison available when the applicant arrives may differ from those available at the time of the notification call or letter. Issuance of a wild bison license provides the licensee an opportunity to hunt a wild bison; it does not guarantee that a licensee shall harvest a wild bison.

Section 8. Wild Bison Hunting Orientation Information.

(a) After notification, individuals interested in participating in the wild bison recreational hunting season shall be provided wild bison hunting orientation information in a manner determined by the Department.

Section 9. Firearms. Wild bison shall only be taken with a firearm which has a barrel bore diameter of at least twenty-seven hundredths (27/100) of an inch and is chambered to fire a center-fire cartridge not less than two (2) inches in overall length, including a soft or expanding point bullet seated to a normal depth. The cartridge shall have a minimum of a one hundred fifty (150) grain bullet.

Section 10. Licensing. Licenses shall be issued upon payment by the applicant of the proper license fee at the Department Regional Office administering the wild bison recreational hunt. A license must be purchased prior to participating in the wild bison recreational hunt. A conservation stamp shall be in possession of the licensee while exercising the privileges under the wild bison license.

Section 11. National Elk Refuge Permits. A National Elk Refuge permit is required prior to hunting wild bison on the National Elk Refuge and shall be in possession of the hunter while hunting wild bison on the National Elk Refuge. A limited number of permits shall be available to hunt wild bison on the National Elk Refuge. Permits shall be issued by the Department to licensed wild bison hunters in the order of their placement on the wild bison priority list, and shall be valid only for specified dates.

Section 12. Tagging Requirements. When any wild bison is killed under a license, the licensee shall detach, sign and date the carcass coupon and attach the coupon to the carcass before leaving the site of the kill. The coupon shall remain on the wild bison carcass at all times until the meat undergoes processing, except that during transportation of the carcass the coupon may be removed to prevent its loss. If the coupon is removed for transportation of the carcass, it shall be in the possession of the person accompanying the carcass at all times.

Section 13. Retrieval of Edible Portions. No person shall take and leave, abandon, or allow any wild bison, or edible portion to intentionally or needlessly go to waste. The failure of any person to properly dress and care for any wild bison killed by that person and if the carcass is reasonably accessible, within forty-eight (48) hours to take or transport the carcass to the camp of that person, and to properly care for the carcass is prima facie evidence of a violation of this section.

Section 14. Wearing of Fluorescent Orange Clothing. No person shall hunt any wild bison without wearing in a visible manner one (1) or more exterior garments, which shall include a hat, shirt, jacket, coat, vest or sweater of a fluorescent orange color.

Section 15. Transportation And Exportation.

(a) No person shall ship, transport, or receive for shipment or transportation within Wyoming, any wild bison or part thereof, unless tagged with a Wyoming interstate game tag, or unless:

(i) The transportation is by a person accompanying the carcass of a wild bison who is in possession of a proper coupon.

(b) No wild bison or any part thereof shall be shipped or transported from the State unless accompanied by the licensee who harvested the animal, in possession of a proper coupon, or unless:

(i) The part to be exported from the state is of a nonedible trophy or hidelike nature and properly tagged with a Wyoming interstate game tag.

(ii) The wild bison was legally harvested by a nonresident and is tagged with a Wyoming interstate game tag.

Section 16. Hunting Regulations.

(a) Shooting Hours. Shooting hours for the hunting of wild bison shall be from one-half (1/2) hour before sunrise to one-half (1/2) hour after sunset.

(b) Within three (3) consecutive days (seventy-two (72) hours) after taking a wild bison, the licensee shall contact the Department Regional Office where the licensee obtained his/her wild bison license during business hours to report the harvest. The licensee shall report the date of the harvest, the sex, age class (adult, yearling, calf) of the bison harvested, supply biological samples as required by the Department and provide the legal description of where the bison was harvested to include section, range and township or UTM coordinates.

(c) Bag and Possession Limits. The bag and possession limit for wild bison shall be one (1) wild bison during any one (1) harvest year. No person who is issued a wild bison hunting license and who harvests a wild bison after January 31, 2001, shall be eligible to apply for or receive a hunting license for wild bison in any future year.

(d) Open Areas, Season Dates and Limitations.

| Hunt Area | Type | Date of Seasons |         | Limitations                                                                 |
|-----------|------|-----------------|---------|-----------------------------------------------------------------------------|
|           |      | Opens           | Closes  |                                                                             |
| 1, 2      | 1    | July 1          | Jan. 31 | Any male Wild Bison; other limitations specified during notification        |
|           | 2    | July 1          | Jan. 31 | Any female/calf Wild Bison; other limitations specified during notification |
| 2         | 3    | Sept. 1         | Nov. 30 | Any male Wild Bison; other limitations specified during notification        |
| 2         | 4    | Sept. 1         | Nov. 30 | Any female/calf Wild Bison; other limitations specified during notification |

Section 17. Hunt Area Descriptions.

(a) Area and Number.

Area 1. Absaroka. All lands within Park, Hot Springs, Fremont, Sublette and Teton Counties east of the Continental Divide, excluding lands administered by the Wind River Indian Reservation and Yellowstone National Park.

Area 2. Jackson. All lands within Lincoln, Sublette, Fremont and Teton Counties west of the Continental Divide, excluding Grand Teton National Park, John D. Rockefeller Jr. Memorial Parkway and Yellowstone National Park.

Section 18. Violation of Commission Regulations. Failure to abide by the provisions of this regulation shall be punishable as provided by Wyoming statutes for violation of Commission regulations.

Section 19. Savings Clause. If any provision of this regulation shall be held to be illegal or unconstitutional, such a ruling shall not affect other provisions of this regulation which can be given effect without the illegal or unconstitutional provision; and, to this end, the provisions of this regulation shall be severable.

WYOMING GAME AND FISH COMMISSION

By:

Bill Williams, DVM, President

Date: August 14, 2007

# BISON 2007 HUNT AREAS

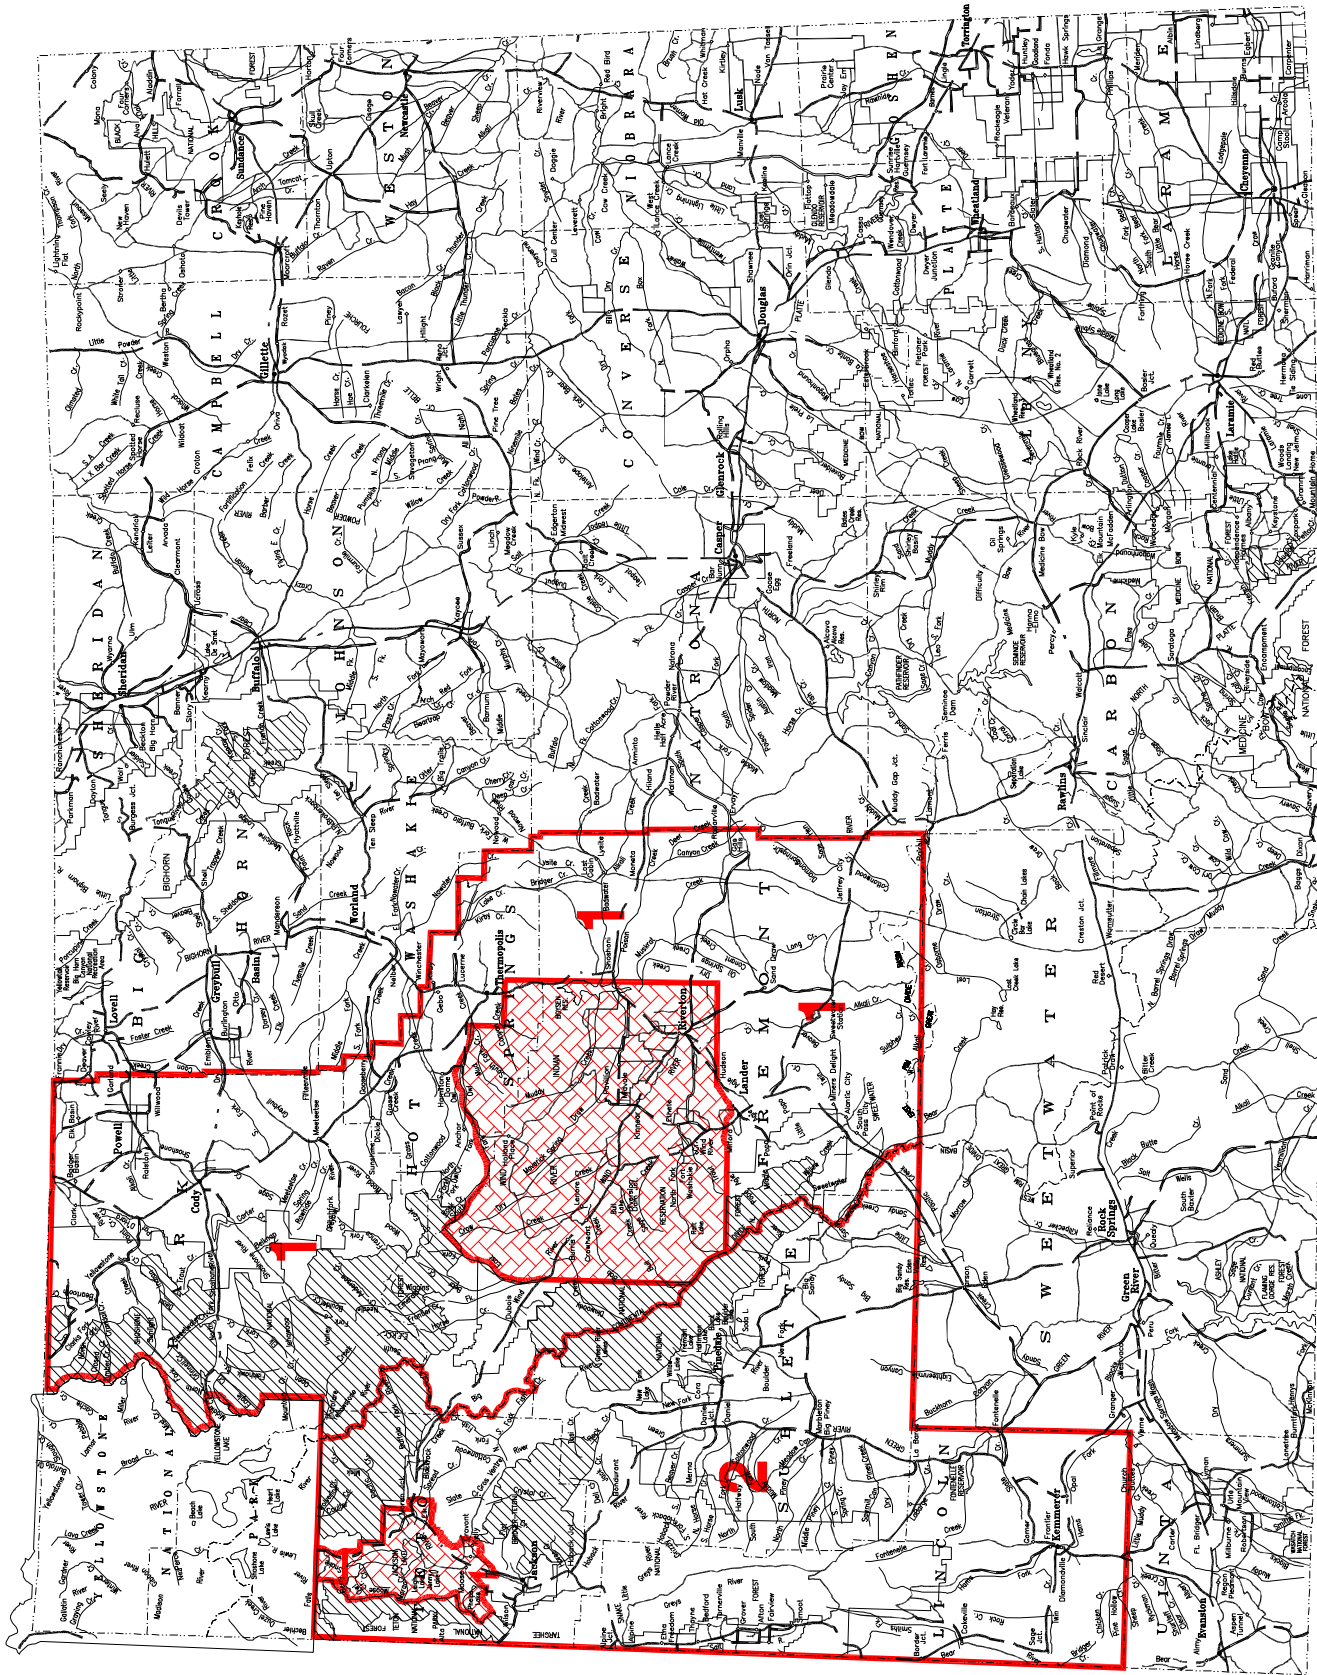

These areas closed to hunting.

THIS MAP IS FOR GENERAL REFERENCE ONLY. Please use the written boundary descriptions in this regulation for detailed boundary information.

Note: Wilderness area, nonresidents must have guides.





TABLE I  
**BLACK BEAR**  
HUNTS, RECREATION DAYS, HUNTER DAYS PER BEAR  
2007

| AREA                 | SPRING  |      |         | FALL    |      |         | TOTAL   |       |      |         | Hunter<br>Days/<br>Bear |
|----------------------|---------|------|---------|---------|------|---------|---------|-------|------|---------|-------------------------|
|                      | Hunters | Days | Harvest | Hunters | Days | Harvest | Hunters | Hunts | Days | Harvest |                         |
| 1. Northwest Bighorn |         |      |         |         |      |         |         |       |      |         |                         |
| Resident             | 78      | 590  | 7       | 25      | 178  | 1       | 88      | 103   | 768  | 8       | 96.0                    |
| Nonresident          | 3       | 5    | 1       | 2       | 18   | 0       | 5       | 5     | 23   | 1       | 23.0                    |
| Total                | 81      | 595  | 8       | 27      | 196  | 1       | 93      | 108   | 791  | 9       | 87.9                    |
| 2. Burgess Junction  |         |      |         |         |      |         |         |       |      |         |                         |
| Resident             | 57      | 328  | 5       | 31      | 235  | 2       | 76      | 88    | 563  | 7       | 80.4                    |
| Nonresident *        | 8       | 33   | 3       | 2       | 8    | 3       | 10      | 10    | 41   | 6       | 6.8                     |
| Total                | 65      | 361  | 8       | 33      | 243  | 5       | 86      | 98    | 604  | 13      | 46.5                    |
| 3. Paint Rock        |         |      |         |         |      |         |         |       |      |         |                         |
| Resident             | 22      | 112  | 2       | 12      | 102  | 0       | 29      | 34    | 214  | 2       | 107.0                   |
| Nonresident *        | 2       | 8    | 0       | 0       | 0    | 1       | 2       | 2     | 8    | 1       | 8.0                     |
| Total                | 24      | 120  | 2       | 12      | 102  | 1       | 31      | 36    | 222  | 3       | 74.0                    |
| 4. Story             |         |      |         |         |      |         |         |       |      |         |                         |
| Resident             | 57      | 269  | 6       | 29      | 269  | 0       | 76      | 86    | 538  | 6       | 89.7                    |
| Nonresident          | 10      | 44   | 1       | 2       | 8    | 0       | 10      | 12    | 52   | 1       | 52.0                    |
| Total                | 67      | 313  | 7       | 31      | 277  | 0       | 86      | 98    | 590  | 7       | 84.3                    |
| 5. Upper Nowood      |         |      |         |         |      |         |         |       |      |         |                         |
| Resident             | 12      | 257  | 0       | 2       | 4    | 0       | 12      | 14    | 261  | 0       | 0.0                     |
| Nonresident          | 0       | 0    | 0       | 0       | 0    | 0       | 0       | 0     | 0    | 0       | 0.0                     |
| Total                | 12      | 257  | 0       | 2       | 4    | 0       | 12      | 14    | 261  | 0       | 0.0                     |
| 6. Mayoworth         |         |      |         |         |      |         |         |       |      |         |                         |
| Resident             | 12      | 251  | 2       | 16      | 75   | 0       | 22      | 28    | 326  | 2       | 163.0                   |
| Nonresident *        | 0       | 0    | 2       | 2       | 7    | 0       | 2       | 2     | 7    | 2       | 3.5                     |
| Total                | 12      | 251  | 4       | 18      | 82   | 0       | 24      | 30    | 333  | 4       | 83.3                    |
| 7. Laramie Peak      |         |      |         |         |      |         |         |       |      |         |                         |
| Resident             | 41      | 228  | 7       | 37      | 314  | 7       | 69      | 78    | 542  | 14      | 38.7                    |
| Nonresident          | 3       | 7    | 0       | 5       | 33   | 1       | 8       | 8     | 40   | 1       | 40.0                    |
| Total                | 44      | 235  | 7       | 42      | 347  | 8       | 77      | 86    | 582  | 15      | 38.8                    |
| 8. Snowy Range       |         |      |         |         |      |         |         |       |      |         |                         |
| Resident             | 106     | 600  | 10      | 59      | 208  | 4       | 139     | 165   | 808  | 14      | 57.7                    |
| Nonresident          | 18      | 91   | 5       | 8       | 33   | 3       | 24      | 26    | 124  | 8       | 15.5                    |
| Total                | 124     | 691  | 15      | 67      | 241  | 7       | 163     | 191   | 932  | 22      | 42.4                    |
| 9. Sierra Madre      |         |      |         |         |      |         |         |       |      |         |                         |
| Resident             | 75      | 677  | 14      | 102     | 800  | 6       | 149     | 177   | 1477 | 20      | 73.9                    |
| Nonresident          | 11      | 51   | 5       | 8       | 31   | 1       | 16      | 19    | 82   | 6       | 13.7                    |
| Total                | 86      | 728  | 19      | 110     | 831  | 7       | 165     | 196   | 1559 | 26      | 60.0                    |

\*NOTE: Number of hunters estimated from survey data is lower than actual harvest data provided by WY Game and Fish.

TABLE I (Continued)

**BLACK BEAR** SPRING FALL REPORT

| AREA                         | SPRING  |      |         | FALL    |      |         | TOTAL   |       |      |         | Hunter<br>Days/<br>Bear |
|------------------------------|---------|------|---------|---------|------|---------|---------|-------|------|---------|-------------------------|
|                              | Hunters | Days | Harvest | Hunters | Days | Harvest | Hunters | Hunts | Days | Harvest |                         |
| <b>10. Uinta</b>             |         |      |         |         |      |         |         |       |      |         |                         |
| Resident                     | 10      | 106  | 0       | 0       | 0    | 0       | 10      | 10    | 106  | 0       | 0.0                     |
| Nonresident                  | 2       | 5    | 0       | 0       | 0    | 0       | 2       | 2     | 5    | 0       | 0.0                     |
| Total                        | 12      | 111  | 0       | 0       | 0    | 0       | 12      | 12    | 111  | 0       | 0.0                     |
| <b>11. Smith's Fork</b>      |         |      |         |         |      |         |         |       |      |         |                         |
| Resident                     | 71      | 637  | 8       | 84      | 663  | 2       | 131     | 155   | 1300 | 10      | 130.0                   |
| Nonresident                  | 7       | 29   | 0       | 8       | 54   | 1       | 13      | 15    | 83   | 1       | 83.0                    |
| Total                        | 78      | 666  | 8       | 92      | 717  | 3       | 144     | 170   | 1383 | 11      | 125.7                   |
| <b>13. Lander</b>            |         |      |         |         |      |         |         |       |      |         |                         |
| Resident                     | 82      | 830  | 8       | 41      | 406  | 0       | 102     | 123   | 1236 | 8       | 154.5                   |
| Nonresident                  | 0       | 0    | 0       | 0       | 0    | 0       | 0       | 0     | 0    | 0       | 0.0                     |
| Total                        | 82      | 830  | 8       | 41      | 406  | 0       | 102     | 123   | 1236 | 8       | 154.5                   |
| <b>14. South Piney</b>       |         |      |         |         |      |         |         |       |      |         |                         |
| Resident                     | 73      | 426  | 6       | 51      | 318  | 4       | 110     | 124   | 744  | 10      | 74.4                    |
| Nonresident                  | 0       | 0    | 0       | 0       | 0    | 0       | 0       | 0     | 0    | 0       | 0.0                     |
| Total                        | 73      | 426  | 6       | 51      | 318  | 4       | 110     | 124   | 744  | 10      | 74.4                    |
| <b>15. Piney-Horse Creek</b> |         |      |         |         |      |         |         |       |      |         |                         |
| Resident                     | 24      | 177  | 2       | 41      | 324  | 1       | 61      | 65    | 501  | 3       | 167.0                   |
| Nonresident                  | 2       | 7    | 0       | 7       | 42   | 0       | 8       | 9     | 49   | 0       | 0.0                     |
| Total                        | 26      | 184  | 2       | 48      | 366  | 1       | 69      | 74    | 550  | 3       | 183.3                   |
| <b>16. Greys River</b>       |         |      |         |         |      |         |         |       |      |         |                         |
| Resident                     | 31      | 163  | 2       | 65      | 331  | 10      | 82      | 96    | 494  | 12      | 41.2                    |
| Nonresident                  | 15      | 52   | 7       | 5       | 31   | 1       | 20      | 20    | 83   | 8       | 10.4                    |
| Total                        | 46      | 215  | 9       | 70      | 362  | 11      | 102     | 116   | 577  | 20      | 28.9                    |
| <b>17. Hoback</b>            |         |      |         |         |      |         |         |       |      |         |                         |
| Resident                     | 35      | 206  | 5       | 61      | 335  | 5       | 88      | 96    | 541  | 10      | 54.1                    |
| Nonresident                  | 7       | 24   | 1       | 16      | 98   | 2       | 21      | 23    | 122  | 3       | 40.7                    |
| Total                        | 42      | 230  | 6       | 77      | 433  | 7       | 109     | 119   | 663  | 13      | 51.0                    |
| <b>18. Fall Creek</b>        |         |      |         |         |      |         |         |       |      |         |                         |
| Resident                     | 29      | 218  | 2       | 22      | 196  | 0       | 45      | 51    | 414  | 2       | 207.0                   |
| Nonresident                  | 20      | 73   | 6       | 7       | 21   | 0       | 23      | 27    | 94   | 6       | 15.7                    |
| Total                        | 49      | 291  | 8       | 29      | 217  | 0       | 68      | 78    | 508  | 8       | 63.5                    |
| <b>19. Green River</b>       |         |      |         |         |      |         |         |       |      |         |                         |
| Resident                     | 102     | 641  | 8       | 100     | 796  | 4       | 177     | 202   | 1437 | 12      | 119.8                   |
| Nonresident                  | 8       | 34   | 5       | 8       | 34   | 0       | 15      | 16    | 68   | 5       | 13.6                    |
| Total                        | 110     | 675  | 13      | 108     | 830  | 4       | 192     | 218   | 1505 | 17      | 88.5                    |

TABLE I (Continued)

**BLACK BEAR** SPRING FALL REPORT

| AREA               | SPRING  |      |         | FALL    |      |         | TOTAL   |       |      |         | Hunter        |
|--------------------|---------|------|---------|---------|------|---------|---------|-------|------|---------|---------------|
|                    | Hunters | Days | Harvest | Hunters | Days | Harvest | Hunters | Hunts | Days | Harvest | Days/<br>Bear |
| 20. Gros Ventre    |         |      |         |         |      |         |         |       |      |         |               |
| Resident           | 22      | 186  | 9       | 90      | 588  | 4       | 106     | 112   | 774  | 13      | 59.5          |
| Nonresident        | 23      | 78   | 4       | 7       | 49   | 3       | 29      | 30    | 127  | 7       | 18.1          |
| Total              | 45      | 264  | 13      | 97      | 637  | 7       | 135     | 142   | 901  | 20      | 45.1          |
| 21. Conant Basin   |         |      |         |         |      |         |         |       |      |         |               |
| Resident           | 25      | 196  | 7       | 22      | 178  | 1       | 41      | 47    | 374  | 8       | 46.8          |
| Nonresident *      | 2       | 3    | 4       | 3       | 18   | 3       | 5       | 5     | 21   | 7       | 3.0           |
| Total              | 27      | 199  | 11      | 25      | 196  | 4       | 46      | 52    | 395  | 15      | 26.3          |
| 22. Pacific Creek  |         |      |         |         |      |         |         |       |      |         |               |
| Resident           | 12      | 75   | 1       | 33      | 182  | 2       | 39      | 45    | 257  | 3       | 85.7          |
| Nonresident        | 0       | 0    | 0       | 2       | 8    | 0       | 2       | 2     | 8    | 0       | 0.0           |
| Total              | 12      | 75   | 1       | 35      | 190  | 2       | 41      | 47    | 265  | 3       | 88.3          |
| 23. Ramshorn       |         |      |         |         |      |         |         |       |      |         |               |
| Resident           | 14      | 104  | 0       | 35      | 218  | 3       | 47      | 49    | 322  | 3       | 107.3         |
| Nonresident        | 2       | 10   | 0       | 2       | 8    | 0       | 3       | 4     | 18   | 0       | 0.0           |
| Total              | 16      | 114  | 0       | 37      | 226  | 3       | 50      | 53    | 340  | 3       | 113.3         |
| 24. Darby Creek    |         |      |         |         |      |         |         |       |      |         |               |
| Resident           | 12      | 135  | 0       | 16      | 108  | 1       | 24      | 28    | 243  | 1       | 243.0         |
| Nonresident        | 5       | 8    | 1       | 8       | 21   | 4       | 13      | 13    | 29   | 5       | 5.8           |
| Total              | 17      | 143  | 1       | 24      | 129  | 5       | 37      | 41    | 272  | 6       | 45.3          |
| 25. North Absaroka |         |      |         |         |      |         |         |       |      |         |               |
| Resident           | 104     | 630  | 7       | 98      | 792  | 1       | 153     | 202   | 1422 | 8       | 177.8         |
| Nonresident        | 7       | 44   | 0       | 2       | 7    | 1       | 7       | 9     | 51   | 1       | 51.0          |
| Total              | 111     | 674  | 7       | 100     | 799  | 2       | 160     | 211   | 1473 | 9       | 163.7         |
| 26. South Absaroka |         |      |         |         |      |         |         |       |      |         |               |
| Resident           | 45      | 249  | 3       | 75      | 526  | 7       | 100     | 120   | 775  | 10      | 77.5          |
| Nonresident        | 8       | 55   | 0       | 5       | 39   | 0       | 13      | 13    | 94   | 0       | 0.0           |
| Total              | 53      | 304  | 3       | 80      | 565  | 7       | 113     | 133   | 869  | 10      | 86.9          |
| 27. Grass Creek    |         |      |         |         |      |         |         |       |      |         |               |
| Resident           | 37      | 210  | 3       | 45      | 330  | 2       | 67      | 82    | 540  | 5       | 108.0         |
| Nonresident        | 2       | 2    | 0       | 0       | 0    | 0       | 2       | 2     | 2    | 0       | 0.0           |
| Total              | 39      | 212  | 3       | 45      | 330  | 2       | 69      | 84    | 542  | 5       | 108.4         |
| 28. Wind River     |         |      |         |         |      |         |         |       |      |         |               |
| Resident           | 22      | 151  | 4       | 24      | 218  | 3       | 37      | 46    | 369  | 7       | 52.7          |
| Nonresident        | 0       | 0    | 0       | 7       | 57   | 2       | 7       | 7     | 57   | 2       | 28.5          |
| Total              | 22      | 151  | 4       | 31      | 275  | 5       | 44      | 53    | 426  | 9       | 47.3          |

\*NOTE: Number of hunters estimated from survey data is lower than actual harvest data provided by WY Game and Fish.

TABLE I (Continued)

**BLACK BEAR** SPRING FALL REPORT

| AREA                | SPRING  |      |         | FALL    |      |         | TOTAL   |       |      |         | Hunter<br>Days/<br>Bear |
|---------------------|---------|------|---------|---------|------|---------|---------|-------|------|---------|-------------------------|
|                     | Hunters | Days | Harvest | Hunters | Days | Harvest | Hunters | Hunts | Days | Harvest |                         |
| 29. Spread Creek    |         |      |         |         |      |         |         |       |      |         |                         |
| Resident            | 22      | 265  | 1       | 22      | 106  | 0       | 39      | 44    | 371  | 1       | 371.0                   |
| Nonresident         | 3       | 26   | 0       | 5       | 23   | 0       | 8       | 8     | 49   | 0       | 0.0                     |
| Total               | 25      | 291  | 1       | 27      | 129  | 0       | 47      | 52    | 420  | 1       | 420.0                   |
| 30. Star Valley     |         |      |         |         |      |         |         |       |      |         |                         |
| Resident            | 69      | 551  | 4       | 61      | 412  | 3       | 104     | 130   | 963  | 7       | 137.6                   |
| Nonresident         | 8       | 23   | 1       | 2       | 8    | 0       | 10      | 10    | 31   | 1       | 31.0                    |
| Total               | 77      | 574  | 5       | 63      | 420  | 3       | 114     | 140   | 994  | 8       | 124.3                   |
| 31. Crowheart Butte |         |      |         |         |      |         |         |       |      |         |                         |
| Resident            | 2       | 20   | 0       | 4       | 35   | 0       | 6       | 6     | 55   | 0       | 0.0                     |
| Nonresident         | 0       | 0    | 0       | 2       | 3    | 0       | 2       | 2     | 3    | 0       | 0.0                     |
| Total               | 2       | 20   | 0       | 6       | 38   | 0       | 8       | 8     | 58   | 0       | 0.0                     |
| 32. Cody            |         |      |         |         |      |         |         |       |      |         |                         |
| Resident            | 35      | 269  | 3       | 55      | 375  | 4       | 75      | 90    | 644  | 7       | 92.0                    |
| Nonresident         | 5       | 11   | 0       | 2       | 7    | 0       | 7       | 7     | 18   | 0       | 0.0                     |
| Total               | 40      | 280  | 3       | 57      | 382  | 4       | 82      | 97    | 662  | 7       | 94.6                    |

TABLE II  
**BLACK BEAR**  
 STATEWIDE TOTALS  
 2007

|             | LICENSES<br>SOLD | SPRING  |       |         | FALL    |       |         | TOTAL   |       |       |         | Hunter<br>Days/<br>Bear |
|-------------|------------------|---------|-------|---------|---------|-------|---------|---------|-------|-------|---------|-------------------------|
|             |                  | Hunters | Days  | Harvest | Hunters | Days  | Harvest | Hunters | Hunts | Days  | Harvest |                         |
| Resident    | 2965             | 1224    | 9757  | 136     | 1210    | 9622  | 77      | 1981    | 2434  | 19379 | 213     | 91.0                    |
| Nonresident | 282              | 161     | 723   | 46      | 114     | 666   | 26      | 254     | 275   | 1389  | 72      | 19.3                    |
| Total       | 3247             | 1385    | 10480 | 182     | 1324    | 10288 | 103     | 2235    | 2709  | 20768 | 285     | 72.9                    |

TABLE III  
**BLACK BEAR LICENSE DATA SUMMARY**  
 2007

|             | LICENSES<br>SOLD | NUMBER<br>SURVEYED | NUMBER USABLE<br>(hunters and<br>nonhunters) | RESPONSE<br>RATE (#<br>USABLE/#<br>SURVEYED) |
|-------------|------------------|--------------------|----------------------------------------------|----------------------------------------------|
| Resident    | 2965             | 2901               | 1507                                         | 51.9%                                        |
| Nonresident | 282              | 277                | 173                                          | 62.5%                                        |
| Total       | 3247             | 3178               | 1680                                         | 52.9%                                        |

BLACK BEAR  
HARVEST BY HARVEST TOOL  
2007

---

---

|         |         |               |
|---------|---------|---------------|
| ARCHERY | FIREARM | MUZZLE LOADER |
| 17.32%  | 79.78%  | 2.90%         |

---

---

## WYOMING GAME AND FISH COMMISSION

### CHAPTER 3

#### BLACK BEAR HUNTING SEASONS

Section 1. Authority. This regulation is promulgated by authority of W.S. §23-1-302 and W.S. §23-2-104.

Section 2. Definitions. For the purpose of this regulation, definitions shall be as set forth in Title 23, Wyoming Statutes and the Commission also adopts the following definitions:

(a) “Baiting” means placing or utilizing a processed bait or an unprocessed bait as a lure or attractant for the purpose of taking black bear.

(b) “Cub” means any black bear less than one (1) year old.

(c) “Immediately” means following the observation of a grizzly bear using a bait, the person registering the bait, the person placing the bait and/or the person hunting over the bait shall report, without delay, said use to the Wyoming Game and Fish Department and/or the U.S. Fish and Wildlife Service; immediately also means any person taking a grizzly bear shall report, without delay, to the Wyoming Game and Fish Department and/or to the U.S. Fish and Wildlife Service in accordance with Section 12 of this regulation.

(d) “Mortality” means any legal or illegal human caused female black bear death, excluding female black bears taken by the Department, known female natural mortalities, and accidental female black bear deaths.

(e) “Processed bait” means a nontoxic biodegradable substance. A chemical used as an attractant or mask rather than for consumption shall not be considered bait.

(f) “Prohibited bait” means big game animals, small game animals, game birds, game fish, protected animals, protected birds, or parts thereof.

(g) “Unprocessed bait” means livestock or livestock parts that have not been processed for human consumption, or wildlife or wildlife parts that are not otherwise prohibited in Section 2(f). A chemical used as an attractant or mask rather than for consumption shall not be considered bait.

(h) “Water” means permanent rivers, streams, lakes or ponds.

Section 3. Hunting Seasons Established. There shall be open seasons for the hunting of black bear as set forth in the Hunting Regulations (Section 4); Registration, Number, Placement, Removal and Identification of Baits on Federal and State Lands (Section 5); Areas Opened and Areas Closed to Black Bear Baiting; Restrictions on use of Processed and Unprocessed Baits (Section 6); Reporting Use of Bait by a Grizzly Bear (Section 7); Prohibited Bait (Section 8); Area Mortality Quota Limitation (Section 9); Open areas, general and special archery season dates and limitations (Section 10); Special Archery Seasons (Section 11); Reporting Grizzly Bear Mortalities (Section 12); and Hunt Area Descriptions (Section 13) of this Chapter. This regulation shall remain in effect until modified or repealed by the Commission.

Section 4. Hunting Regulations.

(a) Open Hours for the Taking of Black Bears. Black bears shall only be taken from one-half (1/2) hour before sunrise to one-half (1/2) hour after sunset.

(b) Bag and Possession Limits. Bag and possession limits for black bear shall be one (1) black bear during any one (1) calendar year (January 1 - December 31). Hunters may take any black bear except cubs and female black bears with cubs at side.

(c) Registering Kills. Hunters taking a black bear shall retain the pelt and skull from each black bear taken for registration purposes. Even if the skull is damaged, it shall accompany the pelt. Visible external evidence of sex shall remain naturally attached to the pelt. Within three (3) days, (seventy-two (72) hours), after taking a black bear, the licensee shall present the pelt and skull to a district game warden, district wildlife biologist, or Department personnel at a Game and Fish Department Regional Office during business hours for registration. The pelt and skull shall be presented in an unfrozen condition in order to allow collection of two (2) premolar teeth to be utilized to determine the age of the black bear and to allow examination of the pelt to determine the sex of the black bear. At the time of registration, the licensee shall furnish the Department the location of the site of kill to include section, township and range, or UTM coordinates.

(i) Any person who makes a false statement on the registration form regarding the date the black bear was taken or the hunt area in which it was taken shall be in violation of this regulation. Such violation shall be punishable as provided by Title 23, Wyoming statutes for violation of Commission regulations.

Section 5. Registration, Number, Placement, Removal and Identification of Baits on Federal and State Lands. The provisions in this section shall only apply to the registration, number, placement, removal and identification of baits on federal lands and state lands, including lands owned and/or administered by the Wyoming Game and Fish Commission.

(a) Registration of bait site(s).

(i) A person may register the same bait site(s) the person registered in the previous calendar year by telephone, mail, facsimile, in person, or by a representative. A person who registers a bait site(s) for the first time shall only register in person or by a representative. A bait site shall not be transferred to another person in the same calendar year in which the bait site was registered. Bait sites that are not renewed during the preference period shall be available for registration beginning April 1.

(ii) Prior to placement of bait(s), the bait site(s) registration shall be approved by the Department.

(A) To register a bait site(s), the person or representative registering the bait site(s) shall provide all information that is required on the bait site registration form. Any person who makes a false statement on the bait site registration form shall be in violation of this regulation. Such violation shall be punishable as provided by Title 23, Wyoming statutes for violation of Commission regulations.

(B) The Department shall review the information provided on the bait site(s) registration form. If the Department approves the bait site registration, the applicant shall be furnished a copy indicating the site has been approved. The registration form shall include the name, address, telephone number and the number of the valid Wyoming Black Bear Hunting License of the person desiring to register the bait; and, the name of the person registering the bait site(s) if the registration is by a representative other than a licensed outfitter. In the case of a licensed outfitter who desires to utilize the bait for outfitting black bear hunters, the outfitter's license number shall be furnished in lieu of the number of the valid black bear hunting license. The registration form shall include the legal description of the bait site location to include the range, township, section and quarter section, or UTM coordinates. A registration form which has not been completed with all required information shall not be considered a valid registration and shall be denied by the Department.

(iii) Registrations for bait site(s) in black bear hunt areas shall be presented to the Regional Wildlife Supervisor or his designee as follows: See Section 6 for areas closed to black bear baiting and restrictions on the use of bait.

| <b>Regional Offices</b> | <b>Black Bear Hunt Areas</b>                  |
|-------------------------|-----------------------------------------------|
| Casper                  | 7                                             |
| Cody                    | 1, 3, 5, 27                                   |
| Green River             | 9, 10, 11, 19                                 |
| Jackson                 | 14, 15, 16, 17, 18, 19, 20,<br>21, 24, 29, 30 |
| Lander                  | 13, 23, 28, 31                                |
| Laramie                 | 7, 8, 9                                       |
| Pinedale                | 14, 15, 16, 17, 18, 19, 20,<br>21, 24, 29, 30 |
| Sheridan                | 2, 4, 6                                       |
|                         | Areas closed to baiting, See<br>Section 6     |

(iv) Persons who had a bait site(s) registered the previous calendar year shall have a preference period during March 1 through March 20 to register the same bait site(s). Applications to register a bait site(s) shall not be accepted by the Department prior to 8:00 a.m. March 1, or 8:00 a.m. of the first business day following March 1 if March 1 occurs on a day when the Regional Game and Fish Department Office is closed. After the preference period ending March 20, applications will be accepted only if the bait site(s) location is still available beginning April 1. Following the preference period, first time registration of a bait site(s) shall be accepted in person on a first come, first served basis. A person cannot change the bait site(s) location in the specific hunt area or any other hunt area during the calendar year for which the bait site(s) was approved by the Department.

(b) Number of black bear baits and bait density. No hunter and/or licensed outfitter shall register and/or place more than two (2) baits at any one time during the calendar year except as provided in this subsection. A person licensed in Wyoming in the current year as an outfitter shall place no more than two (2) baits per black bear hunting client at any one time during the calendar year. Bait density shall be no more than one (1) bait per section as illustrated on U.S. Forest Service or Bureau of Land Management maps.

(c) Placement and removal of baits. No person shall place a bait or hunt over a bait that is not enclosed in a rigid container(s) of wood, metal or plastic not to exceed a combined total of eight (8) cubic feet, the approximate size of a fifty-five (55) gallon drum. Holes in containers shall be smooth and not constructed to function as a trap. No person shall place a bait or hunt over a bait that has not been registered with the Department in accordance with this regulation. No person shall place a bait or hunt over a bait that is less than two-hundred (200) yards from water; less than two-hundred (200) yards from roads and/or pack trails; nor less than one-half (1/2) mile from a developed campground, picnic ground, and/or building. Upon request, persons placing bait(s) shall be required to escort the Regional Wildlife Supervisor or his designee to the bait site(s). No person shall place a bait within a hunt area more than seven (7) days prior to the opening day of the black bear special archery season as listed in Section 10 of this regulation. No person who has registered and/or placed a bait shall fail to remove all containers and bait materials within seven (7) days after the last date of the black bear hunting season within the hunt area in which the bait has been placed, as listed in Section 10 of this regulation. Baits placed in the spring season, including all containers and bait materials, shall be removed within seven (7) days after the close of the spring season. Baits placed in the fall season, including all containers and bait materials, shall be removed within seven (7) days after the close of the fall season. Burial of the bait shall be specifically prohibited and shall not constitute removal of the bait.

(d) Identification of bait site(s). The name and address of the hunter and/or the licensed outfitter registering the bait site(s) shall be legible and permanently affixed to or painted on the outside of the container(s) enclosing the bait.

#### **Section 6. Areas Opened and Areas Closed to Black Bear Baiting; Restrictions on Use of Processed and Unprocessed Baits.**

(a) All black bear hunt areas shall be open to the baiting of black bear except those hunt areas and those portions of hunt areas listed in this section.



(i) Black Bear Hunt Areas 22, 25, 26, 32 and that portion of Black Bear Hunt Area 23 on U.S. Forest Service, Bureau of Land Management, and State lands, including lands administered by the Wyoming Game and Fish Commission, shall be closed.

(ii) That portion of Black Bear Hunt Area 27 north and west of the Wood River on U.S. Forest Service, Bureau of Land Management, and State lands including lands administered by the Wyoming Game and Fish Commission, shall be closed.

(iii) That portion of Black Bear Hunt Area 28 on the Shoshone National Forest north of Pelham Lake, Pelham Lake Creek and Lava Mountain shall be closed.

(iv) That portion of Black Bear Hunt Area 7 on the Pole Mountain Unit of the Medicine Bow National Forest shall be closed.

(v) All designated Wilderness Areas in National Forests shall be closed. Hunters should check maps of designated Wilderness Areas at the Wyoming Game and Fish Department's Headquarters and/or Regional Offices.

(vi) The designated recovery area for grizzly bears shall be closed. Hunters should check maps of the recovery area for grizzly bears at the Wyoming Game and Fish Department's Headquarters and/or Regional Offices, or refer to the Wyoming Game and Fish Department's website at <http://gf.state.wy.us>.

(vii) Areas administered by the U.S. Forest Service, Bureau of Land Management and/or Wyoming Game and Fish Commission in which human access has been restricted to protect wintering wildlife shall be closed. Such areas, if not already closed by this section, shall be closed to black bear baiting during the time period for which the areas have been closed to human access.

(b) Only unprocessed baits shall be utilized for the baiting of black bears in the following black bear hunt areas and in accordance with the provisions of this regulation.

(i) Black Bear Hunt Area 18 and those portions of Hunt Areas 19, 20, 21, 23, 24, 27, 28 and 29 in which bear baiting is not excluded by Section 6 (a).

(c) Processed or unprocessed baits shall be utilized for the baiting of black bears in the following black bear hunt areas, in accordance with the provisions of this regulation.

(i) Black Bear Hunt Areas 1, 2, 3, 4, 5, 6, 7, 8, 9, 10, 11, 13, 14, 15, 16, 17, 30, 31.

Section 7. Reporting Use of Bait by a Grizzly Bear. Any person registering a bait site, placing a bait, and/or hunting at a bait site shall immediately report use of the bait by a grizzly bear to the Wyoming Game and Fish Department (1-800-442-4331) and/or the U. S. Fish and Wildlife Service. Regardless of the land status albeit federal, State, or private, no person shall hunt black bear over such a bait site for the remainder of the calendar year. The bait site(s) shall be closed for the remainder of the calendar year and the bait shall be removed as soon as possible by personnel of the Wyoming Game and Fish Department and/or U.S. Fish and Wildlife Service.

Section 8. Prohibited Bait. No person shall place any prohibited bait for the purpose of baiting black bears. Baiting for black bear with a substance other than defined as a bait in Section 2 or in a manner other than as specified in Section 5 shall be prohibited on Federal or State lands, including lands administered by the Wyoming Game and Fish Commission. Chemicals used as an attractant or mask rather than for consumption, shall not be considered bait and shall not be prohibited.

Section 9. Area Mortality Quota Limitation. The black bear hunting season shall close in each black bear hunt area or management unit when the female mortality quota specified for the respective hunt area or management unit has been reached. If the female mortality quota is not reached, the season shall close upon the date specified in Section 10. If the female mortality quotas for the spring hunting season are exceeded, the additional mortalities

shall be subtracted from the fall mortality quotas. Conversely, if female mortality quotas in the spring have not been reached, the portion of the quota remaining shall be added to the fall mortality quota. It is the hunter's responsibility to confirm that the hunt area the person intends to hunt is open. The status of hunt area closures shall be available twenty-four (24) hours a day by calling toll free **1-800-264-1280**.

Section 10. Open Areas, General and Special Archery Season Dates and Limitations.

| Black Bear Management Unit | Hunt Area          | Season Dates              |                                                                                                                      | Annual Female Mortality Quota |
|----------------------------|--------------------|---------------------------|----------------------------------------------------------------------------------------------------------------------|-------------------------------|
|                            |                    | Archery                   | General                                                                                                              |                               |
| <u>Bighorns</u>            | 1-5                | May 1-14<br>Sept. 1-14    | May 15-June 15<br>Sept. 15-Oct. 31                                                                                   | 10 Spring<br>5 Fall           |
|                            | 6                  |                           | May 1-June 15<br>Sept. 1-Oct. 31                                                                                     | 1 Spring<br>1 Fall            |
| <u>Laramie Peak</u>        | 7                  | April 15-30<br>Aug. 15-31 | May 1-June 7<br>Sept. 1-Oct. 31                                                                                      | 4 Spring<br>3 Fall            |
| <u>Snowy Range</u>         | 8                  | April 15-30<br>Sept. 1-30 | May 1-June 7<br>Oct. 1-31                                                                                            | 4 Spring<br>3 Fall            |
| <u>Sierra Madres</u>       | 9                  | April 15-30<br>Sept. 1-30 | May 1-June 15<br>Oct. 1-31                                                                                           | 4 Spring<br>3 Fall            |
| <u>Uinta</u>               | 10                 | April 15-30<br>Sept. 1-30 | May 1-June 15<br>Oct. 1-31                                                                                           | 1 Spring<br>1 Fall            |
| <u>Greys River</u>         | 11                 | April 1-30<br>Aug. 15-31  | May 1-June 15<br>Sept. 1-Nov. 15                                                                                     | 3 Spring<br>3 Fall            |
|                            | 14,15,16,17,30     | April 15-30<br>Aug. 15-31 | May 1-June 15<br>Sept. 1-Nov. 15                                                                                     | 14 Spring<br>10 Fall          |
| Wind River                 | 13                 | April 15-30<br>Aug. 15-31 | May 1-June 15<br>Aug. 1-31, valid only in that portion of Area 13 within the Popo Agie Wilderness<br>Sept. 1-Oct. 31 | 3 Spring<br>2 Fall            |
|                            | 19                 | April 15-30<br>Aug. 15-31 | May 1-June 15<br>Sept. 1-Nov. 15                                                                                     | 6 Spring<br>4 Fall            |
|                            | 28                 | April 15-30<br>Aug. 1-14  | May 1-June 15<br>Aug. 15-Oct. 31                                                                                     | 3 Spring<br>3 Fall            |
|                            | 31                 | April 15-30<br>Aug. 1-14  | May 1-June 15<br>Aug. 15-Oct. 31                                                                                     | 2 Spring<br>2 Fall            |
| <u>Jackson</u>             | 18,20,21,22, 24,29 | April 15-30<br>Aug. 15-31 | May 1-June 15<br>Sept. 1-Nov. 15                                                                                     | 11 Spring<br>9 Fall           |
| <u>Absaroka</u>            | 23                 | April 15-30<br>Aug. 1-14  | May 1-June 15<br>Aug. 15-Oct. 31                                                                                     | 8 Spring*<br>10 Fall*         |
|                            | 25,26,27           | April 15-30<br>Aug. 15-31 | May 1-June 15<br>Sept. 1-Oct. 31                                                                                     |                               |
|                            | 32                 | April 15-30               | May 1-June 15<br>Aug. 1-Oct. 31                                                                                      | 2 Spring<br>3 Fall            |

**\*inclusive to areas 23, 25, 26, and 27**

Section 11. Special Archery Seasons.

(a) There shall be special archery seasons for the hunting of black bear by the use of legal archery equipment in areas as set forth in Section 10 of this Chapter.

Section 12. Reporting Grizzly Bear Mortalities. Any taking of a grizzly bear shall be reported immediately to the Wyoming Game and Fish Department, 1-800-442-4331, and/or to the U.S. Fish and Wildlife Service, Division of Law Enforcement, (307) 261-6365, or (307) 332-7607, or (307) 587-5349.

Section 13. Hunt Area Descriptions.

(a) Area and Number.

Area 1. Northwest Bighorn. Beginning where U.S. Highway 310 crosses the Wyoming-Montana state line; east along said line to the Bighorn Mountain divide; southeasterly along said divide to U.S. Highway 14 at Granite Pass; southerly then westerly along said highway to U. S. Highway 14-16-20; westerly along said highway to U.S. Highway 310; northwesterly along said highway to the Wyoming-Montana state line.

Area 2. Burgess Junction. Beginning where Interstate Highway 90 crosses the Wyoming-Montana state line; southeasterly along said highway to U.S. Highway 14 at the town of Ranchester; southwestly along said highway to the Big Horn Mountain Divide at Granite Pass; northwesterly along said divide to the Wyoming-Montana state line; easterly along said line to Interstate Highway 90.

Area 3. Paint Rock. Beginning at the town of Greybull; easterly and northerly along U.S. Highway 14 to the Bighorn Mountain Divide; southerly along said divide to Powder River Pass and U.S. Highway 16; westerly along said highway to the Canyon Creek Road (U.S.F.S. Road 25); southerly along said road to the Gold Mine Road (U.S.F.S. Road 452); southerly along said road to the Big Horn Mountain Divide Road/Hazelton Road (Johnson County Road 3); southerly along said road to the Rome Hill Road (Johnson County Road 3A-Washakie County Road 56); westerly along said road to U.S. Highway 16; westerly along said highway to U.S. Highway 20; westerly along said highway to Wyoming Highway 433; northerly along said highway to U.S. Highway 16-20; northerly along said highway to the town of Greybull.

Area 4. Story. Beginning at Interstate Highway 90 at the town of Ranchester; southeasterly along said highway to Interstate Highway 25; southerly along said highway to the Trabing Road (Johnson County Road 13); westerly along said road to Wyoming Highway 196; southerly along said highway to the Crazy Woman Canyon Road (Johnson County Road 14); westerly along said road to U.S. Highway 16; westerly along said highway to the Bighorn Mountain Divide at Powder River Pass; northwesterly along said divide to U.S. Highway 14 at Granite Pass; northeasterly along said highway to Interstate Highway 90 at the town of Ranchester.

Area 5. Upper Nowood. Beginning at the town of Ten Sleep; easterly along U.S. Highway 16 to the Rome Hill Road (Washakie County Road 56-Johnson County Road 3A); easterly along said road to the Big Horn Mountain Divide Road/Hazelton Road (Johnson County Road 3-Washakie County Road 81-Natrona County Road 109); southerly along said road to the Buffalo Creek Road (Natrona County Road 105); southwestly along said road to the Arminto Road (Natrona County Road 104); southerly along said road to Waltman and U.S. Highway 20-26; westerly along said highway to the town of Shoshoni; northerly along U.S. Highway 20 to the eastern boundary of the Wind River Indian Reservation; northerly, then westerly along said boundary to U.S. Highway 20; northerly along said highway to the town of Worland and U.S. Highway 16; easterly along said highway to the town of Ten Sleep.

Area 6. Mayoworth. Beginning at the junction of Interstate Highway 25 and the Trabing Road (Johnson County Road 13); southerly along said highway to the Midwest interchange and the Smoky Gap Road (Natrona County Road 115); westerly along said road to the Dead Horse Road (Natrona County Road 114); southwestly along said road to the Wild Horse Trail Road (Natrona County Road 113); westerly along said road to the 33 Mile Road (Natrona County Road 110); northwesterly along said road to the Buffalo Creek Road (Natrona County Road 105); southwestly along said road to the Bighorn Mountain Divide Road/Hazelton Road (Natrona County Road

109-Washakie County Road 81-Johnson County Road 3); northerly along said road to the Gold Mine Road (U.S.F.S. Road 452); northerly along said road to the Canyon Creek Road (U.S.F.S. Road 25); northerly along said road to U.S. Highway 16; easterly along said highway to the Crazy Woman Canyon Road (Johnson County Road 14); easterly along said road to Wyoming Highway 196; northerly along said highway to the Trabing Road (Johnson County Road 13); easterly along said road to Interstate Highway 25.

Area 7. Laramie Peak. Beginning at the junction of U.S. Highway 30/287 and Wyoming Highway 487 in the town of Medicine Bow; northerly and westerly along Wyoming Highway 487 to Wyoming Highway 220; southwesterly along said highway to the North Platte River; easterly and southerly down said river to Interstate Highway 25 at the City of Douglas; southerly along said highway to the Wyoming-Colorado state line; westerly along said line to U.S. Highway 287; northerly along said highway to U.S. Highway 30/287; northerly and westerly along said highway to Wyoming Highway 487 in the town of Medicine Bow.

Area 8. Snowy Range. Beginning where U.S. Highway 287 crosses the Wyoming-Colorado state line; west along said line to Wyoming Highway 230 west of the North Platte River; northerly along said highway to Wyoming Highway 130; northerly along said highway to U.S. Highway 30; easterly and southerly along said highway to U.S. Highway 287; southerly along said highway to the Wyoming-Colorado state line.

Area 9. Sierra Madre. Beginning where Wyoming Highway 789 crosses the Wyoming-Colorado state line; northerly along said highway to Interstate Highway 80; easterly along said highway to Wyoming Highway 130; southerly along said highway to Wyoming Highway 230; southeasterly along said highway to the Wyoming-Colorado state line; westerly along said line to Wyoming Highway 789.

Area 10. Uinta. Beginning where Interstate Highway 80 crosses the Wyoming-Utah state line; easterly along said highway to Wyoming Highway 414; southerly along said highway through the town of Lonetree to the Hoop Lake-Hole-in-the-Rock Road (Uinta County Road 295); southerly along said road to the Wyoming-Utah state line; westerly then northerly along said line to Interstate Highway 80.

Area 11. Smith's Fork. Beginning where Wyoming Highway 89 crosses the Wyoming-Utah state line west of Sage Junction; northerly along said line to the Wyoming-Idaho state line; northerly along said line to the divide between the Bear River and Salt River; easterly along said divide to the divide between the Salt River and Smith's Fork River; northeasterly along said divide to the divide between the Smith's Fork River and Greys River; southeasterly along said divide to LaBarge Creek; southeasterly down said creek to the Green River; southeasterly down said river to the CCC Bridge and the Lincoln-Sweetwater Road (Lincoln County Road 311); westerly along said road to Wyoming Highway 372; westerly along said highway to U.S. Highway 189; westerly then southerly along said highway to U.S. Highway 30; westerly along said highway to Wyoming Highway 89 at Sage Junction; westerly along said highway to the Wyoming-Utah state line.

Area 13. Lander. Beginning where U.S. Highway 287 crosses the south boundary of the Wind River Indian Reservation; southerly and easterly along said highway to the Sweetwater River; westerly up said river to Wyoming Highway 28; southwesterly along said highway to the Continental Divide; northwesterly along said divide to the south boundary of the Wind River Indian Reservation; easterly along said boundary to U.S. Highway 287.

Area 14. South Piney. Beginning where LaBarge Creek enters the Green River; westerly up said creek to the divide between the Green River and Greys River; northerly along said divide to the South Fork of South Cottonwood Creek; easterly down said creek to South Cottonwood Creek; easterly down said creek to Cottonwood Creek; easterly down said creek to the Green River; southerly down said river to LaBarge Creek.

Area 15. Piney-Horse Creek. Beginning where the Mesa Road (Sublette County Road 23-110) joins Wyoming Highway 351; westerly along said highway to the Green River; northerly up said river to Cottonwood Creek; westerly up said creek to South Cottonwood Creek; westerly up said creek to the South Fork of South Cottonwood Creek; westerly up said creek to the divide between the Green River and Greys River; northerly along said divide to the divide between the Green River and the Hoback River (Hoback Rim); easterly along said divide to U.S. Highway 191; southerly along said highway to the Mesa Road (Sublette County Road 23-110) at Cora Junction; southerly along said road to Wyoming Highway 351.

Area 16. Greys River. All of the drainages of Greys River, Little Greys River and the drainages south of the Snake River from Alpine east to and including Bailey Creek.

Area 17. Hoback. Beginning where U.S. Highway 191 crosses the divide between the Green River and the Hoback River (Hoback Rim); westerly along said divide to the divide between the Greys River and the Hoback River; northerly along said divide to the divide between the Greys River and Willow Creek; northerly along said divide to the divide between Bailey Creek and Willow Creek (Greyback Ridge); northerly along said divide to the divide between Bailey Creek and the Snake River; westerly along said divide to the Snake River; northerly up said river to the Hoback River; southeasterly up said river to Highway 191 at Bondurant; southerly and easterly along said highway to the divide between the Green River and the Hoback River (Hoback Rim).

Area 18. Fall Creek. Beginning where Wyoming Highway 22 crosses the Snake River; southerly and westerly down said river to the Wyoming-Idaho state line; northerly along said line to Wyoming Highway 22; easterly along said highway to the Snake River.

Area 19. Green River. Beginning at the town of Farson; northerly along U.S. Highway 191 to the divide between the Green River and the Hoback River (Hoback Rim); northerly along said divide to the divide between the Green River and the Gros Ventre River at Hodges Peak; northeasterly along said divide to the Darwin Ranch road (U.S.F.S. Road 620); easterly along said road to the Union Pass Road (U.S.F.S. Road 600); northeasterly along said road to the Continental Divide; southerly along said divide to U.S. Highway 28; southwesterly along said highway to the town of Farson.

Area 20. Gros Ventre. Beginning at the southeast corner boundary of the National Elk Refuge near the town of Jackson; northerly along the refuge boundary to the Gros Ventre River; easterly up said river to Kinky Creek; easterly up said creek to the Darwin Ranch Road (U.S.F.S. Road 620); easterly along said road to the divide between the Green River and the Gros Ventre River; southwesterly along said divide to the divide between the Green River and the Hoback River at Hodges Peak; southerly along said divide to Highway 191 at Hoback Rim; northerly and westerly along said highway to the Hoback River at Bondurant; westerly down said river to the Snake River; northerly along said river to Wyoming Highway 22; easterly along said highway to Highway 26; northerly along said highway to the National Elk Refuge boundary; easterly along said boundary to the southeast corner of the National Elk Refuge.

Area 21. Conant Basin. Beginning where U.S. Highway 26-287 intersects the south boundary of John D. Rockefeller Memorial Parkway; westerly along said boundary to the Targhee National Forest boundary; southerly along said boundary to the head of the north fork of Teton Creek; westerly down said creek to the Wyoming-Idaho state line; northerly along said line to the Yellowstone National Park boundary; easterly along said boundary to U.S. Highway 26-287; southerly along said highway to the south boundary of John D. Rockefeller Memorial Parkway.

Area 22. Pacific Creek. Beginning where U.S. Highway 26-287 intersects the Grand Teton National Park boundary; northwesterly along said boundary to the John D. Rockefeller Memorial Parkway boundary; westerly along said boundary to U.S. Highway 26-287; northerly along said highway to the Yellowstone National Park boundary; easterly along said boundary to the Continental Divide; southeasterly along said divide to U.S. Highway 26-287; westerly along said highway to the Grand Teton National Park boundary.

Area 23. Ramshorn. All of the drainage of the Wind River that lies north of U.S. Highway 287 and west of the Wind River Indian Reservation and those areas of the Spence and Moriarity Wildlife Management Area east of the East Fork of the Wind River.

Area 24. Darby Creek. Beginning at the town of Jackson; westerly along Wyoming Highway 22 to the Wyoming-Idaho state line; northerly along said line to Teton Creek; easterly along said creek to the north fork of Teton Creek; northeasterly along said creek to the Grand Teton National Park boundary; southerly and easterly along said boundary to the Snake River; northerly and southerly along said park boundary to U.S. Highway 189; southerly along said highway to Wyoming Highway 22.

Area 25. North Absaroka. Beginning where the east boundary of Yellowstone National Park crosses the Wyoming-Montana state line; easterly along said line to the Shoshone National Forest boundary; southerly along

said boundary to U.S. Highway 14-16-20; westerly along said highway to the east boundary of Yellowstone National Park; northerly along said boundary to the Wyoming-Montana state line.

Area 26. South Absaroka. Beginning where the east boundary of Yellowstone National Park crosses U.S. Highway 14-16-20; easterly along said highway to the Shoshone National Forest boundary; southerly along said boundary to the Greybull River; westerly then southerly up said river to the divide between the Greybull River and the Wind River; westerly along said divide to the divide between the South Fork of the Shoshone River and the Wind River; westerly along said divide to the Continental Divide; northwesterly along said divide to the south boundary of Yellowstone National Park; easterly then northerly along said boundary to U.S. Highway 14-16-20.

Area 27. Grass Creek. Beginning where U.S. Highway 120 crosses the Greybull River; southeasterly along said highway to U. S. Highway 20; southerly along said highway to the northern boundary of the Wind River Indian Reservation; westerly along said boundary to the divide between the Wood River and the Wind River; northwesterly along said divide to the divide between the Greybull River and the Wind River; northwesterly along said divide to the Greybull River; northerly then easterly down said river to U.S. Highway 120; and all non-Indian fee title lands in that portion of Hot Springs County within the exterior boundaries of the Wind River Indian Reservation.

Area 28. Wind River. Beginning where U.S. Highway 287 crosses the west boundary of the Wind River Indian Reservation; southerly along said boundary to the Continental Divide; northwesterly along said divide to U.S. Highway 287 at Togwotee Pass; southeasterly along said highway to the Wind River Indian Reservation boundary.

Area 29. Spread Creek. Beginning where the Grand Teton National Park boundary crosses the Gros Ventre River; northerly along said boundary to U.S. Highway 26-287; easterly along said highway to Togwotee Pass and the Continental Divide; southerly along said divide to the Union Pass Road (U.S.F.S. Road 600); southwestly along said road to the Darwin Ranch Road (U.S.F.S. Road 620); westerly along said road to Kinky Creek; westerly down said creek to the Gros Ventre River; westerly down said river to the Grand Teton National Park boundary.

Area 30. Star Valley. All of the drainage of the Salt River east of the Wyoming-Idaho state line.

Area 31. Crowheart Butte. All non-Indian owned fee title lands within the exterior boundaries of the Wind River Indian Reservation, and all lands within the Bureau of Reclamation's Riverton and Boysen Unit boundaries, and those lands within Boysen State Park south of Cottonwood Creek, west of Boysen Reservoir, and south of U.S. Highway 20-26; excluding those areas of the Spence and Moriarity Wildlife Management Area that lie east of the East Fork of the Wind River, and those lands within Hot Springs County.

Area 32. Cody. Beginning where the Shoshone National Forest boundary meets the Wyoming-Montana state line; easterly along said line to U.S. Highway 310; southeasterly along said highway to U.S. Highway 14-16-20; easterly along said highway to U.S. Highway 16-20; southerly along said highway to Wyoming Highway 433; southerly along said highway to U.S. Highway 20; southerly along said highway to U.S. Highway 120; northwesterly along said highway to the Greybull River; southwestly up said river to the Shoshone National Forest Boundary; northerly along said boundary to the Wyoming-Montana state line.

#### WYOMING GAME AND FISH COMMISSION

BY:

\_\_\_\_\_  
Ron Lovercheck, President

Dated: January 26, 2007

# BLACK BEAR HUNTING AREAS

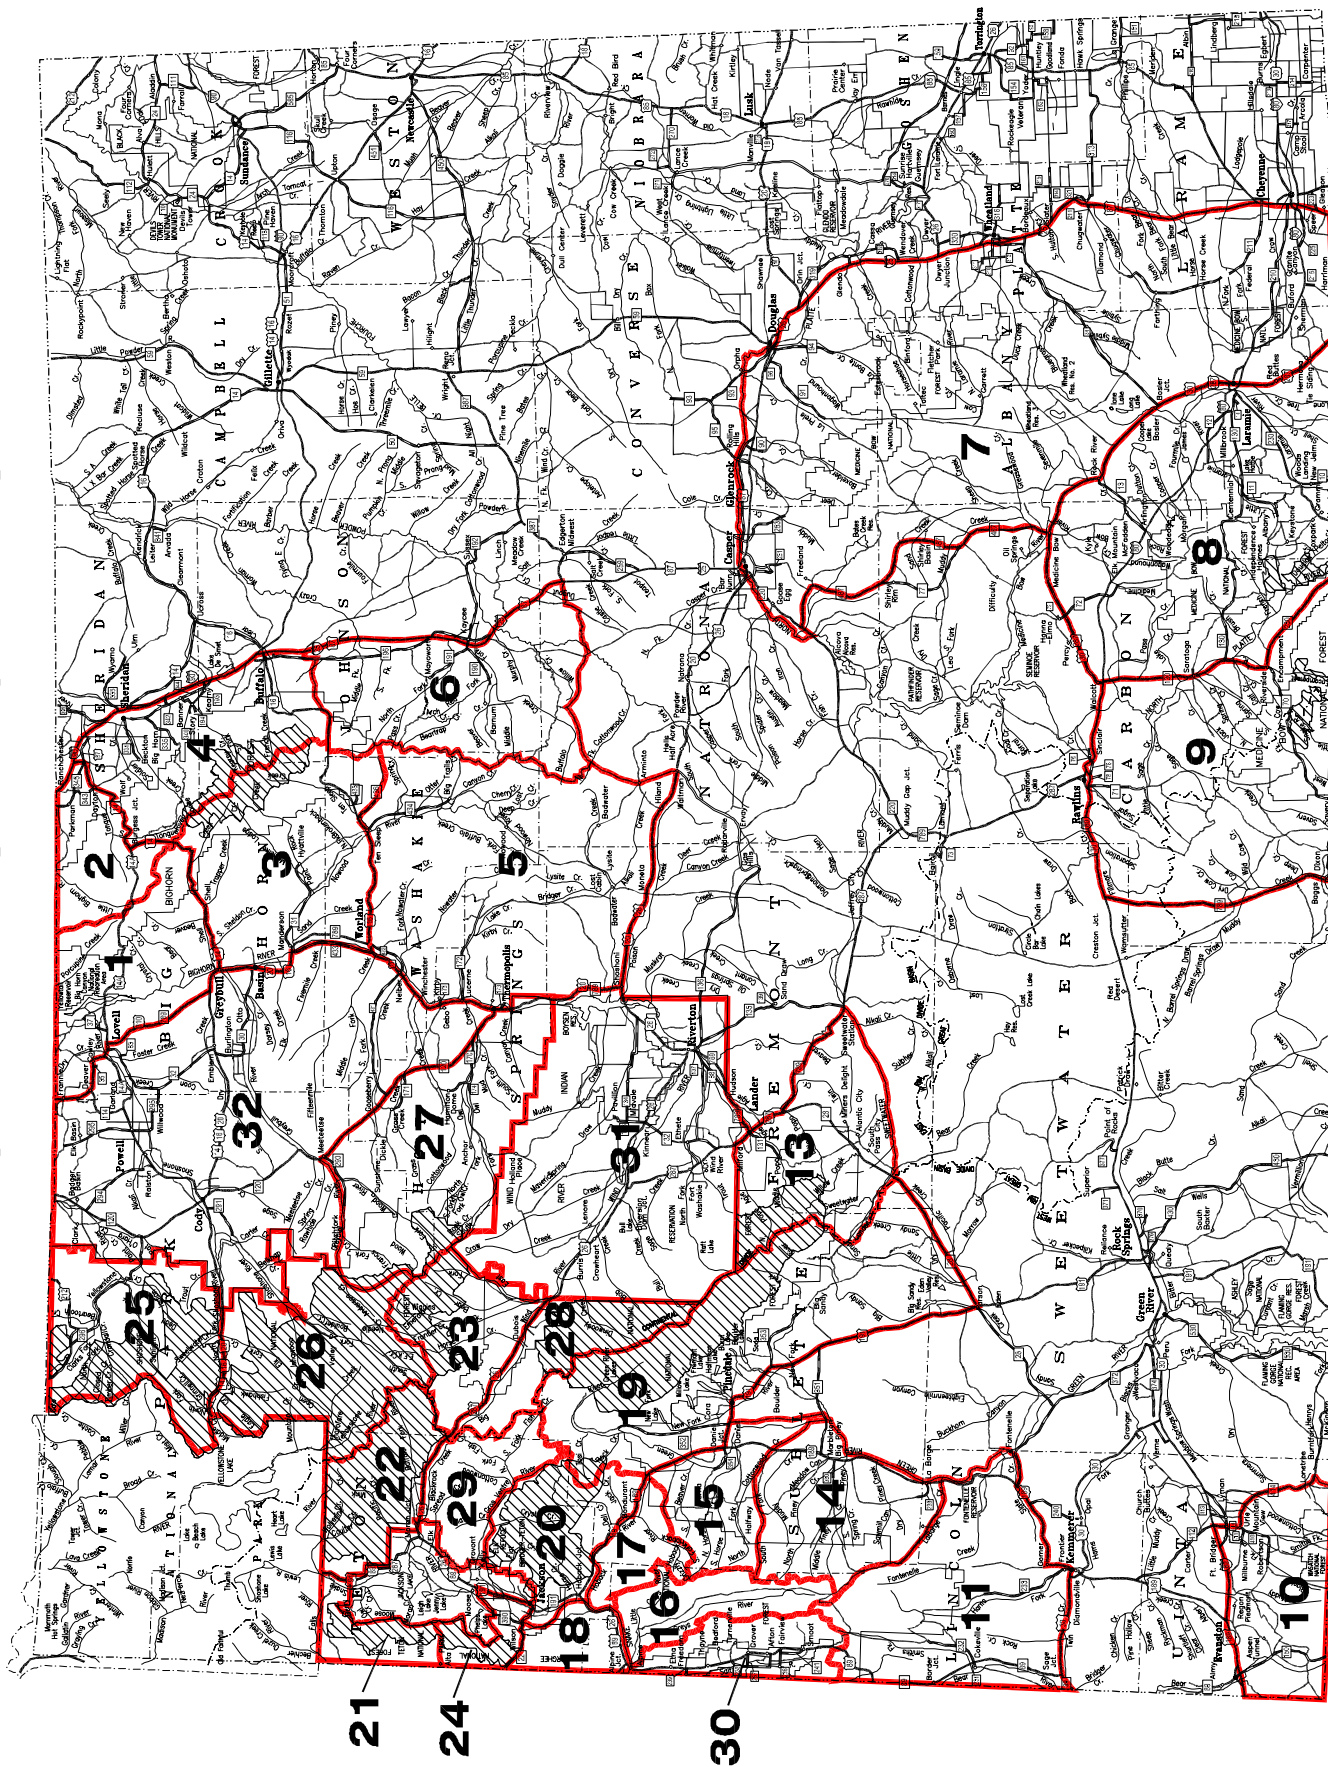

This map is for general reference only.

Note: [shaded area symbol] Wilderness area, nonresidents must have guides.





TABLE I  
**MOUNTAIN LION**  
HUNTERS, HUNTER DAYS, HARVEST, DAYS PER HARVEST,  
AND HUNTER SUCCESS RATE  
HUNT SEASON: SEPTEMBER 1, 2007–MARCH 31, 2008

| AREA                        | Hunters | Hunter Days | Harvest | Days/<br>Harvest | Hunter<br>Success |
|-----------------------------|---------|-------------|---------|------------------|-------------------|
| <b>1. Black Hills</b>       |         |             |         |                  |                   |
| Resident                    | 123     | 828         | 9       | 92.0             | 7.3%              |
| Nonresident                 | 6       | 18          | 3       | 6.0              | 50.0%             |
| Total                       | 129     | 846         | 12      | 70.5             | 9.3%              |
| <b>2. Teton</b>             |         |             |         |                  |                   |
| Resident                    | 23      | 262         | 1       | 262.0            | 4.3%              |
| Nonresident                 | 1       | 5           | 1       | 5.0              | 100.0%            |
| Total                       | 24      | 267         | 2       | 133.5            | 8.3%              |
| <b>3. Bridger</b>           |         |             |         |                  |                   |
| Resident                    | 40      | 268         | 3       | 89.3             | 7.5%              |
| Nonresident                 | 15      | 35          | 6       | 5.8              | 40.0%             |
| Total                       | 55      | 303         | 9       | 33.7             | 16.4%             |
| <b>4. Popo Agie</b>         |         |             |         |                  |                   |
| Resident                    | 19      | 122         | 4       | 30.5             | 21.1%             |
| Nonresident*                | 1       | 9           | 3       | 3.0              | —                 |
| Total                       | 20      | 131         | 7       | 18.7             | 35.0%             |
| <b>5. Iron Mountain</b>     |         |             |         |                  |                   |
| Resident                    | 35      | 322         | 4       | 80.5             | 11.4%             |
| Nonresident                 | 1       | 7           | 0       | 0.0              | 0.0%              |
| Total                       | 36      | 329         | 4       | 82.3             | 11.1%             |
| <b>6. Laramie Peak</b>      |         |             |         |                  |                   |
| Resident                    | 91      | 585         | 10      | 58.5             | 11.0%             |
| Nonresident                 | 1       | 5           | 0       | 0.0              | 0.0%              |
| Total                       | 92      | 590         | 10      | 59.0             | 10.9%             |
| <b>7. South Snowy Range</b> |         |             |         |                  |                   |
| Resident                    | 61      | 333         | 4       | 83.3             | 6.6%              |
| Nonresident                 | 6       | 15          | 3       | 5.0              | 50.0%             |
| Total                       | 67      | 348         | 7       | 49.7             | 10.4%             |
| <b>8. Seminoe</b>           |         |             |         |                  |                   |
| Resident                    | 68      | 308         | 6       | 51.3             | 8.8%              |
| Nonresident                 | 0       | 0           | 0       | 0.0              | 0.0%              |
| Total                       | 68      | 308         | 6       | 51.3             | 8.8%              |
| <b>9. Sierra Madre</b>      |         |             |         |                  |                   |
| Resident                    | 19      | 222         | 2       | 111.0            | 10.5%             |
| Nonresident*                | 2       | 7           | 4       | 1.8              | —                 |
| Total                       | 21      | 229         | 6       | 38.2             | 28.6%             |

\*NOTE: Number of hunters estimated from survey data is lower than actual harvest data provided by WY Game and Fish.

TABLE I (Continued)

**MOUNTAIN LION** HUNT SEASON: SEPTEMBER 1, 2007–MARCH 31, 2008

| AREA                     | Hunters | Hunter Days | Harvest | Days/<br>Harvest | Hunter<br>Success |
|--------------------------|---------|-------------|---------|------------------|-------------------|
| <b>10. Haystacks</b>     |         |             |         |                  |                   |
| Resident                 | 17      | 137         | 5       | 27.4             | 29.4%             |
| Nonresident              | 0       | 0           | 0       | 0.0              | 0.0%              |
| Total                    | 17      | 137         | 5       | 27.4             | 29.4%             |
| <b>11. Red Desert</b>    |         |             |         |                  |                   |
| Resident                 | 1       | 10          | 0       | 0.0              | 0.0%              |
| Nonresident              | 0       | 0           | 0       | 0.0              | 0.0%              |
| Total                    | 1       | 10          | 0       | 0.0              | 0.0%              |
| <b>12. Flaming Gorge</b> |         |             |         |                  |                   |
| Resident                 | 47      | 455         | 3       | 151.7            | 6.4%              |
| Nonresident              | 0       | 0           | 0       | 0.0              | 0.0%              |
| Total                    | 47      | 455         | 3       | 151.7            | 6.4%              |
| <b>13. Wasatch</b>       |         |             |         |                  |                   |
| Resident                 | 21      | 156         | 2       | 78.0             | 9.5%              |
| Nonresident              | 0       | 0           | 0       | 0.0              | 0.0%              |
| Total                    | 21      | 156         | 2       | 78.0             | 9.5%              |
| <b>14. Lincoln</b>       |         |             |         |                  |                   |
| Resident                 | 42      | 507         | 7       | 72.4             | 16.7%             |
| Nonresident*             | 4       | 5           | 8       | 0.6              | 0.0%              |
| Total                    | 46      | 512         | 15      | 34.1             | 32.6%             |
| <b>15. Kaycee</b>        |         |             |         |                  |                   |
| Resident                 | 106     | 505         | 22      | 23.0             | 20.8%             |
| Nonresident*             | 1       | 1           | 3       | 0.3              | —                 |
| Total                    | 107     | 506         | 25      | 20.2             | 23.4%             |
| <b>16. Gas Hills</b>     |         |             |         |                  |                   |
| Resident                 | 23      | 167         | 1       | 167.0            | 4.3%              |
| Nonresident              | 0       | 0           | 0       | 0.0              | 0.0%              |
| Total                    | 23      | 167         | 1       | 167.0            | 4.3%              |
| <b>17. Piney</b>         |         |             |         |                  |                   |
| Resident                 | 47      | 334         | 2       | 167.0            | 4.3%              |
| Nonresident              | 1       | 7           | 0       | 0.0              | 0.0%              |
| Total                    | 48      | 341         | 2       | 170.5            | 4.2%              |
| <b>18. Wind River</b>    |         |             |         |                  |                   |
| Resident                 | 17      | 120         | 2       | 60.0             | 11.8%             |
| Nonresident              | 0       | 0           | 0       | 0.0              | 0.0%              |
| Total                    | 17      | 120         | 2       | 60.0             | 11.8%             |
| <b>19. Northwest</b>     |         |             |         |                  |                   |
| Resident                 | 75      | 806         | 8       | 100.8            | 10.7%             |
| Nonresident              | 29      | 125         | 2       | 62.5             | 6.9%              |
| Total                    | 104     | 931         | 10      | 93.1             | 9.6%              |

\*NOTE: Number of hunters estimated from survey data is lower than actual harvest data provided by WY Game and Fish.

TABLE I (Continued)

**MOUNTAIN LION** HUNT SEASON: SEPTEMBER 1, 2007–MARCH 31, 2008

| AREA                       | Hunter<br>Hunters | Hunter<br>Days | Harvest | Days/<br>Harvest | Hunter<br>Success |
|----------------------------|-------------------|----------------|---------|------------------|-------------------|
| <b>20. Grass Creek</b>     |                   |                |         |                  |                   |
| Resident                   | 25                | 173            | 2       | 86.5             | 8.0%              |
| Nonresident*               | 0                 | 0              | 1       | 0.0              | —                 |
| Total                      | 25                | 173            | 3       | 57.7             | 12.0%             |
| <b>21. Shell</b>           |                   |                |         |                  |                   |
| Resident                   | 54                | 609            | 6       | 101.5            | 11.1%             |
| Nonresident                | 7                 | 29             | 5       | 5.8              | 71.4%             |
| Total                      | 61                | 638            | 11      | 58.0             | 18.0%             |
| <b>22. Ten Sleep</b>       |                   |                |         |                  |                   |
| Resident                   | 48                | 624            | 5       | 124.8            | 10.4%             |
| Nonresident*               | 1                 | 10             | 3       | 3.3              | —                 |
| Total                      | 49                | 634            | 8       | 79.3             | 16.3%             |
| <b>23. Sheridan</b>        |                   |                |         |                  |                   |
| Resident                   | 77                | 830            | 9       | 92.2             | 11.7%             |
| Nonresident*               | 4                 | 16             | 6       | 2.7              | —                 |
| Total                      | 81                | 846            | 15      | 56.4             | 18.5%             |
| <b>24. Northeast</b>       |                   |                |         |                  |                   |
| Resident                   | 36                | 323            | 4       | 80.8             | 11.1%             |
| Nonresident                | 0                 | 0              | 0       | 0.0              | 0.0%              |
| Total                      | 36                | 323            | 4       | 80.8             | 11.1%             |
| <b>25. Hartville</b>       |                   |                |         |                  |                   |
| Resident                   | 28                | 369            | 1       | 369.0            | 3.6%              |
| Nonresident                | 1                 | 4              | 0       | 0.0              | 0.0%              |
| Total                      | 29                | 373            | 1       | 373.0            | 3.4%              |
| <b>26. Greys River</b>     |                   |                |         |                  |                   |
| Resident                   | 32                | 389            | 4       | 97.3             | 12.5%             |
| Nonresident                | 4                 | 12             | 4       | 3.0              | 100.0%            |
| Total                      | 36                | 401            | 8       | 50.1             | 22.2%             |
| <b>27. Casper Mountain</b> |                   |                |         |                  |                   |
| Resident                   | 25                | 95             | 6       | 15.8             | 24.0%             |
| Nonresident                | 1                 | 2              | 0       | 0.0              | 0.0%              |
| Total                      | 26                | 97             | 6       | 16.2             | 23.1%             |
| <b>28. Crowheart Butte</b> |                   |                |         |                  |                   |
| Resident                   | 2                 | 15             | 1       | 15.0             | 50.0%             |
| Nonresident                | 0                 | 0              | 0       | 0.0              | 0.0%              |
| Total                      | 2                 | 15             | 1       | 15.0             | 50.0%             |
| <b>29. Hoback</b>          |                   |                |         |                  |                   |
| Resident                   | 33                | 157            | 2       | 78.5             | 6.1%              |
| Nonresident                | 4                 | 11             | 0       | 0.0              | 0.0%              |
| Total                      | 37                | 168            | 2       | 84.0             | 5.4%              |

\*NOTE: Number of hunters estimated from survey data is lower than actual harvest data provided by WY Game and Fish.

TABLE I (Continued)

**MOUNTAIN LION** HUNT SEASON: SEPTEMBER 1, 2007–MARCH 31, 2008

| AREA                | Hunter  |      | Days/   |         | Hunter  |
|---------------------|---------|------|---------|---------|---------|
|                     | Hunters | Days | Harvest | Harvest | Success |
| <b>30. Sundance</b> |         |      |         |         |         |
| Resident            | 57      | 456  | 6       | 76.0    | 10.5%   |
| Nonresident         | 1       | 5    | 0       | 0.0     | 0.0%    |
| Total               | 58      | 461  | 6       | 76.8    | 10.3%   |

**31. Elk Mountain**

|             |    |     |   |      |       |
|-------------|----|-----|---|------|-------|
| Resident    | 15 | 112 | 3 | 37.3 | 20.0% |
| Nonresident | 4  | 17  | 2 | 8.5  | 50.0% |
| Total       | 19 | 129 | 5 | 25.8 | 26.3% |

\*NOTE: Number of hunters estimated from survey data is lower than actual harvest data provided by WY Game and Fish.

TABLE II  
**MOUNTAIN LION**  
 STATEWIDE TOTALS  
 HUNT SEASON: SEPTEMBER 1, 2007–MARCH 31, 2008

| LICENSES SOLD |      | Hunters | Days  | Harvest | Hunter<br>Days/<br>Mt. Lion |
|---------------|------|---------|-------|---------|-----------------------------|
|               |      |         |       |         |                             |
| Resident      | 2057 | 979     | 10599 | 144     | 73.6                        |
| Nonresident   | 126  | 89      | 345   | 54      | 6.4                         |
| Total         | 2183 | 1068    | 10944 | 198     | 55.3                        |

TABLE III  
**MOUNTAIN LION LICENSE DATA SUMMARY**  
 HUNT SEASON: SEPTEMBER 1, 2007–MARCH 31, 2008

| LICENSES SOLD |      | NUMBER SURVEYED | NUMBER USABLE (hunters and nonhunters) | RESPONSE<br>RATE (#<br>USABLE/#<br>SURVEYED) |
|---------------|------|-----------------|----------------------------------------|----------------------------------------------|
|               |      |                 |                                        |                                              |
| Resident      | 2057 | 1670            | 807                                    | 48.3%                                        |
| Nonresident   | 126  | 115             | 73                                     | 63.5%                                        |
| Total         | 2183 | 1785            | 880                                    | 49.3%                                        |

TABLE IV  
**MOUNTAIN LION**  
 HARVEST BY HARVEST TOOL  
 HUNT SEASON: SEPTEMBER 1, 2007–MARCH 31, 2008

|         |         |               |
|---------|---------|---------------|
| ARCHERY | FIREARM | MUZZLE LOADER |
| 15.29%  | 83.78%  | 0.94%         |

# WYOMING GAME AND FISH COMMISSION

## CHAPTER 42

### MOUNTAIN LION HUNTING SEASONS

Section 1. Authority. This regulation is promulgated by authority of W.S. §23-1-302 and W.S. §23-2-101(d).

Section 2. Definitions. For the purpose of this regulation, definitions shall be as set forth in Title 23, Wyoming Statutes and the Commission also adopts the following definitions:

(a) “Biological year” means twelve (12) consecutive months from September 1 to August 31.

(b) “Kitten” means any mountain lion less than one (1) year of age.

(c) “Mortality” means any legal or illegal human caused mountain lion death, excluding mountain lions taken by the Department, known natural mortalities and accidental mountain lion deaths.

Section 3. Hunting Seasons Established. There shall be open seasons for the hunting of mountain lion as set forth in this regulation. This regulation shall remain in effect until modified or repealed by the Commission.

Section 4. Hunting Regulations.

(a) Mountain lions shall only be taken during open seasons, except as otherwise provided by State statute and Commission regulations.

(b) Open Hours for Taking of Mountain Lions. Mountain lions shall only be taken one-half (1/2) hour before sunrise to one-half (1/2) hour after sunset.

(c) Registering Kills. Hunters taking mountain lions shall retain the pelt and skull from each mountain lion taken for registration purposes. Even if the skull is damaged, it shall accompany the pelt. Visible external evidence of sex shall remain naturally attached to the pelt. Within three (3) days (seventy-two (72) hours) after taking a mountain lion, the licensee shall present the pelt and skull to a district game warden, district wildlife biologist, or Department personnel at a Department Regional Office during business hours for registration. The pelt and skull shall be presented in an unfrozen condition in order to allow collection of two (2) premolar teeth to be utilized to determine the age of the mountain lion and to allow examination of the pelt to determine the sex of the mountain lion. At the time of registration, the licensee shall furnish the Department the location of the site of kill to include section, township and range, or UTM coordinates.

(d) Any person who makes a false statement on the registration form regarding the date the mountain lion was taken or the hunt area in which it was taken shall be in violation of this regulation and, such violation shall be punishable as provided by Title 23, Wyoming statutes for violation of Commission regulations.

(e) After a mountain lion has been pursued, treed, cornered or held at bay, a properly licensed person shall immediately harvest or release the mountain lion. No person shall in any manner restrict or hinder the mountain lion's ability to escape for the purpose of allowing a person who was not present at the time the mountain lion was treed to arrive and take the mountain lion.

(f) Use of Dogs. Dogs may be used to take mountain lions during the open season.

(g) Bag and Possession Limits. The bag and possession limit for any person with a proper license shall be one (1) mountain lion during any one (1) calendar year (January 1-December 31). Hunters may take any mountain lion, except kittens and female mountain lions with kittens at side shall not be taken.

(h) Open Areas, Season Dates and Limitations.

| <b>Mountain Lion Management Unit</b> | <b>Hunt Area</b> | <b>Dates of Seasons</b> | <b>Annual Mortality Quota</b> | <b>Annual Female Mortality Quota</b> |
|--------------------------------------|------------------|-------------------------|-------------------------------|--------------------------------------|
| Northeast                            | 1                | Sept. 1-Mar. 31         | 16                            |                                      |
|                                      | 24               | Sept. 1-Mar. 31         | 4                             |                                      |
|                                      | 30               | Sept. 1-Mar. 31         | 8                             |                                      |
| Southeast                            | 5                | Sept. 1-Mar. 31         | 12                            |                                      |
|                                      | 6                | Sept. 1-Mar. 31         | 12                            |                                      |
|                                      | 7                | Sept. 1-Mar. 31         | 14                            |                                      |
|                                      | 8                | Sept. 1-Mar. 31         | 10                            |                                      |
|                                      | 9                | Sept. 1-Mar. 31         | 7                             |                                      |
|                                      | 10               | Sept. 1-Mar. 31         | 7                             |                                      |
|                                      | 16               | Sept. 1-Mar. 31         | 6                             |                                      |
|                                      | 25               | Sept. 1-Mar. 31         | 3                             |                                      |
|                                      | 27               | Sept. 1-Aug. 31         | 10                            |                                      |
|                                      | 31               | Sept. 1-Mar. 31         | 6                             |                                      |
| Southwest                            | 11               | Sept. 1-Mar. 31         | 2                             |                                      |
|                                      | 12               | Sept. 1-Mar. 31         | 6                             | 3                                    |
|                                      | 13               | Sept. 1-Mar. 31         | 3                             |                                      |
| North-Central                        | 15               | Sept. 1-Aug. 31         | 25                            |                                      |
|                                      | 21               | Sept. 1-Mar. 31         | 20                            |                                      |
|                                      | 22               | Sept. 1-Aug. 31         | 15                            |                                      |
|                                      | 23               | Sept. 1-Mar. 31         | 18                            |                                      |
| West                                 | 2                | Sept. 1-Mar. 31         | 7                             | 3                                    |
|                                      | 3                | Sept. 1-Mar. 31         | 12                            |                                      |
|                                      | 4                | Sept. 1-Mar. 31         | 8                             |                                      |
|                                      | 14               | Sept. 1-Mar. 31         | 15                            |                                      |
|                                      | 17               | Sept. 1-Mar. 31         | 9                             |                                      |
|                                      | 18               | Sept. 1-Mar. 31         | 12                            |                                      |
|                                      | 19               | Sept. 1-Mar. 31         | 20                            |                                      |
|                                      | 20               | Sept. 1-Mar. 31         | 4                             |                                      |
|                                      | 26               | Sept. 1-Mar. 31         | 15                            |                                      |
|                                      | 28               | Sept. 1-Mar. 31         | 3                             |                                      |
|                                      | 29               | Sept. 1-Mar. 31         | 9                             | 4                                    |

(i) Area Mortality Quota Limitation. The mountain lion season in a hunt area shall close when the mortality quota is reached. If the female mortality quota is not reached, the season shall close upon the date specified in subsection (h) of this section. In areas for which a female quota is listed, the hunt area shall close if the female mortality quota is reached prior to the annual mortality quota being reached. Mortality quotas shall be for fall through spring. It is the hunter's responsibility to confirm that the hunt area he/she intends to hunt is open. The status of hunt area closures is available by calling toll free **1-800-637-0809** twenty-four (24) hours a

day. Any mountain lion mortality documented by Department personnel after the close of the season shall be subtracted from the mortality quota for the next biological year.

Section 5. Archery Regulations. Mountain lions may be taken with archery equipment in all areas as set forth in Section 4 of this Chapter.

Section 6. Hunt Area Descriptions.

(a) Area and Number

Area 1. Black Hills. Beginning where the Wyoming-Montana-South Dakota state lines meet; southerly along the Wyoming-South Dakota state line to U.S. Highway 85; southwesterly along said highway to Wyoming Highway 585; northwesterly along said highway to Interstate Highway 90; westerly along said highway to U.S. Highway 14 at the town of Sundance; northwesterly along said highway to Wyoming Highway 24; northerly along said highway to Wyoming Highway 112 in the town of Hulett; northerly along said highway to the Wyoming-Montana state line; easterly along said line to the Wyoming-South Dakota state line.

Area 2. Teton. Beginning where the Continental Divide crosses the southern boundary of Yellowstone National Park; southerly along said divide to the Union Pass Road (U.S.F.S. Road 600); westerly and southerly along said road to the Darwin Ranch Road (U.S.F.S. Road 620); westerly along said road to the divide between the Green River and the Gros Ventre River; southwesterly along said divide to the divide between the Gros Ventre River and the Hoback River at Hodges Peak; westerly along said divide to the divide between Flat Creek and the Granite Creek; southwesterly along said divide to Cache Peak; northerly along the divide between Flat Creek and Cache Creek at Jackson Peak; westerly along the ridge between Cache Creek and Twin Creeks to the Bridger-Teton National Forest/National Elk Refuge Boundary; southwesterly along the National Elk Refuge boundary to where Flat Creek crosses U. S. Highway 26-89-191 at the north edge of the town of Jackson; southwesterly along said highway to Wyoming Highway 22; westerly along said highway to the Wyoming-Idaho state line; northerly along said line to the south boundary of Yellowstone National Park; easterly along said boundary to the Continental Divide.

Area 3. Bridger. Beginning where the Union Pass Road (U.S.F.S. Road 600) crosses the Continental Divide; southeasterly along said divide to U.S. Highway 28; southwesterly along said highway to U.S. Highway 191; northerly along said highway to the divide between the Green River and the Hoback River (Hoback Rim); northerly along said divide to the divide between the Green River and the Gros Ventre River at Hodges Peak; northeasterly along said divide to the Darwin Ranch Road (U.S.F.S. Road 620); easterly along said road to the Union Pass Road (U.S.F.S. Road 600); northerly and easterly along said road to the Continental Divide.

Area 4. Popo Agie. Beginning where Wyoming Highway 789 crosses the southern boundary of the Wind River Indian Reservation; westerly and southerly along said highway to Wyoming Highway 28; southwesterly along said highway to the Continental Divide; northwesterly along said divide to the south boundary of the Wind River Indian Reservation; easterly along said boundary to Wyoming Highway 789.



Area 5. Iron Mountain. Beginning where Interstate Highway 25 crosses the Wyoming-Colorado state line; westerly along said line to U.S. Highway 287; northerly along said highway to Wyoming Highway 34; northerly and easterly along said highway to Interstate Highway 25; southerly along said highway to the Wyoming-Colorado state line.

Area 6. Laramie Peak. Beginning where Interstate Highway 25 crosses the North Platte River at the city of Douglas; southerly along said highway to Wyoming Highway 34; westerly along said highway to U.S. Highway 287; northerly and westerly along said highway to Wyoming Highway 487; northerly and westerly along said highway to the divide between Spring Creek and Lone Tree Creek at Shirley Rim; northerly and easterly along said divide to the divide between Spring Creek and Bates Creek; northeasterly along said divide to the Bates Creek Road (Natrona County Road 402); easterly along said road to the Squaw Springs Trail; northerly along said road to U.S.F.S. Road 660; easterly along said road to Curry Creek; northwesterly down said creek to Deer Creek; northeasterly down said creek to the confluence of Deer Creek and the North Platte River; easterly down said river to Interstate Highway 25.

Area 7. South Snowy Range. Beginning at the city of Laramie and U.S. Highway 287; southerly along said highway to the Wyoming-Colorado state line; westerly along said line to Wyoming Highway 230 (west of the North Platte River); northerly along said highway to Wyoming Highway 130; easterly along said highway to the city of Laramie.

Area 8. Seminole. Beginning at the junction of Wyoming Highway 220 and Wyoming Highway 487; southerly along Wyoming Highway 487 to U.S. Highway 287; westerly along said highway to Interstate Highway 80; westerly along said highway to U.S. Highway 287 in the city of Rawlins; northerly along said highway to Wyoming Highway 220; northeasterly along said highway to Wyoming Highway 487.

Area 9. Sierra Madre. Beginning at the junction of Interstate Highway 80 and Wyoming Highway 130; southerly along Wyoming Highway 130 to Wyoming Highway 230; southeasterly along said highway to the Wyoming-Colorado state line; westerly along said line to the Continental Divide; northerly along said divide to the Sage Creek Road (Carbon County Road 401); northerly along said road to Wyoming Highway 71; northerly along said highway to Interstate Highway 80; easterly along said highway to Wyoming Highway 130.

Area 10. Haystacks. Beginning at the junction of Interstate Highway 80 and the Bitter Creek Road (Sweetwater County Road 19); easterly along Interstate Highway 80 to the junction of Wyoming Highway 71; southerly along said highway to the Sage Creek Road (Carbon County Road 401); southerly along said road to the Continental Divide at Middlewood Hill; southerly along said divide to the Wyoming-Colorado state line; westerly along said line to the Cow Creek-Powder Wash Road north of Powder Wash, Colorado; northwesterly along said road to the Bitter Creek Road; northerly along said road to Interstate Highway 80.

Area 11. Red Desert. Beginning at the junction of Wyoming Highway 73 and U.S. Highway 287; southerly along U.S. Highway 287 to Interstate Highway 80; westerly along said highway to the Green River; northerly up said river to Big Sandy River; northeasterly up said

river to U.S. Highway 191; southerly along said highway to Wyoming Highway 28; northeasterly along said highway to the Sweetwater River; northeasterly down said river to U.S. Highway 287; easterly along said highway to the Bison Basin Road; southerly along said road to the Alkali Creek Road (BLM 2317); easterly along said road to the Wamsutter-Crooks Gap Road; southerly along said road to the Bairoil Road (Sweetwater County Road 22); easterly along said road to Wyoming Highway 73; easterly along said highway to U.S. Highway 287.

Area 12. Flaming Gorge. Beginning where Interstate Highway 80 intersects the Bitter Creek Road (Sweetwater County Road 19); southerly along the Bitter Creek Road to the Cow Creek-Powder Wash Road north of Powder Wash, Colorado; southeasterly along said road to the Wyoming-Colorado state line; westerly along said line to the Wyoming-Utah state line; westerly along said line to Flaming Gorge Reservoir and the Green River; northerly up said river to Interstate Highway 80; easterly along said highway to the junction of the Bitter Creek Road.

Area 13. Wasatch. Beginning where Interstate Highway 80 crosses the Green River; southerly down said river to the Wyoming-Utah state line; westerly and northerly along said line to Interstate Highway 80; easterly along said highway to the Green River.

Area 14. Lincoln. Beginning where the Green River crosses Interstate Highway 80; westerly along said highway to the Wyoming-Utah state line; northerly along said line to the Wyoming-Idaho state line; northerly along said line to the divide between the Salt River and Bear River; easterly along said divide to the divide between the Salt River and the Smiths Fork River; northeasterly along said divide to Commissary Ridge; southeasterly along said ridge to the head of LaBarge Creek; southeasterly down said creek to the Green River; southeasterly down said river to Interstate Highway 80.

Area 15. Kaycee. Beginning at the junction of U.S. Highway 16 and Interstate Highway 25 at the town of Buffalo; southerly along Interstate Highway 25 to U.S. Highway 20-26 at the city of Casper; westerly along said highway to the town of Waltman and the Waltman-Arminto Road (Natrona County Road 104); northerly along said road to the Buffalo Creek Road (Natrona County Road 105); northeasterly along said road to the Big Horn Mountain Divide Road/Hazeltown Road (Natrona County Road 109-Washakie County Road 81-Johnson County Road 3); northerly along said road to the Gold Mine Road (U.S.F.S. Road 452); northerly along said road to the Canyon Creek Road (U.S.F.S. Road 25); northerly along said road to U.S. Highway 16; northeasterly along said highway to Interstate Highway 25.

Area 16. Gas Hills. Beginning at the city of Casper and Wyoming Highway 220; southwestward along said highway to U.S. Highway 287; southerly along said highway to Wyoming Highway 73 at Lamont; westerly along said highway to the Bairoil Road (Sweetwater County Road 22); westerly along said road to the Wamsutter Crooks Gap Road; northerly along said road to the Alkali Creek Road (BLM 2317); westerly along said road to the Bison Basin Road; northerly along said road to U.S. Highway 287; westerly along said highway to the Sweetwater River; southwestward up said river to Wyoming Highway 28; northerly along said highway to Wyoming Highway 789; northerly and easterly along said highway to the boundary of the Wind River Indian Reservation; easterly and northerly along said boundary to U.S. Highway 20-26; easterly along said highway to Wyoming Highway 220 in the city of Casper.

Area 17. Piney. Beginning where U.S. Highway 191 crosses the Green River; southeasterly along said highway to the Big Sandy River; southwesterly down said river to the Green River; northerly up said river to LaBarge Creek; northwesterly up said creek to the Greys River Road at Tri Basin Divide; northerly along said road to the divide between the Green River and the Greys River; easterly and northerly along said divide to the divide between the Green River and the Hoback River (Hoback Rim); easterly along said divide to U.S. Highway 191; southerly along said highway to the Green River.

Area 18. Wind River. All of the drainage of the Wind River, which lies west of the west boundary of the Wind River Indian Reservation.

Area 19. Northwest. Beginning where the Big Horn River crosses the Wyoming-Montana state line; southerly up said river to Dry Creek; southwesterly up said creek to the South Fork of Dry Creek; southwesterly up said creek, past the Halfway House historical marker on Wyoming Highway 120, to the divide between Meeteetse Creek and Sage Creek; westerly along said divide to the divide between the Greybull River and the South Fork of the Shoshone River; southwesterly along said divide to the divide between the South Fork of the Shoshone River and the Wind River; westerly along said divide to the Continental Divide; northwesterly along said divide to the south boundary of Yellowstone National Park; easterly then northerly along said boundary to the Wyoming-Montana state line; easterly along said line to the Big Horn River.

Area 20. Grass Creek. Beginning where Dry Creek flows into the Big Horn River; southerly up said river to the north boundary of the Wind River Indian Reservation; westerly along said boundary to the divide between the Wood River and Wind River; northwesterly along said divide to the divide between the Greybull River and the Wind River; northwesterly along said divide to the divide between the Greybull River and the South Fork of the Shoshone River; northeasterly along said divide to the divide between Meeteetse Creek and Sage Creek; easterly along said divide to the head of the South Fork of Dry Creek; northeasterly down said creek, past the Halfway House historical maker on Wyoming Highway 120, to Dry Creek; northeasterly down said creek to the Big Horn River; and all non-Indian fee title lands in that portion of Hot Springs County within the exterior boundaries of the Wind River Indian Reservation.

Area 21. Shell. Beginning where the Big Horn Mountain Divide crosses the Wyoming-Montana state line; southerly along said divide to U.S. Highway 16; westerly along said highway to the Big Horn River; northerly down said river to the Wyoming-Montana state line; easterly along said line to the Big Horn Mountain Divide.

Area 22. Ten Sleep. Beginning at the junction of U.S. Highway 16 and the Canyon Creek Road (U.S.F.S. Road 25); southerly along said road to the Gold Mine Road (U.S.F.S. Road 452); southerly along said road to the Big Horn Mountain Divide Road-Hazelton Road (Johnson County Road 3-Washakie County Road 81-Natrona County Road 109); southerly along said road to the Buffalo Creek Road (Natrona county Road 105); southwesterly along said road to the Waltman-Arminto Road (Natrona County Road 104); southerly along said road to the town of Waltman and U.S. Highway 20-26; westerly along said highway to the east boundary of

the Wind River Indian Reservation; northerly then westerly along said boundary to the Big Horn River; northerly down said river to U.S. Highway 16; easterly along said highway to the Canyon Creek Road (U.S.F.S. Road 25). Also included are all lands of the Wind River Indian Reservation within the Bureau of Reclamation Riverton and Boysen Unit boundaries and Boysen State Park, excluding Indian sole occupancy lands north of Cottonwood Creek.

Area 23. Sheridan. Beginning where Interstate Highway 90 crosses the Wyoming-Montana state line; southerly along said highway to Interstate Highway 25; southerly along said highway to U.S. Highway 16; southwesterly along said highway to the Big Horn Mountain Divide at Powder River Pass; northerly along said divide to the Wyoming-Montana state line; easterly along said line to Interstate Highway 90.

Area 24. Northeast. Beginning where the Rocky Point Road crosses the Wyoming-Montana state line; southerly along said road to the "D" Road; southerly along said road to Interstate Highway 90; easterly along said highway to U.S. Highway 16; southeasterly along said highway to the Wyoming-South Dakota state line; southerly along said line to the Wyoming-Nebraska state line; southerly along said line to U.S. Highway 20; westerly along said highway to Interstate Highway 25; northwesterly along said highway to the North Platte River at the town of Douglas; westerly up said river to the city of Casper and Interstate Highway 25; northerly along said highway to Interstate Highway 90; northerly along said highway to the Wyoming-Montana state line; easterly along said line to the Rocky Point Road.

Area 25. Hartville. Beginning where U.S. Highway 20 crosses the Wyoming-Nebraska state line; southerly along said line to the Wyoming-Colorado state line; westerly along said line to Interstate Highway 25; northerly along said highway to U.S. Highway 20; easterly along said highway to the Wyoming-Nebraska state line.

Area 26. Greys River. Beginning at the Wyoming-Idaho state line on the Snake River; easterly up said river to Bailey Creek; southeasterly up said creek to Dry Wash Draw; easterly up said draw to the divide between Bailey Creek and Willow Creek (Greyback Ridge); southerly along said divide to the divide between the Greys River and Willow Creek; southerly along said divide to the divide between the Greys River and the Hoback River; southerly along said divide to the divide between the Greys River and the Green River; southerly and westerly along said divide to the Greys River Road at the Tri Basin Divide; southerly along said road to La Barge Creek; northwesterly up said creek to Commissary Ridge; northwesterly along said ridge to the divide between the Salt River and the Smiths Fork River; southwesterly along said divide to the divide between the Salt river and the Bear River; westerly along said divide to the Wyoming-Idaho state line; northerly along said line to the Snake River.

Area 27. Casper Mountain. Beginning at the confluence of the North Platte River and Deer Creek at the town of Glenrock; southerly up said creek to the confluence of Curry Creek and Deer Creek; southeasterly up Curry Creek to U.S.F.S. Road 660; westerly along said road to the Squaw Spring Trail Road; southerly along said road to the Bates Creek Road (Natrona County Road 402); westerly along said road to the divide between Bates Creek and Spring Creek; westerly and southerly along said divide to the divide between Spring Creek and Lone Tree Creek; westerly and southerly along said divide to Wyoming Highway 487; northerly and

westerly along said highway to Wyoming Highway 220; northerly and easterly along said highway to the Casper city limits; northerly along said city limits to the North Platte River; easterly along said river to Deer Creek.

Area 28. Crowheart Butte. All non-Indian owned fee title land within the exterior boundaries of the Wind River Indian Reservation excluding Mountain Lion Hunt Area 22, those areas of the Spence and Moriarity Wildlife Management Area that lie east of the East Fork of the Wind River, and those lands within Hot Springs County.

Area 29. Hoback. Beginning where U.S. Highway 191 crosses Flat Creek at the north edge of the town of Jackson; due east to the National Elk Refuge boundary; easterly along said boundary to the Bridger-Teton National Forest boundary and the ridge between Twin Creeks and Cache Creek; easterly along said ridge to Jackson Peak; southerly along the divide between Flat Creek and Cache Creek to Cache Peak; easterly along the divide between Flat Creek and Granite Creek to Pyramid Peak; southerly along the divide between the Gros Ventre River and the Hoback River to Steamboat Peak; southeasterly along said divide to the divide between the Green River and the Hoback River at Hodges Peak; southeasterly along the divide between the Hoback River and Green River; southwesterly along said divide to the divide between the Greys River and Hoback River; northeasterly and westerly along said divide to the divide between the Greys River and Willow Creek; northerly along said divide to the divide between the Bailey Creek and Willow Creek (Greyback Ridge); northerly along said divide to Dry Wash Draw; westerly down said draw to Baily Creek; northwesterly down said creek to the Snake River; southerly and westerly down the Snake River to the Wyoming-Idaho state line; northerly along said line to Wyoming Highway 22; easterly along said highway to U.S. Highway 191; northeasterly along said highway to Flat Creek.

Area 30. Sundance. Beginning where the Wyoming-Montana state line crosses Wyoming Highway 112; southerly along said highway to the town of Hulett and Wyoming Highway 24; southerly along said highway to U.S. Highway 14; southeasterly along said highway to Interstate Highway 90 at the town of Sundance; easterly along said highway to Wyoming Highway 585; southeasterly along said highway to U.S. Highway 85; northeasterly along said highway to Wyoming-South Dakota state line; southerly along said line to U.S. Highway 16; northwesterly along said highway to Interstate Highway 90 at the town of Moorcroft; westerly along said highway to the "D" Road; northerly along said road to the Rocky Point Road; northerly along said road to the Wyoming-Montana state line; easterly along said line to Wyoming Highway 112.

Area 31. Elk Mountain. Beginning at the city of Laramie and Wyoming Highway 130; westerly then northerly along said highway to U.S. Highway 287; easterly and southerly along said highway to the city of Laramie.

Section 7. Violation of Commission Regulations. Failure to abide by the provisions of this regulation shall be punishable as provided by Wyoming statutes for violation of Commission regulations.

Section 8. Savings Clause. If any provision of this regulation is held to be illegal or unconstitutional, such a ruling shall not affect other provisions of this regulation which can be given effect without the illegal or unconstitutional provision; and, to this end, the provisions of the regulation are severable.

WYOMING GAME AND FISH COMMISSION

By:

Bill Williams, DVM, President

Dated: July 20, 2007

# WYOMING GAME AND FISH COMMISSION

## CHAPTER 42

### MOUNTAIN LION HUNTING SEASONS

#### EMERGENCY RULE

**(For the 120 days the emergency rules are in effect, the following rules shall apply. Emergency rules are no longer in effect 120 days after filing with the Secretary of State.)**

Section 1. Authority. This regulation is promulgated by authority of W.S. §23-1-302 and W.S. §23-2-101(d).

Section 2. Definitions. For the purpose of this regulation, definitions shall be as set forth in Title 23, Wyoming Statutes and the Commission also adopts the following definitions:

(a) “Biological year” means twelve (12) consecutive months from September 1 to August 31.

(b) “Kitten” means any mountain lion less than one (1) year of age.

(c) “Mortality” means any human caused mountain lion death documented by the Department.

Section 3. Hunting Seasons Established. There shall be open seasons for the hunting of mountain lion as set forth in this regulation. This regulation shall remain in effect until modified or repealed by the Commission.

Section 4. Hunting Regulations.

(a) Mountain lions shall only be taken during open seasons, except as otherwise provided by State statute and Commission regulations.

(b) Open Hours for Taking of Mountain Lions. Mountain lions shall only be taken one-half (1/2) hour before sunrise to one-half (1/2) hour after sunset.

(c) Registering Kills. Hunters taking mountain lions shall retain the pelt and skull from each mountain lion taken for registration purposes. Even if the skull is damaged, it shall accompany the pelt. Visible external evidence of sex shall remain naturally attached to the pelt. Within three (3) days (seventy-two (72) hours) after taking a mountain lion, the licensee shall present the pelt and skull to a district game warden, district wildlife biologist, or Department personnel at a Department Regional Office

during business hours for registration. The pelt and skull shall be presented in an unfrozen condition in order to allow collection of two (2) premolar teeth to be utilized to determine the age of the mountain lion and to allow examination of the pelt to determine the sex of the mountain lion. At the time of registration, the licensee shall furnish the Department the location of the site of kill to include section, township and range, or UTM coordinates.

(d) Any person who makes a false statement on the registration form regarding the date the mountain lion was taken or the hunt area in which it was taken shall be in violation of this regulation and, such violation shall be punishable as provided by Title 23, Wyoming statutes for violation of Commission regulations.

(e) After a mountain lion has been pursued, treed, cornered or held at bay, a properly licensed person shall immediately harvest or release the mountain lion. No person shall in any manner restrict or hinder the mountain lion's ability to escape for the purpose of allowing a person who was not present at the time the mountain lion was treed to arrive and take the mountain lion.

(f) Use of Dogs. Dogs may be used to take mountain lions during the open season.

(g) Bag and Possession Limits. The bag and possession limit for any person with a proper license shall be one (1) mountain lion during any one (1) calendar year (January 1-December 31). Hunters may take any mountain lion, except kittens and female mountain lions with kittens at side shall not be taken.



(h) Open Areas, Season Dates and Limitations.

| <b>Mountain Lion Management Unit</b> | <b>Hunt Area</b> | <b>Dates of Seasons</b> | <b>Annual Mortality Quota</b> | <b>Annual Female Mortality Quota</b> |
|--------------------------------------|------------------|-------------------------|-------------------------------|--------------------------------------|
| Northeast                            | 1                | Sept. 1-Mar. 31         | 16                            |                                      |
|                                      | 24               | Sept. 1-Mar. 31         | 4                             |                                      |
|                                      | 30               | Sept. 1-Mar. 31         | 8                             |                                      |
| Southeast                            | 5                | Sept. 1-Mar. 31         | 12                            |                                      |
|                                      | 6                | Sept. 1-Mar. 31         | 12                            |                                      |
|                                      | 7                | Sept. 1-Mar. 31         | 14                            |                                      |
|                                      | 8                | Sept. 1-Mar. 31         | 10                            |                                      |
|                                      | 9                | Sept. 1-Mar. 31         | 7                             |                                      |
|                                      | 10               | Sept. 1-Mar. 31         | 7                             |                                      |
|                                      | 16               | Sept. 1-Mar. 31         | 6                             |                                      |
|                                      | 25               | Sept. 1-Mar. 31         | 3                             |                                      |
|                                      | 27               | Sept. 1-Aug. 31         | 10                            |                                      |
|                                      | 31               | Sept. 1-Mar. 31         | 6                             |                                      |
| Southwest                            | 11               | Sept. 1-Mar. 31         | 2                             |                                      |
|                                      | 12               | Sept. 1-Mar. 31         | 6                             | 3                                    |
|                                      | 13               | Sept. 1-Mar. 31         | 3                             |                                      |
| North-Central                        | 15               | Sept. 1-Aug. 31         | 25                            |                                      |
|                                      | 21               | Sept. 1-Mar. 31         | 20                            |                                      |
|                                      | 22               | Sept. 1-Aug. 31         | 15                            |                                      |
|                                      | 23               | Sept. 1-Mar. 31         | 18                            |                                      |
| West                                 | 2                | Sept. 1-Mar. 31         | 7                             | 3                                    |
|                                      | 3                | Sept. 1-Mar. 31         | 12                            |                                      |
|                                      | 4                | Sept. 1-Mar. 31         | 8                             |                                      |
|                                      | 14               | Sept. 1-Mar. 31         | 15                            |                                      |
|                                      | 17               | Sept. 1-Mar. 31         | 9                             |                                      |
|                                      | 18               | Sept. 1-Mar. 31         | 12                            |                                      |
|                                      | 19               | Sept. 1-Mar. 31         | 20                            |                                      |
|                                      | 20               | Sept. 1-Mar. 31         | 4                             |                                      |
|                                      | 26               | Sept. 1-Mar. 31         | 15                            |                                      |
|                                      | 28               | Sept. 1-Mar. 31         | 3                             |                                      |
|                                      | 29               | Sept. 1-Mar. 31         | 9                             | 4                                    |

(i) Area Mortality Quota Limitation. The mountain lion season in a hunt area shall close when the mortality quota is reached. If the female mortality quota is not reached, the season shall close upon the date specified in subsection (h) of this section. In areas for which a female quota is listed, the hunt area shall close if the female mortality quota is reached prior to the annual mortality quota being reached. Mortality quotas shall be for fall through spring. It is the hunter's responsibility to confirm that the

hunt area he/she intends to hunt is open. The status of hunt area closures is available by calling toll free **1-800-637-0809** twenty-four (24) hours a day. Any mountain lion mortality documented by Department personnel after the close of the season shall be subtracted from the mortality quota for the next biological year.

Section 5. Archery Regulations. Mountain lions may be taken with archery equipment in all areas as set forth in Section 4 of this Chapter.

Section 6. Hunt Area Descriptions.

(a) Area and Number

Area 1. Black Hills. Beginning where the Wyoming-Montana-South Dakota state lines meet; southerly along the Wyoming-South Dakota state line to U.S. Highway 85; southwesterly along said highway to Wyoming Highway 585; northwesterly along said highway to Interstate Highway 90; westerly along said highway to U.S. Highway 14 at the town of Sundance; northwesterly along said highway to Wyoming Highway 24; northerly along said highway to Wyoming Highway 112 in the town of Hulett; northerly along said highway to the Wyoming-Montana state line; easterly along said line to the Wyoming-South Dakota state line.

Area 2. Teton. Beginning where the Continental Divide crosses the southern boundary of Yellowstone National Park; southerly along said divide to the Union Pass Road (U.S.F.S. Road 600); westerly and southerly along said road to the Darwin Ranch Road (U.S.F.S. Road 620); westerly along said road to the divide between the Green River and the Gros Ventre River; southwesterly along said divide to the divide between the Gros Ventre River and the Hoback River at Hodges Peak; westerly along said divide to the divide between Flat Creek and the Granite Creek; southwesterly along said divide to Cache Peak; northerly along the divide between Flat Creek and Cache Creek at Jackson Peak; westerly along the ridge between Cache Creek and Twin Creeks to the Bridger-Teton National Forest/National Elk Refuge Boundary; southwesterly along the National Elk Refuge boundary to where Flat Creek crosses U. S. Highway 26-89-191 at the north edge of the town of Jackson; southwesterly along said highway to Wyoming Highway 22; westerly along said highway to the Wyoming-Idaho state line; northerly along said line to the south boundary of Yellowstone National Park; easterly along said boundary to the Continental Divide.

Area 3. Bridger. Beginning where the Union Pass Road (U.S.F.S. Road 600) crosses the Continental Divide; southeasterly along said divide to U.S. Highway 28; southwesterly along said highway to U.S. Highway 191; northerly along said highway to the divide between the Green River and the Hoback River (Hoback Rim); northerly along said divide to the divide between the Green River and the Gros Ventre River at Hodges Peak; northeasterly along said divide to the Darwin Ranch Road (U.S.F.S. Road 620);

easterly along said road to the Union Pass Road (U.S.F.S. Road 600); northerly and easterly along said road to the Continental Divide.

Area 4. Popo Agie. Beginning where Wyoming Highway 789 crosses the southern boundary of the Wind River Indian Reservation; westerly and southerly along said highway to Wyoming Highway 28; southwesterly along said highway to the Continental Divide; northwesterly along said divide to the south boundary of the Wind River Indian Reservation; easterly along said boundary to Wyoming Highway 789.

Area 5. Iron Mountain. Beginning where Interstate Highway 25 crosses the Wyoming-Colorado state line; westerly along said line to U.S. Highway 287; northerly along said highway to Wyoming Highway 34; northerly and easterly along said highway to Interstate Highway 25; southerly along said highway to the Wyoming-Colorado state line.

Area 6. Laramie Peak. Beginning where Interstate Highway 25 crosses the North Platte River at the city of Douglas; southerly along said highway to Wyoming Highway 34; westerly along said highway to U.S. Highway 287; northerly and westerly along said highway to Wyoming Highway 487; northerly and westerly along said highway to the divide between Spring Creek and Lone Tree Creek at Shirley Rim; northerly and easterly along said divide to the divide between Spring Creek and Bates Creek; northeasterly along said divide to the Bates Creek Road (Natrona County Road 402); easterly along said road to the Squaw Springs Trail; northerly along said road to U.S.F.S. Road 660; easterly along said road to Curry Creek; northwesterly down said creek to Deer Creek; northeasterly down said creek to the confluence of Deer Creek and the North Platte River; easterly down said river to Interstate Highway 25.

Area 7. South Snowy Range. Beginning at the city of Laramie and U.S. Highway 287; southerly along said highway to the Wyoming-Colorado state line; westerly along said line to Wyoming Highway 230 (west of the North Platte River); northerly along said highway to Wyoming Highway 130; easterly along said highway to the city of Laramie.

Area 8. Seminole. Beginning at the junction of Wyoming Highway 220 and Wyoming Highway 487; southerly along Wyoming Highway 487 to U.S. Highway 287; westerly along said highway to Interstate Highway 80; westerly along said highway to U.S. Highway 287 in the city of Rawlins; northerly along said highway to Wyoming Highway 220; northeasterly along said highway to Wyoming Highway 487.

Area 9. Sierra Madre. Beginning at the junction of Interstate Highway 80 and Wyoming Highway 130; southerly along Wyoming Highway 130 to Wyoming Highway 230; southeasterly along said highway to the Wyoming-Colorado state line; westerly along said line to the Continental Divide; northerly along said divide to the Sage Creek Road (Carbon County Road 401); northerly along said road to Wyoming Highway 71;

northerly along said highway to Interstate Highway 80; easterly along said highway to Wyoming Highway 130.

Area 10. Haystacks. Beginning at the junction of Interstate Highway 80 and the Bitter Creek Road (Sweetwater County Road 19); easterly along Interstate Highway 80 to the junction of Wyoming Highway 71; southerly along said highway to the Sage Creek Road (Carbon County Road 401); southerly along said road to the Continental Divide at Middlewood Hill; southerly along said divide to the Wyoming-Colorado state line; westerly along said line to the Cow Creek-Powder Wash Road north of Powder Wash, Colorado; northwesterly along said road to the Bitter Creek Road; northerly along said road to Interstate Highway 80.

Area 11. Red Desert. Beginning at the junction of Wyoming Highway 73 and U.S. Highway 287; southerly along U.S. Highway 287 to Interstate Highway 80; westerly along said highway to the Green River; northerly up said river to Big Sandy River; northeasterly up said river to U.S. Highway 191; southerly along said highway to Wyoming Highway 28; northeasterly along said highway to the Sweetwater River; northeasterly down said river to U.S. Highway 287; easterly along said highway to the Bison Basin Road; southerly along said road to the Alkali Creek Road (BLM 2317); easterly along said road to the Wamsutter-Crooks Gap Road; southerly along said road to the Bairoil Road (Sweetwater County Road 22); easterly along said road to Wyoming Highway 73; easterly along said highway to U.S. Highway 287.

Area 12. Flaming Gorge. Beginning where Interstate Highway 80 intersects the Bitter Creek Road (Sweetwater County Road 19); southerly along the Bitter Creek Road to the Cow Creek-Powder Wash Road north of Powder Wash, Colorado; southeasterly along said road to the Wyoming-Colorado state line; westerly along said line to the Wyoming-Utah state line; westerly along said line to Flaming Gorge Reservoir and the Green River; northerly up said river to Interstate Highway 80; easterly along said highway to the junction of the Bitter Creek Road.

Area 13. Wasatch. Beginning where Interstate Highway 80 crosses the Green River; southerly down said river to the Wyoming-Utah state line; westerly and northerly along said line to Interstate Highway 80; easterly along said highway to the Green River.

Area 14. Lincoln. Beginning where the Green River crosses Interstate Highway 80; westerly along said highway to the Wyoming-Utah state line; northerly along said line to the Wyoming-Idaho state line; northerly along said line to the divide between the Salt River and Bear River; easterly along said divide to the divide between the Salt River and the Smiths Fork River; northeasterly along said divide to Commissary Ridge; southeasterly along said ridge to the head of LaBarge Creek; southeasterly down said creek to the Green River; southeasterly down said river to Interstate Highway 80.

Area 15. Kaycee. Beginning at the junction of U.S. Highway 16 and Interstate Highway 25 at the town of Buffalo; southerly along Interstate Highway 25 to U.S.

Highway 20-26 at the city of Casper; westerly along said highway to the town of Waltman and the Waltman-Arminto Road (Natrona County Road 104); northerly along said road to the Buffalo Creek Road (Natrona County Road 105); northeasterly along said road to the Big Horn Mountain Divide Road/Hazelton Road (Natrona County Road 109-Washakie County Road 81-Johnson County Road 3); northerly along said road to the Gold Mine Road (U.S.F.S. Road 452); northerly along said road to the Canyon Creek Road (U.S.F.S. Road 25); northerly along said road to U.S. Highway 16; northeasterly along said highway to Interstate Highway 25.

Area 16. Gas Hills. Beginning at the city of Casper and Wyoming Highway 220; southwesterly along said highway to U.S. Highway 287; southerly along said highway to Wyoming Highway 73 at Lamont; westerly along said highway to the Bairoil Road (Sweetwater County Road 22); westerly along said road to the Wamsutter Crooks Gap Road; northerly along said road to the Alkali Creek Road (BLM 2317); westerly along said road to the Bison Basin Road; northerly along said road to U.S. Highway 287; westerly along said highway to the Sweetwater River; southwesterly up said river to Wyoming Highway 28; northerly along said highway to Wyoming Highway 789; northerly and easterly along said highway to the boundary of the Wind River Indian Reservation; easterly and northerly along said boundary to U.S. Highway 20-26; easterly along said highway to Wyoming Highway 220 in the city of Casper.

Area 17. Piney. Beginning where U.S. Highway 191 crosses the Green River; southeasterly along said highway to the Big Sandy River; southwesterly down said river to the Green River; northerly up said river to LaBarge Creek; northwesterly up said creek to the Greys River Road at Tri Basin Divide; northerly along said road to the divide between the Green River and the Greys River; easterly and northerly along said divide to the divide between the Green River and the Hoback River (Hoback Rim); easterly along said divide to U.S. Highway 191; southerly along said highway to the Green River.

Area 18. Wind River. All of the drainage of the Wind River, which lies west of the west boundary of the Wind River Indian Reservation.

Area 19. Northwest. Beginning where the Big Horn River crosses the Wyoming-Montana state line; southerly up said river to Dry Creek; southwesterly up said creek to the South Fork of Dry Creek; southwesterly up said creek, past the Halfway House historical marker on Wyoming Highway 120, to the divide between Meeteetse Creek and Sage Creek; westerly along said divide to the divide between the Greybull River and the South Fork of the Shoshone River; southwesterly along said divide to the divide between the South Fork of the Shoshone River and the Wind River; westerly along said divide to the Continental Divide; northwesterly along said divide to the south boundary of Yellowstone National Park; easterly then northerly along said boundary to the Wyoming-Montana state line; easterly along said line to the Big Horn River.

Area 20. Grass Creek. Beginning where Dry Creek flows into the Big Horn River; southerly up said river to the north boundary of the Wind River Indian

Reservation; westerly along said boundary to the divide between the Wood River and Wind River; northwesterly along said divide to the divide between the Greybull River and the Wind River; northwesterly along said divide to the divide between the Greybull River and the South Fork of the Shoshone River; northeasterly along said divide to the divide between Meeteetse Creek and Sage Creek; easterly along said divide to the head of the South Fork of Dry Creek; northeasterly down said creek, past the Halfway House historical marker on Wyoming Highway 120, to Dry Creek; northeasterly down said creek to the Big Horn River; and all non-Indian fee title lands in that portion of Hot Springs County within the exterior boundaries of the Wind River Indian Reservation.

Area 21. Shell. Beginning where the Big Horn Mountain Divide crosses the Wyoming-Montana state line; southerly along said divide to U.S. Highway 16; westerly along said highway to the Big Horn River; northerly down said river to the Wyoming-Montana state line; easterly along said line to the Big Horn Mountain Divide.

Area 22. Ten Sleep. Beginning at the junction of U.S. Highway 16 and the Canyon Creek Road (U.S.F.S. Road 25); southerly along said road to the Gold Mine Road (U.S.F.S. Road 452); southerly along said road to the Big Horn Mountain Divide Road-Hazelton Road (Johnson County Road 3-Washakie County Road 81-Natrona County Road 109); southerly along said road to the Buffalo Creek Road (Natrona county Road 105); southwesterly along said road to the Waltman-Arminto Road (Natrona County Road 104); southerly along said road to the town of Waltman and U.S. Highway 20-26; westerly along said highway to the east boundary of the Wind River Indian Reservation; northerly then westerly along said boundary to the Big Horn River; northerly down said river to U.S. Highway 16; easterly along said highway to the Canyon Creek Road (U.S.F.S. Road 25). Also included are all lands of the Wind River Indian Reservation within the Bureau of Reclamation Riverton and Boysen Unit boundaries and Boysen State Park, excluding Indian sole occupancy lands north of Cottonwood Creek.

Area 23. Sheridan. Beginning where Interstate Highway 90 crosses the Wyoming-Montana state line; southerly along said highway to Interstate Highway 25; southerly along said highway to U.S. Highway 16; southwesterly along said highway to the Big Horn Mountain Divide at Powder River Pass; northerly along said divide to the Wyoming-Montana state line; easterly along said line to Interstate Highway 90.

Area 24. Northeast. Beginning where the Rocky Point Road crosses the Wyoming-Montana state line; southerly along said road to the "D" Road; southerly along said road to Interstate Highway 90; easterly along said highway to U.S. Highway 16; southeasterly along said highway to the Wyoming-South Dakota state line; southerly along said line to the Wyoming-Nebraska state line; southerly along said line to U.S. Highway 20; westerly along said highway to Interstate Highway 25; northwesterly along said highway to the North Platte River at the town of Douglas; westerly up said river to the city of Casper and Interstate Highway 25; northerly along said highway to Interstate Highway 90; northerly along said highway to the Wyoming-Montana state line; easterly along said line to the Rocky Point Road.

Area 25. Hartville. Beginning where U.S. Highway 20 crosses the Wyoming-Nebraska state line; southerly along said line to the Wyoming-Colorado state line; westerly along said line to Interstate Highway 25; northerly along said highway to U.S. Highway 20; easterly along said highway to the Wyoming-Nebraska state line.

Area 26. Greys River. Beginning at the Wyoming-Idaho state line on the Snake River; easterly up said river to Bailey Creek; southeasterly up said creek to Dry Wash Draw; easterly up said draw to the divide between Bailey Creek and Willow Creek (Greyback Ridge); southerly along said divide to the divide between the Greys River and Willow Creek; southerly along said divide to the divide between the Greys River and the Hoback River; southerly along said divide to the divide between the Greys River and the Green River; southerly and westerly along said divide to the Greys River Road at the Tri Basin Divide; southerly along said road to La Barge Creek; northwesterly up said creek to Commissary Ridge; northwesterly along said ridge to the divide between the Salt River and the Smiths Fork River; southwestly along said divide to the divide between the Salt river and the Bear River; westerly along said divide to the Wyoming-Idaho state line; northerly along said line to the Snake River.

Area 27. Casper Mountain. Beginning at the confluence of the North Platte River and Deer Creek at the town of Glenrock; southerly up said creek to the confluence of Curry Creek and Deer Creek; southeasterly up Curry Creek to U.S.F.S. Road 660; westerly along said road to the Squaw Spring Trail Road; southerly along said road to the Bates Creek Road (Natrona County Road 402); westerly along said road to the divide between Bates Creek and Spring Creek; westerly and southerly along said divide to the divide between Spring Creek and Lone Tree Creek; westerly and southerly along said divide to Wyoming Highway 487; northerly and westerly along said highway to Wyoming Highway 220; northerly and easterly along said highway to the Casper city limits; northerly along said city limits to the North Platte River; easterly along said river to Deer Creek.

Area 28. Crowheart Butte. All non-Indian owned fee title land within the exterior boundaries of the Wind River Indian Reservation excluding Mountain Lion Hunt Area 22, those areas of the Spence and Moriarity Wildlife Management Area that lie east of the East Fork of the Wind River, and those lands within Hot Springs County.

Area 29. Hoback. Beginning where U.S. Highway 191 crosses Flat Creek at the north edge of the town of Jackson; due east to the National Elk Refuge boundary; easterly along said boundary to the Bridger-Teton National Forest boundary and the ridge between Twin Creeks and Cache Creek; easterly along said ridge to Jackson Peak; southerly along the divide between Flat Creek and Cache Creek to Cache Peak; easterly along the divide between Flat Creek and Granite Creek to Pyramid Peak; southerly along the divide between the Gros Ventre River and the Hoback River to Steamboat Peak; southeasterly along said divide to the divide between the Green River and the Hoback River at Hodges Peak; southeasterly along the divide between the Hoback River and

Green River; southwesterly along said divide to the divide between the Greys River and Hoback River; northeasterly and westerly along said divide to the divide between the Greys River and Willow Creek; northerly along said divide to the divide between the Bailey Creek and Willow Creek (Greyback Ridge); northerly along said divide to Dry Wash Draw; westerly down said draw to Baily Creek; northwesterly down said creek to the Snake River; southerly and westerly down the Snake River to the Wyoming-Idaho state line; northerly along said line to Wyoming Highway 22; easterly along said highway to U.S. Highway 191; northeasterly along said highway to Flat Creek.

Area 30. Sundance. Beginning where the Wyoming-Montana state line crosses Wyoming Highway 112; southerly along said highway to the town of Hulett and Wyoming Highway 24; southerly along said highway to U.S. Highway 14; southeasterly along said highway to Interstate Highway 90 at the town of Sundance; easterly along said highway to Wyoming Highway 585; southeasterly along said highway to U.S. Highway 85; northeasterly along said highway to Wyoming-South Dakota state line; southerly along said line to U.S. Highway 16; northwesterly along said highway to Interstate Highway 90 at the town of Moorcroft; westerly along said highway to the "D" Road; northerly along said road to the Rocky Point Road; northerly along said road to the Wyoming-Montana state line; easterly along said line to Wyoming Highway 112.

Area 31. Elk Mountain. Beginning at the city of Laramie and Wyoming Highway 130; westerly then northerly along said highway to U.S. Highway 287; easterly and southerly along said highway to the city of Laramie.

Section 7. Violation of Commission Regulations. Failure to abide by the provisions of this regulation shall be punishable as provided by Wyoming statutes for violation of Commission regulations.

Section 8. Savings Clause. If any provision of this regulation is held to be illegal or unconstitutional, such a ruling shall not affect other provisions of this regulation which can be given effect without the illegal or unconstitutional provision; and, to this end, the provisions of the regulation are severable.

## WYOMING GAME AND FISH COMMISSION

By:

Bill Williams, DVM, President

Dated: August 14, 2007



# 2007 MOUNTAIN LION HUNT AREAS

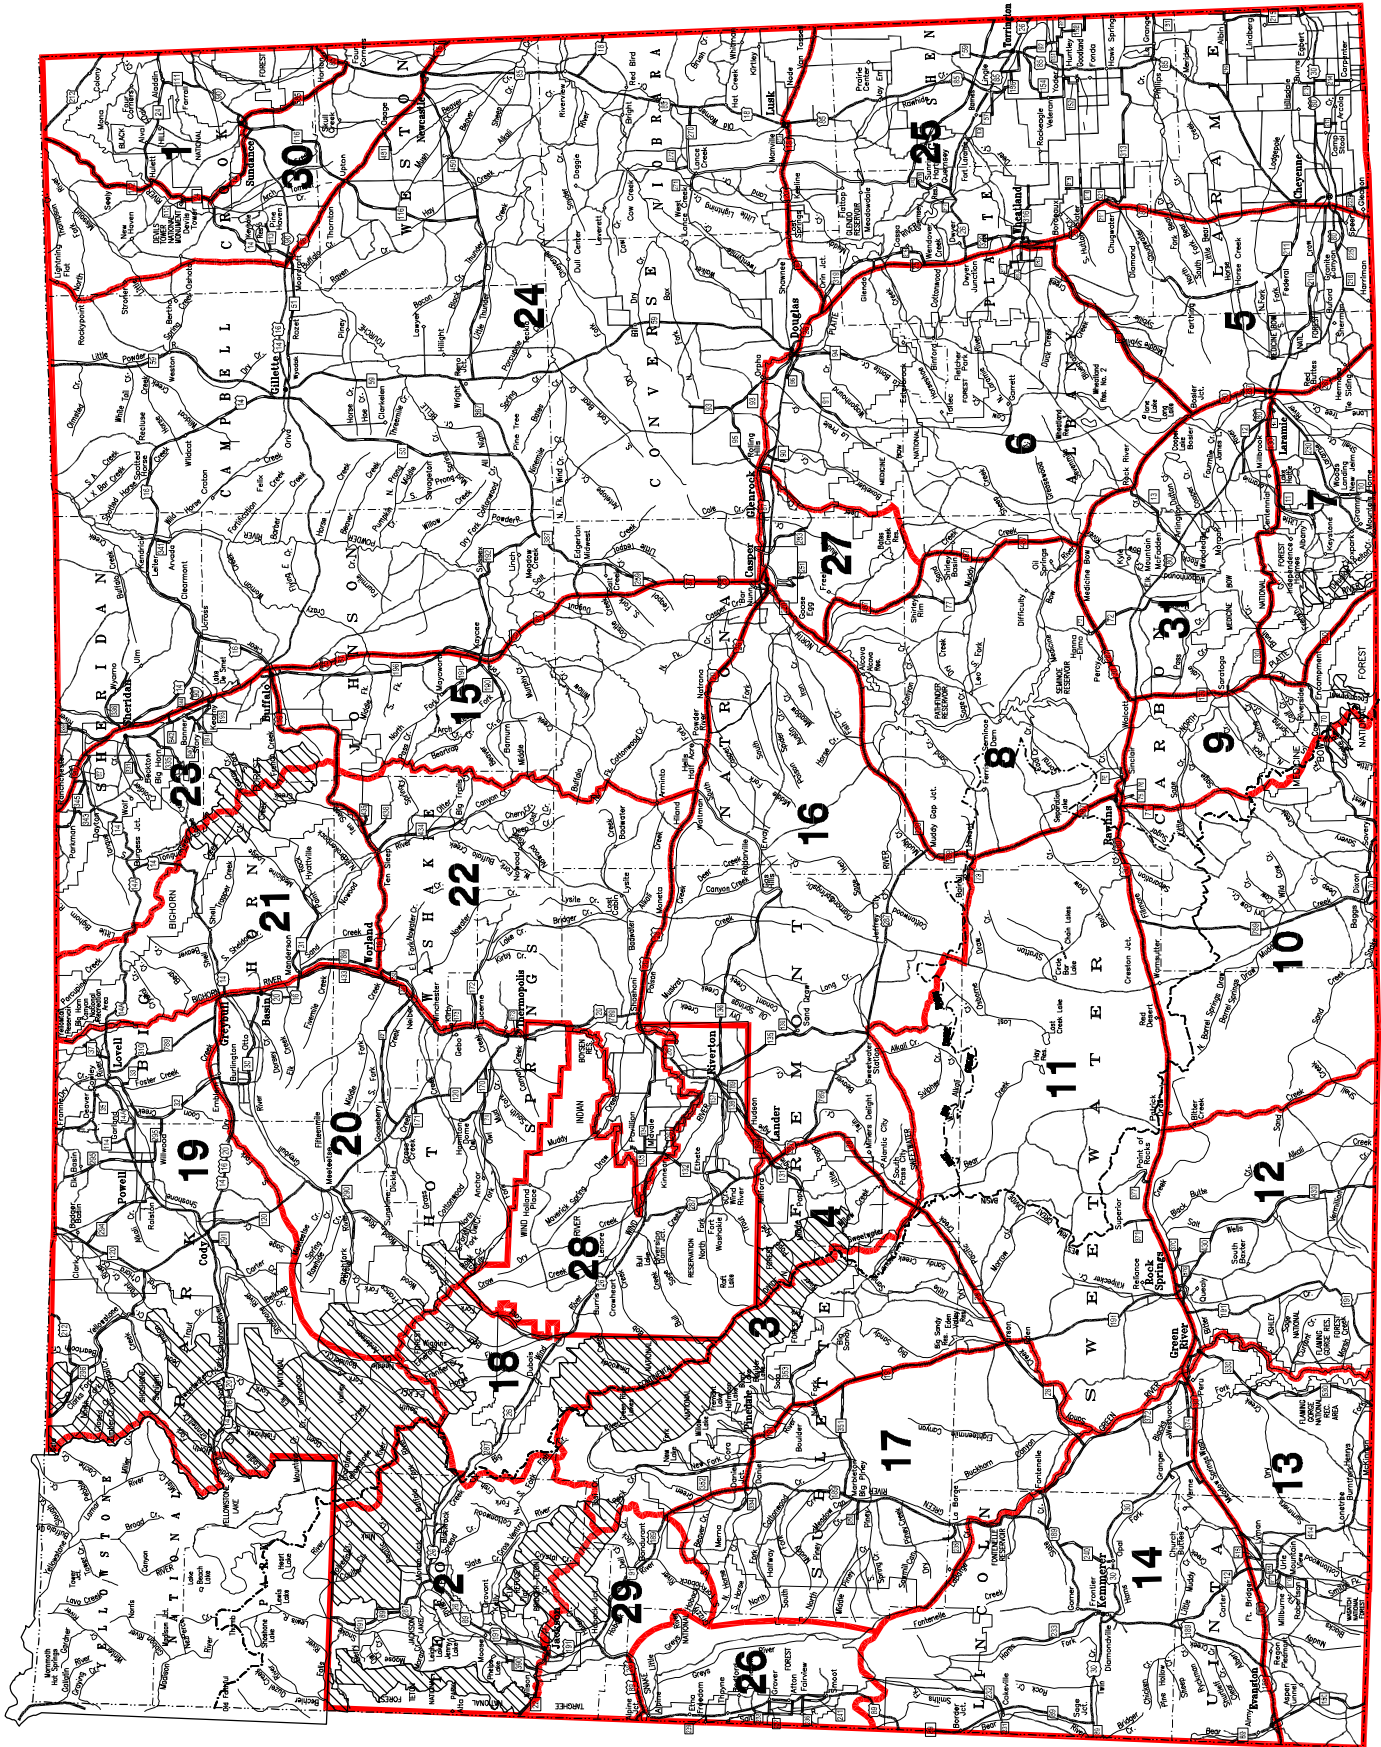

THIS MAP IS FOR GENERAL REFERENCE ONLY. Please use the written boundary descriptions in this regulation for detailed boundary information.

Note:  Wilderness area, nonresidents must have guides.



**ANTELOPE**  
**ARCHERY HUNTING - Harvest**  
 BY HUNTERS HOLDING AN ARCHERY TAG  
**2007**

|             | NUMBER<br>ACTIVE<br>ARCHERY<br>HUNTERS | HARVEST |     |      |       | HUNTER<br>SUCCESS | DAYS/<br>HARVEST |
|-------------|----------------------------------------|---------|-----|------|-------|-------------------|------------------|
|             |                                        | BUCK    | DOE | FAWN | TOTAL |                   |                  |
| STATE TOTAL | 3,899                                  | 1,511   | 771 | 65   | 2,347 | 60.2%             | 8.3              |
| RESIDENT    | 2,456                                  | 766     | 357 | 18   | 1,141 | 46.5%             | 11.9             |
| NONRESIDENT | 1,443                                  | 745     | 414 | 47   | 1,206 | 83.6%             | 5.0              |

**ANTELOPE**  
**ARCHERY HUNTING - Total Days**  
 BY HUNTERS HOLDING AN ARCHERY TAG  
**2007**

|             | TOTAL   |        | ARCHERY ONLY SEASON |        | GUN SEASON |       |
|-------------|---------|--------|---------------------|--------|------------|-------|
|             | HUNTERS | DAYS   | HUNTERS             | DAYS   | HUNTERS    | DAYS  |
| STATE TOTAL | 3,899   | 19,556 | 3,831               | 17,240 | 765        | 2,316 |
| RESIDENT    | 2,456   | 13,522 | 2,415               | 11,516 | 597        | 2,006 |
| NONRESIDENT | 1,443   | 6,034  | 1,416               | 5,724  | 168        | 310   |

**ANTELOPE**  
**ARCHERY HUNTING - EQUIPMENT USED\***  
**2007**

|                       |                     |                  |                   |
|-----------------------|---------------------|------------------|-------------------|
| COMPOUND BOW<br>84.4% | RECURVE BOW<br>4.0% | LONG BOW<br>2.6% | CROSSBOW<br>10.2% |
|-----------------------|---------------------|------------------|-------------------|

\*may total more than 100% as hunters could report using multiple types of equipment

BEAR  
ARCHERY HUNTING - Harvest  
BY HUNTERS HOLDING AN ARCHERY TAG  
2007

|             | NUMBER<br>ACTIVE<br>ARCHERY<br>HUNTERS | HARVEST |      |       | HUNTER<br>SUCCESS | DAYS/<br>HARVEST |
|-------------|----------------------------------------|---------|------|-------|-------------------|------------------|
|             |                                        | SPRING  | FALL | TOTAL |                   |                  |
| STATE TOTAL | 619                                    | 14      | 24   | 38    | 6.1%              | 135.3            |
| RESIDENT    | 568                                    | 14      | 15   | 29    | 5.1%              | 166.0            |
| NONRESIDENT | 51                                     | 0       | 9    | 9     | 17.6%             | 36.4             |

BEAR  
ARCHERY HUNTING - Total Days  
BY HUNTERS HOLDING AN ARCHERY TAG  
2007

|             | TOTAL   |       | ARCHERY ONLY SEASON |       | GUN SEASON |       |
|-------------|---------|-------|---------------------|-------|------------|-------|
|             | HUNTERS | DAYS  | HUNTERS             | DAYS  | HUNTERS    | DAYS  |
| STATE TOTAL | 619     | 5,141 | 526                 | 3,361 | 286        | 1,780 |
| RESIDENT    | 568     | 4,813 | 490                 | 3,159 | 268        | 1,654 |
| NONRESIDENT | 51      | 328   | 36                  | 202   | 18         | 126   |

BEAR  
ARCHERY HUNTING - EQUIPMENT USED\*  
2007

|                       |                     |                  |                   |
|-----------------------|---------------------|------------------|-------------------|
| COMPOUND BOW<br>78.4% | RECURVE BOW<br>5.0% | LONG BOW<br>6.9% | CROSSBOW<br>10.3% |
|-----------------------|---------------------|------------------|-------------------|

\*may total more than 100% as hunters could report using multiple types of equipment

**DEER**  
**ARCHERY HUNTING - Harvest**  
 BY HUNTERS HOLDING AN ARCHERY TAG  
**2007**

|             | NUMBER<br>ACTIVE<br>ARCHERY<br>HUNTERS | HARVEST |       |      |       | HUNTER<br>SUCCESS | DAYS/<br>HARVEST |
|-------------|----------------------------------------|---------|-------|------|-------|-------------------|------------------|
|             |                                        | BUCK    | DOE   | FAWN | TOTAL |                   |                  |
| STATE TOTAL | 8,237                                  | 1,515   | 1,153 | 111  | 2,779 | 33.7%             | 26.8             |
| RESIDENT    | 6,493                                  | 902     | 752   | 62   | 1,716 | 26.4%             | 36.0             |
| Mule Deer   | 5,993                                  | 666     | 384   | 23   | 1,073 | 17.9%             | 41.1             |
| White Tail  | 2,507                                  | 236     | 368   | 39   | 643   | 25.6%             | 27.6             |
| NONRESIDENT | 1,744                                  | 613     | 401   | 49   | 1,063 | 61.0%             | 11.9             |
| Mule Deer   | 1,527                                  | 372     | 229   | 29   | 630   | 41.3%             | 13.7             |
| White Tail  | 805                                    | 241     | 172   | 20   | 433   | 53.8%             | 9.3              |

**DEER**  
**ARCHERY HUNTING - Total Days**  
 BY HUNTERS HOLDING AN ARCHERY TAG  
**2007**

|             | TOTAL   |        | ARCHERY ONLY SEASON |        | GUN SEASON |        |
|-------------|---------|--------|---------------------|--------|------------|--------|
|             | HUNTERS | DAYS   | HUNTERS             | DAYS   | HUNTERS    | DAYS   |
| STATE TOTAL | 8,237   | 74,471 | 7,972               | 60,973 | 1,935      | 13,498 |
| RESIDENT    | 6,493   | 61,855 | 6,261               | 49,382 | 1,743      | 12,473 |
| Mule Deer   | 5,993   | 44,118 | 5,873               | 38,058 | 1,503      | 6,060  |
| White Tail  | 2,507   | 17,737 | 2,259               | 11,324 | 1,108      | 6,413  |
| NONRESIDENT | 1,744   | 12,616 | 1,711               | 11,591 | 192        | 1,025  |
| Mule Deer   | 1,527   | 8,601  | 1,507               | 8,092  | 147        | 509    |
| White Tail  | 805     | 4,015  | 784                 | 3,499  | 139        | 516    |

**DEER**  
**ARCHERY HUNTING - EQUIPMENT USED\***  
**2007**

|            | COMPOUND BOW | RECURVE BOW | LONG BOW | CROSSBOW |
|------------|--------------|-------------|----------|----------|
| Mule Deer  | 79.3%        | 4.2%        | 2.4%     | 14.8%    |
| White Tail | 81.3%        | 5.5%        | 3.2%     | 11.1%    |

\*may total more than 100% as hunters could report using multiple types of equipment

**ELK**  
**ARCHERY HUNTING - Harvest**  
 BY HUNTERS HOLDING AN ARCHERY TAG  
**2007**

|             | NUMBER<br>ACTIVE<br>ARCHERY<br>HUNTERS | HARVEST |       |     |      |       | HUNTER<br>SUCCESS | DAYS/<br>HARVEST |
|-------------|----------------------------------------|---------|-------|-----|------|-------|-------------------|------------------|
|             |                                        | BULL    | SPIKE | COW | CALF | TOTAL |                   |                  |
| STATE TOTAL | 9,756                                  | 1,195   | 171   | 155 | 36   | 1,557 | 16.0%             | 52.7             |
| RESIDENT    | 8,149                                  | 842     | 155   | 135 | 28   | 1,160 | 14.2%             | 60.2             |
| NONRESIDENT | 1,607                                  | 353     | 16    | 20  | 8    | 397   | 24.7%             | 30.9             |

**ELK**  
**ARCHERY HUNTING - Total Days**  
 BY HUNTERS HOLDING AN ARCHERY TAG  
**2007**

|             | TOTAL   |        | ARCHERY ONLY SEASON |        | GUN SEASON |       |
|-------------|---------|--------|---------------------|--------|------------|-------|
|             | HUNTERS | DAYS   | HUNTERS             | DAYS   | HUNTERS    | DAYS  |
| STATE TOTAL | 9,756   | 82,058 | 9,709               | 74,290 | 1,572      | 7,768 |
| RESIDENT    | 8,149   | 69,808 | 8,102               | 62,560 | 1,441      | 7,248 |
| NONRESIDENT | 1,607   | 12,250 | 1,607               | 11,730 | 131        | 520   |

**ELK**  
**ARCHERY HUNTING - EQUIPMENT USED\***  
**2007**

|                       |                     |                  |                   |
|-----------------------|---------------------|------------------|-------------------|
| COMPOUND BOW<br>77.3% | RECURVE BOW<br>4.0% | LONG BOW<br>2.4% | CROSSBOW<br>16.5% |
|-----------------------|---------------------|------------------|-------------------|

\*may total more than 100% as hunters could report using multiple types of equipment
