# Supplementary material for: The Elephant in the room: What can we learn from California regarding the use of sport hunting of pumas (Puma concolor) as a management tool?
Source: PLOS journal article supplement (doi:10.1371/journal.pone.0224638), 2020-02-13
Supplement: S3 (10.1371/journal.pone.0224638.s003) [file journal.pone.0224638.s003]

**Legend:**

Deer Species: (md = mule deer, wt = white-tailed deer, all\_deer = both species of deer combined)

Residency: Montana resident or non-resident(SUM= both residents and non-residents).

Hunters: Estimate of how many people of this residency hunted in this area.

Days: Estimate of the number of days spent hunting in a particular area by hunters in a particular area.

Days per Hunter: Estimate of the number of days spent hunting per hunter in a particular area for a particular residency.

Total Harvest: Estimate of the number of animals harvested by a particular residency.

## Deer Harvest Estimates - 2004 - 2018

| License Year | Hunting District | Deer Species | Residency | Hunters | Days    | Days per Hunter | Total Harvest | Bucks | Does  | Fawns | Bow  | Rifle  | Less than 4 Points | 4 or More Points |
|--------------|------------------|--------------|-----------|---------|---------|-----------------|---------------|-------|-------|-------|------|--------|--------------------|------------------|
| 2004         | State            | all_deer     | N         | 25780   | 146599  | 6               | 20375         | 14151 | 5543  | 579   | 611  | 19765  | 3397               | 10599            |
| 2004         | State            | all_deer     | R         | 127467  | 872052  | 7               | 98891         | 60432 | 37174 | 1214  | 3787 | 95104  | 22141              | 36369            |
| 2004         | State            | all_deer     | SUM       | 153247  | 1018651 | 7               | 119266        | 74583 | 42716 | 1793  | 4397 | 114869 | 25538              | 46968            |
| 2004         | State            | md           | N         | 25780   | 146599  | 6               | 14409         | 10673 | 3389  | 278   | 322  | 14087  | 3038               | 7553             |
| 2004         | State            | md           | R         | 127467  | 872052  | 7               | 50445         | 33488 | 16571 | 367   | 814  | 49631  | 14086              | 18479            |
| 2004         | State            | md           | SUM       | 153247  | 1018651 | 7               | 64854         | 44160 | 19960 | 645   | 1136 | 63718  | 17123              | 26032            |
| 2004         | State            | wt           | N         | 25780   | 146599  | 6               | 5569          | 3302  | 1962  | 288   | 271  | 5298   | 313                | 2919             |
| 2004         | State            | wt           | R         | 127467  | 872052  | 7               | 48258         | 26858 | 20523 | 844   | 2960 | 45298  | 8026               | 17839            |
| 2004         | State            | wt           | SUM       | 153247  | 1018651 | 7               | 53827         | 30160 | 22485 | 1132  | 3231 | 50595  | 8339               | 20758            |
| 2005         | State            | all_deer     | N         | 25915   | 159116  | 6               | 18475         | 13208 | 5069  | 198   | 692  | 17710  | 2686               | 10389            |
| 2005         | State            | all_deer     | R         | 124582  | 860345  | 7               | 96762         | 59292 | 36298 | 1132  | 4915 | 91074  | 20483              | 37406            |
| 2005         | State            | all_deer     | SUM       | 150497  | 1019461 | 7               | 115238        | 72501 | 41367 | 1330  | 5607 | 108783 | 23168              | 47795            |
| 2005         | State            | md           | N         | 25915   | 159116  | 6               | 12604         | 9836  | 2702  | 67    | 315  | 12241  | 2339               | 7415             |
| 2005         | State            | md           | R         | 124582  | 860345  | 7               | 45508         | 31661 | 13529 | 313   | 925  | 44216  | 12358              | 18734            |
| 2005         | State            | md           | SUM       | 150497  | 1019461 | 7               | 58112         | 41496 | 16231 | 380   | 1239 | 56457  | 14697              | 26149            |
| 2005         | State            | wt           | N         | 25915   | 159116  | 6               | 5847          | 3358  | 2360  | 129   | 378  | 5446   | 346                | 2960             |
| 2005         | State            | wt           | R         | 124582  | 860345  | 7               | 51076         | 27574 | 22691 | 798   | 3975 | 46734  | 8095               | 18651            |
| 2005         | State            | wt           | SUM       | 150497  | 1019461 | 7               | 56922         | 30931 | 25050 | 927   | 4353 | 52179  | 8441               | 21611            |
| 2006         | State            | all_deer     | N         | 26756   | 162497  | 6               | 20176         | 12949 | 6962  | 187   | 1093 | 18831  | 2559               | 10196            |
| 2006         | State            | all_deer     | R         | 127014  | 925832  | 7               | 115878        | 65358 | 48709 | 1217  | 6584 | 107761 | 23114              | 40349            |
| 2006         | State            | all_deer     | SUM       | 153770  | 1088328 | 7               | 136054        | 78307 | 55671 | 1404  | 7677 | 126593 | 25673              | 50544            |
| 2006         | State            | md           | N         | 26756   | 162497  | 6               | 13203         | 9118  | 3979  | 71    | 471  | 12587  | 2041               | 6961             |
| 2006         | State            | md           | R         | 127014  | 925832  | 7               | 51733         | 34268 | 16988 | 325   | 1448 | 49609  | 14019              | 19514            |
| 2006         | State            | md           | SUM       | 153770  | 1088328 | 7               | 64936         | 43386 | 20966 | 395   | 1919 | 62195  | 16060              | 26475            |
| 2006         | State            | wt           | N         | 26756   | 162497  | 6               | 6541          | 3524  | 2881  | 114   | 598  | 5863   | 441                | 3011             |
| 2006         | State            | wt           | R         | 127014  | 925832  | 7               | 62450         | 30247 | 31092 | 874   | 5037 | 56714  | 8793               | 20336            |
| 2006         | State            | wt           | SUM       | 153770  | 1088328 | 7               | 68991         | 33771 | 33973 | 987   | 5635 | 62577  | 9233               | 23347            |
| 2007         | State            | all_deer     | N         | 28104   | 164330  | 6               | 21549         | 13497 | 7823  | 228   | 967  | 20582  | 2834               | 10544            |
| 2007         | State            | all_deer     | R         | 128831  | 951148  | 7               | 104317        | 55307 | 47684 | 1326  | 5278 | 99039  | 18334              | 36127            |
| 2007         | State            | all_deer     | SUM       | 156935  | 1115478 | 7               | 125866        | 68804 | 55508 | 1554  | 6245 | 119621 | 21168              | 46671            |

| License Year | Hunting District | Deer Species | Residency | Hunters | Days    | Days per Hunter | Total Harvest | Bucks | Does  | Fawns | Bow  | Rifle  | Less than 4 Points | 4 or More Points |
|--------------|------------------|--------------|-----------|---------|---------|-----------------|---------------|-------|-------|-------|------|--------|--------------------|------------------|
| 2007         | State            | md           | N         | 28104   | 164330  | 6               | 14725         | 10041 | 4587  | 97    | 416  | 14309  | 2461               | 7512             |
| 2007         | State            | md           | R         | 128831  | 951148  | 7               | 48410         | 29648 | 18466 | 296   | 1141 | 47269  | 11841              | 17567            |
| 2007         | State            | md           | SUM       | 156935  | 1115478 | 7               | 63135         | 39689 | 23053 | 393   | 1557 | 61578  | 14302              | 25079            |
| 2007         | State            | wt           | N         | 28104   | 164330  | 6               | 6824          | 3457  | 3237  | 131   | 551  | 6273   | 373                | 3032             |
| 2007         | State            | wt           | R         | 128831  | 951148  | 7               | 55907         | 25659 | 29218 | 1030  | 4137 | 51770  | 6493               | 18560            |
| 2007         | State            | wt           | SUM       | 156935  | 1115478 | 7               | 62731         | 29115 | 32455 | 1161  | 4688 | 58043  | 6866               | 21592            |
| 2008         | State            | all_deer     | N         | 27299   | 166395  | 6               | 20197         | 12448 | 7561  | 188   | 804  | 19393  | 2759               | 9603             |
| 2008         | State            | all_deer     | R         | 133543  | 1031519 | 8               | 95545         | 51436 | 42839 | 1269  | 4580 | 90964  | 17055              | 33535            |
| 2008         | State            | all_deer     | SUM       | 160842  | 1197914 | 7               | 115741        | 63884 | 50400 | 1457  | 5385 | 110357 | 19814              | 43138            |
| 2008         | State            | md           | N         | 27299   | 166395  | 6               | 13721         | 8941  | 4686  | 94    | 348  | 13373  | 2403               | 6497             |
| 2008         | State            | md           | R         | 133543  | 1031519 | 8               | 44717         | 27364 | 16988 | 365   | 1121 | 43596  | 10899              | 16187            |
| 2008         | State            | md           | SUM       | 160842  | 1197914 | 7               | 58438         | 36306 | 21673 | 460   | 1469 | 56969  | 13302              | 22684            |
| 2008         | State            | wt           | N         | 27299   | 166395  | 6               | 6476          | 3507  | 2875  | 94    | 456  | 6020   | 357                | 3105             |
| 2008         | State            | wt           | R         | 133543  | 1031519 | 8               | 50827         | 24072 | 25852 | 904   | 3459 | 47368  | 6156               | 17349            |
| 2008         | State            | wt           | SUM       | 160842  | 1197914 | 7               | 57303         | 27579 | 28727 | 997   | 3915 | 53388  | 6513               | 20454            |
| 2009         | State            | all_deer     | N         | 25863   | 161216  | 6               | 19180         | 11901 | 7056  | 222   | 693  | 18488  | 2663               | 9159             |
| 2009         | State            | all_deer     | R         | 132985  | 993099  | 8               | 85904         | 47640 | 37237 | 1027  | 3921 | 81982  | 15466              | 31256            |
| 2009         | State            | all_deer     | SUM       | 158848  | 1154315 | 7               | 105084        | 59542 | 44293 | 1249  | 4614 | 100470 | 18130              | 40414            |
| 2009         | State            | md           | N         | 25863   | 161216  | 6               | 12771         | 8657  | 4028  | 87    | 270  | 12501  | 2270               | 6330             |
| 2009         | State            | md           | R         | 132985  | 993099  | 8               | 40909         | 25347 | 15271 | 291   | 843  | 40066  | 9659               | 15274            |
| 2009         | State            | md           | SUM       | 158848  | 1154315 | 7               | 53680         | 34003 | 19299 | 378   | 1113 | 52567  | 11929              | 21604            |
| 2009         | State            | wt           | N         | 25863   | 161216  | 6               | 6409          | 3245  | 3029  | 136   | 423  | 5986   | 393                | 2829             |
| 2009         | State            | wt           | R         | 132985  | 993099  | 8               | 44995         | 22294 | 21965 | 736   | 3079 | 41916  | 5807               | 15982            |
| 2009         | State            | wt           | SUM       | 158848  | 1154315 | 7               | 51404         | 25538 | 24994 | 872   | 3502 | 47902  | 6201               | 18811            |
| 2010         | State            | all_deer     | N         | 26090   | 177228  | 7               | 18594         | 12679 | 5739  | 177   | 727  | 17867  | 2941               | 9730             |
| 2010         | State            | all_deer     | R         | 126049  | 944804  | 8               | 76136         | 46141 | 29040 | 956   | 3353 | 72784  | 15617              | 30467            |
| 2010         | State            | all_deer     | SUM       | 152139  | 1122032 | 7               | 94730         | 58819 | 34778 | 1133  | 4080 | 90650  | 18559              | 40197            |
| 2010         | State            | md           | N         | 26090   | 177228  | 7               | 11583         | 8995  | 2529  | 59    | 266  | 11317  | 2484               | 6506             |
| 2010         | State            | md           | R         | 126049  | 944804  | 8               | 32395         | 21978 | 10165 | 251   | 672  | 31723  | 8841               | 13115            |
| 2010         | State            | md           | SUM       | 152139  | 1122032 | 7               | 43978         | 30973 | 12694 | 311   | 938  | 43040  | 11325              | 19620            |
| 2010         | State            | wt           | N         | 26090   | 177228  | 7               | 7011          | 3684  | 3210  | 117   | 461  | 6550   | 458                | 3225             |
| 2010         | State            | wt           | R         | 126049  | 944804  | 8               | 43742         | 24162 | 18875 | 705   | 2681 | 41060  | 6776               | 17352            |
| 2010         | State            | wt           | SUM       | 152139  | 1122032 | 7               | 50753         | 27846 | 22085 | 822   | 3142 | 47610  | 7234               | 20577            |
| 2011         | State            | all_deer     | N         | 25266   | 156612  | 6               | 15705         | 11789 | 3782  | 134   | 685  | 15019  | 2750               | 9033             |
| 2011         | State            | all_deer     | R         | 122527  | 953993  | 8               | 66284         | 40287 | 25181 | 817   | 3377 | 62907  | 15533              | 24695            |
| 2011         | State            | all_deer     | SUM       | 147793  | 1110605 | 8               | 81989         | 52076 | 28962 | 950   | 4063 | 77926  | 18283              | 33728            |
| 2011         | State            | md           | N         | 25266   | 156612  | 6               | 10217         | 8839  | 1347  | 32    | 278  | 9939   | 2364               | 6474             |
| 2011         | State            | md           | R         | 122527  | 953993  | 8               | 28289         | 20184 | 7920  | 185   | 733  | 27556  | 8891               | 11257            |
| 2011         | State            | md           | SUM       | 147793  | 1110605 | 8               | 38506         | 29022 | 9267  | 217   | 1011 | 37496  | 11255              | 17730            |
| 2011         | State            | wt           | N         | 25266   | 156612  | 6               | 5487          | 2951  | 2435  | 102   | 408  | 5080   | 386                | 2559             |
| 2011         | State            | wt           | R         | 122527  | 953993  | 8               | 37995         | 20103 | 17260 | 632   | 2645 | 35350  | 6642               | 13439            |

| License Year | Hunting District | Deer Species | Residency | Hunters | Days    | Days per Hunter | Total Harvest | Bucks | Does  | Fawns | Bow  | Rifle  | Less than 4 Points | 4 or More Points |
|--------------|------------------|--------------|-----------|---------|---------|-----------------|---------------|-------|-------|-------|------|--------|--------------------|------------------|
| 2011         | State            | wt           | SUM       | 147793  | 1110605 | 8               | 43482         | 23054 | 19695 | 733   | 3052 | 40430  | 7029               | 15998            |
| 2012         | State            | all_deer     | N         | 24904   | 0       | 0               | 16353         | 12690 | 3571  | 93    | 678  | 15675  | 3537               | 9140             |
| 2012         | State            | all_deer     | R         | 122967  | 0       | 0               | 71285         | 44655 | 25972 | 658   | 4061 | 67224  | 17314              | 27280            |
| 2012         | State            | all_deer     | SUM       | 147870  | 0       | 0               | 87638         | 57345 | 29542 | 751   | 4740 | 82898  | 20850              | 36420            |
| 2012         | State            | md           | N         | 24904   | 0       | 0               | 10136         | 9171  | 943   | 22    | 280  | 9855   | 2974               | 6197             |
| 2012         | State            | md           | R         | 122967  | 0       | 0               | 27658         | 21648 | 5890  | 120   | 715  | 26942  | 9828               | 11810            |
| 2012         | State            | md           | SUM       | 147870  | 0       | 0               | 37793         | 30819 | 6832  | 142   | 996  | 36798  | 12803              | 18007            |
| 2012         | State            | wt           | N         | 24904   | 0       | 0               | 6217          | 3519  | 2628  | 71    | 398  | 5819   | 562                | 2943             |
| 2012         | State            | wt           | R         | 122967  | 0       | 0               | 43627         | 23007 | 20082 | 538   | 3346 | 40281  | 7485               | 15470            |
| 2012         | State            | wt           | SUM       | 147870  | 0       | 0               | 49844         | 26526 | 22710 | 609   | 3744 | 46101  | 8048               | 18414            |
| 2013         | State            | all_deer     | N         | 26346   | 164760  | 6               | 16292         | 13243 | 2959  | 91    | 518  | 15775  | 3662               | 9553             |
| 2013         | State            | all_deer     | R         | 123764  | 972808  | 8               | 61945         | 42026 | 19373 | 546   | 3486 | 58460  | 17310              | 24645            |
| 2013         | State            | all_deer     | SUM       | 150110  | 1137568 | 8               | 78238         | 55269 | 22331 | 637   | 4003 | 74234  | 20973              | 34198            |
| 2013         | State            | md           | N         | 26346   | 164760  | 6               | 10706         | 9737  | 942   | 27    | 224  | 10482  | 3085               | 6649             |
| 2013         | State            | md           | R         | 123764  | 972808  | 8               | 27088         | 21730 | 5217  | 141   | 655  | 26433  | 10165              | 11556            |
| 2013         | State            | md           | SUM       | 150110  | 1137568 | 8               | 37794         | 31467 | 6158  | 168   | 879  | 36915  | 13251              | 18206            |
| 2013         | State            | wt           | N         | 26346   | 164760  | 6               | 5586          | 3506  | 2017  | 63    | 294  | 5293   | 577                | 2904             |
| 2013         | State            | wt           | R         | 123764  | 972808  | 8               | 34858         | 20296 | 14156 | 406   | 2831 | 32027  | 7145               | 13089            |
| 2013         | State            | wt           | SUM       | 150110  | 1137568 | 8               | 40444         | 23802 | 16173 | 469   | 3124 | 37320  | 7722               | 15993            |
| 2014         | State            | all_deer     | N         | 25133   | 0       | 0               | 15173         | 13562 | 1575  | 37    | 665  | 14509  | 3935               | 9622             |
| 2014         | State            | all_deer     | R         | 119505  | 0       | 0               | 60507         | 48531 | 11538 | 438   | 3078 | 57429  | 19390              | 29108            |
| 2014         | State            | all_deer     | SUM       | 144638  | 0       | 0               | 75680         | 62093 | 13112 | 475   | 3743 | 71938  | 23324              | 38730            |
| 2014         | State            | md           | N         | 25133   | 0       | 0               | 9803          | 9694  | 108   | 1     | 309  | 9494   | 3237               | 6457             |
| 2014         | State            | md           | R         | 119505  | 0       | 0               | 24678         | 23822 | 823   | 33    | 589  | 24089  | 10841              | 12975            |
| 2014         | State            | md           | SUM       | 144638  | 0       | 0               | 34481         | 33515 | 931   | 35    | 898  | 33583  | 14078              | 19431            |
| 2014         | State            | wt           | N         | 25133   | 0       | 0               | 5371          | 3868  | 1467  | 36    | 356  | 5015   | 698                | 3166             |
| 2014         | State            | wt           | R         | 119505  | 0       | 0               | 35829         | 24710 | 10715 | 404   | 2489 | 33340  | 8549               | 16133            |
| 2014         | State            | wt           | SUM       | 144638  | 0       | 0               | 41199         | 28578 | 12181 | 440   | 2845 | 38355  | 9246               | 19298            |
| 2015         | State            | all_deer     | N         | 26225   | 0       | 0               | 17794         | 15282 | 2404  | 105   | 651  | 17101  | 4461               | 10816            |
| 2015         | State            | all_deer     | R         | 128966  | 0       | 0               | 68788         | 52960 | 15206 | 600   | 3245 | 65417  | 20557              | 32370            |
| 2015         | State            | all_deer     | SUM       | 155191  | 0       | 0               | 86582         | 68242 | 17610 | 705   | 3896 | 82517  | 25018              | 43186            |
| 2015         | State            | md           | N         | 26225   | 0       | 0               | 11918         | 11168 | 722   | 28    | 329  | 11561  | 3762               | 7404             |
| 2015         | State            | md           | R         | 128966  | 0       | 0               | 29814         | 27726 | 2018  | 70    | 634  | 29125  | 12362              | 15350            |
| 2015         | State            | md           | SUM       | 155191  | 0       | 0               | 41733         | 38894 | 2740  | 98    | 963  | 40686  | 16123              | 22754            |
| 2015         | State            | wt           | N         | 26225   | 0       | 0               | 5872          | 4114  | 1682  | 77    | 322  | 5539   | 699                | 3412             |
| 2015         | State            | wt           | R         | 128966  | 0       | 0               | 38951         | 25234 | 13188 | 530   | 2611 | 36291  | 8196               | 17020            |
| 2015         | State            | wt           | SUM       | 155191  | 0       | 0               | 44823         | 29347 | 14870 | 607   | 2932 | 41831  | 8895               | 20431            |
| 2016         | State            | all_deer     | N         | 26486   | 167003  | 6               | 19556         | 15653 | 3791  | 112   | 848  | 18708  | 4530               | 11119            |
| 2016         | State            | all_deer     | R         | 132410  | 1003970 | 8               | 85742         | 61387 | 23704 | 651   | 4437 | 81305  | 24801              | 36553            |
| 2016         | State            | all_deer     | SUM       | 158896  | 1170973 | 7               | 105298        | 77040 | 27495 | 763   | 5285 | 100013 | 29331              | 47672            |
| 2016         | State            | md           | N         | 26486   | 167003  | 6               | 14003         | 12093 | 1851  | 59    | 440  | 13563  | 3984               | 8106             |

| License Year | Hunting District | Deer Species | Residency | Hunters | Days    | Days per Hunter | Total Harvest | Bucks | Does  | Fawns | Bow  | Rifle | Less than 4 Points | 4 or More Points |
|--------------|------------------|--------------|-----------|---------|---------|-----------------|---------------|-------|-------|-------|------|-------|--------------------|------------------|
| 2016         | State            | md           | R         | 132410  | 1003970 | 8               | 41273         | 33472 | 7600  | 201   | 1026 | 40247 | 15240              | 18229            |
| 2016         | State            | md           | SUM       | 158896  | 1170973 | 7               | 55276         | 45564 | 9451  | 260   | 1465 | 53810 | 19224              | 26334            |
| 2016         | State            | wt           | N         | 26486   | 167003  | 6               | 5553          | 3561  | 1940  | 53    | 408  | 5145  | 546                | 3014             |
| 2016         | State            | wt           | R         | 132410  | 1003970 | 8               | 44469         | 27915 | 16104 | 451   | 3412 | 41057 | 9561               | 18324            |
| 2016         | State            | wt           | SUM       | 158896  | 1170973 | 7               | 50023         | 31476 | 18044 | 503   | 3820 | 46203 | 10106              | 21338            |
| 2017         | State            | all_deer     | N         | 26646   | 159741  | 6               | 20657         | 15404 | 5188  | 66    | 795  | 19862 | 3982               | 11419            |
| 2017         | State            | all_deer     | R         | 125567  | 896044  | 7               | 83843         | 57290 | 26022 | 531   | 4292 | 79551 | 20811              | 36434            |
| 2017         | State            | all_deer     | SUM       | 152213  | 1055785 | 7               | 104500        | 72694 | 31209 | 597   | 5087 | 99413 | 24793              | 47853            |
| 2017         | State            | md           | N         | 26646   | 159741  | 6               | 14998         | 11907 | 3061  | 31    | 410  | 14589 | 3371               | 8535             |
| 2017         | State            | md           | R         | 125567  | 896044  | 7               | 40546         | 30945 | 9407  | 195   | 1170 | 39376 | 12319              | 18615            |
| 2017         | State            | md           | SUM       | 152213  | 1055785 | 7               | 55545         | 42851 | 12468 | 226   | 1580 | 53965 | 15690              | 27151            |
| 2017         | State            | wt           | N         | 26646   | 159741  | 6               | 5659          | 3497  | 2127  | 35    | 386  | 5273  | 611                | 2884             |
| 2017         | State            | wt           | R         | 125567  | 896044  | 7               | 43297         | 26346 | 16615 | 337   | 3122 | 40175 | 8493               | 17818            |
| 2017         | State            | wt           | SUM       | 152213  | 1055785 | 7               | 48956         | 29843 | 18741 | 371   | 3508 | 45448 | 9103               | 20702            |
| 2018         | State            | all_deer     | N         | 124736  | 0       | 0               | 20803         | 15130 | 5562  | 111   | 708  | 20096 | 3960               | 11148            |
| 2018         | State            | all_deer     | R         | 28548   | 0       | 0               | 76352         | 50495 | 25389 | 469   | 3696 | 72653 | 18273              | 32171            |
| 2018         | State            | all_deer     | SUM       | 153284  | 0       | 0               | 97156         | 65625 | 30951 | 580   | 4403 | 92749 | 22233              | 43320            |
| 2018         | State            | md           | N         | 124736  | 0       | 0               | 15457         | 12034 | 3371  | 51    | 373  | 15084 | 3453               | 8577             |
| 2018         | State            | md           | R         | 28548   | 0       | 0               | 36785         | 27267 | 9369  | 149   | 919  | 35866 | 11080              | 16174            |
| 2018         | State            | md           | SUM       | 153284  | 0       | 0               | 52242         | 39302 | 12740 | 200   | 1292 | 50950 | 14533              | 24751            |
| 2018         | State            | wt           | N         | 124736  | 0       | 0               | 5347          | 3096  | 2191  | 60    | 335  | 5012  | 507                | 2571             |
| 2018         | State            | wt           | R         | 28548   | 0       | 0               | 39567         | 23228 | 16020 | 320   | 2777 | 36788 | 7193               | 15997            |
| 2018         | State            | wt           | SUM       | 153284  | 0       | 0               | 44914         | 26323 | 18211 | 380   | 3111 | 41800 | 7700               | 18568            |
