# Supplementary material for: The Elephant in the room: What can we learn from California regarding the use of sport hunting of pumas (Puma concolor) as a management tool?
Source: PLOS journal article supplement (doi:10.1371/journal.pone.0224638), 2020-02-13
Supplement: S3 (10.1371/journal.pone.0224638.s003) [file journal.pone.0224638.s003]

# Hunt Arizona

2009 Edition

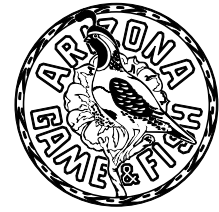

*Survey, Harvest and Hunt Data for Big and Small Game*

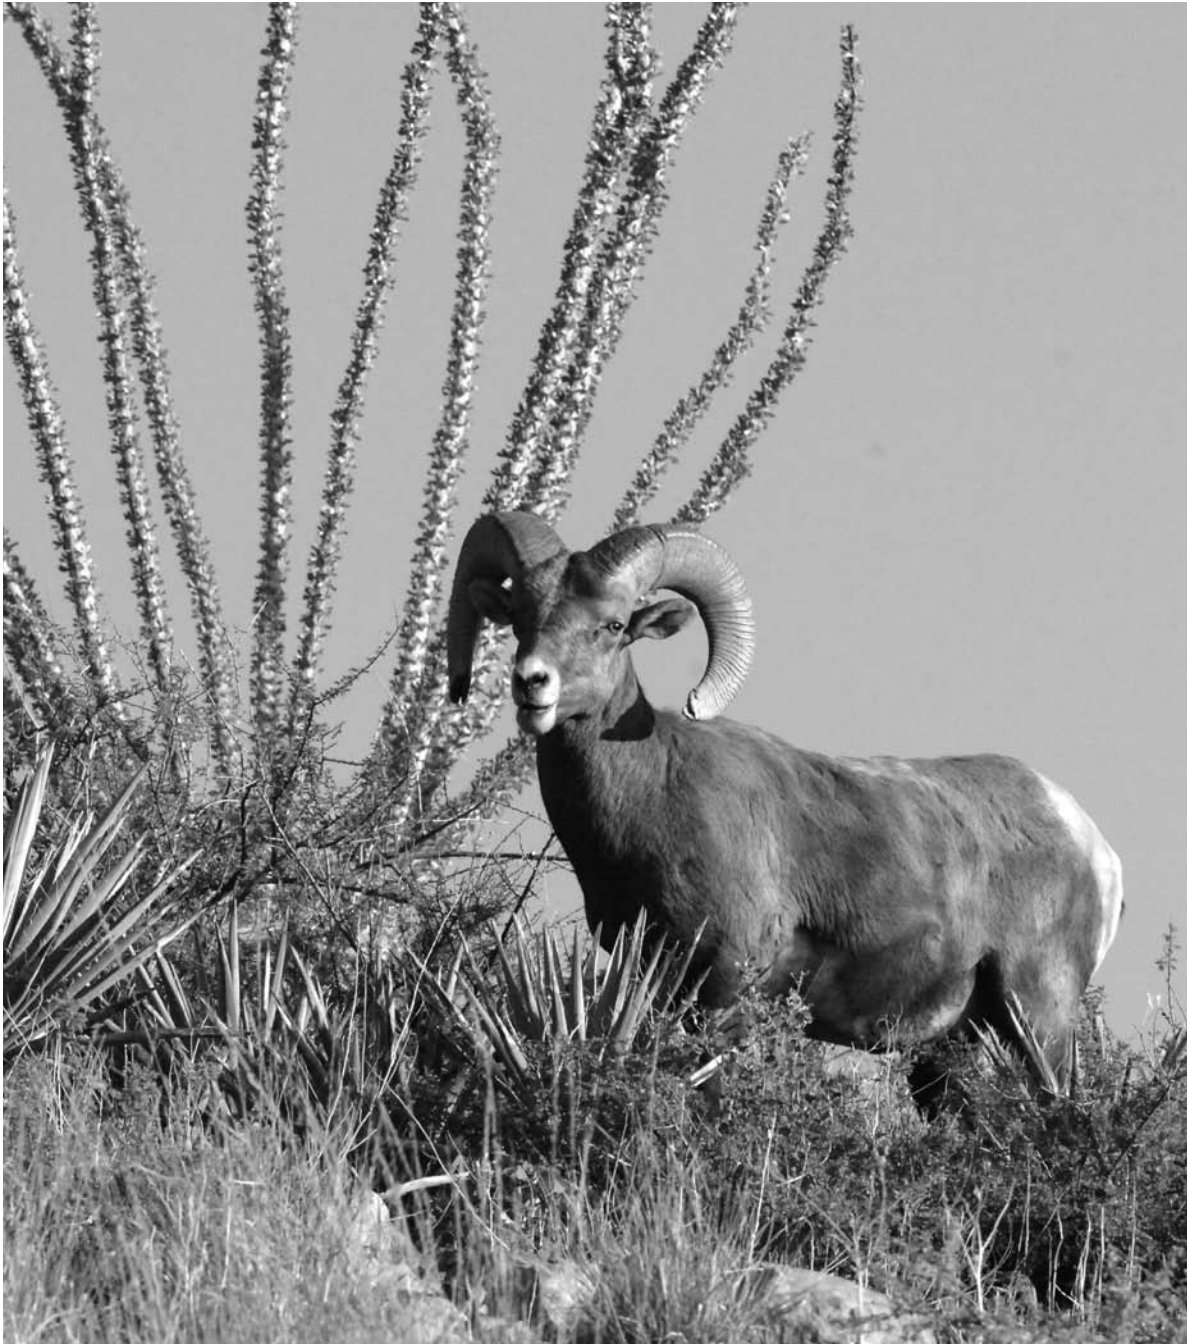

ARIZONA GAME AND FISH DEPARTMENT

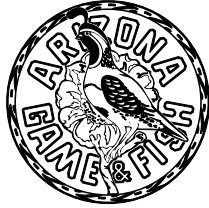

## ARIZONA GAME AND FISH COMMISSION

Bob Hernbrode, Chair..... Tucson  
Jennifer L. Martin ..... Phoenix  
Robert R. Woodhouse ..... Roll  
Norman W. Freeman ..... Chino Valley  
Jack F. Husted..... Springerville

## ARIZONA GAME AND FISH DEPARTMENT

5000 W. Carefree Highway  
Phoenix, AZ 85086  
(602) 942-3000  
[www.azgfd.gov](http://www.azgfd.gov)

Larry D. Voyles..... Director  
Gary R. Hovatter..... Deputy Director  
Robert D. Broscheid..... Deputy Director

## ASSISTANT DIRECTORS

Mike Senn..... Wildlife Management  
Harry Seck ..... Special Services  
Ty Gray ..... Information and Education

## REGIONAL OFFICES

**Region I — Jon Cooley, Supervisor**  
2878 E. White Mountain Blvd., Pinetop, AZ 85935, (928) 367-4281  
**Region II — Ron Sieg, Supervisor**  
3500 S. Lake Mary Road, Flagstaff, AZ 86001, (928) 774-5045  
**Region III — Bob Posey, Supervisor**  
5325 N. Stockton Hill Rd., Kingman, AZ 86409, (928) 692-7700  
**Region IV — Pat Barber, Supervisor**  
9140 E. 28th St., Yuma, AZ 85365, (928) 342-0091  
**Region V — Leonard Ordway, Supervisor**  
555 N. Greasewood Rd., Tucson, AZ 85745, (520) 628-5376  
**Region VI — Rod Lucas, Supervisor**  
7200 E. University, Mesa, AZ 85207, (480) 981-9400

*Published by the Arizona Game and Fish Department  
Information and Education Division, Information Branch, Publications Section  
©May 2009*

Cover photograph: George Andrejko

The Arizona Game and Fish Department prohibits discrimination on the basis of race, color, sex, national origin, age, or disability in its programs and activities. If anyone believes that they have been discriminated against in any of the AGFD's programs or activities, including employment practices, they may file a complaint with the Director's Office, 5000 W. Carefree Highway Phoenix, AZ 85086, (602) 942-3000, or with the Fish and Wildlife Service, 4040 N. Fairfax Dr. Ste. 130, Arlington, VA 22203. Persons with a disability may request a reasonable accommodation or this document in an alternative format by contacting the Director's Office as listed above.

# Table of Contents

|                                                    |                                    |     |                                      |            |
|----------------------------------------------------|------------------------------------|-----|--------------------------------------|------------|
| <b>How to Use Survey and Harvest Data.....</b> 1-2 | Harvest Data .....                 | 141 | Trapping.....                        | 167        |
| Bonus Points by Species.....                       | Hunt Data .....                    | 142 |                                      |            |
|                                                    |                                    |     |                                      |            |
| <b>Deer</b>                                        | <b>Small Game</b>                  |     | <b>Predator and Furbearer</b>        |            |
| Mule Deer Natural History .....                    | Quail.....                         | 147 | Harvest Data .....                   | 168        |
| Mule Deer Hunt History.....                        | Natural History.....               | 147 |                                      |            |
| White-tailed Deer Natural History .....            | Hunt History .....                 | 148 | <b>Waterfowl</b>                     |            |
| White-tailed Deer Hunt History.....                | White-winged Dove .....            | 149 | Natural History .....                | 170        |
| Survey Data .....                                  | Natural History.....               | 149 | Hunt History .....                   | 171        |
| Harvest Data .....                                 | Hunt History .....                 | 150 | Survey and Harvest Data.....         | 173        |
| Hunt Data .....                                    | Mourning Dove .....                | 150 |                                      |            |
|                                                    | Natural History.....               | 150 | <b>Sandhill Crane</b>                |            |
|                                                    | Hunt History .....                 | 151 | Natural History .....                | 175        |
| <b>Pronghorn Antelope</b>                          | Cottontail Rabbit.....             | 151 | Hunt History .....                   | 176        |
| Natural History .....                              | Natural History.....               | 151 | Harvest Data .....                   | 177        |
| Hunt History .....                                 | Hunt History .....                 | 152 |                                      |            |
| Survey Data .....                                  | Tree Squirrels.....                | 152 | <b>Other Birds and Mammals</b>       |            |
| Harvest Data .....                                 | Natural History.....               | 152 | Pigeon (Rock Dove) .....             | 178        |
| Hunt Data .....                                    | Hunt History .....                 | 153 | Natural History and Status.....      | 178        |
|                                                    | Band-tailed Pigeon.....            | 153 | House (English) Sparrow .....        | 178        |
| <b>Elk</b>                                         | Natural History.....               | 153 | Natural History and Status.....      | 178        |
| Natural History .....                              | Hunt History .....                 | 153 | European Starling.....               | 179        |
| Hunt History .....                                 | Blue Grouse .....                  | 153 | Natural History and Status.....      | 179        |
| Survey Data .....                                  | Natural History.....               | 153 | Peach-faced Lovebird.....            | 179        |
| Harvest Data .....                                 | Hunt History .....                 | 154 | Natural History and Status.....      | 179        |
| Hunt Data .....                                    | Pheasant.....                      | 154 | American Crow .....                  | 179        |
|                                                    | Natural History.....               | 154 | Natural History and Status.....      | 180        |
| <b>Turkey</b>                                      | Hunt History .....                 | 154 | Coati.....                           | 180        |
| Natural History .....                              | Small Game Harvest Data .....      | 155 | Natural History and Status.....      | 180        |
| Hunt History .....                                 |                                    |     | Gunnison's Prairie Dog.....          | 181        |
| Survey Data .....                                  | <b>Predators</b>                   |     | Natural History and Status.....      | 181        |
| Harvest Data .....                                 | Coyotes.....                       | 159 | Black-tailed Prairie Dog.....        | 181        |
| Hunt Data .....                                    | Natural History.....               | 159 | Natural History and Status.....      | 181        |
|                                                    | Hunting and Trapping History ..... | 159 | Specially Protected Mammals.....     | 181        |
| <b>Javelina</b>                                    | Bobcats .....                      | 160 | Bats .....                           | 181        |
| Natural History .....                              | Natural History.....               | 160 | Natural History and Status.....      | 181        |
| Hunt History .....                                 | Hunting and Trapping History ..... | 160 | Black-footed Ferret.....             | 182        |
| Survey Data .....                                  | Foxes .....                        | 160 | Natural History and Status.....      | 182        |
| Harvest Data .....                                 | Natural History.....               | 161 | Hualapai Mexican Vole .....          | 182        |
| Hunt Data .....                                    | Hunting and Trapping History ..... | 161 | Natural History and Status.....      | 182        |
|                                                    | Skunks .....                       | 161 | Jaguar.....                          | 183        |
| <b>Bighorn Sheep</b>                               | Natural History.....               | 162 | Natural History and Status.....      | 183        |
| Natural History .....                              | Trapping History.....              | 162 | Jaguarundi.....                      | 183        |
| Hunt History .....                                 |                                    |     | Natural History and Status.....      | 183        |
| Survey Data .....                                  | <b>Furbearers</b>                  |     | Ocelot.....                          | 183        |
| Harvest Data .....                                 | Beaver .....                       | 163 | Natural History and Status.....      | 184        |
| Hunt Data .....                                    | Natural History.....               | 163 | Otter (see Furbearers) .....         | 184        |
| Successful Hunter Scores .....                     | Trapping History.....              | 164 | Porcupine .....                      | 184        |
| Measurement Data.....                              | Muskrat .....                      | 164 | Natural History and Status.....      | 184        |
| Hunt Application Data .....                        | Natural History.....               | 164 | Gray Wolf .....                      | 185        |
|                                                    | Trapping History.....              | 164 | Natural History and Status.....      | 185        |
| <b>Buffalo</b>                                     | Raccoon.....                       | 164 |                                      |            |
| Natural History .....                              | Natural History.....               | 165 | <b>Game Management Unit Map.....</b> | <b>191</b> |
| Hunt History .....                                 | Trapping and Hunt History .....    | 165 |                                      |            |
| Survey Data .....                                  | Ringtail.....                      | 165 |                                      |            |
| Harvest Data .....                                 | Natural History.....               | 165 |                                      |            |
| Hunt Data .....                                    | Trapping History.....              | 165 |                                      |            |
|                                                    | Otter.....                         | 166 |                                      |            |
| <b>Black Bear</b>                                  | Natural History.....               | 166 |                                      |            |
| Natural History .....                              | Trapping and Hunt History .....    | 166 |                                      |            |
| Hunt History .....                                 | Weasel.....                        | 166 |                                      |            |
| Harvest Data .....                                 | Natural History.....               | 166 |                                      |            |
| Hunt Data .....                                    | Trapping History.....              | 166 |                                      |            |
|                                                    | Badger.....                        | 167 |                                      |            |
| <b>Mountain Lion</b>                               | Natural History.....               | 167 |                                      |            |
| Natural History .....                              | Trapping History.....              | 167 |                                      |            |
| Hunt History .....                                 |                                    |     |                                      |            |

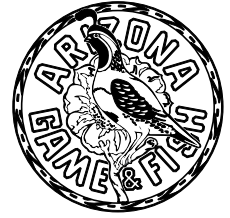

# www.azgfd.gov

## Arizona Small and Big Game Hunt Information Now Available on the World Wide Web

Written by Arizona  
Game and Fish  
Department Wildlife  
Managers

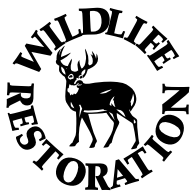

Your purchase  
of hunting equipment  
supports Wildlife  
Restoration

Hunting information is available for deer, elk, antelope, bighorn sheep, javelina, turkey, quail, dove, tree squirrel, waterfowl and other small and big game species. The more than 470 written accounts provide hunt forecasts, areas to hunt, access information, and tips to improve hunt success for 80 game management units statewide. Best of all, the new, up-to-date information was written by Arizona Game and Fish Department Wildlife Managers. These professionals are on the ground everyday and are now sharing their knowledge with you in a way that's easy to access. Go to [www.azgfd.gov](http://www.azgfd.gov) and click on the Wildlife & Fish link then click on Statewide, Unit by Unit Hunting Information. It's that easy!

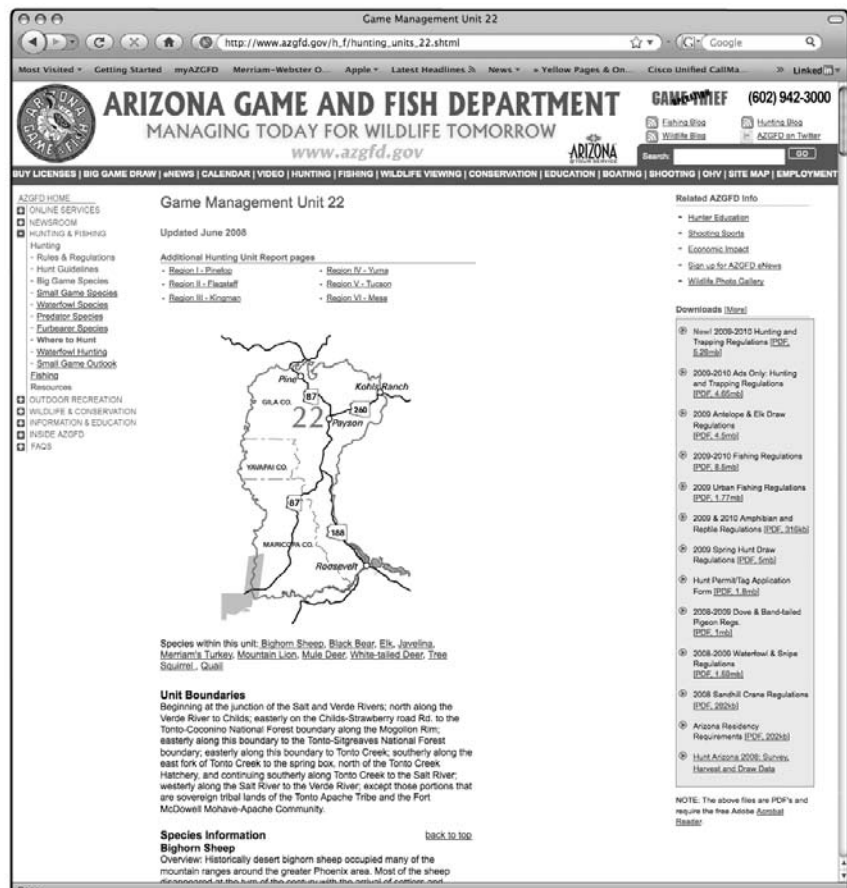

(Actual web page for Unit 22 - Bighorn Sheep showing just part of the information available.)

---

# How to Use Survey and Harvest Data

---

Both novice and experienced hunters will find this book a valuable resource to help in making informed decisions regarding hunt selections. The book is a compendium of facts about hunting in Arizona, including up-to-date information on:

- Which game management units have the most big-game permits,
- The units with the narrowest male to female ratios,
- Units and hunts with the highest hunt success,
- Hunts that have the best drawing odds, and
- Historical survey and hunt information the reader can use to compare trends for the major game species in each management unit.

The information is relatively simple to use. Looking through the section on deer, for example, you will find a summary of the survey data for both mule deer and white-tailed deer in each game management unit having these species. This information will help you determine whether a unit has a high proportion of bucks and whether it is experiencing good fawn production. Bear in mind, however, that due to differences in survey methods the male to female and female to young ratios are only estimates.

By checking the unit hunt information summary, you can determine the hunter success rate, how many permits were available in the past, and the drawing odds for previous hunts. Be aware that some units have several authorized hunts, each limited to a specific kind (or kinds) of weapon. Your selection of a hunt for which to apply will depend on your own preference of hunt area, weapon type, season dates, and the kind of animal you wish to harvest.

## *Beating the Odds*

Permits for big-game hunts in Arizona are issued through a drawing system. Since the best predictor of the future is the past, the best estimate of your draw odds for an upcoming hunt is the draw rate for that hunt in the previous draw. Draw odds for each hunt are calculated by dividing successful first choice applicants by the total first choice applicants. Even though some permits may have been issued to second choice appli-

cants, this method accurately reflects the applicant's chances of receiving their first choice.

The odds of receiving a permit for a second choice hunt instead of a first choice hunt are calculated by subtracting the draw rate for the first choice hunt from the draw rate for the second choice hunt. The odds for receiving your first or second choice would therefore be the same as your highest odds choice. For example, if your first choice selection had a 40 percent draw rate last year, and your second choice selection had a 60 percent draw rate, your odds this year are 40 percent for getting your first choice, 20 percent for getting your second choice, and 60 percent overall (assuming that the results of this year's draw will be similar to those of the previous draw). It therefore makes little sense to apply for a second choice hunt with a lower draw rate than your first choice hunt. Only those hunts that did not fill with first or second choice applications are considered for third, fourth, or fifth choices. Therefore, only hunts with draw odds of 100 percent are good candidates for these choices.

While draw rates are relatively favorable for most deer, turkey and javelina hunts, they are much more competitive for elk, antelope, buffalo, and bighorn sheep. Beginning in 1991, the Arizona Game and Fish Department began issuing bonus points to unsuccessful applicants for these species. In 1999, unsuccessful applicants for deer began to receive bonus points. In 2005, turkey, javelina, and spring bear began receiving bonus points. Each point accumulated gives the applicant an extra entry in the hunt drawing for that species. For more information about the bonus point system, please refer to R12-4-107 in the 2009-2010 Hunting Regulations.

A summary of 2008 draw odds seems to indicate little advantage to having many bonus points. Further analysis, however, reveals that applicants with the largest number of bonus points are applying for hunts with the poorest draw odds, which obscures the benefits of having multiple bonus points. For example, elk applicants without any bonus points applied for hunts with draw odds that averaged 25 percent, while those with 19 bonus points applied for hunts with draw odds averaging less than 1.0 percent. This tendency held true for their second choices as well.



## How to Use Survey and Harvest Data

Comparing applicants on the basis of their first choice hunts reveals a truer picture of the advantages of bonus points, particularly for those applying for hunts with high draw odds. General antelope applicants with 19 bonus points, for example, were drawn for their first choice hunt at over 83 times the rate of applicants with no bonus points (83.3 percent versus 0.2 percent). General elk applicants with 19 bonus points were drawn for their first choice hunt at over 88 times the rate of applicants with no bonus points (100 percent versus 11.9 percent).

Draw odds in the tables contained in this report are computed without regard to numbers of bonus points and therefore represent your odds if you have an average number of bonus points. In the 2009 draw, the average applicant for elk tags will have about 2.9 bonus points while those applying for

antelope, bighorn sheep, buffalo, and deer tags will have 6.0, 6.8, 6.5, and 1.9 respectively.

Another point to consider when choosing hunts is the number of people on your application. This can be an important factor when applying for hunts with low numbers of permits, since no permits will be issued if there are not enough for everyone on the application. Applying with three other people for a 10-permit hunt, for example, cuts your odds by 30 percent. Applying with people who have fewer bonus points than you have will also decrease your odds, since the number of bonus points assigned to an application is the average accumulated by the group.

One last tip to keep in mind is that new hunts, or hunts in which permits have been recently increased, generally have slightly better draw odds than other hunts. Conversely, hunts with reduced numbers of permits generally have poorer odds.

## Bonus Points By Species

*Bonus points listed below include the permanent hunter education point and the loyalty point (earn by submitting a valid application for 5 consecutive years).*

For all species except antelope and elk, the tables below are a summary of group bonus points resulting from the 2008 Fall Draw (Section A) and individual bonus points going into the 2009 Fall Draw (Section B). For antelope and elk, the tables are a summary of group bonus points resulting from the 2009 Antelope and Elk Draw (Section A) and individual bonus points going into the 2010 Antelope and Elk Draw (Section B). Group bonus points are the average number of bonus points per hunt application. A hunt application can be submitted with 1 to 4 applicants. The bonus points, which may differ for each individual on an application, are averaged to come up with "group bonus points." Individual bonus points in Section B are the count of

all hunters in each bonus point level. Both group and individual bonus points include the permanent hunter education point and the loyalty point. All potential hunters may not be represented in Section A if an individual with bonus points did not apply during the recent Draw. Also, keep in mind that applicants with the greatest number of bonus points often apply for hunts with poorest draw odds, which obscures the benefits of having multiple bonus points. Refer to the narrative on the previous pages about "Beating the Odds."

Remember, all potential hunters may not apply in a given year. Also, Section A does NOT reflect individuals who may have purchased a bonus point for a given species.

### DEER

| A                                                |                                                           |                                                                       | B                                                     |                                                           |             |         |
|--------------------------------------------------|-----------------------------------------------------------|-----------------------------------------------------------------------|-------------------------------------------------------|-----------------------------------------------------------|-------------|---------|
| RESULTS OF THE 2008 FALL DRAW                    |                                                           |                                                                       | GOING INTO 2009 FALL DRAW                             |                                                           |             |         |
| Group Bonus Points going into the 2008 Fall Draw | No. Hunters per Bonus Point going into the 2008 Fall Draw | Percent Drawn during the 2008 Fall Draw within a Bonus Point grouping | Individual Bonus Points going into the 2009 Fall Draw | No. Hunters per Bonus Point going into the 2009 Fall Draw |             |         |
|                                                  |                                                           |                                                                       |                                                       | Resident                                                  | Nonresident | Total   |
| 0                                                | 12,252                                                    | 56.4%                                                                 | 1                                                     | 106,140                                                   | 7,768       | 113,908 |
| 1                                                | 24,977                                                    | 66.8%                                                                 | 2                                                     | 29,281                                                    | 2,844       | 32,125  |
| 2                                                | 17,063                                                    | 64.8%                                                                 | 3                                                     | 9,979                                                     | 1,941       | 11,920  |
| 3                                                | 6,150                                                     | 59.1%                                                                 | 4                                                     | 4,102                                                     | 983         | 5,085   |
| 4                                                | 2,848                                                     | 54.6%                                                                 | 5                                                     | 1,850                                                     | 1,218       | 3,068   |
| 5                                                | 1,467                                                     | 41.7%                                                                 | 6                                                     | 1,012                                                     | 858         | 1,870   |
| 6                                                | 888                                                       | 33.3%                                                                 | 7                                                     | 578                                                       | 668         | 1,246   |
| 7                                                | 629                                                       | 25.9%                                                                 | 8                                                     | 394                                                       | 602         | 996     |
| 8                                                | 494                                                       | 15.4%                                                                 | 9                                                     | 267                                                       | 459         | 726     |
| 9                                                | 352                                                       | 11.7%                                                                 | 10                                                    | 150                                                       | 375         | 525     |
| 10                                               | 511                                                       | 11.2%                                                                 | 11                                                    | 118                                                       | 573         | 691     |
| 11                                               | 200                                                       | 32.0%                                                                 | 12                                                    | 61                                                        | 171         | 232     |

# How to Use Survey and Harvest Data

## Bonus Points by Species

**ANTELOPE** (Section A does NOT reflect individuals who purchased a bonus point)

| A                                                |                                                           |                                                                       | B                                                     |                                                           |             |        |
|--------------------------------------------------|-----------------------------------------------------------|-----------------------------------------------------------------------|-------------------------------------------------------|-----------------------------------------------------------|-------------|--------|
| RESULTS OF THE 2009 FALL DRAW                    |                                                           |                                                                       | GOING INTO 2010 FALL DRAW                             |                                                           |             |        |
| Group Bonus Points going into the 2009 Fall Draw | No. Hunters per Bonus Point going into the 2009 Fall Draw | Percent Drawn during the 2009 Fall Draw within a Bonus Point grouping | Individual Bonus Points going into the 2010 Fall Draw | No. Hunters per Bonus Point going into the 2010 Fall Draw |             |        |
|                                                  |                                                           |                                                                       |                                                       | Resident                                                  | Nonresident | Total  |
| 0                                                | 1,458                                                     | 1.1%                                                                  | 1                                                     | 86,360                                                    | 5,143       | 91,503 |
| 1                                                | 1,746                                                     | 1.7%                                                                  | 2                                                     | 9,414                                                     | 1,526       | 10,940 |
| 2                                                | 2,226                                                     | 2.2%                                                                  | 3                                                     | 5,894                                                     | 1,172       | 7,066  |
| 3                                                | 1,950                                                     | 2.3%                                                                  | 4                                                     | 3,824                                                     | 490         | 4,314  |
| 4                                                | 1,597                                                     | 3.5%                                                                  | 5                                                     | 2,854                                                     | 657         | 3,511  |
| 5                                                | 1,427                                                     | 5.1%                                                                  | 6                                                     | 2,904                                                     | 479         | 3,383  |
| 6                                                | 1,458                                                     | 5.4%                                                                  | 7                                                     | 2,333                                                     | 426         | 2,759  |
| 7                                                | 1,382                                                     | 5.1%                                                                  | 8                                                     | 2,130                                                     | 326         | 2,456  |
| 8                                                | 1,285                                                     | 4.0%                                                                  | 9                                                     | 1,819                                                     | 333         | 2,152  |
| 9                                                | 1,167                                                     | 7.4%                                                                  | 10                                                    | 1,597                                                     | 229         | 1,826  |
| 10                                               | 959                                                       | 7.0%                                                                  | 11                                                    | 1,340                                                     | 149         | 1,489  |
| 11                                               | 894                                                       | 5.6%                                                                  | 12                                                    | 1,104                                                     | 141         | 1,245  |
| 12                                               | 747                                                       | 6.0%                                                                  | 13                                                    | 939                                                       | 106         | 1,045  |
| 13                                               | 638                                                       | 7.8%                                                                  | 14                                                    | 833                                                       | 88          | 921    |
| 14                                               | 546                                                       | 6.4%                                                                  | 15                                                    | 730                                                       | 46          | 776    |
| 15                                               | 477                                                       | 8.2%                                                                  | 16                                                    | 594                                                       | 25          | 619    |
| 16                                               | 373                                                       | 7.0%                                                                  | 17                                                    | 433                                                       | 23          | 456    |
| 17                                               | 310                                                       | 11.3%                                                                 | 18                                                    | 339                                                       | 7           | 346    |
| 18                                               | 154                                                       | 27.3%                                                                 | 19                                                    | 175                                                       | 2           | 177    |
| 19                                               | 88                                                        | 65.9%                                                                 | 20                                                    | 59                                                        | 1           | 60     |
| 20                                               | 4                                                         | 100%                                                                  | 21                                                    | 8                                                         | 0           | 8      |

**ELK** (Section A does NOT reflect individuals who purchased a bonus point)

| A                                                |                                                           |                                                                       | B                                                     |                                                           |             |         |
|--------------------------------------------------|-----------------------------------------------------------|-----------------------------------------------------------------------|-------------------------------------------------------|-----------------------------------------------------------|-------------|---------|
| RESULTS OF THE 2009 FALL DRAW                    |                                                           |                                                                       | GOING INTO 2010 FALL DRAW                             |                                                           |             |         |
| Group Bonus Points going into the 2009 Fall Draw | No. Hunters per Bonus Point going into the 2009 Fall Draw | Percent Drawn during the 2009 Fall Draw within a Bonus Point grouping | Individual Bonus Points going into the 2010 Fall Draw | No. Hunters per Bonus Point going into the 2010 Fall Draw |             |         |
|                                                  |                                                           |                                                                       |                                                       | Resident                                                  | Nonresident | Total   |
| 0                                                | 10,445                                                    | 20.4%                                                                 | 1                                                     | 99,290                                                    | 11,552      | 110,842 |
| 1                                                | 18,505                                                    | 32.6%                                                                 | 2                                                     | 34,506                                                    | 4,763       | 39,269  |
| 2                                                | 18,160                                                    | 36.4%                                                                 | 3                                                     | 18,062                                                    | 3,316       | 21,378  |
| 3                                                | 10,853                                                    | 36.5%                                                                 | 4                                                     | 9,905                                                     | 1,582       | 11,487  |
| 4                                                | 6,599                                                     | 37.7%                                                                 | 5                                                     | 5,619                                                     | 2,371       | 8,530   |
| 5                                                | 4,658                                                     | 32.0%                                                                 | 6                                                     | 4,027                                                     | 1,954       | 5,981   |
| 6                                                | 3,048                                                     | 34.7%                                                                 | 7                                                     | 2,491                                                     | 1,320       | 3,811   |
| 7                                                | 2,173                                                     | 37.4%                                                                 | 8                                                     | 1,604                                                     | 934         | 2,538   |
| 8                                                | 1,358                                                     | 36.2%                                                                 | 9                                                     | 1,008                                                     | 772         | 1,780   |
| 9                                                | 1,000                                                     | 28.0%                                                                 | 10                                                    | 651                                                       | 546         | 1,197   |
| 10                                               | 681                                                       | 22.0%                                                                 | 11                                                    | 442                                                       | 489         | 931     |
| 11                                               | 505                                                       | 17.4%                                                                 | 12                                                    | 317                                                       | 348         | 665     |
| 12                                               | 368                                                       | 20.1%                                                                 | 13                                                    | 241                                                       | 191         | 432     |
| 13                                               | 225                                                       | 12.9%                                                                 | 14                                                    | 193                                                       | 130         | 323     |
| 14                                               | 189                                                       | 13.8%                                                                 | 15                                                    | 133                                                       | 104         | 237     |
| 15                                               | 154                                                       | 18.2%                                                                 | 16                                                    | 96                                                        | 67          | 163     |
| 16                                               | 83                                                        | 27.7%                                                                 | 17                                                    | 58                                                        | 40          | 98      |
| 17                                               | 37                                                        | 83.8%                                                                 | 18                                                    | 5                                                         | 7           | 12      |
| 18                                               | 4                                                         | 100%                                                                  | 19                                                    | 5                                                         | 2           | 7       |
| 19                                               | 2                                                         | 100%                                                                  | 20                                                    | 1                                                         | 1           | 2       |
| 20                                               | 0                                                         | —                                                                     | 21                                                    | 0                                                         | 1           | 1       |

# How to Use Survey and Harvest Data

## Bonus Points by Species

**TURKEY** (Accrue bonus points through both the spring and fall draws; Section A does NOT reflect individuals who purchased a bonus point)

| A                                                |                                                           |                                                                       | B                                                     |                                                           |             |         |
|--------------------------------------------------|-----------------------------------------------------------|-----------------------------------------------------------------------|-------------------------------------------------------|-----------------------------------------------------------|-------------|---------|
| RESULTS OF THE 2008 FALL DRAW                    |                                                           |                                                                       | GOING INTO 2009 FALL DRAW                             |                                                           |             |         |
| Group Bonus Points going into the 2008 Fall Draw | No. Hunters per Bonus Point going into the 2008 Fall Draw | Percent Drawn during the 2008 Fall Draw within a Bonus Point grouping | Individual Bonus Points going into the 2009 Fall Draw | No. Hunters per Bonus Point going into the 2009 Fall Draw |             |         |
|                                                  |                                                           |                                                                       |                                                       | Resident                                                  | Nonresident | Total   |
| 0                                                | 1,699                                                     | 49.6%                                                                 | 1                                                     | 99,493                                                    | 3,857       | 103,350 |
| 1                                                | 3,104                                                     | 71.4%                                                                 | 2                                                     | 10,214                                                    | 199         | 10,413  |
| 2                                                | 2,117                                                     | 79.2%                                                                 | 3                                                     | 2,462                                                     | 91          | 2,553   |
| 3                                                | 791                                                       | 97.9%                                                                 | 4                                                     | 600                                                       | 25          | 625     |
| 4                                                | 98                                                        | 100%                                                                  | 5                                                     | 125                                                       | 13          | 138     |
| 5                                                | 12                                                        | 100%                                                                  | 6                                                     | 42                                                        | 7           | 49      |
|                                                  |                                                           |                                                                       | 7                                                     | 28                                                        | 5           | 33      |
|                                                  |                                                           |                                                                       | 8                                                     | 30                                                        | 7           | 37      |

**JAVELINA** (Accrue bonus points through both the spring and fall draws; Section A does NOT reflect individuals who purchased a bonus point)

| A                                                |                                                           |                                                                       | B                                                     |                                                           |             |         |
|--------------------------------------------------|-----------------------------------------------------------|-----------------------------------------------------------------------|-------------------------------------------------------|-----------------------------------------------------------|-------------|---------|
| RESULTS OF THE 2008 FALL DRAW                    |                                                           |                                                                       | GOING INTO 2009 FALL DRAW                             |                                                           |             |         |
| Group Bonus Points going into the 2008 Fall Draw | No. Hunters per Bonus Point going into the 2008 Fall Draw | Percent Drawn during the 2008 Fall Draw within a Bonus Point grouping | Individual Bonus Points going into the 2009 Fall Draw | No. Hunters per Bonus Point going into the 2009 Fall Draw |             |         |
|                                                  | (Juniors-only hunts)                                      |                                                                       |                                                       | Resident                                                  | Nonresident | Total   |
| 0                                                | 159                                                       | 92.5%                                                                 | 1                                                     | 99,564                                                    | 4,514       | 104,078 |
| 1                                                | 378                                                       | 96.8%                                                                 | 2                                                     | 6,480                                                     | 321         | 6,801   |
| 2                                                | 69                                                        | 92.8%                                                                 | 3                                                     | 192                                                       | 89          | 281     |
| 3                                                | 5                                                         | 100%                                                                  | 4                                                     | 34                                                        | 31          | 65      |
|                                                  |                                                           |                                                                       | 5                                                     | 5                                                         | 9           | 14      |
|                                                  |                                                           |                                                                       | 6                                                     | 7                                                         | 3           | 10      |
|                                                  |                                                           |                                                                       | 7                                                     | 8                                                         | 3           | 11      |
|                                                  |                                                           |                                                                       | 8                                                     | 4                                                         | 1           | 5       |

**BIGHORN** (Section A does NOT reflect individuals who purchased a bonus point)

| A                                                |                                                           |                                                                       | B                                                     |                                                           |             |        |
|--------------------------------------------------|-----------------------------------------------------------|-----------------------------------------------------------------------|-------------------------------------------------------|-----------------------------------------------------------|-------------|--------|
| RESULTS OF THE 2008 FALL DRAW                    |                                                           |                                                                       | GOING INTO 2009 FALL DRAW                             |                                                           |             |        |
| Group Bonus Points going into the 2008 Fall Draw | No. Hunters per Bonus Point going into the 2008 Fall Draw | Percent Drawn during the 2008 Fall Draw within a Bonus Point grouping | Individual Bonus Points going into the 2009 Fall Draw | No. Hunters per Bonus Point going into the 2009 Fall Draw |             |        |
|                                                  |                                                           |                                                                       |                                                       | Resident                                                  | Nonresident | Total  |
| 0                                                | 537                                                       | 5.96%                                                                 | 1                                                     | 91,417                                                    | 5,140       | 96,557 |
| 1                                                | 594                                                       | 6.59%                                                                 | 2                                                     | 3,461                                                     | 1,630       | 5,091  |
| 2                                                | 637                                                       | 7.06%                                                                 | 3                                                     | 2,179                                                     | 1,330       | 3,509  |
| 3                                                | 588                                                       | 6.52%                                                                 | 4                                                     | 1,600                                                     | 600         | 2,200  |
| 4                                                | 374                                                       | 4.15%                                                                 | 5                                                     | 1,035                                                     | 784         | 1,819  |
| 5                                                | 510                                                       | 5.66%                                                                 | 6                                                     | 1,002                                                     | 688         | 1,690  |
| 6                                                | 606                                                       | 6.72%                                                                 | 7                                                     | 944                                                       | 568         | 1,512  |
| 7                                                | 657                                                       | 7.29%                                                                 | 8                                                     | 808                                                       | 507         | 1,315  |
| 8                                                | 622                                                       | 6.90%                                                                 | 9                                                     | 782                                                       | 349         | 1,131  |
| 9                                                | 488                                                       | 5.41%                                                                 | 10                                                    | 569                                                       | 293         | 862    |
| 10                                               | 405                                                       | 4.49%                                                                 | 11                                                    | 449                                                       | 240         | 689    |
| 11                                               | 410                                                       | 4.55%                                                                 | 12                                                    | 426                                                       | 240         | 666    |
| 12                                               | 366                                                       | 4.06%                                                                 | 13                                                    | 391                                                       | 187         | 578    |
| 13                                               | 363                                                       | 4.03%                                                                 | 14                                                    | 387                                                       | 170         | 557    |
| 14                                               | 357                                                       | 3.96%                                                                 | 15                                                    | 351                                                       | 139         | 490    |
| 15                                               | 334                                                       | 3.70%                                                                 | 16                                                    | 314                                                       | 127         | 441    |
| 16                                               | 286                                                       | 3.17%                                                                 | 17                                                    | 271                                                       | 96          | 367    |
| 17                                               | 259                                                       | 2.87%                                                                 | 18                                                    | 267                                                       | 68          | 335    |
| 18                                               | 308                                                       | 3.42%                                                                 | 19                                                    | 294                                                       | 39          | 333    |
| 19                                               | 316                                                       | 3.50%                                                                 | 20                                                    | 304                                                       | 13          | 317    |



# How to Use Survey and Harvest Data

## Bonus Points by Species

**BUFFALO** (Accrue bonus points through both the spring and fall draws; Section A does NOT reflect individuals who purchased a bonus point)

| A                                                |                                                           |                                                                       | B                                                     |                                                           |             |        |
|--------------------------------------------------|-----------------------------------------------------------|-----------------------------------------------------------------------|-------------------------------------------------------|-----------------------------------------------------------|-------------|--------|
| RESULTS OF THE 2008 FALL DRAW                    |                                                           |                                                                       | GOING INTO 2009 FALL DRAW                             |                                                           |             |        |
| Group Bonus Points going into the 2008 Fall Draw | No. Hunters per Bonus Point going into the 2008 Fall Draw | Percent Drawn during the 2008 Fall Draw within a Bonus Point grouping | Individual Bonus Points going into the 2009 Fall Draw | No. Hunters per Bonus Point going into the 2009 Fall Draw |             |        |
|                                                  |                                                           |                                                                       |                                                       | Resident                                                  | Nonresident | Total  |
| 0                                                | 16                                                        | 0%                                                                    | 1                                                     | 95,971                                                    | 3,851       | 99,822 |
| 1                                                | 28                                                        | 0%                                                                    | 2                                                     | 2,074                                                     | 321         | 2,395  |
| 2                                                | 23                                                        | 0%                                                                    | 3                                                     | 1,245                                                     | 199         | 1,444  |
| 3                                                | 32                                                        | 0%                                                                    | 4                                                     | 845                                                       | 113         | 958    |
| 4                                                | 20                                                        | 5.0%                                                                  | 5                                                     | 549                                                       | 76          | 625    |
| 5                                                | 21                                                        | 0%                                                                    | 6                                                     | 415                                                       | 42          | 457    |
| 6                                                | 25                                                        | 0%                                                                    | 7                                                     | 339                                                       | 23          | 362    |
| 7                                                | 23                                                        | 0%                                                                    | 8                                                     | 268                                                       | 24          | 292    |
| 8                                                | 32                                                        | 0%                                                                    | 9                                                     | 259                                                       | 9           | 268    |
| 9                                                | 19                                                        | 5.3%                                                                  | 10                                                    | 153                                                       | 5           | 158    |
| 10                                               | 28                                                        | 3.6%                                                                  | 11                                                    | 149                                                       | 2           | 151    |
| 11                                               | 24                                                        | 0%                                                                    | 12                                                    | 150                                                       | 1           | 151    |
| 12                                               | 22                                                        | 0%                                                                    | 13                                                    | 103                                                       | 4           | 107    |
| 13                                               | 20                                                        | 5.0%                                                                  | 14                                                    | 88                                                        | 2           | 90     |
| 14                                               | 22                                                        | 4.6%                                                                  | 15                                                    | 80                                                        | 3           | 83     |
| 15                                               | 13                                                        | 0%                                                                    | 16                                                    | 58                                                        | 0           | 58     |
| 16                                               | 12                                                        | 0%                                                                    | 17                                                    | 50                                                        | 0           | 50     |
| 17                                               | 4                                                         | 0%                                                                    | 18                                                    | 33                                                        | 0           | 33     |
| 18                                               | 4                                                         | 0%                                                                    | 19                                                    | 21                                                        | 0           | 21     |
| 19                                               | 3                                                         | 0%                                                                    | 20                                                    | 16                                                        | 0           | 16     |
| 20                                               | 4                                                         | 0%                                                                    | 21                                                    | 12                                                        | 1           | 13     |
| 21                                               | 1                                                         | 0%                                                                    | 22                                                    | 16                                                        | 0           | 16     |
| 22                                               | 1                                                         | 0%                                                                    | 23                                                    | 6                                                         | 0           | 6      |
| 23                                               | 0                                                         | —                                                                     | 24                                                    | 10                                                        | 0           | 10     |
| 24                                               | 2                                                         | 50.0%                                                                 | 25                                                    | 7                                                         | 0           | 7      |
| 25                                               | 0                                                         | —                                                                     | 26                                                    | 1                                                         | 1           | 2      |
| 26                                               | 0                                                         | —                                                                     | 27                                                    | 2                                                         | 0           | 2      |
|                                                  |                                                           |                                                                       | 28                                                    | 2                                                         | 0           | 2      |
|                                                  |                                                           |                                                                       | 29                                                    | 2                                                         | 0           | 2      |
|                                                  |                                                           |                                                                       | 30                                                    | 0                                                         | 0           | 0      |
|                                                  |                                                           |                                                                       | 31                                                    | 1                                                         | 0           | 1      |

**BEAR** (Spring draw only)

| A                                                  |                                                             |                                                                         | B                                                       |                                                             |             |         |
|----------------------------------------------------|-------------------------------------------------------------|-------------------------------------------------------------------------|---------------------------------------------------------|-------------------------------------------------------------|-------------|---------|
| RESULTS OF THE 2009 FALL DRAW                      |                                                             |                                                                         | GOING INTO 2010 FALL DRAW                               |                                                             |             |         |
| Group Bonus Points going into the 2009 Spring Draw | No. Hunters per Bonus Point going into the 2009 Spring Draw | Percent Drawn during the 2009 Spring Draw within a Bonus Point grouping | Individual Bonus Points going into the 2010 Spring Draw | No. Hunters per Bonus Point going into the 2010 Spring Draw |             |         |
|                                                    | (Spring)                                                    |                                                                         |                                                         | Resident                                                    | Nonresident | Total   |
| 0                                                  | 47                                                          | 61.7%                                                                   | 1                                                       | 99,607                                                      | 3,707       | 103,314 |
| 1                                                  | 145                                                         | 68.3%                                                                   | 2                                                       | 772                                                         | 8           | 780     |
| 2                                                  | 83                                                          | 62.6%                                                                   | 3                                                       | 129                                                         | 6           | 135     |
| 3                                                  | 28                                                          | 50.0%                                                                   | 4                                                       | 46                                                          | 1           | 47      |
| 4                                                  | 5                                                           | 100%                                                                    | 5                                                       | 11                                                          | 0           | 11      |

---

# Deer

---

*Two species of deer occur in Arizona, the mule deer (Odocoileus hemionus) and the white-tailed deer (Odocoileus virginianus).*

## Mule Deer

### *Natural History*

Mule deer are the most abundant big-game animal in Arizona, with the statewide population estimated at 120,000 post-hunt adults. They can be found in most areas of the state, from sparsely vegetated deserts upward into high, forested mountains. Rocky Mountain mule deer occur primarily in northern Arizona above the Mogollon Rim in game management units 1 through 13, while the so-called desert mule deer is found in all of the more southern units (15 through 46).

The mule deer gets its name from its large ears. Its coat is reddish-brown in summer, turning to a blue-gray or a chocolate brown in winter. The forehead is much darker than the face, while the animal's throat, belly, and inner leg surfaces are white. One of the mule deer's most distinguishing characteristics is a white rump patch and a narrow, black-tipped white tail.

The mule deer is the larger of Arizona's deer species. Adult bucks may weigh more than 200 pounds and stand up to 42 inches tall at the shoulder. Does average about 125 pounds.

Mule deer antlers typically branch into two main beams, each of which may fork into

two or more tines. The size and number of points is dependent on a combination of the buck's age, nutrition, and genetic background. The antlers develop under a layer of soft skin, called velvet, which supplies them with nutrients. When fully grown, the antlers harden and the now dry velvet is rubbed off. The bony antlers are retained until spring, after the breeding season has passed. Buck deer are polygamous and use their antlers to intimidate other males and drive them away from the does during the winter breeding season.

After a gestation period of about 190 days, the does give birth to one or two spotted fawns. Fawns in northern Ari-

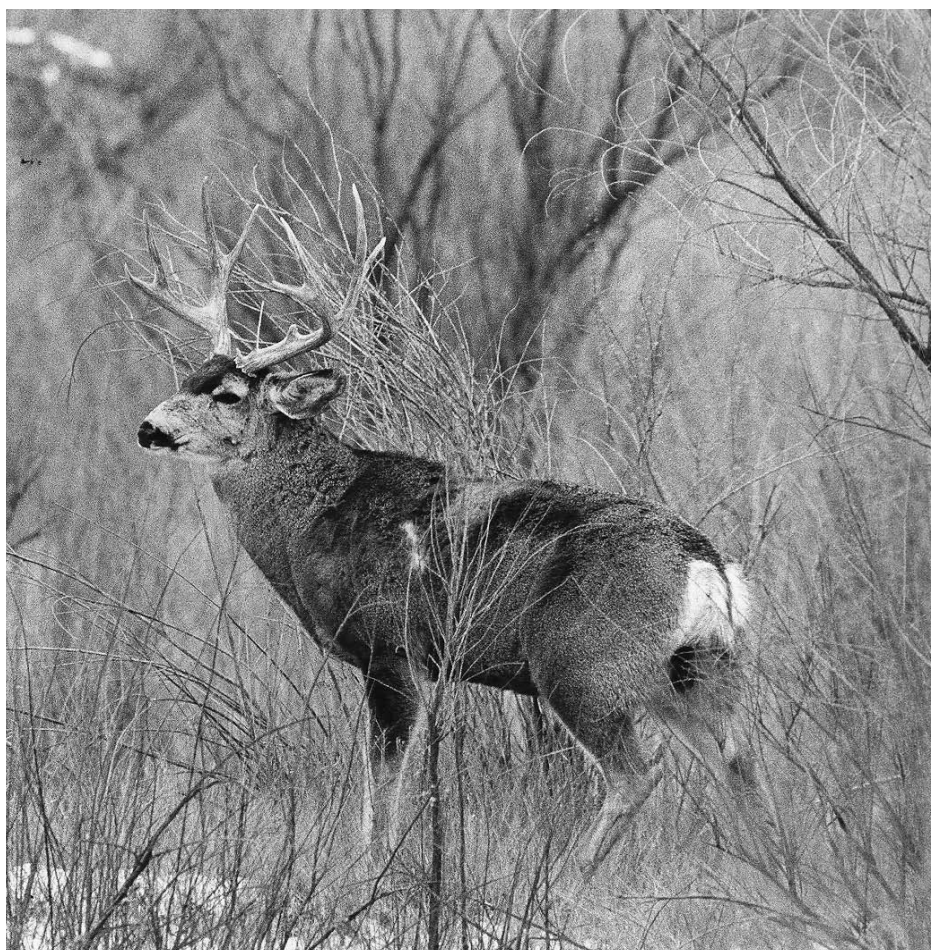

BOB MILES

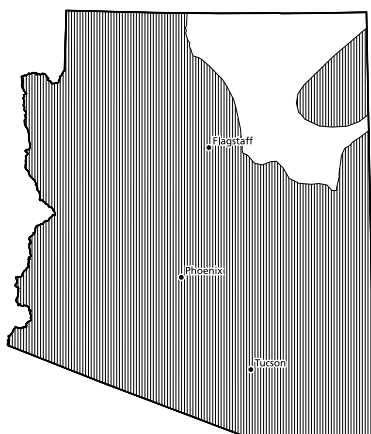

### Mule deer distribution

Research has shown that mule deer population levels are largely determined by the number of fawns that survive to be yearlings. Fawn survival, in turn, is largely determined by climatic events, with wet, mild winters contributing to high fawn survival rates. Dry winters and springs usually result in poor fawn survival, and heavy snows and freezing temperatures occasionally reduce the population levels of both fawn and adult Rocky Mountain mule deer. Another limiting factor for mule deer is predation. In Arizona, the mountain lion is the principal mule deer predator.

Mule deer are primarily browsers, although they feed largely on forbs and new grass growth in the spring and summer. Other major diet items are twigs, bark, buds, leaves, and nuts. Important browse plants include mountain mahogany, cliff rose, sagebrush, and oak in northern Arizona, with jojoba, buck brush, and mountain mahogany being favored in southern Arizona. Most feeding is done at dawn and dusk, although human activity and a full moon may cause a shift to more feeding at night.

### Hunt History

As befits Arizona's principal game animal, deer received some protection as early as 1887 when a four-month season of October 1 through January 31 was established by the territorial legislature. Buck-only hunting was instituted in 1893, and the season was gradually reduced until 1913 when the new state legislature authorized a two-month season and a two-buck bag limit. Even this was deemed excessive by the state's sportsmen, and a public initiative in 1916 reduced the limit to one buck deer to be taken during the month of October.

Despite a serious overpopulation of deer on the North Kaibab in the 1920s, deer numbers appeared to decline in the rest of the state. In 1929, the mule deer season was closed south of the Gila River, and even as recently as 1946, fewer than 5,000 mule deer (more

than 80 percent of all deer killed) were harvested in Arizona. Then, for reasons that are still unclear, deer populations began to increase. As the populations rose, doe and "any-deer" hunts were authorized. In 1961, an all-time high of 91,120 deer hunters took 35,897 deer. More than 86 percent of these were mule deer and nearly 10,000 were antlerless animals. Archery deer hunting was also now beginning to provide a significant hunting opportunity.

A series of years of poor fawn survival followed. By 1970 fewer than 16,000 deer were taken, and hunt success had fallen to 16 percent. With the institution of permit-only deer hunting the following year, hunter numbers dropped from more than 97,000 to fewer than 68,000. Only about 9,500 mule deer were reported harvested.

Deer permit numbers gradually increased after 1972, leveling off at around 70,000 per year between 1976 and 1982, when hunters took more than 12,000 mule deer, approximately 75 percent of the total deer harvest. Then, a series of wet winters resulted in an increase in fawn survival rates, and hunter numbers and the numbers of deer bagged increased accordingly until 1986, when nearly 86,000 hunters took 25,566 deer, of which 77 percent were mule deer.

Since then, another series of droughts has occurred, and deer hunting opportunity is again being curtailed. In 1998, 44,524 hunters reported taking fewer than 10,500 deer. Of the total deer harvested that year only 60 percent were mule deer. Prospects in the near future are even more discouraging, but mule deer are "boom and bust" animals. With the advent of better than average winter rains, mule deer populations will once again improve. The only question is when.

## White-tailed Deer

### Natural History

Arizona's other deer is a small subspecies of the white-tailed deer. These Coues (pronounced Cows) deer are most common in the state's southeastern mountains, but range northward to the edge of the Mogollon Rim, up into the White Mountains, and as far west as Sycamore Canyon in Unit 8. The statewide population is estimated at 82,000 post-hunt adults. Coues whitetails require areas of predictable summer precipitation and are most common in oak woodlands and on chaparral covered hillsides with oaks and pines. This species, while more resilient than mule deer to hunt pressure, is less tolerant of droughts and appears to be more affected by livestock grazing.

In contrast to the mule deer's branching antlers, the tines or points of a whitetail's antlers originate from a forward-curving main beam. Mature bucks generally have three to four tines per side. The coat color is grayish-brown salt-and-pepper with white underparts; the face is marked with white halos around the eyes and a

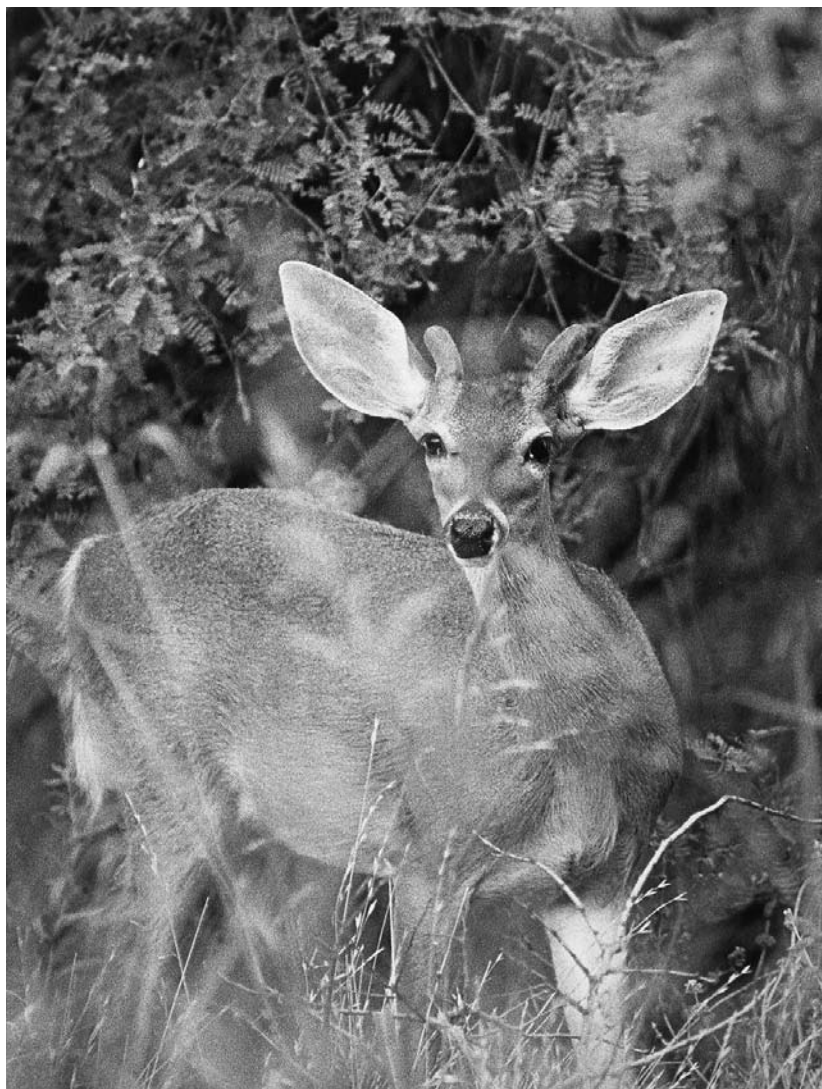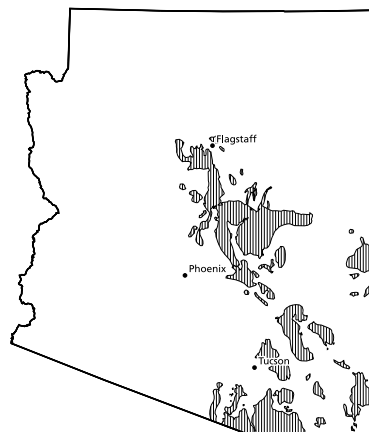

**White-tailed deer distribution**

and seeing two generations running together is not uncommon. Unlike mule deer, white-tailed deer rarely form herds, and most observations are of fewer than six animals.

When seen at a distance, white-tailed deer can often be distinguished from mule deer by their cautious, running gait and flagging white tail. Whitetails never use the stiff legged, bounding gait sometimes employed by mule deer. Habitat preferences also differ. In Arizona's southern mountain ranges, whitetails are generally found at higher elevations and in rougher country than are mule deer.

white band across the muzzle. The most distinguishing characteristic of the whitetail, however, is a long, fluffy tail that is all white on the underside, gray to reddish-black on top, and often lifted upward as an alarm signal.

The Coues deer is much smaller than most of its eastern cousins. Bucks stand just over 30 inches at the shoulder and rarely weigh more than 100 pounds. Does average 65 pounds. The rutting season usually runs from December through February, and the fawn drop coincides with the new growth of forbs that results from the summer rains.

A doe's first pregnancy usually results in a single fawn; thereafter she may bear twins. White-tailed deer fawns may stay with their mothers for more than a year,

## *Hunt History*

The Coues white-tailed deer is perhaps Arizona's finest game animal. Wary, and expert at using cover, whitetails rarely offer the hunter a standing shot once jumped. Perhaps for this reason, the species has become increasingly important in the harvest. Although the statewide take has varied from 1,500 to more than 7,000 whitetails a year, depending on the vagaries of drought and fawn survival, the recent trend has been for this species to constitute an ever greater proportion of the statewide harvest. For example, whitetails comprised less than 15 percent of Arizona's deer harvest in 1961 but nearly 40 percent in 1998.

# Deer Survey Data

## *Historic Summary of Mule Deer Survey Data*

| Year | Bucks | Does  | Fawns | Unclassified | Total | Bucks/100 Does | Fawns/100 Does |
|------|-------|-------|-------|--------------|-------|----------------|----------------|
| 1948 | 95    | 293   | 143   | 77           | 608   | 32             | 49             |
| 1949 | 149   | 387   | 189   | 73           | 798   | 39             | 49             |
| 1950 | 373   | 1326  | 690   | 103          | 2492  | 28             | 52             |
| 1951 | 432   | 1553  | 887   | 424          | 3296  | 28             | 57             |
| 1952 | 804   | 2398  | 1551  | 747          | 5500  | 34             | 65             |
| 1953 | 636   | 2101  | 1512  | 559          | 4808  | 30             | 72             |
| 1954 | 616   | 2373  | 1020  | 553          | 4562  | 26             | 43             |
| 1955 | 1052  | 2276  | 841   | 594          | 4763  | 46             | 37             |
| 1956 | 352   | 1184  | 539   | 279          | 2354  | 30             | 46             |
| 1957 | 735   | 2079  | 886   | 540          | 4240  | 35             | 43             |
| 1958 | 552   | 1810  | 1057  | 350          | 3769  | 31             | 58             |
| 1959 | 1049  | 2748  | 1388  | 698          | 5883  | 38             | 51             |
| 1960 | 1125  | 2890  | 1179  | 409          | 5603  | 39             | 41             |
| 1961 | 1162  | 2806  | 1212  | 522          | 5702  | 41             | 43             |
| 1962 | 1213  | 3072  | 1205  | 478          | 5968  | 39             | 39             |
| 1963 | 1185  | 3186  | 1189  | 350          | 5910  | 37             | 37             |
| 1964 | 1118  | 3269  | 1467  | 353          | 6207  | 34             | 45             |
| 1965 | 1260  | 3460  | 1775  | 377          | 6872  | 36             | 51             |
| 1966 | 1299  | 4370  | 2240  | 486          | 8395  | 30             | 51             |
| 1967 | 1341  | 4715  | 2462  | 320          | 8838  | 28             | 52             |
| 1968 | 1029  | 3708  | 1620  | 324          | 6681  | 28             | 44             |
| 1969 | 1173  | 4494  | 2324  | 392          | 8383  | 26             | 52             |
| 1970 | 1306  | 5218  | 2669  | 383          | 9576  | 25             | 51             |
| 1971 | 1551  | 6018  | 2649  | 597          | 10815 | 26             | 44             |
| 1972 | 1262  | 4385  | 2093  | 346          | 8086  | 29             | 48             |
| 1973 | 1089  | 4363  | 2514  | 286          | 8252  | 25             | 58             |
| 1974 | 1009  | 4184  | 1999  | 319          | 7511  | 24             | 48             |
| 1975 | 1126  | 4275  | 1911  | 439          | 7751  | 26             | 45             |
| 1976 | 1029  | 4320  | 1820  | 263          | 7432  | 24             | 42             |
| 1977 | 1022  | 4402  | 1696  | 467          | 7587  | 23             | 39             |
| 1978 | 1329  | 5719  | 2573  | 472          | 10093 | 23             | 45             |
| 1979 | 1119  | 4824  | 2249  | 288          | 8480  | 23             | 47             |
| 1980 | 1255  | 5815  | 2428  | 311          | 9809  | 22             | 42             |
| 1981 | 1367  | 6315  | 2694  | 254          | 10630 | 22             | 43             |
| 1982 | 1299  | 5992  | 3033  | 249          | 10573 | 22             | 51             |
| 1983 | 1360  | 6540  | 3361  | 361          | 11622 | 21             | 51             |
| 1984 | 1401  | 6259  | 3411  | 407          | 11478 | 22             | 55             |
| 1985 | 2102  | 9093  | 4312  | 345          | 15852 | 23             | 47             |
| 1986 | 2148  | 10521 | 4989  | 210          | 17868 | 20             | 47             |
| 1987 | 2227  | 10193 | 4139  | 175          | 16734 | 22             | 41             |
| 1988 | 2157  | 11383 | 4577  | 145          | 18262 | 19             | 40             |
| 1989 | 1976  | 10272 | 3465  | 214          | 15927 | 19             | 34             |
| 1990 | 1778  | 10361 | 4024  | 203          | 16366 | 17             | 39             |
| 1991 | 1798  | 10532 | 4444  | 220          | 16994 | 17             | 42             |
| 1992 | 1689  | 9500  | 4332  | 100          | 15621 | 18             | 46             |
| 1993 | 1910  | 10177 | 4190  | 167          | 16444 | 19             | 41             |
| 1994 | 2103  | 11504 | 3833  | 159          | 17599 | 18             | 33             |
| 1995 | 1820  | 11082 | 3668  | 265          | 16835 | 16             | 33             |
| 1996 | 1590  | 9954  | 3001  | 124          | 14669 | 16             | 30             |
| 1997 | 1351  | 8756  | 3168  | 100          | 13375 | 15             | 36             |
| 1998 | 1404  | 8041  | 3919  | 53           | 13417 | 17             | 49             |
| 1999 | 1705  | 8559  | 3786  | 44           | 14094 | 20             | 44             |
| 2000 | 1732  | 8416  | 2794  | 80           | 13022 | 21             | 33             |
| 2001 | 1502  | 7408  | 3051  | 45           | 12006 | 20             | 41             |
| 2002 | 1321  | 7069  | 1838  | 142          | 10370 | 19             | 26             |
| 2003 | 1268  | 6190  | 2524  | 36           | 10018 | 20             | 41             |
| 2004 | 1134  | 5148  | 2309  | 59           | 8650  | 22             | 45             |
| 2005 | 1054  | 4738  | 2333  | 69           | 8194  | 22             | 49             |
| 2006 | 1146  | 5143  | 2150  | 89           | 8528  | 22             | 42             |
| 2007 | 1180  | 4931  | 2071  | 59           | 8241  | 24             | 42             |
| 2008 | 1132  | 4164  | 1965  | 106          | 7367  | 27             | 47             |

# Deer Survey Data

## *Historic Summary of White-tailed Deer Survey Data*

| Year | Bucks | Does | Fawns | Unclassified | Total | Bucks/100 Does | Fawns/100 Does |
|------|-------|------|-------|--------------|-------|----------------|----------------|
| 1946 | 35    | 53   | 28    | 18           | 134   | 66             | 53             |
| 1947 | 58    | 72   | 11    | 26           | 167   | 81             | 15             |
| 1948 | 32    | 96   | 61    | 54           | 243   | 33             | 64             |
| 1949 | 49    | 95   | 37    | 67           | 248   | 52             | 39             |
| 1950 | 136   | 223  | 109   | 108          | 576   | 61             | 49             |
| 1951 | 25    | 68   | 22    | 23           | 138   | 37             | 32             |
| 1952 | 145   | 272  | 139   | 146          | 702   | 53             | 51             |
| 1953 | 151   | 336  | 387   | 181          | 1055  | 45             | 115            |
| 1954 | 367   | 828  | 309   | 204          | 1708  | 44             | 37             |
| 1955 | 227   | 497  | 217   | 120          | 1061  | 46             | 44             |
| 1956 | 247   | 533  | 167   | 219          | 1166  | 46             | 31             |
| 1957 | 266   | 455  | 147   | 170          | 1038  | 58             | 32             |
| 1958 | 221   | 420  | 148   | 88           | 877   | 53             | 35             |
| 1959 | 177   | 453  | 137   | 93           | 860   | 39             | 30             |
| 1960 | 159   | 440  | 164   | 124          | 887   | 36             | 37             |
| 1961 | 266   | 484  | 174   | 113          | 1037  | 55             | 36             |
| 1962 | 263   | 586  | 193   | 135          | 1177  | 45             | 33             |
| 1963 | 291   | 630  | 212   | 152          | 1285  | 46             | 34             |
| 1964 | 291   | 581  | 243   | 143          | 1258  | 50             | 42             |
| 1965 | 211   | 502  | 224   | 124          | 1061  | 42             | 45             |
| 1966 | 222   | 484  | 222   | 100          | 1028  | 46             | 46             |
| 1967 | 164   | 391  | 164   | 80           | 799   | 42             | 42             |
| 1968 | 152   | 382  | 144   | 105          | 783   | 40             | 38             |
| 1969 | 131   | 350  | 152   | 71           | 704   | 37             | 43             |
| 1970 | 149   | 373  | 138   | 49           | 709   | 40             | 37             |
| 1971 | 170   | 398  | 150   | 94           | 812   | 43             | 38             |
| 1972 | 145   | 312  | 133   | 70           | 660   | 46             | 43             |
| 1973 | 113   | 316  | 149   | 54           | 632   | 36             | 47             |
| 1974 | 101   | 244  | 95    | 54           | 494   | 41             | 39             |
| 1975 | 147   | 448  | 195   | 65           | 855   | 33             | 44             |
| 1976 | 171   | 577  | 183   | 73           | 1004  | 30             | 32             |
| 1977 | 165   | 577  | 178   | 76           | 996   | 29             | 31             |
| 1978 | 202   | 644  | 336   | 84           | 1266  | 31             | 52             |
| 1979 | 226   | 752  | 312   | 54           | 1344  | 30             | 41             |
| 1980 | 306   | 766  | 267   | 62           | 1401  | 40             | 35             |
| 1981 | 329   | 1069 | 404   | 48           | 1850  | 31             | 38             |
| 1982 | 315   | 1020 | 471   | 59           | 1865  | 31             | 46             |
| 1983 | 296   | 978  | 528   | 50           | 1852  | 30             | 54             |
| 1984 | 283   | 1016 | 538   | 56           | 1893  | 28             | 53             |
| 1985 | 424   | 1388 | 690   | 42           | 2544  | 31             | 50             |
| 1986 | 439   | 1403 | 544   | 112          | 2498  | 31             | 39             |
| 1987 | 444   | 1648 | 493   | 34           | 2619  | 27             | 30             |
| 1988 | 425   | 1584 | 551   | 29           | 2589  | 27             | 35             |
| 1989 | 461   | 1749 | 567   | 87           | 2864  | 26             | 32             |
| 1990 | 568   | 1970 | 742   | 53           | 3333  | 29             | 38             |
| 1991 | 483   | 1814 | 671   | 107          | 3075  | 27             | 37             |
| 1992 | 466   | 1859 | 634   | 58           | 3017  | 25             | 34             |
| 1993 | 479   | 1764 | 528   | 62           | 2833  | 27             | 30             |
| 1994 | 541   | 2000 | 518   | 192          | 3251  | 27             | 26             |
| 1995 | 538   | 2227 | 588   | 102          | 3455  | 24             | 26             |
| 1996 | 620   | 2697 | 729   | 91           | 4137  | 23             | 27             |
| 1997 | 484   | 2380 | 569   | 45           | 3478  | 20             | 24             |
| 1998 | 475   | 1967 | 679   | 52           | 3173  | 24             | 35             |
| 1999 | 422   | 1885 | 679   | 32           | 3018  | 22             | 36             |
| 2000 | 405   | 1734 | 499   | 57           | 2695  | 23             | 29             |
| 2001 | 451   | 1925 | 711   | 132          | 3219  | 23             | 37             |
| 2002 | 475   | 2023 | 558   | 44           | 3100  | 23             | 28             |
| 2003 | 550   | 2165 | 761   | 45           | 3521  | 25             | 35             |
| 2004 | 636   | 2423 | 777   | 45           | 3881  | 26             | 32             |
| 2005 | 544   | 2031 | 738   | 41           | 3354  | 27             | 36             |
| 2006 | 581   | 2055 | 738   | 38           | 3412  | 28             | 36             |
| 2007 | 684   | 2319 | 800   | 56           | 3859  | 30             | 35             |
| 2008 | 658   | 2164 | 799   | 33           | 3654  | 30             | 37             |



# Deer Survey Data

## 5-Year: 2004-2008 Deer Survey Data

| Unit             | Year | Bucks | Does | Fawns | Unclassified | Total | Bucks/100 Does | Fawns/100 Does |
|------------------|------|-------|------|-------|--------------|-------|----------------|----------------|
| <b>MULE DEER</b> |      |       |      |       |              |       |                |                |
| 1                | 2004 | 11    | 66   | 36    | 0            | 113   | 17             | 55             |
| 1                | 2005 | 11    | 91   | 32    | 1            | 135   | 12             | 35             |
| 1                | 2006 | 7     | 39   | 16    | 0            | 62    | 18             | 41             |
| 1                | 2007 | 8     | 35   | 20    | 1            | 64    | 23             | 57             |
| 1                | 2008 | 9     | 41   | 18    | 3            | 71    | 22             | 44             |
| 2                | 2005 | 7     | 43   | 25    | 0            | 75    | 16             | 58             |
| 2                | 2006 | 6     | 41   | 15    | 0            | 62    | 15             | 37             |
| 2                | 2007 | 5     | 44   | 15    | 0            | 64    | 11             | 34             |
| 2                | 2008 | 12    | 75   | 9     | 0            | 96    | 16             | 12             |
| 3A/3C            | 2004 | 5     | 38   | 15    | 0            | 58    | 13             | 39             |
| 3A/3C            | 2005 | 14    | 75   | 35    | 0            | 124   | 19             | 47             |
| 3A/3C            | 2006 | 14    | 38   | 18    | 0            | 70    | 37             | 47             |
| 3A/3C            | 2007 | 9     | 41   | 31    | 0            | 81    | 22             | 76             |
| 3A/3C            | 2008 | 16    | 44   | 18    | 0            | 78    | 36             | 41             |
| 3B               | 2004 | 16    | 56   | 1     | 0            | 73    | 29             | 2              |
| 3B               | 2005 | 8     | 10   | 6     | 0            | 24    | 80             | 60             |
| 3B               | 2006 | 12    | 38   | 6     | 0            | 56    | 32             | 16             |
| 3B               | 2007 | 15    | 43   | 18    | 0            | 76    | 35             | 42             |
| 3B               | 2008 | 17    | 37   | 16    | 0            | 70    | 46             | 43             |
| 4                | 2005 | 8     | 27   | 16    | 0            | 51    | 30             | 59             |
| 4                | 2006 | 15    | 34   | 10    | 0            | 59    | 44             | 29             |
| 4                | 2007 | 10    | 20   | 10    | 0            | 40    | 50             | 50             |
| 4                | 2008 | 8     | 19   | 8     | 0            | 35    | 42             | 42             |
| 5                | 2004 | 41    | 177  | 61    | 0            | 279   | 23             | 34             |
| 5                | 2005 | 26    | 74   | 39    | 0            | 139   | 35             | 53             |
| 5                | 2006 | 15    | 112  | 26    | 0            | 153   | 13             | 23             |
| 5                | 2007 | 14    | 103  | 37    | 0            | 154   | 14             | 36             |
| 5                | 2008 | 18    | 59   | 20    | 0            | 97    | 31             | 34             |
| 6A               | 2004 | 28    | 125  | 50    | 0            | 203   | 22             | 40             |
| 6A               | 2005 | 23    | 140  | 52    | 0            | 215   | 16             | 37             |
| 6A               | 2006 | 26    | 106  | 46    | 0            | 178   | 25             | 43             |
| 6A               | 2007 | 28    | 122  | 50    | 0            | 200   | 23             | 41             |
| 6A               | 2008 | 25    | 109  | 43    | 0            | 177   | 23             | 39             |
| 6B               | 2004 | 6     | 40   | 25    | 4            | 75    | 15             | 63             |
| 6B               | 2005 | 18    | 66   | 37    | 1            | 122   | 27             | 56             |
| 6B               | 2006 | 24    | 79   | 37    | 1            | 141   | 30             | 47             |
| 6B               | 2007 | 15    | 60   | 28    | 4            | 107   | 25             | 47             |
| 6B               | 2008 | 8     | 40   | 17    | 0            | 65    | 20             | 43             |
| 7                | 2004 | 17    | 102  | 53    | 1            | 173   | 17             | 52             |
| 7                | 2005 | 23    | 106  | 60    | 0            | 189   | 22             | 57             |
| 7                | 2006 | 17    | 77   | 34    | 1            | 129   | 22             | 44             |
| 7                | 2007 | 18    | 101  | 28    | 0            | 147   | 18             | 28             |
| 7                | 2008 | 30    | 105  | 47    | 0            | 182   | 29             | 45             |
| 8                | 2004 | 15    | 82   | 40    | 0            | 137   | 18             | 49             |
| 8                | 2005 | 16    | 117  | 53    | 1            | 187   | 14             | 45             |
| 8                | 2006 | 21    | 109  | 50    | 0            | 180   | 19             | 46             |
| 8                | 2007 | 16    | 99   | 29    | 0            | 144   | 16             | 29             |
| 8                | 2008 | 30    | 78   | 36    | 1            | 145   | 38             | 46             |
| 9                | 2004 | 18    | 130  | 51    | 0            | 199   | 14             | 39             |
| 9                | 2005 | 7     | 103  | 39    | 0            | 149   | 7              | 38             |
| 9                | 2006 | 34    | 206  | 72    | 0            | 312   | 17             | 35             |
| 9                | 2007 | 38    | 217  | 89    | 0            | 344   | 18             | 41             |
| 9                | 2008 | 8     | 45   | 26    | 0            | 79    | 18             | 58             |
| 10               | 2004 | 27    | 129  | 50    | 0            | 206   | 21             | 39             |
| 10               | 2005 | 22    | 107  | 72    | 0            | 201   | 21             | 67             |
| 10               | 2006 | 7     | 22   | 2     | 0            | 31    | 32             | 9              |
| 10               | 2007 | 13    | 41   | 12    | 0            | 66    | 32             | 29             |
| 10               | 2008 | 11    | 42   | 19    | 27           | 99    | 26             | 45             |
| 12AE             | 2004 | 4     | 36   | 28    | 0            | 68    | 11             | 78             |
| 12AE             | 2005 | 8     | 30   | 25    | 0            | 63    | 27             | 83             |
| 12AE             | 2006 | 46    | 172  | 118   | 2            | 338   | 27             | 69             |
| 12AE             | 2007 | 5     | 23   | 17    | 0            | 45    | 22             | 74             |
| 12AE             | 2008 | 44    | 197  | 142   | 0            | 383   | 22             | 72             |
| 12AW             | 2004 | 71    | 237  | 244   | 5            | 557   | 30             | 103            |

# Deer Survey Data

## 5-Year: 2004-2008 Deer Survey Data

| Unit                         | Year | Bucks | Does | Fawns | Unclassified | Total | Bucks/100 Does | Fawns/100 Does |
|------------------------------|------|-------|------|-------|--------------|-------|----------------|----------------|
| <b>MULE DEER (continued)</b> |      |       |      |       |              |       |                |                |
| 12AW                         | 2005 | 84    | 362  | 313   | 14           | 773   | 23             | 86             |
| 12AW                         | 2006 | 92    | 336  | 265   | 0            | 693   | 27             | 79             |
| 12AW                         | 2007 | 99    | 314  | 304   | 5            | 722   | 32             | 97             |
| 12AW                         | 2008 | 67    | 210  | 161   | 15           | 453   | 32             | 77             |
| 12B                          | 2004 | 78    | 253  | 173   | 0            | 504   | 31             | 68             |
| 12B                          | 2005 | 19    | 108  | 82    | 14           | 223   | 18             | 76             |
| 12B                          | 2006 | 62    | 183  | 133   | 5            | 383   | 34             | 73             |
| 12B                          | 2008 | 2     | 1    | 0     | 0            | 3     | 200            | 0              |
| 12BW                         | 2007 | 86    | 277  | 140   | 6            | 509   | 31             | 51             |
| 12BW                         | 2008 | 57    | 161  | 114   | 6            | 338   | 35             | 71             |
| 13A                          | 2004 | 25    | 63   | 47    | 5            | 140   | 40             | 75             |
| 13A                          | 2005 | 21    | 56   | 47    | 12           | 136   | 38             | 84             |
| 13A                          | 2006 | 46    | 107  | 65    | 12           | 230   | 43             | 61             |
| 13A                          | 2007 | 40    | 74   | 28    | 3            | 145   | 54             | 38             |
| 13A                          | 2008 | 25    | 50   | 21    | 1            | 97    | 50             | 42             |
| 13B                          | 2004 | 18    | 53   | 30    | 1            | 102   | 34             | 57             |
| 13B                          | 2005 | 35    | 54   | 39    | 0            | 128   | 65             | 72             |
| 13B                          | 2006 | 40    | 59   | 38    | 6            | 143   | 68             | 64             |
| 13B                          | 2007 | 48    | 61   | 25    | 18           | 152   | 79             | 41             |
| 13B                          | 2008 | 34    | 76   | 48    | 0            | 158   | 45             | 63             |
| 15A/15B                      | 2006 | 11    | 22   | 1     | 1            | 35    | 50             | 5              |
| 15A/15B                      | 2008 | 5     | 18   | 7     | 0            | 30    | 28             | 39             |
| 16A                          | 2004 | 17    | 41   | 21    | 0            | 79    | 41             | 51             |
| 16A                          | 2005 | 19    | 41   | 10    | 0            | 70    | 46             | 24             |
| 16A                          | 2006 | 9     | 27   | 7     | 0            | 43    | 33             | 26             |
| 16A                          | 2007 | 14    | 34   | 8     | 0            | 56    | 41             | 24             |
| 16A                          | 2008 | 12    | 37   | 15    | 0            | 64    | 32             | 41             |
| 17                           | 2004 | 30    | 86   | 44    | 3            | 163   | 35             | 51             |
| 17A                          | 2005 | 2     | 9    | 2     | 0            | 13    | 22             | 22             |
| 17A                          | 2006 | 8     | 30   | 9     | 0            | 47    | 27             | 30             |
| 17A                          | 2007 | 5     | 27   | 4     | 0            | 36    | 19             | 15             |
| 17A                          | 2008 | 15    | 51   | 14    | 0            | 80    | 29             | 27             |
| 17B                          | 2005 | 16    | 41   | 26    | 0            | 83    | 39             | 63             |
| 17B                          | 2006 | 6     | 69   | 26    | 0            | 101   | 9              | 38             |
| 17B                          | 2007 | 18    | 80   | 15    | 0            | 113   | 23             | 19             |
| 17B                          | 2008 | 17    | 51   | 19    | 0            | 87    | 33             | 37             |
| 18A                          | 2004 | 30    | 124  | 58    | 0            | 212   | 24             | 47             |
| 18A                          | 2005 | 32    | 71   | 55    | 0            | 158   | 45             | 77             |
| 18A                          | 2006 | 6     | 24   | 2     | 0            | 32    | 25             | 8              |
| 18A                          | 2007 | 12    | 62   | 16    | 0            | 90    | 19             | 26             |
| 18A                          | 2008 | 20    | 71   | 36    | 0            | 127   | 28             | 51             |
| 18B                          | 2004 | 19    | 86   | 43    | 0            | 148   | 22             | 50             |
| 18B                          | 2005 | 11    | 60   | 31    | 0            | 102   | 18             | 52             |
| 18B                          | 2006 | 28    | 161  | 42    | 13           | 244   | 17             | 26             |
| 18B                          | 2007 | 25    | 76   | 22    | 0            | 123   | 33             | 29             |
| 18B                          | 2008 | 22    | 41   | 23    | 9            | 95    | 54             | 56             |
| 19A                          | 2004 | 4     | 35   | 12    | 2            | 53    | 11             | 34             |
| 19A                          | 2005 | 18    | 65   | 43    | 0            | 126   | 28             | 66             |
| 19A                          | 2006 | 19    | 87   | 21    | 0            | 127   | 22             | 24             |
| 19A                          | 2007 | 9     | 49   | 17    | 1            | 76    | 18             | 35             |
| 19A                          | 2008 | 16    | 56   | 29    | 0            | 101   | 29             | 52             |
| 19B                          | 2004 | 30    | 88   | 24    | 0            | 142   | 34             | 27             |
| 19B                          | 2005 | 22    | 90   | 26    | 0            | 138   | 24             | 29             |
| 19B                          | 2006 | 19    | 54   | 9     | 13           | 95    | 35             | 17             |
| 19B                          | 2007 | 20    | 44   | 20    | 0            | 84    | 45             | 45             |
| 19B                          | 2008 | 18    | 43   | 19    | 2            | 82    | 42             | 44             |
| 20A                          | 2004 | 9     | 70   | 20    | 4            | 103   | 13             | 29             |
| 20A                          | 2005 | 9     | 39   | 14    | 0            | 62    | 23             | 36             |
| 20A                          | 2006 | 8     | 34   | 6     | 0            | 48    | 24             | 18             |
| 20A                          | 2007 | 16    | 47   | 14    | 0            | 77    | 34             | 30             |
| 20A                          | 2008 | 2     | 18   | 10    | 0            | 30    | 11             | 56             |
| 20B                          | 2004 | 17    | 43   | 15    | 0            | 75    | 40             | 35             |
| 20B                          | 2005 | 31    | 66   | 24    | 0            | 121   | 47             | 36             |
| 20B                          | 2006 | 34    | 85   | 28    | 0            | 147   | 40             | 33             |

# Deer Survey Data

## 5-Year: 2004-2008 Deer Survey Data

| Unit                         | Year | Bucks | Does | Fawns | Unclassified | Total | Bucks/100 Does | Fawns/100 Does |
|------------------------------|------|-------|------|-------|--------------|-------|----------------|----------------|
| <b>MULE DEER (continued)</b> |      |       |      |       |              |       |                |                |
| 20B                          | 2007 | 25    | 71   | 19    | 0            | 115   | 35             | 27             |
| 20B                          | 2008 | 19    | 36   | 15    | 1            | 71    | 53             | 42             |
| 20C                          | 2004 | 23    | 109  | 35    | 0            | 167   | 21             | 32             |
| 20C                          | 2005 | 30    | 63   | 36    | 1            | 130   | 48             | 57             |
| 20C                          | 2006 | 43    | 142  | 52    | 0            | 237   | 30             | 37             |
| 20C                          | 2007 | 23    | 75   | 28    | 0            | 126   | 31             | 37             |
| 20C                          | 2008 | 29    | 66   | 28    | 0            | 123   | 44             | 42             |
| 21                           | 2004 | 9     | 34   | 14    | 0            | 57    | 26             | 41             |
| 21                           | 2005 | 15    | 51   | 23    | 0            | 89    | 29             | 45             |
| 21                           | 2006 | 14    | 48   | 25    | 0            | 87    | 29             | 52             |
| 21                           | 2007 | 18    | 68   | 19    | 0            | 105   | 26             | 28             |
| 21                           | 2008 | 21    | 77   | 37    | 0            | 135   | 27             | 48             |
| 22                           | 2004 | 52    | 138  | 61    | 1            | 252   | 38             | 44             |
| 22                           | 2005 | 32    | 81   | 39    | 0            | 152   | 40             | 48             |
| 22                           | 2006 | 42    | 119  | 69    | 0            | 230   | 35             | 58             |
| 22                           | 2007 | 31    | 113  | 56    | 0            | 200   | 27             | 50             |
| 22                           | 2008 | 27    | 138  | 60    | 0            | 225   | 20             | 43             |
| 23                           | 2004 | 22    | 107  | 45    | 0            | 174   | 21             | 42             |
| 23                           | 2005 | 40    | 110  | 70    | 0            | 220   | 36             | 64             |
| 23                           | 2006 | 30    | 122  | 62    | 0            | 214   | 25             | 51             |
| 23                           | 2007 | 30    | 123  | 52    | 0            | 205   | 24             | 42             |
| 23                           | 2008 | 30    | 101  | 46    | 0            | 177   | 30             | 46             |
| 24A                          | 2004 | 25    | 121  | 48    | 2            | 196   | 21             | 40             |
| 24A                          | 2005 | 17    | 92   | 44    | 0            | 153   | 18             | 48             |
| 24A                          | 2006 | 7     | 53   | 17    | 5            | 82    | 13             | 32             |
| 24A                          | 2007 | 6     | 60   | 33    | 2            | 101   | 10             | 55             |
| 24A                          | 2008 | 22    | 60   | 42    | 0            | 124   | 37             | 70             |
| 24B                          | 2004 | 20    | 87   | 62    | 0            | 169   | 23             | 71             |
| 24B                          | 2005 | 17    | 113  | 37    | 0            | 167   | 15             | 33             |
| 24B                          | 2006 | 5     | 43   | 42    | 0            | 90    | 12             | 98             |
| 24B                          | 2007 | 24    | 90   | 47    | 0            | 161   | 27             | 52             |
| 24B                          | 2008 | 22    | 82   | 43    | 0            | 147   | 27             | 52             |
| 25M                          | 2006 | 1     | 8    | 2     | 0            | 11    | 13             | 25             |
| 26M                          | 2006 | 4     | 5    | 2     | 0            | 11    | 80             | 40             |
| 27                           | 2004 | 52    | 231  | 68    | 0            | 351   | 23             | 29             |
| 27                           | 2005 | 38    | 222  | 35    | 0            | 295   | 17             | 16             |
| 27                           | 2006 | 51    | 239  | 57    | 0            | 347   | 21             | 24             |
| 27                           | 2007 | 77    | 294  | 108   | 0            | 479   | 26             | 37             |
| 27                           | 2008 | 42    | 190  | 72    | 0            | 304   | 22             | 38             |
| 28                           | 2004 | 32    | 170  | 70    | 1            | 273   | 19             | 41             |
| 28                           | 2005 | 22    | 161  | 56    | 0            | 239   | 14             | 35             |
| 28                           | 2006 | 19    | 157  | 59    | 1            | 236   | 12             | 38             |
| 28                           | 2007 | 26    | 184  | 72    | 0            | 282   | 14             | 39             |
| 28                           | 2008 | 25    | 123  | 50    | 0            | 198   | 20             | 41             |
| 29                           | 2004 | 16    | 148  | 28    | 0            | 192   | 11             | 19             |
| 29                           | 2005 | 21    | 175  | 43    | 0            | 239   | 12             | 25             |
| 29                           | 2006 | 19    | 161  | 37    | 0            | 217   | 12             | 23             |
| 29                           | 2007 | 27    | 171  | 24    | 0            | 222   | 16             | 14             |
| 29                           | 2008 | 30    | 150  | 28    | 0            | 208   | 20             | 19             |
| 30A                          | 2004 | 20    | 240  | 63    | 0            | 323   | 8              | 26             |
| 30A                          | 2005 | 42    | 205  | 66    | 1            | 314   | 20             | 32             |
| 30A                          | 2006 | 21    | 217  | 67    | 0            | 305   | 10             | 31             |
| 30A                          | 2007 | 32    | 186  | 66    | 0            | 284   | 17             | 35             |
| 30A                          | 2008 | 31    | 155  | 68    | 1            | 255   | 20             | 44             |
| 30B                          | 2004 | 31    | 172  | 93    | 0            | 296   | 18             | 54             |
| 30B                          | 2005 | 15    | 154  | 80    | 2            | 251   | 10             | 52             |
| 30B                          | 2006 | 10    | 100  | 37    | 0            | 147   | 10             | 37             |
| 30B                          | 2007 | 25    | 123  | 79    | 1            | 228   | 20             | 64             |
| 30B                          | 2008 | 8     | 49   | 29    | 3            | 89    | 16             | 59             |
| 31                           | 2004 | 35    | 144  | 45    | 0            | 224   | 24             | 31             |
| 31                           | 2005 | 10    | 91   | 27    | 0            | 128   | 11             | 30             |
| 31                           | 2006 | 20    | 127  | 35    | 3            | 185   | 16             | 28             |
| 31                           | 2007 | 24    | 143  | 42    | 1            | 210   | 17             | 29             |
| 31                           | 2008 | 23    | 135  | 42    | 0            | 200   | 17             | 31             |

# Deer Survey Data

## 5-Year: 2004-2008 Deer Survey Data

| Unit                         | Year | Bucks | Does | Fawns | Unclassified | Total | Bucks/100 Does | Fawns/100 Does |
|------------------------------|------|-------|------|-------|--------------|-------|----------------|----------------|
| <b>MULE DEER (continued)</b> |      |       |      |       |              |       |                |                |
| 32                           | 2004 | 23    | 298  | 105   | 17           | 443   | 8              | 35             |
| 32                           | 2005 | 25    | 289  | 116   | 0            | 430   | 9              | 40             |
| 32                           | 2006 | 28    | 231  | 59    | 0            | 318   | 12             | 26             |
| 32                           | 2007 | 34    | 340  | 112   | 6            | 492   | 10             | 33             |
| 32                           | 2008 | 33    | 272  | 94    | 19           | 418   | 12             | 35             |
| 33                           | 2004 | 10    | 42   | 26    | 0            | 78    | 24             | 62             |
| 33                           | 2005 | 5     | 25   | 13    | 0            | 43    | 20             | 52             |
| 33                           | 2006 | 7     | 52   | 15    | 0            | 74    | 13             | 29             |
| 33                           | 2007 | 5     | 22   | 10    | 0            | 37    | 23             | 45             |
| 33                           | 2008 | 8     | 47   | 17    | 3            | 75    | 17             | 36             |
| 34A                          | 2004 | 3     | 16   | 3     | 0            | 22    | 19             | 19             |
| 34A                          | 2005 | 1     | 20   | 10    | 0            | 31    | 5              | 50             |
| 34A                          | 2006 | 0     | 4    | 1     | 0            | 5     | 0              | 25             |
| 34A                          | 2007 | 10    | 35   | 17    | 0            | 62    | 29             | 49             |
| 34A                          | 2008 | 1     | 5    | 5     | 0            | 11    | 20             | 100            |
| 34B                          | 2004 | 14    | 20   | 9     | 10           | 53    | 70             | 45             |
| 34B                          | 2005 | 4     | 14   | 9     | 0            | 27    | 29             | 64             |
| 34B                          | 2006 | 1     | 20   | 10    | 0            | 31    | 5              | 50             |
| 34B                          | 2007 | 5     | 16   | 9     | 0            | 30    | 31             | 56             |
| 34B                          | 2008 | 1     | 8    | 5     | 0            | 14    | 13             | 63             |
| 35A                          | 2004 | 9     | 85   | 48    | 0            | 142   | 11             | 56             |
| 35A                          | 2005 | 8     | 52   | 23    | 1            | 84    | 15             | 44             |
| 35A                          | 2006 | 8     | 27   | 17    | 0            | 52    | 30             | 63             |
| 35A                          | 2007 | 12    | 46   | 18    | 0            | 76    | 26             | 39             |
| 35A                          | 2008 | 3     | 27   | 11    | 0            | 41    | 11             | 41             |
| 35B                          | 2004 | 17    | 56   | 24    | 0            | 97    | 30             | 43             |
| 35B                          | 2005 | 9     | 44   | 18    | 0            | 71    | 20             | 41             |
| 35B                          | 2006 | 1     | 12   | 6     | 0            | 19    | 8              | 50             |
| 35B                          | 2007 | 6     | 16   | 11    | 0            | 33    | 38             | 69             |
| 35B                          | 2008 | 5     | 22   | 13    | 0            | 40    | 23             | 59             |
| 36A                          | 2004 | 29    | 152  | 73    | 0            | 254   | 19             | 48             |
| 36A                          | 2005 | 29    | 160  | 82    | 3            | 274   | 18             | 51             |
| 36A                          | 2006 | 22    | 183  | 56    | 17           | 278   | 12             | 31             |
| 36A                          | 2007 | 13    | 182  | 76    | 2            | 273   | 7              | 42             |
| 36A                          | 2008 | 7     | 71   | 46    | 3            | 127   | 10             | 65             |
| 36B                          | 2004 | 18    | 137  | 85    | 0            | 240   | 13             | 62             |
| 36B                          | 2005 | 13    | 105  | 60    | 0            | 178   | 12             | 57             |
| 36B                          | 2006 | 12    | 105  | 51    | 3            | 171   | 11             | 49             |
| 36B                          | 2007 | 11    | 77   | 33    | 1            | 122   | 14             | 43             |
| 36B                          | 2008 | 11    | 137  | 80    | 0            | 228   | 8              | 58             |
| 36C                          | 2004 | 17    | 109  | 54    | 0            | 180   | 16             | 50             |
| 36C                          | 2005 | 5     | 43   | 16    | 8            | 72    | 12             | 37             |
| 36C                          | 2006 | 10    | 56   | 11    | 0            | 77    | 18             | 20             |
| 36C                          | 2007 | 2     | 40   | 19    | 0            | 61    | 5              | 48             |
| 36C                          | 2008 | 5     | 30   | 20    | 4            | 59    | 17             | 67             |
| 37A                          | 2004 | 7     | 15   | 1     | 0            | 23    | 47             | 7              |
| 37A                          | 2005 | 4     | 10   | 6     | 0            | 20    | 40             | 60             |
| 37A                          | 2006 | 5     | 6    | 3     | 0            | 14    | 83             | 50             |
| 37A                          | 2007 | 17    | 21   | 10    | 0            | 48    | 81             | 48             |
| 37A                          | 2008 | 16    | 15   | 6     | 0            | 37    | 107            | 40             |
| 37B                          | 2004 | 5     | 20   | 6     | 0            | 31    | 25             | 30             |
| 37B                          | 2005 | 9     | 12   | 6     | 4            | 31    | 75             | 50             |
| 37B                          | 2006 | 8     | 24   | 11    | 1            | 44    | 33             | 46             |
| 37B                          | 2007 | 5     | 25   | 18    | 2            | 50    | 20             | 72             |
| 37B                          | 2008 | 17    | 36   | 28    | 0            | 81    | 47             | 78             |
| 39                           | 2004 | 6     | 37   | 14    | 0            | 57    | 16             | 38             |
| 39                           | 2005 | 8     | 29   | 15    | 0            | 52    | 28             | 52             |
| 39                           | 2006 | 8     | 46   | 26    | 0            | 80    | 17             | 57             |
| 39                           | 2007 | 11    | 50   | 9     | 0            | 70    | 22             | 18             |
| 39                           | 2008 | 11    | 25   | 10    | 4            | 50    | 44             | 40             |
| 39M                          | 2005 | 1     | 0    | 0     | 0            | 1     | —              | —              |
| 40                           | 2004 | 8     | 10   | 5     | 1            | 24    | 80             | 50             |
| 40                           | 2005 | 4     | 7    | 1     | 0            | 12    | 57             | 14             |
| 40                           | 2006 | 9     | 20   | 10    | 0            | 39    | 45             | 50             |

# Deer Survey Data

## 5-Year: 2004-2008 Deer Survey Data

| Unit                         | Year | Bucks | Does | Fawns | Unclassified | Total | Bucks/100 Does | Fawns/100 Does |
|------------------------------|------|-------|------|-------|--------------|-------|----------------|----------------|
| <b>MULE DEER (continued)</b> |      |       |      |       |              |       |                |                |
| 40                           | 2007 | 3     | 7    | 3     | 0            | 13    | 43             | 43             |
| 40                           | 2008 | 2     | 8    | 3     | 0            | 13    | 25             | 38             |
| 41                           | 2004 | 20    | 70   | 24    | 0            | 114   | 29             | 34             |
| 41                           | 2005 | 21    | 53   | 27    | 2            | 103   | 40             | 51             |
| 41                           | 2006 | 23    | 152  | 76    | 4            | 255   | 15             | 50             |
| 41                           | 2007 | 20    | 52   | 24    | 0            | 96    | 38             | 46             |
| 41                           | 2008 | 26    | 55   | 21    | 3            | 105   | 47             | 38             |
| 42                           | 2004 | 29    | 62   | 19    | 1            | 111   | 47             | 31             |
| 42                           | 2005 | 28    | 114  | 72    | 0            | 214   | 25             | 63             |
| 42                           | 2006 | 32    | 137  | 64    | 0            | 233   | 23             | 47             |
| 42                           | 2007 | 16    | 43   | 17    | 0            | 76    | 37             | 40             |
| 42                           | 2008 | 47    | 104  | 43    | 1            | 195   | 45             | 41             |
| 43A                          | 2004 | 2     | 7    | 1     | 0            | 10    | 29             | 14             |
| 43A                          | 2005 | 2     | 10   | 6     | 0            | 18    | 20             | 60             |
| 43A                          | 2006 | 2     | 8    | 3     | 0            | 13    | 25             | 38             |
| 43A                          | 2007 | 3     | 17   | 4     | 5            | 29    | 18             | 24             |
| 43A                          | 2008 | 6     | 12   | 3     | 0            | 21    | 50             | 25             |
| 43B                          | 2004 | 3     | 13   | 5     | 0            | 21    | 23             | 38             |
| 43B                          | 2005 | 4     | 17   | 10    | 0            | 31    | 24             | 59             |
| 43B                          | 2006 | 1     | 12   | 5     | 0            | 18    | 8              | 42             |
| 43B                          | 2007 | 3     | 11   | 3     | 0            | 17    | 27             | 27             |
| 43B                          | 2008 | 8     | 24   | 13    | 0            | 45    | 33             | 54             |
| 44A                          | 2004 | 22    | 69   | 20    | 1            | 112   | 32             | 29             |
| 44A                          | 2005 | 39    | 88   | 41    | 4            | 172   | 44             | 47             |
| 44A                          | 2006 | 24    | 102  | 41    | 0            | 167   | 24             | 40             |
| 44A                          | 2007 | 24    | 76   | 18    | 0            | 118   | 32             | 24             |
| 44A                          | 2008 | 29    | 73   | 37    | 0            | 139   | 40             | 51             |
| 45                           | 2004 | 21    | 76   | 16    | 0            | 113   | 28             | 21             |
| 45                           | 2005 | 26    | 77   | 43    | 0            | 146   | 34             | 56             |
| 45                           | 2006 | 27    | 54   | 20    | 1            | 102   | 50             | 37             |
| 45                           | 2007 | 26    | 60   | 18    | 1            | 105   | 43             | 30             |
| 45                           | 2008 | 19    | 56   | 15    | 0            | 90    | 34             | 27             |
| <b>WHITE-TAILED DEER</b>     |      |       |      |       |              |       |                |                |
| 1                            | 2004 | 1     | 4    | 1     | 0            | 6     | 25             | 25             |
| 1                            | 2005 | 0     | 1    | 0     | 0            | 1     | 0              | 0              |
| 1                            | 2007 | 0     | 10   | 6     | 0            | 16    | 0              | 60             |
| 1                            | 2008 | 2     | 1    | 0     | 0            | 3     | 200            | 0              |
| 4                            | 2005 | 1     | 1    | 0     | 0            | 2     | 100            | 0              |
| 4                            | 2007 | 0     | 2    | 0     | 0            | 2     | 0              | 0              |
| 4                            | 2008 | 4     | 5    | 3     | 0            | 12    | 80             | 60             |
| 5                            | 2004 | 1     | 0    | 0     | 0            | 1     | –              | –              |
| 5                            | 2005 | 1     | 3    | 2     | 0            | 6     | 33             | 67             |
| 6A                           | 2004 | 26    | 58   | 25    | 3            | 112   | 45             | 43             |
| 6A                           | 2005 | 21    | 66   | 30    | 0            | 117   | 32             | 45             |
| 6A                           | 2006 | 17    | 47   | 19    | 0            | 83    | 36             | 40             |
| 6A                           | 2007 | 26    | 53   | 10    | 1            | 90    | 49             | 19             |
| 6A                           | 2008 | 22    | 51   | 19    | 0            | 92    | 43             | 37             |
| 6B                           | 2004 | 1     | 13   | 3     | 2            | 19    | 8              | 23             |
| 6B                           | 2005 | 2     | 6    | 3     | 0            | 11    | 33             | 50             |
| 6B                           | 2006 | 4     | 10   | 1     | 0            | 15    | 40             | 10             |
| 6B                           | 2007 | 4     | 13   | 1     | 0            | 18    | 31             | 8              |
| 6B                           | 2008 | 2     | 9    | 4     | 0            | 15    | 22             | 44             |
| 8                            | 2004 | 0     | 0    | 0     | 1            | 1     | –              | –              |
| 8                            | 2005 | 1     | 7    | 1     | 0            | 9     | 14             | 14             |
| 8                            | 2006 | 2     | 0    | 0     | 0            | 2     | –              | –              |
| 8                            | 2007 | 2     | 6    | 0     | 0            | 8     | 33             | 0              |
| 8                            | 2008 | 13    | 24   | 6     | 3            | 46    | 54             | 25             |
| 19A                          | 2005 | 0     | 2    | 2     | 0            | 4     | 0              | 100            |
| 19A                          | 2006 | 2     | 6    | 0     | 0            | 8     | 33             | 0              |
| 21                           | 2004 | 9     | 39   | 18    | 0            | 66    | 23             | 46             |
| 21                           | 2005 | 16    | 52   | 20    | 0            | 88    | 31             | 38             |
| 21                           | 2006 | 25    | 51   | 15    | 4            | 95    | 49             | 29             |
| 21                           | 2007 | 17    | 63   | 12    | 0            | 92    | 27             | 19             |

# Deer Survey Data

## 5-Year: 2004-2008 Deer Survey Data

| Unit                                 | Year | Bucks | Does | Fawns | Unclassified | Total | Bucks/100 Does | Fawns/100 Does |
|--------------------------------------|------|-------|------|-------|--------------|-------|----------------|----------------|
| <b>WHITE-TAILED DEER (continued)</b> |      |       |      |       |              |       |                |                |
| 21                                   | 2008 | 20    | 66   | 17    | 0            | 103   | 30             | 26             |
| 22                                   | 2004 | 29    | 93   | 11    | 1            | 134   | 31             | 12             |
| 22                                   | 2005 | 38    | 92   | 23    | 0            | 153   | 41             | 25             |
| 22                                   | 2006 | 29    | 112  | 17    | 0            | 158   | 26             | 15             |
| 22                                   | 2007 | 78    | 173  | 62    | 0            | 313   | 45             | 36             |
| 22                                   | 2008 | 38    | 108  | 43    | 0            | 189   | 35             | 40             |
| 23                                   | 2004 | 36    | 66   | 31    | 1            | 134   | 55             | 47             |
| 23                                   | 2005 | 17    | 54   | 22    | 1            | 94    | 31             | 41             |
| 23                                   | 2006 | 29    | 73   | 34    | 0            | 136   | 40             | 47             |
| 23                                   | 2007 | 19    | 54   | 20    | 1            | 94    | 35             | 37             |
| 23                                   | 2008 | 28    | 95   | 52    | 0            | 175   | 29             | 55             |
| 24A                                  | 2004 | 19    | 103  | 43    | 3            | 168   | 18             | 42             |
| 24A                                  | 2005 | 30    | 64   | 18    | 0            | 112   | 47             | 28             |
| 24A                                  | 2006 | 25    | 77   | 28    | 0            | 130   | 32             | 36             |
| 24A                                  | 2007 | 29    | 73   | 26    | 1            | 129   | 40             | 36             |
| 24A                                  | 2008 | 37    | 75   | 36    | 0            | 148   | 49             | 48             |
| 24B                                  | 2004 | 28    | 78   | 28    | 0            | 134   | 36             | 36             |
| 24B                                  | 2005 | 24    | 88   | 28    | 0            | 140   | 27             | 32             |
| 24B                                  | 2006 | 45    | 110  | 46    | 2            | 203   | 41             | 42             |
| 24B                                  | 2007 | 46    | 107  | 29    | 0            | 182   | 43             | 27             |
| 24B                                  | 2008 | 34    | 69   | 39    | 0            | 142   | 49             | 57             |
| 27                                   | 2004 | 10    | 38   | 6     | 0            | 54    | 26             | 16             |
| 27                                   | 2005 | 16    | 67   | 8     | 0            | 91    | 24             | 12             |
| 27                                   | 2006 | 15    | 49   | 15    | 0            | 79    | 31             | 31             |
| 27                                   | 2007 | 19    | 55   | 21    | 0            | 95    | 35             | 38             |
| 27                                   | 2008 | 18    | 43   | 20    | 0            | 81    | 42             | 47             |
| 28                                   | 2004 | 1     | 2    | 1     | 0            | 4     | 50             | 50             |
| 28                                   | 2006 | 0     | 1    | 2     | 0            | 3     | 0              | 200            |
| 28                                   | 2008 | 1     | 2    | 0     | 0            | 3     | 50             | 0              |
| 29                                   | 2004 | 35    | 162  | 13    | 1            | 211   | 22             | 8              |
| 29                                   | 2005 | 22    | 106  | 30    | 5            | 163   | 21             | 28             |
| 29                                   | 2006 | 20    | 121  | 39    | 1            | 181   | 17             | 32             |
| 29                                   | 2007 | 23    | 120  | 17    | 3            | 163   | 19             | 14             |
| 29                                   | 2008 | 22    | 104  | 14    | 0            | 140   | 21             | 13             |
| 30A                                  | 2004 | 28    | 112  | 19    | 0            | 159   | 25             | 17             |
| 30A                                  | 2005 | 20    | 83   | 30    | 1            | 134   | 24             | 36             |
| 30A                                  | 2006 | 17    | 106  | 29    | 0            | 152   | 16             | 27             |
| 30A                                  | 2007 | 17    | 70   | 17    | 1            | 105   | 24             | 24             |
| 30A                                  | 2008 | 31    | 68   | 19    | 2            | 120   | 46             | 28             |
| 30B                                  | 2004 | 30    | 93   | 50    | 2            | 175   | 32             | 54             |
| 30B                                  | 2005 | 18    | 90   | 62    | 5            | 175   | 20             | 69             |
| 30B                                  | 2006 | 20    | 93   | 30    | 2            | 145   | 22             | 32             |
| 30B                                  | 2007 | 43    | 112  | 77    | 4            | 236   | 38             | 69             |
| 30B                                  | 2008 | 36    | 116  | 39    | 3            | 194   | 31             | 34             |
| 31                                   | 2004 | 28    | 104  | 37    | 4            | 173   | 27             | 36             |
| 31                                   | 2005 | 23    | 73   | 21    | 0            | 117   | 32             | 29             |
| 31                                   | 2006 | 33    | 82   | 22    | 1            | 138   | 40             | 27             |
| 31                                   | 2007 | 20    | 79   | 17    | 1            | 117   | 25             | 22             |
| 31                                   | 2008 | 18    | 81   | 15    | 1            | 115   | 22             | 19             |
| 32                                   | 2004 | 47    | 181  | 52    | 5            | 285   | 26             | 29             |
| 32                                   | 2005 | 33    | 123  | 38    | 3            | 197   | 27             | 31             |
| 32                                   | 2006 | 25    | 89   | 16    | 1            | 131   | 28             | 18             |
| 32                                   | 2007 | 49    | 189  | 43    | 8            | 289   | 26             | 23             |
| 32                                   | 2008 | 32    | 133  | 30    | 5            | 200   | 24             | 23             |
| 33                                   | 2004 | 59    | 270  | 107   | 3            | 439   | 22             | 40             |
| 33                                   | 2005 | 48    | 154  | 37    | 0            | 239   | 31             | 24             |
| 33                                   | 2006 | 53    | 208  | 64    | 8            | 333   | 25             | 31             |
| 33                                   | 2007 | 96    | 368  | 155   | 18           | 637   | 26             | 42             |
| 33                                   | 2008 | 83    | 408  | 140   | 2            | 633   | 20             | 34             |
| 34A                                  | 2004 | 29    | 189  | 35    | 3            | 256   | 15             | 19             |
| 34A                                  | 2005 | 41    | 211  | 80    | 1            | 333   | 19             | 38             |
| 34A                                  | 2006 | 30    | 170  | 81    | 8            | 289   | 18             | 48             |
| 34A                                  | 2007 | 39    | 211  | 71    | 5            | 326   | 18             | 34             |
| 34A                                  | 2008 | 38    | 138  | 50    | 7            | 233   | 28             | 36             |



## Deer Survey Data

### *5-Year: 2004-2008 Deer Survey Data*

| Unit                                 | Year | Bucks | Does | Fawns | Unclassified | Total | Bucks/100 Does | Fawns/100 Does |
|--------------------------------------|------|-------|------|-------|--------------|-------|----------------|----------------|
| <b>WHITE-TAILED DEER (continued)</b> |      |       |      |       |              |       |                |                |
| 34B                                  | 2004 | 16    | 50   | 15    | 5            | 86    | 32             | 30             |
| 34B                                  | 2005 | 19    | 113  | 25    | 4            | 161   | 17             | 22             |
| 34B                                  | 2006 | 30    | 101  | 47    | 2            | 180   | 30             | 47             |
| 34B                                  | 2007 | 25    | 102  | 41    | 5            | 173   | 25             | 40             |
| 34B                                  | 2008 | 20    | 80   | 16    | 0            | 116   | 25             | 20             |
| 35A                                  | 2004 | 31    | 102  | 31    | 2            | 166   | 30             | 30             |
| 35A                                  | 2005 | 16    | 58   | 23    | 0            | 97    | 28             | 40             |
| 35A                                  | 2006 | 29    | 52   | 28    | 0            | 109   | 56             | 54             |
| 35A                                  | 2007 | 22    | 72   | 28    | 2            | 124   | 31             | 39             |
| 35A                                  | 2008 | 31    | 76   | 38    | 0            | 145   | 41             | 50             |
| 35B                                  | 2004 | 27    | 101  | 39    | 3            | 170   | 27             | 39             |
| 35B                                  | 2005 | 28    | 82   | 29    | 1            | 140   | 34             | 35             |
| 35B                                  | 2006 | 34    | 102  | 57    | 5            | 198   | 33             | 56             |
| 35B                                  | 2007 | 33    | 88   | 38    | 2            | 161   | 38             | 43             |
| 35B                                  | 2008 | 32    | 75   | 28    | 5            | 140   | 43             | 37             |
| 36A                                  | 2004 | 42    | 171  | 61    | 2            | 276   | 25             | 36             |
| 36A                                  | 2005 | 37    | 182  | 87    | 2            | 308   | 20             | 48             |
| 36A                                  | 2006 | 25    | 106  | 44    | 1            | 176   | 24             | 42             |
| 36A                                  | 2007 | 31    | 133  | 54    | 4            | 222   | 23             | 41             |
| 36A                                  | 2008 | 24    | 103  | 54    | 1            | 182   | 23             | 52             |
| 36B                                  | 2004 | 62    | 278  | 115   | 1            | 456   | 22             | 41             |
| 36B                                  | 2005 | 47    | 173  | 86    | 8            | 314   | 27             | 50             |
| 36B                                  | 2006 | 28    | 143  | 57    | 1            | 229   | 20             | 40             |
| 36B                                  | 2007 | 24    | 77   | 31    | 0            | 132   | 31             | 40             |
| 36B                                  | 2008 | 37    | 154  | 78    | 3            | 272   | 24             | 51             |
| 36C                                  | 2004 | 41    | 116  | 35    | 3            | 195   | 35             | 30             |
| 36C                                  | 2005 | 23    | 80   | 33    | 10           | 146   | 29             | 41             |
| 36C                                  | 2006 | 42    | 143  | 46    | 2            | 233   | 29             | 32             |
| 36C                                  | 2007 | 20    | 86   | 24    | 0            | 130   | 23             | 28             |
| 36C                                  | 2008 | 32    | 78   | 39    | 1            | 150   | 41             | 50             |
| 37A                                  | 2005 | 2     | 0    | 0     | 0            | 2     | –              | –              |
| 37A                                  | 2006 | 2     | 1    | 1     | 0            | 4     | 200            | 100            |
| 37A                                  | 2007 | 1     | 1    | 0     | 0            | 2     | 100            | 0              |
| 37A                                  | 2008 | 3     | 2    | 0     | 0            | 5     | 150            | 0              |
| 37B                                  | 2004 | 0     | 0    | 1     | 0            | 1     | –              | –              |
| 37B                                  | 2006 | 0     | 2    | 0     | 0            | 2     | 0              | 0              |
| 37B                                  | 2007 | 1     | 2    | 0     | 0            | 3     | 50             | 0              |

# Deer Harvest Data

## Historic Summary of General Deer Hunts<sup>1</sup>

| Year² | 1st Choice Applicants | Permits Issued | Hunters | Hunter Days | Deer Harvest |        |           |        |       | Percent Success |
|-------|-----------------------|----------------|---------|-------------|--------------|--------|-----------|--------|-------|-----------------|
|       |                       |                |         |             | Mule Deer    |        | Whitetail |        | Total |                 |
|       |                       |                |         |             | Bucks        | A-less | Bucks     | A-less |       |                 |
| 1946  | —                     | —              | —       | —           | 4733         | —      | 991       | —      | 5724  | —               |
| 1947  | —                     | —              | —       | —           | 6420         | —      | 1152      | —      | 7572  | —               |
| 1948  | —                     | —              | —       | —           | 7358         | —      | 1347      | —      | 8705  | —               |
| 1949  | —                     | —              | —       | —           | 7465         | 386    | 1203      | —      | 9054  | —               |
| 1950  | —                     | —              | —       | —           | 9009         | 798    | 1175      | —      | 10982 | —               |
| 1951  | —                     | —              | —       | —           | 9618         | 658    | 1234      | —      | 11510 | —               |
| 1952  | —                     | —              | —       | —           | 10575        | 2707   | 1490      | —      | 14772 | —               |
| 1953  | —                     | —              | —       | —           | 12590        | 3948   | 1791      | —      | 18329 | —               |
| 1954  | —                     | —              | —       | —           | 11662        | 6425   | 1500      | —      | 19587 | —               |
| 1955  | —                     | —              | 53791   | —           | 15220        | 5483   | 1489      | 300    | 22492 | 42              |
| 1956  | —                     | —              | 64123   | —           | 16175        | 8943   | 2066      | 357    | 27541 | 43              |
| 1957  | —                     | —              | 56499   | —           | 15307        | 4859   | 1808      | 593    | 22567 | 40              |
| 1958  | —                     | —              | 76358   | 259876      | 17994        | 9840   | 3394      | 1702   | 32930 | 43              |
| 1959  | —                     | —              | 78102   | 290686      | 16329        | 7769   | 3105      | 1687   | 28890 | 37              |
| 1960  | —                     | —              | 87986   | 318806      | 19291        | 8380   | 3871      | 1111   | 32653 | 37              |
| 1961  | —                     | —              | 91120   | 350200      | 22459        | 8307   | 3891      | 843    | 35500 | 39              |
| 1962  | —                     | —              | 93337   | 373035      | 16658        | 7579   | 3211      | 983    | 28431 | 31              |
| 1963  | —                     | —              | 92594   | 371619      | 14082        | 6262   | 2859      | 1463   | 24666 | 27              |
| 1964  | —                     | —              | 86867   | 335508      | 12613        | 2362   | 3207      | 1116   | 19298 | 22              |
| 1965  | —                     | —              | 87548   | 316911      | 11357        | 2002   | 2871      | 741    | 16971 | 19              |
| 1966  | —                     | —              | 88230   | 354586      | 12158        | 2040   | 2390      | 597    | 17185 | 20              |
| 1967  | —                     | —              | 90361   | 365358      | 12350        | 1388   | 2404      | 258    | 16400 | 18              |
| 1968  | —                     | —              | 88253   | 359684      | 12298        | 741    | 2722      | 205    | 15966 | 18              |
| 1969  | —                     | —              | 91575   | 358833      | 12203        | 567    | 2124      | 78     | 14972 | 16              |
| 1970  | —                     | —              | 97113   | 395038      | 13167        | 420    | 2197      | 35     | 15819 | 16              |
| 1971  | —                     | 77437          | 67263   | 256100      | 9129         | 334    | 1517      | 18     | 10998 | 16              |
| 1972  | 66905                 | 74096          | 63269   | 241882      | 9137         | 338    | 1653      | 17     | 11145 | 18              |
| 1973  | 83334                 | 75200          | 64120   | 243322      | 11114        | 402    | 2080      | 22     | 13618 | 21              |
| 1974  | 79664                 | 82650          | 72352   | 255592      | 11715        | 533    | 3221      | 0      | 15469 | 21              |
| 1975  | 80929                 | 79750          | 69262   | 253721      | 12576        | 408    | 2870      | 0      | 15854 | 23              |
| 1976  | 86829                 | 83125          | 72049   | 228763      | 10578        | 261    | 2656      | 0      | 13495 | 19              |
| 1977  | 83593                 | 84265          | 72472   | 255850      | 9871         | 6      | 2295      | 24     | 12196 | 17              |
| 1978  | 84017                 | 81675          | 69709   | 264624      | 9075         | 38     | 2247      | 40     | 11400 | 16              |
| 1979  | 85072                 | 78215          | 66451   | 270068      | 10347        | 0      | 3207      | 54     | 13608 | 21              |
| 1980  | 94285                 | 79409          | 66909   | 278520      | 11111        | 0      | 3480      | 46     | 14637 | 22              |
| 1981  | 92679                 | 77755          | 66308   | 274028      | 10825        | 0      | 3466      | 38     | 14329 | 22              |
| 1982  | 91673                 | 83045          | 71123   | 296368      | 12187        | 0      | 3965      | 34     | 16186 | 23              |
| 1983  | 71826                 | 94285          | 77106   | 309699      | 12767        | 0      | 4173      | 51     | 16991 | 22              |
| 1984  | 72989                 | 92545          | 82618   | 328231      | 17102        | 0      | 7030      | 75     | 24207 | 29              |
| 1985  | 80014                 | 92345          | 84079   | 333156      | 16292        | 273    | 6782      | 110    | 23457 | 28              |
| 1986  | 82982                 | 94871          | 84687   | 331015      | 16493        | 2961   | 5829      | 86     | 25369 | 30              |
| 1987  | 84145                 | 87340          | 79557   | 304440      | 15081        | 2191   | 4777      | 92     | 22141 | 28              |
| 1988  | 85084                 | 79135          | 72796   | 290084      | 13744        | 1781   | 4505      | 75     | 20105 | 28              |
| 1989  | 84485                 | 75925          | 69974   | 277264      | 13516        | 694    | 4293      | 84     | 18587 | 27              |
| 1990  | 82911                 | 76620          | 70901   | 284643      | 11278        | 2809   | 4368      | 62     | 18517 | 26              |
| 1991  | 79466                 | 68304          | 63109   | 256780      | 12101        | 0      | 5268      | 76     | 17445 | 28              |
| 1992  | 85343                 | 68910          | 64143   | 256592      | 11997        | 0      | 5639      | 75     | 17711 | 28              |
| 1993  | 87558                 | 70348          | 65151   | 260399      | 11879        | 0      | 5489      | 58     | 17426 | 27              |
| 1994  | 92904                 | 68849          | 63330   | 256856      | 10867        | 0      | 5336      | 0      | 16203 | 26              |
| 1995  | 92139                 | 63708          | 58649   | 242281      | 8824         | 0      | 4876      | 0      | 13700 | 23              |
| 1996  | 88529                 | 57570          | 52679   | 212116      | 7229         | 0      | 4091      | 0      | 11320 | 22              |
| 1997  | 89627                 | 51222          | 47210   | 195719      | 6065         | 0      | 4154      | 33     | 10252 | 22              |
| 1998  | 88329                 | 46694          | 42753   | 173577      | 5877         | 0      | 4095      | 7      | 9979  | 24              |
| 1999  | 92104                 | 47065          | 42970   | 175908      | 5924         | 310    | 3264      | 8      | 9506  | 22              |

<sup>1</sup> Muzzleloader hunt data included up until 1984. Juniors-Only hunt data not included in this table.

<sup>2</sup> 1994 and 1995 data does not include results of hunts at Ft. Huachuca. Beginning with 1996, Ft. Huachuca data is based on questionnaire returns, not data gathered by the Fort.

## Deer Harvest Data

### *Historic Summary of General Deer Hunts<sup>1</sup>*

| Year² | 1st Choice Applicants | Permits Issued | Hunters | Hunter Days | Deer Harvest |        |           |        |       | Percent Success |
|-------|-----------------------|----------------|---------|-------------|--------------|--------|-----------|--------|-------|-----------------|
|       |                       |                |         |             | Mule Deer    |        | Whitetail |        | Total |                 |
|       |                       |                |         |             | Bucks        | A-less | Bucks     | A-less |       |                 |
| 2000  | 85091                 | 46072          | 41677   | 166780      | 5025         | 188    | 4121      | 0      | 9334  | 22              |
| 2001  | 83808                 | 44978          | 41110   | 170820      | 5226         | 623    | 3369      | 0      | 9218  | 22              |
| 2002  | 84384                 | 42020          | 38368   | 163098      | 4540         | 0      | 3595      | 0      | 8135  | 21              |
| 2003  | 86546                 | 37260          | 33905   | 144027      | 3753         | 0      | 3937      | 0      | 7690  | 23              |
| 2004  | 90057                 | 36665          | 33395   | 136377      | 4037         | 0      | 4515      | 0      | 8552  | 26              |
| 2005  | 83264                 | 37918          | 34883   | 144949      | 4357         | 0      | 4214      | 0      | 8571  | 25              |
| 2006  | 85534                 | 38138          | 35016   | 147433      | 4811         | 0      | 4158      | 0      | 8969  | 26              |
| 2007  | 68625                 | 39834          | 37002   | 158215      | 5388         | 0      | 4362      | 0      | 9750  | 26              |
| 2008  | 62236                 | 41958          | 38770   | 157646      | 5215         | 0      | 5094      | 0      | 10309 | 27              |

<sup>1</sup> Muzzleloader hunt data included up until 1984. Juniors-Only hunt data not included in this table.

<sup>2</sup> 1994 and 1995 data does not include results of hunts at Ft. Huachuca. Beginning with 1996, Ft. Huachuca data is based on questionnaire returns, not data gathered by the Fort.

### *Historic Summary of Juniors-Only Deer Hunts*

| Year | 1st Choice Applicants | Permits Issued | Hunters | Hunter Days | Deer Harvest |        |           |        |       | Percent Success |
|------|-----------------------|----------------|---------|-------------|--------------|--------|-----------|--------|-------|-----------------|
|      |                       |                |         |             | Mule Deer    |        | Whitetail |        | Total |                 |
|      |                       |                |         |             | Bucks        | A-less | Bucks     | A-less |       |                 |
| 1992 | 299                   | 350            | 336     | 1386        | 147          | 0      | 2         | 0      | 149   | 44              |
| 1993 | 403                   | 150            | 148     | 569         | 88           | 0      | 7         | 0      | 95    | 64              |
| 1994 | 608                   | 275            | 264     | 1073        | 158          | 0      | 14        | 0      | 172   | 65              |
| 1995 | 837                   | 339            | 331     | 1450        | 177          | 0      | 18        | 0      | 195   | 59              |
| 1996 | 1076                  | 706            | 649     | 2262        | 178          | 0      | 21        | 0      | 199   | 31              |
| 1997 | 1155                  | 603            | 543     | 2083        | 159          | 0      | 35        | 0      | 194   | 36              |
| 1998 | 1497                  | 808            | 763     | 2502        | 263          | 0      | 42        | 0      | 305   | 40              |
| 1999 | 1897                  | 1224           | 1100    | 2719        | 280          | 360    | 41        | 0      | 681   | 61              |
| 2000 | 2427                  | 1250           | 1134    | 2959        | 167          | 395    | 57        | 0      | 619   | 55              |
| 2001 | 2571                  | 1625           | 1449    | 3858        | 166          | 591    | 47        | 0      | 804   | 55              |
| 2002 | 2863                  | 1510           | 1394    | 4117        | 141          | 462    | 37        | 0      | 640   | 46              |
| 2003 | 2855                  | 980            | 904     | 2704        | 114          | 301    | 44        | 0      | 459   | 51              |
| 2004 | 2815                  | 1030           | 923     | 2711        | 149          | 225    | 54        | 0      | 428   | 46              |
| 2005 | 2634                  | 1280           | 1143    | 3258        | 140          | 269    | 34        | 0      | 443   | 39              |
| 2006 | 2581                  | 1332           | 1219    | 4469        | 291          | 64     | 148       | 0      | 503   | 41              |
| 2007 | 2520                  | 1769           | 1633    | 5601        | 342          | 269    | 223       | 0      | 834   | 51              |
| 2008 | 2668                  | 2109           | 1941    | 6032        | 367          | 364    | 195       | 0      | 926   | 48              |

## Deer Harvest Data

### *Historic Summary of Muzzleloader Deer Hunts*

| Year | 1st Choice Applicants | Permits Issued | Hunters | Hunter Days | Deer Harvest |        |           |        |       | Percent Success |
|------|-----------------------|----------------|---------|-------------|--------------|--------|-----------|--------|-------|-----------------|
|      |                       |                |         |             | Mule Deer    |        | Whitetail |        | Total |                 |
|      |                       |                |         |             | Bucks        | A-less | Bucks     | A-less |       |                 |
| 1984 | 424                   | 950            | 664     | 3035        | 200          | 0      | 11        | 0      | 211   | 32              |
| 1985 | 263                   | 950            | 739     | 3154        | 201          | 0      | 10        | 0      | 211   | 29              |
| 1986 | 337                   | 950            | 840     | 3947        | 178          | 0      | 19        | 0      | 197   | 23              |
| 1987 | 402                   | 750            | 664     | 2651        | 134          | 0      | 26        | 0      | 160   | 24              |
| 1988 | 556                   | 1000           | 821     | 3545        | 171          | 0      | 20        | 0      | 191   | 23              |
| 1989 | 877                   | 1250           | 1110    | 5660        | 259          | 0      | 10        | 0      | 269   | 24              |
| 1990 | 713                   | 1139           | 996     | 4822        | 130          | 0      | 19        | 0      | 149   | 15              |
| 1991 | 772                   | 1181           | 1074    | 5424        | 205          | 0      | 31        | 0      | 236   | 22              |
| 1992 | 964                   | 1300           | 1189    | 5808        | 216          | 0      | 21        | 0      | 237   | 20              |
| 1993 | 970                   | 1625           | 1437    | 6950        | 285          | 0      | 2         | 0      | 287   | 20              |
| 1994 | 1070                  | 1821           | 1667    | 7875        | 303          | 0      | 13        | 0      | 316   | 19              |
| 1995 | 1213                  | 1626           | 1456    | 7135        | 278          | 0      | 5         | 0      | 283   | 19              |
| 1996 | 1267                  | 1479           | 1309    | 6323        | 189          | 0      | 14        | 0      | 203   | 16              |
| 1997 | 1540                  | 1335           | 1179    | 5605        | 184          | 0      | 7         | 0      | 191   | 16              |
| 1998 | 1621                  | 1120           | 1008    | 4372        | 164          | 0      | 16        | 0      | 180   | 18              |
| 1999 | 1541                  | 1055           | 949     | 4063        | 157          | 0      | 26        | 0      | 183   | 19              |
| 2000 | 1489                  | 915            | 822     | 3812        | 111          | 0      | 26        | 0      | 137   | 17              |
| 2001 | 1456                  | 869            | 782     | 3775        | 170          | 0      | 24        | 0      | 194   | 25              |
| 2002 | 1775                  | 995            | 874     | 4020        | 143          | 0      | 18        | 0      | 161   | 18              |
| 2003 | 1585                  | 745            | 675     | 3189        | 150          | 0      | 32        | 0      | 182   | 27              |
| 2004 | 1896                  | 783            | 679     | 2988        | 119          | 0      | 33        | 0      | 152   | 22              |
| 2005 | 1498                  | 859            | 768     | 3189        | 193          | 0      | 23        | 0      | 216   | 28              |
| 2006 | 1724                  | 924            | 807     | 3726        | 190          | 0      | 29        | 0      | 219   | 27              |
| 2007 | 1506                  | 940            | 873     | 4350        | 233          | 0      | 13        | 0      | 246   | 28              |
| 2008 | 1756                  | 1015           | 940     | 4456        | 217          | 0      | 40        | 0      | 257   | 27              |

### *Summary Of Archery Deer Hunts (Draw Hunts)*

| Year | 1st Choice Applicants | Permits Issued | Hunters | Hunter Days | Deer Harvest |        |           |        |       | Percent Success |
|------|-----------------------|----------------|---------|-------------|--------------|--------|-----------|--------|-------|-----------------|
|      |                       |                |         |             | Mule Deer    |        | Whitetail |        | Total |                 |
|      |                       |                |         |             | Bucks        | A-less | Bucks     | A-less |       |                 |
| 2008 | 1167                  | 1912           | 1607    | 10373       | 225          | 0      | 0         | 0      | 225   | 14              |

# Deer Harvest Data

## Summary of Archery Deer Hunts (OTC Hunts)

| Year  | Tags Sold | Hunters | Hunter Days | DEER HARVEST |        |           |        |       | Percent Success |
|-------|-----------|---------|-------------|--------------|--------|-----------|--------|-------|-----------------|
|       |           |         |             | Mule Deer    |        | Whitetail |        | Total |                 |
|       |           |         |             | Buck         | A-less | Buck      | A-less |       |                 |
| 1952  | —         | 104     | —           | 21           | 0      | 0         | 0      | 21    | 20              |
| 1954  | —         | 156     | —           | 5            | 0      | 0         | 0      | 5     | 3               |
| 1955  | —         | 98      | —           | 12           | 0      | 0         | 0      | 12    | 12              |
| 1956  | —         | 670     | —           | 49           | 0      | 0         | 0      | 49    | 7               |
| 1957  | —         | —       | —           | 33           | 0      | 0         | 0      | 33    | —               |
| 1958  | 2736      | 2181    | 11736       | 175          | 226    | 1         | 1      | 403   | 19              |
| 1959  | 3451      | 3165    | 16292       | 143          | 224    | 0         | 8      | 375   | 12              |
| 1960  | 2349      | 2245    | 9517        | 82           | 93     | 2         | 6      | 183   | 8               |
| 1961  | 1695      | 1384    | 5518        | 15           | 20     | 5         | 2      | 42    | 3               |
| 1962  | 4625      | 4319    | 19768       | 141          | 172    | 47        | 44     | 404   | 9               |
| 1963  | 4567      | 4225    | 16922       | 88           | 91     | 18        | 17     | 214   | 5               |
| 1964  | 3596      | 3246    | 12809       | 50           | 63     | 13        | 15     | 141   | 4               |
| 1965  | 3835      | 3798    | —           | —            | —      | —         | —      | 122   | 3               |
| 1966  | 3596      | 3387    | —           | —            | —      | —         | —      | 150   | 4               |
| 1967  | 4679      | 4390    | —           | —            | —      | —         | —      | 206   | 5               |
| 1968  | 4510      | 4216    | —           | —            | —      | —         | —      | 176   | 4               |
| 1969  | 5107      | 4664    | —           | —            | —      | —         | —      | 208   | 5               |
| 1970  | 5855      | 5275    | —           | —            | —      | —         | —      | 228   | 4               |
| 1971  | 7261      | 6412    | —           | —            | —      | —         | —      | 285   | 4               |
| 1972  | —         | 6832    | —           | —            | —      | —         | —      | 315   | 5               |
| 1973  | —         | 7000    | —           | —            | —      | —         | —      | 310   | 4               |
| 1974  | —         | 7420    | —           | —            | —      | —         | —      | 419   | 6               |
| 1975  | —         | 7163    | —           | —            | —      | —         | —      | 346   | 4               |
| 1976  | —         | 7517    | —           | —            | —      | —         | —      | 373   | 5               |
| 1977  | —         | 9038    | —           | —            | —      | —         | —      | 416   | 5               |
| 1978  | —         | 7313    | —           | —            | —      | —         | —      | 381   | 5               |
| 1979  | —         | 8425    | —           | —            | —      | —         | —      | 620   | 7               |
| 1980  | —         | 7157    | —           | —            | —      | —         | —      | 237   | 3               |
| 1981  | 19814     | 12862   | 77011       | 327          | 40     | 88        | 16     | 471   | 4               |
| 1982  | 15109     | 10212   | 63099       | 287          | 51     | 60        | 0      | 398   | 4               |
| 1983  | 11934     | 9689    | 63071       | 248          | 61     | 71        | 0      | 380   | 4               |
| 1984  | 12628     | 10619   | 70553       | 417          | 35     | 65        | 0      | 517   | 5               |
| 1985  | 14249     | 12302   | 85328       | 534          | 71     | 138       | 0      | 743   | 6               |
| 1986  | 16554     | 14397   | 104288      | 742          | 130    | 94        | 0      | 966   | 7               |
| 1987  | 18666     | 16163   | 111826      | 748          | 58     | 115       | 0      | 921   | 6               |
| 1988  | 20883     | 17909   | 119793      | 704          | 223    | 108       | 0      | 1035  | 6               |
| 1989  | 22399     | 19423   | 125848      | 598          | 201    | 189       | 0      | 988   | 5               |
| 1990  | 22398     | 19325   | 125940      | 674          | 35     | 100       | 0      | 809   | 4               |
| 1991  | 20324     | 18051   | 126545      | 773          | 0      | 129       | 0      | 902   | 5               |
| 1992  | 18883     | 17505   | 120123      | 691          | 0      | 100       | 0      | 791   | 5               |
| 1993  | 21580     | 19559   | 133174      | 1084         | 63     | 136       | 27     | 1310  | 7               |
| 1994  | 23445     | 20646   | 144881      | 942          | 105    | 212       | 39     | 1298  | 6               |
| 1995  | 23329     | 20383   | 149129      | 916          | 97     | 166       | 64     | 1243  | 6               |
| 1996  | 23568     | 20698   | 143789      | 996          | 83     | 145       | 36     | 1260  | 6               |
| 1997  | 23166     | 19939   | 148077      | 691          | 30     | 138       | 18     | 877   | 4               |
| 1998  | 23022     | 19375   | 146101      | 1050         | 63     | 166       | 38     | 1317  | 7               |
| 1999  | 24293     | 20738   | 158187      | 1032         | 27     | 227       | 28     | 1314  | 6               |
| 2000  | 25338     | 21148   | 155575      | 1209         | 55     | 177       | 37     | 1478  | 7               |
| 2001  | 23783     | 20408   | 148346      | 827          | 12     | 194       | 25     | 1058  | 5               |
| 2002  | 23082     | 19595   | 151816      | 929          | 7      | 247       | 37     | 1220  | 6               |
| 2003  | 22447     | 18512   | 139107      | 621          | 5      | 291       | 20     | 937   | 5               |
| 2004  | 22675     | 18305   | 138856      | 779          | 0      | 262       | 0      | 1041  | 6               |
| 2005  | 22949     | 18824   | 14847       | 803          | 0      | 377       | 0      | 1180  | 6               |
| 2006  | 24538     | 20352   | 153887      | 939          | 0      | 410       | 0      | 1349  | 7               |
| 2007  | 23907     | 19265   | 157895      | 870          | 0      | 393       | 0      | 1263  | 7               |
| 2008¹ | 19653     | 15737   | 116631      | 549          | 0      | 421       | 0      | 970   | 6               |

<sup>1</sup>2008 data is preliminary.

# Deer Hunt Data

## 5-Year: 2004-2008 Harvest

| Unit    | Year | Hunt Type | Dates        | Permits Authorized | 1st Choice Applicants | Permits Issued | Draw Odds | Hunters | Hunter Days | Harvest |          |          |          |       | Hunt Success |
|---------|------|-----------|--------------|--------------------|-----------------------|----------------|-----------|---------|-------------|---------|----------|----------|----------|-------|--------------|
|         |      |           |              |                    |                       |                |           |         |             | MD-Buck | MD-Aless | WT- Buck | WT-Aless | Total |              |
| GENERAL |      |           |              |                    |                       |                |           |         |             |         |          |          |          |       |              |
| 1       | 2004 | AA        | 10/29/-11/07 | 175                | 1428                  | 175            | 11.4      | 161     | 695         | 34      | 0        | 2        | 0        | 36    | 22           |
| 1       | 2005 | AA        | 10/28/-11/06 | 200                | 1317                  | 200            | 13.7      | 171     | 826         | 38      | 0        | 0        | 0        | 38    | 22           |
| 1       | 2006 | AA        | 11/10/-11/19 | 200                | 1435                  | 200            | 12.2      | 185     | 830         | 33      | 0        | 5        | 0        | 38    | 21           |
| 1       | 2007 | AA        | 11/09/-11/18 | 200                | 817                   | 200            | 21.8      | 181     | 831         | 17      | 0        | 0        | 0        | 17    | 9            |
| 1       | 2008 | AA        | 10/24/-11/02 | 260                | 628                   | 260            | 33.3      | 227     | 964         | 59      | 0        | 2        | 0        | 61    | 27           |
| 2       | 2004 | AA        | 10/29/-11/07 | 80                 | 531                   | 80             | 13.6      | 80      | 331         | 49      | 0        | 0        | 0        | 49    | 61           |
| 2       | 2005 | AA        | 10/28/-11/06 | 90                 | 587                   | 90             | 12.6      | 84      | 523         | 17      | 0        | 0        | 0        | 17    | 20           |
| 2       | 2006 | AA        | 11/10/-11/19 | 90                 | 551                   | 90             | 14.0      | 86      | 464         | 14      | 0        | 0        | 0        | 14    | 16           |
| 2       | 2007 | AA        | 11/09/-11/18 | 80                 | 355                   | 80             | 19.4      | 77      | 387         | 37      | 0        | 0        | 0        | 37    | 48           |
| 2       | 2008 | AA        | 10/31/-11/09 | 80                 | 354                   | 80             | 17.8      | 67      | 341         | 27      | 0        | 0        | 0        | 27    | 40           |
| 3A/3C   | 2004 | AA        | 10/29/-11/07 | 125                | 584                   | 125            | 19.0      | 109     | 550         | 18      | 0        | 0        | 0        | 18    | 17           |
| 3A/3C   | 2005 | AA        | 10/28/-11/06 | 125                | 704                   | 125            | 15.8      | 112     | 487         | 34      | 0        | 0        | 0        | 34    | 30           |
| 3A/3C   | 2006 | AA        | 11/10/-11/19 | 150                | 971                   | 148            | 13.4      | 138     | 743         | 46      | 0        | 0        | 0        | 46    | 33           |
| 3A/3C   | 2007 | AA        | 11/09/-11/18 | 200                | 964                   | 200            | 17.3      | 191     | 883         | 68      | 0        | 0        | 0        | 68    | 36           |
| 3A/3C   | 2008 | AA        | 10/31/-11/09 | 300                | 1001                  | 300            | 25.5      | 296     | 1331        | 123     | 0        | 0        | 0        | 123   | 42           |
| 4       | 2004 | AA        | 10/29/-11/07 | 150                | 946                   | 150            | 13.5      | 143     | 739         | 17      | 0        | 2        | 0        | 19    | 13           |
| 4       | 2005 | AA        | 10/28/-11/06 | 150                | 760                   | 150            | 15.5      | 140     | 695         | 14      | 0        | 0        | 0        | 14    | 10           |
| 4       | 2006 | AA        | 11/10/-11/19 | 150                | 775                   | 150            | 16.6      | 134     | 756         | 16      | 0        | 0        | 0        | 16    | 12           |
| 4       | 2007 | AA        | 11/09/-11/18 | 150                | 414                   | 150            | 20.8      | 139     | 739         | 18      | 0        | 2        | 0        | 20    | 14           |
| 4       | 2008 | AA        | 10/31/-11/09 | 150                | 386                   | 150            | 29.5      | 139     | 823         | 24      | 0        | 0        | 0        | 24    | 17           |
| 5       | 2004 | AA        | 10/29/-11/07 | 350                | 2619                  | 350            | 12.1      | 322     | 1549        | 70      | 0        | 0        | 0        | 70    | 22           |
| 5       | 2005 | AA        | 10/28/-11/06 | 350                | 2282                  | 350            | 14.1      | 342     | 1521        | 72      | 0        | 6        | 0        | 78    | 23           |
| 5       | 2006 | AA        | 10/27/-11/05 | 450                | 2816                  | 450            | 13.0      | 419     | 1885        | 93      | 0        | 12       | 0        | 105   | 25           |
| 5       | 2007 | AA        | 10/26/-11/04 | 450                | 1866                  | 450            | 20.8      | 432     | 2080        | 69      | 0        | 10       | 0        | 79    | 18           |
| 5       | 2008 | AA        | 10/31/-11/09 | 400                | 1553                  | 400            | 23.2      | 376     | 1912        | 59      | 0        | 0        | 0        | 59    | 16           |
| 6A      | 2004 | MD        | 10/29/-11/01 | 275                | 2556                  | 275            | 10.1      | 260     | 1096        | 65      | 0        | 0        | 0        | 65    | 25           |
| 6A      | 2005 | MD        | 10/28/-11/06 | 275                | 2270                  | 275            | 10.8      | 259     | 1165        | 71      | 0        | 0        | 0        | 71    | 27           |
| 6A      | 2006 | MD        | 10/27/-11/05 | 275                | 2419                  | 275            | 10.7      | 259     | 1162        | 88      | 0        | 0        | 0        | 88    | 34           |
| 6A      | 2007 | MD        | 10/26/-11/04 | 325                | 1992                  | 325            | 14.8      | 311     | 1506        | 74      | 0        | 0        | 0        | 74    | 24           |
| 6A      | 2008 | MD        | 10/31/-11/06 | 400                | 1846                  | 400            | 20.7      | 366     | 1495        | 76      | 0        | 0        | 0        | 76    | 21           |
| 6A      | 2005 | WT        | 10/28/-10/31 | 175                | 200                   | 175            | 48.0      | 145     | 498         | 0       | 0        | 9        | 0        | 9     | 6            |
| 6A E    | 2006 | WT        | 10/27/-11/05 | 400                | 317                   | 400            | 56.5      | 362     | 1612        | 0       | 0        | 60       | 0        | 60    | 17           |
| 6A E    | 2007 | WT        | 10/26/-10/31 | 250                | 170                   | 250            | 74.7      | 233     | 907         | 0       | 0        | 31       | 0        | 31    | 13           |
| 6A E    | 2008 | WT        | 10/24/-10/30 | 200                | 135                   | 200            | 59.3      | 187     | 789         | 0       | 0        | 49       | 0        | 49    | 26           |
| 6A M    | 2007 | WT        | 11/02/-11/11 | 200                | 76                    | 200            | 82.9      | 181     | 821         | 0       | 0        | 36       | 0        | 36    | 20           |
| 6A M    | 2008 | WT        | 11/07/-11/13 | 200                | 168                   | 200            | 56.0      | 198     | 819         | 0       | 0        | 34       | 0        | 34    | 17           |
| 6A L    | 2004 | WT        | 12/17/-12/31 | 250                | 783                   | 250            | 23.6      | 233     | 1174        | 0       | 0        | 66       | 0        | 66    | 28           |
| 6A L    | 2005 | WT        | 12/16/-12/31 | 150                | 565                   | 150            | 15.9      | 145     | 876         | 0       | 0        | 37       | 0        | 37    | 26           |
| 6A L    | 2006 | WT        | 12/15/-12/31 | 50                 | 465                   | 50             | 8.6       | 44      | 286         | 0       | 0        | 16       | 0        | 16    | 36           |
| 6A L    | 2007 | WT        | 12/14/-12/31 | 50                 | 344                   | 50             | 10.2      | 44      | 262         | 0       | 0        | 21       | 0        | 21    | 48           |
| 6A L    | 2008 | WT        | 12/12/-12/31 | 75                 | 482                   | 75             | 12.9      | 69      | 444         | 0       | 0        | 42       | 0        | 42    | 61           |
| 6B      | 2004 | AA        | 11/05/-11/14 | 150                | 395                   | 150            | 22.5      | 132     | 506         | 29      | 0        | 7        | 0        | 36    | 27           |
| 6B      | 2005 | AA        | 11/04/-11/13 | 150                | 379                   | 150            | 25.6      | 136     | 652         | 8       | 0        | 0        | 0        | 8     | 6            |
| 6B      | 2006 | MD        | 11/10/-11/19 | 190                | 274                   | 190            | 33.2      | 180     | 823         | 48      | 0        | 0        | 0        | 48    | 27           |
| 6B      | 2007 | MD        | 11/09/-11/18 | 250                | 387                   | 250            | 40.3      | 240     | 1185        | 36      | 0        | 0        | 0        | 36    | 15           |
| 6B      | 2008 | MD        | 11/07/-11/13 | 275                | 332                   | 275            | 48.5      | 250     | 1091        | 25      | 0        | 0        | 0        | 25    | 10           |
| 6B E    | 2006 | WT        | 10/27/-11/05 | 20                 | 12                    | 20             | 75.0      | 20      | 90          | 0       | 0        | 0        | 0        | 0     | 0            |
| 6B E    | 2007 | WT        | 10/26/-11/04 | 20                 | 22                    | 20             | 54.5      | 20      | 87          | 0       | 0        | 3        | 0        | 3     | 15           |
| 6B E    | 2008 | WT        | 10/24/-10/30 | 55                 | 21                    | 55             | 81.0      | 49      | 206         | 0       | 0        | 8        | 0        | 8     | 16           |
| 6B/8    | 2004 | WT        | 12/17/-12/31 | 50                 | 86                    | 50             | 34.9      | 48      | 302         | 0       | 0        | 13       | 0        | 13    | 27           |
| 6B/8    | 2005 | WT        | 12/16/-12/31 | 50                 | 78                    | 51             | 35.9      | 51      | 299         | 0       | 0        | 15       | 0        | 15    | 29           |
| 6B/8 L  | 2006 | WT        | 12/15/-12/31 | 50                 | 112                   | 50             | 21.4      | 46      | 254         | 0       | 0        | 21       | 0        | 21    | 46           |
| 6B/8 L  | 2007 | WT        | 12/14/-12/31 | 50                 | 166                   | 50             | 15.7      | 50      | 352         | 0       | 0        | 21       | 0        | 21    | 42           |
| 6B/8 L  | 2008 | WT        | 12/12/-12/31 | 25                 | 125                   | 25             | 10.4      | 23      | 102         | 0       | 0        | 12       | 0        | 12    | 52           |
| 7       | 2004 | AA        | 10/29/-11/07 | 700                | 2380                  | 700            | 22.1      | 646     | 2771        | 70      | 0        | 0        | 0        | 70    | 11           |
| 7       | 2005 | AA        | 10/28/-11/06 | 700                | 1792                  | 700            | 27.1      | 652     | 2593        | 155     | 0        | 2        | 0        | 157   | 24           |
| 7       | 2006 | AA        | 10/27/-11/05 | 800                | 2562                  | 798            | 23.0      | 723     | 3093        | 131     | 0        | 2        | 0        | 133   | 18           |
| 7       | 2007 | AA        | 10/26/-11/04 | 800                | 1644                  | 800            | 35.2      | 759     | 3338        | 187     | 0        | 11       | 0        | 198   | 26           |
| 7       | 2008 | AA        | 10/31/-11/09 | 800                | 1492                  | 800            | 40.8      | 743     | 3571        | 138     | 0        | 0        | 0        | 138   | 19           |
| 8       | 2004 | AA        | 10/29/-11/07 | 500                | 2231                  | 500            | 19.4      | 453     | 2018        | 91      | 0        | 2        | 0        | 93    | 21           |
| 8       | 2005 | AA        | 10/28/-11/06 | 500                | 2165                  | 500            | 20.2      | 464     | 1996        | 96      | 0        | 9        | 0        | 105   | 23           |
| 8       | 2006 | MD        | 10/27/-11/05 | 500                | 2114                  | 500            | 20.3      | 466     | 2034        | 169     | 0        | 0        | 0        | 169   | 36           |

AA = Any Antlered Deer MD = Mule Deer WT = Whitetail Deer ALS = Antlerless CN = Camp Navajo FTHU = Fort Huachuca,  
C = CHAMP Hunt; in the unit column E = early or 1st season M = 2nd season T = 3rd season L = late or 4th season.



# Deer Hunt Data

## 5-Year: 2004-2008 Harvest

| Unit      | Year | Hunt Type | Dates        | Permits Authorized | 1st Choice Applicants | Permits Issued | Draw Odds | Hunters | Hunter Days | Harvest |          |          |          |       | Hunt Success |
|-----------|------|-----------|--------------|--------------------|-----------------------|----------------|-----------|---------|-------------|---------|----------|----------|----------|-------|--------------|
|           |      |           |              |                    |                       |                |           |         |             | MD-Buck | MD-Aless | WT- Buck | WT-Aless | Total |              |
| GENERAL   |      |           |              |                    |                       |                |           |         |             |         |          |          |          |       |              |
| 8         | 2007 | MD        | 10/26/-11/04 | 600                | 1861                  | 600            | 29.5      | 588     | 2943        | 135     | 0        | 0        | 0        | 135   | 23           |
| 8         | 2008 | MD        | 10/31/-11/06 | 600                | 1421                  | 599            | 36.4      | 552     | 2450        | 78      | 0        | 0        | 0        | 78    | 14           |
| 8 E       | 2006 | WT        | 10/27/-11/05 | 50                 | 34                    | 50             | 70.6      | 46      | 209         | 0       | 0        | 2        | 0        | 2     | 4            |
| 8 E       | 2007 | WT        | 10/26/-11/04 | 50                 | 46                    | 50             | 60.9      | 44      | 179         | 0       | 0        | 4        | 0        | 4     | 9            |
| 8 E       | 2008 | WT        | 10/24/-11/02 | 75                 | 35                    | 75             | 91.4      | 68      | 345         | 0       | 0        | 15       | 0        | 15    | 22           |
| 9 E       | 2004 | AA        | 10/29/-11/07 | 650                | 843                   | 650            | 43.7      | 598     | 2774        | 137     | 0        | 2        | 0        | 139   | 23           |
| 9 E       | 2005 | AA        | 10/28/-11/06 | 650                | 1148                  | 650            | 37.2      | 615     | 2986        | 132     | 0        | 4        | 0        | 136   | 22           |
| 9 E       | 2006 | AA        | 10/27/-11/05 | 400                | 979                   | 400            | 29.0      | 372     | 1751        | 144     | 0        | 2        | 0        | 146   | 39           |
| 9 E       | 2007 | AA        | 10/26/-11/04 | 400                | 986                   | 400            | 30.3      | 378     | 1844        | 119     | 0        | 0        | 0        | 119   | 31           |
| 9 E       | 2008 | AA        | 10/31/-11/09 | 400                | 737                   | 400            | 42.3      | 367     | 1669        | 109     | 0        | 0        | 0        | 109   | 30           |
| 10        | 2004 | AA        | 10/29/-11/14 | 700                | 2286                  | 700            | 22.3      | 647     | 3691        | 53      | 0        | 0        | 0        | 53    | 8            |
| 10        | 2005 | AA        | 10/28/-11/13 | 700                | 1563                  | 700            | 29.9      | 651     | 3644        | 92      | 0        | 2        | 0        | 94    | 14           |
| 10        | 2006 | AA        | 10/27/-11/05 | 725                | 1756                  | 721            | 29.3      | 678     | 3315        | 134     | 0        | 4        | 0        | 138   | 20           |
| 10        | 2007 | AA        | 10/26/-11/04 | 725                | 1128                  | 725            | 42.6      | 691     | 3694        | 105     | 0        | 0        | 0        | 105   | 15           |
| 10        | 2008 | AA        | 10/24/-11/02 | 725                | 927                   | 725            | 56.4      | 683     | 3472        | 91      | 0        | 0        | 0        | 91    | 13           |
| 12A Champ | 2008 | AA        | 10/10/-10/16 | 10                 | 31                    | 10             | 29.0      | 7       | 24          | 7       | 0        | 0        | 0        | 7     | 100          |
| 12AE E    | 2004 | AA        | 10/29/-11/01 | 200                | 1539                  | 204            | 10.1      | 190     | 958         | 83      | 0        | 0        | 0        | 83    | 44           |
| 12AE E    | 2005 | AA        | 10/28/-11/06 | 200                | 1207                  | 200            | 10.4      | 194     | 1017        | 79      | 0        | 0        | 0        | 79    | 41           |
| 12AE E    | 2006 | AA        | 10/27/-11/05 | 150                | 1139                  | 150            | 8.8       | 146     | 785         | 85      | 0        | 0        | 0        | 85    | 58           |
| 12AE E    | 2007 | AA        | 10/26/-11/04 | 175                | 882                   | 175            | 13.3      | 171     | 870         | 76      | 0        | 0        | 0        | 76    | 44           |
| 12AE E    | 2008 | AA        | 10/31/-11/09 | 150                | 630                   | 150            | 15.4      | 134     | 650         | 76      | 0        | 0        | 0        | 76    | 57           |
| 12AE L    | 2004 | AA        | 11/19/-11/28 | 50                 | 2545                  | 62             | 2.2       | 57      | 347         | 30      | 0        | 0        | 0        | 30    | 53           |
| 12AE L    | 2005 | AA        | 11/18/-11/27 | 50                 | 1845                  | 50             | 2.2       | 49      | 304         | 28      | 0        | 0        | 0        | 28    | 57           |
| 12AE L    | 2006 | AA        | 11/24/-12/03 | 50                 | 2068                  | 50             | 2.3       | 50      | 292         | 40      | 0        | 0        | 0        | 40    | 80           |
| 12AE L    | 2007 | AA        | 11/23/-12/02 | 50                 | 1764                  | 50             | 2.8       | 50      | 224         | 42      | 0        | 0        | 0        | 42    | 84           |
| 12AE L    | 2008 | AA        | 11/21/-11/30 | 50                 | 1319                  | 50             | 3.3       | 46      | 217         | 37      | 0        | 0        | 0        | 37    | 80           |
| 12AW E    | 2004 | AA        | 10/29/-11/07 | 500                | 4803                  | 500            | 8.6       | 449     | 1981        | 214     | 0        | 0        | 0        | 214   | 48           |
| 12AW E    | 2005 | AA        | 10/28/-11/06 | 1000               | 5898                  | 1000           | 13.2      | 948     | 4685        | 428     | 0        | 0        | 0        | 428   | 45           |
| 12AW E    | 2006 | AA        | 10/27/-11/05 | 500                | 4716                  | 500            | 7.9       | 470     | 2254        | 241     | 0        | 0        | 0        | 241   | 51           |
| 12AW E    | 2007 | AA        | 10/26/-11/04 | 650                | 3707                  | 646            | 12.8      | 614     | 2930        | 339     | 0        | 0        | 0        | 339   | 55           |
| 12AW E    | 2008 | AA        | 10/31/-11/09 | 850                | 3258                  | 850            | 18.9      | 796     | 3846        | 427     | 0        | 0        | 0        | 427   | 54           |
| 12AW L    | 2004 | AA        | 11/19/-11/28 | 125                | 3552                  | 154            | 3.3       | 144     | 723         | 89      | 0        | 0        | 0        | 89    | 62           |
| 12AW L    | 2005 | AA        | 11/18/-11/27 | 175                | 2852                  | 175            | 4.0       | 170     | 1073        | 105     | 0        | 0        | 0        | 105   | 62           |
| 12AW L    | 2006 | AA        | 11/24/-12/03 | 175                | 4125                  | 175            | 3.4       | 169     | 1003        | 118     | 0        | 0        | 0        | 118   | 70           |
| 12AW L    | 2007 | AA        | 11/23/-12/02 | 175                | 3924                  | 175            | 3.5       | 173     | 919         | 125     | 0        | 0        | 0        | 125   | 72           |
| 12AW L    | 2008 | AA        | 11/21/-11/30 | 175                | 2980                  | 177            | 4.6       | 170     | 1094        | 98      | 0        | 0        | 0        | 98    | 58           |
| 12B E     | 2004 | AA        | 10/29/-11/07 | 25                 | 357                   | 25             | 4.5       | 25      | 87          | 20      | 0        | 0        | 0        | 20    | 80           |
| 12B E     | 2005 | AA        | 10/28/-11/06 | 25                 | 332                   | 25             | 4.2       | 24      | 106         | 16      | 0        | 0        | 0        | 16    | 67           |
| 12B E     | 2006 | AA        | 10/27/-11/05 | 25                 | 384                   | 25             | 3.9       | 22      | 118         | 12      | 0        | 0        | 0        | 12    | 55           |
| 12B E     | 2007 | AA        | 10/26/-11/04 | 25                 | 184                   | 25             | 10.9      | 24      | 119         | 18      | 0        | 0        | 0        | 18    | 75           |
| 12B E     | 2008 | AA        | 10/31/-11/09 | 25                 | 212                   | 25             | 8.5       | 24      | 143         | 14      | 0        | 0        | 0        | 14    | 58           |
| 12B L     | 2004 | AA        | 11/19/-11/28 | 10                 | 1037                  | 12             | 1.1       | 12      | 66          | 9       | 0        | 0        | 0        | 9     | 75           |
| 12B L     | 2005 | AA        | 11/18/-11/27 | 65                 | 1961                  | 65             | 2.8       | 62      | 314         | 46      | 0        | 0        | 0        | 46    | 74           |
| 12B L     | 2006 | AA        | 11/24/-12/03 | 75                 | 1991                  | 75             | 2.7       | 75      | 375         | 51      | 0        | 0        | 0        | 51    | 68           |
| 12B L     | 2007 | AA        | 11/23/-12/02 | 75                 | 1584                  | 75             | 4.2       | 75      | 380         | 62      | 0        | 0        | 0        | 62    | 83           |
| 12B L     | 2008 | AA        | 11/21/-11/30 | 75                 | 1390                  | 75             | 4.7       | 73      | 389         | 51      | 0        | 0        | 0        | 51    | 70           |
| 12BW      | 2004 | AA        | 11/19/-11/28 | 65                 | 1493                  | 87             | 4.2       | 84      | 460         | 55      | 0        | 0        | 0        | 55    | 65           |
| 12BW E    | 2004 | AA        | 10/29/-11/07 | 100                | 395                   | 114            | 16.5      | 106     | 476         | 58      | 0        | 0        | 0        | 58    | 55           |
| 12BW E    | 2005 | AA        | 10/28/-11/06 | 125                | 300                   | 125            | 14.3      | 120     | 658         | 81      | 0        | 0        | 0        | 81    | 68           |
| 12BW E    | 2006 | AA        | 10/27/-11/05 | 185                | 468                   | 185            | 16.5      | 179     | 815         | 120     | 0        | 0        | 0        | 120   | 67           |
| 12BW E    | 2007 | AA        | 10/26/-11/04 | 175                | 350                   | 175            | 24.9      | 169     | 750         | 120     | 0        | 0        | 0        | 120   | 71           |
| 12BW E    | 2008 | AA        | 10/31/-11/09 | 175                | 466                   | 175            | 17.6      | 166     | 811         | 122     | 0        | 0        | 0        | 122   | 73           |
| 13A       | 2004 | AA        | 11/12/-11/21 | 40                 | 1217                  | 53             | 3.0       | 53      | 322         | 27      | 0        | 0        | 0        | 27    | 51           |
| 13A       | 2005 | AA        | 11/11/-11/20 | 30                 | 953                   | 30             | 1.0       | 29      | 170         | 21      | 0        | 0        | 0        | 21    | 72           |
| 13A       | 2006 | AA        | 11/17/-11/26 | 40                 | 1263                  | 40             | 2.7       | 40      | 189         | 36      | 0        | 0        | 0        | 36    | 90           |
| 13A       | 2007 | AA        | 11/16/-11/25 | 55                 | 1253                  | 55             | 3.4       | 52      | 387         | 37      | 0        | 0        | 0        | 37    | 71           |
| 13A       | 2008 | AA        | 11/14/-11/23 | 45                 | 977                   | 45             | 3.0       | 43      | 223         | 36      | 0        | 0        | 0        | 36    | 84           |
| 13B       | 2004 | AA        | 11/05/-11/14 | 55                 | 6997                  | 72             | 1.0       | 68      | 432         | 41      | 0        | 0        | 0        | 41    | 60           |
| 13B       | 2005 | AA        | 11/04/-11/13 | 60                 | 5068                  | 60             | 1.2       | 60      | 434         | 39      | 0        | 0        | 0        | 39    | 65           |
| 13B       | 2006 | AA        | 11/10/-11/19 | 75                 | 5591                  | 75             | 1.3       | 70      | 454         | 50      | 0        | 0        | 0        | 50    | 71           |
| 13B       | 2007 | AA        | 11/09/-11/18 | 85                 | 3280                  | 85             | 2.6       | 85      | 649         | 40      | 0        | 0        | 0        | 40    | 47           |
| 13B       | 2008 | AA        | 11/07/-11/16 | 45                 | 2987                  | 45             | 1.5       | 45      | 244         | 32      | 0        | 0        | 0        | 32    | 71           |

AA = Any Antlered Deer MD = Mule Deer WT = Whitetail Deer ALS = Antlerless CN = Camp Navajo FTHU = Fort Huachuca,  
C = CHAMP Hunt; in the unit column E = early or 1st season M = 2nd season T = 3rd season L = late or 4th season.

# Deer Hunt Data

## 5-Year: 2004-2008 Harvest

| Unit    | Year | Hunt Type | Dates        | Permits Authorized | 1st Choice Applicants | Permits Issued | Draw Odds | Hunters | Hunter Days | Harvest |          |          |          |       | Hunt Success |
|---------|------|-----------|--------------|--------------------|-----------------------|----------------|-----------|---------|-------------|---------|----------|----------|----------|-------|--------------|
|         |      |           |              |                    |                       |                |           |         |             | MD-Buck | MD-Aless | WT- Buck | WT-Aless | Total |              |
| GENERAL |      |           |              |                    |                       |                |           |         |             |         |          |          |          |       |              |
| 16A     | 2004 | AA        | 10/29/-11/07 | 600                | 712                   | 600            | 58.1      | 540     | 2474        | 89      | 0        | 0        | 0        | 89    | 16           |
| 16A     | 2005 | AA        | 10/28/-11/06 | 600                | 789                   | 600            | 57.0      | 535     | 2488        | 98      | 0        | 0        | 0        | 98    | 18           |
| 16A     | 2006 | AA        | 10/27/-11/05 | 600                | 757                   | 598            | 59.6      | 561     | 2674        | 127     | 0        | 0        | 0        | 127   | 23           |
| 16A     | 2007 | AA        | 10/26/-11/04 | 650                | 558                   | 650            | 88.0      | 597     | 2845        | 127     | 0        | 0        | 0        | 127   | 21           |
| 16A     | 2008 | AA        | 10/24/-11/02 | 650                | 485                   | 650            | 100.0     | 576     | 2699        | 105     | 0        | 0        | 0        | 105   | 18           |
| 17A     | 2004 | AA        | 10/29/-11/07 | 375                | 687                   | 375            | 42.4      | 339     | 1484        | 44      | 0        | 0        | 0        | 44    | 13           |
| 17A     | 2005 | AA        | 10/28/-11/06 | 375                | 687                   | 375            | 44.0      | 337     | 1628        | 42      | 0        | 0        | 0        | 42    | 12           |
| 17A     | 2006 | AA        | 10/27/-11/05 | 375                | 675                   | 375            | 40.0      | 343     | 1635        | 80      | 0        | 0        | 0        | 80    | 23           |
| 17A     | 2007 | AA        | 10/26/-11/04 | 375                | 634                   | 371            | 42.9      | 341     | 1697        | 61      | 0        | 0        | 0        | 61    | 18           |
| 17A     | 2008 | AA        | 10/24/-11/02 | 350                | 585                   | 350            | 49.4      | 326     | 1424        | 74      | 0        | 0        | 0        | 74    | 23           |
| 17B     | 2004 | AA        | 10/29/-11/07 | 400                | 803                   | 400            | 35.1      | 364     | 1526        | 60      | 0        | 0        | 0        | 60    | 16           |
| 17B     | 2005 | AA        | 10/28/-11/06 | 400                | 793                   | 400            | 39.1      | 385     | 1574        | 71      | 0        | 0        | 0        | 71    | 18           |
| 17B     | 2006 | AA        | 10/27/-11/05 | 400                | 847                   | 400            | 35.1      | 357     | 1443        | 78      | 0        | 0        | 0        | 78    | 22           |
| 17B     | 2007 | AA        | 10/26/-11/04 | 400                | 550                   | 400            | 53.8      | 366     | 1520        | 67      | 0        | 0        | 0        | 67    | 18           |
| 17B     | 2008 | AA        | 10/24/-11/02 | 400                | 534                   | 400            | 58.1      | 389     | 1709        | 77      | 0        | 0        | 0        | 77    | 20           |
| 18A     | 2004 | AA        | 10/29/-11/14 | 500                | 539                   | 500            | 56.6      | 424     | 2367        | 55      | 0        | 0        | 0        | 55    | 13           |
| 18A     | 2005 | AA        | 10/28/-11/13 | 500                | 407                   | 500            | 66.6      | 466     | 2933        | 101     | 0        | 0        | 0        | 101   | 22           |
| 18A     | 2006 | AA        | 10/27/-11/05 | 600                | 592                   | 600            | 63.3      | 541     | 2658        | 96      | 0        | 0        | 0        | 96    | 18           |
| 18A     | 2007 | AA        | 10/26/-11/04 | 600                | 421                   | 600            | 90.7      | 554     | 2859        | 95      | 0        | 0        | 0        | 95    | 17           |
| 18A     | 2008 | AA        | 10/24/-11/02 | 600                | 439                   | 600            | 98.6      | 547     | 2921        | 117     | 0        | 0        | 0        | 117   | 21           |
| 18B     | 2004 | AA        | 10/29/-11/14 | 500                | 797                   | 500            | 43.5      | 438     | 2080        | 73      | 0        | 0        | 0        | 73    | 17           |
| 18B     | 2005 | AA        | 10/28/-11/13 | 500                | 651                   | 500            | 54.4      | 443     | 2206        | 97      | 0        | 0        | 0        | 97    | 22           |
| 18B     | 2006 | AA        | 10/27/-11/05 | 550                | 886                   | 549            | 46.4      | 507     | 2109        | 153     | 0        | 0        | 0        | 153   | 30           |
| 18B     | 2007 | AA        | 10/26/-11/04 | 600                | 712                   | 600            | 62.9      | 574     | 2541        | 123     | 0        | 0        | 0        | 123   | 21           |
| 18B     | 2008 | AA        | 10/24/-11/02 | 650                | 593                   | 650            | 87.5      | 603     | 2569        | 168     | 0        | 0        | 0        | 168   | 28           |
| 19A     | 2004 | AA        | 10/29/-11/07 | 425                | 880                   | 425            | 31.8      | 402     | 1779        | 81      | 0        | 0        | 0        | 81    | 20           |
| 19A     | 2005 | AA        | 10/28/-11/06 | 350                | 848                   | 350            | 29.1      | 327     | 1482        | 68      | 0        | 5        | 0        | 73    | 22           |
| 19A     | 2006 | AA        | 10/27/-11/05 | 400                | 893                   | 400            | 33.6      | 387     | 1604        | 139     | 0        | 4        | 0        | 143   | 37           |
| 19A     | 2007 | AA        | 10/26/-11/04 | 450                | 705                   | 450            | 45.4      | 431     | 1744        | 143     | 0        | 4        | 0        | 147   | 34           |
| 19A     | 2008 | AA        | 10/24/-11/02 | 450                | 789                   | 450            | 47.3      | 437     | 1770        | 148     | 0        | 7        | 0        | 155   | 35           |
| 19B     | 2004 | AA        | 10/29/-11/14 | 250                | 366                   | 250            | 40.2      | 224     | 1171        | 31      | 0        | 0        | 0        | 31    | 14           |
| 19B     | 2005 | AA        | 10/28/-11/13 | 250                | 285                   | 250            | 44.9      | 241     | 1382        | 26      | 0        | 0        | 0        | 26    | 11           |
| 19B     | 2006 | AA        | 10/27/-11/05 | 200                | 224                   | 199            | 52.7      | 183     | 872         | 49      | 0        | 0        | 0        | 49    | 27           |
| 19B     | 2007 | AA        | 10/26/-11/04 | 250                | 269                   | 250            | 59.9      | 230     | 1126        | 46      | 0        | 0        | 0        | 46    | 20           |
| 19B     | 2008 | AA        | 10/24/-11/02 | 300                | 223                   | 300            | 81.6      | 283     | 1384        | 53      | 0        | 0        | 0        | 53    | 19           |
| 20A     | 2004 | AA        | 10/29/-11/14 | 550                | 1836                  | 550            | 25.5      | 519     | 2519        | 126     | 0        | 0        | 0        | 126   | 24           |
| 20A     | 2005 | AA        | 10/28/-11/13 | 550                | 1729                  | 550            | 28.1      | 502     | 2475        | 91      | 0        | 0        | 0        | 91    | 18           |
| 20A     | 2006 | AA        | 10/27/-11/05 | 550                | 1472                  | 550            | 31.3      | 501     | 2040        | 159     | 0        | 0        | 0        | 159   | 32           |
| 20A     | 2007 | AA        | 10/26/-11/04 | 600                | 1130                  | 596            | 45.4      | 564     | 2330        | 167     | 0        | 0        | 0        | 167   | 30           |
| 20A     | 2008 | AA        | 10/24/-11/02 | 700                | 1031                  | 700            | 55.3      | 650     | 3040        | 113     | 0        | 0        | 0        | 113   | 17           |
| 20B     | 2004 | AA        | 11/12/-11/21 | 200                | 454                   | 200            | 32.8      | 181     | 726         | 29      | 0        | 0        | 0        | 29    | 16           |
| 20B     | 2005 | AA        | 11/11/-11/20 | 225                | 356                   | 225            | 46.1      | 213     | 793         | 45      | 0        | 0        | 0        | 45    | 21           |
| 20B     | 2006 | AA        | 11/10/-11/19 | 300                | 473                   | 300            | 43.1      | 272     | 983         | 48      | 0        | 0        | 0        | 48    | 18           |
| 20B     | 2007 | AA        | 11/09/-11/18 | 350                | 312                   | 350            | 74.0      | 332     | 1204        | 61      | 0        | 0        | 0        | 61    | 18           |
| 20B     | 2008 | AA        | 11/14/-11/23 | 350                | 283                   | 350            | 77.0      | 322     | 1273        | 35      | 0        | 0        | 0        | 35    | 11           |
| 20C     | 2004 | AA        | 10/29/-11/01 | 250                | 293                   | 250            | 53.9      | 216     | 612         | 29      | 0        | 0        | 0        | 29    | 13           |
| 20C     | 2004 | AA        | 11/05/-11/14 | 250                | 334                   | 250            | 51.2      | 229     | 982         | 44      | 0        | 0        | 0        | 44    | 19           |
| 20C     | 2005 | AA        | 10/28/-10/31 | 225                | 229                   | 225            | 68.1      | 210     | 627         | 35      | 0        | 0        | 0        | 35    | 17           |
| 20C     | 2005 | AA        | 11/04/-11/13 | 225                | 293                   | 225            | 49.8      | 208     | 856         | 44      | 0        | 0        | 0        | 44    | 21           |
| 20C E   | 2006 | AA        | 10/27/-11/01 | 300                | 337                   | 300            | 60.8      | 266     | 823         | 68      | 0        | 0        | 0        | 68    | 26           |
| 20C E   | 2007 | AA        | 10/26/-10/31 | 350                | 275                   | 350            | 86.2      | 318     | 1105        | 102     | 0        | 0        | 0        | 102   | 32           |
| 20C E   | 2008 | AA        | 10/31/-11/06 | 300                | 412                   | 300            | 56.8      | 276     | 959         | 69      | 0        | 0        | 0        | 69    | 25           |
| 20C L   | 2006 | AA        | 11/03/-11/12 | 150                | 217                   | 150            | 47.0      | 136     | 577         | 18      | 0        | 0        | 0        | 18    | 13           |
| 20C L   | 2007 | AA        | 11/02/-11/11 | 200                | 121                   | 200            | 87.6      | 182     | 749         | 42      | 0        | 0        | 0        | 42    | 23           |
| 20C L   | 2008 | AA        | 11/07/-11/13 | 250                | 98                    | 250            | 99.0      | 227     | 869         | 62      | 0        | 0        | 0        | 62    | 27           |
| 21      | 2004 | MD        | 11/05/-11/14 | 400                | 949                   | 400            | 31.9      | 367     | 1449        | 52      | 0        | 0        | 0        | 52    | 14           |
| 21      | 2005 | MD        | 11/04/-11/13 | 400                | 1003                  | 400            | 29.3      | 366     | 1380        | 54      | 0        | 0        | 0        | 54    | 15           |
| 21      | 2006 | MD        | 11/10/-11/19 | 400                | 823                   | 400            | 36.3      | 368     | 1495        | 71      | 0        | 0        | 0        | 71    | 19           |
| 21      | 2007 | MD        | 11/09/-11/18 | 450                | 581                   | 450            | 55.2      | 426     | 1842        | 104     | 0        | 0        | 0        | 104   | 24           |
| 21      | 2008 | MD        | 11/07/-11/13 | 450                | 668                   | 450            | 46.7      | 419     | 1553        | 82      | 0        | 0        | 0        | 82    | 20           |
| 21      | 2004 | WT        | 12/17/-12/31 | 300                | 484                   | 300            | 37.2      | 279     | 1256        | 0       | 0        | 88       | 0        | 88    | 32           |
| 21      | 2005 | WT        | 12/16/-12/31 | 300                | 461                   | 300            | 30.2      | 279     | 1529        | 0       | 0        | 86       | 0        | 86    | 31           |

AA = Any Antlered Deer MD = Mule Deer WT = Whitetail Deer ALS = Antlerless CN = Camp Navajo FTHU = Fort Huachuca,  
C = CHAMP Hunt; in the unit column E = early or 1st season M = 2nd season T = 3rd season L = late or 4th season.

# Deer Hunt Data

## 5-Year: 2004-2008 Harvest

| Unit    | Year | Hunt Type | Dates        | Permits Authorized | 1st Choice Applicants | Permits Issued | Draw Odds | Hunters | Hunter Days | Harvest |          |          |          |       | Hunt Success |
|---------|------|-----------|--------------|--------------------|-----------------------|----------------|-----------|---------|-------------|---------|----------|----------|----------|-------|--------------|
|         |      |           |              |                    |                       |                |           |         |             | MD-Buck | MD-Aless | WT- Buck | WT-Aless | Total |              |
| GENERAL |      |           |              |                    |                       |                |           |         |             |         |          |          |          |       |              |
| 21 E    | 2006 | WT        | 10/27/-11/05 | 350                | 114                   | 350            | 100.0     | 317     | 1300        | 0       | 0        | 69       | 0        | 69    | 22           |
| 21 E    | 2007 | WT        | 10/26/-11/04 | 400                | 197                   | 400            | 93.4      | 380     | 1640        | 0       | 0        | 62       | 0        | 62    | 16           |
| 21 E    | 2008 | WT        | 10/24/-10/30 | 460                | 167                   | 460            | 99.4      | 429     | 1597        | 0       | 0        | 93       | 0        | 93    | 22           |
| 21 L    | 2006 | WT        | 12/15/-12/31 | 50                 | 318                   | 50             | 12.6      | 41      | 239         | 0       | 0        | 17       | 0        | 17    | 41           |
| 21 L    | 2007 | WT        | 12/14/-12/31 | 50                 | 281                   | 50             | 13.5      | 47      | 228         | 0       | 0        | 19       | 0        | 19    | 40           |
| 21 L    | 2008 | WT        | 12/12/-12/31 | 20                 | 217                   | 20             | 6.5       | 20      | 114         | 0       | 0        | 10       | 0        | 10    | 50           |
| 22      | 2004 | MD        | 10/29/-11/07 | 500                | 1571                  | 500            | 25.3      | 443     | 1958        | 61      | 0        | 0        | 0        | 61    | 14           |
| 22      | 2005 | MD        | 10/28/-11/06 | 500                | 1482                  | 500            | 26.9      | 454     | 1918        | 82      | 0        | 0        | 0        | 82    | 18           |
| 22      | 2006 | MD        | 10/27/-11/05 | 500                | 1293                  | 498            | 29.3      | 473     | 2073        | 79      | 0        | 0        | 0        | 79    | 17           |
| 22      | 2007 | MD        | 10/26/-11/04 | 600                | 952                   | 600            | 42.9      | 566     | 2445        | 99      | 0        | 0        | 0        | 99    | 17           |
| 22      | 2008 | MD        | 10/24/-11/02 | 625                | 924                   | 625            | 47.4      | 583     | 2529        | 88      | 0        | 0        | 0        | 88    | 15           |
| 22      | 2004 | WT        | 12/17/-12/31 | 450                | 1498                  | 450            | 23.1      | 415     | 1923        | 0       | 0        | 164      | 0        | 164   | 40           |
| 22      | 2005 | WT        | 12/16/-12/31 | 450                | 1434                  | 450            | 23.2      | 416     | 1997        | 0       | 0        | 117      | 0        | 117   | 28           |
| 22 E    | 2006 | WT        | 10/27/-11/05 | 500                | 434                   | 500            | 59.4      | 458     | 2123        | 0       | 0        | 78       | 0        | 78    | 17           |
| 22 E    | 2007 | WT        | 10/26/-11/04 | 500                | 365                   | 500            | 69.6      | 441     | 1806        | 0       | 0        | 107      | 0        | 107   | 24           |
| 22 E    | 2008 | WT        | 10/24/-10/30 | 660                | 379                   | 660            | 91.8      | 622     | 2384        | 0       | 0        | 121      | 0        | 121   | 19           |
| 22 L    | 2006 | WT        | 12/15/-12/31 | 50                 | 749                   | 50             | 5.5       | 50      | 289         | 0       | 0        | 18       | 0        | 18    | 36           |
| 22 L    | 2007 | WT        | 12/14/-12/31 | 50                 | 522                   | 50             | 6.1       | 48      | 271         | 0       | 0        | 33       | 0        | 33    | 69           |
| 22 L    | 2008 | WT        | 12/12/-12/31 | 25                 | 464                   | 25             | 4.5       | 25      | 154         | 0       | 0        | 17       | 0        | 17    | 68           |
| 23      | 2004 | MD        | 10/29/-11/07 | 450                | 1745                  | 450            | 21.7      | 437     | 1818        | 99      | 0        | 0        | 0        | 99    | 23           |
| 23      | 2005 | MD        | 10/28/-11/06 | 450                | 1849                  | 450            | 20.6      | 405     | 1755        | 69      | 0        | 0        | 0        | 69    | 17           |
| 23      | 2006 | MD        | 10/27/-11/05 | 525                | 1772                  | 524            | 24.2      | 506     | 2316        | 97      | 0        | 0        | 0        | 97    | 19           |
| 23      | 2007 | MD        | 10/26/-11/04 | 575                | 1494                  | 575            | 32.7      | 555     | 2488        | 121     | 0        | 0        | 0        | 121   | 22           |
| 23      | 2008 | MD        | 10/31/-11/06 | 610                | 1432                  | 610            | 36.2      | 555     | 2354        | 98      | 0        | 0        | 0        | 98    | 18           |
| 23      | 2004 | WT        | 12/17/-12/31 | 300                | 1164                  | 300            | 19.0      | 260     | 1209        | 0       | 0        | 123      | 0        | 123   | 47           |
| 23 E    | 2005 | WT        | 10/28/-10/31 | 300                | 257                   | 300            | 44.4      | 259     | 806         | 0       | 0        | 50       | 0        | 50    | 19           |
| 23 E    | 2006 | WT        | 10/27/-11/05 | 425                | 402                   | 425            | 47.8      | 397     | 1698        | 0       | 0        | 82       | 0        | 82    | 21           |
| 23 E    | 2007 | WT        | 10/26/-11/04 | 600                | 457                   | 600            | 61.3      | 551     | 2458        | 0       | 0        | 120      | 0        | 120   | 22           |
| 23 E    | 2008 | WT        | 10/24/-10/30 | 575                | 446                   | 575            | 64.6      | 526     | 2009        | 0       | 0        | 104      | 0        | 104   | 20           |
| 23 L    | 2005 | WT        | 12/16/-12/31 | 150                | 1144                  | 150            | 12.0      | 140     | 756         | 0       | 0        | 48       | 0        | 48    | 34           |
| 23 L    | 2006 | WT        | 12/15/-12/31 | 50                 | 872                   | 50             | 4.7       | 43      | 209         | 0       | 0        | 11       | 0        | 11    | 26           |
| 23 L    | 2007 | WT        | 12/14/-12/31 | 50                 | 747                   | 50             | 5.8       | 44      | 244         | 0       | 0        | 27       | 0        | 27    | 61           |
| 23 L    | 2008 | WT        | 12/12/-12/31 | 85                 | 905                   | 85             | 7.1       | 76      | 321         | 0       | 0        | 51       | 0        | 51    | 67           |
| 24A     | 2004 | MD        | 11/12/-11/21 | 125                | 527                   | 125            | 18.6      | 111     | 447         | 43      | 0        | 0        | 0        | 43    | 39           |
| 24A     | 2005 | MD        | 11/11/-11/20 | 175                | 551                   | 175            | 26.9      | 164     | 716         | 61      | 0        | 0        | 0        | 61    | 37           |
| 24A     | 2006 | MD        | 11/10/-11/19 | 175                | 547                   | 175            | 24.5      | 162     | 664         | 51      | 0        | 0        | 0        | 51    | 31           |
| 24A     | 2007 | MD        | 10/26/-11/04 | 140                | 435                   | 140            | 25.5      | 138     | 660         | 63      | 0        | 0        | 0        | 63    | 46           |
| 24A     | 2008 | MD        | 11/14/-11/20 | 165                | 440                   | 165            | 33.0      | 156     | 591         | 52      | 0        | 0        | 0        | 52    | 33           |
| 24A     | 2004 | WT        | 12/17/-12/31 | 375                | 995                   | 375            | 27.5      | 356     | 1634        | 0       | 0        | 180      | 0        | 180   | 51           |
| 24A     | 2005 | WT        | 12/16/-12/31 | 375                | 1019                  | 375            | 28.9      | 354     | 1824        | 0       | 0        | 152      | 0        | 152   | 43           |
| 24A E   | 2006 | WT        | 11/10/-11/19 | 550                | 359                   | 550            | 73.3      | 526     | 2315        | 0       | 0        | 175      | 0        | 175   | 33           |
| 24A E   | 2007 | WT        | 11/09/-11/18 | 600                | 381                   | 600            | 79.8      | 566     | 2354        | 0       | 0        | 159      | 0        | 159   | 28           |
| 24A E   | 2008 | WT        | 10/24/-10/30 | 355                | 188                   | 355            | 97.3      | 331     | 1217        | 0       | 0        | 127      | 0        | 127   | 38           |
| 24A M   | 2008 | WT        | 11/07/-11/13 | 355                | 219                   | 355            | 91.8      | 323     | 1323        | 0       | 0        | 58       | 0        | 58    | 18           |
| 24A L   | 2006 | WT        | 12/15/-12/31 | 50                 | 533                   | 50             | 8.1       | 50      | 266         | 0       | 0        | 25       | 0        | 25    | 50           |
| 24A L   | 2007 | WT        | 12/14/-12/31 | 50                 | 451                   | 50             | 9.3       | 47      | 232         | 0       | 0        | 24       | 0        | 24    | 51           |
| 24A L   | 2008 | WT        | 12/12/-12/31 | 30                 | 309                   | 30             | 7.1       | 28      | 92          | 0       | 0        | 21       | 0        | 21    | 75           |
| 24B     | 2004 | MD        | 11/12/-11/21 | 350                | 601                   | 350            | 38.4      | 324     | 1473        | 39      | 0        | 0        | 0        | 39    | 12           |
| 24B     | 2005 | MD        | 11/11/-11/20 | 550                | 669                   | 550            | 56.2      | 513     | 2242        | 90      | 0        | 0        | 0        | 90    | 18           |
| 24B     | 2006 | MD        | 11/03/-11/12 | 450                | 642                   | 449            | 42.7      | 390     | 1639        | 53      | 0        | 0        | 0        | 53    | 14           |
| 24B     | 2007 | MD        | 11/02/-11/11 | 450                | 491                   | 448            | 64.2      | 435     | 1883        | 59      | 0        | 0        | 0        | 59    | 14           |
| 24B     | 2008 | MD        | 11/14/-11/20 | 450                | 452                   | 450            | 68.1      | 427     | 1450        | 95      | 0        | 0        | 0        | 95    | 22           |
| 24B E   | 2006 | WT        | 10/27/-11/01 | 250                | 100                   | 250            | 100.0     | 231     | 806         | 0       | 0        | 54       | 0        | 54    | 23           |
| 24B E   | 2007 | WT        | 10/26/-10/31 | 250                | 137                   | 250            | 97.8      | 230     | 743         | 0       | 0        | 67       | 0        | 67    | 29           |
| 24B E   | 2008 | WT        | 10/24/-10/30 | 305                | 140                   | 305            | 98.6      | 287     | 918         | 0       | 0        | 62       | 0        | 62    | 22           |
| 24B M   | 2006 | WT        | 11/10/-11/19 | 200                | 113                   | 200            | 69.0      | 177     | 738         | 0       | 0        | 40       | 0        | 40    | 23           |
| 24B M   | 2007 | WT        | 11/09/-11/18 | 250                | 110                   | 250            | 97.3      | 224     | 943         | 0       | 0        | 54       | 0        | 54    | 24           |
| 24B M   | 2008 | WT        | 11/07/-11/13 | 305                | 152                   | 305            | 96.1      | 295     | 1109        | 0       | 0        | 91       | 0        | 91    | 31           |
| 24B L   | 2004 | WT        | 12/17/-12/31 | 350                | 678                   | 350            | 33.2      | 307     | 1260        | 0       | 0        | 151      | 0        | 151   | 49           |
| 24B L   | 2005 | WT        | 12/16/-12/31 | 350                | 707                   | 350            | 34.8      | 328     | 1482        | 0       | 0        | 137      | 0        | 137   | 42           |
| 24B L   | 2006 | WT        | 12/15/-12/31 | 50                 | 356                   | 50             | 10.4      | 45      | 205         | 0       | 0        | 23       | 0        | 23    | 51           |
| 24B L   | 2007 | WT        | 12/14/-12/31 | 50                 | 379                   | 50             | 9.2       | 50      | 269         | 0       | 0        | 27       | 0        | 27    | 54           |

AA = Any Antlered Deer MD = Mule Deer WT = Whitetail Deer ALS = Antlerless CN = Camp Navajo FTHU = Fort Huachuca,  
C = CHAMP Hunt; in the unit column E = early or 1st season M = 2nd season T = 3rd season L = late or 4th season.

# Deer Hunt Data

## 5-Year: 2004-2008 Harvest

| Unit    | Year | Hunt Type | Dates        | Permits Authorized | 1st Choice Applicants | Permits Issued | Draw Odds | Hunters | Hunter Days | Harvest |          |          |          |       | Hunt Success |
|---------|------|-----------|--------------|--------------------|-----------------------|----------------|-----------|---------|-------------|---------|----------|----------|----------|-------|--------------|
|         |      |           |              |                    |                       |                |           |         |             | MD-Buck | MD-Aless | WT- Buck | WT-Aless | Total |              |
| GENERAL |      |           |              |                    |                       |                |           |         |             |         |          |          |          |       |              |
| 24B L   | 2008 | WT        | 12/12-/12/31 | 25                 | 225                   | 25             | 8.0       | 20      | 130         | 0       | 0        | 7        | 0        | 7     | 35           |
| 27 E    | 2004 | MD        | 10/29-/11/07 | 800                | 2699                  | 800            | 22.8      | 724     | 3486        | 157     | 0        | 0        | 0        | 157   | 22           |
| 27 E    | 2005 | MD        | 10/28-/11/06 | 800                | 2345                  | 800            | 25.4      | 743     | 3286        | 168     | 0        | 0        | 0        | 168   | 23           |
| 27 E    | 2006 | MD        | 11/03-/11/12 | 725                | 2454                  | 725            | 22.0      | 676     | 3107        | 132     | 0        | 0        | 0        | 132   | 20           |
| 27 E    | 2007 | MD        | 11/02-/11/11 | 725                | 1914                  | 725            | 30.4      | 653     | 2900        | 186     | 0        | 0        | 0        | 186   | 28           |
| 27 E    | 2008 | MD        | 11/07-/11/13 | 900                | 1696                  | 900            | 43.2      | 839     | 3509        | 203     | 0        | 0        | 0        | 203   | 24           |
| 27/28   | 2004 | WT        | 12/17-/12/31 | 250                | 402                   | 250            | 34.6      | 215     | 1095        | 0       | 0        | 80       | 0        | 80    | 37           |
| 27/28   | 2005 | WT        | 12/16-/12/31 | 250                | 375                   | 250            | 39.7      | 230     | 1235        | 0       | 0        | 41       | 0        | 41    | 18           |
| 27/28 E | 2006 | WT        | 11/10-/11/19 | 150                | 100                   | 150            | 59.0      | 139     | 694         | 0       | 0        | 24       | 0        | 24    | 17           |
| 27/28 E | 2007 | WT        | 11/09-/11/18 | 150                | 103                   | 150            | 64.1      | 131     | 681         | 0       | 0        | 36       | 0        | 36    | 27           |
| 27/28 E | 2008 | WT        | 10/24-/10/30 | 350                | 142                   | 350            | 95.8      | 311     | 1309        | 0       | 0        | 72       | 0        | 72    | 23           |
| 27/28 L | 2006 | WT        | 12/15-/12/31 | 50                 | 265                   | 50             | 15.5      | 42      | 215         | 0       | 0        | 19       | 0        | 19    | 45           |
| 27/28 L | 2007 | WT        | 12/14-/12/31 | 50                 | 192                   | 50             | 17.7      | 46      | 246         | 0       | 0        | 15       | 0        | 15    | 33           |
| 27/28 L | 2008 | WT        | 12/12-/12/31 | 15                 | 140                   | 15             | 9.3       | 13      | 72          | 0       | 0        | 8        | 0        | 8     | 62           |
| 28 E    | 2004 | AA        | 10/29-/11/01 | 400                | 450                   | 400            | 50.4      | 385     | 1188        | 82      | 0        | 3        | 0        | 85    | 22           |
| 28 E    | 2005 | AA        | 10/28-/10/31 | 400                | 432                   | 400            | 55.1      | 367     | 1098        | 86      | 0        | 5        | 0        | 91    | 25           |
| 28 L    | 2004 | AA        | 11/05-/11/14 | 400                | 513                   | 400            | 54.4      | 376     | 1666        | 72      | 0        | 5        | 0        | 77    | 20           |
| 28 L    | 2005 | AA        | 11/04-/11/13 | 400                | 408                   | 400            | 61.8      | 371     | 1822        | 68      | 0        | 0        | 0        | 68    | 18           |
| 28 E    | 2006 | MD        | 10/27-/11/01 | 400                | 439                   | 399            | 54.7      | 381     | 1355        | 76      | 0        | 0        | 0        | 76    | 20           |
| 28 E    | 2007 | MD        | 10/26-/10/31 | 400                | 355                   | 400            | 73.2      | 385     | 1455        | 86      | 0        | 0        | 0        | 86    | 22           |
| 28 E    | 2008 | MD        | 10/31-/11/06 | 400                | 451                   | 400            | 63.0      | 385     | 1540        | 96      | 0        | 0        | 0        | 96    | 25           |
| 28 L    | 2006 | MD        | 11/03-/11/12 | 400                | 336                   | 400            | 62.2      | 380     | 2138        | 82      | 0        | 0        | 0        | 82    | 22           |
| 28 L    | 2007 | MD        | 11/02-/11/11 | 400                | 282                   | 400            | 78.7      | 371     | 1743        | 117     | 0        | 0        | 0        | 117   | 32           |
| 28 L    | 2008 | MD        | 11/14-/11/20 | 400                | 228                   | 400            | 95.2      | 373     | 1349        | 139     | 0        | 0        | 0        | 139   | 37           |
| 29 E    | 2004 | MD        | 10/29-/11/01 | 200                | 176                   | 200            | 86.9      | 180     | 580         | 27      | 0        | 0        | 0        | 27    | 15           |
| 29 E    | 2005 | MD        | 10/28-/10/31 | 150                | 119                   | 150            | 97.5      | 145     | 440         | 8       | 0        | 0        | 0        | 8     | 6            |
| 29 E    | 2006 | MD        | 10/27-/11/01 | 125                | 83                    | 125            | 96.4      | 100     | 382         | 7       | 0        | 0        | 0        | 7     | 7            |
| 29 E    | 2008 | MD        | 10/31-/11/06 | 75                 | 84                    | 75             | 67.9      | 66      | 259         | 13      | 0        | 0        | 0        | 13    | 20           |
| 29 L    | 2004 | MD        | 11/05-/11/14 | 200                | 177                   | 200            | 78.5      | 161     | 772         | 28      | 0        | 0        | 0        | 28    | 17           |
| 29 L    | 2005 | MD        | 11/04-/11/13 | 150                | 67                    | 150            | 100.0     | 136     | 524         | 20      | 0        | 0        | 0        | 20    | 15           |
| 29 L    | 2006 | MD        | 11/03-/11/12 | 125                | 62                    | 125            | 98.4      | 106     | 465         | 14      | 0        | 0        | 0        | 14    | 13           |
| 29 L    | 2007 | MD        | 11/02-/11/11 | 150                | 123                   | 150            | 82.9      | 145     | 543         | 48      | 0        | 0        | 0        | 48    | 33           |
| 29 L    | 2008 | MD        | 11/14-/11/20 | 75                 | 43                    | 75             | 100.0     | 68      | 265         | 18      | 0        | 0        | 0        | 18    | 26           |
| 29 T    | 2008 | WT        | 11/28-/12/04 | 275                | 39                    | 275            | 100.0     | 233     | 829         | 0       | 0        | 50       | 0        | 50    | 21           |
| 29 E    | 2004 | WT        | 10/29-/11/01 | 350                | 191                   | 350            | 95.8      | 322     | 946         | 0       | 0        | 104      | 0        | 104   | 32           |
| 29 E    | 2005 | WT        | 10/28-/10/31 | 400                | 243                   | 400            | 98.8      | 356     | 1069        | 0       | 0        | 62       | 0        | 62    | 17           |
| 29 E    | 2006 | WT        | 10/27-/11/01 | 400                | 185                   | 400            | 97.8      | 337     | 1142        | 0       | 0        | 49       | 0        | 49    | 15           |
| 29 E    | 2007 | WT        | 10/26-/10/31 | 400                | 154                   | 400            | 100.0     | 320     | 1054        | 0       | 0        | 66       | 0        | 66    | 21           |
| 29 E    | 2008 | WT        | 10/24-/10/30 | 285                | 162                   | 285            | 99.4      | 252     | 924         | 0       | 0        | 45       | 0        | 45    | 18           |
| 29 M    | 2004 | WT        | 11/12-/11/21 | 550                | 284                   | 550            | 100.0     | 509     | 2097        | 0       | 0        | 148      | 0        | 148   | 29           |
| 29 M    | 2005 | WT        | 11/11-/11/20 | 500                | 297                   | 500            | 95.6      | 452     | 2068        | 0       | 0        | 88       | 0        | 88    | 19           |
| 29 M    | 2006 | WT        | 11/10-/11/19 | 450                | 229                   | 449            | 95.2      | 387     | 1683        | 0       | 0        | 72       | 0        | 72    | 19           |
| 29 M    | 2007 | WT        | 11/09-/11/18 | 400                | 186                   | 400            | 96.2      | 374     | 1598        | 0       | 0        | 58       | 0        | 58    | 16           |
| 29 M    | 2008 | WT        | 11/07-/11/13 | 275                | 89                    | 275            | 100.0     | 247     | 848         | 0       | 0        | 75       | 0        | 75    | 30           |
| 29 L    | 2004 | WT        | 12/17-/12/31 | 50                 | 368                   | 50             | 11.1      | 45      | 248         | 0       | 0        | 13       | 0        | 13    | 29           |
| 29 L    | 2005 | WT        | 12/16-/12/31 | 50                 | 323                   | 50             | 12.7      | 50      | 284         | 0       | 0        | 12       | 0        | 12    | 24           |
| 29 L    | 2006 | WT        | 12/15-/12/31 | 75                 | 297                   | 74             | 18.2      | 69      | 412         | 0       | 0        | 7        | 0        | 7     | 10           |
| 29 L    | 2007 | WT        | 12/14-/12/31 | 75                 | 284                   | 75             | 21.8      | 67      | 292         | 0       | 0        | 30       | 0        | 30    | 45           |
| 29 L    | 2008 | WT        | 12/12-/12/31 | 40                 | 180                   | 40             | 13.9      | 36      | 215         | 0       | 0        | 19       | 0        | 19    | 53           |
| 30A E   | 2004 | MD        | 10/29-/11/01 | 300                | 368                   | 300            | 70.1      | 272     | 730         | 61      | 0        | 0        | 0        | 61    | 22           |
| 30A E   | 2005 | MD        | 10/28-/10/31 | 300                | 259                   | 300            | 92.3      | 270     | 804         | 45      | 0        | 0        | 0        | 45    | 17           |
| 30A E   | 2006 | MD        | 10/27-/11/01 | 300                | 277                   | 300            | 80.1      | 287     | 882         | 55      | 0        | 0        | 0        | 55    | 19           |
| 30A E   | 2007 | MD        | 10/26-/10/31 | 300                | 247                   | 300            | 96.0      | 288     | 964         | 112     | 0        | 0        | 0        | 112   | 39           |
| 30A E   | 2008 | MD        | 10/31-/11/06 | 325                | 389                   | 325            | 71.0      | 305     | 1021        | 124     | 0        | 0        | 0        | 124   | 41           |
| 30A L   | 2004 | MD        | 11/05-/11/14 | 350                | 387                   | 350            | 76.2      | 318     | 1522        | 93      | 0        | 0        | 0        | 93    | 29           |
| 30A L   | 2005 | MD        | 11/04-/11/13 | 350                | 292                   | 350            | 94.9      | 334     | 1543        | 85      | 0        | 0        | 0        | 85    | 25           |
| 30A L   | 2006 | MD        | 11/03-/11/12 | 350                | 298                   | 349            | 96.3      | 320     | 1621        | 61      | 0        | 0        | 0        | 61    | 19           |
| 30A L   | 2007 | MD        | 11/02-/11/11 | 300                | 211                   | 300            | 95.3      | 287     | 1215        | 102     | 0        | 0        | 0        | 102   | 36           |
| 30A L   | 2008 | MD        | 11/14-/11/20 | 325                | 150                   | 325            | 92.7      | 301     | 1109        | 102     | 0        | 0        | 0        | 102   | 34           |
| 30A T   | 2008 | WT        | 11/28-/12/04 | 175                | 16                    | 168            | 100.0     | 135     | 496         | 0       | 0        | 57       | 0        | 57    | 42           |
| 30A E   | 2004 | WT        | 10/29-/11/01 | 250                | 45                    | 250            | 100.0     | 208     | 593         | 0       | 0        | 63       | 0        | 63    | 30           |

AA = Any Antlered Deer MD = Mule Deer WT = Whitetail Deer ALS = Antlerless CN = Camp Navajo FTHU = Fort Huachuca,  
C = CHAMP Hunt; in the unit column E = early or 1st season M = 2nd season T = 3rd season L = late or 4th season.

# Deer Hunt Data

## 5-Year: 2004-2008 Harvest

| Unit    | Year | Hunt Type | Dates        | Permits Authorized | 1st Choice Applicants | Permits Issued | Draw Odds | Hunters | Hunter Days | Harvest |          |          |          |       | Hunt Success |
|---------|------|-----------|--------------|--------------------|-----------------------|----------------|-----------|---------|-------------|---------|----------|----------|----------|-------|--------------|
|         |      |           |              |                    |                       |                |           |         |             | MD-Buck | MD-Aless | WT- Buck | WT-Aless | Total |              |
| GENERAL |      |           |              |                    |                       |                |           |         |             |         |          |          |          |       |              |
| 30A E   | 2005 | WT        | 10/28/-10/31 | 250                | 36                    | 250            | 88.9      | 213     | 593         | 0       | 0        | 35       | 0        | 35    | 16           |
| 30A E   | 2006 | WT        | 10/27/-11/01 | 250                | 28                    | 250            | 100.0     | 203     | 618         | 0       | 0        | 54       | 0        | 54    | 27           |
| 30A E   | 2007 | WT        | 10/26/-10/31 | 250                | 69                    | 250            | 100.0     | 212     | 631         | 0       | 0        | 52       | 0        | 52    | 25           |
| 30A E   | 2008 | WT        | 10/24/-10/30 | 200                | 70                    | 200            | 78.6      | 167     | 538         | 0       | 0        | 38       | 0        | 38    | 23           |
| 30A M   | 2004 | WT        | 11/12/-11/21 | 300                | 66                    | 300            | 97.0      | 251     | 902         | 0       | 0        | 35       | 0        | 35    | 14           |
| 30A M   | 2005 | WT        | 11/11/-11/20 | 300                | 51                    | 300            | 100.0     | 254     | 994         | 0       | 0        | 80       | 0        | 80    | 31           |
| 30A M   | 2006 | WT        | 11/10/-11/19 | 275                | 93                    | 275            | 90.3      | 247     | 1000        | 0       | 0        | 54       | 0        | 54    | 22           |
| 30A M   | 2007 | WT        | 11/09/-11/18 | 275                | 49                    | 275            | 100.0     | 240     | 1002        | 0       | 0        | 52       | 0        | 52    | 22           |
| 30A M   | 2008 | WT        | 11/07/-11/13 | 200                | 24                    | 194            | 100.0     | 163     | 543         | 0       | 0        | 47       | 0        | 47    | 29           |
| 30A L   | 2004 | WT        | 12/17/-12/31 | 50                 | 216                   | 50             | 13.9      | 46      | 217         | 0       | 0        | 13       | 0        | 13    | 28           |
| 30A L   | 2005 | WT        | 12/16/-12/31 | 50                 | 154                   | 50             | 22.1      | 41      | 195         | 0       | 0        | 11       | 0        | 11    | 27           |
| 30A L   | 2006 | WT        | 12/15/-12/31 | 75                 | 192                   | 75             | 24.5      | 71      | 357         | 0       | 0        | 16       | 0        | 16    | 23           |
| 30A L   | 2007 | WT        | 12/14/-12/31 | 75                 | 128                   | 75             | 32.8      | 73      | 336         | 0       | 0        | 19       | 0        | 19    | 26           |
| 30A L   | 2008 | WT        | 12/12/-12/31 | 40                 | 149                   | 40             | 20.8      | 38      | 181         | 0       | 0        | 17       | 0        | 17    | 45           |
| 30B E   | 2004 | MD        | 10/29/-11/01 | 400                | 288                   | 400            | 97.6      | 375     | 1106        | 53      | 0        | 0        | 0        | 53    | 14           |
| 30B E   | 2005 | MD        | 10/28/-10/31 | 400                | 221                   | 400            | 97.3      | 360     | 1133        | 88      | 0        | 0        | 0        | 88    | 24           |
| 30B E   | 2006 | MD        | 10/27/-11/01 | 400                | 265                   | 399            | 98.9      | 344     | 1160        | 65      | 0        | 0        | 0        | 65    | 19           |
| 30B E   | 2007 | MD        | 10/26/-10/31 | 350                | 272                   | 350            | 98.5      | 334     | 1226        | 68      | 0        | 0        | 0        | 68    | 20           |
| 30B E   | 2008 | MD        | 10/31/-11/06 | 400                | 374                   | 400            | 93.0      | 393     | 1577        | 93      | 0        | 0        | 0        | 93    | 24           |
| 30B L   | 2004 | MD        | 11/05/-11/14 | 400                | 356                   | 400            | 85.4      | 371     | 1802        | 95      | 0        | 0        | 0        | 95    | 26           |
| 30B L   | 2005 | MD        | 11/04/-11/13 | 400                | 396                   | 400            | 82.6      | 358     | 1784        | 61      | 0        | 0        | 0        | 61    | 17           |
| 30B L   | 2006 | MD        | 11/03/-11/12 | 400                | 312                   | 400            | 94.2      | 369     | 1985        | 61      | 0        | 0        | 0        | 61    | 17           |
| 30B L   | 2007 | MD        | 11/02/-11/11 | 350                | 223                   | 350            | 99.6      | 327     | 1725        | 101     | 0        | 0        | 0        | 101   | 31           |
| 30B L   | 2008 | MD        | 11/14/-11/20 | 400                | 145                   | 400            | 100.0     | 369     | 1469        | 92      | 0        | 0        | 0        | 92    | 25           |
| 30B T   | 2008 | WT        | 11/28/-12/04 | 150                | 16                    | 131            | 100.0     | 116     | 413         | 0       | 0        | 30       | 0        | 30    | 26           |
| 30B E   | 2004 | WT        | 10/29/-11/01 | 250                | 39                    | 250            | 100.0     | 211     | 645         | 0       | 0        | 42       | 0        | 42    | 20           |
| 30B E   | 2005 | WT        | 10/28/-10/31 | 300                | 43                    | 300            | 100.0     | 269     | 788         | 0       | 0        | 26       | 0        | 26    | 10           |
| 30B E   | 2006 | WT        | 10/27/-11/01 | 250                | 33                    | 250            | 100.0     | 211     | 583         | 0       | 0        | 51       | 0        | 51    | 24           |
| 30B E   | 2007 | WT        | 10/26/-10/31 | 250                | 35                    | 250            | 100.0     | 220     | 725         | 0       | 0        | 30       | 0        | 30    | 14           |
| 30B E   | 2008 | WT        | 10/24/-10/30 | 150                | 36                    | 150            | 94.4      | 117     | 384         | 0       | 0        | 23       | 0        | 23    | 20           |
| 30B M   | 2004 | WT        | 11/12/-11/21 | 250                | 53                    | 252            | 100.0     | 217     | 886         | 0       | 0        | 45       | 0        | 45    | 21           |
| 30B M   | 2005 | WT        | 11/11/-11/20 | 300                | 91                    | 300            | 90.1      | 257     | 1014        | 0       | 0        | 58       | 0        | 58    | 23           |
| 30B M   | 2006 | WT        | 11/10/-11/19 | 250                | 38                    | 249            | 89.5      | 226     | 941         | 0       | 0        | 50       | 0        | 50    | 22           |
| 30B M   | 2007 | WT        | 11/09/-11/18 | 250                | 26                    | 250            | 92.3      | 204     | 880         | 0       | 0        | 43       | 0        | 43    | 21           |
| 30B M   | 2008 | WT        | 11/07/-11/13 | 150                | 25                    | 118            | 96.0      | 111     | 475         | 0       | 0        | 30       | 0        | 30    | 27           |
| 30B L   | 2006 | WT        | 12/15/-12/31 | 50                 | 77                    | 50             | 33.8      | 47      | 216         | 0       | 0        | 16       | 0        | 16    | 34           |
| 30B L   | 2007 | WT        | 12/14/-12/31 | 50                 | 115                   | 50             | 27.0      | 48      | 179         | 0       | 0        | 21       | 0        | 21    | 44           |
| 30B L   | 2008 | WT        | 12/12/-12/31 | 75                 | 145                   | 75             | 32.4      | 73      | 357         | 0       | 0        | 34       | 0        | 34    | 47           |
| 31 E    | 2004 | MD        | 10/29/-11/01 | 100                | 221                   | 100            | 37.6      | 90      | 223         | 40      | 0        | 0        | 0        | 40    | 44           |
| 31 E    | 2005 | MD        | 10/28/-10/31 | 100                | 285                   | 100            | 26.7      | 95      | 286         | 26      | 0        | 0        | 0        | 26    | 27           |
| 31 E    | 2006 | MD        | 10/27/-11/01 | 100                | 302                   | 100            | 27.5      | 83      | 248         | 13      | 0        | 0        | 0        | 13    | 16           |
| 31 E    | 2008 | MD        | 10/31/-11/06 | 150                | 222                   | 150            | 50.0      | 146     | 552         | 35      | 0        | 0        | 0        | 35    | 24           |
| 31 L    | 2004 | MD        | 11/05/-11/14 | 200                | 258                   | 200            | 52.3      | 179     | 839         | 37      | 0        | 0        | 0        | 37    | 21           |
| 31 L    | 2005 | MD        | 11/04/-11/13 | 200                | 267                   | 200            | 49.8      | 188     | 872         | 53      | 0        | 0        | 0        | 53    | 28           |
| 31 L    | 2006 | MD        | 11/03/-11/12 | 200                | 278                   | 200            | 47.5      | 174     | 818         | 76      | 0        | 0        | 0        | 76    | 44           |
| 31 L    | 2007 | MD        | 11/02/-11/11 | 300                | 493                   | 300            | 46.5      | 274     | 1282        | 64      | 0        | 0        | 0        | 64    | 23           |
| 31 L    | 2008 | MD        | 11/14/-11/20 | 150                | 99                    | 150            | 82.8      | 146     | 581         | 31      | 0        | 0        | 0        | 31    | 21           |
| 31 T    | 2008 | WT        | 11/28/-12/04 | 300                | 90                    | 300            | 96.7      | 256     | 1024        | 0       | 0        | 85       | 0        | 85    | 33           |
| 31 E    | 2004 | WT        | 10/29/-11/01 | 450                | 338                   | 450            | 84.0      | 392     | 1124        | 0       | 0        | 113      | 0        | 113   | 29           |
| 31 E    | 2005 | WT        | 10/28/-10/31 | 450                | 291                   | 451            | 75.9      | 394     | 1064        | 0       | 0        | 135      | 0        | 135   | 34           |
| 31 E    | 2006 | WT        | 10/27/-11/01 | 450                | 319                   | 450            | 80.3      | 395     | 1285        | 0       | 0        | 104      | 0        | 104   | 26           |
| 31 E    | 2007 | WT        | 10/26/-10/31 | 550                | 319                   | 550            | 97.8      | 497     | 1763        | 0       | 0        | 127      | 0        | 127   | 26           |
| 31 E    | 2008 | WT        | 10/24/-10/30 | 325                | 298                   | 325            | 74.5      | 290     | 1048        | 0       | 0        | 93       | 0        | 93    | 32           |
| 31 M    | 2004 | WT        | 11/12/-11/21 | 550                | 416                   | 550            | 65.9      | 493     | 2028        | 0       | 0        | 161      | 0        | 161   | 33           |
| 31 M    | 2005 | WT        | 11/11/-11/20 | 550                | 344                   | 550            | 78.2      | 506     | 2152        | 0       | 0        | 134      | 0        | 134   | 26           |
| 31 M    | 2006 | WT        | 11/10/-11/19 | 550                | 380                   | 550            | 69.2      | 509     | 2236        | 0       | 0        | 145      | 0        | 145   | 28           |
| 31 M    | 2007 | WT        | 11/09/-11/18 | 550                | 290                   | 546            | 87.9      | 506     | 2390        | 0       | 0        | 97       | 0        | 97    | 19           |
| 31 M    | 2008 | WT        | 11/07/-11/13 | 325                | 112                   | 326            | 97.3      | 295     | 1192        | 0       | 0        | 64       | 0        | 64    | 22           |
| 31 L    | 2004 | WT        | 12/17/-12/31 | 50                 | 563                   | 50             | 8.5       | 45      | 168         | 0       | 0        | 32       | 0        | 32    | 71           |
| 31 L    | 2005 | WT        | 12/16/-12/31 | 50                 | 586                   | 51             | 7.8       | 49      | 235         | 0       | 0        | 29       | 0        | 29    | 59           |
| 31 L    | 2006 | WT        | 12/15/-12/31 | 100                | 696                   | 100            | 12.4      | 91      | 511         | 0       | 0        | 43       | 0        | 43    | 47           |
| 31 L    | 2007 | WT        | 12/14/-12/31 | 100                | 618                   | 100            | 11.2      | 96      | 465         | 0       | 0        | 55       | 0        | 55    | 57           |

AA = Any Antlered Deer MD = Mule Deer WT = Whitetail Deer ALS = Antlerless CN = Camp Navajo FTHU = Fort Huachuca,  
C = CHAMP Hunt; in the unit column E = early or 1st season M = 2nd season T = 3rd season L = late or 4th season.



# Deer Hunt Data

## 5-Year: 2004-2008 Harvest

| Unit    | Year | Hunt Type | Dates        | Permits Authorized | 1st Choice Applicants | Permits Issued | Draw Odds | Hunters | Hunter Days | Harvest |          |          |          |       | Hunt Success |
|---------|------|-----------|--------------|--------------------|-----------------------|----------------|-----------|---------|-------------|---------|----------|----------|----------|-------|--------------|
|         |      |           |              |                    |                       |                |           |         |             | MD-Buck | MD-Aless | WT- Buck | WT-Aless | Total |              |
| GENERAL |      |           |              |                    |                       |                |           |         |             |         |          |          |          |       |              |
| 31 L    | 2008 | WT        | 12/12-/12/31 | 125                | 644                   | 125            | 15.1      | 120     | 688         | 0       | 0        | 75       | 0        | 75    | 63           |
| 32 E    | 2004 | MD        | 10/29-/11/01 | 375                | 1120                  | 375            | 28.1      | 350     | 1020        | 112     | 0        | 0        | 0        | 112   | 32           |
| 32 E    | 2005 | MD        | 10/28-/10/31 | 350                | 1063                  | 350            | 29.5      | 329     | 911         | 116     | 0        | 0        | 0        | 116   | 35           |
| 32 E    | 2006 | MD        | 10/27-/11/01 | 450                | 1077                  | 450            | 36.4      | 421     | 1304        | 108     | 0        | 0        | 0        | 108   | 26           |
| 32 E    | 2007 | MD        | 10/26-/10/31 | 200                | 667                   | 199            | 27.3      | 187     | 592         | 68      | 0        | 0        | 0        | 68    | 36           |
| 32 E    | 2008 | MD        | 10/31-/11/06 | 450                | 956                   | 450            | 44.2      | 422     | 1432        | 142     | 0        | 0        | 0        | 142   | 34           |
| 32 L    | 2004 | MD        | 11/05-/11/14 | 575                | 985                   | 575            | 44.5      | 535     | 2236        | 147     | 0        | 0        | 0        | 147   | 27           |
| 32 L    | 2005 | MD        | 11/04-/11/13 | 600                | 838                   | 600            | 47.0      | 565     | 2452        | 149     | 0        | 0        | 0        | 149   | 26           |
| 32 L    | 2006 | MD        | 11/03-/11/12 | 450                | 767                   | 449            | 42.5      | 428     | 1872        | 94      | 0        | 0        | 0        | 94    | 22           |
| 32 L    | 2007 | MD        | 11/02-/11/11 | 600                | 692                   | 596            | 56.1      | 553     | 2251        | 165     | 0        | 0        | 0        | 165   | 30           |
| 32 L    | 2008 | MD        | 11/14-/11/20 | 450                | 355                   | 450            | 67.9      | 431     | 1708        | 100     | 0        | 0        | 0        | 100   | 23           |
| 32 T    | 2008 | WT        | 11/28-/12/04 | 460                | 161                   | 460            | 95.0      | 410     | 1513        | 0       | 0        | 117      | 0        | 117   | 29           |
| 32 E    | 2004 | WT        | 10/29-/11/01 | 650                | 383                   | 650            | 82.8      | 614     | 1851        | 0       | 0        | 251      | 0        | 251   | 41           |
| 32 E    | 2005 | WT        | 10/28-/10/31 | 650                | 450                   | 650            | 80.4      | 590     | 1790        | 0       | 0        | 198      | 0        | 198   | 34           |
| 32 E    | 2006 | WT        | 10/27-/11/01 | 650                | 501                   | 649            | 71.5      | 597     | 1999        | 0       | 0        | 202      | 0        | 202   | 34           |
| 32 E    | 2007 | WT        | 10/26-/10/31 | 650                | 428                   | 649            | 92.5      | 597     | 1999        | 0       | 0        | 186      | 0        | 186   | 31           |
| 32 E    | 2008 | WT        | 10/24-/10/30 | 500                | 387                   | 500            | 81.9      | 449     | 1508        | 0       | 0        | 156      | 0        | 156   | 35           |
| 32 M    | 2004 | WT        | 11/12-/11/21 | 800                | 576                   | 800            | 66.8      | 732     | 3059        | 0       | 0        | 280      | 0        | 280   | 38           |
| 32 M    | 2005 | WT        | 11/11-/11/20 | 800                | 615                   | 800            | 68.5      | 717     | 2757        | 0       | 0        | 228      | 0        | 228   | 32           |
| 32 M    | 2006 | WT        | 11/10-/11/19 | 650                | 463                   | 650            | 64.1      | 560     | 2341        | 0       | 0        | 169      | 0        | 169   | 30           |
| 32 M    | 2007 | WT        | 11/09-/11/18 | 650                | 406                   | 648            | 77.6      | 593     | 2631        | 0       | 0        | 156      | 0        | 156   | 26           |
| 32 M    | 2008 | WT        | 11/07-/11/13 | 500                | 260                   | 500            | 98.1      | 432     | 1626        | 0       | 0        | 123      | 0        | 123   | 28           |
| 32 L    | 2004 | WT        | 12/17-/12/31 | 100                | 1053                  | 100            | 7.2       | 91      | 366         | 0       | 0        | 64       | 0        | 64    | 70           |
| 32 L    | 2005 | WT        | 12/16-/12/31 | 100                | 830                   | 100            | 9.2       | 98      | 468         | 0       | 0        | 49       | 0        | 49    | 50           |
| 32 L    | 2006 | WT        | 12/15-/12/31 | 200                | 1144                  | 200            | 12.6      | 178     | 901         | 0       | 0        | 81       | 0        | 81    | 46           |
| 32 L    | 2007 | WT        | 12/14-/12/31 | 175                | 880                   | 175            | 14.0      | 162     | 768         | 0       | 0        | 90       | 0        | 90    | 56           |
| 32 L    | 2008 | WT        | 12/12-/12/31 | 40                 | 541                   | 40             | 5.7       | 40      | 169         | 0       | 0        | 29       | 0        | 29    | 73           |
| 33 E    | 2004 | MD        | 10/29-/11/01 | 350                | 395                   | 350            | 64.3      | 331     | 1013        | 77      | 0        | 0        | 0        | 77    | 23           |
| 33 E    | 2005 | MD        | 10/28-/10/31 | 400                | 445                   | 400            | 65.6      | 364     | 1169        | 56      | 0        | 0        | 0        | 56    | 15           |
| 33 E    | 2006 | MD        | 10/27-/11/01 | 350                | 418                   | 349            | 62.9      | 323     | 1084        | 57      | 0        | 0        | 0        | 57    | 18           |
| 33 E    | 2007 | MD        | 10/26-/10/31 | 350                | 319                   | 350            | 72.7      | 325     | 1077        | 46      | 0        | 0        | 0        | 46    | 14           |
| 33 E    | 2008 | MD        | 10/31-/11/06 | 350                | 341                   | 350            | 70.1      | 319     | 1120        | 39      | 0        | 0        | 0        | 39    | 12           |
| 33 L    | 2004 | MD        | 11/05-/11/14 | 250                | 220                   | 250            | 72.3      | 226     | 1002        | 55      | 0        | 0        | 0        | 55    | 24           |
| 33 L    | 2005 | MD        | 11/04-/11/13 | 300                | 296                   | 300            | 68.2      | 276     | 1116        | 46      | 0        | 0        | 0        | 46    | 17           |
| 33 L    | 2006 | MD        | 11/03-/11/12 | 250                | 230                   | 249            | 63.9      | 226     | 1001        | 33      | 0        | 0        | 0        | 33    | 15           |
| 33 L    | 2007 | MD        | 11/02-/11/11 | 250                | 161                   | 250            | 77.6      | 224     | 937         | 26      | 0        | 0        | 0        | 26    | 12           |
| 33 L    | 2008 | MD        | 11/14-/11/20 | 250                | 101                   | 250            | 100.0     | 241     | 945         | 23      | 0        | 0        | 0        | 23    | 10           |
| 33 T    | 2008 | WT        | 11/28-/12/04 | 650                | 400                   | 650            | 77.5      | 621     | 2204        | 0       | 0        | 208      | 0        | 208   | 33           |
| 33 E    | 2004 | WT        | 10/29-/11/01 | 700                | 442                   | 700            | 82.8      | 623     | 1693        | 0       | 0        | 275      | 0        | 275   | 44           |
| 33 E    | 2005 | WT        | 10/28-/10/31 | 750                | 599                   | 750            | 68.1      | 699     | 1898        | 0       | 0        | 281      | 0        | 281   | 40           |
| 33 E    | 2006 | WT        | 10/27-/11/01 | 725                | 837                   | 725            | 55.1      | 678     | 2112        | 0       | 0        | 269      | 0        | 269   | 40           |
| 33 E    | 2007 | WT        | 10/26-/10/31 | 750                | 786                   | 743            | 61.1      | 692     | 2244        | 0       | 0        | 265      | 0        | 265   | 38           |
| 33 E    | 2008 | WT        | 10/24-/10/30 | 650                | 956                   | 650            | 49.4      | 614     | 2113        | 0       | 0        | 272      | 0        | 272   | 44           |
| 33 M    | 2004 | WT        | 11/12-/11/21 | 700                | 552                   | 700            | 56.0      | 654     | 2568        | 0       | 0        | 276      | 0        | 276   | 42           |
| 33 M    | 2005 | WT        | 11/11-/11/20 | 750                | 677                   | 750            | 49.6      | 707     | 2719        | 0       | 0        | 316      | 0        | 316   | 45           |
| 33 M    | 2006 | WT        | 11/10-/11/19 | 725                | 837                   | 723            | 47.0      | 667     | 2847        | 0       | 0        | 244      | 0        | 244   | 37           |
| 33 M    | 2007 | WT        | 11/09-/11/18 | 750                | 799                   | 750            | 49.7      | 718     | 2955        | 0       | 0        | 260      | 0        | 260   | 36           |
| 33 M    | 2008 | WT        | 11/07-/11/13 | 650                | 452                   | 650            | 73.5      | 612     | 2231        | 0       | 0        | 223      | 0        | 223   | 36           |
| 33 L    | 2004 | WT        | 12/17-/12/31 | 100                | 1385                  | 100            | 6.4       | 91      | 336         | 0       | 0        | 58       | 0        | 58    | 64           |
| 33 L    | 2005 | WT        | 12/16-/12/31 | 100                | 1375                  | 100            | 6.1       | 96      | 416         | 0       | 0        | 47       | 0        | 47    | 49           |
| 33 L    | 2006 | WT        | 12/15-/12/31 | 150                | 1499                  | 150            | 8.5       | 142     | 717         | 0       | 0        | 80       | 0        | 80    | 56           |
| 33 L    | 2007 | WT        | 12/14-/12/31 | 150                | 1464                  | 149            | 9.2       | 143     | 637         | 0       | 0        | 95       | 0        | 95    | 66           |
| 33 L    | 2008 | WT        | 12/12-/12/31 | 40                 | 1217                  | 40             | 3.3       | 40      | 243         | 0       | 0        | 30       | 0        | 30    | 75           |
| 34A E   | 2004 | MD        | 10/29-/11/01 | 75                 | 315                   | 75             | 21.6      | 64      | 208         | 19      | 0        | 0        | 0        | 19    | 30           |
| 34A E   | 2005 | MD        | 10/28-/10/31 | 75                 | 320                   | 75             | 20.9      | 75      | 233         | 5       | 0        | 0        | 0        | 5     | 7            |
| 34A E   | 2006 | MD        | 10/27-/11/01 | 75                 | 284                   | 75             | 24.3      | 75      | 280         | 16      | 0        | 0        | 0        | 16    | 21           |
| 34A E   | 2007 | MD        | 10/26-/10/31 | 25                 | 168                   | 25             | 14.3      | 20      | 83          | 3       | 0        | 0        | 0        | 3     | 15           |
| 34A E   | 2008 | MD        | 10/31-/11/06 | 25                 | 153                   | 25             | 15.0      | 20      | 102         | 2       | 0        | 0        | 0        | 2     | 10           |
| 34A T   | 2008 | WT        | 11/28-/12/04 | 550                | 161                   | 550            | 100.0     | 515     | 2047        | 0       | 0        | 125      | 0        | 125   | 24           |
| 34A E   | 2004 | WT        | 10/29-/11/01 | 950                | 530                   | 950            | 98.1      | 872     | 2511        | 0       | 0        | 209      | 0        | 209   | 24           |
| 34A E   | 2005 | WT        | 10/28-/10/31 | 900                | 630                   | 900            | 81.1      | 851     | 2447        | 0       | 0        | 163      | 0        | 163   | 19           |
| 34A E   | 2006 | WT        | 10/27-/11/01 | 750                | 459                   | 750            | 97.8      | 689     | 2276        | 0       | 0        | 147      | 0        | 147   | 21           |

AA = Any Antlered Deer MD = Mule Deer WT = Whitetail Deer ALS = Antlerless CN = Camp Navajo FTHU = Fort Huachuca,  
C = CHAMP Hunt; in the unit column E = early or 1st season M = 2nd season T = 3rd season L = late or 4th season.



# Deer Hunt Data

## 5-Year: 2004-2008 Harvest

| Unit    | Year | Hunt Type | Dates        | Permits Authorized | 1st Choice Applicants | Permits Issued | Draw Odds | Hunters | Hunter Days | Harvest |          |          |          |       | Hunt Success |
|---------|------|-----------|--------------|--------------------|-----------------------|----------------|-----------|---------|-------------|---------|----------|----------|----------|-------|--------------|
|         |      |           |              |                    |                       |                |           |         |             | MD-Buck | MD-Aless | WT- Buck | WT-Aless | Total |              |
| GENERAL |      |           |              |                    |                       |                |           |         |             |         |          |          |          |       |              |
| 34A E   | 2007 | WT        | 10/26/-10/31 | 800                | 438                   | 800            | 97.7      | 713     | 2287        | 0       | 0        | 147      | 0        | 147   | 21           |
| 34A E   | 2008 | WT        | 10/24/-10/30 | 600                | 428                   | 600            | 93.2      | 537     | 1834        | 0       | 0        | 159      | 0        | 159   | 30           |
| 34A M   | 2004 | WT        | 11/12/-11/21 | 950                | 917                   | 950            | 67.6      | 887     | 3756        | 0       | 0        | 148      | 0        | 148   | 17           |
| 34A M   | 2005 | WT        | 11/11/-11/20 | 900                | 853                   | 900            | 73.0      | 841     | 3647        | 0       | 0        | 156      | 0        | 156   | 19           |
| 34A M   | 2006 | WT        | 11/10/-11/19 | 750                | 661                   | 749            | 71.7      | 703     | 2991        | 0       | 0        | 126      | 0        | 126   | 18           |
| 34A M   | 2007 | WT        | 11/09/-11/18 | 750                | 514                   | 750            | 88.1      | 705     | 3040        | 0       | 0        | 117      | 0        | 117   | 17           |
| 34A M   | 2008 | WT        | 11/07/-11/13 | 600                | 299                   | 600            | 98.0      | 550     | 2022        | 0       | 0        | 145      | 0        | 145   | 26           |
| 34A L   | 2004 | WT        | 12/17/-12/31 | 25                 | 635                   | 25             | 3.5       | 25      | 108         | 0       | 0        | 10       | 0        | 10    | 40           |
| 34A L   | 2005 | WT        | 12/16/-12/31 | 25                 | 533                   | 25             | 3.9       | 23      | 154         | 0       | 0        | 10       | 0        | 10    | 43           |
| 34A L   | 2006 | WT        | 12/15/-12/31 | 150                | 700                   | 150            | 16.7      | 132     | 676         | 0       | 0        | 47       | 0        | 47    | 36           |
| 34A L   | 2007 | WT        | 12/14/-12/31 | 150                | 590                   | 150            | 20.3      | 146     | 847         | 0       | 0        | 72       | 0        | 72    | 49           |
| 34A L   | 2008 | WT        | 12/12/-12/31 | 40                 | 513                   | 40             | 6.6       | 35      | 170         | 0       | 0        | 14       | 0        | 14    | 40           |
| 34B E   | 2004 | MD        | 10/29/-11/01 | 100                | 124                   | 100            | 50.8      | 94      | 287         | 19      | 0        | 0        | 0        | 19    | 20           |
| 34B E   | 2005 | MD        | 10/28/-10/31 | 100                | 181                   | 100            | 45.3      | 96      | 291         | 13      | 0        | 0        | 0        | 13    | 14           |
| 34B E   | 2006 | MD        | 10/27/-11/01 | 100                | 138                   | 98             | 55.1      | 87      | 288         | 19      | 0        | 0        | 0        | 19    | 22           |
| 34B E   | 2007 | MD        | 10/26/-10/31 | 100                | 139                   | 100            | 57.6      | 100     | 339         | 16      | 0        | 0        | 0        | 16    | 16           |
| 34B E   | 2008 | MD        | 10/31/-11/06 | 100                | 162                   | 100            | 51.9      | 96      | 327         | 23      | 0        | 0        | 0        | 23    | 24           |
| 34B L   | 2004 | MD        | 11/05/-11/14 | 100                | 233                   | 100            | 34.8      | 94      | 383         | 17      | 0        | 0        | 0        | 17    | 18           |
| 34B L   | 2005 | MD        | 11/04/-11/13 | 100                | 131                   | 100            | 59.5      | 90      | 388         | 14      | 0        | 0        | 0        | 14    | 16           |
| 34B L   | 2006 | MD        | 11/03/-11/12 | 100                | 139                   | 100            | 44.6      | 89      | 369         | 31      | 0        | 0        | 0        | 31    | 35           |
| 34B L   | 2007 | MD        | 11/02/-11/11 | 100                | 136                   | 100            | 58.1      | 93      | 347         | 40      | 0        | 0        | 0        | 40    | 43           |
| 34B L   | 2008 | MD        | 11/14/-11/20 | 100                | 108                   | 100            | 76.9      | 96      | 369         | 20      | 0        | 0        | 0        | 20    | 21           |
| 34B T   | 2008 | WT        | 11/28/-12/04 | 100                | 34                    | 100            | 100.0     | 92      | 355         | 0       | 0        | 12       | 0        | 12    | 13           |
| 34B E   | 2004 | WT        | 10/29/-11/01 | 275                | 92                    | 275            | 100.0     | 244     | 695         | 0       | 0        | 58       | 0        | 58    | 24           |
| 34B E   | 2005 | WT        | 10/28/-10/31 | 275                | 64                    | 275            | 100.0     | 228     | 689         | 0       | 0        | 32       | 0        | 32    | 14           |
| 34B E   | 2006 | WT        | 10/27/-11/01 | 175                | 47                    | 175            | 100.0     | 158     | 512         | 0       | 0        | 24       | 0        | 24    | 15           |
| 34B E   | 2007 | WT        | 10/26/-10/31 | 175                | 43                    | 175            | 100.0     | 155     | 509         | 0       | 0        | 36       | 0        | 36    | 23           |
| 34B E   | 2008 | WT        | 10/24/-10/30 | 150                | 57                    | 150            | 100.0     | 138     | 514         | 0       | 0        | 34       | 0        | 34    | 25           |
| 34B M   | 2004 | WT        | 11/12/-11/21 | 275                | 96                    | 275            | 97.9      | 251     | 965         | 0       | 0        | 28       | 0        | 28    | 11           |
| 34B M   | 2005 | WT        | 11/11/-11/20 | 275                | 104                   | 275            | 95.2      | 245     | 1036        | 0       | 0        | 21       | 0        | 21    | 9            |
| 34B M   | 2006 | WT        | 11/10/-11/19 | 200                | 67                    | 200            | 100.0     | 190     | 824         | 0       | 0        | 15       | 0        | 15    | 8            |
| 34B M   | 2007 | WT        | 11/09/-11/18 | 200                | 56                    | 200            | 100.0     | 188     | 871         | 0       | 0        | 32       | 0        | 32    | 17           |
| 34B M   | 2008 | WT        | 11/07/-11/13 | 150                | 53                    | 150            | 92.5      | 119     | 440         | 0       | 0        | 17       | 0        | 17    | 14           |
| 34B L   | 2004 | WT        | 12/17/-12/31 | 25                 | 198                   | 25             | 8.1       | 25      | 143         | 0       | 0        | 8        | 0        | 8     | 32           |
| 34B L   | 2005 | WT        | 12/16/-12/31 | 25                 | 147                   | 25             | 12.2      | 21      | 102         | 0       | 0        | 6        | 0        | 6     | 29           |
| 34B L   | 2006 | WT        | 12/15/-12/31 | 50                 | 162                   | 50             | 18.5      | 45      | 223         | 0       | 0        | 23       | 0        | 23    | 51           |
| 34B L   | 2007 | WT        | 12/14/-12/31 | 50                 | 156                   | 50             | 19.9      | 48      | 226         | 0       | 0        | 28       | 0        | 28    | 58           |
| 34B L   | 2008 | WT        | 12/12/-12/31 | 40                 | 137                   | 40             | 19.0      | 34      | 198         | 0       | 0        | 16       | 0        | 16    | 47           |
| 35A T   | 2008 | WT        | 11/28/-12/04 | 200                | 48                    | 200            | 95.8      | 187     | 778         | 0       | 0        | 52       | 0        | 52    | 28           |
| 35A E   | 2004 | WT        | 10/29/-11/01 | 300                | 111                   | 300            | 100.0     | 245     | 721         | 0       | 0        | 53       | 0        | 53    | 22           |
| 35A E   | 2005 | WT        | 10/28/-10/31 | 300                | 125                   | 300            | 100.0     | 261     | 762         | 0       | 0        | 35       | 0        | 35    | 13           |
| 35A E   | 2006 | WT        | 10/27/-11/01 | 300                | 106                   | 300            | 100.0     | 255     | 864         | 0       | 0        | 36       | 0        | 36    | 14           |
| 35A E   | 2007 | WT        | 10/26/-10/31 | 400                | 90                    | 400            | 100.0     | 358     | 1274        | 0       | 0        | 80       | 0        | 80    | 22           |
| 35A E   | 2008 | WT        | 10/24/-10/30 | 300                | 119                   | 300            | 89.1      | 275     | 1064        | 0       | 0        | 94       | 0        | 94    | 34           |
| 35A M   | 2004 | WT        | 11/12/-11/21 | 250                | 159                   | 250            | 81.1      | 222     | 953         | 0       | 0        | 36       | 0        | 36    | 16           |
| 35A M   | 2005 | WT        | 11/11/-11/20 | 250                | 143                   | 250            | 91.6      | 220     | 950         | 0       | 0        | 34       | 0        | 34    | 15           |
| 35A M   | 2006 | WT        | 11/10/-11/19 | 250                | 101                   | 250            | 95.0      | 230     | 1018        | 0       | 0        | 47       | 0        | 47    | 20           |
| 35A M   | 2007 | WT        | 11/09/-11/18 | 300                | 141                   | 300            | 95.7      | 278     | 1277        | 0       | 0        | 53       | 0        | 53    | 19           |
| 35A M   | 2008 | WT        | 11/07/-11/13 | 300                | 81                    | 300            | 100.0     | 281     | 1067        | 0       | 0        | 33       | 0        | 33    | 12           |
| 35A L   | 2004 | WT        | 12/17/-12/31 | 50                 | 273                   | 50             | 13.9      | 48      | 231         | 0       | 0        | 23       | 0        | 23    | 48           |
| 35A L   | 2005 | WT        | 12/16/-12/31 | 50                 | 284                   | 50             | 14.1      | 40      | 194         | 0       | 0        | 13       | 0        | 13    | 33           |
| 35A L   | 2006 | WT        | 12/15/-12/31 | 50                 | 214                   | 50             | 14.0      | 50      | 256         | 0       | 0        | 15       | 0        | 15    | 30           |
| 35A L   | 2007 | WT        | 12/14/-12/31 | 50                 | 203                   | 50             | 23.2      | 48      | 253         | 0       | 0        | 28       | 0        | 28    | 58           |
| 35A L   | 2008 | WT        | 12/12/-12/31 | 40                 | 271                   | 40             | 12.9      | 40      | 184         | 0       | 0        | 18       | 0        | 18    | 45           |
| 35B T   | 2008 | WT        | 11/28/-12/04 | 250                | 53                    | 251            | 98.1      | 218     | 774         | 0       | 0        | 69       | 0        | 69    | 32           |
| 35B E   | 2004 | WT        | 10/29/-11/01 | 400                | 151                   | 400            | 100.0     | 372     | 1129        | 0       | 0        | 69       | 0        | 69    | 19           |
| 35B E   | 2005 | WT        | 10/28/-10/31 | 400                | 168                   | 400            | 100.0     | 358     | 1056        | 0       | 0        | 47       | 0        | 47    | 13           |
| 35B E   | 2006 | WT        | 10/27/-11/01 | 400                | 178                   | 400            | 100.0     | 362     | 1136        | 0       | 0        | 67       | 0        | 67    | 19           |
| 35B E   | 2007 | WT        | 10/26/-10/31 | 500                | 165                   | 500            | 100.0     | 447     | 1407        | 0       | 0        | 104      | 0        | 104   | 23           |
| 35B E   | 2008 | WT        | 10/24/-10/30 | 400                | 203                   | 400            | 100.0     | 351     | 1259        | 0       | 0        | 110      | 0        | 110   | 31           |
| 35B M   | 2004 | WT        | 11/12/-11/21 | 400                | 284                   | 400            | 83.8      | 365     | 1423        | 0       | 0        | 58       | 0        | 58    | 16           |
| 35B M   | 2005 | WT        | 11/11/-11/20 | 400                | 281                   | 400            | 85.1      | 378     | 1525        | 0       | 0        | 63       | 0        | 63    | 17           |

AA = Any Antlered Deer MD = Mule Deer WT = Whitetail Deer ALS = Antlerless CN = Camp Navajo FTHU = Fort Huachuca,  
C = CHAMP Hunt; in the unit column E = early or 1st season M = 2nd season T = 3rd season L = late or 4th season.

# Deer Hunt Data

## 5-Year: 2004-2008 Harvest

| Unit    | Year | Hunt Type | Dates        | Permits Authorized | 1st Choice Applicants | Permits Issued | Draw Odds | Hunters | Hunter Days | Harvest |          |          |          |       | Hunt Success |
|---------|------|-----------|--------------|--------------------|-----------------------|----------------|-----------|---------|-------------|---------|----------|----------|----------|-------|--------------|
|         |      |           |              |                    |                       |                |           |         |             | MD-Buck | MD-Aless | WT- Buck | WT-Aless | Total |              |
| GENERAL |      |           |              |                    |                       |                |           |         |             |         |          |          |          |       |              |
| 35B M   | 2006 | WT        | 11/10/-11/19 | 400                | 312                   | 398            | 85.9      | 356     | 1526        | 0       | 0        | 59       | 0        | 59    | 17           |
| 35B M   | 2007 | WT        | 11/09/-11/18 | 450                | 237                   | 450            | 99.6      | 418     | 1694        | 0       | 0        | 82       | 0        | 82    | 20           |
| 35B M   | 2008 | WT        | 11/07/-11/13 | 400                | 185                   | 400            | 97.8      | 367     | 1427        | 0       | 0        | 83       | 0        | 83    | 23           |
| 35B L   | 2004 | WT        | 12/17/-12/31 | 50                 | 272                   | 50             | 16.2      | 42      | 197         | 0       | 0        | 13       | 0        | 13    | 31           |
| 35B L   | 2005 | WT        | 12/16/-12/31 | 50                 | 236                   | 50             | 17.4      | 48      | 188         | 0       | 0        | 25       | 0        | 25    | 52           |
| 35B L   | 2006 | WT        | 12/15/-12/31 | 50                 | 261                   | 46             | 13.0      | 46      | 260         | 0       | 0        | 14       | 0        | 14    | 30           |
| 35B L   | 2007 | WT        | 12/14/-12/31 | 50                 | 239                   | 50             | 18.0      | 43      | 198         | 0       | 0        | 15       | 0        | 15    | 35           |
| 35B L   | 2008 | WT        | 12/12/-12/31 | 40                 | 206                   | 40             | 15.5      | 40      | 170         | 0       | 0        | 15       | 0        | 15    | 38           |
| 36A E   | 2004 | MD        | 10/29/-11/01 | 300                | 541                   | 300            | 45.7      | 279     | 819         | 92      | 0        | 0        | 0        | 92    | 33           |
| 36A E   | 2005 | MD        | 10/28/-10/31 | 350                | 628                   | 350            | 47.0      | 332     | 999         | 69      | 0        | 0        | 0        | 69    | 21           |
| 36A E   | 2006 | MD        | 10/27/-11/01 | 350                | 579                   | 350            | 52.2      | 324     | 1101        | 82      | 0        | 0        | 0        | 82    | 25           |
| 36A E   | 2007 | MD        | 10/26/-10/31 | 350                | 466                   | 350            | 68.0      | 325     | 1124        | 58      | 0        | 0        | 0        | 58    | 18           |
| 36A E   | 2008 | MD        | 10/31/-11/06 | 350                | 513                   | 350            | 57.5      | 331     | 1267        | 71      | 0        | 0        | 0        | 71    | 21           |
| 36A L   | 2004 | MD        | 11/05/-11/14 | 400                | 683                   | 400            | 43.2      | 379     | 1643        | 118     | 0        | 0        | 0        | 118   | 31           |
| 36A L   | 2005 | MD        | 11/04/-11/13 | 450                | 633                   | 450            | 54.3      | 418     | 1872        | 109     | 0        | 0        | 0        | 109   | 26           |
| 36A L   | 2006 | MD        | 11/03/-11/12 | 450                | 620                   | 450            | 58.9      | 432     | 1842        | 105     | 0        | 0        | 0        | 105   | 24           |
| 36A L   | 2007 | MD        | 11/02/-11/11 | 450                | 459                   | 450            | 74.1      | 406     | 1963        | 69      | 0        | 0        | 0        | 69    | 17           |
| 36A L   | 2008 | MD        | 11/14/-11/20 | 450                | 324                   | 450            | 93.2      | 429     | 1614        | 83      | 0        | 0        | 0        | 83    | 19           |
| 36A T   | 2008 | WT        | 11/28/-12/04 | 350                | 41                    | 336            | 92.7      | 307     | 1066        | 0       | 0        | 101      | 0        | 101   | 33           |
| 36A E   | 2004 | WT        | 10/29/-11/01 | 400                | 191                   | 400            | 99.5      | 345     | 1032        | 0       | 0        | 78       | 0        | 78    | 23           |
| 36A E   | 2005 | WT        | 10/28/-10/31 | 400                | 207                   | 400            | 99.5      | 367     | 1021        | 0       | 0        | 77       | 0        | 77    | 21           |
| 36A E   | 2006 | WT        | 10/27/-11/01 | 400                | 180                   | 400            | 100.0     | 370     | 1150        | 0       | 0        | 82       | 0        | 82    | 22           |
| 36A E   | 2007 | WT        | 10/26/-10/31 | 450                | 140                   | 446            | 100.0     | 404     | 1291        | 0       | 0        | 120      | 0        | 120   | 30           |
| 36A E   | 2008 | WT        | 10/24/-10/30 | 350                | 156                   | 350            | 94.9      | 333     | 1071        | 0       | 0        | 88       | 0        | 88    | 26           |
| 36A M   | 2004 | WT        | 11/12/-11/21 | 550                | 237                   | 550            | 100.0     | 511     | 2107        | 0       | 0        | 123      | 0        | 123   | 24           |
| 36A M   | 2005 | WT        | 11/11/-11/20 | 550                | 246                   | 550            | 99.6      | 520     | 2022        | 0       | 0        | 141      | 0        | 141   | 27           |
| 36A M   | 2006 | WT        | 11/10/-11/19 | 550                | 268                   | 550            | 100.0     | 500     | 1953        | 0       | 0        | 137      | 0        | 137   | 27           |
| 36A M   | 2007 | WT        | 11/09/-11/18 | 550                | 215                   | 550            | 100.0     | 499     | 2268        | 0       | 0        | 72       | 0        | 72    | 14           |
| 36A M   | 2008 | WT        | 11/07/-11/13 | 450                | 86                    | 436            | 100.0     | 409     | 1348        | 0       | 0        | 80       | 0        | 80    | 20           |
| 36A L   | 2004 | WT        | 12/17/-12/31 | 50                 | 380                   | 50             | 10.5      | 40      | 228         | 0       | 0        | 21       | 0        | 21    | 53           |
| 36A L   | 2005 | WT        | 12/16/-12/31 | 50                 | 297                   | 50             | 11.4      | 50      | 245         | 0       | 0        | 15       | 0        | 15    | 30           |
| 36A L   | 2006 | WT        | 12/15/-12/31 | 100                | 238                   | 100            | 26.1      | 96      | 617         | 0       | 0        | 38       | 0        | 38    | 40           |
| 36A L   | 2007 | WT        | 12/14/-12/31 | 100                | 242                   | 100            | 27.3      | 91      | 441         | 0       | 0        | 35       | 0        | 35    | 38           |
| 36A L   | 2008 | WT        | 12/12/-12/31 | 40                 | 212                   | 40             | 10.4      | 37      | 265         | 0       | 0        | 15       | 0        | 15    | 41           |
| 36B E   | 2004 | MD        | 10/29/-11/01 | 100                | 307                   | 100            | 27.7      | 93      | 265         | 48      | 0        | 0        | 0        | 48    | 52           |
| 36B E   | 2005 | MD        | 10/28/-10/31 | 125                | 310                   | 125            | 31.3      | 115     | 341         | 55      | 0        | 0        | 0        | 55    | 48           |
| 36B E   | 2006 | MD        | 10/27/-11/01 | 150                | 323                   | 147            | 33.7      | 138     | 405         | 43      | 0        | 0        | 0        | 43    | 31           |
| 36B E   | 2007 | MD        | 10/26/-10/31 | 175                | 242                   | 175            | 62.8      | 167     | 574         | 51      | 0        | 0        | 0        | 51    | 31           |
| 36B E   | 2008 | MD        | 10/31/-11/06 | 200                | 304                   | 200            | 56.9      | 188     | 658         | 77      | 0        | 0        | 0        | 77    | 41           |
| 36B L   | 2004 | MD        | 11/05/-11/14 | 100                | 280                   | 100            | 30.4      | 98      | 404         | 42      | 0        | 0        | 0        | 42    | 43           |
| 36B L   | 2005 | MD        | 11/04/-11/13 | 125                | 238                   | 125            | 45.0      | 118     | 484         | 31      | 0        | 0        | 0        | 31    | 26           |
| 36B L   | 2006 | MD        | 11/03/-11/12 | 150                | 167                   | 150            | 55.1      | 147     | 631         | 58      | 0        | 0        | 0        | 58    | 39           |
| 36B L   | 2007 | MD        | 11/02/-11/11 | 225                | 214                   | 225            | 75.7      | 223     | 910         | 40      | 0        | 0        | 0        | 40    | 18           |
| 36B L   | 2008 | MD        | 11/14/-11/20 | 200                | 102                   | 200            | 94.1      | 179     | 710         | 41      | 0        | 0        | 0        | 41    | 23           |
| 36B T   | 2008 | WT        | 11/28/-12/04 | 700                | 129                   | 700            | 96.9      | 663     | 2481        | 0       | 0        | 153      | 0        | 153   | 23           |
| 36B E   | 2004 | WT        | 10/29/-11/01 | 1000               | 483                   | 1000           | 100.0     | 895     | 2559        | 0       | 0        | 210      | 0        | 210   | 23           |
| 36B E   | 2005 | WT        | 10/28/-10/31 | 1000               | 567                   | 1000           | 99.3      | 926     | 2713        | 0       | 0        | 229      | 0        | 229   | 25           |
| 36B E   | 2006 | WT        | 10/27/-11/01 | 1000               | 598                   | 1000           | 99.8      | 895     | 2946        | 0       | 0        | 202      | 0        | 202   | 23           |
| 36B E   | 2007 | WT        | 10/26/-10/31 | 1025               | 477                   | 1025           | 98.1      | 934     | 3236        | 0       | 0        | 211      | 0        | 211   | 23           |
| 36B E   | 2008 | WT        | 10/24/-10/30 | 800                | 449                   | 800            | 87.3      | 743     | 2745        | 0       | 0        | 201      | 0        | 201   | 27           |
| 36B M   | 2004 | WT        | 11/12/-11/21 | 1000               | 783                   | 1000           | 83.0      | 923     | 3988        | 0       | 0        | 190      | 0        | 190   | 21           |
| 36B M   | 2005 | WT        | 11/11/-11/20 | 1000               | 674                   | 1000           | 93.0      | 906     | 3858        | 0       | 0        | 268      | 0        | 268   | 30           |
| 36B M   | 2006 | WT        | 11/10/-11/19 | 1000               | 644                   | 998            | 93.6      | 925     | 3829        | 0       | 0        | 208      | 0        | 208   | 22           |
| 36B M   | 2007 | WT        | 11/09/-11/18 | 1025               | 571                   | 1025           | 98.2      | 946     | 4259        | 0       | 0        | 159      | 0        | 159   | 17           |
| 36B M   | 2008 | WT        | 11/07/-11/13 | 800                | 314                   | 800            | 97.1      | 735     | 2733        | 0       | 0        | 171      | 0        | 171   | 23           |
| 36B L   | 2004 | WT        | 12/17/-12/31 | 150                | 995                   | 150            | 12.3      | 138     | 581         | 0       | 0        | 50       | 0        | 50    | 36           |
| 36B L   | 2005 | WT        | 12/16/-12/31 | 150                | 828                   | 150            | 14.6      | 141     | 735         | 0       | 0        | 63       | 0        | 63    | 45           |
| 36B L   | 2006 | WT        | 12/15/-12/31 | 200                | 796                   | 200            | 17.3      | 198     | 1080        | 0       | 0        | 99       | 0        | 99    | 50           |
| 36B L   | 2007 | WT        | 12/14/-12/31 | 200                | 634                   | 200            | 24.4      | 184     | 930         | 0       | 0        | 98       | 0        | 98    | 53           |
| 36B L   | 2008 | WT        | 12/12/-12/31 | 40                 | 473                   | 40             | 6.1       | 34      | 201         | 0       | 0        | 25       | 0        | 25    | 74           |
| 36C E   | 2004 | MD        | 10/29/-11/01 | 100                | 143                   | 100            | 52.4      | 98      | 276         | 28      | 0        | 0        | 0        | 28    | 29           |
| 36C E   | 2005 | MD        | 10/28/-10/31 | 125                | 216                   | 125            | 47.7      | 120     | 340         | 35      | 0        | 0        | 0        | 35    | 29           |

AA = Any Antlered Deer MD = Mule Deer WT = Whitetail Deer ALS = Antlerless CN = Camp Navajo FTHU = Fort Huachuca,  
C = CHAMP Hunt; in the unit column E = early or 1st season M = 2nd season T = 3rd season L = late or 4th season.

# Deer Hunt Data

## 5-Year: 2004-2008 Harvest

| Unit        | Year | Hunt Type | Dates        | Permits Authorized | 1st Choice Applicants | Permits Issued | Draw Odds | Hunters | Hunter Days | Harvest |          |          |          |       | Hunt Success |
|-------------|------|-----------|--------------|--------------------|-----------------------|----------------|-----------|---------|-------------|---------|----------|----------|----------|-------|--------------|
|             |      |           |              |                    |                       |                |           |         |             | MD-Buck | MD-Aless | WT- Buck | WT-Aless | Total |              |
| GENERAL     |      |           |              |                    |                       |                |           |         |             |         |          |          |          |       |              |
| 36C E       | 2006 | MD        | 10/27/-11/01 | 100                | 224                   | 100            | 39.3      | 96      | 372         | 28      | 0        | 0        | 0        | 28    | 29           |
| 36C E       | 2007 | MD        | 10/26/-10/31 | 100                | 180                   | 100            | 48.3      | 100     | 356         | 44      | 0        | 0        | 0        | 44    | 44           |
| 36C E       | 2008 | MD        | 10/31/-11/06 | 125                | 213                   | 125            | 50.2      | 121     | 489         | 24      | 0        | 0        | 0        | 24    | 20           |
| 36C L       | 2004 | MD        | 11/05/-11/14 | 100                | 179                   | 100            | 40.8      | 100     | 420         | 50      | 0        | 0        | 0        | 50    | 50           |
| 36C L       | 2005 | MD        | 11/04/-11/13 | 125                | 235                   | 125            | 40.0      | 118     | 588         | 46      | 0        | 0        | 0        | 46    | 39           |
| 36C L       | 2006 | MD        | 11/03/-11/12 | 100                | 198                   | 100            | 40.9      | 98      | 444         | 26      | 0        | 0        | 0        | 26    | 27           |
| 36C L       | 2007 | MD        | 11/02/-11/11 | 100                | 120                   | 100            | 58.3      | 90      | 431         | 35      | 0        | 0        | 0        | 35    | 39           |
| 36C L       | 2008 | MD        | 11/14/-11/20 | 125                | 109                   | 125            | 81.7      | 115     | 461         | 25      | 0        | 0        | 0        | 25    | 22           |
| 36C T       | 2008 | WT        | 11/28/-12/04 | 150                | 42                    | 150            | 100.0     | 136     | 608         | 0       | 0        | 34       | 0        | 34    | 25           |
| 36C E       | 2004 | WT        | 10/29/-11/01 | 300                | 102                   | 300            | 100.0     | 261     | 718         | 0       | 0        | 83       | 0        | 83    | 32           |
| 36C E       | 2005 | WT        | 10/28/-10/31 | 325                | 178                   | 325            | 96.6      | 276     | 769         | 0       | 0        | 121      | 0        | 121   | 44           |
| 36C E       | 2006 | WT        | 10/27/-11/01 | 325                | 247                   | 321            | 82.6      | 297     | 906         | 0       | 0        | 90       | 0        | 90    | 30           |
| 36C E       | 2007 | WT        | 10/26/-10/31 | 350                | 154                   | 350            | 100.0     | 328     | 1109        | 0       | 0        | 91       | 0        | 91    | 28           |
| 36C E       | 2008 | WT        | 10/24/-10/30 | 200                | 102                   | 200            | 91.2      | 188     | 613         | 0       | 0        | 53       | 0        | 53    | 28           |
| 36C M       | 2004 | WT        | 11/12/-11/21 | 300                | 170                   | 300            | 78.2      | 264     | 1121        | 0       | 0        | 74       | 0        | 74    | 28           |
| 36C M       | 2005 | WT        | 11/11/-11/20 | 325                | 208                   | 325            | 82.2      | 289     | 1114        | 0       | 0        | 89       | 0        | 89    | 31           |
| 36C M       | 2006 | WT        | 11/10/-11/19 | 325                | 181                   | 325            | 86.7      | 300     | 1105        | 0       | 0        | 110      | 0        | 110   | 37           |
| 36C M       | 2007 | WT        | 11/09/-11/18 | 350                | 180                   | 350            | 93.3      | 318     | 1291        | 0       | 0        | 47       | 0        | 47    | 15           |
| 36C M       | 2008 | WT        | 11/07/-11/13 | 200                | 59                    | 202            | 100.0     | 155     | 542         | 0       | 0        | 47       | 0        | 47    | 30           |
| 36C L       | 2004 | WT        | 12/17/-12/31 | 75                 | 517                   | 75             | 10.8      | 62      | 298         | 0       | 0        | 41       | 0        | 41    | 66           |
| 36C L       | 2005 | WT        | 12/16/-12/31 | 75                 | 462                   | 75             | 11.3      | 73      | 434         | 0       | 0        | 41       | 0        | 41    | 56           |
| 36C L       | 2006 | WT        | 12/15/-12/31 | 75                 | 462                   | 75             | 13.0      | 72      | 387         | 0       | 0        | 26       | 0        | 26    | 36           |
| 36C L       | 2007 | WT        | 12/14/-12/31 | 75                 | 330                   | 75             | 18.8      | 68      | 307         | 0       | 0        | 36       | 0        | 36    | 53           |
| 36C L       | 2008 | WT        | 12/12/-12/31 | 100                | 415                   | 100            | 17.1      | 100     | 609         | 0       | 0        | 62       | 0        | 62    | 62           |
| 37A E       | 2008 | MD        | 10/31/-11/06 | 75                 | 120                   | 75             | 52.5      | 65      | 272         | 12      | 0        | 0        | 0        | 12    | 18           |
| 37A L       | 2004 | MD        | 11/05/-11/14 | 200                | 247                   | 200            | 57.5      | 190     | 905         | 28      | 0        | 0        | 0        | 28    | 15           |
| 37A L       | 2005 | MD        | 11/04/-11/13 | 200                | 247                   | 200            | 53.4      | 181     | 734         | 11      | 0        | 0        | 0        | 11    | 6            |
| 37A L       | 2006 | MD        | 11/10/-11/19 | 200                | 283                   | 197            | 51.2      | 179     | 866         | 21      | 0        | 0        | 0        | 21    | 12           |
| 37A L       | 2007 | MD        | 11/09/-11/18 | 150                | 212                   | 150            | 57.1      | 143     | 707         | 7       | 0        | 0        | 0        | 7     | 5            |
| 37A L       | 2008 | MD        | 11/14/-11/20 | 75                 | 103                   | 75             | 64.1      | 63      | 247         | 6       | 0        | 0        | 0        | 6     | 10           |
| 37B E       | 2008 | AA        | 10/31/-11/06 | 250                | 466                   | 250            | 46.4      | 243     | 924         | 52      | 0        | 2        | 0        | 54    | 22           |
| 37B L       | 2004 | AA        | 11/05/-11/14 | 500                | 1004                  | 500            | 41.9      | 471     | 2029        | 75      | 0        | 0        | 0        | 75    | 16           |
| 37B L       | 2005 | AA        | 11/04/-11/13 | 500                | 967                   | 500            | 45.0      | 467     | 2090        | 83      | 0        | 0        | 0        | 83    | 18           |
| 37B L       | 2006 | AA        | 11/10/-11/19 | 500                | 1113                  | 500            | 36.7      | 463     | 2019        | 44      | 0        | 2        | 0        | 46    | 10           |
| 37B L       | 2007 | AA        | 11/09/-11/18 | 500                | 876                   | 500            | 49.7      | 476     | 2213        | 87      | 0        | 2        | 0        | 89    | 19           |
| 37B L       | 2008 | AA        | 11/14/-11/20 | 250                | 310                   | 250            | 58.4      | 243     | 920         | 27      | 0        | 3        | 0        | 30    | 12           |
| 39/40       | 2004 | AA        | 11/05/-11/14 | 175                | 351                   | 175            | 44.4      | 159     | 656         | 18      | 0        | 0        | 0        | 18    | 11           |
| 39/40       | 2005 | AA        | 11/04/-11/13 | 250                | 450                   | 250            | 48.9      | 220     | 916         | 37      | 0        | 0        | 0        | 37    | 17           |
| 39/40       | 2006 | AA        | 11/10/-11/19 | 300                | 493                   | 300            | 50.1      | 280     | 1196        | 50      | 0        | 0        | 0        | 50    | 18           |
| 39/40       | 2007 | AA        | 11/09/-11/18 | 300                | 406                   | 300            | 60.3      | 270     | 1099        | 95      | 0        | 0        | 0        | 95    | 35           |
| 39/40 E     | 2008 | AA        | 10/31/-11/06 | 150                | 320                   | 150            | 39.7      | 138     | 499         | 23      | 0        | 0        | 0        | 23    | 17           |
| 39/40 L     | 2008 | AA        | 11/07/-11/13 | 150                | 134                   | 150            | 55.2      | 135     | 506         | 44      | 0        | 0        | 0        | 44    | 33           |
| 41          | 2004 | AA        | 11/05/-11/14 | 400                | 864                   | 400            | 41.6      | 357     | 1607        | 25      | 0        | 0        | 0        | 25    | 7            |
| 41          | 2005 | AA        | 11/04/-11/13 | 400                | 767                   | 400            | 46.2      | 374     | 1631        | 40      | 0        | 0        | 0        | 40    | 11           |
| 41          | 2006 | AA        | 11/10/-11/19 | 400                | 690                   | 400            | 49.9      | 383     | 1510        | 105     | 0        | 0        | 0        | 105   | 27           |
| 41          | 2007 | AA        | 11/09/-11/18 | 475                | 648                   | 475            | 58.2      | 429     | 2002        | 138     | 0        | 0        | 0        | 138   | 32           |
| 41          | 2008 | AA        | 11/07/-11/16 | 475                | 630                   | 475            | 62.5      | 445     | 1993        | 60      | 0        | 0        | 0        | 60    | 13           |
| 42          | 2004 | AA        | 11/05/-11/14 | 200                | 368                   | 200            | 41.3      | 189     | 831         | 27      | 0        | 0        | 0        | 27    | 14           |
| 42          | 2005 | AA        | 11/04/-11/13 | 225                | 368                   | 225            | 44.0      | 201     | 931         | 14      | 0        | 0        | 0        | 14    | 7            |
| 42          | 2006 | AA        | 11/10/-11/19 | 300                | 333                   | 300            | 63.4      | 278     | 1383        | 56      | 0        | 0        | 0        | 56    | 20           |
| 42          | 2007 | AA        | 11/02/-11/11 | 300                | 394                   | 300            | 58.9      | 280     | 1231        | 90      | 0        | 0        | 0        | 90    | 32           |
| 42          | 2008 | AA        | 11/07/-11/16 | 300                | 318                   | 300            | 65.7      | 271     | 1150        | 48      | 0        | 0        | 0        | 48    | 18           |
| 43/44       | 2004 | AA        | 11/05/-11/14 | 500                | 834                   | 500            | 47.1      | 451     | 2082        | 38      | 0        | 0        | 0        | 38    | 8            |
| 43/44       | 2005 | AA        | 11/04/-11/13 | 500                | 797                   | 500            | 52.8      | 458     | 2176        | 46      | 0        | 0        | 0        | 46    | 10           |
| 43/44       | 2006 | AA        | 11/10/-11/19 | 650                | 676                   | 650            | 74.3      | 579     | 2667        | 105     | 0        | 0        | 0        | 105   | 18           |
| 43/44       | 2007 | AA        | 11/09/-11/18 | 650                | 600                   | 650            | 80.7      | 606     | 2773        | 158     | 0        | 0        | 0        | 158   | 26           |
| 43/44       | 2008 | AA        | 11/07/-11/16 | 650                | 606                   | 650            | 84.2      | 606     | 3096        | 147     | 0        | 0        | 0        | 147   | 24           |
| 45A/45B/45C | 2004 | AA        | 11/05/-11/14 | 275                | 339                   | 275            | 61.4      | 228     | 996         | 25      | 0        | 0        | 0        | 25    | 11           |
| 45A/45B/45C | 2005 | AA        | 11/04/-11/13 | 225                | 353                   | 225            | 56.4      | 206     | 872         | 21      | 0        | 0        | 0        | 21    | 10           |
| 45A/45B/45C | 2006 | AA        | 11/10/-11/19 | 275                | 287                   | 274            | 75.3      | 230     | 969         | 46      | 0        | 0        | 0        | 46    | 20           |
| 45A/45B/45C | 2007 | AA        | 11/09/-11/18 | 275                | 253                   | 275            | 89.7      | 249     | 1126        | 54      | 0        | 0        | 0        | 54    | 22           |
| 45A/45B/45C | 2008 | AA        | 11/07/-11/16 | 275                | 257                   | 275            | 82.9      | 249     | 1062        | 32      | 0        | 0        | 0        | 32    | 13           |

AA = Any Antlered Deer MD = Mule Deer WT = Whitetail Deer ALS = Antlerless CN = Camp Navajo FTHU = Fort Huachuca,  
C = CHAMP Hunt; in the unit column E = early or 1st season M = 2nd season T = 3rd season L = late or 4th season.

# Deer Hunt Data

## 5-Year: 2004-2008 Harvest

| Unit         | Year | Hunt Type | Dates        | Permits Authorized | 1st Choice Applicants | Permits Issued | Draw Odds | Hunters | Hunter Days | Harvest |          |          |          |       | Hunt Success |
|--------------|------|-----------|--------------|--------------------|-----------------------|----------------|-----------|---------|-------------|---------|----------|----------|----------|-------|--------------|
|              |      |           |              |                    |                       |                |           |         |             | MD-Buck | MD-Aless | WT- Buck | WT-Aless | Total |              |
| GENERAL      |      |           |              |                    |                       |                |           |         |             |         |          |          |          |       |              |
| FTHU         | 2004 | AM        | 11/05/-11/16 | 10                 | 29                    | 10             | 34.5      | 9       | 29          | 6       | 0        | 0        | 0        | 6     | 67           |
| FTHU         | 2005 | AM        | 11/04/-11/15 | 10                 | 38                    | 10             | 26.3      | 10      | 41          | 5       | 0        | 0        | 0        | 5     | 50           |
| FTHU         | 2006 | AM        | 11/17/-11/25 | 10                 | 22                    | 10             | 45.5      | 10      | 38          | 7       | 0        | 0        | 0        | 7     | 70           |
| FTHU         | 2007 | AM        | 11/16/-11/25 | 10                 | 30                    | 10             | 30.0      | 8       | 20          | 8       | 0        | 0        | 0        | 8     | 100          |
| FTHU         | 2008 | AM        | 11/01/-12/31 | 10                 | 35                    | 10             | 25.7      | 8       | 47          | 3       | 0        | 0        | 0        | 3     | 38           |
| FTHU         | 2004 | AW        | 11/05/-11/16 | 85                 | 36                    | 85             | 100.0     | 76      | 437         | 0       | 0        | 16       | 0        | 16    | 21           |
| FTHU         | 2004 | AW        | 12/17/-12/30 | 120                | 92                    | 120            | 97.8      | 98      | 509         | 0       | 0        | 54       | 0        | 54    | 55           |
| FTHU         | 2005 | AW        | 11/04/-11/15 | 75                 | 47                    | 75             | 100.0     | 64      | 430         | 0       | 0        | 13       | 0        | 13    | 20           |
| FTHU         | 2005 | AW        | 12/16/-12/30 | 124                | 102                   | 124            | 98.0      | 102     | 564         | 0       | 0        | 36       | 0        | 36    | 35           |
| FTHU         | 2006 | AW        | 11/17/-11/25 | 75                 | 27                    | 68             | 100.0     | 65      | 283         | 0       | 0        | 22       | 0        | 22    | 34           |
| FTHU         | 2006 | AW        | 12/15/-12/30 | 125                | 97                    | 125            | 90.7      | 106     | 603         | 0       | 0        | 48       | 0        | 48    | 45           |
| FTHU         | 2007 | AW        | 11/16/-11/25 | 70                 | 28                    | 67             | 100.0     | 60      | 255         | 0       | 0        | 23       | 0        | 23    | 38           |
| FTHU         | 2007 | AW        | 12/14/-12/31 | 130                | 105                   | 130            | 99.0      | 127     | 741         | 0       | 0        | 72       | 0        | 72    | 57           |
| FTHU         | 2008 | AW        | 11/01/-12/31 | 70                 | 34                    | 65             | 100.0     | 63      | 241         | 0       | 0        | 27       | 0        | 27    | 43           |
| FTHU         | 2008 | AW        | 11/01/-12/31 | 130                | 112                   | 140            | 98.2      | 130     | 601         | 0       | 0        | 85       | 0        | 85    | 65           |
| FTHU CHAMP   | 2004 | DD        | 11/07/-11/18 | 10                 | 11                    | 10             | 90.9      | 9       | 17          | 3       | 3        | 3        | 0        | 9     | 100          |
| FTHU CHAMP   | 2005 | DD        | 11/04/-11/15 | 10                 | 19                    | 10             | 52.6      | 9       | 17          | 1       | 1        | 1        | 1        | 4     | 44           |
| FTHU CHAMP   | 2006 | DD        | 11/17/-11/25 | 10                 | 11                    | 10             | 90.9      | 7       | 15          | 0       | 0        | 0        | 5        | 5     | 71           |
| FTHU CHAMP   | 2007 | DD        | 11/16/-11/25 | 10                 | 11                    | 10             | 90.9      | 10      | 28          | 2       | 0        | 7        | 0        | 9     | 90           |
| JUNIORS ONLY |      |           |              |                    |                       |                |           |         |             |         |          |          |          |       |              |
| 10           | 2004 | AA        | 10/22/-10/25 | 20                 | 167                   | 20             | 10.8      | 17      | 57          | 3       | 0        | 0        | 0        | 3     | 18           |
| 10           | 2005 | AA        | 10/21/-10/24 | 20                 | 112                   | 20             | 17.9      | 20      | 60          | 3       | 0        | 0        | 0        | 3     | 15           |
| 10           | 2006 | AA        | 10/06/-10/15 | 100                | 252                   | 98             | 32.5      | 98      | 394         | 32      | 0        | 0        | 0        | 32    | 33           |
| 10           | 2007 | AA        | 10/05/-10/14 | 100                | 191                   | 100            | 39.8      | 95      | 376         | 43      | 0        | 0        | 0        | 43    | 45           |
| 10           | 2008 | AA        | 10/10/-10/19 | 100                | 186                   | 100            | 48.4      | 96      | 398         | 28      | 0        | 0        | 0        | 28    | 29           |
| 12AW         | 2004 | ALS       | 10/22/-10/25 | 500                | 931                   | 500            | 45.0      | 437     | 1059        | 0       | 225      | 0        | 0        | 225   | 51           |
| 12AW         | 2005 | ALS       | 11/11/-11/14 | 750                | 755                   | 751            | 80.9      | 653     | 1655        | 0       | 269      | 0        | 0        | 269   | 41           |
| 12AW         | 2006 | ALS       | 11/10/-11/16 | 100                | 424                   | 99             | 19.8      | 79      | 196         | 0       | 64       | 0        | 0        | 64    | 81           |
| 12AW         | 2007 | ALS       | 11/09/-11/12 | 400                | 422                   | 400            | 83.6      | 363     | 828         | 0       | 269      | 0        | 0        | 269   | 74           |
| 12AW         | 2008 | ALS       | 11/14/-11/17 | 600                | 438                   | 599            | 95.9      | 520     | 1240        | 0       | 364      | 0        | 0        | 364   | 70           |
| 16A          | 2006 | AA        | 10/06/-10/15 | 20                 | 28                    | 20             | 53.6      | 18      | 85          | 7       | 0        | 0        | 0        | 7     | 39           |
| 16A          | 2007 | AA        | 10/05/-10/14 | 20                 | 33                    | 20             | 45.5      | 18      | 58          | 4       | 0        | 0        | 0        | 4     | 22           |
| 16A          | 2008 | AA        | 10/10/-10/19 | 20                 | 24                    | 20             | 70.8      | 20      | 76          | 13      | 0        | 0        | 0        | 13    | 65           |
| 17B          | 2004 | AA        | 10/08/-10/11 | 10                 | 39                    | 10             | 15.4      | 10      | 33          | 3       | 0        | 0        | 0        | 3     | 30           |
| 17B          | 2005 | AA        | 10/07/-10/10 | 10                 | 36                    | 10             | 22.2      | 10      | 23          | 7       | 0        | 0        | 0        | 7     | 70           |
| 17B          | 2006 | AA        | 10/06/-10/15 | 60                 | 104                   | 60             | 38.5      | 52      | 170         | 16      | 0        | 0        | 0        | 16    | 31           |
| 17B          | 2007 | AA        | 10/05/-10/14 | 60                 | 63                    | 60             | 61.9      | 57      | 242         | 17      | 0        | 0        | 0        | 17    | 30           |
| 17B          | 2008 | AA        | 10/10/-10/19 | 60                 | 49                    | 60             | 79.6      | 55      | 231         | 5       | 0        | 0        | 0        | 5     | 9            |
| 18B          | 2004 | AA        | 12/17/-12/31 | 10                 | 218                   | 10             | 3.7       | 10      | 33          | 8       | 0        | 0        | 0        | 8     | 80           |
| 18B          | 2005 | AA        | 12/16/-12/31 | 10                 | 196                   | 10             | 4.6       | 10      | 27          | 7       | 0        | 0        | 0        | 7     | 70           |
| 18B          | 2006 | AA        | 11/17/-11/26 | 50                 | 95                    | 50             | 36.8      | 43      | 155         | 17      | 0        | 0        | 0        | 17    | 40           |
| 18B          | 2007 | AA        | 11/16/-11/25 | 50                 | 69                    | 50             | 53.6      | 50      | 220         | 11      | 0        | 0        | 0        | 11    | 22           |
| 18B          | 2008 | AA        | 11/21/-11/30 | 75                 | 62                    | 75             | 77.4      | 66      | 239         | 23      | 0        | 0        | 0        | 23    | 35           |
| 20A          | 2004 | AA        | 10/08/-10/11 | 10                 | 69                    | 10             | 11.6      | 10      | 27          | 5       | 0        | 0        | 0        | 5     | 50           |
| 20A          | 2005 | AA        | 10/07/-10/10 | 10                 | 75                    | 10             | 10.7      | 10      | 24          | 4       | 0        | 0        | 0        | 4     | 40           |
| 20A          | 2006 | AA        | 10/06/-10/15 | 30                 | 86                    | 30             | 30.2      | 30      | 79          | 17      | 0        | 0        | 0        | 17    | 57           |
| 20A          | 2007 | AA        | 10/05/-10/14 | 50                 | 93                    | 50             | 37.6      | 48      | 126         | 22      | 0        | 0        | 0        | 22    | 46           |
| 20A          | 2008 | AA        | 10/10/-10/19 | 100                | 111                   | 100            | 70.3      | 93      | 323         | 33      | 0        | 0        | 0        | 33    | 35           |
| 20C          | 2004 | AA        | 11/19/-11/28 | 50                 | 81                    | 50             | 48.1      | 39      | 135         | 9       | 0        | 0        | 0        | 9     | 23           |
| 20C          | 2005 | AA        | 11/18/-11/27 | 50                 | 64                    | 50             | 42.2      | 37      | 135         | 11      | 0        | 0        | 0        | 11    | 30           |
| 20C          | 2006 | AA        | 11/17/-11/26 | 100                | 105                   | 99             | 58.1      | 84      | 294         | 28      | 0        | 0        | 0        | 28    | 33           |
| 20C          | 2007 | AA        | 11/16/-11/25 | 100                | 75                    | 100            | 81.3      | 93      | 361         | 24      | 0        | 0        | 0        | 24    | 26           |
| 20C          | 2008 | AA        | 11/21/-11/30 | 100                | 66                    | 100            | 100.0     | 94      | 363         | 29      | 0        | 0        | 0        | 29    | 31           |
| 23           | 2005 | AA        | 10/21/-10/27 | 100                | 385                   | 100            | 24.2      | 91      | 277         | 13      | 0        | 6        | 0        | 19    | 21           |
| 23           | 2006 | AA        | 10/06/-10/15 | 150                | 425                   | 146            | 29.6      | 139     | 575         | 47      | 0        | 24       | 0        | 71    | 51           |
| 23           | 2007 | AA        | 10/05/-10/14 | 150                | 432                   | 150            | 30.1      | 142     | 494         | 52      | 0        | 33       | 0        | 85    | 60           |
| 23           | 2008 | AA        | 10/10/-10/16 | 150                | 409                   | 150            | 35.7      | 144     | 490         | 45      | 0        | 12       | 0        | 57    | 40           |
| 24B          | 2004 | AA        | 10/22/-10/28 | 100                | 197                   | 100            | 40.1      | 96      | 318         | 13      | 0        | 11       | 0        | 24    | 25           |
| 27           | 2004 | AA        | 10/15/-10/18 | 50                 | 316                   | 50             | 15.8      | 46      | 133         | 19      | 0        | 3        | 0        | 22    | 48           |
| 27           | 2005 | AA        | 10/14/-10/17 | 50                 | 271                   | 50             | 18.5      | 50      | 136         | 34      | 0        | 2        | 0        | 36    | 72           |
| 27           | 2006 | AA        | 10/06/-10/15 | 100                | 343                   | 100            | 26.5      | 91      | 331         | 49      | 0        | 3        | 0        | 52    | 57           |
| 27           | 2007 | AA        | 10/05/-10/14 | 100                | 325                   | 100            | 29.2      | 95      | 392         | 58      | 0        | 8        | 0        | 66    | 69           |

AA = Any Antlered Deer MD = Mule Deer WT = Whitetail Deer ALS = Antlerless CN = Camp Navajo FTHU = Fort Huachuca,  
C = CHAMP Hunt; in the unit column E = early or 1st season M = 2nd season T = 3rd season L = late or 4th season.

# Deer Hunt Data

## 5-Year: 2004-2008 Harvest

| Unit               | Year | Hunt Type | Dates        | Permits Authorized | 1st Choice Applicants | Permits Issued | Draw Odds | Hunters | Hunter Days | Harvest |          |          |          |       | Hunt Success |
|--------------------|------|-----------|--------------|--------------------|-----------------------|----------------|-----------|---------|-------------|---------|----------|----------|----------|-------|--------------|
|                    |      |           |              |                    |                       |                |           |         |             | MD-Buck | MD-Aless | WT- Buck | WT-Aless | Total |              |
| JUNIORS ONLY       |      |           |              |                    |                       |                |           |         |             |         |          |          |          |       |              |
| 27                 | 2008 | AA        | 10/10/-10/16 | 140                | 269                   | 140            | 43.9      | 128     | 370         | 63      | 0        | 15       | 0        | 78    | 61           |
| 28/29/30A<br>31/32 | 2008 | AA        | 10/10/-10/16 | 100                | 352                   | 100            | 25.3      | 97      | 292         | 48      | 0        | 19       | 0        | 67    | 69           |
| 32                 | 2004 | AA        | 11/26/-12/05 | 100                | 345                   | 100            | 25.2      | 89      | 326         | 20      | 0        | 26       | 0        | 46    | 52           |
| 32                 | 2005 | AA        | 11/25/-12/04 | 100                | 356                   | 100            | 22.5      | 95      | 300         | 21      | 0        | 13       | 0        | 34    | 36           |
| 32                 | 2006 | AA        | 11/17/-11/26 | 150                | 269                   | 150            | 46.1      | 142     | 525         | 22      | 0        | 25       | 0        | 47    | 33           |
| 32                 | 2007 | AA        | 11/16/-11/25 | 150                | 195                   | 150            | 60.5      | 144     | 551         | 36      | 0        | 27       | 0        | 63    | 44           |
| 33                 | 2006 | AA        | 11/17/-11/26 | 175                | 148                   | 175            | 76.4      | 168     | 565         | 12      | 0        | 58       | 0        | 70    | 42           |
| 33                 | 2007 | AA        | 10/05/-10/14 | 250                | 295                   | 249            | 67.8      | 234     | 766         | 12      | 0        | 132      | 0        | 144   | 62           |
| 33                 | 2008 | AA        | 10/10/-10/16 | 150                | 297                   | 150            | 43.4      | 142     | 346         | 6       | 0        | 79       | 0        | 85    | 60           |
| 33                 | 2008 | AA        | 11/21/-11/27 | 150                | 120                   | 150            | 73.3      | 144     | 468         | 2       | 0        | 28       | 0        | 30    | 21           |
| 36A                | 2005 | AA        | 11/18/-12/04 | 100                | 270                   | 100            | 32.6      | 98      | 421         | 17      | 0        | 13       | 0        | 30    | 31           |
| 36A                | 2006 | AA        | 11/17/-11/26 | 200                | 176                   | 200            | 79.0      | 186     | 742         | 18      | 0        | 38       | 0        | 56    | 30           |
| 36A                | 2007 | AA        | 11/16/-11/25 | 200                | 111                   | 200            | 94.6      | 171     | 699         | 32      | 0        | 17       | 0        | 49    | 29           |
| 36A                | 2008 | AA        | 10/10/-10/16 | 50                 | 39                    | 50             | 71.8      | 48      | 150         | 10      | 0        | 15       | 0        | 25    | 52           |
| 36A                | 2008 | AA        | 11/21/-11/27 | 150                | 61                    | 150            | 96.7      | 142     | 488         | 15      | 0        | 14       | 0        | 29    | 20           |
| 36A/36C            | 2004 | AA        | 11/19/-12/05 | 100                | 364                   | 100            | 22.5      | 94      | 302         | 33      | 0        | 14       | 0        | 47    | 50           |
| 36B                | 2008 | AA        | 11/21/-11/27 | 50                 | 29                    | 50             | 89.7      | 42      | 139         | 10      | 0        | 10       | 0        | 20    | 48           |
| 36C                | 2007 | AA        | 11/16/-11/25 | 25                 | 47                    | 25             | 42.6      | 16      | 52          | 3       | 0        | 2        | 0        | 5     | 31           |
| 42                 | 2004 | AA        | 11/19/-11/28 | 50                 | 37                    | 50             | 56.8      | 50      | 181         | 19      | 0        | 0        | 0        | 19    | 38           |
| 42                 | 2005 | AA        | 11/18/-11/27 | 50                 | 47                    | 50             | 57.4      | 48      | 145         | 14      | 0        | 0        | 0        | 14    | 29           |
| 42                 | 2006 | AA        | 11/17/-11/26 | 75                 | 43                    | 75             | 93.0      | 64      | 238         | 16      | 0        | 0        | 0        | 16    | 25           |
| 42                 | 2007 | AA        | 11/16/-11/25 | 75                 | 48                    | 75             | 89.6      | 67      | 272         | 18      | 0        | 0        | 0        | 18    | 27           |
| 42                 | 2008 | AA        | 11/21/-11/30 | 75                 | 55                    | 75             | 96.4      | 72      | 267         | 24      | 0        | 0        | 0        | 24    | 33           |
| FTHU               | 2007 | AA        | 11/10/-11/25 | 10                 | 8                     | 10             | 100.0     | 10      | 44          | 0       | 0        | 4        | 0        | 4     | 40           |
| FTHU               | 2008 | AA        | 11/08/-11/23 | 10                 | 15                    | 10             | 53.3      | 10      | 17          | 3       | 0        | 3        | 0        | 6     | 60           |
| MUZZLELOADER       |      |           |              |                    |                       |                |           |         |             |         |          |          |          |       |              |
| 03B                | 2004 | AA        | 10/29/-11/07 | 60                 | 188                   | 60             | 26.6      | 56      | 240         | 15      | 0        | 0        | 0        | 15    | 27           |
| 03B                | 2005 | AA        | 10/28/-11/06 | 60                 | 171                   | 60             | 30.4      | 56      | 247         | 18      | 0        | 2        | 0        | 20    | 36           |
| 03B                | 2006 | AA        | 11/10/-11/19 | 70                 | 166                   | 70             | 28.3      | 53      | 248         | 15      | 0        | 0        | 0        | 15    | 28           |
| 03B                | 2007 | AA        | 11/09/-11/18 | 70                 | 124                   | 70             | 44.4      | 68      | 356         | 15      | 0        | 0        | 0        | 15    | 22           |
| 03B                | 2008 | AA        | 10/31/-11/09 | 80                 | 119                   | 80             | 48.7      | 78      | 397         | 19      | 0        | 0        | 0        | 19    | 24           |
| 06B                | 2004 | AA        | 10/29/-11/01 | 150                | 197                   | 150            | 46.7      | 123     | 385         | 8       | 0        | 0        | 0        | 8     | 7            |
| 06B                | 2005 | AA        | 10/28/-10/31 | 150                | 183                   | 150            | 51.4      | 134     | 431         | 19      | 0        | 3        | 0        | 22    | 16           |
| 06B                | 2006 | AA        | 10/27/-11/05 | 190                | 243                   | 190            | 55.6      | 170     | 733         | 45      | 0        | 7        | 0        | 52    | 31           |
| 06B                | 2007 | AA        | 10/26/-11/04 | 250                | 224                   | 250            | 76.3      | 242     | 1193        | 55      | 0        | 2        | 0        | 57    | 24           |
| 06B                | 2008 | AA        | 10/24/-10/30 | 275                | 184                   | 275            | 84.8      | 253     | 1106        | 35      | 0        | 11       | 0        | 46    | 18           |
| 12AE               | 2004 | AA        | 11/12/-11/18 | 50                 | 428                   | 63             | 8.4       | 61      | 312         | 19      | 0        | 0        | 0        | 19    | 31           |
| 12AE               | 2006 | AA        | 11/10/-11/16 | 50                 | 333                   | 50             | 11.4      | 44      | 212         | 22      | 0        | 0        | 0        | 22    | 50           |
| 12AE               | 2008 | AA        | 11/14/-11/20 | 50                 | 518                   | 50             | 6.9       | 48      | 239         | 37      | 0        | 0        | 0        | 37    | 77           |
| 12B                | 2005 | AA        | 11/11/-11/17 | 35                 | 251                   | 35             | 5.6       | 33      | 143         | 22      | 0        | 0        | 0        | 22    | 67           |
| 12BW               | 2007 | AA        | 11/09/-11/18 | 35                 | 305                   | 35             | 6.9       | 35      | 188         | 32      | 0        | 0        | 0        | 32    | 91           |
| 15                 | 2004 | AA        | 10/29/-11/07 | 150                | 156                   | 150            | 64.1      | 124     | 583         | 17      | 0        | 0        | 0        | 17    | 14           |
| 15                 | 2005 | AA        | 10/28/-11/06 | 150                | 171                   | 150            | 68.4      | 138     | 668         | 35      | 0        | 0        | 0        | 35    | 25           |
| 15                 | 2006 | AA        | 10/27/-11/05 | 175                | 162                   | 175            | 77.2      | 154     | 702         | 55      | 0        | 0        | 0        | 55    | 36           |
| 15                 | 2007 | AA        | 10/26/-11/04 | 175                | 158                   | 175            | 84.8      | 158     | 762         | 47      | 0        | 0        | 0        | 47    | 30           |
| 15                 | 2008 | AA        | 10/24/-11/02 | 200                | 145                   | 200            | 100.0     | 187     | 948         | 43      | 0        | 0        | 0        | 43    | 23           |
| 20B                | 2005 | AA        | 10/28/-11/06 | 175                | 90                    | 175            | 100.0     | 145     | 509         | 23      | 0        | 0        | 0        | 23    | 16           |
| 20B                | 2006 | AA        | 10/27/-11/05 | 150                | 65                    | 150            | 100.0     | 130     | 515         | 16      | 0        | 0        | 0        | 16    | 12           |
| 20B                | 2007 | AA        | 10/26/-11/04 | 150                | 38                    | 150            | 100.0     | 132     | 569         | 18      | 0        | 0        | 0        | 18    | 14           |
| 20B                | 2008 | AA        | 10/31/-11/09 | 150                | 26                    | 150            | 100.0     | 134     | 532         | 23      | 0        | 0        | 0        | 23    | 17           |
| 24A                | 2004 | AA        | 10/29/-11/07 | 75                 | 132                   | 75             | 40.9      | 72      | 279         | 8       | 0        | 15       | 0        | 23    | 32           |
| 34A                | 2004 | AA        | 11/05/-11/14 | 100                | 114                   | 100            | 59.6      | 80      | 376         | 16      | 0        | 2        | 0        | 18    | 23           |
| 34A                | 2005 | AA        | 11/04/-11/13 | 100                | 94                    | 100            | 54.3      | 84      | 343         | 10      | 0        | 8        | 0        | 18    | 21           |
| 34A                | 2006 | AA        | 11/03/-11/12 | 100                | 106                   | 99             | 53.8      | 86      | 427         | 3       | 0        | 0        | 0        | 3     | 3            |
| 34A                | 2007 | AA        | 11/02/-11/11 | 100                | 87                    | 100            | 78.2      | 85      | 412         | 12      | 0        | 0        | 0        | 12    | 14           |
| 34A                | 2008 | AA        | 11/14/-11/20 | 100                | 65                    | 100            | 83.1      | 90      | 408         | 18      | 0        | 4        | 0        | 22    | 24           |
| 35 E               | 2004 | AA        | 11/05/-11/14 | 75                 | 64                    | 75             | 43.8      | 71      | 375         | 11      | 0        | 7        | 0        | 18    | 25           |
| 35 E               | 2005 | AA        | 11/04/-11/13 | 75                 | 54                    | 75             | 44.4      | 68      | 296         | 9       | 0        | 6        | 0        | 15    | 22           |
| 35 E               | 2006 | AA        | 11/03/-11/12 | 75                 | 29                    | 75             | 58.6      | 64      | 313         | 0       | 0        | 11       | 0        | 11    | 17           |
| 35 E               | 2007 | AA        | 11/02/-11/11 | 50                 | 29                    | 50             | 69.0      | 50      | 239         | 14      | 0        | 4        | 0        | 18    | 36           |
| 35 E               | 2008 | AA        | 10/31/-11/06 | 50                 | 39                    | 50             | 41.0      | 48      | 227         | 9       | 0        | 4        | 0        | 13    | 27           |

AA = Any Antlered Deer MD = Mule Deer WT = Whitetail Deer ALS = Antlerless CN = Camp Navajo FTHU = Fort Huachuca,  
C = CHAMP Hunt; in the unit column E = early or 1st season M = 2nd season T = 3rd season L = late or 4th season.

# Deer Hunt Data

## 5-Year: 2004-2008 Harvest

| Unit                        | Year | Hunt Type | Dates        | Permits Authorized | 1st Choice Applicants | Permits Issued | Draw Odds | Hunters | Hunter Days | Harvest |          |          |          |       | Hunt Success |
|-----------------------------|------|-----------|--------------|--------------------|-----------------------|----------------|-----------|---------|-------------|---------|----------|----------|----------|-------|--------------|
|                             |      |           |              |                    |                       |                |           |         |             | MD-Buck | MD-Aless | WT- Buck | WT-Aless | Total |              |
| MUZZLELOADER                |      |           |              |                    |                       |                |           |         |             |         |          |          |          |       |              |
| 35 L                        | 2004 | AA        | 12/17/-12/31 | 50                 | 303                   | 50             | 12.2      | 40      | 177         | 10      | 0        | 4        | 0        | 14    | 35           |
| 35 L                        | 2005 | AA        | 12/16/-12/31 | 50                 | 215                   | 52             | 18.6      | 48      | 242         | 24      | 0        | 4        | 0        | 28    | 58           |
| 35 L                        | 2006 | AA        | 12/15/-12/31 | 50                 | 209                   | 50             | 15.8      | 45      | 252         | 11      | 0        | 7        | 0        | 18    | 40           |
| 35 L                        | 2007 | AA        | 12/14/-12/31 | 50                 | 173                   | 50             | 22.5      | 47      | 279         | 18      | 0        | 7        | 0        | 25    | 53           |
| 35 L                        | 2008 | AA        | 12/12/-12/31 | 50                 | 260                   | 50             | 16.5      | 46      | 233         | 15      | 0        | 19       | 0        | 34    | 74           |
| 39/40/41/42                 | 2004 | AA        | 12/17/-12/31 | 50                 | 295                   | 50             | 12.5      | 42      | 224         | 11      | 0        | 0        | 0        | 11    | 26           |
| 39/40/41/42                 | 2005 | AA        | 12/16/-12/31 | 50                 | 250                   | 50             | 14.8      | 50      | 228         | 31      | 0        | 0        | 0        | 31    | 62           |
| 39/40/41/42                 | 2006 | AA        | 12/15/-12/31 | 50                 | 394                   | 50             | 10.2      | 47      | 239         | 18      | 0        | 0        | 0        | 18    | 38           |
| 39/40/41/42                 | 2007 | AA        | 12/14/-12/31 | 50                 | 347                   | 50             | 11.0      | 46      | 294         | 19      | 0        | 0        | 0        | 19    | 41           |
| 39/40/41/42                 | 2008 | AA        | 12/12/-12/31 | 50                 | 385                   | 50             | 10.9      | 46      | 322         | 14      | 0        | 0        | 0        | 14    | 30           |
| FTHU                        | 2004 | AA        | 12/17/-12/30 | 10                 | 19                    | 10             | 52.6      | 10      | 36          | 4       | 0        | 5        | 0        | 9     | 90           |
| FTHU                        | 2005 | AA        | 12/16/-12/30 | 12                 | 19                    | 12             | 57.9      | 12      | 82          | 2       | 0        | 0        | 0        | 2     | 17           |
| FTHU                        | 2006 | AA        | 12/15/-12/31 | 15                 | 17                    | 15             | 76.5      | 14      | 85          | 5       | 0        | 4        | 0        | 9     | 64           |
| FTHU                        | 2007 | AA        | 12/14/-12/30 | 10                 | 21                    | 10             | 38.1      | 10      | 58          | 3       | 0        | 0        | 0        | 3     | 30           |
| FTHU                        | 2008 | AA        | 10/24/-12/31 | 10                 | 17                    | 10             | 35.3      | 10      | 44          | 4       | 0        | 2        | 0        | 6     | 60           |
| MUZZLELOADER - JUNIORS ONLY |      |           |              |                    |                       |                |           |         |             |         |          |          |          |       |              |
| 16A                         | 2004 | AA        | 12/10/-12/31 | 30                 | 51                    | 30             | 29.4      | 25      | 107         | 17      | 0        | 0        | 0        | 17    | 68           |
| 16A                         | 2005 | AA        | 12/10/-12/31 | 30                 | 67                    | 30             | 28.4      | 21      | 55          | 9       | 0        | 0        | 0        | 9     | 43           |
| 16A                         | 2006 | AA        | 12/15/-12/31 | 30                 | 83                    | 30             | 30.1      | 25      | 120         | 10      | 0        | 0        | 0        | 10    | 40           |
| 16A                         | 2007 | AA        | 12/14/-12/31 | 30                 | 113                   | 30             | 23.9      | 30      | 120         | 10      | 0        | 0        | 0        | 10    | 33           |
| 16A                         | 2008 | AA        | 12/19/-12/31 | 30                 | 86                    | 30             | 29.1      | 28      | 135         | 10      | 0        | 0        | 0        | 10    | 36           |
| ARCHERY DEER – DRAW UNITS   |      |           |              |                    |                       |                |           |         |             |         |          |          |          |       |              |
| 1                           | 2008 | AA        | 8/22-9/11    | 190                | 74                    | 190            |           | 145     | 890         | 10      | 0        | 0        | 0        | 10    | 7            |
| 3A/3C                       | 2008 | AA        | 8/22-9/11    | 150                | 79                    | 150            |           | 140     | 1099        | 16      | 0        | 0        | 0        | 16    | 11           |
| 7                           | 2008 | AA        | 8/22-9/11    | 800                | 147                   | 417            |           | 355     | 1972        | 43      | 0        | 0        | 0        | 43    | 12           |
| 12A                         | 2008 | AA        | 8/22-9/11    | 1000               | 580                   | 1000           |           | 862     | 5664        | 130     | 0        | 0        | 0        | 130   | 15           |
| 12B                         | 2008 | AA        | 8/22-9/11    | 15                 | 13                    | 15             |           | 12      | 66          | -       | 0        | 0        | 0        | –     | –            |
| 12BW                        | 2008 | AA        | 8/22-9/11    | 75                 | 2                     | 65             |           | 29      | 152         | -       | 0        | 0        | 0        | –     | –            |
| 13A                         | 2008 | AA        | 8/22-9/11    | 45                 | 40                    | 45             |           | 36      | 251         | 15      | 0        | 0        | 0        | 15    | 42           |
| 13B                         | 2008 | AA        | 8/22-9/11    | 30                 | 232                   | 30             |           | 28      | 279         | 11      | 0        | 0        | 0        | 11    | 39           |

AA = Any Antlered Deer MD = Mule Deer WT = Whitetail Deer ALS = Antlerless CN = Camp Navajo FTHU = Fort Huachuca,  
C = CHAMP Hunt; in the unit column E = early or 1st season M = 2nd season T = 3rd season L = late or 4th season.



# Deer Hunt Data

5-Year: 2004-2008 Archery Deer Harvest (Over-the-Counter hunts only)

| Unit  | Year | Hunters | Hunter Days | Deer Harvest |        |           |        |       | Percent Success |
|-------|------|---------|-------------|--------------|--------|-----------|--------|-------|-----------------|
|       |      |         |             | Mule Deer    |        | Whitetail |        | Total |                 |
|       |      |         |             | Buck         | A-less | Buck      | A-less |       |                 |
| 1     | 2004 | 843     | 3627        | 36           | 0      | 0         | 0      | 36    | 4               |
| 1     | 2005 | 731     | 3100        | 13           | 0      | 0         | 0      | 13    | 2               |
| 1     | 2006 | 673     | 2953        | 18           | 0      | 0         | 0      | 18    | 3               |
| 1     | 2007 | 657     | 3136        | 19           | 0      | 0         | 0      | 19    | 3               |
| 2     | 2004 | 59      | 394         | 5            | 0      | 5         | 0      | 10    | 17              |
| 2     | 2005 | 47      | 234         | 0            | 0      | 4         | 0      | 4     | 9               |
| 2     | 2006 | 48      | 136         | 0            | 0      | 0         | 0      | 0     | 0               |
| 2     | 2007 | 38      | 278         | 0            | 0      | 0         | 0      | 0     | 0               |
| 2     | 2008 | 50      | 249         | 5            | 0      | 0         | 0      | 5     | 10              |
| 3A/3C | 2004 | 317     | 1406        | 14           | 0      | 0         | 0      | 14    | 4               |
| 3A/3C | 2005 | 293     | 1382        | 9            | 0      | 0         | 0      | 9     | 3               |
| 3A/3C | 2006 | 502     | 2139        | 13           | 0      | 0         | 0      | 13    | 3               |
| 3A/3C | 2007 | 527     | 2628        | 19           | 0      | 0         | 0      | 19    | 4               |
| 3B    | 2004 | 249     | 993         | 5            | 0      | 5         | 0      | 10    | 4               |
| 3B    | 2005 | 174     | 646         | 9            | 0      | 0         | 0      | 9     | 5               |
| 3B    | 2006 | 180     | 766         | 0            | 0      | 0         | 0      | 0     | 0               |
| 3B    | 2007 | 149     | 782         | 0            | 0      | 0         | 0      | 0     | 0               |
| 3B    | 2008 | 181     | 960         | 9            | 0      | 0         | 0      | 9     | 5               |
| 4     | 2004 | 512     | 1832        | 0            | 0      | 0         | 0      | 0     | 0               |
| 4     | 2005 | 302     | 1250        | 0            | 0      | 0         | 0      | 0     | 0               |
| 4     | 2006 | 414     | 1466        | 4            | 0      | 0         | 0      | 4     | 1               |
| 4     | 2007 | 288     | 1050        | 0            | 0      | 0         | 0      | 0     | 0               |
| 4     | 2008 | 448     | 1947        | 9            | 0      | 5         | 0      | 14    | 3               |
| 5     | 2004 | 1084    | 4969        | 32           | 0      | 0         | 0      | 32    | 3               |
| 5     | 2005 | 872     | 3980        | 13           | 0      | 0         | 0      | 13    | 1               |
| 5     | 2006 | 990     | 4397        | 13           | 0      | 0         | 0      | 13    | 1               |
| 5     | 2007 | 873     | 3807        | 0            | 0      | 5         | 0      | 5     | 1               |
| 5     | 2008 | 779     | 3540        | 0            | 0      | 0         | 0      | 0     | 0               |
| 6A    | 2004 | 1533    | 6379        | 23           | 0      | 5         | 0      | 28    | 2               |
| 6A    | 2005 | 1191    | 5328        | 21           | 0      | 4         | 0      | 25    | 2               |
| 6A    | 2006 | 1259    | 5761        | 4            | 0      | 4         | 0      | 8     | 1               |
| 6A    | 2007 | 1357    | 5620        | 23           | 0      | 6         | 0      | 29    | 2               |
| 6A    | 2008 | 1413    | 6383        | 18           | 0      | 18        | 0      | 36    | 3               |
| 6B    | 2004 | 336     | 1492        | 9            | 0      | 0         | 0      | 9     | 3               |
| 6B    | 2005 | 310     | 1182        | 9            | 0      | 0         | 0      | 9     | 3               |
| 6B    | 2006 | 343     | 1391        | 4            | 0      | 0         | 0      | 4     | 1               |
| 6B    | 2007 | 503     | 2297        | 5            | 0      | 5         | 0      | 10    | 2               |
| 6B    | 2008 | 430     | 2182        | 5            | 0      | 0         | 0      | 5     | 1               |
| 7     | 2004 | 1025    | 4783        | 36           | 0      | 0         | 0      | 36    | 4               |
| 7     | 2005 | 1038    | 4622        | 30           | 0      | 0         | 0      | 30    | 3               |
| 7     | 2006 | 1268    | 5977        | 57           | 0      | 0         | 0      | 57    | 4               |
| 7     | 2007 | 1367    | 6948        | 38           | 0      | 5         | 0      | 43    | 3               |
| 7M    | 2004 | 181     | 839         | 18           | 0      | 0         | 0      | 18    | 10              |
| 7M    | 2005 | 234     | 1233        | 4            | 0      | 0         | 0      | 4     | 2               |
| 8     | 2004 | 585     | 2707        | 0            | 0      | 0         | 0      | 0     | 0               |
| 8     | 2005 | 685     | 2960        | 11           | 0      | 5         | 0      | 16    | 2               |
| 8     | 2006 | 651     | 2764        | 4            | 0      | 0         | 0      | 4     | 1               |
| 8     | 2007 | 623     | 2752        | 10           | 0      | 5         | 0      | 15    | 2               |
| 8     | 2008 | 679     | 3060        | 0            | 0      | 5         | 0      | 5     | 1               |
| 9     | 2004 | 141     | 612         | 9            | 0      | 0         | 0      | 9     | 6               |
| 9     | 2005 | 145     | 727         | 0            | 0      | 0         | 0      | 0     | 0               |
| 9     | 2006 | 167     | 678         | 4            | 0      | 0         | 0      | 4     | 2               |
| 9     | 2007 | 163     | 609         | 0            | 0      | 0         | 0      | 0     | 0               |
| 9     | 2008 | 172     | 629         | 0            | 0      | 0         | 0      | 0     | 0               |
| 10    | 2004 | 880     | 3899        | 9            | 0      | 0         | 0      | 9     | 1               |
| 10    | 2005 | 957     | 4669        | 30           | 0      | 0         | 0      | 30    | 3               |
| 10    | 2006 | 1021    | 5018        | 9            | 0      | 0         | 0      | 9     | 1               |
| 10    | 2007 | 844     | 4277        | 14           | 0      | 0         | 0      | 14    | 2               |
| 10    | 2008 | 706     | 3133        | 14           | 0      | 0         | 0      | 14    | 2               |
| 11M   | 2006 | 277     | 1004        | 9            | 0      | 0         | 0      | 9     | 3               |
| 11M   | 2007 | 479     | 2297        | 19           | 0      | 0         | 0      | 19    | 4               |
| 11M   | 2008 | 326     | 1888        | 5            | 0      | 0         | 0      | 5     | 2               |

Note: 2008 data is preliminary



# Deer Hunt Data

## 5-Year: 2004-2008 Archery Deer Harvest (Over-the-Counter hunts only)

| Unit    | Year | Hunters | Hunter Days | Deer Harvest |        |           |        |       | Percent Success |
|---------|------|---------|-------------|--------------|--------|-----------|--------|-------|-----------------|
|         |      |         |             | Mule Deer    |        | Whitetail |        | Total |                 |
|         |      |         |             | Buck         | A-less | Buck      | A-less |       |                 |
| 12A     | 2004 | 2208    | 11503       | 172          | 0      | 5         | 0      | 177   | 8               |
| 12A     | 2005 | 1705    | 8998        | 106          | 0      | 0         | 0      | 106   | 6               |
| 12A     | 2006 | 1391    | 7949        | 158          | 0      | 0         | 0      | 158   | 11              |
| 12A     | 2007 | 1362    | 7710        | 110          | 0      | 0         | 0      | 110   | 8               |
| 12B     | 2004 | 131     | 653         | 0            | 0      | 0         | 0      | 0     | 0               |
| 12B     | 2005 | 81      | 251         | 0            | 0      | 0         | 0      | 0     | 0               |
| 12B     | 2006 | 62      | 238         | 4            | 0      | 0         | 0      | 4     | 6               |
| 12B     | 2007 | 58      | 225         | 5            | 0      | 0         | 0      | 5     | 9               |
| 13A     | 2004 | 231     | 1297        | 14           | 0      | 0         | 0      | 14    | 6               |
| 13A     | 2005 | 145     | 578         | 4            | 0      | 0         | 0      | 4     | 3               |
| 13A     | 2006 | 97      | 546         | 13           | 0      | 0         | 0      | 13    | 13              |
| 13A     | 2007 | 105     | 633         | 14           | 0      | 0         | 0      | 14    | 13              |
| 15A/15B | 2004 | 172     | 1034        | 0            | 0      | 0         | 0      | 0     | 0               |
| 15A/15B | 2005 | 234     | 1327        | 21           | 0      | 0         | 0      | 21    | 9               |
| 15A/15B | 2006 | 286     | 1695        | 48           | 0      | 0         | 0      | 48    | 17              |
| 15A/15B | 2007 | 245     | 1486        | 19           | 0      | 0         | 0      | 19    | 8               |
| 15A/15B | 2008 | 163     | 874         | 5            | 0      | 0         | 0      | 5     | 3               |
| 15C/15D | 2004 | 14      | 63          | 0            | 0      | 0         | 0      | 0     | 0               |
| 15C/15D | 2005 | 26      | 132         | 4            | 0      | 0         | 0      | 4     | 15              |
| 15C/15D | 2006 | 26      | 84          | 0            | 0      | 0         | 0      | 0     | 0               |
| 15C/15D | 2007 | 10      | 34          | 0            | 0      | 0         | 0      | 0     | 0               |
| 15C/15D | 2008 | 9       | 23          | 5            | 0      | 0         | 0      | 5     | 56              |
| 16A     | 2004 | 240     | 1056        | 5            | 0      | 0         | 0      | 5     | 2               |
| 16A     | 2005 | 187     | 1021        | 4            | 0      | 0         | 0      | 4     | 2               |
| 16A     | 2006 | 207     | 849         | 9            | 0      | 4         | 0      | 13    | 6               |
| 16A     | 2007 | 264     | 1400        | 10           | 0      | 0         | 0      | 10    | 4               |
| 16A     | 2008 | 181     | 711         | 9            | 0      | 0         | 0      | 9     | 5               |
| 17A     | 2004 | 417     | 1818        | 5            | 0      | 0         | 0      | 5     | 1               |
| 17A     | 2005 | 404     | 2139        | 21           | 0      | 0         | 0      | 21    | 5               |
| 17A     | 2006 | 484     | 1937        | 35           | 0      | 0         | 0      | 35    | 7               |
| 17A     | 2007 | 393     | 2134        | 5            | 0      | 0         | 0      | 5     | 1               |
| 17A     | 2008 | 272     | 1177        | 14           | 0      | 0         | 0      | 14    | 5               |
| 17B     | 2004 | 394     | 1877        | 9            | 0      | 0         | 0      | 9     | 2               |
| 17B     | 2005 | 446     | 2330        | 4            | 0      | 4         | 0      | 8     | 2               |
| 17B     | 2006 | 603     | 2905        | 26           | 0      | 0         | 0      | 26    | 4               |
| 17B     | 2007 | 412     | 1726        | 24           | 0      | 0         | 0      | 24    | 6               |
| 17B     | 2008 | 462     | 2150        | 18           | 0      | 0         | 0      | 18    | 4               |
| 18A     | 2004 | 286     | 1111        | 9            | 0      | 0         | 0      | 9     | 3               |
| 18A     | 2005 | 327     | 1399        | 9            | 0      | 0         | 0      | 9     | 3               |
| 18A     | 2006 | 335     | 1549        | 4            | 0      | 0         | 0      | 4     | 1               |
| 18A     | 2007 | 393     | 1889        | 5            | 0      | 0         | 0      | 5     | 1               |
| 18A     | 2008 | 217     | 1041        | 5            | 0      | 0         | 0      | 5     | 2               |
| 18B     | 2004 | 218     | 907         | 0            | 0      | 0         | 0      | 0     | 0               |
| 18B     | 2005 | 332     | 1522        | 0            | 0      | 0         | 0      | 0     | 0               |
| 18B     | 2006 | 365     | 1725        | 4            | 0      | 0         | 0      | 4     | 1               |
| 18B     | 2007 | 355     | 1649        | 5            | 0      | 0         | 0      | 5     | 1               |
| 18B     | 2008 | 281     | 1471        | 14           | 0      | 0         | 0      | 14    | 5               |
| 19A     | 2004 | 263     | 1161        | 0            | 0      | 0         | 0      | 0     | 0               |
| 19A     | 2005 | 213     | 1046        | 4            | 0      | 0         | 0      | 4     | 2               |
| 19A     | 2006 | 251     | 1039        | 4            | 0      | 0         | 0      | 4     | 2               |
| 19A     | 2007 | 235     | 1012        | 10           | 0      | 0         | 0      | 10    | 4               |
| 19A     | 2008 | 317     | 1499        | 9            | 0      | 0         | 0      | 9     | 3               |
| 19B     | 2004 | 240     | 975         | 5            | 0      | 0         | 0      | 5     | 2               |
| 19B     | 2005 | 213     | 940         | 0            | 0      | 0         | 0      | 0     | 0               |
| 19B     | 2006 | 255     | 1272        | 4            | 0      | 0         | 0      | 4     | 2               |
| 19B     | 2007 | 230     | 1156        | 5            | 0      | 0         | 0      | 5     | 2               |
| 19B     | 2008 | 231     | 996         | 9            | 0      | 0         | 0      | 9     | 4               |
| 20A     | 2004 | 1047    | 5717        | 50           | 0      | 0         | 0      | 50    | 5               |
| 20A     | 2005 | 906     | 5451        | 55           | 0      | 0         | 0      | 55    | 6               |
| 20A     | 2006 | 1017    | 5687        | 62           | 0      | 0         | 0      | 62    | 6               |
| 20A     | 2007 | 906     | 5433        | 53           | 0      | 0         | 0      | 53    | 6               |

Note: 2008 data is preliminary

# Deer Hunt Data

## 5-Year: 2004-2008 Archery Deer Harvest (Over-the-Counter hunts only)

| Unit | Year | Hunters | Hunter Days | Deer Harvest |        |           |        |       | Percent Success |
|------|------|---------|-------------|--------------|--------|-----------|--------|-------|-----------------|
|      |      |         |             | Mule Deer    |        | Whitetail |        | Total |                 |
|      |      |         |             | Buck         | A-less | Buck      | A-less |       |                 |
| 20A  | 2008 | 593     | 3088        | 5            | 0      | 0         | 0      | 5     | 1               |
| 20B  | 2004 | 367     | 1347        | 9            | 0      | 0         | 0      | 9     | 2               |
| 20B  | 2005 | 421     | 1947        | 9            | 0      | 0         | 0      | 9     | 2               |
| 20B  | 2006 | 374     | 1567        | 4            | 0      | 0         | 0      | 4     | 1               |
| 20B  | 2007 | 451     | 2100        | 0            | 0      | 0         | 0      | 0     | 0               |
| 20B  | 2008 | 353     | 1254        | 0            | 0      | 0         | 0      | 0     | 0               |
| 20C  | 2004 | 286     | 1433        | 14           | 0      | 0         | 0      | 14    | 5               |
| 20C  | 2005 | 319     | 1752        | 26           | 0      | 0         | 0      | 26    | 8               |
| 20C  | 2006 | 352     | 1796        | 0            | 0      | 0         | 0      | 0     | 0               |
| 20C  | 2007 | 340     | 1928        | 10           | 0      | 0         | 0      | 10    | 3               |
| 20C  | 2008 | 258     | 1236        | 23           | 0      | 0         | 0      | 23    | 9               |
| 21   | 2004 | 671     | 3160        | 5            | 0      | 0         | 0      | 5     | 1               |
| 21   | 2005 | 685     | 2972        | 21           | 0      | 0         | 0      | 21    | 3               |
| 21   | 2006 | 766     | 2808        | 9            | 0      | 4         | 0      | 13    | 2               |
| 21   | 2007 | 921     | 4090        | 24           | 0      | 0         | 0      | 24    | 3               |
| 21   | 2008 | 982     | 4699        | 9            | 0      | 14        | 0      | 23    | 2               |
| 22   | 2004 | 1256    | 6085        | 9            | 0      | 27        | 0      | 36    | 3               |
| 22   | 2005 | 1399    | 7463        | 18           | 0      | 67        | 0      | 85    | 6               |
| 22   | 2006 | 1690    | 8688        | 18           | 0      | 97        | 0      | 115   | 7               |
| 22   | 2007 | 1601    | 8137        | 0            | 0      | 53        | 0      | 53    | 3               |
| 22   | 2008 | 1023    | 4360        | 0            | 0      | 32        | 0      | 32    | 3               |
| 23   | 2004 | 1247    | 5808        | 32           | 0      | 54        | 0      | 86    | 7               |
| 23   | 2005 | 1373    | 7008        | 34           | 0      | 30        | 0      | 64    | 5               |
| 23   | 2006 | 1774    | 8332        | 64           | 0      | 37        | 0      | 101   | 6               |
| 23   | 2007 | 1525    | 7748        | 34           | 0      | 34        | 0      | 68    | 4               |
| 23   | 2008 | 1250    | 6175        | 9            | 0      | 36        | 0      | 45    | 4               |
| 24A  | 2004 | 476     | 2743        | 0            | 0      | 14        | 0      | 14    | 3               |
| 24A  | 2005 | 532     | 2832        | 13           | 0      | 13        | 0      | 26    | 5               |
| 24A  | 2006 | 700     | 3534        | 4            | 0      | 35        | 0      | 39    | 6               |
| 24A  | 2007 | 561     | 3121        | 10           | 0      | 19        | 0      | 29    | 5               |
| 24A  | 2008 | 697     | 3789        | 18           | 0      | 18        | 0      | 36    | 5               |
| 24B  | 2004 | 494     | 2802        | 0            | 0      | 0         | 0      | 0     | 0               |
| 24B  | 2005 | 604     | 3210        | 0            | 0      | 9         | 0      | 9     | 1               |
| 24B  | 2006 | 612     | 2975        | 9            | 0      | 9         | 0      | 18    | 3               |
| 24B  | 2007 | 623     | 3414        | 5            | 0      | 5         | 0      | 10    | 2               |
| 24B  | 2008 | 697     | 3672        | 18           | 0      | 5         | 0      | 23    | 3               |
| 25M  | 2007 | 14      | 43          | 0            | 0      | 0         | 0      | 0     | 0               |
| 25M  | 2008 | 5       | 23          | 0            | 0      | 0         | 0      | 0     | 0               |
| 26M  | 2006 | 44      | 110         | 0            | 0      | 0         | 0      | 0     | 0               |
| 26M  | 2007 | 139     | 671         | 10           | 0      | 0         | 0      | 10    | 7               |
| 26M  | 2008 | 91      | 611         | 9            | 0      | 0         | 0      | 9     | 10              |
| 27   | 2004 | 766     | 3138        | 41           | 0      | 14        | 0      | 55    | 7               |
| 27   | 2005 | 761     | 3355        | 17           | 0      | 13        | 0      | 30    | 4               |
| 27   | 2006 | 775     | 3719        | 31           | 0      | 13        | 0      | 44    | 6               |
| 27   | 2007 | 595     | 3016        | 29           | 0      | 19        | 0      | 48    | 8               |
| 27   | 2008 | 688     | 3165        | 36           | 0      | 27        | 0      | 63    | 9               |
| 28   | 2004 | 227     | 857         | 0            | 0      | 0         | 0      | 0     | 0               |
| 28   | 2005 | 247     | 1072        | 9            | 0      | 0         | 0      | 9     | 4               |
| 28   | 2006 | 277     | 1351        | 4            | 0      | 0         | 0      | 4     | 1               |
| 28   | 2007 | 302     | 1654        | 19           | 0      | 0         | 0      | 19    | 6               |
| 28   | 2008 | 303     | 1494        | 9            | 0      | 5         | 0      | 14    | 5               |
| 29   | 2004 | 186     | 934         | 5            | 0      | 9         | 0      | 14    | 8               |
| 29   | 2005 | 327     | 1646        | 0            | 0      | 26        | 0      | 26    | 8               |
| 29   | 2006 | 326     | 1743        | 4            | 0      | 18        | 0      | 22    | 7               |
| 29   | 2007 | 302     | 1884        | 10           | 0      | 24        | 0      | 34    | 11              |
| 29   | 2008 | 244     | 1286        | 14           | 0      | 23        | 0      | 37    | 15              |
| 30A  | 2004 | 272     | 1333        | 23           | 0      | 9         | 0      | 32    | 12              |
| 30A  | 2005 | 323     | 1684        | 13           | 0      | 4         | 0      | 17    | 5               |
| 30A  | 2006 | 335     | 1739        | 4            | 0      | 18        | 0      | 22    | 7               |
| 30A  | 2007 | 273     | 1621        | 5            | 0      | 5         | 0      | 10    | 4               |
| 30A  | 2008 | 222     | 1222        | 14           | 0      | 14        | 0      | 28    | 13              |

Note: 2008 data is preliminary

## Deer Hunt Data

*5-Year: 2004-2008 Archery Deer Harvest (Over-the-Counter hunts only)*

| Unit | Year | Hunters | Hunter Days | Deer Harvest |        |           |        |       | Percent Success |
|------|------|---------|-------------|--------------|--------|-----------|--------|-------|-----------------|
|      |      |         |             | Mule Deer    |        | Whitetail |        | Total |                 |
|      |      |         |             | Buck         | A-less | Buck      | A-less |       |                 |
| 30B  | 2004 | 290     | 1886        | 9            | 0      | 9         | 0      | 18    | 6               |
| 30B  | 2005 | 323     | 2062        | 13           | 0      | 9         | 0      | 22    | 7               |
| 30B  | 2006 | 357     | 2157        | 4            | 0      | 0         | 0      | 4     | 1               |
| 30B  | 2007 | 360     | 2445        | 10           | 0      | 5         | 0      | 15    | 4               |
| 30B  | 2008 | 299     | 1566        | 14           | 0      | 9         | 0      | 23    | 8               |
| 31   | 2004 | 535     | 2779        | 14           | 0      | 9         | 0      | 23    | 4               |
| 31   | 2005 | 472     | 2186        | 0            | 0      | 13        | 0      | 13    | 3               |
| 31   | 2006 | 528     | 2482        | 13           | 0      | 18        | 0      | 31    | 6               |
| 31   | 2007 | 432     | 2143        | 24           | 0      | 5         | 0      | 29    | 7               |
| 31   | 2008 | 453     | 2286        | 14           | 0      | 18        | 0      | 32    | 7               |
| 32   | 2004 | 757     | 3537        | 14           | 0      | 36        | 0      | 50    | 7               |
| 32   | 2005 | 812     | 3784        | 10           | 0      | 15        | 0      | 25    | 3               |
| 32   | 2006 | 845     | 3741        | 13           | 0      | 13        | 0      | 26    | 3               |
| 32   | 2007 | 782     | 3730        | 19           | 0      | 10        | 0      | 29    | 4               |
| 32   | 2008 | 566     | 2712        | 12           | 0      | 6         | 0      | 18    | 3               |
| 33   | 2004 | 952     | 5250        | 18           | 0      | 0         | 0      | 18    | 2               |
| 33   | 2005 | 1310    | 7458        | 9            | 0      | 37        | 0      | 46    | 4               |
| 33   | 2006 | 1413    | 7350        | 19           | 0      | 34        | 0      | 53    | 4               |
| 33   | 2007 | 1429    | 7542        | 38           | 0      | 53        | 0      | 91    | 6               |
| 33   | 2008 | 1204    | 6221        | 23           | 0      | 81        | 0      | 104   | 9               |
| 34A  | 2004 | 975     | 5835        | 32           | 0      | 23        | 0      | 55    | 6               |
| 34A  | 2005 | 1131    | 6544        | 39           | 0      | 33        | 0      | 72    | 6               |
| 34A  | 2006 | 1144    | 6083        | 31           | 0      | 18        | 0      | 49    | 4               |
| 34A  | 2007 | 1103    | 6478        | 24           | 0      | 48        | 0      | 72    | 7               |
| 34A  | 2008 | 933     | 5632        | 18           | 0      | 14        | 0      | 32    | 3               |
| 34B  | 2004 | 326     | 1505        | 5            | 0      | 0         | 0      | 5     | 2               |
| 34B  | 2005 | 366     | 1799        | 9            | 0      | 0         | 0      | 9     | 2               |
| 34B  | 2006 | 493     | 2152        | 18           | 0      | 0         | 0      | 18    | 4               |
| 34B  | 2007 | 350     | 1971        | 5            | 0      | 0         | 0      | 5     | 1               |
| 34B  | 2008 | 326     | 1639        | 5            | 0      | 5         | 0      | 10    | 3               |
| 35A  | 2004 | 367     | 2204        | 5            | 0      | 9         | 0      | 14    | 4               |
| 35A  | 2005 | 446     | 2981        | 4            | 0      | 30        | 0      | 34    | 8               |
| 35A  | 2006 | 431     | 2760        | 0            | 0      | 26        | 0      | 26    | 6               |
| 35A  | 2007 | 417     | 3328        | 5            | 0      | 19        | 0      | 24    | 6               |
| 35A  | 2008 | 403     | 2531        | 9            | 0      | 45        | 0      | 54    | 13              |
| 35B  | 2004 | 190     | 812         | 9            | 0      | 5         | 0      | 14    | 7               |
| 35B  | 2005 | 217     | 1046        | 4            | 0      | 13        | 0      | 17    | 8               |
| 35B  | 2006 | 233     | 924         | 0            | 0      | 13        | 0      | 13    | 6               |
| 35B  | 2007 | 235     | 1501        | 0            | 0      | 38        | 0      | 38    | 16              |
| 35B  | 2008 | 199     | 1499        | 14           | 0      | 18        | 0      | 32    | 16              |
| 36A  | 2004 | 943     | 5604        | 14           | 0      | 14        | 0      | 28    | 3               |
| 36A  | 2005 | 1191    | 7144        | 31           | 0      | 20        | 0      | 51    | 4               |
| 36A  | 2006 | 1034    | 5563        | 31           | 0      | 18        | 0      | 49    | 5               |
| 36A  | 2007 | 964     | 5226        | 34           | 0      | 14        | 0      | 48    | 5               |
| 36A  | 2008 | 878     | 4505        | 45           | 0      | 9         | 0      | 54    | 6               |
| 36B  | 2004 | 721     | 3709        | 5            | 0      | 0         | 0      | 5     | 1               |
| 36B  | 2005 | 833     | 4410        | 36           | 0      | 15        | 0      | 51    | 6               |
| 36B  | 2006 | 889     | 4195        | 40           | 0      | 18        | 0      | 58    | 7               |
| 36B  | 2007 | 786     | 4028        | 37           | 0      | 16        | 0      | 53    | 7               |
| 36B  | 2008 | 738     | 3486        | 9            | 0      | 14        | 0      | 23    | 3               |
| 36C  | 2004 | 490     | 2457        | 27           | 0      | 5         | 0      | 32    | 7               |
| 36C  | 2005 | 515     | 2636        | 13           | 0      | 13        | 0      | 26    | 5               |
| 36C  | 2006 | 585     | 2685        | 0            | 0      | 9         | 0      | 9     | 2               |
| 36C  | 2007 | 441     | 2316        | 10           | 0      | 0         | 0      | 10    | 2               |
| 36C  | 2008 | 521     | 2639        | 0            | 0      | 0         | 0      | 0     | 0               |
| 37A  | 2004 | 295     | 1619        | 5            | 0      | 0         | 0      | 5     | 2               |
| 37A  | 2005 | 336     | 1841        | 9            | 0      | 0         | 0      | 9     | 3               |
| 37A  | 2006 | 383     | 1756        | 13           | 0      | 0         | 0      | 13    | 3               |
| 37A  | 2007 | 408     | 2095        | 0            | 0      | 0         | 0      | 0     | 0               |
| 37A  | 2008 | 244     | 1141        | 9            | 0      | 0         | 0      | 9     | 4               |
| 37B  | 2004 | 390     | 2371        | 0            | 0      | 5         | 0      | 5     | 1               |

Note: 2008 data is preliminary

# Deer Hunt Data

5-Year: 2004-2008 Archery Deer Harvest (Over-the-Counter hunts only)

| Unit    | Year | Hunters | Hunter Days | Deer Harvest |        |           |        |       | Percent Success |
|---------|------|---------|-------------|--------------|--------|-----------|--------|-------|-----------------|
|         |      |         |             | Mule Deer    |        | Whitetail |        | Total |                 |
|         |      |         |             | Buck         | A-less | Buck      | A-less |       |                 |
| 37B     | 2005 | 583     | 2602        | 9            | 0      | 0         | 0      | 9     | 2               |
| 37B     | 2006 | 621     | 3006        | 0            | 0      | 0         | 0      | 0     | 0               |
| 37B     | 2007 | 537     | 2412        | 0            | 0      | 0         | 0      | 0     | 0               |
| 37B     | 2008 | 512     | 2639        | 0            | 0      | 0         | 0      | 0     | 0               |
| 38M     | 2004 | 145     | 889         | 14           | 0      | 0         | 0      | 14    | 10              |
| 38M     | 2005 | 327     | 2020        | 17           | 0      | 0         | 0      | 17    | 5               |
| 38M     | 2006 | 281     | 1770        | 17           | 0      | 4         | 0      | 21    | 7               |
| 38M     | 2007 | 288     | 2115        | 24           | 0      | 0         | 0      | 24    | 8               |
| 38M     | 2008 | 236     | 1675        | 23           | 0      | 0         | 0      | 23    | 10              |
| 39/40   | 2004 | 113     | 576         | 0            | 0      | 0         | 0      | 0     | 0               |
| 39/40   | 2005 | 132     | 1033        | 13           | 0      | 0         | 0      | 13    | 10              |
| 39/40   | 2006 | 185     | 1021        | 9            | 0      | 0         | 0      | 9     | 5               |
| 39/40   | 2007 | 206     | 1146        | 14           | 0      | 0         | 0      | 14    | 7               |
| 39/40   | 2008 | 177     | 905         | 14           | 0      | 0         | 0      | 14    | 8               |
| 39M     | 2005 | 21      | 149         | 0            | 0      | 0         | 0      | 0     | 0               |
| 41      | 2004 | 131     | 748         | 0            | 0      | 0         | 0      | 0     | 0               |
| 41      | 2005 | 170     | 893         | 4            | 0      | 0         | 0      | 4     | 2               |
| 41      | 2006 | 273     | 1329        | 4            | 0      | 0         | 0      | 4     | 1               |
| 41      | 2007 | 283     | 1530        | 14           | 0      | 0         | 0      | 14    | 5               |
| 41      | 2008 | 294     | 1947        | 9            | 0      | 0         | 0      | 9     | 3               |
| 42      | 2004 | 394     | 2562        | 0            | 0      | 0         | 0      | 0     | 0               |
| 42      | 2005 | 395     | 2475        | 34           | 0      | 0         | 0      | 34    | 9               |
| 42      | 2006 | 445     | 2267        | 22           | 0      | 0         | 0      | 22    | 5               |
| 42      | 2007 | 551     | 3658        | 29           | 0      | 0         | 0      | 29    | 5               |
| 42      | 2008 | 330     | 2178        | 5            | 0      | 0         | 0      | 5     | 2               |
| 42M     | 2004 | 86      | 458         | 0            | 0      | 0         | 0      | 0     | 0               |
| 42M     | 2005 | 128     | 714         | 0            | 0      | 0         | 0      | 0     | 0               |
| 42M     | 2006 | 40      | 216         | 0            | 0      | 0         | 0      | 0     | 0               |
| 42M     | 2008 | 9       | 18          | 0            | 0      | 0         | 0      | 0     | 0               |
| 43/44   | 2004 | 163     | 667         | 0            | 0      | 0         | 0      | 0     | 0               |
| 43/44   | 2005 | 157     | 748         | 4            | 0      | 0         | 0      | 4     | 3               |
| 43/44   | 2006 | 224     | 1268        | 40           | 0      | 0         | 0      | 40    | 18              |
| 43/44   | 2007 | 192     | 1189        | 0            | 0      | 0         | 0      | 0     | 0               |
| 43/44   | 2008 | 131     | 706         | 0            | 0      | 0         | 0      | 0     | 0               |
| 45      | 2004 | 41      | 277         | 0            | 0      | 0         | 0      | 0     | 0               |
| 45      | 2005 | 43      | 315         | 0            | 0      | 0         | 0      | 0     | 0               |
| 45      | 2006 | 35      | 154         | 4            | 0      | 0         | 0      | 4     | 11              |
| 45      | 2007 | 62      | 187         | 10           | 0      | 0         | 0      | 10    | 16              |
| 45      | 2008 | 27      | 149         | 9            | 0      | 0         | 0      | 9     | 33              |
| 46A     | 2006 | 4       | 13          | 0            | 0      | 0         | 0      | 0     | 0               |
| 46B     | 2006 | 9       | 35          | 0            | 0      | 0         | 0      | 0     | 0               |
| 47M     | 2006 | 44      | 158         | 0            | 0      | 0         | 0      | 0     | 0               |
| 47M     | 2007 | 72      | 374         | 5            | 0      | 0         | 0      | 5     | 7               |
| 47M     | 2008 | 45      | 199         | 0            | 0      | 0         | 0      | 0     | 0               |
| Unknown | 2004 | 104     | 367         | 5            | 0      | 0         | 0      | 5     | 5               |
| Unknown | 2005 | 115     | 519         | 4            | 0      | 0         | 0      | 4     | 3               |
| Unknown | 2006 | 88      | 515         | 0            | 0      | 0         | 0      | 0     | 0               |
| Unknown | 2007 | 38      | 86          | 0            | 0      | 0         | 0      | 0     | 0               |
| Unknown | 2008 | 54      | 371         | 0            | 0      | 0         | 0      | 0     | 0               |

Note: 2008 data is preliminary

---

# Pronghorn Antelope (*Antilocapra americana*)

---

## *Natural History*

Pronghorn antelope are native to the prairies of North America. At one time they numbered in the millions and were found from the Mississippi River to the Pacific Ocean, and from central Canada to Mexico. With the European settlement of the plains, the population was reduced nearly to extinction. In Arizona, antelope persisted primarily in the northern plains. They also inhabit high elevation meadows between forested areas, and scattered herds are again found in the grasslands of southeastern Arizona. The endangered Sonoran pronghorn is restricted to the extreme desert lands of southwestern Arizona and northern Sonora, Mexico. The statewide population of pronghorn is estimated at 7,800 post-hunt adults.

The name pronghorn comes from the sharply pointed prong on the horn of the buck antelope. The doe's horns, if present at all, are smaller and more slender. Antelope have true horns in that the horny tissue is composed of fused hairs, which form over a bony core. Horn length reaches maximum size during the summer before the outer sheaths are shed, usually sometime in the fall.

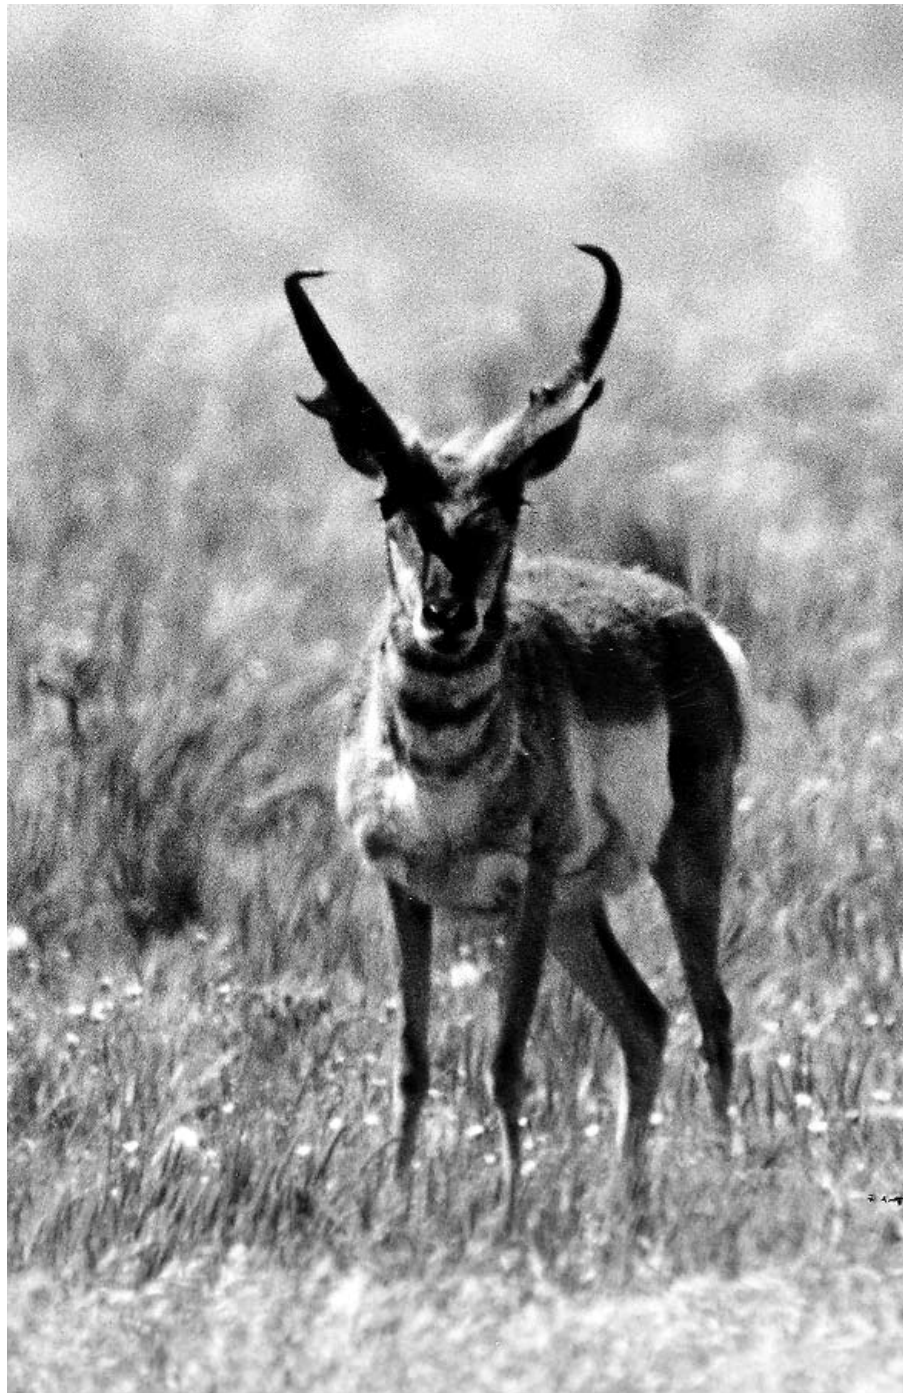

GEORGE ANDREIKO

Antelope have exceptional eyesight, which is often compared to high-powered binoculars. These “prairie goats” are also one of the fastest mammals, being able to run in excess of 60 mph. Despite their speed, antelope are reluctant to jump over objects, preferring to crawl under or through fences rather than leap over them.

A conspicuous characteristic of the antelope is the white rump patch. When an animal is alarmed, its rump hairs stand erect and appear as a white flash that can be seen for miles. The dominant body color is an apricot tan, with sharply contrasting white markings on the belly, head, and neck. The top of the buck’s muzzle is brown or black, and below the ear he will usually have a triangular black cheek patch, which is lacking on the doe. A short mane is present along the top of the

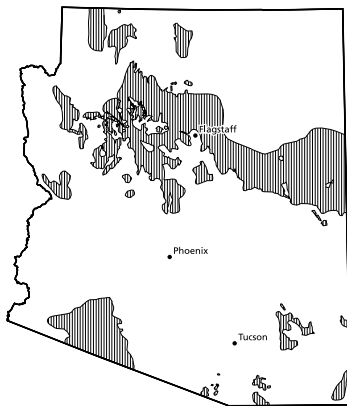

**Antelope distribution**

neck. Shedding is continuous, with the individual hairs being loosely attached to the skin, making the hide nearly worthless. Since the hairs are hollow and can be erected at will, prong-horns are able to adjust to great extremes in temperature. Adult bucks usually weigh between 90 and 120 pounds. The does are about 20 pounds lighter. Antelope are primarily browsers, feeding mostly on weeds and short browse plants, with grass being only a minor food source. Because of Arizona’s mild winters, antelope tend to live longer than the six- to eight-year average life span of their northern cousins, one reason that a disproportionate number of Arizona bucks are trophy animals with horns in excess of 15 inches in length.

Antelope are gregarious and usually seen in mixed herds, except in the spring when the bucks are alone or in small bachelor groups. Later, in the summer and early fall, these same bucks will collect harems of does, which may number up to 15 animals, which they then

defend from other bucks. Antelope breed in August and September, and the young are born in May and June. A doe will typically produce one or two fawns. The young are not spotted like the fawns of the deer family, but instead have markings similar to those of adults. The fawns remain hidden, with the doe feeding them several times a day, until they are about two to three weeks old and strong enough to travel with the adults. During this time, pronghorn fawns, or “kids,” are the most vulnerable to coyotes, which may take 75 percent or more of the year’s production. Adult antelope are taken by mountain lions, as well as by coyotes.

### *Hunt History*

Once second only to deer as a game animal, Arizona’s antelope were first given a closed season in 1893. The response must have been less than satisfactory, however, as the season was completely closed in 1905. By 1922, the state’s antelope population was estimated to be less than 1,000 animals.

Then, for reasons that still are not fully understood, pronghorn antelope began to make a comeback. Aided by a closed season, government predator control programs, and the abandonment of numerous homesteads, pronghorn numbers steadily increased until fears were expressed that some northern Arizona populations were in danger of exceeding their food supply. Accordingly, a limited hunt of 400 buck permits was authorized for northern Arizona in 1941.

After a closed season from 1944 to 1948, antelope hunting in Arizona recommenced in 1949. Hunts were liberalized gradually, until 1954 when 1,600 permits were issued and 1,146 bucks were taken. Despite the issuance of a number of antlerless antelope permits between 1961 and 1975, this level of harvest has never again been equaled. Annual harvests since 1990 have varied between 500 and 700 bucks, with archers taking a proportionally larger percent of the harvest in recent years. Plagued by encroaching subdivisions, increasing highway construction, and other land-use changes, maintaining even the present number of antelope is dependent on citizen involvement and an aggressive translocation program. Approximately 10 percent of the 1998 antelope harvest was in areas having reintroduced herds.

## Pronghorn Antelope Survey Data

### *Historic Summary of Antelope Survey Data*

| Year | Bucks | Does | Fawns | Unclassified | Total | Bucks/100 Does | Fawns/100 Does |
|------|-------|------|-------|--------------|-------|----------------|----------------|
| 1948 | 943   | 1944 | 1536  | 0            | 4423  | 49             | 79             |
| 1949 | 1302  | 2153 | 1397  | 0            | 4852  | 60             | 65             |
| 1950 | 1208  | 2280 | 1550  | 0            | 5038  | 53             | 68             |
| 1951 | 1134  | 2007 | 1089  | 0            | 4230  | 57             | 54             |
| 1952 | 1130  | 2312 | 1840  | 0            | 5282  | 49             | 80             |
| 1953 | 1119  | 2230 | 1040  | 0            | 4389  | 50             | 47             |
| 1954 | 1098  | 2086 | 1344  | 0            | 4528  | 53             | 64             |
| 1955 | 1148  | 2283 | 969   | 0            | 4400  | 50             | 42             |
| 1956 | 862   | 2056 | 891   | 0            | 3809  | 42             | 43             |
| 1957 | 782   | 2169 | 806   | 0            | 3757  | 36             | 37             |
| 1958 | 819   | 2396 | 1096  | 0            | 4311  | 34             | 46             |
| 1959 | 994   | 2545 | 1631  | 0            | 5170  | 39             | 64             |
| 1960 | 1006  | 2745 | 1689  | 0            | 5440  | 37             | 62             |
| 1961 | 835   | 2180 | 1067  | 123          | 4205  | 38             | 49             |
| 1962 | 817   | 2711 | 1158  | 37           | 4723  | 30             | 43             |
| 1963 | 893   | 2699 | 1386  | 30           | 5008  | 33             | 51             |
| 1964 | 874   | 2905 | 1410  | 12           | 5201  | 30             | 49             |
| 1965 | 1014  | 2948 | 1040  | 0            | 5002  | 34             | 35             |
| 1966 | 969   | 2851 | 1181  | 44           | 5045  | 34             | 41             |
| 1967 | 1060  | 3086 | 1329  | 22           | 5497  | 34             | 43             |
| 1968 | 590   | 2249 | 938   | 0            | 3777  | 26             | 42             |
| 1969 | 799   | 2472 | 1053  | 2            | 4326  | 32             | 43             |
| 1970 | 866   | 2730 | 1728  | 1            | 5325  | 32             | 63             |
| 1971 | 993   | 2559 | 636   | 2            | 4190  | 39             | 25             |
| 1972 | 749   | 2028 | 841   | 23           | 3641  | 37             | 41             |
| 1973 | 1211  | 3005 | 1275  | 14           | 5505  | 40             | 42             |
| 1974 | 1006  | 2878 | 941   | 6            | 4831  | 35             | 33             |
| 1975 | 910   | 2926 | 1086  | 0            | 4922  | 31             | 37             |
| 1976 | 950   | 3347 | 932   | 1            | 5230  | 28             | 28             |
| 1977 | 936   | 3177 | 727   | 0            | 4840  | 29             | 23             |
| 1978 | 937   | 3473 | 1352  | 0            | 5762  | 27             | 39             |
| 1979 | 1071  | 3706 | 1204  | 1            | 5982  | 29             | 32             |
| 1980 | 1190  | 3750 | 1173  | 0            | 6113  | 32             | 31             |
| 1981 | 1292  | 3833 | 899   | 0            | 6024  | 34             | 23             |
| 1982 | 1029  | 3388 | 1300  | 5            | 5722  | 30             | 38             |
| 1983 | 1157  | 3753 | 1471  | 3            | 6384  | 31             | 39             |
| 1984 | 1264  | 3611 | 1190  | 12           | 6077  | 35             | 33             |
| 1985 | 1563  | 4881 | 1477  | 1            | 7922  | 32             | 30             |
| 1986 | 1800  | 5327 | 1610  | 0            | 8737  | 34             | 30             |
| 1987 | 1685  | 5249 | 1632  | 2            | 8568  | 32             | 31             |
| 1988 | 1915  | 6013 | 1413  | 0            | 9341  | 32             | 24             |
| 1989 | 1572  | 4967 | 1131  | 4            | 7674  | 32             | 23             |
| 1990 | 1731  | 5738 | 1323  | 3            | 8795  | 30             | 23             |
| 1991 | 1581  | 5326 | 1825  | 9            | 8741  | 30             | 34             |
| 1992 | 1916  | 5663 | 1831  | 1            | 9411  | 34             | 32             |
| 1993 | 2133  | 6187 | 2294  | 34           | 10648 | 34             | 37             |
| 1994 | 2019  | 5809 | 1427  | 0            | 9255  | 35             | 25             |
| 1995 | 2236  | 6638 | 1787  | 14           | 10675 | 34             | 27             |
| 1996 | 2036  | 5498 | 435   | 7            | 7976  | 37             | 8              |
| 1997 | 1998  | 6426 | 2037  | 28           | 10489 | 31             | 32             |
| 1998 | 1997  | 6152 | 1651  | 11           | 9811  | 32             | 27             |
| 1999 | 1814  | 5420 | 1076  | 8            | 8318  | 33             | 20             |
| 2000 | 1455  | 4453 | 1002  | 7            | 6917  | 33             | 23             |
| 2001 | 1739  | 5702 | 1773  | 15           | 9229  | 31             | 31             |
| 2002 | 1503  | 4305 | 353   | 8            | 6169  | 35             | 8              |
| 2003 | 1313  | 4484 | 1459  | 1            | 7257  | 29             | 33             |
| 2004 | 1353  | 4502 | 1494  | 1            | 7350  | 30             | 33             |
| 2005 | 1292  | 3626 | 1485  | 16           | 6419  | 36             | 41             |
| 2006 | 1205  | 3006 | 596   | 16           | 4823  | 40             | 40             |
| 2007 | 952   | 2778 | 620   | 16           | 4366  | 34             | 22             |
| 2008 | 1014  | 2816 | 538   | 12           | 4380  | 36             | 19             |



# Pronghorn Antelope Survey Data

## 5-year: 2004-2008 Antelope Survey Data

| Unit | Year | Bucks | Does | Fawns | Unclassified | Total | Bucks/100 Does | Fawns/100 Does |
|------|------|-------|------|-------|--------------|-------|----------------|----------------|
| 1    | 2004 | 69    | 274  | 63    | 0            | 406   | 25             | 23             |
| 1    | 2005 | 80    | 263  | 52    | 0            | 395   | 30             | 20             |
| 1    | 2006 | 68    | 205  | 21    | 0            | 294   | 33             | 10             |
| 1    | 2007 | 55    | 218  | 37    | 0            | 310   | 25             | 17             |
| 1    | 2008 | 48    | 160  | 29    | 1            | 238   | 30             | 18             |
| 2A   | 2004 | 33    | 115  | 21    | 1            | 170   | 29             | 18             |
| 2A   | 2006 | 49    | 162  | 20    | 10           | 241   | 30             | 12             |
| 2A   | 2007 | 60    | 149  | 26    | 2            | 237   | 40             | 17             |
| 2A   | 2008 | 33    | 121  | 7     | 0            | 161   | 27             | 6              |
| 2B   | 2004 | 46    | 140  | 27    | 0            | 213   | 33             | 19             |
| 2B   | 2005 | 42    | 119  | 14    | 0            | 175   | 35             | 12             |
| 2B   | 2006 | 21    | 91   | 9     | 0            | 121   | 23             | 10             |
| 2B   | 2007 | 16    | 105  | 29    | 2            | 152   | 15             | 28             |
| 2B   | 2008 | 35    | 125  | 17    | 0            | 177   | 28             | 14             |
| 2C   | 2004 | 49    | 237  | 13    | 0            | 299   | 21             | 5              |
| 2C   | 2005 | 48    | 269  | 58    | 0            | 375   | 18             | 22             |
| 2C   | 2006 | 32    | 241  | 46    | 0            | 319   | 13             | 19             |
| 2C   | 2007 | 15    | 129  | 29    | 0            | 173   | 12             | 22             |
| 2C   | 2008 | 14    | 79   | 12    | 0            | 105   | 18             | 15             |
| 3A   | 2004 | 61    | 183  | 29    | 0            | 273   | 33             | 16             |
| 3A   | 2005 | 47    | 141  | 63    | 0            | 251   | 33             | 45             |
| 3A   | 2006 | 66    | 111  | 14    | 0            | 191   | 59             | 13             |
| 3A   | 2007 | 29    | 84   | 15    | 0            | 128   | 35             | 18             |
| 3A   | 2008 | 34    | 150  | 26    | 0            | 210   | 23             | 17             |
| 3B   | 2004 | 23    | 121  | 20    | 0            | 164   | 19             | 17             |
| 3B   | 2005 | 19    | 110  | 27    | 0            | 156   | 17             | 25             |
| 3B   | 2006 | 18    | 78   | 17    | 0            | 113   | 23             | 22             |
| 3B   | 2007 | 21    | 73   | 9     | 0            | 103   | 29             | 12             |
| 3B   | 2008 | 10    | 46   | 9     | 0            | 65    | 22             | 20             |
| 3C   | 2004 | 13    | 68   | 16    | 0            | 97    | 19             | 24             |
| 3C   | 2005 | 19    | 65   | 20    | 0            | 104   | 29             | 31             |
| 3C   | 2006 | 26    | 72   | 27    | 0            | 125   | 36             | 38             |
| 3C   | 2007 | 15    | 65   | 7     | 0            | 87    | 23             | 11             |
| 3C   | 2008 | 5     | 53   | 7     | 0            | 65    | 9              | 13             |
| 4A   | 2004 | 56    | 245  | 54    | 0            | 355   | 23             | 22             |
| 4A   | 2005 | 21    | 137  | 49    | 0            | 207   | 15             | 36             |
| 4A   | 2006 | 45    | 166  | 11    | 0            | 222   | 27             | 7              |
| 4A   | 2007 | 56    | 210  | 55    | 0            | 321   | 27             | 26             |
| 4A   | 2008 | 61    | 173  | 14    | 0            | 248   | 35             | 8              |
| 4B   | 2004 | 52    | 200  | 42    | 0            | 294   | 26             | 21             |
| 4B   | 2005 | 23    | 137  | 66    | 0            | 226   | 17             | 48             |
| 4B   | 2006 | 32    | 60   | 14    | 0            | 106   | 53             | 23             |
| 4B   | 2007 | 24    | 95   | 27    | 0            | 146   | 25             | 28             |
| 4B   | 2008 | 18    | 81   | 12    | 1            | 112   | 22             | 15             |
| 5A   | 2004 | 36    | 79   | 27    | 0            | 142   | 46             | 34             |
| 5A   | 2005 | 15    | 38   | 15    | 0            | 68    | 39             | 39             |
| 5A   | 2006 | 9     | 22   | 1     | 0            | 32    | 41             | 5              |
| 5A   | 2007 | 23    | 61   | 22    | 0            | 106   | 38             | 36             |
| 5A   | 2008 | 37    | 57   | 15    | 0            | 109   | 65             | 26             |
| 5B   | 2004 | 61    | 164  | 74    | 0            | 299   | 37             | 45             |
| 5B   | 2005 | 36    | 99   | 36    | 0            | 171   | 36             | 36             |
| 5B   | 2006 | 33    | 109  | 20    | 2            | 164   | 30             | 18             |
| 5B   | 2007 | 77    | 142  | 47    | 0            | 266   | 54             | 33             |
| 5B   | 2008 | 83    | 152  | 23    | 0            | 258   | 55             | 15             |
| 6A   | 2004 | 11    | 33   | 13    | 0            | 57    | 33             | 39             |
| 6A   | 2005 | 4     | 11   | 7     | 0            | 22    | 36             | 64             |
| 6A   | 2006 | 6     | 14   | 11    | 0            | 31    | 43             | 79             |
| 6A   | 2007 | 2     | 5    | 4     | 0            | 11    | 40             | 80             |
| 6A   | 2008 | 6     | 6    | 1     | 0            | 13    | 100            | 17             |
| 6B   | 2004 | 4     | 23   | 10    | 0            | 37    | 17             | 43             |
| 6B   | 2005 | 10    | 15   | 4     | 0            | 29    | 67             | 27             |
| 6B   | 2006 | 4     | 20   | 4     | 0            | 28    | 20             | 20             |
| 6B   | 2007 | 7     | 19   | 3     | 0            | 29    | 37             | 16             |
| 6B   | 2008 | 5     | 25   | 3     | 0            | 33    | 20             | 12             |

## Pronghorn Antelope Survey Data

### 5-year: 2004-2008 Antelope Survey Data

| Unit    | Year | Bucks | Does | Fawns | Unclassified | Total | Bucks/100 Does | Fawns/100 Does |
|---------|------|-------|------|-------|--------------|-------|----------------|----------------|
| 7       | 2004 | 43    | 168  | 74    | 0            | 285   | 26             | 44             |
| 7       | 2005 | 33    | 108  | 60    | 0            | 201   | 31             | 56             |
| 7       | 2006 | 73    | 93   | 22    | 0            | 188   | 78             | 24             |
| 7       | 2007 | 32    | 98   | 21    | 2            | 153   | 33             | 21             |
| 7       | 2008 | 70    | 177  | 58    | 0            | 305   | 40             | 33             |
| 8       | 2004 | 37    | 103  | 58    | 0            | 198   | 36             | 56             |
| 8       | 2005 | 22    | 101  | 55    | 2            | 180   | 22             | 54             |
| 8       | 2006 | 26    | 55   | 30    | 0            | 111   | 47             | 55             |
| 8       | 2007 | 24    | 95   | 30    | 0            | 149   | 25             | 32             |
| 8       | 2008 | 18    | 115  | 19    | 0            | 152   | 16             | 17             |
| 9       | 2004 | 31    | 95   | 31    | 0            | 157   | 33             | 33             |
| 9       | 2005 | 33    | 67   | 30    | 0            | 130   | 49             | 45             |
| 9       | 2006 | 12    | 62   | 8     | 0            | 82    | 19             | 13             |
| 9       | 2007 | 42    | 61   | 27    | 2            | 132   | 69             | 44             |
| 9       | 2008 | 30    | 85   | 23    | 0            | 138   | 35             | 27             |
| 10      | 2004 | 134   | 412  | 134   | 0            | 680   | 33             | 33             |
| 10      | 2005 | 128   | 285  | 131   | 5            | 549   | 45             | 46             |
| 10      | 2006 | 126   | 324  | 56    | 0            | 506   | 39             | 17             |
| 10      | 2007 | 44    | 89   | 10    | 0            | 143   | 49             | 11             |
| 10      | 2008 | 35    | 117  | 25    | 0            | 177   | 30             | 21             |
| 12      | 2004 | 7     | 37   | 4     | 0            | 48    | 19             | 11             |
| 12      | 2005 | 5     | 32   | 19    | 0            | 56    | 16             | 59             |
| 12A/12B | 2006 | 12    | 37   | 4     | 0            | 53    | 32             | 11             |
| 12A/12B | 2007 | 9     | 36   | 11    | 0            | 56    | 25             | 31             |
| 12A/12B | 2008 | 3     | 14   | 3     | 0            | 20    | 21             | 21             |
| 13A     | 2004 | 49    | 192  | 117   | 0            | 358   | 26             | 61             |
| 13A     | 2005 | 36    | 179  | 115   | 0            | 330   | 20             | 64             |
| 13A     | 2006 | 44    | 148  | 29    | 0            | 221   | 30             | 20             |
| 13A     | 2007 | 40    | 137  | 7     | 0            | 184   | 29             | 5              |
| 13A     | 2008 | 15    | 79   | 6     | 1            | 101   | 19             | 8              |
| 13B     | 2004 | 18    | 57   | 29    | 0            | 104   | 32             | 51             |
| 13B     | 2005 | 19    | 35   | 21    | 9            | 84    | 54             | 60             |
| 13B     | 2006 | 21    | 34   | 13    | 0            | 68    | 62             | 38             |
| 13B     | 2007 | 21    | 52   | 2     | 0            | 75    | 40             | 4              |
| 13B     | 2008 | 18    | 47   | 17    | 0            | 82    | 38             | 36             |
| 15A/15B | 2004 | 14    | 19   | 11    | 0            | 44    | 74             | 58             |
| 15A/15B | 2005 | 19    | 3    | 1     | 0            | 23    | 633            | 33             |
| 15A/15B | 2006 | 2     | 5    | 4     | 1            | 12    | 40             | 80             |
| 15A/15B | 2007 | 5     | 25   | 4     | 1            | 35    | 20             | 16             |
| 15A/15B | 2008 | 3     | 12   | 2     | 0            | 17    | 25             | 17             |
| 17A     | 2004 | 4     | 11   | 9     | 0            | 24    | 36             | 82             |
| 17A     | 2005 | 32    | 47   | 22    | 0            | 101   | 68             | 47             |
| 17A     | 2006 | 11    | 2    | 1     | 0            | 14    | 550            | 50             |
| 17A     | 2007 | 2     | 18   | 1     | 0            | 21    | 11             | 6              |
| 17A     | 2008 | 10    | 50   | 3     | 0            | 63    | 20             | 6              |
| 17B     | 2004 | 44    | 92   | 41    | 0            | 177   | 48             | 45             |
| 17B     | 2005 | 79    | 64   | 27    | 0            | 170   | 123            | 42             |
| 17B     | 2006 | 78    | 74   | 12    | 0            | 164   | 105            | 16             |
| 17B     | 2007 | 30    | 55   | 2     | 0            | 87    | 55             | 4              |
| 17B     | 2008 | 33    | 33   | 2     | 0            | 68    | 100            | 6              |
| 18A     | 2004 | 69    | 200  | 71    | 0            | 340   | 35             | 36             |
| 18A     | 2005 | 59    | 209  | 71    | 0            | 339   | 28             | 34             |
| 18A     | 2006 | 42    | 89   | 20    | 0            | 151   | 47             | 22             |
| 18A     | 2007 | 7     | 72   | 4     | 3            | 86    | 10             | 6              |
| 18A     | 2008 | 10    | 68   | 5     | 0            | 83    | 15             | 7              |
| 18B     | 2004 | 47    | 174  | 70    | 0            | 291   | 27             | 40             |
| 18B     | 2005 | 50    | 148  | 74    | 0            | 272   | 34             | 50             |
| 18B     | 2006 | 40    | 157  | 39    | 0            | 236   | 25             | 25             |
| 18B     | 2007 | 25    | 49   | 13    | 0            | 87    | 51             | 27             |
| 18B     | 2008 | 44    | 146  | 58    | 0            | 248   | 30             | 40             |
| 19A     | 2004 | 144   | 393  | 193   | 0            | 730   | 37             | 49             |
| 19A     | 2005 | 166   | 337  | 215   | 0            | 718   | 49             | 64             |
| 19A     | 2006 | 86    | 155  | 52    | 0            | 293   | 55             | 34             |
| 19A     | 2007 | 75    | 156  | 51    | 0            | 282   | 48             | 33             |

## Pronghorn Antelope Survey Data

### *5-year: 2004-2008 Antelope Survey Data*

| Unit  | Year | Bucks | Does | Fawns | Unclassified | Total | Bucks/100 Does | Fawns/100 Does |
|-------|------|-------|------|-------|--------------|-------|----------------|----------------|
| 19A   | 2008 | 117   | 156  | 66    | 0            | 339   | 75             | 42             |
| 19B   | 2004 | 90    | 342  | 140   | 0            | 572   | 26             | 41             |
| 19B   | 2005 | 135   | 280  | 92    | 0            | 507   | 48             | 33             |
| 19B   | 2006 | 105   | 143  | 26    | 3            | 277   | 73             | 18             |
| 19B   | 2007 | 108   | 245  | 17    | 0            | 370   | 44             | 7              |
| 19B   | 2008 | 98    | 221  | 22    | 0            | 341   | 44             | 10             |
| 21    | 2004 | 22    | 54   | 29    | 0            | 105   | 41             | 54             |
| 21    | 2005 | 19    | 55   | 21    | 0            | 95    | 35             | 38             |
| 21    | 2006 | 27    | 82   | 36    | 0            | 145   | 33             | 44             |
| 21    | 2007 | 15    | 47   | 30    | 0            | 92    | 32             | 64             |
| 21    | 2008 | 15    | 38   | 13    | 9            | 75    | 39             | 34             |
| 27    | 2004 | 12    | 15   | 11    | 0            | 38    | 80             | 73             |
| 27    | 2005 | 8     | 21   | 6     | 0            | 35    | 38             | 29             |
| 27    | 2006 | 5     | 11   | 1     | 0            | 17    | 45             | 9              |
| 27    | 2007 | 10    | 16   | 6     | 0            | 32    | 63             | 38             |
| 27    | 2008 | 5     | 11   | 7     | 0            | 23    | 45             | 64             |
| 28    | 2004 | 2     | 7    | 1     | 0            | 10    | 29             | 14             |
| 30A   | 2004 | 42    | 135  | 33    | 0            | 210   | 31             | 24             |
| 30A   | 2005 | 20    | 105  | 57    | 0            | 182   | 19             | 54             |
| 30A   | 2006 | 41    | 67   | 5     | 0            | 113   | 61             | 7              |
| 30A   | 2007 | 14    | 41   | 17    | 1            | 73    | 34             | 41             |
| 30A   | 2008 | 34    | 89   | 12    | 0            | 135   | 38             | 13             |
| 31/32 | 2004 | 8     | 29   | 6     | 0            | 43    | 28             | 21             |
| 31/32 | 2005 | 22    | 43   | 12    | 0            | 77    | 51             | 28             |
| 31/32 | 2006 | 16    | 38   | 11    | 0            | 65    | 42             | 29             |
| 31/32 | 2007 | 19    | 49   | 33    | 0            | 101   | 39             | 67             |
| 31/32 | 2008 | 33    | 47   | 16    | 0            | 96    | 70             | 34             |
| 32    | 2004 | 3     | 20   | 2     | 0            | 25    | 15             | 10             |
| 34B   | 2004 | 4     | 12   | 7     | 0            | 23    | 33             | 58             |
| 34B   | 2005 | 7     | 26   | 15    | 0            | 48    | 27             | 58             |
| 34B   | 2006 | 5     | 14   | 2     | 0            | 21    | 36             | 14             |
| 34B   | 2007 | 13    | 25   | 6     | 3            | 47    | 52             | 24             |
| 34B   | 2008 | 11    | 14   | 2     | 0            | 27    | 79             | 14             |
| 35    | 2004 | 7     | 32   | 5     | 0            | 44    | 22             | 16             |
| 35    | 2005 | 29    | 65   | 28    | 0            | 122   | 45             | 43             |
| 35    | 2006 | 14    | 56   | 10    | 0            | 80    | 25             | 18             |
| 35    | 2007 | 12    | 43   | 18    | 0            | 73    | 28             | 42             |
| 35    | 2008 | 18    | 65   | 3     | 0            | 86    | 28             | 5              |
| 36A   | 2004 | 3     | 4    | 3     | 0            | 10    | 75             | 75             |
| 36A   | 2006 | 2     | 1    | 0     | 0            | 3     | 200            | 0              |
| 36B   | 2004 | 5     | 17   | 6     | 0            | 28    | 29             | 35             |
| 36B   | 2005 | 7     | 12   | 2     | 0            | 21    | 58             | 17             |
| 36B   | 2006 | 8     | 8    | 0     | 0            | 16    | 100            | 0              |
| 36B   | 2007 | 5     | 14   | 0     | 0            | 19    | 36             | 0              |
| 36B   | 2008 | 5     | 4    | 1     | 0            | 10    | 125            | 25             |

# Pronghorn Antelope Harvest Data

## *Historic Summary of General Antelope Hunts (Juniors-Only Hunts listed separately)*

| Year | 1st Choice Applicants | Permits Issued | Hunters | Hunter Days | Harvest |                         |       | Percent Success |
|------|-----------------------|----------------|---------|-------------|---------|-------------------------|-------|-----------------|
|      |                       |                |         |             | Bucks   | Does/Fawns <sup>1</sup> | Total |                 |
| 1941 | —                     | 400            | 387     | —           | 286     | 0                       | 286   | 74              |
| 1942 | —                     | 750            | 721     | —           | 487     | 0                       | 487   | 68              |
| 1943 | —                     | 1072           | 991     | —           | 522     | 0                       | 522   | 53              |
| 1949 | —                     | 606            | 575     | —           | 437     | 0                       | 437   | 76              |
| 1950 | —                     | 520            | 502     | —           | 382     | 0                       | 382   | 76              |
| 1951 | —                     | 835            | 794     | —           | 548     | 0                       | 548   | 69              |
| 1952 | —                     | 1233           | 1201    | —           | 739     | 0                       | 739   | 62              |
| 1953 | —                     | 1340           | 1283    | —           | 828     | 0                       | 828   | 65              |
| 1954 | —                     | 1600           | 1561    | —           | 1146    | 0                       | 1146  | 73              |
| 1955 | —                     | 955            | 914     | —           | 578     | 0                       | 578   | 63              |
| 1956 | —                     | 445            | 430     | —           | 297     | 0                       | 297   | 69              |
| 1957 | —                     | 305            | 296     | —           | 205     | 0                       | 205   | 69              |
| 1958 | —                     | 490            | 476     | —           | 317     | 0                       | 317   | 67              |
| 1959 | —                     | 990            | 974     | —           | 589     | 0                       | 589   | 61              |
| 1960 | —                     | 1200           | 1174    | —           | 722     | 0                       | 722   | 62              |
| 1961 | —                     | 1411           | 1373    | —           | 687     | 68                      | 755   | 55              |
| 1962 | —                     | 1215           | 1173    | —           | 559     | 53                      | 612   | 52              |
| 1963 | —                     | 1281           | 1257    | —           | 690     | 39                      | 729   | 58              |
| 1964 | —                     | 1413           | 1377    | —           | 724     | 125                     | 849   | 62              |
| 1965 | —                     | 1278           | 1248    | —           | 652     | 25                      | 677   | 54              |
| 1966 | 6781                  | 1180           | 1150    | —           | 542     | 20                      | 562   | 49              |
| 1967 | 5895                  | 1336           | 1297    | —           | 667     | 27                      | 694   | 54              |
| 1968 | 4291                  | 800            | 782     | —           | 352     | 2                       | 354   | 45              |
| 1969 | 5178                  | 810            | 791     | —           | 406     | 0                       | 406   | 51              |
| 1970 | 6769                  | 1124           | 1103    | —           | 589     | 28                      | 617   | 56              |
| 1971 | 6493                  | 909            | 896     | —           | 559     | 0                       | 559   | 62              |
| 1972 | 5594                  | 997            | 972     | —           | 480     | 20                      | 500   | 51              |
| 1973 | 6161                  | 1219           | 1205    | —           | 642     | 21                      | 663   | 55              |
| 1974 | 6435                  | 1213           | 1181    | 2445        | 685     | 31                      | 716   | 61              |
| 1975 | 6340                  | 1196           | 1163    | 2293        | 652     | 18                      | 670   | 58              |
| 1976 | 7680                  | 974            | 937     | 1983        | 522     | 0                       | 522   | 56              |
| 1977 | 9138                  | 970            | 796     | 1713        | 425     | 0                       | 425   | 53              |
| 1978 | 9751                  | 880            | 849     | 1955        | 415     | 0                       | 415   | 49              |
| 1979 | 9557                  | 844            | 810     | 1816        | 427     | 0                       | 427   | 53              |
| 1980 | 9493                  | 713            | 683     | 1513        | 444     | 0                       | 444   | 65              |
| 1981 | 9888                  | 730            | 713     | 1502        | 456     | 0                       | 456   | 64              |
| 1982 | 9571                  | 835            | 814     | 1904        | 506     | 0                       | 506   | 62              |
| 1983 | 7978                  | 834            | 795     | 1816        | 521     | 0                       | 521   | 66              |
| 1984 | 7357                  | 841            | 810     | 1701        | 558     | 0                       | 558   | 69              |
| 1985 | 7965                  | 780            | 768     | 1621        | 584     | 0                       | 584   | 76              |
| 1986 | 8354                  | 740            | 728     | 1526        | 533     | 0                       | 533   | 73              |
| 1987 | 8682                  | 591            | 571     | 1177        | 426     | 0                       | 426   | 75              |
| 1988 | 9035                  | 647            | 640     | 1374        | 489     | 0                       | 489   | 76              |
| 1989 | 8988                  | 647            | 633     | 1341        | 488     | 0                       | 488   | 77              |
| 1990 | 8812                  | 601            | 587     | 1366        | 424     | 0                       | 424   | 72              |
| 1991 | 9047                  | 574            | 565     | 1225        | 442     | 0                       | 442   | 78              |
| 1992 | 10095                 | 528            | 507     | 1105        | 417     | 0                       | 417   | 82              |
| 1993 | 11204                 | 645            | 633     | 1496        | 484     | 0                       | 484   | 76              |
| 1994 | 11888                 | 652            | 640     | 1411        | 521     | 0                       | 521   | 81              |
| 1995 | 12933                 | 656            | 650     | 1427        | 534     | 0                       | 534   | 82              |
| 1996 | 14116                 | 651            | 630     | 1308        | 540     | 0                       | 540   | 86              |
| 1997 | 15138                 | 556            | 545     | 1214        | 435     | 0                       | 435   | 80              |
| 1998 | 16728                 | 543            | 534     | 1248        | 427     | 0                       | 427   | 80              |
| 1999 | 17168                 | 497            | 484     | 1088        | 407     | 0                       | 407   | 84              |
| 2000 | 16989                 | 459            | 454     | 943         | 402     | 0                       | 402   | 89              |
| 2001 | 16450                 | 450            | 442     | 898         | 356     | 0                       | 356   | 81              |
| 2002 | 20082                 | 437            | 428     | 929         | 357     | 0                       | 357   | 83              |
| 2003 | 22727                 | 360            | 350     | 807         | 295     | 0                       | 295   | 84              |
| 2004 | 25822                 | 353            | 345     | 825         | 283     | 0                       | 283   | 82              |
| 2005 | 18627                 | 422            | 413     | 976         | 356     | 0                       | 356   | 86              |
| 2006 | 23632                 | 455            | 440     | 1083        | 389     | 0                       | 389   | 88              |
| 2007 | 28042                 | 473            | 466     | 1257        | 414     | 0                       | 414   | 89              |
| 2008 | 18931                 | 503            | 485     | 1226        | 432     | 0                       | 432   | 89              |

<sup>1</sup> Harvest classifications prior to 1968 are unavailable for some hunts. In these cases, all harvest has been listed as bucks.

## Pronghorn Antelope Harvest Data

### *Historic Summary of Juniors-Only Antelope Hunts*

| Year | 1st Choice Applicants    | Permits Issued | Hunters | Hunter Days | Harvest |            |       | Percent Success |
|------|--------------------------|----------------|---------|-------------|---------|------------|-------|-----------------|
|      |                          |                |         |             | Bucks   | Does/Fawns | Total |                 |
| 1999 | 443                      | 15             | 15      | 29          | 13      | 0          | 13    | 87              |
| 2000 | 485                      | 15             | 15      | 41          | 12      | 0          | 12    | 80              |
| 2001 | 509                      | 15             | 15      | 22          | 13      | 0          | 13    | 87              |
| 2002 | 664                      | 15             | 15      | 26          | 14      | 0          | 14    | 93              |
| 2003 | 761                      | 12             | 12      | 39          | 8       | 0          | 8     | 67              |
| 2004 | 776                      | 12             | 12      | 39          | 5       | 0          | 5     | 42              |
| 2005 | No juniors hunts offered |                |         |             |         |            |       |                 |
| 2006 | No juniors hunts offered |                |         |             |         |            |       |                 |
| 2007 | No juniors hunts offered |                |         |             |         |            |       |                 |
| 2008 | No juniors hunts offered |                |         |             |         |            |       |                 |

### *Historic Summary of Muzzleloader Antelope Hunts*

| Year | 1st Choice Applicants | Permits Issued | Hunters | Hunter Days | Harvest |            |       | Percent Success |
|------|-----------------------|----------------|---------|-------------|---------|------------|-------|-----------------|
|      |                       |                |         |             | Bucks   | Does/Fawns | Total |                 |
| 1982 | 89                    | 40             | 40      | 154         | 13      | 0          | 13    | 33              |
| 1983 | 87                    | 45             | 44      | 135         | 13      | 0          | 13    | 30              |
| 1984 | 132                   | 75             | 68      | 181         | 23      | 0          | 23    | 34              |
| 1985 | 181                   | 65             | 60      | 166         | 19      | 0          | 19    | 32              |
| 1986 | 246                   | 78             | 78      | 206         | 32      | 0          | 32    | 41              |
| 1987 | 358                   | 123            | 117     | 361         | 40      | 0          | 40    | 34              |
| 1988 | 365                   | 122            | 119     | 316         | 58      | 0          | 58    | 49              |
| 1989 | 454                   | 147            | 144     | 378         | 64      | 0          | 64    | 44              |
| 1990 | 528                   | 145            | 135     | 370         | 68      | 0          | 68    | 50              |
| 1991 | 608                   | 143            | 138     | 441         | 55      | 0          | 55    | 40              |
| 1992 | 587                   | 143            | 141     | 481         | 61      | 0          | 61    | 43              |
| 1993 | 628                   | 153            | 149     | 486         | 80      | 0          | 80    | 54              |
| 1994 | 729                   | 148            | 146     | 495         | 67      | 0          | 67    | 46              |
| 1995 | 821                   | 142            | 136     | 460         | 53      | 0          | 53    | 39              |
| 1996 | 824                   | 106            | 103     | 302         | 62      | 0          | 62    | 60              |
| 1997 | 831                   | 91             | 91      | 261         | 57      | 0          | 57    | 63              |
| 1998 | 865                   | 96             | 95      | 254         | 56      | 0          | 56    | 59              |
| 1999 | 988                   | 91             | 89      | 245         | 57      | 0          | 57    | 64              |
| 2000 | 1027                  | 99             | 97      | 289         | 59      | 0          | 59    | 61              |
| 2001 | 1017                  | 93             | 92      | 212         | 62      | 0          | 62    | 67              |
| 2002 | 1319                  | 94             | 94      | 199         | 72      | 0          | 72    | 77              |
| 2003 | 1561                  | 87             | 83      | 240         | 55      | 0          | 55    | 66              |
| 2004 | 1746                  | 92             | 89      | 292         | 50      | 0          | 50    | 56              |
| 2005 | 1446                  | 97             | 91      | 297         | 56      | 0          | 56    | 62              |
| 2006 | 1618                  | 103            | 103     | 336         | 68      | 0          | 68    | 66              |
| 2007 | 2154                  | 103            | 94      | 320         | 67      | 0          | 67    | 71              |
| 2008 | 1691                  | 113            | 108     | 413         | 76      | 0          | 76    | 70              |

## Pronghorn Antelope Harvest Data

### *Historic Summary of Archery Antelope Hunts*

| Year | 1st Choice Applicants | Permits Issued | Hunters | Hunter Days | Harvest |            |       | Percent Success |
|------|-----------------------|----------------|---------|-------------|---------|------------|-------|-----------------|
|      |                       |                |         |             | Bucks   | Does/Fawns | Total |                 |
| 1974 | 16                    | 50             | 37      | 168         | 2       | 0          | 2     | 5.4             |
| 1975 | 17                    | 50             | 25      | 62          | 0       | 0          | 0     | .0              |
| 1976 | 36                    | 100            | 57      | 209         | 3       | 0          | 3     | 5.3             |
| 1977 | 84                    | 119            | 93      | 405         | 5       | 1          | 6     | 6.5             |
| 1978 | 106                   | 160            | 142     | 498         | 11      | 2          | 13    | 9.2             |
| 1979 | 116                   | 210            | 170     | 683         | 7       | 6          | 13    | 7.6             |
| 1980 | 203                   | 225            | 214     | 1133        | 21      | 0          | 21    | 9.8             |
| 1981 | 364                   | 225            | 203     | 1203        | 13      | 0          | 13    | 6.4             |
| 1982 | 338                   | 236            | 218     | 1370        | 15      | 0          | 15    | 6.9             |
| 1983 | 249                   | 289            | 268     | 1357        | 20      | 2          | 22    | 8.2             |
| 1984 | 298                   | 339            | 315     | 1543        | 33      | 3          | 36    | 11.4            |
| 1985 | 332                   | 364            | 345     | 1791        | 32      | 1          | 33    | 9.6             |
| 1986 | 385                   | 423            | 401     | 2175        | 31      | 3          | 34    | 8.5             |
| 1987 | 483                   | 473            | 451     | 2315        | 32      | 0          | 32    | 7.1             |
| 1988 | 468                   | 497            | 475     | 2596        | 52      | 1          | 53    | 11.2            |
| 1989 | 564                   | 508            | 475     | 2565        | 54      | 0          | 54    | 11.4            |
| 1990 | 625                   | 484            | 456     | 2490        | 53      | 0          | 53    | 11.6            |
| 1991 | 678                   | 549            | 521     | 2999        | 46      | 0          | 46    | 8.8             |
| 1992 | 831                   | 657            | 631     | 3646        | 75      | 0          | 75    | 11.9            |
| 1993 | 1046                  | 666            | 615     | 3391        | 111     | 0          | 111   | 18.0            |
| 1994 | 1183                  | 683            | 621     | 3474        | 116     | 0          | 116   | 18.7            |
| 1995 | 1233                  | 671            | 617     | 3580        | 106     | 0          | 106   | 17.2            |
| 1996 | 1373                  | 611            | 568     | 3160        | 101     | 0          | 101   | 17.8            |
| 1997 | 1497                  | 585            | 549     | 3065        | 106     | 0          | 106   | 19.3            |
| 1998 | 1582                  | 587            | 560     | 3155        | 110     | 0          | 110   | 19.6            |
| 1999 | 1812                  | 588            | 562     | 3417        | 97      | 0          | 97    | 17.3            |
| 2000 | 1933                  | 558            | 516     | 3102        | 70      | 0          | 70    | 13.6            |
| 2001 | 1943                  | 536            | 503     | 3156        | 82      | 0          | 82    | 16.3            |
| 2002 | 2319                  | 514            | 493     | 2667        | 143     | 0          | 143   | 29.0            |
| 2003 | 2482                  | 433            | 408     | 2557        | 57      | 0          | 57    | 14.0            |
| 2004 | 2502                  | 416            | 388     | 2622        | 73      | 0          | 73    | 18.8            |
| 2005 | 2069                  | 415            | 392     | 2452        | 59      | 0          | 59    | 15.0            |
| 2006 | 2376                  | 400            | 361     | 2383        | 71      | 0          | 71    | 20.0            |
| 2007 | 2697                  | 399            | 370     | 2420        | 89      | 0          | 89    | 24.0            |
| 2008 | 2074                  | 394            | 371     | 2432        | 111     | 0          | 111   | 30.0            |

# Pronghorn Antelope Hunt Data

## 5-Year: 2004-2008 Harvest

| Unit            | Year | Dates       | Permits Authorized | 1st Choice Applicants | Permits Issued | Draw Odds | Hunters | Hunter Days | Harvest | Hunt Success |
|-----------------|------|-------------|--------------------|-----------------------|----------------|-----------|---------|-------------|---------|--------------|
| <b>FIREARMS</b> |      |             |                    |                       |                |           |         |             |         |              |
| 1               | 2004 | 9/24-9/29   | 30                 | 4729                  | 30             | 0.6       | 29      | 53          | 27      | 93           |
| 1               | 2005 | 9/23-9/28   | 30                 | 3097                  | 30             | 0.9       | 30      | 80          | 29      | 97           |
| 1               | 2006 | 9/08-9/17   | 30                 | 3805                  | 30             | 0.7       | 30      | 90          | 25      | 83           |
| 1               | 2007 | 9/07-9/16   | 30                 | 3988                  | 31             | 0.8       | 31      | 82          | 26      | 84           |
| 1               | 2008 | 9/05-9/14   | 30                 | 2691                  | 30             | 1.1       | 30      | 86          | 28      | 93           |
| 2A              | 2004 | 9/24-9/29   | 30                 | 795                   | 30             | 1.3       | 28      | 45          | 25      | 89           |
| 2A              | 2005 | 9/23-9/28   | 30                 | 640                   | 30             | 2.0       | 29      | 68          | 24      | 83           |
| 2A              | 2006 | 9/08-9/17   | 30                 | 779                   | 30             | 2.2       | 30      | 67          | 27      | 90           |
| 2A              | 2007 | 9/07-9/16   | 30                 | 950                   | 30             | 2.3       | 30      | 64          | 28      | 93           |
| 2A              | 2008 | 9/05-9/14   | 35                 | 702                   | 35             | 2.0       | 35      | 75          | 33      | 94           |
| 2C              | 2004 | 9/24-9/29   | 16                 | 603                   | 16             | 1.5       | 16      | 32          | 15      | 94           |
| 2C              | 2005 | 9/23-9/28   | 20                 | 479                   | 20             | 1.9       | 20      | 40          | 20      | 100          |
| 2C              | 2006 | 9/08-9/17   | 15                 | 508                   | 15             | 2.4       | 15      | 47          | 14      | 93           |
| 2C              | 2007 | 9/07-9/16   | 8                  | 390                   | 8              | 0.8       | 7       | 23          | 5       | 71           |
| 2C              | 2008 | 9/05-9/14   | 5                  | 217                   | 5              | 1.4       | 4       | 11          | 3       | 75           |
| 3A              | 2004 | 9/24-9/29   | 10                 | 549                   | 10             | 1.3       | 10      | 25          | 10      | 100          |
| 3A              | 2005 | 9/23-9/28   | 15                 | 558                   | 15             | 1.6       | 15      | 39          | 14      | 93           |
| 3A              | 2006 | 9/08-9/17   | 15                 | 606                   | 15             | 1.8       | 15      | 25          | 12      | 80           |
| 3A              | 2007 | 9/07-9/16   | 20                 | 835                   | 20             | 1.8       | 19      | 45          | 18      | 95           |
| 3A              | 2008 | 9/05-9/14   | 25                 | 644                   | 25             | 2.6       | 25      | 77          | 23      | 92           |
| 3B              | 2004 | 9/24-9/29   | 5                  | 281                   | 5              | 1.4       | 4       | 8           | 4       | 100          |
| 3B              | 2005 | 9/23-9/28   | 5                  | 226                   | 5              | 1.3       | 5       | 6           | 5       | 100          |
| 3B              | 2006 | 9/08-9/17   | 5                  | 273                   | 5              | 1.5       | 5       | 9           | 5       | 100          |
| 3B North        | 2004 | 9/24-9/29   | 10                 | 334                   | 10             | 2.1       | 10      | 23          | 8       | 80           |
| 3B North        | 2005 | 9/23-9/28   | 10                 | 132                   | 10             | 3.8       | 10      | 22          | 8       | 80           |
| 3B North        | 2006 | 9/08-9/17   | 5                  | 94                    | 5              | 3.2       | 5       | 8           | 5       | 100          |
| 3B North        | 2007 | 9/07-9/16   | 5                  | 331                   | 5              | 1.2       | 5       | 16          | 3       | 60           |
| 3C              | 2004 | 9/24-9/29   | 5                  | 132                   | 5              | 2.3       | 5       | 14          | 4       | 80           |
| 3C              | 2005 | 9/23-9/28   | 5                  | 113                   | 5              | 1.8       | 5       | 13          | 5       | 100          |
| 3C              | 2006 | 9/08-9/17   | 5                  | 166                   | 5              | 2.4       | 5       | 13          | 3       | 60           |
| 3C              | 2007 | 9/07-9/16   | 7                  | 228                   | 7              | 3.1       | 7       | 19          | 7       | 100          |
| 3C              | 2008 | 9/05-9/14   | 7                  | 175                   | 7              | 2.3       | 5       | 16          | 5       | 100          |
| 4A              | 2004 | 9/24-9/29   | 15                 | 1170                  | 15             | 1.3       | 15      | 48          | 12      | 80           |
| 4A              | 2005 | 9/23-9/28   | 15                 | 871                   | 15             | 1.5       | 15      | 39          | 10      | 67           |
| 4A              | 2006 | 9/08-9/17   | 15                 | 964                   | 15             | 1.1       | 14      | 28          | 13      | 93           |
| 4A              | 2007 | 9/07-9/16   | 10                 | 889                   | 10             | 0.8       | 10      | 37          | 8       | 80           |
| 4A              | 2008 | 9/05-9/14   | 10                 | 628                   | 10             | 1.4       | 10      | 24          | 9       | 90           |
| 4B              | 2004 | 9/24-9/29   | 10                 | 524                   | 10             | 1.3       | 10      | 18          | 6       | 60           |
| 4B              | 2005 | 9/23-9/28   | 10                 | 384                   | 10             | 2.1       | 9       | 15          | 9       | 100          |
| 4B              | 2006 | 9/08-9/17   | 5                  | 314                   | 5              | 1.3       | 5       | 11          | 5       | 100          |
| 4B              | 2007 | 9/07-9/16   | 10                 | 555                   | 10             | 1.1       | 8       | 46          | 6       | 75           |
| 4B              | 2008 | 9/05-9/14   | 15                 | 406                   | 15             | 3.2       | 14      | 36          | 11      | 79           |
| 5A              | 2004 | 10/01-10/06 | 3                  | 399                   | 3              | 0.8       | 3       | 6           | 3       | 100          |
| 5A              | 2005 | 9/30-10/05  | 6                  | 353                   | 6              | 1.1       | 6       | 21          | 3       | 50           |
| 5A              | 2006 | 9/08-9/17   | 6                  | 357                   | 6              | 1.7       | 6       | 28          | 6       | 100          |
| 5A              | 2007 | 9/07-9/16   | 6                  | 422                   | 6              | 1.2       | 6       | 26          | 6       | 100          |
| 5A              | 2008 | 9/05-9/14   | 10                 | 353                   | 10             | 2.3       | 10      | 22          | 10      | 100          |
| 5B              | 2004 | 10/01-10/06 | 5                  | 550                   | 5              | 0.5       | 5       | 13          | 5       | 100          |
| 5B              | 2005 | 9/30-10/05  | 7                  | 519                   | 7              | 1.3       | 7       | 28          | 6       | 86           |
| 5B              | 2006 | 9/08-9/17   | 7                  | 651                   | 7              | 1.1       | 6       | 18          | 5       | 83           |
| 5B              | 2007 | 9/07-9/16   | 5                  | 609                   | 5              | 0.8       | 5       | 6           | 5       | 100          |
| 5B              | 2008 | 9/05-9/14   | 20                 | 733                   | 20             | 2.6       | 20      | 83          | 15      | 75           |
| 6A              | 2004 | 10/01-10/06 | 3                  | 319                   | 3              | 0.6       | 3       | 8           | 2       | 67           |
| 6A              | 2005 | 9/30-10/05  | 3                  | 178                   | 3              | 1.1       | 3       | 7           | 2       | 67           |
| 6A              | 2006 | 9/08-9/17   | 3                  | 224                   | 3              | 1.3       | 3       | 8           | 3       | 100          |
| 6A              | 2007 | 9/07-9/16   | 3                  | 355                   | 3              | 0.8       | 3       | 6           | 3       | 100          |
| 6A              | 2008 | 9/05-9/14   | 3                  | 172                   | 3              | 1.2       | 3       | 16          | 3       | 100          |
| 7               | 2004 | 10/01-10/06 | 46                 | 3824                  | 46             | 1.0       | 46      | 142         | 29      | 63           |
| 7               | 2005 | 9/30-10/05  | 55                 | 2689                  | 55             | 1.6       | 54      | 114         | 48      | 89           |
| 7               | 2006 | 9/08-9/17   | 55                 | 3225                  | 55             | 1.6       | 55      | 148         | 49      | 89           |
| 7               | 2007 | 9/07-9/16   | 65                 | 4339                  | 65             | 1.2       | 65      | 198         | 51      | 78           |
| 7               | 2008 | 9/05-9/14   | 50                 | 2085                  | 50             | 1.9       | 48      | 103         | 44      | 92           |

CN = Camp Navajo E = Early Season L = Late Season



# Pronghorn Antelope Hunt Data

## 5-Year: 2004-2008 Harvest

| Unit                        | Year | Dates       | Permits Authorized | 1st Choice Applicants | Permits Issued | Draw Odds | Hunters | Hunter Days | Harvest | Hunt Success |
|-----------------------------|------|-------------|--------------------|-----------------------|----------------|-----------|---------|-------------|---------|--------------|
| <b>FIREARMS (continued)</b> |      |             |                    |                       |                |           |         |             |         |              |
| 9                           | 2004 | 10/01-10/06 | 15                 | 860                   | 15             | 1.2       | 15      | 57          | 14      | 93           |
| 9                           | 2005 | 9/30-10/05  | 15                 | 579                   | 15             | 1.7       | 15      | 28          | 14      | 93           |
| 9                           | 2006 | 9/08-9/17   | 20                 | 828                   | 20             | 2.1       | 20      | 53          | 19      | 95           |
| 9                           | 2007 | 9/07-9/16   | 20                 | 1011                  | 20             | 1.4       | 20      | 48          | 19      | 95           |
| 9                           | 2008 | 9/05-9/14   | 25                 | 753                   | 25             | 2.4       | 25      | 69          | 24      | 96           |
| 10                          | 2004 | 10/01-10/06 | 20                 | 4203                  | 20             | 0.5       | 18      | 57          | 15      | 83           |
| 10                          | 2005 | 9/30-10/05  | 40                 | 3177                  | 40             | 1.2       | 40      | 111         | 29      | 73           |
| 10                          | 2006 | 9/08-9/17   | 50                 | 4450                  | 50             | 1.0       | 48      | 132         | 41      | 85           |
| 10                          | 2007 | 9/07-9/16   | 50                 | 5795                  | 50             | 0.9       | 49      | 144         | 45      | 92           |
| 10                          | 2008 | 9/05-9/14   | 60                 | 4571                  | 60             | 1.3       | 60      | 146         | 53      | 88           |
| 12                          | 2006 | 9/08-9/17   | 2                  | 91                    | 2              | 2.2       | 2       | 4           | 2       | 100          |
| 12                          | 2007 | 9/07-9/16   | 2                  | 132                   | 2              | 1.5       | 2       | 14          | 2       | 100          |
| 12                          | 2008 | 9/05-9/14   | 2                  | 64                    | 2              | 3.1       | 2       | 20          | 2       | 100          |
| 13A                         | 2004 | 10/01-10/06 | 15                 | 318                   | 15             | 3.8       | 14      | 36          | 10      | 71           |
| 13A                         | 2005 | 9/30-10/05  | 20                 | 307                   | 20             | 4.9       | 20      | 44          | 19      | 95           |
| 13A                         | 2006 | 9/08-9/17   | 35                 | 485                   | 35             | 3.5       | 34      | 86          | 30      | 88           |
| 13A                         | 2007 | 9/07-9/16   | 40                 | 805                   | 40             | 3.2       | 40      | 94          | 40      | 100          |
| 13A                         | 2008 | 9/05-9/14   | 40                 | 491                   | 40             | 5.9       | 36      | 80          | 31      | 86           |
| 13B                         | 2004 | 10/01-10/06 | 8                  | 172                   | 8              | 2.3       | 8       | 15          | 5       | 63           |
| 13B                         | 2005 | 9/30-10/05  | 10                 | 98                    | 10             | 9.2       | 7       | 17          | 7       | 100          |
| 13B                         | 2006 | 9/08-9/17   | 20                 | 364                   | 20             | 4.1       | 17      | 34          | 14      | 82           |
| 13B                         | 2007 | 9/07-9/16   | 25                 | 185                   | 25             | 4.3       | 24      | 94          | 17      | 71           |
| 13B                         | 2008 | 9/05-9/14   | 20                 | 183                   | 20             | 7.1       | 20      | 55          | 18      | 90           |
| 17A                         | 2004 | 9/24-9/27   | 3                  | 255                   | 3              | 1.2       | 3       | 5           | 3       | 100          |
| 17A                         | 2005 | 9/23-9/28   | 3                  | 175                   | 3              | 1.7       | 3       | 4           | 3       | 100          |
| 17A                         | 2006 | 9/08-9/17   | 4                  | 217                   | 4              | 1.8       | 4       | 5           | 4       | 100          |
| 17A                         | 2007 | 9/07-9/16   | 4                  | 292                   | 4              | 1.4       | 4       | 4           | 4       | 100          |
| 17A                         | 2008 | 9/05-9/14   | 4                  | 163                   | 4              | 2.5       | 4       | 4           | 4       | 100          |
| 18A                         | 2004 | 10/01-10/06 | 10                 | 536                   | 10             | 1.3       | 10      | 26          | 10      | 100          |
| 18A                         | 2005 | 9/30-10/05  | 15                 | 419                   | 16             | 2.4       | 15      | 32          | 13      | 87           |
| 18A                         | 2006 | 9/15-9/20   | 15                 | 579                   | 15             | 1.7       | 15      | 29          | 14      | 93           |
| 18A                         | 2007 | 9/14-9/19   | 15                 | 662                   | 14             | 1.7       | 14      | 33          | 12      | 86           |
| 18A                         | 2008 | 9/12-9/18   | 15                 | 453                   | 15             | 1.5       | 15      | 35          | 8       | 53           |
| 18B                         | 2004 | 9/24-9/29   | 25                 | 525                   | 25             | 1.9       | 24      | 64          | 14      | 58           |
| 18B                         | 2005 | 9/23-9/28   | 25                 | 316                   | 25             | 2.5       | 24      | 60          | 18      | 75           |
| 18B                         | 2006 | 9/08-9/17   | 30                 | 500                   | 30             | 5.0       | 27      | 55          | 21      | 78           |
| 18B                         | 2007 | 9/07-9/16   | 30                 | 796                   | 31             | 2.1       | 30      | 79          | 28      | 93           |
| 18B                         | 2008 | 9/05-9/14   | 30                 | 442                   | 30             | 4.5       | 29      | 86          | 27      | 93           |
| 19A                         | 2004 | 10/01-10/06 | 15                 | 803                   | 15             | 1.5       | 15      | 19          | 14      | 93           |
| 19A                         | 2004 | 9/24-9/29   | 15                 | 827                   | 15             | 1.3       | 15      | 39          | 13      | 87           |
| 19A                         | 2005 | 9/30-10/05  | 15                 | 667                   | 15             | 1.5       | 14      | 25          | 14      | 100          |
| 19A                         | 2005 | 9/23-9/28   | 20                 | 643                   | 20             | 2.3       | 20      | 53          | 16      | 80           |
| 19A                         | 2006 | 9/15-9/20   | 15                 | 926                   | 15             | 1.6       | 15      | 33          | 12      | 80           |
| 19A                         | 2006 | 9/08-9/17   | 10                 | 520                   | 10             | 1.7       | 9       | 12          | 9       | 100          |
| 19A North                   | 2007 | 9/14-9/19   | 15                 | 927                   | 15             | 1.3       | 15      | 23          | 15      | 100          |
| 19A South                   | 2007 | 9/14-9/19   | 10                 | 463                   | 10             | 1.1       | 10      | 16          | 10      | 100          |
| 19A North                   | 2008 | 9/12-9/18   | 15                 | 534                   | 15             | 2.4       | 13      | 15          | 13      | 100          |
| 19A South                   | 2008 | 9/05-9/14   | 10                 | 292                   | 10             | 2.4       | 10      | 25          | 10      | 100          |
| 19B                         | 2004 | 9/24-9/27   | 26                 | 1750                  | 26             | 1.3       | 26      | 48          | 22      | 85           |
| 19B                         | 2005 | 9/23-9/26   | 30                 | 1188                  | 30             | 1.8       | 30      | 78          | 24      | 80           |
| 19B                         | 2006 | 9/08-9/17   | 40                 | 1655                  | 40             | 2.0       | 39      | 97          | 37      | 95           |
| 19B                         | 2007 | 9/07-9/16   | 40                 | 2006                  | 40             | 1.5       | 40      | 84          | 38      | 95           |
| 19B                         | 2008 | 9/05-9/14   | 50                 | 1385                  | 50             | 2.9       | 48      | 105         | 43      | 90           |
| 21                          | 2004 | 10/01-10/06 | 2                  | 234                   | 2              | 0.9       | 2       | 6           | 2       | 100          |
| 21                          | 2005 | 9/30-10/05  | 4                  | 173                   | 4              | 2.3       | 4       | 12          | 3       | 75           |
| 21                          | 2006 | 9/08-9/17   | 5                  | 253                   | 5              | 2.0       | 5       | 17          | 4       | 80           |
| 21                          | 2007 | 9/07-9/16   | 7                  | 280                   | 7              | 2.5       | 7       | 20          | 6       | 86           |
| 21                          | 2008 | 9/05-9/14   | 10                 | 329                   | 10             | 2.4       | 8       | 21          | 5       | 63           |
| 30A                         | 2004 | 9/24-9/27   | 6                  | 237                   | 6              | 2.5       | 6       | 10          | 6       | 100          |
| 30A                         | 2005 | 9/23-9/26   | 8                  | 177                   | 8              | 4.0       | 8       | 13          | 8       | 100          |
| 30A                         | 2006 | 9/08-9/17   | 8                  | 214                   | 8              | 2.8       | 6       | 11          | 6       | 100          |
| 30A                         | 2007 | 9/07-9/16   | 10                 | 290                   | 10             | 2.1       | 10      | 18          | 8       | 80           |

CN = Camp Navajo E = Early Season L = Late Season

# Pronghorn Antelope Hunt Data

## 5-Year: 2004-2008 Harvest

| Unit                        | Year | Dates       | Permits Authorized | 1st Choice Applicants | Permits Issued | Draw Odds | Hunters | Hunter Days | Harvest | Hunt Success |
|-----------------------------|------|-------------|--------------------|-----------------------|----------------|-----------|---------|-------------|---------|--------------|
| <b>FIREARMS (continued)</b> |      |             |                    |                       |                |           |         |             |         |              |
| 30A                         | 2008 | 9/05-9/14   | 8                  | 166                   | 8              | 3.0       | 8       | 8           | 7       | 88           |
| 31/32                       | 2004 | 10/01-10/06 | 4                  | 481                   | 4              | 0.8       | 4       | 7           | 4       | 100          |
| 31/32                       | 2005 | 9/30-10/05  | 4                  | 268                   | 4              | 1.5       | 4       | 6           | 4       | 100          |
| 31/32                       | 2006 | 9/08-9/17   | 4                  | 330                   | 4              | 1.2       | 4       | 14          | 3       | 75           |
| 31/32                       | 2007 | 9/07-9/16   | 3                  | 271                   | 4              | 0.4       | 4       | 17          | 3       | 75           |
| 31/32                       | 2008 | 9/05-9/14   | 3                  | 183                   | 3              | 1.1       | 2       | 7           | 2       | 100          |
| 34B                         | 2004 | 10/01-10/06 | 1                  | 412                   | 1              | 0.2       | 1       | 1           | 1       | 100          |
| 34B                         | 2005 | 9/30-10/05  | 1                  | 201                   | 1              | 0.5       | 1       | 1           | 1       | 100          |
| 34B                         | 2006 | 9/15-9/20   | 1                  | 254                   | 1              | 0.4       | 1       | 1           | 1       | 100          |
| 34B                         | 2007 | 9/14-9/19   | 1                  | 236                   | 1              | 0.4       | 1       | 1           | 1       | 100          |
| 34B                         | 2008 | 9/12-9/18   | 1                  | 116                   | 1              | 0.9       | 1       | 1           | 1       | 100          |
| <b>JUNIORS ONLY</b>         |      |             |                    |                       |                |           |         |             |         |              |
| 2C                          | 2004 | 9/24-9/29   | 4                  | 270                   | 4              | 0.7       | 4       | 19          | 1       | 25           |
| 7                           | 2004 | 10/01-10/06 | 4                  | 294                   | 4              | 1.4       | 4       | 4           | 4       | 100          |
| 19B                         | 2004 | 10/01-10/06 | 4                  | 202                   | 4              | 1.5       | 4       | 16          | 0       | 0            |
| <b>MUZZLELOADER</b>         |      |             |                    |                       |                |           |         |             |         |              |
| 2B                          | 2004 | 9/24-9/29   | 35                 | 522                   | 35             | 3.1       | 33      | 145         | 14      | 42           |
| 2B                          | 2005 | 9/23-9/28   | 35                 | 409                   | 35             | 6.1       | 30      | 104         | 18      | 60           |
| 2B                          | 2006 | 9/08-9/17   | 35                 | 446                   | 35             | 5.2       | 35      | 132         | 21      | 60           |
| 2B                          | 2007 | 9/07-9/16   | 30                 | 534                   | 30             | 3.6       | 29      | 108         | 16      | 55           |
| 2B                          | 2008 | 9/05-9/14   | 30                 | 342                   | 30             | 4.7       | 28      | 128         | 14      | 50           |
| 3B North                    | 2008 | 9/05-9/14   | 8                  | 74                    | 8              | 8.1       | 8       | 45          | 5       | 63           |
| 3B South                    | 2008 | 9/05-9/14   | 2                  | 23                    | 2              | 4.3       | 2       | 5           | 1       | 50           |
| 8                           | 2004 | 10/01-10/06 | 25                 | 551                   | 25             | 3.4       | 24      | 64          | 14      | 58           |
| 8                           | 2005 | 9/30-10/05  | 30                 | 494                   | 30             | 4.0       | 29      | 100         | 14      | 48           |
| 8                           | 2006 | 9/08-9/17   | 35                 | 516                   | 35             | 4.1       | 35      | 126         | 19      | 54           |
| 8                           | 2007 | 9/07-9/16   | 35                 | 681                   | 35             | 2.8       | 33      | 122         | 23      | 70           |
| 8                           | 2008 | 9/05-9/14   | 35                 | 526                   | 35             | 4.4       | 33      | 148         | 23      | 70           |
| 15A/15B                     | 2004 | 9/24-9/27   | 2                  | 35                    | 2              | 5.7       | 2       | 5           | 1       | 50           |
| 15A/15B                     | 2005 | 9/23-9/26   | 2                  | 48                    | 2              | 4.2       | 2       | 8           | 0       | 0            |
| 15A/15B                     | 2006 | 9/08-9/17   | 2                  | 35                    | 2              | 5.7       | 2       | 1           | 1       | 50           |
| 15A/15B                     | 2007 | 9/07-9/16   | 2                  | 44                    | 2              | 0.0       | 2       | 4           | 2       | 100          |
| 15A/15B                     | 2008 | 9/05-9/14   | 2                  | 23                    | 2              | 4.3       | 2       | 10          | 0       | 0            |
| 17B                         | 2004 | 9/24-9/29   | 3                  | 55                    | 3              | 5.5       | 3       | 11          | 2       | 67           |
| 17B                         | 2005 | 9/23-9/28   | 3                  | 40                    | 3              | 5.0       | 3       | 9           | 2       | 67           |
| 17B                         | 2006 | 9/08-9/17   | 3                  | 60                    | 3              | 5.0       | 3       | 4           | 3       | 100          |
| 17B                         | 2007 | 9/07-9/16   | 3                  | 104                   | 3              | 1.9       | 3       | 18          | 3       | 100          |
| 17B                         | 2008 | 9/05-9/14   | 3                  | 82                    | 3              | 3.7       | 3       | 3           | 3       | 100          |
| 18A                         | 2004 | 9/24-9/29   | 10                 | 143                   | 10             | 4.9       | 10      | 21          | 7       | 70           |
| 18A                         | 2005 | 9/23-9/28   | 10                 | 202                   | 10             | 3.5       | 10      | 35          | 8       | 80           |
| 18A                         | 2006 | 9/08-9/13   | 10                 | 185                   | 10             | 4.3       | 10      | 46          | 8       | 80           |
| 18A                         | 2007 | 9/07-9/12   | 10                 | 307                   | 10             | 1.6       | 10      | 33          | 9       | 90           |
| 18A                         | 2008 | 9/05-9/11   | 10                 | 218                   | 10             | 4.1       | 9       | 25          | 8       | 89           |
| 19A                         | 2004 | 9/24-9/29   | 15                 | 321                   | 15             | 2.8       | 15      | 38          | 10      | 67           |
| 19A                         | 2005 | 9/23-9/28   | 15                 | 178                   | 15             | 6.2       | 15      | 35          | 13      | 87           |
| 19A                         | 2006 | 9/08-9/13   | 15                 | 289                   | 15             | 3.8       | 15      | 20          | 14      | 93           |
| 19A North                   | 2007 | 9/07-9/12   | 15                 | 289                   | 15             | 3.8       | 10      | 12          | 10      | 100          |
| 19A North                   | 2008 | 9/05-9/11   | 20                 | 320                   | 20             | 3.4       | 20      | 45          | 19      | 95           |
| 19A South                   | 2007 | 9/07-9/12   | 5                  | 79                    | 5              | 2.5       | 5       | 17          | 2       | 40           |
| 34B                         | 2004 | 9/24-9/29   | 1                  | 41                    | 1              | 0.0       | 1       | 3           | 1       | 100          |
| 34B                         | 2005 | 9/23-9/28   | 1                  | 25                    | 1              | 4.0       | 1       | 4           | 0       | 0            |
| 34B                         | 2006 | 9/08-9/13   | 1                  | 28                    | 1              | 0.0       | 1       | 1           | 1       | 100          |
| 34B                         | 2007 | 9/07-9/12   | 1                  | 37                    | 1              | 2.7       | 0       | 0           | 0       | -            |
| 34B                         | 2008 | 9/05-9/11   | 1                  | 18                    | 1              | 0.0       | 1       | 1           | 1       | 100          |
| 35                          | 2004 | 9/24-9/29   | 1                  | 78                    | 1              | 1.3       | 1       | 5           | 1       | 100          |
| 35                          | 2005 | 9/23-9/28   | 1                  | 50                    | 1              | 2.0       | 1       | 2           | 1       | 100          |
| 35                          | 2006 | 9/08-9/17   | 2                  | 59                    | 2              | 3.4       | 2       | 6           | 1       | 50           |
| 35                          | 2007 | 9/07-9/16   | 2                  | 79                    | 2              | 2.5       | 2       | 6           | 2       | 100          |
| 35                          | 2008 | 9/05-9/14   | 2                  | 65                    | 2              | 1.5       | 2       | 3           | 2       | 100          |
| <b>ARCHERY</b>              |      |             |                    |                       |                |           |         |             |         |              |
| 1                           | 2004 | 8/27-9/09   | 30                 | 315                   | 30             | 7.3       | 28      | 219         | 2       | 7            |
| 1                           | 2005 | 8/26-9/08   | 30                 | 245                   | 30             | 10.2      | 29      | 152         | 3       | 10           |

CN = Camp Navajo E = Early Season L = Late Season

# Pronghorn Antelope Hunt Data

## 5-Year: 2004-2008 Harvest

| Unit                       | Year | Dates     | Permits Authorized | 1st Choice Applicants | Permits Issued | Draw Odds | Hunters | Hunter Days | Harvest | Hunt Success |
|----------------------------|------|-----------|--------------------|-----------------------|----------------|-----------|---------|-------------|---------|--------------|
| <b>ARCHERY (continued)</b> |      |           |                    |                       |                |           |         |             |         |              |
| 1                          | 2006 | 8/25-9/07 | 30                 | 283                   | 30             | 7.8       | 27      | 176         | 6       | 22           |
| 1                          | 2007 | 8/24-9/06 | 30                 | 289                   | 30             | 7.3       | 26      | 212         | 2       | 8            |
| 1                          | 2008 | 8/22-9/04 | 30                 | 208                   | 30             | 10.6      | 30      | 227         | 2       | 7            |
| 3A/3C                      | 2004 | 8/27-9/09 | 20                 | 125                   | 20             | 11.2      | 20      | 133         | 3       | 15           |
| 3A/3C                      | 2005 | 8/26-9/08 | 20                 | 91                    | 20             | 12.1      | 19      | 141         | 4       | 21           |
| 3A/3C                      | 2006 | 8/25-9/07 | 25                 | 128                   | 25             | 13.3      | 21      | 144         | 1       | 5            |
| 3A/3C                      | 2007 | 8/24-9/06 | 25                 | 133                   | 25             | 6.8       | 21      | 129         | 3       | 14           |
| 3A/3C                      | 2008 | 8/22-9/04 | 25                 | 108                   | 25             | 12.0      | 25      | 190         | 4       | 16           |
| 3B                         | 2004 | 8/27-9/09 | 10                 | 38                    | 10             | 18.4      | 5       | 28          | 0       | 0            |
| 3B                         | 2005 | 8/26-9/08 | 10                 | 42                    | 10             | 11.9      | 10      | 62          | 0       | 0            |
| 3B                         | 2006 | 8/25-9/07 | 10                 | 49                    | 10             | 12.2      | 10      | 60          | 1       | 10           |
| 3B                         | 2007 | 8/24-9/06 | 10                 | 36                    | 10             | 16.7      | 10      | 59          | 0       | 0            |
| 3B North                   | 2004 | 8/27-9/09 | 20                 | 39                    | 20             | 20.5      | 20      | 156         | 4       | 20           |
| 3B North                   | 2005 | 8/26-9/08 | 20                 | 43                    | 20             | 7.0       | 19      | 101         | 1       | 5            |
| 3B North                   | 2006 | 8/25-9/07 | 20                 | 34                    | 20             | 38.2      | 18      | 114         | 2       | 11           |
| 3B North                   | 2007 | 8/24-9/06 | 20                 | 83                    | 20             | 6.0       | 19      | 136         | 5       | 26           |
| 3B North                   | 2008 | 8/22-9/04 | 20                 | 37                    | 20             | 29.7      | 20      | 115         | 5       | 25           |
| 3B South                   | 2008 | 8/22-9/04 | 5                  | 18                    | 5              | 11.1      | 5       | 45          | 0       | 0            |
| 4B                         | 2004 | 8/27-9/09 | 15                 | 102                   | 15             | 9.8       | 15      | 92          | 0       | 0            |
| 4B                         | 2005 | 8/26-9/08 | 15                 | 65                    | 15             | 16.9      | 15      | 107         | 3       | 20           |
| 4B                         | 2006 | 8/25-9/07 | 20                 | 117                   | 19             | 9.4       | 16      | 114         | 1       | 6            |
| 4B                         | 2007 | 8/24-9/06 | 20                 | 91                    | 20             | 13.2      | 20      | 125         | 5       | 25           |
| 4B                         | 2008 | 8/22-9/04 | 20                 | 96                    | 20             | 13.5      | 17      | 144         | 0       | 0            |
| 5A                         | 2004 | 8/27-9/09 | 4                  | 37                    | 4              | 10.8      | 4       | 48          | 0       | 0            |
| 5A                         | 2005 | 8/26-9/08 | 5                  | 35                    | 5              | 11.4      | 4       | 43          | 1       | 25           |
| 5A                         | 2006 | 8/25-9/07 | 5                  | 26                    | 5              | 7.7       | 5       | 36          | 0       | 0            |
| 5A                         | 2007 | 8/24-9/06 | 5                  | 42                    | 5              | 11.9      | 5       | 22          | 1       | 20           |
| 5A                         | 2008 | 8/22-9/04 | 5                  | 42                    | 5              | 9.5       | 5       | 10          | 3       | 60           |
| 5B                         | 2004 | 8/27-9/09 | 10                 | 117                   | 10             | 6.0       | 10      | 71          | 2       | 20           |
| 5B                         | 2005 | 8/26-9/08 | 10                 | 92                    | 10             | 9.8       | 8       | 36          | 1       | 13           |
| 5B                         | 2006 | 8/25-9/07 | 10                 | 114                   | 10             | 7.0       | 10      | 73          | 0       | 0            |
| 5B                         | 2007 | 8/24-9/06 | 10                 | 100                   | 10             | 6.0       | 10      | 83          | 2       | 20           |
| 5B                         | 2008 | 8/22-9/04 | 10                 | 105                   | 10             | 7.6       | 10      | 96          | 0       | 0            |
| 6B                         | 2004 | 8/27-9/09 | 25                 | 88                    | 25             | 11.4      | 25      | 208         | 2       | 8            |
| 6B                         | 2005 | 8/26-9/08 | 25                 | 58                    | 25             | 10.3      | 25      | 162         | 4       | 16           |
| 6B                         | 2006 | 8/25-9/07 | 25                 | 87                    | 25             | 14.9      | 23      | 133         | 0       | 0            |
| 6B                         | 2007 | 8/24-9/06 | 25                 | 69                    | 25             | 14.5      | 21      | 167         | 3       | 14           |
| 6B                         | 2008 | 8/22-9/04 | 25                 | 55                    | 25             | 21.8      | 25      | 200         | 5       | 20           |
| 10/18                      | 2004 | 8/27-9/09 | 100                | 560                   | 100            | 11.1      | 97      | 630         | 20      | 21           |
| 10/18                      | 2005 | 8/26-9/08 | 100                | 461                   | 100            | 15.0      | 94      | 619         | 13      | 14           |
| 10/18                      | 2006 | 8/25-9/07 | 100                | 610                   | 100            | 10.7      | 88      | 539         | 25      | 28           |
| 10/18                      | 2007 | 8/24-9/06 | 100                | 852                   | 100            | 8.5       | 94      | 575         | 28      | 30           |
| 10/18                      | 2008 | 8/22-9/04 | 100                | 598                   | 100            | 10.4      | 83      | 535         | 17      | 20           |
| 11M                        | 2004 | 9/03-9/16 | 5                  | 72                    | 5              | 4.2       | 5       | 41          | 1       | 20           |
| 11M                        | 2005 | 9/02-9/15 | 5                  | 71                    | 5              | 7.0       | 5       | 55          | 0       | 0            |
| 11M                        | 2006 | 8/25-9/07 | 5                  | 56                    | 5              | 7.1       | 5       | 51          | 0       | 0            |
| 11M                        | 2007 | 8/24-9/06 | 5                  | 50                    | 5              | 6.0       | 3       | 37          | 0       | 0            |
| 11M                        | 2008 | 8/22-9/04 | 5                  | 31                    | 5              | 12.9      | 5       | 34          | 1       | 20           |
| 12                         | 2004 | 8/27-9/09 | 5                  | 18                    | 5              | 5.6       | 0       | 0           | 0       | —            |
| 12                         | 2005 | 8/26-9/08 | 5                  | 19                    | 5              | 21.1      | 4       | 21          | 0       | 0            |
| 12                         | 2006 | 8/25-9/07 | 5                  | 18                    | 5              | 11.1      | 5       | 63          | 3       | 60           |
| 12                         | 2007 | 8/24-9/06 | 5                  | 20                    | 5              | 20.0      | 5       | 45          | 1       | 20           |
| 12                         | 2008 | 8/22-9/04 | 5                  | 21                    | 5              | 4.8       | 4       | 31          | 3       | 75           |
| 15A/15B                    | 2004 | 8/27-9/09 | 2                  | 34                    | 2              | 5.9       | 2       | 14          | 0       | 0            |
| 15A/15B                    | 2005 | 8/26-9/08 | 2                  | 13                    | 2              | 15.4      | 2       | 24          | 0       | 0            |
| 15A/15B                    | 2006 | 8/25-9/07 | 4                  | 15                    | 4              | 26.7      | 4       | 23          | 2       | 50           |
| 15A/15B                    | 2007 | 8/24-9/06 | 4                  | 35                    | 4              | 5.7       | 4       | 32          | 1       | 25           |
| 15A/15B                    | 2008 | 8/22-9/04 | 4                  | 10                    | 4              | 20.0      | 4       | 13          | 4       | 100          |
| 17B                        | 2004 | 8/27-9/09 | 5                  | 44                    | 5              | 6.8       | 3       | 13          | 3       | 100          |
| 17B                        | 2005 | 8/26-9/08 | 5                  | 52                    | 5              | 7.7       | 5       | 33          | 0       | 0            |
| 17B                        | 2006 | 8/25-9/07 | 5                  | 52                    | 5              | 9.6       | 5       | 25          | 4       | 80           |
| 17B                        | 2007 | 8/24-9/06 | 5                  | 84                    | 5              | 4.8       | 5       | 22          | 2       | 40           |

CN = Camp Navajo E = Early Season L = Late Season

# Pronghorn Antelope Hunt Data

## 5-Year: 2004-2008 Harvest

| Unit                       | Year | Dates     | Permits Authorized | 1st Choice Applicants | Permits Issued | Draw Odds | Hunters | Hunter Days | Harvest | Hunt Success |
|----------------------------|------|-----------|--------------------|-----------------------|----------------|-----------|---------|-------------|---------|--------------|
| <b>ARCHERY (continued)</b> |      |           |                    |                       |                |           |         |             |         |              |
| 17B                        | 2008 | 8/22-9/04 | 5                  | 61                    | 5              | 4.9       | 5       | 30          | 2       | 40           |
| 19A                        | 2004 | 8/20-9/02 | 60                 | 480                   | 60             | 9.6       | 58      | 348         | 12      | 21           |
| 19A                        | 2004 | 9/03-9/16 | 60                 | 69                    | 60             | 21.7      | 51      | 346         | 12      | 24           |
| 19A                        | 2005 | 8/19-9/01 | 60                 | 328                   | 60             | 14.9      | 56      | 327         | 7       | 13           |
| 19A                        | 2005 | 9/02-9/15 | 60                 | 103                   | 60             | 23.3      | 57      | 345         | 10      | 18           |
| 19A                        | 2006 | 8/11-8/24 | 40                 | 281                   | 40             | 8.5       | 36      | 234         | 4       | 11           |
| 19A                        | 2006 | 8/25-9/07 | 40                 | 106                   | 40             | 14.2      | 40      | 224         | 11      | 28           |
| 19A                        | 2007 | 8/10-8/23 | 40                 | 286                   | 40             | 9.1       | 32      | 225         | 7       | 22           |
| 19A                        | 2007 | 8/24-9/06 | 40                 | 134                   | 40             | 14.9      | 40      | 236         | 7       | 18           |
| 19A E                      | 2008 | 8/08-8/21 | 40                 | 235                   | 40             | 14.0      | 40      | 215         | 22      | 55           |
| 19A L                      | 2008 | 8/22-9/04 | 40                 | 94                    | 40             | 20.2      | 40      | 220         | 20      | 50           |
| 19B North                  | 2004 | 8/27-9/09 | 10                 | 132                   | 10             | 4.5       | 10      | 58          | 7       | 70           |
| 19B North                  | 2005 | 8/26-9/08 | 10                 | 143                   | 10             | 4.2       | 9       | 46          | 6       | 67           |
| 19B North                  | 2006 | 8/25-9/07 | 20                 | 180                   | 20             | 9.4       | 19      | 95          | 8       | 42           |
| 19B North                  | 2007 | 8/24-9/06 | 20                 | 207                   | 20             | 8.7       | 20      | 86          | 14      | 70           |
| 19B North                  | 2008 | 8/22-9/04 | 20                 | 155                   | 20             | 11.0      | 20      | 145         | 11      | 55           |
| 21                         | 2004 | 8/27-9/09 | 10                 | 31                    | 10             | 19.4      | 10      | 56          | 0       | 0            |
| 21                         | 2005 | 8/26-9/08 | 10                 | 36                    | 10             | 19.4      | 10      | 63          | 0       | 0            |
| 21                         | 2006 | 8/25-9/07 | 10                 | 37                    | 10             | 8.1       | 8       | 38          | 0       | 0            |
| 21                         | 2007 | 8/24-9/06 | 10                 | 28                    | 10             | 17.9      | 10      | 62          | 0       | 0            |
| 21                         | 2008 | 8/22-9/04 | 10                 | 47                    | 10             | 21.3      | 8       | 58          | 2       | 25           |
| 31/32                      | 2004 | 8/27-9/09 | 10                 | 65                    | 10             | 7.7       | 10      | 73          | 0       | 0            |
| 31/32                      | 2005 | 8/26-9/08 | 10                 | 54                    | 10             | 9.3       | 8       | 57          | 3       | 38           |
| 31/32                      | 2006 | 8/25-9/07 | 10                 | 67                    | 10             | 7.5       | 7       | 48          | 2       | 29           |
| 31/32                      | 2007 | 8/24-9/06 | 10                 | 44                    | 10             | 15.9      | 10      | 88          | 3       | 30           |
| 31/32                      | 2008 | 8/22-9/04 | 10                 | 50                    | 10             | 12.0      | 10      | 57          | 2       | 20           |
| 34B                        | 2004 | 8/27-9/09 | 1                  | 46                    | 1              | 2.2       | 1       | 5           | 0       | 0            |
| 34B                        | 2005 | 8/26-9/08 | 1                  | 35                    | 1              | 2.9       | 1       | 1           | 1       | 100          |
| 34B                        | 2006 | 8/25-9/07 | 1                  | 39                    | 1              | 0.0       | 1       | 6           | 0       | 0            |
| 34B                        | 2007 | 8/24-9/06 | 1                  | 37                    | 1              | 2.7       | 1       | 12          | 0       | 0            |
| 34B                        | 2008 | 8/22-9/04 | 1                  | 35                    | 1              | 2.9       | 1       | 1           | 1       | 100          |
| 35                         | 2004 | 8/27-9/09 | 8                  | 85                    | 8              | 5.9       | 8       | 53          | 5       | 63           |
| 35                         | 2005 | 8/26-9/08 | 6                  | 72                    | 6              | 6.9       | 6       | 32          | 2       | 33           |
| 35                         | 2006 | 8/25-9/07 | 10                 | 71                    | 10             | 7.0       | 9       | 55          | 1       | 11           |
| 35                         | 2007 | 8/24-9/06 | 10                 | 71                    | 10             | 7.0       | 10      | 37          | 3       | 30           |
| 35                         | 2008 | 8/22-9/04 | 10                 | 64                    | 10             | 9.4       | 10      | 60          | 7       | 70           |
| CN                         | 2004 | 8/27-9/10 | 4                  | 3                     | 4              | 100.0     | 4       | 20          | 0       | 0            |
| CN                         | 2004 | 8/27-9/10 | 2                  | 2                     | 2              | 50.0      | 2       | 10          | 0       | 0            |
| CN                         | 2005 | 8/19-8/28 | 4                  | 5                     | 4              | 80.0      | 4       | 16          | 0       | 0            |
| CN                         | 2005 | 8/19-8/28 | 2                  | 6                     | 2              | 16.7      | 2       | 9           | 0       | 0            |
| CN                         | 2006 | 8/25-9/07 | 4                  | 4                     | 4              | 100.0     | 2       | 20          | 0       | 0            |
| CN                         | 2006 | 8/25-9/07 | 2                  | 2                     | 2              | 100.0     | 2       | 12          | 0       | 0            |
| CN                         | 2007 | 8/24-9/06 | 4                  | 6                     | 4              | 66.7      | 4       | 30          | 2       | 50           |
| CN                         | 2008 | 8/22-9/04 | 4                  | 4                     | 4              | 100.0     | 4       | 6           | 0       | 0            |

CN = Camp Navajo E = Early Season L = Late Season

---

# Elk (*Cervus elaphus*)

---

## *Natural History*

Elk were at one time thinly distributed in Arizona from the White and Blue mountains westward along the Mogollon Rim to near the San Francisco Peaks. These native elk were eliminated sometime prior to 1900. In February 1913, private conservationists released 83 elk from Yellowstone National Park into Cabin Draw near Chevelon Creek. These, and two other transplants of Yellowstone elk in the 1920s—one south of Alpine, and another north of Williams—were great successes, and Arizona's elk population has now grown to approximately 24,000 post-hunt adults as of 2003.

Mountain meadows, ponderosa pine woodlands, spruce-fir forests, and other high elevation habitats between 7,000 and 10,500 feet elevation constitute the elk's principal summer range. Elk are rarely found more

than one-half mile from water and tend to stay on the summer range as long as possible, arriving early in the year and remaining until forced down by deep snow. Their winter range, which is usually between 5,500 and 6,500 feet elevation, is more limited in extent and may only comprise about 10 percent of the animal's total habitat. Here, in the pinyon-juniper zone, elk remain until melting snows allow them to migrate upward.

Elk have distinct summer and winter coats, which they shed in late summer and spring, respectively. In winter, the head, belly, neck, and legs are dark brown, and the sides and back are a grayish-brown; the rump patch is a yellowish color bordered by a dark brownish stripe. While females are usually somewhat lighter in color than bulls, both sexes have heavy dark manes. In summer, the coat becomes a deep reddish brown. Elk

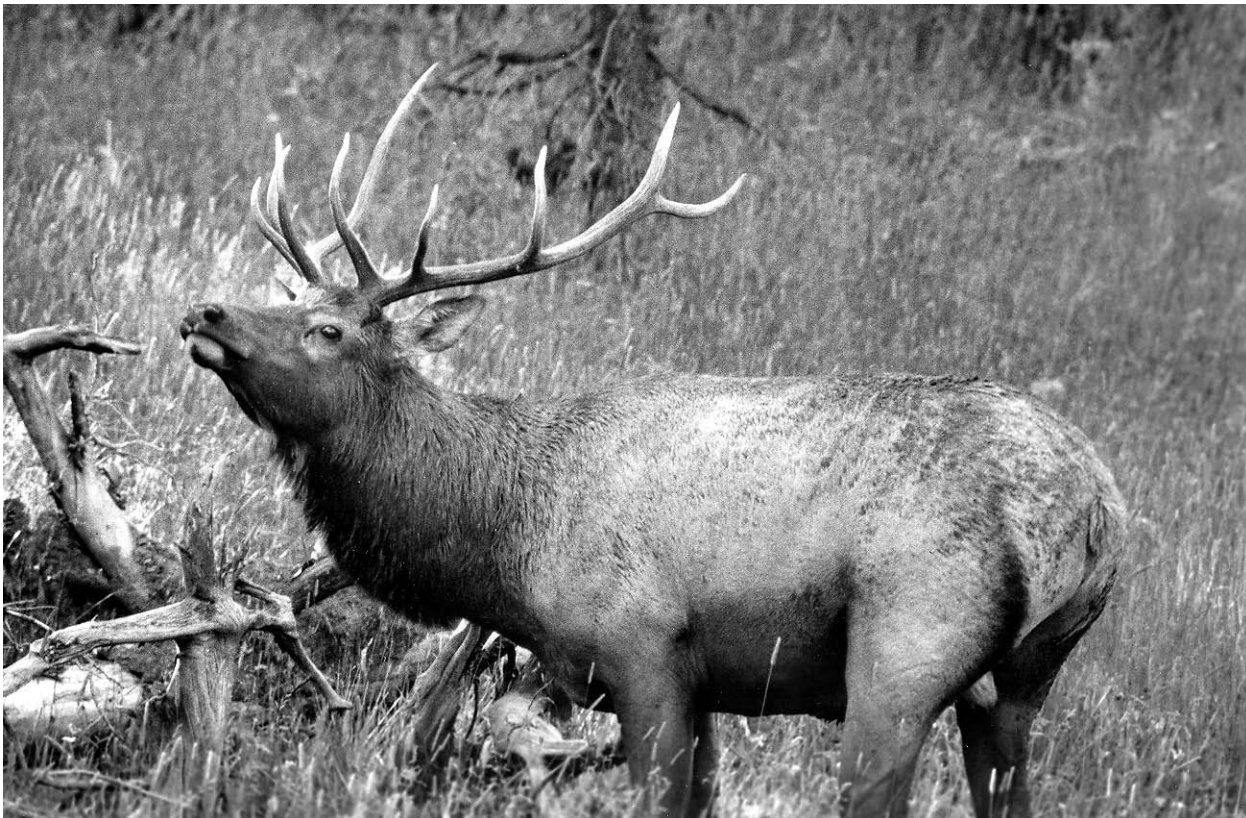

DAVE DAUGTRY

have little to no undercoat, giving them a sleek, muscular appearance.

Calves are born between late May and early June after an 8-month gestation period. They are dark russet in color with white spots on the back and sides. Newly born calves weigh an average of nearly 30 pounds, with males averaging 4 pounds more than females. Twins are extremely rare.

When the time comes to give birth, a cow will drive off her previous year's calf and separate from the herd to seek out an area of dense cover for a nursery. Within hours after birth, the newborn is able to move and is led from the birthing spot to a safer place. After a week, the mother will band with other cow elk, and after two to three weeks, the calves, now able to run, will join the herd. Some of these matriarchal bands may number in the hundreds. By September, the calves will have shed

their spotted coats and will be behaving much like their mothers.

An elk's natural life span is about 14 to 16 years for males and 15 to 17 for females, even though tagged animals of more than 25 years old have been documented.

Antler development and size is a function of age, the

## Elk distribution

older, larger bulls having the most developed antlers. Old bulls shed their antlers between January and March, and yearling males sometime between March and June. As soon as antlers are shed, new ones begin growing, so it is possible to see yearlings with old spikes and bulls in velvet at the same time. The antlers continue to grow for a period ranging from 90 days for yearlings to 150 days for adult bulls.

By early August, antler growth is complete. The now dry velvet is stripped off the hardened antlers in a matter of hours as the bull polishes them against trees. By early September, the bull is in the rut, and bugling and harem formation occurs. Harems may number up to 30, depending on the size and vigor of the bull, but usually average 15 to 20.

A large bull may weigh up to 1,200 pounds, but most range between 600 to 800 pounds. The live weight of mature cows ranges from 450 to 600 pounds. Elk evolved as distance runners and can approach speeds of 40 mph for short periods, and maintain speeds of nearly 30 mph for longer periods. They are also strong swimmers—even calves can swim more than a mile—and high jumpers, a 10-foot fence may not stop an adult.

Elk are grass-eating animals, and one of the requirements of feeding in open country is to always be on the alert for danger. As herd animals, some elk can always be watching for predators while the others feed.

## Hunt History

As with many game species in Arizona, elk hunting has had its ups and downs. With native elk having been extirpated, the closed season imposed by the territorial legislature in 1893 was too little too late. The releases of Yellowstone elk between 1913 and 1929 were successful, however, and in 1935 the population was deemed sufficient to support a limited, 266-permit bull hunt. One hundred and forty-five elk were harvested, and hunts were continued every year through 1943.

Because of World War II, no season was conducted in 1944 or 1945, but a limited hunt, which included the issuance of the first cow elk permits, was again authorized in 1946. Elk hunting opportunities expanded almost annually as biologists and ranchers feared that Arizona's elk population might now "rise out of control." These concerns culminated in 1953 when 6,288 permits were issued and 1,558 elk were taken—more than 1,000 of which were cows. Because of concerns about the "slaughter," elk permits were greatly curtailed in 1954 and remained below 5,000 until 1965, when more than 6,000 permits were again authorized. By 1967, elk permit numbers were exceeding 7,000, and the annual harvest exceeded 1,500 elk. Once again, elk permits were gradually lowered, although new hunts, including archery hunts, were being initiated.

By the mid-1980s, elk, and elk permit numbers, were again headed upward. This trend culminated in 1994, when nearly 11,000 elk were harvested—a number unimaginable just 20 years earlier. Since then, elk numbers and harvests have remained at a high level with more than 9,800 elk taken in 1999. This situation is expected to continue for the foreseeable future as wildlife managers and land managers continue to be concerned about habitat quality and elk-livestock competition.

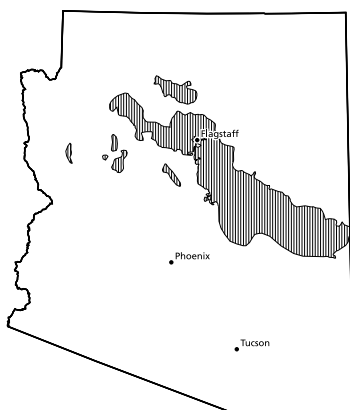

# Elk Survey Data

## Historic Summary of Elk Survey Data

| Year | Spike | Bull | Cow  | Calf | Unclassified | Total | Bulls <sup>1</sup> /100 Cows | Calves/100 Cows |
|------|-------|------|------|------|--------------|-------|------------------------------|-----------------|
| 1947 | 17    | 89   | 332  | 129  | 0            | 567   | 32                           | 39              |
| 1948 | 44    | 138  | 357  | 182  | 0            | 721   | 51                           | 51              |
| 1949 | 45    | 101  | 309  | 129  | 0            | 584   | 47                           | 42              |
| 1950 | 30    | 91   | 290  | 141  | 0            | 552   | 42                           | 49              |
| 1951 | 27    | 121  | 293  | 116  | 4            | 561   | 51                           | 40              |
| 1952 | 11    | 93   | 241  | 93   | 0            | 438   | 43                           | 39              |
| 1953 | 35    | 92   | 206  | 78   | 0            | 411   | 62                           | 38              |
| 1954 | 14    | 77   | 202  | 79   | 35           | 407   | 45                           | 39              |
| 1955 | 21    | 88   | 221  | 73   | 37           | 440   | 49                           | 33              |
| 1956 | 14    | 48   | 122  | 54   | 15           | 253   | 51                           | 44              |
| 1957 | 13    | 70   | 111  | 48   | 34           | 276   | 75                           | 43              |
| 1958 | 10    | 62   | 74   | 40   | 16           | 202   | 97                           | 54              |
| 1959 | 22    | 87   | 152  | 79   | 49           | 389   | 72                           | 52              |
| 1960 | 23    | 43   | 127  | 70   | 37           | 300   | 52                           | 55              |
| 1961 | 33    | 83   | 172  | 80   | 23           | 391   | 67                           | 47              |
| 1962 | 18    | 51   | 164  | 86   | 16           | 335   | 42                           | 52              |
| 1963 | 53    | 111  | 288  | 138  | 54           | 644   | 57                           | 48              |
| 1964 | 25    | 94   | 228  | 124  | 51           | 522   | 52                           | 54              |
| 1965 | 41    | 86   | 284  | 167  | 57           | 635   | 45                           | 59              |
| 1966 | 54    | 121  | 387  | 233  | 41           | 836   | 45                           | 60              |
| 1967 | 100   | 124  | 446  | 267  | 24           | 961   | 50                           | 60              |
| 1968 | 39    | 132  | 486  | 271  | 21           | 949   | 35                           | 56              |
| 1969 | 61    | 147  | 526  | 296  | 40           | 1070  | 40                           | 56              |
| 1970 | 53    | 96   | 469  | 256  | 96           | 970   | 32                           | 55              |
| 1971 | 86    | 148  | 495  | 267  | 270          | 1266  | 47                           | 54              |
| 1972 | 67    | 126  | 471  | 274  | 150          | 1088  | 41                           | 58              |
| 1973 | 56    | 88   | 438  | 280  | 230          | 1092  | 33                           | 64              |
| 1974 | 60    | 126  | 597  | 353  | 244          | 1380  | 31                           | 59              |
| 1975 | 68    | 139  | 598  | 393  | 192          | 1390  | 35                           | 66              |
| 1976 | 85    | 148  | 546  | 330  | 158          | 1267  | 43                           | 60              |
| 1977 | 93    | 185  | 678  | 404  | 117          | 1477  | 41                           | 60              |
| 1978 | 122   | 158  | 775  | 473  | 68           | 1596  | 36                           | 61              |
| 1979 | 156   | 196  | 1142 | 602  | 66           | 2162  | 31                           | 53              |
| 1980 | 53    | 109  | 601  | 338  | 82           | 1183  | 27                           | 56              |
| 1981 | 125   | 276  | 1121 | 618  | 199          | 2339  | 36                           | 55              |
| 1982 | 163   | 154  | 1264 | 707  | 86           | 2374  | 25                           | 56              |
| 1983 | 175   | 199  | 1186 | 691  | 43           | 2294  | 32                           | 58              |
| 1984 | 365   | 281  | 2032 | 1172 | 131          | 3981  | 32                           | 58              |
| 1985 | 286   | 250  | 1693 | 978  | 285          | 3492  | 32                           | 58              |
| 1986 | 274   | 245  | 1827 | 903  | 204          | 3453  | 28                           | 49              |
| 1987 | 384   | 405  | 2671 | 1504 | 203          | 5167  | 30                           | 56              |
| 1988 | 447   | 434  | 2810 | 1537 | 263          | 5491  | 31                           | 55              |
| 1989 | 752   | 599  | 4306 | 2142 | 461          | 8260  | 31                           | 50              |
| 1990 | 647   | 678  | 4405 | 1813 | 198          | 7741  | 30                           | 41              |
| 1991 | 639   | 869  | 5354 | 2860 | 931          | 10653 | 28                           | 53              |
| 1992 | 947   | 895  | 5647 | 2671 | 399          | 10559 | 33                           | 47              |
| 1993 | 926   | 889  | 7698 | 3892 | 324          | 13729 | 24                           | 51              |
| 1994 | 934   | 1080 | 6530 | 2807 | 591          | 11942 | 31                           | 43              |
| 1995 | 837   | 1111 | 6793 | 2809 | 105          | 11655 | 29                           | 41              |
| 1996 | 869   | 1348 | 7493 | 2559 | 255          | 12524 | 30                           | 34              |
| 1997 | 727   | 1383 | 6461 | 2423 | 178          | 11172 | 33                           | 38              |
| 1998 | 670   | 1535 | 7052 | 3440 | 131          | 12828 | 31                           | 49              |
| 1999 | 986   | 1330 | 6397 | 2901 | 432          | 12046 | 36                           | 45              |
| 2000 | 965   | 1300 | 7684 | 3013 | 161          | 13123 | 29                           | 39              |
| 2001 | 400   | 1224 | 4540 | 1251 | 29           | 7444  | 36                           | 28              |
| 2002 | 344   | 1217 | 5409 | 1842 | 53           | 8865  | 29                           | 34              |
| 2003 | 489   | 1460 | 4732 | 1589 | 117          | 8387  | 41                           | 34              |
| 2004 | 493   | 1347 | 4585 | 2289 | 195          | 8909  | 40                           | 50              |
| 2005 | 378   | 1082 | 4136 | 1894 | 62           | 7552  | 35                           | 46              |
| 2006 | 592   | 1261 | 4984 | 1847 | 170          | 8854  | 37                           | 37              |
| 2007 | 473   | 1077 | 4328 | 1641 | 2            | 7521  | 36                           | 38              |
| 2008 | 336   | 1186 | 3764 | 1448 | 29           | 6763  | 40                           | 38              |

<sup>1</sup>Includes spikes



# Elk Survey Data

## 5-Year: 2004-2008 Elk Survey Data

| Unit  | Year | Spike | Bull | Cow | Calf | Unclassified | Total | Bulls <sup>1</sup> /100 Cows | Calves/100 Cows |
|-------|------|-------|------|-----|------|--------------|-------|------------------------------|-----------------|
| 1     | 2004 | 36    | 122  | 311 | 141  | 6            | 616   | 51                           | 45              |
| 1     | 2005 | 39    | 105  | 398 | 165  | 0            | 707   | 36                           | 41              |
| 1     | 2006 | 81    | 164  | 544 | 174  | 62           | 1025  | 45                           | 32              |
| 1     | 2007 | 82    | 113  | 501 | 217  | 0            | 913   | 39                           | 43              |
| 1     | 2008 | 66    | 189  | 673 | 257  | 0            | 1185  | 38                           | 38              |
| 2B    | 2004 | 5     | 37   | 53  | 20   | 0            | 115   | 79                           | 38              |
| 3A/3C | 2004 | 18    | 76   | 242 | 148  | 0            | 484   | 39                           | 61              |
| 3A/3C | 2005 | 3     | 114  | 377 | 197  | 0            | 691   | 31                           | 52              |
| 3A/3C | 2006 | 17    | 65   | 311 | 134  | 0            | 527   | 26                           | 43              |
| 3A/3C | 2007 | 54    | 122  | 395 | 193  | 0            | 764   | 45                           | 49              |
| 3A/3C | 2008 | 34    | 34   | 173 | 85   | 0            | 326   | 39                           | 49              |
| 3B    | 2004 | 1     | 14   | 48  | 20   | 0            | 83    | 31                           | 42              |
| 3B    | 2005 | 6     | 20   | 56  | 27   | 0            | 109   | 46                           | 48              |
| 3B    | 2006 | 8     | 13   | 38  | 15   | 0            | 74    | 55                           | 39              |
| 3B    | 2007 | 5     | 10   | 46  | 19   | 0            | 80    | 33                           | 41              |
| 3B    | 2008 | 8     | 12   | 51  | 10   | 0            | 81    | 39                           | 20              |
| 4A    | 2004 | 17    | 50   | 185 | 74   | 1            | 327   | 36                           | 40              |
| 4A    | 2005 | 17    | 53   | 167 | 68   | 5            | 310   | 42                           | 41              |
| 4A    | 2006 | 40    | 42   | 255 | 75   | 5            | 417   | 32                           | 29              |
| 4A    | 2007 | 23    | 56   | 140 | 63   | 0            | 282   | 56                           | 45              |
| 4A    | 2008 | 20    | 55   | 133 | 58   | 0            | 266   | 56                           | 44              |
| 4B    | 2004 | 10    | 31   | 84  | 32   | 0            | 157   | 49                           | 38              |
| 4B    | 2005 | 2     | 51   | 93  | 33   | 0            | 179   | 57                           | 35              |
| 4B    | 2006 | 7     | 25   | 81  | 30   | 0            | 143   | 40                           | 37              |
| 4B    | 2007 | 9     | 45   | 100 | 43   | 0            | 197   | 54                           | 43              |
| 4B    | 2008 | 5     | 19   | 27  | 5    | 0            | 56    | 89                           | 19              |
| 5A    | 2004 | 18    | 46   | 201 | 113  | 2            | 380   | 32                           | 56              |
| 5A    | 2005 | 17    | 38   | 220 | 112  | 14           | 401   | 25                           | 51              |
| 5A    | 2006 | 30    | 82   | 263 | 98   | 0            | 473   | 43                           | 37              |
| 5A    | 2007 | 11    | 57   | 154 | 66   | 1            | 289   | 44                           | 43              |
| 5A    | 2008 | 19    | 89   | 156 | 72   | 0            | 336   | 69                           | 46              |
| 5BN   | 2004 | 49    | 91   | 254 | 101  | 0            | 495   | 55                           | 40              |
| 5BN   | 2005 | 36    | 86   | 238 | 62   | 0            | 422   | 51                           | 26              |
| 5BN   | 2006 | 15    | 34   | 194 | 73   | 0            | 316   | 25                           | 38              |
| 5BN   | 2007 | 16    | 86   | 241 | 82   | 0            | 425   | 42                           | 34              |
| 5BN   | 2008 | 25    | 85   | 240 | 59   | 0            | 409   | 46                           | 25              |
| 5BS   | 2004 | 59    | 105  | 532 | 285  | 0            | 981   | 31                           | 54              |
| 5BS   | 2005 | 32    | 72   | 358 | 155  | 0            | 617   | 29                           | 43              |
| 5BS   | 2006 | 31    | 118  | 574 | 182  | 3            | 908   | 26                           | 32              |
| 5BS   | 2007 | 21    | 39   | 202 | 54   | 0            | 316   | 30                           | 27              |
| 5BS   | 2008 | 18    | 60   | 348 | 91   | 0            | 517   | 22                           | 26              |
| 6A    | 2004 | 67    | 93   | 407 | 252  | 0            | 819   | 39                           | 62              |
| 6A    | 2005 | 38    | 121  | 309 | 190  | 4            | 662   | 51                           | 61              |
| 6A    | 2006 | 99    | 111  | 657 | 209  | 0            | 1076  | 32                           | 32              |
| 6A    | 2007 | 38    | 61   | 344 | 121  | 0            | 564   | 29                           | 35              |
| 6A    | 2008 | 6     | 59   | 193 | 58   | 3            | 319   | 34                           | 30              |
| 6B    | 2004 | 13    | 39   | 90  | 54   | 0            | 196   | 58                           | 60              |
| 6B    | 2005 | 12    | 17   | 108 | 52   | 0            | 189   | 27                           | 48              |
| 6B    | 2006 | 48    | 38   | 117 | 60   | 51           | 314   | 74                           | 51              |
| 6B    | 2007 | 14    | 18   | 144 | 62   | 0            | 238   | 22                           | 43              |
| 6B    | 2008 | 8     | 18   | 73  | 37   | 1            | 137   | 36                           | 51              |
| 7     | 2004 | 17    | 25   | 242 | 129  | 14           | 427   | 17                           | 53              |
| 7     | 2005 | 25    | 47   | 181 | 62   | 0            | 315   | 40                           | 34              |
| 7E    | 2006 | 16    | 40   | 159 | 71   | 1            | 287   | 35                           | 45              |
| 7E    | 2007 | 11    | 24   | 66  | 34   | 0            | 135   | 53                           | 52              |
| 7E    | 2008 | 15    | 43   | 77  | 50   | 0            | 185   | 75                           | 65              |
| 7W    | 2006 | 30    | 41   | 205 | 91   | 0            | 367   | 35                           | 44              |
| 7W    | 2007 | 41    | 38   | 328 | 103  | 0            | 510   | 24                           | 31              |
| 7W    | 2008 | 6     | 26   | 165 | 67   | 0            | 264   | 19                           | 41              |
| 8     | 2004 | 39    | 36   | 294 | 128  | 0            | 497   | 26                           | 44              |
| 8     | 2005 | 40    | 13   | 155 | 78   | 34           | 320   | 34                           | 50              |
| 8     | 2006 | 35    | 38   | 223 | 78   | 0            | 374   | 33                           | 35              |
| 8     | 2007 | 14    | 23   | 146 | 51   | 0            | 234   | 25                           | 35              |

<sup>1</sup> Includes spikes

## Elk Survey Data

### 5-Year: 2004-2008 Elk Survey Data

| Unit | Year | Spike | Bull | Cow | Calf | Unclassified | Total | Bulls <sup>1</sup> /100 Cows | Calves/100 Cows |
|------|------|-------|------|-----|------|--------------|-------|------------------------------|-----------------|
| 8    | 2008 | 6     | 29   | 98  | 43   | 12           | 188   | 36                           | 44              |
| 9    | 2004 | 27    | 169  | 388 | 207  | 15           | 806   | 51                           | 53              |
| 9    | 2005 | 18    | 72   | 213 | 122  | 0            | 425   | 42                           | 57              |
| 9    | 2006 | 23    | 111  | 320 | 137  | 36           | 627   | 42                           | 43              |
| 9    | 2007 | 23    | 53   | 315 | 81   | 0            | 472   | 24                           | 26              |
| 9    | 2008 | 23    | 85   | 178 | 74   | 8            | 368   | 61                           | 42              |
| 10   | 2004 | 33    | 108  | 398 | 189  | 148          | 876   | 35                           | 47              |
| 10   | 2005 | 56    | 90   | 558 | 267  | 0            | 971   | 26                           | 48              |
| 10   | 2006 | 13    | 40   | 109 | 52   | 2            | 216   | 49                           | 48              |
| 10   | 2007 | 17    | 47   | 175 | 48   | 0            | 287   | 37                           | 27              |
| 10   | 2008 | 0     | 57   | 165 | 67   | 0            | 289   | 35                           | 41              |
| 18A  | 2004 | 11    | 27   | 51  | 26   | 0            | 115   | 75                           | 51              |
| 18B  | 2006 | 0     | 0    | 0   | 2    | 2            | 4     | —                            | —               |
| 19B  | 2006 | 0     | 7    | 0   | 0    | 2            | 9     | —                            | —               |
| 21   | 2005 | 0     | 8    | 20  | 8    | 0            | 36    | 40                           | 40              |
| 21   | 2006 | 0     | 9    | 15  | 6    | 0            | 30    | 60                           | 40              |
| 21   | 2007 | 2     | 7    | 14  | 2    | 0            | 25    | 64                           | 14              |
| 21   | 2008 | 0     | 11   | 23  | 8    | 0            | 42    | 48                           | 35              |
| 22   | 2004 | 25    | 118  | 197 | 89   | 2            | 431   | 73                           | 45              |
| 22   | 2005 | 7     | 53   | 123 | 62   | 0            | 245   | 49                           | 50              |
| 22   | 2006 | 47    | 128  | 329 | 145  | 0            | 649   | 53                           | 44              |
| 22   | 2007 | 40    | 115  | 278 | 113  | 0            | 546   | 56                           | 41              |
| 22   | 2008 | 25    | 100  | 274 | 92   | 0            | 491   | 46                           | 34              |
| 22N  | 2007 | 0     | 3    | 6   | 2    | 0            | 11    | 50                           | 33              |
| 23   | 2004 | 16    | 91   | 202 | 80   | 5            | 394   | 53                           | 40              |
| 23   | 2005 | 16    | 94   | 237 | 102  | 3            | 452   | 46                           | 43              |
| 23   | 2006 | 23    | 101  | 196 | 65   | 0            | 385   | 63                           | 33              |
| 23   | 2007 | 11    | 88   | 204 | 69   | 1            | 373   | 49                           | 34              |
| 23   | 2008 | 30    | 124  | 342 | 154  | 0            | 650   | 45                           | 45              |
| 23N  | 2007 | 0     | 9    | 28  | 11   | 0            | 48    | 32                           | 39              |
| 27   | 2004 | 15    | 32   | 143 | 52   | 2            | 244   | 33                           | 36              |
| 27   | 2005 | 9     | 18   | 117 | 42   | 2            | 188   | 23                           | 36              |
| 27   | 2006 | 18    | 45   | 214 | 63   | 6            | 346   | 29                           | 29              |
| 27   | 2007 | 6     | 38   | 116 | 32   | 0            | 192   | 38                           | 28              |
| 27   | 2008 | 10    | 28   | 143 | 58   | 5            | 244   | 27                           | 41              |
| CN   | 2004 | 17    | 37   | 263 | 149  | 0            | 466   | 21                           | 57              |
| CN   | 2005 | 5     | 10   | 208 | 90   | 0            | 313   | 7                            | 43              |
| CN   | 2006 | 11    | 9    | 180 | 87   | 0            | 287   | 11                           | 48              |
| CN   | 2007 | 35    | 25   | 385 | 175  | 0            | 620   | 16                           | 45              |
| CN   | 2008 | 12    | 63   | 232 | 103  | 0            | 410   | 32                           | 44              |

<sup>1</sup> Includes spikes

CN = Camp Navajo

# Elk Harvest Data

## Historic Summary of General Elk Hunts

| Year | 1st Choice Applicants | Permits Issued | Hunters | Hunter Days | Harvest <sup>1</sup> |        |      |        |       | Percent Success |
|------|-----------------------|----------------|---------|-------------|----------------------|--------|------|--------|-------|-----------------|
|      |                       |                |         |             | Bulls                | Spikes | Cows | Calves | Total |                 |
| 1935 | –                     | –              | 266     | –           | 137                  | 8      | 0    | 0      | 145   | 55              |
| 1936 | –                     | –              | 249     | –           | 76                   | 9      | 0    | 0      | 85    | 34              |
| 1937 | –                     | –              | 230     | –           | 47                   | 18     | 0    | 0      | 65    | 28              |
| 1938 | –                     | –              | 169     | –           | 68                   | 17     | 0    | 0      | 85    | 50              |
| 1939 | –                     | –              | 238     | –           | 77                   | 27     | 6    | 0      | 110   | 46              |
| 1940 | –                     | –              | 229     | –           | 76                   | 19     | 0    | 0      | 95    | 41              |
| 1941 | –                     | –              | 581     | –           | 114                  | 19     | 0    | 0      | 133   | 23              |
| 1942 | –                     | –              | 1167    | –           | 223                  | 96     | 0    | 0      | 319   | 27              |
| 1943 | –                     | –              | 2047    | –           | 152                  | 98     | 0    | 0      | 250   | 12              |
| 1946 | –                     | –              | 498     | –           | 103                  | 0      | 13   | 0      | 116   | 23              |
| 1947 | –                     | –              | 1616    | –           | 246                  | 0      | 255  | 0      | 501   | 31              |
| 1948 | –                     | –              | 2200    | –           | 453                  | 0      | 467  | 0      | 920   | 42              |
| 1949 | –                     | 2850           | 2675    | –           | 290                  | 0      | 566  | 0      | 856   | 32              |
| 1950 | –                     | 4250           | 3685    | –           | 413                  | 1      | 1070 | 0      | 1484  | 40              |
| 1951 | –                     | 6023           | 5788    | –           | 467                  | 41     | 1185 | 0      | 1693  | 29              |
| 1952 | –                     | 5476           | 5192    | –           | 302                  | 42     | 845  | 0      | 1189  | 23              |
| 1953 | –                     | 6288           | 6015    | –           | 380                  | 124    | 1054 | 0      | 1558  | 26              |
| 1954 | –                     | 2985           | 2846    | –           | 176                  | 58     | 395  | 0      | 629   | 22              |
| 1955 | –                     | 2225           | 2096    | –           | 207                  | 58     | 347  | 0      | 612   | 29              |
| 1956 | –                     | 1750           | 1581    | –           | 115                  | 29     | 119  | 39     | 302   | 19              |
| 1957 | –                     | 1275           | 1074    | –           | 123                  | 0      | 0    | 0      | 123   | 11              |
| 1958 | –                     | 1483           | 1321    | –           | 181                  | 0      | 0    | 0      | 181   | 14              |
| 1959 | –                     | –              | 1136    | –           | 282                  | 0      | 0    | 0      | 282   | 25              |
| 1960 | –                     | –              | 1661    | –           | 312                  | 93     | 131  | 54     | 590   | 36              |
| 1961 | –                     | –              | 1492    | –           | 343                  | 104    | 107  | 34     | 588   | 39              |
| 1962 | –                     | –              | 2266    | –           | 402                  | 110    | 172  | 86     | 770   | 34              |
| 1963 | –                     | –              | 3184    | –           | 528                  | 180    | 339  | 107    | 1154  | 36              |
| 1964 | –                     | –              | 4060    | –           | 566                  | 163    | 338  | 126    | 1193  | 29              |
| 1965 | –                     | –              | 4941    | –           | 590                  | 185    | 426  | 168    | 1369  | 28              |
| 1966 | 7811                  | –              | 5687    | –           | 709                  | 241    | 500  | 188    | 1638  | 29              |
| 1967 | 7730                  | –              | 6526    | –           | 745                  | 304    | 442  | 191    | 1682  | 26              |
| 1968 | 8379                  | –              | 5845    | –           | 613                  | 279    | 376  | 135    | 1403  | 24              |
| 1969 | 9843                  | –              | 5771    | –           | 551                  | 266    | 355  | 87     | 1259  | 22              |
| 1970 | 11888                 | –              | 5208    | –           | 500                  | 239    | 202  | 77     | 1018  | 20              |
| 1971 | 10812                 | –              | 4866    | –           | 742                  | 407    | 330  | 105    | 1584  | 33              |
| 1972 | 12644                 | 5561           | 5177    | –           | 423                  | 279    | 267  | 84     | 1053  | 20              |
| 1973 | 16078                 | 5675           | 5321    | –           | 460                  | 296    | 295  | 91     | 1142  | 21              |
| 1974 | 18623                 | 5972           | 5685    | 27227       | 437                  | 368    | 309  | 72     | 1186  | 21              |
| 1975 | 19504                 | 5758           | 5088    | 21248       | 443                  | 317    | 172  | 44     | 976   | 19              |
| 1976 | 20511                 | 5915           | 5528    | 23808       | 478                  | 438    | 343  | 89     | 1348  | 24              |
| 1977 | 23198                 | 6145           | 5792    | 26294       | 556                  | 376    | 406  | 71     | 1409  | 24              |
| 1978 | 26745                 | 5935           | 5502    | 22409       | 571                  | 510    | 425  | 95     | 1601  | 29              |
| 1979 | 27041                 | 5800           | 5456    | 24344       | 534                  | 485    | 390  | 65     | 1474  | 27              |
| 1980 | 28198                 | 5850           | 5479    | 26554       | 584                  | 499    | 422  | 68     | 1573  | 29              |
| 1981 | 28286                 | 5385           | 5093    | 22952       | 796                  | 606    | 390  | 81     | 1873  | 37              |
| 1982 | 26507                 | 5720           | 5522    | 24529       | 816                  | 735    | 400  | 96     | 2047  | 37              |
| 1983 | 29572                 | 6060           | 5757    | 24741       | 732                  | 776    | 405  | 96     | 2009  | 35              |
| 1984 | 28780                 | 6005           | 5791    | 24496       | 995                  | 1031   | 442  | 74     | 2542  | 44              |
| 1985 | 31121                 | 6730           | 6450    | 25782       | 1159                 | 1169   | 867  | 220    | 3415  | 53              |
| 1986 | 33437                 | 6385           | 6202    | 27613       | 1155                 | 1115   | 592  | 126    | 2988  | 48              |
| 1987 | 34995                 | 6300           | 6164    | 26477       | 1209                 | 1010   | 693  | 91     | 3003  | 49              |
| 1988 | 37289                 | 6955           | 6785    | 25600       | 1376                 | 1165   | 1162 | 224    | 3927  | 58              |
| 1989 | 38965                 | 7975           | 7796    | 28980       | 1473                 | 1144   | 1069 | 184    | 3870  | 50              |
| 1990 | 41616                 | 8585           | 8389    | 29148       | 1790                 | 1233   | 1510 | 188    | 4721  | 56              |
| 1991 | 41415                 | 9718           | 9349    | 30811       | 2047                 | 1207   | 1784 | 271    | 5309  | 57              |
| 1992 | 49054                 | 10491          | 10207   | 34757       | 2028                 | 1351   | 2067 | 262    | 5708  | 56              |
| 1993 | 51919                 | 11579          | 11309   | 38157       | 2011                 | 962    | 3106 | 445    | 6524  | 58              |
| 1994 | 60849                 | 14683          | 14382   | 46962       | 2201                 | 1121   | 4867 | 630    | 8819  | 61              |
| 1995 | 63582                 | 14891          | 14613   | 50862       | 2368                 | 794    | 4132 | 522    | 7816  | 53              |
| 1996 | 63003                 | 14229          | 13897   | 46444       | 2553                 | 936    | 4262 | 512    | 8263  | 59              |
| 1997 | 66013                 | 11683          | 11398   | 41591       | 2590                 | 583    | 2490 | 306    | 6269  | 55              |
| 1998 | 66823                 | 12110          | 11832   | 43552       | 2423                 | 664    | 2744 | 385    | 6216  | 53              |

<sup>1</sup> In some years prior to 1960, spikes and calves were not differentiated from bulls and cows.

# Elk Harvest Data

## Historic Summary of General Elk Hunts

| Year | 1st Choice Applicants | Permits Issued | Hunters | Hunter Days | Harvest <sup>1</sup> |        |      |        |       | Percent Success |
|------|-----------------------|----------------|---------|-------------|----------------------|--------|------|--------|-------|-----------------|
|      |                       |                |         |             | Bulls                | Spikes | Cows | Calves | Total |                 |
| 1999 | 71839                 | 15538          | 15158   | 55291       | 2082                 | 724    | 4037 | 556    | 7399  | 49              |
| 2000 | 66652                 | 15460          | 14940   | 54195       | 2260                 | 724    | 3956 | 475    | 7415  | 50              |
| 2001 | 70809                 | 18285          | 17628   | 66564       | 2214                 | 393    | 4348 | 375    | 7330  | 42              |
| 2002 | 69798                 | 16265          | 15767   | 62497       | 2276                 | 282    | 3482 | 309    | 6349  | 40              |
| 2003 | 71514                 | 13402          | 12983   | 52398       | 1949                 | 313    | 2690 | 288    | 5240  | 40              |
| 2004 | 76542                 | 14967          | 14399   | 56288       | 2159                 | 357    | 3191 | 405    | 6112  | 42              |
| 2005 | 64684                 | 15856          | 15254   | 63702       | 2077                 | 367    | 3034 | 376    | 5585  | 38              |
| 2006 | 66873                 | 16321          | 15773   | 68255       | 2303                 | 532    | 3369 | 340    | 6544  | 41              |
| 2007 | 65190                 | 16848          | 16189   | 72481       | 2412                 | 496    | 3221 | 373    | 6502  | 40              |
| 2008 | 52044                 | 17756          | 16968   | 77827       | 2712                 | 444    | 3188 | 371    | 6715  | 40              |

<sup>1</sup>In some years prior to 1960, spikes and calves were not differentiated from bulls and cows.

## Historic Summary of Juniors-Only Elk Hunts

| Year | 1st Choice Applicants | Permits Issued | Hunters | Hunter Days | Harvest |        |      |        |       | Percent Success |
|------|-----------------------|----------------|---------|-------------|---------|--------|------|--------|-------|-----------------|
|      |                       |                |         |             | Bulls   | Spikes | Cows | Calves | Total |                 |
| 1994 | 269                   | 75             | 75      | 233         | 0       | 0      | 23   | 8      | 31    | 41              |
| 1995 | 291                   | 100            | 100     | 233         | 0       | 0      | 59   | 6      | 65    | 65              |
| 1996 | 409                   | 175            | 173     | 466         | 0       | 0      | 94   | 9      | 103   | 60              |
| 1997 | 654                   | 200            | 195     | 526         | 0       | 0      | 101  | 14     | 115   | 59              |
| 1998 | 927                   | 400            | 391     | 1061        | 0       | 0      | 208  | 31     | 239   | 61              |
| 1999 | 1372                  | 1185           | 1162    | 3017        | 0       | 0      | 574  | 88     | 662   | 57              |
| 2000 | 2022                  | 1200           | 1173    | 2959        | 0       | 0      | 638  | 68     | 706   | 60              |
| 2001 | 2416                  | 1370           | 1352    | 3744        | 0       | 0      | 543  | 50     | 593   | 43              |
| 2002 | 2705                  | 1088           | 1066    | 2923        | 0       | 0      | 498  | 51     | 549   | 52              |
| 2003 | 2744                  | 1076           | 1054    | 2891        | 0       | 0      | 470  | 62     | 532   | 50              |
| 2003 | 2744                  | 1076           | 1054    | 2891        | 0       | 0      | 470  | 62     | 532   | 50              |
| 2004 | 2668                  | 1025           | 996     | 2555        | 0       | 0      | 532  | 76     | 608   | 61              |
| 2005 | 2462                  | 1161           | 1123    | 3139        | 0       | 0      | 459  | 68     | 527   | 47              |
| 2006 | 2580                  | 1142           | 1100    | 3286        | 0       | 0      | 532  | 53     | 585   | 53              |
| 2007 | 3017                  | 1181           | 1100    | 3286        | 0       | 0      | 618  | 59     | 677   | 60              |
| 2008 | 2817                  | 1335           | 1288    | 3786        | 0       | 0      | 573  | 92     | 665   | 52              |

## Historic Summary of Muzzleloader Elk Hunts

| Year | 1st Choice Applicants | Permits Issued | Hunters | Hunter Days | Harvest |        |      |        |       | Percent Success |
|------|-----------------------|----------------|---------|-------------|---------|--------|------|--------|-------|-----------------|
|      |                       |                |         |             | Bulls   | Spikes | Cows | Calves | Total |                 |
| 1980 | 138                   | 80             | 77      | 429         | 1       | 1      | 6    | 0      | 8     | 10              |
| 1981 | 98                    | 50             | 49      | 200         | 6       | 0      | 0    | 0      | 6     | 12              |
| 1982 | 381                   | 200            | 194     | 805         | 43      | 7      | 0    | 0      | 50    | 26              |
| 1983 | 420                   | 130            | 124     | 518         | 37      | 2      | 0    | 0      | 39    | 31              |
| 1984 | 854                   | 150            | 149     | 535         | 36      | 9      | 21   | 10     | 76    | 51              |
| 1985 | 880                   | 200            | 197     | 811         | 37      | 8      | 11   | 3      | 59    | 30              |
| 1986 | 1030                  | 200            | 200     | 753         | 57      | 12     | 25   | 1      | 95    | 48              |
| 1987 | 1307                  | 200            | 194     | 805         | 51      | 16     | 17   | 3      | 87    | 45              |
| 1988 | 1215                  | 225            | 222     | 809         | 56      | 12     | 69   | 4      | 141   | 64              |
| 1989 | 1089                  | 225            | 225     | 766         | 42      | 12     | 74   | 10     | 138   | 61              |
| 1990 | 1389                  | 225            | 223     | 886         | 47      | 3      | 37   | 10     | 97    | 43              |
| 1991 | 1876                  | 265            | 263     | 1066        | 116     | 11     | 19   | 4      | 150   | 57              |
| 1992 | 1313                  | 410            | 405     | 1472        | 46      | 8      | 150  | 18     | 222   | 55              |
| 1993 | 2244                  | 451            | 450     | 1766        | 145     | 16     | 89   | 14     | 264   | 59              |
| 1994 | 2953                  | 752            | 729     | 2796        | 133     | 12     | 167  | 36     | 348   | 48              |
| 1995 | 2707                  | 766            | 753     | 2788        | 128     | 6      | 238  | 38     | 410   | 54              |
| 1996 | 4227                  | 723            | 703     | 2802        | 96      | 5      | 156  | 22     | 279   | 40              |
| 1997 | 4486                  | 937            | 919     | 3588        | 172     | 26     | 125  | 23     | 346   | 38              |
| 1998 | 3819                  | 1120           | 1076    | 3947        | 163     | 24     | 217  | 20     | 424   | 39              |
| 1999 | 4118                  | 1183           | 1148    | 4438        | 159     | 38     | 198  | 28     | 423   | 37              |
| 2000 | 5115                  | 1168           | 1118    | 4033        | 225     | 27     | 199  | 47     | 498   | 45              |
| 2001 | 3591                  | 1495           | 1437    | 5580        | 209     | 13     | 235  | 21     | 478   | 33              |
| 2002 | 5287                  | 1015           | 977     | 3874        | 186     | 21     | 101  | 4      | 312   | 32              |
| 2003 | 5457                  | 1087           | 1054    | 4332        | 180     | 17     | 147  | 24     | 368   | 35              |
| 2004 | 4814                  | 1325           | 1279    | 5082        | 255     | 20     | 245  | 28     | 548   | 43              |

## Elk Harvest Data

### *Historic Summary of Muzzleloader Elk Hunts (continued)*

| Year | 1st Choice Applicants | Permits Issued | Hunters | Hunter Days | Harvest |        |      |        |       | Percent Success |
|------|-----------------------|----------------|---------|-------------|---------|--------|------|--------|-------|-----------------|
|      |                       |                |         |             | Bulls   | Spikes | Cows | Calves | Total |                 |
| 2005 | 4672                  | 1276           | 1217    | 5116        | 203     | 31     | 161  | 28     | 423   | 35              |
| 2006 | 5238                  | 1161           | 1101    | 4743        | 229     | 33     | 164  | 5      | 431   | 39              |
| 2007 | 4858                  | 1206           | 1179    | 4963        | 208     | 45     | 200  | 36     | 489   | 41              |
| 2008 | 4723                  | 1386           | 1327    | 6139        | 253     | 59     | 236  | 35     | 583   | 41              |

### *Historic Summary of Archery Elk Hunts*

| Year | 1st Choice Applicants | Permits Issued | Hunters | Hunter Days | Harvest |        |      |        |       | Percent Success |
|------|-----------------------|----------------|---------|-------------|---------|--------|------|--------|-------|-----------------|
|      |                       |                |         |             | Bulls   | Spikes | Cows | Calves | Total |                 |
| 1978 | 3756                  | 2865           | 2552    | 16941       | 62      | 38     | 46   | 1      | 147   | 6               |
| 1979 | 3854                  | 2990           | 2802    | 19069       | 110     | 74     | 68   | 2      | 254   | 9               |
| 1980 | 4265                  | 3450           | 3268    | 22590       | 164     | 57     | 91   | 9      | 321   | 10              |
| 1981 | 5037                  | 2925           | 2805    | 18562       | 136     | 41     | 48   | 9      | 234   | 8               |
| 1982 | 5092                  | 3600           | 3469    | 23906       | 154     | 75     | 61   | 12     | 302   | 9               |
| 1983 | 4454                  | 3935           | 3775    | 25370       | 216     | 93     | 93   | 10     | 412   | 11              |
| 1984 | 4738                  | 3760           | 3627    | 24543       | 208     | 105    | 80   | 12     | 405   | 11              |
| 1985 | 4954                  | 3810           | 3696    | 24602       | 198     | 127    | 136  | 24     | 485   | 13              |
| 1986 | 5574                  | 3699           | 3613    | 24471       | 281     | 135    | 125  | 26     | 567   | 16              |
| 1987 | 6236                  | 3680           | 3599    | 25528       | 301     | 152    | 161  | 29     | 643   | 18              |
| 1988 | 6807                  | 3615           | 3538    | 24391       | 308     | 123    | 188  | 17     | 636   | 18              |
| 1989 | 7776                  | 3925           | 3837    | 27019       | 418     | 161    | 254  | 15     | 848   | 22              |
| 1990 | 8357                  | 4230           | 4152    | 28730       | 545     | 126    | 191  | 19     | 881   | 21              |
| 1991 | 8900                  | 4806           | 4729    | 33141       | 549     | 137    | 381  | 39     | 1106  | 23              |
| 1992 | 9831                  | 5315           | 5184    | 35902       | 675     | 178    | 459  | 46     | 1358  | 26              |
| 1993 | 10201                 | 5318           | 5225    | 38027       | 587     | 151    | 479  | 56     | 1273  | 24              |
| 1994 | 11256                 | 6880           | 6731    | 46661       | 775     | 192    | 754  | 67     | 1788  | 27              |
| 1995 | 12167                 | 6780           | 6654    | 47049       | 874     | 160    | 750  | 50     | 1834  | 28              |
| 1996 | 12898                 | 5756           | 5638    | 41417       | 518     | 121    | 514  | 38     | 1191  | 21              |
| 1997 | 13807                 | 6151           | 6033    | 43221       | 887     | 84     | 547  | 44     | 1562  | 26              |
| 1998 | 15301                 | 5386           | 5288    | 35826       | 1074    | 65     | 631  | 55     | 1825  | 35              |
| 1999 | 17506                 | 5440           | 5303    | 38333       | 743     | 74     | 475  | 42     | 1334  | 25              |
| 2000 | 18268                 | 7168           | 6978    | 49801       | 675     | 129    | 998  | 79     | 1881  | 27              |
| 2001 | 17907                 | 8507           | 8271    | 54328       | 1169    | 79     | 922  | 57     | 2227  | 27              |
| 2002 | 18581                 | 5827           | 5662    | 42505       | 460     | 14     | 541  | 29     | 1044  | 18              |
| 2003 | 18833                 | 6708           | 6537    | 47439       | 1042    | 57     | 737  | 59     | 1895  | 29              |
| 2004 | 20597                 | 5577           | 5435    | 39360       | 962     | 35     | 584  | 56     | 1637  | 30              |
| 2005 | 20869                 | 6676           | 6491    | 46313       | 1143    | 82     | 890  | 78     | 2193  | 34              |
| 2006 | 22653                 | 6510           | 6367    | 45887       | 919     | 55     | 776  | 43     | 1793  | 28              |
| 2007 | 24684                 | 5132           | 4963    | 38251       | 910     | 62     | 458  | 33     | 1463  | 29              |
| 2008 | 21625                 | 5883           | 5675    | 44982       | 1241    | 73     | 357  | 23     | 1694  | 30              |

# Elk Hunt Data

## 5-Year: 2004-2008 Harvest

| Unit    |    | Year | Hunt Type | Dates       | Permits Authorized | 1st Choice Applicants | Permits Issued | Draw Odds | Hunters | Hunter Days | Harvest |       |     |      |       | Hunt Success |
|---------|----|------|-----------|-------------|--------------------|-----------------------|----------------|-----------|---------|-------------|---------|-------|-----|------|-------|--------------|
|         |    |      |           |             |                    |                       |                |           |         |             | Bull    | Spike | Cow | Calf | Total |              |
| GENERAL |    |      |           |             |                    |                       |                |           |         |             |         |       |     |      |       |              |
| 1       |    | 2004 | BE        | 10/01-10/06 | 40                 | 6948                  | 40             | 0.6       | 40      | 108         | 33      | 0     | 0   | 0    | 33    | 83           |
| 1       |    | 2005 | BE        | 9/30-10/05  | 40                 | 6016                  | 40             | 0.6       | 40      | 125         | 38      | 0     | 0   | 0    | 38    | 95           |
| 1       | CH | 2008 | ALS       | 10/10-10/16 | 10                 | 38                    | 10             | 26.3      | 10      | 37          | 0       | 0     | 10  | 0    | 10    | 100          |
| 1       | ES | 2004 | ALS       | 12/17-12/23 | 75                 | 68                    | 75             | 26.5      | 69      | 247         | 0       | 0     | 34  | 4    | 38    | 55           |
| 1       | ES | 2005 | ALS       | 12/16-12/22 | 75                 | 61                    | 75             | 55.7      | 73      | 266         | 0       | 0     | 21  | 2    | 23    | 32           |
| 1       | ES | 2006 | ALS       | 12/15-12/21 | 65                 | 50                    | 65             | 36.0      | 63      | 233         | 0       | 0     | 25  | 0    | 25    | 40           |
| 1       | ES | 2007 | ALS       | 12/14-12/20 | 50                 | 86                    | 50             | 39.5      | 46      | 137         | 0       | 0     | 20  | 0    | 20    | 43           |
| 1       | ES | 2008 | ALS       | 12/12-12/18 | 50                 | 49                    | 50             | 61.2      | 46      | 189         | 0       | 0     | 13  | 0    | 13    | 28           |
| 1       | RV | 2004 | ALS       | 12/10-12/14 | 30                 | 5                     | 30             | 100.0     | 26      | 81          | 0       | 0     | 0   | 0    | 0     | 0            |
| 1       | RV | 2004 | ALS       | 12/24-12/28 | 30                 | 6                     | 30             | 100.0     | 27      | 87          | 0       | 0     | 3   | 0    | 3     | 11           |
| 1       | RV | 2005 | ALS       | 12/09-12/13 | 30                 | 15                    | 30             | 86.7      | 30      | 118         | 0       | 0     | 3   | 0    | 3     | 10           |
| 1       | RV | 2005 | ALS       | 12/23-12/27 | 30                 | 4                     | 30             | 100.0     | 28      | 100         | 0       | 0     | 3   | 0    | 3     | 11           |
| 1       | RV | 2006 | ALS       | 12/08-12/12 | 30                 | 6                     | 28             | 100.0     | 25      | 89          | 0       | 0     | 8   | 0    | 8     | 32           |
| 1       | RV | 2006 | ALS       | 12/22-12/26 | 30                 | 5                     | 30             | 100.0     | 24      | 75          | 0       | 0     | 0   | 0    | 0     | 0            |
| 1       | RV | 2007 | ALS       | 12/07-12/11 | 30                 | 21                    | 30             | 66.7      | 30      | 98          | 0       | 0     | 11  | 0    | 11    | 37           |
| 1       | RV | 2008 | ALS       | 12/19-12/25 | 40                 | 11                    | 40             | 100.0     | 34      | 74          | 0       | 0     | 19  | 0    | 19    | 56           |
| 1/2B/2C |    | 2007 | BE        | 9/28-10/04  | 40                 | 5484                  | 41             | 0.7       | 41      | 118         | 36      | 0     | 0   | 0    | 36    | 88           |
| 1/2B/2C |    | 2004 | B         | 11/19-11/25 | 360                | 3615                  | 366            | 6.8       | 366     | 1482        | 174     | 52    | 0   | 0    | 226   | 62           |
| 1/2B/2C |    | 2005 | B         | 11/18-11/24 | 425                | 3318                  | 425            | 7.6       | 412     | 1702        | 173     | 39    | 0   | 0    | 212   | 51           |
| 1/2B/2C |    | 2006 | B         | 11/24-11/30 | 425                | 4952                  | 425            | 5.5       | 412     | 1809        | 147     | 59    | 0   | 0    | 206   | 50           |
| 1/2B/2C |    | 2007 | B         | 11/23-11/29 | 425                | 3395                  | 425            | 7.7       | 415     | 1807        | 179     | 62    | 0   | 0    | 241   | 58           |
| 1/2B/2C |    | 2008 | B         | 11/28-12/04 | 425                | 3010                  | 425            | 9.5       | 414     | 1853        | 167     | 58    | 0   | 0    | 225   | 54           |
| 1/2B/2C |    | 2004 | ALS       | 12/17-12/23 | 450                | 1757                  | 450            | 16.7      | 434     | 1455        | 0       | 0     | 246 | 21   | 267   | 62           |
| 1/2B/2C |    | 2005 | ALS       | 12/16-12/22 | 420                | 1249                  | 420            | 21.3      | 395     | 1446        | 0       | 0     | 204 | 19   | 223   | 56           |
| 1/2B/2C |    | 2006 | ALS       | 12/15-12/21 | 105                | 820                   | 105            | 7.3       | 101     | 271         | 0       | 0     | 64  | 4    | 68    | 67           |
| 1/2B/2C |    | 2007 | ALS       | 12/14-12/20 | 70                 | 357                   | 70             | 9.8       | 67      | 127         | 0       | 0     | 49  | 7    | 56    | 84           |
| 1/2B/2C |    | 2008 | ALS       | 12/12-12/18 | 150                | 480                   | 150            | 19.8      | 148     | 405         | 0       | 0     | 79  | 10   | 89    | 60           |
| 1E      |    | 2005 | ALS       | 12/02-12/08 | 225                | 126                   | 225            | 61.9      | 216     | 770         | 0       | 0     | 77  | 9    | 86    | 40           |
| 1E      |    | 2006 | ALS       | 12/01-12/07 | 65                 | 158                   | 65             | 11.4      | 63      | 217         | 0       | 0     | 30  | 2    | 32    | 51           |
| 1E      |    | 2007 | ALS       | 11/30-12/06 | 50                 | 85                    | 50             | 36.5      | 49      | 199         | 0       | 0     | 17  | 0    | 17    | 35           |
| 1E      |    | 2008 | ALS       | 12/05-12/11 | 50                 | 75                    | 50             | 36.0      | 48      | 176         | 0       | 0     | 21  | 3    | 24    | 50           |
| 2A/2B   |    | 2008 | ALSS      | 12/05-12/14 | 30                 | 0                     | 30             | —         | 22      | 70          | 0       | 0     | 3   | 0    | 3     | 14           |
| 2A/2B   |    | 2008 | ALS       | 9/12-9/21   | 40                 | 12                    | 40             | 100.0     | 35      | 190         | 0       | 0     | 5   | 0    | 5     | 14           |
| 2A/2B   |    | 2008 | ALS       | 10/03-10/12 | 40                 | 1                     | 40             | 100.0     | 40      | 218         | 0       | 0     | 8   | 0    | 8     | 20           |
| 2A/2B   |    | 2008 | ALS       | 10/17-10/26 | 30                 | 3                     | 30             | 100.0     | 30      | 135         | 0       | 0     | 2   | 2    | 4     | 13           |
| 2A/2B   |    | 2008 | AE        | 9/12-9/21   | 20                 | 69                    | 20             | 24.6      | 20      | 82          | 5       | 2     | 0   | 0    | 7     | 35           |
| 2A/2B   |    | 2008 | AE        | 10/03-10/12 | 20                 | 37                    | 20             | 16.2      | 20      | 104         | 10      | 2     | 4   | 0    | 16    | 80           |
| 2A/2B   |    | 2008 | AE        | 10/17-10/26 | 15                 | 5                     | 15             | 40.0      | 15      | 75          | 0       | 0     | 4   | 0    | 4     | 27           |
| 2A/2B   |    | 2008 | AE        | 12/05-12/14 | 15                 | 4                     | 15             | 50.0      | 15      | 69          | 2       | 2     | 2   | 0    | 6     | 40           |
| 2B      |    | 2004 | ALS       | 9/10-9/19   | 25                 | 14                    | 25             | 78.6      | 25      | 128         | 0       | 0     | 13  | 0    | 13    | 52           |
| 2B      |    | 2004 | ALS       | 10/01-10/10 | 25                 | 8                     | 25             | 100.0     | 21      | 81          | 0       | 0     | 6   | 0    | 6     | 29           |
| 2B      |    | 2004 | ALS       | 10/15-10/24 | 25                 | 9                     | 25             | 100.0     | 23      | 130         | 0       | 0     | 3   | 0    | 3     | 13           |
| 2B      |    | 2005 | ALS       | 9/09-9/18   | 40                 | 18                    | 40             | 94.4      | 32      | 144         | 0       | 0     | 5   | 0    | 5     | 16           |
| 2B      |    | 2005 | ALS       | 9/30-10/09  | 35                 | 2                     | 35             | 100.0     | 32      | 172         | 0       | 0     | 3   | 0    | 3     | 9            |
| 2B      |    | 2005 | ALS       | 10/14-10/23 | 25                 | 2                     | 25             | 100.0     | 23      | 111         | 0       | 0     | 2   | 0    | 2     | 9            |
| 2B      |    | 2005 | ALS       | 12/02-12/11 | 20                 | 5                     | 20             | 40.0      | 18      | 80          | 0       | 0     | 3   | 5    | 8     | 44           |
| 2B      |    | 2006 | ALS       | 9/15-9/24   | 40                 | 9                     | 40             | 77.8      | 38      | 205         | 0       | 0     | 5   | 2    | 7     | 18           |
| 2B      |    | 2006 | ALS       | 10/06-10/12 | 35                 | 2                     | 34             | 100.0     | 32      | 138         | 0       | 0     | 2   | 0    | 2     | 6            |
| 2B      |    | 2006 | ALS       | 10/20-10/29 | 25                 | 7                     | 25             | 100.0     | 25      | 148         | 0       | 0     | 0   | 0    | 0     | 0            |
| 2B      |    | 2006 | ALS       | 12/08-12/17 | 20                 | 0                     | 20             | —         | 18      | 104         | 0       | 0     | 0   | 0    | 0     | 0            |
| 2B      |    | 2007 | ALS       | 8/24-9/06   | 25                 | 4                     | 25             | 100.0     | 21      | 135         | 0       | 0     | 2   | 0    | 2     | 10           |
| 2B      |    | 2007 | ALS       | 10/05-10/14 | 25                 | 6                     | 25             | 100.0     | 23      | 94          | 0       | 0     | 6   | 0    | 6     | 26           |
| 2B      |    | 2007 | ALS       | 10/19-10/28 | 20                 | 3                     | 20             | 100.0     | 19      | 73          | 0       | 0     | 7   | 3    | 10    | 53           |
| 2B      |    | 2007 | ALS       | 12/07-12/16 | 20                 | 6                     | 19             | 100.0     | 18      | 99          | 0       | 0     | 3   | 0    | 3     | 17           |
| 2B      |    | 2004 | AE        | 9/10-9/19   | 10                 | 126                   | 10             | 5.6       | 10      | 26          | 6       | 0     | 0   | 0    | 6     | 60           |
| 2B      |    | 2004 | AE        | 10/01-10/10 | 10                 | 23                    | 10             | 4.3       | 10      | 37          | 7       | 0     | 0   | 0    | 7     | 70           |
| 2B      |    | 2004 | AE        | 10/15-10/24 | 10                 | 14                    | 10             | 42.9      | 9       | 37          | 3       | 0     | 0   | 0    | 3     | 33           |
| 2B      |    | 2005 | AE        | 9/09-9/18   | 20                 | 78                    | 20             | 15.4      | 20      | 97          | 4       | 0     | 0   | 0    | 4     | 20           |
| 2B      |    | 2005 | AE        | 9/30-10/09  | 15                 | 19                    | 15             | 26.3      | 15      | 33          | 8       | 0     | 0   | 0    | 8     | 53           |
| 2B      |    | 2005 | AE        | 10/14-10/23 | 15                 | 28                    | 15             | 35.7      | 11      | 38          | 5       | 0     | 0   | 0    | 5     | 45           |
| 2B      |    | 2005 | AE        | 12/02-12/11 | 10                 | 13                    | 10             | 7.7       | 9       | 36          | 1       | 0     | 0   | 0    | 1     | 11           |

BE = Early Bull    B = Bull    ALS = Antlerless    AE = Any Elk    CN = Camp Navajo    CH = CHAMP Hunt    DV = Disabled Veteran

### Herd-Units:

CC = Canyon Creek    HM = Hutch Mtn.    MM = Melatone Mesa    SM = East Sunset/West Sunset/Meteor Crater    WI = Winslow  
ES (Unit 1) = Escudilla    M = Martinez    MZ = Mazatzal    TT = Twin Arrows/Two Guns/Grapevine    WS (17/20A/20C) = Williamson  
GV = Grapevine    ML = Marshall Lake    RV = Round Valley    VV = Verde Valley    Valley/Skull Valley/Kirkland Junction

# Elk Hunt Data

## 5-Year: 2004-2008 Harvest

| Unit                       | Year | Hunt Type | Dates       | Permits Authorized | 1st Choice Applicants | Permits Issued | Draw Odds | Hunters | Hunter Days | Harvest |       |     |      |       | Hunt Success |    |
|----------------------------|------|-----------|-------------|--------------------|-----------------------|----------------|-----------|---------|-------------|---------|-------|-----|------|-------|--------------|----|
|                            |      |           |             |                    |                       |                |           |         |             | Bull    | Spike | Cow | Calf | Total |              |    |
| <b>GENERAL (continued)</b> |      |           |             |                    |                       |                |           |         |             |         |       |     |      |       |              |    |
| 2B                         | 2006 | AE        | -9/24       | 20                 | 147                   | 20             | 10.2      | 20      | 108         | 10      | 0     | 0   | 0    | 10    | 50           |    |
| 2B                         | 2006 | AE        | 10/06-10/15 | 15                 | 31                    | 15             | 12.9      | 15      | 78          | 4       | 0     | 0   | 1    | 5     | 33           |    |
| 2B                         | 2006 | AE        | 10/20-10/29 | 15                 | 15                    | 15             | 33.3      | 14      | 87          | 2       | 0     | 0   | 0    | 2     | 14           |    |
| 2B                         | 2006 | AE        | 12/08-12/17 | 10                 | 12                    | 10             | 50.0      | 10      | 25          | 0       | 0     | 0   | 0    | 0     | 0            |    |
| 2B                         | 2007 | AE        | 8/24-9/06   | 10                 | 41                    | 9              | 17.1      | 9       | 41          | 4       | 4     | 0   | 0    | 8     | 89           |    |
| 2B                         | 2007 | AE        | 10/05-10/14 | 10                 | 37                    | 10             | 18.9      | 10      | 45          | 8       | 0     | 0   | 0    | 8     | 80           |    |
| 2B                         | 2007 | AE        | 10/19-10/28 | 10                 | 11                    | 10             | 18.2      | 8       | 46          | 4       | 0     | 0   | 0    | 4     | 50           |    |
| 2B                         | 2007 | AE        | 12/07-12/16 | 10                 | 26                    | 9              | 15.4      | 9       | 45          | 0       | 0     | 2   | 0    | 2     | 22           |    |
| 3A/3C                      | 2004 | BE        | 10/01-10/06 | 20                 | 2184                  | 22             | 0.9       | 22      | 58          | 19      | 0     | 0   | 0    | 19    | 86           |    |
| 3A/3C                      | 2005 | BE        | 9/30-10/05  | 25                 | 2272                  | 25             | 1.1       | 25      | 96          | 19      | 0     | 0   | 0    | 19    | 76           |    |
| 3A/3C                      | 2006 | BE        | 10/06-10/12 | 25                 | 2634                  | 25             | 0.8       | 25      | 108         | 13      | 0     | 0   | 0    | 13    | 52           |    |
| 3A/3C                      | 2008 | BE        | 9/26-10/02  | 30                 | 2552                  | 30             | 1.1       | 30      | 103         | 29      | 0     | 0   | 0    | 29    | 97           |    |
| 3A/3C                      | 2004 | B         | 11/19-11/25 | 150                | 634                   | 154            | 10.9      | 150     | 620         | 52      | 11    | 0   | 0    | 63    | 42           |    |
| 3A/3C                      | 2005 | B         | 11/18-11/24 | 175                | 572                   | 175            | 14.2      | 171     | 811         | 51      | 14    | 0   | 0    | 65    | 38           |    |
| 3A/3C                      | 2006 | B         | 11/24-11/30 | 190                | 582                   | 187            | 12.9      | 185     | 817         | 65      | 15    | 0   | 0    | 80    | 43           |    |
| 3A/3C                      | 2007 | B         | 11/23-11/29 | 190                | 907                   | 190            | 13.0      | 175     | 698         | 55      | 19    | 0   | 0    | 74    | 42           |    |
| 3A/3C                      | 2008 | B         | 11/28-12/04 | 250                | 463                   | 250            | 24.8      | 243     | 1187        | 72      | 11    | 0   | 0    | 83    | 34           |    |
| 3A/3C                      | 2005 | ALS       | 10/14-10/19 | 380                | 712                   | 380            | 32.0      | 373     | 1438        | 0       | 0     | 135 | 11   | 146   | 39           |    |
| 3A/3C                      | 2006 | ALS       | 10/13-10/18 | 265                | 651                   | 265            | 24.4      | 250     | 883         | 0       | 0     | 106 | 17   | 123   | 49           |    |
| 3A/3C                      | 2006 | ALS       | 12/08-12/14 | 250                | 127                   | 250            | 72.4      | 233     | 894         | 0       | 0     | 109 | 2    | 111   | 48           |    |
| 3A/3C                      | 2007 | ALS       | 10/12-10/17 | 265                | 791                   | 264            | 22.9      | 258     | 866         | 0       | 0     | 128 | 18   | 146   | 57           |    |
| 3A/3C                      | 2007 | ALS       | 12/07-12/13 | 250                | 258                   | 250            | 55.4      | 250     | 958         | 0       | 0     | 90  | 7    | 97    | 39           |    |
| 3A/3C                      | 2008 | ALS       | 12/12-12/18 | 250                | 271                   | 250            | 54.6      | 234     | 901         | 0       | 0     | 95  | 14   | 109   | 47           |    |
| 3A/3CE                     | 2004 | ALS       | 10/22-10/27 | 250                | 477                   | 250            | 30.8      | 238     | 1013        | 0       | 0     | 93  | 13   | 106   | 45           |    |
| 3A/3CE                     | 2005 | ALS       | 10/21-10/26 | 300                | 85                    | 300            | 80.0      | 288     | 1144        | 0       | 0     | 84  | 14   | 98    | 34           |    |
| 3A/3CE                     | 2006 | ALS       | 10/20-10/26 | 300                | 304                   | 300            | 55.3      | 289     | 1180        | 0       | 0     | 102 | 17   | 119   | 41           |    |
| 3A/3CE                     | 2007 | ALS       | 10/19-10/25 | 300                | 196                   | 300            | 57.1      | 280     | 1047        | 0       | 0     | 129 | 20   | 149   | 53           |    |
| 3A/3CE                     | 2008 | ALS       | 10/24-10/30 | 300                | 547                   | 300            | 40.6      | 288     | 1202        | 0       | 0     | 107 | 12   | 119   | 41           |    |
| 3AE                        | 2004 | ALS       | 10/01-12/31 | 5                  | 12                    | 5              | 41.7      | 5       | 25          | 0       | 0     | 0   | 0    | 0     | 0            |    |
| 3AE                        | 2005 | ALS       | 8/12-8/25   | 5                  | 4                     | 5              | 25.0      | 0       | 0           | 0       | 0     | 0   | 0    | 0     | -            |    |
| 3AE                        | 2004 | AE        | 10/01-12/31 | 5                  | 56                    | 5              | 7.1       | 5       | 33          | 2       | 2     | 0   | 0    | 4     | 80           |    |
| 3AE                        | 2005 | AE        | 8/12-8/25   | 5                  | 43                    | 5              | 11.6      | 5       | 30          | 0       | 0     | 0   | 0    | 0     | 0            |    |
| 3AW/4BN                    | 2004 | ALS       | 10/08-10/21 | 75                 | 69                    | 75             | 59.4      | 75      | 371         | 0       | 0     | 24  | 5    | 29    | 39           |    |
| 3AW/4BN                    | 2005 | ALS       | 10/07-10/20 | 75                 | 63                    | 75             | 58.7      | 72      | 345         | 0       | 0     | 24  | 0    | 24    | 33           |    |
| 3AW/4BN                    | 2006 | ALS       | 10/13-10/26 | 75                 | 35                    | 75             | 82.9      | 73      | 395         | 0       | 0     | 11  | 4    | 15    | 21           |    |
| 3AW/4BN                    | 2007 | ALS       | 10/12-10/25 | 75                 | 37                    | 75             | 81.1      | 68      | 283         | 0       | 0     | 38  | 13   | 51    | 75           |    |
| 3AW/4BN                    | 2008 | ALS       | 10/03-10/16 | 75                 | 41                    | 75             | 100.0     | 70      | 342         | 0       | 0     | 18  | 7    | 25    | 36           |    |
| 3B                         | 2005 | BE        | 9/30-10/05  | 30                 | 618                   | 30             | 1.5       | 27      | 90          | 23      | 0     | 0   | 0    | 23    | 85           |    |
| 3B                         | 2006 | BE        | 10/06-10/12 | 20                 | 827                   | 20             | 1.6       | 18      | 80          | 17      | 2     | 0   | 0    | 19    | 106          |    |
| 3B                         | 2004 | B         | 11/19-11/25 | 100                | 511                   | 100            | 11.2      | 100     | 443         | 23      | 5     | 0   | 0    | 28    | 28           |    |
| 3B                         | 2005 | B         | 11/18-11/24 | 100                | 290                   | 100            | 16.2      | 88      | 385         | 28      | 3     | 0   | 0    | 31    | 35           |    |
| 3B                         | 2006 | B         | 11/24-11/30 | 150                | 391                   | 150            | 16.6      | 146     | 744         | 21      | 15    | 0   | 0    | 36    | 25           |    |
| 3B                         | 2007 | B         | 11/23-11/29 | 150                | 430                   | 150            | 17.0      | 145     | 694         | 28      | 16    | 0   | 0    | 44    | 30           |    |
| 3B                         | 2004 | ALS       | 12/03-12/09 | 70                 | 158                   | 70             | 22.8      | 64      | 250         | 0       | 0     | 23  | 9    | 32    | 50           |    |
| 3B                         | 2004 | ALS       | 12/17-12/23 | 225                | 279                   | 225            | 37.3      | 217     | 821         | 0       | 0     | 63  | 6    | 69    | 32           |    |
| 3B                         | 2005 | ALS       | 12/02-12/08 | 70                 | 117                   | 70             | 21.4      | 66      | 249         | 0       | 0     | 16  | 0    | 16    | 24           |    |
| 3B                         | 2005 | ALS       | 12/16-12/22 | 225                | 221                   | 225            | 47.5      | 214     | 931         | 0       | 0     | 43  | 13   | 56    | 26           |    |
| 3B                         | 2006 | ALS       | 12/08-12/14 | 50                 | 89                    | 50             | 41.6      | 47      | 162         | 0       | 0     | 19  | 2    | 21    | 45           |    |
| 3B                         | 2006 | ALS       | 12/15-12/31 | 150                | 227                   | 150            | 39.2      | 147     | 735         | 0       | 0     | 66  | 7    | 73    | 50           |    |
| 3B                         | 2007 | ALS       | 12/07-12/13 | 50                 | 99                    | 50             | 25.3      | 46      | 161         | 0       | 0     | 13  | 2    | 15    | 33           |    |
| 3B                         | 2007 | ALS       | 12/14-12/30 | 150                | 203                   | 150            | 48.8      | 142     | 793         | 0       | 0     | 43  | 4    | 47    | 33           |    |
| 3B                         | CH   | 2004      | ALS         | 10/22-10/27        | 10                    | 24             | 10        | 37.5    | 9           | 34      | 0     | 0   | 6    | 0     | 6            | 67 |
| 3B                         | CH   | 2005      | ALS         | 10/07-10/13        | 10                    | 29             | 10        | 31.0    | 8           | 29      | 0     | 0   | 4    | 0     | 4            | 50 |
| 3B                         | CH   | 2006      | ALS         | 10/13-10/19        | 10                    | 29             | 10        | 31.0    | 10          | 38      | 0     | 0   | 8    | 0     | 8            | 80 |
| 3B                         | CH   | 2007      | ALS         | 10/12-10/18        | 10                    | 30             | 9         | 26.7    | 8           | 39      | 0     | 0   | 5    | 0     | 5            | 63 |
| 3CW                        | 2004 | ALS       | 10/22-10/27 | 150                | 352                   | 150            | 26.7      | 145     | 482         | 0       | 0     | 63  | 2    | 65    | 45           |    |
| 3CW                        | 2005 | ALS       | 10/21-10/26 | 150                | 135                   | 150            | 65.9      | 146     | 606         | 0       | 0     | 43  | 6    | 49    | 34           |    |
| 3CW                        | 2006 | ALS       | 10/20-10/26 | 150                | 158                   | 150            | 60.1      | 148     | 533         | 0       | 0     | 57  | 10   | 67    | 45           |    |
| 3CW                        | 2007 | ALS       | 10/19-10/25 | 150                | 180                   | 150            | 43.9      | 140     | 550         | 0       | 0     | 60  | 6    | 66    | 47           |    |
| 3CW                        | 2008 | ALS       | 10/24-10/30 | 150                | 301                   | 150            | 36.5      | 141     | 524         | 0       | 0     | 68  | 4    | 72    | 51           |    |
| 4A                         | 2004 | BE        | 10/01-10/06 | 10                 | 1482                  | 13             | 0.7       | 12      | 40          | 10      | 0     | 0   | 0    | 10    | 83           |    |
| 4A                         | 2006 | BE        | 10/06-10/12 | 15                 | 896                   | 15             | 1.0       | 15      | 45          | 13      | 0     | 0   | 0    | 13    | 87           |    |
| 4A                         | 2007 | BE        | 9/28-10/04  | 15                 | 658                   | 15             | 1.5       | 14      | 32          | 13      | 0     | 0   | 0    | 13    | 93           |    |
| 4A                         | 2004 | B         | 11/19-11/25 | 205                | 1096                  | 205            | 11.8      | 199     | 918         | 35      | 6     | 0   | 0    | 41    | 21           |    |
| 4A                         | 2005 | B         | 11/18-11/24 | 250                | 948                   | 250            | 14.5      | 242     | 1061        | 25      | 15    | 0   | 0    | 40    | 17           |    |
| 4A                         | 2006 | B         | 11/24-11/30 | 250                | 820                   | 250            | 18.4      | 248     | 1174        | 39      | 26    | 0   | 0    | 65    | 26           |    |
| 4A                         | 2007 | B         | 11/23-11/29 | 250                | 765                   | 250            | 22.0      | 246     | 1145        | 54      | 2     | 0   | 0    | 56    | 23           |    |

BE = Early Bull B = Bull ALS = Antlerless AE = Any Elk CN = Camp Navajo CH = CHAMP Hunt DV = Disabled Veteran



# Elk Hunt Data

## 5-Year: 2004-2008 Harvest

| Unit                       |    | Year | Hunt Type | Dates       | Permits Authorized | 1st Choice Applicants | Permits Issued | Draw Odds | Hunters | Hunter Days | Harvest |       |     |      |       | Hunt Success |
|----------------------------|----|------|-----------|-------------|--------------------|-----------------------|----------------|-----------|---------|-------------|---------|-------|-----|------|-------|--------------|
|                            |    |      |           |             |                    |                       |                |           |         |             | Bull    | Spike | Cow | Calf | Total |              |
| <b>GENERAL (continued)</b> |    |      |           |             |                    |                       |                |           |         |             |         |       |     |      |       |              |
| 4A                         |    | 2008 | B         | 11/28-12/04 | 395                | 785                   | 395            | 30.3      | 373     | 1755        | 77      | 14    | 0   | 0    | 91    | 24           |
| 4A                         |    | 2004 | ALS       | 11/12-11/15 | 300                | 861                   | 300            | 22.1      | 284     | 809         | 0       | 0     | 107 | 12   | 119   | 42           |
| 4A                         |    | 2005 | ALS       | 11/11-11/14 | 250                | 631                   | 250            | 30.1      | 241     | 714         | 0       | 0     | 72  | 9    | 81    | 34           |
| 4A                         |    | 2006 | ALS       | 10/27-11/02 | 170                | 484                   | 170            | 22.1      | 158     | 556         | 0       | 0     | 69  | 4    | 73    | 46           |
| 4A                         |    | 2007 | ALS       | 10/26-11/01 | 100                | 347                   | 100            | 22.2      | 98      | 372         | 0       | 0     | 33  | 5    | 38    | 39           |
| 4A                         |    | 2008 | ALS       | 10/24-10/30 | 100                | 298                   | 100            | 28.9      | 96      | 320         | 0       | 0     | 39  | 6    | 45    | 47           |
| 4B                         |    | 2005 | BE        | 9/30-10/05  | 40                 | 1222                  | 40             | 2.0       | 40      | 182         | 22      | 2     | 0   | 0    | 24    | 60           |
| 4B                         |    | 2007 | BE        | 9/28-10/04  | 25                 | 585                   | 25             | 2.4       | 25      | 107         | 16      | 0     | 0   | 0    | 16    | 64           |
| 4B                         |    | 2008 | BE        | 9/26-10/02  | 50                 | 1184                  | 50             | 2.2       | 48      | 214         | 28      | 2     | 0   | 0    | 30    | 63           |
| 4B                         |    | 2004 | B         | 11/19-11/25 | 250                | 958                   | 250            | 15.2      | 241     | 1076        | 56      | 7     | 0   | 0    | 63    | 26           |
| 4B                         |    | 2005 | B         | 11/18-11/24 | 275                | 632                   | 275            | 25.6      | 257     | 1275        | 41      | 6     | 0   | 0    | 47    | 18           |
| 4B                         |    | 2006 | B         | 11/24-11/30 | 300                | 836                   | 300            | 20.0      | 290     | 1325        | 48      | 15    | 0   | 0    | 63    | 22           |
| 4B                         |    | 2007 | B         | 11/23-11/29 | 300                | 750                   | 300            | 23.6      | 296     | 1433        | 49      | 14    | 0   | 0    | 63    | 21           |
| 4B                         |    | 2008 | B         | 11/28-12/04 | 400                | 588                   | 400            | 37.6      | 379     | 1808        | 71      | 18    | 0   | 0    | 89    | 23           |
| 4B                         |    | 2008 | ALS       | 12/05-12/11 | 200                | 63                    | 200            | 100.0     | 189     | 840         | 0       | 0     | 29  | 6    | 35    | 19           |
| 4BN                        |    | 2007 | ALS       | 8/01-9/13   | 15                 | 9                     | 15             | 77.8      | 13      | 90          | 0       | 0     | 0   | 0    | 0     | 0            |
| 4BN                        |    | 2007 | ALS       | 10/12-11/01 | 15                 | 1                     | 15             | 100.0     | 15      | 95          | 0       | 0     | 5   | 0    | 5     | 33           |
| 4BN                        |    | 2007 | ALS       | 11/02-11/22 | 10                 | 3                     | 10             | 100.0     | 10      | 37          | 0       | 0     | 3   | 0    | 3     | 30           |
| 4BN                        |    | 2007 | ALS       | 11/30-12/31 | 5                  | 0                     | 5              | -         | 5       | 13          | 0       | 0     | 1   | 0    | 1     | 20           |
| 4BN                        |    | 2007 | AE        | 8/01-9/13   | 5                  | 76                    | 5              | 3.9       | 5       | 67          | 5       | 0     | 0   | 0    | 5     | 100          |
| 4BN                        |    | 2007 | AE        | 11/30-12/31 | 5                  | 23                    | 5              | 0.0       | 3       | 3           | 0       | 0     | 3   | 0    | 3     | 100          |
| 5A                         |    | 2006 | BE        | 10/06-10/12 | 25                 | 1253                  | 25             | 1.7       | 25      | 100         | 23      | 0     | 0   | 0    | 23    | 92           |
| 5A                         |    | 2004 | B         | 11/19-11/25 | 150                | 1309                  | 150            | 9.8       | 142     | 588         | 59      | 2     | 0   | 0    | 61    | 43           |
| 5A                         |    | 2005 | B         | 11/18-11/24 | 115                | 990                   | 115            | 10.3      | 111     | 532         | 37      | 7     | 0   | 0    | 44    | 40           |
| 5A                         |    | 2006 | B         | 11/24-11/30 | 145                | 771                   | 145            | 11.8      | 143     | 644         | 58      | 13    | 0   | 0    | 71    | 50           |
| 5A                         |    | 2007 | B         | 11/23-11/29 | 165                | 861                   | 165            | 13.9      | 161     | 707         | 54      | 19    | 0   | 0    | 73    | 45           |
| 5A                         |    | 2008 | B         | 11/28-12/04 | 240                | 761                   | 240            | 23.0      | 234     | 1136        | 73      | 6     | 0   | 0    | 79    | 34           |
| 5A                         |    | 2004 | ALS       | 10/15-10/21 | 300                | 1235                  | 300            | 18.4      | 285     | 1016        | 0       | 0     | 133 | 29   | 162   | 57           |
| 5A                         |    | 2004 | ALS       | 12/03-12/09 | 300                | 363                   | 300            | 41.3      | 280     | 1077        | 0       | 0     | 57  | 10   | 67    | 24           |
| 5A                         |    | 2005 | ALS       | 10/14-10/20 | 250                | 890                   | 250            | 20.8      | 247     | 911         | 0       | 0     | 133 | 13   | 146   | 59           |
| 5A                         |    | 2005 | ALS       | 12/02-12/08 | 200                | 163                   | 200            | 48.5      | 195     | 746         | 0       | 0     | 87  | 4    | 91    | 47           |
| 5A                         |    | 2006 | ALS       | 10/20-10/26 | 350                | 1041                  | 350            | 26.5      | 338     | 1332        | 0       | 0     | 166 | 11   | 177   | 52           |
| 5A                         |    | 2006 | ALS       | 12/01-12/07 | 200                | 319                   | 200            | 30.7      | 189     | 714         | 0       | 0     | 72  | 6    | 78    | 41           |
| 5A                         |    | 2007 | ALS       | 10/19-10/25 | 300                | 763                   | 299            | 27.9      | 292     | 1196        | 0       | 0     | 122 | 14   | 136   | 47           |
| 5A                         |    | 2007 | ALS       | 11/30-12/06 | 200                | 154                   | 200            | 59.7      | 190     | 812         | 0       | 0     | 65  | 10   | 75    | 39           |
| 5A                         |    | 2008 | ALS       | 10/17-10/23 | 325                | 772                   | 325            | 32.6      | 315     | 1226        | 0       | 0     | 146 | 15   | 161   | 51           |
| 5A                         |    | 2008 | ALS       | 12/05-12/11 | 220                | 180                   | 220            | 61.7      | 211     | 940         | 0       | 0     | 52  | 4    | 56    | 27           |
| 5A/5BN                     | SM | 2004 | ALS       | 10/15-10/21 | 50                 | 7                     | 50             | 100.0     | 50      | 192         | 0       | 0     | 5   | 3    | 8     | 16           |
| 5A/5BN                     | SM | 2006 | ALS       | 10/20-10/26 | 75                 | 11                    | 75             | 63.6      | 73      | 284         | 0       | 0     | 5   | 2    | 7     | 10           |
| 5A/5BN                     | SM | 2007 | ALS       | 10/19-10/25 | 75                 | 12                    | 75             | 100.0     | 68      | 284         | 0       | 0     | 19  | 0    | 19    | 28           |
| 5A/5BN                     | SM | 2008 | ALS       | 10/17-10/23 | 75                 | 10                    | 75             | 100.0     | 70      | 230         | 0       | 0     | 21  | 3    | 24    | 34           |
| 5A/5BN                     | SM | 2004 | AE        | 10/15-10/21 | 75                 | 285                   | 75             | 17.9      | 73      | 277         | 20      | 0     | 13  | 0    | 33    | 45           |
| 5A/5BN                     | SM | 2005 | AE        | 10/14-10/20 | 75                 | 249                   | 75             | 22.1      | 75      | 371         | 30      | 2     | 4   | 0    | 36    | 48           |
| 5A/5BN                     | SM | 2006 | AE        | 10/20-10/26 | 75                 | 153                   | 75             | 34.0      | 70      | 305         | 27      | 0     | 0   | 0    | 27    | 39           |
| 5A/5BN                     | SM | 2007 | AE        | 10/19-10/25 | 75                 | 303                   | 75             | 18.8      | 75      | 318         | 35      | 0     | 0   | 0    | 35    | 47           |
| 5A/5BN                     | SM | 2008 | AE        | 10/17-10/23 | 75                 | 114                   | 75             | 38.6      | 67      | 310         | 22      | 2     | 4   | 0    | 28    | 42           |
| 5BN                        |    | 2008 | BE        | 9/26-10/02  | 25                 | 1193                  | 25             | 1.8       | 25      | 76          | 19      | 0     | 0   | 0    | 19    | 76           |
| 5BN                        |    | 2004 | B         | 11/19-11/25 | 450                | 1994                  | 450            | 13.8      | 442     | 1818        | 104     | 14    | 0   | 0    | 118   | 27           |
| 5BN                        |    | 2005 | B         | 11/18-11/24 | 450                | 1896                  | 450            | 13.5      | 435     | 1830        | 138     | 23    | 0   | 0    | 161   | 37           |
| 5BN                        |    | 2006 | B         | 11/24-11/30 | 500                | 2205                  | 500            | 13.9      | 484     | 1962        | 175     | 31    | 0   | 0    | 206   | 43           |
| 5BN                        |    | 2007 | B         | 11/23-11/29 | 425                | 1565                  | 425            | 15.9      | 394     | 1835        | 116     | 25    | 0   | 0    | 141   | 36           |
| 5BN                        |    | 2008 | B         | 11/28-12/04 | 500                | 1375                  | 500            | 19.9      | 476     | 2028        | 206     | 20    | 0   | 0    | 226   | 47           |
| 5BN                        |    | 2004 | ALS       | 12/03-12/09 | 125                | 225                   | 125            | 24.0      | 117     | 367         | 0       | 0     | 55  | 2    | 57    | 49           |
| 5BN                        |    | 2005 | ALS       | 12/02-12/08 | 100                | 144                   | 100            | 33.3      | 98      | 369         | 0       | 0     | 27  | 4    | 31    | 32           |
| 5BN                        |    | 2006 | ALS       | 12/01-12/07 | 125                | 200                   | 125            | 42.0      | 123     | 462         | 0       | 0     | 45  | 11   | 56    | 46           |
| 5BN                        |    | 2007 | ALS       | 11/30-12/06 | 150                | 177                   | 150            | 42.9      | 150     | 626         | 0       | 0     | 34  | 2    | 36    | 24           |
| 5BN                        |    | 2008 | ALS       | 10/17-10/23 | 300                | 518                   | 300            | 31.5      | 281     | 1033        | 0       | 0     | 104 | 14   | 118   | 42           |
| 5BN                        |    | 2008 | ALS       | 12/05-12/11 | 150                | 75                    | 150            | 82.7      | 143     | 540         | 0       | 0     | 39  | 5    | 44    | 31           |
| 5BN                        | ML | 2004 | ALS       | 10/15-10/21 | 200                | 352                   | 200            | 38.9      | 196     | 709         | 0       | 0     | 83  | 11   | 94    | 48           |
| 5BN                        | ML | 2005 | ALS       | 10/14-10/20 | 300                | 406                   | 300            | 43.1      | 290     | 980         | 0       | 0     | 113 | 28   | 141   | 49           |
| 5BN                        | ML | 2006 | ALS       | 10/20-10/26 | 300                | 380                   | 298            | 46.3      | 288     | 1044        | 0       | 0     | 104 | 8    | 112   | 39           |

BE = Early Bull    B = Bull    ALS = Antlerless    AE = Any Elk    CN = Camp Navajo    CH = CHAMP Hunt    DV = Disabled Veteran

### Herd-Units:

CC = Canyon Creek    HM = Hutch Mtn.    MM = Melatone Mesa    SM = East Sunset/West Sunset/Meteor Crater    WI = Winslow  
ES (Unit 1) = Escudilla    M = Martinez    MZ = Mazatzal    TT = Twin Arrows/Two Guns/Grapevine    WS (17/20A/20C) = Williamson  
GV = Grapevine    ML = Marshall Lake    RV = Round Valley    VV = Verde Valley    Valley/Skull Valley/Kirkland Junction

# Elk Hunt Data

## 5-Year: 2004-2008 Harvest

| Unit                       |    | Year | Hunt Type | Dates       | Permits Authorized | 1st Choice Applicants | Permits Issued | Draw Odds | Hunters | Hunter Days | Harvest |       |     |      |       | Hunt Success |
|----------------------------|----|------|-----------|-------------|--------------------|-----------------------|----------------|-----------|---------|-------------|---------|-------|-----|------|-------|--------------|
|                            |    |      |           |             |                    |                       |                |           |         |             | Bull    | Spike | Cow | Calf | Total |              |
| <b>GENERAL (continued)</b> |    |      |           |             |                    |                       |                |           |         |             |         |       |     |      |       |              |
| 5BN                        | ML | 2007 | ALS       | 10/19-10/25 | 300                | 401                   | 299            | 39.9      | 287     | 1163        | 0       | 0     | 124 | 9    | 133   | 46           |
| 5BN                        | TT | 2004 | ALS       | 10/15-10/21 | 140                | 81                    | 140            | 70.4      | 138     | 556         | 0       | 0     | 35  | 0    | 35    | 25           |
| 5BN                        | TT | 2005 | ALS       | 10/14-10/20 | 140                | 67                    | 140            | 100.0     | 135     | 541         | 0       | 0     | 16  | 14   | 30    | 22           |
| 5BN                        | TT | 2006 | ALS       | 10/20-10/26 | 140                | 59                    | 140            | 84.7      | 136     | 524         | 0       | 0     | 28  | 6    | 34    | 25           |
| 5BN                        | TT | 2007 | ALS       | 10/19-10/25 | 100                | 54                    | 100            | 92.6      | 95      | 363         | 0       | 0     | 30  | 2    | 32    | 34           |
| 5BN                        | TT | 2008 | ALS       | 10/17-10/23 | 125                | 43                    | 125            | 100.0     | 113     | 435         | 0       | 0     | 31  | 0    | 31    | 27           |
| 5BN                        | GV | 2004 | AE        | 10/15-10/21 | 15                 | 90                    | 15             | 8.9       | 15      | 42          | 9       | 0     | 0   | 0    | 9     | 60           |
| 5BN                        | GV | 2005 | AE        | 10/14-10/20 | 20                 | 83                    | 20             | 18.1      | 18      | 88          | 9       | 2     | 0   | 0    | 11    | 61           |
| 5BN                        | TT | 2004 | AE        | 10/15-10/21 | 25                 | 62                    | 25             | 21.0      | 23      | 86          | 9       | 0     | 5   | 0    | 14    | 61           |
| 5BN                        | TT | 2005 | AE        | 10/14-10/20 | 20                 | 66                    | 20             | 21.2      | 20      | 74          | 10      | 0     | 2   | 0    | 12    | 60           |
| 5BN                        | TT | 2006 | AE        | 10/20-10/26 | 70                 | 244                   | 70             | 16.8      | 70      | 298         | 20      | 0     | 6   | 2    | 28    | 40           |
| 5BS                        |    | 2004 | B         | 11/19-11/25 | 200                | 2107                  | 200            | 8.5       | 194     | 684         | 92      | 16    | 0   | 0    | 108   | 56           |
| 5BS                        |    | 2005 | B         | 11/18-11/24 | 175                | 1638                  | 175            | 9.0       | 171     | 660         | 65      | 27    | 0   | 0    | 92    | 54           |
| 5BS                        |    | 2006 | B         | 11/24-11/30 | 255                | 1883                  | 252            | 10.4      | 244     | 935         | 102     | 31    | 0   | 0    | 133   | 55           |
| 5BS                        |    | 2007 | B         | 11/23-11/29 | 350                | 2033                  | 347            | 12.5      | 339     | 1366        | 157     | 33    | 0   | 0    | 190   | 56           |
| 5BS                        |    | 2008 | B         | 11/28-12/04 | 350                | 1627                  | 350            | 16.8      | 343     | 1447        | 143     | 37    | 0   | 0    | 180   | 52           |
| 5BS                        |    | 2004 | ALS       | 12/03-12/09 | 400                | 766                   | 400            | 28.7      | 384     | 1176        | 0       | 0     | 165 | 20   | 185   | 48           |
| 5BS                        |    | 2005 | ALS       | 12/02-12/08 | 475                | 785                   | 475            | 33.2      | 450     | 1549        | 0       | 0     | 234 | 26   | 260   | 58           |
| 5BS                        |    | 2006 | ALS       | 12/01-12/07 | 520                | 933                   | 520            | 33.1      | 504     | 1745        | 0       | 0     | 226 | 12   | 238   | 47           |
| 5BS                        |    | 2007 | ALS       | 10/19-10/25 | 625                | 2100                  | 625            | 21.3      | 609     | 2092        | 0       | 0     | 316 | 29   | 345   | 57           |
| 5BS                        |    | 2007 | ALS       | 11/30-12/06 | 550                | 384                   | 549            | 47.4      | 521     | 1859        | 0       | 0     | 154 | 20   | 174   | 33           |
| 5BS                        |    | 2008 | ALS       | 10/17-10/23 | 625                | 1986                  | 625            | 25.2      | 612     | 2198        | 0       | 0     | 274 | 46   | 320   | 52           |
| 5BS                        |    | 2008 | ALS       | 12/12-12/18 | 420                | 312                   | 420            | 60.3      | 396     | 1162        | 0       | 0     | 170 | 21   | 191   | 48           |
| 5BS                        | HM | 2004 | ALS       | 10/15-10/21 | 325                | 844                   | 325            | 23.9      | 313     | 838         | 0       | 0     | 214 | 22   | 236   | 75           |
| 5BS                        | HM | 2005 | ALS       | 10/14-10/20 | 400                | 1077                  | 400            | 29.2      | 400     | 1210        | 0       | 0     | 212 | 24   | 236   | 59           |
| 5BS                        | HM | 2006 | ALS       | 10/20-10/26 | 430                | 1178                  | 429            | 27.2      | 414     | 1224        | 0       | 0     | 262 | 14   | 276   | 67           |
| 5BS                        | MM | 2004 | ALS       | 10/15-10/21 | 180                | 275                   | 180            | 41.1      | 170     | 505         | 0       | 0     | 67  | 16   | 83    | 49           |
| 5BS                        | MM | 2005 | ALS       | 10/14-10/20 | 180                | 266                   | 180            | 39.1      | 169     | 567         | 0       | 0     | 73  | 7    | 80    | 47           |
| 5BS                        | MM | 2006 | ALS       | 10/20-10/26 | 190                | 206                   | 190            | 47.1      | 185     | 752         | 0       | 0     | 38  | 7    | 45    | 24           |
| 6A                         |    | 2004 | B         | 11/19-11/25 | 815                | 10448                 | 815            | 6.9       | 795     | 3176        | 291     | 48    | 0   | 0    | 339   | 43           |
| 6A                         |    | 2005 | B         | 11/18-11/24 | 750                | 8226                  | 750            | 8.2       | 724     | 2895        | 250     | 65    | 0   | 0    | 315   | 44           |
| 6A                         |    | 2006 | B         | 11/24-11/30 | 860                | 8369                  | 858            | 9.0       | 838     | 3268        | 317     | 134   | 0   | 0    | 451   | 54           |
| 6A                         |    | 2007 | B         | 11/23-11/29 | 860                | 7773                  | 860            | 9.3       | 834     | 3805        | 277     | 104   | 0   | 0    | 381   | 46           |
| 6A                         |    | 2008 | B         | 11/28-12/04 | 950                | 6144                  | 950            | 13.1      | 921     | 4084        | 340     | 59    | 0   | 0    | 399   | 43           |
| 6A                         |    | 2005 | ALS       | 12/02-12/08 | 485                | 1444                  | 485            | 19.8      | 474     | 1671        | 0       | 0     | 217 | 17   | 234   | 49           |
| 6A                         |    | 2006 | ALS       | 12/01-12/07 | 535                | 1498                  | 533            | 18.5      | 522     | 1975        | 0       | 0     | 226 | 23   | 249   | 48           |
| 6A                         |    | 2007 | ALS       | 11/30-12/06 | 700                | 1502                  | 699            | 23.8      | 672     | 2700        | 0       | 0     | 247 | 10   | 257   | 38           |
| 6A                         |    | 2008 | ALS       | 12/05-12/11 | 845                | 1245                  | 845            | 35.1      | 817     | 3127        | 0       | 0     | 299 | 30   | 329   | 40           |
| 6A/19A/21                  | VV | 2004 | ALS       | 10/15-10/21 | 30                 | 7                     | 30             | 100.0     | 30      | 93          | 0       | 0     | 3   | 0    | 3     | 10           |
| 6A/19A/21                  | VV | 2005 | ALS       | 10/14-10/20 | 25                 | 10                    | 25             | 100.0     | 19      | 63          | 0       | 0     | 10  | 0    | 10    | 53           |
| 6A/19A/21                  | VV | 2006 | ALS       | 10/20-10/26 | 25                 | 20                    | 25             | 55.0      | 21      | 73          | 0       | 0     | 6   | 0    | 6     | 29           |
| 6A/19A/21                  | VV | 2007 | ALS       | 10/19-10/25 | 25                 | 17                    | 25             | 76.5      | 21      | 88          | 0       | 0     | 8   | 0    | 8     | 38           |
| 6A/19A/21                  | VV | 2004 | AE        | 11/19-11/25 | 15                 | 28                    | 15             | 28.6      | 15      | 83          | 0       | 0     | 0   | 0    | 0     | 0            |
| 6A/19A/21                  | VV | 2005 | AE        | 11/18-11/24 | 5                  | 24                    | 5              | 8.3       | 5       | 15          | 3       | 0     | 0   | 0    | 3     | 60           |
| 6A/19A/21                  | VV | 2006 | AE        | 11/24-11/30 | 10                 | 64                    | 10             | 9.4       | 10      | 40          | 5       | 0     | 0   | 0    | 5     | 50           |
| 6A/19A/21                  | VV | 2007 | AE        | 11/23-11/29 | 10                 | 50                    | 10             | 14.0      | 10      | 48          | 3       | 0     | 3   | 0    | 6     | 60           |
| 6AN/6AS                    |    | 2004 | ALS       | 12/03-12/09 | 505                | 1520                  | 505            | 18.9      | 479     | 1626        | 0       | 0     | 199 | 17   | 216   | 45           |
| 6AN/6AW                    |    | 2007 | BE        | 9/28-10/04  | 25                 | 2044                  | 25             | 1.0       | 25      | 98          | 20      | 1     | 0   | 0    | 21    | 84           |
| 6AW                        |    | 2004 | ALS       | 10/15-10/21 | 35                 | 180                   | 35             | 13.9      | 35      | 113         | 0       | 0     | 20  | 2    | 22    | 63           |
| 6AW                        |    | 2004 | ALS       | 12/03-12/09 | 75                 | 70                    | 75             | 44.3      | 60      | 215         | 0       | 0     | 20  | 3    | 23    | 38           |
| 6AW                        |    | 2005 | ALS       | 10/14-10/20 | 50                 | 144                   | 50             | 21.5      | 50      | 154         | 0       | 0     | 22  | 0    | 22    | 44           |
| 6AW                        |    | 2006 | ALS       | 10/20-10/26 | 55                 | 176                   | 55             | 18.8      | 55      | 187         | 0       | 0     | 22  | 0    | 22    | 40           |
| 6AW                        |    | 2007 | ALS       | 10/19-10/25 | 75                 | 137                   | 75             | 32.8      | 75      | 277         | 0       | 0     | 32  | 4    | 36    | 48           |
| 6AW                        |    | 2008 | ALS       | 10/17-10/23 | 75                 | 171                   | 75             | 26.9      | 75      | 260         | 0       | 0     | 28  | 7    | 35    | 47           |
| 6B                         |    | 2005 | BE        | 9/30-10/05  | 25                 | 949                   | 25             | 2.2       | 25      | 74          | 24      | 0     | 0   | 0    | 24    | 96           |
| 6B                         |    | 2004 | B         | 11/19-11/25 | 170                | 598                   | 174            | 18.6      | 168     | 653         | 57      | 17    | 0   | 0    | 74    | 44           |
| 6B                         |    | 2005 | B         | 11/18-11/24 | 175                | 552                   | 175            | 15.0      | 169     | 658         | 63      | 12    | 0   | 0    | 75    | 44           |
| 6B                         |    | 2006 | B         | 11/24-11/30 | 190                | 592                   | 190            | 19.8      | 186     | 697         | 76      | 23    | 0   | 0    | 99    | 53           |
| 6B                         |    | 2007 | B         | 11/23-11/29 | 230                | 715                   | 230            | 21.3      | 224     | 924         | 87      | 11    | 0   | 0    | 98    | 44           |
| 6B                         |    | 2008 | B         | 11/28-12/04 | 200                | 531                   | 200            | 24.9      | 195     | 865         | 62      | 19    | 0   | 0    | 81    | 42           |
| 6B                         |    | 2004 | ALS       | 12/03-12/09 | 340                | 392                   | 340            | 48.7      | 319     | 1100        | 0       | 0     | 112 | 17   | 129   | 40           |
| 6B                         |    | 2005 | ALS       | 12/02-12/08 | 400                | 357                   | 400            | 61.1      | 381     | 1609        | 0       | 0     | 76  | 11   | 87    | 23           |
| 6B                         |    | 2006 | ALS       | 12/01-12/07 | 400                | 357                   | 399            | 51.0      | 388     | 1530        | 0       | 0     | 101 | 12   | 113   | 29           |
| 6B                         |    | 2007 | ALS       | 11/30-12/06 | 450                | 261                   | 448            | 76.2      | 417     | 1809        | 0       | 0     | 97  | 14   | 111   | 27           |
| 6B                         |    | 2008 | ALS       | 12/05-12/11 | 450                | 308                   | 450            | 80.8      | 423     | 1922        | 0       | 0     | 80  | 8    | 88    | 21           |
| 7E                         |    | 2004 | B         | 11/19-11/25 | 380                | 1025                  | 380            | 23.7      | 373     | 1622        | 121     | 36    | 0   | 0    | 157   | 42           |
| 7E                         |    | 2005 | B         | 11/18-11/24 | 460                | 1307                  | 460            | 20.8      | 450     | 2093        | 81      | 29    | 0   | 0    | 110   | 24           |

BE = Early Bull    B = Bull    ALS = Antlerless    AE = Any Elk    CN = Camp Navajo    CH = CHAMP Hunt    DV = Disabled Veteran

# Elk Hunt Data

## 5-Year: 2004-2008 Harvest

| Unit                       | Year | Hunt Type | Dates       | Permits Authorized | 1st Choice Applicants | Permits Issued | Draw Odds | Hunters | Hunter Days | Harvest |       |     |      |       | Hunt Success |
|----------------------------|------|-----------|-------------|--------------------|-----------------------|----------------|-----------|---------|-------------|---------|-------|-----|------|-------|--------------|
|                            |      |           |             |                    |                       |                |           |         |             | Bull    | Spike | Cow | Calf | Total |              |
| <b>GENERAL (continued)</b> |      |           |             |                    |                       |                |           |         |             |         |       |     |      |       |              |
| 7E                         | 2006 | B         | 11/24-11/30 | 375                | 777                   | 373            | 26.9      | 371     | 1620        | 113     | 27    | 0   | 0    | 140   | 38           |
| 7E                         | 2007 | B         | 11/23-11/29 | 400                | 1037                  | 400            | 27.2      | 398     | 1789        | 100     | 37    | 0   | 0    | 137   | 34           |
| 7E                         | 2008 | B         | 11/28-12/04 | 425                | 764                   | 425            | 36.6      | 418     | 1810        | 136     | 28    | 0   | 0    | 164   | 39           |
| 7E                         | 2004 | ALS       | 10/15-10/21 | 340                | 386                   | 340            | 45.1      | 334     | 1358        | 0       | 0     | 75  | 17   | 92    | 28           |
| 7E                         | 2005 | ALS       | 10/14-10/20 | 325                | 381                   | 325            | 51.2      | 319     | 1331        | 0       | 0     | 75  | 10   | 85    | 27           |
| 7E                         | 2006 | ALS       | 10/20-10/26 | 220                | 225                   | 219            | 52.9      | 214     | 752         | 0       | 0     | 107 | 8    | 115   | 54           |
| 7E                         | 2007 | ALS       | 10/19-10/25 | 325                | 373                   | 325            | 52.5      | 313     | 1224        | 0       | 0     | 104 | 14   | 118   | 38           |
| 7E                         | 2008 | ALS       | 10/17-10/23 | 325                | 304                   | 325            | 60.2      | 305     | 1263        | 0       | 0     | 109 | 6    | 115   | 38           |
| 7W                         | 2004 | B         | 11/19-11/25 | 475                | 2241                  | 475            | 13.0      | 459     | 2008        | 110     | 48    | 0   | 0    | 158   | 34           |
| 7W                         | 2005 | B         | 11/18-11/24 | 400                | 1539                  | 400            | 19.0      | 390     | 1862        | 86      | 50    | 0   | 0    | 136   | 35           |
| 7W                         | 2006 | B         | 11/24-11/30 | 400                | 1780                  | 400            | 15.5      | 389     | 1845        | 126     | 46    | 0   | 0    | 172   | 44           |
| 7W                         | 2007 | B         | 11/23-11/29 | 450                | 1757                  | 450            | 18.5      | 437     | 2034        | 79      | 37    | 0   | 0    | 116   | 27           |
| 7W                         | 2008 | B         | 11/28-12/04 | 450                | 1367                  | 450            | 25.2      | 442     | 2169        | 106     | 23    | 0   | 0    | 129   | 29           |
| 7W                         | 2004 | ALS       | 10/15-10/21 | 350                | 762                   | 350            | 31.2      | 347     | 1153        | 0       | 0     | 174 | 21   | 195   | 56           |
| 7W                         | 2005 | ALS       | 10/14-10/20 | 400                | 783                   | 400            | 34.6      | 379     | 1455        | 0       | 0     | 147 | 15   | 162   | 43           |
| 7W                         | 2006 | ALS       | 10/20-10/26 | 475                | 1015                  | 475            | 32.7      | 459     | 1637        | 0       | 0     | 230 | 33   | 263   | 57           |
| 7W                         | 2007 | ALS       | 10/19-10/25 | 500                | 1019                  | 499            | 35.3      | 486     | 1791        | 0       | 0     | 225 | 36   | 261   | 54           |
| 7W                         | 2008 | ALS       | 10/17-10/23 | 520                | 989                   | 520            | 37.7      | 507     | 2059        | 0       | 0     | 206 | 30   | 236   | 47           |
| 8                          | 2004 | BE        | 10/01-10/06 | 20                 | 2031                  | 22             | 0.8       | 22      | 105         | 18      | 0     | 0   | 0    | 18    | 82           |
| 8                          | 2004 | B         | 11/19-11/25 | 485                | 2069                  | 565            | 14.5      | 544     | 2354        | 139     | 28    | 0   | 0    | 167   | 31           |
| 8                          | 2005 | B         | 11/18-11/24 | 425                | 1825                  | 425            | 15.3      | 409     | 2009        | 78      | 22    | 0   | 0    | 100   | 24           |
| 8                          | 2006 | B         | 11/24-11/30 | 425                | 1706                  | 424            | 16.1      | 418     | 1961        | 105     | 21    | 0   | 0    | 126   | 30           |
| 8                          | 2007 | B         | 11/23-11/29 | 500                | 1741                  | 500            | 17.5      | 481     | 2205        | 114     | 43    | 0   | 0    | 157   | 33           |
| 8                          | 2008 | B         | 11/28-12/04 | 500                | 1298                  | 500            | 27.0      | 491     | 2379        | 172     | 27    | 0   | 0    | 199   | 41           |
| 8                          | 2004 | ALS       | 12/03-12/09 | 400                | 630                   | 400            | 38.7      | 388     | 1594        | 0       | 0     | 97  | 15   | 112   | 29           |
| 8                          | 2005 | ALS       | 12/02-12/08 | 200                | 368                   | 200            | 28.8      | 188     | 798         | 0       | 0     | 48  | 4    | 52    | 28           |
| 8                          | 2006 | ALS       | 12/01-12/07 | 200                | 383                   | 200            | 30.8      | 186     | 784         | 0       | 0     | 67  | 4    | 71    | 38           |
| 8                          | 2007 | ALS       | 11/30-12/06 | 200                | 288                   | 200            | 40.6      | 187     | 809         | 0       | 0     | 52  | 0    | 52    | 28           |
| 8                          | 2008 | ALS       | 12/05-12/11 | 200                | 244                   | 200            | 46.3      | 196     | 890         | 0       | 0     | 52  | 6    | 58    | 30           |
| 9                          | 2006 | BE        | 10/06-10/12 | 25                 | 4053                  | 25             | 0.5       | 25      | 85          | 25      | 0     | 0   | 0    | 25    | 100          |
| 9                          | 2007 | BE        | 9/28-10/04  | 25                 | 4224                  | 25             | 0.6       | 25      | 84          | 22      | 0     | 0   | 0    | 22    | 88           |
| 9                          | 2008 | BE        | 9/26-10/02  | 25                 | 3955                  | 25             | 0.6       | 25      | 102         | 23      | 0     | 0   | 0    | 23    | 92           |
| 9                          | 2004 | B         | 11/19-11/25 | 255                | 1532                  | 282            | 14.5      | 278     | 1336        | 76      | 9     | 0   | 0    | 85    | 31           |
| 9                          | 2005 | B         | 11/18-11/24 | 280                | 1255                  | 280            | 14.4      | 273     | 1343        | 109     | 12    | 0   | 0    | 121   | 44           |
| 9                          | 2006 | B         | 11/24-11/30 | 265                | 1086                  | 265            | 16.1      | 254     | 1172        | 106     | 11    | 0   | 0    | 117   | 46           |
| 9                          | 2007 | B         | 11/23-11/29 | 300                | 1194                  | 300            | 16.2      | 295     | 1380        | 143     | 14    | 0   | 0    | 157   | 53           |
| 9                          | 2008 | B         | 11/28-12/04 | 275                | 900                   | 275            | 18.9      | 268     | 1365        | 96      | 10    | 0   | 0    | 106   | 40           |
| 9                          | 2004 | ALS       | 10/15-10/21 | 350                | 508                   | 350            | 41.9      | 334     | 1233        | 0       | 0     | 160 | 24   | 184   | 55           |
| 9                          | 2004 | ALS       | 12/03-12/09 | 350                | 270                   | 350            | 70.7      | 340     | 1297        | 0       | 0     | 164 | 18   | 182   | 54           |
| 9                          | 2005 | ALS       | 10/14-10/20 | 400                | 601                   | 400            | 45.8      | 386     | 1574        | 0       | 0     | 149 | 13   | 162   | 42           |
| 9                          | 2005 | ALS       | 12/02-12/08 | 400                | 396                   | 400            | 57.6      | 388     | 1443        | 0       | 0     | 167 | 26   | 193   | 50           |
| 9                          | 2006 | ALS       | 10/20-10/26 | 400                | 638                   | 400            | 42.0      | 397     | 1535        | 0       | 0     | 175 | 27   | 202   | 51           |
| 9                          | 2006 | ALS       | 12/01-12/07 | 400                | 409                   | 400            | 54.8      | 385     | 1658        | 0       | 0     | 135 | 10   | 145   | 38           |
| 9                          | 2007 | ALS       | 10/19-10/25 | 400                | 665                   | 400            | 37.1      | 374     | 1499        | 0       | 0     | 152 | 20   | 172   | 46           |
| 9                          | 2007 | ALS       | 11/30-12/06 | 400                | 245                   | 398            | 72.7      | 378     | 1463        | 0       | 0     | 149 | 13   | 162   | 43           |
| 9                          | 2008 | ALS       | 10/17-10/23 | 400                | 584                   | 400            | 41.6      | 385     | 1546        | 0       | 0     | 212 | 17   | 229   | 59           |
| 9                          | 2008 | ALS       | 12/05-12/11 | 400                | 214                   | 400            | 73.4      | 393     | 1688        | 0       | 0     | 146 | 13   | 159   | 40           |
| 10                         | 2004 | BE        | 10/01-10/06 | 50                 | 6083                  | 61             | 1.0       | 61      | 208         | 52      | 0     | 0   | 0    | 52    | 85           |
| 10                         | 2005 | BE        | 9/30-10/05  | 50                 | 4855                  | 50             | 1.0       | 48      | 144         | 42      | 0     | 0   | 0    | 42    | 88           |
| 10                         | 2006 | BE        | 10/06-10/12 | 25                 | 3228                  | 25             | 0.7       | 25      | 108         | 22      | 0     | 0   | 0    | 22    | 88           |
| 10                         | 2007 | BE        | 9/28-10/04  | 25                 | 3448                  | 27             | 0.6       | 25      | 113         | 19      | 0     | 0   | 0    | 19    | 76           |
| 10                         | 2008 | BE        | 9/26-10/02  | 25                 | 1784                  | 25             | 0.8       | 25      | 86          | 25      | 0     | 0   | 0    | 25    | 100          |
| 10                         | 2004 | B         | 11/19-11/25 | 350                | 2018                  | 454            | 13.6      | 437     | 1791        | 166     | 25    | 0   | 0    | 191   | 44           |
| 10                         | 2005 | B         | 11/18-11/24 | 450                | 1854                  | 450            | 13.6      | 425     | 2059        | 126     | 11    | 0   | 0    | 137   | 32           |
| 10                         | 2006 | B         | 11/24-11/30 | 400                | 1645                  | 399            | 12.9      | 386     | 1861        | 108     | 15    | 0   | 0    | 123   | 32           |
| 10                         | 2007 | B         | 11/23-11/29 | 450                | 1602                  | 450            | 15.9      | 430     | 2056        | 131     | 11    | 0   | 0    | 142   | 33           |
| 10                         | 2008 | B         | 11/28-12/04 | 450                | 1181                  | 450            | 22.3      | 441     | 2089        | 150     | 17    | 0   | 0    | 167   | 38           |
| 10                         | 2004 | ALS       | 10/15-10/21 | 700                | 1138                  | 700            | 41.2      | 653     | 2746        | 0       | 0     | 140 | 25   | 165   | 25           |
| 10                         | 2004 | ALS       | 12/03-12/12 | 700                | 581                   | 700            | 64.5      | 652     | 2754        | 0       | 0     | 242 | 40   | 282   | 43           |
| 10                         | 2005 | ALS       | 10/14-10/20 | 800                | 904                   | 800            | 51.1      | 764     | 3206        | 0       | 0     | 118 | 21   | 139   | 18           |
| 10                         | 2005 | ALS       | 12/02-12/11 | 800                | 746                   | 800            | 60.6      | 761     | 3877        | 0       | 0     | 133 | 31   | 164   | 22           |

BE = Early Bull    B = Bull    ALS = Antlerless    AE = Any Elk    CN = Camp Navajo    CH = CHAMP Hunt    DV = Disabled Veteran

### Herd-Units:

CC = Canyon Creek    HM = Hutch Mtn.    MM = Melatone Mesa    SM = East Sunset/West Sunset/Meteor Crater    WI = Winslow  
ES (Unit 1) = Escudilla    M = Martinez    MZ = Mazatzal    TT = Twin Arrows/Two Guns/Grapevine    WS (17/20A/20C) = Williamson  
GV = Grapevine    ML = Marshall Lake    RV = Round Valley    VV = Verde Valley    Valley/Skull Valley/Kirkland Junction

# Elk Hunt Data

## 5-Year: 2004-2008 Harvest

| Unit                          |    | Year | Hunt Type | Dates       | Permits Authorized | 1st Choice Applicants | Permits Issued | Draw Odds | Hunters | Hunter Days | Harvest |       |     |      |       | Hunt Success |
|-------------------------------|----|------|-----------|-------------|--------------------|-----------------------|----------------|-----------|---------|-------------|---------|-------|-----|------|-------|--------------|
|                               |    |      |           |             |                    |                       |                |           |         |             | Bull    | Spike | Cow | Calf | Total |              |
| GENERAL (continued)           |    |      |           |             |                    |                       |                |           |         |             |         |       |     |      |       |              |
| 10                            |    | 2006 | ALS       | 10/20-10/26 | 800                | 841                   | 800            | 54.3      | 770     | 3376        | 0       | 0     | 147 | 22   | 169   | 22           |
| 10                            |    | 2006 | ALS       | 12/01-12/07 | 800                | 559                   | 800            | 68.7      | 757     | 3839        | 0       | 0     | 163 | 15   | 178   | 24           |
| 10                            |    | 2007 | ALS       | 10/19-10/25 | 600                | 646                   | 600            | 51.7      | 574     | 2500        | 0       | 0     | 136 | 24   | 160   | 28           |
| 10                            |    | 2007 | ALS       | 11/30-12/06 | 600                | 289                   | 599            | 85.8      | 568     | 2956        | 0       | 0     | 156 | 18   | 174   | 31           |
| 10                            |    | 2008 | ALS       | 10/17-10/23 | 600                | 555                   | 600            | 55.5      | 576     | 2595        | 0       | 0     | 120 | 13   | 133   | 23           |
| 10                            |    | 2008 | ALS       | 12/05-12/14 | 600                | 286                   | 600            | 93.7      | 567     | 2938        | 0       | 0     | 170 | 12   | 182   | 32           |
| 12                            |    | 2004 | AE        | 9/24-10/07  | 20                 | 46                    | 20             | 39.1      | 16      | 109         | 0       | 0     | 0   | 0    | 0     | 0            |
| 15A/15B/<br>17A/18/19B        |    | 2004 | AE        | 10/01-10/17 | 20                 | 287                   | 20             | 5.9       | 20      | 91          | 13      | 0     | 0   | 0    | 13    | 65           |
| 15A/15B/<br>17A/18/19B        |    | 2004 | AE        | 11/05-11/21 | 20                 | 71                    | 20             | 16.9      | 20      | 146         | 3       | 0     | 3   | 0    | 6     | 30           |
| 15A/15B/<br>17A/18/19B        |    | 2004 | AE        | 12/03-12/19 | 30                 | 116                   | 30             | 14.7      | 30      | 192         | 12      | 3     | 9   | 0    | 24    | 80           |
| 15A/15B/<br>17A/18/19B        |    | 2005 | AE        | 9/30-10/16  | 30                 | 338                   | 30             | 5.6       | 30      | 134         | 20      | 0     | 1   | 0    | 21    | 70           |
| 15A/15B/<br>17A/18/19B        |    | 2005 | AE        | 11/04-11/20 | 40                 | 44                    | 40             | 20.5      | 38      | 290         | 13      | 0     | 8   | 0    | 21    | 55           |
| 15A/15B/<br>17A/18/19B        |    | 2005 | AE        | 12/02-12/18 | 60                 | 140                   | 60             | 25.7      | 58      | 396         | 28      | 0     | 4   | 0    | 32    | 55           |
| 15A/15B/17/18/<br>19B/20A/20C |    | 2008 | B         | 10/03-10/16 | 60                 | 192                   | 60             | 19.3      | 60      | 330         | 45      | 0     | 0   | 0    | 45    | 75           |
| 15A/15B/17/18/<br>19B/20A/20C |    | 2004 | ALS       | 10/01-10/17 | 65                 | 45                    | 65             | 82.2      | 63      | 332         | 0       | 0     | 23  | 2    | 25    | 40           |
| 15A/15B/17/18/<br>19B/20A/20C |    | 2005 | ALS       | 9/30-10/16  | 80                 | 67                    | 80             | 65.7      | 76      | 473         | 0       | 0     | 20  | 4    | 24    | 32           |
| 15A/15B/17/18/<br>19B/20A/20C |    | 2006 | ALS       | 10/20-12/17 | 400                | 133                   | 398            | 98.5      | 379     | 3578        | 0       | 0     | 77  | 14   | 91    | 24           |
| 15A/15B/17/18/<br>19B/20A/20C |    | 2007 | ALS       | 10/19-12/16 | 400                | 127                   | 398            | 100.0     | 392     | 4243        | 0       | 0     | 70  | 11   | 81    | 21           |
| 15A/15B/17/18/<br>19B/20A/20C |    | 2008 | ALS       | 10/03-10/16 | 100                | 8                     | 100            | 100.0     | 89      | 489         | 0       | 0     | 9   | 2    | 11    | 12           |
| 15A/15B/17/18/<br>19B/20A/20C |    | 2008 | ALS       | 10/17-12/14 | 500                | 103                   | 500            | 99.0      | 462     | 5351        | 0       | 0     | 70  | 15   | 85    | 18           |
| 15A/15B/17/18/<br>19B/20A/20C |    | 2006 | AE        | 10/06-10/19 | 60                 | 358                   | 60             | 9.2       | 56      | 235         | 44      | 0     | 2   | 2    | 48    | 86           |
| 15A/15B/17/18/<br>19B/20A/20C |    | 2006 | AE        | 10/20-12/17 | 200                | 781                   | 200            | 15.7      | 193     | 1945        | 44      | 7     | 22  | 0    | 73    | 38           |
| 15A/15B/17/18/<br>19B/20A/20C |    | 2007 | AE        | 10/05-10/18 | 60                 | 255                   | 60             | 12.5      | 60      | 375         | 32      | 0     | 3   | 0    | 35    | 58           |
| 15A/15B/17/18/<br>19B/20A/20C |    | 2007 | AE        | 10/19-12/16 | 200                | 648                   | 195            | 16.8      | 191     | 1959        | 57      | 2     | 7   | 4    | 70    | 37           |
| 15A/15B/17/18/<br>19B/20A/20C |    | 2008 | AE        | 10/17-12/14 | 250                | 518                   | 250            | 30.1      | 233     | 2476        | 60      | 6     | 19  | 0    | 85    | 36           |
| 17/20A/20C                    | WS | 2004 | ALS       | 10/01-10/17 | 15                 | 6                     | 15             | 83.3      | 11      | 66          | 0       | 0     | 2   | 0    | 2     | 18           |
| 17/20A/20C                    | WS | 2004 | ALS       | 11/05-11/21 | 15                 | 0                     | 15             | —         | 15      | 108         | 0       | 0     | 6   | 0    | 6     | 40           |
| 17/20A/20C                    | WS | 2004 | ALS       | 12/03-12/19 | 15                 | 2                     | 15             | 100.0     | 15      | 83          | 0       | 0     | 0   | 3    | 3     | 20           |
| 17/20A/20C                    | WS | 2005 | ALS       | 9/30-10/16  | 20                 | 6                     | 20             | 100.0     | 18      | 88          | 0       | 0     | 5   | 0    | 5     | 28           |
| 17/20A/20C                    | WS | 2005 | ALS       | 11/04-11/20 | 20                 | 0                     | 20             | —         | 20      | 142         | 0       | 0     | 2   | 0    | 2     | 10           |
| 17/20A/20C                    | WS | 2005 | ALS       | 12/02-12/18 | 20                 | 6                     | 20             | 100.0     | 20      | 147         | 0       | 0     | 3   | 0    | 3     | 15           |
| 17/20A/20C                    | WS | 2004 | AE        | 10/01-10/17 | 5                  | 15                    | 5              | 33.3      | 5       | 47          | 3       | 0     | 0   | 0    | 3     | 60           |
| 17/20A/20C                    | WS | 2004 | AE        | 11/05-11/21 | 5                  | 10                    | 5              | 30.0      | 5       | 37          | 3       | 0     | 0   | 0    | 3     | 60           |
| 17/20A/20C                    | WS | 2004 | AE        | 12/03-12/19 | 5                  | 9                     | 5              | 11.1      | 3       | 17          | 0       | 0     | 0   | 0    | 0     | 0            |
| 17/20A/20C                    | WS | 2005 | AE        | 9/30-10/16  | 10                 | 26                    | 10             | 7.7       | 10      | 80          | 4       | 0     | 0   | 0    | 4     | 40           |
| 17/20A/20C                    | WS | 2005 | AE        | 11/04-11/20 | 10                 | 14                    | 10             | 28.6      | 10      | 76          | 1       | 0     | 0   | 0    | 1     | 10           |
| 17/20A/20C                    | WS | 2005 | AE        | 12/02-12/18 | 10                 | 2                     | 10             | 100.0     | 8       | 42          | 0       | 2     | 0   | 0    | 2     | 25           |
| 19A                           |    | 2004 | B         | 11/19-11/25 | 10                 | 111                   | 10             | 6.3       | 10      | 37          | 7       | 0     | 0   | 0    | 7     | 70           |
| 19A                           |    | 2005 | B         | 11/18-11/24 | 15                 | 136                   | 15             | 7.4       | 15      | 64          | 9       | 0     | 0   | 0    | 9     | 60           |
| 19A                           |    | 2006 | B         | 11/24-11/30 | 20                 | 74                    | 20             | 13.5      | 19      | 64          | 13      | 3     | 0   | 0    | 16    | 84           |
| 19A                           |    | 2007 | B         | 11/23-11/29 | 20                 | 76                    | 20             | 11.8      | 20      | 67          | 9       | 2     | 0   | 0    | 11    | 55           |
| 19A                           |    | 2008 | B         | 11/28-12/04 | 40                 | 110                   | 40             | 25.5      | 40      | 174         | 18      | 2     | 0   | 0    | 20    | 50           |
| 19A                           |    | 2004 | ALS       | 10/15-10/24 | 25                 | 31                    | 25             | 64.5      | 25      | 86          | 0       | 0     | 9   | 0    | 9     | 36           |
| 19A                           |    | 2004 | ALS       | 12/03-12/12 | 25                 | 9                     | 25             | 100.0     | 25      | 88          | 0       | 0     | 5   | 0    | 5     | 20           |
| 19A                           |    | 2005 | ALS       | 10/14-10/23 | 40                 | 33                    | 40             | 72.7      | 40      | 207         | 0       | 0     | 9   | 0    | 9     | 23           |
| 19A                           |    | 2005 | ALS       | 12/02-12/11 | 20                 | 11                    | 20             | 72.7      | 20      | 106         | 0       | 0     | 0   | 0    | 0     | 0            |
| 19A                           |    | 2006 | ALS       | 10/20-10/26 | 50                 | 22                    | 50             | 100.0     | 50      | 217         | 0       | 0     | 5   | 0    | 5     | 10           |
| 19A                           |    | 2006 | ALS       | 12/01-12/07 | 20                 | 10                    | 20             | 100.0     | 13      | 37          | 0       | 0     | 0   | 0    | 0     | 0            |
| 19A                           |    | 2007 | ALS       | 10/19-10/25 | 50                 | 39                    | 50             | 79.5      | 45      | 218         | 0       | 0     | 5   | 0    | 5     | 11           |
| 19A                           |    | 2007 | ALS       | 11/30-12/06 | 20                 | 14                    | 20             | 78.6      | 16      | 49          | 0       | 0     | 3   | 0    | 3     | 19           |
| 19A                           |    | 2008 | ALS       | 10/17-10/23 | 50                 | 20                    | 50             | 100.0     | 50      | 252         | 0       | 0     | 4   | 0    | 4     | 8            |
| 19A                           |    | 2008 | ALS       | 12/05-12/14 | 40                 | 7                     | 40             | 100.0     | 0       | 0           | 0       | 0     | 0   | 0    | 0     | —            |
| 21                            |    | 2004 | BE        | 10/01-10/06 | 5                  | 332                   | 6              | 1.5       | 5       | 11          | 5       | 0     | 0   | 0    | 5     | 100          |

BE = Early Bull    B = Bull    ALS = Antlerless    AE = Any Elk    CN = Camp Navajo    CH = CHAMP Hunt    DV = Disabled Veteran

# Elk Hunt Data

## 5-Year: 2004-2008 Harvest

| Unit                |    | Year | Hunt Type | Dates       | Permits Authorized | 1st Choice Applicants | Permits Issued | Draw Odds | Hunters | Hunter Days | Harvest |       |     |      |       | Hunt Success |
|---------------------|----|------|-----------|-------------|--------------------|-----------------------|----------------|-----------|---------|-------------|---------|-------|-----|------|-------|--------------|
|                     |    |      |           |             |                    |                       |                |           |         |             | Bull    | Spike | Cow | Calf | Total |              |
| GENERAL (continued) |    |      |           |             |                    |                       |                |           |         |             |         |       |     |      |       |              |
| 21                  |    | 2006 | BE        | 10/06-10/12 | 5                  | 221                   | 5              | 2.3       | 5       | 9           | 5       | 0     | 0   | 0    | 5     | 100          |
| 21                  |    | 2008 | BE        | 9/26-10/02  | 5                  | 146                   | 5              | 2.7       | 5       | 8           | 5       | 0     | 0   | 0    | 5     | 100          |
| 21                  |    | 2007 | B         | 11/30-12/06 | 5                  | 80                    | 5              | 6.3       | 0       | 0           | 0       | 0     | 0   | 0    | 0     | —            |
| 21                  |    | 2008 | B         | 11/28-12/04 | 10                 | 24                    | 10             | 12.5      | 10      | 50          | 6       | 0     | 0   | 0    | 6     | 60           |
| 22                  |    | 2004 | B         | 12/10-12/16 | 175                | 1211                  | 204            | 9.7       | 200     | 825         | 110     | 9     | 0   | 0    | 119   | 60           |
| 22                  | MZ | 2004 | B         | 10/22-10/28 | 5                  | 50                    | 6              | 8.0       | 5       | 20          | 2       | 0     | 0   | 0    | 2     | 40           |
| 22                  | MZ | 2005 | B         | 10/21-10/27 | 10                 | 38                    | 10             | 18.4      | 10      | 53          | 3       | 0     | 0   | 0    | 3     | 30           |
| 22N                 |    | 2004 | BE        | 10/01-10/06 | 30                 | 1378                  | 31             | 1.7       | 31      | 80          | 28      | 0     | 0   | 0    | 28    | 90           |
| 22N                 |    | 2005 | BE        | 9/30-10/05  | 30                 | 1106                  | 30             | 1.8       | 30      | 86          | 26      | 0     | 0   | 0    | 26    | 87           |
| 22N                 |    | 2006 | BE        | 10/06-10/12 | 30                 | 1251                  | 30             | 1.8       | 30      | 87          | 27      | 0     | 0   | 0    | 27    | 90           |
| 22N                 |    | 2007 | BE        | 9/28-10/04  | 30                 | 1213                  | 30             | 2.0       | 30      | 81          | 29      | 0     | 0   | 0    | 29    | 97           |
| 22N                 |    | 2008 | BE        | 9/26-10/02  | 30                 | 959                   | 30             | 2.4       | 30      | 90          | 26      | 0     | 0   | 0    | 26    | 87           |
| 22N                 |    | 2005 | B         | 12/02-12/08 | 100                | 696                   | 100            | 10.2      | 97      | 347         | 64      | 3     | 0   | 0    | 67    | 69           |
| 22N                 |    | 2005 | B         | 12/09-12/15 | 130                | 306                   | 130            | 13.7      | 121     | 490         | 61      | 4     | 0   | 0    | 65    | 54           |
| 22N                 |    | 2006 | B         | 12/01-12/07 | 150                | 716                   | 150            | 11.7      | 150     | 630         | 73      | 6     | 0   | 0    | 79    | 53           |
| 22N                 |    | 2006 | B         | 12/08-12/14 | 220                | 495                   | 220            | 21.0      | 214     | 949         | 92      | 15    | 0   | 0    | 107   | 50           |
| 22N                 |    | 2007 | B         | 11/30-12/06 | 300                | 807                   | 300            | 23.7      | 288     | 1358        | 102     | 12    | 0   | 0    | 114   | 40           |
| 22N                 |    | 2007 | B         | 12/08-12/14 | 320                | 393                   | 320            | 36.1      | 307     | 1388        | 104     | 13    | 0   | 0    | 117   | 38           |
| 22N                 |    | 2008 | B         | 11/28-12/04 | 350                | 629                   | 350            | 31.3      | 332     | 1451        | 95      | 13    | 0   | 0    | 108   | 33           |
| 22N                 |    | 2008 | B         | 12/05-12/11 | 400                | 546                   | 400            | 43.0      | 385     | 1819        | 87      | 35    | 0   | 0    | 122   | 32           |
| 22N                 |    | 2004 | ALS       | 10/22-10/28 | 85                 | 219                   | 85             | 23.3      | 83      | 272         | 0       | 0     | 50  | 2    | 52    | 63           |
| 22N                 |    | 2005 | ALS       | 10/21-10/27 | 85                 | 269                   | 85             | 22.7      | 83      | 273         | 0       | 0     | 47  | 6    | 53    | 64           |
| 22N                 |    | 2006 | ALS       | 10/20-10/26 | 130                | 272                   | 130            | 29.4      | 126     | 390         | 0       | 0     | 70  | 8    | 78    | 62           |
| 22N                 |    | 2007 | ALS       | 10/19-10/25 | 225                | 319                   | 225            | 47.3      | 220     | 820         | 0       | 0     | 71  | 9    | 80    | 36           |
| 22N                 |    | 2008 | ALS       | 10/17-10/23 | 225                | 355                   | 225            | 42.3      | 221     | 771         | 0       | 0     | 121 | 14   | 135   | 61           |
| 22S                 |    | 2005 | BE        | 9/30-10/05  | 30                 | 90                    | 30             | 10.0      | 30      | 112         | 26      | 2     | 0   | 0    | 28    | 93           |
| 22S                 |    | 2005 | B         | 12/02-12/08 | 50                 | 34                    | 50             | 32.4      | 48      | 186         | 18      | 0     | 0   | 0    | 18    | 38           |
| 22S                 |    | 2005 | B         | 12/09-12/15 | 30                 | 41                    | 30             | 29.3      | 30      | 117         | 23      | 0     | 0   | 0    | 23    | 77           |
| 22S                 |    | 2006 | B         | 12/01-12/07 | 30                 | 168                   | 30             | 12.5      | 28      | 106         | 14      | 2     | 0   | 0    | 16    | 57           |
| 22S                 |    | 2007 | B         | 11/30-12/06 | 30                 | 67                    | 30             | 20.9      | 28      | 124         | 9       | 0     | 0   | 0    | 9     | 32           |
| 22S                 |    | 2008 | B         | 11/28-12/04 | 30                 | 56                    | 30             | 32.1      | 28      | 99          | 15      | 2     | 0   | 0    | 17    | 61           |
| 22S                 |    | 2004 | ALS       | 10/22-10/28 | 15                 | 17                    | 15             | 52.9      | 15      | 55          | 0       | 0     | 0   | 0    | 0     | 0            |
| 22S                 |    | 2005 | ALS       | 10/21-10/27 | 15                 | 12                    | 15             | 41.7      | 15      | 54          | 0       | 0     | 4   | 0    | 4     | 27           |
| 22S                 |    | 2006 | ALS       | 10/20-10/26 | 15                 | 18                    | 15             | 27.8      | 14      | 30          | 0       | 0     | 7   | 1    | 8     | 57           |
| 22S                 |    | 2007 | ALS       | 10/19-10/25 | 15                 | 9                     | 15             | 77.8      | 15      | 53          | 0       | 0     | 2   | 2    | 4     | 27           |
| 22S                 |    | 2008 | ALS       | 10/17-10/23 | 30                 | 29                    | 30             | 48.3      | 30      | 116         | 0       | 0     | 10  | 3    | 13    | 43           |
| 23                  |    | 2004 | B         | 12/03-12/09 | 100                | 847                   | 117            | 9.0       | 113     | 458         | 59      | 4     | 0   | 0    | 63    | 56           |
| 23                  |    | 2005 | B         | 12/02-12/08 | 120                | 866                   | 120            | 8.4       | 116     | 512         | 58      | 2     | 0   | 0    | 60    | 52           |
| 23                  |    | 2006 | B         | 12/01-12/07 | 150                | 728                   | 150            | 10.7      | 144     | 671         | 49      | 2     | 0   | 0    | 51    | 35           |
| 23                  |    | 2007 | B         | 11/30-12/06 | 200                | 756                   | 200            | 12.6      | 194     | 822         | 84      | 4     | 0   | 0    | 88    | 45           |
| 23                  |    | 2008 | B         | 11/28-12/04 | 150                | 570                   | 150            | 16.5      | 142     | 628         | 73      | 3     | 0   | 0    | 76    | 54           |
| 23                  |    | 2008 | B         | 12/05-12/11 | 150                | 224                   | 150            | 25.0      | 143     | 665         | 54      | 0     | 0   | 0    | 54    | 38           |
| 23                  | CC | 2004 | ALS       | 8/06-8/09   | 8                  | 13                    | 8              | 46.2      | 8       | 16          | 0       | 0     | 4   | 0    | 4     | 50           |
| 23                  | CC | 2004 | ALS       | 8/13-8/16   | 8                  | 6                     | 8              | 83.3      | 8       | 24          | 0       | 0     | 2   | 0    | 2     | 25           |
| 23                  | CC | 2004 | ALS       | 9/03-9/06   | 8                  | 7                     | 8              | 100.0     | 8       | 18          | 0       | 0     | 3   | 0    | 3     | 38           |
| 23                  | CC | 2004 | ALS       | 9/10-9/13   | 8                  | 4                     | 8              | 100.0     | 8       | 13          | 0       | 0     | 5   | 0    | 5     | 63           |
| 23                  | CC | 2005 | ALS       | 8/05-8/08   | 8                  | 23                    | 8              | 30.4      | 8       | 12          | 0       | 0     | 4   | 2    | 6     | 75           |
| 23                  | CC | 2005 | ALS       | 8/12-8/15   | 8                  | 1                     | 8              | 100.0     | 8       | 19          | 0       | 0     | 0   | 0    | 0     | 0            |
| 23                  | CC | 2005 | ALS       | 9/02-9/05   | 8                  | 8                     | 8              | 75.0      | 5       | 5           | 0       | 0     | 5   | 0    | 5     | 100          |
| 23                  | CC | 2005 | ALS       | 9/09-9/12   | 8                  | 33                    | 8              | 21.2      | 8       | 19          | 0       | 0     | 5   | 1    | 6     | 75           |
| 23                  | CC | 2006 | ALS       | 8/11-8/14   | 8                  | 22                    | 8              | 36.4      | 8       | 11          | 0       | 0     | 8   | 0    | 8     | 100          |
| 23                  | CC | 2006 | ALS       | 8/18-8/21   | 8                  | 4                     | 8              | 50.0      | 8       | 17          | 0       | 0     | 5   | 0    | 5     | 63           |
| 23                  | CC | 2006 | ALS       | 9/08-9/11   | 8                  | 12                    | 8              | 25.0      | 8       | 14          | 0       | 0     | 7   | 1    | 8     | 100          |
| 23                  | CC | 2006 | ALS       | 9/15-9/18   | 8                  | 7                     | 8              | 42.9      | 8       | 8           | 0       | 0     | 8   | 0    | 8     | 100          |
| 23                  | CC | 2007 | ALS       | 8/10-8/13   | 8                  | 22                    | 8              | 36.4      | 8       | 17          | 0       | 0     | 4   | 0    | 4     | 50           |
| 23                  | CC | 2007 | ALS       | 8/17-8/20   | 8                  | 2                     | 8              | 50.0      | 7       | 19          | 0       | 0     | 3   | 1    | 4     | 57           |
| 23                  | CC | 2007 | ALS       | 9/07-9/10   | 8                  | 8                     | 8              | 62.5      | 8       | 23          | 0       | 0     | 3   | 0    | 3     | 38           |
| 23                  | CC | 2007 | ALS       | 9/14-9/17   | 8                  | 15                    | 8              | 40.0      | 8       | 24          | 0       | 0     | 6   | 0    | 6     | 75           |
| 23                  | CC | 2008 | ALS       | 8/08-8/11   | 8                  | 9                     | 8              | 33.3      | 6       | 16          | 0       | 0     | 3   | 0    | 3     | 50           |
| 23                  | CC | 2008 | ALS       | 8/15-8/18   | 8                  | 2                     | 8              | 50.0      | 6       | 21          | 0       | 0     | 0   | 0    | 0     | 0            |
| 23                  | CC | 2008 | ALS       | 9/05-9/08   | 8                  | 6                     | 8              | 50.0      | 5       | 5           | 0       | 0     | 5   | 0    | 5     | 100          |

BE = Early Bull    B = Bull    ALS = Antlerless    AE = Any Elk    CN = Camp Navajo    CH = CHAMP Hunt    DV = Disabled Veteran

### Herd-Units:

CC = Canyon Creek    HM = Hutch Mtn.    MM = Melatone Mesa    SM = East Sunset/West Sunset/Meteor Crater    WI = Winslow  
ES (Unit 1) = Escudilla    M = Martinez    MZ = Mazatzal    TT = Twin Arrows/Two Guns/Grapevine    WS (17/20A/20C) = Williamson  
GV = Grapevine    ML = Marshall Lake    RV = Round Valley    VV = Verde Valley    Valley/Skull Valley/Kirkland Junction

# Elk Hunt Data

## 5-Year: 2004-2008 Harvest

| Unit                |    | Year | Hunt Type | Dates       | Permits Authorized | 1st Choice Applicants | Permits Issued | Draw Odds | Hunters | Hunter Days | Harvest |       |     |      |       | Hunt Success |
|---------------------|----|------|-----------|-------------|--------------------|-----------------------|----------------|-----------|---------|-------------|---------|-------|-----|------|-------|--------------|
|                     |    |      |           |             |                    |                       |                |           |         |             | Bull    | Spike | Cow | Calf | Total |              |
| GENERAL (continued) |    |      |           |             |                    |                       |                |           |         |             |         |       |     |      |       |              |
| 23                  | CC | 2008 | ALS       | 9/12-9/15   | 8                  | 9                     | 8              | 44.4      | 8       | 20          | 0       | 0     | 4   | 2    | 6     | 75           |
| 23N                 |    | 2004 | BE        | 10/01-10/06 | 20                 | 1173                  | 20             | 1.4       | 20      | 48          | 20      | 0     | 0   | 0    | 20    | 100          |
| 23N                 |    | 2005 | BE        | 9/30-10/05  | 20                 | 1173                  | 20             | 1.7       | 20      | 64          | 17      | 0     | 0   | 0    | 17    | 85           |
| 23N                 |    | 2006 | BE        | 10/06-10/12 | 20                 | 1157                  | 20             | 1.2       | 20      | 83          | 16      | 0     | 0   | 0    | 16    | 80           |
| 23N                 |    | 2007 | BE        | 9/28-10/04  | 20                 | 1511                  | 20             | 1.3       | 20      | 51          | 19      | 0     | 0   | 0    | 19    | 95           |
| 23N                 |    | 2008 | BE        | 9/26-10/02  | 15                 | 1090                  | 15             | 1.3       | 15      | 47          | 15      | 0     | 0   | 0    | 15    | 100          |
| 23N                 |    | 2004 | ALS       | 10/22-10/28 | 30                 | 92                    | 30             | 19.6      | 30      | 88          | 0       | 0     | 19  | 0    | 19    | 63           |
| 23N                 |    | 2004 | ALS       | 12/10-12/16 | 90                 | 141                   | 90             | 36.2      | 87      | 332         | 0       | 0     | 38  | 3    | 41    | 47           |
| 23N                 |    | 2005 | ALS       | 10/21-10/27 | 30                 | 114                   | 30             | 21.1      | 30      | 127         | 0       | 0     | 7   | 0    | 7     | 23           |
| 23N                 |    | 2005 | ALS       | 12/09-12/15 | 90                 | 89                    | 90             | 38.2      | 83      | 341         | 0       | 0     | 25  | 2    | 27    | 33           |
| 23N                 |    | 2006 | ALS       | 10/27-11/02 | 30                 | 119                   | 30             | 18.5      | 25      | 80          | 0       | 0     | 10  | 0    | 10    | 40           |
| 23N                 |    | 2006 | ALS       | 12/15-12/21 | 90                 | 100                   | 90             | 44.0      | 88      | 305         | 0       | 0     | 39  | 0    | 39    | 44           |
| 23N                 |    | 2007 | ALS       | 12/07-12/13 | 100                | 126                   | 100            | 38.1      | 89      | 283         | 0       | 0     | 35  | 5    | 40    | 45           |
| 23N                 |    | 2008 | ALS       | 10/17-10/23 | 120                | 152                   | 120            | 50.0      | 113     | 459         | 0       | 0     | 46  | 5    | 51    | 45           |
| 23S                 |    | 2006 | BE        | 10/06-10/12 | 15                 | 385                   | 15             | 1.6       | 14      | 52          | 11      | 0     | 0   | 0    | 11    | 79           |
| 23S                 |    | 2004 | ALS       | 10/22-10/28 | 20                 | 33                    | 20             | 27.3      | 17      | 63          | 0       | 0     | 3   | 0    | 3     | 18           |
| 23S                 |    | 2004 | ALS       | 12/10-12/16 | 20                 | 6                     | 20             | 100.0     | 16      | 80          | 0       | 0     | 4   | 0    | 4     | 25           |
| 23S                 |    | 2005 | ALS       | 10/21-10/27 | 20                 | 25                    | 20             | 12.0      | 20      | 77          | 0       | 0     | 7   | 0    | 7     | 35           |
| 23S                 |    | 2005 | ALS       | 12/09-12/15 | 20                 | 38                    | 20             | 28.9      | 16      | 60          | 0       | 0     | 4   | 0    | 4     | 25           |
| 23S                 |    | 2006 | ALS       | 10/27-11/02 | 20                 | 7                     | 20             | 14.3      | 20      | 120         | 0       | 0     | 4   | 0    | 4     | 20           |
| 23S                 |    | 2006 | ALS       | 12/15-12/21 | 20                 | 14                    | 20             | 42.9      | 19      | 76          | 0       | 0     | 4   | 0    | 4     | 21           |
| 23S                 |    | 2007 | ALS       | 10/26-11/01 | 20                 | 21                    | 20             | 33.3      | 17      | 77          | 0       | 0     | 3   | 0    | 3     | 18           |
| 23S                 |    | 2007 | ALS       | 12/07-12/13 | 20                 | 6                     | 20             | 100.0     | 16      | 64          | 0       | 0     | 0   | 0    | 0     | 0            |
| 24A                 |    | 2005 | ALS       | 12/01-12/12 | 7                  | 2                     | 7              | 50.0      | 7       | 41          | 0       | 0     | 1   | 0    | 1     | 14           |
| 24A                 |    | 2006 | ALS       | 12/01-12/12 | 10                 | 4                     | 10             | 100.0     | 10      | 63          | 0       | 0     | 3   | 0    | 3     | 30           |
| 24A                 |    | 2007 | ALS       | 11/30-12/11 | 10                 | 1                     | 10             | 100.0     | 7       | 33          | 0       | 0     | 0   | 0    | 0     | 0            |
| 24A                 |    | 2008 | ALS       | 11/28-12/09 | 10                 | 1                     | 10             | 100.0     | 10      | 53          | 0       | 0     | 0   | 0    | 0     | 0            |
| 24A                 |    | 2004 | AE        | 12/01-12/12 | 5                  | 62                    | 5              | 8.1       | 5       | 43          | 0       | 0     | 0   | 0    | 0     | 0            |
| 24A                 |    | 2005 | AE        | 12/01-12/12 | 3                  | 21                    | 3              | 14.3      | 3       | 23          | 0       | 0     | 0   | 0    | 0     | 0            |
| 24A                 |    | 2006 | AE        | 12/01-12/12 | 5                  | 26                    | 5              | 11.5      | 5       | 28          | 0       | 0     | 3   | 0    | 3     | 60           |
| 24A                 |    | 2007 | AE        | 12/01-12/12 | 5                  | 17                    | 5              | 17.6      | 5       | 48          | 0       | 0     | 0   | 0    | 0     | 0            |
| 24A                 |    | 2008 | AE        | 12/01-12/12 | 5                  | 9                     | 5              | 33.3      | 5       | 38          | 1       | 0     | 0   | 0    | 1     | 20           |
| 27                  |    | 2004 | BE        | 10/01-10/06 | 25                 | 1485                  | 32             | 1.1       | 31      | 109         | 18      | 0     | 0   | 0    | 18    | 58           |
| 27                  |    | 2006 | BE        | 10/06-10/12 | 25                 | 2465                  | 25             | 1.0       | 24      | 105         | 15      | 0     | 0   | 0    | 15    | 63           |
| 27                  |    | 2007 | BE        | 9/28-10/04  | 25                 | 1328                  | 25             | 1.1       | 25      | 87          | 22      | 0     | 0   | 0    | 22    | 88           |
| 27                  |    | 2008 | BE        | 9/26-10/02  | 25                 | 1925                  | 25             | 1.3       | 22      | 84          | 21      | 0     | 0   | 0    | 21    | 95           |
| 27                  |    | 2004 | B         | 11/19-11/25 | 350                | 1582                  | 397            | 12.9      | 392     | 1746        | 117     | 15    | 0   | 0    | 132   | 34           |
| 27                  |    | 2005 | B         | 11/18-11/24 | 350                | 1377                  | 350            | 14.2      | 348     | 1736        | 108     | 12    | 0   | 0    | 120   | 34           |
| 27                  |    | 2006 | B         | 11/24-11/30 | 350                | 1211                  | 349            | 12.6      | 336     | 1528        | 99      | 6     | 0   | 0    | 105   | 31           |
| 27                  |    | 2007 | B         | 11/23-11/29 | 350                | 947                   | 348            | 17.3      | 340     | 1625        | 113     | 10    | 0   | 0    | 123   | 36           |
| 27                  |    | 2008 | B         | 11/28-12/04 | 400                | 1045                  | 400            | 17.1      | 385     | 1751        | 142     | 19    | 0   | 0    | 161   | 42           |
| 27                  |    | 2004 | ALS       | 10/22-10/25 | 175                | 656                   | 175            | 20.7      | 167     | 528         | 0       | 0     | 51  | 3    | 54    | 32           |
| 27                  |    | 2005 | ALS       | 10/21-10/24 | 140                | 433                   | 140            | 19.2      | 134     | 435         | 0       | 0     | 25  | 0    | 25    | 19           |
| 27                  |    | 2006 | ALS       | 10/27-11/02 | 70                 | 298                   | 70             | 17.8      | 68      | 273         | 0       | 0     | 34  | 3    | 37    | 54           |
| 27                  |    | 2007 | ALS       | 10/26-11/01 | 150                | 349                   | 150            | 25.8      | 143     | 580         | 0       | 0     | 59  | 7    | 66    | 46           |
| 27                  |    | 2008 | ALS       | 10/17-10/23 | 170                | 375                   | 170            | 27.7      | 160     | 647         | 0       | 0     | 71  | 6    | 77    | 48           |
| 27                  | M  | 2007 | ALS       | 8/17-8/23   | 30                 | 1                     | 28             | 100.0     | 25      | 101         | 0       | 0     | 3   | 0    | 3     | 12           |
| 27                  | M  | 2008 | ALS       | 8/15-8/21   | 30                 | 2                     | 30             | 100.0     | 12      | 66          | 0       | 0     | 6   | 0    | 6     | 50           |
| 27                  | M  | 2007 | AE        | 8/17-8/23   | 20                 | 28                    | 16             | 32.1      | 16      | 59          | 8       | 0     | 0   | 0    | 8     | 50           |
| 27                  | M  | 2008 | AE        | 8/15-8/21   | 20                 | 14                    | 20             | 92.9      | 17      | 60          | 3       | 0     | 0   | 0    | 3     | 18           |
| 27S                 |    | 2005 | ALS       | 8/19-8/25   | 50                 | 16                    | 50             | 100.0     | 45      | 160         | 0       | 0     | 12  | 0    | 12    | 27           |
| 27S                 |    | 2006 | ALS       | 8/18-8/24   | 75                 | 39                    | 75             | 100.0     | 69      | 257         | 0       | 0     | 2   | 0    | 2     | 3            |
| 27S                 |    | 2007 | ALS       | 8/17-8/23   | 50                 | 12                    | 50             | 100.0     | 48      | 191         | 0       | 0     | 4   | 6    | 10    | 21           |
| 27S                 |    | 2008 | ALS       | 8/15-8/21   | 50                 | 9                     | 50             | 100.0     | 41      | 174         | 0       | 0     | 0   | 3    | 3     | 7            |
| 28/31               |    | 2004 | ALS       | 10/01-11/14 | 10                 | 13                    | 10             | 46.2      | 10      | 83          | 0       | 0     | 2   | 0    | 2     | 20           |
| 28/31               |    | 2004 | ALS       | 11/19-12/31 | 10                 | 7                     | 10             | 57.1      | 10      | 140         | 0       | 0     | 0   | 0    | 0     | 0            |
| 28/31               |    | 2005 | ALS       | 9/30-11/13  | 10                 | 10                    | 10             | 70.0      | 10      | 160         | 0       | 0     | 0   | 0    | 0     | 0            |
| 28/31               |    | 2005 | ALS       | 11/18-12/31 | 10                 | 10                    | 10             | 50.0      | 5       | 70          | 0       | 0     | 0   | 0    | 0     | 0            |
| 28/31/32            |    | 2006 | ALS       | 10/06-11/02 | 15                 | 7                     | 15             | 71.4      | 12      | 30          | 0       | 0     | 12  | 0    | 12    | 100          |
| 28/31/32            |    | 2006 | ALS       | 11/03-11/30 | 15                 | 1                     | 15             | 100.0     | 13      | 145         | 0       | 0     | 3   | 0    | 3     | 23           |
| 28/31/32            |    | 2006 | ALS       | 12/01-12/31 | 15                 | 19                    | 15             | 63.2      | 15      | 173         | 0       | 0     | 0   | 0    | 0     | 0            |
| 28/31/32            |    | 2007 | ALS       | 10/05-11/01 | 15                 | 1                     | 12             | 100.0     | 12      | 129         | 0       | 0     | 3   | 0    | 3     | 25           |
| 28/31/32            |    | 2007 | ALS       | 11/02-11/29 | 25                 | 2                     | 25             | 100.0     | 23      | 127         | 0       | 0     | 2   | 2    | 4     | 17           |
| 28/31/32            |    | 2007 | ALS       | 11/30-12/31 | 25                 | 2                     | 25             | 100.0     | 21      | 152         | 0       | 0     | 2   | 0    | 2     | 10           |
| 28/31/32            |    | 2008 | ALS       | 10/03-10/30 | 15                 | 1                     | 15             | 0.0       | 15      | 99          | 0       | 0     | 0   | 0    | 0     | 0            |
| 28/31/32            |    | 2008 | ALS       | 10/31-11/29 | 25                 | 1                     | 25             | 100.0     | 25      | 167         | 0       | 0     | 0   | 0    | 0     | 0            |
| 28/31/32            |    | 2008 | ALS       | 11/28-12/29 | 25                 | 0                     | 25             | -         | 13      | 46          | 0       | 0     | 0   | 0    | 0     | 0            |

BE = Early Bull    B = Bull    ALS = Antlerless    AE = Any Elk    CN = Camp Navajo    CH = CHAMP Hunt    DV = Disabled Veteran



# Elk Hunt Data

## 5-Year: 2004-2008 Harvest

| Unit                       |    | Year | Hunt Type | Dates       | Permits Authorized | 1st Choice Applicants | Permits Issued | Draw Odds | Hunters | Hunter Days | Harvest |       |     |      |       | Hunt Success |
|----------------------------|----|------|-----------|-------------|--------------------|-----------------------|----------------|-----------|---------|-------------|---------|-------|-----|------|-------|--------------|
|                            |    |      |           |             |                    |                       |                |           |         |             | Bull    | Spike | Cow | Calf | Total |              |
| <b>GENERAL (continued)</b> |    |      |           |             |                    |                       |                |           |         |             |         |       |     |      |       |              |
| 28/31/32                   |    | 2007 | AE        | 10/05-11/01 | 10                 | 43                    | 10             | 9.3       | 10      | 64          | 6       | 0     | 0   | 0    | 6     | 60           |
| 28/31/32                   |    | 2008 | AE        | 10/03-10/30 | 10                 | 34                    | 10             | 14.7      | 10      | 40          | 0       | 5     | 0   | 0    | 5     | 50           |
| CN                         |    | 2004 | ALS       | 11/08-11/28 | 35                 | 19                    | 35             | 100.0     | 33      | 142         | 0       | 0     | 10  | 0    | 10    | 30           |
| CN                         |    | 2004 | ALS       | 11/08-11/28 | 5                  | 21                    | 5              | 19.0      | 5       | 10          | 0       | 0     | 2   | 0    | 2     | 40           |
| CN                         |    | 2004 | ALS       | 10/08-10/14 | 5                  | 0                     | 5              | —         | 5       | 7           | 0       | 0     | 3   | 0    | 3     | 60           |
| CN                         |    | 2004 | ALS       | 10/08-10/14 | 2                  | 3                     | 2              | 66.7      | 2       | 6           | 0       | 0     | 2   | 0    | 2     | 100          |
| CN                         |    | 2005 | ALS       | 11/07-11/27 | 35                 | 18                    | 35             | 100.0     | 35      | 216         | 0       | 0     | 8   | 0    | 8     | 23           |
| CN                         |    | 2005 | ALS       | 11/07-11/27 | 5                  | 17                    | 5              | 23.5      | 5       | 18          | 0       | 0     | 3   | 0    | 3     | 60           |
| CN                         |    | 2005 | ALS       | 10/07-10/13 | 5                  | 0                     | 5              | —         | 4       | 13          | 0       | 0     | 2   | 0    | 2     | 50           |
| CN                         |    | 2005 | ALS       | 10/07-10/13 | 2                  | 5                     | 2              | 0.0       | 2       | 4           | 0       | 0     | 0   | 1    | 1     | 50           |
| CN                         |    | 2006 | ALS       | 11/24-12/07 | 35                 | 15                    | 35             | 100.0     | 32      | 105         | 0       | 0     | 15  | 2    | 17    | 53           |
| CN                         |    | 2006 | ALS       | 11/24-12/07 | 5                  | 7                     | 5              | 42.9      | 5       | 23          | 0       | 0     | 3   | 0    | 3     | 60           |
| CN                         |    | 2006 | ALS       | 9/29-10/05  | 5                  | 1                     | 5              | 100.0     | 5       | 18          | 0       | 0     | 5   | 0    | 5     | 100          |
| CN                         |    | 2006 | ALS       | 9/29-10/05  | 2                  | 1                     | 2              | 100.0     | 2       | 8           | 0       | 0     | 0   | 2    | 2     | 100          |
| CN                         |    | 2007 | ALS       | 11/23-12/06 | 35                 | 14                    | 35             | 100.0     | 35      | 120         | 0       | 0     | 20  | 2    | 22    | 63           |
| CN                         |    | 2007 | ALS       | 11/23-12/06 | 5                  | 12                    | 5              | 41.7      | 4       | 8           | 0       | 0     | 3   | 0    | 3     | 75           |
| CN                         |    | 2007 | ALS       | 9/28-10/04  | 5                  | 3                     | 5              | 66.7      | 5       | 15          | 0       | 0     | 3   | 0    | 3     | 60           |
| CN                         |    | 2007 | ALS       | 9/28-10/04  | 2                  | 1                     | 2              | 0.0       | 1       | 5           | 0       | 0     | 1   | 0    | 1     | 100          |
| CN                         |    | 2008 | ALS       | 9/26-10/02  | 5                  | 0                     | 5              | —         | 5       | 23          | 0       | 0     | 0   | 3    | 3     | 60           |
| CN                         |    | 2008 | ALS       | 9/26-10/02  | 2                  | 4                     | 2              | 0.0       | 2       | 9           | 0       | 0     | 2   | 0    | 2     | 100          |
| CN                         |    | 2008 | ALS       | 11/21-12/11 | 35                 | 9                     | 35             | 100.0     | 31      | 116         | 0       | 0     | 20  | 2    | 22    | 71           |
| CN                         |    | 2008 | ALS       | 11/21-12/11 | 5                  | 12                    | 5              | 41.7      | 5       | 22          | 0       | 0     | 2   | 2    | 4     | 80           |
| CN                         | DV | 2004 | ALS       | 10/15-10/21 | 14                 | 5                     | 14             | 60.0      | 14      | 82          | 0       | 0     | 3   | 2    | 5     | 36           |
| CN                         | DV | 2005 | ALS       | 10/14-10/20 | 14                 | 3                     | 14             | 100.0     | 14      | 56          | 0       | 0     | 3   | 2    | 5     | 36           |
| CN                         | DV | 2006 | ALS       | 10/20-10/26 | 14                 | 5                     | 14             | 40.0      | 12      | 40          | 0       | 0     | 6   | 2    | 8     | 67           |
| CN                         | DV | 2007 | ALS       | 10/19-10/25 | 14                 | 7                     | 14             | 57.1      | 13      | 46          | 0       | 0     | 7   | 0    | 7     | 54           |
| CN                         | DV | 2008 | ALS       | 10/17-10/23 | 14                 | 4                     | 14             | 50.0      | 14      | 61          | 0       | 0     | 4   | 0    | 4     | 29           |
| CN                         |    | 2004 | AE        | 10/08-10/14 | 5                  | 36                    | 5              | 13.9      | 5       | 20          | 2       | 0     | 3   | 0    | 5     | 100          |
| CN                         |    | 2004 | AE        | 10/08-10/14 | 2                  | 32                    | 2              | 6.3       | 2       | 5           | 1       | 0     | 1   | 0    | 2     | 100          |
| CN                         |    | 2004 | AE        | 10/22-10/28 | 25                 | 22                    | 25             | 63.6      | 24      | 61          | 7       | 0     | 7   | 6    | 20    | 83           |
| CN                         |    | 2004 | AE        | 10/22-10/28 | 4                  | 17                    | 4              | 11.8      | 2       | 12          | 2       | 0     | 0   | 0    | 2     | 100          |
| CN                         |    | 2005 | AE        | 10/07-10/13 | 5                  | 45                    | 5              | 8.9       | 5       | 18          | 1       | 1     | 1   | 0    | 3     | 60           |
| CN                         |    | 2005 | AE        | 10/07-10/13 | 2                  | 48                    | 2              | 4.2       | 2       | 6           | 0       | 0     | 0   | 0    | 0     | 0            |
| CN                         |    | 2005 | AE        | 10/21-10/27 | 25                 | 45                    | 25             | 31.1      | 25      | 106         | 6       | 0     | 8   | 2    | 16    | 64           |
| CN                         |    | 2005 | AE        | 10/21-10/27 | 4                  | 27                    | 4              | 0.0       | 4       | 22          | 2       | 0     | 0   | 0    | 2     | 50           |
| CN                         |    | 2006 | AE        | 9/29-10/05  | 5                  | 51                    | 5              | 9.8       | 5       | 15          | 5       | 0     | 0   | 0    | 5     | 100          |
| CN                         |    | 2006 | AE        | 9/29-10/05  | 2                  | 16                    | 2              | 6.3       | 2       | 4           | 2       | 0     | 0   | 0    | 2     | 100          |
| CN                         |    | 2006 | AE        | 10/27-11/02 | 25                 | 29                    | 25             | 44.8      | 25      | 105         | 2       | 5     | 2   | 0    | 9     | 36           |
| CN                         |    | 2006 | AE        | 10/27-11/02 | 4                  | 10                    | 4              | 10.0      | 4       | 12          | 3       | 1     | 0   | 0    | 4     | 100          |
| CN                         |    | 2007 | AE        | 9/28-10/04  | 5                  | 57                    | 5              | 8.8       | 4       | 12          | 2       | 1     | 0   | 0    | 3     | 75           |
| CN                         |    | 2007 | AE        | 9/28-10/04  | 2                  | 33                    | 2              | 6.1       | 2       | 4           | 2       | 0     | 0   | 0    | 2     | 100          |
| CN                         |    | 2007 | AE        | 10/26-11/01 | 25                 | 36                    | 25             | 30.6      | 23      | 100         | 0       | 0     | 5   | 0    | 5     | 22           |
| CN                         |    | 2007 | AE        | 10/26-11/01 | 4                  | 8                     | 4              | 12.5      | 4       | 15          | 0       | 0     | 1   | 0    | 1     | 25           |
| CN                         |    | 2008 | AE        | 9/26-10/02  | 5                  | 48                    | 5              | 8.3       | 5       | 13          | 5       | 0     | 0   | 0    | 5     | 100          |
| CN                         |    | 2008 | AE        | 9/26-10/02  | 2                  | 42                    | 2              | 4.8       | 2       | 4           | 2       | 0     | 0   | 0    | 2     | 100          |
| CN                         |    | 2008 | AE        | 10/24-10/30 | 25                 | 27                    | 25             | 55.6      | 21      | 98          | 2       | 0     | 2   | 0    | 4     | 19           |
| CN                         |    | 2008 | AE        | 10/24-10/30 | 4                  | 7                     | 4              | 14.3      | 4       | 15          | 3       | 0     | 1   | 0    | 4     | 100          |
| CN                         | DV | 2004 | AE        | 10/15-10/21 | 7                  | 37                    | 7              | 18.9      | 4       | 11          | 4       | 0     | 0   | 0    | 4     | 100          |
| CN                         | DV | 2005 | AE        | 10/14-10/20 | 7                  | 34                    | 7              | 20.6      | 7       | 34          | 0       | 0     | 6   | 0    | 6     | 86           |
| CN                         | DV | 2006 | AE        | 10/20-10/26 | 7                  | 33                    | 7              | 18.2      | 6       | 25          | 2       | 1     | 1   | 0    | 4     | 67           |
| CN                         | DV | 2007 | AE        | 10/19-10/25 | 7                  | 30                    | 7              | 20.0      | 7       | 25          | 6       | 0     | 0   | 0    | 6     | 86           |
| CN                         | DV | 2008 | AE        | 10/17-10/23 | 7                  | 34                    | 7              | 20.6      | 7       | 33          | 0       | 2     | 0   | 0    | 2     | 29           |
| <b>JUNIORS-ONLY</b>        |    |      |           |             |                    |                       |                |           |         |             |         |       |     |      |       |              |
| 1/2C                       |    | 2004 | ALS       | 10/15-10/18 | 150                | 479                   | 150            | 26.1      | 146     | 342         | 0       | 0     | 94  | 9    | 103   | 71           |
| 1/2C                       |    | 2005 | ALS       | 10/14-10/17 | 150                | 444                   | 150            | 25.9      | 144     | 366         | 0       | 0     | 71  | 15   | 86    | 60           |
| 1/2C                       |    | 2006 | ALS       | 10/20-10/26 | 65                 | 414                   | 65             | 10.6      | 56      | 154         | 0       | 0     | 48  | 0    | 48    | 86           |
| 1/2C                       |    | 2007 | ALS       | 10/19-10/25 | 160                | 592                   | 160            | 21.3      | 158     | 419         | 0       | 0     | 116 | 14   | 130   | 82           |
| 1/2C                       |    | 2008 | ALS       | 10/17-10/23 | 160                | 492                   | 160            | 27.6      | 156     | 352         | 0       | 0     | 103 | 6    | 109   | 70           |
| 3A/3C                      |    | 2008 | ALS       | 10/17-10/23 | 250                | 270                   | 250            | 46.3      | 246     | 793         | 0       | 0     | 111 | 9    | 120   | 49           |
| 4A                         |    | 2004 | ALS       | 10/22-10/27 | 200                | 437                   | 200            | 33.6      | 194     | 546         | 0       | 0     | 112 | 10   | 122   | 63           |
| 4A                         |    | 2005 | ALS       | 10/21-10/26 | 275                | 419                   | 275            | 41.3      | 256     | 762         | 0       | 0     | 83  | 31   | 114   | 45           |

BE = Early Bull    B = Bull    ALS = Antlerless    AE = Any Elk    CN = Camp Navajo    CH = CHAMP Hunt    DV = Disabled Veteran

### Herd-Units:

CC = Canyon Creek    HM = Hutch Mtn.    MM = Melatone Mesa    SM = East Sunset/West Sunset/Meteor Crater    WI = Winslow  
ES (Unit 1) = Escudilla    M = Martinez    MZ = Mazatzal    TT = Twin Arrows/Two Guns/Grapevine    WS (17/20A/20C) = Williamson  
GV = Grapevine    ML = Marshall Lake    RV = Round Valley    VV = Verde Valley    Valley/Skull Valley/Kirkland Junction



# Elk Hunt Data

## 5-Year: 2004-2008 Harvest

| Unit                            | Year | Hunt Type | Dates       | Permits Authorized | 1st Choice Applicants | Permits Issued | Draw Odds | Hunters | Hunter Days | Harvest |       |     |      |       | Hunt Success |
|---------------------------------|------|-----------|-------------|--------------------|-----------------------|----------------|-----------|---------|-------------|---------|-------|-----|------|-------|--------------|
|                                 |      |           |             |                    |                       |                |           |         |             | Bull    | Spike | Cow | Calf | Total |              |
| <b>JUNIORS-ONLY (continued)</b> |      |           |             |                    |                       |                |           |         |             |         |       |     |      |       |              |
| 4A                              | 2006 | ALS       | 10/20-10/26 | 220                | 425                   | 220            | 37.2      | 214     | 679         | 0       | 0     | 80  | 7    | 87    | 41           |
| 4A                              | 2007 | ALS       | 10/19-10/25 | 220                | 429                   | 220            | 36.4      | 207     | 635         | 0       | 0     | 93  | 0    | 93    | 45           |
| 4A                              | 2008 | ALS       | 10/17-10/23 | 100                | 227                   | 100            | 39.2      | 96      | 264         | 0       | 0     | 49  | 7    | 56    | 58           |
| 6AN/6AS                         | 2004 | ALS       | 10/15-10/18 | 575                | 1559                  | 575            | 33.5      | 567     | 1424        | 0       | 0     | 291 | 48   | 339   | 60           |
| 6AN/6AS                         | 2005 | ALS       | 10/14-10/17 | 635                | 1466                  | 636            | 37.8      | 625     | 1713        | 0       | 0     | 276 | 20   | 296   | 47           |
| 6AN/6AS                         | 2006 | ALS       | 10/20-10/26 | 765                | 1581                  | 762            | 40.5      | 739     | 2170        | 0       | 0     | 355 | 40   | 395   | 53           |
| 6AN/6AS                         | 2007 | ALS       | 10/19-10/25 | 765                | 1868                  | 761            | 35.0      | 720     | 2046        | 0       | 0     | 391 | 45   | 436   | 61           |
| 6AN/6AS                         | 2008 | ALS       | 10/17-10/23 | 765                | 1708                  | 765            | 39.4      | 739     | 2200        | 0       | 0     | 285 | 68   | 353   | 48           |
| 22N                             | 2007 | ALS       | 10/12-10/18 | 20                 | 67                    | 20             | 16.4      | 18      | 76          | 0       | 0     | 7   | 0    | 7     | 39           |
| 22N                             | 2008 | ALS       | 10/10-10/16 | 30                 | 96                    | 30             | 28.1      | 30      | 83          | 0       | 0     | 19  | 2    | 21    | 70           |
| 23N                             | 2007 | ALS       | 10/19-10/25 | 20                 | 61                    | 20             | 27.9      | 18      | 63          | 0       | 0     | 11  | 0    | 11    | 61           |
| 23S                             | 2008 | ALS       | 10/17-10/23 | 30                 | 24                    | 30             | 70.8      | 21      | 94          | 0       | 0     | 6   | 0    | 6     | 29           |
| 27                              | 2004 | ALS       | 10/15-10/18 | 100                | 193                   | 100            | 32.1      | 89      | 243         | 0       | 0     | 35  | 9    | 44    | 49           |
| 27                              | 2005 | ALS       | 10/14-10/17 | 100                | 133                   | 100            | 51.9      | 98      | 298         | 0       | 0     | 29  | 2    | 31    | 32           |
| 27                              | 2006 | ALS       | 10/20-10/26 | 95                 | 160                   | 95             | 29.4      | 91      | 283         | 0       | 0     | 49  | 6    | 55    | 60           |
| <b>MUZZLELOADER</b>             |      |           |             |                    |                       |                |           |         |             |         |       |     |      |       |              |
| 1/2B/2C                         | 2006 | BE        | 10/06-10/12 | 40                 | 1561                  | 40             | 2.0       | 40      | 185         | 24      | 0     | 0   | 0    | 24    | 60           |
| 1/2B/2C                         | 2008 | BE        | 9/26-10/02  | 40                 | 1515                  | 40             | 2.0       | 40      | 139         | 39      | 0     | 0   | 0    | 39    | 98           |
| 3A/3C                           | 2007 | BE        | 9/28-10/04  | 30                 | 1295                  | 30             | 2.1       | 30      | 113         | 26      | 0     | 0   | 0    | 26    | 87           |
| 3B                              | 2004 | BE        | 10/01-10/06 | 30                 | 546                   | 34             | 4.6       | 34      | 150         | 27      | 0     | 0   | 0    | 27    | 79           |
| 3B                              | 2007 | BE        | 9/28-10/04  | 20                 | 251                   | 20             | 4.4       | 20      | 86          | 13      | 0     | 0   | 0    | 13    | 65           |
| 3B                              | 2008 | BE        | 9/26-10/02  | 20                 | 310                   | 20             | 1.9       | 20      | 87          | 13      | 0     | 0   | 0    | 13    | 65           |
| 3B                              | 2008 | BE        | 11/28-12/04 | 150                | 95                    | 150            | 63.2      | 139     | 676         | 21      | 17    | 0   | 0    | 38    | 27           |
| 3B                              | 2008 | ALS       | 12/12-12/31 | 250                | 51                    | 250            | 100.0     | 231     | 1267        | 0       | 0     | 95  | 10   | 105   | 45           |
| 4A                              | 2005 | BE        | 9/30-10/05  | 10                 | 333                   | 10             | 2.7       | 10      | 37          | 5       | 2     | 0   | 0    | 7     | 70           |
| 4B                              | 2004 | BE        | 10/01-10/06 | 40                 | 631                   | 42             | 4.3       | 42      | 176         | 20      | 0     | 0   | 0    | 20    | 48           |
| 4B                              | 2006 | BE        | 10/06-10/12 | 40                 | 281                   | 40             | 10.3      | 39      | 168         | 18      | 0     | 0   | 0    | 18    | 46           |
| 4B                              | 2004 | ALS       | 10/22-10/27 | 250                | 207                   | 250            | 61.8      | 240     | 983         | 0       | 0     | 51  | 4    | 55    | 23           |
| 4B                              | 2005 | ALS       | 10/21-10/26 | 225                | 248                   | 225            | 59.7      | 213     | 876         | 0       | 0     | 24  | 2    | 26    | 12           |
| 4B                              | 2006 | ALS       | 10/20-10/26 | 175                | 149                   | 175            | 62.4      | 171     | 711         | 0       | 0     | 40  | 0    | 40    | 23           |
| 4B                              | 2007 | ALS       | 10/19-10/25 | 175                | 177                   | 175            | 63.8      | 170     | 690         | 0       | 0     | 44  | 4    | 48    | 28           |
| 5BN                             | 2005 | BE        | 9/30-10/05  | 40                 | 747                   | 40             | 2.8       | 39      | 150         | 31      | 0     | 0   | 0    | 31    | 79           |
| 5BS                             | 2004 | BE        | 10/01-10/06 | 30                 | 838                   | 32             | 3.1       | 32      | 86          | 32      | 0     | 0   | 0    | 32    | 100          |
| 6A                              | 2004 | BE        | 11/12-11/17 | 300                | 1558                  | 335            | 14.1      | 329     | 1297        | 152     | 19    | 0   | 0    | 171   | 52           |
| 6A                              | 2005 | BE        | 11/11-11/16 | 425                | 1705                  | 425            | 17.0      | 412     | 1740        | 151     | 29    | 0   | 0    | 180   | 44           |
| 6A                              | 2006 | BE        | 10/06-10/12 | 50                 | 1358                  | 50             | 3.2       | 50      | 229         | 34      | 0     | 0   | 0    | 34    | 68           |
| 6A                              | 2006 | BE        | 11/17-11/23 | 390                | 1175                  | 390            | 16.3      | 375     | 1571        | 139     | 30    | 0   | 0    | 169   | 45           |
| 6A                              | 2007 | BE        | 11/16-11/22 | 390                | 1566                  | 390            | 15.7      | 385     | 1674        | 125     | 44    | 0   | 0    | 169   | 44           |
| 6A                              | 2008 | BE        | 11/14-11/20 | 450                | 1496                  | 450            | 20.3      | 430     | 1952        | 131     | 38    | 0   | 0    | 169   | 39           |
| 6A                              | 2004 | ALS       | 11/12-11/17 | 360                | 346                   | 360            | 38.7      | 340     | 1362        | 0       | 0     | 112 | 9    | 121   | 36           |
| 6A                              | 2005 | ALS       | 11/11-11/16 | 300                | 288                   | 300            | 41.7      | 281     | 1121        | 0       | 0     | 86  | 17   | 103   | 37           |
| 6A                              | 2006 | ALS       | 11/17-11/23 | 250                | 328                   | 250            | 37.8      | 231     | 997         | 0       | 0     | 68  | 2    | 70    | 30           |
| 6A                              | 2007 | ALS       | 11/16-11/22 | 325                | 294                   | 325            | 37.8      | 320     | 1302        | 0       | 0     | 89  | 15   | 104   | 33           |
| 6A                              | 2008 | ALS       | 11/14-11/20 | 200                | 242                   | 200            | 32.6      | 195     | 843         | 0       | 0     | 66  | 7    | 73    | 37           |
| 6AS                             | 2007 | BE        | 9/28-10/04  | 25                 | 688                   | 25             | 2.2       | 24      | 93          | 21      | 1     | 0   | 0    | 22    | 92           |
| 6B                              | 2008 | BE        | 9/26-10/02  | 25                 | 277                   | 25             | 5.8       | 25      | 125         | 14      | 1     | 0   | 0    | 15    | 60           |
| 8                               | 2004 | ALS       | 10/15-10/21 | 200                | 250                   | 200            | 52.4      | 192     | 729         | 0       | 0     | 69  | 15   | 84    | 44           |
| 8                               | 2005 | ALS       | 10/14-10/20 | 200                | 290                   | 200            | 42.4      | 190     | 852         | 0       | 0     | 41  | 9    | 50    | 26           |
| 8                               | 2006 | ALS       | 10/06-10/12 | 150                | 181                   | 150            | 43.1      | 139     | 617         | 0       | 0     | 51  | 3    | 54    | 39           |
| 8                               | 2007 | ALS       | 9/28-10/04  | 150                | 263                   | 150            | 34.2      | 144     | 619         | 0       | 0     | 55  | 16   | 71    | 49           |
| 8                               | 2008 | ALS       | 9/26-10/02  | 150                | 237                   | 150            | 38.8      | 146     | 593         | 0       | 0     | 70  | 18   | 88    | 60           |
| 16A                             | 2004 | BE        | 10/01-10/06 | 3                  | 39                    | 3              | 5.1       | 3       | 3           | 3       | 0     | 0   | 0    | 3     | 100          |
| 16A                             | 2005 | BE        | 9/30-10/05  | 3                  | 31                    | 3              | 9.7       | 3       | 18          | 2       | 0     | 0   | 0    | 2     | 67           |
| 16A                             | 2006 | BE        | 10/06-10/12 | 3                  | 14                    | 3              | 7.1       | 0       | 0           | 0       | 0     | 0   | 0    | 0     | -            |
| 16A                             | 2007 | BE        | 9/28-10/04  | 3                  | 24                    | 3              | 4.2       | 3       | 14          | 0       | 0     | 0   | 0    | 0     | 0            |
| 16A                             | 2008 | BE        | 9/26-10/02  | 3                  | 13                    | 3              | 7.7       | 3       | 12          | 2       | 0     | 0   | 0    | 2     | 67           |
| 21                              | 2005 | BE        | 9/30-10/05  | 5                  | 125                   | 5              | 2.4       | 5       | 18          | 5       | 0     | 0   | 0    | 5     | 100          |
| 21                              | 2007 | BE        | 9/28-10/04  | 5                  | 89                    | 5              | 3.4       | 5       | 16          | 5       | 0     | 0   | 0    | 5     | 100          |
| 22S                             | 2006 | BE        | 10/06-10/12 | 20                 | 144                   | 20             | 5.6       | 20      | 92          | 11      | 0     | 0   | 0    | 11    | 55           |
| 22S                             | 2007 | BE        | 9/28-10/04  | 40                 | 172                   | 40             | 12.2      | 37      | 181         | 15      | 0     | 0   | 0    | 15    | 41           |
| 22S                             | 2008 | BE        | 9/26-10/02  | 40                 | 161                   | 40             | 15.5      | 40      | 166         | 21      | 3     | 0   | 0    | 24    | 60           |
| 23S                             | 2004 | BE        | 10/01-10/06 | 20                 | 331                   | 26             | 4.8       | 24      | 118         | 14      | 0     | 0   | 0    | 14    | 58           |
| 23S                             | 2008 | BE        | 9/26-10/02  | 15                 | 272                   | 15             | 3.7       | 15      | 68          | 10      | 0     | 0   | 0    | 10    | 67           |
| 27                              | 2005 | BE        | 9/30-10/05  | 25                 | 791                   | 25             | 2.3       | 25      | 110         | 9       | 0     | 0   | 0    | 9     | 36           |
| CN                              | 2004 | BE        | 9/24-10/01  | 10                 | 31                    | 10             | 29.0      | 10      | 40          | 4       | 1     | 0   | 0    | 5     | 50           |
| CN                              | 2004 | BE        | 9/24-10/01  | 3                  | 28                    | 3              | 10.7      | 3       | 6           | 3       | 0     | 0   | 0    | 3     | 100          |
| CN                              | 2007 | ALSS      | 10/05-10/11 | 25                 | 0                     | 25             | -         | 23      | 85          | 0       | 0     | 10  | 0    | 10    | 43           |

BE = Early Bull B = Bull ALS = Antlerless AE = Any Elk CN = Camp Navajo CH = CHAMP Hunt DV = Disabled Veteran

# Elk Hunt Data

## 5-Year: 2004-2008 Harvest

| Unit                     |  | Year | Hunt Type | Dates       | Permits Authorized | 1st Choice Applicants | Permits Issued | Draw Odds | Hunters | Hunter Days | Harvest |       |     |      |       | Hunt Success |
|--------------------------|--|------|-----------|-------------|--------------------|-----------------------|----------------|-----------|---------|-------------|---------|-------|-----|------|-------|--------------|
|                          |  |      |           |             |                    |                       |                |           |         |             | Bull    | Spike | Cow | Calf | Total |              |
| MUZZLELOADER (continued) |  |      |           |             |                    |                       |                |           |         |             |         |       |     |      |       |              |
| CN                       |  | 2004 | ALS       | 9/24-10/01  | 25                 | 5                     | 25             | 100.0     | 25      | 120         | 0       | 0     | 10  | 0    | 10    | 40           |
| CN                       |  | 2004 | ALS       | 9/24-10/01  | 5                  | 4                     | 5              | 75.0      | 5       | 12          | 0       | 0     | 3   | 0    | 3     | 60           |
| CN                       |  | 2005 | ALS       | 9/23-9/30   | 25                 | 1                     | 25             | 100.0     | 22      | 108         | 0       | 0     | 6   | 0    | 6     | 27           |
| CN                       |  | 2005 | ALS       | 9/23-9/30   | 5                  | 4                     | 5              | 0.0       | 5       | 20          | 0       | 0     | 1   | 0    | 1     | 20           |
| CN                       |  | 2006 | ALS       | 10/06-10/12 | 25                 | 0                     | 25             | —         | 20      | 95          | 0       | 0     | 2   | 0    | 2     | 10           |
| CN                       |  | 2006 | ALS       | 10/06-10/12 | 5                  | 4                     | 5              | 100.0     | 3       | 13          | 0       | 0     | 0   | 0    | 0     | 0            |
| CN                       |  | 2007 | ALS       | 10/05-10/11 | 5                  | 3                     | 5              | 66.7      | 5       | 30          | 0       | 0     | 1   | 0    | 1     | 20           |
| CN                       |  | 2008 | ALS       | 10/10-10/16 | 25                 | 5                     | 25             | 100.0     | 25      | 120         | 0       | 0     | 5   | 0    | 5     | 20           |
| CN                       |  | 2008 | ALS       | 10/10-10/16 | 5                  | 8                     | 5              | 37.5      | 5       | 33          | 0       | 0     | 0   | 0    | 0     | 0            |
| CN                       |  | 2005 | AE        | 9/23-9/30   | 10                 | 49                    | 10             | 16.3      | 10      | 53          | 0       | 0     | 3   | 0    | 3     | 30           |
| CN                       |  | 2005 | AE        | 9/23-9/30   | 3                  | 60                    | 3              | 5.0       | 2       | 13          | 0       | 0     | 0   | 0    | 0     | 0            |
| CN                       |  | 2006 | AE        | 10/06-10/12 | 10                 | 31                    | 10             | 32.3      | 10      | 47          | 3       | 3     | 3   | 0    | 9     | 90           |
| CN                       |  | 2006 | AE        | 10/06-10/12 | 3                  | 12                    | 3              | 25.0      | 3       | 18          | 0       | 0     | 0   | 0    | 0     | 0            |
| CN                       |  | 2007 | AE        | 10/05-10/11 | 10                 | 24                    | 10             | 25.0      | 10      | 39          | 3       | 0     | 1   | 1    | 5     | 50           |
| CN                       |  | 2007 | AE        | 10/05-10/11 | 3                  | 12                    | 3              | 25.0      | 3       | 21          | 0       | 0     | 0   | 0    | 0     | 0            |
| CN                       |  | 2008 | AE        | 10/10-10/16 | 10                 | 27                    | 10             | 25.9      | 10      | 50          | 0       | 0     | 0   | 0    | 0     | 0            |
| CN                       |  | 2008 | AE        | 10/10-10/16 | 3                  | 14                    | 3              | 7.1       | 3       | 8           | 2       | 0     | 0   | 0    | 2     | 67           |
| ARCHERY                  |  |      |           |             |                    |                       |                |           |         |             |         |       |     |      |       |              |
| 1                        |  | 2004 | B         | 9/17-9/30   | 150                | 2647                  | 170            | 5.2       | 170     | 1420        | 76      | 0     | 0   | 0    | 76    | 45           |
| 1                        |  | 2005 | B         | 9/16-9/29   | 150                | 2344                  | 150            | 5.1       | 150     | 1083        | 93      | 2     | 0   | 0    | 95    | 63           |
| 1                        |  | 2004 | ALS       | 9/17-9/30   | 250                | 213                   | 250            | 42.3      | 236     | 1519        | 0       | 0     | 63  | 2    | 65    | 28           |
| 1                        |  | 2005 | ALS       | 9/16-9/29   | 325                | 202                   | 325            | 48.0      | 317     | 2022        | 0       | 0     | 77  | 4    | 81    | 26           |
| 1/2B/2C                  |  | 2006 | B         | 9/22-10/05  | 150                | 2614                  | 150            | 4.6       | 150     | 1214        | 70      | 0     | 0   | 0    | 70    | 47           |
| 1/2B/2C                  |  | 2007 | B         | 9/14-9/27   | 150                | 2847                  | 150            | 3.9       | 144     | 1285        | 80      | 2     | 0   | 0    | 82    | 57           |
| 1/2B/2C                  |  | 2008 | B         | 9/12-9/25   | 150                | 2241                  | 150            | 5.3       | 148     | 1218        | 73      | 4     | 0   | 0    | 77    | 52           |
| 1/2B/2C                  |  | 2008 | B         | 11/14-11/27 | 25                 | 24                    | 25             | 37.5      | 25      | 168         | 5       | 5     | 0   | 0    | 10    | 40           |
| 1/2B/2C                  |  | 2006 | ALS       | 9/22-10/05  | 170                | 137                   | 170            | 27.0      | 168     | 1026        | 0       | 0     | 41  | 6    | 47    | 28           |
| 1/2B/2C                  |  | 2007 | ALS       | 9/14-9/27   | 50                 | 51                    | 50             | 9.8       | 50      | 308         | 0       | 0     | 10  | 2    | 12    | 24           |
| 1/2B/2C                  |  | 2008 | ALS       | 9/12-9/25   | 75                 | 62                    | 75             | 30.6      | 73      | 520         | 0       | 0     | 10  | 0    | 10    | 14           |
| 3A/3C                    |  | 2004 | B         | 9/17-9/30   | 50                 | 960                   | 54             | 4.8       | 54      | 406         | 38      | 0     | 0   | 0    | 38    | 70           |
| 3A/3C                    |  | 2005 | B         | 9/16-9/29   | 90                 | 1392                  | 90             | 5.5       | 90      | 667         | 67      | 0     | 0   | 0    | 67    | 74           |
| 3A/3C                    |  | 2006 | B         | 9/22-10/05  | 100                | 1463                  | 100            | 5.5       | 100     | 770         | 63      | 0     | 0   | 0    | 63    | 63           |
| 3A/3C                    |  | 2007 | B         | 9/14-9/27   | 100                | 1722                  | 100            | 3.8       | 97      | 838         | 55      | 5     | 0   | 0    | 60    | 62           |
| 3A/3C                    |  | 2008 | B         | 9/12-9/25   | 150                | 1647                  | 150            | 7.0       | 150     | 1271        | 86      | 0     | 0   | 0    | 86    | 57           |
| 3A/3C                    |  | 2008 | B         | 11/14-11/27 | 25                 | 10                    | 25             | 100.0     | 25      | 194         | 6       | 0     | 0   | 0    | 6     | 24           |
| 3A/3C                    |  | 2004 | ALS       | 9/17-9/30   | 50                 | 64                    | 50             | 37.5      | 47      | 260         | 0       | 0     | 10  | 3    | 13    | 28           |
| 3A/3C                    |  | 2005 | ALS       | 9/16-9/29   | 50                 | 34                    | 50             | 61.8      | 50      | 326         | 0       | 0     | 6   | 3    | 9     | 18           |
| 3A/3C                    |  | 2006 | ALS       | 9/22-10/05  | 70                 | 40                    | 70             | 55.0      | 65      | 406         | 0       | 0     | 19  | 2    | 21    | 32           |
| 3A/3C                    |  | 2007 | ALS       | 9/14-9/27   | 70                 | 42                    | 70             | 42.9      | 65      | 427         | 0       | 0     | 14  | 2    | 16    | 25           |
| 3A/3C                    |  | 2008 | ALS       | 9/12-9/25   | 70                 | 32                    | 70             | 50.0      | 68      | 399         | 0       | 0     | 7   | 2    | 9     | 13           |
| 3B                       |  | 2004 | B         | 9/17-9/30   | 25                 | 178                   | 28             | 9.6       | 26      | 215         | 22      | 2     | 0   | 0    | 24    | 92           |
| 3B                       |  | 2005 | B         | 9/16-9/29   | 25                 | 239                   | 25             | 5.9       | 25      | 250         | 8       | 0     | 0   | 0    | 8     | 32           |
| 3B                       |  | 2006 | B         | 9/22-10/05  | 25                 | 171                   | 25             | 8.8       | 25      | 175         | 13      | 0     | 0   | 0    | 13    | 52           |
| 3B                       |  | 2007 | B         | 9/14-9/27   | 25                 | 231                   | 25             | 7.4       | 25      | 203         | 15      | 0     | 0   | 0    | 15    | 60           |
| 3B                       |  | 2008 | B         | 9/12-9/25   | 75                 | 251                   | 75             | 18.3      | 74      | 642         | 38      | 0     | 0   | 0    | 38    | 51           |
| 3B                       |  | 2008 | B         | 11/14-11/27 | 25                 | 11                    | 25             | 63.6      | 25      | 196         | 6       | 0     | 0   | 0    | 6     | 24           |
| 3B                       |  | 2004 | ALS       | 9/17-9/30   | 15                 | 17                    | 15             | 47.1      | 15      | 128         | 0       | 0     | 0   | 0    | 0     | 0            |
| 3B                       |  | 2005 | ALS       | 9/16-9/29   | 15                 | 3                     | 15             | 33.3      | 15      | 98          | 0       | 0     | 2   | 2    | 4     | 27           |
| 3B                       |  | 2006 | ALS       | 9/22-10/05  | 15                 | 4                     | 15             | 100.0     | 15      | 101         | 0       | 0     | 3   | 0    | 3     | 20           |
| 3B                       |  | 2007 | ALS       | 9/14-9/27   | 15                 | 22                    | 15             | 31.8      | 15      | 94          | 0       | 0     | 2   | 0    | 2     | 13           |
| 3B                       |  | 2008 | ALS       | 9/12-9/25   | 25                 | 8                     | 25             | 87.5      | 25      | 221         | 0       | 0     | 2   | 0    | 2     | 8            |
| 4A                       |  | 2004 | B         | 9/17-9/30   | 125                | 1065                  | 129            | 9.1       | 127     | 925         | 46      | 0     | 0   | 0    | 46    | 36           |
| 4A                       |  | 2005 | B         | 9/16-9/29   | 150                | 1111                  | 150            | 11.3      | 150     | 994         | 76      | 5     | 0   | 0    | 81    | 54           |
| 4A                       |  | 2006 | B         | 9/22-10/05  | 175                | 1269                  | 175            | 11.3      | 171     | 1434        | 56      | 2     | 0   | 0    | 58    | 34           |
| 4A                       |  | 2007 | B         | 9/14-9/27   | 175                | 1242                  | 175            | 11.0      | 171     | 1411        | 58      | 6     | 0   | 0    | 64    | 37           |
| 4A                       |  | 2008 | B         | 9/12-9/25   | 225                | 1179                  | 225            | 13.5      | 219     | 1783        | 94      | 2     | 0   | 0    | 96    | 44           |
| 4A                       |  | 2008 | B         | 11/14-11/27 | 25                 | 19                    | 25             | 100.0     | 19      | 106         | 0       | 6     | 0   | 0    | 6     | 32           |
| 4A                       |  | 2004 | ALS       | 9/17-9/30   | 200                | 210                   | 200            | 32.9      | 198     | 1142        | 0       | 0     | 78  | 8    | 86    | 43           |
| 4A                       |  | 2005 | ALS       | 9/16-9/29   | 300                | 202                   | 300            | 57.9      | 294     | 1969        | 0       | 0     | 76  | 6    | 82    | 28           |
| 4A                       |  | 2006 | ALS       | 9/22-10/05  | 295                | 152                   | 295            | 55.9      | 289     | 1972        | 0       | 0     | 64  | 2    | 66    | 23           |
| 4A                       |  | 2007 | ALS       | 9/14-9/27   | 80                 | 39                    | 80             | 17.9      | 74      | 392         | 0       | 0     | 36  | 2    | 38    | 51           |

BE = Early Bull    B = Bull    ALS = Antlerless    AE = Any Elk    CN = Camp Navajo    CH = CHAMP Hunt    DV = Disabled Veteran

### Herd-Units:

CC = Canyon Creek    HM = Hutch Mtn.    MM = Melatone Mesa    SM = East Sunset/West Sunset/Meteor Crater    WI = Winslow  
ES (Unit 1) = Escudilla    M = Martinez    MZ = Mazatzal    TT = Twin Arrows/Two Guns/Grapevine    WS (17/20A/20C) = Williamson  
GV = Grapevine    ML = Marshall Lake    RV = Round Valley    VV = Verde Valley    Valley/Skull Valley/Kirkland Junction

# Elk Hunt Data

## 5-Year: 2004-2008 Harvest

| Unit                |    | Year | Hunt Type | Dates       | Permits Authorized | 1st Choice Applicants | Permits Issued | Draw Odds | Hunters | Hunter Days | Harvest |       |     |      |       | Hunt Success |
|---------------------|----|------|-----------|-------------|--------------------|-----------------------|----------------|-----------|---------|-------------|---------|-------|-----|------|-------|--------------|
|                     |    |      |           |             |                    |                       |                |           |         |             | Bull    | Spike | Cow | Calf | Total |              |
| ARCHERY (continued) |    |      |           |             |                    |                       |                |           |         |             |         |       |     |      |       |              |
| 4A                  |    | 2008 | ALS       | 9/12-9/25   | 80                 | 36                    | 80             | 25.0      | 74      | 554         | 0       | 0     | 19  | 0    | 19    | 26           |
| 4B                  |    | 2004 | B         | 9/17-9/30   | 125                | 458                   | 133            | 14.8      | 131     | 1106        | 37      | 0     | 0   | 0    | 37    | 28           |
| 4B                  |    | 2005 | B         | 9/16-9/29   | 150                | 417                   | 150            | 14.9      | 150     | 1220        | 52      | 0     | 0   | 0    | 52    | 35           |
| 4B                  |    | 2006 | B         | 9/22-10/05  | 150                | 390                   | 150            | 15.1      | 144     | 1270        | 22      | 0     | 0   | 0    | 22    | 15           |
| 4B                  |    | 2007 | B         | 9/14-9/27   | 150                | 416                   | 151            | 14.7      | 146     | 1314        | 44      | 0     | 0   | 0    | 44    | 30           |
| 4B                  |    | 2008 | B         | 9/12-9/25   | 200                | 372                   | 200            | 26.6      | 196     | 1747        | 57      | 4     | 0   | 0    | 61    | 31           |
| 4B                  |    | 2008 | B         | 11/14-11/27 | 25                 | 11                    | 25             | 100.0     | 23      | 153         | 0       | 0     | 0   | 0    | 0     | 0            |
| 4B                  |    | 2004 | ALS       | 9/17-9/30   | 100                | 34                    | 100            | 58.8      | 96      | 724         | 0       | 0     | 2   | 0    | 2     | 2            |
| 4B                  |    | 2005 | ALS       | 9/16-9/29   | 75                 | 17                    | 75             | 100.0     | 65      | 438         | 0       | 0     | 9   | 0    | 9     | 14           |
| 4B                  |    | 2006 | ALS       | 9/22-10/05  | 50                 | 24                    | 50             | 70.8      | 50      | 324         | 0       | 0     | 7   | 0    | 7     | 14           |
| 4B                  |    | 2007 | ALS       | 9/14-9/27   | 50                 | 24                    | 50             | 37.5      | 50      | 336         | 0       | 0     | 6   | 2    | 8     | 16           |
| 4B                  |    | 2008 | ALS       | 9/12-9/25   | 50                 | 15                    | 50             | 73.3      | 50      | 333         | 0       | 0     | 6   | 0    | 6     | 12           |
| 4B/5A               | WI | 2004 | ALS       | 9/01-9/30   | 5                  | 1                     | 5              | 0.0       | 0       | 0           | 0       | 0     | 0   | 0    | 0     | -            |
| 4B/5A               | WI | 2004 | ALS       | 9/17-10/14  | 10                 | 2                     | 10             | 100.0     | 10      | 20          | 0       | 0     | 0   | 0    | 0     | 0            |
| 4B/5A               | WI | 2004 | ALS       | 10/01-10/31 | 5                  | 0                     | 7              | -         | 7       | 47          | 0       | 0     | 2   | 0    | 2     | 29           |
| 4B/5A               | WI | 2004 | ALS       | 10/14-11/14 | 10                 | 0                     | 10             | -         | 10      | 60          | 0       | 0     | 0   | 0    | 0     | 0            |
| 4B/5A               | WI | 2005 | ALS       | 9/01-9/29   | 5                  | 3                     | 5              | 100.0     | 5       | 43          | 0       | 0     | 0   | 0    | 0     | 0            |
| 4B/5A               | WI | 2005 | ALS       | 9/16-10/13  | 10                 | 0                     | 10             | -         | 10      | 58          | 0       | 0     | 0   | 0    | 0     | 0            |
| 4B/5A               | WI | 2005 | ALS       | 9/30-10/31  | 5                  | 0                     | 5              | -         | 5       | 15          | 0       | 0     | 0   | 0    | 0     | 0            |
| 4B/5A               | WI | 2005 | ALS       | 10/14-11/13 | 10                 | 0                     | 10             | -         | 6       | 26          | 0       | 0     | 0   | 0    | 0     | 0            |
| 4B/5A               | WI | 2004 | AE        | 9/01-9/30   | 5                  | 7                     | 5              | 42.9      | 3       | 16          | 0       | 0     | 0   | 0    | 0     | 0            |
| 4B/5A               | WI | 2004 | AE        | 10/01-10/31 | 5                  | 7                     | 5              | 42.9      | 0       | 0           | 0       | 0     | 0   | 0    | 0     | -            |
| 4B/5A               | WI | 2005 | AE        | 9/01-9/30   | 5                  | 4                     | 5              | 75.0      | 5       | 58          | 0       | 0     | 3   | 0    | 3     | 60           |
| 4B/5A               | WI | 2005 | AE        | 9/30-10/31  | 5                  | 0                     | 5              | -         | 5       | 8           | 0       | 0     | 0   | 0    | 0     | 0            |
| 5A                  |    | 2004 | B         | 9/17-9/30   | 80                 | 1003                  | 94             | 8.8       | 88      | 572         | 44      | 0     | 0   | 0    | 44    | 50           |
| 5A                  |    | 2005 | B         | 9/16-9/29   | 145                | 1023                  | 145            | 9.9       | 145     | 1100        | 78      | 3     | 0   | 0    | 81    | 56           |
| 5A                  |    | 2006 | B         | 9/22-10/05  | 90                 | 949                   | 90             | 7.3       | 90      | 734         | 35      | 0     | 0   | 0    | 35    | 39           |
| 5A                  |    | 2007 | B         | 9/14-9/27   | 140                | 1164                  | 140            | 9.5       | 138     | 1126        | 28      | 2     | 0   | 0    | 30    | 22           |
| 5A                  |    | 2008 | B         | 9/12-9/25   | 110                | 911                   | 110            | 10.3      | 107     | 868         | 49      | 0     | 0   | 0    | 49    | 46           |
| 5A                  |    | 2008 | B         | 11/14-11/27 | 25                 | 2                     | 25             | 100.0     | 22      | 150         | 3       | 0     | 0   | 0    | 3     | 14           |
| 5A                  |    | 2004 | ALS       | 9/17-9/30   | 250                | 176                   | 250            | 36.9      | 241     | 1591        | 0       | 0     | 82  | 7    | 89    | 37           |
| 5A                  |    | 2005 | ALS       | 9/16-9/29   | 300                | 160                   | 300            | 65.6      | 283     | 1842        | 0       | 0     | 94  | 11   | 105   | 37           |
| 5A                  |    | 2006 | ALS       | 9/22-10/05  | 220                | 166                   | 220            | 48.2      | 216     | 1354        | 0       | 0     | 72  | 2    | 74    | 34           |
| 5A                  |    | 2007 | ALS       | 9/14-9/27   | 200                | 158                   | 200            | 35.4      | 195     | 1332        | 0       | 0     | 60  | 2    | 62    | 32           |
| 5A                  |    | 2008 | ALS       | 9/12-9/25   | 135                | 121                   | 135            | 37.2      | 128     | 919         | 0       | 0     | 17  | 0    | 17    | 13           |
| 5BN                 |    | 2004 | B         | 9/17-9/30   | 200                | 944                   | 215            | 15.0      | 209     | 1707        | 48      | 0     | 0   | 0    | 48    | 23           |
| 5BN                 |    | 2005 | B         | 9/16-9/29   | 200                | 858                   | 200            | 14.8      | 195     | 1674        | 57      | 7     | 0   | 0    | 64    | 33           |
| 5BN                 |    | 2006 | B         | 9/22-10/05  | 200                | 1030                  | 200            | 11.3      | 198     | 1490        | 64      | 4     | 0   | 0    | 68    | 34           |
| 5BN                 |    | 2007 | B         | 9/14-9/27   | 125                | 797                   | 125            | 11.9      | 123     | 1039        | 31      | 2     | 0   | 0    | 33    | 27           |
| 5BN                 |    | 2008 | B         | 9/12-9/25   | 175                | 797                   | 174            | 13.9      | 172     | 1484        | 69      | 2     | 0   | 0    | 71    | 41           |
| 5BN                 |    | 2008 | B         | 11/14-11/27 | 25                 | 7                     | 25             | 100.0     | 25      | 180         | 2       | 2     | 0   | 0    | 4     | 16           |
| 5BN                 |    | 2004 | ALS       | 9/17-9/30   | 175                | 56                    | 175            | 69.6      | 163     | 1126        | 0       | 0     | 25  | 2    | 27    | 17           |
| 5BN                 |    | 2005 | ALS       | 9/16-9/29   | 250                | 99                    | 250            | 69.7      | 240     | 1697        | 0       | 0     | 47  | 4    | 51    | 21           |
| 5BN                 |    | 2006 | ALS       | 9/22-10/05  | 200                | 71                    | 200            | 74.6      | 196     | 1301        | 0       | 0     | 46  | 2    | 48    | 24           |
| 5BN                 |    | 2007 | ALS       | 9/14-9/27   | 100                | 55                    | 100            | 38.2      | 98      | 774         | 0       | 0     | 21  | 0    | 21    | 21           |
| 5BN                 |    | 2008 | ALS       | 9/12-9/25   | 100                | 33                    | 100            | 42.4      | 100     | 815         | 0       | 0     | 15  | 0    | 15    | 15           |
| 5BS                 |    | 2004 | B         | 9/17-9/30   | 125                | 1389                  | 133            | 7.7       | 133     | 956         | 51      | 2     | 0   | 0    | 53    | 40           |
| 5BS                 |    | 2005 | B         | 9/16-9/29   | 150                | 1450                  | 150            | 8.4       | 150     | 1104        | 84      | 12    | 0   | 0    | 96    | 64           |
| 5BS                 |    | 2006 | B         | 9/22-10/05  | 195                | 1742                  | 195            | 8.6       | 193     | 1581        | 59      | 4     | 0   | 0    | 63    | 33           |
| 5BS                 |    | 2007 | B         | 9/14-9/27   | 200                | 2111                  | 200            | 7.8       | 197     | 1381        | 87      | 3     | 0   | 0    | 90    | 46           |
| 5BS                 |    | 2008 | B         | 9/12-9/25   | 200                | 1796                  | 200            | 8.7       | 197     | 1781        | 74      | 2     | 0   | 0    | 76    | 39           |
| 5BS                 |    | 2008 | B         | 11/14-11/27 | 25                 | 20                    | 25             | 30.0      | 25      | 205         | 5       | 0     | 0   | 0    | 5     | 20           |
| 5BS                 |    | 2004 | ALS       | 9/17-9/30   | 250                | 246                   | 250            | 29.3      | 250     | 1622        | 0       | 0     | 92  | 2    | 94    | 38           |
| 5BS                 |    | 2005 | ALS       | 9/16-9/29   | 350                | 217                   | 350            | 44.7      | 343     | 2161        | 0       | 0     | 137 | 7    | 144   | 42           |
| 5BS                 |    | 2006 | ALS       | 9/22-10/05  | 360                | 291                   | 359            | 33.7      | 348     | 2290        | 0       | 0     | 102 | 9    | 111   | 32           |
| 5BS                 |    | 2007 | ALS       | 9/14-9/27   | 200                | 192                   | 200            | 27.6      | 198     | 1337        | 0       | 0     | 48  | 4    | 52    | 26           |
| 5BS                 |    | 2008 | ALS       | 9/12-9/25   | 200                | 178                   | 200            | 32.6      | 193     | 1424        | 0       | 0     | 43  | 0    | 43    | 22           |
| 6A                  |    | 2008 | B         | 11/21-11/27 | 25                 | 17                    | 25             | 35.3      | 25      | 118         | 3       | 0     | 0   | 0    | 3     | 12           |
| 6A/19A/21           | VV | 2007 | ALSS      | 9/14-9/27   | 30                 | 0                     | 30             | -         | 28      | 173         | 0       | 0     | 2   | 2    | 4     | 14           |
| 6A/19A/21           | VV | 2004 | ALS       | 9/17-9/30   | 10                 | 0                     | 10             | -         | 7       | 17          | 0       | 0     | 0   | 0    | 0     | 0            |
| 6A/19A/21           | VV | 2005 | ALS       | 9/16-9/29   | 20                 | 0                     | 20             | -         | 16      | 78          | 0       | 0     | 0   | 0    | 0     | 0            |
| 6A/19A/21           | VV | 2006 | ALS       | 9/22-10/05  | 20                 | 0                     | 20             | -         | 17      | 94          | 0       | 0     | 0   | 3    | 3     | 18           |
| 6A/19A/21           | VV | 2004 | AE        | 9/17-9/30   | 5                  | 11                    | 5              | 18.2      | 5       | 40          | 1       | 0     | 0   | 0    | 1     | 20           |
| 6A/19A/21           | VV | 2005 | AE        | 9/16-9/29   | 10                 | 3                     | 10             | 100.0     | 10      | 82          | 3       | 0     | 0   | 0    | 3     | 30           |
| 6A/19A/21           | VV | 2006 | AE        | 9/22-10/05  | 15                 | 27                    | 15             | 29.6      | 15      | 95          | 1       | 0     | 0   | 0    | 1     | 7            |
| 6A/19A/21           | VV | 2007 | AE        | 9/14-9/27   | 15                 | 16                    | 15             | 43.8      | 15      | 113         | 4       | 0     | 4   | 0    | 8     | 53           |
| 6AN                 |    | 2004 | B         | 9/17-9/30   | 80                 | 791                   | 91             | 8.5       | 91      | 728         | 33      | 4     | 0   | 0    | 37    | 41           |

BE = Early Bull    B = Bull    ALS = Antlerless    AE = Any Elk    CN = Camp Navajo    CH = CHAMP Hunt    DV = Disabled Veteran

# Elk Hunt Data

## 5-Year: 2004-2008 Harvest

| Unit                | Year | Hunt Type | Dates       | Permits Authorized | 1st Choice Applicants | Permits Issued | Draw Odds | Hunters | Hunter Days | Harvest |       |     |      |       | Hunt Success |
|---------------------|------|-----------|-------------|--------------------|-----------------------|----------------|-----------|---------|-------------|---------|-------|-----|------|-------|--------------|
|                     |      |           |             |                    |                       |                |           |         |             | Bull    | Spike | Cow | Calf | Total |              |
| ARCHERY (continued) |      |           |             |                    |                       |                |           |         |             |         |       |     |      |       |              |
| 6AN                 | 2005 | B         | 9/16-9/29   | 100                | 995                   | 100            | 8.1       | 100     | 718         | 46      | 0     | 0   | 0    | 46    | 46           |
| 6AN                 | 2006 | B         | 9/22-10/05  | 115                | 1062                  | 115            | 8.9       | 115     | 920         | 40      | 2     | 0   | 0    | 42    | 37           |
| 6AN                 | 2007 | B         | 9/14-9/27   | 115                | 1233                  | 115            | 7.9       | 115     | 846         | 49      | 5     | 0   | 0    | 54    | 47           |
| 6AN                 | 2008 | B         | 9/12-9/25   | 150                | 1074                  | 150            | 11.3      | 146     | 1311        | 65      | 2     | 0   | 0    | 67    | 46           |
| 6AN                 | 2004 | ALS       | 9/17-9/30   | 240                | 187                   | 240            | 49.7      | 236     | 1484        | 0       | 0     | 38  | 4    | 42    | 18           |
| 6AN                 | 2005 | ALS       | 9/16-9/29   | 390                | 183                   | 390            | 62.8      | 371     | 2359        | 0       | 0     | 107 | 4    | 111   | 30           |
| 6AN                 | 2006 | ALS       | 9/22-10/05  | 450                | 227                   | 450            | 61.2      | 438     | 2880        | 0       | 0     | 99  | 2    | 101   | 23           |
| 6AN                 | 2007 | ALS       | 9/14-9/27   | 200                | 186                   | 199            | 31.2      | 193     | 1291        | 0       | 0     | 58  | 0    | 58    | 30           |
| 6AN                 | 2008 | ALS       | 9/12-9/25   | 200                | 188                   | 200            | 44.7      | 194     | 1301        | 0       | 0     | 39  | 2    | 41    | 21           |
| 6AS                 | 2004 | B         | 9/17-9/30   | 120                | 1036                  | 133            | 10.6      | 131     | 1079        | 33      | 4     | 0   | 0    | 37    | 28           |
| 6AS                 | 2005 | B         | 9/16-9/29   | 100                | 723                   | 100            | 11.5      | 100     | 752         | 30      | 6     | 0   | 0    | 36    | 36           |
| 6AS                 | 2006 | B         | 9/22-10/05  | 115                | 824                   | 115            | 6.8       | 113     | 816         | 32      | 6     | 0   | 0    | 38    | 34           |
| 6AS                 | 2007 | B         | 9/14-9/27   | 115                | 745                   | 115            | 12.1      | 115     | 944         | 37      | 2     | 0   | 0    | 39    | 34           |
| 6AS                 | 2008 | B         | 9/12-9/25   | 150                | 945                   | 150            | 12.1      | 148     | 1344        | 35      | 2     | 0   | 0    | 37    | 25           |
| 6AS                 | 2004 | ALS       | 9/17-9/30   | 250                | 156                   | 250            | 49.4      | 245     | 1540        | 0       | 0     | 54  | 5    | 59    | 24           |
| 6AS                 | 2005 | ALS       | 9/16-9/29   | 390                | 186                   | 390            | 83.9      | 384     | 2719        | 0       | 0     | 66  | 6    | 72    | 19           |
| 6AS                 | 2006 | ALS       | 9/22-10/05  | 450                | 192                   | 450            | 77.1      | 438     | 2924        | 0       | 0     | 65  | 0    | 65    | 15           |
| 6AS                 | 2007 | ALS       | 9/14-9/27   | 200                | 134                   | 197            | 50.0      | 186     | 1322        | 0       | 0     | 42  | 2    | 44    | 24           |
| 6AS                 | 2008 | ALS       | 9/12-9/25   | 175                | 140                   | 175            | 50.7      | 173     | 1176        | 0       | 0     | 29  | 2    | 31    | 18           |
| 6AW                 | 2004 | B         | 9/17-9/30   | 55                 | 303                   | 56             | 15.8      | 54      | 420         | 20      | 4     | 0   | 0    | 24    | 44           |
| 6AW                 | 2005 | B         | 9/16-9/29   | 50                 | 241                   | 50             | 11.6      | 50      | 424         | 14      | 4     | 0   | 0    | 18    | 36           |
| 6AW                 | 2006 | B         | 9/22-10/05  | 55                 | 217                   | 55             | 14.7      | 55      | 414         | 20      | 0     | 0   | 0    | 20    | 36           |
| 6AW                 | 2007 | B         | 9/14-9/27   | 55                 | 281                   | 55             | 14.6      | 54      | 412         | 11      | 0     | 0   | 0    | 11    | 20           |
| 6AW                 | 2008 | B         | 9/12-9/25   | 75                 | 243                   | 75             | 17.7      | 73      | 680         | 23      | 2     | 0   | 0    | 25    | 34           |
| 6AW                 | 2004 | ALS       | 9/17-9/30   | 50                 | 29                    | 50             | 72.4      | 50      | 335         | 0       | 0     | 25  | 5    | 30    | 60           |
| 6AW                 | 2005 | ALS       | 9/16-9/29   | 125                | 51                    | 125            | 60.8      | 122     | 934         | 0       | 0     | 30  | 0    | 30    | 25           |
| 6AW                 | 2006 | ALS       | 9/22-10/05  | 150                | 26                    | 150            | 100.0     | 147     | 1091        | 0       | 0     | 20  | 3    | 23    | 16           |
| 6AW                 | 2007 | ALS       | 9/14-9/27   | 50                 | 24                    | 50             | 54.2      | 50      | 403         | 0       | 0     | 9   | 0    | 9     | 18           |
| 6AW                 | 2008 | ALS       | 9/12-9/25   | 50                 | 16                    | 50             | 68.8      | 47      | 420         | 0       | 0     | 16  | 0    | 16    | 34           |
| 6B                  | 2004 | B         | 9/17-9/30   | 50                 | 286                   | 50             | 12.9      | 50      | 341         | 19      | 2     | 0   | 0    | 21    | 42           |
| 6B                  | 2005 | B         | 9/16-9/29   | 65                 | 328                   | 65             | 12.8      | 63      | 506         | 16      | 2     | 0   | 0    | 18    | 29           |
| 6B                  | 2006 | B         | 9/22-10/05  | 80                 | 358                   | 80             | 15.1      | 80      | 676         | 24      | 2     | 0   | 0    | 26    | 33           |
| 6B                  | 2007 | B         | 9/14-9/27   | 100                | 417                   | 100            | 12.7      | 98      | 1000        | 17      | 0     | 0   | 0    | 17    | 17           |
| 6B                  | 2008 | B         | 9/12-9/25   | 100                | 299                   | 100            | 20.4      | 98      | 806         | 24      | 2     | 0   | 0    | 26    | 27           |
| 6B                  | 2008 | B         | 11/14-11/27 | 25                 | 5                     | 25             | 100.0     | 23      | 212         | 2       | 0     | 0   | 0    | 2     | 9            |
| 6B                  | 2004 | ALS       | 9/17-9/30   | 50                 | 42                    | 50             | 50.0      | 48      | 405         | 0       | 0     | 10  | 0    | 10    | 21           |
| 6B                  | 2005 | ALS       | 9/16-9/29   | 100                | 46                    | 100            | 71.7      | 98      | 781         | 0       | 0     | 28  | 2    | 30    | 31           |
| 6B                  | 2006 | ALS       | 9/22-10/05  | 100                | 42                    | 100            | 54.8      | 95      | 639         | 0       | 0     | 24  | 0    | 24    | 25           |
| 6B                  | 2007 | ALS       | 9/14-9/27   | 100                | 32                    | 95             | 75.0      | 91      | 656         | 0       | 0     | 13  | 2    | 15    | 16           |
| 6B                  | 2008 | ALS       | 9/12-9/25   | 100                | 78                    | 100            | 46.2      | 96      | 758         | 0       | 0     | 10  | 0    | 10    | 10           |
| 7E                  | 2004 | B         | 9/17-9/30   | 115                | 317                   | 138            | 23.0      | 136     | 1219        | 41      | 0     | 0   | 0    | 41    | 30           |
| 7E                  | 2005 | B         | 9/16-9/29   | 115                | 507                   | 115            | 18.9      | 115     | 995         | 38      | 2     | 0   | 0    | 40    | 35           |
| 7E                  | 2006 | B         | 9/22-10/05  | 100                | 435                   | 100            | 12.9      | 96      | 814         | 29      | 4     | 0   | 0    | 33    | 34           |
| 7E                  | 2007 | B         | 9/14-9/27   | 120                | 486                   | 120            | 11.9      | 120     | 1093        | 36      | 0     | 0   | 0    | 36    | 30           |
| 7E                  | 2008 | B         | 9/12-9/25   | 130                | 357                   | 130            | 20.4      | 130     | 1226        | 38      | 0     | 0   | 0    | 38    | 29           |
| 7E                  | 2008 | B         | 11/14-11/27 | 25                 | 12                    | 25             | 91.7      | 20      | 148         | 2       | 0     | 0   | 0    | 2     | 10           |
| 7E                  | 2004 | ALS       | 9/17-9/30   | 175                | 53                    | 175            | 100.0     | 171     | 1138        | 0       | 0     | 19  | 0    | 19    | 11           |
| 7E                  | 2005 | ALS       | 9/16-9/29   | 235                | 50                    | 235            | 100.0     | 228     | 1598        | 0       | 0     | 36  | 2    | 38    | 17           |
| 7E                  | 2006 | ALS       | 9/22-10/05  | 150                | 58                    | 150            | 100.0     | 146     | 848         | 0       | 0     | 35  | 2    | 37    | 25           |
| 7E                  | 2007 | ALS       | 9/14-9/27   | 75                 | 35                    | 75             | 42.9      | 70      | 498         | 0       | 0     | 13  | 2    | 15    | 21           |
| 7E                  | 2008 | ALS       | 9/12-9/25   | 75                 | 36                    | 75             | 66.7      | 75      | 489         | 0       | 0     | 11  | 2    | 13    | 17           |
| 7M                  | 2004 | B         | 9/17-9/30   | 80                 | 341                   | 97             | 19.4      | 92      | 748         | 25      | 9     | 0   | 0    | 34    | 37           |
| 7M                  | 2004 | B         | 10/01-10/14 | 80                 | 235                   | 95             | 25.1      | 95      | 896         | 22      | 0     | 0   | 0    | 22    | 23           |
| 7M                  | 2005 | B         | 9/16-9/29   | 80                 | 320                   | 80             | 17.2      | 75      | 650         | 13      | 2     | 0   | 0    | 15    | 20           |
| 7M                  | 2005 | B         | 9/30-10/13  | 80                 | 144                   | 80             | 27.1      | 80      | 702         | 12      | 6     | 0   | 0    | 18    | 23           |
| 7M                  | 2004 | ALS       | 9/17-9/30   | 80                 | 30                    | 80             | 100.0     | 78      | 525         | 0       | 0     | 14  | 2    | 16    | 21           |
| 7M                  | 2004 | ALS       | 10/01-10/14 | 80                 | 12                    | 80             | 100.0     | 80      | 628         | 0       | 0     | 12  | 2    | 14    | 18           |
| 7M                  | 2005 | ALS       | 9/16-9/29   | 80                 | 38                    | 80             | 65.8      | 80      | 595         | 0       | 0     | 28  | 0    | 28    | 35           |
| 7M                  | 2005 | ALS       | 9/30-10/13  | 80                 | 21                    | 80             | 100.0     | 70      | 480         | 0       | 0     | 14  | 0    | 14    | 20           |
| 7W                  | 2004 | B         | 9/17-9/30   | 155                | 831                   | 171            | 12.0      | 169     | 1520        | 58      | 0     | 0   | 0    | 58    | 34           |
| 7W                  | 2005 | B         | 9/16-9/29   | 150                | 717                   | 150            | 14.4      | 150     | 1138        | 84      | 2     | 0   | 0    | 86    | 57           |

BE = Early Bull    B = Bull    ALS = Antlerless    AE = Any Elk    CN = Camp Navajo    CH = CHAMP Hunt    DV = Disabled Veteran

### Herd-Units:

CC = Canyon Creek    HM = Hutch Mtn.    MM = Melatone Mesa    SM = East Sunset/West Sunset/Meteor Crater    WI = Winslow  
ES (Unit 1) = Escudilla    M = Martinez    MZ = Mazatzal    TT = Twin Arrows/Two Guns/Grapevine    WS (17/20A/20C) = Williamson  
GV = Grapevine    ML = Marshall Lake    RV = Round Valley    VV = Verde Valley    Valley/Skull Valley/Kirkland Junction

# Elk Hunt Data

## 5-Year: 2004-2008 Harvest

| Unit                      |  | Year | Hunt Type | Dates       | Permits Authorized | 1st Choice Applicants | Permits Issued | Draw Odds | Hunters | Hunter Days | Harvest |       |     |      |       | Hunt Success |
|---------------------------|--|------|-----------|-------------|--------------------|-----------------------|----------------|-----------|---------|-------------|---------|-------|-----|------|-------|--------------|
|                           |  |      |           |             |                    |                       |                |           |         |             | Bull    | Spike | Cow | Calf | Total |              |
| ARCHERY (continued)       |  |      |           |             |                    |                       |                |           |         |             |         |       |     |      |       |              |
| 7W                        |  | 2006 | B         | 9/22-10/05  | 150                | 1097                  | 150            | 9.3       | 150     | 1278        | 51      | 0     | 0   | 0    | 51    | 34           |
| 7W                        |  | 2007 | B         | 9/14-9/27   | 150                | 1086                  | 150            | 9.0       | 148     | 1317        | 38      | 5     | 0   | 0    | 43    | 29           |
| 7W                        |  | 2008 | B         | 9/12-9/25   | 150                | 844                   | 150            | 12.1      | 150     | 1352        | 72      | 0     | 0   | 0    | 72    | 48           |
| 7W                        |  | 2008 | B         | 11/14-11/27 | 25                 | 14                    | 25             | 78.6      | 25      | 163         | 3       | 0     | 0   | 0    | 3     | 12           |
| 7W                        |  | 2004 | ALS       | 9/17-9/30   | 100                | 53                    | 100            | 50.9      | 98      | 628         | 0       | 0     | 18  | 5    | 23    | 23           |
| 7W                        |  | 2005 | ALS       | 9/16-9/29   | 250                | 74                    | 250            | 97.3      | 241     | 1635        | 0       | 0     | 41  | 11   | 52    | 22           |
| 7W                        |  | 2006 | ALS       | 9/22-10/05  | 225                | 85                    | 225            | 52.9      | 221     | 1417        | 0       | 0     | 61  | 0    | 61    | 28           |
| 7W                        |  | 2007 | ALS       | 9/14-9/27   | 100                | 60                    | 100            | 41.7      | 96      | 683         | 0       | 0     | 9   | 4    | 13    | 14           |
| 7W                        |  | 2008 | ALS       | 9/12-9/25   | 75                 | 40                    | 75             | 35.0      | 70      | 503         | 0       | 0     | 12  | 0    | 12    | 17           |
| 8                         |  | 2004 | B         | 9/17-9/30   | 100                | 573                   | 127            | 12.0      | 127     | 1030        | 53      | 0     | 0   | 0    | 53    | 42           |
| 8                         |  | 2005 | B         | 9/16-9/29   | 100                | 734                   | 100            | 7.9       | 100     | 931         | 43      | 0     | 0   | 0    | 43    | 43           |
| 8                         |  | 2006 | B         | 9/22-10/05  | 125                | 739                   | 125            | 9.9       | 125     | 1201        | 45      | 4     | 0   | 0    | 49    | 39           |
| 8                         |  | 2007 | B         | 9/14-9/27   | 125                | 878                   | 125            | 8.2       | 125     | 1330        | 23      | 2     | 0   | 0    | 25    | 20           |
| 8                         |  | 2008 | B         | 9/12-9/25   | 125                | 677                   | 125            | 12.0      | 122     | 1130        | 42      | 9     | 0   | 0    | 51    | 42           |
| 8                         |  | 2008 | B         | 11/14-11/27 | 25                 | 10                    | 25             | 70.0      | 23      | 139         | 5       | 2     | 0   | 0    | 7     | 30           |
| 8                         |  | 2006 | ALS       | 9/22-10/05  | 50                 | 14                    | 50             | 85.7      | 50      | 410         | 0       | 0     | 12  | 2    | 14    | 28           |
| 8                         |  | 2007 | ALS       | 9/14-9/27   | 50                 | 32                    | 50             | 18.8      | 50      | 396         | 0       | 0     | 13  | 0    | 13    | 26           |
| 8                         |  | 2008 | ALS       | 9/12-9/25   | 50                 | 9                     | 50             | 100.0     | 50      | 330         | 0       | 0     | 16  | 0    | 16    | 32           |
| 9                         |  | 2004 | B         | 9/17-9/30   | 90                 | 2613                  | 123            | 4.4       | 120     | 943         | 72      | 0     | 0   | 0    | 72    | 60           |
| 9                         |  | 2005 | B         | 9/16-9/29   | 100                | 2835                  | 100            | 3.2       | 100     | 674         | 82      | 0     | 0   | 0    | 82    | 82           |
| 9                         |  | 2006 | B         | 9/22-10/05  | 75                 | 2885                  | 75             | 2.4       | 75      | 646         | 53      | 1     | 0   | 0    | 54    | 72           |
| 9                         |  | 2007 | B         | 9/14-9/27   | 75                 | 3314                  | 75             | 1.7       | 75      | 572         | 51      | 0     | 0   | 0    | 51    | 68           |
| 9                         |  | 2008 | B         | 9/12-9/25   | 75                 | 2651                  | 74             | 2.5       | 74      | 584         | 54      | 0     | 0   | 0    | 54    | 73           |
| 9                         |  | 2008 | B         | 11/14-11/27 | 25                 | 47                    | 25             | 34.0      | 23      | 203         | 5       | 0     | 0   | 0    | 5     | 22           |
| 10                        |  | 2004 | B         | 9/17-9/30   | 150                | 1274                  | 177            | 9.2       | 171     | 1338        | 89      | 0     | 0   | 0    | 89    | 52           |
| 10                        |  | 2005 | B         | 9/16-9/29   | 150                | 1060                  | 151            | 7.1       | 149     | 1023        | 99      | 0     | 0   | 0    | 99    | 66           |
| 10                        |  | 2006 | B         | 9/22-10/05  | 125                | 1664                  | 125            | 4.7       | 122     | 959         | 56      | 0     | 0   | 0    | 56    | 46           |
| 10                        |  | 2007 | B         | 9/14-9/27   | 150                | 1845                  | 150            | 3.8       | 150     | 1403        | 36      | 0     | 0   | 0    | 36    | 24           |
| 10                        |  | 2008 | B         | 9/12-9/25   | 150                | 1052                  | 150            | 8.3       | 148     | 1359        | 50      | 0     | 0   | 0    | 50    | 34           |
| 10                        |  | 2008 | B         | 11/14-11/27 | 25                 | 16                    | 25             | 75.0      | 23      | 183         | 4       | 0     | 0   | 0    | 4     | 17           |
| 10                        |  | 2004 | ALS       | 9/17-9/30   | 100                | 33                    | 100            | 75.8      | 94      | 704         | 0       | 0     | 4   | 0    | 4     | 4            |
| 10                        |  | 2005 | ALS       | 9/16-9/29   | 100                | 17                    | 100            | 100.0     | 90      | 523         | 0       | 0     | 21  | 2    | 23    | 26           |
| 10                        |  | 2006 | ALS       | 9/22-10/05  | 100                | 42                    | 94             | 54.8      | 90      | 651         | 0       | 0     | 4   | 0    | 4     | 4            |
| 10                        |  | 2007 | ALS       | 9/14-9/27   | 75                 | 18                    | 72             | 88.9      | 62      | 497         | 0       | 0     | 10  | 0    | 10    | 16           |
| 10                        |  | 2008 | ALS       | 9/12-9/25   | 75                 | 56                    | 75             | 60.7      | 72      | 431         | 0       | 0     | 3   | 0    | 3     | 4            |
| 11M                       |  | 2006 | B         | 9/22-10/05  | 80                 | 317                   | 80             | 17.0      | 80      | 744         | 27      | 0     | 0   | 0    | 27    | 34           |
| 11M                       |  | 2006 | B         | 10/06-10/19 | 80                 | 107                   | 80             | 22.4      | 80      | 752         | 9       | 2     | 0   | 0    | 11    | 14           |
| 11M                       |  | 2007 | B         | 9/14-9/27   | 80                 | 399                   | 80             | 13.8      | 80      | 697         | 18      | 2     | 0   | 0    | 20    | 25           |
| 11M                       |  | 2007 | B         | 9/28-10/11  | 80                 | 139                   | 80             | 20.1      | 80      | 640         | 24      | 2     | 0   | 0    | 26    | 33           |
| 11M                       |  | 2008 | B         | 9/12-9/25   | 80                 | 253                   | 80             | 20.6      | 80      | 796         | 22      | 6     | 0   | 0    | 28    | 35           |
| 11M                       |  | 2008 | B         | 9/26-10/09  | 80                 | 158                   | 80             | 20.9      | 80      | 790         | 16      | 0     | 0   | 0    | 16    | 20           |
| 11M                       |  | 2006 | ALS       | 9/22-10/05  | 80                 | 41                    | 80             | 70.7      | 80      | 535         | 0       | 0     | 25  | 0    | 25    | 31           |
| 11M                       |  | 2006 | ALS       | 10/06-10/19 | 80                 | 9                     | 80             | 100.0     | 77      | 562         | 0       | 0     | 10  | 0    | 10    | 13           |
| 11M                       |  | 2007 | ALS       | 9/14-9/27   | 80                 | 43                    | 79             | 72.1      | 77      | 511         | 0       | 0     | 15  | 5    | 20    | 26           |
| 11M                       |  | 2007 | ALS       | 9/28-10/11  | 80                 | 13                    | 79             | 100.0     | 77      | 656         | 0       | 0     | 16  | 0    | 16    | 21           |
| 11M                       |  | 2008 | ALS       | 9/12-9/25   | 80                 | 55                    | 80             | 74.5      | 71      | 631         | 0       | 0     | 22  | 2    | 24    | 34           |
| 11M                       |  | 2008 | ALS       | 9/26-10/09  | 80                 | 31                    | 80             | 61.3      | 80      | 517         | 0       | 0     | 22  | 6    | 28    | 35           |
| 15A/15B/17A/18/19B        |  | 2004 | ALS       | 9/17-9/30   | 25                 | 3                     | 25             | 100.0     | 25      | 211         | 0       | 0     | 2   | 0    | 2     | 8            |
| 15A/15B/17A/18/19B        |  | 2005 | ALS       | 9/16-9/30   | 35                 | 5                     | 35             | 100.0     | 33      | 208         | 0       | 0     | 2   | 0    | 2     | 6            |
| 15A/15B/17A/18/19B        |  | 2004 | AE        | 9/17-9/30   | 25                 | 78                    | 25             | 20.5      | 23      | 148         | 8       | 0     | 0   | 0    | 8     | 35           |
| 15A/15B/17A/18/19B        |  | 2005 | AE        | 9/16-9/29   | 35                 | 104                   | 35             | 18.3      | 35      | 228         | 15      | 3     | 0   | 0    | 18    | 51           |
| 15A/15B/17/18/19B/20A/20C |  | 2008 | B         | 9/12-9/25   | 75                 | 90                    | 75             | 24.4      | 70      | 532         | 35      | 0     | 0   | 0    | 35    | 50           |
| 15A/15B/17/18/19B/20A/20C |  | 2006 | ALS       | 9/22-10/05  | 75                 | 8                     | 75             | 100.0     | 70      | 458         | 0       | 0     | 0   | 0    | 0     | 0            |
| 15A/15B/17/18/19B/20A/20C |  | 2007 | ALS       | 9/14-9/27   | 75                 | 7                     | 76             | 100.0     | 61      | 398         | 0       | 0     | 3   | 0    | 3     | 5            |
| 15A/15B/17/18/19B/20A/20C |  | 2008 | ALS       | 9/12-9/25   | 75                 | 2                     | 75             | 100.0     | 60      | 363         | 0       | 0     | 2   | 0    | 2     | 3            |
| 15A/15B/17/18/19B/20A/20C |  | 2006 | AE        | 9/22-10/05  | 75                 | 163                   | 75             | 27.6      | 66      | 398         | 23      | 0     | 0   | 0    | 23    | 35           |
| 15A/15B/17/18/19B/20A/20C |  | 2007 | AE        | 9/14-9/27   | 75                 | 141                   | 75             | 19.1      | 75      | 618         | 26      | 0     | 0   | 0    | 26    | 35           |
| 16A                       |  | 2004 | B         | 9/17-9/30   | 3                  | 20                    | 6              | 30.0      | 6       | 33          | 3       | 3     | 0   | 0    | 6     | 100          |
| 16A                       |  | 2005 | B         | 9/16-9/29   | 4                  | 26                    | 4              | 11.5      | 4       | 4           | 0       | 4     | 0   | 0    | 4     | 100          |

BE = Early Bull    B = Bull    ALS = Antlerless    AE = Any Elk    CN = Camp Navajo    CH = CHAMP Hunt    DV = Disabled Veteran

# Elk Hunt Data

## 5-Year: 2004-2008 Harvest

| Unit                | Year | Hunt Type | Dates       | Permits Authorized | 1st Choice Applicants | Permits Issued | Draw Odds | Hunters | Hunter Days | Harvest |       |     |      |       | Hunt Success |
|---------------------|------|-----------|-------------|--------------------|-----------------------|----------------|-----------|---------|-------------|---------|-------|-----|------|-------|--------------|
|                     |      |           |             |                    |                       |                |           |         |             | Bull    | Spike | Cow | Calf | Total |              |
| ARCHERY (continued) |      |           |             |                    |                       |                |           |         |             |         |       |     |      |       |              |
| 16A                 | 2006 | B         | 9/22-10/05  | 4                  | 14                    | 4              | 14.3      | 4       | 12          | 1       | 0     | 0   | 0    | 1     | 25           |
| 16A                 | 2007 | B         | 9/14-9/27   | 4                  | 8                     | 4              | 37.5      | 4       | 26          | 0       | 4     | 0   | 0    | 4     | 100          |
| 16A                 | 2008 | B         | 9/12-9/25   | 4                  | 17                    | 4              | 5.9       | 4       | 20          | 1       | 0     | 0   | 0    | 1     | 25           |
| 19A                 | 2004 | B         | 9/17-9/30   | 15                 | 62                    | 15             | 17.7      | 13      | 117         | 10      | 0     | 0   | 0    | 10    | 77           |
| 19A                 | 2005 | B         | 9/16-9/29   | 15                 | 81                    | 15             | 12.3      | 14      | 120         | 8       | 0     | 0   | 0    | 8     | 57           |
| 19A                 | 2006 | B         | 9/22-10/05  | 20                 | 55                    | 20             | 18.2      | 20      | 171         | 9       | 0     | 0   | 0    | 9     | 45           |
| 19A                 | 2007 | B         | 9/14-9/27   | 20                 | 97                    | 20             | 11.3      | 20      | 171         | 2       | 2     | 0   | 0    | 4     | 20           |
| 19A                 | 2008 | B         | 9/12-9/25   | 20                 | 40                    | 20             | 35.0      | 20      | 184         | 5       | 0     | 0   | 0    | 5     | 25           |
| 22                  | 2004 | B         | 11/12-11/25 | 160                | 238                   | 160            | 39.5      | 158     | 1137        | 22      | 5     | 0   | 0    | 27    | 17           |
| 22                  | 2008 | B         | 9/12-9/25   | 25                 | 205                   | 25             | 7.8       | 25      | 137         | 17      | 0     | 0   | 0    | 17    | 68           |
| 22                  | 2004 | ALS       | 11/19-12/02 | 85                 | 27                    | 85             | 85.2      | 85      | 500         | 0       | 0     | 13  | 3    | 16    | 19           |
| 22                  | 2005 | ALS       | 11/18-12/01 | 85                 | 26                    | 85             | 80.8      | 85      | 651         | 0       | 0     | 21  | 4    | 25    | 29           |
| 22                  | 2006 | ALS       | 11/17-11/30 | 100                | 38                    | 99             | 73.7      | 96      | 608         | 0       | 0     | 11  | 6    | 17    | 18           |
| 22                  | 2007 | ALS       | 11/16-11/29 | 50                 | 14                    | 50             | 78.6      | 50      | 340         | 0       | 0     | 16  | 0    | 16    | 32           |
| 22                  | 2008 | ALS       | 11/14-11/27 | 70                 | 15                    | 70             | 100.0     | 64      | 443         | 0       | 0     | 19  | 4    | 23    | 36           |
| 22N                 | 2005 | B         | 11/11-11/24 | 185                | 195                   | 185            | 46.7      | 180     | 1326        | 49      | 13    | 0   | 0    | 62    | 34           |
| 22N                 | 2006 | B         | 11/10-11/23 | 200                | 238                   | 200            | 44.5      | 197     | 1397        | 46      | 9     | 0   | 0    | 55    | 28           |
| 22N                 | 2007 | B         | 11/09-11/22 | 220                | 228                   | 219            | 42.1      | 210     | 1609        | 34      | 11    | 0   | 0    | 45    | 21           |
| 22N                 | 2008 | B         | 11/14-11/27 | 300                | 172                   | 300            | 79.7      | 281     | 2045        | 42      | 11    | 0   | 0    | 53    | 19           |
| 22S                 | 2004 | B         | 9/24-10/07  | 50                 | 113                   | 50             | 28.3      | 50      | 400         | 15      | 0     | 0   | 0    | 15    | 30           |
| 22S                 | 2005 | B         | 11/11-11/24 | 50                 | 5                     | 50             | 100.0     | 48      | 363         | 2       | 0     | 0   | 0    | 2     | 4            |
| 22S                 | 2006 | B         | 11/10-11/23 | 20                 | 19                    | 20             | 57.9      | 20      | 175         | 0       | 0     | 0   | 0    | 0     | 0            |
| 22S                 | 2007 | B         | 11/09-11/22 | 30                 | 26                    | 29             | 76.9      | 26      | 119         | 10      | 0     | 0   | 0    | 10    | 38           |
| 22S                 | 2008 | B         | 11/14-11/27 | 30                 | 17                    | 30             | 100.0     | 30      | 220         | 5       | 8     | 0   | 0    | 13    | 43           |
| 23                  | 2004 | B         | 11/12-11/25 | 125                | 122                   | 125            | 52.5      | 125     | 915         | 21      | 0     | 0   | 0    | 21    | 17           |
| 23                  | 2005 | B         | 11/11-11/24 | 150                | 186                   | 150            | 43.0      | 150     | 1160        | 12      | 5     | 0   | 0    | 17    | 11           |
| 23                  | 2006 | B         | 11/10-11/23 | 150                | 142                   | 150            | 52.8      | 150     | 1133        | 22      | 10    | 0   | 0    | 32    | 21           |
| 23                  | 2007 | B         | 11/09-11/22 | 150                | 154                   | 150            | 41.6      | 130     | 936         | 18      | 3     | 0   | 0    | 21    | 16           |
| 23                  | 2008 | B         | 11/07-11/20 | 150                | 118                   | 150            | 62.7      | 144     | 1082        | 21      | 2     | 0   | 0    | 23    | 16           |
| 23                  | 2004 | ALS       | 11/19-12/02 | 100                | 15                    | 100            | 100.0     | 95      | 481         | 0       | 0     | 11  | 3    | 14    | 15           |
| 23                  | 2005 | ALS       | 11/18-12/01 | 100                | 25                    | 100            | 100.0     | 95      | 603         | 0       | 0     | 15  | 0    | 15    | 16           |
| 23                  | 2006 | ALS       | 11/17-11/30 | 100                | 24                    | 100            | 100.0     | 97      | 621         | 0       | 0     | 24  | 0    | 24    | 25           |
| 23                  | 2007 | ALS       | 11/16-11/29 | 100                | 18                    | 98             | 100.0     | 95      | 552         | 0       | 0     | 10  | 0    | 10    | 11           |
| 23                  | 2008 | ALS       | 11/14-11/27 | 100                | 14                    | 100            | 100.0     | 97      | 605         | 0       | 0     | 26  | 3    | 29    | 30           |
| 23N                 | 2008 | B         | 9/12-9/25   | 15                 | 594                   | 15             | 2.2       | 15      | 135         | 8       | 0     | 0   | 0    | 8     | 53           |
| 23S                 | 2005 | B         | 9/23-10/06  | 25                 | 212                   | 25             | 9.0       | 24      | 165         | 13      | 0     | 0   | 0    | 13    | 54           |
| 23S                 | 2007 | B         | 9/14-9/27   | 35                 | 438                   | 35             | 4.1       | 35      | 223         | 28      | 0     | 0   | 0    | 28    | 80           |
| 23S                 | 2008 | B         | 9/12-9/25   | 15                 | 102                   | 15             | 8.8       | 14      | 112         | 7       | 0     | 0   | 0    | 7     | 50           |
| 27                  | 2004 | B         | 9/17-9/30   | 100                | 925                   | 121            | 7.6       | 121     | 1064        | 47      | 0     | 0   | 0    | 47    | 39           |
| 27                  | 2005 | B         | 9/16-9/29   | 100                | 834                   | 100            | 6.2       | 97      | 800         | 42      | 2     | 0   | 0    | 44    | 45           |
| 27                  | 2006 | B         | 9/22-10/05  | 100                | 850                   | 100            | 7.4       | 100     | 824         | 43      | 2     | 0   | 0    | 45    | 45           |
| 27                  | 2007 | B         | 9/14-9/27   | 100                | 883                   | 100            | 7.0       | 97      | 838         | 39      | 2     | 0   | 0    | 41    | 42           |
| 27                  | 2008 | B         | 9/12-9/25   | 150                | 960                   | 150            | 9.9       | 146     | 1357        | 60      | 0     | 0   | 0    | 60    | 41           |
| 27                  | 2008 | B         | 11/14-11/27 | 25                 | 40                    | 25             | 30.0      | 19      | 183         | 0       | 0     | 0   | 0    | 0     | 0            |
| 27                  | 2004 | ALS       | 9/17-9/30   | 100                | 55                    | 100            | 49.1      | 96      | 694         | 0       | 0     | 6   | 0    | 6     | 6            |
| 27                  | 2005 | ALS       | 9/16-9/29   | 175                | 31                    | 175            | 100.0     | 164     | 1126        | 0       | 0     | 20  | 4    | 24    | 15           |
| 27                  | 2006 | ALS       | 9/22-10/05  | 145                | 54                    | 145            | 66.7      | 136     | 805         | 0       | 0     | 21  | 2    | 23    | 17           |
| 27                  | 2007 | ALS       | 9/14-9/27   | 150                | 73                    | 146            | 58.9      | 132     | 907         | 0       | 0     | 20  | 0    | 20    | 15           |
| 27                  | 2008 | ALS       | 9/12-9/25   | 75                 | 52                    | 75             | 46.2      | 65      | 498         | 0       | 0     | 8   | 0    | 8     | 12           |
| 28                  | 2006 | AE        | 9/22-10/05  | 5                  | 12                    | 5              | 25.0      | 5       | 50          | 0       | 0     | 0   | 0    | 0     | 0            |
| 28                  | 2007 | AE        | 9/14-9/27   | 5                  | 13                    | 5              | 30.8      | 5       | 38          | 3       | 0     | 0   | 0    | 3     | 60           |
| 28                  | 2008 | AE        | 9/12-9/25   | 5                  | 4                     | 5              | 50.0      | 5       | 30          | 5       | 0     | 0   | 0    | 5     | 100          |
| 28/31               | 2004 | AE        | 9/17-9/30   | 5                  | 17                    | 5              | 23.5      | 5       | 15          | 3       | 0     | 0   | 0    | 3     | 60           |
| 28/31               | 2005 | AE        | 9/16-9/29   | 5                  | 8                     | 5              | 37.5      | 5       | 23          | 0       | 0     | 0   | 0    | 0     | 0            |
| 31/32               | 2006 | AE        | 9/22-10/05  | 5                  | 3                     | 5              | 66.7      | 3       | 25          | 0       | 0     | 0   | 0    | 0     | 0            |
| 31/32               | 2007 | AE        | 9/14-9/27   | 5                  | 3                     | 5              | 100.0     | 5       | 20          | 0       | 0     | 0   | 0    | 0     | 0            |
| 31/32               | 2008 | AE        | 9/12-9/25   | 5                  | 8                     | 5              | 37.5      | 5       | 30          | 0       | 0     | 0   | 0    | 0     | 0            |
| CN                  | 2004 | ALS       | 8/30-9/10   | 17                 | 0                     | 17             | —         | 17      | 123         | 0       | 0     | 4   | 0    | 4     | 24           |
| CN                  | 2004 | ALS       | 8/30-9/10   | 3                  | 2                     | 3              | 100.0     | 3       | 9           | 0       | 0     | 0   | 0    | 0     | 0            |
| CN                  | 2004 | ALS       | 9/17-9/23   | 17                 | 0                     | 17             | —         | 17      | 79          | 0       | 0     | 0   | 3    | 3     | 18           |
| CN                  | 2004 | ALS       | 9/17-9/23   | 3                  | 0                     | 3              | —         | 0       | 0           | 0       | 0     | 0   | 0    | 0     | —            |

BE = Early Bull    B = Bull    ALS = Antlerless    AE = Any Elk    CN = Camp Navajo    CH = CHAMP Hunt    DV = Disabled Veteran

### Herd-Units:

CC = Canyon Creek    HM = Hutch Mtn.    MM = Melatone Mesa    SM = East Sunset/West Sunset/Meteor Crater    WI = Winslow  
ES (Unit 1) = Escudilla    M = Martinez    MZ = Mazatzal    TT = Twin Arrows/Two Guns/Grapevine    WS (17/20A/20C) = Williamson  
GV = Grapevine    ML = Marshall Lake    RV = Round Valley    VV = Verde Valley    Valley/Skull Valley/Kirkland Junction

# Elk Hunt Data

## 5-Year: 2004-2008 Harvest

| Unit                |  | Year | Hunt Type | Dates       | Permits Authorized | 1st Choice Applicants | Permits Issued | Draw Odds | Hunters | Hunter Days | Harvest |       |     |      |       | Hunt Success |
|---------------------|--|------|-----------|-------------|--------------------|-----------------------|----------------|-----------|---------|-------------|---------|-------|-----|------|-------|--------------|
|                     |  |      |           |             |                    |                       |                |           |         |             | Bull    | Spike | Cow | Calf | Total |              |
| ARCHERY (continued) |  |      |           |             |                    |                       |                |           |         |             |         |       |     |      |       |              |
| CN                  |  | 2005 | ALS       | 8/29-9/09   | 17                 | 0                     | 17             | —         | 17      | 129         | 0       | 0     | 0   | 3    | 3     | 18           |
| CN                  |  | 2005 | ALS       | 8/29-9/09   | 3                  | 0                     | 3              | —         | 3       | 34          | 0       | 0     | 0   | 0    | 0     | 0            |
| CN                  |  | 2005 | ALS       | 9/16-9/22   | 17                 | 0                     | 17             | —         | 10      | 37          | 0       | 0     | 7   | 3    | 10    | 100          |
| CN                  |  | 2005 | ALS       | 9/16-9/22   | 3                  | 0                     | 3              | —         | 3       | 6           | 0       | 0     | 0   | 0    | 0     | 0            |
| CN                  |  | 2006 | ALS       | 9/04-9/14   | 20                 | 0                     | 20             | —         | 20      | 70          | 0       | 0     | 3   | 0    | 3     | 15           |
| CN                  |  | 2006 | ALS       | 9/04-9/14   | 3                  | 0                     | 3              | —         | 3       | 21          | 0       | 0     | 1   | 0    | 1     | 33           |
| CN                  |  | 2006 | ALS       | 9/15-9/24   | 20                 | 0                     | 20             | —         | 20      | 93          | 0       | 0     | 5   | 0    | 5     | 25           |
| CN                  |  | 2006 | ALS       | 9/15-9/24   | 3                  | 3                     | 3              | 100.0     | 3       | 28          | 0       | 0     | 2   | 0    | 2     | 67           |
| CN                  |  | 2007 | ALS       | 8/30-9/06   | 20                 | 1                     | 20             | 100.0     | 20      | 78          | 0       | 0     | 0   | 2    | 2     | 10           |
| CN                  |  | 2007 | ALS       | 8/30-9/06   | 3                  | 0                     | 3              | —         | 3       | 15          | 0       | 0     | 0   | 0    | 0     | 0            |
| CN                  |  | 2007 | ALS       | 9/14-9/23   | 20                 | 0                     | 20             | —         | 18      | 91          | 0       | 0     | 2   | 0    | 2     | 11           |
| CN                  |  | 2007 | ALS       | 9/14-9/23   | 3                  | 2                     | 3              | 100.0     | 3       | 27          | 0       | 0     | 0   | 0    | 0     | 0            |
| CN                  |  | 2008 | ALS       | 8/29-9/04   | 20                 | 0                     | 20             | —         | 16      | 89          | 0       | 0     | 0   | 0    | 0     | 0            |
| CN                  |  | 2008 | ALS       | 8/29-9/04   | 3                  | 1                     | 3              | 100.0     | 3       | 21          | 0       | 0     | 0   | 0    | 0     | 0            |
| CN                  |  | 2008 | ALS       | 9/12-9/21   | 20                 | 2                     | 20             | 100.0     | 20      | 90          | 0       | 0     | 2   | 0    | 2     | 10           |
| CN                  |  | 2008 | ALS       | 9/12-9/21   | 3                  | 3                     | 3              | 33.3      | 3       | 21          | 0       | 0     | 0   | 0    | 0     | 0            |
| CN                  |  | 2008 | ALS       | 11/07-11/20 | 20                 | 0                     | 20             | —         | 17      | 76          | 0       | 0     | 1   | 0    | 1     | 6            |
| CN                  |  | 2008 | ALS       | 11/07-11/20 | 3                  | 0                     | 3              | —         | 0       | 0           | 0       | 0     | 0   | 0    | 0     | —            |
| CN                  |  | 2004 | AE        | 8/30-9/10   | 10                 | 8                     | 10             | 87.5      | 10      | 65          | 0       | 0     | 0   | 0    | 0     | 0            |
| CN                  |  | 2004 | AE        | 8/30-9/10   | 2                  | 4                     | 2              | 25.0      | 2       | 6           | 0       | 0     | 0   | 0    | 0     | 0            |
| CN                  |  | 2004 | AE        | 9/17-9/23   | 20                 | 20                    | 20             | 85.0      | 20      | 83          | 5       | 0     | 0   | 0    | 5     | 25           |
| CN                  |  | 2004 | AE        | 9/17-9/23   | 2                  | 5                     | 2              | 40.0      | 2       | 12          | 0       | 0     | 0   | 0    | 0     | 0            |
| CN                  |  | 2005 | AE        | 8/29-9/09   | 10                 | 25                    | 12             | 48.0      | 12      | 67          | 2       | 2     | 0   | 0    | 4     | 33           |
| CN                  |  | 2005 | AE        | 8/29-9/09   | 2                  | 16                    | 2              | 12.5      | 2       | 10          | 0       | 0     | 0   | 0    | 0     | 0            |
| CN                  |  | 2005 | AE        | 9/16-9/22   | 20                 | 26                    | 20             | 57.7      | 18      | 95          | 5       | 0     | 3   | 0    | 8     | 44           |
| CN                  |  | 2005 | AE        | 9/16-9/22   | 2                  | 16                    | 2              | 12.5      | 2       | 8           | 0       | 0     | 0   | 0    | 0     | 0            |
| CN                  |  | 2006 | AE        | 9/04-9/14   | 17                 | 10                    | 17             | 80.0      | 17      | 95          | 3       | 0     | 0   | 0    | 3     | 18           |
| CN                  |  | 2006 | AE        | 9/04-9/14   | 2                  | 7                     | 2              | 28.6      | 0       | 0           | 0       | 0     | 0   | 0    | 0     | —            |
| CN                  |  | 2006 | AE        | 9/15-9/24   | 17                 | 26                    | 17             | 57.7      | 17      | 95          | 3       | 3     | 0   | 0    | 6     | 35           |
| CN                  |  | 2006 | AE        | 9/15-9/24   | 2                  | 6                     | 2              | 33.3      | 0       | 0           | 0       | 0     | 0   | 0    | 0     | —            |
| CN                  |  | 2007 | AE        | 8/30-9/06   | 17                 | 4                     | 16             | 75.0      | 16      | 92          | 2       | 2     | 2   | 0    | 6     | 38           |
| CN                  |  | 2007 | AE        | 8/30-9/06   | 2                  | 3                     | 2              | 33.3      | 2       | 6           | 0       | 0     | 0   | 0    | 0     | 0            |
| CN                  |  | 2007 | AE        | 9/14-9/23   | 17                 | 32                    | 17             | 40.6      | 13      | 77          | 4       | 0     | 4   | 0    | 8     | 62           |
| CN                  |  | 2007 | AE        | 9/14-9/23   | 2                  | 10                    | 2              | 20.0      | 2       | 20          | 2       | 0     | 0   | 0    | 2     | 100          |
| CN                  |  | 2008 | AE        | 8/29-9/04   | 17                 | 12                    | 17             | 91.7      | 15      | 64          | 0       | 0     | 0   | 0    | 0     | 0            |
| CN                  |  | 2008 | AE        | 8/29-9/04   | 2                  | 5                     | 2              | 0.0       | 2       | 14          | 0       | 0     | 0   | 0    | 0     | 0            |
| CN                  |  | 2008 | AE        | 9/12-9/21   | 17                 | 32                    | 17             | 40.6      | 14      | 68          | 3       | 0     | 0   | 0    | 3     | 21           |
| CN                  |  | 2008 | AE        | 9/12-9/21   | 2                  | 11                    | 2              | 18.2      | 0       | 0           | 0       | 0     | 0   | 0    | 0     | —            |
| CN                  |  | 2008 | AE        | 11/07-11/20 | 17                 | 1                     | 17             | 100.0     | 17      | 116         | 0       | 0     | 0   | 0    | 0     | 0            |
| CN                  |  | 2008 | AE        | 11/07-11/20 | 2                  | 2                     | 2              | 50.0      | 2       | 16          | 0       | 0     | 0   | 0    | 0     | 0            |

BE = Early Bull    B = Bull    ALS = Antlerless    AE = Any Elk    CN = Camp Navajo    CH = CHAMP Hunt    DV = Disabled Veteran



---

# Turkey (*Meleagris gallopavo*)

---

## *Natural History*

Arizona has two native subspecies of turkeys, Merriam's and Gould's. The Merriam's race of wild turkey (*M. g. merriami*) is found throughout the western United States, primarily in the ponderosa pine forests of Colorado, New Mexico, and northern Arizona. This turkey has also been transplanted into the pine for-

ests of Utah, Idaho, Washington, Oregon, California, Montana, Wyoming, and South Dakota. The Gould's turkey (*M. g. mexicana*) is only found in Arizona and New Mexico. In Arizona, wild turkeys can be found not only in ponderosa pine forests but also in riparian deciduous forests and other vegetation types at elevations ranging from 3,500 to 10,000 feet. The best populations of Merriam's, however, occur in the pon-

derosa pine forests north of the Gila River. The Gould's occupy the sky island habitats in southeastern Arizona.

In the spring, 2-year-old and older males weigh about 18 pounds on average, and yearling males or "jakes" weigh about 13 pounds. Hens more than a year old weigh between 8 and 12 pounds, depending partially on the contents of the crop, which may weigh up to a pound. As springtime temperatures warm, the onset of breeding is heralded by the commencement of gobbling. Gobbling may start as early as late February or early March, with a second peak of gobbling occurring in early May with some "toms" continuing to gobble into June. Hens mate once and lay between 8 and 12 eggs that take 28 days to incubate. The young are precocial and move from the nest soon after hatching.

Both hens and poults spend the rest of the summer eating, loafing, and gaining weight. As winter approaches, they begin to form flocks with other family groups. The flocks will usually spend the winter as high up on the mountain as

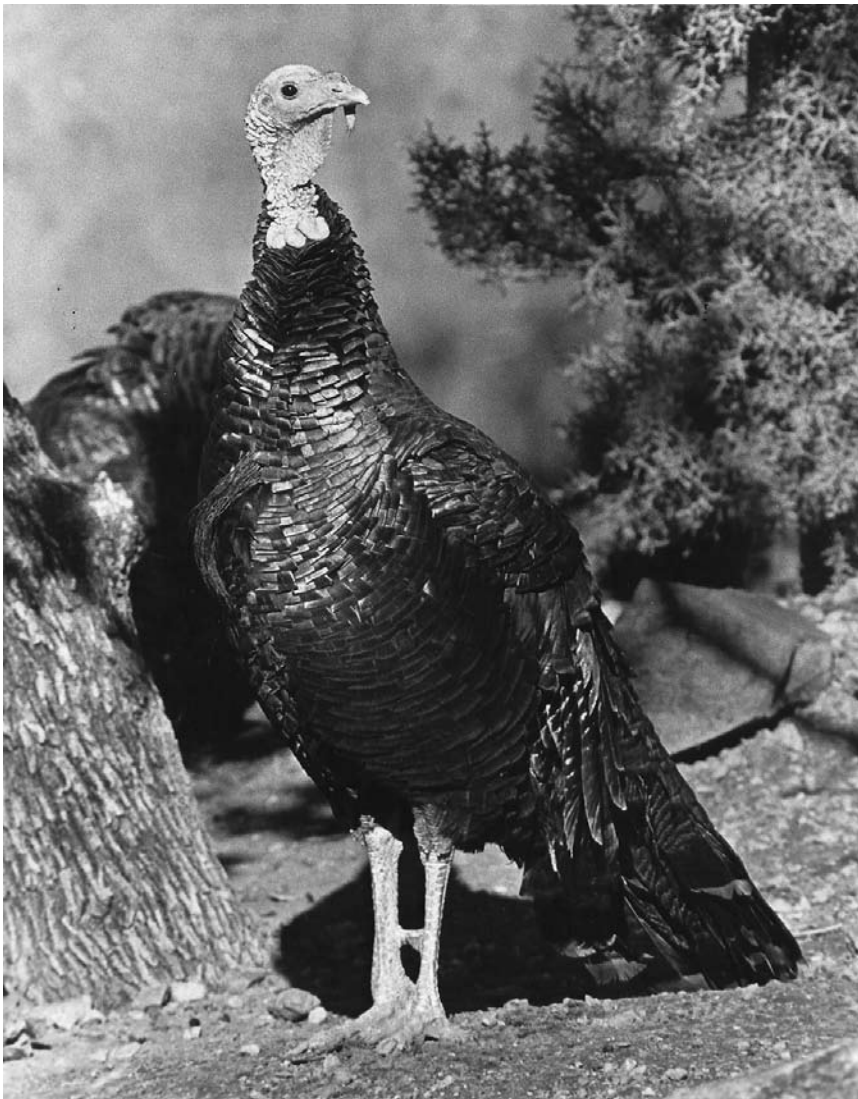

BOB MILES

snow permits. The gobblers, too, have a defined wintering area in which they will flock together. During the winter, turkeys congregate in the pinyon pine-oak habitats just below the interface with the ponderosa pine forest. Following the snow line, both hen and tom turkey flocks work their way upslope to where gobbling toms attempt to accrue a harem of several hens. After mating, the hens often continue upslope into denser habitats to lay and incubate their eggs. Toms and hens are not usually seen together during the remainder of the year, although they may both frequent similar habitats.

During the summer months, the hens and poults spend much of their time searching for bugs and seeds in small meadows and forest openings. As winter approaches, the turkeys feed increasingly on acorns, pinyon nuts, and other mast crops. Later, with the onset of winter, the birds follow pine stringers downslope to snow-free areas where they feed on the seeds of ponderosa pine, junipers, pinyons, and other plants.

### *Hunt History*

Wild turkeys have been classified as big game since 1913 when the first state legislature established a bag limit of three birds to be taken between October 1 and December 15. Turkey populations appeared to hold up fairly well, at least in northern Arizona, as the season was still a month long and the bag limit was only reduced to two in the new "game code" of 1929. After World War II, however, hunt pressure gradually in-

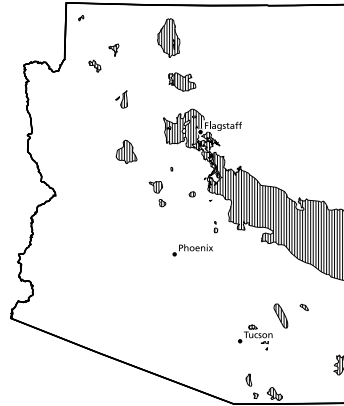

**Arizona's turkey distribution**

creased, and hunt regulations became more stringent. Fall hunting was the only turkey hunting allowed, and by 1950 a hunter had to draw a permit to even hunt turkeys. Annual harvests ranged from a few hundred birds to more than 1,300. Turkey populations were fairly robust in the early 1960s, and the permit requirement was dropped in 1963; tag sales jumped from 8,050 in 1962 to 17,479 in 1963, but the turkey harvest only increased from 1,363 to 1,462. The first spring gobbler hunt was authorized in 1965 (100 permits), and by 1969 the annual turkey harvest had climbed to 2,480 birds, with another 138 turkeys taken earlier that spring. That number remains an annual high.

Wild turkey populations have since been in a general decline. Current estimates number the population between 15,000 and 20,000 birds, depending on conditions. Fall hunting is again by permit-only, and in the spring the number of gobblers taken is equal to or greater than the fall harvest.

# Turkey Survey Data

## Historic Summary of Turkey Survey Data

| Year | Tom | Hen | Poult | Unclassified | Total | Poults/Hen | Percent Young <sup>1</sup> |
|------|-----|-----|-------|--------------|-------|------------|----------------------------|
| 1960 | 343 | 267 | 544   | 31           | 1185  | 2.0        | 47                         |
| 1961 | 297 | 260 | 634   | 64           | 1255  | 2.4        | 53                         |
| 1962 | 248 | 293 | 847   | 28           | 1416  | 2.9        | 61                         |
| 1963 | 273 | 374 | 1058  | 58           | 1763  | 2.8        | 62                         |
| 1964 | 191 | 288 | 881   | 42           | 1402  | 3.1        | 65                         |
| 1965 | 193 | 290 | 905   | 77           | 1465  | 3.1        | 65                         |
| 1966 | 286 | 311 | 1034  | 34           | 1665  | 3.3        | 63                         |
| 1967 | 337 | 413 | 809   | 111          | 1670  | 2.0        | 52                         |
| 1968 | 299 | 295 | 978   | 188          | 1760  | 3.3        | 62                         |
| 1969 | 236 | 304 | 1152  | 30           | 1722  | 3.8        | 68                         |
| 1970 | 207 | 345 | 667   | 81           | 1300  | 1.9        | 55                         |
| 1971 | 224 | 369 | 654   | 131          | 1378  | 1.8        | 52                         |
| 1972 | 205 | 264 | 678   | 75           | 1222  | 2.6        | 59                         |
| 1973 | 129 | 207 | 641   | 89           | 1066  | 3.1        | 66                         |
| 1974 | 155 | 193 | 729   | 73           | 1150  | 3.8        | 68                         |
| 1975 | 125 | 368 | 1406  | 351          | 2250  | 3.8        | 74                         |
| 1976 | 98  | 262 | 1138  | 121          | 1619  | 4.3        | 76                         |
| 1977 | 87  | 299 | 1391  | 74           | 1851  | 4.7        | 78                         |
| 1978 | 179 | 307 | 1190  | 91           | 1767  | 3.9        | 71                         |
| 1979 | 100 | 129 | 421   | 24           | 674   | 3.3        | 65                         |
| 1980 | 42  | 111 | 401   | 81           | 635   | 3.6        | 72                         |
| 1981 | 82  | 120 | 626   | 158          | 986   | 5.2        | 76                         |
| 1982 | 105 | 157 | 586   | 17           | 865   | 3.7        | 69                         |
| 1983 | 64  | 153 | 517   | 0            | 734   | 3.4        | 70                         |
| 1984 | 156 | 202 | 664   | 159          | 1181  | 3.3        | 65                         |
| 1985 | 88  | 332 | 1033  | 125          | 1578  | 3.1        | 71                         |
| 1986 | 136 | 300 | 926   | 62           | 1424  | 3.1        | 68                         |
| 1987 | 137 | 251 | 735   | 141          | 1264  | 2.9        | 65                         |
| 1988 | 63  | 225 | 610   | 172          | 1070  | 2.7        | 68                         |
| 1989 | 183 | 332 | 704   | 84           | 1303  | 2.1        | 58                         |
| 1990 | 121 | 210 | 527   | 109          | 967   | 2.5        | 61                         |
| 1991 | 117 | 176 | 389   | 162          | 844   | 2.2        | 57                         |
| 1992 | 170 | 219 | 707   | 113          | 1209  | 3.2        | 65                         |
| 1993 | 295 | 495 | 1148  | 120          | 2058  | 2.3        | 59                         |
| 1994 | 251 | 381 | 559   | 24           | 1215  | 1.5        | 47                         |
| 1995 | 130 | 306 | 527   | 12           | 975   | 1.7        | 55                         |
| 1996 | 68  | 289 | 292   | 16           | 665   | 1.0        | 45                         |
| 1997 | 37  | 270 | 708   | 15           | 1030  | 2.6        | 70                         |
| 1998 | 122 | 228 | 497   | 4            | 851   | 2.2        | 59                         |
| 1999 | 103 | 212 | 567   | 32           | 914   | 2.7        | 64                         |
| 2000 | 144 | 198 | 303   | 50           | 695   | 1.5        | 47                         |
| 2001 | 62  | 237 | 520   | 88           | 907   | 2.2        | 63                         |
| 2002 | 86  | 44  | 25    | 85           | 240   | 0.6        | 16                         |
| 2003 | 105 | 373 | 1156  | 50           | 1684  | 3.1        | 71                         |
| 2004 | 124 | 144 | 202   | 37           | 507   | 1.4        | 43                         |
| 2005 | 183 | 360 | 783   | 46           | 1372  | 2.2        | 59                         |
| 2006 | 77  | 217 | 361   | 38           | 693   | 1.7        | 55                         |
| 2007 | 102 | 192 | 298   | 25           | 617   | 1.6        | 50                         |
| 2008 | 129 | 266 | 302   | 13           | 710   | 1.1        | 43                         |

<sup>1</sup> Percent young is calculated from classified birds only.

## 5-Year: 2004-2008 Turkey Survey Data

| Unit | Year | Tom | Hen | Poult | Unclassified | Total | Poults/Hen | Percent Young <sup>1</sup> |
|------|------|-----|-----|-------|--------------|-------|------------|----------------------------|
| 1    | 2004 | 2   | 25  | 27    | 0            | 54    | 1.1        | 50                         |
| 1    | 2005 | 18  | 84  | 146   | 0            | 248   | 1.7        | 59                         |
| 1    | 2006 | 38  | 81  | 102   | 0            | 221   | 1.3        | 46                         |
| 1    | 2007 | 29  | 18  | 36    | 0            | 83    | 2.0        | 43                         |
| 1    | 2008 | 43  | 99  | 91    | 13           | 246   | 0.9        | 39                         |
| 3B   | 2005 | 0   | 4   | 0     | 0            | 4     | 0.0        | 0                          |
| 3B   | 2007 | 19  | 0   | 0     | 0            | 19    | —          | 0                          |
| 3C   | 2005 | 17  | 37  | 26    | 1            | 81    | 0.7        | 33                         |

<sup>1</sup> Percent young is calculated from classified birds only.

# Turkey Survey Data

## 5-Year: 2004-2008 Turkey Survey Data

| Unit | Year | Tom | Hen | Poult | Unclassified | Total | Poults/Hen | Percent Young <sup>1</sup> |
|------|------|-----|-----|-------|--------------|-------|------------|----------------------------|
| 3C   | 2006 | 4   | 14  | 41    | 0            | 59    | 2.9        | 69                         |
| 3C   | 2007 | 1   | 19  | 47    | 19           | 86    | 2.5        | 70                         |
| 3C   | 2008 | 11  | 15  | 6     | 0            | 32    | 0.4        | 19                         |
| 4    | 2004 | 22  | 25  | 22    | 1            | 70    | 0.9        | 32                         |
| 4    | 2005 | 42  | 29  | 67    | 0            | 138   | 2.3        | 49                         |
| 4    | 2006 | 8   | 13  | 34    | 0            | 55    | 2.6        | 62                         |
| 4    | 2007 | 2   | 8   | 31    | 0            | 41    | 3.9        | 76                         |
| 4    | 2008 | 0   | 10  | 35    | 0            | 45    | 3.5        | 78                         |
| 5A   | 2004 | 5   | 20  | 27    | 0            | 52    | 1.4        | 52                         |
| 5A   | 2005 | 0   | 9   | 37    | 0            | 46    | 4.1        | 80                         |
| 5A   | 2006 | 0   | 4   | 14    | 27           | 45    | 3.5        | 78                         |
| 5A   | 2007 | 9   | 9   | 23    | 0            | 41    | 2.6        | 56                         |
| 5A   | 2008 | 10  | 1   | 0     | 0            | 11    | 0.0        | 0                          |
| 5B   | 2007 | 5   | 13  | 12    | 0            | 30    | 0.9        | 40                         |
| 6A   | 2005 | 0   | 7   | 19    | 0            | 26    | 2.7        | 73                         |
| 6A   | 2006 | 0   | 2   | 10    | 0            | 12    | 5.0        | 83                         |
| 6B   | 2004 | 6   | 2   | 5     | 0            | 13    | 2.5        | 38                         |
| 6B   | 2005 | 5   | 17  | 17    | 0            | 39    | 1.0        | 44                         |
| 6B   | 2006 | 0   | 0   | 0     | 11           | 11    | —          | —                          |
| 6B   | 2007 | 0   | 0   | 0     | 3            | 3     | —          | —                          |
| 7    | 2005 | 4   | 3   | 12    | 0            | 19    | 4.0        | 63                         |
| 7    | 2006 | 5   | 20  | 10    | 0            | 35    | 0.5        | 29                         |
| 7    | 2007 | 10  | 0   | 0     | 0            | 10    | —          | 0                          |
| 8    | 2004 | 17  | 6   | 8     | 0            | 31    | 1.3        | 26                         |
| 8    | 2005 | 18  | 31  | 76    | 22           | 147   | 2.5        | 61                         |
| 8/10 | 2006 | 4   | 8   | 33    | 0            | 45    | 4.1        | 73                         |
| 8/10 | 2007 | 8   | 42  | 19    | 0            | 69    | 0.5        | 28                         |
| 9    | 2006 | 5   | 0   | 0     | 0            | 5     | —          | 0                          |
| 9    | 2008 | 2   | 14  | 18    | 0            | 34    | 1.3        | 53                         |
| 12A  | 2004 | 13  | 14  | 45    | 0            | 72    | 3.2        | 63                         |
| 12A  | 2005 | 4   | 12  | 55    | 0            | 71    | 4.6        | 77                         |
| 12A  | 2006 | 7   | 12  | 34    | 0            | 53    | 2.8        | 64                         |
| 12A  | 2007 | 3   | 11  | 31    | 0            | 45    | 2.8        | 69                         |
| 12A  | 2008 | 0   | 22  | 56    | 0            | 78    | 2.6        | 72                         |
| 13A  | 2004 | 8   | 11  | 3     | 0            | 22    | 0.3        | 14                         |
| 13A  | 2005 | 19  | 14  | 28    | 3            | 64    | 2.0        | 46                         |
| 13A  | 2006 | 2   | 2   | 3     | 0            | 7     | 1.5        | 43                         |
| 13A  | 2007 | 7   | 36  | 0     | 0            | 43    | 0.0        | 0                          |
| 13A  | 2008 | 10  | 7   | 3     | 0            | 20    | 0.4        | 15                         |
| 13B  | 2004 | 2   | 14  | 0     | 0            | 16    | 0.0        | 0                          |
| 13BS | 2007 | 5   | 10  | 4     | 3            | 22    | 0.4        | 21                         |
| 13B  | 2008 | 14  | 16  | 0     | 0            | 30    | 0.0        | 0                          |
| 22   | 2004 | 8   | 5   | 12    | 0            | 25    | 2.4        | 48                         |
| 22   | 2005 | 0   | 4   | 13    | 7            | 24    | 3.3        | 76                         |
| 23   | 2004 | 7   | 17  | 40    | 32           | 96    | 2.4        | 63                         |
| 23   | 2005 | 17  | 16  | 61    | 6            | 100   | 3.8        | 65                         |
| 23   | 2006 | 4   | 42  | 31    | 0            | 77    | 0.7        | 40                         |
| 27   | 2004 | 34  | 5   | 13    | 4            | 56    | 2.6        | 25                         |
| 27   | 2005 | 39  | 93  | 226   | 7            | 365   | 2.4        | 63                         |
| 27   | 2006 | 0   | 19  | 49    | 0            | 68    | 2.6        | 72                         |
| 27   | 2007 | 4   | 26  | 95    | 0            | 125   | 3.7        | 76                         |
| 27   | 2008 | 39  | 82  | 93    | 0            | 214   | 1.1        | 43                         |

<sup>1</sup>Percent young is calculated from classified birds only.

## Turkey Harvest Data

### *Historic Summary of General Spring Turkey Hunts (juniors-only listed separately)*

| Year | Permits Authorized | 1st Choice Applicants | Permits Issued | Hunters | Hunter Days | Total Harvest | Percent Success |
|------|--------------------|-----------------------|----------------|---------|-------------|---------------|-----------------|
| 1965 | 100                | —                     | —              | 79      | 134         | 30            | 38.0            |
| 1966 | 500                | —                     | —              | 417     | 716         | 58            | 13.9            |
| 1967 | 1100               | —                     | —              | 878     | —           | 151           | 17.2            |
| 1968 | 1600               | —                     | —              | 1096    | 2440        | 98            | 8.9             |
| 1969 | 2200               | —                     | —              | 1673    | 3719        | 138           | 8.2             |
| 1970 | 2600               | —                     | —              | 1935    | 4579        | 215           | 11.1            |
| 1971 | 2650               | —                     | —              | 2021    | 4702        | 260           | 12.9            |
| 1972 | 2800               | —                     | —              | 1941    | 4674        | 153           | 7.9             |
| 1973 | 2550               | —                     | —              | 1225    | 2705        | 71            | 5.8             |
| 1974 | 2550               | —                     | 2550           | 1747    | 4145        | 151           | 8.6             |
| 1975 | 3450               | —                     | 3450           | 2284    | 5582        | 205           | 9.0             |
| 1976 | 4001               | —                     | 4001           | 1869    | 4642        | 220           | 11.8            |
| 1977 | 4600               | —                     | 4600           | 2679    | 6848        | 326           | 12.2            |
| 1978 | 4865               | —                     | 4865           | 2952    | 7568        | 399           | 13.5            |
| 1979 | 4970               | 6275                  | 3397           | 2853    | 7516        | 317           | 11.1            |
| 1980 | 4950               | 7894                  | 4594           | 2692    | 7225        | 234           | 8.7             |
| 1981 | 4900               | 9143                  | 4654           | 2542    | 8100        | 399           | 15.7            |
| 1982 | 4960               | 9444                  | 4821           | 2648    | 8366        | 390           | 14.7            |
| 1983 | 4960               | 5106                  | 4415           | 3073    | 10270       | 473           | 15.4            |
| 1984 | 4620               | 4725                  | 4107           | 3455    | 11511       | 780           | 22.6            |
| 1985 | 4620               | 5863                  | 4409           | 3382    | 11649       | 688           | 20.3            |
| 1986 | 4620               | 6663                  | 4548           | 3581    | 12421       | 746           | 20.8            |
| 1987 | 4915               | 7132                  | 4834           | 3734    | 13474       | 830           | 22.2            |
| 1988 | 4710               | 8216                  | 4688           | 3736    | 13089       | 697           | 18.7            |
| 1989 | 4660               | 8171                  | 4562           | 3691    | 12998       | 619           | 16.8            |
| 1990 | 4595               | 8553                  | 4577           | 3684    | 13457       | 727           | 19.7            |
| 1991 | 4595               | 8044                  | 4976           | 3994    | 15731       | 617           | 15.4            |
| 1992 | 4725               | 6413                  | 4701           | 3757    | 14563       | 723           | 19.2            |
| 1993 | 4735               | 7260                  | 4732           | 3820    | 15006       | 771           | 20.2            |
| 1994 | 4805               | 7730                  | 4793           | 3795    | 14543       | 768           | 20.2            |
| 1995 | 4840               | 8591                  | 4822           | 3806    | 14038       | 769           | 20.2            |
| 1996 | 5020               | 9258                  | 5007           | 3820    | 13826       | 631           | 16.5            |
| 1997 | 5115               | 9312                  | 5115           | 4021    | 15179       | 660           | 16.4            |
| 1998 | 4719               | 9460                  | 4724           | 3722    | 13503       | 671           | 18.0            |
| 1999 | 4501               | 10260                 | 4476           | 3497    | 12637       | 730           | 21              |
| 2000 | 4840               | 11120                 | 4840           | 3833    | 13474       | 916           | 24              |
| 2001 | 5251               | 12815                 | 5251           | 4232    | 15258       | 987           | 23              |
| 2002 | 5471               | 12643                 | 5470           | 4301    | 16420       | 760           | 18              |
| 2003 | 5096               | 13819                 | 5183           | 4234    | 16633       | 878           | 21              |
| 2004 | 5157               | 16020                 | 5158           | 4055    | 15880       | 788           | 19              |
| 2005 | 5307               | 16355                 | 5375           | 4264    | 16119       | 1155          | 27              |
| 2006 | 5593               | 14945                 | 5599           | 4548    | 17705       | 1129          | 25              |
| 2007 | 6263               | 13583                 | 6269           | 5092    | 19543       | 1269          | 25              |
| 2008 | 7007               | 13281                 | 7001           | 5660    | 22725       | 1040          | 18              |

### *Historic Summary of Juniors-only Spring Turkey Hunts*

| Year | Permits Authorized | 1st Choice Applicants | Permits Issued | Hunters | Hunter Days | Total Harvest | Percent Success |
|------|--------------------|-----------------------|----------------|---------|-------------|---------------|-----------------|
| 1999 | 175                | 120                   | 163            | 150     | 666         | 30            | 20              |
| 2000 | 175                | 202                   | 175            | 155     | 603         | 34            | 22              |
| 2001 | 180                | 307                   | 180            | 156     | 523         | 30            | 19              |
| 2002 | 180                | 254                   | 177            | 137     | 486         | 27            | 20              |
| 2003 | 150                | 290                   | 153            | 125     | 443         | 23            | 18              |
| 2004 | 150                | 341                   | 150            | 119     | 373         | 23            | 19              |
| 2005 | 150                | 327                   | 153            | 122     | 450         | 24            | 20              |
| 2006 | 165                | 461                   | 165            | 143     | 493         | 51            | 36              |
| 2007 | 225                | 563                   | 225            | 202     | 636         | 105           | 52              |
| 2008 | 350                | 582                   | 350            | 295     | 1094        | 82            | 28              |

# Turkey Harvest Data

## *Historic Summary of General Fall Turkey Hunts (juniors-only listed separately)*

| Year <sup>1</sup> | Permits Authorized | 1st Choice Applicants | Permits Issued | Hunters | Hunter Days | Total Harvest | Percent Success |
|-------------------|--------------------|-----------------------|----------------|---------|-------------|---------------|-----------------|
| 1946              | 9747               | –                     | –              | 5406    | –           | 526           | 9.7             |
| 1947              | 2147               | –                     | –              | 1465    | –           | 296           | 20.2            |
| 1948              | 2697               | –                     | –              | 1990    | –           | 403           | 20.3            |
| 1949              | 1243               | –                     | –              | 945     | –           | 307           | 32.5            |
| 1950              | 1657               | –                     | –              | 1377    | –           | 365           | 26.5            |
| 1951              | 3305               | –                     | –              | 2780    | –           | 549           | 19.7            |
| 1952              | 3454               | –                     | –              | 2961    | –           | 782           | 26.4            |
| 1953              | 4672               | –                     | –              | 4096    | –           | 1216          | 29.7            |
| 1954              | 5134               | –                     | –              | 4448    | –           | 971           | 21.8            |
| 1955              | 3012               | –                     | –              | 2760    | –           | 887           | 32.1            |
| 1956              | 4800               | –                     | –              | 4218    | –           | 1367          | 32.4            |
| 1957              | 2600               | –                     | –              | 2138    | –           | 647           | 30.3            |
| 1958              | 2800               | –                     | –              | 2340    | 4308        | 569           | 24.3            |
| 1959              | 5700               | –                     | –              | 4341    | –           | 1050          | 24.2            |
| 1960              | 8150               | –                     | –              | 6607    | 12058       | 1262          | 19.1            |
| 1961              | –                  | –                     | –              | 7374    | 18216       | 1218          | 16.5            |
| 1962              | –                  | –                     | –              | 9296    | 21543       | 1308          | 14.1            |
| 1963              | –                  | –                     | 17479          | 15847   | 35711       | 1434          | 9.0             |
| 1964              | –                  | –                     | 14803          | 13733   | 33614       | 1655          | 12.1            |
| 1965              | –                  | –                     | 15470          | 14367   | 34846       | 2001          | 13.9            |
| 1966              | –                  | –                     | 15681          | 14381   | 34353       | 1762          | 12.3            |
| 1967              | –                  | –                     | 17388          | 14626   | 37391       | 1601          | 10.9            |
| 1968              | –                  | –                     | 16782          | 15063   | 38754       | 1518          | 10.1            |
| 1969              | –                  | –                     | 18330          | 14768   | 37735       | 2392          | 16.2            |
| 1970              | –                  | –                     | 19222          | 15673   | 43147       | 2002          | 12.8            |
| 1971              | –                  | –                     | 17002          | 13176   | 34196       | 1200          | 9.1             |
| 1972              | –                  | –                     | –              | 9584    | 26422       | 794           | 8.3             |
| 1973              | –                  | –                     | –              | 13142   | 36597       | 2050          | 15.6            |
| 1974              | –                  | –                     | –              | 12262   | 36634       | 1040          | 8.5             |
| 1975              | –                  | –                     | –              | 9542    | 27676       | 1464          | 15.3            |
| 1976              | –                  | –                     | –              | 8208    | 24754       | 508           | 6.2             |
| 1977              | –                  | –                     | –              | 8652    | 28320       | 997           | 11.5            |
| 1978              | –                  | –                     | –              | 9119    | 25395       | 1427          | 15.6            |
| 1979              | –                  | –                     | –              | 8775    | 28646       | 856           | 9.8             |
| 1980              | –                  | –                     | –              | 12578   | 34546       | 1192          | 9.5             |
| 1981              | –                  | –                     | –              | 10640   | 36027       | 1390          | 13.1            |
| 1982              | –                  | –                     | –              | 9923    | 34692       | 1496          | 15.1            |
| 1983              | –                  | –                     | –              | 9286    | 31185       | 893           | 9.6             |
| 1984              | –                  | –                     | 7737           | 9302    | 30146       | 1236          | 13.3            |
| 1985              | –                  | –                     | 8271           | 9975    | 32701       | 1125          | 11.3            |
| 1986              | –                  | –                     | 7510           | 8740    | 29245       | 941           | 10.8            |
| 1987              | –                  | –                     | 8914           | 10912   | 37068       | 1935          | 17.7            |
| 1988              | –                  | –                     | 8259           | 10425   | 32224       | 1459          | 14.0            |
| 1989              | –                  | –                     | 9289           | 11156   | 32410       | 1927          | 17.3            |
| 1990              | –                  | –                     | 7836           | 9609    | 29003       | 982           | 10.2            |
| 1991              | 9280               | 3951                  | 6332           | 5076    | 14330       | 955           | 18.8            |
| 1992              | 8730               | 5497                  | 6731           | 5310    | 14563       | 1008          | 19.0            |
| 1993              | 8740               | 6123                  | 7822           | 6310    | 17505       | 1048          | 16.6            |
| 1994              | 6965               | 6850                  | 6921           | 5435    | 15051       | 1009          | 18.6            |
| 1995              | 6245               | 7322                  | 6237           | 4857    | 13447       | 1034          | 21.3            |
| 1996              | 5350               | 7721                  | 5350           | 4188    | 12203       | 486           | 11.6            |
| 1997              | 4050               | 7766                  | 4050           | 3080    | 8492        | 511           | 16.6            |
| 1998              | 3700               | 7226                  | 3700           | 2775    | 7648        | 508           | 18              |
| 1999              | 4160               | 8972                  | 4160           | 3283    | 8935        | 872           | 27              |
| 2000              | 4760               | 9417                  | 4760           | 3689    | 10660       | 793           | 21              |
| 2001              | 4635               | 9451                  | 4635           | 3623    | 9723        | 1213          | 33              |
| 2002              | 5085               | 12240                 | 5085           | 3933    | 11904       | 407           | 10              |
| 2003              | 4260               | 12774                 | 4260           | 3199    | 8955        | 875           | 27              |
| 2004              | 4785               | 14455                 | 4785           | 3676    | 11390       | 539           | 15              |
| 2005              | 4830               | 11563                 | 4832           | 3811    | 10720       | 1117          | 29              |
| 2006              | 5310               | 14910                 | 5302           | 3970    | 11224       | 640           | 16              |
| 2007              | 5870               | 9922                  | 5868           | 4664    | 14317       | 1087          | 23              |
| 2008              | 6100               | 7820                  | 5883           | 4659    | 14096       | 902           | 19              |

<sup>1</sup> Archery data are included in hunters, hunter days, and harvest from 1969-1990.

# Turkey Harvest Data

## Historic Summary of Juniors-only Fall Turkey Hunts

| Year | Permits Authorized | 1st Choice Applicants | Permits Issued | Hunters | Hunter Days | Total Harvest | Percent Success |
|------|--------------------|-----------------------|----------------|---------|-------------|---------------|-----------------|
| 1998 | 100                | 59                    | 89             | 76      | 197         | 8             | 11              |
| 1999 | 100                | 105                   | 100            | 86      | 236         | 21            | 24              |
| 2000 | 100                | 169                   | 100            | 81      | 218         | 13            | 16              |
| 2001 | 125                | 164                   | 125            | 96      | 264         | 33            | 34              |
| 2002 | 125                | 241                   | 125            | 91      | 282         | 6             | 7               |
| 2003 | 125                | 240                   | 125            | 103     | 231         | 18            | 17              |
| 2004 | 100                | 250                   | 100            | 72      | 196         | 4             | 6               |
| 2005 | 100                | 137                   | 100            | 71      | 191         | 16            | 23              |
| 2006 | 150                | 246                   | 148            | 100     | 262         | 19            | 19              |
| 2007 | 150                | 179                   | 150            | 114     | 304         | 12            | 11              |
| 2008 | OTC                | –                     | 336            | 317     | 929         | 37            | 12              |

OTC = Over the counter nonpermit-tags.

## Historic Summary of Archery Fall Turkey Hunts

| Year              | Permits Authorized | 1st Choice Applicants | Permits Issued | Hunters | Hunter Days | Total Harvest | Percent Success |
|-------------------|--------------------|-----------------------|----------------|---------|-------------|---------------|-----------------|
| 1991              | –                  | –                     | 1289           | 1072    | 4331        | 20            | 1.9             |
| 1992              | –                  | –                     | 1337           | 1245    | 4692        | 19            | 1.5             |
| 1993              | –                  | –                     | 1760           | 1465    | 6804        | 55            | 3.8             |
| 1994              | –                  | –                     | 1808           | 1533    | 7258        | 59            | 3.8             |
| 1995              | –                  | –                     | 1784           | 1426    | 7011        | 26            | 1.8             |
| 1996              | –                  | –                     | 1939           | 1479    | 7684        | 37            | 2.5             |
| 1997              | –                  | –                     | 1891           | 1390    | 7194        | 44            | 3.2             |
| 1998              | –                  | –                     | 2133           | 1739    | 8435        | 96            | 5.6             |
| 1999              | –                  | –                     | 2523           | 2082    | 10913       | 103           | 4.5             |
| 2000              | –                  | –                     | 3084           | 2539    | 13320       | 120           | 4.7             |
| 2001              | –                  | –                     | 3115           | 2722    | 13838       | 190           | 7.0             |
| 2002              | –                  | –                     | 3117           | 2583    | 12627       | 138           | 5.3             |
| 2003              | –                  | –                     | 2914           | 2485    | 12507       | 71            | 2.9             |
| 2004              | –                  | –                     | 3223           | 2630    | 12890       | 160           | 6.1             |
| 2005              | –                  | –                     | 3450           | 2586    | 12725       | 174           | 6.7             |
| 2006              | –                  | –                     | 3941           | 2820    | 13818       | 140           | 5.0             |
| 2007              | –                  | –                     | 4660           | 2719    | 14036       | 221           | 8.1             |
| 2008 <sup>1</sup> | –                  | –                     | 3831           | 2137    | 10403       | 103           | 4.8             |

<sup>1</sup> 2008 data is preliminary.

## 5-Year: 2004–2008 Harvest

| Unit                  | Year | Dates     | Permits Authorized | 1st Choice Applicants | Permits Issued | Draw Odds | Hunters | Hunter Days | Harvest | Hunt Success |
|-----------------------|------|-----------|--------------------|-----------------------|----------------|-----------|---------|-------------|---------|--------------|
| <b>SPRING GENERAL</b> |      |           |                    |                       |                |           |         |             |         |              |
| 1                     | 2004 | 4/23-4/29 | 375                | 2076                  | 376            | 17.5      | 303     | 1118        | 92      | 30           |
| 1                     | 2004 | 4/30-5/20 | 400                | 674                   | 400            | 32.9      | 286     | 1016        | 48      | 17           |
| 1                     | 2005 | 4/22-4/28 | 400                | 2032                  | 404            | 19.3      | 349     | 1191        | 136     | 39           |
| 1                     | 2005 | 4/29-5/19 | 425                | 760                   | 428            | 30.9      | 320     | 1120        | 63      | 20           |
| 1                     | 2006 | 4/28-5/04 | 425                | 2037                  | 425            | 20.2      | 354     | 1174        | 129     | 36           |
| 1                     | 2006 | 5/05-5/25 | 450                | 331                   | 450            | 43.5      | 363     | 1340        | 79      | 22           |
| 1                     | 2007 | 4/27-5/03 | 450                | 1755                  | 450            | 23.9      | 394     | 1309        | 163     | 41           |
| 1                     | 2007 | 5/04-5/24 | 475                | 321                   | 475            | 54.5      | 380     | 1383        | 91      | 24           |
| 1                     | 2008 | 4/25-5/01 | 500                | 1912                  | 500            | 24.9      | 435     | 1645        | 107     | 25           |
| 1                     | 2008 | 5/02-5/22 | 525                | 253                   | 525            | 61.3      | 409     | 1593        | 43      | 11           |
| 3B                    | 2004 | 4/23-5/20 | 100                | 296                   | 100            | 29.7      | 80      | 254         | 13      | 16           |
| 3B                    | 2005 | 4/22-5/19 | 125                | 254                   | 128            | 37.0      | 104     | 501         | 24      | 23           |
| 3B                    | 2006 | 4/28-5/25 | 150                | 251                   | 150            | 40.2      | 119     | 633         | 25      | 21           |
| 3B                    | 2007 | 4/27-5/03 | 100                | 188                   | 100            | 38.3      | 82      | 304         | 16      | 20           |
| 3B                    | 2007 | 5/04-5/24 | 100                | 42                    | 100            | 90.5      | 93      | 459         | 15      | 16           |
| 3B                    | 2008 | 4/25-5/01 | 100                | 236                   | 100            | 37.7      | 78      | 346         | 15      | 19           |
| 3B                    | 2008 | 5/02-5/22 | 100                | 35                    | 100            | 88.6      | 80      | 351         | 15      | 19           |
| 3C                    | 2004 | 4/23-5/20 | 50                 | 367                   | 50             | 13.6      | 44      | 117         | 26      | 59           |
| 3C                    | 2005 | 4/22-5/19 | 75                 | 532                   | 75             | 13.5      | 72      | 284         | 48      | 67           |

CN = Camp Navajo



# Turkey Hunt Data

## 5-Year: 2004-2008 Harvest

| Unit                              | Year | Dates     | Permits Authorized | 1st Choice Applicants | Permits Issued | Draw Odds | Hunters | Hunter Days | Harvest | Hunt Success |
|-----------------------------------|------|-----------|--------------------|-----------------------|----------------|-----------|---------|-------------|---------|--------------|
| <b>SPRING GENERAL (continued)</b> |      |           |                    |                       |                |           |         |             |         |              |
| 3C                                | 2006 | 4/28-5/25 | 150                | 776                   | 150            | 19.1      | 136     | 584         | 82      | 60           |
| 3C                                | 2007 | 4/27-5/03 | 125                | 758                   | 125            | 15.8      | 111     | 395         | 54      | 49           |
| 3C                                | 2007 | 5/04-5/24 | 100                | 95                    | 100            | 27.4      | 89      | 383         | 40      | 45           |
| 3C                                | 2008 | 4/25-5/01 | 175                | 857                   | 175            | 20.0      | 158     | 651         | 64      | 41           |
| 3C                                | 2008 | 5/02-5/22 | 175                | 82                    | 175            | 63.4      | 149     | 693         | 22      | 15           |
| 4                                 | 2004 | 4/23-5/20 | 275                | 1222                  | 275            | 21.5      | 220     | 1042        | 35      | 16           |
| 4                                 | 2005 | 4/22-5/19 | 275                | 1128                  | 277            | 22.3      | 230     | 868         | 66      | 29           |
| 4                                 | 2006 | 4/28-5/25 | 325                | 1224                  | 325            | 24.4      | 243     | 1021        | 60      | 25           |
| 4                                 | 2007 | 4/27-5/03 | 200                | 719                   | 200            | 26.0      | 159     | 675         | 43      | 27           |
| 4                                 | 2007 | 5/04-5/24 | 200                | 107                   | 200            | 53.3      | 160     | 640         | 17      | 11           |
| 4                                 | 2008 | 4/25-5/01 | 250                | 700                   | 250            | 31.6      | 189     | 755         | 47      | 25           |
| 4                                 | 2008 | 5/02-5/22 | 250                | 98                    | 250            | 62.2      | 192     | 760         | 28      | 15           |
| 5A                                | 2004 | 4/23-5/20 | 250                | 927                   | 250            | 24.1      | 206     | 806         | 34      | 17           |
| 5A                                | 2005 | 4/22-5/19 | 300                | 1100                  | 300            | 23.1      | 260     | 1143        | 69      | 27           |
| 5A                                | 2006 | 4/28-5/04 | 200                | 831                   | 200            | 21.2      | 158     | 543         | 51      | 32           |
| 5A                                | 2006 | 5/05-5/25 | 200                | 160                   | 200            | 56.9      | 163     | 642         | 14      | 9            |
| 5A                                | 2007 | 4/27-5/03 | 225                | 755                   | 225            | 26.6      | 207     | 779         | 43      | 21           |
| 5A                                | 2007 | 5/04-5/24 | 225                | 114                   | 225            | 60.5      | 180     | 812         | 17      | 9            |
| 5A                                | 2008 | 4/25-5/01 | 225                | 734                   | 223            | 28.1      | 189     | 742         | 21      | 11           |
| 5A                                | 2008 | 5/02-5/22 | 225                | 105                   | 225            | 71.4      | 174     | 673         | 16      | 9            |
| 5B                                | 2004 | 4/23-5/20 | 250                | 727                   | 250            | 28.1      | 207     | 961         | 33      | 16           |
| 5B                                | 2005 | 4/22-5/19 | 250                | 857                   | 250            | 26.5      | 207     | 780         | 50      | 24           |
| 5B                                | 2006 | 4/28-5/25 | 275                | 799                   | 275            | 29.8      | 232     | 958         | 45      | 19           |
| 5B                                | 2007 | 4/27-5/03 | 150                | 516                   | 150            | 24.2      | 124     | 572         | 20      | 16           |
| 5B                                | 2007 | 5/04-5/24 | 150                | 110                   | 150            | 56.4      | 131     | 578         | 24      | 18           |
| 5B                                | 2008 | 4/25-5/01 | 150                | 481                   | 150            | 28.1      | 117     | 481         | 20      | 17           |
| 5B                                | 2008 | 5/02-5/22 | 150                | 62                    | 150            | 64.5      | 107     | 401         | 6       | 6            |
| 6A                                | 2004 | 4/23-4/29 | 275                | 1970                  | 275            | 13.8      | 246     | 863         | 43      | 17           |
| 6A                                | 2004 | 4/30-5/20 | 225                | 558                   | 225            | 21.3      | 157     | 563         | 29      | 18           |
| 6A                                | 2005 | 4/22-4/28 | 275                | 1664                  | 285            | 16.3      | 240     | 982         | 76      | 32           |
| 6A                                | 2005 | 4/29-5/19 | 225                | 707                   | 228            | 20.9      | 198     | 858         | 40      | 20           |
| 6A                                | 2006 | 4/28-5/04 | 275                | 1784                  | 275            | 15.4      | 230     | 914         | 45      | 20           |
| 6A                                | 2006 | 5/05-5/25 | 275                | 250                   | 275            | 27.6      | 228     | 925         | 52      | 23           |
| 6A                                | 2007 | 4/27-5/03 | 300                | 1706                  | 300            | 17.2      | 245     | 854         | 55      | 22           |
| 6A                                | 2007 | 5/04-5/24 | 300                | 322                   | 300            | 33.5      | 241     | 1012        | 42      | 17           |
| 6A                                | 2008 | 4/25-5/01 | 350                | 1684                  | 350            | 20.4      | 304     | 1343        | 46      | 15           |
| 6A                                | 2008 | 5/02-5/22 | 350                | 226                   | 350            | 38.5      | 296     | 1138        | 24      | 8            |
| 6B                                | 2004 | 4/23-4/29 | 100                | 445                   | 100            | 20.0      | 80      | 329         | 16      | 20           |
| 6B                                | 2004 | 4/30-5/20 | 75                 | 52                    | 75             | 44.2      | 64      | 230         | 9       | 14           |
| 6B                                | 2005 | 4/22-4/28 | 100                | 346                   | 100            | 26.3      | 77      | 221         | 36      | 47           |
| 6B                                | 2005 | 4/29-5/19 | 75                 | 80                    | 75             | 47.5      | 51      | 172         | 12      | 24           |
| 6B                                | 2006 | 4/28-5/04 | 100                | 394                   | 100            | 23.9      | 85      | 344         | 20      | 24           |
| 6B                                | 2006 | 5/05-5/25 | 100                | 73                    | 100            | 47.9      | 77      | 335         | 12      | 16           |
| 6B                                | 2007 | 4/27-5/03 | 100                | 373                   | 100            | 26.0      | 87      | 370         | 20      | 23           |
| 6B                                | 2007 | 5/04-5/24 | 125                | 45                    | 125            | 73.3      | 99      | 418         | 22      | 22           |
| 6B                                | 2008 | 4/25-5/01 | 100                | 355                   | 100            | 23.7      | 92      | 408         | 21      | 23           |
| 6B                                | 2008 | 5/02-5/22 | 125                | 47                    | 125            | 70.2      | 96      | 357         | 4       | 4            |
| 7                                 | 2004 | 4/23-5/20 | 275                | 397                   | 275            | 41.8      | 199     | 928         | 31      | 16           |
| 7                                 | 2005 | 4/22-5/19 | 275                | 395                   | 278            | 38.2      | 205     | 879         | 52      | 25           |
| 7                                 | 2006 | 4/28-5/25 | 275                | 433                   | 275            | 43.9      | 220     | 906         | 37      | 17           |
| 7                                 | 2007 | 4/27-5/03 | 150                | 388                   | 150            | 27.3      | 133     | 505         | 47      | 35           |
| 7                                 | 2007 | 5/04-5/24 | 150                | 68                    | 150            | 80.9      | 115     | 481         | 25      | 22           |
| 7                                 | 2008 | 4/25-5/01 | 150                | 402                   | 150            | 27.9      | 124     | 468         | 24      | 19           |
| 7                                 | 2008 | 5/02-5/22 | 175                | 58                    | 175            | 67.2      | 137     | 695         | 17      | 12           |
| 8/10                              | 2004 | 4/23-5/20 | 300                | 1600                  | 300            | 17.5      | 253     | 1142        | 49      | 19           |
| 8/10                              | 2005 | 4/22-5/19 | 300                | 1801                  | 301            | 16.0      | 276     | 1185        | 67      | 24           |
| 8/10                              | 2006 | 4/28-5/25 | 325                | 1507                  | 325            | 20.4      | 290     | 1368        | 46      | 16           |
| 8/10                              | 2007 | 4/27-5/03 | 200                | 1110                  | 200            | 17.9      | 164     | 669         | 50      | 30           |
| 8/10                              | 2007 | 5/04-5/24 | 125                | 160                   | 125            | 33.8      | 98      | 369         | 13      | 13           |
| 8/10                              | 2008 | 4/25-5/01 | 200                | 1002                  | 200            | 18.8      | 177     | 774         | 66      | 37           |
| 8/10                              | 2008 | 5/02-5/22 | 125                | 82                    | 125            | 42.7      | 104     | 498         | 13      | 13           |
| 9                                 | 2004 | 4/23-5/20 | 40                 | 60                    | 40             | 33.3      | 27      | 109         | 7       | 26           |

CN = Camp Navajo

# Turkey Hunt Data

## 5-Year: 2004-2008 Harvest

| Unit                              | Year | Dates     | Permits Authorized | 1st Choice Applicants | Permits Issued | Draw Odds | Hunters | Hunter Days | Harvest | Hunt Success |
|-----------------------------------|------|-----------|--------------------|-----------------------|----------------|-----------|---------|-------------|---------|--------------|
| <b>SPRING GENERAL (continued)</b> |      |           |                    |                       |                |           |         |             |         |              |
| 9                                 | 2005 | 4/22-5/19 | 40                 | 52                    | 41             | 44.2      | 33      | 96          | 18      | 55           |
| 9                                 | 2006 | 4/28-5/25 | 40                 | 71                    | 40             | 31.0      | 32      | 97          | 17      | 53           |
| 9                                 | 2007 | 4/27-5/03 | 25                 | 113                   | 25             | 22.1      | 21      | 66          | 13      | 62           |
| 9                                 | 2007 | 5/04-5/24 | 25                 | 13                    | 25             | 30.8      | 22      | 117         | 3       | 14           |
| 9                                 | 2008 | 4/25-5/01 | 35                 | 108                   | 35             | 31.5      | 26      | 120         | 6       | 23           |
| 9                                 | 2008 | 5/02-5/22 | 35                 | 20                    | 35             | 85.0      | 30      | 118         | 5       | 17           |
| 12A                               | 2004 | 4/23-4/29 | 350                | 551                   | 350            | 51.2      | 239     | 986         | 14      | 6            |
| 12A                               | 2004 | 4/30-5/20 | 350                | 269                   | 350            | 71.7      | 287     | 1161        | 22      | 8            |
| 12A                               | 2005 | 4/22-4/28 | 350                | 455                   | 352            | 62.0      | 212     | 818         | 10      | 5            |
| 12A                               | 2005 | 4/29-5/19 | 350                | 200                   | 350            | 88.5      | 227     | 993         | 9       | 4            |
| 12A                               | 2006 | 4/28-5/04 | 225                | 253                   | 225            | 71.9      | 167     | 630         | 33      | 20           |
| 12A                               | 2006 | 5/05-5/25 | 225                | 80                    | 225            | 100.0     | 177     | 721         | 27      | 15           |
| 12A                               | 2007 | 4/27-5/03 | 250                | 230                   | 250            | 81.7      | 186     | 763         | 53      | 28           |
| 12A                               | 2007 | 5/04-5/24 | 250                | 79                    | 250            | 100.0     | 155     | 573         | 17      | 11           |
| 12A                               | 2008 | 4/25-5/01 | 300                | 202                   | 300            | 87.1      | 203     | 832         | 48      | 24           |
| 12A                               | 2008 | 5/02-5/22 | 300                | 42                    | 300            | 100.0     | 215     | 879         | 32      | 15           |
| 13A                               | 2004 | 4/23-5/20 | 20                 | 38                    | 20             | 39.5      | 16      | 70          | 2       | 13           |
| 13A                               | 2005 | 4/22-5/19 | 20                 | 43                    | 20             | 39.5      | 15      | 51          | 7       | 47           |
| 13A                               | 2006 | 4/28-5/25 | 20                 | 33                    | 20             | 51.5      | 16      | 33          | 5       | 31           |
| 13A                               | 2007 | 4/27-5/03 | 15                 | 32                    | 15             | 46.9      | 12      | 38          | 3       | 25           |
| 13A                               | 2007 | 5/04-5/24 | 10                 | 5                     | 10             | 100.0     | 3       | 10          | 0       | 0            |
| 13A                               | 2008 | 4/25-5/01 | 20                 | 22                    | 20             | 86.4      | 15      | 55          | 5       | 33           |
| 13A                               | 2008 | 5/02-5/22 | 10                 | 4                     | 10             | 100.0     | 9       | 21          | 1       | 11           |
| 13BS                              | 2004 | 4/23-4/29 | 15                 | 91                    | 15             | 15.4      | 12      | 37          | 10      | 83           |
| 13BS                              | 2004 | 4/30-5/20 | 15                 | 23                    | 15             | 47.8      | 12      | 39          | 6       | 50           |
| 13BS                              | 2005 | 4/22-4/28 | 15                 | 73                    | 17             | 19.2      | 12      | 32          | 5       | 42           |
| 13BS                              | 2005 | 4/29-5/19 | 15                 | 14                    | 15             | 42.9      | 13      | 44          | 3       | 23           |
| 13BS                              | 2006 | 4/28-5/04 | 15                 | 48                    | 15             | 31.3      | 15      | 51          | 5       | 33           |
| 13BS                              | 2006 | 5/05-5/25 | 15                 | 22                    | 15             | 40.9      | 15      | 56          | 6       | 40           |
| 13BS                              | 2007 | 4/27-5/03 | 15                 | 35                    | 15             | 40.0      | 7       | 22          | 5       | 71           |
| 13BS                              | 2007 | 5/04-5/24 | 15                 | 11                    | 15             | 72.7      | 15      | 45          | 8       | 53           |
| 13BS                              | 2008 | 4/25-5/01 | 20                 | 42                    | 20             | 40.5      | 17      | 74          | 1       | 6            |
| 13BS                              | 2008 | 5/02-5/22 | 15                 | 6                     | 15             | 100.0     | 11      | 45          | 2       | 18           |
| 17/18B                            | 2004 | 4/23-5/20 | 25                 | 275                   | 25             | 9.1       | 22      | 89          | 9       | 41           |
| 17/18B                            | 2005 | 4/22-5/19 | 25                 | 265                   | 25             | 9.4       | 23      | 91          | 14      | 61           |
| 17/18B                            | 2006 | 4/28-5/25 | 30                 | 223                   | 30             | 13.5      | 30      | 76          | 14      | 47           |
| 17/18B                            | 2007 | 4/27-5/03 | 15                 | 136                   | 15             | 11.0      | 14      | 49          | 5       | 36           |
| 17/18B                            | 2007 | 5/04-5/24 | 20                 | 50                    | 20             | 20.0      | 12      | 28          | 6       | 50           |
| 17/18B                            | 2008 | 4/25-5/01 | 15                 | 139                   | 15             | 10.8      | 15      | 54          | 1       | 7            |
| 17/18B                            | 2008 | 5/02-5/22 | 20                 | 24                    | 20             | 29.2      | 17      | 67          | 3       | 18           |
| 22                                | 2004 | 4/23-5/20 | 125                | 452                   | 125            | 25.9      | 94      | 281         | 29      | 31           |
| 22                                | 2005 | 4/22-5/19 | 125                | 455                   | 132            | 23.7      | 115     | 439         | 41      | 36           |
| 22                                | 2006 | 4/28-5/25 | 125                | 387                   | 125            | 28.7      | 91      | 359         | 7       | 8            |
| 22                                | 2007 | 4/27-5/03 | 75                 | 235                   | 75             | 28.5      | 65      | 223         | 10      | 15           |
| 22                                | 2007 | 5/04-5/24 | 75                 | 34                    | 75             | 61.8      | 61      | 197         | 14      | 23           |
| 22                                | 2008 | 4/25-5/01 | 90                 | 237                   | 90             | 28.7      | 77      | 349         | 15      | 19           |
| 22                                | 2008 | 5/02-5/22 | 90                 | 37                    | 90             | 67.6      | 80      | 321         | 16      | 20           |
| 23                                | 2004 | 4/23-4/29 | 200                | 895                   | 200            | 21.5      | 166     | 694         | 26      | 16           |
| 23                                | 2004 | 4/30-5/20 | 200                | 229                   | 200            | 33.2      | 165     | 610         | 33      | 20           |
| 23                                | 2005 | 4/22-4/28 | 200                | 835                   | 203            | 22.6      | 173     | 657         | 46      | 27           |
| 23                                | 2005 | 4/29-5/19 | 200                | 381                   | 208            | 33.3      | 161     | 527         | 15      | 9            |
| 23                                | 2006 | 4/28-5/04 | 200                | 1057                  | 200            | 18.1      | 160     | 569         | 33      | 21           |
| 23                                | 2006 | 5/05-5/25 | 200                | 149                   | 200            | 43.0      | 153     | 548         | 40      | 26           |
| 23                                | 2007 | 4/27-5/03 | 200                | 1032                  | 200            | 18.7      | 183     | 682         | 48      | 26           |
| 23                                | 2007 | 5/04-5/24 | 225                | 175                   | 225            | 42.3      | 180     | 690         | 32      | 18           |
| 23                                | 2008 | 4/25-5/01 | 225                | 1135                  | 225            | 19.4      | 201     | 783         | 46      | 23           |
| 23                                | 2008 | 5/02-5/22 | 225                | 103                   | 225            | 54.4      | 181     | 624         | 36      | 20           |
| 27                                | 2004 | 4/23-4/29 | 425                | 1281                  | 425            | 29.1      | 333     | 1202        | 105     | 32           |
| 27                                | 2004 | 4/30-5/20 | 425                | 336                   | 425            | 57.1      | 323     | 1169        | 65      | 20           |
| 27                                | 2005 | 4/22-4/28 | 425                | 1270                  | 428            | 30.2      | 364     | 1166        | 143     | 39           |
| 27                                | 2005 | 4/29-5/19 | 425                | 413                   | 432            | 50.4      | 305     | 937         | 95      | 31           |
| 27                                | 2006 | 4/28-5/04 | 475                | 1249                  | 475            | 30.4      | 401     | 1402        | 138     | 34           |

CN = Camp Navajo

# Turkey Hunt Data

## 5-Year: 2004-2008 Harvest

| Unit                              | Year | Dates     | Permits Authorized | 1st Choice Applicants | Permits Issued | Draw Odds | Hunters | Hunter Days | Harvest | Hunt Success |
|-----------------------------------|------|-----------|--------------------|-----------------------|----------------|-----------|---------|-------------|---------|--------------|
| <b>SPRING GENERAL (continued)</b> |      |           |                    |                       |                |           |         |             |         |              |
| 27                                | 2006 | 5/05-5/25 | 475                | 190                   | 475            | 78.9      | 376     | 1434        | 99      | 26           |
| 27                                | 2007 | 4/27-5/03 | 550                | 1252                  | 550            | 36.3      | 447     | 1543        | 149     | 33           |
| 27                                | 2007 | 5/04-5/24 | 525                | 185                   | 525            | 81.1      | 403     | 1490        | 79      | 20           |
| 27                                | 2008 | 4/25-5/01 | 625                | 1271                  | 625            | 37.5      | 503     | 1741        | 101     | 20           |
| 27                                | 2008 | 5/02-5/22 | 550                | 90                    | 550            | 100.0     | 436     | 1828        | 92      | 21           |
| 29                                | 2008 | 4/25-5/01 | 1                  | 61                    | 1              | 1.6       | 1       | 4           | 1       | 100          |
| 29                                | 2008 | 5/02-5/22 | 1                  | 11                    | 1              | .0        | 1       | 2           | 1       | 100          |
| 35A                               | 2004 | 4/23-5/20 | 2                  | 194                   | 2              | 1.0       | 2       | 24          | 0       | 0            |
| 35A                               | 2005 | 4/22-5/19 | 2                  | 227                   | 2              | .9        | 2       | 4           | 2       | 100          |
| 35A                               | 2006 | 4/28-5/25 | 6                  | 285                   | 6              | 2.1       | 6       | 17          | 4       | 67           |
| 35A                               | 2007 | 4/27-5/03 | 3                  | 220                   | 3              | 1.4       | 3       | 5           | 3       | 100          |
| 35A                               | 2007 | 5/04-5/24 | 3                  | 56                    | 3              | 3.6       | 3       | 14          | 2       | 67           |
| 35A                               | 2008 | 4/25-5/01 | 3                  | 238                   | 3              | 1.3       | 3       | 3           | 3       | 100          |
| 35A                               | 2008 | 5/02-5/22 | 3                  | 45                    | 3              | .0        | 3       | 9           | 3       | 100          |
| CN                                | 2004 | 4/23-5/20 | 10                 | 10                    | 10             | 100.0     | 8       | 27          | 2       | 25           |
| CN                                | 2004 | 4/23-5/20 | 5                  | 5                     | 5              | 100.0     | 4       | 13          | 0       | 0            |
| CN                                | 2005 | 4/22-5/19 | 10                 | 3                     | 15             | 100.0     | 15      | 69          | 8       | 53           |
| CN                                | 2005 | 4/22-5/19 | 5                  | 13                    | 6              | 46.2      | 5       | 11          | 0       | 0            |
| CN                                | 2006 | 4/28-5/25 | 10                 | 16                    | 15             | 93.8      | 4       | 8           | 0       | 0            |
| CN                                | 2006 | 4/28-5/25 | 5                  | 18                    | 6              | 27.8      | 5       | 11          | 2       | 40           |
| CN                                | 2007 | 4/27-5/24 | 10                 | 10                    | 15             | 100.0     | 6       | 19          | 0       | 0            |
| CN                                | 2007 | 4/27-5/24 | 5                  | 18                    | 6              | 33.3      | 0       | 0           | 0       | —            |
| CN                                | 2008 | 4/25-5/22 | 15                 | 4                     | 12             | 100.0     | 5       | 15          | 2       | 40           |
| CN                                | 2008 | 4/25-5/22 | 6                  | 3                     | 5              | 100.0     | 3       | 5           | 0       | 0            |
| FTHU                              | 2006 | 4/28-5/25 | 2                  | 14                    | 2              | 14.3      | 2       | 6           | 2       | 100          |
| FTHU                              | 2007 | 4/27-5/24 | 1                  | 2                     | 1              | 50.0      | 1       | 1           | 1       | 100          |
| FTHU                              | 2007 | 4/27-5/24 | 1                  | 8                     | 1              | 12.5      | 1       | 1           | 1       | 100          |
| FTHU                              | 2008 | 4/25-5/22 | 3                  | 26                    | 3              | 11.5      | 1       | 4           | 1       | 100          |
| <b>SPRING JUNIORS ONLY</b>        |      |           |                    |                       |                |           |         |             |         |              |
| 1                                 | 2004 | 4/23-4/29 | 25                 | 99                    | 25             | 25.3      | 23      | 84          | 7       | 30           |
| 1                                 | 2005 | 4/22-5/19 | 25                 | 95                    | 25             | 25.3      | 23      | 65          | 3       | 13           |
| 1                                 | 2006 | 4/21-5/25 | 25                 | 93                    | 25             | 24.7      | 25      | 64          | 11      | 44           |
| 1                                 | 2007 | 4/20-5/24 | 35                 | 86                    | 35             | 40.7      | 33      | 70          | 15      | 45           |
| 1                                 | 2008 | 4/18-5/22 | 50                 | 83                    | 50             | 51.8      | 43      | 126         | 14      | 33           |
| 3C                                | 2007 | 4/20-5/24 | 25                 | 60                    | 25             | 41.7      | 25      | 104         | 19      | 76           |
| 3C                                | 2008 | 4/18-5/22 | 50                 | 96                    | 50             | 49.0      | 37      | 142         | 17      | 46           |
| 5B                                | 2004 | 4/23-5/20 | 25                 | 33                    | 25             | 72.7      | 14      | 67          | 0       | 0            |
| 5B                                | 2005 | 4/22-5/19 | 25                 | 40                    | 25             | 52.5      | 20      | 59          | 0       | 0            |
| 5B                                | 2006 | 4/21-5/25 | 25                 | 30                    | 25             | 30.0      | 22      | 128         | 6       | 27           |
| 5B                                | 2007 | 4/20-5/24 | 25                 | 46                    | 25             | 45.7      | 20      | 105         | 5       | 25           |
| 5B                                | 2008 | 4/18-5/22 | 50                 | 49                    | 50             | 71.4      | 44      | 183         | 6       | 14           |
| 6A                                | 2004 | 4/23-4/29 | 25                 | 102                   | 25             | 24.5      | 20      | 52          | 2       | 10           |
| 6A                                | 2004 | 4/30-5/20 | 25                 | 11                    | 25             | 45.5      | 21      | 52          | 2       | 10           |
| 6A                                | 2005 | 4/22-4/28 | 25                 | 74                    | 25             | 31.1      | 22      | 86          | 11      | 50           |
| 6A                                | 2005 | 4/29-5/19 | 25                 | 21                    | 25             | 52.4      | 18      | 45          | 0       | 0            |
| 6A                                | 2006 | 4/21-5/25 | 25                 | 131                   | 25             | 19.1      | 16      | 52          | 5       | 31           |
| 6A                                | 2007 | 4/20-5/24 | 25                 | 114                   | 25             | 21.1      | 23      | 59          | 7       | 30           |
| 6A                                | 2008 | 4/18-5/22 | 25                 | 102                   | 25             | 24.5      | 23      | 114         | 7       | 30           |
| 8/10                              | 2004 | 4/23-5/20 | 25                 | 57                    | 25             | 42.1      | 19      | 54          | 4       | 21           |
| 8/10                              | 2005 | 4/22-5/19 | 25                 | 65                    | 25             | 38.5      | 25      | 125         | 4       | 16           |
| 8/10                              | 2006 | 4/21-5/25 | 40                 | 79                    | 40             | 44.3      | 34      | 107         | 11      | 32           |
| 8/10                              | 2007 | 4/20-5/24 | 40                 | 103                   | 40             | 38.8      | 38      | 155         | 14      | 37           |
| 8/10                              | 2008 | 4/18-5/22 | 50                 | 97                    | 50             | 48.5      | 41      | 196         | 7       | 17           |
| 23                                | 2006 | 4/21-5/25 | 25                 | 76                    | 25             | 30.3      | 23      | 82          | 5       | 22           |
| 23                                | 2007 | 4/20-5/24 | 25                 | 76                    | 25             | 32.9      | 23      | 50          | 18      | 78           |
| 23                                | 2008 | 4/18-5/22 | 50                 | 98                    | 50             | 50.0      | 44      | 135         | 19      | 43           |
| 27                                | 2004 | 4/23-5/20 | 25                 | 39                    | 25             | 48.7      | 22      | 64          | 8       | 36           |
| 27                                | 2005 | 4/22-5/19 | 25                 | 32                    | 28             | 56.3      | 14      | 70          | 6       | 43           |
| 27                                | 2006 | 4/21-5/25 | 25                 | 52                    | 25             | 44.2      | 23      | 60          | 13      | 57           |
| 27                                | 2007 | 4/20-5/24 | 50                 | 78                    | 50             | 55.1      | 40      | 93          | 27      | 68           |
| 27                                | 2008 | 4/18-5/22 | 75                 | 57                    | 75             | 89.5      | 63      | 198         | 12      | 19           |

CN = Camp Navajo

# Turkey Hunt Data

## 5-Year: 2004-2008 Harvest

| Unit                | Year | Dates       | Permits Authorized | 1st Choice Applicants | Permits Issued | Draw Odds | Hunters | Hunter Days | Harvest | Hunt Success |
|---------------------|------|-------------|--------------------|-----------------------|----------------|-----------|---------|-------------|---------|--------------|
| <b>FALL GENERAL</b> |      |             |                    |                       |                |           |         |             |         |              |
| 1                   | 2004 | 10/08-10/14 | 625                | 2408                  | 625            | 25.7      | 466     | 1483        | 57      | 12           |
| 1                   | 2005 | 10/07-10/13 | 625                | 1847                  | 625            | 33.5      | 491     | 1449        | 77      | 16           |
| 1                   | 2006 | 10/13-10/19 | 625                | 2329                  | 624            | 26.0      | 453     | 1279        | 65      | 14           |
| 1                   | 2007 | 10/12-10/18 | 625                | 1358                  | 625            | 45.2      | 487     | 1494        | 96      | 20           |
| 1                   | 2008 | 10/03-10/09 | 625                | 1004                  | 625            | 60.9      | 473     | 1411        | 84      | 18           |
| 4                   | 2004 | 10/08-10/14 | 350                | 1313                  | 350            | 24.5      | 257     | 797         | 28      | 11           |
| 4                   | 2005 | 10/07-10/13 | 350                | 1059                  | 350            | 31.4      | 283     | 792         | 58      | 20           |
| 4                   | 2006 | 10/13-10/19 | 375                | 1307                  | 375            | 27.9      | 297     | 826         | 52      | 18           |
| 4                   | 2007 | 10/12-10/18 | 425                | 888                   | 424            | 44.7      | 342     | 1052        | 84      | 25           |
| 4                   | 2008 | 10/03-10/09 | 525                | 736                   | 525            | 64.7      | 421     | 1289        | 74      | 18           |
| 5A                  | 2004 | 10/08-10/14 | 300                | 916                   | 300            | 26.1      | 246     | 763         | 32      | 13           |
| 5A                  | 2005 | 10/07-10/13 | 300                | 784                   | 300            | 32.0      | 238     | 652         | 76      | 32           |
| 5A                  | 2006 | 10/13-10/19 | 400                | 1148                  | 400            | 29.4      | 329     | 897         | 48      | 15           |
| 5A                  | 2007 | 10/12-10/18 | 450                | 714                   | 450            | 54.6      | 390     | 1208        | 40      | 10           |
| 5A                  | 2008 | 10/03-10/09 | 450                | 523                   | 450            | 68.6      | 353     | 1089        | 51      | 14           |
| 5B                  | 2004 | 10/08-10/14 | 75                 | 455                   | 75             | 16.5      | 58      | 146         | 4       | 7            |
| 5B                  | 2005 | 10/07-10/13 | 25                 | 131                   | 25             | 19.1      | 23      | 60          | 8       | 35           |
| 5BN                 | 2006 | 10/13-10/19 | 35                 | 255                   | 35             | 13.7      | 19      | 39          | 2       | 11           |
| 5BN                 | 2007 | 10/12-10/18 | 35                 | 128                   | 35             | 27.3      | 26      | 66          | 6       | 23           |
| 5BN                 | 2008 | 10/03-10/09 | 35                 | 88                    | 35             | 38.6      | 27      | 81          | 5       | 19           |
| 5BS                 | 2008 | 10/03-10/09 | 75                 | 178                   | 75             | 42.1      | 66      | 228         | 5       | 8            |
| 6A                  | 2004 | 10/08-10/14 | 425                | 2584                  | 425            | 16.1      | 353     | 1070        | 44      | 12           |
| 6A                  | 2005 | 10/07-10/13 | 475                | 2055                  | 475            | 22.8      | 393     | 1072        | 112     | 28           |
| 6A                  | 2006 | 10/13-10/19 | 475                | 2420                  | 475            | 18.8      | 380     | 1066        | 40      | 11           |
| 6A                  | 2007 | 10/12-10/18 | 475                | 1519                  | 475            | 30.9      | 407     | 1323        | 73      | 18           |
| 6A                  | 2008 | 10/03-10/09 | 475                | 1114                  | 475            | 41.2      | 381     | 1136        | 54      | 14           |
| 6B                  | 2004 | 10/08-10/14 | 250                | 425                   | 250            | 34.4      | 210     | 595         | 44      | 21           |
| 6B                  | 2005 | 10/07-10/13 | 250                | 442                   | 250            | 35.5      | 199     | 549         | 58      | 29           |
| 6B                  | 2006 | 10/13-10/19 | 350                | 475                   | 348            | 37.7      | 282     | 776         | 22      | 8            |
| 6B                  | 2007 | 10/12-10/18 | 350                | 340                   | 350            | 68.2      | 283     | 876         | 33      | 12           |
| 6B                  | 2008 | 10/03-10/09 | 300                | 293                   | 300            | 72.0      | 240     | 690         | 43      | 18           |
| 7                   | 2006 | 10/13-10/19 | 75                 | 352                   | 75             | 20.2      | 57      | 168         | 13      | 23           |
| 7                   | 2007 | 10/12-10/18 | 125                | 303                   | 125            | 38.3      | 79      | 200         | 37      | 47           |
| 7                   | 2008 | 10/03-10/09 | 200                | 242                   | 200            | 69.0      | 171     | 533         | 52      | 30           |
| 8/10                | 2004 | 10/08-10/14 | 500                | 2132                  | 500            | 22.2      | 410     | 1294        | 71      | 17           |
| 8/10                | 2005 | 10/07-10/13 | 550                | 1651                  | 552            | 31.9      | 483     | 1439        | 225     | 47           |
| 8/10                | 2006 | 10/13-10/19 | 600                | 2341                  | 600            | 24.2      | 470     | 1448        | 69      | 15           |
| 8/10                | 2007 | 10/12-10/18 | 700                | 1542                  | 700            | 39.7      | 600     | 2082        | 43      | 7            |
| 8/10                | 2008 | 10/03-10/09 | 700                | 894                   | 700            | 70.7      | 591     | 1971        | 79      | 13           |
| 9                   | 2007 | 10/12-10/18 | 25                 | 114                   | 25             | 20.2      | 24      | 76          | 13      | 54           |
| 9                   | 2008 | 10/03-10/09 | 25                 | 110                   | 25             | 22.7      | 18      | 48          | 11      | 61           |
| 12A                 | 2004 | 10/08-10/14 | 750                | 1145                  | 750            | 54.3      | 524     | 1758        | 94      | 18           |
| 12A                 | 2005 | 10/07-10/13 | 750                | 787                   | 750            | 78.0      | 532     | 1531        | 218     | 41           |
| 12A                 | 2006 | 10/13-10/19 | 750                | 816                   | 749            | 73.3      | 493     | 1416        | 138     | 28           |
| 12A                 | 2007 | 10/12-10/18 | 1000               | 657                   | 1000           | 100.0     | 725     | 2264        | 233     | 32           |
| 12A                 | 2008 | 10/03-10/09 | 1000               | 427                   | 783            | 100.0     | 536     | 1513        | 156     | 29           |
| 13A                 | 2006 | 10/13-10/19 | 5                  | 45                    | 5              | 11.1      | 2       | 7           | 2       | 100          |
| 13A                 | 2007 | 10/12-10/18 | 5                  | 24                    | 5              | 16.7      | 5       | 8           | 5       | 100          |
| 13A                 | 2008 | 10/03-10/09 | 10                 | 19                    | 10             | 47.4      | 8       | 10          | 0       | 0            |
| 13B                 | 2004 | 10/08-10/14 | 10                 | 70                    | 10             | 14.3      | 10      | 33          | 3       | 30           |
| 13B                 | 2005 | 10/07-10/13 | 5                  | 66                    | 5              | 7.6       | 5       | 14          | 3       | 60           |
| 13B                 | 2006 | 10/13-10/19 | 5                  | 41                    | 5              | 12.2      | 2       | 3           | 0       | 0            |
| 13B                 | 2007 | 10/12-10/18 | 5                  | 15                    | 5              | 13.3      | 5       | 10          | 2       | 40           |
| 13B                 | 2008 | 10/03-10/09 | 5                  | 13                    | 5              | 38.5      | 2       | 3           | 0       | 0            |
| 17/18B              | 2006 | 10/13-10/19 | 15                 | 147                   | 15             | 10.2      | 7       | 7           | 5       | 71           |
| 17/18B              | 2007 | 10/12-10/18 | 25                 | 148                   | 25             | 16.9      | 25      | 83          | 2       | 8            |
| 17/18B              | 2008 | 10/03-10/09 | 25                 | 107                   | 25             | 23.4      | 23      | 82          | 7       | 30           |
| 22                  | 2004 | 10/08-10/14 | 75                 | 351                   | 75             | 21.4      | 52      | 127         | 5       | 10           |
| 22                  | 2005 | 10/07-10/13 | 75                 | 291                   | 75             | 24.7      | 63      | 188         | 19      | 30           |
| 22                  | 2006 | 10/13-10/19 | 100                | 406                   | 100            | 23.4      | 67      | 187         | 13      | 19           |
| 22                  | 2007 | 10/12-10/18 | 125                | 217                   | 125            | 51.2      | 81      | 217         | 31      | 38           |

CN = Camp Navajo

# Turkey Hunt Data

## 5-Year: 2004-2008 Harvest

| Unit                                                                  | Year | Dates       | Permits Authorized | 1st Choice Applicants | Permits Issued | Draw Odds | Hunters | Hunter Days | Harvest | Hunt Success |
|-----------------------------------------------------------------------|------|-------------|--------------------|-----------------------|----------------|-----------|---------|-------------|---------|--------------|
| <b>FALL GENERAL (continued)</b>                                       |      |             |                    |                       |                |           |         |             |         |              |
| 22                                                                    | 2008 | 10/03-10/09 | 150                | 262                   | 150            | 56.1      | 123     | 312         | 27      | 22           |
| 23                                                                    | 2004 | 10/08-10/14 | 700                | 1492                  | 700            | 37.7      | 558     | 1699        | 83      | 15           |
| 23                                                                    | 2005 | 10/07-10/13 | 700                | 1415                  | 700            | 42.0      | 550     | 1415        | 164     | 30           |
| 23                                                                    | 2006 | 10/13-10/19 | 700                | 1625                  | 697            | 37.0      | 535     | 1435        | 107     | 20           |
| 23                                                                    | 2007 | 10/12-10/18 | 700                | 1225                  | 699            | 50.9      | 579     | 1569        | 236     | 41           |
| 23                                                                    | 2008 | 10/03-10/09 | 700                | 1141                  | 700            | 58.8      | 592     | 1815        | 116     | 20           |
| 27                                                                    | 2004 | 10/08-10/14 | 725                | 1164                  | 725            | 43.3      | 532     | 1625        | 74      | 14           |
| 27                                                                    | 2005 | 10/07-10/13 | 725                | 1035                  | 725            | 51.1      | 551     | 1573        | 102     | 19           |
| 27                                                                    | 2006 | 10/13-10/19 | 800                | 1203                  | 799            | 46.7      | 577     | 1670        | 64      | 11           |
| 27                                                                    | 2007 | 10/12-10/18 | 800                | 730                   | 800            | 71.8      | 606     | 1789        | 153     | 25           |
| 27                                                                    | 2008 | 10/03-10/09 | 800                | 669                   | 800            | 91.5      | 634     | 1885        | 138     | 22           |
| <b>FALL Juniors Only (all 2008 tags were issued over-the-counter)</b> |      |             |                    |                       |                |           |         |             |         |              |
| 1                                                                     | 2004 | 10/08-10/14 | 25                 | 76                    | 25             | 27.6      | 16      | 34          | 0       | 0            |
| 1                                                                     | 2005 | 10/07-10/13 | 25                 | 53                    | 25             | 47.2      | 20      | 61          | 2       | 10           |
| 1                                                                     | 2006 | 10/13-10/19 | 25                 | 68                    | 25             | 36.8      | 15      | 43          | 3       | 20           |
| 1                                                                     | 2007 | 10/12-10/18 | 25                 | 40                    | 25             | 62.5      | 20      | 42          | 2       | 10           |
| 1                                                                     | 2008 | 10/03-10/09 | OTC                | –                     | 336            | –         | 36      | 102         | 3       | 8            |
| 5B                                                                    | 2005 | 10/07-10/13 | 25                 | 43                    | 25             | 55.8      | 18      | 43          | 4       | 22           |
| 5BS                                                                   | 2006 | 10/13-10/19 | 50                 | 85                    | 50             | 52.9      | 43      | 102         | 14      | 33           |
| 5BS                                                                   | 2007 | 10/12-10/18 | 50                 | 65                    | 50             | 72.3      | 39      | 97          | 8       | 21           |
| 6A                                                                    | 2004 | 10/08-10/14 | 25                 | 123                   | 25             | 20.3      | 21      | 63          | 0       | 0            |
| 6A                                                                    | 2008 | 10/03-10/09 | OTC                | –                     | 336            | –         | 99      | 300         | 8       | 8            |
| 8                                                                     | 2008 | 10/03-10/09 | OTC                | –                     | 336            | –         | 44      | 124         | 0       | 0            |
| 8/10                                                                  | 2006 | 10/13-10/19 | 50                 | 69                    | 50             | 56.5      | 29      | 98          | 0       | 0            |
| 8/10                                                                  | 2007 | 10/12-10/18 | 50                 | 49                    | 50             | 79.6      | 40      | 125         | 2       | 5            |
| 10                                                                    | 2008 | 10/03-10/09 | OTC                | –                     | 336            | –         | 28      | 58          | 0       | 0            |
| 12A                                                                   | 2004 | 10/08-10/14 | 25                 | 19                    | 25             | 89.5      | 14      | 36          | 0       | 0            |
| 12A                                                                   | 2005 | 10/07-10/13 | 25                 | 16                    | 25             | 100.0     | 13      | 42          | 0       | 0            |
| 12A                                                                   | 2008 | 10/03-10/09 | OTC                | –                     | 336            | –         | 19      | 72          | 6       | 32           |
| 23                                                                    | 2008 | 10/03-10/09 | OTC                | –                     | 336            | –         | 69      | 212         | 17      | 25           |
| 27                                                                    | 2004 | 10/08-10/14 | 25                 | 32                    | 25             | 65.6      | 21      | 63          | 4       | 19           |
| 27                                                                    | 2005 | 10/07-10/13 | 25                 | 25                    | 25             | 92.0      | 20      | 45          | 10      | 50           |
| 27                                                                    | 2006 | 10/13-10/19 | 25                 | 24                    | 23             | 58.3      | 13      | 19          | 2       | 15           |
| 27                                                                    | 2007 | 10/12-10/18 | 25                 | 25                    | 25             | 84.0      | 15      | 40          | 0       | 0            |
| 27                                                                    | 2008 | 10/03-10/09 | OTC                | –                     | 336            | –         | 14      | 39          | 3       | 21           |

CN = Camp Navajo

## Fall Archery-only Turkey 2004-2008 (2008 data is preliminary)

| Unit  | Year | Hunters | Hunter Days | Harvest | Hunt Success |
|-------|------|---------|-------------|---------|--------------|
| 1     | 2004 | 375     | 1277        | 30      | 8            |
| 1     | 2005 | 296     | 1136        | 6       | 2            |
| 1     | 2006 | 264     | 985         | 19      | 7            |
| 1     | 2007 | 313     | 1416        | 19      | 6            |
| 1     | 2008 | 157     | 555         | 14      | 9            |
| 3B    | 2007 | 88      | 432         | 13      | 15           |
| 3B    | 2008 | 69      | 315         | 5       | 7            |
| 3B/3C | 2004 | 160     | 600         | 13      | 8            |
| 3B/3C | 2005 | 151     | 634         | 18      | 12           |
| 3B/3C | 2006 | 213     | 811         | 13      | 6            |
| 3C    | 2007 | 182     | 702         | 19      | 10           |
| 3C    | 2008 | 83      | 296         | 0       | 0            |
| 4     | 2004 | 160     | 570         | 0       | 0            |
| 4     | 2005 | 103     | 453         | 6       | 6            |
| 4     | 2006 | 129     | 457         | 6       | 5            |
| 4     | 2007 | 150     | 532         | 6       | 4            |
| 4     | 2008 | 116     | 490         | 0       | 0            |
| 5A    | 2004 | 147     | 738         | 4       | 3            |
| 5A    | 2005 | 181     | 773         | 18      | 10           |
| 5A    | 2006 | 155     | 586         | 0       | 0            |
| 5A    | 2007 | 257     | 952         | 0       | 0            |
| 5A    | 2008 | 153     | 555         | 5       | 3            |

# Turkey Hunt Data

*Fall Archery-only Turkey 2004-2008 (2008 data is preliminary)*

| Unit | Year | Hunters | Hunter Days | Harvest | Hunt Success |
|------|------|---------|-------------|---------|--------------|
| 5B   | 2004 | 173     | 544         | 9       | 5            |
| 5B   | 2005 | 109     | 501         | 6       | 6            |
| 5B   | 2006 | 167     | 599         | 0       | 0            |
| 5B   | 2007 | 188     | 733         | 0       | 0            |
| 5B   | 2008 | 106     | 500         | 9       | 8            |
| 6A   | 2004 | 337     | 1519        | 13      | 4            |
| 6A   | 2005 | 405     | 1674        | 12      | 3            |
| 6A   | 2006 | 386     | 1777        | 13      | 3            |
| 6A   | 2007 | 332     | 1334        | 13      | 4            |
| 6A   | 2008 | 282     | 1333        | 0       | 0            |
| 6B   | 2004 | 117     | 479         | 4       | 3            |
| 6B   | 2005 | 109     | 381         | 0       | 0            |
| 6B   | 2006 | 84      | 412         | 0       | 0            |
| 6B   | 2007 | 119     | 564         | 0       | 0            |
| 6B   | 2008 | 97      | 430         | 0       | 0            |
| 7    | 2004 | 147     | 652         | 9       | 6            |
| 7    | 2005 | 133     | 816         | 12      | 9            |
| 7    | 2006 | 225     | 1063        | 0       | 0            |
| 7    | 2007 | 119     | 695         | 0       | 0            |
| 7    | 2008 | 120     | 500         | 5       | 4            |
| 8    | 2004 | 198     | 768         | 13      | 7            |
| 8    | 2005 | 242     | 888         | 24      | 10           |
| 8    | 2006 | 270     | 1056        | 6       | 2            |
| 8    | 2007 | 113     | 507         | 6       | 5            |
| 8    | 2008 | 176     | 717         | 5       | 3            |
| 9    | 2004 | 26      | 95          | 0       | 0            |
| 9    | 2005 | 30      | 91          | 0       | 0            |
| 9    | 2006 | 26      | 109         | 0       | 0            |
| 9    | 2007 | 6       | 25          | 0       | 0            |
| 9    | 2008 | 28      | 69          | 5       | 18           |
| 10   | 2004 | 60      | 289         | 4       | 7            |
| 10   | 2005 | 97      | 369         | 6       | 6            |
| 10   | 2006 | 52      | 219         | 0       | 0            |
| 10   | 2007 | 25      | 144         | 0       | 0            |
| 10   | 2008 | 37      | 153         | 0       | 0            |
| 11M  | 2004 | 17      | 73          | 0       | 0            |
| 11M  | 2005 | 12      | 73          | 0       | 0            |
| 11M  | 2007 | 13      | 44          | 0       | 0            |
| 11M  | 2008 | 19      | 102         | 0       | 0            |
| 12A  | 2004 | 570     | 2861        | 30      | 5            |
| 12A  | 2005 | 550     | 2755        | 42      | 8            |
| 12A  | 2006 | 547     | 2827        | 19      | 3            |
| 12A  | 2007 | 382     | 2317        | 0       | 0            |
| 12A  | 2008 | 241     | 1356        | 9       | 4            |
| 17   | 2004 | 56      | 181         | 4       | 7            |
| 17   | 2005 | 48      | 290         | 0       | 0            |
| 17   | 2006 | 64      | 245         | 13      | 20           |
| 17   | 2007 | 6       | 25          | 0       | 0            |
| 17   | 2008 | 51      | 190         | 0       | 0            |
| 18B  | 2004 | 4       | 9           | 0       | 0            |
| 18B  | 2006 | 6       | 32          | 0       | 0            |
| 18B  | 2008 | 9       | 28          | 0       | 0            |
| 20A  | 2004 | 52      | 328         | 0       | 0            |
| 20A  | 2005 | 60      | 211         | 0       | 0            |
| 20A  | 2006 | 64      | 322         | 0       | 0            |
| 20A  | 2007 | 63      | 319         | 0       | 0            |
| 20A  | 2008 | 37      | 130         | 0       | 0            |
| 22   | 2004 | 91      | 293         | 9       | 10           |
| 22   | 2005 | 97      | 369         | 6       | 6            |
| 22   | 2006 | 109     | 373         | 6       | 6            |
| 22   | 2007 | 163     | 733         | 31      | 19           |
| 22   | 2008 | 125     | 444         | 5       | 4            |
| 23   | 2004 | 181     | 880         | 9       | 5            |
| 23   | 2005 | 193     | 689         | 12      | 6            |
| 23   | 2006 | 219     | 831         | 32      | 15           |

## Turkey Hunt Data

*Fall Archery-only Turkey 2004-2008 (2008 data is preliminary)*

| Unit    | Year | Hunters | Hunter Days | Harvest | Hunt Success |
|---------|------|---------|-------------|---------|--------------|
| 23      | 2007 | 357     | 1253        | 63      | 18           |
| 23      | 2008 | 291     | 1157        | 9       | 3            |
| 27      | 2004 | 186     | 626         | 9       | 5            |
| 27      | 2005 | 169     | 556         | 6       | 4            |
| 27      | 2006 | 219     | 792         | 13      | 6            |
| 27      | 2007 | 251     | 1071        | 38      | 15           |
| 27      | 2008 | 213     | 893         | 32      | 15           |
| Unknown | 2004 | 47      | 108         | 0       | 0            |
| Unknown | 2005 | 24      | 66          | 0       | 0            |
| Unknown | 2006 | 90      | 322         | 0       | 0            |
| Unknown | 2007 | 88      | 238         | 13      | 15           |
| Unknown | 2008 | 42      | 190         | 0       | 0            |

---

# Javelina (*Tayassu tajacu*)

---

## *Natural History*

The javelina, or collared peccary, is of tropical origin and only recently arrived in the Southwest. Peccary bones are not found in Arizona archaeological sites, and early settlers made infrequent references to the occurrence of javelina. Perhaps the javelina spread northward as scrub and cactus replaced Arizona's native grasslands. For whatever reason, the range of javelina is still expanding, primarily northwestward. The species occurs in the United States only in Arizona, Texas, and New Mexico, and currently occupies approximately 34 percent of Arizona with an estimated population of 38,000 post-hunt adults.

Adult javelina usually weigh between 35 and 60 pounds, the males being slightly heavier than the fe-

males. Newborn javelina only weigh about one pound. These "piglets" are tan or brown in color with a reddish dorsal stripe. They acquire the salt and pepper appearance of the adults in about three months. The whitish-banded black hairs are up to six inches long, with the hairs on the mane being the darkest and longest. In the winter, when the javelina's coat is dense and dark, a distinct, lighter-colored "collar" is visible. In summer, when the hair is shorter and lighter, this "collar" is less distinct.

Javelina continue to grow until they reach adult height in about 10 months. At this age both sexes are mature. Peccaries breed throughout the year, which, when combined with their early maturity and ability to have two litters per year, gives them the greatest repro-

ductive potential of any North American big-game mammal. The gestation period is 145 days, with most births occurring in June, July, and August. A smaller birth peak occurs in spring, corresponding with Arizona's biseasonal rainfall seasons. Unlike other animals, javelina do not lick their offspring at birth, but roll or tumble their young. The usual litter size is two, and the precocial piglets closely follow their mothers from shortly after birth until they are weaned at about six weeks of age.

Although javelina have lived as long as 24 years in captivity, the average life span in the wild is closer to seven or eight years. Coyotes and golden eagles are effective predators of juvenile javelina, and the adults are preyed upon by mountain lions, bobcats, and bears.

Javelina are opportunistic feeders, eating the flowers, fruits, nuts, and berries of a great variety of plants. Prickly pear cactus makes up the major portion of their diet, however, along with agaves, yucca roots, and other desert succulents.

Javelina are social animals with herd sizes averaging eight to nine animals. Territories are marked by droppings and by an

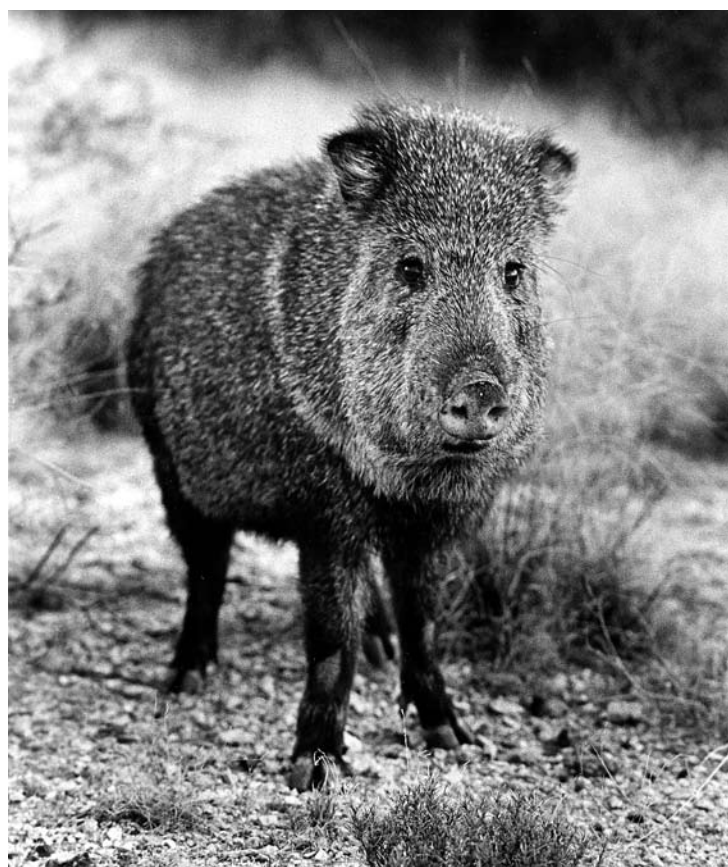

BOB WILES



oily secretion produced by the animal's scent gland positioned on its back. Any intruding javelina will be met by an aggressive display, which will evolve into a fight unless the interloper withdraws. The size of a herd's territory varies with the productivity of the habitat,

but averages about 750 acres.

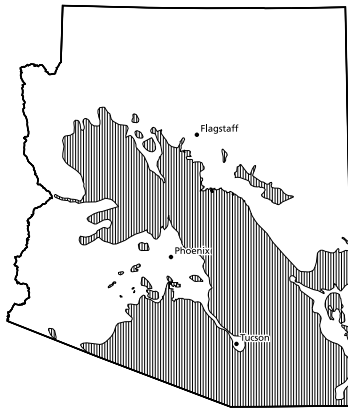

**Javelina distribution**

### *Hunt History*

Javelina were not legally designated as big game until 1929, when a season from November 1 through January 31 was authorized and a bag limit of one

javelina a year was imposed. Hunter interest gradually increased, particularly among non-residents, and the javelina became an important game animal in Arizona after World War II. By 1950, hunters were purchasing nearly 10,000 javelina tags and taking more than 1,000 animals a year. In 1959, an archery javelina season was initiated, and by 1971 more than 30,000 hunters were harvesting more than 6,000 javelina a year. This pressure was deemed excessive in some game management units, and permit-only firearm hunting was instituted in 1972. To further curtail hunt pressure and better distribute hunters, permit-only HAM (handgun, archery, and muzzleloader) hunts were initiated in 1974, and archery hunting was limited to permit-only hunting in 1992. In 1992, juniors only permits were authorized. Between 2003 and 2005, the average harvest for general firearms was 2,157, 131 for juniors-only, 873 for HAM, and 2,224 for archery.

# Javelina Survey Data

## Historic Summary of Javelina Survey Data

| Year | No. of Herds Observed <sup>1</sup> | Total Javelina Observed | Average Herd Size <sup>1</sup> | Classification |       |              | Young/100 Adults |
|------|------------------------------------|-------------------------|--------------------------------|----------------|-------|--------------|------------------|
|      |                                    |                         |                                | Adult          | Young | Unclassified |                  |
| 1955 | 0                                  | 511                     | —                              | 233            | 74    | 204          | 32               |
| 1956 | 0                                  | 324                     | —                              | 201            | 75    | 48           | 37               |
| 1957 | 0                                  | 447                     | —                              | 328            | 115   | 4            | 35               |
| 1958 | 35                                 | 346                     | 9.9                            | 258            | 88    | 0            | 34               |
| 1959 | 31                                 | 272                     | 8.8                            | 217            | 55    | 0            | 25               |
| 1960 | 87                                 | 677                     | 7.8                            | 391            | 120   | 166          | 31               |
| 1961 | 89                                 | 700                     | 7.9                            | 392            | 108   | 200          | 28               |
| 1962 | 109                                | 1003                    | 9.2                            | 667            | 267   | 69           | 40               |
| 1963 | 123                                | 1086                    | 8.8                            | 654            | 296   | 136          | 45               |
| 1964 | 114                                | 768                     | 6.7                            | 560            | 207   | 1            | 37               |
| 1965 | 160                                | 1033                    | 6.5                            | 709            | 219   | 105          | 31               |
| 1966 | 159                                | 1197                    | 7.5                            | 703            | 362   | 132          | 51               |
| 1967 | 107                                | 639                     | 6.0                            | 496            | 86    | 57           | 17               |
| 1968 | 123                                | 872                     | 7.1                            | 613            | 221   | 38           | 36               |
| 1969 | 113                                | 932                     | 8.3                            | 609            | 203   | 120          | 33               |
| 1970 | 216                                | 1757                    | 8.1                            | 1266           | 414   | 77           | 33               |
| 1971 | 220                                | 1666                    | 7.6                            | 1063           | 480   | 123          | 45               |
| 1972 | 143                                | 1158                    | 8.1                            | 679            | 255   | 224          | 38               |
| 1973 | 184                                | 1683                    | 9.2                            | 1121           | 372   | 190          | 33               |
| 1974 | 156                                | 1408                    | 9.0                            | 1035           | 306   | 67           | 30               |
| 1975 | 234                                | 1830                    | 7.8                            | 1418           | 332   | 80           | 23               |
| 1976 | 297                                | 2435                    | 8.2                            | 1745           | 609   | 81           | 35               |
| 1977 | 213                                | 1664                    | 7.8                            | 1119           | 362   | 183          | 32               |
| 1978 | 321                                | 3051                    | 9.5                            | 2249           | 667   | 135          | 30               |
| 1979 | 326                                | 3148                    | 9.7                            | 2385           | 688   | 75           | 29               |
| 1980 | 443                                | 3688                    | 8.3                            | 2865           | 762   | 61           | 27               |
| 1981 | 384                                | 3503                    | 9.1                            | 2635           | 807   | 61           | 31               |
| 1982 | 356                                | 3266                    | 9.2                            | 2390           | 780   | 96           | 33               |
| 1983 | 328                                | 3374                    | 10.3                           | 2502           | 796   | 76           | 32               |
| 1984 | 404                                | 4074                    | 10.1                           | 3085           | 946   | 43           | 31               |
| 1985 | 561                                | 5431                    | 9.7                            | 4043           | 1181  | 207          | 29               |
| 1986 | 536                                | 5051                    | 9.4                            | 3903           | 1127  | 21           | 29               |
| 1987 | 719                                | 6230                    | 8.7                            | 4923           | 1205  | 102          | 24               |
| 1988 | 656                                | 5932                    | 9.0                            | 4606           | 1323  | 3            | 29               |
| 1989 | 663                                | 5662                    | 8.5                            | 4645           | 1017  | 0            | 22               |
| 1990 | 559                                | 4887                    | 8.7                            | 3839           | 1034  | 14           | 27               |
| 1991 | 596                                | 5128                    | 8.6                            | 4008           | 1058  | 62           | 26               |
| 1992 | 571                                | 5247                    | 9.2                            | 4142           | 1060  | 45           | 26               |
| 1993 | 591                                | 5016                    | 8.5                            | 3969           | 1019  | 28           | 26               |
| 1994 | 767                                | 6739                    | 8.8                            | 5485           | 1141  | 113          | 21               |
| 1995 | 682                                | 5870                    | 8.6                            | 4763           | 1106  | 1            | 23               |
| 1996 | 674                                | 5427                    | 8.0                            | 4582           | 817   | 28           | 18               |
| 1997 | 579                                | 4684                    | 8.1                            | 3714           | 967   | 3            | 26               |
| 1998 | 538                                | 4725                    | 8.8                            | 3666           | 1057  | 2            | 29               |
| 1999 | 553                                | 4715                    | 8.5                            | 3831           | 807   | 77           | 21               |
| 2000 | 484                                | 3907                    | 8.0                            | 3174           | 725   | 8            | 23               |
| 2001 | 562                                | 4920                    | 8.7                            | 4007           | 904   | 9            | 23               |
| 2002 | 411                                | 3058                    | 7.4                            | 2565           | 490   | 3            | 19               |
| 2003 | 468                                | 3974                    | 8.4                            | 3128           | 831   | 15           | 27               |
| 2004 | 401                                | 3435                    | 8.5                            | 2775           | 656   | 4            | 24               |
| 2005 | 450                                | 3525                    | 7.8                            | 2843           | 675   | 7            | 24               |
| 2006 | 458                                | 3867                    | 8.4                            | 3074           | 712   | 81           | 23               |
| 2007 | 448                                | 3511                    | 7.8                            | 2913           | 584   | 14           | 20               |
| 2008 | 379                                | 3237                    | 8.5                            | 2500           | 726   | 11           | 29               |

<sup>1</sup>Excluding single animals

Note: The year given represents the beginning of the survey period, which runs from December through March.

Thus, surveys listed for 2007 were conducted from December 2007 through March 2008.

# Javelina Survey Data

## 5-Year: 2004-2008 Javelina Survey Data

| Unit  | Year | No. of Herds Observed <sup>1</sup> | Total Javelina Observed | Average Herd Size <sup>1</sup> | Classification |       |              | Young/100 Adults |
|-------|------|------------------------------------|-------------------------|--------------------------------|----------------|-------|--------------|------------------|
|       |      |                                    |                         |                                | Adult          | Young | Unclassified |                  |
| 1     | 2004 | 1                                  | 4                       | 4.0                            | 4              | 0     | 0            | 0                |
| 1     | 2008 | 3                                  | 20                      | 6.7                            | 13             | 4     | 3            | 31               |
| 3A/3C | 2006 | 2                                  | 5                       | 2.5                            | 5              | 0     | 0            | 0                |
| 3A/3C | 2007 | 2                                  | 4                       | 2.0                            | 4              | 0     | 0            | 0                |
| 4     | 2004 | 1                                  | 9                       | 9.0                            | 7              | 2     | 0            | 29               |
| 4     | 2005 | 1                                  | 6                       | 6.0                            | 4              | 2     | 0            | 50               |
| 4     | 2006 | 2                                  | 9                       | 4.5                            | 9              | 0     | 0            | 0                |
| 4     | 2007 | 2                                  | 10                      | 5.0                            | 8              | 2     | 0            | 25               |
| 5     | 2004 | 1                                  | 5                       | 5.0                            | 4              | 1     | 0            | 25               |
| 5     | 2005 | 1                                  | 1                       | 0.0                            | 1              | 0     | 0            | 0                |
| 5     | 2006 | 1                                  | 9                       | 9.0                            | 7              | 2     | 0            | 29               |
| 5     | 2007 | 2                                  | 10                      | 5.0                            | 9              | 1     | 0            | 11               |
| 5     | 2008 | 4                                  | 29                      | 7.3                            | 19             | 10    | 0            | 53               |
| 6A    | 2004 | 3                                  | 13                      | 4.0                            | 11             | 2     | 0            | 18               |
| 6A    | 2005 | 4                                  | 27                      | 6.8                            | 22             | 5     | 0            | 23               |
| 6A    | 2006 | 3                                  | 33                      | 11.0                           | 23             | 10    | 0            | 43               |
| 6A    | 2007 | 4                                  | 28                      | 6.8                            | 23             | 5     | 0            | 22               |
| 6A    | 2008 | 4                                  | 28                      | 6.8                            | 24             | 4     | 0            | 17               |
| 6B    | 2004 | 2                                  | 24                      | 12.0                           | 17             | 7     | 0            | 41               |
| 6B    | 2005 | 2                                  | 21                      | 10.5                           | 16             | 5     | 0            | 31               |
| 6B    | 2006 | 5                                  | 38                      | 7.6                            | 28             | 10    | 0            | 36               |
| 6B    | 2007 | 6                                  | 34                      | 5.7                            | 28             | 6     | 0            | 21               |
| 6B    | 2008 | 2                                  | 19                      | 8.5                            | 14             | 5     | 0            | 36               |
| 7     | 2004 | 2                                  | 4                       | 2.0                            | 4              | 0     | 0            | 0                |
| 7     | 2005 | 1                                  | 1                       | 0.0                            | 1              | 0     | 0            | 0                |
| 7     | 2007 | 1                                  | 2                       | 2.0                            | 2              | 0     | 0            | 0                |
| 7     | 2008 | 2                                  | 7                       | 3.5                            | 6              | 1     | 0            | 17               |
| 8     | 2005 | 1                                  | 5                       | 5.0                            | 4              | 1     | 0            | 25               |
| 8     | 2006 | 2                                  | 8                       | 4.0                            | 7              | 1     | 0            | 14               |
| 8     | 2007 | 3                                  | 19                      | 6.3                            | 13             | 6     | 0            | 46               |
| 9     | 2007 | 0                                  | 2                       | —                              | 2              | 0     | 0            | 0                |
| 10    | 2004 | 6                                  | 51                      | 8.5                            | 35             | 16    | 0            | 46               |
| 10    | 2005 | 3                                  | 44                      | 14.7                           | 28             | 16    | 0            | 57               |
| 10    | 2006 | 3                                  | 33                      | 10.7                           | 27             | 6     | 0            | 22               |
| 10    | 2007 | 6                                  | 49                      | 8.2                            | 38             | 11    | 0            | 29               |
| 10    | 2008 | 2                                  | 26                      | 12.0                           | 15             | 11    | 0            | 73               |
| 15    | 2006 | 2                                  | 27                      | 13.5                           | 26             | 1     | 0            | 4                |
| 15A   | 2008 | 1                                  | 10                      | 10.0                           | 8              | 2     | 0            | 25               |
| 16A   | 2004 | 12                                 | 89                      | 7.4                            | 65             | 24    | 0            | 37               |
| 16A   | 2005 | 5                                  | 31                      | 6.2                            | 20             | 11    | 0            | 55               |
| 16A   | 2006 | 11                                 | 82                      | 7.4                            | 68             | 14    | 0            | 21               |
| 16A   | 2007 | 10                                 | 80                      | 7.9                            | 64             | 16    | 0            | 25               |
| 16A   | 2008 | 11                                 | 76                      | 6.7                            | 63             | 13    | 0            | 21               |
| 17    | 2004 | 7                                  | 77                      | 10.9                           | 63             | 14    | 0            | 22               |
| 17A   | 2005 | 1                                  | 10                      | 10.0                           | 6              | 4     | 0            | 67               |
| 17A   | 2006 | 3                                  | 24                      | 7.7                            | 17             | 7     | 0            | 41               |
| 17A   | 2007 | 6                                  | 77                      | 12.8                           | 64             | 13    | 0            | 20               |
| 17A   | 2008 | 4                                  | 36                      | 9.0                            | 26             | 10    | 0            | 38               |
| 17B   | 2005 | 5                                  | 53                      | 10.6                           | 32             | 21    | 0            | 66               |
| 17B   | 2006 | 8                                  | 86                      | 10.8                           | 62             | 24    | 0            | 39               |
| 17B   | 2007 | 10                                 | 125                     | 12.5                           | 107            | 18    | 0            | 17               |
| 17B   | 2008 | 6                                  | 72                      | 11.8                           | 53             | 19    | 0            | 36               |
| 18A   | 2004 | 6                                  | 40                      | 6.7                            | 24             | 16    | 0            | 67               |
| 18A   | 2005 | 5                                  | 18                      | 3.6                            | 13             | 5     | 0            | 38               |
| 18A   | 2006 | 1                                  | 10                      | 10.0                           | 7              | 3     | 0            | 43               |
| 18A   | 2007 | 7                                  | 56                      | 8.0                            | 53             | 3     | 0            | 6                |
| 18A   | 2008 | 5                                  | 29                      | 5.8                            | 18             | 11    | 0            | 61               |
| 18B   | 2004 | 4                                  | 61                      | 15.0                           | 49             | 12    | 0            | 24               |
| 18B   | 2005 | 29                                 | 232                     | 8.0                            | 204            | 28    | 0            | 14               |
| 18B   | 2006 | 13                                 | 133                     | 10.2                           | 95             | 23    | 15           | 24               |
| 18B   | 2007 | 10                                 | 116                     | 11.5                           | 99             | 17    | 0            | 17               |
| 18B   | 2008 | 12                                 | 77                      | 6.3                            | 65             | 12    | 0            | 18               |
| 19A   | 2005 | 11                                 | 115                     | 10.5                           | 88             | 27    | 0            | 31               |

# Javelina Survey Data

## 5-Year: 2004-2008 Javelina Survey Data

| Unit | Year | No. of Herds Observed <sup>1</sup> | Total Javelina Observed | Average Herd Size <sup>1</sup> | Classification |       |              | Young/100 Adults |
|------|------|------------------------------------|-------------------------|--------------------------------|----------------|-------|--------------|------------------|
|      |      |                                    |                         |                                | Adult          | Young | Unclassified |                  |
| 19A  | 2006 | 5                                  | 41                      | 8.2                            | 30             | 11    | 0            | 37               |
| 19A  | 2007 | 7                                  | 96                      | 13.7                           | 54             | 32    | 10           | 59               |
| 19A  | 2008 | 5                                  | 51                      | 10.2                           | 34             | 17    | 0            | 50               |
| 19B  | 2004 | 6                                  | 26                      | 4.3                            | 20             | 6     | 0            | 30               |
| 19B  | 2005 | 11                                 | 85                      | 7.7                            | 56             | 29    | 0            | 52               |
| 19B  | 2006 | 6                                  | 90                      | 14.5                           | 27             | 17    | 46           | 63               |
| 19B  | 2007 | 4                                  | 36                      | 9.0                            | 25             | 11    | 0            | 44               |
| 19B  | 2008 | 6                                  | 50                      | 8.2                            | 36             | 14    | 0            | 39               |
| 20A  | 2005 | 8                                  | 41                      | 5.1                            | 34             | 7     | 0            | 21               |
| 20A  | 2007 | 3                                  | 17                      | 5.7                            | 10             | 7     | 0            | 70               |
| 20A  | 2008 | 4                                  | 37                      | 9.3                            | 21             | 16    | 0            | 76               |
| 20B  | 2004 | 23                                 | 202                     | 8.8                            | 169            | 33    | 0            | 20               |
| 20B  | 2005 | 17                                 | 142                     | 8.4                            | 112            | 30    | 0            | 27               |
| 20B  | 2006 | 22                                 | 189                     | 8.6                            | 152            | 37    | 0            | 24               |
| 20B  | 2007 | 18                                 | 110                     | 6.1                            | 90             | 20    | 0            | 22               |
| 20B  | 2008 | 15                                 | 133                     | 8.9                            | 119            | 14    | 0            | 12               |
| 20C  | 2004 | 24                                 | 229                     | 9.5                            | 196            | 33    | 0            | 17               |
| 20C  | 2005 | 37                                 | 368                     | 10.0                           | 304            | 64    | 0            | 21               |
| 20C  | 2006 | 25                                 | 254                     | 10.2                           | 232            | 22    | 0            | 9                |
| 20C  | 2007 | 23                                 | 243                     | 10.5                           | 203            | 40    | 0            | 20               |
| 20C  | 2008 | 35                                 | 353                     | 10.0                           | 285            | 68    | 0            | 24               |
| 21   | 2004 | 16                                 | 143                     | 8.9                            | 117            | 26    | 0            | 22               |
| 21   | 2005 | 8                                  | 48                      | 6.0                            | 38             | 10    | 0            | 26               |
| 21   | 2006 | 11                                 | 79                      | 7.2                            | 67             | 12    | 0            | 18               |
| 21   | 2007 | 10                                 | 67                      | 6.7                            | 63             | 4     | 0            | 6                |
| 21   | 2008 | 9                                  | 122                     | 13.6                           | 94             | 28    | 0            | 30               |
| 22   | 2004 | 13                                 | 99                      | 7.6                            | 82             | 17    | 0            | 21               |
| 22   | 2005 | 11                                 | 67                      | 6.1                            | 48             | 19    | 0            | 40               |
| 22   | 2006 | 17                                 | 157                     | 9.2                            | 122            | 35    | 0            | 29               |
| 22   | 2007 | 12                                 | 75                      | 6.2                            | 62             | 13    | 0            | 21               |
| 22   | 2008 | 15                                 | 108                     | 7.2                            | 91             | 17    | 0            | 19               |
| 23   | 2004 | 16                                 | 177                     | 10.9                           | 131            | 46    | 0            | 35               |
| 23   | 2005 | 32                                 | 284                     | 8.9                            | 217            | 67    | 0            | 31               |
| 23   | 2006 | 27                                 | 231                     | 8.6                            | 196            | 35    | 0            | 18               |
| 23   | 2007 | 20                                 | 161                     | 8.1                            | 132            | 29    | 0            | 22               |
| 23   | 2008 | 12                                 | 113                     | 9.4                            | 87             | 26    | 0            | 30               |
| 24A  | 2004 | 20                                 | 185                     | 9.2                            | 151            | 34    | 0            | 23               |
| 24A  | 2005 | 22                                 | 182                     | 8.3                            | 148            | 33    | 1            | 22               |
| 24A  | 2006 | 22                                 | 214                     | 9.7                            | 176            | 38    | 0            | 22               |
| 24A  | 2007 | 9                                  | 61                      | 6.8                            | 50             | 11    | 0            | 22               |
| 24A  | 2008 | 10                                 | 85                      | 8.4                            | 51             | 34    | 0            | 67               |
| 24B  | 2004 | 9                                  | 83                      | 9.2                            | 64             | 19    | 0            | 30               |
| 24B  | 2005 | 9                                  | 94                      | 10.4                           | 82             | 12    | 0            | 15               |
| 24B  | 2006 | 8                                  | 66                      | 8.3                            | 52             | 14    | 0            | 27               |
| 24B  | 2007 | 11                                 | 75                      | 6.8                            | 65             | 10    | 0            | 15               |
| 24B  | 2008 | 6                                  | 47                      | 7.8                            | 36             | 11    | 0            | 31               |
| 25M  | 2006 | 4                                  | 31                      | 7.8                            | 20             | 11    | 0            | 55               |
| 26M  | 2006 | 5                                  | 30                      | 6.0                            | 24             | 6     | 0            | 25               |
| 27   | 2004 | 9                                  | 56                      | 6.1                            | 44             | 12    | 0            | 27               |
| 27   | 2005 | 4                                  | 29                      | 7.3                            | 27             | 2     | 0            | 7                |
| 27   | 2006 | 11                                 | 117                     | 10.6                           | 92             | 25    | 0            | 27               |
| 27   | 2007 | 3                                  | 23                      | 7.7                            | 16             | 7     | 0            | 44               |
| 28   | 2004 | 19                                 | 162                     | 8.5                            | 131            | 31    | 0            | 24               |
| 28   | 2005 | 27                                 | 158                     | 5.9                            | 141            | 17    | 0            | 12               |
| 28   | 2006 | 17                                 | 132                     | 7.7                            | 121            | 11    | 0            | 9                |
| 28   | 2007 | 21                                 | 148                     | 6.9                            | 129            | 19    | 0            | 15               |
| 28   | 2008 | 13                                 | 88                      | 6.8                            | 73             | 15    | 0            | 21               |
| 29   | 2004 | 10                                 | 53                      | 5.3                            | 44             | 9     | 0            | 20               |
| 29   | 2005 | 17                                 | 100                     | 5.9                            | 92             | 8     | 0            | 9                |
| 29   | 2006 | 10                                 | 69                      | 6.9                            | 61             | 8     | 0            | 13               |
| 29   | 2007 | 9                                  | 48                      | 5.2                            | 47             | 1     | 0            | 2                |
| 29   | 2008 | 4                                  | 21                      | 5.0                            | 18             | 3     | 0            | 17               |
| 30A  | 2004 | 8                                  | 40                      | 5.0                            | 33             | 7     | 0            | 21               |

# Javelina Survey Data

## 5-Year: 2004-2008 Javelina Survey Data

| Unit | Year | No. of Herds Observed <sup>1</sup> | Total Javelina Observed | Average Herd Size <sup>1</sup> | Classification |       |              | Young/100 Adults |
|------|------|------------------------------------|-------------------------|--------------------------------|----------------|-------|--------------|------------------|
|      |      |                                    |                         |                                | Adult          | Young | Unclassified |                  |
| 30A  | 2005 | 24                                 | 154                     | 6.4                            | 132            | 22    | 0            | 17               |
| 30A  | 2006 | 14                                 | 123                     | 8.8                            | 104            | 19    | 0            | 18               |
| 30A  | 2007 | 12                                 | 130                     | 10.8                           | 112            | 18    | 0            | 16               |
| 30A  | 2008 | 11                                 | 88                      | 7.9                            | 75             | 13    | 0            | 17               |
| 30B  | 2004 | 3                                  | 18                      | 6.0                            | 12             | 6     | 0            | 50               |
| 30B  | 2005 | 4                                  | 30                      | 7.5                            | 23             | 7     | 0            | 30               |
| 30B  | 2006 | 8                                  | 67                      | 8.4                            | 51             | 16    | 0            | 31               |
| 30B  | 2007 | 9                                  | 55                      | 6.0                            | 44             | 11    | 0            | 25               |
| 30B  | 2008 | 12                                 | 86                      | 7.2                            | 59             | 27    | 0            | 46               |
| 31   | 2004 | 12                                 | 82                      | 6.8                            | 63             | 19    | 0            | 30               |
| 31   | 2005 | 8                                  | 49                      | 6.1                            | 42             | 7     | 0            | 17               |
| 31   | 2006 | 16                                 | 99                      | 6.1                            | 80             | 19    | 0            | 24               |
| 31   | 2007 | 15                                 | 101                     | 6.7                            | 90             | 11    | 0            | 12               |
| 31   | 2008 | 14                                 | 113                     | 8.1                            | 86             | 27    | 0            | 31               |
| 32   | 2004 | 11                                 | 87                      | 7.9                            | 75             | 12    | 0            | 16               |
| 32   | 2005 | 17                                 | 140                     | 8.2                            | 101            | 35    | 4            | 35               |
| 32   | 2006 | 26                                 | 196                     | 7.5                            | 159            | 37    | 0            | 23               |
| 32   | 2007 | 18                                 | 101                     | 5.6                            | 86             | 15    | 0            | 17               |
| 32   | 2008 | 12                                 | 82                      | 6.8                            | 69             | 13    | 0            | 19               |
| 33   | 2004 | 13                                 | 153                     | 11.8                           | 132            | 21    | 0            | 16               |
| 33   | 2005 | 5                                  | 58                      | 11.6                           | 44             | 14    | 0            | 32               |
| 33   | 2006 | 8                                  | 70                      | 8.8                            | 53             | 17    | 0            | 32               |
| 33   | 2007 | 10                                 | 85                      | 8.5                            | 76             | 9     | 0            | 12               |
| 33   | 2008 | 11                                 | 133                     | 12.1                           | 97             | 36    | 0            | 37               |
| 34A  | 2004 | 16                                 | 115                     | 7.1                            | 90             | 25    | 0            | 28               |
| 34A  | 2005 | 21                                 | 159                     | 7.6                            | 132            | 27    | 0            | 20               |
| 34A  | 2006 | 14                                 | 115                     | 8.1                            | 99             | 16    | 0            | 16               |
| 34A  | 2007 | 23                                 | 190                     | 8.3                            | 149            | 37    | 4            | 25               |
| 34A  | 2008 | 12                                 | 108                     | 9.0                            | 88             | 20    | 0            | 23               |
| 34B  | 2004 | 11                                 | 100                     | 9.1                            | 72             | 28    | 0            | 39               |
| 34B  | 2005 | 6                                  | 55                      | 9.2                            | 47             | 8     | 0            | 17               |
| 34B  | 2006 | 11                                 | 79                      | 7.2                            | 61             | 18    | 0            | 30               |
| 34B  | 2007 | 12                                 | 71                      | 5.8                            | 53             | 18    | 0            | 34               |
| 34B  | 2008 | 5                                  | 58                      | 11.4                           | 41             | 17    | 0            | 41               |
| 35A  | 2004 | 16                                 | 97                      | 6.0                            | 83             | 14    | 0            | 17               |
| 35A  | 2005 | 10                                 | 75                      | 7.5                            | 54             | 21    | 0            | 39               |
| 35A  | 2006 | 9                                  | 61                      | 6.8                            | 40             | 21    | 0            | 53               |
| 35A  | 2007 | 15                                 | 112                     | 7.4                            | 82             | 30    | 0            | 37               |
| 35A  | 2008 | 11                                 | 74                      | 6.7                            | 52             | 22    | 0            | 42               |
| 35B  | 2004 | 8                                  | 79                      | 9.6                            | 59             | 20    | 0            | 34               |
| 35B  | 2005 | 3                                  | 23                      | 7.7                            | 19             | 4     | 0            | 21               |
| 35B  | 2006 | 6                                  | 64                      | 10.7                           | 45             | 19    | 0            | 42               |
| 35B  | 2007 | 9                                  | 106                     | 11.8                           | 85             | 21    | 0            | 25               |
| 35B  | 2008 | 7                                  | 70                      | 10.0                           | 53             | 17    | 0            | 32               |
| 36A  | 2004 | 18                                 | 140                     | 7.8                            | 120            | 20    | 0            | 17               |
| 36A  | 2005 | 21                                 | 161                     | 7.7                            | 141            | 20    | 0            | 14               |
| 36A  | 2006 | 18                                 | 110                     | 6.1                            | 87             | 23    | 0            | 26               |
| 36A  | 2007 | 16                                 | 106                     | 6.6                            | 87             | 19    | 0            | 22               |
| 36A  | 2008 | 16                                 | 147                     | 9.2                            | 107            | 40    | 0            | 37               |
| 36B  | 2004 | 16                                 | 146                     | 9.1                            | 128            | 18    | 0            | 14               |
| 36B  | 2005 | 18                                 | 149                     | 8.3                            | 119            | 30    | 0            | 25               |
| 36B  | 2006 | 16                                 | 127                     | 7.9                            | 101            | 26    | 0            | 26               |
| 36B  | 2007 | 14                                 | 123                     | 8.6                            | 98             | 25    | 0            | 26               |
| 36B  | 2008 | 9                                  | 77                      | 8.6                            | 56             | 21    | 0            | 38               |
| 36C  | 2004 | 9                                  | 50                      | 5.4                            | 45             | 5     | 0            | 11               |
| 36C  | 2005 | 12                                 | 88                      | 7.3                            | 68             | 18    | 2            | 26               |
| 36C  | 2006 | 13                                 | 94                      | 7.2                            | 78             | 16    | 0            | 21               |
| 36C  | 2007 | 17                                 | 126                     | 7.4                            | 105            | 21    | 0            | 20               |
| 36C  | 2008 | 17                                 | 166                     | 9.8                            | 114            | 47    | 5            | 41               |
| 37A  | 2004 | 13                                 | 130                     | 9.9                            | 100            | 27    | 3            | 27               |
| 37A  | 2005 | 7                                  | 56                      | 8.0                            | 41             | 15    | 0            | 37               |
| 37A  | 2006 | 16                                 | 128                     | 8.0                            | 104            | 24    | 0            | 23               |
| 37A  | 2007 | 27                                 | 194                     | 7.2                            | 172            | 22    | 0            | 13               |

## Javelina Survey Data

### 5-Year: 2004-2008 Javelina Survey Data

| Unit | Year | No. of Herds Observed <sup>1</sup> | Total Javelina Observed | Average Herd Size <sup>1</sup> | Classification |       |              | Young/100 Adults |
|------|------|------------------------------------|-------------------------|--------------------------------|----------------|-------|--------------|------------------|
|      |      |                                    |                         |                                | Adult          | Young | Unclassified |                  |
| 37A  | 2008 | 18                                 | 127                     | 7.1                            | 109            | 18    | 0            | 17               |
| 37B  | 2004 | 21                                 | 262                     | 12.4                           | 215            | 47    | 0            | 22               |
| 37B  | 2005 | 1                                  | 9                       | 9.0                            | 9              | 0     | 0            | 0                |
| 37B  | 2006 | 23                                 | 230                     | 10.0                           | 188            | 42    | 0            | 22               |
| 37B  | 2007 | 19                                 | 131                     | 6.8                            | 118            | 13    | 0            | 11               |
| 37B  | 2008 | 21                                 | 182                     | 8.6                            | 147            | 35    | 0            | 24               |
| 39   | 2004 | 1                                  | 4                       | 4.0                            | 3              | 1     | 0            | 33               |
| 39M  | 2005 | 1                                  | 7                       | 7.0                            | 7              | 0     | 0            | 0                |
| 40   | 2004 | 1                                  | 8                       | 8.0                            | 5              | 3     | 0            | 60               |
| 40A  | 2006 | 1                                  | 3                       | 3.0                            | 3              | 0     | 0            | 0                |
| 41   | 2006 | 1                                  | 12                      | 12.0                           | 0              | 0     | 12           | —                |
| 41   | 2008 | 1                                  | 12                      | 12.0                           | 10             | 2     | 0            | 20               |
| 42   | 2004 | 7                                  | 60                      | 8.3                            | 46             | 13    | 1            | 28               |
| 42   | 2005 | 8                                  | 57                      | 7.1                            | 48             | 9     | 0            | 19               |
| 42   | 2006 | 6                                  | 50                      | 8.3                            | 33             | 9     | 8            | 27               |
| 42   | 2007 | 6                                  | 55                      | 9.2                            | 49             | 6     | 0            | 12               |
| 42   | 2008 | 7                                  | 41                      | 5.7                            | 35             | 3     | 3            | 9                |
| 44A  | 2004 | 7                                  | 72                      | 10.0                           | 62             | 10    | 0            | 16               |
| 44A  | 2005 | 12                                 | 93                      | 7.8                            | 78             | 15    | 0            | 19               |
| 44A  | 2006 | 6                                  | 42                      | 7.0                            | 35             | 7     | 0            | 20               |
| 44A  | 2007 | 7                                  | 53                      | 7.6                            | 47             | 6     | 0            | 13               |
| 44A  | 2008 | 5                                  | 36                      | 7.2                            | 33             | 3     | 0            | 9                |

### Summary of Fall General Javelina Hunts

| Year | Permits Authorized | 1st Choice Applicants | Permits Issued | Hunters | Hunter Days | Total Harvest | Percent Success |
|------|--------------------|-----------------------|----------------|---------|-------------|---------------|-----------------|
| 2006 | 920                | 4437                  | 917            | 620     | 1836        | 133           | 21              |
| 2007 | 920                | 3154                  | 920            | 649     | 2113        | 122           | 19              |

### Summary of Fall Juniors-Only Javelina Hunts

| Year | Permits Authorized | 1st Choice Applicants | Permits Issued | Hunters | Hunter Days | Total Harvest | Percent Success |
|------|--------------------|-----------------------|----------------|---------|-------------|---------------|-----------------|
| 2007 | 25                 | 18                    | 20             | 18      | 25          | 5             | 28              |
| 2008 | 2630               | 607                   | 721            | 556     | 1513        | 134           | 24              |

### Summary of Fall HAM Javelina Hunts

| Year | Permits Authorized | 1st Choice Applicants | Permits Issued | Hunters | Hunter Days | Total Harvest | Percent Success |
|------|--------------------|-----------------------|----------------|---------|-------------|---------------|-----------------|
| 2007 | 605                | 965                   | 605            | 447     | 1365        | 50            | 11              |

### Summary of Fall Archery Javelina Hunts

| Year | Permits Authorized | 1st Choice Applicants | Permits Issued | Hunters | Hunter Days | Total Harvest | Percent Success |
|------|--------------------|-----------------------|----------------|---------|-------------|---------------|-----------------|
| 2007 | 660                | 458                   | 645            | 445     | 1443        | 21            | 5               |

# Javelina Harvest Data

## Historic Summary of Spring General Javelina Hunts

| Year <sup>1</sup> | Permits Authorized | 1st Choice Applicants | Permits Issued | Hunters | Hunter Days | Total Harvest | Percent Success |
|-------------------|--------------------|-----------------------|----------------|---------|-------------|---------------|-----------------|
| 1950              | –                  | –                     | 9294           | 7788    | –           | 1344          | 17              |
| 1951              | –                  | –                     | 9995           | 8625    | –           | 1851          | 22              |
| 1952              | –                  | –                     | 12581          | 10496   | –           | 1762          | 17              |
| 1953              | –                  | –                     | 15095          | 13320   | –           | 2510          | 19              |
| 1954              | –                  | –                     | 15299          | 14829   | –           | 2661          | 18              |
| 1955              | –                  | –                     | 16832          | 14778   | –           | 3142          | 21              |
| 1956              | –                  | –                     | 17644          | 14851   | –           | 2930          | 20              |
| 1957              | –                  | –                     | 18724          | 16672   | –           | 2236          | 13              |
| 1958              | –                  | –                     | 17156          | 12344   | 23716       | 2172          | 18              |
| 1959              | –                  | –                     | 14279          | 11900   | 23434       | 2725          | 23              |
| 1960              | –                  | –                     | 16070          | 13857   | –           | 2759          | 20              |
| 1961              | –                  | –                     | 19817          | 17191   | 29735       | 3700          | 22              |
| 1962              | –                  | –                     | 22678          | 19138   | 41787       | 3845          | 20              |
| 1963              | –                  | –                     | 24940          | 21690   | 46093       | 4417          | 20              |
| 1964              | –                  | –                     | 24653          | 20985   | 46195       | 5247          | 25              |
| 1965              | –                  | –                     | 24393          | 20976   | 44818       | 4763          | 23              |
| 1966              | –                  | –                     | 25796          | 21838   | 46028       | 4849          | 22              |
| 1967              | –                  | –                     | 28386          | 23892   | 52780       | 4804          | 20              |
| 1968              | –                  | –                     | 29793          | 26551   | 62345       | 4794          | 18              |
| 1969              | –                  | –                     | 32400          | 28844   | 65775       | 5651          | 20              |
| 1970              | –                  | –                     | 33062          | 30603   | 66448       | 6278          | 21              |
| 1971              | –                  | –                     | 31208          | 27703   | 59943       | 5890          | 21              |
| 1972              | 25350              | 22855                 | 25350          | 21450   | 44178       | 3819          | 18              |
| 1973              | 24275              | 26738                 | 24275          | 20130   | 41189       | 4559          | 23              |
| 1974              | 22950              | 29708                 | 22950          | 19222   | 39258       | 5007          | 26              |
| 1975              | 22300              | 30889                 | 22300          | 19017   | 39409       | 4587          | 24              |
| 1976              | 20725              | 32657                 | 20725          | 17435   | 35956       | 4172          | 24              |
| 1977              | 20525              | 33561                 | 20525          | 17148   | 35890       | 4225          | 25              |
| 1978              | 19950              | 31685                 | 19950          | 16075   | 32666       | 3449          | 22              |
| 1979              | 18560              | 28969                 | 18560          | 15397   | 32551       | 3717          | 24              |
| 1980              | 17460              | 29690                 | 17460          | 14354   | 33299       | 3672          | 26              |
| 1981              | 15785              | 32330                 | 15785          | 12986   | 29477       | 3642          | 28              |
| 1982              | 15355              | 28007                 | 15355          | 12627   | 30540       | 3075          | 24              |
| 1983              | 15170              | 21204                 | 15170          | 13400   | 32250       | 3269          | 24              |
| 1984              | 16120              | 20052                 | 16120          | 13975   | 35149       | 3638          | 26              |
| 1985              | 15145              | 20143                 | 15145          | 13067   | 32970       | 3539          | 27              |
| 1986              | 15975              | 23247                 | 15975          | 13725   | 33473       | 3743          | 27              |
| 1987              | 15890              | 21710                 | 15890          | 13979   | 34330       | 4220          | 30              |
| 1988              | 15885              | 21737                 | 15885          | 14129   | 35067       | 4432          | 31              |
| 1989              | 15310              | 20444                 | 15310          | 13569   | 34861       | 3240          | 24              |
| 1990              | 14325              | 18859                 | 14325          | 12565   | 31314       | 3468          | 28              |
| 1991              | 13225              | 16614                 | 13900          | 12165   | 31618       | 2856          | 24              |
| 1992              | 13800              | 10394                 | 13255          | 12360   | 32183       | 3158          | 26              |
| 1993              | 13880              | 10407                 | 13787          | 11902   | 29035       | 3126          | 26              |
| 1994              | 13915              | 10867                 | 13890          | 12382   | 31672       | 3536          | 29              |
| 1995              | 13440              | 11086                 | 13433          | 11926   | 31928       | 2781          | 23              |
| 1996              | 13360              | 11151                 | 13307          | 11938   | 31600       | 3444          | 29              |
| 1997              | 12620              | 11296                 | 12622          | 11085   | 30147       | 2952          | 27              |
| 1998              | 12410              | 11835                 | 12444          | 10493   | 27482       | 2520          | 24              |
| 1999              | 12200              | 12053                 | 11937          | 10506   | 28005       | 2784          | 26              |
| 2000              | 12195              | 11603                 | 12194          | 10793   | 27700       | 3182          | 29              |
| 2001              | 12105              | 12517                 | 12110          | 10336   | 28124       | 2291          | 22              |
| 2002              | 11705              | 10941                 | 11702          | 10256   | 27685       | 2823          | 28              |
| 2003              | 11900              | 11428                 | 11920          | 10153   | 27419       | 2348          | 23              |
| 2004              | 11300              | 12879                 | 11292          | 9747    | 26424       | 2393          | 25              |
| 2005              | 11090              | 13790                 | 11207          | 8628    | 23772       | 1729          | 20              |
| 2006              | 11145              | 10972                 | 11043          | 9538    | 26024       | 2544          | 27              |
| 2007              | 11500              | 9076                  | 11170          | 9778    | 26632       | 2587          | 26              |
| 2008              | 11721              | 8106                  | 11138          | 9536    | 26185       | 2008          | 21              |

<sup>1</sup> Ft. Huachuca hunt data was gathered using the hunter questionnaire program after 1995.



## Javelina Harvest Data

### *Historic Summary of Spring Juniors-Only Javelina Hunts*

| Year | Permits Authorized | 1st Choice Applicants | Permits Issued | Hunters | Hunter Days | Total Harvest | Percent Success |
|------|--------------------|-----------------------|----------------|---------|-------------|---------------|-----------------|
| 1992 | 150                | 75                    | 120            | 103     | 225         | 20            | 19              |
| 1993 | 150                | 92                    | 140            | 125     | 283         | 31            | 25              |
| 1994 | 150                | 88                    | 148            | 138     | 289         | 49            | 36              |
| 1995 | 150                | 50                    | 89             | 78      | 198         | 16            | 21              |
| 1996 | 250                | 131                   | 197            | 191     | 396         | 65            | 34              |
| 1997 | 370                | 179                   | 256            | 229     | 570         | 84            | 37              |
| 1998 | 420                | 244                   | 324            | 300     | 738         | 74            | 25              |
| 1999 | 380                | 304                   | 338            | 297     | 631         | 111           | 37              |
| 2000 | 480                | 353                   | 444            | 397     | 824         | 159           | 40              |
| 2001 | 530                | 453                   | 509            | 443     | 986         | 110           | 25              |
| 2002 | 460                | 942                   | 460            | 385     | 812         | 149           | 39              |
| 2003 | 460                | 957                   | 460            | 401     | 915         | 124           | 31              |
| 2004 | 485                | 609                   | 485            | 430     | 1030        | 117           | 27              |
| 2005 | 535                | 611                   | 550            | 447     | 983         | 151           | 34              |
| 2006 | 670                | 682                   | 645            | 522     | 1241        | 172           | 33              |
| 2007 | 865                | 896                   | 809            | 729     | 1841        | 314           | 43              |
| 2008 | 970                | 866                   | 818            | 684     | 1614        | 273           | 40              |

### *Historic Summary of Spring HAM<sup>1</sup> Javelina Hunts*

| Year              | Permits Authorized | 1st Choice Applicants | Permits Issued | Hunters | Hunter Days | Total Harvest | Percent Success |
|-------------------|--------------------|-----------------------|----------------|---------|-------------|---------------|-----------------|
| 1974              | 100                | 302                   | 100            | 79      | 166         | 30            | 38              |
| 1975              | 100                | 246                   | 100            | 82      | 127         | 29            | 35              |
| 1976              | 900                | 1046                  | 900            | 711     | 1484        | 90            | 13              |
| 1977              | 925                | 1117                  | 925            | 689     | 1385        | 104           | 15              |
| 1978              | 1700               | 1348                  | 1700           | 1290    | 2623        | 145           | 11              |
| 1979              | 1850               | 1440                  | 1850           | 1454    | 3128        | 212           | 15              |
| 1980              | 3000               | 2108                  | 3000           | 2250    | 5178        | 367           | 16              |
| 1981              | 3750               | 2755                  | 3750           | 2986    | 7545        | 544           | 18              |
| 1982              | 3850               | 3502                  | 3850           | 3079    | 7771        | 482           | 16              |
| 1983              | 5990               | 3226                  | 5990           | 4476    | 11313       | 824           | 18              |
| 1984              | 6375               | 3517                  | 6375           | 4436    | 11775       | 878           | 20              |
| 1985              | 8180               | 4272                  | 8116           | 5653    | 14835       | 1109          | 20              |
| 1986              | 7620               | 5446                  | 7620           | 6316    | 16558       | 1180          | 19              |
| 1987              | 8200               | 5500                  | 7719           | 6382    | 16289       | 1728          | 27              |
| 1988              | 6500               | 6208                  | 6500           | 5655    | 15148       | 1133          | 20              |
| 1989              | 6075               | 6023                  | 6075           | 5287    | 14271       | 991           | 19              |
| 1990              | 6980               | 6229                  | 6980           | 5964    | 16286       | 1289          | 22              |
| 1991 <sup>2</sup> | 7340               | 6433                  | 6991           | 6159    | 16796       | 929           | 15              |
| 1992              | 6740               | 4050                  | 5786           | 5191    | 14667       | 951           | 18              |
| 1993              | 7665               | 4674                  | 6839           | 5704    | 14961       | 973           | 17              |
| 1994              | 8150               | 5081                  | 7875           | 7081    | 19553       | 1587          | 22              |
| 1995              | 8070               | 5553                  | 8004           | 7034    | 19908       | 1186          | 17              |
| 1996              | 8210               | 5888                  | 8012           | 7033    | 20053       | 1456          | 21              |
| 1997              | 8360               | 6088                  | 8155           | 7229    | 20571       | 1387          | 19              |
| 1998              | 7685               | 5888                  | 7531           | 6462    | 17451       | 1014          | 16              |
| 1999              | 7760               | 6184                  | 7176           | 6287    | 17805       | 1281          | 20              |
| 2000              | 7260               | 6321                  | 7262           | 6360    | 17621       | 1311          | 21              |
| 2001              | 6775               | 6034                  | 6738           | 5812    | 17175       | 957           | 16              |
| 2002              | 6600               | 5377                  | 6601           | 5705    | 16990       | 1148          | 20              |
| 2003              | 7050               | 5644                  | 7059           | 5992    | 18169       | 860           | 14              |
| 2004              | 6550               | 5779                  | 6550           | 5637    | 16683       | 1066          | 19              |
| 2005              | 6500               | 5342                  | 6537           | 5018    | 14657       | 692           | 14              |
| 2006              | 6400               | 4868                  | 6040           | 5226    | 15810       | 1141          | 22              |
| 2007              | 5465               | 4763                  | 5205           | 4510    | 14278       | 878           | 19              |
| 2008              | 5440               | 4366                  | 4838           | 4137    | 12768       | 692           | 17              |

<sup>1</sup> Prior to 1982, hunts were for handgun, handgun/archery, and/or archery/muzzleloader.

<sup>2</sup> Including special fall archery/shotgun hunts.

# Javelina Harvest Data

## *Historic Summary of Spring Archery Javelina Hunts*

| Year <sup>1</sup> | Permits Authorized | 1st Choice Applicants | Permits Issued | Hunters | Hunter Days | Total Harvest | Percent Success |
|-------------------|--------------------|-----------------------|----------------|---------|-------------|---------------|-----------------|
| 1963              | —                  | —                     | —              | 1125    | 3519        | 111           | 10              |
| 1964              | —                  | —                     | —              | 1226    | 3689        | 112           | 9               |
| 1965              | —                  | —                     | —              | 1438    | 3574        | 118           | 8               |
| 1966              | —                  | —                     | —              | 1441    | 3515        | 138           | 10              |
| 1967              | —                  | —                     | —              | 1283    | 3855        | 120           | 9               |
| 1968              | —                  | —                     | —              | 1608    | 5093        | 193           | 12              |
| 1969              | —                  | —                     | —              | 2295    | 7720        | 206           | 9               |
| 1970              | —                  | —                     | —              | 2455    | 8484        | 196           | 8               |
| 1971              | —                  | —                     | —              | 2918    | 9663        | 354           | 12              |
| 1972              | —                  | —                     | —              | 3795    | 12622       | 305           | 8               |
| 1973              | —                  | —                     | —              | 4286    | 13613       | 469           | 11              |
| 1974              | 100                | 10                    | —              | 3680    | 13145       | 500           | 14              |
| 1975              | 100                | 37                    | —              | 4804    | 16129       | 650           | 14              |
| 1976              | 100                | 28                    | —              | 5478    | 18970       | 1044          | 19              |
| 1977              | —                  | —                     | —              | 5472    | 20475       | 786           | 14              |
| 1978              | —                  | —                     | —              | 6725    | 23940       | 824           | 12              |
| 1979              | 2400               | 510                   | —              | 4342    | 14722       | 786           | 18              |
| 1980              | —                  | —                     | —              | 4902    | 19288       | 1222          | 25              |
| 1981              | —                  | —                     | —              | 6643    | 36568       | 1527          | 23              |
| 1982              | —                  | —                     | —              | 8735    | 39700       | 1543          | 18              |
| 1983              | —                  | —                     | 8987           | 7722    | 33638       | 1684          | 22              |
| 1984              | —                  | —                     | 9163           | —       | —           | —             | —               |
| 1985              | —                  | —                     | 9599           | 8883    | 32259       | 1946          | 22              |
| 1986              | —                  | —                     | 11088          | 10379   | 44358       | 2232          | 22              |
| 1987              | —                  | —                     | 12236          | 11200   | 50479       | 2870          | 26              |
| 1988              | —                  | —                     | 14625          | 13493   | 62771       | 3436          | 26              |
| 1989              | —                  | —                     | 14785          | 14011   | 62250       | 3605          | 26              |
| 1990              | —                  | —                     | 15104          | 14161   | 60256       | 3723          | 26              |
| 1991              | —                  | —                     | 13658          | 12504   | 54558       | 2263          | 18              |
| 1992              | 12926              | 6670                  | 9490           | 8735    | 40906       | 2330          | 27              |
| 1993              | 11990              | 7239                  | 9697           | 8657    | 38263       | 2439          | 28              |
| 1994              | 10205              | 7424                  | 9944           | 9099    | 43001       | 2564          | 28              |
| 1995              | 10555              | 7639                  | 10357          | 9430    | 45061       | 2764          | 29              |
| 1996              | 10125              | 7583                  | 9908           | 8978    | 42000       | 2661          | 30              |
| 1997              | 9755               | 7809                  | 9703           | 8725    | 40922       | 2672          | 31              |
| 1998              | 9450               | 8270                  | 9444           | 8443    | 42692       | 2163          | 26              |
| 1999              | 9220               | 8972                  | 9214           | 8242    | 41443       | 2187          | 27              |
| 2000              | 9650               | 8828                  | 9646           | 8604    | 41072       | 2574          | 30              |
| 2001              | 9685               | 9736                  | 9683           | 8438    | 41754       | 1862          | 22              |
| 2002              | 9685               | 9013                  | 9673           | 8662    | 41735       | 2790          | 32              |
| 2003              | 9635               | 9756                  | 9661           | 8545    | 43478       | 2236          | 26              |
| 2004              | 9435               | 10355                 | 9434           | 8324    | 40575       | 2398          | 29              |
| 2005              | 9685               | 10351                 | 9771           | 8506    | 42364       | 2038          | 24              |
| 2006              | 10000              | 9861                  | 9930           | 8703    | 43174       | 2452          | 28              |
| 2007              | 9220               | 8311                  | 8842           | 7675    | 34571       | 2305          | 30              |
| 2008              | 9661               | 8065                  | 8939           | 7757    | 35110       | 2229          | 29              |

<sup>1</sup> Ft. Huachuca hunt data was gathered using the hunter questionnaire program after 1995.

# Javelina Hunt Data

## 5-Year: 2004-2008 Harvest

| Unit                  | Year | Dates Authorized | Permits Authorized | 1st Choice Applicants | Permits Issued | Draw Odds | Hunters | Hunter Days | Harvest | Hunt Success |
|-----------------------|------|------------------|--------------------|-----------------------|----------------|-----------|---------|-------------|---------|--------------|
| <b>SPRING GENERAL</b> |      |                  |                    |                       |                |           |         |             |         |              |
| 6A                    | 2004 | 2/13-2/19        | 200                | 368                   | 200            | 53.0      | 158     | 408         | 53      | 34           |
| 6A                    | 2005 | 2/11-2/17        | 200                | 386                   | 205            | 49.2      | 122     | 296         | 6       | 5            |
| 6A                    | 2006 | 2/17-2/23        | 200                | 319                   | 200            | 62.1      | 183     | 458         | 62      | 34           |
| 6A/6B/8               | 2007 | 2/23-3/01        | 150                | 258                   | 150            | 54.3      | 112     | 275         | 42      | 38           |
| 6A/6B/8               | 2008 | 2/22-2/28        | 150                | 250                   | 150            | 58.0      | 117     | 305         | 40      | 34           |
| 10/18A                | 2004 | 2/20-2/26        | 200                | 174                   | 200            | 87.4      | 181     | 469         | 42      | 23           |
| 10/18A                | 2005 | 2/18-2/24        | 200                | 247                   | 201            | 71.7      | 145     | 390         | 18      | 12           |
| 10/18A                | 2006 | 2/24-3/02        | 200                | 169                   | 200            | 100.0     | 168     | 501         | 55      | 33           |
| 10/18A                | 2007 | 2/23-3/01        | 250                | 188                   | 250            | 96.8      | 220     | 697         | 73      | 33           |
| 10/18A                | 2008 | 2/22-2/28        | 250                | 184                   | 250            | 87.0      | 212     | 622         | 46      | 22           |
| 16A                   | 2004 | 2/20-2/26        | 40                 | 81                    | 40             | 49.4      | 34      | 113         | 3       | 9            |
| 16A                   | 2005 | 2/18-2/24        | 55                 | 98                    | 57             | 56.1      | 41      | 114         | 10      | 24           |
| 16A                   | 2006 | 2/24-3/02        | 110                | 105                   | 110            | 96.2      | 102     | 297         | 44      | 43           |
| 16A                   | 2007 | 2/23-3/01        | 200                | 127                   | 200            | 96.9      | 177     | 547         | 64      | 36           |
| 16A                   | 2008 | 2/22-2/28        | 350                | 148                   | 350            | 97.3      | 301     | 935         | 43      | 14           |
| 17                    | 2004 | 2/13-2/19        | 400                | 547                   | 400            | 69.3      | 339     | 976         | 109     | 32           |
| 17                    | 2005 | 2/11-2/17        | 400                | 472                   | 404            | 75.6      | 302     | 843         | 37      | 12           |
| 17                    | 2006 | 2/17-2/23        | 400                | 455                   | 400            | 82.0      | 355     | 1034        | 105     | 30           |
| 17                    | 2007 | 2/23-3/01        | 400                | 305                   | 400            | 98.7      | 359     | 1047        | 108     | 30           |
| 17                    | 2008 | 2/22-2/28        | 450                | 289                   | 446            | 97.9      | 385     | 1072        | 69      | 18           |
| 18B                   | 2004 | 2/20-2/26        | 300                | 498                   | 300            | 58.4      | 260     | 659         | 88      | 34           |
| 18B                   | 2005 | 2/18-2/24        | 300                | 465                   | 306            | 61.7      | 218     | 610         | 71      | 33           |
| 18B                   | 2006 | 2/24-3/02        | 300                | 383                   | 300            | 76.8      | 259     | 688         | 120     | 46           |
| 18B                   | 2007 | 2/23-3/01        | 450                | 380                   | 450            | 89.7      | 401     | 1066        | 189     | 47           |
| 18B                   | 2008 | 2/22-2/28        | 500                | 361                   | 500            | 87.8      | 412     | 1142        | 92      | 22           |
| 19A                   | 2004 | 2/13-2/19        | 200                | 224                   | 200            | 73.7      | 178     | 483         | 44      | 25           |
| 19A                   | 2005 | 2/11-2/17        | 200                | 284                   | 205            | 61.6      | 156     | 395         | 30      | 19           |
| 19A                   | 2006 | 2/17-2/23        | 250                | 244                   | 250            | 86.9      | 225     | 661         | 58      | 26           |
| 19A                   | 2007 | 2/23-3/01        | 300                | 163                   | 300            | 96.9      | 270     | 795         | 85      | 31           |
| 19A                   | 2008 | 2/22-2/28        | 300                | 220                   | 300            | 91.8      | 249     | 722         | 49      | 20           |
| 19B                   | 2004 | 2/13-2/19        | 200                | 139                   | 200            | 100.0     | 170     | 480         | 42      | 25           |
| 19B                   | 2005 | 2/11-2/17        | 250                | 124                   | 252            | 100.0     | 158     | 408         | 9       | 6            |
| 19B                   | 2006 | 2/17-2/23        | 250                | 92                    | 250            | 100.0     | 211     | 616         | 34      | 16           |
| 19B                   | 2007 | 2/23-3/01        | 300                | 58                    | 300            | 100.0     | 270     | 737         | 37      | 14           |
| 19B                   | 2008 | 2/22-2/28        | 300                | 65                    | 288            | 100.0     | 226     | 558         | 15      | 7            |
| 20A                   | 2004 | 2/13-2/19        | 300                | 371                   | 300            | 67.7      | 233     | 587         | 85      | 36           |
| 20A                   | 2005 | 2/11-2/17        | 300                | 423                   | 304            | 59.8      | 218     | 535         | 40      | 18           |
| 20A                   | 2006 | 2/17-2/23        | 350                | 411                   | 350            | 79.6      | 297     | 792         | 104     | 35           |
| 20A                   | 2007 | 2/23-3/01        | 325                | 306                   | 325            | 95.8      | 277     | 698         | 85      | 31           |
| 20A                   | 2008 | 2/22-2/28        | 350                | 217                   | 350            | 99.1      | 323     | 948         | 79      | 24           |
| 20B                   | 2004 | 2/20-2/26        | 450                | 746                   | 450            | 53.6      | 401     | 1046        | 129     | 32           |
| 20B                   | 2005 | 2/18-2/24        | 550                | 1013                  | 562            | 51.9      | 442     | 1137        | 96      | 22           |
| 20B                   | 2006 | 2/24-3/02        | 550                | 767                   | 550            | 66.4      | 485     | 1370        | 127     | 26           |
| 20B                   | 2007 | 2/23-3/01        | 625                | 657                   | 625            | 88.7      | 573     | 1430        | 157     | 27           |
| 20B                   | 2008 | 2/22-2/28        | 625                | 539                   | 625            | 98.0      | 535     | 1473        | 94      | 18           |
| 20C                   | 2007 | 2/23-3/01        | 250                | 216                   | 250            | 90.3      | 225     | 587         | 83      | 37           |
| 20C                   | 2008 | 2/22-2/28        | 250                | 200                   | 250            | 95.5      | 225     | 648         | 59      | 26           |
| 21                    | 2004 | 2/20-2/26        | 700                | 1461                  | 700            | 47.2      | 611     | 1467        | 116     | 19           |
| 21                    | 2005 | 2/18-2/24        | 650                | 1525                  | 652            | 42.0      | 443     | 1170        | 79      | 18           |
| 21                    | 2006 | 2/24-3/02        | 600                | 935                   | 600            | 61.1      | 548     | 1418        | 120     | 22           |
| 21                    | 2007 | 2/23-3/01        | 550                | 697                   | 550            | 74.8      | 473     | 1247        | 115     | 24           |
| 21                    | 2008 | 2/22-2/28        | 500                | 672                   | 500            | 72.0      | 437     | 1160        | 87      | 20           |
| 22                    | 2004 | 2/20-2/26        | 775                | 1397                  | 775            | 50.4      | 665     | 1728        | 70      | 11           |
| 22                    | 2005 | 2/18-2/24        | 625                | 1244                  | 630            | 46.7      | 425     | 1101        | 51      | 12           |
| 22                    | 2006 | 2/24-3/02        | 625                | 922                   | 625            | 59.8      | 541     | 1446        | 92      | 17           |
| 22                    | 2007 | 2/23-3/01        | 700                | 870                   | 700            | 72.4      | 597     | 1633        | 86      | 14           |
| 22                    | 2008 | 2/22-2/28        | 675                | 627                   | 675            | 85.3      | 534     | 1480        | 89      | 17           |
| 23                    | 2004 | 2/20-2/26        | 225                | 575                   | 225            | 39.1      | 193     | 495         | 41      | 21           |
| 23                    | 2005 | 2/18-2/24        | 225                | 703                   | 232            | 32.0      | 136     | 324         | 23      | 17           |
| 23                    | 2006 | 2/24-3/02        | 225                | 708                   | 225            | 31.5      | 185     | 450         | 62      | 34           |
| 23                    | 2007 | 2/23-3/01        | 350                | 508                   | 350            | 63.4      | 299     | 771         | 106     | 35           |
| 23                    | 2008 | 2/22-2/28        | 300                | 480                   | 300            | 59.0      | 238     | 680         | 54      | 23           |

FTHU = Fort Huachuca

# Javelina Hunt Data

## 5-Year: 2004-2008 Harvest

| Unit                       | Year | Dates Authorized | Permits Authorized | 1st Choice Applicants | Permits Issued | Draw Odds | Hunters | Hunter Days | Harvest | Hunt Success |
|----------------------------|------|------------------|--------------------|-----------------------|----------------|-----------|---------|-------------|---------|--------------|
| SPRING GENERAL (continued) |      |                  |                    |                       |                |           |         |             |         |              |
| 24A                        | 2004 | 2/20-2/26        | 215                | 342                   | 215            | 60.5      | 183     | 478         | 43      | 24           |
| 24A                        | 2005 | 2/18-2/24        | 215                | 431                   | 215            | 47.1      | 188     | 543         | 55      | 29           |
| 24A                        | 2006 | 2/24-3/02        | 215                | 286                   | 215            | 67.1      | 185     | 470         | 56      | 30           |
| 24A                        | 2007 | 2/23-3/01        | 275                | 207                   | 275            | 100.0     | 261     | 724         | 60      | 23           |
| 24A                        | 2008 | 2/22-2/28        | 250                | 190                   | 250            | 98.4      | 211     | 607         | 49      | 23           |
| 24B                        | 2004 | 2/20-2/26        | 350                | 516                   | 350            | 60.7      | 300     | 779         | 45      | 15           |
| 24B                        | 2005 | 2/18-2/24        | 250                | 384                   | 250            | 53.1      | 190     | 556         | 23      | 12           |
| 24B                        | 2006 | 2/24-3/02        | 250                | 345                   | 250            | 63.5      | 224     | 551         | 54      | 24           |
| 24B                        | 2007 | 2/23-3/01        | 350                | 276                   | 350            | 98.2      | 306     | 736         | 105     | 34           |
| 24B                        | 2008 | 2/22-2/28        | 325                | 284                   | 325            | 99.3      | 286     | 755         | 53      | 19           |
| 27                         | 2004 | 2/13-2/19        | 250                | 116                   | 250            | 100.0     | 216     | 583         | 56      | 26           |
| 27                         | 2005 | 2/11-2/17        | 250                | 127                   | 250            | 100.0     | 151     | 404         | 30      | 20           |
| 27                         | 2006 | 2/17-2/23        | 250                | 85                    | 250            | 100.0     | 186     | 546         | 54      | 29           |
| 27                         | 2007 | 2/23-3/01        | 125                | 72                    | 125            | 97.2      | 99      | 280         | 28      | 28           |
| 27                         | 2008 | 2/22-2/28        | 125                | 72                    | 114            | 95.8      | 91      | 228         | 31      | 34           |
| 28                         | 2004 | 2/20-2/26        | 350                | 248                   | 350            | 100.0     | 285     | 781         | 97      | 34           |
| 28                         | 2005 | 2/18-2/24        | 350                | 279                   | 357            | 100.0     | 285     | 786         | 117     | 41           |
| 28                         | 2006 | 2/24-3/02        | 350                | 263                   | 350            | 100.0     | 293     | 719         | 147     | 50           |
| 28                         | 2007 | 2/23-3/01        | 250                | 182                   | 250            | 96.7      | 225     | 626         | 86      | 38           |
| 28                         | 2008 | 2/22-2/28        | 250                | 161                   | 250            | 94.4      | 229     | 615         | 102     | 45           |
| 29                         | 2004 | 2/20-2/26        | 250                | 35                    | 250            | 100.0     | 208     | 550         | 42      | 20           |
| 29                         | 2005 | 2/18-2/24        | 250                | 60                    | 251            | 100.0     | 202     | 586         | 25      | 12           |
| 29                         | 2006 | 2/24-3/02        | 250                | 43                    | 153            | 100.0     | 119     | 340         | 26      | 22           |
| 29                         | 2007 | 2/23-3/01        | 200                | 29                    | 92             | 100.0     | 87      | 233         | 29      | 33           |
| 29                         | 2008 | 2/22-2/28        | 200                | 19                    | 78             | 100.0     | 76      | 165         | 30      | 39           |
| 30A                        | 2004 | 2/20-2/26        | 350                | 221                   | 349            | 100.0     | 297     | 762         | 82      | 28           |
| 30A                        | 2005 | 2/18-2/24        | 350                | 312                   | 352            | 100.0     | 302     | 866         | 85      | 28           |
| 30A                        | 2006 | 2/24-3/02        | 350                | 170                   | 347            | 100.0     | 287     | 792         | 103     | 36           |
| 30A                        | 2007 | 2/23-3/01        | 300                | 145                   | 274            | 96.6      | 228     | 659         | 71      | 31           |
| 30A                        | 2008 | 2/22-2/28        | 300                | 146                   | 250            | 94.5      | 217     | 522         | 85      | 39           |
| 30B                        | 2004 | 2/20-2/26        | 200                | 106                   | 200            | 100.0     | 175     | 543         | 42      | 24           |
| 30B                        | 2005 | 2/18-2/24        | 200                | 80                    | 201            | 100.0     | 163     | 504         | 9       | 6            |
| 30B                        | 2006 | 2/24-3/02        | 150                | 69                    | 150            | 100.0     | 135     | 398         | 34      | 25           |
| 30B                        | 2007 | 2/23-3/01        | 125                | 57                    | 125            | 100.0     | 84      | 240         | 19      | 23           |
| 30B                        | 2008 | 2/22-2/28        | 125                | 41                    | 106            | 100.0     | 104     | 303         | 20      | 19           |
| 31                         | 2004 | 2/20-2/26        | 150                | 189                   | 147            | 77.8      | 113     | 369         | 30      | 27           |
| 31                         | 2005 | 2/18-2/24        | 150                | 169                   | 151            | 82.3      | 118     | 371         | 33      | 28           |
| 31                         | 2006 | 2/24-3/02        | 200                | 142                   | 200            | 100.0     | 163     | 468         | 57      | 35           |
| 31                         | 2007 | 2/23-3/01        | 175                | 97                    | 175            | 97.9      | 146     | 414         | 18      | 12           |
| 31                         | 2008 | 2/22-2/28        | 175                | 77                    | 170            | 100.0     | 113     | 288         | 23      | 20           |
| 32                         | 2004 | 2/20-2/26        | 500                | 545                   | 500            | 85.7      | 425     | 1108        | 110     | 26           |
| 32                         | 2005 | 2/18-2/24        | 450                | 520                   | 454            | 80.6      | 369     | 1005        | 75      | 20           |
| 32                         | 2006 | 2/24-3/02        | 500                | 479                   | 500            | 99.4      | 402     | 1061        | 122     | 30           |
| 32                         | 2007 | 2/23-3/01        | 450                | 316                   | 450            | 97.5      | 392     | 1086        | 95      | 24           |
| 32                         | 2008 | 2/22-2/28        | 475                | 290                   | 475            | 97.6      | 405     | 1083        | 92      | 23           |
| 33                         | 2004 | 2/20-2/26        | 700                | 563                   | 697            | 100.0     | 605     | 1573        | 183     | 30           |
| 33                         | 2005 | 2/18-2/24        | 700                | 644                   | 710            | 95.3      | 583     | 1620        | 129     | 22           |
| 33                         | 2006 | 2/24-3/02        | 700                | 619                   | 700            | 100.0     | 601     | 1555        | 146     | 24           |
| 33                         | 2007 | 2/23-3/01        | 600                | 521                   | 600            | 93.5      | 508     | 1294        | 142     | 28           |
| 33                         | 2008 | 2/22-2/28        | 600                | 458                   | 600            | 95.0      | 511     | 1270        | 153     | 30           |
| 34A                        | 2004 | 2/20-2/26        | 400                | 261                   | 400            | 100.0     | 357     | 1028        | 92      | 26           |
| 34A                        | 2005 | 2/18-2/24        | 400                | 339                   | 401            | 100.0     | 336     | 945         | 90      | 27           |
| 34A                        | 2006 | 2/24-3/02        | 400                | 271                   | 400            | 100.0     | 341     | 951         | 91      | 27           |
| 34A                        | 2007 | 2/23-3/01        | 625                | 188                   | 509            | 100.0     | 446     | 1214        | 135     | 30           |
| 34A                        | 2008 | 2/22-2/28        | 625                | 191                   | 495            | 100.0     | 416     | 1150        | 84      | 20           |
| 34B                        | 2004 | 2/20-2/26        | 100                | 68                    | 100            | 100.0     | 87      | 266         | 17      | 20           |
| 34B                        | 2005 | 2/18-2/24        | 100                | 79                    | 101            | 100.0     | 88      | 292         | 15      | 17           |
| 34B                        | 2006 | 2/24-3/02        | 100                | 62                    | 100            | 100.0     | 78      | 198         | 22      | 28           |
| 34B                        | 2007 | 2/23-3/01        | 100                | 47                    | 100            | 100.0     | 83      | 231         | 12      | 14           |
| 34B                        | 2008 | 2/22-2/28        | 100                | 32                    | 77             | 96.9      | 66      | 165         | 9       | 14           |
| 35A                        | 2004 | 2/20-2/26        | 100                | 69                    | 100            | 100.0     | 80      | 205         | 25      | 31           |
| 35A                        | 2005 | 2/18-2/24        | 100                | 74                    | 100            | 100.0     | 86      | 293         | 14      | 16           |

FTHU = Fort Huachuca

# Javelina Hunt Data

## 5-Year: 2004-2008 Harvest

| Unit                              | Year | Dates Authorized | Permits Authorized | 1st Choice Applicants | Permits Issued | Draw Odds | Hunters | Hunter Days | Harvest | Hunt Success |
|-----------------------------------|------|------------------|--------------------|-----------------------|----------------|-----------|---------|-------------|---------|--------------|
| <b>SPRING GENERAL (continued)</b> |      |                  |                    |                       |                |           |         |             |         |              |
| 35A                               | 2006 | 2/24-3/02        | 100                | 46                    | 100            | 100.0     | 88      | 240         | 25      | 28           |
| 35A                               | 2007 | 2/23-3/01        | 75                 | 48                    | 75             | 100.0     | 63      | 172         | 10      | 16           |
| 35A                               | 2008 | 2/22-2/28        | 75                 | 37                    | 56             | 86.5      | 44      | 147         | 0       | 0            |
| 35B                               | 2004 | 2/20-2/26        | 100                | 60                    | 100            | 100.0     | 80      | 213         | 30      | 38           |
| 35B                               | 2005 | 2/18-2/24        | 100                | 94                    | 101            | 93.6      | 54      | 155         | 12      | 22           |
| 35B                               | 2006 | 2/24-3/02        | 100                | 54                    | 100            | 100.0     | 85      | 230         | 18      | 21           |
| 35B                               | 2007 | 2/23-3/01        | 75                 | 41                    | 75             | 100.0     | 64      | 182         | 15      | 23           |
| 35B                               | 2008 | 2/22-2/28        | 75                 | 28                    | 66             | 96.4      | 51      | 137         | 7       | 14           |
| 36A                               | 2004 | 2/20-2/26        | 700                | 598                   | 700            | 100.0     | 617     | 1763        | 162     | 26           |
| 36A                               | 2005 | 2/18-2/24        | 700                | 584                   | 711            | 100.0     | 600     | 1654        | 108     | 18           |
| 36A                               | 2006 | 2/24-3/02        | 650                | 409                   | 650            | 100.0     | 578     | 1635        | 129     | 22           |
| 36A                               | 2007 | 2/23-3/01        | 375                | 269                   | 375            | 94.1      | 330     | 968         | 66      | 20           |
| 36A                               | 2008 | 2/22-2/28        | 375                | 233                   | 375            | 94.0      | 327     | 907         | 87      | 27           |
| 36B                               | 2004 | 2/20-2/26        | 400                | 369                   | 400            | 99.7      | 360     | 977         | 97      | 27           |
| 36B                               | 2005 | 2/18-2/24        | 400                | 388                   | 403            | 94.6      | 335     | 1004        | 59      | 18           |
| 36B                               | 2006 | 2/24-3/02        | 400                | 245                   | 400            | 100.0     | 342     | 960         | 84      | 25           |
| 36B                               | 2007 | 2/23-3/01        | 475                | 240                   | 437            | 100.0     | 384     | 1049        | 83      | 22           |
| 36B                               | 2008 | 2/22-2/28        | 475                | 181                   | 347            | 95.0      | 313     | 871         | 69      | 22           |
| 36C                               | 2004 | 2/20-2/26        | 475                | 299                   | 475            | 100.0     | 418     | 1220        | 81      | 19           |
| 36C                               | 2005 | 2/18-2/24        | 450                | 296                   | 455            | 100.0     | 356     | 1009        | 63      | 18           |
| 36C                               | 2006 | 2/24-3/02        | 350                | 179                   | 350            | 100.0     | 306     | 921         | 88      | 29           |
| 36C                               | 2007 | 2/23-3/01        | 275                | 137                   | 237            | 100.0     | 223     | 606         | 49      | 22           |
| 36C                               | 2008 | 2/22-2/28        | 275                | 112                   | 228            | 100.0     | 206     | 652         | 34      | 17           |
| 37A                               | 2004 | 2/20-2/26        | 800                | 629                   | 800            | 100.0     | 707     | 2078        | 176     | 25           |
| 37A                               | 2005 | 2/18-2/24        | 800                | 752                   | 802            | 92.8      | 653     | 1800        | 149     | 23           |
| 37A                               | 2006 | 2/24-3/02        | 800                | 649                   | 800            | 100.0     | 725     | 2070        | 144     | 20           |
| 37A                               | 2007 | 2/23-3/01        | 780                | 512                   | 780            | 99.6      | 700     | 1936        | 143     | 20           |
| 37A                               | 2008 | 2/22-2/28        | 780                | 415                   | 780            | 96.6      | 702     | 1929        | 88      | 13           |
| 37B                               | 2004 | 2/20-2/26        | 900                | 1049                  | 901            | 77.9      | 794     | 2186        | 151     | 19           |
| 37B                               | 2005 | 2/18-2/24        | 900                | 1179                  | 914            | 71.3      | 745     | 2000        | 158     | 21           |
| 37B                               | 2006 | 2/24-3/02        | 950                | 1025                  | 950            | 88.6      | 823     | 2130        | 154     | 19           |
| 37B                               | 2007 | 2/23-3/01        | 1000               | 932                   | 1000           | 94.1      | 883     | 2424        | 187     | 21           |
| 37B                               | 2008 | 2/22-2/28        | 1000               | 804                   | 996            | 94.3      | 876     | 2368        | 159     | 18           |
| 42/44A                            | 2008 | 2/22-2/28        | 100                | 60                    | 100            | 93.3      | 82      | 239         | 8       | 10           |
| FTHU                              | 2004 | 2/13-2/19        | 20                 | 15                    | 18             | 100.0     | 17      | 51          | 10      | 59           |
| FTHU                              | 2005 | 2/11-2/17        | 20                 | 15                    | 18             | 100.0     | 18      | 56          | 10      | 56           |
| FTHU                              | 2006 | 2/17-2/23        | 20                 | 21                    | 18             | 85.7      | 18      | 58          | 7       | 39           |
| FTHU                              | 2007 | 2/16-2/22        | 20                 | 27                    | 16             | 59.3      | 13      | 28          | 4       | 31           |
| FTHU                              | 2008 | 2/15-2/21        | 16                 | 23                    | 16             | 65.2      | 16      | 39          | 9       | 56           |
| <b>SPRING JUNIOR ONLY</b>         |      |                  |                    |                       |                |           |         |             |         |              |
| 6A/6B/8                           | 2007 | 1/26-2/04        | 75                 | 42                    | 75             | 100.0     | 71      | 174         | 21      | 30           |
| 6A/6B/8                           | 2008 | 1/25-2/03        | 75                 | 54                    | 75             | 96.3      | 63      | 150         | 21      | 33           |
| 10/17/18A/19/20A                  | 2004 | 2/06-2/12        | 100                | 181                   | 100            | 55.3      | 90      | 194         | 29      | 32           |
| 10/17/18A/19/20A                  | 2005 | 2/04-2/10        | 100                | 156                   | 105            | 63.5      | 87      | 169         | 33      | 38           |
| 10/17/18A/19/20A                  | 2006 | 2/10-2/16        | 100                | 148                   | 100            | 66.9      | 79      | 197         | 13      | 16           |
| 10/17/18A/19/20A                  | 2007 | 1/26-2/04        | 100                | 96                    | 100            | 85.4      | 89      | 223         | 35      | 39           |
| 10/17/18A/19/20A                  | 2008 | 1/25-2/03        | 100                | 81                    | 100            | 91.4      | 83      | 187         | 30      | 36           |
| 16A                               | 2004 | 2/06-2/12        | 10                 | 6                     | 10             | 83.3      | 10      | 30          | 3       | 30           |
| 16A                               | 2005 | 2/04-2/10        | 10                 | 16                    | 10             | 62.5      | 8       | 13          | 5       | 63           |
| 16A                               | 2006 | 2/10-2/16        | 20                 | 8                     | 20             | 100.0     | 18      | 47          | 11      | 61           |
| 16A                               | 2007 | 1/26-2/04        | 30                 | 13                    | 25             | 92.3      | 22      | 42          | 11      | 50           |
| 16A                               | 2008 | 1/25-2/03        | 50                 | 21                    | 26             | 95.2      | 21      | 52          | 12      | 57           |
| 18B                               | 2007 | 1/26-2/04        | 30                 | 17                    | 30             | 100.0     | 28      | 63          | 17      | 61           |
| 18B                               | 2008 | 1/25-2/03        | 100                | 31                    | 47             | 90.3      | 39      | 79          | 19      | 49           |
| 20B                               | 2005 | 2/04-2/10        | 175                | 168                   | 180            | 92.3      | 154     | 332         | 46      | 30           |
| 20B/21                            | 2007 | 1/26-2/04        | 55                 | 111                   | 55             | 48.7      | 52      | 126         | 16      | 31           |
| 20B/21                            | 2008 | 1/25-2/03        | 65                 | 134                   | 65             | 47.0      | 46      | 106         | 13      | 28           |
| 20C                               | 2004 | 2/06-2/12        | 75                 | 132                   | 75             | 52.3      | 71      | 164         | 30      | 42           |
| 20C                               | 2005 | 2/04-2/10        | 100                | 119                   | 101            | 81.5      | 87      | 176         | 49      | 56           |
| 20C                               | 2006 | 2/10-2/16        | 100                | 147                   | 100            | 66.0      | 83      | 217         | 33      | 40           |
| 20C                               | 2007 | 1/26-2/04        | 100                | 110                   | 100            | 80.9      | 90      | 210         | 52      | 58           |
| 20C                               | 2008 | 1/25-2/03        | 100                | 87                    | 99             | 88.5      | 86      | 188         | 40      | 47           |

FTHU = Fort Huachuca

# Javelina Hunt Data

## 5-Year: 2004-2008 Harvest

| Unit                                  | Year | Dates Authorized | Permits Authorized | 1st Choice Applicants | Permits Issued | Draw Odds | Hunters | Hunter Days | Harvest | Hunt Success |
|---------------------------------------|------|------------------|--------------------|-----------------------|----------------|-----------|---------|-------------|---------|--------------|
| <b>SPRING JUNIOR ONLY (continued)</b> |      |                  |                    |                       |                |           |         |             |         |              |
| 22/23                                 | 2007 | 1/26-2/04        | 50                 | 146                   | 50             | 34.3      | 43      | 119         | 21      | 49           |
| 22/23                                 | 2008 | 1/25-2/03        | 50                 | 130                   | 50             | 38.5      | 40      | 83          | 13      | 33           |
| 23                                    | 2006 | 2/10-2/16        | 200                | 188                   | 200            | 85.1      | 169     | 377         | 48      | 28           |
| 24A/24B                               | 2007 | 1/26-2/04        | 50                 | 58                    | 50             | 58.6      | 50      | 142         | 26      | 52           |
| 24A/24B                               | 2008 | 1/25-2/03        | 45                 | 58                    | 45             | 56.9      | 36      | 76          | 17      | 47           |
| 24B                                   | 2004 | 2/06-2/12        | 150                | 123                   | 150            | 89.4      | 126     | 316         | 29      | 23           |
| 27                                    | 2007 | 1/26-2/04        | 50                 | 6                     | 11             | 16.7      | 11      | 40          | 0       | 0            |
| 27                                    | 2008 | 1/25-2/03        | 50                 | 6                     | 13             | 83.3      | 13      | 36          | 5       | 38           |
| 28/28/30/31/32                        | 2007 | 1/26-2/04        | 65                 | 75                    | 65             | 72.0      | 63      | 173         | 40      | 63           |
| 28/28/30/31/32                        | 2008 | 1/25-2/03        | 75                 | 75                    | 75             | 78.7      | 60      | 134         | 35      | 58           |
| 33/37                                 | 2007 | 1/26-2/04        | 150                | 166                   | 150            | 80.1      | 124     | 279         | 45      | 36           |
| 33/37                                 | 2008 | 1/25-2/03        | 150                | 140                   | 150            | 90.7      | 128     | 347         | 38      | 30           |
| 33/37B                                | 2006 | 2/10-2/16        | 150                | 140                   | 150            | 85.7      | 115     | 279         | 47      | 41           |
| 34A/34B                               | 2007 | 1/26-2/04        | 40                 | 21                    | 39             | 90.5      | 37      | 100         | 10      | 27           |
| 34A/34B                               | 2008 | 1/25-2/03        | 40                 | 14                    | 20             | 71.4      | 18      | 51          | 7       | 39           |
| 35A/35B                               | 2007 | 1/26-2/04        | 20                 | 2                     | 9              | 100.0     | 4       | 11          | 0       | 0            |
| 35A/35B                               | 2008 | 1/25-2/03        | 20                 | 3                     | 5              | 100.0     | 5       | 11          | 1       | 20           |
| 36A/36C                               | 2005 | 2/04-2/10        | 100                | 82                    | 104            | 100.0     | 77      | 193         | 15      | 19           |
| 36A/36B                               | 2006 | 2/10-2/16        | 100                | 51                    | 75             | 86.3      | 58      | 124         | 20      | 34           |
| 36A/36B/36C                           | 2007 | 1/26-2/04        | 50                 | 33                    | 50             | 93.9      | 45      | 139         | 20      | 44           |
| 36A/36B/36C                           | 2008 | 1/25-2/03        | 50                 | 32                    | 48             | 90.6      | 46      | 114         | 22      | 48           |
| 37A                                   | 2005 | 2/04-2/10        | 50                 | 70                    | 50             | 71.4      | 34      | 100         | 3       | 9            |
| 37B                                   | 2004 | 2/06-2/12        | 150                | 167                   | 150            | 85.6      | 133     | 326         | 26      | 20           |
| <b>SPRING HAM</b>                     |      |                  |                    |                       |                |           |         |             |         |              |
| 6A/6B/8                               | 2007 | 2/09-2/18        | 50                 | 117                   | 50             | 41.9      | 46      | 141         | 13      | 28           |
| 6A/6B/8                               | 2008 | 2/08-2/17        | 50                 | 127                   | 48             | 37.8      | 36      | 90          | 4       | 11           |
| 6B                                    | 2004 | 2/13-2/19        | 75                 | 52                    | 75             | 100.0     | 58      | 188         | 10      | 17           |
| 6B                                    | 2005 | 2/11-2/17        | 75                 | 65                    | 75             | 96.9      | 60      | 163         | 16      | 27           |
| 6B                                    | 2006 | 2/17-2/23        | 75                 | 65                    | 75             | 100.0     | 58      | 155         | 5       | 9            |
| 8                                     | 2004 | 2/13-2/19        | 50                 | 38                    | 50             | 100.0     | 47      | 117         | 12      | 26           |
| 8                                     | 2005 | 2/11-2/17        | 50                 | 68                    | 50             | 73.5      | 37      | 77          | 0       | 0            |
| 8                                     | 2006 | 2/17-2/23        | 75                 | 39                    | 75             | 100.0     | 52      | 196         | 10      | 19           |
| 10/18A                                | 2007 | 2/09-2/18        | 100                | 29                    | 100            | 96.6      | 88      | 265         | 20      | 23           |
| 10/18A                                | 2008 | 2/08-2/17        | 100                | 52                    | 100            | 100.0     | 78      | 280         | 15      | 19           |
| 16A                                   | 2007 | 2/09-2/18        | 100                | 34                    | 100            | 100.0     | 84      | 235         | 33      | 39           |
| 16A                                   | 2008 | 2/08-2/17        | 100                | 43                    | 100            | 100.0     | 88      | 265         | 15      | 17           |
| 17                                    | 2007 | 2/09-2/18        | 100                | 58                    | 100            | 100.0     | 93      | 288         | 25      | 27           |
| 17                                    | 2008 | 2/08-2/17        | 100                | 84                    | 100            | 92.9      | 91      | 300         | 27      | 30           |
| 18B                                   | 2004 | 2/13-2/19        | 200                | 236                   | 200            | 78.0      | 170     | 514         | 46      | 27           |
| 18B                                   | 2005 | 2/11-2/17        | 200                | 266                   | 200            | 72.6      | 176     | 616         | 48      | 27           |
| 18B                                   | 2006 | 2/17-2/23        | 200                | 199                   | 200            | 91.5      | 175     | 590         | 55      | 31           |
| 18B                                   | 2007 | 2/09-2/18        | 200                | 180                   | 200            | 78.3      | 182     | 550         | 59      | 32           |
| 18B                                   | 2008 | 2/08-2/17        | 200                | 226                   | 200            | 85.8      | 163     | 488         | 45      | 28           |
| 19A                                   | 2007 | 2/09-2/18        | 100                | 40                    | 100            | 100.0     | 91      | 253         | 15      | 16           |
| 19A                                   | 2008 | 2/08-2/17        | 100                | 57                    | 100            | 100.0     | 90      | 273         | 12      | 13           |
| 19B                                   | 2007 | 2/09-2/18        | 100                | 16                    | 100            | 100.0     | 78      | 227         | 4       | 5            |
| 19B                                   | 2008 | 2/08-2/17        | 100                | 28                    | 91             | 100.0     | 69      | 170         | 17      | 25           |
| 20A                                   | 2007 | 2/09-2/18        | 100                | 49                    | 100            | 100.0     | 91      | 309         | 16      | 18           |
| 20A                                   | 2008 | 2/08-2/17        | 100                | 75                    | 100            | 100.0     | 91      | 277         | 15      | 16           |
| 20B                                   | 2004 | 2/13-2/19        | 450                | 450                   | 450            | 86.0      | 391     | 1120        | 46      | 12           |
| 20B                                   | 2006 | 2/17-2/23        | 450                | 414                   | 450            | 87.2      | 413     | 1155        | 61      | 15           |
| 20B                                   | 2007 | 2/09-2/18        | 325                | 327                   | 325            | 81.7      | 296     | 948         | 57      | 19           |
| 20B                                   | 2008 | 2/08-2/17        | 325                | 329                   | 325            | 88.8      | 289     | 889         | 21      | 7            |
| 20C                                   | 2004 | 2/13-2/19        | 250                | 552                   | 250            | 45.3      | 210     | 719         | 62      | 30           |
| 20C                                   | 2004 | 2/20-2/26        | 250                | 99                    | 250            | 90.9      | 229     | 632         | 45      | 20           |
| 20C                                   | 2005 | 2/11-2/17        | 375                | 615                   | 376            | 57.7      | 285     | 785         | 49      | 17           |
| 20C                                   | 2005 | 2/18-2/24        | 275                | 69                    | 280            | 100.0     | 214     | 562         | 52      | 24           |
| 20C                                   | 2006 | 2/17-2/23        | 375                | 553                   | 375            | 66.6      | 343     | 1017        | 121     | 35           |
| 20C                                   | 2006 | 2/24-3/02        | 275                | 63                    | 275            | 100.0     | 235     | 731         | 72      | 31           |
| 20C                                   | 2007 | 2/09-2/18        | 325                | 552                   | 325            | 57.1      | 301     | 1080        | 49      | 16           |
| 20C                                   | 2008 | 2/08-2/17        | 325                | 367                   | 325            | 84.7      | 270     | 872         | 57      | 21           |
| 21                                    | 2004 | 2/13-2/19        | 275                | 478                   | 275            | 55.4      | 239     | 688         | 42      | 18           |

FTHU = Fort Huachuca

# Javelina Hunt Data

## 5-Year: 2004-2008 Harvest

| Unit                          | Year | Dates Authorized | Permits Authorized | 1st Choice Applicants | Permits Issued | Draw Odds | Hunters | Hunter Days | Harvest | Hunt Success |
|-------------------------------|------|------------------|--------------------|-----------------------|----------------|-----------|---------|-------------|---------|--------------|
| <b>SPRING HAM (continued)</b> |      |                  |                    |                       |                |           |         |             |         |              |
| 21                            | 2005 | 2/11-2/17        | 250                | 466                   | 253            | 51.7      | 172     | 454         | 20      | 12           |
| 21                            | 2006 | 2/17-2/23        | 225                | 373                   | 225            | 60.3      | 190     | 500         | 38      | 20           |
| 21                            | 2007 | 2/09-2/18        | 225                | 326                   | 225            | 62.3      | 191     | 650         | 34      | 18           |
| 21                            | 2008 | 2/08-2/17        | 200                | 280                   | 200            | 69.3      | 168     | 488         | 21      | 13           |
| 22                            | 2004 | 2/13-2/19        | 500                | 721                   | 500            | 60.3      | 439     | 1273        | 74      | 17           |
| 22                            | 2005 | 2/11-2/17        | 450                | 518                   | 458            | 68.2      | 313     | 773         | 28      | 9            |
| 22                            | 2006 | 2/17-2/23        | 450                | 573                   | 450            | 66.7      | 361     | 1130        | 45      | 12           |
| 22                            | 2007 | 2/09-2/18        | 325                | 385                   | 325            | 72.2      | 294     | 911         | 66      | 22           |
| 22                            | 2008 | 2/08-2/17        | 300                | 362                   | 300            | 66.6      | 265     | 788         | 43      | 16           |
| 23                            | 2004 | 2/13-2/19        | 300                | 583                   | 300            | 49.7      | 272     | 813         | 62      | 23           |
| 23                            | 2005 | 2/11-2/17        | 300                | 545                   | 303            | 51.7      | 213     | 674         | 20      | 9            |
| 23                            | 2007 | 2/09-2/18        | 150                | 374                   | 150            | 40.1      | 128     | 405         | 37      | 29           |
| 23                            | 2008 | 2/08-2/17        | 150                | 356                   | 150            | 41.9      | 123     | 442         | 13      | 11           |
| 24A                           | 2004 | 2/13-2/19        | 225                | 218                   | 225            | 78.4      | 195     | 590         | 51      | 26           |
| 24A                           | 2005 | 2/11-2/17        | 225                | 204                   | 228            | 83.8      | 174     | 523         | 40      | 23           |
| 24A                           | 2006 | 2/17-2/23        | 225                | 218                   | 225            | 84.4      | 209     | 610         | 53      | 25           |
| 24A                           | 2007 | 2/09-2/18        | 125                | 170                   | 125            | 60.6      | 103     | 306         | 27      | 26           |
| 24A                           | 2008 | 2/08-2/17        | 125                | 145                   | 125            | 75.2      | 106     | 342         | 18      | 17           |
| 24B                           | 2005 | 2/11-2/17        | 250                | 154                   | 251            | 100.0     | 193     | 513         | 16      | 8            |
| 24B                           | 2006 | 2/17-2/23        | 250                | 201                   | 250            | 100.0     | 205     | 576         | 43      | 21           |
| 24B                           | 2007 | 2/09-2/18        | 150                | 134                   | 150            | 90.3      | 124     | 422         | 17      | 14           |
| 24B                           | 2008 | 2/08-2/17        | 150                | 163                   | 150            | 78.5      | 134     | 464         | 11      | 8            |
| 27                            | 2007 | 2/09-2/18        | 65                 | 7                     | 58             | 100.0     | 39      | 106         | 5       | 13           |
| 27                            | 2008 | 2/08-2/17        | 65                 | 14                    | 24             | 100.0     | 9       | 21          | 0       | 0            |
| 28                            | 2004 | 2/13-2/19        | 100                | 68                    | 100            | 100.0     | 79      | 219         | 33      | 42           |
| 28                            | 2005 | 2/11-2/17        | 100                | 65                    | 101            | 100.0     | 85      | 303         | 9       | 11           |
| 28                            | 2006 | 2/17-2/23        | 100                | 62                    | 100            | 100.0     | 94      | 308         | 38      | 40           |
| 28                            | 2007 | 2/09-2/18        | 85                 | 87                    | 85             | 85.1      | 72      | 248         | 16      | 22           |
| 28                            | 2008 | 2/08-2/17        | 85                 | 50                    | 80             | 96.0      | 67      | 242         | 17      | 25           |
| 29                            | 2004 | 2/13-2/19        | 50                 | 13                    | 50             | 100.0     | 42      | 137         | 10      | 24           |
| 29                            | 2005 | 2/11-2/17        | 50                 | 23                    | 51             | 100.0     | 35      | 91          | 5       | 14           |
| 29                            | 2006 | 2/17-2/23        | 50                 | 18                    | 34             | 100.0     | 27      | 75          | 11      | 41           |
| 29                            | 2007 | 2/09-2/18        | 40                 | 14                    | 27             | 100.0     | 25      | 74          | 13      | 52           |
| 29                            | 2008 | 2/08-2/17        | 40                 | 12                    | 18             | 100.0     | 11      | 36          | 3       | 27           |
| 30A                           | 2004 | 2/13-2/19        | 125                | 58                    | 125            | 100.0     | 97      | 282         | 22      | 23           |
| 30A                           | 2005 | 2/11-2/17        | 125                | 59                    | 125            | 100.0     | 95      | 229         | 30      | 32           |
| 30A                           | 2006 | 2/17-2/23        | 125                | 60                    | 115            | 100.0     | 88      | 241         | 25      | 28           |
| 30A                           | 2007 | 2/09-2/18        | 100                | 37                    | 66             | 89.2      | 56      | 151         | 19      | 34           |
| 30A                           | 2008 | 2/08-2/17        | 100                | 37                    | 73             | 97.3      | 65      | 172         | 32      | 49           |
| 30B                           | 2004 | 2/13-2/19        | 200                | 48                    | 200            | 100.0     | 170     | 515         | 33      | 19           |
| 30B                           | 2005 | 2/11-2/17        | 200                | 27                    | 200            | 100.0     | 131     | 424         | 5       | 4            |
| 30B                           | 2006 | 2/17-2/23        | 150                | 23                    | 87             | 100.0     | 66      | 166         | 4       | 6            |
| 30B                           | 2007 | 2/09-2/18        | 125                | 24                    | 54             | 100.0     | 41      | 133         | 5       | 12           |
| 30B                           | 2008 | 2/08-2/17        | 125                | 25                    | 40             | 100.0     | 31      | 78          | 7       | 23           |
| 31                            | 2004 | 2/13-2/19        | 250                | 95                    | 250            | 100.0     | 222     | 681         | 50      | 23           |
| 31                            | 2005 | 2/11-2/17        | 250                | 101                   | 250            | 100.0     | 182     | 638         | 22      | 12           |
| 31                            | 2006 | 2/17-2/23        | 150                | 86                    | 150            | 100.0     | 132     | 427         | 18      | 14           |
| 31                            | 2007 | 2/09-2/18        | 130                | 46                    | 130            | 100.0     | 100     | 347         | 15      | 15           |
| 31                            | 2008 | 2/08-2/17        | 130                | 63                    | 118            | 92.1      | 104     | 333         | 21      | 20           |
| 32                            | 2004 | 2/13-2/19        | 550                | 398                   | 550            | 100.0     | 481     | 1397        | 90      | 19           |
| 32                            | 2005 | 2/11-2/17        | 500                | 382                   | 505            | 100.0     | 382     | 1180        | 44      | 12           |
| 32                            | 2006 | 2/17-2/23        | 450                | 331                   | 450            | 100.0     | 384     | 1186        | 108     | 28           |
| 32                            | 2007 | 2/09-2/18        | 300                | 317                   | 300            | 89.6      | 243     | 755         | 37      | 15           |
| 32                            | 2008 | 2/08-2/17        | 325                | 224                   | 304            | 97.3      | 265     | 815         | 22      | 8            |
| 33                            | 2004 | 2/13-2/19        | 450                | 243                   | 450            | 100.0     | 394     | 1087        | 60      | 15           |
| 33                            | 2005 | 2/11-2/17        | 450                | 252                   | 449            | 100.0     | 376     | 988         | 66      | 18           |
| 33                            | 2006 | 2/17-2/23        | 450                | 295                   | 446            | 100.0     | 375     | 1188        | 98      | 26           |
| 33                            | 2007 | 2/09-2/18        | 380                | 263                   | 380            | 97.0      | 309     | 938         | 76      | 25           |
| 33                            | 2008 | 2/08-2/17        | 380                | 267                   | 360            | 95.5      | 303     | 807         | 67      | 22           |
| 34A                           | 2004 | 2/13-2/19        | 300                | 136                   | 300            | 100.0     | 245     | 642         | 68      | 28           |
| 34A                           | 2005 | 2/11-2/17        | 300                | 213                   | 300            | 100.0     | 252     | 787         | 22      | 9            |

FTHU = Fort Huachuca



# Javelina Hunt Data

## 5-Year: 2004-2008 Harvest

| Unit                          | Year | Dates Authorized | Permits Authorized | 1st Choice Applicants | Permits Issued | Draw Odds | Hunters | Hunter Days | Harvest | Hunt Success |
|-------------------------------|------|------------------|--------------------|-----------------------|----------------|-----------|---------|-------------|---------|--------------|
| <b>SPRING HAM (continued)</b> |      |                  |                    |                       |                |           |         |             |         |              |
| 34A                           | 2006 | 2/17-2/23        | 300                | 149                   | 300            | 100.0     | 278     | 771         | 62      | 22           |
| 34A                           | 2007 | 2/09-2/18        | 285                | 119                   | 253            | 97.5      | 222     | 656         | 38      | 17           |
| 34A                           | 2008 | 2/08-2/17        | 285                | 121                   | 195            | 98.4      | 173     | 510         | 24      | 14           |
| 34B                           | 2004 | 2/13-2/19        | 75                 | 46                    | 75             | 100.0     | 66      | 182         | 9       | 14           |
| 34B                           | 2005 | 2/11-2/17        | 75                 | 39                    | 75             | 100.0     | 58      | 184         | 7       | 12           |
| 34B                           | 2006 | 2/17-2/23        | 75                 | 29                    | 75             | 100.0     | 69      | 200         | 6       | 9            |
| 34B                           | 2007 | 2/09-2/18        | 30                 | 20                    | 30             | 80.0      | 28      | 79          | 0       | 0            |
| 34B                           | 2008 | 2/08-2/17        | 30                 | 22                    | 22             | 86.4      | 19      | 85          | 6       | 32           |
| 35A                           | 2004 | 2/13-2/19        | 100                | 39                    | 100            | 100.0     | 72      | 221         | 14      | 19           |
| 35A                           | 2005 | 2/11-2/17        | 100                | 49                    | 98             | 100.0     | 80      | 252         | 10      | 13           |
| 35A                           | 2006 | 2/17-2/23        | 100                | 33                    | 82             | 100.0     | 68      | 292         | 14      | 21           |
| 35A                           | 2007 | 2/09-2/18        | 80                 | 47                    | 62             | 89.4      | 42      | 193         | 2       | 5            |
| 35A                           | 2008 | 2/08-2/17        | 80                 | 10                    | 37             | 100.0     | 35      | 99          | 7       | 20           |
| 35B                           | 2004 | 2/13-2/19        | 100                | 37                    | 100            | 100.0     | 86      | 262         | 11      | 13           |
| 35B                           | 2005 | 2/11-2/17        | 100                | 49                    | 100            | 100.0     | 74      | 233         | 8       | 11           |
| 35B                           | 2006 | 2/17-2/23        | 100                | 44                    | 79             | 100.0     | 61      | 198         | 14      | 23           |
| 35B                           | 2007 | 2/09-2/18        | 80                 | 17                    | 57             | 100.0     | 50      | 154         | 4       | 8            |
| 35B                           | 2008 | 2/08-2/17        | 80                 | 15                    | 32             | 100.0     | 28      | 113         | 9       | 32           |
| 36A                           | 2007 | 2/09-2/18        | 165                | 39                    | 111            | 100.0     | 91      | 294         | 26      | 29           |
| 36A                           | 2008 | 2/08-2/17        | 165                | 52                    | 106            | 100.0     | 92      | 258         | 16      | 17           |
| 36B                           | 2004 | 2/13-2/19        | 600                | 289                   | 600            | 100.0     | 507     | 1507        | 84      | 17           |
| 36B                           | 2005 | 2/11-2/17        | 600                | 240                   | 603            | 100.0     | 465     | 1297        | 52      | 11           |
| 36B                           | 2006 | 2/17-2/23        | 600                | 207                   | 391            | 100.0     | 340     | 1056        | 48      | 14           |
| 36B                           | 2007 | 2/09-2/18        | 150                | 134                   | 150            | 94.0      | 132     | 387         | 23      | 17           |
| 36B                           | 2008 | 2/08-2/17        | 150                | 81                    | 122            | 91.4      | 100     | 351         | 20      | 20           |
| 36C                           | 2004 | 2/13-2/19        | 225                | 115                   | 225            | 100.0     | 170     | 507         | 26      | 15           |
| 36C                           | 2005 | 2/11-2/17        | 200                | 100                   | 200            | 100.0     | 159     | 476         | 20      | 13           |
| 36C                           | 2006 | 2/17-2/23        | 150                | 58                    | 131            | 100.0     | 116     | 360         | 9       | 8            |
| 36C                           | 2007 | 2/09-2/18        | 115                | 61                    | 107            | 96.7      | 93      | 278         | 12      | 13           |
| 36C                           | 2008 | 2/08-2/17        | 115                | 22                    | 36             | 100.0     | 27      | 88          | 2       | 7            |
| 37A                           | 2004 | 2/13-2/19        | 350                | 270                   | 350            | 100.0     | 313     | 1003        | 41      | 13           |
| 37A                           | 2005 | 2/11-2/17        | 350                | 269                   | 350            | 100.0     | 298     | 934         | 43      | 14           |
| 37A                           | 2006 | 2/17-2/23        | 350                | 261                   | 350            | 100.0     | 305     | 918         | 55      | 18           |
| 37A                           | 2007 | 2/09-2/18        | 360                | 209                   | 360            | 94.7      | 323     | 1028        | 56      | 17           |
| 37A                           | 2008 | 2/08-2/17        | 360                | 211                   | 360            | 96.7      | 327     | 965         | 33      | 10           |
| 37B                           | 2004 | 2/13-2/19        | 500                | 497                   | 500            | 93.0      | 443     | 1387        | 65      | 15           |
| 37B                           | 2005 | 2/11-2/17        | 650                | 504                   | 656            | 100.0     | 509     | 1501        | 60      | 12           |
| 37B                           | 2006 | 2/17-2/23        | 650                | 514                   | 650            | 100.0     | 582     | 1764        | 128     | 22           |
| 37B                           | 2007 | 2/09-2/18        | 500                | 531                   | 500            | 89.3      | 454     | 1467        | 59      | 13           |
| 37B                           | 2008 | 2/08-2/17        | 500                | 446                   | 497            | 92.6      | 420     | 1367        | 72      | 17           |
| <b>SPRING ARCHERY</b>         |      |                  |                    |                       |                |           |         |             |         |              |
| Various Units                 | 2004 | 1/01-1/31        | 1500               | 1727                  | 1500           | 80.8      | 1313    | 6397        | 409     | 31           |
| Various Units                 | 2005 | 1/01-1/31        | 1800               | 1900                  | 1819           | 89.0      | 1525    | 7887        | 366     | 24           |
| Various Units                 | 2006 | 1/01-1/31        | 2000               | 1759                  | 2000           | 100.0     | 1699    | 8675        | 521     | 31           |
| Various Units                 | 2007 | 1/01-1/25        | 1500               | 1669                  | 1500           | 85.3      | 1289    | 5779        | 486     | 38           |
| Various Units                 | 2008 | 1/01-1/24        | 1750               | 1630                  | 1746           | 94.5      | 1465    | 6679        | 476     | 32           |
| 5/6/8/11M/19A                 | 2008 | 1/01-1/24        | 800                | 639                   | 800            | 98.9      | 676     | 2901        | 234     | 35           |
| 5/6/8/19A                     | 2007 | 1/01-1/25        | 800                | 619                   | 800            | 99.0      | 706     | 3039        | 223     | 32           |
| 5/6/19A                       | 2004 | 1/01-1/31        | 800                | 754                   | 799            | 92.7      | 705     | 3331        | 189     | 27           |
| 5/6/19A                       | 2005 | 1/01-1/31        | 800                | 713                   | 806            | 97.1      | 703     | 3353        | 151     | 21           |
| 5/6/19A                       | 2006 | 1/01-1/31        | 800                | 776                   | 800            | 94.7      | 725     | 3720        | 203     | 28           |
| 20A/20C                       | 2004 | 1/01-1/31        | 500                | 742                   | 500            | 65.6      | 448     | 2175        | 134     | 30           |
| 20A/20C                       | 2005 | 1/01-1/31        | 500                | 767                   | 504            | 63.4      | 446     | 1951        | 109     | 24           |
| 20A/20C                       | 2006 | 1/01-1/31        | 500                | 720                   | 500            | 68.3      | 426     | 2000        | 108     | 25           |
| 20A/20C                       | 2007 | 1/01-1/25        | 400                | 580                   | 400            | 67.1      | 363     | 1691        | 104     | 29           |
| 20A/20C                       | 2008 | 1/01-1/24        | 400                | 537                   | 400            | 71.9      | 366     | 1740        | 112     | 31           |
| 20B                           | 2004 | 1/01-1/31        | 350                | 581                   | 350            | 58.5      | 322     | 1451        | 79      | 25           |
| 20B                           | 2005 | 1/01-1/31        | 475                | 534                   | 478            | 71.7      | 440     | 1942        | 76      | 17           |
| 20B                           | 2006 | 1/01-1/31        | 500                | 617                   | 500            | 76.5      | 468     | 2080        | 112     | 24           |
| 20B                           | 2007 | 1/01-1/25        | 475                | 474                   | 475            | 89.5      | 433     | 1755        | 127     | 29           |
| 20B                           | 2008 | 1/01-1/24        | 475                | 441                   | 475            | 93.4      | 416     | 1795        | 97      | 23           |

FTHU = Fort Huachuca

# Javelina Hunt Data

## 5-Year: 2004-2008 Harvest

| Unit                              | Year | Dates Authorized | Permits Authorized | 1st Choice Applicants | Permits Issued | Draw Odds | Hunters | Hunter Days | Harvest | Hunt Success |
|-----------------------------------|------|------------------|--------------------|-----------------------|----------------|-----------|---------|-------------|---------|--------------|
| <b>SPRING ARCHERY (continued)</b> |      |                  |                    |                       |                |           |         |             |         |              |
| 21                                | 2004 | 1/01-1/31        | 450                | 804                   | 450            | 54.6      | 382     | 1593        | 102     | 27           |
| 21                                | 2005 | 1/01-1/31        | 400                | 690                   | 401            | 57.1      | 343     | 1380        | 73      | 21           |
| 21                                | 2006 | 1/01-1/31        | 375                | 521                   | 375            | 70.8      | 329     | 1377        | 63      | 19           |
| 21                                | 2007 | 1/01-1/25        | 350                | 474                   | 350            | 72.4      | 305     | 1140        | 83      | 27           |
| 21                                | 2008 | 1/01-1/24        | 420                | 562                   | 420            | 73.5      | 376     | 1434        | 95      | 25           |
| 22                                | 2004 | 1/01-1/31        | 600                | 893                   | 600            | 60.4      | 536     | 2372        | 92      | 17           |
| 22                                | 2005 | 1/01-1/31        | 475                | 764                   | 479            | 56.4      | 411     | 1858        | 76      | 18           |
| 22                                | 2006 | 1/01-1/31        | 475                | 672                   | 475            | 63.0      | 405     | 2019        | 126     | 31           |
| 22                                | 2007 | 1/01-1/25        | 500                | 551                   | 500            | 75.9      | 420     | 1540        | 97      | 23           |
| 22                                | 2008 | 1/01-1/24        | 550                | 598                   | 550            | 83.1      | 453     | 1836        | 111     | 25           |
| 23                                | 2004 | 1/01-1/31        | 225                | 515                   | 225            | 43.3      | 197     | 887         | 54      | 27           |
| 23                                | 2005 | 1/01-1/31        | 225                | 552                   | 232            | 40.8      | 194     | 957         | 33      | 17           |
| 23                                | 2006 | 1/01-1/31        | 225                | 564                   | 225            | 39.7      | 208     | 948         | 82      | 39           |
| 23                                | 2007 | 1/01-1/25        | 225                | 543                   | 225            | 41.4      | 192     | 771         | 78      | 41           |
| 23                                | 2008 | 1/01-1/24        | 275                | 540                   | 275            | 50.9      | 217     | 913         | 60      | 28           |
| 24A                               | 2004 | 1/01-1/31        | 115                | 270                   | 115            | 42.6      | 108     | 559         | 34      | 31           |
| 24A                               | 2005 | 1/01-1/31        | 115                | 280                   | 116            | 41.1      | 109     | 544         | 38      | 35           |
| 24A                               | 2006 | 1/01-1/31        | 130                | 303                   | 130            | 42.9      | 125     | 718         | 46      | 37           |
| 24A                               | 2007 | 1/01-1/25        | 175                | 219                   | 175            | 76.3      | 166     | 814         | 65      | 39           |
| 24A                               | 2008 | 1/01-1/24        | 200                | 245                   | 200            | 73.9      | 179     | 685         | 59      | 33           |
| 24B                               | 2004 | 1/01-1/31        | 250                | 306                   | 250            | 70.6      | 217     | 1043        | 35      | 16           |
| 24B                               | 2005 | 1/01-1/31        | 250                | 226                   | 252            | 79.2      | 231     | 997         | 34      | 15           |
| 24B                               | 2006 | 1/01-1/31        | 250                | 251                   | 250            | 76.9      | 216     | 983         | 50      | 23           |
| 24B                               | 2007 | 1/01-1/25        | 225                | 213                   | 225            | 90.1      | 196     | 769         | 42      | 21           |
| 24B                               | 2008 | 1/01-1/24        | 250                | 174                   | 250            | 98.9      | 218     | 933         | 52      | 24           |
| 25M/26M/47M                       | 2007 | 1/01-1/25        | 175                | 111                   | 175            | 99.1      | 143     | 791         | 54      | 38           |
| 25M/26M/47M                       | 2008 | 1/01-1/24        | 175                | 135                   | 175            | 100.0     | 138     | 674         | 37      | 27           |
| 27                                | 2007 | 1/01-1/25        | 100                | 40                    | 88             | 92.5      | 70      | 388         | 10      | 14           |
| 27                                | 2008 | 1/01-1/24        | 100                | 31                    | 71             | 93.6      | 62      | 277         | 14      | 23           |
| 27/28/29/30/31/32                 | 2004 | 1/01-1/31        | 1500               | 1281                  | 1498           | 100.0     | 1297    | 6309        | 487     | 38           |
| 27/28/29/30/31/32                 | 2005 | 1/01-1/31        | 1500               | 1361                  | 1522           | 100.0     | 1303    | 6651        | 379     | 29           |
| 27/28/29/30/31/32                 | 2006 | 1/01-1/31        | 1500               | 1170                  | 1500           | 100.0     | 1311    | 6226        | 387     | 30           |
| 28/29/30/31/32                    | 2007 | 1/01-1/25        | 1200               | 922                   | 1200           | 86.8      | 1017    | 4459        | 325     | 32           |
| 28/29/30/31/32                    | 2008 | 1/01-1/24        | 1200               | 787                   | 1042           | 87.9      | 914     | 4298        | 313     | 34           |
| 33/37B                            | 2004 | 1/01-1/31        | 1150               | 900                   | 1153           | 100.0     | 1049    | 5255        | 286     | 27           |
| 33/37B                            | 2005 | 1/01-1/31        | 1150               | 1016                  | 1155           | 100.0     | 1040    | 5188        | 249     | 24           |
| 33/37B                            | 2006 | 1/01-1/31        | 1250               | 1108                  | 1250           | 100.0     | 1109    | 5651        | 277     | 25           |
| 33/37B                            | 2007 | 1/01-1/25        | 1250               | 899                   | 1250           | 99.0      | 1066    | 4993        | 247     | 23           |
| 33/37B                            | 2008 | 1/01-1/24        | 1250               | 823                   | 1216           | 96.6      | 1115    | 4817        | 278     | 25           |
| 34A/37A/37M                       | 2004 | 1/01-1/31        | 900                | 595                   | 899            | 100.0     | 798     | 3983        | 219     | 27           |
| 34A/37A/37M                       | 2005 | 1/01-1/31        | 900                | 579                   | 898            | 100.0     | 804     | 4178        | 192     | 24           |
| 34A/37A/37M                       | 2006 | 1/01-1/31        | 900                | 599                   | 898            | 100.0     | 787     | 4068        | 210     | 27           |
| 34A/37A/38M                       | 2007 | 1/01-1/25        | 700                | 485                   | 700            | 98.4      | 625     | 2919        | 171     | 27           |
| 34A/37A/38M                       | 2008 | 1/01-1/24        | 700                | 461                   | 634            | 96.8      | 580     | 3063        | 133     | 23           |
| 34B/35A/35B                       | 2004 | 1/01-1/31        | 300                | 193                   | 300            | 100.0     | 243     | 1396        | 100     | 41           |
| 34B/35A/35B                       | 2005 | 1/01-1/31        | 300                | 187                   | 298            | 100.0     | 261     | 1398        | 75      | 29           |
| 34B/35A/35B                       | 2006 | 1/01-1/31        | 300                | 155                   | 234            | 100.0     | 213     | 1087        | 70      | 33           |
| 34B/35A/35B                       | 2007 | 1/01-1/25        | 325                | 128                   | 197            | 100.0     | 171     | 971         | 61      | 36           |
| 34B/35A/35B                       | 2008 | 1/01-1/24        | 300                | 130                   | 171            | 96.9      | 159     | 903         | 46      | 29           |
| 36A/36B/36C                       | 2004 | 1/01-1/31        | 600                | 650                   | 600            | 88.8      | 533     | 2979        | 120     | 23           |
| 36A/36B/36C                       | 2005 | 1/01-1/31        | 600                | 650                   | 616            | 89.1      | 541     | 3218        | 142     | 26           |
| 36A/36B/36C                       | 2006 | 1/01-1/31        | 600                | 490                   | 600            | 100.0     | 520     | 2767        | 130     | 25           |
| 36A/36B/36C                       | 2007 | 1/01-1/25        | 800                | 373                   | 566            | 99.5      | 497     | 2620        | 125     | 25           |
| 36A/36B/36C                       | 2008 | 1/01-1/24        | 800                | 317                   | 498            | 99.7      | 407     | 2060        | 105     | 26           |
| 39M/42M                           | 2004 | 1/01-1/31        | 175                | 129                   | 175            | 100.0     | 157     | 682         | 53      | 34           |
| 39M/42M                           | 2005 | 1/01-1/31        | 175                | 116                   | 177            | 100.0     | 137     | 733         | 34      | 25           |
| 39M/42M                           | 2006 | 1/01-1/31        | 175                | 133                   | 175            | 100.0     | 145     | 724         | 63      | 43           |
| FTHU                              | 2004 | 1/01-1/31        | 20                 | 15                    | 20             | 100.0     | 19      | 163         | 5       | 26           |
| FTHU                              | 2005 | 1/01-1/31        | 20                 | 16                    | 18             | 100.0     | 18      | 129         | 11      | 61           |
| FTHU                              | 2006 | 1/01-1/31        | 20                 | 23                    | 18             | 78.3      | 17      | 131         | 4       | 24           |
| FTHU                              | 2007 | 1/01-1/31        | 20                 | 11                    | 16             | 100.0     | 16      | 132         | 7       | 44           |
| FTHU                              | 2008 | 1/01-1/31        | 16                 | 15                    | 16             | 86.7      | 16      | 102         | 7       | 44           |

FTHU = Fort Huachuca

# Javelina Hunt Data

## 5-Year: 2004-2008 Harvest

| Unit                    | Year | Dates Authorized | Permits Authorized | 1st Choice Applicants | Permits Issued | Draw Odds | Hunters | Hunter Days | Harvest | Hunt Success |
|-------------------------|------|------------------|--------------------|-----------------------|----------------|-----------|---------|-------------|---------|--------------|
| <b>FALL GENERAL</b>     |      |                  |                    |                       |                |           |         |             |         |              |
| 28                      | 2006 | 11/10-11/19      | 50                 | 262                   | 50             | 17.2      | 25      | 82          | 7       | 28           |
| 28                      | 2007 | 11/09-11/18      | 50                 | 164                   | 50             | 29.3      | 40      | 145         | 5       | 13           |
| 29                      | 2006 | 11/10-11/19      | 40                 | 61                    | 38             | 34.4      | 10      | 35          | 0       | 0            |
| 29                      | 2007 | 11/09-11/18      | 40                 | 56                    | 40             | 41.1      | 22      | 74          | 0       | 0            |
| 30A                     | 2006 | 11/10-11/19      | 50                 | 175                   | 50             | 22.9      | 31      | 94          | 8       | 26           |
| 30A                     | 2007 | 11/09-11/18      | 50                 | 71                    | 50             | 50.7      | 35      | 128         | 5       | 14           |
| 30B                     | 2006 | 11/10-11/19      | 20                 | 64                    | 20             | 25.0      | 12      | 28          | 0       | 0            |
| 30B                     | 2007 | 11/09-11/18      | 20                 | 57                    | 20             | 35.1      | 11      | 40          | 6       | 55           |
| 31                      | 2006 | 11/10-11/19      | 30                 | 208                   | 30             | 14.4      | 19      | 74          | 0       | 0            |
| 31                      | 2007 | 11/09-11/18      | 30                 | 146                   | 30             | 20.6      | 8       | 19          | 4       | 50           |
| 32                      | 2006 | 11/10-11/19      | 75                 | 313                   | 75             | 18.9      | 49      | 107         | 12      | 24           |
| 32                      | 2007 | 11/09-11/18      | 75                 | 215                   | 75             | 31.2      | 60      | 192         | 29      | 48           |
| 33                      | 2006 | 11/10-11/19      | 105                | 653                   | 104            | 13.5      | 63      | 137         | 4       | 6            |
| 33                      | 2007 | 11/09-11/18      | 105                | 502                   | 105            | 20.7      | 61      | 193         | 18      | 30           |
| 34A                     | 2006 | 11/10-11/19      | 60                 | 209                   | 60             | 23.9      | 48      | 128         | 15      | 31           |
| 34A                     | 2007 | 11/09-11/18      | 60                 | 163                   | 60             | 25.8      | 43      | 124         | 4       | 9            |
| 34B                     | 2006 | 11/10-11/19      | 15                 | 45                    | 15             | 24.4      | 13      | 35          | 0       | 0            |
| 34B                     | 2007 | 11/09-11/18      | 15                 | 27                    | 15             | 22.2      | 11      | 34          | 4       | 36           |
| 35A                     | 2006 | 11/10-11/19      | 15                 | 78                    | 15             | 19.2      | 15      | 50          | 0       | 0            |
| 35A                     | 2007 | 11/09-11/18      | 15                 | 45                    | 15             | 31.1      | 8       | 26          | 0       | 0            |
| 35B                     | 2006 | 11/10-11/19      | 15                 | 52                    | 15             | 26.9      | 15      | 30          | 8       | 53           |
| 35B                     | 2007 | 11/09-11/18      | 15                 | 41                    | 15             | 36.6      | 13      | 47          | 6       | 46           |
| 36A                     | 2006 | 11/10-11/19      | 75                 | 184                   | 75             | 31.5      | 50      | 211         | 7       | 14           |
| 36A                     | 2007 | 11/09-11/18      | 75                 | 162                   | 75             | 41.4      | 63      | 208         | 13      | 21           |
| 36B                     | 2006 | 11/10-11/19      | 60                 | 224                   | 60             | 25.9      | 44      | 161         | 9       | 20           |
| 36B                     | 2007 | 11/09-11/18      | 60                 | 176                   | 60             | 32.4      | 44      | 196         | 3       | 7            |
| 36C                     | 2006 | 11/10-11/19      | 50                 | 123                   | 50             | 35.8      | 25      | 71          | 10      | 40           |
| 36C                     | 2007 | 11/09-11/18      | 50                 | 97                    | 50             | 41.2      | 31      | 97          | 6       | 19           |
| 37A                     | 2006 | 11/10-11/19      | 120                | 491                   | 120            | 17.7      | 98      | 262         | 27      | 28           |
| 37A                     | 2007 | 11/09-11/18      | 120                | 372                   | 120            | 19.6      | 89      | 226         | 10      | 11           |
| 37B                     | 2006 | 11/10-11/19      | 140                | 1295                  | 140            | 10.7      | 103     | 331         | 26      | 25           |
| 37B                     | 2007 | 11/09-11/18      | 140                | 860                   | 140            | 16.3      | 110     | 364         | 9       | 8            |
| <b>FALL JUNIOR ONLY</b> |      |                  |                    |                       |                |           |         |             |         |              |
| 16A                     | 2008 | 10/10-10/16      | 50                 | 36                    | 37             | 94.4      | 31      | 107         | 6       | 19           |
| 17B                     | 2008 | 10/10-10/16      | 50                 | 46                    | 50             | 87.0      | 39      | 106         | 11      | 28           |
| 18B                     | 2008 | 11/21-11/30      | 75                 | 55                    | 72             | 94.6      | 55      | 142         | 31      | 56           |
| 20A                     | 2008 | 10/10-10/16      | 50                 | 88                    | 50             | 56.8      | 33      | 98          | 4       | 12           |
| 28                      | 2008 | 10/10-10/16      | 50                 | 28                    | 37             | 96.4      | 33      | 90          | 8       | 24           |
| 28                      | 2008 | 11/21-11/27      | 50                 | 10                    | 14             | 100.0     | 14      | 33          | 9       | 64           |
| 29                      | 2008 | 10/10-10/16      | 50                 | 1                     | 3              | 100.0     | 3       | 5           | 1       | 33           |
| 29                      | 2008 | 11/21-11/27      | 50                 | 2                     | 2              | 100.0     | 0       | 0           | 0       | —            |
| 30A                     | 2008 | 10/10-10/16      | 50                 | 11                    | 15             | 100.0     | 13      | 30          | 2       | 15           |
| 30A                     | 2008 | 11/21-11/27      | 50                 | 2                     | 3              | 100.0     | 3       | 6           | 2       | 67           |
| 30B                     | 2008 | 10/10-10/16      | 50                 | 0                     | 3              | —         | 3       | 8           | 0       | 0            |
| 30B                     | 2008 | 11/21-11/27      | 50                 | 1                     | 1              | 100.0     | 1       | 2           | 0       | 0            |
| 31                      | 2008 | 10/10-10/16      | 50                 | 23                    | 23             | 73.9      | 17      | 50          | 4       | 24           |
| 31                      | 2008 | 11/21-11/27      | 50                 | 5                     | 8              | 100.0     | 4       | 12          | 0       | 0            |
| 32                      | 2008 | 10/10-10/16      | 100                | 12                    | 22             | 91.7      | 11      | 24          | 2       | 18           |
| 32                      | 2008 | 11/21-11/27      | 100                | 19                    | 20             | 84.2      | 15      | 30          | 8       | 53           |
| 33                      | 2008 | 10/10-10/16      | 135                | 73                    | 73             | 86.3      | 57      | 149         | 7       | 12           |
| 33                      | 2008 | 11/21-11/27      | 135                | 43                    | 58             | 90.7      | 44      | 105         | 9       | 20           |
| 34A                     | 2008 | 10/10-10/16      | 100                | 8                     | 11             | 100.0     | 11      | 44          | 6       | 55           |
| 34A                     | 2008 | 11/21-11/27      | 100                | 4                     | 4              | 100.0     | 2       | 7           | 1       | 50           |
| 34B                     | 2008 | 10/10-10/16      | 25                 | 2                     | 3              | 100.0     | 0       | 0           | 0       | —            |
| 34B                     | 2008 | 11/21-11/27      | 25                 | 2                     | 5              | 100.0     | 5       | 10          | 5       | 100          |
| 35A                     | 2008 | 10/10-10/16      | 25                 | 3                     | 7              | 100.0     | 6       | 14          | 0       | 0            |
| 35A                     | 2008 | 11/21-11/27      | 25                 | 2                     | 3              | 100.0     | 3       | 9           | 0       | 0            |
| 35B                     | 2008 | 10/10-10/16      | 25                 | 1                     | 1              | 100.0     | 1       | 2           | 0       | 0            |
| 35B                     | 2008 | 11/21-11/27      | 25                 | 2                     | 2              | 100.0     | 0       | 0           | 0       | —            |
| 36A                     | 2008 | 10/10-10/16      | 70                 | 8                     | 10             | 100.0     | 7       | 20          | 0       | 0            |
| 36A                     | 2008 | 11/21-11/27      | 70                 | 4                     | 18             | 100.0     | 18      | 76          | 4       | 22           |

FTHU = Fort Huachuca

# Javelina Hunt Data

## 5-Year: 2004-2008 Harvest

| Unit                                | Year | Dates Authorized | Permits Authorized | 1st Choice Applicants | Permits Issued | Draw Odds | Hunters | Hunter Days | Harvest | Hunt Success |
|-------------------------------------|------|------------------|--------------------|-----------------------|----------------|-----------|---------|-------------|---------|--------------|
| <b>FALL JUNIOR ONLY (continued)</b> |      |                  |                    |                       |                |           |         |             |         |              |
| 36B                                 | 2008 | 10/10-10/16      | 100                | 7                     | 8              | 100.0     | 4       | 8           | 0       | 0            |
| 36B                                 | 2008 | 11/21-11/27      | 100                | 7                     | 12             | 100.0     | 10      | 31          | 5       | 50           |
| 36C                                 | 2008 | 10/10-10/16      | 75                 | 1                     | 2              | 100.0     | 0       | 0           | 0       | —            |
| 36C                                 | 2008 | 11/21-11/27      | 75                 | 4                     | 2              | 25.0      | 0       | 0           | 0       | —            |
| 37A                                 | 2008 | 10/10-10/16      | 125                | 18                    | 27             | 100.0     | 20      | 52          | 2       | 10           |
| 37A                                 | 2008 | 11/21-11/27      | 125                | 8                     | 13             | 100.0     | 13      | 35          | 4       | 31           |
| 37B                                 | 2008 | 10/10-10/16      | 170                | 29                    | 46             | 100.0     | 39      | 96          | 0       | 0            |
| 37B                                 | 2008 | 11/21-11/27      | 165                | 38                    | 51             | 100.0     | 38      | 102         | 3       | 8            |
| 39 (Archery)                        | 2007 | 11/02-11/15      | 15                 | 11                    | 10             | 90.9      | 8       | 20          | 0       | 0            |
| 39 (Muzzleloader)                   | 2007 | 11/16-11/25      | 10                 | 7                     | 10             | 85.7      | 10      | 15          | 5       | 50           |
| 39 (Archery)                        | 2008 | 11/07-11/16      | 15                 | 4                     | 5              | 75.0      | 5       | 5           | 0       | 0            |
| 39 (Muzzleloader)                   | 2008 | 11/21-11/27      | 10                 | 4                     | 5              | 75.0      | 3       | 10          | 0       | 0            |
| <b>FALL HAM</b>                     |      |                  |                    |                       |                |           |         |             |         |              |
| 28                                  | 2006 | 10/13-10/22      | 15                 | 61                    | 15             | 21.3      | 11      | 41          | 4       | 36           |
| 28                                  | 2007 | 10/12-10/21      | 15                 | 29                    | 15             | 41.4      | 15      | 35          | 0       | 0            |
| 29                                  | 2006 | 10/13-10/22      | 10                 | 18                    | 10             | 55.6      | 7       | 13          | 0       | 0            |
| 29                                  | 2007 | 10/12-10/21      | 10                 | 10                    | 10             | 90.0      | 8       | 28          | 3       | 38           |
| 30A                                 | 2006 | 10/13-10/22      | 20                 | 21                    | 20             | 71.4      | 15      | 45          | 0       | 0            |
| 30A                                 | 2007 | 10/12-10/21      | 20                 | 29                    | 20             | 69.0      | 4       | 8           | 0       | 0            |
| 30B                                 | 2006 | 10/13-10/22      | 25                 | 29                    | 25             | 65.5      | 13      | 25          | 0       | 0            |
| 30B                                 | 2007 | 10/12-10/21      | 25                 | 16                    | 25             | 81.3      | 8       | 28          | 0       | 0            |
| 31                                  | 2006 | 10/13-10/22      | 20                 | 50                    | 20             | 36.0      | 13      | 27          | 3       | 23           |
| 31                                  | 2007 | 10/12-10/21      | 20                 | 35                    | 20             | 25.7      | 15      | 45          | 3       | 20           |
| 32                                  | 2006 | 10/13-10/22      | 70                 | 123                   | 70             | 39.8      | 45      | 138         | 2       | 4            |
| 32                                  | 2007 | 10/12-10/21      | 70                 | 89                    | 70             | 61.8      | 51      | 154         | 0       | 0            |
| 33                                  | 2006 | 10/13-10/22      | 70                 | 178                   | 70             | 27.5      | 48      | 135         | 10      | 21           |
| 33                                  | 2007 | 10/12-10/21      | 70                 | 149                   | 70             | 37.6      | 60      | 145         | 13      | 22           |
| 34A                                 | 2006 | 10/13-10/22      | 45                 | 112                   | 45             | 33.9      | 39      | 119         | 0       | 0            |
| 34A                                 | 2007 | 10/12-10/21      | 45                 | 66                    | 45             | 56.1      | 39      | 139         | 6       | 15           |
| 34B                                 | 2006 | 10/13-10/22      | 10                 | 24                    | 10             | 33.3      | 10      | 23          | 0       | 0            |
| 34B                                 | 2007 | 10/12-10/21      | 10                 | 15                    | 10             | 53.3      | 8       | 24          | 0       | 0            |
| 35A                                 | 2006 | 10/13-10/22      | 15                 | 15                    | 15             | 66.7      | 13      | 35          | 0       | 0            |
| 35A                                 | 2007 | 10/12-10/21      | 15                 | 22                    | 15             | 59.1      | 12      | 23          | 0       | 0            |
| 35B                                 | 2006 | 10/13-10/22      | 15                 | 12                    | 15             | 50.0      | 15      | 49          | 0       | 0            |
| 35B                                 | 2007 | 10/12-10/21      | 15                 | 18                    | 15             | 61.1      | 8       | 28          | 0       | 0            |
| 36A                                 | 2006 | 10/13-10/22      | 25                 | 38                    | 25             | 57.9      | 22      | 78          | 3       | 14           |
| 36A                                 | 2007 | 10/12-10/21      | 25                 | 17                    | 25             | 82.4      | 19      | 71          | 0       | 0            |
| 36B                                 | 2006 | 10/13-10/22      | 90                 | 96                    | 89             | 63.5      | 61      | 161         | 8       | 13           |
| 36B                                 | 2007 | 10/12-10/21      | 90                 | 42                    | 90             | 97.6      | 57      | 163         | 7       | 12           |
| 36C                                 | 2006 | 10/13-10/22      | 25                 | 38                    | 25             | 44.7      | 18      | 42          | 2       | 11           |
| 36C                                 | 2007 | 10/12-10/21      | 25                 | 22                    | 25             | 90.9      | 21      | 69          | 2       | 10           |
| 37A                                 | 2006 | 10/13-10/22      | 50                 | 159                   | 50             | 22.0      | 48      | 140         | 6       | 13           |
| 37A                                 | 2007 | 10/12-10/21      | 50                 | 107                   | 50             | 29.9      | 40      | 118         | 3       | 8            |
| 37B                                 | 2006 | 10/13-10/22      | 100                | 407                   | 100            | 17.0      | 77      | 214         | 5       | 6            |
| 37B                                 | 2007 | 10/12-10/21      | 100                | 299                   | 100            | 26.8      | 82      | 287         | 13      | 16           |
| <b>FALL ARCHERY</b>                 |      |                  |                    |                       |                |           |         |             |         |              |
| 27/28/29/30A/31/32                  | 2006 | 9/01-9/10        | 165                | 287                   | 160            | 49.1      | 96      | 343         | 0       | 0            |
| 28/29/30A/31/32                     | 2007 | 8/24-9/02        | 165                | 116                   | 165            | 97.4      | 113     | 345         | 5       | 4            |
| 30B                                 | 2006 | 9/01-9/10        | 35                 | 21                    | 35             | 95.2      | 25      | 66          | 0       | 0            |
| 30B                                 | 2007 | 8/24-9/02        | 35                 | 18                    | 27             | 83.3      | 16      | 59          | 0       | 0            |
| 33/37B                              | 2006 | 9/01-9/10        | 190                | 242                   | 190            | 61.2      | 130     | 391         | 16      | 12           |
| 33/37B                              | 2007 | 8/24-9/02        | 190                | 160                   | 190            | 96.3      | 125     | 372         | 5       | 4            |
| 34A/37A/38M                         | 2006 | 9/01-9/10        | 135                | 135                   | 132            | 80.7      | 86      | 242         | 2       | 2            |
| 34A/37A/38M                         | 2007 | 8/24-9/02        | 135                | 91                    | 135            | 98.9      | 103     | 368         | 8       | 8            |
| 34B/35A/35B                         | 2006 | 9/01-9/10        | 45                 | 47                    | 45             | 76.6      | 28      | 132         | 3       | 11           |
| 34B/35A/35B                         | 2007 | 8/24-9/02        | 45                 | 25                    | 38             | 100.0     | 26      | 88          | 3       | 12           |
| 36A/36B/36C                         | 2006 | 9/01-9/10        | 90                 | 87                    | 89             | 89.7      | 61      | 189         | 0       | 0            |
| 36A/36B/36C                         | 2007 | 8/24-9/02        | 90                 | 48                    | 90             | 100.0     | 62      | 211         | 0       | 0            |

FTHU = Fort Huachuca

---

# Bighorn Sheep (*Ovis canadensis*)

---

## *Natural History*

Arizona's bighorn sheep population, consisting of both Rocky Mountain and desert races, is currently estimated at about 6,000 animals—a severe reduction from the numbers thought to once be present. The causes for this decline, which occurred primarily between 1860 and 1920, were exposure to livestock-borne parasites and

diseases. Now, thanks to livestock-free refuges and an aggressive translocation program, bighorn sheep numbers are gradually edging upward.

Desert bighorn sheep weights vary considerably between the sexes. Adult rams weigh 160 and 200 pounds, with a maximum weight of 225 pounds. Adult ewes range from 75 to 130 pounds and average 110 pounds. The biggest visual difference between the

two sexes is the horns. Ewe horns are generally 10 to 13 inches long with a circumference of three to six inches. An adult ram's horns may measure up to 40 inches along the outside curl with a basal circumference between 13 and 16 inches. The horn core is honeycombed with chambers, or sinuses, which reduce the weight of the skull.

Newborn bighorn lambs weigh from 8 to 10 pounds, have dark eyes and fuzzy, dark-gray hair, and are active within minutes of birth. As the lambs mature, their eyes take on the characteristic amber color of the adult's eyes. After several months, they also take on the adult's pale buff to dark, chocolate-brown coloration. This overall coat color is accentuated by a white muzzle, a white rump patch, light-colored eye rings, and a white edging on the rear legs. The tail is black, bordered in white.

Bighorn sheep have a life expectancy of 10 to 12 years, but may attain an age of 17 years or older. Usually one, rarely two, lambs are born. The youngsters typically stay with their moth-

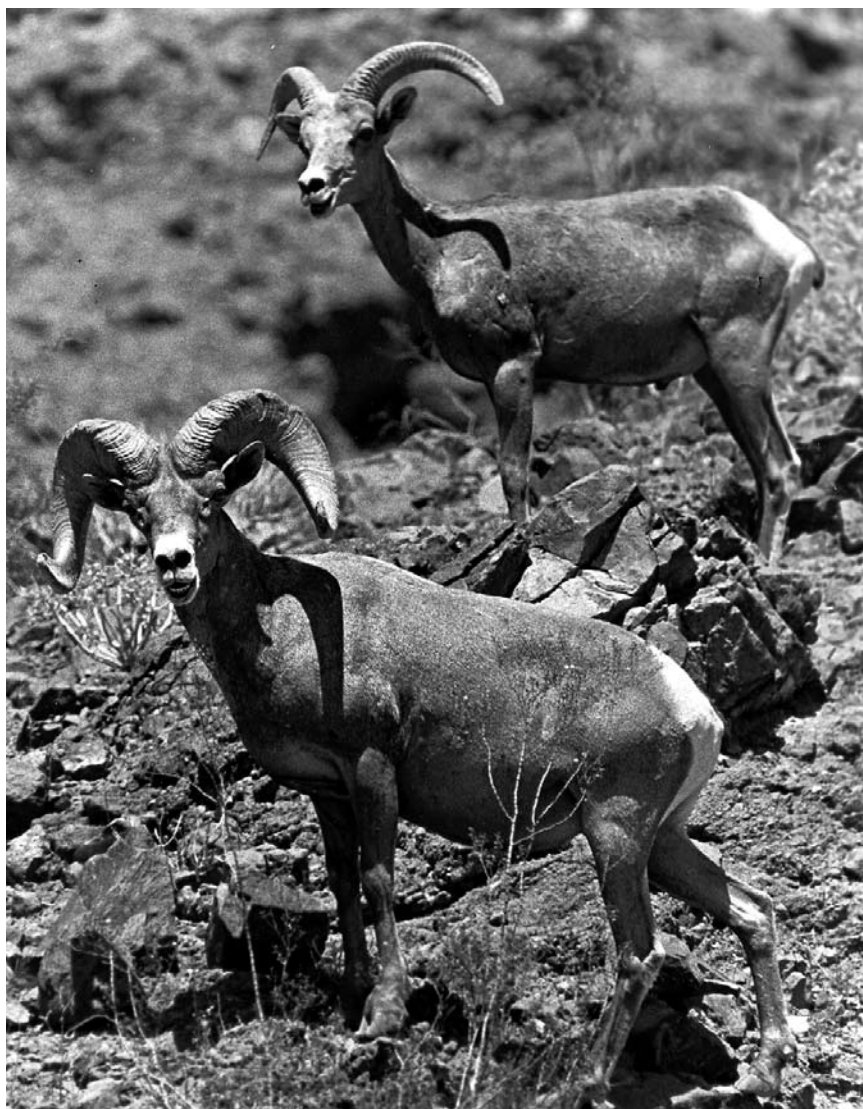

BOB MILES

# Bighorn

ers until two years of age. The young rams then leave the nursery herds of ewes and lambs and join a bachelor herd. The adults usually remain segregated according to sex except during the summer breeding season, and sometimes during the spring with the sprouting of early vegetation.

Sexual maturity varies, both physiologically and behaviorally. Although rams as young as 6 months of age may be capable of breeding, they refrain due to the dominance of older rams. Ewes do not breed until they are about

two-years old, and rams usually not until at least three years of age. The breeding season extends from early June through October, but the peak rutting activity takes place in August. The gestation period is about six months, and most lambs are born in late winter or early spring.

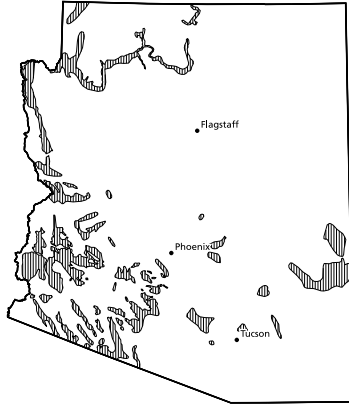

**Bighorn distribution**

Bighorn sheep are diurnal animals and are usually found in small groups, although herds of 50 or more are sometimes seen. Native grasses are important in the bighorn's diet, although the animals also feed heavily on jojoba and other woody plants. Pincushion, barrel, and saguaro cactuses provide needed moisture. Preferred plants vary with habitat quality, locality, and species availability. Mountain lions are the principal predator although golden eagles and bobcats have been observed taking lambs.

## *Hunt History*

Totally protected by the territorial legislature in 1893, bighorn sheep were not legal game in Arizona until 1953, when it was determined that the limited hunting of trophy rams might be the only way to save these animals. Two limited hunts of 20 permits each were authorized, and 20 bighorn were taken. Since then, permit numbers, the number of units open to hunting, the number of rams taken, and hunt success have gradually increased. About 100 rams, mostly desert bighorns, are now being taken each year. This number will only increase, however, when the disease problem and other limiting factors are brought under control.

# Bighorn Survey Data

## *Historic Summary of Desert Bighorn Sheep Survey Data*

| Year | Ram | Ewe  | Lamb | Yearling | Unclassified | Total | Number Per 100 Ewes |       |           |
|------|-----|------|------|----------|--------------|-------|---------------------|-------|-----------|
|      |     |      |      |          |              |       | Rams                | Lambs | Yearlings |
| 1951 | 56  | 46   | 30   | 0        | 9            | 141   | 122                 | 65    | 0         |
| 1952 | 48  | 36   | 15   | 0        | 8            | 107   | 133                 | 42    | 0         |
| 1953 | 59  | 48   | 24   | 0        | 17           | 148   | 123                 | 50    | 0         |
| 1955 | 159 | 129  | 29   | 0        | 41           | 358   | 123                 | 22    | 0         |
| 1956 | 95  | 129  | 29   | 0        | 4            | 257   | 74                  | 22    | 0         |
| 1957 | 43  | 48   | 0    | 0        | 0            | 91    | 90                  | 0     | 0         |
| 1958 | 43  | 77   | 34   | 0        | 3            | 157   | 56                  | 44    | 0         |
| 1959 | 15  | 46   | 10   | 26       | 5            | 102   | 33                  | 22    | 57        |
| 1960 | 26  | 57   | 29   | 13       | 0            | 125   | 46                  | 51    | 23        |
| 1961 | 47  | 106  | 46   | 1        | 0            | 200   | 44                  | 43    | 1         |
| 1962 | 59  | 104  | 43   | 7        | 8            | 221   | 57                  | 41    | 7         |
| 1963 | 47  | 109  | 48   | 6        | 8            | 218   | 43                  | 44    | 6         |
| 1964 | 57  | 181  | 90   | 0        | 18           | 346   | 31                  | 50    | 0         |
| 1965 | 75  | 134  | 69   | 0        | 41           | 319   | 56                  | 51    | 0         |
| 1966 | 111 | 228  | 89   | 0        | 13           | 441   | 49                  | 39    | 0         |
| 1967 | 109 | 341  | 145  | 0        | 46           | 641   | 32                  | 43    | 0         |
| 1968 | 143 | 382  | 207  | 0        | 0            | 732   | 37                  | 54    | 0         |
| 1969 | 142 | 407  | 152  | 0        | 2            | 703   | 35                  | 37    | 0         |
| 1970 | 142 | 464  | 182  | 0        | 9            | 797   | 31                  | 39    | 0         |
| 1971 | 131 | 264  | 138  | 0        | 20           | 553   | 50                  | 52    | 0         |
| 1972 | 132 | 275  | 107  | 0        | 26           | 540   | 48                  | 39    | 0         |
| 1973 | 95  | 214  | 76   | 0        | 7            | 392   | 44                  | 36    | 0         |
| 1974 | 119 | 288  | 137  | 0        | 10           | 554   | 41                  | 48    | 0         |
| 1975 | 213 | 418  | 170  | 0        | 12           | 813   | 51                  | 41    | 0         |
| 1976 | 261 | 542  | 240  | 0        | 4            | 1047  | 48                  | 44    | 0         |
| 1977 | 304 | 567  | 269  | 0        | 30           | 1170  | 54                  | 47    | 0         |
| 1978 | 343 | 604  | 284  | 0        | 29           | 1260  | 57                  | 47    | 0         |
| 1979 | 310 | 713  | 306  | 0        | 39           | 1368  | 43                  | 43    | 0         |
| 1980 | 443 | 1073 | 459  | 0        | 3            | 1978  | 41                  | 43    | 0         |
| 1981 | 374 | 775  | 272  | 0        | 1            | 1422  | 48                  | 35    | 0         |
| 1982 | 478 | 892  | 301  | 0        | 9            | 1680  | 54                  | 34    | 0         |
| 1983 | 554 | 934  | 278  | 0        | 4            | 1770  | 59                  | 30    | 0         |
| 1984 | 527 | 819  | 212  | 173      | 0            | 1731  | 64                  | 26    | 21        |
| 1985 | 590 | 1026 | 308  | 164      | 3            | 2091  | 58                  | 30    | 16        |
| 1986 | 652 | 1137 | 383  | 220      | 2            | 2394  | 57                  | 34    | 19        |
| 1987 | 648 | 1102 | 450  | 257      | 0            | 2457  | 59                  | 41    | 23        |
| 1988 | 711 | 1306 | 470  | 259      | 0            | 2746  | 54                  | 36    | 20        |
| 1989 | 571 | 1095 | 291  | 183      | 0            | 2140  | 52                  | 27    | 17        |
| 1990 | 655 | 980  | 303  | 187      | 4            | 2129  | 67                  | 31    | 19        |
| 1991 | 562 | 1008 | 301  | 190      | 9            | 2070  | 56                  | 30    | 19        |
| 1992 | 696 | 1124 | 283  | 209      | 7            | 2319  | 62                  | 25    | 19        |
| 1993 | 686 | 1051 | 264  | 167      | 5            | 2173  | 65                  | 25    | 16        |
| 1994 | 789 | 1502 | 298  | 241      | 8            | 2838  | 53                  | 20    | 16        |
| 1995 | 624 | 1224 | 299  | 107      | 6            | 2260  | 51                  | 24    | 9         |
| 1996 | 474 | 870  | 134  | 96       | 4            | 1578  | 54                  | 15    | 11        |
| 1997 | 742 | 1375 | 402  | 134      | 1            | 2654  | 54                  | 29    | 10        |
| 1998 | 325 | 733  | 152  | 97       | 3            | 1310  | 44                  | 21    | 13        |
| 1999 | 344 | 660  | 132  | 102      | 2            | 1240  | 52                  | 20    | 15        |
| 2000 | 404 | 803  | 197  | 109      | 5            | 1518  | 50                  | 25    | 14        |
| 2001 | 366 | 812  | 322  | 90       | 5            | 1595  | 45                  | 40    | 11        |
| 2002 | 249 | 443  | 103  | 73       | 5            | 874   | 56                  | 23    | 16        |
| 2003 | 288 | 739  | 224  | 84       | 3            | 1338  | 39                  | 30    | 11        |
| 2004 | 197 | 443  | 179  | 43       | 1            | 863   | 44                  | 40    | 10        |
| 2005 | 213 | 388  | 110  | 54       | 11           | 776   | 55                  | 28    | 14        |
| 2006 | 381 | 635  | 154  | 71       | 8            | 1249  | 60                  | 24    | 11        |
| 2007 | 396 | 690  | 215  | 93       | 9            | 1403  | 57                  | 31    | 13        |
| 2008 | 433 | 764  | 260  | 99       | 7            | 1563  | 57                  | 34    | 13        |



## Bighorn Survey Data

### *Historic Summary of Rocky Mountain Bighorn Sheep Survey Data*

| Year | Ram | Ewe | Lamb | Yearling | Unclassified | Total | Number Per 100 Ewes |       |           |
|------|-----|-----|------|----------|--------------|-------|---------------------|-------|-----------|
|      |     |     |      |          |              |       | Rams                | Lambs | Yearlings |
| 1984 | 20  | 26  | 25   | 13       | 0            | 84    | 77                  | 96    | 50        |
| 1985 | 16  | 22  | 9    | 3        | 0            | 50    | 73                  | 41    | 14        |
| 1986 | 56  | 65  | 36   | 42       | 0            | 199   | 86                  | 55    | 65        |
| 1987 | 54  | 54  | 14   | 40       | 76           | 238   | 100                 | 26    | 74        |
| 1988 | 40  | 66  | 35   | 40       | 0            | 181   | 61                  | 53    | 61        |
| 1989 | 50  | 69  | 41   | 50       | 0            | 210   | 72                  | 59    | 72        |
| 1990 | 62  | 109 | 34   | 23       | 0            | 228   | 57                  | 31    | 21        |
| 1991 | 43  | 68  | 27   | 18       | 0            | 156   | 63                  | 40    | 26        |
| 1992 | 65  | 129 | 72   | 36       | 0            | 302   | 50                  | 56    | 28        |
| 1993 | 75  | 157 | 82   | 18       | 0            | 332   | 48                  | 52    | 11        |
| 1994 | 101 | 186 | 77   | 19       | 0            | 383   | 54                  | 41    | 10        |
| 1995 | 68  | 171 | 82   | 24       | 0            | 345   | 40                  | 48    | 14        |
| 1996 | 72  | 201 | 45   | 31       | 0            | 349   | 36                  | 22    | 15        |
| 1997 | 71  | 150 | 69   | 20       | 12           | 322   | 47                  | 46    | 13        |
| 1998 | 102 | 162 | 72   | 30       | 3            | 369   | 63                  | 44    | 19        |
| 1999 | 65  | 188 | 71   | 25       | 0            | 349   | 35                  | 38    | 13        |
| 2000 | 70  | 202 | 61   | 17       | 2            | 352   | 35                  | 30    | 8         |
| 2001 | 75  | 190 | 60   | 11       | 0            | 336   | 39                  | 32    | 6         |
| 2002 | 84  | 184 | 60   | 29       | 2            | 359   | 46                  | 33    | 16        |
| 2003 | 11  | 25  | 5    | 2        | 0            | 43    | 44                  | 20    | 8         |
| 2004 | 45  | 84  | 32   | 8        | 0            | 169   | 54                  | 38    | 10        |
| 2005 | 89  | 155 | 49   | 17       | 38           | 348   | 57                  | 32    | 11        |
| 2006 | 83  | 172 | 65   | 9        | 2            | 331   | 48                  | 38    | 5         |
| 2007 | 59  | 115 | 62   | 17       | 0            | 253   | 51                  | 54    | 15        |
| 2008 | 117 | 296 | 119  | 44       | 1            | 577   | 40                  | 40    | 15        |

### *Historic Summary of Combined Bighorn Sheep Survey Data*

| Year | Ram | Ewe  | Lamb | Yearling | Unclassified | Total | Number Per 100 Ewes |       |           |
|------|-----|------|------|----------|--------------|-------|---------------------|-------|-----------|
|      |     |      |      |          |              |       | Rams                | Lambs | Yearlings |
| 1984 | 547 | 845  | 237  | 186      | 0            | 1815  | 65                  | 28    | 22        |
| 1985 | 606 | 1048 | 317  | 167      | 3            | 2141  | 58                  | 30    | 16        |
| 1986 | 708 | 1202 | 419  | 262      | 2            | 2593  | 59                  | 35    | 22        |
| 1987 | 702 | 1156 | 464  | 297      | 76           | 2695  | 61                  | 40    | 26        |
| 1988 | 751 | 1372 | 505  | 299      | 0            | 2927  | 55                  | 37    | 22        |
| 1989 | 621 | 1164 | 332  | 233      | 0            | 2350  | 53                  | 29    | 20        |
| 1990 | 717 | 1089 | 337  | 210      | 4            | 2357  | 66                  | 31    | 19        |
| 1991 | 605 | 1076 | 328  | 208      | 9            | 2226  | 56                  | 30    | 19        |
| 1992 | 761 | 1253 | 355  | 245      | 7            | 2621  | 61                  | 28    | 20        |
| 1993 | 761 | 1208 | 346  | 185      | 5            | 2505  | 63                  | 29    | 15        |
| 1994 | 890 | 1688 | 375  | 260      | 8            | 3221  | 53                  | 22    | 15        |
| 1995 | 692 | 1395 | 381  | 131      | 6            | 2605  | 50                  | 27    | 9         |
| 1996 | 546 | 1071 | 179  | 127      | 4            | 1927  | 51                  | 17    | 12        |
| 1997 | 813 | 1525 | 471  | 154      | 13           | 2976  | 53                  | 31    | 10        |
| 1998 | 427 | 895  | 224  | 127      | 6            | 1679  | 48                  | 25    | 14        |
| 1999 | 409 | 848  | 203  | 127      | 2            | 1589  | 48                  | 24    | 15        |
| 2000 | 474 | 1005 | 258  | 126      | 7            | 1870  | 47                  | 26    | 13        |
| 2001 | 441 | 1002 | 382  | 101      | 5            | 1931  | 44                  | 38    | 10        |
| 2002 | 333 | 627  | 163  | 102      | 8            | 1233  | 53                  | 26    | 16        |
| 2003 | 299 | 764  | 229  | 86       | 3            | 1381  | 39                  | 30    | 11        |
| 2004 | 242 | 527  | 211  | 51       | 1            | 1032  | 46                  | 40    | 10        |
| 2005 | 302 | 543  | 159  | 71       | 49           | 1124  | 56                  | 29    | 13        |
| 2006 | 464 | 807  | 219  | 80       | 10           | 1580  | 58                  | 27    | 10        |
| 2007 | 455 | 805  | 277  | 110      | 9            | 1656  | 57                  | 34    | 14        |
| 2008 | 550 | 1060 | 379  | 143      | 8            | 2140  | 52                  | 36    | 13        |

# Bighorn Survey Data

## 5-Year: 2004-2008 Desert Bighorn Sheep Survey Data

| Unit             | Year | Ram | Ewe | Lamb | Yearling | Unclassified | Total | Number per 100 Ewes |       |           |
|------------------|------|-----|-----|------|----------|--------------|-------|---------------------|-------|-----------|
|                  |      |     |     |      |          |              |       | Rams                | Lambs | Yearlings |
| 9/10             | 2006 | 9   | 20  | 5    | 0        | 0            | 34    | 45                  | 25    | 0         |
| 12A/12B West     | 2005 | 5   | 11  | 3    | 2        | 0            | 21    | 45                  | 27    | 18        |
| 12A/12B West     | 2006 | 9   | 8   | 2    | 0        | 0            | 19    | 113                 | 25    | 0         |
| 12A/12B West     | 2008 | 4   | 11  | 0    | 3        | 0            | 18    | 36                  | 0     | 27        |
| 12B East         | 2005 | 8   | 23  | 6    | 2        | 7            | 46    | 35                  | 26    | 9         |
| 12B East         | 2008 | 28  | 44  | 7    | 11       | 0            | 90    | 64                  | 16    | 25        |
| 13A              | 2005 | 18  | 19  | 7    | 0        | 0            | 44    | 95                  | 37    | 0         |
| 13A              | 2006 | 25  | 38  | 4    | 5        | 0            | 72    | 66                  | 11    | 13        |
| 13A              | 2008 | 3   | 5   | 1    | 0        | 0            | 9     | 60                  | 20    | 0         |
| 13B North        | 2005 | 35  | 58  | 19   | 9        | 0            | 121   | 60                  | 33    | 16        |
| 13B North        | 2006 | 32  | 90  | 18   | 13       | 0            | 153   | 36                  | 20    | 14        |
| 13B North        | 2007 | 36  | 93  | 17   | 14       | 0            | 160   | 39                  | 18    | 15        |
| 13B North        | 2008 | 34  | 44  | 8    | 0        | 0            | 86    | 77                  | 18    | 0         |
| 13B South        | 2005 | 8   | 38  | 11   | 3        | 0            | 60    | 21                  | 29    | 8         |
| 13B South        | 2008 | 13  | 22  | 6    | 1        | 0            | 42    | 59                  | 27    | 5         |
| 15A/15B East     | 2004 | 7   | 20  | 11   | 0        | 0            | 38    | 35                  | 55    | 0         |
| 15A/15B East     | 2007 | 3   | 13  | 1    | 1        | 0            | 18    | 23                  | 8     | 8         |
| 15B West         | 2004 | 33  | 64  | 41   | 2        | 0            | 140   | 52                  | 64    | 3         |
| 15B West         | 2007 | 31  | 64  | 33   | 3        | 0            | 131   | 48                  | 52    | 5         |
| 15B West         | 2008 | 26  | 63  | 41   | 6        | 6            | 142   | 41                  | 65    | 10        |
| 15C North        | 2004 | 18  | 58  | 43   | 1        | 0            | 120   | 31                  | 74    | 2         |
| 15C North        | 2007 | 33  | 50  | 37   | 6        | 0            | 126   | 66                  | 74    | 12        |
| 15C North        | 2008 | 41  | 85  | 63   | 9        | 0            | 198   | 48                  | 74    | 11        |
| 15C South        | 2004 | 7   | 17  | 8    | 2        | 0            | 34    | 41                  | 47    | 12        |
| 15C South        | 2005 | 8   | 16  | 6    | 0        | 0            | 30    | 50                  | 38    | 0         |
| 15C South        | 2006 | 21  | 20  | 5    | 0        | 0            | 46    | 105                 | 25    | 0         |
| 15C South        | 2007 | 6   | 7   | 4    | 0        | 0            | 17    | 86                  | 57    | 0         |
| 15C South        | 2008 | 8   | 11  | 7    | 0        | 0            | 26    | 73                  | 64    | 0         |
| 15D              | 2004 | 29  | 87  | 25   | 2        | 1            | 144   | 33                  | 29    | 2         |
| 15D              | 2007 | 35  | 51  | 19   | 0        | 0            | 105   | 69                  | 37    | 0         |
| 15D              | 2008 | 88  | 110 | 40   | 1        | 0            | 239   | 80                  | 36    | 1         |
| 16A              | 2005 | 5   | 13  | 6    | 0        | 0            | 24    | 38                  | 46    | 0         |
| 16A              | 2008 | 7   | 23  | 2    | 4        | 0            | 36    | 30                  | 9     | 17        |
| 16B              | 2006 | 15  | 20  | 7    | 3        | 0            | 45    | 75                  | 35    | 15        |
| 22               | 2006 | 13  | 22  | 8    | 5        | 6            | 54    | 59                  | 36    | 23        |
| 23               | 2005 | 0   | 18  | 4    | 0        | 1            | 23    | 0                   | 22    | 0         |
| 23               | 2006 | 11  | 26  | 9    | 1        | 0            | 47    | 42                  | 35    | 4         |
| 24A              | 2005 | 2   | 1   | 1    | 0        | 0            | 4     | 200                 | 100   | 0         |
| 24B              | 2006 | 18  | 22  | 6    | 3        | 0            | 49    | 82                  | 27    | 14        |
| 28 (Peloncillos) | 2007 | 15  | 23  | 4    | 1        | 1            | 44    | 65                  | 17    | 4         |
| 31/32 (Aravaipa) | 2004 | 6   | 18  | 1    | 4        | 0            | 29    | 33                  | 6     | 22        |
| 31/32 (Aravaipa) | 2006 | 25  | 47  | 11   | 0        | 0            | 83    | 53                  | 23    | 0         |
| 32               | 2007 | 7   | 5   | 1    | 0        | 0            | 13    | 140                 | 20    | 0         |
| 37A              | 2004 | 12  | 25  | 5    | 6        | 0            | 48    | 48                  | 20    | 24        |
| 37A              | 2005 | 12  | 14  | 6    | 6        | 2            | 40    | 86                  | 43    | 43        |
| 37A              | 2006 | 14  | 17  | 5    | 2        | 0            | 38    | 82                  | 29    | 12        |
| 37A              | 2007 | 8   | 12  | 3    | 1        | 0            | 24    | 67                  | 25    | 8         |
| 37A              | 2008 | 12  | 20  | 6    | 1        | 0            | 39    | 60                  | 30    | 5         |
| 37B              | 2004 | 3   | 14  | 5    | 2        | 0            | 24    | 21                  | 36    | 14        |
| 37B              | 2005 | 2   | 6   | 3    | 1        | 0            | 12    | 33                  | 50    | 17        |
| 37B              | 2006 | 0   | 3   | 0    | 4        | 0            | 7     | 0                   | 0     | 133       |
| 37B              | 2008 | 5   | 6   | 0    | 0        | 0            | 11    | 83                  | 0     | 0         |
| 39 East          | 2006 | 8   | 11  | 4    | 0        | 0            | 23    | 73                  | 36    | 0         |
| 39 West          | 2006 | 14  | 29  | 4    | 3        | 0            | 50    | 48                  | 14    | 10        |
| 39 West          | 2008 | 12  | 24  | 3    | 1        | 0            | 40    | 50                  | 13    | 4         |
| 40A North        | 2004 | 5   | 3   | 3    | 1        | 0            | 12    | 167                 | 100   | 33        |
| 40A North        | 2007 | 0   | 1   | 1    | 0        | 0            | 2     | 0                   | 100   | 0         |
| 40A South        | 2004 | 5   | 5   | 2    | 0        | 0            | 12    | 100                 | 40    | 0         |
| 40A South        | 2007 | 4   | 7   | 1    | 2        | 0            | 14    | 57                  | 14    | 29        |
| 40B East         | 2006 | 8   | 8   | 1    | 0        | 0            | 17    | 100                 | 13    | 0         |
| 40B East         | 2008 | 1   | 4   | 4    | 2        | 0            | 11    | 25                  | 100   | 50        |
| 40B West         | 2004 | 11  | 10  | 6    | 1        | 0            | 28    | 110                 | 60    | 10        |
| 40B West         | 2006 | 40  | 47  | 17   | 5        | 2            | 111   | 85                  | 36    | 11        |
| 40B West         | 2007 | 13  | 15  | 2    | 2        | 1            | 33    | 87                  | 13    | 13        |

## Bighorn Survey Data

### 5-Year: 2004-2008 Desert Bighorn Sheep Survey Data (continued)

| Unit      | Year | Ram | Ewe | Lamb | Yearling | Unclassified | Total | Number per 100 Ewes |       |           |
|-----------|------|-----|-----|------|----------|--------------|-------|---------------------|-------|-----------|
|           |      |     |     |      |          |              |       | Rams                | Lambs | Yearlings |
| 41 East   | 2006 | 21  | 48  | 9    | 5        | 0            | 83    | 44                  | 19    | 10        |
| 41 West   | 2006 | 21  | 32  | 6    | 4        | 0            | 63    | 66                  | 19    | 13        |
| 42        | 2007 | 3   | 13  | 2    | 2        | 0            | 20    | 23                  | 15    | 15        |
| 42        | 2008 | 8   | 20  | 4    | 4        | 0            | 36    | 40                  | 20    | 20        |
| 43A       | 2004 | 9   | 12  | 3    | 2        | 0            | 26    | 75                  | 25    | 17        |
| 43A       | 2007 | 7   | 14  | 7    | 6        | 0            | 34    | 50                  | 50    | 43        |
| 43B       | 2004 | 42  | 86  | 19   | 15       | 0            | 162   | 49                  | 22    | 17        |
| 43B       | 2007 | 54  | 114 | 30   | 17       | 2            | 217   | 47                  | 26    | 15        |
| 44A East  | 2004 | 5   | 17  | 4    | 3        | 0            | 29    | 29                  | 24    | 18        |
| 44A East  | 2005 | 9   | 16  | 2    | 1        | 0            | 28    | 56                  | 13    | 6         |
| 44A East  | 2007 | 14  | 14  | 7    | 3        | 0            | 38    | 100                 | 50    | 21        |
| 44A East  | 2008 | 5   | 16  | 3    | 0        | 0            | 24    | 31                  | 19    | 0         |
| 44A West  | 2004 | 5   | 7   | 3    | 2        | 0            | 17    | 71                  | 43    | 29        |
| 44A West  | 2007 | 5   | 8   | 1    | 0        | 0            | 14    | 63                  | 13    | 0         |
| 44B North | 2005 | 26  | 38  | 12   | 7        | 0            | 83    | 68                  | 32    | 18        |
| 44B North | 2007 | 31  | 33  | 3    | 10       | 0            | 77    | 94                  | 9     | 30        |
| 44B South | 2005 | 11  | 26  | 7    | 1        | 0            | 45    | 42                  | 27    | 4         |
| 44B South | 2007 | 8   | 15  | 3    | 0        | 0            | 26    | 53                  | 20    | 0         |
| 45A       | 2006 | 33  | 51  | 14   | 4        | 0            | 102   | 65                  | 27    | 8         |
| 45A       | 2007 | 28  | 55  | 12   | 8        | 0            | 103   | 51                  | 22    | 15        |
| 45A       | 2008 | 20  | 50  | 14   | 8        | 0            | 92    | 40                  | 28    | 16        |
| 45B       | 2006 | 15  | 41  | 8    | 7        | 0            | 71    | 37                  | 20    | 17        |
| 45B       | 2007 | 20  | 37  | 13   | 7        | 0            | 77    | 54                  | 35    | 19        |
| 45B       | 2008 | 19  | 39  | 10   | 4        | 0            | 72    | 49                  | 26    | 10        |
| 45C       | 2006 | 29  | 35  | 11   | 7        | 0            | 82    | 83                  | 31    | 20        |
| 45C       | 2007 | 35  | 46  | 14   | 10       | 5            | 110   | 76                  | 30    | 22        |
| 45C       | 2008 | 27  | 43  | 15   | 11       | 0            | 96    | 63                  | 35    | 26        |
| 46A       | 2005 | 21  | 30  | 7    | 8        | 0            | 66    | 70                  | 23    | 27        |
| 46A       | 2008 | 15  | 25  | 11   | 5        | 0            | 56    | 60                  | 44    | 20        |
| 46B       | 2005 | 43  | 61  | 10   | 14       | 1            | 129   | 70                  | 16    | 23        |
| 46B       | 2008 | 57  | 99  | 15   | 28       | 1            | 200   | 58                  | 15    | 28        |

### 5-Year: 2004-2008 Rocky Mountain Bighorn Sheep Survey Data

| Unit                | Year | Ram | Ewe | Lamb | Yearling | Unclassified | Total | Number per 100 Ewes |       |           |
|---------------------|------|-----|-----|------|----------|--------------|-------|---------------------|-------|-----------|
|                     |      |     |     |      |          |              |       | Rams                | Lambs | Yearlings |
| 1                   | 2004 | 2   | 16  | 6    | 1        | 0            | 25    | 13                  | 38    | 6         |
| 1                   | 2005 | 3   | 21  | 4    | 5        | 0            | 33    | 14                  | 19    | 24        |
| 1/27 North          | 2006 | 3   | 10  | 6    | 2        | 0            | 21    | 30                  | 60    | 20        |
| 1/27 North          | 2007 | 5   | 0   | 0    | 0        | 0            | 5     | —                   | —     | —         |
| 1/27 North          | 2008 | 7   | 23  | 11   | 5        | 1            | 47    | 30                  | 48    | 22        |
| 6A (West Clear Crk) | 2008 | 9   | 22  | 12   | 0        | 0            | 43    | 41                  | 55    | 0         |
| 23/24A              | 2008 | 3   | 16  | 5    | 0        | 0            | 24    | 19                  | 31    | 0         |
| 27 (Bear Canyon)    | 2006 | 14  | 18  | 4    | 0        | 0            | 36    | 78                  | 22    | 0         |
| 27 (Bear Canyon)    | 2007 | 6   | 16  | 5    | 2        | 0            | 29    | 38                  | 31    | 13        |
| 27 (Bear Canyon)    | 2008 | 14  | 20  | 10   | 3        | 0            | 47    | 70                  | 50    | 15        |
| 27 North            | 2004 | 34  | 59  | 22   | 7        | 0            | 122   | 58                  | 37    | 12        |
| 27 North            | 2005 | 34  | 36  | 13   | 1        | 0            | 84    | 94                  | 36    | 3         |
| 27 North            | 2006 | 13  | 28  | 9    | 0        | 2            | 52    | 46                  | 32    | 0         |
| 27 North            | 2007 | 10  | 35  | 22   | 7        | 0            | 74    | 29                  | 63    | 20        |
| 27 North            | 2008 | 25  | 61  | 24   | 10       | 0            | 120   | 41                  | 39    | 16        |
| 27 South            | 2005 | 15  | 25  | 10   | 4        | 0            | 54    | 60                  | 40    | 16        |
| 27 South            | 2008 | 14  | 15  | 3    | 7        | 0            | 39    | 93                  | 20    | 47        |
| 27 South/28 North   | 2004 | 9   | 9   | 4    | 0        | 0            | 22    | 100                 | 44    | 0         |
| 27 South/28 North   | 2005 | 37  | 73  | 22   | 7        | 38           | 177   | 51                  | 30    | 10        |
| 27 South/28 North   | 2006 | 53  | 116 | 46   | 7        | 0            | 222   | 46                  | 40    | 6         |
| 27 South/28 North   | 2007 | 38  | 64  | 35   | 8        | 0            | 145   | 59                  | 55    | 13        |
| 27 South/28 North   | 2008 | 45  | 139 | 54   | 19       | 0            | 257   | 32                  | 39    | 14        |

# Bighorn Harvest Data

## *Historic Summary of Bighorn Sheep Hunts<sup>1</sup>*

| Year | Permits Authorized | 1st Choice Applicants | Permits Issued | Hunters | Hunter Days | Total Harvest | Percent Success |
|------|--------------------|-----------------------|----------------|---------|-------------|---------------|-----------------|
| 1953 | 37                 | —                     | 37             | 37      | 218         | 20            | 54.1            |
| 1954 | 20                 | —                     | 20             | 19      | 103         | 12            | 63.2            |
| 1955 | 20                 | —                     | 20             | 20      | 132         | 5             | 25.0            |
| 1956 | 20                 | —                     | 20             | 19      | 112         | 6             | 31.6            |
| 1957 | 20                 | —                     | 20             | 20      | 130         | 6             | 30.0            |
| 1958 | 40                 | —                     | 40             | 37      | —           | 18            | 48.6            |
| 1959 | 65                 | —                     | 65             | 62      | —           | 19            | 30.6            |
| 1960 | 80                 | —                     | 80             | 80      | —           | 24            | 30.0            |
| 1961 | 85                 | —                     | 85             | 84      | —           | 26            | 31.0            |
| 1962 | 90                 | —                     | 90             | 89      | —           | 27            | 30.3            |
| 1963 | 81                 | —                     | 81             | 79      | —           | 32            | 40.5            |
| 1964 | 78                 | —                     | 78             | 76      | —           | 25            | 32.9            |
| 1965 | 90                 | 573                   | 90             | 83      | —           | 42            | 50.6            |
| 1966 | 84                 | 601                   | 84             | 84      | —           | 35            | 41.7            |
| 1967 | 84                 | 888                   | 84             | 83      | —           | 31            | 37.3            |
| 1968 | 81                 | 1170                  | 81             | 77      | —           | 47            | 61.0            |
| 1969 | 86                 | 1376                  | 86             | 84      | —           | 42            | 50.0            |
| 1970 | 79                 | 1540                  | 79             | 76      | —           | 39            | 51.3            |
| 1971 | 82                 | 1658                  | 82             | 79      | —           | 29            | 36.7            |
| 1972 | 71                 | 1454                  | 71             | 71      | —           | 34            | 47.9            |
| 1973 | 65                 | 1397                  | 65             | 62      | —           | 37            | 59.7            |
| 1974 | 57                 | 1361                  | 57             | 55      | —           | 36            | 65.5            |
| 1975 | 54                 | 1203                  | 54             | 51      | 391         | 30            | 58.8            |
| 1976 | 55                 | 1461                  | 55             | 55      | 344         | 40            | 72.7            |
| 1977 | 51                 | 1630                  | 51             | 51      | 331         | 44            | 86.3            |
| 1978 | 52                 | 1842                  | 52             | 48      | 235         | 39            | 81.3            |
| 1979 | 52                 | 1937                  | 52             | 52      | 341         | 41            | 78.8            |
| 1980 | 50                 | 2230                  | 50             | 50      | 343         | 39            | 78.0            |
| 1981 | 45                 | 2635                  | 45             | 43      | 293         | 34            | 79.1            |
| 1982 | 42                 | 2585                  | 42             | 42      | 224         | 36            | 85.7            |
| 1983 | 48                 | 2159                  | 48             | 47      | 233         | 44            | 93.6            |
| 1984 | 55                 | 2259                  | 55             | 55      | 349         | 51            | 92.7            |
| 1985 | 56                 | 2461                  | 56             | 56      | 306         | 52            | 92.9            |
| 1986 | 65                 | 2699                  | 65             | 64      | 358         | 56            | 87.5            |
| 1987 | 72                 | 3065                  | 72             | 72      | 370         | 68            | 94.4            |
| 1988 | 78                 | 3281                  | 78             | 78      | 361         | 75            | 96.2            |
| 1989 | 82                 | 3693                  | 82             | 81      | 442         | 74            | 91.4            |
| 1990 | 78                 | 3734                  | 78             | 77      | 425         | 68            | 88.3            |
| 1991 | 85                 | 4174                  | 85             | 84      | 497         | 78            | 92.9            |
| 1992 | 82                 | 4407                  | 83             | 83      | 441         | 74            | 89.2            |
| 1993 | 99                 | 4946                  | 99             | 99      | 501         | 92            | 92.9            |
| 1994 | 112                | 5673                  | 112            | 109     | 580         | 100           | 91.7            |
| 1995 | 113                | 6256                  | 114            | 114     | 622         | 109           | 95.6            |
| 1996 | 108                | 6843                  | 108            | 108     | 754         | 100           | 92.6            |
| 1997 | 99                 | 7077                  | 99             | 99      | 721         | 92            | 92.9            |
| 1998 | 109                | 7790                  | 109            | 109     | 907         | 98            | 89.9            |
| 1999 | 111                | 8408                  | 111            | 110     | 745         | 104           | 94.5            |
| 2000 | 105                | 8471                  | 106            | 106     | 691         | 101           | 95.3            |
| 2001 | 105                | 8767                  | 105            | 104     | 748         | 96            | 92.3            |
| 2002 | 104                | 13013                 | 105            | 101     | 674         | 92            | 91.1            |
| 2003 | 99                 | 16049                 | 99             | 95      | 764         | 87            | 91.6            |
| 2004 | 84                 | 18927                 | 84             | 84      | 663         | 68            | 80.9            |
| 2005 | 82                 | 11266                 | 82             | 81      | 681         | 73            | 90.1            |
| 2006 | 96                 | 16332                 | 96             | 95      | 673         | 87            | 91.6            |
| 2007 | 99                 | 10930                 | 99             | 97      | 698         | 92            | 94.8            |
| 2008 | 93                 | 9017                  | 94             | 94      | 702         | 86            | 91.5            |

<sup>1</sup> Excluding Indian Reservation hunts; including raffle and auction tags.

# Bighorn Hunt Data

## 5-Year: 2004-2008 Harvest

| Unit                | Year | Dates       | Permits Authorized | 1st Choice Applicants | 2nd Choice Applicants | Permits Issued | Draw Odds | Hunters | Hunter Days | Harvest | Hunt Success |
|---------------------|------|-------------|--------------------|-----------------------|-----------------------|----------------|-----------|---------|-------------|---------|--------------|
| Auction             | 2004 | —           | 1                  | 0                     | 0                     | 0              | —         | 1       | 9           | 1       | 100          |
| Auction             | 2005 | —           | 1                  | 0                     | 0                     | 0              | —         | 1       | 3           | 1       | 100          |
| Auction (Desert)    | 2006 | —           | 1                  | 0                     | 0                     | 1              | —         | 1       | 16          | 1       | 100          |
| Auction (Rocky Mtn) | 2006 | —           | 1                  | 0                     | 0                     | 1              | —         | 1       | 14          | 1       | 100          |
| Auction (Desert)    | 2007 | —           | 1                  | 0                     | 0                     | 1              | —         | 1       | 12          | 1       | 100          |
| Auction (Rocky Mtn) | 2007 | —           | 1                  | 0                     | 0                     | 1              | —         | 1       | 8           | 1       | 100          |
| Auction (Desert)    | 2008 | —           | 1                  | 0                     | 0                     | 1              | —         | 1       | 3           | 1       | 100          |
| Auction (Rocky Mtn) | 2008 | —           | 1                  | 0                     | 0                     | 1              | —         | 1       | 30          | 1       | 100          |
| Raffle              | 2004 | —           | 1                  | 0                     | 0                     | 0              | —         | 1       | 4           | 1       | 100          |
| Raffle              | 2005 | —           | 1                  | 0                     | 0                     | 0              | —         | 1       | 21          | 1       | 100          |
| Raffle              | 2006 | —           | 1                  | 0                     | 0                     | 1              | —         | 1       | 7           | 1       | 100          |
| Raffle              | 2007 | —           | 1                  | 0                     | 0                     | 1              | —         | 1       | 7           | 1       | 100          |
| Raffle              | 2008 | —           | 1                  | 0                     | 0                     | 1              | —         | 1       | 6           | 1       | 100          |
| 1/27N Black River   | 2004 | 11/01-11/30 | 1                  | 746                   | 365                   | 1              | 0.1       | 1       | 6           | 1       | 100          |
| 1/27N Black River   | 2005 | 11/01-11/30 | 1                  | 404                   | 262                   | 1              | 0.2       | 1       | 4           | 1       | 100          |
| 1/27N Black River   | 2006 | 11/01-11/30 | 1                  | 448                   | 320                   | 1              | 0.2       | 1       | 10          | 1       | 100          |
| 1/27N Black River   | 2007 | 11/01-11/30 | 1                  | 240                   | 154                   | 1              | 0.0       | 1       | 16          | 1       | 100          |
| 1/27N Black River   | 2008 | 11/01-11/30 | 1                  | 202                   | 137                   | 1              | 0.5       | 1       | 7           | 1       | 100          |
| 9/10                | 2005 | 10/01-12/31 | 1                  | 71                    | 23                    | 1              | 1.4       | 0       | 0           | 0       | —            |
| 9/10                | 2006 | 10/01-12/31 | 1                  | 159                   | 45                    | 1              | 0.6       | 1       | 10          | 1       | 100          |
| 9/10                | 2007 | 10/01-12/31 | 1                  | 54                    | 25                    | 1              | 0.0       | 1       | 14          | 0       | 0            |
| 9/10                | 2008 | 10/01-12/31 | 1                  | 41                    | 18                    | 1              | 2.4       | 1       | 15          | 0       | 0            |
| 10                  | 2004 | 10/01-12/31 | 1                  | 331                   | 113                   | 1              | 0.3       | 1       | 14          | 0       | 0            |
| 12A/12B West        | 2005 | 12/01-12/31 | 2                  | 142                   | 276                   | 2              | 0.7       | 2       | 34          | 2       | 100          |
| 12A/12B West        | 2006 | 12/01-12/31 | 2                  | 177                   | 163                   | 2              | 1.1       | 2       | 38          | 1       | 50           |
| 12A/12B West        | 2007 | 12/01-12/31 | 3                  | 134                   | 235                   | 3              | 0.7       | 3       | 29          | 1       | 33           |
| 12A/12B West        | 2008 | 12/01-12/31 | 2                  | 53                    | 49                    | 2              | 3.8       | 2       | 4           | 2       | 100          |
| 12A/12BW/13A        | 2004 | 12/01-12/31 | 2                  | 289                   | 383                   | 2              | 0.3       | 2       | 24          | 1       | 50           |
| 12B East            | 2004 | 12/01-12/31 | 2                  | 509                   | 371                   | 2              | 0.4       | 2       | 6           | 2       | 100          |
| 12B East            | 2005 | 12/01-12/31 | 2                  | 211                   | 93                    | 2              | 0.5       | 2       | 10          | 2       | 100          |
| 12B East            | 2006 | 12/01-12/31 | 1                  | 126                   | 97                    | 1              | 0.0       | 1       | 7           | 1       | 100          |
| 12B East            | 2007 | 12/01-12/31 | 1                  | 71                    | 53                    | 1              | 0.0       | 1       | 7           | 1       | 100          |
| 12B East            | 2008 | 12/01-12/31 | 1                  | 44                    | 30                    | 1              | 2.3       | 1       | 19          | 1       | 100          |
| 13A                 | 2004 | 12/01-12/31 | 2                  | 402                   | 352                   | 2              | 0.2       | 2       | 28          | 2       | 100          |
| 13A                 | 2005 | 12/01-12/31 | 2                  | 290                   | 376                   | 2              | 0.0       | 2       | 60          | 2       | 100          |
| 13A                 | 2006 | 12/01-12/31 | 3                  | 678                   | 502                   | 3              | 0.3       | 3       | 9           | 3       | 100          |
| 13A                 | 2007 | 12/01-12/31 | 5                  | 506                   | 450                   | 5              | 0.6       | 5       | 33          | 5       | 100          |
| 13A                 | 2008 | 12/01-12/31 | 3                  | 256                   | 248                   | 3              | 0.4       | 3       | 21          | 3       | 100          |
| 13B North           | 2004 | 12/01-12/31 | 3                  | 697                   | 412                   | 3              | 0.4       | 3       | 8           | 3       | 100          |
| 13B North           | 2005 | 12/01-12/31 | 4                  | 602                   | 515                   | 4              | 0.5       | 4       | 78          | 3       | 75           |
| 13B North           | 2006 | 12/01-12/31 | 6                  | 1907                  | 1541                  | 6              | 0.3       | 6       | 32          | 6       | 100          |
| 13B North           | 2007 | 12/01-12/31 | 5                  | 1030                  | 578                   | 5              | 0.4       | 5       | 40          | 5       | 100          |
| 13B North           | 2008 | 12/01-12/31 | 4                  | 722                   | 340                   | 4              | 0.6       | 4       | 12          | 4       | 100          |
| 13B South           | 2004 | 12/01-12/31 | 1                  | 79                    | 127                   | 1              | 0.0       | 1       | 7           | 1       | 100          |
| 13B South           | 2005 | 12/01-12/31 | 1                  | 24                    | 49                    | 1              | 0.0       | 1       | 17          | 1       | 100          |
| 13B South           | 2006 | 12/01-12/31 | 1                  | 50                    | 106                   | 1              | 2.0       | 1       | 10          | 0       | 0            |
| 13B South           | 2007 | 12/01-12/31 | 1                  | 24                    | 56                    | 1              | 4.2       | 1       | 7           | 0       | 0            |
| 13B South           | 2008 | 12/01-12/31 | 1                  | 17                    | 29                    | 1              | 5.9       | 1       | 14          | 0       | 0            |
| 15A/15B East        | 2004 | 12/01-12/31 | 2                  | 197                   | 165                   | 2              | 0.5       | 2       | 16          | 2       | 100          |
| 15A/15B East        | 2005 | 12/01-12/31 | 1                  | 52                    | 55                    | 1              | 0.0       | 1       | 7           | 1       | 100          |
| 15A/15B East        | 2006 | 12/01-12/31 | 1                  | 94                    | 81                    | 1              | 1.1       | 1       | 4           | 1       | 100          |
| 15A/15B East        | 2007 | 12/01-12/31 | 1                  | 32                    | 56                    | 1              | 3.1       | 1       | 7           | 1       | 100          |
| 15A/15B East        | 2008 | 12/01-12/31 | 1                  | 24                    | 29                    | 1              | 4.2       | 1       | 2           | 1       | 100          |
| 15B West            | 2004 | 12/01-12/31 | 4                  | 994                   | 853                   | 4              | 0.2       | 4       | 26          | 3       | 75           |
| 15B West            | 2005 | 12/01-12/31 | 4                  | 426                   | 419                   | 4              | 0.9       | 4       | 12          | 4       | 100          |
| 15B West            | 2006 | 12/01-12/31 | 3                  | 385                   | 532                   | 3              | 0.8       | 3       | 21          | 3       | 100          |
| 15B West            | 2007 | 12/01-12/31 | 3                  | 218                   | 211                   | 3              | 0.9       | 3       | 11          | 3       | 100          |
| 15B West            | 2008 | 12/01-12/31 | 3                  | 190                   | 178                   | 3              | 1.6       | 3       | 19          | 3       | 100          |
| 15C North           | 2004 | 12/01-12/31 | 3                  | 490                   | 660                   | 3              | 0.6       | 3       | 12          | 3       | 100          |
| 15C North           | 2005 | 12/01-12/31 | 2                  | 213                   | 267                   | 2              | 0.9       | 2       | 19          | 2       | 100          |
| 15C North           | 2006 | 12/01-12/31 | 2                  | 240                   | 314                   | 2              | 0.4       | 2       | 8           | 2       | 100          |
| 15C North           | 2007 | 12/01-12/31 | 2                  | 100                   | 146                   | 2              | 1.0       | 2       | 9           | 2       | 100          |
| 15C North           | 2008 | 12/01-12/31 | 3                  | 162                   | 219                   | 3              | 0.6       | 3       | 20          | 3       | 100          |
| 15C South           | 2004 | 12/01-12/31 | 1                  | 115                   | 246                   | 1              | 0.0       | 1       | 11          | 1       | 100          |

# Bighorn Hunt Data

5-Year: 2004-2008 Harvest (continued)

| Unit            | Year | Dates       | Permits Authorized | 1st Choice Applicants | 2nd Choice Applicants | Permits Issued | Draw Odds | Hunters | Hunter Days | Harvest | Hunt Success |
|-----------------|------|-------------|--------------------|-----------------------|-----------------------|----------------|-----------|---------|-------------|---------|--------------|
| 15C South       | 2005 | 12/01-12/31 | 1                  | 60                    | 152                   | 1              | 0.0       | 1       | 1           | 1       | 100          |
| 15C South       | 2006 | 12/01-12/31 | 1                  | 79                    | 172                   | 1              | 1.3       | 1       | 18          | 0       | 0            |
| 15C South       | 2007 | 12/01-12/31 | 1                  | 21                    | 84                    | 1              | 0.0       | 1       | 3           | 1       | 100          |
| 15C South       | 2008 | 12/01-12/31 | 1                  | 16                    | 48                    | 1              | 6.3       | 1       | 9           | 1       | 100          |
| 15D             | 2004 | 12/01-12/31 | 5                  | 1591                  | 860                   | 5              | 0.3       | 5       | 22          | 5       | 100          |
| 15D             | 2005 | 12/01-12/31 | 5                  | 775                   | 641                   | 5              | 0.6       | 5       | 24          | 5       | 100          |
| 15D             | 2006 | 12/01-12/31 | 7                  | 1277                  | 881                   | 7              | 0.4       | 7       | 61          | 7       | 100          |
| 15D             | 2007 | 12/01-12/31 | 5                  | 646                   | 352                   | 5              | 0.6       | 5       | 23          | 5       | 100          |
| 15D             | 2008 | 12/01-12/31 | 3                  | 263                   | 222                   | 3              | 0.8       | 3       | 29          | 3       | 100          |
| 16A             | 2004 | 12/01-12/31 | 3                  | 158                   | 234                   | 3              | 0.6       | 3       | 18          | 3       | 100          |
| 16A             | 2005 | 12/01-12/31 | 2                  | 102                   | 99                    | 2              | 2.0       | 2       | 3           | 2       | 100          |
| 16A             | 2006 | 12/01-12/31 | 1                  | 79                    | 72                    | 1              | 1.3       | 1       | 4           | 1       | 100          |
| 16A             | 2007 | 12/01-12/31 | 1                  | 37                    | 41                    | 1              | 2.7       | 1       | 21          | 1       | 100          |
| 16A             | 2008 | 12/01-12/31 | 1                  | 25                    | 38                    | 1              | 0.0       | 1       | 20          | 1       | 100          |
| 16B             | 2004 | 12/01-12/31 | 1                  | 82                    | 66                    | 1              | 1.2       | 1       | 1           | 1       | 100          |
| 16B             | 2005 | 12/01-12/31 | 1                  | 46                    | 52                    | 1              | 2.2       | 1       | 9           | 1       | 100          |
| 16B             | 2006 | 12/01-12/31 | 1                  | 71                    | 77                    | 1              | 1.4       | 1       | 1           | 1       | 100          |
| 16B             | 2007 | 12/01-12/31 | 2                  | 89                    | 112                   | 2              | 1.1       | 2       | 7           | 2       | 100          |
| 16B             | 2008 | 12/01-12/31 | 2                  | 112                   | 116                   | 2              | 0.0       | 2       | 5           | 2       | 100          |
| 22              | 2004 | 12/01-12/31 | 1                  | 674                   | 345                   | 1              | 0.1       | 1       | 30          | 1       | 100          |
| 22              | 2005 | 12/01-12/31 | 1                  | 401                   | 239                   | 1              | 0.0       | 1       | 2           | 1       | 100          |
| 22              | 2006 | 12/01-12/31 | 1                  | 489                   | 306                   | 1              | 0.0       | 1       | 3           | 1       | 100          |
| 22              | 2007 | 12/01-12/31 | 1                  | 267                   | 140                   | 1              | 0.0       | 1       | 5           | 1       | 100          |
| 22              | 2008 | 12/01-12/31 | 1                  | 261                   | 130                   | 1              | 0.4       | 1       | 3           | 1       | 100          |
| 23/24A          | 2006 | 12/01-12/31 | 1                  | 388                   | 197                   | 1              | 0.3       | 1       | 21          | 1       | 100          |
| 23/24A          | 2007 | 12/01-12/31 | 1                  | 181                   | 104                   | 1              | 0.6       | 1       | 28          | 0       | 0            |
| 23/24A          | 2008 | 12/01-12/31 | 1                  | 143                   | 68                    | 1              | 0.7       | 1       | 29          | 0       | 0            |
| 24B             | 2004 | 12/01-12/31 | 1                  | 406                   | 339                   | 1              | 0.2       | 1       | 6           | 1       | 100          |
| 24B             | 2005 | 12/01-12/31 | 1                  | 304                   | 245                   | 1              | 0.3       | 1       | 11          | 1       | 100          |
| 24B             | 2006 | 12/01-12/31 | 1                  | 372                   | 286                   | 1              | 0.3       | 1       | 7           | 1       | 100          |
| 24B North       | 2007 | 12/01-12/31 | 1                  | 120                   | 138                   | 1              | 0.8       | 1       | 6           | 1       | 100          |
| 24B North       | 2008 | 12/01-12/31 | 1                  | 138                   | 169                   | 1              | 0.0       | 1       | 2           | 1       | 100          |
| 24B South       | 2007 | 12/01-12/31 | 1                  | 149                   | 121                   | 1              | 0.7       | 1       | 4           | 1       | 100          |
| 24B South       | 2008 | 12/01-12/31 | 1                  | 136                   | 128                   | 1              | 0.7       | 1       | 8           | 1       | 100          |
| 27 Bear Canyon  | 2006 | 12/01-12/31 | 1                  | 106                   | 189                   | 1              | 0.9       | 0       | 0           | 0       | —            |
| 27 Bear Canyon  | 2007 | 12/01-12/31 | 1                  | 83                    | 106                   | 1              | 0.0       | 1       | 6           | 1       | 100          |
| 27 Bear Canyon  | 2008 | 12/01-12/31 | 1                  | 71                    | 100                   | 1              | 0.0       | 1       | 5           | 1       | 100          |
| 27N Foote Creek | 2004 | 12/01-12/31 | 3                  | 1383                  | 634                   | 3              | 0.2       | 3       | 6           | 3       | 100          |
| 27N Foote Creek | 2005 | 12/01-12/31 | 4                  | 1075                  | 609                   | 4              | 0.4       | 4       | 13          | 4       | 100          |
| 27N Foote Creek | 2006 | 12/01-12/31 | 5                  | 1308                  | 673                   | 5              | 0.3       | 5       | 31          | 3       | 60           |
| 27N Foote Creek | 2007 | 12/01-12/31 | 5                  | 788                   | 468                   | 5              | 0.4       | 5       | 20          | 5       | 100          |
| 27N Foote Creek | 2008 | 12/01-12/31 | 3                  | 618                   | 379                   | 3              | 0.5       | 3       | 14          | 3       | 100          |
| 27S/28N (early) | 2004 | 12/01-12/15 | 2                  | 838                   | 1003                  | 2              | 0.1       | 2       | 11          | 2       | 100          |
| 27S/28N (early) | 2005 | 12/01-12/15 | 2                  | 275                   | 379                   | 2              | 0.4       | 2       | 9           | 2       | 100          |
| 27S/28N (early) | 2006 | 12/01-12/15 | 3                  | 693                   | 807                   | 3              | 0.3       | 3       | 13          | 3       | 100          |
| 27S/28N (early) | 2007 | 12/01-12/15 | 3                  | 504                   | 611                   | 3              | 0.6       | 3       | 8           | 3       | 100          |
| 27S/28N (early) | 2008 | 12/01-12/15 | 3                  | 520                   | 522                   | 3              | 0.2       | 3       | 9           | 3       | 100          |
| 27S/28N (late)  | 2004 | 12/16-12/31 | 2                  | 314                   | 1050                  | 2              | 0.3       | 2       | 23          | 2       | 100          |
| 27S/28N (late)  | 2005 | 12/16-12/31 | 2                  | 334                   | 791                   | 2              | 0.3       | 2       | 10          | 2       | 100          |
| 27S/28N (late)  | 2006 | 12/16-12/31 | 3                  | 197                   | 965                   | 3              | 0.0       | 3       | 5           | 3       | 100          |
| 27S/28N (late)  | 2007 | 12/16-12/31 | 3                  | 226                   | 749                   | 3              | 0.4       | 3       | 3           | 3       | 100          |
| 27S/28N (late)  | 2008 | 12/16-12/31 | 3                  | 189                   | 677                   | 3              | 0.0       | 3       | 16          | 3       | 100          |
| 28              | 2008 | 12/01-12/31 | 1                  | 118                   | 83                    | 1              | 0.8       | 1       | 9           | 1       | 100          |
| 31/32           | 2004 | 12/01-12/31 | 1                  | 958                   | 238                   | 1              | 0.1       | 1       | 2           | 1       | 100          |
| 31/32           | 2005 | 12/01-12/31 | 1                  | 566                   | 178                   | 1              | 0.2       | 1       | 22          | 1       | 100          |
| 31/32           | 2006 | 12/01-12/31 | 1                  | 694                   | 283                   | 1              | 0.1       | 1       | 3           | 1       | 100          |
| 31/32           | 2007 | 12/01-12/31 | 2                  | 1169                  | 312                   | 2              | 0.2       | 2       | 26          | 2       | 100          |
| 31/32           | 2008 | 12/01-12/31 | 2                  | 999                   | 239                   | 2              | 0.2       | 2       | 6           | 2       | 100          |
| 37A             | 2006 | 12/01-12/31 | 1                  | 234                   | 116                   | 1              | 0.4       | 1       | 7           | 1       | 100          |
| 37A             | 2007 | 12/01-12/31 | 2                  | 811                   | 563                   | 2              | 0.0       | 2       | 13          | 2       | 100          |
| 37A             | 2008 | 12/01-12/31 | 2                  | 317                   | 356                   | 2              | 0.6       | 2       | 3           | 2       | 100          |
| 39 East         | 2004 | 12/01-12/31 | 1                  | 120                   | 116                   | 1              | 0.0       | 1       | 21          | 0       | 0            |
| 39 East         | 2005 | 12/01-12/31 | 1                  | 69                    | 85                    | 1              | 0.0       | 1       | 24          | 0       | 0            |
| 39 East         | 2006 | 12/01-12/31 | 1                  | 78                    | 77                    | 1              | 0.0       | 1       | 9           | 1       | 100          |

# Bighorn Hunt Data

5-Year: 2004-2008 Harvest (continued)

| Unit               | Year | Dates       | Permits Authorized | 1st Choice Applicants | 2nd Choice Applicants | Permits Issued | Draw Odds | Hunters | Hunter Days | Harvest | Hunt Success |
|--------------------|------|-------------|--------------------|-----------------------|-----------------------|----------------|-----------|---------|-------------|---------|--------------|
| 39 West            | 2004 | 12/01-12/31 | 2                  | 322                   | 317                   | 2              | 0.3       | 2       | 8           | 2       | 100          |
| 39 West            | 2005 | 12/01-12/31 | 2                  | 235                   | 190                   | 2              | 0.4       | 2       | 12          | 2       | 100          |
| 39 West            | 2006 | 12/01-12/31 | 2                  | 293                   | 774                   | 2              | 0.0       | 2       | 6           | 2       | 100          |
| 39 West            | 2007 | 12/01-12/31 | 2                  | 189                   | 195                   | 2              | 0.5       | 2       | 9           | 2       | 100          |
| 39 West            | 2008 | 12/01-12/31 | 2                  | 184                   | 215                   | 2              | 0.0       | 2       | 24          | 2       | 100          |
| 40A North          | 2004 | 12/01-12/31 | 1                  | 57                    | 64                    | 1              | 0.0       | 1       | 19          | 1       | 100          |
| 40A South          | 2004 | 12/01-12/31 | 1                  | 71                    | 53                    | 1              | 1.4       | 1       | 7           | 1       | 100          |
| 40A                | 2005 | 12/01-12/31 | 1                  | 68                    | 49                    | 1              | 1.5       | 1       | 17          | 0       | 0            |
| 40A                | 2006 | 12/01-12/31 | 1                  | 53                    | 44                    | 1              | 1.9       | 1       | 3           | 1       | 100          |
| 40A                | 2007 | 12/01-12/31 | 1                  | 68                    | 53                    | 1              | 1.5       | 1       | 19          | 1       | 100          |
| 40BW Gila Mts      | 2004 | 12/01-12/31 | 2                  | 86                    | 96                    | 2              | 1.2       | 2       | 42          | 1       | 50           |
| 40BW Gila Mts      | 2005 | 12/01-12/31 | 2                  | 43                    | 125                   | 2              | 2.3       | 2       | 36          | 1       | 50           |
| 40BW Gila Mts      | 2006 | 12/01-12/31 | 2                  | 60                    | 110                   | 2              | 0.0       | 2       | 5           | 2       | 100          |
| 40BW Gila Mts      | 2007 | 12/01-12/31 | 3                  | 66                    | 178                   | 3              | 1.5       | 3       | 27          | 3       | 100          |
| 40BW Gila Mts      | 2008 | 12/01-12/31 | 3                  | 207                   | 188                   | 3              | 1.0       | 3       | 26          | 2       | 67           |
| 40BW Mohawk/Copper | 2004 | 12/01-12/31 | 2                  | 266                   | 353                   | 2              | 0.4       | 2       | 8           | 2       | 100          |
| 40BW Mohawk/Copper | 2005 | 12/01-12/31 | 1                  | 0                     | 1                     | 1              | —         | 1       | 1           | 1       | 100          |
| 40BW Mohawk/Copper | 2006 | 12/01-12/31 | 2                  | 69                    | 113                   | 2              | 1.4       | 2       | 7           | 2       | 100          |
| 40BW Mohawk/Copper | 2007 | 12/01-12/31 | 2                  | 118                   | 231                   | 2              | 0.8       | 2       | 33          | 1       | 50           |
| 40BW Mohawk/Copper | 2008 | 12/01-12/31 | 3                  | 106                   | 285                   | 3              | 1.9       | 3       | 58          | 1       | 33           |
| 40BW Tinajas Altas | 2004 | 12/01-12/31 | 1                  | 95                    | 83                    | 1              | 1.1       | 1       | 11          | 0       | 0            |
| 40BW Tinajas Altas | 2005 | 12/01-12/31 | 1                  | 43                    | 43                    | 1              | 2.3       | 1       | 9           | 1       | 100          |
| 40BW Tinajas Altas | 2006 | 12/01-12/31 | 1                  | 41                    | 40                    | 1              | 0.0       | 1       | 4           | 1       | 100          |
| 40BW Tinajas Altas | 2007 | 12/01-12/31 | 1                  | 19                    | 42                    | 1              | 5.3       | 1       | 13          | 1       | 100          |
| 40BW Tinajas Altas | 2008 | 12/01-12/31 | 1                  | 26                    | 24                    | 1              | 3.8       | 1       | 2           | 1       | 100          |
| 41 East            | 2004 | 12/01-12/31 | 3                  | 2272                  | 456                   | 3              | 0.1       | 3       | 27          | 3       | 100          |
| 41 East            | 2005 | 12/01-12/31 | 3                  | 1277                  | 340                   | 3              | 0.2       | 3       | 37          | 3       | 100          |
| 41 East            | 2006 | 12/01-12/31 | 4                  | 969                   | 497                   | 4              | 0.2       | 4       | 25          | 4       | 100          |
| 41 East            | 2007 | 12/01-12/31 | 2                  | 328                   | 426                   | 2              | 0.6       | 2       | 34          | 2       | 100          |
| 41 East            | 2008 | 12/01-12/31 | 3                  | 359                   | 296                   | 3              | 0.6       | 3       | 12          | 3       | 100          |
| 41 West            | 2004 | 12/01-12/31 | 2                  | 199                   | 350                   | 2              | 1.0       | 2       | 4           | 2       | 100          |
| 41 West            | 2005 | 12/01-12/31 | 2                  | 186                   | 262                   | 2              | 0.5       | 2       | 3           | 2       | 100          |
| 41 West            | 2006 | 12/01-12/31 | 2                  | 325                   | 432                   | 2              | 0.3       | 2       | 11          | 2       | 100          |
| 41 West            | 2007 | 12/01-12/31 | 3                  | 337                   | 383                   | 3              | 0.3       | 3       | 52          | 2       | 67           |
| 41 West            | 2008 | 12/01-12/31 | 3                  | 287                   | 301                   | 3              | 0.3       | 3       | 19          | 3       | 100          |
| 43A                | 2004 | 12/01-12/31 | 1                  | 127                   | 76                    | 1              | 0.8       | 1       | 1           | 0       | 0            |
| 43A                | 2005 | 12/01-12/31 | 1                  | 55                    | 34                    | 1              | 1.8       | 1       | 4           | 1       | 100          |
| 43A                | 2006 | 12/01-12/31 | 1                  | 62                    | 68                    | 1              | 0.0       | 1       | 5           | 1       | 100          |
| 43A                | 2007 | 12/01-12/31 | 1                  | 28                    | 31                    | 1              | 0.0       | 1       | 2           | 1       | 100          |
| 43A                | 2008 | 12/01-12/31 | 1                  | 27                    | 44                    | 1              | 0.0       | 1       | 3           | 1       | 100          |
| 43B                | 2004 | 12/01-12/31 | 3                  | 330                   | 317                   | 3              | 0.9       | 3       | 36          | 3       | 100          |
| 43B                | 2005 | 12/01-12/31 | 4                  | 377                   | 321                   | 4              | 0.8       | 4       | 11          | 4       | 100          |
| 43B                | 2006 | 12/01-12/31 | 5                  | 486                   | 610                   | 5              | 0.6       | 5       | 38          | 5       | 100          |
| 43B                | 2007 | 12/01-12/31 | 5                  | 536                   | 384                   | 5              | 0.9       | 5       | 16          | 5       | 100          |
| 43B                | 2008 | 12/01-12/31 | 5                  | 335                   | 343                   | 5              | 1.5       | 5       | 32          | 5       | 100          |
| 44A West           | 2004 | 12/01-12/31 | 1                  | 78                    | 65                    | 1              | 1.3       | 1       | 12          | 1       | 100          |
| 44A West           | 2005 | 12/01-12/31 | 1                  | 93                    | 65                    | 1              | 0.0       | 1       | 3           | 1       | 100          |
| 44A West           | 2006 | 12/01-12/31 | 1                  | 92                    | 77                    | 1              | 1.1       | 1       | 3           | 1       | 100          |
| 44A East           | 2007 | 12/01-12/31 | 1                  | 63                    | 72                    | 1              | 0.0       | 1       | 9           | 1       | 100          |
| 44A East           | 2008 | 12/01-12/31 | 1                  | 37                    | 40                    | 1              | 2.7       | 1       | 14          | 1       | 100          |
| 44A West           | 2007 | 12/01-12/31 | 1                  | 52                    | 45                    | 1              | 1.9       | 1       | 5           | 1       | 100          |
| 44A West           | 2008 | 12/01-12/31 | 1                  | 22                    | 38                    | 1              | 4.5       | 1       | 8           | 1       | 100          |
| 44B North          | 2004 | 12/01-12/31 | 2                  | 353                   | 975                   | 2              | 0.3       | 2       | 2           | 1       | 50           |
| 44B North          | 2005 | 12/01-12/31 | 2                  | 498                   | 694                   | 2              | 0.4       | 2       | 4           | 2       | 100          |
| 44B North          | 2006 | 12/01-12/31 | 2                  | 385                   | 316                   | 2              | 0.5       | 2       | 3           | 2       | 100          |
| 44B North          | 2007 | 12/01-12/31 | 2                  | 242                   | 168                   | 2              | 0.8       | 2       | 9           | 2       | 100          |
| 44B North          | 2008 | 12/01-12/31 | 3                  | 548                   | 430                   | 3              | 0.5       | 3       | 15          | 3       | 100          |
| 44B South          | 2004 | 12/01-12/31 | 2                  | 303                   | 436                   | 2              | 0.7       | 2       | 3           | 2       | 100          |
| 44B South          | 2005 | 12/01-12/31 | 2                  | 213                   | 480                   | 2              | 0.5       | 2       | 14          | 2       | 100          |
| 44B South          | 2006 | 12/01-12/31 | 2                  | 1234                  | 543                   | 2              | 0.2       | 2       | 28          | 1       | 50           |

## Bighorn Hunt Data

*5-Year: 2004-2008 Harvest (continued)*

| Unit      | Year | Dates       | Permits Authorized | 1st Choice Applicants | 2nd Choice Applicants | Permits Issued | Draw Odds | Hunters | Hunter Days | Harvest | Hunt Success |
|-----------|------|-------------|--------------------|-----------------------|-----------------------|----------------|-----------|---------|-------------|---------|--------------|
| 44B South | 2007 | 12/01-12/31 | 2                  | 101                   | 177                   | 2              | 1.0       | 2       | 7           | 2       | 100          |
| 44B South | 2008 | 12/01-12/31 | 1                  | 56                    | 87                    | 1              | 0.0       | 1       | 10          | 1       | 100          |
| 45A       | 2004 | 12/01-12/31 | 4                  | 920                   | 1119                  | 4              | 0.3       | 4       | 23          | 2       | 50           |
| 45A       | 2005 | 12/01-12/31 | 4                  | 417                   | 459                   | 4              | 1.0       | 4       | 26          | 3       | 75           |
| 45A       | 2006 | 12/01-12/31 | 4                  | 678                   | 571                   | 4              | 0.4       | 4       | 29          | 4       | 100          |
| 45A       | 2007 | 12/01-12/31 | 5                  | 580                   | 485                   | 5              | 0.7       | 5       | 34          | 5       | 100          |
| 45A       | 2008 | 12/01-12/31 | 3                  | 174                   | 253                   | 3              | 1.7       | 3       | 26          | 3       | 100          |
| 45B       | 2004 | 12/01-12/31 | 2                  | 196                   | 403                   | 2              | 0.5       | 2       | 39          | 0       | 0            |
| 45B       | 2005 | 12/01-12/31 | 2                  | 89                    | 315                   | 2              | 0.0       | 2       | 5           | 2       | 100          |
| 45B       | 2006 | 12/01-12/31 | 2                  | 110                   | 297                   | 2              | 0.9       | 2       | 2           | 2       | 100          |
| 45B       | 2007 | 12/01-12/31 | 1                  | 34                    | 99                    | 1              | 2.9       | 1       | 3           | 1       | 100          |
| 45B       | 2008 | 12/01-12/31 | 2                  | 110                   | 281                   | 2              | 0.0       | 2       | 11          | 2       | 100          |
| 45C       | 2004 | 12/01-12/31 | 5                  | 1473                  | 1282                  | 5              | 0.3       | 5       | 47          | 4       | 80           |
| 45C       | 2005 | 12/01-12/31 | 5                  | 938                   | 705                   | 5              | 0.5       | 5       | 61          | 5       | 100          |
| 45C       | 2006 | 12/01-12/31 | 5                  | 693                   | 635                   | 5              | 0.6       | 5       | 64          | 4       | 80           |
| 45C       | 2007 | 12/01-12/31 | 4                  | 291                   | 505                   | 4              | 0.3       | 4       | 46          | 4       | 100          |
| 45C       | 2008 | 12/01-12/31 | 4                  | 527                   | 495                   | 4              | 0.8       | 4       | 23          | 4       | 100          |
| 46A       | 2004 | 12/01-12/31 | 2                  | 113                   | 176                   | 2              | 0.0       | 2       | 22          | 1       | 50           |
| 46A       | 2005 | 12/01-12/31 | 2                  | 62                    | 70                    | 2              | 1.6       | 2       | 14          | 2       | 100          |
| 46A       | 2006 | 12/01-12/31 | 2                  | 113                   | 185                   | 2              | 1.8       | 2       | 25          | 1       | 50           |
| 46A       | 2007 | 12/01-12/31 | 2                  | 55                    | 107                   | 2              | 1.8       | 2       | 6           | 2       | 100          |
| 46A       | 2008 | 12/01-12/31 | 2                  | 146                   | 179                   | 2              | 1.4       | 3       | 33          | 2       | 67           |
| 46B       | 2004 | 12/01-12/31 | 4                  | 293                   | 376                   | 4              | 1.0       | 4       | 41          | 2       | 50           |
| 46B       | 2005 | 12/01-12/31 | 4                  | 230                   | 285                   | 4              | 1.3       | 4       | 31          | 2       | 50           |
| 46B       | 2006 | 12/01-12/31 | 6                  | 340                   | 426                   | 6              | 1.5       | 6       | 46          | 6       | 100          |
| 46B       | 2007 | 12/01-12/31 | 6                  | 323                   | 274                   | 6              | 1.5       | 6       | 29          | 6       | 100          |
| 46B       | 2008 | 12/01-12/31 | 6                  | 229                   | 299                   | 6              | 1.3       | 6       | 47          | 5       | 83           |



# Bighorn Hunt Data

## Successful Hunters and the Measurements of their Bighorn Sheep - 2008 Season

| Hunt Number | Unit     | Curl (Inches) |        | Base (Inches) |        | Spread | Age  | Arizona Score | Green Score |
|-------------|----------|---------------|--------|---------------|--------|--------|------|---------------|-------------|
|             |          | Left          | Right  | Left          | Right  |        |      |               |             |
| Special Tag | 15D      | 32            | 32-6/8 | 14-1/8        | 14-4/8 | 23-5/8 | 5.0  | 93-3/8        | 152-6/8     |
| Special Tag | 27       | 36-7/8        | 34-4/8 | 13-3/8        | 13-3/8 | 20-1/8 | 8.0  | 98-1/8        | 161-5/8     |
| Special Tag | 32       | 32-4/8        | 37     | 15-1/8        | 15-1/8 | 23-7/8 | 6.0  | 99-6/8        | 155-2/8     |
| 6002        | 12A/12BW | 33-3/8        | 33-2/8 | 14-5/8        | 14-4/8 | 21-3/8 | 7.0  | 95-6/8        | 162-1/8     |
| 6002        | 12A/12BW | 28-6/8        | 28-3/8 | 15            | 15     | 22     | 7.0  | 87-1/8        | 155-1/8     |
| 6003        | 12BE     | 30-4/8        | 31-5/8 | 14-4/8        | 14     | 23-4/8 | 8.0  | 90-5/8        | 154-5/8     |
| 6004        | 13A      | 29-5/8        | 29     | 14-2/8        | 14-2/8 | 20     | 8.0  | 87-1/8        | 158-3/8     |
| 6004        | 13A      | 26-2/8        | 27-6/8 | 14-7/8        | 14-4/8 | 26     | 9.0  | 83-3/8        | 147-4/8     |
| 6004        | 13A      | 27-3/8        | 27-2/8 | 12            | 12     | 19-3/8 | 6.0  | 78-5/8        | 128-1/8     |
| 6005        | 13BN     | 32-7/8        | 29-3/8 | 14-6/8        | 14-6/8 | 20-5/8 | 7.0  | 91-6/8        | 150-6/8     |
| 6005        | 13BN     | 29            | 29-4/8 | 13-2/8        | 13-2/8 | 19     | 6.0  | 85            | 142-2/8     |
| 6005        | 13BN     | 33-2/8        | 33-2/8 | 13-2/8        | 13-6/8 | 19     | 10.0 | 93-4/8        | 158-4/8     |
| 6005        | 13BN     | 27            | 27-3/8 | 14-1/8        | 14-2/8 | 20-3/8 | 4.0  | 82-6/8        | 131-3/8     |
| 6007        | 15A/15B  | 26-6/8        | 29-3/8 | 14-1/8        | 14-1/8 | 18     | 9.0  | 84-3/8        | 141-3/8     |
| 6008        | 15BW     | 33            | 32     | 13-3/8        | 14-2/8 | 27-3/8 | 8.0  | 93-5/8        | 155-2/8     |
| 6008        | 15BW     | 26-3/8        | 25-1/8 | 12-6/8        | 12-4/8 | 17-2/8 | 5.0  | 76-6/8        | 117-4/8     |
| 6008        | 15BW     | 30            | 29     | 15            | 14-7/8 | 20-1/8 | 7.0  | 88-7/8        | 142-4/8     |
| 6009        | 15CN     | 29-1/8        | 28-2/8 | 15-1/8        | 15-2/8 | 22-2/8 | 5.0  | 87-6/8        | 145-7/8     |
| 6009        | 15CN     | 30-2/8        | 31     | 15-1/8        | 15-2/8 | 24-1/8 | 6.0  | 91-5/8        | 160-4/8     |
| 6009        | 15CN     | 33-6/8        | 29-5/8 | 14            | 13-7/8 | 26-5/8 | 6.0  | 91-2/8        | 148-3/8     |
| 6010        | 15CS     | 29            | 31-4/8 | 13-3/8        | 13-3/8 | 22-3/8 | 8.0  | 87-2/8        | 148-4/8     |
| 6011        | 15D      | 34-1/8        | 31-4/8 | 15-2/8        | 15-2/8 | 23-6/8 | 5.0  | 96-1/8        | 151-1/8     |
| 6011        | 15D      | 36            | 36-4/8 | 15-6/8        | 15-4/8 | 30     | 8.0  | 103-6/8       | 169-4/8     |
| 6011        | 15D      | 31-1/8        | 35-3/8 | 14-3/8        | 14-5/8 | 23-2/8 | 8.0  | 95-4/8        | 155-4/8     |
| 6012        | 16A      | 32            | 33     | 15-6/8        | 15-5/8 | 21-3/8 | 6.0  | 96-3/8        | 163-6/8     |
| 6013        | 16B      | 25-4/8        | 27-2/8 | 13-4/8        | 14     | 19-4/8 | 4.0  | 80-2/8        | 125-6/8     |
| 6013        | 16B      | 23            | 24-4/8 | 12            | 12     | 21     | 3.0  | 71-4/8        | 114         |
| 6014        | 22       | 33-5/8        | 34-2/8 | 14            | 13-4/8 | 23     | 11.0 | 95-3/8        | 163-5/8     |
| 6015        | 24BN     | 34-1/8        | 34-5/8 | 14-5/8        | 14-5/8 | 21-2/8 | —    | 98            | 160         |
| 6016        | 24BS     | 33-4/8        | 34-1/8 | 14-7/8        | 15     | 20-4/8 | 7.0  | 97-4/8        | 167-5/8     |
| 6017        | 28S      | 31-4/8        | 31-4/8 | 16-5/8        | 15-6/8 | 21-4/8 | 6.0  | 95-3/8        | 165-6/8     |
| 6018        | 31/32    | 36            | 35-3/8 | 15            | 15     | 20-7/8 | 12.0 | 101-3/8       | 171-3/8     |
| 6018        | 31/32    | 34-5/8        | 32-5/8 | 13-3/8        | 13-2/8 | 22-1/8 | 11.0 | 93-7/8        | 155         |
| 6019        | 37A      | 32            | 33-4/8 | 15            | 14-7/8 | 20     | 7.0  | 95-3/8        | 164         |
| 6019        | 37A      | 35-4/8        | 33     | 15-1/8        | 15-1/8 | 20-4/8 | 8.5  | 98-6/8        | 168-6/8     |
| 6020        | 39W      | 35-6/8        | 36-4/8 | 13-7/8        | 14     | 20-5/8 | 8.0  | 100-1/8       | 169-6/8     |
| 6020        | 39W      | 33-4/8        | 33     | 14            | 13-2/8 | 20-2/8 | 11.0 | 93-6/8        | 153-6/8     |
| 6021        | 40BW     | 31            | 30     | 13-2/8        | 12-6/8 | 17-5/8 | 11.0 | 87            | 147-6/8     |
| 6021        | 40BW     | 31-7/8        | 31-5/8 | 14-6/8        | 14-7/8 | 21     | 10.0 | 93-1/8        | 159-4/8     |
| 6022        | 40BW     | 29-3/8        | 30-2/8 | 14-1/8        | 14-2/8 | 17-1/8 | 6.0  | 88            | 142-3/8     |
| 6023        | 40BW     | 32            | 32-6/8 | 14-3/8        | 14-6/8 | 20-3/8 | 8.0  | 93-7/8        | 158         |
| 6024        | 41E      | 33-6/8        | 34     | 14-6/8        | 14-5/8 | 21-2/8 | 10.0 | 97-1/8        | 168-2/8     |
| 6024        | 41E      | 34-4/8        | 34-5/8 | 15            | 15-2/8 | 23-4/8 | 5.0  | 99-3/8        | 157-3/8     |
| 6024        | 41E      | 32            | 35-3/8 | 14-7/8        | 14-7/8 | 22-7/8 | 7.0  | 97-1/8        | 163-1/8     |
| 6025        | 41W      | 31-4/8        | 30-2/8 | 14            | 14     | 18     | 8.5  | 89-6/8        | 152-2/8     |
| 6025        | 41W      | 30-2/8        | 32-6/8 | 14-1/8        | 14-4/8 | 23-6/8 | 6.0  | 91-5/8        | 149-2/8     |
| 6025        | 41W      | 27-4/8        | 29-6/8 | 14-1/8        | 14     | 20-6/8 | 6.0  | 85-3/8        | 144-6/8     |
| 6026        | 43A      | 26-4/8        | 31     | 14-6/8        | 14-6/8 | 24-4/8 | 7.0  | 87            | 145-2/8     |
| 6027        | 43B      | 33-1/8        | 32-5/8 | 14-4/8        | 14-3/8 | 21-5/8 | 8.0  | 94-5/8        | 160         |
| 6027        | 43B      | 30-7/8        | 32-3/8 | 15            | 15-1/8 | 21-4/8 | 6.0  | 93-3/8        | 155         |
| 6027        | 43B      | 34-2/8        | 34-2/8 | 14-6/8        | 14-6/8 | 22-4/8 | 9.0  | 98            | 165-6/8     |
| 6027        | 43B      | 33-1/8        | 29-6/8 | 14-4/8        | 14-4/8 | 19-5/8 | 7.0  | 91-7/8        | 154-5/8     |
| 6027        | 43B      | 30-6/8        | 30-6/8 | 13-3/8        | 13-5/8 | 19-6/8 | 8.0  | 88-4/8        | 151-6/8     |
| 6028        | 44AE     | 29-7/8        | 31     | 14            | 14     | 21     | 7.0  | 88-7/8        | 151-7/8     |
| 6029        | 44AW     | 33-7/8        | 34-5/8 | 16-2/8        | 15-7/8 | 23-7/8 | 7.0  | 100-5/8       | 169-2/8     |
| 6030        | 44BN     | 36            | 36     | 15-4/8        | 15-5/8 | 21-2/8 | 10.0 | 103-1/8       | 178         |
| 6030        | 44BN     | 30-2/8        | 32-5/8 | 13-6/8        | 14-2/8 | 21-5/8 | 8.0  | 90-7/8        | 156-7/8     |
| 6030        | 44BN     | 35-7/8        | 36-6/8 | 15            | 15     | 23-4/8 | 8.0  | 102-5/8       | 171-3/8     |
| 6031        | 44BS     | 34            | 32-1/8 | 15            | 15-1/8 | 20-4/8 | 9.0  | 96-2/8        | 169-5/8     |
| 6032        | 45A      | 29-6/8        | 32-7/8 | 14-1/8        | 14-3/8 | 21-4/8 | 7.0  | 91-1/8        | 156-1/8     |
| 6032        | 45A      | 18-1/8        | 18-2/8 | 11            | 11-2/8 | 18-2/8 | 2.0  | 58-5/8        | 94-3/8      |
| 6032        | 45A      | 31-2/8        | 30-6/8 | 14-1/8        | 14-2/8 | 20-4/8 | 4.0  | 90-3/8        | 150-6/8     |

## Bighorn Hunt Data

*Successful Hunters and the Measurements of their Bighorn Sheep - 2008 Season (continued)*

| Hunt Number | Unit    | Curl (Inches) |        | Base (Inches) |        | Spread | Age  | Arizona Score | Green Score |
|-------------|---------|---------------|--------|---------------|--------|--------|------|---------------|-------------|
|             |         | Left          | Right  | Left          | Right  |        |      |               |             |
| 6033        | 45B     | 31-4/8        | 28-6/8 | 13            | 13     | 20-7/8 | 8.0  | 86-2/8        | 151         |
| 6033        | 45B     | 26-2/8        | 27-4/8 | 13-7/8        | 13-6/8 | 20-2/8 | 6.0  | 81-3/8        | 138         |
| 6034        | 45C     | 34-2/8        | 31-6/8 | 15-6/8        | 15-6/8 | 22-7/8 | 8.0  | 97-4/8        | 163         |
| 6034        | 45C     | 33-5/8        | 34     | 14-1/8        | 13-6/8 | 19     | 6.0  | 95-4/8        | 158-1/8     |
| 6034        | 45C     | 32            | 30     | 14-2/8        | 14-2/8 | 23     | 8.0  | 90-4/8        | 154         |
| 6034        | 45C     | 29-2/8        | 28-5/8 | 13-4/8        | 13-2/8 | 19-1/8 | 6.0  | 84-5/8        | 129-7/8     |
| 6035        | 46A     | 32-2/8        | 32-7/8 | 14-6/8        | 14-4/8 | 20-7/8 | 10.0 | 94-3/8        | 156-5/8     |
| 6035        | 46A     | 38-6/8        | 38-2/8 | 16-2/8        | 16-2/8 | 21-1/8 | 11.0 | 109-4/8       | 182-2/8     |
| 6036        | 46B     | 29-2/8        | 28-4/8 | 16            | 15-7/8 | 20-4/8 | 5.0  | 89-5/8        | 151-6/8     |
| 6036        | 46B     | 27-1/8        | 27     | 14-2/8        | 14-6/8 | 18-3/8 | 4.0  | 83-1/8        | 130-7/8     |
| 6036        | 46B     | 33-5/8        | 34     | 14-6/8        | 14-6/8 | 23-1/8 | 11.0 | 97-1/8        | 167-5/8     |
| 6036        | 46B     | 31-4/8        | 29-6/8 | 15            | 15     | 19-6/8 | 8.0  | 91-2/8        | 157-4/8     |
| 6036        | 46B     | 29-4/8        | 29-6/8 | 14            | 14     | 19-4/8 | 6.0  | 87-2/8        | 151-2/8     |
| 6051        | 01/27N  | 34            | 33-5/8 | 15-2/8        | 15-1/8 | 23-6/8 | 7.0  | 98            | 166-7/8     |
| 6053        | 27BC    | 35-7/8        | 35-7/8 | 15            | 15     | 20-7/8 | 5.0  | 101-6/8       | 171-6/8     |
| 6054        | 27/28   | 36            | 33-4/8 | 14-6/8        | 14-6/8 | 21-3/8 | 7.0  | 99            | 166-6/8     |
| 6054        | 27/28   | 35-2/8        | 35-5/8 | 15            | 15-1/8 | 21-2/8 | 8.0  | 101           | 172-3/8     |
| 6054        | 27/28   | 35-4/8        | 34     | 14-3/8        | 14-7/8 | 23-7/8 | 8.0  | 98-6/8        | 165-4/8     |
| 6055        | 27/28   | 37-3/8        | 37-6/8 | 14-6/8        | 14-7/8 | 23-7/8 | 8.0  | 104-6/8       | 174-3/8     |
| 6055        | 27/28   | 37-7/8        | 37-4/8 | 13-6/8        | 13-6/8 | 19-4/8 | 8.0  | 102-7/8       | 171-1/8     |
| 6055        | 27/28   | 39-2/8        | 35-6/8 | 16-2/8        | 16-1/8 | 21-4/8 | 8.0  | 107-3/8       | 183-2/8     |
| 6056        | 27N     | 34-4/8        | 36     | 16            | 16     | 25     | 8.0  | 102-4/8       | 174-4/8     |
| 6056        | 27N     | 34-6/8        | 31-7/8 | 16-1/8        | 15-5/8 | 21-4/8 | 7.0  | 98-3/8        | 167-3/8     |
| 6056        | 27N     | 34-7/8        | 39     | 15-4/8        | 15-4/8 | 21     | 8.0  | 104-7/8       | 179-1/8     |
| Total       | Minimum | 18-1/8        | 18-2/8 | 11            | 11-2/8 | 17-1/8 | 2.0  | 58-5/8        | 94-3/8      |
| Total       | Maximum | 39-2/8        | 39     | 16-5/8        | 16-2/8 | 30     | 12.0 | 109-4/8       | 183-2/8     |
| Total       | Average | 32            | 32     | 14-4/8        | 14-4/8 | 21-4/8 | 7.4  | 92-7/8        | 155-6/8     |

# Bighorn Hunt Data

## Bighorn Sheep Horn Measurements

| Year | Arizona Score <sup>1</sup> |               |              | Outside Curl | Average Basal Circumference | Average B&C Green Score |
|------|----------------------------|---------------|--------------|--------------|-----------------------------|-------------------------|
|      | Largest Head               | Smallest Head | Average Head |              |                             |                         |
| 1953 | 102-1/8                    | 56-2/8        | 85-2/8       | 29-1/8       | 13-4/8                      | —                       |
| 1954 | 97                         | 65-5/8        | 83-5/8       | 28-4/8       | 13-2/8                      | —                       |
| 1955 | 93-6/8                     | 66            | 84-6/8       | 28-2/8       | 14                          | —                       |
| 1956 | 93-4/8                     | 65-2/8        | 80           | 27-3/8       | 12-5/8                      | —                       |
| 1957 | 82                         | 60-2/8        | 73-5/8       | 24-6/8       | 12-1/8                      | —                       |
| 1958 | 102-6/8                    | 74            | 86-3/8       | 29-3/8       | 13-7/8                      | —                       |
| 1959 | 100-2/8                    | 63-4/8        | 84           | 28-4/8       | 13-4/8                      | —                       |
| 1960 | 100-2/8                    | 68-4/8        | 86-6/8       | 29-4/8       | 13-7/8                      | —                       |
| 1961 | 110-5/8                    | 63-2/8        | 84-1/8       | 28-5/8       | 13-3/8                      | —                       |
| 1962 | 101-2/8                    | 63-6/8        | 83-7/8       | 28-3/8       | 13-4/8                      | —                       |
| 1963 | 105-4/8                    | 60            | 82-2/8       | 27-6/8       | 13-3/8                      | —                       |
| 1964 | 102-2/8                    | 72-4/8        | 88-3/8       | 30-1/8       | 14-1/8                      | —                       |
| 1965 | 113-1/8                    | 71-4/8        | 89           | 30-1/8       | 14-3/8                      | —                       |
| 1966 | 108-6/8                    | 74            | 91-2/8       | 31           | 14-5/8                      | —                       |
| 1967 | 104-5/8                    | 76-2/8        | 91-4/8       | 31           | 14-6/8                      | —                       |
| 1968 | 103-5/8                    | 68-2/8        | 89-1/8       | 30           | 14-4/8                      | —                       |
| 1969 | 106-2/8                    | 71            | 89-2/8       | 30-2/8       | 14-3/8                      | —                       |
| 1970 | 104-6/8                    | 76-2/8        | 89-5/8       | 30-4/8       | 14-2/8                      | —                       |
| 1971 | 103-6/8                    | 70-2/8        | 87-3/8       | 29-3/8       | 14-2/8                      | —                       |
| 1972 | 106-2/8                    | 72-1/8        | 89           | 30           | 14-4/8                      | 147-4/8                 |
| 1973 | 103-5/8                    | 72-7/8        | 89-5/8       | 30-5/8       | 14-2/8                      | 150-3/8                 |
| 1974 | 111-2/8                    | 68-3/8        | 91           | 31-1/8       | 14-3/8                      | 152-2/8                 |
| 1975 | 106-6/8                    | 74-4/8        | 89           | 30-4/8       | 14                          | 148-7/8                 |
| 1976 | 104-4/8                    | 74-7/8        | 91-6/8       | 31-2/8       | 14-5/8                      | 154-6/8                 |
| 1977 | 104-1/8                    | 75            | 91-5/8       | 31-3/8       | 14-3/8                      | 153-6/8                 |
| 1978 | 108                        | 74-3/8        | 92-3/8       | 31-4/8       | 14-5/8                      | 155-7/8                 |
| 1979 | 108-4/8                    | 71-3/8        | 91-3/8       | 31-2/8       | 14-4/8                      | 153-1/8                 |
| 1980 | 105                        | 82-1/8        | 92-4/8       | 31-5/8       | 14-4/8                      | 153-3/8                 |
| 1981 | 110-3/8                    | 82-6/8        | 94-3/8       | 32-2/8       | 15                          | 160-2/8                 |
| 1982 | 114-4/8                    | 81-4/8        | 92-4/8       | 31-6/8       | 14-4/8                      | 154-5/8                 |
| 1983 | 112-3/8                    | 71-5/8        | 93-3/8       | 32           | 14-5/8                      | 156-7/8                 |
| 1984 | 111-5/8                    | 79-3/8        | 94           | 32-3/8       | 14-5/8                      | 159-1/8                 |
| 1985 | 107-6/8                    | 74-4/8        | 92-6/8       | 31-7/8       | 14-4/8                      | 156-2/8                 |
| 1986 | 110-2/8                    | 80-7/8        | 94-4/8       | 32-4/8       | 14-6/8                      | 160-2/8                 |
| 1987 | 110                        | 77            | 94-3/8       | 32-5/8       | 14-5/8                      | 159-4/8                 |
| 1988 | 117-2/8                    | 51-2/8        | 93-1/8       | 32           | 14-4/8                      | 157-2/8                 |
| 1989 | 103-4/8                    | 78-6/8        | 92-6/8       | 31-7/8       | 14-3/8                      | 157-4/8                 |
| 1990 | 113-2/8                    | 58-4/8        | 93-5/8       | 32-1/8       | 14-5/8                      | 157-7/8                 |
| 1991 | 107-2/8                    | 67-1/8        | 92-7/8       | 31-6/8       | 14-5/8                      | 157-5/8                 |
| 1992 | 108-6/8                    | 65            | 92-4/8       | 31-7/8       | 14-3/8                      | 155-3/8                 |
| 1993 | 112-3/8                    | 69-2/8        | 92-4/8       | 31-7/8       | 14-3/8                      | 156-3/8                 |
| 1994 | 110-2/8                    | 77-3/8        | 94-2/8       | 32-5/8       | 14-4/8                      | 159-6/8                 |
| 1995 | 110-3/8                    | 77-2/8        | 92-5/8       | 31-7/8       | 14-3/8                      | 156-3/8                 |
| 1996 | 114-4/8                    | 66-6/8        | 93           | 32-1/8       | 14-4/8                      | 156-6/8                 |
| 1997 | 108-3/8                    | 69-2/8        | 92-1/8       | 31-6/8       | 14-4/8                      | 156-5/8                 |
| 1998 | 112                        | 61-1/8        | 91-4/8       | 31-4/8       | 14-4/8                      | 155-7/8                 |
| 1999 | 109                        | 63-6/8        | 91-6/8       | 31-5/8       | 14-4/8                      | 156-7/8                 |
| 2000 | 110-4/8                    | 65-6/8        | 92-6/8       | 31-7/8       | 14-4/8                      | 157-1/8                 |
| 2001 | 107-6/8                    | 73-6/8        | 91-6/8       | 31-5/8       | 14-3/8                      | 155                     |
| 2002 | 107-7/8                    | 53-3/8        | 90-4/8       | 31-1/8       | 14-2/8                      | 153-3/8                 |
| 2003 | 108-6/8                    | 66-7/8        | 89-3/8       | 30-5/8       | 14-2/8                      | 151-6/8                 |
| 2004 | 106-5/8                    | 73-2/8        | 91-5/8       | 31-4/8       | 14-3/8                      | 155-7/8                 |
| 2005 | 104-3/8                    | 69-2/8        | 90-6/8       | 31           | 14-2/8                      | 152-3/8                 |
| 2006 | 109-4/8                    | 63            | 92-1/8       | 31-5/8       | 14-4/8                      | 156-1/8                 |
| 2007 | 113-5/8                    | 74-3/8        | 93           | 32-1/8       | 14-3/8                      | 156-5/8                 |
| 2008 | 109-4/8                    | 58-5/8        | 92-7/8       | 32           | 14-4/8                      | 155-6/8                 |

<sup>1</sup> Arizona score = sums of the 2 bases and the 2 curls.

# Bighorn Hunt Data

## 2008 Bighorn Sheep Hunt Applications

| Hunt No. | Unit               | Permits Authorized | First Choice |         | Second Choice |         |
|----------|--------------------|--------------------|--------------|---------|---------------|---------|
|          |                    |                    | Applicants   | % Drawn | Applicants    | % Drawn |
| 6001     | 9/10               | 1                  | 41           | 2.4     | 18            | 0.0     |
| 6002     | 12A/12B W          | 2                  | 53           | 3.8     | 49            | 0.0     |
| 6003     | 12B E              | 1                  | 44           | 2.3     | 30            | 0.0     |
| 6004     | 13A                | 3                  | 256          | 0.4     | 248           | 0.8     |
| 6005     | 13B N              | 4                  | 722          | 0.6     | 340           | 0.0     |
| 6006     | 13B S              | 1                  | 17           | 5.9     | 29            | 0.0     |
| 6007     | 15A/15BE           | 1                  | 24           | 4.2     | 29            | 0.0     |
| 6008     | 15B W              | 3                  | 190          | 1.6     | 178           | 0.0     |
| 6009     | 15C N              | 3                  | 162          | 0.6     | 219           | 0.9     |
| 6010     | 15C S              | 1                  | 16           | 6.3     | 48            | 0.0     |
| 6011     | 15D                | 3                  | 263          | 0.8     | 222           | 0.5     |
| 6012     | 16A                | 1                  | 25           | 0.0     | 38            | 2.6     |
| 6013     | 16B                | 2                  | 112          | 0.0     | 116           | 1.7     |
| 6014     | 22                 | 1                  | 261          | 0.4     | 130           | 0.0     |
| 6015     | 24B N              | 1                  | 138          | 0.0     | 169           | 0.6     |
| 6016     | 24B S              | 1                  | 136          | 0.7     | 128           | 0.0     |
| 6017     | 28                 | 1                  | 118          | 0.8     | 83            | 0.0     |
| 6018     | 31/32              | 2                  | 999          | 0.2     | 239           | 0.0     |
| 6019     | 37A                | 2                  | 317          | 0.6     | 356           | 0.0     |
| 6020     | 39 W               | 2                  | 184          | 0.0     | 215           | 0.9     |
| 6021     | 40BW Gila Mtns     | 3                  | 207          | 1.0     | 188           | 0.5     |
| 6022     | 40BW Mohawk/Copper | 3                  | 106          | 1.9     | 285           | 0.4     |
| 6023     | 40BW Tinajas Altas | 1                  | 26           | 3.8     | 24            | 0.0     |
| 6024     | 41 E               | 3                  | 359          | 0.6     | 296           | 0.3     |
| 6025     | 41 W               | 3                  | 287          | 0.3     | 301           | 0.7     |
| 6026     | 43A                | 1                  | 27           | 0.0     | 44            | 2.3     |
| 6027     | 43B                | 5                  | 335          | 1.5     | 343           | 0.0     |
| 6028     | 44A E              | 1                  | 37           | 2.7     | 40            | 0.0     |
| 6029     | 44A W              | 1                  | 22           | 4.5     | 38            | 0.0     |
| 6030     | 44B N              | 3                  | 548          | 0.5     | 430           | 0.0     |
| 6031     | 44B S              | 1                  | 56           | 0.0     | 87            | 1.1     |
| 6032     | 45A                | 3                  | 174          | 1.7     | 253           | 0.0     |
| 6033     | 45B                | 2                  | 110          | 0.0     | 281           | 0.7     |
| 6034     | 45C                | 4                  | 527          | 0.8     | 495           | 0.0     |
| 6035     | 46A                | 2                  | 146          | 1.4     | 179           | 0.0     |
| 6036     | 46B                | 6                  | 229          | 1.3     | 299           | 1.0     |
| 6051     | 1/27N Black River  | 1                  | 202          | 0.5     | 137           | 0.0     |
| 6052     | 23/24A             | 1                  | 143          | 0.7     | 68            | 0.0     |
| 6053     | 27 Bear Canyon     | 1                  | 71           | 0.0     | 100           | 1.0     |
| 6054     | 27S/28N E          | 3                  | 520          | 0.2     | 522           | 0.4     |
| 6055     | 27S/28N L          | 3                  | 189          | 0.0     | 677           | 0.4     |
| 6056     | 27N Foote Creek    | 3                  | 618          | 0.5     | 379           | 0.0     |
| 6997     | Auction            | 1                  | 0            | —       | 0             | —       |
| 6998     | Auction            | 1                  | 0            | —       | 0             | —       |
| 6999     | Raffle             | 1                  | 0            | —       | 0             | —       |
| TOTAL    |                    | 93                 | 9017         | 0.7     | 8350          | 0.3     |

One tag for hunt 6035 was issued by the Director after the draw. Total tags issued including the Auction and Raffle was 94.

---

## Buffalo (*Bison bison*)

---

### *Natural History*

Although these animals are not native to Arizona, American bison, more commonly known as buffalo, are found at two wildlife areas managed by the Arizona Game and Fish Department: Raymond Ranch Wildlife Area located east of Flagstaff, and House Rock Wildlife Area in House Rock Valley east of the North Kaibab National Forest. Approximately 250 buffalo inhabit the two areas, which are managed to provide both viewing and sport-hunting opportunities.

Buffalo are the largest living member of the cow family. Live adult weights range from 1,400 to 2,500

pounds for bulls and from 750 to 1,600 pounds for cows. Bulls have massive front quarters with a large hump above the shoulders covered with woolly hair up to 1.5 inches long that also covers the head and forelegs. This hair turns tan with age and is two to five times thicker than the hair on the hindquarters. The bull's head has a broad triangular appearance and possesses a beard or bell. Both bulls and cows possess horns, but the male's are much larger, attaining a length of up to 20 inches. Calves are reddish-tan at birth and change to brown or black in three months.

The senses of smell and hearing are acute, while the buffalo's eyesight is poor. Adult buffalo can run sprints

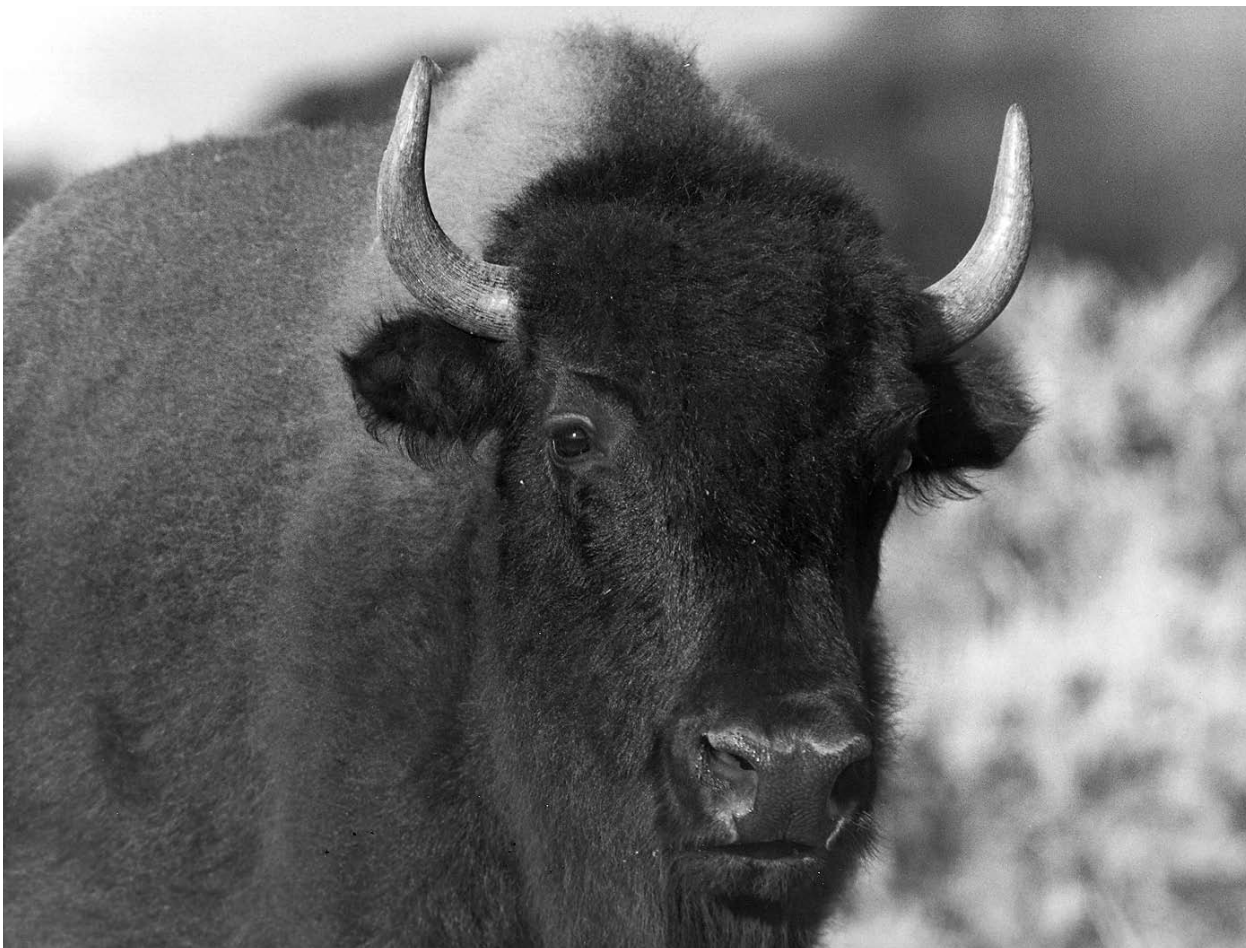

GEORGE ANDREKO

of 35 mph for up to one-quarter mile and are capable of jumping over 6-foot-high fences. Buffalo are gregarious and often form large herds. Although the group composition of these herds changes constantly, the dominant animal is almost always a matriarchal cow. Adult buffalo eat approximately 35 pounds of forage per day, in general concentrating on the most abundant palatable forage, be it grasses, forbs, or browse. Buffalo may live as long as 28 years.

Breeding typically takes place from mid-July to early September. The bulls are polygamous, but do not maintain harems in the usual sense. Most of the breeding is done by mature bulls of five to eight years old. A bull can lose up to 300 pounds during the rut. Gestation ranges from 270 to 285 days, and typically a single calf is born in the spring from late April through May.

Numerous state and federal agencies, as well as private ranchers, have been trying to develop representative herds of free-ranging buffalo. Their goal is to maintain buffalo populations that provide recreational hunting, scientific research, and aesthetic uses with minimal management efforts. In these areas, hunting and live-animal sales are necessary to remove excess animals and keep the habitat within carrying capacity.

### *Hunt History*

Public buffalo hunts have been held at House Rock Ranch since the 1920s. These buffalo, which were originally brought to Arizona by Charles Jesse "Buffalo" Jones, were sold to the state by Uncle Jimmie Owens after their "cattalo" experiment proved unsuccessful. When the number of buffalo was judged excessive for their Forest Service grazing lands in the mid-1940s, the Arizona Game and Fish Department moved some of

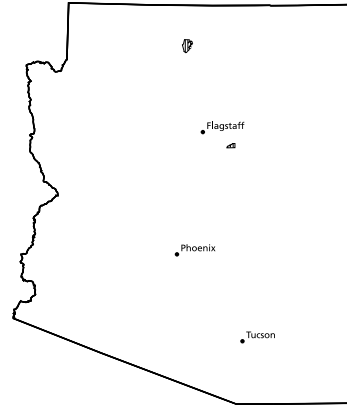

### **Buffalo distribution**

them to the agency's newly acquired Raymond Ranch. Other buffalo were moved to Fort Huachuca, which the Department acquired after World War II. The tenure of these latter animals was short, however, as they had to be disposed of when the Fort was reactivated in the 1950s. Some were sold and sent to the state of Chihuahua, Mexico, and the remainder were removed through a public hunt.

The herds at House Rock and Raymond Ranch wildlife areas remained, however, and the Department set out to manage these herds on a sustained basis. A economic profit proved elusive, however, as it was impossible to sustain sufficient breeding stock without damaging the range. Moreover, the shooting of buffalo being driven out of a corral, while making economic sense, became increasingly difficult to justify from a sociological perspective. As a result, both herds were drastically reduced in the early 1970s by hunters who had to take their animals in the field. The management of the buffalo herds is now more in line with the carrying capacity of their respective ranges, with between 45 and 65 buffalo being harvested each year. A special permit has always been required for the taking of this species.

# Buffalo Survey Data

## Historic Summary of Buffalo Survey Data

| Unit      | Year              | Bulls  |           |        | Cows   |           |        | Unclassified Calves | Total | Bulls/<br>100 Cows <sup>1</sup> | Calves/<br>100 Cows <sup>1</sup> |
|-----------|-------------------|--------|-----------|--------|--------|-----------|--------|---------------------|-------|---------------------------------|----------------------------------|
|           |                   | Adults | Yearlings | Calves | Adults | Yearlings | Calves |                     |       |                                 |                                  |
| Statewide | 1953 <sup>2</sup> | 66     | 111       | —      | 168    | —         | —      | —                   | 345   | 39                              | —                                |
|           | 1954 <sup>2</sup> | 156    | 100       | —      | 161    | —         | —      | —                   | 417   | 97                              | —                                |
|           | 1955 <sup>2</sup> | —      | —         | —      | —      | —         | —      | —                   | —     | —                               | —                                |
|           | 1956              | 37     | 86        | 53     | 103    | —         | —      | —                   | 279   | 34                              | 51                               |
|           | 1957 <sup>3</sup> | 12     | 21        | 29     | 60     | 38        | 29     | —                   | 189   | 20                              | 97                               |
|           | 1958 <sup>3</sup> | 38     | 28        | 25     | 69     | 27        | 25     | —                   | 212   | 55                              | 85                               |
|           | 1959 <sup>3</sup> | 20     | 69        | 33     | 77     | 74        | 32     | —                   | 305   | 26                              | 94                               |
|           | 1960 <sup>3</sup> | 36     | 18        | 25     | 85     | 19        | 25     | —                   | 208   | 42                              | 59                               |
|           | 1961              | 75     | 24        | 30     | 131    | 25        | 30     | —                   | 315   | 57                              | 46                               |
|           | 1962 <sup>3</sup> | 41     | 29        | 28     | 104    | 23        | 28     | —                   | 253   | 39                              | 54                               |
|           | 1963 <sup>3</sup> | 52     | 25        | 28     | 107    | 25        | 28     | —                   | 265   | 49                              | 52                               |
|           | 1964 <sup>3</sup> | 49     | 31        | 35     | 99     | 23        | 35     | —                   | 272   | 49                              | 71                               |
|           | 1965 <sup>3</sup> | 51     | 32        | 35     | 115    | 31        | 35     | —                   | 299   | 44                              | 61                               |
|           | 1966 <sup>3</sup> | 37     | 28        | 25     | 89     | 19        | 25     | —                   | 223   | 42                              | 56                               |
|           | 1967 <sup>3</sup> | 43     | 22        | 28     | 97     | 22        | 26     | —                   | 238   | 44                              | 56                               |
|           | 1968 <sup>3</sup> | 31     | 22        | 26     | 86     | 23        | 26     | —                   | 214   | 36                              | 60                               |
|           | 1969 <sup>3</sup> | 36     | 27        | 30     | 91     | 27        | 30     | —                   | 241   | 40                              | 66                               |
|           | 1970 <sup>3</sup> | 24     | 30        | 32     | 91     | 30        | 32     | —                   | 239   | 26                              | 70                               |
|           | 1971 <sup>3</sup> | 37     | 21        | 22     | 80     | 21        | 22     | —                   | 203   | 46                              | 55                               |
|           | 1972              | 47     | 30        | 30     | 108    | 30        | 30     | —                   | 275   | 44                              | 56                               |
|           | 1973 <sup>3</sup> | 44     | 55        | 57     | 167    | 52        | 57     | —                   | 432   | 26                              | 68                               |
|           | 1974              | 81     | 54        | 40     | 129    | 54        | 52     | —                   | 410   | 63                              | 71                               |
|           | 1975              | 92     | 53        | 18     | 97     | 53        | 18     | —                   | 331   | 95                              | 37                               |
|           | 1976              | 94     | 20        | 23     | 89     | 20        | 19     | —                   | 265   | 106                             | 47                               |
|           | 1977              | 72     | 26        | 23     | 63     | 31        | 23     | —                   | 238   | 114                             | 73                               |
|           | 1978              | 57     | 23        | 17     | 73     | 23        | 16     | —                   | 209   | 78                              | 45                               |
|           | 1979              | 40     | 24        | 22     | 39     | 10        | 21     | —                   | 156   | 103                             | 110                              |

### From 1980 to present, data split by Wildlife Area

|               |      |    |    |    |    |    |    |    |     |    |    |
|---------------|------|----|----|----|----|----|----|----|-----|----|----|
| 5B            | 1980 | 18 | 11 | 13 | 35 | 10 | 10 | 0  | 97  | 51 | 66 |
| Raymond       | 1981 | 24 | 13 | 13 | 31 | 10 | 12 | 0  | 103 | 77 | 81 |
| Wildlife Area | 1982 | 20 | 13 | 10 | 29 | 12 | 7  | 0  | 91  | 69 | 59 |
|               | 1983 | 26 | 10 | 8  | 29 | 7  | 9  | 0  | 89  | 90 | 59 |
|               | 1984 | 16 | 8  | 15 | 34 | 10 | 10 | 0  | 93  | 47 | 74 |
|               | 1985 | 15 | 14 | 17 | 39 | 10 | 12 | 0  | 107 | 38 | 74 |
|               | 1986 | 12 | 16 | 15 | 37 | 12 | 15 | 0  | 107 | 32 | 81 |
|               | 1987 | 16 | 15 | 16 | 34 | 15 | 13 | 0  | 109 | 47 | 85 |
|               | 1988 | 16 | 16 | 14 | 37 | 13 | 17 | 0  | 113 | 43 | 84 |
|               | 1989 | 15 | 14 | 9  | 40 | 17 | 21 | 0  | 116 | 38 | 75 |
|               | 1990 | 10 | 9  | 14 | 42 | 21 | 17 | 0  | 113 | 24 | 74 |
|               | 1991 | 10 | 14 | 12 | 43 | 17 | 15 | 0  | 111 | 23 | 63 |
|               | 1992 | 14 | 12 | 14 | 43 | 15 | 16 | 0  | 114 | 33 | 70 |
|               | 1993 | 14 | 14 | 17 | 41 | 16 | 17 | 0  | 119 | 34 | 83 |
|               | 1994 | 12 | 17 | 17 | 39 | 17 | 14 | 0  | 116 | 31 | 79 |
|               | 1995 | 10 | 15 | 12 | 40 | 18 | 18 | 0  | 113 | 25 | 75 |
|               | 1996 | 11 | 0  | 18 | 43 | 0  | 13 | 0  | 85  | 26 | 72 |
|               | 1997 | 4  | 0  | 11 | 41 | 3  | 12 | 0  | 71  | 10 | 56 |
|               | 1998 | 3  | 8  | 14 | 43 | 12 | 12 | 0  | 92  | 7  | 60 |
|               | 1999 | 7  | 13 | 14 | 41 | 14 | 14 | 0  | 103 | 17 | 68 |
|               | 2000 | 5  | 14 | 9  | 37 | 14 | 13 | 0  | 92  | 14 | 59 |
|               | 2001 | 13 | 10 | 0  | 39 | 8  | 0  | 20 | 90  | 33 | 51 |
|               | 2002 | 18 | 12 | 0  | 40 | 9  | 0  | 21 | 100 | 45 | 53 |
|               | 2003 | 20 | 11 | 0  | 38 | 11 | 0  | 24 | 104 | 53 | 63 |
|               | 2004 | 10 | 10 | 0  | 32 | 9  | 0  | 14 | 75  | 31 | 44 |
|               | 2005 | 6  | 3  | 0  | 27 | —  | 0  | 14 | 50  | 22 | 52 |
|               | 2006 | 5  | 8  | 0  | 24 | —  | 0  | 14 | 51  | 21 | 58 |
|               | 2007 | 4  | 4  | 0  | 27 | 7  | 0  | 14 | 56  | 24 | 41 |
|               | 2008 | 4  | 0  | —  | 19 | 4  | —  | 12 | 39  | 21 | 63 |

<sup>1</sup> Based on adult animals only, yearlings excluded.

<sup>2</sup> Both sexes combined for yearlings and calves.

<sup>3</sup> Calf numbers are estimates.

## Buffalo Survey Data

### *Historic Summary of Buffalo Survey Data*

| Unit          | Year | Bulls               |           |        | Cows   |           |        | Unclassified Calves | Total | Bulls/<br>100 Cows <sup>1</sup> | Calves/<br>100 Cows <sup>1</sup> |
|---------------|------|---------------------|-----------|--------|--------|-----------|--------|---------------------|-------|---------------------------------|----------------------------------|
|               |      | Adults              | Yearlings | Calves | Adults | Yearlings | Calves |                     |       |                                 |                                  |
| 12            | 1980 | 14                  | 11        | 10     | 45     | 11        | 15     | 0                   | 106   | 31                              | 56                               |
| House Rock    | 1981 | 18                  | 10        | 10     | 34     | 15        | 10     | 0                   | 97    | 53                              | 59                               |
| Wildlife Area | 1982 | 17                  | 10        | 13     | 40     | 10        | 9      | 0                   | 99    | 43                              | 55                               |
|               | 1983 | 19                  | 13        | 11     | 49     | 9         | 13     | 0                   | 114   | 39                              | 49                               |
|               | 1984 | 25                  | 13        | 9      | 42     | 10        | 0      | 0                   | 99    | 60                              | 21                               |
|               | 1985 | 18                  | 9         | 0      | 46     | 9         | 0      | 26                  | 108   | 39                              | 57                               |
|               | 1986 | 22                  | 13        | 0      | 34     | 13        | 0      | 16                  | 98    | 65                              | 47                               |
|               | 1987 | 41                  | 10        | 0      | 40     | 10        | 0      | 27                  | 128   | 103                             | 68                               |
|               | 1988 | 53                  | 15        | 0      | 44     | 14        | 0      | 31                  | 157   | 120                             | 70                               |
|               | 1989 | 40                  | 12        | 0      | 53     | 23        | 0      | 30                  | 158   | 75                              | 57                               |
|               | 1990 | 23                  | 14        | 0      | 56     | 18        | 0      | 23                  | 134   | 41                              | 41                               |
|               | 1991 | 14                  | 11        | 0      | 53     | 10        | 0      | 30                  | 118   | 26                              | 57                               |
|               | 1992 | 21                  | 12        | 0      | 50     | 11        | 0      | 26                  | 120   | 42                              | 52                               |
|               | 1993 | 23                  | 13        | 0      | 44     | 9         | 0      | 21                  | 110   | 52                              | 48                               |
|               | 1994 | 33                  | 10        | 15     | 41     | 8         | 17     | 0                   | 124   | 80                              | 78                               |
|               | 1995 | 34                  | 15        | 14     | 40     | 17        | 14     | 0                   | 134   | 85                              | 70                               |
|               | 1996 | 31                  | 14        | 14     | 47     | 12        | 14     | 0                   | 132   | 66                              | 60                               |
|               | 1997 | 31                  | 12        | 0      | 47     | 12        | 0      | 21                  | 123   | 66                              | 45                               |
|               | 1998 | 25                  | 9         | 0      | 33     | 10        | 0      | 19                  | 96    | 76                              | 58                               |
|               | 1999 | 29                  | 9         | 9      | 38     | 9         | 9      | 0                   | 103   | 76                              | 47                               |
|               | 2000 | 32                  | 9         | 14     | 42     | 9         | 14     | 0                   | 120   | 76                              | 67                               |
|               | 2001 | No Survey Conducted |           |        |        |           |        |                     |       |                                 |                                  |
|               | 2002 | 50                  | 15        | 0      | 65     | 15        | 0      | 30                  | 175   | 77                              | 45                               |
|               | 2003 | 45                  | 15        | 0      | 80     | 15        | 0      | 40                  | 195   | 56                              | 50                               |
|               | 2004 | 43                  | 9         | 0      | 51     | 7         | 0      | 22                  | 132   | 84                              | 43                               |
|               | 2005 | 41                  | 21        | 0      | 70     | 11        | 0      | 43                  | 185   | 57                              | 61                               |
|               | 2006 | No Survey Conducted |           |        |        |           |        |                     |       |                                 |                                  |
|               | 2007 | No Survey Conducted |           |        |        |           |        |                     |       |                                 |                                  |
|               | 2008 | No Survey Conducted |           |        |        |           |        |                     |       |                                 |                                  |

<sup>1</sup> Based on adult animals only, yearlings excluded.

<sup>2</sup> Both sexes combined for yearlings and calves.

<sup>3</sup> Calf numbers are estimates.



# Buffalo Harvest Data

## Historic Summary of Buffalo Hunts<sup>1</sup>

| Year | 1st Choice Applicants <sup>2</sup> | Permits Issued | Hunters | Hunter Days | Harvest |           |        |           | Calves | Total | Percent Success |
|------|------------------------------------|----------------|---------|-------------|---------|-----------|--------|-----------|--------|-------|-----------------|
|      |                                    |                |         |             | Bulls   |           | Cows   |           |        |       |                 |
|      |                                    |                |         |             | Adults  | Yearlings | Adults | Yearlings |        |       |                 |
| 1950 | —                                  | —              | —       | —           | —       | —         | —      | —         | —      | 92    | —               |
| 1951 | —                                  | —              | —       | —           | —       | —         | —      | —         | —      | 92    | —               |
| 1953 | —                                  | —              | —       | —           | —       | —         | —      | —         | —      | 25    | —               |
| 1955 | —                                  | —              | —       | —           | —       | —         | —      | —         | —      | 35    | —               |
| 1956 | —                                  | —              | —       | —           | —       | —         | —      | —         | —      | 30    | —               |
| 1957 | —                                  | —              | —       | —           | —       | —         | —      | —         | —      | 150   | —               |
| 1958 | —                                  | —              | —       | —           | 28      | 19        | 18     | 20        | 0      | 85    | —               |
| 1959 | —                                  | —              | —       | —           | 7       | 69        | 0      | 74        | 0      | 150   | —               |
| 1960 | —                                  | —              | —       | —           | 26      | 8         | 18     | 8         | 0      | 60    | —               |
| 1961 | —                                  | —              | —       | —           | 65      | 20        | 50     | 20        | 0      | 155   | —               |
| 1962 | —                                  | —              | —       | —           | 29      | 20        | 32     | 15        | 0      | 96    | —               |
| 1963 | —                                  | —              | —       | —           | 42      | 20        | 38     | 20        | 0      | 120   | —               |
| 1964 | —                                  | —              | —       | —           | 39      | 28        | 42     | 21        | 0      | 130   | —               |
| 1965 | —                                  | —              | —       | —           | 41      | 32        | 49     | 28        | 0      | 150   | —               |
| 1966 | —                                  | —              | —       | —           | 28      | 28        | 30     | 14        | 0      | 100   | —               |
| 1967 | —                                  | —              | —       | —           | 34      | 21        | 30     | 20        | 0      | 105   | —               |
| 1968 | —                                  | —              | —       | —           | 21      | 20        | 14     | 20        | 0      | 75    | —               |
| 1969 | —                                  | —              | —       | —           | 25      | 25        | 25     | 25        | 0      | 100   | —               |
| 1970 | —                                  | —              | —       | —           | 12      | 25        | 18     | 25        | 0      | 80    | —               |
| 1971 | —                                  | —              | —       | —           | 24      | 20        | 16     | 20        | 0      | 80    | —               |
| 1972 | —                                  | —              | —       | —           | 32      | 30        | 33     | 30        | 0      | 125   | —               |
| 1973 | —                                  | —              | —       | —           | 15      | 7         | 52     | 22        | 30     | 126   | —               |
| 1974 | —                                  | —              | —       | —           | 9       | 35        | 52     | 34        | 0      | 130   | —               |
| 1975 | —                                  | —              | —       | —           | 10      | 40        | 37     | 32        | 0      | 119   | —               |
| 1976 | —                                  | —              | —       | —           | 7       | 18        | 34     | 16        | 0      | 75    | —               |
| 1977 | —                                  | —              | —       | —           | 15      | 17        | 12     | 12        | 0      | 56    | —               |
| 1978 | —                                  | —              | —       | —           | 26      | 18        | 5      | 9         | 0      | 58    | —               |
| 1979 | —                                  | —              | —       | —           | 14      | 13        | 12     | 0         | 0      | 39    | —               |
| 1980 | 545                                | 57             | 57      | —           | 23      | 6         | 21     | 5         | 0      | 55    | 96.5            |
| 1981 | 329                                | 46             | 46      | —           | 17      | 10        | 19     | 0         | 0      | 46    | 100.0           |
| 1982 | 198                                | 38             | 38      | 51          | 28      | 0         | 9      | 0         | 0      | 37    | 97.4            |
| 1983 | 202                                | 43             | 43      | 97          | 17      | 7         | 14     | 2         | 0      | 40    | 93.0            |
| 1984 | 209                                | 40             | 40      | 76          | 24      | 5         | 9      | 2         | 0      | 40    | 100.0           |
| 1985 | 238                                | 59             | 54      | 119         | 5       | 15        | 22     | 6         | 0      | 48    | 88.9            |
| 1986 | 225                                | 47             | 43      | 108         | 18      | 5         | 12     | 4         | 0      | 39    | 90.7            |
| 1987 | 217                                | 41             | 39      | 69          | 2       | 17        | 3      | 13        | 0      | 35    | 89.7            |
| 1988 | 366                                | 61             | 58      | 154         | 11      | 19        | 15     | 5         | 0      | 50    | 86.2            |
| 1989 | 449                                | 85             | 82      | 251         | 25      | 20        | 8      | 15        | 0      | 68    | 82.9            |
| 1990 | 417                                | 91             | 89      | 369         | 13      | 11        | 14     | 17        | 0      | 55    | 61.8            |
| 1991 | 414                                | 50             | 50      | 127         | 5       | 13        | 17     | 12        | 0      | 47    | 94.0            |
| 1992 | 551                                | 65             | 64      | 210         | 9       | 9         | 15     | 16        | 0      | 49    | 76.6            |
| 1993 | 680                                | 65             | 65      | 233         | 10      | 12        | 8      | 16        | 0      | 46    | 70.8            |
| 1994 | 742                                | 64             | 60      | 176         | 8       | 16        | 7      | 16        | 0      | 47    | 78.3            |
| 1995 | 1075                               | 95             | 90      | 352         | 10      | 20        | 8      | 23        | 0      | 61    | 67.8            |
| 1996 | 1175                               | 71             | 71      | 273         | 14      | 10        | 8      | 13        | 0      | 45    | 63.4            |
| 1997 | 1193                               | 61             | 61      | 152         | 11      | 12        | 20     | 15        | 0      | 58    | 95.1            |
| 1998 | 1431                               | 64             | 64      | 216         | 11      | 9         | 8      | 15        | 0      | 41    | 64.1            |
| 1999 | 1380                               | 49             | 45      | 131         | 3       | 15        | 6      | 12        | 0      | 36    | 80.0            |
| 2000 | 1325                               | 54             | 52      | 164         | 3       | 12        | 7      | 10        | 1      | 33    | 63.5            |
| 2001 | 1360                               | 72             | 70      | 432         | 4       | 8         | 11     | 6         | 0      | 29    | 41.4            |
| 2002 | 3316                               | 50             | 48      | 198         | 20      | 14        | 1      | 3         | 0      | 38    | 79.2            |
| 2003 | 5154                               | 53             | 52      | 203         | 10      | 1         | 27     | 1         | 0      | 39    | 75.0            |
| 2004 | 7788                               | 97             | 84      | 380         | 9       | 20        | 7      | 5         | 0      | 41    | 48.8            |
| 2005 | 3043                               | 26             | 24      | 37          | 4       | 4         | 12     | 2         | 0      | 22    | 91.7            |
| 2006 | 2640                               | 21             | 21      | 70          | 3       | 1         | 9      | 5         | 0      | 18    | 85.7            |
| 2007 | 1232                               | 28             | 28      | 151         | 5       | 10        | 8      | 0         | 0      | 23    | 82.1            |
| 2008 | 868                                | 29             | 27      | 93          | 11      | 10        | 2      | 4         | 0      | 26    | 96.2            |

<sup>1</sup> Data from 1958 through 1979 are proposed harvest. Actual harvest may have varied slightly. Prior to 1980, hunters and hunter days are unknown but should have approximated harvest, with hunt success at or near 100%.

<sup>2</sup> Beginning in 1995, 1st Choice Applicants includes the spring and fall draws.

## Buffalo Hunt Data

### *Population Management Season Results - Unit 12A*

| Year | Season¹   | Permits Issued | Hunters | Hunter Days | Harvest |           |        |           | Calves | Total | Percent Success |
|------|-----------|----------------|---------|-------------|---------|-----------|--------|-----------|--------|-------|-----------------|
|      |           |                |         |             | Bulls   |           | Cows   |           |        |       |                 |
|      |           |                |         |             | Adults  | Yearlings | Adults | Yearlings |        |       |                 |
| 2005 | Companion | 106            | 106     | --          | 3       | 0         | 1      | 0         | 0      | 4     | 3.8             |
| 2005 | Standard  | 20             | 19      | 39          | 5       | 5         | 0      | 2         | 0      | 12    | 63.2            |
| 2006 | Companion | 28             | 28      | --          | 7       | 0         | 0      | 0         | 0      | 7     | 25.0            |
| 2006 | Standard  | 25             | 24      | 52          | 4       | 1         | 1      | 3         | 0      | 9     | 37.5            |
| 2007 | Companion | 59             | 59      | 20          | 5       | 2         | 1      | 0         | 0      | 8     | 13.6            |
| 2007 | Standard  | 8              | 7       | 10          | 0       | 0         | 3      | 1         | 0      | 4     | 57.1            |
| 2008 | Companion | 97             | 97      | 32          | 7       | 1         | 3      | 0         | 0      | 12    | 12.4            |
| 2008 | Standard  | 16             | 12      | 16          | 0       | 3         | 7      | 0         | 0      | 10    | 83.3            |

<sup>1</sup> Designates the type of Population Management Season offered. "Companion" denotes tags issued to hunters with corresponding Kaibab deer hunts. "Standard" denotes seasons authorized through the typical Population Management Season process.

### *5-Year: 2004-2008 Harvest*

| Unit | Year | Season | Dates       | Permits Authorized | 1st Choice Applicants | 2nd Choice Applicants | Draw Odds | Permits Issued | Hunters | Hunter Days | Bull Harvest | Cow Harvest | Total Harvest | Hunt Success |
|------|------|--------|-------------|--------------------|-----------------------|-----------------------|-----------|----------------|---------|-------------|--------------|-------------|---------------|--------------|
| 5B   | 2004 | Bull   | 3/12-3/18   | 2                  | 758                   | 287                   | 0.3       | 2              | 2       | 6           | 2            | 0           | 2             | 100          |
| 5B   | 2004 | Bull   | 8/13-8/19   | 2                  | 2294                  | 606                   | 0.1       | 2              | 2       | 2           | 2            | 0           | 2             | 100          |
| 5B   | 2004 | Bull   | 3/19-3/25   | 2                  | 157                   | 647                   | 0.0       | 2              | 2       | 4           | 2            | 0           | 2             | 100          |
| 5B   | 2005 | Bull   | 5/27-6/05   | 2                  | 950                   | 249                   | 0.2       | 2              | 2       | 6           | 2            | 0           | 2             | 100          |
| 5B   | 2006 | Bull   | 5/26-6/04   | 2                  | 253                   | 54                    | 0.8       | 2              | 2       | 3           | 2            | 0           | 2             | 100          |
| 5B   | 2007 | Bull   | 9/22-9/23   | 1                  | 444                   | 11                    | 0.2       | 1              | 1       | 1           | 1            | 0           | 1             | 100          |
| 5B   | 2004 | Cow    | 12/03-12/06 | 2                  | 153                   | 305                   | 1.3       | 2              | 2       | 2           | 0            | 2           | 2             | 100          |
| 5B   | 2004 | Cow    | 11/19-11/23 | 4                  | 201                   | 261                   | 1.5       | 4              | 3       | 3           | 0            | 3           | 3             | 100          |
| 5B   | 2005 | Cow    | 9/23-9/26   | 3                  | 287                   | 98                    | 1.1       | 3              | 3       | 3           | 0            | 3           | 3             | 100          |
| 5B   | 2005 | Cow    | 11/18-11/21 | 3                  | 185                   | 398                   | 1.6       | 4              | 4       | 4           | 0            | 4           | 4             | 100          |
| 5B   | 2005 | Cow    | 12/02-12/05 | 3                  | 320                   | 148                   | 0.9       | 3              | 3       | 3           | 0            | 3           | 3             | 100          |
| 5B   | 2006 | Cow    | 9/09-9/11   | 2                  | 842                   | 100                   | 0.2       | 2              | 2       | 2           | 0            | 2           | 2             | 100          |
| 5B   | 2006 | Cow    | 9/23-9/25   | 2                  | 198                   | 771                   | 1.0       | 2              | 2       | 2           | 0            | 2           | 2             | 100          |
| 5B   | 2006 | Cow    | 9/30-10/02  | 2                  | 271                   | 531                   | 0.4       | 2              | 2       | 2           | 0            | 2           | 2             | 100          |
| 5B   | 2006 | Cow    | 10/21-10/23 | 2                  | 686                   | 177                   | 0.3       | 2              | 2       | 2           | 0            | 2           | 2             | 100          |
| 5B   | 2007 | Cow    | 9/22-9/23   | 1                  | 54                    | 122                   | 0.0       | 1              | 1       | 1           | 0            | 1           | 1             | 100          |
| 5B   | 2007 | Cow    | 9/29-9/30   | 2                  | 95                    | 117                   | 2.1       | 2              | 2       | 2           | 0            | 2           | 2             | 100          |
| 5B   | 2007 | Cow    | 10/13-10/14 | 2                  | 80                    | 156                   | 0.0       | 2              | 2       | 2           | 0            | 2           | 2             | 100          |
| 5B   | 2007 | Cow    | 10/27-10/28 | 2                  | 106                   | 89                    | 0.9       | 2              | 2       | 2           | 0            | 2           | 2             | 100          |
| 5B   | 2008 | Cow    | 9/27-9/28   | 2                  | 146                   | 8                     | 1.4       | 2              | 2       | 3           | 0            | 1           | 1             | 50           |
| 5B   | 2004 | Yrl    | 9/24-9/27   | 4                  | 402                   | 337                   | 0.5       | 4              | 4       | 4           | 4            | 0           | 4             | 100          |
| 5B   | 2004 | Yrl    | 10/15-10/18 | 4                  | 245                   | 430                   | 0.8       | 4              | 4       | 4           | 4            | 0           | 4             | 100          |
| 5B   | 2004 | Yrl    | 1/02-1/08   | 4                  | 208                   | 57                    | 1.9       | 4              | 4       | 4           | 4            | 1           | 5             | 125          |
| 5B   | 2004 | Yrl    | 1/09-1/15   | 4                  | 49                    | 206                   | 0.0       | 4              | 4       | 4           | 3            | 1           | 4             | 100          |
| 5B   | 2004 | Yrl    | 1/16-1/22   | 4                  | 42                    | 143                   | 4.8       | 4              | 4       | 9           | 2            | 2           | 4             | 100          |
| 5B   | 2004 | Yrl    | 1/23-1/29   | 4                  | 89                    | 66                    | 2.3       | 4              | 4       | 4           | 3            | 1           | 4             | 100          |
| 5B   | 2005 | Yrl    | 1/14-1/20   | 4                  | 297                   | 267                   | 1.0       | 4              | 4       | 5           | 0            | 4           | 4             | 100          |
| 5B   | 2005 | Yrl    | 1/21-1/27   | 4                  | 110                   | 364                   | 0.9       | 5              | 4       | 4           | 0            | 4           | 4             | 100          |
| 5B   | 2006 | Yrl    | 1/14-1/20   | 3                  | 118                   | 72                    | 1.7       | 3              | 3       | 4           | 0            | 3           | 3             | 100          |
| 5B   | 2006 | Yrl    | 2/03-2/10   | 3                  | 59                    | 135                   | 1.7       | 3              | 3       | 3           | 0            | 3           | 3             | 100          |
| 5B   | 2007 | Yrl    | 1/06-1/07   | 2                  | 70                    | 11                    | 2.9       | 2              | 2       | 2           | 2            | 0           | 2             | 100          |
| 5B   | 2007 | Yrl    | 1/13-1/14   | 2                  | 19                    | 76                    | 0.0       | 2              | 2       | 2           | 2            | 0           | 2             | 100          |
| 5B   | 2007 | Yrl    | 1/27-1/28   | 2                  | 38                    | 31                    | 5.3       | 2              | 2       | 2           | 2            | 0           | 2             | 100          |
| 5B   | 2007 | Yrl    | 2/03-2/04   | 2                  | 45                    | 74                    | 4.4       | 2              | 2       | 2           | 2            | 0           | 2             | 100          |
| 5B   | 2008 | Yrl    | 10/04-10/05 | 2                  | 172                   | 85                    | 1.2       | 2              | 2       | 2           | 0            | 2           | 2             | 100          |
| 5B   | 2008 | Yrl    | 10/11-10/12 | 2                  | 81                    | 195                   | 1.2       | 2              | 2       | 2           | 2            | 0           | 2             | 100          |
| 5B   | 2008 | Yrl    | 1/05-1/06   | 2                  | 68                    | 24                    | 2.9       | 2              | 2       | 2           | 2            | 0           | 2             | 100          |
| 5B   | 2008 | Yrl    | 1/12-1/13   | 2                  | 20                    | 67                    | 5.0       | 2              | 2       | 2           | 2            | 0           | 2             | 100          |
| 5B   | 2008 | Yrl    | 1/26-1/27   | 2                  | 34                    | 28                    | 5.9       | 2              | 2       | 2           | 2            | 0           | 2             | 100          |
| 5B   | 2008 | Yrl    | 2/02-2/03   | 2                  | 22                    | 49                    | 4.6       | 2              | 2       | 2           | 0            | 2           | 2             | 100          |
| 5B   | 2008 | Yrl    | 2/09-2/10   | 2                  | 41                    | 33                    | 2.4       | 2              | 2       | 2           | 1            | 1           | 2             | 100          |
| 5B   | 2007 | Any    | 2/10-2/11   | 2                  | 55                    | 29                    | 3.6       | 2              | 2       | 2           | 2            | 0           | 2             | 100          |
| 12A  | 2004 | AB     | 10/15-10/24 | 10                 | 1962                  | 718                   | 0.5       | 10             | 9       | 64          | 0            | 0           | 0             | 0            |
| 12A  | 2004 | CowYr  | 9/17-9/26   | 30                 | 425                   | 241                   | 4.7       | 30             | 23      | 155         | 1            | 1           | 2             | 9            |
| 12A  | 2004 | CowYr  | 10/01-10/10 | 15                 | 52                    | 375                   | 5.8       | 15             | 12      | 64          | 0            | 0           | 0             | 0            |

Yrl = Yearling, CY = Cow or Yearling, Any = Any Buffalo, SP = Special raffle/auction permit.

# Buffalo Hunt Data

## 5-Year: 2004-2008 Harvest

| Unit                                                                                             | Year | Season | Dates     | Permits Authorized | 1st Choice Applicants | 2nd Choice Applicants | Draw Odds | Permits Issued | Hunters | Hunters Days | Bull Harvest | Cow Harvest | Total Harvest | Hunt Success |
|--------------------------------------------------------------------------------------------------|------|--------|-----------|--------------------|-----------------------|-----------------------|-----------|----------------|---------|--------------|--------------|-------------|---------------|--------------|
| 12A                                                                                              | 2004 | Any    | 3/12-4/11 | 4                  | 751                   | 61                    | 0.5       | 4              | 4       | 44           | 1            | 1           | 2             | 50           |
| 12A                                                                                              | 2005 | Any    | —         | 0                  | 0                     | 0                     | —         | 106            | 106     | 0            | 3            | 1           | 4             | 4            |
| 12A                                                                                              | 2005 | Any    | —         | 0                  | 0                     | 0                     | —         | 20             | 19      | 39           | 10           | 2           | 12            | 63           |
| 12A                                                                                              | 2005 | Any    | 3/11-4/10 | 5                  | 894                   | 238                   | 0.6       | 5              | 4       | 12           | 2            | 0           | 2             | 50           |
| 12A                                                                                              | 2006 | Any    | —         | 0                  | 0                     | 0                     | —         | 25             | 24      | 52           | 5            | 4           | 9             | 38           |
| 12A                                                                                              | 2006 | Any    | —         | 0                  | 0                     | 0                     | —         | 28             | 28      | 0            | 7            | 0           | 7             | 25           |
| 12A                                                                                              | 2006 | Any    | 3/10-4/09 | 5                  | 213                   | 62                    | 2.4       | 5              | 5       | 52           | 1            | 1           | 2             | 40           |
| 12A                                                                                              | 2007 | Any    | —         | 8                  | 0                     | 0                     | —         | 8              | 7       | 10           | 0            | 4           | 4             | 57           |
| 12A                                                                                              | 2007 | Any    | —         | 0                  | 0                     | 0                     | —         | 67             | 8       | 20           | 7            | 1           | 8             | 100          |
| 12A                                                                                              | 2007 | Any    | 3/09-4/08 | 5                  | 167                   | 43                    | 3.0       | 5              | 5       | 92           | 0            | 0           | 0             | 0            |
| 12A                                                                                              | 2007 | Any    | 4/13-5/13 | 5                  | 59                    | 142                   | 3.4       | 5              | 5       | 41           | 4            | 1           | 5             | 100          |
| 12A                                                                                              | 2008 | Any    | 1/01-5/31 | 10                 | 284                   | 1                     | 3.5       | 10             | 8       | 64           | 8            | 0           | 8             | 100          |
| 12A                                                                                              | 2004 | SP     | 9/01-4/30 | 2                  | 0                     | 0                     | —         | 2              | 1       | 7            | 1            | 0           | 1             | 100          |
| 12A                                                                                              | 2005 | SP     | —         | 2                  | 0                     | 0                     | —         | 2              | 1       | 2            | 1            | 0           | 1             | 100          |
| 12A                                                                                              | 2006 | SP     | —         | 3                  | 0                     | 0                     | —         | 3              | —       | —            | —            | —           | —             | —            |
| 12A                                                                                              | 2007 | SP     | —         | 3                  | 0                     | 0                     | —         | 3              | —       | —            | —            | —           | —             | —            |
| 12A                                                                                              | 2008 | SP     | —         | 3                  | 0                     | 0                     | —         | 3              | 3       | 12           | 3            | 0           | 3             | 100          |
| <b>TOTAL - SUMMARY FOR RAYMOND RANCH WILDLIFE AREA</b>                                           |      |        |           |                    |                       |                       |           |                |         |              |              |             |               |              |
| 05B                                                                                              | 2004 |        | —         | 36                 | 4598                  | 3345                  | 0.5       | 36             | 35      | 46           | 26           | 10          | 36            | 103          |
| 05B                                                                                              | 2005 |        | —         | 19                 | 2149                  | 1524                  | 0.7       | 21             | 20      | 25           | 2            | 18          | 20            | 100          |
| 05B                                                                                              | 2006 |        | —         | 16                 | 2427                  | 1840                  | 0.5       | 16             | 16      | 18           | 2            | 14          | 16            | 100          |
| 05B                                                                                              | 2007 |        | —         | 18                 | 1006                  | 716                   | 1.2       | 18             | 18      | 18           | 11           | 7           | 18            | 100          |
| 05B                                                                                              | 2008 |        | —         | 16                 | 584                   | 489                   | 2.1       | 16             | 16      | 17           | 9            | 6           | 15            | 94           |
| <b>TOTAL - SUMMARY FOR HOUSE ROCK WILDLIFE AREA (includes Population Management Season data)</b> |      |        |           |                    |                       |                       |           |                |         |              |              |             |               |              |
| 12A                                                                                              | 2004 |        | —         | 61                 | 3190                  | 1395                  | 1.2       | 61             | 49      | 334          | 3            | 2           | 5             | 10           |
| 12A                                                                                              | 2005 |        | —         | 7                  | 894                   | 238                   | 0.6       | 133            | 130     | 53           | 16           | 3           | 19            | 15           |
| 12A                                                                                              | 2006 |        | —         | 8                  | 213                   | 62                    | 2.4       | 58             | 57      | 104          | 13           | 5           | 18            | 32           |
| 12A                                                                                              | 2007 |        | —         | 21                 | 226                   | 185                   | 3.1       | 77             | 25      | 163          | 11           | 6           | 17            | 68           |
| 12A                                                                                              | 2008 |        | —         | 29                 | 284                   | 1                     | 3.5       | 126            | 35      | 124          | 22           | 10          | 32            | 91           |

Yrl = Yearling, CY = Cow or Yearling, Any = Any Buffalo, SP = Special raffle/auction permit.

---

# Black Bear (*Ursus americanus*)

---

## *Natural History*

Black bears in Arizona are found in a variety of habitats, including subalpine and montane conifer forests, riparian forests, evergreen woodlands, and chaparral. An interesting footnote to black bear distribution in the state is the absence of any sizeable population of black bears north of the Colorado River.

Cubs are born in winter dens during January, usually in pairs, but larger litters are not uncommon. Cubs weigh only six to 12 ounces at birth and are helpless, but they grow and develop rapidly, emerging from the den with their mother in April. The mother stays with her cubs through the first summer and fall, and dens with them again the following winter. Female black bears in Arizona usually reach reproductive age in their

fourth year, and generally breed every other year. Normal reproductive cycles in Arizona black bears may be adversely affected by drought, and/or poor physiological condition. Adult males weigh up to 350 pounds and adult females up to 250 pounds. Black bears are relatively long-lived animals, with some individuals exceeding 20 years of age. The statewide population is estimated at 2,500 bears.

Black bears are normally shy, secretive animals displaying high levels of intelligence and exploratory behavior. Although bears are generally most active in the early morning and late evening; they may alter their activity pattern to exploit sources of artificial food, becoming nocturnal at campgrounds and dumpsites. Nuisance activities are nearly always associated with artificial food sources (beehives, campgrounds, and livestock).

Bears are usually solitary animals; the exceptions are family groups (mother

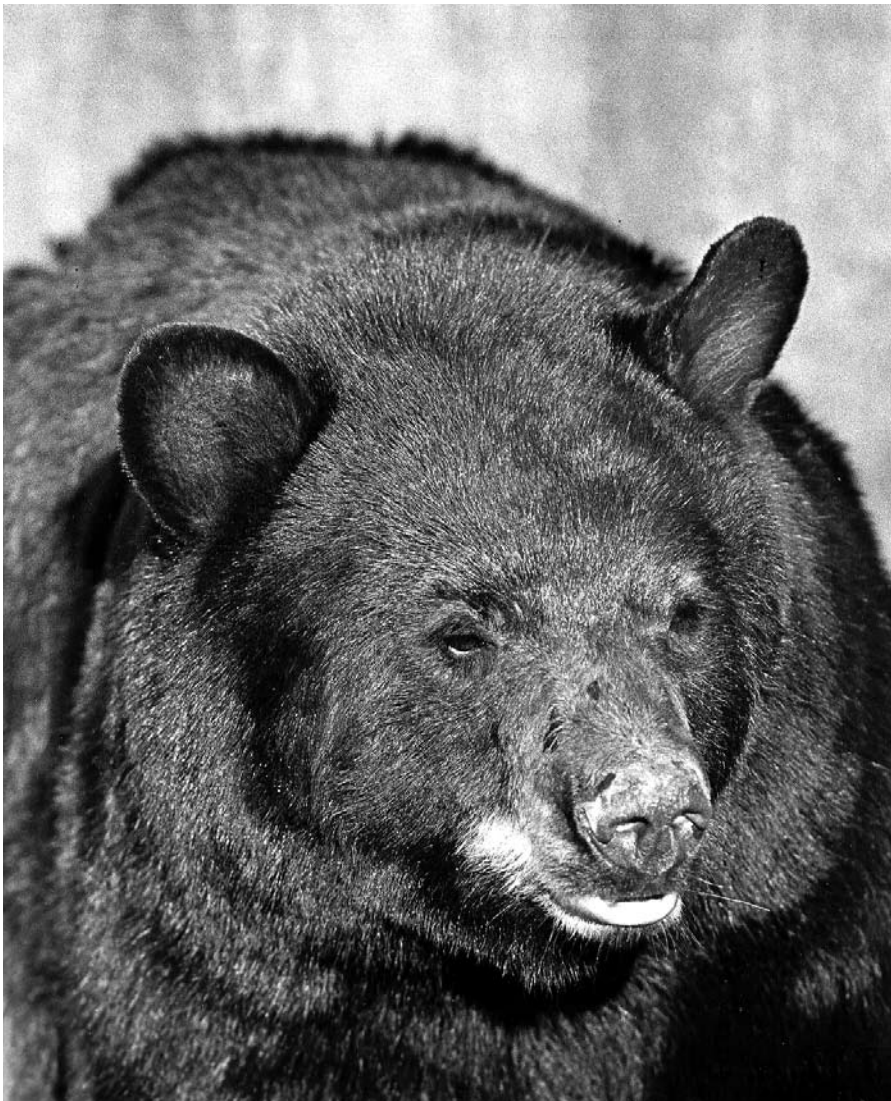

BOB MILES

## Black Bear

and cubs), breeding pairs, and congregations at feeding sites. Both adults and sub-adults are known to move long distances (100 miles) to exploit isolated pockets of food. The mobility of black bears sometimes leads them to appear in uncharacteristic habitats and to return from long distances after being moved. Most Arizona black bears hibernate from November through March, during which time they reduce their body temperature, heart rate, and metabolic function, while still remaining somewhat conscious in the den.

### *Hunt History*

Bear hunting has a long history in Arizona. As late as 1928, bears were classified as predatory animals and could be shot or trapped at any time. In 1929, however, a new "game code" classified bears of all kinds as big game, provided a month-long open season, and prescribed a bag limit of one. Bears could not be trapped, but they could be taken with dogs. Later years were even more restrictive; cubs were protected in 1934, and in 1936, the bear season was closed south of the Gila River.

The status of bears deteriorated drastically during World War II. In 1942 all of the state's refuges were open to bear hunting and the season was reopened in Cochise and Graham counties at the request of stockmen. In 1944, month-long fall and spring hunts were authorized. The following year, bears lost their designation as game animals, and in 1949 a year-long season was authorized for Apache, Greenlee, Graham, and eastern Coconino counties, except during the seasons for other big-game species. After reinstating spring and

fall bear seasons in 1950, the Arizona Game and Fish Commission again opted for year-long seasons from 1951 to 1953.

After 1954, bear regulations became more restrictive, tags were required to take one, and in 1968 the black bear was again classified as big game. This designation was appropriate as hunter interest in the species was increasing. Hunt success varied with weather conditions and population vagaries, but annual bear harvests ranged from 131 to 313 for the years 1964 through 1980. Relatively few bears were taken under the stock-taking clause, most of them being taken

by sport hunters. Concern about the bear's relatively low reproductive rate caused the Department to monitor the bear harvest more closely. Accordingly, mandatory check-out procedures were initiated in 1980. Other recent changes in regulations have included the authorization of a permit-only

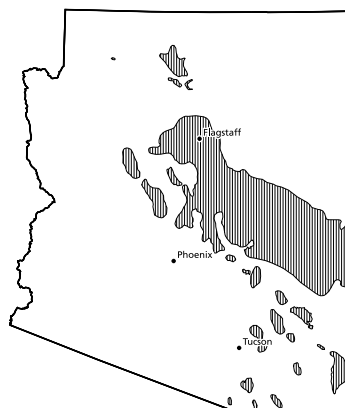

**Black bear distribution**

spring season in select units, the elimination of bear-baiting as a method of take, and unit harvest objectives in which the season is closed after a certain number of female bears are taken.

# Black Bear Harvest Data

## *Historic Summary of Black Bear Harvest<sup>1</sup>*

| Year | Tags Issued       | Sport <sup>2</sup> | Depredation | Other <sup>3</sup> | Total Harvest |
|------|-------------------|--------------------|-------------|--------------------|---------------|
| 1964 | 6638              | 178                | 0           | 0                  | 178           |
| 1965 | 5974              | 131                | 0           | 0                  | 131           |
| 1966 | 5798              | 134                | 0           | 0                  | 134           |
| 1967 | 6344              | 219                | 0           | 0                  | 219           |
| 1968 | 8264              | 242                | 0           | 0                  | 242           |
| 1969 | 8978              | 268                | 0           | 0                  | 268           |
| 1970 | 8454              | 236                | 0           | 0                  | 236           |
| 1971 | 8042              | 241                | 33          | 0                  | 274           |
| 1972 | 6009              | 187                | 17          | 0                  | 204           |
| 1973 | 7162              | 225                | 2           | 0                  | 227           |
| 1974 | 6839              | 202                | 12          | 0                  | 214           |
| 1975 | 6746              | 224                | 9           | 0                  | 233           |
| 1976 | 7055              | 265                | 10          | 0                  | 275           |
| 1977 | 8707              | 309                | 4           | 0                  | 313           |
| 1978 | 8985              | 264                | 6           | 0                  | 270           |
| 1979 | 8833              | 251                | 2           | 0                  | 253           |
| 1980 | 7820              | 255                | 2           | 0                  | 257           |
| 1981 | 8494              | 287                | 5           | 0                  | 292           |
| 1982 | 7178              | 260                | 8           | 0                  | 268           |
| 1983 | 6183              | 273                | 1           | 0                  | 274           |
| 1984 | 5258              | 246                | 5           | 0                  | 251           |
| 1985 | 4917              | 251                | 6           | 0                  | 257           |
| 1986 | 4816              | 182                | 7           | 0                  | 189           |
| 1987 | 5117              | 302                | 9           | 0                  | 311           |
| 1988 | 4272              | 146                | 7           | 2                  | 155           |
| 1989 | 4714              | 271                | 18          | 3                  | 292           |
| 1990 | 3711              | 149                | 11          | 1                  | 161           |
| 1991 | 2843              | 96                 | 4           | 1                  | 101           |
| 1992 | 3217              | 121                | 1           | 0                  | 122           |
| 1993 | 3329              | 117                | 1           | 3                  | 121           |
| 1994 | 4376              | 236                | 2           | 14                 | 252           |
| 1995 | 4586              | 197                | 1           | 0                  | 198           |
| 1996 | 4462              | 254                | 5           | 19                 | 278           |
| 1997 | 4093              | 224                | 2           | 6                  | 232           |
| 1998 | 4461              | 142                | 0           | 13                 | 155           |
| 1999 | 4163              | 181                | 0           | 5                  | 186           |
| 2000 | 4413              | 320                | 2           | 46                 | 368           |
| 2001 | 4293              | 178                | 6           | 6                  | 184           |
| 2002 | 4535              | 230                | 1           | 16                 | 252           |
| 2003 | 4525              | 214                | 5           | 34                 | 249           |
| 2004 | 4521              | 160                | 5           | 11                 | 176           |
| 2005 | 4850              | 158                | 0           | 2                  | 160           |
| 2006 | 4840              | 197                | 1           | 40                 | 238           |
| 2007 | 6110              | 217                | 2           | 19                 | 238           |
| 2008 | 5950 <sup>4</sup> | 179                | 1           | 11                 | 191           |

<sup>1</sup> Data from Indian Reservations are included through 1987 and excluded thereafter.

<sup>2</sup> Estimated from a mail questionnaire from 1964-1987 and from mandatory check-outs from 1988-present.

<sup>3</sup> Includes known kills other than sport or depredation (e.g., highway mortality, capture mortality, and illegal take).

<sup>4</sup> 2008 tags issued is preliminary pending a final audit.

# Black Bear Hunt Data

## 5-Year: 2004-2008 Black Bear Harvest Data<sup>1</sup>

| Unit | Year | Harvest |             |       | Sport Harv.<br>Using Dogs | Sex of Sport Harv. |        | Month of Sport Harvest |      |       |      |      |      |         |
|------|------|---------|-------------|-------|---------------------------|--------------------|--------|------------------------|------|-------|------|------|------|---------|
|      |      | Sport   | Depredation | Other |                           | Male               | Female | Spring <sup>2</sup>    | Aug. | Sept. | Oct. | Nov. | Dec. | Unknown |
| 1    | 2004 | 7       | 1           | 1     | 5                         | 4                  | 3      | 0                      | 2    | 4     | 0    | 1    | 0    | 0       |
| 1    | 2005 | 13      | 0           | 0     | 9                         | 7                  | 6      | 0                      | 3    | 3     | 4    | 2    | 1    | 0       |
| 1    | 2006 | 23      | 0           | 1     | 14                        | 15                 | 8      | 0                      | 9    | 3     | 7    | 4    | 0    | 0       |
| 1    | 2007 | 12      | 0           | 1     | 7                         | 8                  | 4      | 0                      | 10   | 0     | 2    | 0    | 0    | 0       |
| 1    | 2008 | 19      | 0           | 1     | 13                        | 16                 | 3      | 0                      | 17   | 0     | 1    | 1    | 0    | 0       |
| 3B   | 2004 | 8       | 0           | 1     | 7                         | 2                  | 6      | 0                      | 5    | 2     | 1    | 0    | 0    | 0       |
| 3B   | 2005 | 9       | 0           | 0     | 7                         | 8                  | 1      | 0                      | 6    | 1     | 1    | 1    | 0    | 0       |
| 3B   | 2006 | 13      | 0           | 0     | 9                         | 10                 | 3      | 0                      | 4    | 6     | 3    | 0    | 0    | 0       |
| 3B   | 2007 | 3       | 0           | 4     | 1                         | 2                  | 1      | 1                      | 2    | 0     | 0    | 0    | 0    | 0       |
| 3B   | 2008 | 3       | 0           | 1     | 1                         | 2                  | 1      | 1                      | 2    | 0     | 0    | 0    | 0    | 0       |
| 3C   | 2004 | 5       | 0           | 2     | 0                         | 3                  | 2      | 0                      | 0    | 4     | 1    | 0    | 0    | 0       |
| 3C   | 2005 | 4       | 0           | 0     | 0                         | 2                  | 2      | 1                      | 1    | 2     | 0    | 0    | 0    | 0       |
| 3C   | 2006 | 3       | 0           | 3     | 0                         | 2                  | 1      | 2                      | 0    | 0     | 1    | 0    | 0    | 0       |
| 3C   | 2007 | 2       | 0           | 3     | 1                         | 1                  | 1      | 1                      | 0    | 0     | 0    | 0    | 1    | 0       |
| 3C   | 2008 | 3       | 0           | 3     | 0                         | 3                  | 0      | 0                      | 0    | 0     | 2    | 1    | 0    | 0       |
| 4A   | 2004 | 4       | 0           | 1     | 2                         | 3                  | 1      | 0                      | 0    | 0     | 4    | 0    | 0    | 0       |
| 4A   | 2005 | 1       | 0           | 0     | 0                         | 0                  | 1      | 0                      | 0    | 0     | 1    | 0    | 0    | 0       |
| 4A   | 2006 | 8       | 0           | 1     | 7                         | 6                  | 2      | 0                      | 0    | 0     | 8    | 0    | 0    | 0       |
| 4A   | 2007 | 4       | 0           | 1     | 1                         | 2                  | 2      | 0                      | 0    | 0     | 4    | 0    | 0    | 0       |
| 4A   | 2008 | 3       | 0           | 0     | 1                         | 2                  | 1      | 0                      | 0    | 0     | 3    | 0    | 0    | 0       |
| 4B   | 2004 | 2       | 0           | 0     | 2                         | 1                  | 1      | 0                      | 2    | 0     | 0    | 0    | 0    | 0       |
| 4B   | 2005 | 5       | 0           | 0     | 2                         | 4                  | 1      | 0                      | 3    | 2     | 0    | 0    | 0    | 0       |
| 4B   | 2006 | 1       | 0           | 0     | 0                         | 0                  | 1      | 0                      | 0    | 1     | 0    | 0    | 0    | 0       |
| 4B   | 2007 | 2       | 0           | 0     | 0                         | 2                  | 0      | 0                      | 0    | 0     | 2    | 0    | 0    | 0       |
| 4B   | 2008 | 4       | 0           | 0     | 1                         | 2                  | 2      | 0                      | 3    | 1     | 0    | 0    | 0    | 0       |
| 5A   | 2004 | 8       | 0           | 0     | 6                         | 5                  | 3      | 0                      | 0    | 0     | 5    | 3    | 0    | 0       |
| 5A   | 2005 | 10      | 0           | 0     | 5                         | 8                  | 2      | 0                      | 0    | 0     | 8    | 2    | 0    | 0       |
| 5A   | 2006 | 1       | 0           | 0     | 0                         | 1                  | 0      | 0                      | 0    | 0     | 1    | 0    | 0    | 0       |
| 5A   | 2007 | 5       | 0           | 0     | 1                         | 1                  | 3      | 0                      | 0    | 0     | 4    | 0    | 0    | 0       |
| 5A   | 2008 | 8       | 0           | 0     | 5                         | 4                  | 4      | 0                      | 0    | 0     | 8    | 0    | 0    | 0       |
| 5B   | 2004 | 5       | 0           | 0     | 3                         | 3                  | 2      | 0                      | 0    | 0     | 1    | 4    | 0    | 0       |
| 5B   | 2005 | 2       | 0           | 1     | 2                         | 2                  | 0      | 0                      | 0    | 0     | 0    | 2    | 0    | 0       |
| 5B   | 2006 | 3       | 0           | 0     | 2                         | 2                  | 1      | 0                      | 0    | 0     | 3    | 0    | 0    | 0       |
| 5B   | 2007 | 4       | 0           | 0     | 2                         | 3                  | 1      | 0                      | 0    | 0     | 3    | 1    | 0    | 0       |
| 5B   | 2008 | 7       | 0           | 0     | 3                         | 6                  | 1      | 0                      | 0    | 0     | 7    | 0    | 0    | 0       |
| 6A   | 2004 | 5       | 0           | 0     | 2                         | 3                  | 2      | 0                      | 3    | 2     | 0    | 0    | 0    | 0       |
| 6A   | 2005 | 6       | 0           | 0     | 0                         | 5                  | 1      | 0                      | 5    | 0     | 1    | 0    | 0    | 0       |
| 6A   | 2006 | 11      | 0           | 0     | 6                         | 8                  | 3      | 0                      | 0    | 0     | 8    | 3    | 0    | 0       |
| 6A   | 2007 | 10      | 0           | 0     | 2                         | 8                  | 2      | 0                      | 0    | 0     | 8    | 2    | 0    | 0       |
| 6A   | 2008 | 12      | 0           | 0     | 1                         | 9                  | 3      | 0                      | 6    | 0     | 6    | 0    | 0    | 0       |
| 6B   | 2004 | 6       | 0           | 0     | 0                         | 4                  | 2      | 0                      | 3    | 2     | 1    | 0    | 0    | 0       |
| 6B   | 2005 | 3       | 0           | 0     | 0                         | 3                  | 0      | 1                      | 1    | 1     | 0    | 0    | 0    | 0       |
| 6B   | 2006 | 8       | 0           | 0     | 2                         | 5                  | 3      | 0                      | 8    | 0     | 0    | 0    | 0    | 0       |
| 6B   | 2007 | 10      | 0           | 0     | 0                         | 6                  | 4      | 0                      | 9    | 1     | 0    | 0    | 0    | 0       |
| 6B   | 2008 | 4       | 0           | 0     | 1                         | 3                  | 1      | 0                      | 3    | 1     | 0    | 0    | 0    | 0       |
| 7    | 2005 | 2       | 0           | 0     | 0                         | 2                  | 0      | 0                      | 0    | 0     | 0    | 2    | 0    | 0       |
| 7    | 2006 | 1       | 0           | 0     | 0                         | 1                  | 0      | 0                      | 0    | 0     | 1    | 0    | 0    | 0       |
| 7    | 2007 | 1       | 0           | 0     | 0                         | 0                  | 1      | 0                      | 0    | 0     | 1    | 0    | 0    | 0       |
| 7    | 2008 | 3       | 0           | 0     | 0                         | 1                  | 2      | 0                      | 0    | 0     | 3    | 0    | 0    | 0       |
| 8    | 2004 | 4       | 0           | 0     | 1                         | 4                  | 0      | 0                      | 3    | 1     | 0    | 0    | 0    | 0       |
| 8    | 2005 | 3       | 0           | 0     | 1                         | 2                  | 1      | 0                      | 3    | 0     | 0    | 0    | 0    | 0       |
| 8    | 2006 | 5       | 0           | 0     | 3                         | 3                  | 2      | 0                      | 0    | 0     | 3    | 2    | 0    | 0       |
| 8    | 2007 | 9       | 0           | 0     | 1                         | 5                  | 4      | 0                      | 0    | 0     | 9    | 0    | 0    | 0       |
| 8    | 2008 | 6       | 0           | 0     | 1                         | 5                  | 1      | 0                      | 0    | 0     | 4    | 2    | 0    | 0       |
| 9    | 2008 | 1       | 0           | 0     | 0                         | 0                  | 1      | 0                      | 0    | 0     | 1    | 0    | 0    | 0       |
| 11M  | 2004 | 0       | 0           | 1     | —                         | —                  | —      | —                      | —    | —     | —    | —    | —    | —       |
| 11M  | 2006 | 1       | 0           | 0     | 0                         | 0                  | 1      | 0                      | 0    | 1     | 0    | 0    | 0    | 0       |

<sup>1</sup>Excluding data from Indian Reservations.

<sup>2</sup>For Archery-Only Spring Bear hunts ending in August or September, bear harvest occurring in August or September will be reflected in the appropriate month of harvest column. All other spring harvest will be reflected in the Spring column.

# Black Bear Hunt Data

## 5-Year: 2004-2008 Black Bear Harvest Data<sup>1</sup>

| Unit | Year | Harvest |             |       | Sport Harv.<br>Using Dogs | Sex of Sport Harv. |        | Month of Sport Harvest |      |       |      |      |      |         |
|------|------|---------|-------------|-------|---------------------------|--------------------|--------|------------------------|------|-------|------|------|------|---------|
|      |      | Sport   | Depredation | Other |                           | Male               | Female | Spring <sup>2</sup>    | Aug. | Sept. | Oct. | Nov. | Dec. | Unknown |
| 11M  | 2008 | 1       | 0           | 0     | 0                         | 1                  | 0      | 0                      | 1    | 0     | 0    | 0    | 0    | 0       |
| 17A  | 2004 | 1       | 0           | 0     | 1                         | 1                  | 0      | 0                      | 0    | 1     | 0    | 0    | 0    | 0       |
| 17A  | 2005 | 1       | 0           | 0     | 0                         | 0                  | 1      | 0                      | 0    | 0     | 1    | 0    | 0    | 0       |
| 17B  | 2008 | 0       | 1           | 0     | —                         | —                  | —      | —                      | —    | —     | —    | —    | —    | —       |
| 18A  | 2008 | 0       | 0           | 1     | —                         | —                  | —      | —                      | —    | —     | —    | —    | —    | —       |
| 19A  | 2004 | 4       | 0           | 0     | 1                         | 2                  | 2      | 0                      | 0    | 1     | 3    | 0    | 0    | 0       |
| 19A  | 2005 | 3       | 0           | 0     | 0                         | 3                  | 0      | 0                      | 0    | 3     | 0    | 0    | 0    | 0       |
| 19A  | 2006 | 4       | 0           | 0     | 0                         | 3                  | 1      | 0                      | 0    | 0     | 1    | 2    | 1    | 0       |
| 19A  | 2007 | 1       | 0           | 0     | 0                         | 0                  | 1      | 0                      | 0    | 0     | 1    | 0    | 0    | 0       |
| 19A  | 2008 | 4       | 0           | 0     | 0                         | 4                  | 0      | 0                      | 1    | 0     | 3    | 0    | 0    | 0       |
| 20B  | 2007 | 0       | 0           | 1     | —                         | —                  | —      | —                      | —    | —     | —    | —    | —    | —       |
| 21   | 2004 | 7       | 0           | 0     | 0                         | 5                  | 2      | 0                      | 0    | 5     | 2    | 0    | 0    | 0       |
| 21   | 2005 | 2       | 0           | 0     | 0                         | 2                  | 0      | 0                      | 0    | 2     | 0    | 0    | 0    | 0       |
| 21   | 2006 | 2       | 0           | 0     | 0                         | 0                  | 2      | 0                      | 0    | 0     | 2    | 0    | 0    | 0       |
| 21   | 2007 | 5       | 0           | 0     | 0                         | 4                  | 1      | 0                      | 0    | 0     | 5    | 0    | 0    | 0       |
| 21   | 2008 | 6       | 0           | 0     | 0                         | 4                  | 2      | 0                      | 0    | 0     | 6    | 0    | 0    | 0       |
| 22   | 2004 | 15      | 0           | 0     | 7                         | 11                 | 4      | 0                      | 0    | 6     | 5    | 3    | 1    | 0       |
| 22   | 2005 | 12      | 0           | 0     | 2                         | 10                 | 2      | 1                      | 0    | 8     | 0    | 2    | 1    | 0       |
| 22   | 2007 | 0       | 0           | 1     | —                         | —                  | —      | —                      | —    | —     | —    | —    | —    | —       |
| 22N  | 2006 | 7       | 0           | 0     | 2                         | 2                  | 5      | 0                      | 0    | 0     | 6    | 1    | 0    | 0       |
| 22N  | 2007 | 7       | 0           | 0     | 1                         | 4                  | 3      | 0                      | 0    | 0     | 6    | 1    | 0    | 0       |
| 22N  | 2008 | 6       | 0           | 0     | 1                         | 1                  | 5      | 0                      | 0    | 2     | 3    | 1    | 0    | 0       |
| 22S  | 2006 | 4       | 0           | 0     | 0                         | 2                  | 2      | 0                      | 3    | 0     | 1    | 0    | 0    | 0       |
| 22S  | 2007 | 10      | 0           | 0     | 0                         | 8                  | 2      | 0                      | 5    | 0     | 5    | 0    | 0    | 0       |
| 22S  | 2008 | 3       | 0           | 0     | 0                         | 2                  | 1      | 0                      | 2    | 0     | 1    | 0    | 0    | 0       |
| 23   | 2004 | 1       | 0           | 0     | 1                         | 1                  | 0      | 0                      | 0    | 0     | 1    | 0    | 0    | 0       |
| 23   | 2008 | 4       | 0           | 0     | 0                         | 4                  | 0      | 0                      | 0    | 0     | 1    | 3    | 0    | 0       |
| 23N  | 2004 | 16      | 0           | 0     | 12                        | 11                 | 5      | 0                      | 1    | 1     | 14   | 0    | 0    | 0       |
| 23N  | 2005 | 18      | 0           | 0     | 14                        | 10                 | 8      | 0                      | 1    | 2     | 15   | 0    | 0    | 0       |
| 23N  | 2006 | 13      | 0           | 0     | 9                         | 8                  | 5      | 0                      | 0    | 5     | 5    | 3    | 0    | 0       |
| 23N  | 2007 | 19      | 0           | 0     | 12                        | 8                  | 11     | 0                      | 1    | 3     | 14   | 0    | 0    | 0       |
| 23N  | 2008 | 17      | 0           | 1     | 9                         | 12                 | 5      | 0                      | 2    | 1     | 12   | 1    | 1    | 0       |
| 23S  | 2004 | 11      | 0           | 0     | 0                         | 6                  | 5      | 0                      | 0    | 11    | 0    | 0    | 0    | 0       |
| 23S  | 2005 | 15      | 0           | 0     | 1                         | 12                 | 3      | 0                      | 0    | 10    | 4    | 1    | 0    | 0       |
| 23S  | 2006 | 12      | 0           | 1     | 1                         | 6                  | 6      | 0                      | 10   | 0     | 2    | 0    | 0    | 0       |
| 23S  | 2007 | 16      | 0           | 0     | 0                         | 8                  | 8      | 0                      | 11   | 0     | 3    | 0    | 0    | 0       |
| 23S  | 2008 | 11      | 0           | 0     | 0                         | 8                  | 3      | 0                      | 10   | 0     | 1    | 0    | 0    | 0       |
| 24A  | 2004 | 1       | 0           | 0     | 0                         | 1                  | 0      | 0                      | 0    | 0     | 0    | 1    | 0    | 0       |
| 24A  | 2005 | 1       | 0           | 0     | 0                         | 1                  | 0      | 0                      | 0    | 0     | 1    | 0    | 0    | 0       |
| 24A  | 2006 | 8       | 0           | 4     | 0                         | 7                  | 1      | 0                      | 0    | 0     | 7    | 1    | 0    | 0       |
| 24A  | 2007 | 20      | 0           | 0     | 0                         | 10                 | 10     | 1                      | 15   | 0     | 4    | 0    | 0    | 0       |
| 24A  | 2008 | 6       | 0           | 1     | 0                         | 4                  | 2      | 1                      | 5    | 0     | 0    | 0    | 0    | 0       |
| 24B  | 2004 | 2       | 0           | 0     | 0                         | 2                  | 0      | 0                      | 2    | 0     | 0    | 0    | 0    | 0       |
| 24B  | 2006 | 2       | 0           | 0     | 0                         | 1                  | 1      | 0                      | 2    | 0     | 0    | 0    | 0    | 0       |
| 24B  | 2007 | 5       | 0           | 0     | 0                         | 4                  | 1      | 0                      | 5    | 0     | 0    | 0    | 0    | 0       |
| 27   | 2004 | 24      | 2           | 2     | 5                         | 17                 | 7      | 0                      | 10   | 7     | 2    | 4    | 1    | 0       |
| 27   | 2005 | 26      | 0           | 0     | 4                         | 20                 | 6      | 0                      | 5    | 11    | 7    | 1    | 2    | 0       |
| 27   | 2006 | 30      | 0           | 1     | 9                         | 16                 | 14     | 0                      | 0    | 10    | 13   | 7    | 0    | 0       |
| 27   | 2007 | 29      | 2           | 1     | 11                        | 18                 | 11     | 0                      | 1    | 5     | 18   | 5    | 0    | 0       |
| 27   | 2008 | 26      | 0           | 0     | 12                        | 13                 | 13     | 0                      | 4    | 4     | 14   | 3    | 1    | 0       |
| 28   | 2005 | 2       | 0           | 0     | 0                         | 1                  | 1      | 0                      | 0    | 1     | 1    | 0    | 0    | 0       |
| 28   | 2006 | 3       | 0           | 1     | 0                         | 3                  | 0      | 0                      | 0    | 0     | 2    | 1    | 0    | 0       |
| 28   | 2007 | 4       | 0           | 0     | 0                         | 2                  | 2      | 0                      | 0    | 0     | 1    | 3    | 0    | 0       |
| 28   | 2008 | 1       | 0           | 1     | 0                         | 0                  | 1      | 0                      | 0    | 0     | 1    | 0    | 0    | 0       |
| 29   | 2004 | 8       | 0           | 1     | 2                         | 6                  | 2      | 0                      | 0    | 7     | 1    | 0    | 0    | 0       |
| 29   | 2005 | 6       | 0           | 0     | 0                         | 1                  | 5      | 0                      | 0    | 6     | 0    | 0    | 0    | 0       |
| 29   | 2006 | 7       | 0           | 9     | 1                         | 4                  | 3      | 0                      | 0    | 0     | 7    | 0    | 0    | 0       |
| 29   | 2007 | 10      | 0           | 2     | 0                         | 3                  | 7      | 0                      | 0    | 0     | 9    | 0    | 0    | 0       |

<sup>1</sup> Excluding data from Indian Reservations.

<sup>2</sup> For Archery-Only Spring Bear hunts ending in August or September, bear harvest occurring in August or September will be reflected in the appropriate month of harvest column. All other spring harvest will be reflected in the Spring column.



# Black Bear Hunt Data

## 5-Year: 2004-2008 Black Bear Harvest Data<sup>1</sup>

| Unit    | Year | Harvest |             |       | Sport Harv.<br>Using Dogs | Sex of Sport Harv. |        | Month of Sport Harvest |      |       |      |      |      |         |
|---------|------|---------|-------------|-------|---------------------------|--------------------|--------|------------------------|------|-------|------|------|------|---------|
|         |      | Sport   | Depredation | Other |                           | Male               | Female | Spring <sup>2</sup>    | Aug. | Sept. | Oct. | Nov. | Dec. | Unknown |
| 29      | 2008 | 6       | 0           | 0     | 1                         | 5                  | 1      | 0                      | 0    | 0     | 4    | 2    | 0    | 0       |
| 30A     | 2004 | 4       | 0           | 0     | 0                         | 4                  | 0      | 0                      | 0    | 1     | 3    | 0    | 0    | 0       |
| 30A     | 2005 | 0       | 0           | 1     | —                         | —                  | —      | —                      | —    | —     | —    | —    | —    | —       |
| 30A     | 2006 | 3       | 0           | 3     | 2                         | 0                  | 3      | 0                      | 0    | 0     | 3    | 0    | 0    | 0       |
| 30A     | 2007 | 5       | 0           | 0     | 0                         | 3                  | 2      | 0                      | 0    | 0     | 4    | 0    | 0    | 0       |
| 31      | 2004 | 5       | 1           | 0     | 1                         | 5                  | 0      | 0                      | 0    | 4     | 1    | 0    | 0    | 0       |
| 31      | 2005 | 7       | 0           | 0     | 0                         | 5                  | 2      | 1                      | 0    | 5     | 1    | 0    | 0    | 0       |
| 31      | 2006 | 6       | 0           | 1     | 0                         | 3                  | 3      | 0                      | 0    | 0     | 6    | 0    | 0    | 0       |
| 31      | 2007 | 8       | 0           | 0     | 0                         | 3                  | 5      | 0                      | 0    | 0     | 8    | 0    | 0    | 0       |
| 31      | 2008 | 2       | 0           | 0     | 0                         | 1                  | 1      | 0                      | 0    | 0     | 2    | 0    | 0    | 0       |
| 32      | 2004 | 4       | 1           | 0     | 0                         | 2                  | 2      | 0                      | 0    | 4     | 0    | 0    | 0    | 0       |
| 32      | 2005 | 3       | 0           | 0     | 0                         | 3                  | 0      | 0                      | 2    | 1     | 0    | 0    | 0    | 0       |
| 32      | 2006 | 7       | 1           | 1     | 1                         | 4                  | 3      | 0                      | 0    | 4     | 3    | 0    | 0    | 0       |
| 32      | 2007 | 6       | 0           | 1     | 0                         | 3                  | 3      | 1                      | 0    | 0     | 5    | 0    | 0    | 0       |
| 32      | 2008 | 4       | 0           | 0     | 0                         | 2                  | 2      | 0                      | 0    | 2     | 2    | 0    | 0    | 0       |
| 33      | 2004 | 0       | 0           | 1     | —                         | —                  | —      | —                      | —    | —     | —    | —    | —    | —       |
| 33      | 2005 | 1       | 0           | 0     | 1                         | 0                  | 1      | 0                      | 0    | 0     | 0    | 0    | 1    | 0       |
| 33      | 2006 | 0       | 0           | 2     | —                         | —                  | —      | —                      | —    | —     | —    | —    | —    | —       |
| 33      | 2007 | 0       | 0           | 1     | —                         | —                  | —      | —                      | —    | —     | —    | —    | —    | —       |
| 33      | 2008 | 2       | 0           | 0     | 0                         | 2                  | 0      | 2                      | 0    | 0     | 0    | 0    | 0    | 0       |
| 34A     | 2004 | 1       | 0           | 1     | 0                         | 0                  | 1      | 1                      | 0    | 0     | 0    | 0    | 0    | 0       |
| 34A     | 2005 | 2       | 0           | 0     | 0                         | 2                  | 0      | 2                      | 0    | 0     | 0    | 0    | 0    | 0       |
| 34A     | 2006 | 4       | 0           | 0     | 0                         | 3                  | 1      | 4                      | 0    | 0     | 0    | 0    | 0    | 0       |
| 34A     | 2007 | 5       | 0           | 3     | 0                         | 3                  | 2      | 4                      | 1    | 0     | 0    | 0    | 0    | 0       |
| 34A     | 2008 | 3       | 0           | 0     | 0                         | 2                  | 1      | 3                      | 0    | 0     | 0    | 0    | 0    | 0       |
| 34B     | 2008 | 0       | 0           | 1     | —                         | —                  | —      | —                      | —    | —     | —    | —    | —    | —       |
| 35A     | 2004 | 1       | 0           | 0     | 0                         | 0                  | 1      | 1                      | 0    | 0     | 0    | 0    | 0    | 0       |
| 35A     | 2005 | 1       | 0           | 0     | 0                         | 1                  | 0      | 1                      | 0    | 0     | 0    | 0    | 0    | 0       |
| 35A     | 2006 | 6       | 0           | 9     | 2                         | 2                  | 4      | 1                      | 0    | 4     | 0    | 1    | 0    | 0       |
| 35A     | 2007 | 5       | 0           | 0     | 0                         | 2                  | 3      | 4                      | 0    | 0     | 0    | 0    | 1    | 0       |
| 35A     | 2008 | 4       | 0           | 0     | 0                         | 4                  | 0      | 4                      | 0    | 0     | 0    | 0    | 0    | 0       |
| 35B     | 2004 | 1       | 0           | 0     | 0                         | 1                  | 0      | 1                      | 0    | 0     | 0    | 0    | 0    | 0       |
| 35B     | 2006 | 1       | 0           | 0     | 0                         | 1                  | 0      | 0                      | 1    | 0     | 0    | 0    | 0    | 0       |
| 38M     | 2006 | 0       | 0           | 2     | —                         | —                  | —      | —                      | —    | —     | —    | —    | —    | —       |
| 38M     | 2008 | 0       | 0           | 1     | —                         | —                  | —      | —                      | —    | —     | —    | —    | —    | —       |
| Unknown | 2006 | 0       | 0           | 1     | —                         | —                  | —      | —                      | —    | —     | —    | —    | —    | —       |
| Total   | 2004 | 160     | 5           | 11    | 58                        | 107                | 53     | 3                      | 31   | 63    | 45   | 16   | 2    | 0       |
| Total   | 2005 | 158     | 0           | 2     | 48                        | 114                | 44     | 7                      | 30   | 58    | 45   | 13   | 5    | 0       |
| Total   | 2006 | 197     | 1           | 40    | 70                        | 118                | 79     | 7                      | 37   | 34    | 93   | 25   | 1    | 0       |
| Total   | 2007 | 217     | 2           | 19    | 40                        | 121                | 95     | 12                     | 60   | 9     | 116  | 12   | 2    | 0       |
| Total   | 2008 | 179     | 1           | 11    | 50                        | 122                | 57     | 11                     | 56   | 11    | 85   | 14   | 2    | 0       |
| Percent | 2004 |         |             |       | 36                        | 67                 | 33     | 2                      | 19   | 39    | 28   | 10   | 1    |         |
| Percent | 2005 |         |             |       | 30                        | 72                 | 28     | 4                      | 19   | 37    | 28   | 8    | 3    |         |
| Percent | 2006 |         |             |       | 36                        | 60                 | 40     | 4                      | 19   | 17    | 47   | 13   | 1    |         |
| Percent | 2007 |         |             |       | 18                        | 56                 | 44     | 6                      | 28   | 4     | 53   | 6    | 1    |         |
| Percent | 2008 |         |             |       | 28                        | 68                 | 32     | 6                      | 31   | 6     | 47   | 8    | 1    |         |

<sup>1</sup> Excluding data from Indian Reservations.

<sup>2</sup> For Archery-Only Spring Bear hunts ending in August or September, bear harvest occurring in August or September will be reflected in the appropriate month of harvest column. All other spring harvest will be reflected in the Spring column.

---

# Mountain Lion (*Felis concolor*)

---

## *Natural History*

In Arizona, mountain lions are absent only from the extremely arid southwest and those areas heavily impacted by human development. In general, the distribution of mountain lions in the state corresponds with the distribution of the animal's major prey species—mule and white-tailed deer.

Mountain lions may breed at any time of the year, and consequently litters may be born in any month. Summer is the peak period of kitten births, however, with litter sizes of two, three, and four being common. The kittens remain with their mother for 15 to 22 months learning the skills necessary for survival. Juvenile males tend to disperse long distances compared to

the relatively short distances for young females. Mountain lions are essentially solitary animals. Adult females may be accompanied by kittens, but are normally not associated with other adult animals except for mating purposes. Mature males weigh up to 150 pounds and females 100 pounds. The statewide population is estimated at 2,500 mountain lions.

While deer are the principal mountain lion prey species in Arizona, javelina, elk, and/or livestock can be major components of the diet. Mountain lions will almost always attempt to cover the uneaten portion of a kill with leaves or other debris. An entire deer can be consumed in two nights. An experienced observer is usually able to detect the presence of a mountain lion in an area through the presence of tracks, scrapes, kills, or other sign.

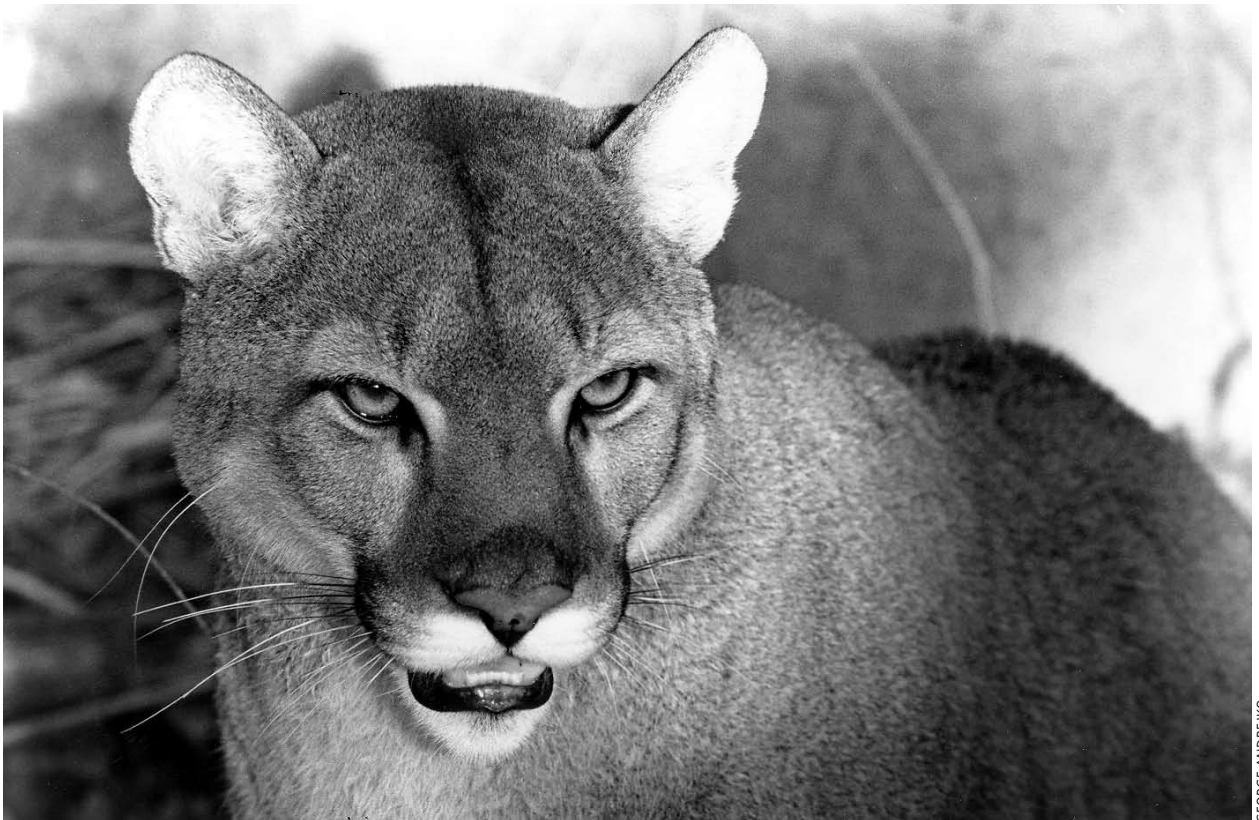

GEORGE ANDREIKO

## Mountain Lion

---

Mountain lions are specialized predators and consequently do not normally exist in high concentrations. They maintain spatial separation between each other, thereby assuring that each individual has the resources necessary to survive. If these separations are not main-

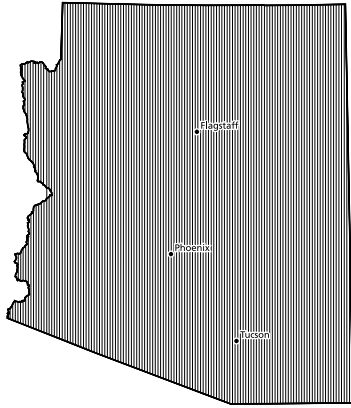

**Mountain lion distribution**

tained, mountain lions will kill each other, which is the normal method of population regulation in undisturbed mountain lion populations. The cryptic system of boundary marking employed by resident mountain lions serves to provide for mutual avoidance and survival. Mountain lions in Arizona

feed almost exclusively on large prey, usually killing one deer-sized animal every six to 12 days. Considerable skill in executing stalks and more importantly in consummating the kill is required to avoid debilitating injury.

### *Hunt History*

Lions were classified as a “predatory animal” by the territorial legislature and were subject to a statewide bounty of \$50 dollars in 1919. This status continued until 1970 when the mountain lion was classified as a big-game animal and a tag was required to take one, even though ranchers and their agents could still take a depredating lion. A mandatory checkout procedure and other reporting requirements were instituted in 1982. Reporting information indicates that lion harvests have gradually increased over time. Recently, the annual kill has ranged between 250 and 350 animals, of which approximately 15 percent were taken by predator control agents.

# Mountain Lion Harvest Data

## Historic Summary of Mountain Lion Harvest<sup>1</sup>

| Year | Tags Issued        | Harvest            |                          |                    |       | Sport Harvest<br>Using Dogs | Sex of Sport Harvest |        |              |
|------|--------------------|--------------------|--------------------------|--------------------|-------|-----------------------------|----------------------|--------|--------------|
|      |                    | Sport <sup>2</sup> | Depredation <sup>3</sup> | Other <sup>4</sup> | Total |                             | Male                 | Female | Unclassified |
| 1951 | —                  | —                  | 181                      | 0                  | 181   | —                           | —                    | —      | —            |
| 1952 | —                  | —                  | 198                      | 0                  | 198   | —                           | —                    | —      | —            |
| 1953 | —                  | —                  | 200                      | 0                  | 200   | —                           | —                    | —      | —            |
| 1954 | —                  | —                  | 201                      | 0                  | 201   | —                           | —                    | —      | —            |
| 1955 | —                  | —                  | 230                      | 0                  | 230   | —                           | —                    | —      | —            |
| 1956 | —                  | —                  | 189                      | 0                  | 189   | —                           | —                    | —      | —            |
| 1957 | —                  | —                  | 266                      | 0                  | 266   | —                           | —                    | —      | —            |
| 1958 | —                  | —                  | 264                      | 0                  | 264   | —                           | —                    | —      | —            |
| 1959 | —                  | —                  | 243                      | 0                  | 243   | —                           | —                    | —      | —            |
| 1960 | —                  | —                  | 215                      | 0                  | 215   | —                           | —                    | —      | —            |
| 1961 | —                  | —                  | 242                      | 0                  | 242   | —                           | —                    | —      | —            |
| 1962 | —                  | —                  | 231                      | 0                  | 231   | —                           | —                    | —      | —            |
| 1963 | —                  | —                  | 197                      | 0                  | 197   | —                           | —                    | —      | —            |
| 1964 | —                  | —                  | 267                      | 0                  | 267   | —                           | —                    | —      | —            |
| 1965 | —                  | —                  | 286                      | 0                  | 286   | —                           | —                    | —      | —            |
| 1966 | —                  | —                  | 257                      | 0                  | 257   | —                           | —                    | —      | —            |
| 1967 | —                  | —                  | 257                      | 0                  | 257   | —                           | —                    | —      | —            |
| 1968 | —                  | —                  | 226                      | 0                  | 226   | —                           | —                    | —      | —            |
| 1969 | —                  | —                  | 217                      | 0                  | 217   | —                           | —                    | —      | —            |
| 1970 | —                  | —                  | 278                      | 0                  | 278   | —                           | —                    | —      | —            |
| 1971 | 3835               | 172                | 0                        | 0                  | 172   | —                           | —                    | —      | —            |
| 1972 | 4214               | 120                | 48                       | 0                  | 168   | —                           | —                    | —      | —            |
| 1973 | 4917               | 190                | 15                       | 0                  | 205   | —                           | —                    | —      | —            |
| 1974 | 4896               | 172                | 22                       | 0                  | 194   | —                           | —                    | —      | —            |
| 1975 | 5460               | 219                | 19                       | 1                  | 239   | —                           | —                    | —      | —            |
| 1976 | 6261               | 238                | 14                       | 0                  | 252   | —                           | —                    | —      | —            |
| 1977 | 7498               | 248                | 4                        | 0                  | 252   | —                           | —                    | —      | —            |
| 1978 | 7964               | 229                | 12                       | 0                  | 241   | —                           | —                    | —      | —            |
| 1979 | 7938               | 283                | 7                        | 0                  | 290   | —                           | —                    | —      | —            |
| 1980 | 7799               | 204                | 2                        | 0                  | 206   | —                           | —                    | —      | —            |
| 1981 | 7871               | 191                | 9                        | 1                  | 201   | —                           | —                    | —      | —            |
| 1982 | 8069               | 316                | 8                        | 1                  | 325   | —                           | —                    | —      | —            |
| 1983 | 7004               | 221                | 7                        | 1                  | 229   | —                           | —                    | —      | —            |
| 1984 | 6876               | 184                | 9                        | 0                  | 193   | —                           | —                    | —      | —            |
| 1985 | 7523               | 246                | 19                       | 7                  | 272   | —                           | —                    | —      | —            |
| 1986 | 7936               | 191                | 25                       | 0                  | 216   | —                           | —                    | —      | —            |
| 1987 | 8304               | 205                | 31                       | 5                  | 241   | 127                         | 109                  | 89     | 7            |
| 1988 | 8495               | 183                | 24                       | 1                  | 208   | 104                         | 82                   | 99     | 2            |
| 1989 | 3656               | 130                | 65                       | 1                  | 196   | 85                          | 77                   | 51     | 2            |
| 1990 | 3046               | 188                | 40                       | 1                  | 229   | 125                         | 108                  | 74     | 6            |
| 1991 | 3038               | 179                | 25                       | 1                  | 205   | 115                         | 107                  | 71     | 1            |
| 1992 | 3177               | 201                | 28                       | 5                  | 234   | 147                         | 113                  | 83     | 5            |
| 1993 | 3407               | 188                | 38                       | 12                 | 238   | 117                         | 106                  | 81     | 1            |
| 1994 | 4156               | 215                | 35                       | 6                  | 256   | 128                         | 120                  | 93     | 2            |
| 1995 | 4859               | 234                | 31                       | 1                  | 266   | 150                         | 126                  | 103    | 5            |
| 1996 | 5552               | 225                | 38                       | 2                  | 265   | 131                         | 119                  | 106    | 0            |
| 1997 | 5657               | 269                | 48                       | 3                  | 320   | 182                         | 134                  | 134    | 1            |
| 1998 | 6590               | 289                | 52                       | 1                  | 342   | 192                         | 150                  | 136    | 3            |
| 1999 | 6885               | 247                | 49                       | 2                  | 298   | 161                         | 126                  | 120    | 1            |
| 2000 | 7478               | 276                | 53                       | 0                  | 329   | 193                         | 133                  | 141    | 2            |
| 2001 | 8109               | 326                | 58                       | 0                  | 384   | 214                         | 176                  | 144    | 6            |
| 2002 | 8274               | 264                | 50                       | 5                  | 319   | 175                         | 144                  | 116    | 4            |
| 2003 | 8089               | 218                | 66                       | 12                 | 296   | 164                         | 107                  | 111    | 0            |
| 2004 | 8964               | 247                | 31                       | 1                  | 279   | 167                         | 123                  | 122    | 2            |
| 2005 | 10117              | 204                | 41                       | 0                  | 245   | 120                         | 103                  | 101    | 0            |
| 2006 | 10931              | 221                | 36                       | 5                  | 262   | 136                         | 108                  | 113    | 0            |
| 2007 | 10995              | 256                | 28                       | 5                  | 289   | 169                         | 146                  | 109    | 1            |
| 2008 | 10629 <sup>5</sup> | 264                | 42                       | 5                  | 311   | 168                         | 142                  | 120    | 2            |

<sup>1</sup>Data from Indian Reservations are included through 1987 and excluded thereafter.

<sup>2</sup>Estimated from a mail questionnaire from 1971-1987 and from mandatory check-outs from 1988-present.

<sup>3</sup>As reported by Arizona Livestock Sanitary Board through June 30, 1970, and reported stock-killers since 1971.

<sup>4</sup>Includes known kills other than sport or depredation (e.g., highway mortality, capture mortality, and illegal take).

<sup>5</sup>2008 tags sold is preliminary.

# Mountain Lion Hunt Data

## 5-Year: 2004-2008 Mountain Lion Hunt Data

| Unit | Year | Harvest |             |       | Sport Harvest Using Dogs | Sex of Sport Harvest |        | Month of Sport Harvest |              |               |              |
|------|------|---------|-------------|-------|--------------------------|----------------------|--------|------------------------|--------------|---------------|--------------|
|      |      | Sport   | Depredation | Other |                          | Male                 | Female | Jan. to March          | Apr. to June | July to Sept. | Oct. to Dec. |
| 1    | 2004 | 2       | 0           | 0     | 2                        | 1                    | 1      | 0                      | 0            | 0             | 2            |
| 1    | 2005 | 2       | 0           | 0     | 2                        | 2                    | 0      | 2                      | 0            | 0             | 0            |
| 1    | 2006 | 3       | 0           | 0     | 2                        | 3                    | 0      | 0                      | 0            | 0             | 3            |
| 1    | 2007 | 3       | 0           | 0     | 3                        | 1                    | 2      | 0                      | 0            | 0             | 3            |
| 1    | 2008 | 5       | 0           | 0     | 3                        | 1                    | 4      | 0                      | 1            | 1             | 3            |
| 2B   | 2004 | 3       | 0           | 0     | 3                        | 1                    | 2      | 1                      | 1            | 0             | 1            |
| 2B   | 2006 | 1       | 0           | 0     | 0                        | 0                    | 1      | 0                      | 0            | 0             | 1            |
| 3B   | 2006 | 1       | 0           | 0     | 0                        | 0                    | 1      | 0                      | 0            | 0             | 1            |
| 3B   | 2007 | 2       | 0           | 0     | 2                        | 2                    | 0      | 1                      | 0            | 0             | 1            |
| 3B   | 2008 | 1       | 0           | 0     | 1                        | 1                    | 0      | 0                      | 0            | 0             | 1            |
| 3C   | 2004 | 2       | 0           | 0     | 1                        | 1                    | 1      | 1                      | 0            | 0             | 1            |
| 3C   | 2005 | 3       | 0           | 0     | 1                        | 2                    | 1      | 2                      | 0            | 0             | 1            |
| 3C   | 2006 | 3       | 0           | 0     | 3                        | 2                    | 1      | 1                      | 1            | 0             | 1            |
| 3C   | 2007 | 2       | 0           | 0     | 2                        | 2                    | 0      | 2                      | 0            | 0             | 0            |
| 3C   | 2008 | 1       | 0           | 0     | 1                        | 1                    | 0      | 0                      | 0            | 0             | 1            |
| 4A   | 2004 | 2       | 0           | 0     | 1                        | 1                    | 1      | 0                      | 0            | 0             | 2            |
| 4A   | 2005 | 1       | 0           | 0     | 1                        | 1                    | 0      | 1                      | 0            | 0             | 0            |
| 4A   | 2006 | 3       | 0           | 0     | 2                        | 3                    | 0      | 2                      | 0            | 1             | 0            |
| 4B   | 2004 | 3       | 0           | 0     | 3                        | 2                    | 1      | 3                      | 0            | 0             | 0            |
| 4B   | 2005 | 1       | 0           | 0     | 0                        | 0                    | 1      | 0                      | 1            | 0             | 0            |
| 4B   | 2006 | 2       | 0           | 0     | 1                        | 1                    | 1      | 1                      | 0            | 1             | 0            |
| 4B   | 2007 | 3       | 0           | 0     | 3                        | 2                    | 1      | 2                      | 0            | 0             | 1            |
| 4B   | 2008 | 1       | 0           | 0     | 1                        | 1                    | 0      | 1                      | 0            | 0             | 0            |
| 5A   | 2005 | 1       | 0           | 0     | 0                        | 1                    | 0      | 0                      | 1            | 0             | 0            |
| 5A   | 2006 | 1       | 0           | 0     | 1                        | 0                    | 1      | 0                      | 0            | 0             | 1            |
| 5A   | 2008 | 1       | 0           | 0     | 1                        | 1                    | 0      | 0                      | 0            | 1             | 0            |
| 5B   | 2004 | 2       | 0           | 0     | 2                        | 2                    | 0      | 2                      | 0            | 0             | 0            |
| 5B   | 2005 | 2       | 0           | 0     | 0                        | 0                    | 2      | 0                      | 0            | 1             | 1            |
| 5B   | 2006 | 4       | 0           | 0     | 2                        | 4                    | 0      | 3                      | 0            | 0             | 1            |
| 5B   | 2007 | 4       | 0           | 0     | 4                        | 2                    | 2      | 3                      | 0            | 0             | 1            |
| 5B   | 2008 | 1       | 0           | 1     | 1                        | 0                    | 1      | 1                      | 0            | 0             | 0            |
| 6A   | 2004 | 6       | 0           | 0     | 4                        | 4                    | 2      | 5                      | 0            | 0             | 1            |
| 6A   | 2005 | 11      | 0           | 0     | 9                        | 4                    | 7      | 8                      | 1            | 1             | 1            |
| 6A   | 2006 | 6       | 0           | 1     | 6                        | 4                    | 2      | 4                      | 0            | 0             | 2            |
| 6A   | 2007 | 6       | 0           | 0     | 4                        | 3                    | 3      | 3                      | 1            | 1             | 1            |
| 6A   | 2008 | 2       | 0           | 0     | 0                        | 0                    | 2      | 0                      | 0            | 0             | 2            |
| 6AS  | 2005 | 1       | 0           | 0     | 0                        | 0                    | 1      | 0                      | 0            | 0             | 1            |
| 6AS  | 2006 | 4       | 0           | 1     | 1                        | 1                    | 3      | 1                      | 1            | 0             | 2            |
| 6AS  | 2007 | 4       | 0           | 0     | 3                        | 3                    | 1      | 3                      | 0            | 1             | 0            |
| 6AS  | 2008 | 6       | 0           | 0     | 2                        | 4                    | 2      | 1                      | 1            | 3             | 1            |
| 6B   | 2004 | 4       | 0           | 0     | 4                        | 1                    | 3      | 4                      | 0            | 0             | 0            |
| 6B   | 2006 | 4       | 0           | 0     | 2                        | 0                    | 4      | 1                      | 0            | 1             | 2            |
| 6B   | 2007 | 3       | 0           | 0     | 2                        | 1                    | 2      | 2                      | 0            | 1             | 0            |
| 7    | 2004 | 11      | 0           | 0     | 11                       | 7                    | 4      | 6                      | 0            | 0             | 5            |
| 7    | 2005 | 1       | 0           | 0     | 1                        | 1                    | 0      | 1                      | 0            | 0             | 0            |
| 7    | 2006 | 6       | 0           | 0     | 5                        | 4                    | 2      | 2                      | 0            | 0             | 4            |
| 7    | 2007 | 8       | 0           | 0     | 7                        | 5                    | 3      | 5                      | 0            | 0             | 3            |
| 7    | 2008 | 4       | 0           | 0     | 3                        | 4                    | 0      | 3                      | 0            | 1             | 0            |
| 8    | 2004 | 5       | 0           | 0     | 3                        | 1                    | 4      | 3                      | 0            | 1             | 1            |
| 8    | 2005 | 2       | 0           | 0     | 1                        | 2                    | 0      | 1                      | 0            | 0             | 1            |
| 8    | 2006 | 4       | 0           | 0     | 3                        | 2                    | 2      | 3                      | 0            | 0             | 1            |
| 8    | 2007 | 6       | 0           | 0     | 5                        | 4                    | 2      | 3                      | 0            | 1             | 2            |
| 8    | 2008 | 7       | 0           | 0     | 6                        | 6                    | 1      | 3                      | 0            | 1             | 3            |
| 9    | 2004 | 5       | 0           | 0     | 4                        | 3                    | 2      | 4                      | 0            | 0             | 1            |
| 9    | 2005 | 2       | 0           | 0     | 1                        | 1                    | 1      | 1                      | 0            | 0             | 1            |
| 9    | 2006 | 5       | 0           | 0     | 4                        | 3                    | 2      | 3                      | 0            | 1             | 1            |
| 9    | 2007 | 5       | 0           | 0     | 2                        | 1                    | 4      | 2                      | 0            | 0             | 3            |
| 9    | 2008 | 2       | 0           | 0     | 2                        | 0                    | 2      | 1                      | 0            | 0             | 1            |
| 10   | 2004 | 4       | 0           | 0     | 3                        | 2                    | 2      | 3                      | 1            | 0             | 0            |
| 10   | 2005 | 8       | 0           | 0     | 3                        | 3                    | 5      | 4                      | 0            | 0             | 4            |
| 10   | 2006 | 3       | 0           | 0     | 1                        | 0                    | 3      | 2                      | 0            | 0             | 1            |
| 10   | 2007 | 8       | 0           | 0     | 1                        | 4                    | 4      | 3                      | 1            | 0             | 4            |

# Mountain Lion Hunt Data

## 5-Year: 2004-2008 Mountain Lion Hunt Data

| Unit | Year | Harvest |             |       | Sport Harvest Using Dogs | Sex of Sport Harvest |        | Month of Sport Harvest |              |               |              |
|------|------|---------|-------------|-------|--------------------------|----------------------|--------|------------------------|--------------|---------------|--------------|
|      |      | Sport   | Depredation | Other |                          | Male                 | Female | Jan. to March          | Apr. to June | July to Sept. | Oct. to Dec. |
| 10   | 2008 | 11      | 0           | 0     | 8                        | 6                    | 5      | 9                      | 0            | 0             | 2            |
| 11M  | 2006 | 1       | 0           | 0     | 1                        | 0                    | 1      | 0                      | 0            | 0             | 1            |
| 11M  | 2007 | 2       | 0           | 0     | 2                        | 2                    | 0      | 1                      | 1            | 0             | 0            |
| 11M  | 2008 | 1       | 0           | 0     | 1                        | 1                    | 0      | 0                      | 0            | 0             | 1            |
| 12A  | 2004 | 8       | 0           | 0     | 8                        | 4                    | 4      | 4                      | 0            | 0             | 4            |
| 12A  | 2005 | 5       | 0           | 0     | 4                        | 3                    | 2      | 0                      | 0            | 0             | 5            |
| 12A  | 2006 | 8       | 0           | 0     | 7                        | 4                    | 4      | 4                      | 0            | 1             | 3            |
| 12A  | 2007 | 11      | 0           | 0     | 11                       | 6                    | 5      | 3                      | 0            | 0             | 8            |
| 12A  | 2008 | 9       | 0           | 0     | 5                        | 5                    | 4      | 3                      | 0            | 0             | 5            |
| 12B  | 2004 | 1       | 0           | 0     | 1                        | 1                    | 0      | 0                      | 0            | 0             | 1            |
| 12B  | 2006 | 1       | 0           | 0     | 0                        | 1                    | 0      | 0                      | 0            | 0             | 1            |
| 13A  | 2005 | 2       | 0           | 0     | 2                        | 0                    | 2      | 0                      | 0            | 1             | 1            |
| 13A  | 2008 | 1       | 0           | 0     | 0                        | 1                    | 0      | 1                      | 0            | 0             | 0            |
| 13B  | 2004 | 3       | 0           | 0     | 3                        | 2                    | 1      | 3                      | 0            | 0             | 0            |
| 13B  | 2005 | 1       | 0           | 0     | 1                        | 1                    | 0      | 1                      | 0            | 0             | 0            |
| 13B  | 2006 | 1       | 0           | 0     | 1                        | 1                    | 0      | 1                      | 0            | 0             | 0            |
| 13BS | 2006 | 2       | 0           | 0     | 1                        | 2                    | 0      | 1                      | 1            | 0             | 0            |
| 13BS | 2007 | 1       | 0           | 0     | 0                        | 0                    | 1      | 0                      | 0            | 0             | 1            |
| 13BS | 2008 | 2       | 0           | 0     | 2                        | 0                    | 2      | 2                      | 0            | 0             | 0            |
| 15A  | 2007 | 1       | 0           | 0     | 0                        | 1                    | 0      | 1                      | 0            | 0             | 0            |
| 15A  | 2008 | 1       | 0           | 0     | 0                        | 0                    | 1      | 1                      | 0            | 0             | 0            |
| 15B  | 2005 | 1       | 0           | 0     | 0                        | 0                    | 1      | 0                      | 0            | 0             | 1            |
| 15B  | 2007 | 1       | 0           | 0     | 0                        | 0                    | 1      | 0                      | 1            | 0             | 0            |
| 15B  | 2008 | 1       | 0           | 0     | 1                        | 0                    | 1      | 0                      | 1            | 0             | 0            |
| 15BW | 2005 | 1       | 0           | 0     | 1                        | 0                    | 1      | 1                      | 0            | 0             | 0            |
| 15C  | 2004 | 1       | 0           | 0     | 1                        | 1                    | 0      | 0                      | 1            | 0             | 0            |
| 15C  | 2006 | 0       | 0           | 1     | —                        | —                    | —      | —                      | —            | —             | —            |
| 15CS | 2008 | 0       | 0           | 1     | —                        | —                    | —      | —                      | —            | —             | —            |
| 15D  | 2005 | 1       | 0           | 0     | 1                        | 1                    | 0      | 1                      | 0            | 0             | 0            |
| 15D  | 2006 | 1       | 0           | 0     | 0                        | 0                    | 1      | 1                      | 0            | 0             | 0            |
| 16A  | 2004 | 3       | 0           | 0     | 3                        | 0                    | 3      | 0                      | 0            | 0             | 3            |
| 16A  | 2007 | 2       | 0           | 1     | 2                        | 1                    | 1      | 2                      | 0            | 0             | 0            |
| 16A  | 2008 | 7       | 0           | 1     | 7                        | 5                    | 2      | 2                      | 2            | 0             | 3            |
| 16AS | 2007 | 1       | 0           | 0     | 1                        | 1                    | 0      | 0                      | 1            | 0             | 0            |
| 17A  | 2004 | 10      | 1           | 0     | 8                        | 2                    | 8      | 8                      | 0            | 0             | 2            |
| 17A  | 2005 | 8       | 0           | 0     | 5                        | 4                    | 4      | 5                      | 0            | 0             | 3            |
| 17A  | 2006 | 1       | 1           | 0     | 1                        | 0                    | 1      | 0                      | 0            | 0             | 1            |
| 17A  | 2007 | 3       | 0           | 0     | 2                        | 3                    | 0      | 2                      | 0            | 0             | 1            |
| 17A  | 2008 | 8       | 0           | 0     | 6                        | 6                    | 2      | 4                      | 1            | 0             | 3            |
| 17B  | 2004 | 7       | 1           | 0     | 5                        | 2                    | 5      | 1                      | 1            | 0             | 5            |
| 17B  | 2005 | 5       | 4           | 0     | 5                        | 3                    | 2      | 3                      | 0            | 0             | 2            |
| 17B  | 2006 | 7       | 0           | 0     | 6                        | 5                    | 2      | 4                      | 2            | 1             | 0            |
| 17B  | 2007 | 7       | 1           | 0     | 6                        | 6                    | 1      | 6                      | 0            | 0             | 1            |
| 17B  | 2008 | 4       | 3           | 0     | 2                        | 3                    | 1      | 2                      | 0            | 0             | 2            |
| 18A  | 2004 | 2       | 0           | 0     | 2                        | 1                    | 1      | 2                      | 0            | 0             | 0            |
| 18A  | 2005 | 2       | 0           | 0     | 1                        | 1                    | 1      | 1                      | 0            | 1             | 0            |
| 18A  | 2006 | 4       | 0           | 0     | 2                        | 1                    | 3      | 2                      | 0            | 0             | 2            |
| 18A  | 2008 | 1       | 1           | 0     | 1                        | 0                    | 1      | 1                      | 0            | 0             | 0            |
| 18B  | 2004 | 6       | 2           | 0     | 3                        | 3                    | 3      | 2                      | 1            | 0             | 3            |
| 18B  | 2005 | 4       | 2           | 0     | 2                        | 1                    | 3      | 1                      | 1            | 0             | 2            |
| 18B  | 2006 | 8       | 3           | 0     | 5                        | 3                    | 5      | 2                      | 2            | 0             | 4            |
| 18B  | 2007 | 8       | 3           | 0     | 6                        | 4                    | 4      | 2                      | 0            | 3             | 3            |
| 18B  | 2008 | 5       | 1           | 0     | 2                        | 1                    | 4      | 3                      | 0            | 1             | 1            |
| 18BS | 2004 | 2       | 0           | 0     | 2                        | 1                    | 1      | 2                      | 0            | 0             | 0            |
| 18BS | 2007 | 1       | 0           | 0     | 0                        | 1                    | 0      | 0                      | 0            | 0             | 1            |
| 18BS | 2008 | 2       | 0           | 0     | 2                        | 1                    | 1      | 1                      | 1            | 0             | 0            |
| 19A  | 2004 | 4       | 0           | 0     | 3                        | 1                    | 3      | 2                      | 1            | 0             | 1            |
| 19A  | 2005 | 3       | 1           | 0     | 3                        | 1                    | 2      | 3                      | 0            | 0             | 0            |
| 19A  | 2006 | 7       | 0           | 0     | 3                        | 2                    | 5      | 5                      | 2            | 0             | 0            |
| 19A  | 2007 | 3       | 0           | 0     | 3                        | 2                    | 1      | 1                      | 0            | 0             | 2            |
| 19A  | 2008 | 2       | 0           | 0     | 2                        | 1                    | 1      | 1                      | 0            | 0             | 1            |
| 19B  | 2004 | 1       | 0           | 0     | 0                        | 0                    | 1      | 0                      | 0            | 0             | 1            |

# Mountain Lion Hunt Data

## 5-Year: 2004-2008 Mountain Lion Hunt Data

| Unit | Year | Harvest |             |       | Sport Harvest Using Dogs | Sex of Sport Harvest |        | Month of Sport Harvest |              |               |              |
|------|------|---------|-------------|-------|--------------------------|----------------------|--------|------------------------|--------------|---------------|--------------|
|      |      | Sport   | Depredation | Other |                          | Male                 | Female | Jan. to March          | Apr. to June | July to Sept. | Oct. to Dec. |
| 19B  | 2005 | 1       | 0           | 0     | 0                        | 0                    | 1      | 0                      | 0            | 0             | 1            |
| 19B  | 2006 | 1       | 0           | 0     | 0                        | 0                    | 1      | 0                      | 0            | 0             | 1            |
| 19B  | 2008 | 2       | 0           | 0     | 0                        | 0                    | 2      | 1                      | 0            | 0             | 1            |
| 20A  | 2004 | 9       | 0           | 0     | 6                        | 6                    | 3      | 6                      | 0            | 0             | 3            |
| 20A  | 2005 | 5       | 0           | 0     | 4                        | 3                    | 2      | 4                      | 0            | 0             | 1            |
| 20A  | 2006 | 7       | 0           | 0     | 6                        | 3                    | 4      | 5                      | 1            | 0             | 1            |
| 20A  | 2007 | 5       | 0           | 0     | 4                        | 4                    | 1      | 3                      | 0            | 0             | 2            |
| 20A  | 2008 | 5       | 0           | 0     | 5                        | 5                    | 0      | 3                      | 0            | 0             | 2            |
| 20B  | 2004 | 1       | 0           | 0     | 1                        | 0                    | 1      | 0                      | 0            | 1             | 0            |
| 20B  | 2005 | 2       | 0           | 0     | 1                        | 1                    | 1      | 1                      | 0            | 0             | 1            |
| 20B  | 2007 | 6       | 0           | 0     | 2                        | 2                    | 4      | 4                      | 0            | 1             | 1            |
| 20B  | 2008 | 3       | 0           | 0     | 3                        | 3                    | 0      | 1                      | 0            | 0             | 2            |
| 20C  | 2004 | 6       | 1           | 0     | 4                        | 4                    | 2      | 4                      | 0            | 1             | 1            |
| 20C  | 2005 | 3       | 0           | 0     | 3                        | 1                    | 2      | 0                      | 1            | 1             | 1            |
| 20C  | 2006 | 4       | 0           | 0     | 2                        | 2                    | 2      | 4                      | 0            | 0             | 0            |
| 20C  | 2007 | 4       | 0           | 0     | 4                        | 3                    | 1      | 4                      | 0            | 0             | 0            |
| 20C  | 2008 | 5       | 0           | 0     | 3                        | 3                    | 2      | 3                      | 0            | 0             | 2            |
| 21   | 2004 | 1       | 0           | 0     | 1                        | 1                    | 0      | 1                      | 0            | 0             | 0            |
| 21   | 2005 | 2       | 0           | 0     | 0                        | 1                    | 1      | 2                      | 0            | 0             | 0            |
| 21   | 2006 | 1       | 0           | 0     | 1                        | 1                    | 0      | 1                      | 0            | 0             | 0            |
| 21   | 2007 | 2       | 0           | 0     | 2                        | 1                    | 1      | 2                      | 0            | 0             | 0            |
| 21   | 2008 | 6       | 0           | 0     | 3                        | 1                    | 5      | 2                      | 1            | 0             | 3            |
| 21W  | 2004 | 4       | 0           | 0     | 3                        | 1                    | 3      | 3                      | 1            | 0             | 0            |
| 21W  | 2005 | 6       | 0           | 0     | 5                        | 3                    | 3      | 2                      | 1            | 0             | 3            |
| 21W  | 2006 | 3       | 0           | 0     | 3                        | 0                    | 3      | 3                      | 0            | 0             | 0            |
| 21W  | 2007 | 1       | 0           | 0     | 1                        | 0                    | 1      | 0                      | 1            | 0             | 0            |
| 22   | 2004 | 20      | 0           | 0     | 14                       | 10                   | 9      | 9                      | 1            | 1             | 9            |
| 22   | 2005 | 4       | 0           | 0     | 4                        | 3                    | 1      | 3                      | 0            | 0             | 1            |
| 22   | 2006 | 5       | 0           | 0     | 5                        | 4                    | 1      | 2                      | 0            | 0             | 3            |
| 22   | 2007 | 8       | 0           | 0     | 7                        | 5                    | 3      | 4                      | 1            | 0             | 3            |
| 22   | 2008 | 14      | 0           | 0     | 9                        | 7                    | 7      | 5                      | 1            | 3             | 5            |
| 22S  | 2004 | 3       | 0           | 0     | 2                        | 2                    | 1      | 2                      | 1            | 0             | 0            |
| 22S  | 2005 | 1       | 0           | 0     | 1                        | 0                    | 1      | 1                      | 0            | 0             | 0            |
| 22S  | 2006 | 2       | 0           | 0     | 0                        | 0                    | 2      | 1                      | 0            | 1             | 0            |
| 22S  | 2007 | 4       | 0           | 0     | 4                        | 3                    | 1      | 4                      | 0            | 0             | 0            |
| 22S  | 2008 | 4       | 0           | 0     | 3                        | 2                    | 2      | 3                      | 0            | 1             | 0            |
| 23   | 2004 | 11      | 0           | 0     | 8                        | 6                    | 5      | 6                      | 1            | 1             | 3            |
| 23   | 2005 | 12      | 0           | 0     | 5                        | 9                    | 3      | 4                      | 0            | 4             | 4            |
| 23   | 2006 | 16      | 0           | 0     | 10                       | 6                    | 10     | 5                      | 4            | 1             | 6            |
| 23   | 2007 | 17      | 0           | 0     | 10                       | 9                    | 7      | 8                      | 1            | 3             | 4            |
| 23   | 2008 | 12      | 0           | 0     | 10                       | 6                    | 6      | 4                      | 2            | 0             | 6            |
| 24A  | 2004 | 7       | 0           | 0     | 3                        | 5                    | 2      | 3                      | 1            | 0             | 3            |
| 24A  | 2005 | 10      | 0           | 0     | 4                        | 5                    | 5      | 1                      | 1            | 3             | 5            |
| 24A  | 2006 | 13      | 2           | 0     | 10                       | 10                   | 3      | 5                      | 3            | 3             | 2            |
| 24A  | 2007 | 11      | 1           | 1     | 7                        | 8                    | 3      | 2                      | 1            | 0             | 7            |
| 24A  | 2008 | 9       | 0           | 1     | 7                        | 4                    | 5      | 2                      | 1            | 0             | 6            |
| 24B  | 2004 | 5       | 0           | 0     | 3                        | 2                    | 3      | 2                      | 0            | 1             | 2            |
| 24B  | 2005 | 3       | 0           | 0     | 1                        | 1                    | 2      | 0                      | 1            | 0             | 2            |
| 24B  | 2006 | 3       | 0           | 0     | 3                        | 3                    | 0      | 3                      | 0            | 0             | 0            |
| 24B  | 2007 | 2       | 0           | 0     | 1                        | 1                    | 1      | 2                      | 0            | 0             | 0            |
| 24B  | 2008 | 7       | 0           | 0     | 4                        | 3                    | 4      | 4                      | 0            | 0             | 1            |
| 27   | 2004 | 16      | 4           | 0     | 6                        | 5                    | 11     | 4                      | 1            | 4             | 7            |
| 27   | 2005 | 5       | 2           | 0     | 2                        | 4                    | 1      | 3                      | 0            | 1             | 1            |
| 27   | 2006 | 3       | 6           | 0     | 2                        | 2                    | 1      | 1                      | 0            | 1             | 1            |
| 27   | 2007 | 5       | 1           | 1     | 3                        | 1                    | 4      | 2                      | 0            | 0             | 3            |
| 27   | 2008 | 13      | 0           | 0     | 2                        | 4                    | 8      | 1                      | 1            | 1             | 8            |
| 27BC | 2005 | 1       | 0           | 0     | 0                        | 1                    | 0      | 0                      | 0            | 0             | 1            |
| 27BC | 2007 | 1       | 0           | 0     | 0                        | 0                    | 1      | 0                      | 0            | 1             | 0            |
| 27BC | 2008 | 1       | 0           | 0     | 0                        | 1                    | 0      | 0                      | 0            | 1             | 0            |
| 27-P | 2005 | 3       | 0           | 0     | 1                        | 1                    | 2      | 0                      | 0            | 2             | 1            |
| 27-P | 2008 | 1       | 0           | 0     | 1                        | 1                    | 0      | 0                      | 1            | 0             | 0            |
| 28   | 2004 | 1       | 8           | 0     | 1                        | 0                    | 1      | 1                      | 0            | 0             | 0            |

# Mountain Lion Hunt Data

## 5-Year: 2004-2008 Mountain Lion Hunt Data

| Unit | Year | Harvest |             |       | Sport Harvest<br>Using Dogs | Sex of Sport<br>Harvest |        | Month of Sport Harvest |                 |                  |                 |
|------|------|---------|-------------|-------|-----------------------------|-------------------------|--------|------------------------|-----------------|------------------|-----------------|
|      |      | Sport   | Depredation | Other |                             | Male                    | Female | Jan. to<br>March       | Apr. to<br>June | July to<br>Sept. | Oct. to<br>Dec. |
| 28   | 2005 | 2       | 16          | 0     | 2                           | 2                       | 0      | 0                      | 1               | 0                | 1               |
| 28   | 2006 | 2       | 11          | 0     | 1                           | 2                       | 0      | 0                      | 1               | 1                | 0               |
| 28   | 2007 | 2       | 10          | 0     | 1                           | 1                       | 1      | 2                      | 0               | 0                | 0               |
| 28   | 2008 | 5       | 11          | 0     | 3                           | 2                       | 3      | 2                      | 1               | 0                | 2               |
| 29   | 2004 | 3       | 0           | 0     | 2                           | 1                       | 2      | 2                      | 0               | 0                | 1               |
| 29   | 2005 | 7       | 1           | 0     | 3                           | 3                       | 4      | 4                      | 1               | 0                | 2               |
| 29   | 2006 | 8       | 0           | 0     | 6                           | 3                       | 5      | 4                      | 1               | 0                | 3               |
| 29   | 2007 | 7       | 0           | 0     | 5                           | 5                       | 2      | 3                      | 2               | 0                | 2               |
| 29   | 2008 | 4       | 0           | 0     | 4                           | 3                       | 1      | 2                      | 0               | 0                | 2               |
| 30A  | 2004 | 9       | 0           | 0     | 7                           | 7                       | 2      | 3                      | 1               | 0                | 5               |
| 30A  | 2005 | 11      | 0           | 0     | 9                           | 4                       | 7      | 4                      | 1               | 1                | 5               |
| 30A  | 2006 | 7       | 0           | 0     | 6                           | 4                       | 3      | 4                      | 1               | 0                | 2               |
| 30A  | 2007 | 5       | 0           | 0     | 3                           | 2                       | 3      | 3                      | 1               | 0                | 1               |
| 30A  | 2008 | 6       | 0           | 0     | 5                           | 4                       | 2      | 5                      | 0               | 0                | 1               |
| 30B  | 2005 | 3       | 0           | 0     | 1                           | 2                       | 1      | 1                      | 0               | 0                | 2               |
| 30B  | 2008 | 0       | 0           | 1     | —                           | —                       | —      | —                      | —               | —                | —               |
| 31   | 2004 | 8       | 9           | 0     | 4                           | 4                       | 4      | 3                      | 1               | 0                | 4               |
| 31   | 2005 | 8       | 11          | 0     | 4                           | 3                       | 5      | 2                      | 1               | 0                | 5               |
| 31   | 2006 | 4       | 4           | 0     | 1                           | 0                       | 4      | 1                      | 1               | 1                | 1               |
| 31   | 2007 | 4       | 7           | 0     | 2                           | 2                       | 2      | 3                      | 1               | 0                | 0               |
| 31   | 2008 | 3       | 13          | 0     | 1                           | 3                       | 0      | 2                      | 0               | 0                | 1               |
| 32   | 2004 | 6       | 5           | 0     | 1                           | 5                       | 1      | 2                      | 0               | 0                | 4               |
| 32   | 2005 | 6       | 4           | 0     | 5                           | 2                       | 4      | 2                      | 0               | 2                | 2               |
| 32   | 2006 | 12      | 9           | 1     | 4                           | 6                       | 6      | 1                      | 2               | 0                | 9               |
| 32   | 2007 | 10      | 4           | 0     | 5                           | 5                       | 5      | 4                      | 0               | 1                | 5               |
| 32   | 2008 | 13      | 13          | 0     | 9                           | 6                       | 7      | 7                      | 0               | 1                | 5               |
| 33   | 2004 | 9       | 0           | 0     | 3                           | 6                       | 3      | 2                      | 2               | 1                | 4               |
| 33   | 2005 | 11      | 0           | 0     | 5                           | 7                       | 4      | 4                      | 2               | 0                | 5               |
| 33   | 2006 | 5       | 0           | 1     | 1                           | 3                       | 2      | 0                      | 0               | 1                | 4               |
| 33   | 2007 | 16      | 0           | 0     | 13                          | 12                      | 4      | 9                      | 4               | 1                | 2               |
| 33   | 2008 | 15      | 0           | 0     | 7                           | 7                       | 8      | 3                      | 4               | 0                | 8               |
| 34A  | 2004 | 6       | 0           | 0     | 2                           | 1                       | 4      | 4                      | 0               | 1                | 1               |
| 34A  | 2005 | 7       | 0           | 0     | 3                           | 4                       | 3      | 3                      | 0               | 1                | 3               |
| 34A  | 2006 | 9       | 0           | 0     | 5                           | 3                       | 6      | 4                      | 3               | 0                | 2               |
| 34A  | 2007 | 13      | 0           | 0     | 4                           | 3                       | 10     | 5                      | 2               | 1                | 5               |
| 34A  | 2008 | 10      | 0           | 0     | 4                           | 4                       | 5      | 3                      | 2               | 0                | 5               |
| 34B  | 2004 | 3       | 0           | 0     | 3                           | 2                       | 1      | 2                      | 1               | 0                | 0               |
| 34B  | 2005 | 5       | 0           | 0     | 3                           | 1                       | 4      | 2                      | 0               | 0                | 3               |
| 34B  | 2007 | 10      | 0           | 0     | 9                           | 8                       | 2      | 4                      | 5               | 0                | 1               |
| 34B  | 2008 | 5       | 0           | 0     | 5                           | 2                       | 3      | 0                      | 1               | 1                | 3               |
| 35A  | 2005 | 3       | 0           | 0     | 0                           | 1                       | 2      | 1                      | 0               | 1                | 1               |
| 35A  | 2006 | 1       | 0           | 0     | 1                           | 1                       | 0      | 0                      | 0               | 1                | 0               |
| 35A  | 2007 | 5       | 0           | 1     | 1                           | 2                       | 2      | 2                      | 0               | 0                | 3               |
| 35A  | 2008 | 5       | 0           | 0     | 3                           | 4                       | 1      | 0                      | 2               | 0                | 3               |
| 35B  | 2004 | 2       | 0           | 0     | 2                           | 2                       | 0      | 0                      | 2               | 0                | 0               |
| 35B  | 2006 | 1       | 0           | 0     | 1                           | 1                       | 0      | 1                      | 0               | 0                | 0               |
| 35B  | 2007 | 2       | 0           | 0     | 2                           | 1                       | 1      | 0                      | 0               | 2                | 0               |
| 35B  | 2008 | 2       | 0           | 0     | 0                           | 2                       | 0      | 0                      | 0               | 0                | 2               |
| 36A  | 2004 | 6       | 0           | 0     | 3                           | 4                       | 2      | 2                      | 0               | 0                | 4               |
| 36A  | 2005 | 3       | 0           | 0     | 3                           | 2                       | 1      | 2                      | 0               | 1                | 0               |
| 36A  | 2006 | 5       | 0           | 0     | 2                           | 2                       | 3      | 1                      | 1               | 0                | 3               |
| 36A  | 2007 | 5       | 0           | 0     | 2                           | 4                       | 1      | 2                      | 0               | 0                | 3               |
| 36A  | 2008 | 10      | 0           | 0     | 7                           | 6                       | 4      | 2                      | 5               | 0                | 3               |
| 36B  | 2004 | 8       | 0           | 0     | 5                           | 4                       | 4      | 3                      | 2               | 1                | 2               |
| 36B  | 2005 | 3       | 0           | 0     | 0                           | 0                       | 3      | 0                      | 0               | 0                | 3               |
| 36B  | 2006 | 6       | 0           | 0     | 1                           | 2                       | 4      | 0                      | 0               | 0                | 6               |
| 36B  | 2007 | 6       | 1           | 0     | 2                           | 3                       | 3      | 2                      | 0               | 1                | 3               |
| 36B  | 2008 | 3       | 0           | 0     | 2                           | 2                       | 1      | 1                      | 0               | 0                | 2               |
| 36C  | 2004 | 2       | 0           | 0     | 1                           | 0                       | 2      | 0                      | 0               | 0                | 2               |
| 36C  | 2006 | 6       | 0           | 0     | 1                           | 2                       | 4      | 2                      | 1               | 0                | 3               |
| 36C  | 2007 | 3       | 0           | 0     | 1                           | 3                       | 0      | 2                      | 0               | 0                | 1               |
| 36C  | 2008 | 1       | 0           | 0     | 0                           | 0                       | 1      | 0                      | 0               | 0                | 1               |



# Mountain Lion Hunt Data

## 5-Year: 2004-2008 Mountain Lion Hunt Data

| Unit    | Year | Harvest |             |       | Sport Harvest<br>Using Dogs | Sex of Sport<br>Harvest |        | Month of Sport Harvest |                 |                  |                 |
|---------|------|---------|-------------|-------|-----------------------------|-------------------------|--------|------------------------|-----------------|------------------|-----------------|
|         |      | Sport   | Depredation | Other |                             | Male                    | Female | Jan. to<br>March       | Apr. to<br>June | July to<br>Sept. | Oct. to<br>Dec. |
| 37A     | 2004 | 1       | 0           | 0     | 0                           | 0                       | 1      | 0                      | 1               | 0                | 0               |
| 37A     | 2006 | 1       | 0           | 0     | 1                           | 0                       | 1      | 0                      | 1               | 0                | 0               |
| 37A     | 2007 | 2       | 0           | 0     | 0                           | 1                       | 1      | 0                      | 0               | 0                | 2               |
| 37B     | 2004 | 1       | 0           | 0     | 1                           | 0                       | 1      | 0                      | 0               | 0                | 1               |
| 37B     | 2005 | 8       | 0           | 0     | 6                           | 6                       | 2      | 6                      | 0               | 0                | 2               |
| 37B     | 2006 | 4       | 0           | 0     | 3                           | 2                       | 2      | 3                      | 0               | 0                | 1               |
| 37B     | 2007 | 3       | 0           | 1     | 3                           | 0                       | 3      | 3                      | 0               | 0                | 0               |
| 37B     | 2008 | 8       | 0           | 0     | 4                           | 5                       | 3      | 5                      | 1               | 1                | 1               |
| 40A     | 2008 | 1       | 0           | 0     | 0                           | 0                       | 1      | 0                      | 0               | 1                | 0               |
| 42      | 2004 | 2       | 0           | 0     | 2                           | 1                       | 1      | 0                      | 0               | 2                | 0               |
| 42      | 2006 | 1       | 0           | 0     | 0                           | 0                       | 1      | 1                      | 0               | 0                | 0               |
| 42      | 2007 | 1       | 0           | 0     | 0                           | 0                       | 1      | 1                      | 0               | 0                | 0               |
| 42      | 2008 | 4       | 0           | 0     | 3                           | 2                       | 2      | 0                      | 0               | 1                | 3               |
| 42M     | 2004 | 0       | 0           | 1     | —                           | —                       | —      | —                      | —               | —                | —               |
| 44A     | 2005 | 1       | 0           | 0     | 1                           | 1                       | 0      | 0                      | 1               | 0                | 0               |
| 44A     | 2007 | 1       | 0           | 0     | 0                           | 0                       | 1      | 0                      | 0               | 0                | 1               |
| 44A     | 2008 | 1       | 0           | 0     | 1                           | 1                       | 0      | 0                      | 0               | 0                | 1               |
| Total   | 2004 | 247     | 31          | 1     | 168                         | 123                     | 122    | 120                    | 22              | 15               | 90              |
| Total   | 2005 | 204     | 41          | 0     | 120                         | 103                     | 101    | 88                     | 15              | 21               | 80              |
| Total   | 2006 | 221     | 36          | 5     | 136                         | 108                     | 113    | 95                     | 29              | 16               | 81              |
| Total   | 2007 | 256     | 28          | 5     | 169                         | 146                     | 109    | 128                    | 24              | 18               | 85              |
| Total   | 2008 | 264     | 42          | 5     | 168                         | 142                     | 120    | 101                    | 30              | 19               | 109             |
| Percent | 2004 | 89      | 11          | 0     | 68                          | 50                      | 50     | 49                     | 9               | 6                | 36              |
| Percent | 2005 | 83      | 17          | 0     | 59                          | 50                      | 50     | 43                     | 7               | 10               | 39              |
| Percent | 2006 | 84      | 14          | 2     | 62                          | 49                      | 51     | 43                     | 13              | 7                | 37              |
| Percent | 2007 | 89      | 10          | 2     | 66                          | 57                      | 43     | 50                     | 9               | 7                | 33              |
| Percent | 2008 | 85      | 14          | 2     | 64                          | 54                      | 46     | 38                     | 11              | 7                | 41              |

---

# Small Game

---

## Quail

Arizonans have the privilege of hunting three species of quail—four, if the few California quail found along the Little Colorado River drainage in Apache County are included. These are the Gambel's quail, scaled quail, and Mearns' or Montezuma quail. Another quail, formerly found in Arizona, the masked bobwhite, is listed federally as an endangered species.

Of the above species, the Gambel's or desert quail is by far the best known. Found in most of the state's counties, these birds are often hunted in open desert country where they are more apt to run or flush than hold for a dog. The Gambel's jaunty, plumed topknot, carried by both sexes, makes for ready identification, along with the male's bright russet cap, black face and bib, and cream-colored belly marked with a black horseshoe. As with all species of quail, the young of the year can be distinguished through their first winter by their spotted secondary wing coverts. Adult males average only about 6 ounces; the slightly smaller females between 5.7 and 5.9 ounces.

The handsome—rather than gaudy—scaled quail is

the second most commonly encountered quail in Arizona. A bird of the open country of eastern Arizona, this quail too is more likely to run than hold. Both sexes of this species display white, conical crests, hence the common name of "cottontop." The scaled appellation is appropriate, however, as the birds possess a distinctive scalloping on the breast, nape and belly. Otherwise, their overall color is tan above with a mixture of beige, grays, and whites below. A generally bigger bird than the Gambel's quail, adult male "scalies" average about 7.3 ounces, females 6.7 ounces.

Mearns' quail are the largest and most striking, yet also the most secretive of Arizona's quails. Male Mearns' quail have white and black harlequin-marked heads, capped by a russet shock of feathers that form an ill-fitting crest. These cock quail also possess handsome brown and black checkered backs interlaced with white darts, and white-spotted black flanks similar to a guinea fowl's. Their breasts and underparts are a rich mahogany that turns to black at the rump, which terminates in a stubby, almost non-existent tail. The hens are cinnamon colored with brown, black and buff markings. In winter, the males average about 6.9 ounces,

the females about 6.2 ounces. Long, scythe-shaped claws that are used for digging show that these birds are ground-dwellers, and they hold so well to a dog that this species has come to be known as Arizona's greatest game bird.

### *Natural History*

The sexes of all Arizona quails show some differences in plumage, and all of the species form seasonal pair bonds

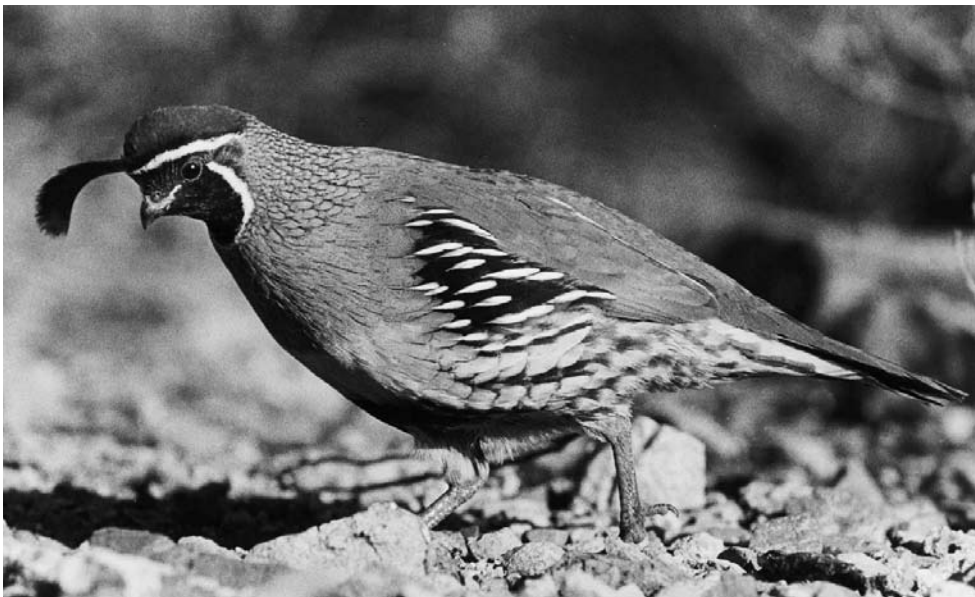

Gambel's quail

BOB MILES

## Small Game

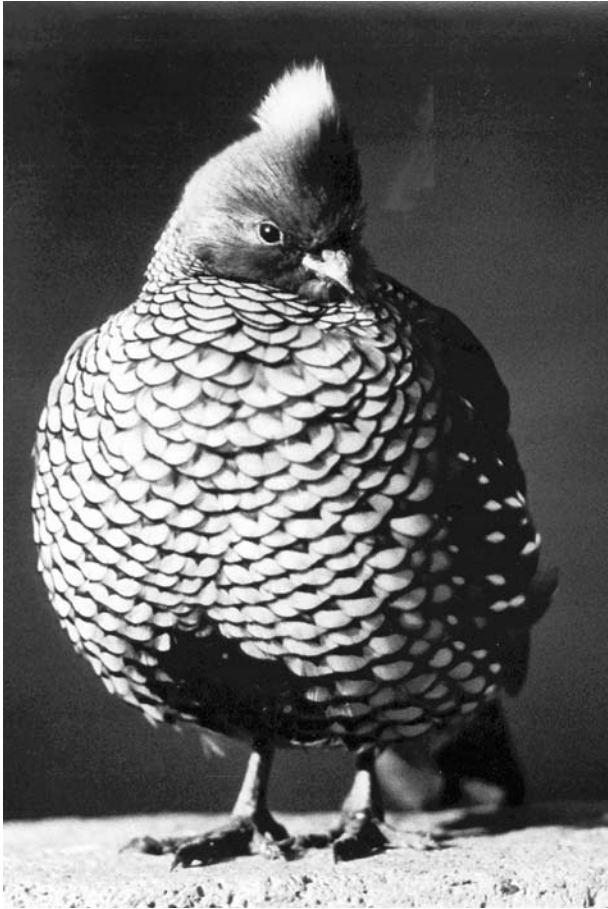

BOB WILES

**Scaled quail**

that last through incubation and brood-raising. Clutch and brood sizes are often large, ranging up to a dozen or more chicks, and both the cock and the hen care for the young. Individual birds have short life spans, however, and population sizes tend to fluctuate widely from year to year. All Arizona species form fall and winter coveys that are likely to remain in the same general area where they were raised.

Each species has its own habitat preferences. The Gambel's quail is found throughout the Sonoran and

Mojave deserts upward in elevation through semi-desert grassland and chaparral to the edges of pinyon-juniper woodland and pine forest—wherever mesquites and other brushy cover occur. The scaled quail is a bird of semidesert grasslands and the

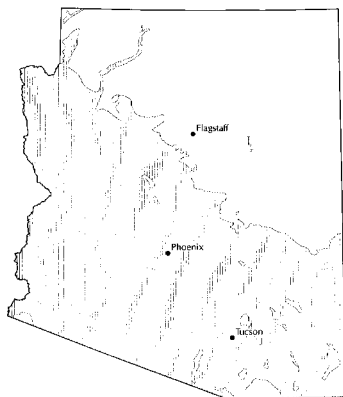

**Gambel's quail distribution**

Chihuahuan desert, preferring open plains and foothills; the Mearns' quail prefers oak woodlands and oak savannas in the southeastern portions of the state where grass cover is abundant enough to conceal its presence.

Although all three major species of Arizona quail have formed pair bonds by March, they each have different breeding seasons. Gambel's quail breed only in spring and early summer, and breeding intensity and success are directly related to the amount of rainfall received during the previous October through March. The breeding season of scaled quail is more complex. They breed in spring after wet winters, but also during the summer months after the monsoons have started. Mearns' quail nest only after the summer monsoon season, and often postpone breeding until after the summer solstice when the days are getting shorter. The factors determining the population levels of the various species also differ. The numbers of Gambel's quail are related more to the success of the hatch than to carry-over from the previous year. Scaled quail numbers are determined by both the success of the hatch and the number of birds surviving from the year before. Mearns' quail generally have good hatching success, and their highly fluctuating numbers are determined largely by how many birds survive the winter. All of the birds experience relatively high winter mortality. The scaled and Mearns' quail are more dependent on grass cover for over-winter survival than is the Gambel's quail, and hence are more sensitive to livestock grazing pressures than the Gambel's.

### *Hunt History*

By the turn of the century, quail hunting had become a popular pastime in Arizona, and a generous season and lack of a bag limit gave the state a reputation for harboring "game-hogs." Then, in 1909, the territorial legislature limited quail hunting to an open season of October 16 through January 31, an arrangement that was retained in the state game code of 1912 along with a bag limit of 25 quail. In 1929 quail numbers must have been thought to be in need of improvement, as the season was shortened to November 1 through December 31, and the following year the newly appointed Arizona Game and Fish Commission reduced the bag limit to 15 quail per day. There was no season on Mearns' or "fool quail" as this species was commonly known.

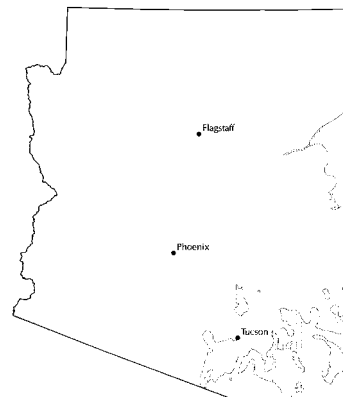

**Scaled quail distribution**

During the years that followed, quail seasons and bag limits varied in response to quail numbers and the success of the hatch, which in some years, such as 1946-48, was so poor that no season was authorized. It was believed that unless the ratio of young to adult quail observed on summer surveys was

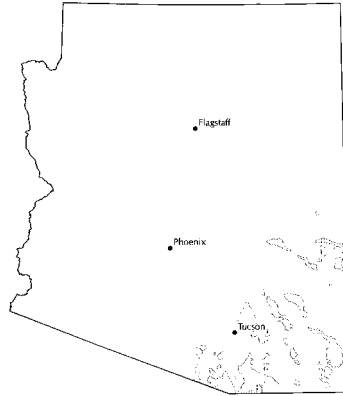

**Mearns' quail distribution**

less than 2.1:1 a hunt could not be justified, and even when there was a season, it might be only two days long with a five-bird bag limit. Then, in the 1950s and early 1960s, research showed that hunting mortality was compensatory to natural mortality, and a standardized season from mid-October through the end of the month, followed by another season from November 1 through the end of January, gradually became the norm, along with a 15-bird bag limit. Later, the month of November was also opened to quail hunting and the closing date delayed until mid-February. This season, which applies to both Gambel's and scaled quail, has continued to the present day.

In 1960 a two-day season on Mearns' quail was authorized for a limited area in the Santa Rita Mountains. Hunting was shown to have a negligible effect on this species also, and this season too was gradually expanded. Today, the season opens in mid-November in deference to the bird's late nesting habits, and continues to mid-February. This bird and season has become so popular with bird dog hunters that recent Commission meetings

have often entertained proposals to lower the 15-bird bag limit to a lesser number in an attempt to "spread out the harvest."

Quail hunting in Arizona has always had its ups and downs. The top year in recent times was in 1979 when nearly 100,000 hunters reported harvesting more than 2.5 million quail. Since then, quail numbers and hunter interest have fallen off, with hunter numbers ranging from 44,000 to 75,000 each year between 1990 and 1999. The reported harvest of Gambel's quail during this same period has fluctuated from slightly more than 300,000 to just over 1.3 million, causing some hunters and wildlife managers to wonder if a long-term decline in quail numbers may have occurred.

## White-winged Dove

This bird's hefty size and rounded off tail give the "white-wing" the appearance of being half dove and half pigeon, hence the older name of "Sonora pigeon." Whitewings differ from the more widespread mourning dove in having an overall grayer plumage, a white-tipped tail, and the white wing epaulets that give the bird its name. Unless pressed by gunners, the whitewing's flight also appears slower, less purposeful, and more pigeonlike than the mourning dove's. Adults can be distinguished by an unfeathered bright blue eye patch, red feet, and eyes that range from yellow-orange to orange-red. By way of contrast, birds of the year have dull purplish-brown feet and are marked mostly in grays, whites, and browns. Adult males are especially handsome birds, their brownish heads crowned in reddish purple with areas on the neck flecked with gold, green, and purple iridescence. The average weight of an adult male is about 5.5 ounces, although birds weighing up to 8 ounces have been recorded.

### *Natural History*

There are two types of white-winged dove populations in Arizona, a thinly scattered population found throughout the Sonoran Desert and the surrounding countryside (including towns and residential neighborhoods), and colonial populations that nest collectively along river bottoms adjacent to agricultural areas. Most of the desert and residential area whitewings nest only once and migrate out of the state prior to the opening of the dove season on September 1. The colonial whitewings, however, usually nest twice before departing for their wintering areas in

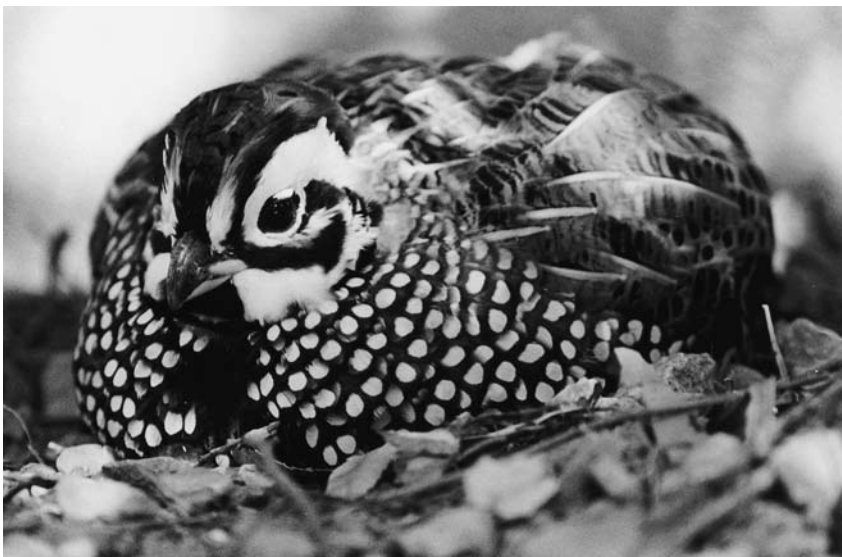

BOB MILES

**Mearns' quail**

southwestern Mexico. These are the whitewings that are most often present after September 1, and which contribute most to the harvest.

Males of both populations begin courtship as soon as they arrive in Arizona in late April and early May. By late May, nesting is at its peak, both sexes sharing in the incubation of the eggs and the feeding and brooding of the two young squabs, most of which hatch toward the end of June. Fed a highly nutritious "pigeon-milk" by their parents, the squabs are usually fledged by late June or July. Should grains

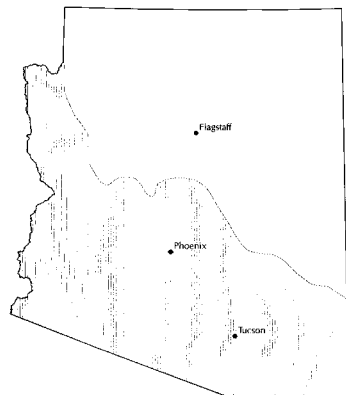

**White-winged dove distribution**

or other high-energy foods be available, the colonial-nesting birds will now attempt another nesting, while the "desert birds" begin migrating south. As the second nesting comes to a close in late July and August, both the juvenile birds and their parents form gregarious flocks in selected roost sites adjacent to favored feeding fields, which unlike those selected by mourning doves, are often composed of standing crops of barley, maize, and safflower. The stimuli for the mass migration from cultivated valleys that takes place about September 1 are not completely understood. Summer storms, a drop in nighttime temperatures, food shortages, and harassment by hunters have all been suggested as reasons for the movement. Nonetheless, there have been years when all of these

events occurred with little or no influence on the onset of migration. Once migration is underway, the departure is often rapid, the adults usually leaving before the juveniles.

### *Hunt History*

A favorable combination of nesting cover and grain crops resulted in two great heydays of white-winged dove hunting in Arizona. The first of these was in the years prior to World War I, and the second was during the years after World War II. So plentiful were these birds that the bag limit was 25 per day and 50 in possession. Numbers peaked in the 1960s when, in 1968, an all-time record harvest of more than 3/4 million was reached. Since then, declining nesting habitat and the virtual replacement of grain farming by cotton and alfalfa have greatly reduced whitewing hunting opportunities. But after reaching a low of 86,000 birds in 1980, whitewing harvests have again gradually increased. Although subject to half-day hunting and reduced bag limits, hunter numbers have stabilized during the past five years when an average of between 25,000 to 30,000 hunters have taken to the field, bagging from 122,000 to 180,000 white-wings a year.

## Mourning Dove

This is the most common and widely occurring game bird in Arizona, and the dove's trim, streamlined body, accentuated by its tiny head and sharply tapered tail is familiar to even the most casual observer of birds. This dove can also be differentiated from its white-winged cousin by its overall brown color, a lack of white on all but the outer tail feathers, the presence of black spots on the upper wing surfaces, and the distinctive rattling whistle that is emitted by the bird's wing feathers when it takes flight. The more richly colored adult males can usually be distinguished at all times of the year from the browner females by their pinkish rose breasts, flecks of metallic green and other iridescence on the napes of their necks, and their slate blue crowns. Adult males weigh about 4.3 ounces, females about 4 ounces, with an occasional male weighing up to 6 ounces. Juvenile birds can be identified up to 4 or 5 months of age by the white tipping on the margins of their wing feathers.

### *Natural History*

Mourning doves occur from the lowest elevations along the Colorado River upward through forests of ponderosa pines to 8,500 feet. Their staple foods throughout the year are primarily small seeds and cultivated grains. Although some doves can be found nesting

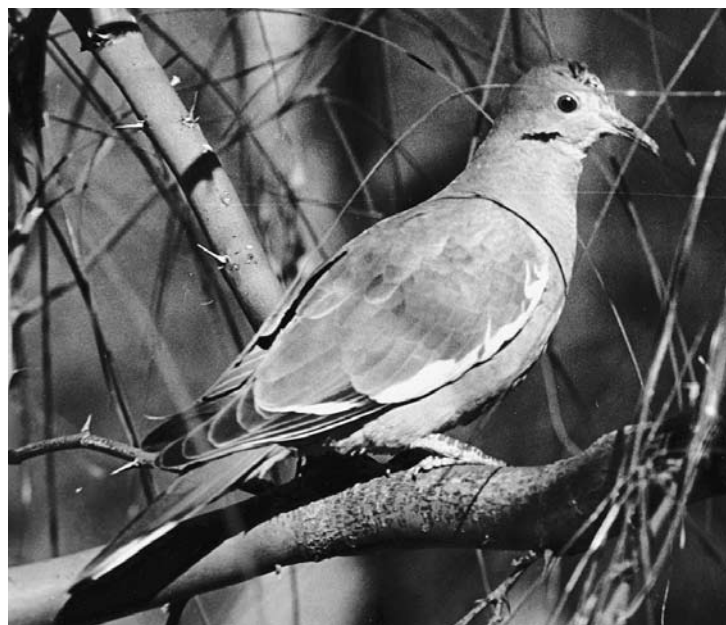

ARIZONA GAME AND FISH DEPARTMENT

**White-winged dove**

on the ground in open prairies, the best nesting habitats are brushlands and woodlands within the Sonoran Desert. Here, the woeful call of breeding males can be heard as early as February, and pairs have been known to attempt

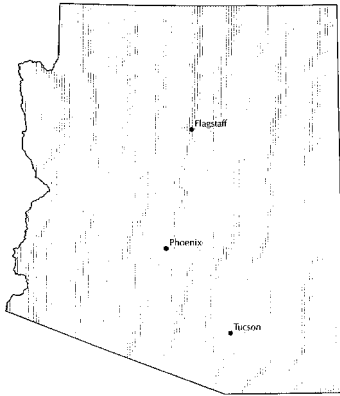

### Mourning dove distribution

as many as seven nestings in a single season. Productivity may therefore be high even though the usual clutch size is only two eggs. Incubation takes only about 15 days, and is accomplished by both parents, as is the brooding and feeding of the nearly naked squabs. The young doves are fed regurgitated "pigeon milk" by both parents, and they grow and develop rapidly. Fledglings leave the nest only 12 to 14 days after hatching. Even in southern Arizona, nesting is essentially over by mid-August, and some of the early-hatched juveniles have already migrated by late July. By the first week of September, the migration of most nesting populations is usually underway, the juveniles typically leaving before the adults.

### Hunt History

Prior to statehood this species was hunted primarily in conjunction with white-winged dove, and spring and summer shooting over grain fields was a common occurrence. In 1929, however, state and federal regulations curtailed the mourning dove season in Arizona to between September 1 and December 15, and established a 20-bird bag limit. As with the white-winged dove, the glory days of mourning dove shooting were in the 1960s and 1970s, when more than 100,000 hunters reported harvesting up to 2.5 million mourning doves a year. Although still ranked as one of Arizona's two most important game birds, mourning dove hunting has since fallen off due to urban expansion, changing farm practices, and more restrictive season arrangements. Questionnaire surveys indicate that during the past 10 years, an average of from 45,000 to 60,000 hunters bagged from 1 million to 1.3 million doves each year.

## Cottontail Rabbit

Three species of cottontail occur in Arizona: the mountain cottontail, eastern cottontail, and desert cottontail. The smallest of these (22-30 ounces) is the relatively short-eared mountain cottontail, which is largely restricted to elevations above 7,500 feet from the Mogollon Rim

northward. The generally larger eastern cottontail (28-52 ounces) is found in the mountains of southeastern and central Arizona where it occupies many of the same habitats as the Coues white-tailed deer. The most abundant and important rabbit by far, however, is the desert cot-

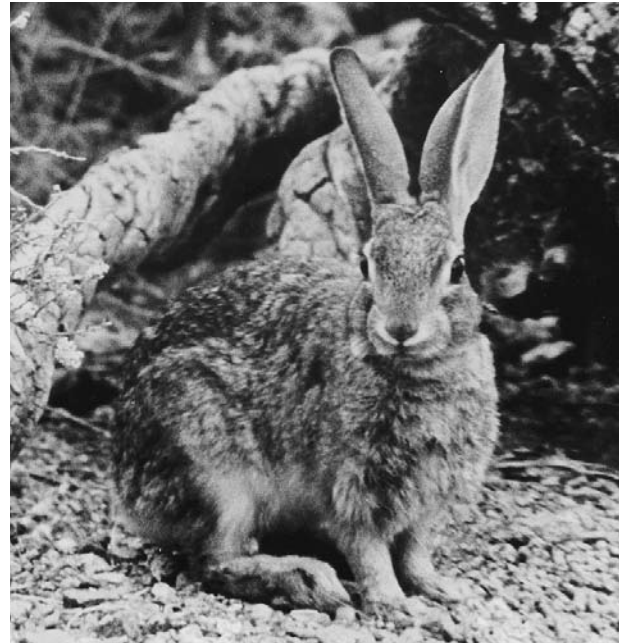

MARY IRELAND

### Cottontail rabbit

ontail (26.5-44 ounces), which is found in every county in the state up to elevations exceeding 7,000 feet.

### Natural History

Despite, or perhaps because of, their relative abundance, little is known about the life histories of Arizona cottontails. Only one study has been conducted on desert cottontails, and none on eastern and mountain cottontails. Although we know that cottontail rabbits may vary from amazing abundance in one year to relative scarcity the next, we have little insight as to what factors other

than winter rainfall control their numbers. Promiscuous and prolific, cottontails feeding on green growth may have up to five litters of two to four young a year. But, although the desert cottontail is able to breed throughout the year, most young rabbits are produced in spring

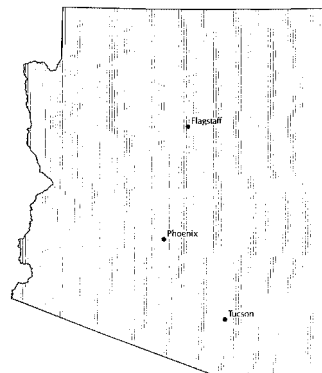

### Cottontail rabbit distribution

when the new growth of plants is most available. At other times of the year, selected foods include twigs, newly emerging grasses, weeds, and even cacti. Cottontails rarely drink, and free water does not appear to be a requirement for either their survival or reproduction.

### *Hunt History*

The cottontail hunting season has always been year-long in Arizona, and the bag limit has been 10 rabbits per day for many years. Although some hunters consider cottontail hunting with a .22 rifle as their primary sport, cottontails traditionally have been taken in Arizona in conjunction with dove and quail hunting. As a consequence of the wide fluctuations in both cottontail and quail numbers, the annual take of cottontails is highly erratic, ranging from a reported high of about 850,000 rabbits in 1979 to less than 56,000 in 1998. The mean number of hunters reportedly hunting this animal during the past 10 years has been 18,662, and their average take has been 91,915 rabbits per year.

## Tree Squirrels

No fewer than four species and eight subspecies of tree squirrels can be found in Arizona's forests. Of these, the Abert's or tassel-eared squirrel is the most widespread and contributes most to the annual squirrel harvest. This

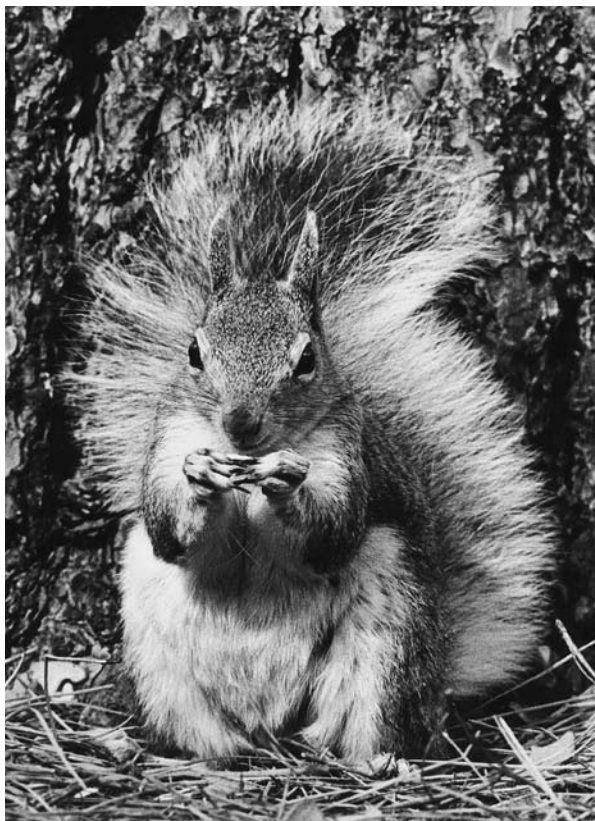

BOB WILES

**Abert's Squirrels**

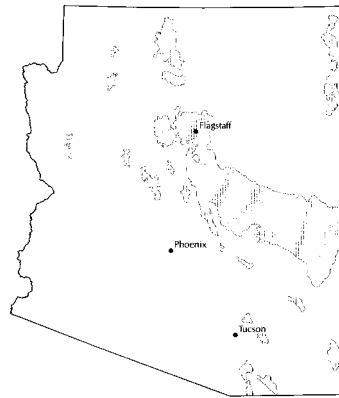

**Tree squirrel distribution**

white-bellied Arizona gray squirrel and its close relative, the rust-colored Chiricahua fox squirrel, both of which inhabit riparian deciduous forests and oak woodlands south of the Mogollon Rim. Another species is the chipmunk or red squirrel (actually more olive or gray than red in Arizona), which is restricted to the higher forests of spruce and fir above 8,500 feet elevation. Both the tassel-eared and gray squirrels average a little under 1.5 pounds in weight, while the diminutive red squirrel averages just over 0.5 pounds.

### *Natural History*

Tassel-eared squirrels have but one breeding season a year, which is closely correlated with the production of the staminate flowers of ponderosa pine in late April, May, or early June. After a lengthy chase, the female comes into estrus for only one day. She will later give birth to a single litter of from two to four young in a nest made of pine boughs. Throughout the summer, the squirrels feed on the seeds of developing cones as well as on underground fungi or truffles that grow under mature pine trees. These foods are the most nutritious for the squirrel, and only when they are exhausted does the animal resort to feeding on the inner bark of pine twigs—the discarded terminals of which are often seen littering the forest floor. These “clippings” of inner bark are only an emergency food, however, and if deep snow-cover or other factors force the squirrel to rely entirely on this food source, the animal will eventually go into shock and die. Only after years of research was it learned that the periods of tassel-eared squirrel scarcity and abundance were related to the amount of snow-cover and the availability of underground fungi. Most squirrel mortality is during the late winter, and when snow covers the ground for 80 or more days, the mortality rate exceeds the squirrel's rather modest recruitment rate. Hunting apparently has little effect on the animal's numbers as other research shows the lowest monthly mortality is during the October and November hunting season.

squirrel, with its easily discernible ear tufts, along with its close relatives, the black-bellied and white-tailed Kaibab squirrels, are exclusively inhabitants of ponderosa pine forests and the life cycles of the squirrels and the tree are remarkably intertwined. Less well known is the also



## Hunt History

Tree squirrels have an uneven history as game in Arizona. Having gone from being totally ignored at the time of statehood, to having a limited season in conjunction with the deer and turkey seasons in the 1920s, the season was closed in 1935 due to a perceived lack of squirrels. Too many squirrels in the 1940s resulted in a re-opening of the season, and squirrel hunt regulations have since been liberalized gradually until every species and most subspecies are now subjected to limited hunting. Even the once sacrosanct Kaibab squirrel is now hunted, and the only totally protected squirrel is the federally endangered Graham Mountain spruce squirrel.

The tassel-eared or Abert's squirrel is the major game species, however, and the numbers of tree squirrel hunters and harvest depends largely on the vagaries of tassel-eared squirrel numbers. Questionnaire data collected since the early 1960s show that the peak number of hunters was in 1986 when 21,402 squirrel hunters took to the field and bagged nearly 165,000 squirrels for a hunter success of 2.5 squirrels per day. Since 1990 the number of hunters has generally averaged between 12,000 and 18,000 a year with the average annual harvest being between 50,000 and 100,000 tree squirrels.

## Band-tailed Pigeon

About the size of a domestic pigeon, adult bandtails average just a little less than 8 ounces in weight, the females weighing about 0.8 ounces less than the males. Both sexes have an overall blue-gray appearance, and it is only after close inspection that one notices the male's rosier breast and more iridescence on the nape of the neck; otherwise, the sexes are similar. In autumn, adults can be differentiated from their young by the adult's chrome-yellow bills and feet, white crescent at the nape of the neck, and the dark gray band across the top of the tail that gives the bird its name.

### Natural History

Bandtails are birds of the mountains and usually nest in mixed conifer forests, ponderosa pine forests, or in dense stands of evergreen oaks and pines between 4,500 and 9,100 feet elevation. As migratory birds, bandtails are usually only present in Arizona from late March through mid-October. Breeding

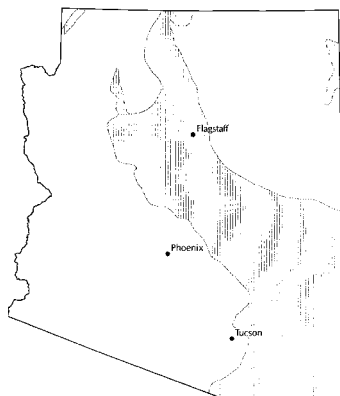

**Band-tailed pigeon distribution**

generally takes place sometime in May and may continue through the summer, with some birds nesting twice and even three times in some years. The normal clutch is one glossy white egg, or occasionally two, so that the species' reproductive potential is low. After feeding on acorns and other fall mast crops, most Arizona band-tails migrate southward to the Sierra Madre Occidental in Mexico to spend the winter months.

### Hunt History

Bandtail hunting has an erratic history in Arizona. After the season was closed in 1951 for a perceived lack of birds, interest in band-tailed pigeons waned until a study was initiated in the "four-corner" states of Arizona, New Mexico, Colorado and Utah in the 1960s. These studies included an experimental season, which opened in 1968, and continued through 1972. Hunt information showed a limited but dedicated interest in the band-tailed pigeon as a game bird with the maximum number of hunters and birds harvested being 1,067 hunters and 3,545 pigeons in 1970. The numbers of both pigeons and pigeon hunters has since fallen off with only 146 bandtails reportedly taken in 1996. Now it appears that band-tailed pigeon numbers may again be inching upward.

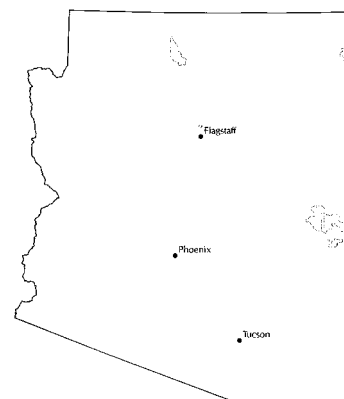

**Blue grouse distribution**

## Blue Grouse

Blue grouse are bluish-gray, chickenlike birds restricted in Arizona to elevations above 8,500 feet in mixed conifer and aspen forests. As a consequence, these birds are only found in the White, Blue, Escudilla, Chuska, and Buckskin (North Kaibab) mountains, and on the San Francisco Peaks where they were introduced in the mid-1970s. Males are measurably larger than females, 2-year-old "cocks" weighing up to 3 pounds as opposed to the adult female's average weight of between 1.75 to 2 pounds. In comparison, first-year birds or poult typically weigh only 16 to 28 ounces during the early days of the September hunting season.

### Natural History

Blue grouse in Arizona do not migrate downhill during the winter months as they do in the more northern



states. Instead, they spend the winter roosting in Douglas-fir trees, subsisting on needles until spring when the males form small “leks” or strutting grounds, which they occupy from April through June. Oftentimes these leks are located on a fallen log or in a small clearing in the forest, where the cock attempts to engage any hen that comes his way with soft “hooting” displays and “flutter flights.” The peak of mating activity usually takes place during the last part of May or the first week of June, after which the male goes off to leave the hen to nest and raise the chicks on her own. Most broods are hatched between mid-June and mid-July during which time the hen and poults feed primarily on forbs and insects. Four to six is an average brood size, the young staying with the hen through the fall months. Fall usually finds the hens and poults at the edge of mountain meadows and in old burns feeding on forbs, while the now solitary males tend to favor aspen thickets and other dense cover.

### *Hunt History*

The first legal season on blue grouse in Arizona did not take place until 1964 when 33 hunters spent 49 days to harvest 44 grouse. Since that time, a variety of grouse season dates have been authorized, but the number of grouse hunters has remained low due to the birds general scarcity and the steep terrain and high elevations of their habitat. Hunter numbers have never reached 800 in any given year, and the annual harvest since 1973 has been only 300 to 700 grouse.

## Pheasant

Several attempts have been made to establish these natives of Asia as resident game birds in Arizona, the most recent being in the late 1960s and early 1970s when the small white-winged race of the ring-necked pheasant found in Afghanistan was released in farmlands along the Gila, San Pedro, and other river valleys.

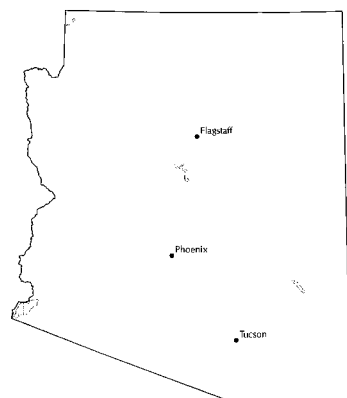

**Ring-necked pheasant distribution**

A handsome, unmistakable bird, both sexes of this pheasant have long pointed tails, but it is the cocks or roosters that are unrivaled in their plumage. Possessing iridescent green heads offset by ear-tufts and a crimson-wattled cheek patch, the rooster also has a purplish chest, a

soot-colored belly, distinctively dotted golden flanks, white wing epaulets, and a handsomely barred tail. Cocks usually weigh more than 2.5 pounds, while the beige- and sand-colored hens average between 1.5 and 2 pounds. Both sexes, but especially the males, typically give a cackle on being flushed that once heard is always remembered.

### *Natural History*

Pheasant populations persisting in Arizona are largely confined to agricultural areas having a relatively high humidity (e.g., citrus orchards in the Yuma and Mesa areas) or high enough in elevation to escape the desiccating heat of Sonoran Desert summers (e.g., the Virgin River and Verde River valleys). In such locations, a rooster will acquire a harem of from one to three hens, with mating commencing in early April. By mid-May most of the hens are nesting and of no further interest to him, and he will abandon his territorial patrols by the end of the month. The peak of hatching is during the last week of May, the most arid time in Arizona, which is one of the reasons why pheasants have not become established here. The youngsters are covered with yellow and brown down, striped in brown and black, and are remarkably self-sufficient. After only about two weeks, they are capable of flight and remain with the hen for only another two months or so before making their own way in the world. Pheasants roost on the ground or the low branches of trees, and the typical hiding cover is a patch of rank weeds, a stand of cattails, or a dense jungle of salt-cedars. Primary foods are cultivated greens and grains—alfalfa, barley sprouts, and kernels of maize, barley, and corn.

### *Hunt History*

Pheasants have always been a specialty game bird in Arizona, and are only taken by a small cadre of hunters, who either obtain one of the limited hunt permits periodically available, hunt with falcons, or hunt with a bow and arrows. With the cessation of the Department's experimental pheasant program in 1973, hunter numbers have never exceeded 100 in any given year and the annual harvest excluding birds taken in game farms has been less than 50 birds.

# Small Game Harvest Data

## Summary of Small Game Harvest Information

| Year                                                                                                                                                                                                                                                                                                                                             | Hunters <sup>1</sup> | Hunter Days | Days/Hunter | Licensed Harvest | Junior Harvest | Total Harvest | Harvest/Day <sup>2</sup> |
|--------------------------------------------------------------------------------------------------------------------------------------------------------------------------------------------------------------------------------------------------------------------------------------------------------------------------------------------------|----------------------|-------------|-------------|------------------|----------------|---------------|--------------------------|
| <b>MOURNING DOVE</b>                                                                                                                                                                                                                                                                                                                             |                      |             |             |                  |                |               |                          |
| 1998                                                                                                                                                                                                                                                                                                                                             | 57,645               | 226,622     | 3.9         | 1,263,242        | 29,573         | 1,292,815     | 5.6                      |
| 1999                                                                                                                                                                                                                                                                                                                                             | 56,157               | 229,623     | 4.1         | 1,278,193        | 44,487         | 1,322,680     | 5.6                      |
| 2000                                                                                                                                                                                                                                                                                                                                             | 54,114               | 209,722     | 3.9         | 1,231,542        | 41,773         | 1,273,315     | 5.9                      |
| 2001                                                                                                                                                                                                                                                                                                                                             | 49,305               | 229,943     | 4.7         | 1,419,539        | 61,934         | 1,481,473     | 6.2                      |
| 2002                                                                                                                                                                                                                                                                                                                                             | 63,821               | 233,002     | 3.7         | 1,437,071        | 48,466         | 1,485,537     | 6.2                      |
| 2003                                                                                                                                                                                                                                                                                                                                             | 55,672               | 253,989     | 4.6         | 1,332,458        | 46,400         | 1,378,858     | 5.3                      |
| 2004                                                                                                                                                                                                                                                                                                                                             | 45,933               | 191,651     | 4.2         | 1,064,373        | 50,285         | 1,114,658     | 5.6                      |
| 2005                                                                                                                                                                                                                                                                                                                                             | 62,745               | 270,826     | 4.3         | 1,635,491        | 67,648         | 1,703,139     | 6.0                      |
| The Small Game questionnaire was modified to collect unit specific data. Sample no longer weighted in analysis. The data is not comparable to historic data. In 2004 and 2005, the historic survey format and the new unit specific survey format were run simultaneously. Beginning in 2006, only the new unit specific survey format was used. |                      |             |             |                  |                |               |                          |
| 2004                                                                                                                                                                                                                                                                                                                                             | 36,926               | 137,049     | 3.7         | 835,763          | 52,051         | 887,814       | 6.1                      |
| 2005                                                                                                                                                                                                                                                                                                                                             | 33,244               | 131,795     | 4.0         | 825,550          | 75,464         | 901,014       | 6.3                      |
| 2006                                                                                                                                                                                                                                                                                                                                             | 71,497               | 273,665     | 3.8         | 1,803,250        | 61,324         | 1,864,574     | 6.8                      |
| Dove were separated from the traditional Small Game questionnaire and surveyed using the new Dove and Band-tailed Pigeon questionnaire in 2007. The sample of hunters surveyed was derived for the list of Migratory Bird Stamp purchasers. The data is not comparable to historic data.                                                         |                      |             |             |                  |                |               |                          |
| 2007                                                                                                                                                                                                                                                                                                                                             | 36,506               | 153,124     | 4.2         | 978,577          | 38,980         | 1,017,557     | 6.6                      |

<sup>1</sup> Includes early and late hunters.

<sup>2</sup> Licensed hunters only; does not include junior harvest.

| Year                                                                                                                                                                                                                                                                                                                                             | Hunters | Hunter Days | Days/Hunter | Licensed Harvest | Junior Harvest | Total Harvest | Harvest/Day <sup>1</sup> |
|--------------------------------------------------------------------------------------------------------------------------------------------------------------------------------------------------------------------------------------------------------------------------------------------------------------------------------------------------|---------|-------------|-------------|------------------|----------------|---------------|--------------------------|
| <b>WHITE-WINGED DOVE</b>                                                                                                                                                                                                                                                                                                                         |         |             |             |                  |                |               |                          |
| 1998                                                                                                                                                                                                                                                                                                                                             | 30,454  | 92,631      | 3.0         | 165,190          | 15,549         | 180,739       | 1.8                      |
| 1999                                                                                                                                                                                                                                                                                                                                             | 26,689  | 89,709      | 3.4         | 135,226          | 7,903          | 143,129       | 1.5                      |
| 2000                                                                                                                                                                                                                                                                                                                                             | 28,652  | 87,868      | 3.1         | 124,261          | 4,434          | 128,695       | 1.4                      |
| 2001                                                                                                                                                                                                                                                                                                                                             | 21,180  | 77,462      | 3.7         | 97,026           | 5,915          | 102,941       | 1.3                      |
| 2002                                                                                                                                                                                                                                                                                                                                             | 35,747  | 107,525     | 3.0         | 178,907          | 6,747          | 185,654       | 1.7                      |
| 2003                                                                                                                                                                                                                                                                                                                                             | 26,598  | 86,120      | 3.2         | 142,269          | 5,442          | 147,711       | 1.7                      |
| 2004                                                                                                                                                                                                                                                                                                                                             | 20,962  | 69,104      | 3.3         | 80,896           | 5,459          | 86,355        | 1.2                      |
| 2005                                                                                                                                                                                                                                                                                                                                             | 29,057  | 98,411      | 3.4         | 134,519          | 5,465          | 139,984       | 1.4                      |
| The Small Game questionnaire was modified to collect unit specific data. Sample no longer weighted in analysis. The data is not comparable to historic data. In 2004 and 2005, the historic survey format and the new unit specific survey format were run simultaneously. Beginning in 2006, only the new unit specific survey format was used. |         |             |             |                  |                |               |                          |
| 2004                                                                                                                                                                                                                                                                                                                                             | 13,656  | 39,865      | 2.9         | 68,647           | 4,103          | 72,750        | 1.7                      |
| 2005                                                                                                                                                                                                                                                                                                                                             | 12,636  | 36,196      | 2.9         | 64,717           | 7,322          | 72,039        | 1.8                      |
| 2006                                                                                                                                                                                                                                                                                                                                             | 30,017  | 86,255      | 2.9         | 216,138          | 20,346         | 236,484       | 2.5                      |
| Dove were separated from the traditional Small Game questionnaire and surveyed using the new Dove and Band-tailed Pigeon questionnaire in 2007. The sample of hunters surveyed was derived for the list of Migratory Bird Stamp purchasers. The data is not comparable to historic data.                                                         |         |             |             |                  |                |               |                          |
| 2007                                                                                                                                                                                                                                                                                                                                             | 14,959  | 49,893      | 3.3         | 85,868           | 4,994          | 90,862        | 1.8                      |

<sup>1</sup> Licensed hunters only; does not include junior harvest.

| Year                                                                                                                                                                                                                                                                                                                                             | Hunters | Hunter Days | Days/Hunter | Licensed Harvest | Junior Harvest | Total Harvest | Harvest/Day <sup>1</sup> |
|--------------------------------------------------------------------------------------------------------------------------------------------------------------------------------------------------------------------------------------------------------------------------------------------------------------------------------------------------|---------|-------------|-------------|------------------|----------------|---------------|--------------------------|
| <b>COTTONTAIL RABBIT</b>                                                                                                                                                                                                                                                                                                                         |         |             |             |                  |                |               |                          |
| 1998                                                                                                                                                                                                                                                                                                                                             | 13,765  | 76,231      | 5.5         | 53,174           | 2,564          | 55,738        | 0.7                      |
| 1999                                                                                                                                                                                                                                                                                                                                             | 14,366  | 62,033      | 4.3         | 59,661           | 2,593          | 62,254        | 1.0                      |
| 2000                                                                                                                                                                                                                                                                                                                                             | 12,447  | 63,039      | 5.1         | 56,429           | 1,129          | 57,558        | 0.9                      |
| 2001                                                                                                                                                                                                                                                                                                                                             | 12,959  | 62,005      | 4.8         | 50,403           | 3,242          | 53,645        | 0.8                      |
| 2002                                                                                                                                                                                                                                                                                                                                             | 10,744  | 56,970      | 5.3         | 43,693           | 1,143          | 44,836        | 0.8                      |
| 2003                                                                                                                                                                                                                                                                                                                                             | 13,614  | 65,741      | 4.8         | 39,092           | 11,968         | 51,060        | 0.7                      |
| 2004                                                                                                                                                                                                                                                                                                                                             | 12,819  | 74,571      | 5.8         | 73,223           | 9,417          | 82,640        | 1.0                      |
| 2005                                                                                                                                                                                                                                                                                                                                             | 18,696  | 93,314      | 5.0         | 77,011           | 3,416          | 80,427        | 0.8                      |
| The Small Game questionnaire was modified to collect unit specific data. Sample no longer weighted in analysis. The data is not comparable to historic data. In 2004 and 2005, the historic survey format and the new unit specific survey format were run simultaneously. Beginning in 2006, only the new unit specific survey format was used. |         |             |             |                  |                |               |                          |
| 2004                                                                                                                                                                                                                                                                                                                                             | 11,329  | 53,276      | 4.7         | 44,642           | 1,470          | 46,112        | 0.8                      |
| 2005                                                                                                                                                                                                                                                                                                                                             | 13,404  | 75,581      | 5.6         | 59,638           | 3,543          | 63,181        | 0.8                      |
| 2006                                                                                                                                                                                                                                                                                                                                             | 12,895  | 78,804      | 6.1         | 80,308           | 3,224          | 83,532        | 1.1                      |
| 2007                                                                                                                                                                                                                                                                                                                                             | 7,015   | 163,222     | 9.6         | 109,781          | 10,398         | 120,179       | 0.7                      |

<sup>1</sup> Licensed hunters only; does not include junior harvest.

# Small Game Harvest Data

## Summary of Small Game Harvest Information (continued)

| Year                                                                                                                                                                                                                                                                                                                                             | Hunters | Hunter Days | Days/Hunter | Licensed Harvest |        |         | Junior Harvest | Total Harvest | Harvest/Day¹ |
|--------------------------------------------------------------------------------------------------------------------------------------------------------------------------------------------------------------------------------------------------------------------------------------------------------------------------------------------------|---------|-------------|-------------|------------------|--------|---------|----------------|---------------|--------------|
|                                                                                                                                                                                                                                                                                                                                                  |         |             |             | Gambel's         | Scaled | Mearns' |                |               |              |
| QUAIL                                                                                                                                                                                                                                                                                                                                            |         |             |             |                  |        |         |                |               |              |
| 1998                                                                                                                                                                                                                                                                                                                                             | 60,639  | 286,954     | 4.7         | 754,211          | 58,765 | 15,532  | 11,750         | 840,258       | 2.9          |
| 1999                                                                                                                                                                                                                                                                                                                                             | 60,104  | 311,586     | 5.2         | 708,764          | 44,595 | 29,200  | 11,671         | 794,230       | 2.5          |
| 2000                                                                                                                                                                                                                                                                                                                                             | 47,885  | 242,432     | 5.1         | 415,487          | 42,201 | 70,081  | 9,433          | 537,202       | 2.2          |
| 2001                                                                                                                                                                                                                                                                                                                                             | 52,432  | 287,878     | 5.5         | 712,215          | 52,204 | 38,556  | 11,584         | 814,559       | 2.8          |
| 2002                                                                                                                                                                                                                                                                                                                                             | 41,312  | 179,413     | 4.3         | 311,997          | 35,889 | 32,695  | 2,872          | 383,453       | 2.1          |
| 2003                                                                                                                                                                                                                                                                                                                                             | 51,511  | 274,155     | 5.3         | 674,652          | 28,795 | 44,250  | 12,192         | 759,889       | 2.7          |
| 2004                                                                                                                                                                                                                                                                                                                                             | 44,142  | 220,032     | 5.0         | 500,739          | 24,129 | 18,532  | 21,577         | 654,977       | 2.5          |
| 2005                                                                                                                                                                                                                                                                                                                                             | 74,991  | 394,749     | 5.3         | 1,455,007        | 55,516 | 33,917  | 23,409         | 1,566,849     | 3.9          |
| The Small Game questionnaire was modified to collect unit specific data. Sample no longer weighted in analysis. The data is not comparable to historic data. In 2004 and 2005, the historic survey format and the new unit specific survey format were run simultaneously. Beginning in 2006, only the new unit specific survey format was used. |         |             |             |                  |        |         |                |               |              |
| GAMBEL'S                                                                                                                                                                                                                                                                                                                                         |         |             |             |                  |        |         |                |               |              |
| 2004                                                                                                                                                                                                                                                                                                                                             | 39,130  | 146,479     | 3.7         | 477,465          |        |         | 5,634          | 483,099       | 3.3          |
| 2005                                                                                                                                                                                                                                                                                                                                             | 45,644  | 192,910     | 4.2         | 861,392          |        |         | 17,478         | 878,870       | 4.6          |
| 2006                                                                                                                                                                                                                                                                                                                                             | 55,736  | 220,938     | 4.0         | 670,407          |        |         | 14,328         | 684,735       | 3.1          |
| 2007                                                                                                                                                                                                                                                                                                                                             | 37,623  | 239,350     | 6.4         | 481,410          |        |         | 7,562          | 488,972       | 2.0          |
| SCALED                                                                                                                                                                                                                                                                                                                                           |         |             |             |                  |        |         |                |               |              |
| 2004                                                                                                                                                                                                                                                                                                                                             | 3,429   | 11,206      | 3.3         |                  | 9,982  |         | 429            | 10,411        | 0.9          |
| 2005                                                                                                                                                                                                                                                                                                                                             | 3,956   | 13,640      | 3.4         |                  | 23,678 |         | 531            | 26,209        | 1.8          |
| 2006                                                                                                                                                                                                                                                                                                                                             | 4,012   | 13,110      | 3.3         |                  | 15,259 |         | 0              | 15,259        | 1.2          |
| 2007                                                                                                                                                                                                                                                                                                                                             | 6,302   | 41,404      | 6.6         |                  | 47,265 |         | 567            | 47,832        | 1.2          |
| MEARNS'                                                                                                                                                                                                                                                                                                                                          |         |             |             |                  |        |         |                |               |              |
| 2004                                                                                                                                                                                                                                                                                                                                             | 4,103   | 17,024      | 4.1         |                  |        | 21,127  | 490            | 21,617        | 1.2          |
| 2005                                                                                                                                                                                                                                                                                                                                             | 3,366   | 10,274      | 3.1         |                  |        | 18,069  | 709            | 18,778        | 1.8          |
| 2006                                                                                                                                                                                                                                                                                                                                             | 6,734   | 36,393      | 5.4         |                  |        | 78,374  | 430            | 78,804        | 2.2          |
| 2007                                                                                                                                                                                                                                                                                                                                             | 6,743   | 34,850      | 5.2         |                  |        | 80,918  | 1,260          | 82,178        | 2.4          |

<sup>1</sup> Licensed hunters only; does not include junior harvest.

| Year                                                                                                                                                                                                                                                                                                                                             | Hunters | Hunter Days | Days/Hunter | Licensed Harvest | Junior Harvest | Total Harvest | Harvest/Day <sup>1</sup> |
|--------------------------------------------------------------------------------------------------------------------------------------------------------------------------------------------------------------------------------------------------------------------------------------------------------------------------------------------------|---------|-------------|-------------|------------------|----------------|---------------|--------------------------|
| <b>TREE SQUIRREL</b>                                                                                                                                                                                                                                                                                                                             |         |             |             |                  |                |               |                          |
| 1998                                                                                                                                                                                                                                                                                                                                             | 7,765   | 20,277      | 2.6         | 41,253           | 1,433          | 42,686        | 2.0                      |
| 1999                                                                                                                                                                                                                                                                                                                                             | 15,039  | 47,201      | 3.1         | 83,574           | 3,413          | 86,987        | 1.8                      |
| 2000                                                                                                                                                                                                                                                                                                                                             | 9,181   | 23,479      | 2.6         | 49,904           | 2,274          | 52,178        | 2.1                      |
| 2001                                                                                                                                                                                                                                                                                                                                             | 8,972   | 23,241      | 2.6         | 39,751           | 5,129          | 44,880        | 1.7                      |
| 2002                                                                                                                                                                                                                                                                                                                                             | 6,473   | 20,353      | 3.1         | 22,914           | 2,022          | 24,936        | 1.1                      |
| 2003                                                                                                                                                                                                                                                                                                                                             | 7,274   | 24,935      | 3.4         | 26,171           | 3,950          | 30,121        | 1.1                      |
| 2004                                                                                                                                                                                                                                                                                                                                             | 6,217   | 14,892      | 2.4         | 14,999           | 2,713          | 17,712        | 1.0                      |
| 2005                                                                                                                                                                                                                                                                                                                                             | 10,755  | 27,201      | 2.5         | 38,442           | 2,410          | 40,852        | 1.4                      |
| The Small Game questionnaire was modified to collect unit specific data. Sample no longer weighted in analysis. The data is not comparable to historic data. In 2004 and 2005, the historic survey format and the new unit specific survey format were run simultaneously. Beginning in 2006, only the new unit specific survey format was used. |         |             |             |                  |                |               |                          |
| 2004                                                                                                                                                                                                                                                                                                                                             | 6,246   | 15,370      | 2.5         | 17,024           | 3,674          | 20,698        | 1.3                      |
| 2005                                                                                                                                                                                                                                                                                                                                             | 7,263   | 29,642      | 4.1         | 31,591           | 3,307          | 34,898        | 1.2                      |
| 2006                                                                                                                                                                                                                                                                                                                                             | 5,946   | 14,543      | 2.4         | 18,985           | 3,654          | 22,639        | 1.6                      |
| 2007                                                                                                                                                                                                                                                                                                                                             | 9,138   | 29,430      | 3.2         | 40,018           | 2,458          | 42,476        | 1.4                      |

<sup>1</sup> Licensed hunters only; does not include junior harvest.

| Year                                                                                                                  | Hunters | Hunter Days | Days/Hunter | Licensed Harvest | Harvest/Day <sup>1</sup> |
|-----------------------------------------------------------------------------------------------------------------------|---------|-------------|-------------|------------------|--------------------------|
| <b>BLUE GROUSE</b>                                                                                                    |         |             |             |                  |                          |
| The Small Game questionnaire was modified to collect unit specific data. The data is not comparable to historic data. |         |             |             |                  |                          |
| 2004                                                                                                                  | 980     | 2,511       | 2.6         | 367              | 0.15                     |
| 2005                                                                                                                  | 1,004   | 3,336       | 3.4         | 295              | 0.09                     |
| 2006                                                                                                                  | 860     | 1,934       | 2.2         | 287              | 0.15                     |
| 2007                                                                                                                  | 945     | 2,899       | 3.1         | 630              | 0.22                     |

| Year                                                                                                                  | Hunters | Hunter Days | Days/Hunter | Licensed Harvest | Harvest/Day <sup>1</sup> |
|-----------------------------------------------------------------------------------------------------------------------|---------|-------------|-------------|------------------|--------------------------|
| <b>CHUKAR PARTRIDGE</b>                                                                                               |         |             |             |                  |                          |
| The Small Game questionnaire was modified to collect unit specific data. The data is not comparable to historic data. |         |             |             |                  |                          |
| 2007                                                                                                                  | 252     | 819         | 3.3         | 189              | 0.23                     |

## Small Game Harvest Data

### *Summary of Small Game Harvest Information (continued)*

| Year                                                                                                                                                                                                                                                                                                    | Hunters | Hunter Days | Days/Hunter | Licensed Harvest | Junior Harvest | Total Harvest | Kill/Day <sup>1</sup> |
|---------------------------------------------------------------------------------------------------------------------------------------------------------------------------------------------------------------------------------------------------------------------------------------------------------|---------|-------------|-------------|------------------|----------------|---------------|-----------------------|
| <b>BAND-TAILED PIGEON</b>                                                                                                                                                                                                                                                                               |         |             |             |                  |                |               |                       |
| 2004                                                                                                                                                                                                                                                                                                    | 612     | 1,531       | 2.5         | 919              | 0              | 919           | 0.6                   |
| 2005                                                                                                                                                                                                                                                                                                    | 590     | 886         | 1.5         | 1,122            | 0              | 1,122         | 1.3                   |
| 2006                                                                                                                                                                                                                                                                                                    | 501     | 1,791       | 3.6         | 2,006            | 0              | 2,006         | 1.1                   |
| Band-tailed pigeons were separated from the traditional Small Game questionnaire and surveyed using the new Dove and Band-tailed Pigeon questionnaire in 2007. The sample of hunters surveyed was derived for the list of Migratory Bird Stamp purchasers. The data is not comparable to historic data. |         |             |             |                  |                |               |                       |
| 2007                                                                                                                                                                                                                                                                                                    | 647     | 1,595       | 2.5         | 1,757            | 324            | 2,081         | 1.3                   |

### *Summary of Willow Springs Quail Check Station Data*

|                     | 2005-06 | 2006-07 | 2007-08 | 2008-09 |
|---------------------|---------|---------|---------|---------|
| No. of Hunter Days  | 214     | 323     | 62      | 133     |
| No. of Quail Bagged | 614     | 202     | 120     | 264     |
| No. of Gambel's     | 609     | 181     | 114     | 222     |
| No. of Scaled       | 5       | 3       | 6       | 0       |
| Quail Per Day       | 2.9     | 0.6     | 1.8     | 2.0     |

|                               | Gambel's | Scaled | Gambel's | Scaled | Gambel's | Scaled | Gambel's | Scaled |
|-------------------------------|----------|--------|----------|--------|----------|--------|----------|--------|
| No. of Adult Quail Classified | 129      | 1      | 108      | 1      | 66       | 2      | 25       | 0      |
| No. of Young Quail Classified | 240      | 1      | 29       | 1      | 40       | 3      | 96       | 0      |
| Percent Young in the Bag      | 65       | —      | 21       | —      | 38       | —      | 79       | —      |

### *Summary of Freeman Road Quail Check Station Data*

|                     | 2005-06 | 2006-07 | 2007-08 | 2008-09 |
|---------------------|---------|---------|---------|---------|
| No. of Hunter Days  | 256     | 248     | 161     | 131     |
| No. of Quail Bagged | 675     | 219     | 162     | 270     |
| No. of Gambel's     | 675     | 219     | 162     | 234     |
| No. of Scaled       | 0       | 0       | 0       | 0       |
| Quail Per Day       | 2.6     | 0.9     | 1.0     | 2.1     |

|                               | Gambel's | Gambel's | Gambel's | Gambel's |
|-------------------------------|----------|----------|----------|----------|
| No. of Adult Quail Classified | 73       | 50       | 61       | 26       |
| No. of Young Quail Classified | 272      | 21       | 32       | 138      |
| Percent Young in the Bag      | 79       | 30       | 34       | 84       |

### *Summary of Punkin Center Quail Check Station Data*

|                    | 2005-06 | 2006-07 | 2007-08 | 2008-09 |
|--------------------|---------|---------|---------|---------|
| No. of Hunter Days | 218     | 94      | —       | 102     |
| No. of Gambel's    | 1436    | 184     | 69      | 285     |
| Quail Per Day      | 6.6     | 2.0     | —       | 2.8     |

|                               | Gambel's | Gambel's | Gambel's | Gambel's |
|-------------------------------|----------|----------|----------|----------|
| No. of Adult Quail Classified | 228      | 64       | 11       | 30       |
| No. of Young Quail Classified | 1139     | 38       | 4        | 116      |
| Percent Young in the Bag      | 83       | 37       | —        | 79       |

## Small Game Harvest Data

### *Mearns' Quail Wing Barrel Data - Reported Data*

| Year | # of Birds Harvested | # of Hunter Days | Birds/Day | Hours Hunted | % Juvenile | Birds/Hour |
|------|----------------------|------------------|-----------|--------------|------------|------------|
| 1977 |                      |                  |           |              |            |            |
| 1978 |                      | 34               |           | 192          | 77.2       |            |
| 1979 | 142                  | 135              | 1.1       | 526          | 59.5       | 0.27       |
| 1980 |                      |                  |           |              |            |            |
| 1981 | 101                  | 113              | 0.9       | 488          | 84.9       | 0.21       |
| 1982 | 90                   | 44               | 2.0       |              | 76.7       |            |
| 1983 |                      | 144              | 0.0       | 546          | 83.7       |            |
| 1984 | 1047                 | 277              | 3.8       | 1173.5       | 80.9       | 0.89       |
| 1985 | 1068                 | 367              | 2.9       | 1513.5       | 68.4       | 0.71       |
| 1986 | 509                  | 181              | 2.8       |              | 69.4       |            |
| 1987 | 332                  | 188              | 1.8       | 764.5        | 71.5       | 0.43       |
| 1988 | 644                  | 305              | 2.1       | 1521.5       | 83.4       | 0.42       |
| 1989 | 244                  | 213              | 1.1       | 810          | 55.9       | 0.30       |
| 1990 | 421                  | 195              | 2.2       | 943          | 79.7       | 0.45       |
| 1991 | 750                  | 319              | 2.4       | 1437.3       | 75.6       | 0.52       |
| 1992 | 703                  | 256              | 2.7       | 1199         | 78.4       | 0.59       |
| 1993 | 275                  | 172              | 1.6       | 814.5        | 72.9       | 0.34       |
| 1994 | 202                  | 133              | 1.5       | 590          | 45.6       | 0.34       |
| 1995 | 115                  | 150              | 0.8       | 606.5        | 75.3       | 0.19       |
| 1996 | 153                  | 142              | 1.1       | 697          | 75.2       | 0.22       |
| 1997 | 166                  | 128              | 1.3       | 494.5        | 71.1       | 0.34       |
| 1998 | 236                  | 132              | 1.8       | 539          | 72.7       | 0.44       |
| 1999 | 642                  | 226              | 2.8       | 1015         | 75.5       | 0.63       |
| 2000 | 1312                 | 414              | 3.2       | 1710.25      | 73.8       | 0.77       |
| 2001 | 888                  | 297              | 3.0       | 1199.5       | 79.7       | 0.74       |
| 2002 | 361                  | 133              | 2.7       | 608          | 74.1       | 0.59       |
| 2003 | 606                  | 218              | 2.8       | 937          | 77.6       | 0.65       |
| 2004 | 399                  | 142              | 2.8       | 486          | 73.5       | 0.82       |
| 2005 | 591                  | 186              | 3.2       | 735          | 69.4       | 0.80       |
| 2006 | 778                  | 217              | 3.6       | 766          | 81.9       | 1.02       |
| 2007 | 2295                 | 539              | 4.3       | 2044         | 72.7       | 1.12       |

---

# Predators

---

Predatory mammals as defined by A.R.S. 17-101 are coyotes, bobcats, foxes, and skunks. Bobcats are the only predator also classified as a fur-bearer with an export tag required to ship a bobcat pelt out of state. There are no closed seasons or bag limits on any predator.

A word of caution: because of small sample sizes and vagaries in the sample frame of the hunt questionnaires, caution should be used in interpreting the annual harvests of both predators and furbearers. Most of these data are insufficient for making year-to-year comparisons, and are useful only in determining long-term harvest trends.

## Coyotes

Arizona's premier predator is also an important fur resource. Found throughout Arizona, the coyote is probably the state's most familiar animal. Even where coyotes are not often seen, campers can hear their choruses of howls, yelps, and barks on almost any night. The animal's pointed ears, narrow nose, generally brown coat color, and black-tipped tail, which is usually held downward, help differentiate coyotes from dogs and wolves. The head and body length of coyotes is about 2 to 3 feet with the tail adding another foot or so. Adult males are larger than females, the two sexes averaging about 21 and 17 pounds, respectively. A very large male may attain a weight of 35 pounds. Contrary to popular belief, coyotes do not readily interbreed with either dogs or wolves.

### *Natural History*

Coyotes are opportunists, feeding mainly on small mammals, but also on carrion, bird eggs, and vegetable matter such as manzanita and juniper berries. They also prey on pronghorn fawns, dead fish, and insects when

such items are available (This is a peculiar choice of options). In urban areas, garbage, domestic cats, and small dogs are sometimes taken.

Coyotes form strong pair bonds, usually breeding between mid-January and March 15. After a two-month gestation period, from one to several young are born in a den or burrow; the average litter size being about five pups. The pups are fed regurgitated food by both parents. They leave the den when about 8 to 10 weeks old.

A coyote's home range may encompass up to 12 square miles during the spring and summer, with individual animals roaming up to 100 miles or more. Besides the ever-present threat of starvation, coyotes are also susceptible to diseases such as rabies and mange and human-caused mortality.

### *Hunting and Trapping History*

The sport harvest of coyotes has been relatively stable during the past 10 years, about 13,000 hunters taking an average of between 30,000 and 40,000 coyotes a year. Most of these animals are taken while "varmint

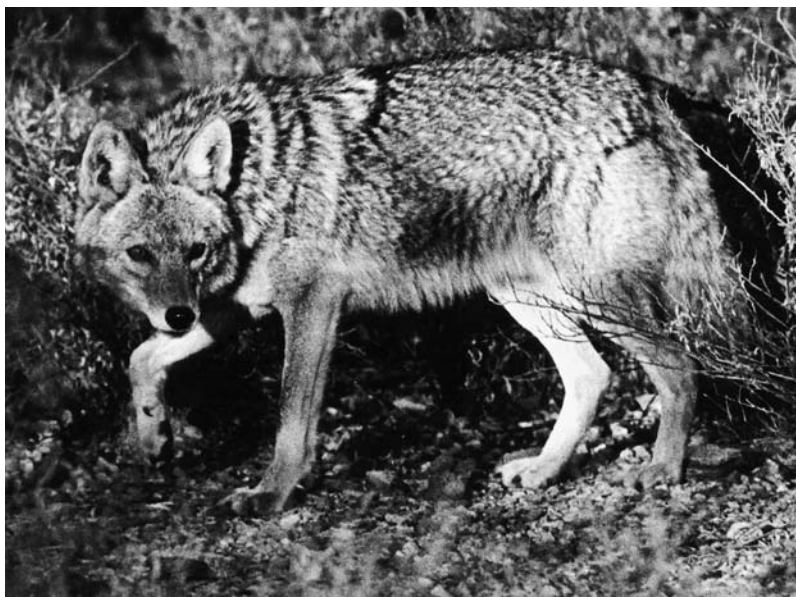

Coyote

BOB MILES

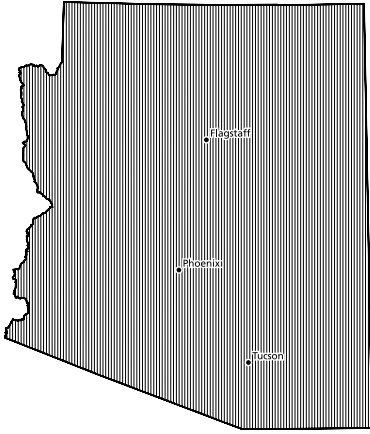

**Coyote and bobcat distribution**

calling,” while hunting other game, or simply as opportunities arise. Formerly, trappers rivaled sport hunters in the number of coyotes taken, but the reported take of trapped coyotes during the past 10 years has averaged only a little more than 1,000

a year—a far cry from the yearly harvests of 10,000 or more coyotes reported in the late 1970s. Although some of this decline may be due to coyote population vagaries, the principal reason for this reduced take is undoubtedly a decline in trapping effort.

### Bobcats

Found throughout the state in broken and brushy country, the bobcat, sometimes called wildcat, while rarely seen, is Arizona’s most common wild feline. Usually an overall orange to gray in color with black markings, these medium-sized cats have a length of from

2 to 2 feet and weigh between 12 and 30 pounds. The underparts are whitish, and small ear tufts are usually present. The bobcat’s most distinguishing characteristic, however, is its short, 5 inch tail, which is always less than  $\frac{1}{4}$  of the length of its head and body. This feature, coupled with the animal’s black spotting, can be used to distinguish bobcats from any other feline in Arizona, wild or domestic.

#### *Natural History*

Little is known about Arizona’s bobcats. Their principal prey are cottontail rabbits and jackrabbits, but they also take both smaller mammals such as pack rats and larger mammals including the young of some big game species. Snakes and lizards are also part of the bobcat’s diet.

Bobcats require two years to mature and attain breeding age. The breeding season in Arizona is poorly documented, but appears to be mostly in late winter or early spring. The gestation period is from 50 to 60 days so that the one to three young are usually born in spring or early summer. As in most cats, the female raises the kittens alone, nursing them for two months before teaching them to hunt on their own.

#### *Hunting and Trapping History*

Sport hunters report taking between 1,200 and 1,300 bobcats a year. Most of these animals are taken while pursuing other game or by predator calling. This harvest appears relatively stable when compared to the numbers of bobcats trapped and tagged for export. Ten years ago the numbers of bobcats reportedly harvested and trapped were about equal, and 20 years ago the number of bobcats trapped was approximately seven times that taken by sport hunters. As recently as 1987, the number of bobcats trapped was reported to exceed 6,500, and more than 5,000 export tags were issued to trappers and fur dealers wanting to ship bobcat pelts out of state (Table 3). Fewer than 500 bobcats have reportedly been trapped each year since 1994.

### Foxes

There are three species of foxes in Arizona—the red fox, kit fox, and gray fox. Of these, the 5- to 9-pound gray fox with its rust, black, and grizzled coloring and black longitudinally striped tail is by far the most common, occurring wherever there are mountains, wooded country, and broken terrain. The yellowish and paler red fox is of similar size (2-foot head and body with a 12

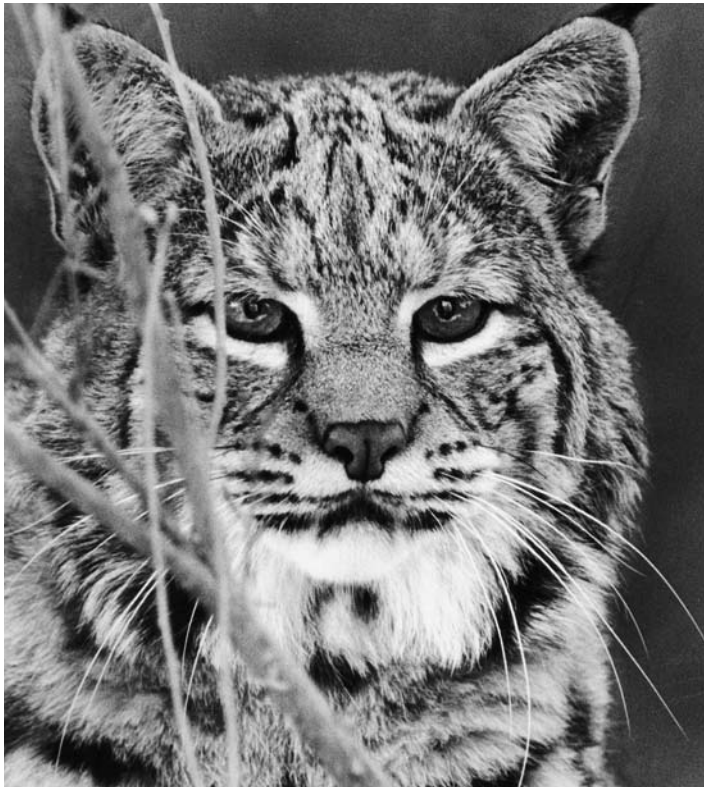

BOB MILES

**Bobcat**

to 16 inch tail) but is uncommon in Arizona, occurring only in the northeast portions of the state. It can be differentiated from other foxes by its white-tipped tail and black ears. The 15 to 20 inch long kit fox has large, out-sized ears, a 9- to 12-inch tail, and weighs less than 4 pounds. This diminutive fox is pale gray or buff in color, with a black-tipped tail. It is most often seen at night in valleys and on sandy plains in the southwestern deserts. For all three species, the sexes are similar in size and pelage.

### *Natural History*

Gray foxes are the most often seen fox in that they are the most numerous species and are often active during daylight hours. And, although they favor brushy habitats, rock piles, and desert washes, they also climb trees and can be found in wooded areas. Kit foxes, on the other hand, prefer sandy areas, are almost exclusively nocturnal, and spend much of the day underground.

### *Hunting and Trapping History*

More than 95 percent of the foxes taken and trapped in Arizona are undoubtedly the widely spread gray fox, the red fox occurring mostly on the Navajo Indian Reservation. Although kit foxes are remarkably easy to trap, their fur is of little value. Whatever the species, the annual take of about 3,500 foxes by predator callers and incidental hunters has been relatively stable in recent years despite any population changes due to rabies

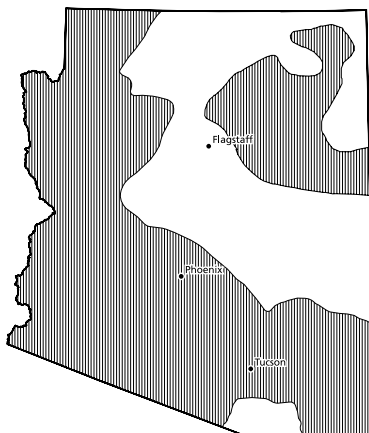

**Kit fox distribution**

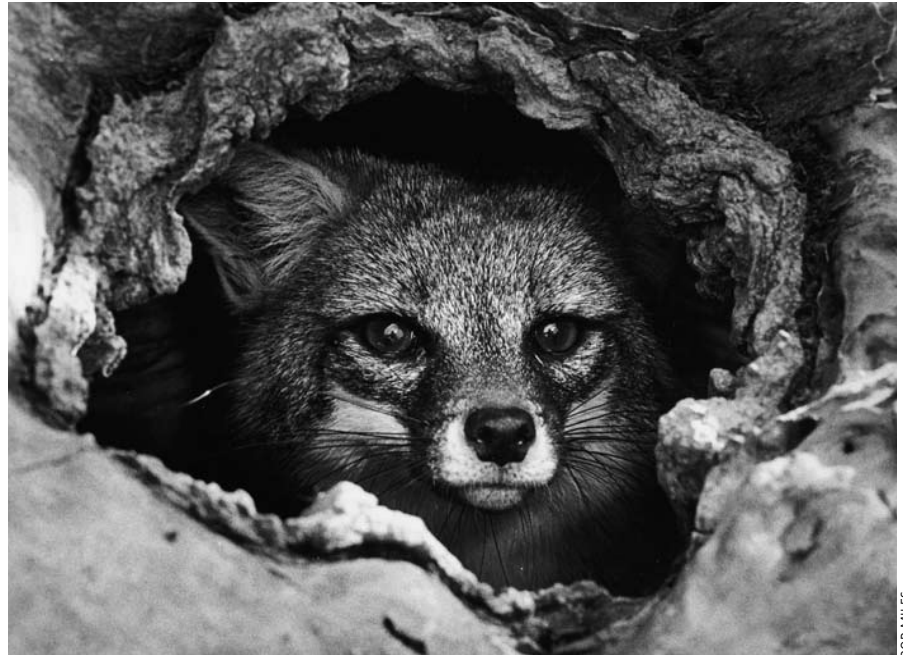

**Gray fox**

BOB MILES

## **Skunks**

At least four species of skunks are found in Arizona. All of the species have scent glands on either side of their anal sphincter which secrete a secretion of musk that gives them their malodorous reputation. This defensive reaction and their striking white on black color patterns are usually enough to deter all but the most determined predator. Omnivorous, mostly nocturnal foragers, skunks are highly susceptible to the rabies virus. Indeed, early Arizonans so associated rabies with skunks that some species were termed "hydrophobia cats."

The most common of the species by far is the cat-sized striped skunk that occurs throughout Arizona and constitutes the vast majority of the road-killed mammals seen on the state's highways. The striped skunk is not only Arizona's most frequently seen skunk, it is also the largest. Weights range from about 2 pounds for an adult female to an occasional 10 pounds or more for an obese male. The species always displays a thin white stripe on its face, even though the striping pattern may vary between individuals and populations. The usual markings, however, are two lateral stripes that form a chevron, merging toward the back of the head. The tail, which usually shows some white, is always shorter in length than the approximately foot-long body. Although "stripees" live almost everywhere but in the most extreme deserts, they are most often found near water. These skunks are active throughout the year and do not hibernate even in northern Arizona; the males instead form communal dens with several females.



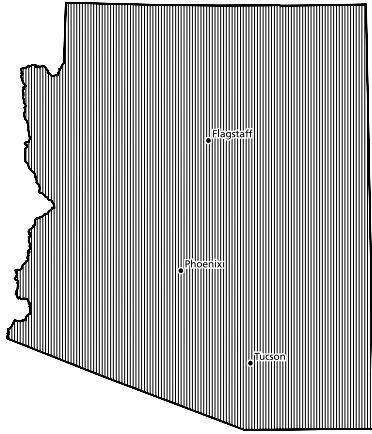

**Gray fox, striped skunk, and spotted skunk distribution**

than the striped skunk, hooded skunks weigh from 1 to 2 pounds and have a 12 to 16 inch long body. As for all species of skunks found in Arizona, the males are larger than the females. The white stripes on this animal are often solidly joined to form one large white streak down the center of the back, or in some individuals, are so totally separated that the skunk appears nearly solid black. The hooded skunk also differs from the striped skunk in that its foot-long tail is longer than its body. Both animals have the thin white stripe on the face and have the same general preferences for riparian habitats.

There is no problem distinguishing the western spotted skunk, also known as the civet. The average length of this diminutive fellow, including the tail, is only about 15 inches. Females average less than a pound; males are about a pound and a half. This skunk is also faster and more agile than its larger cousins. The spotted skunk's overall color is black with a white triangular patch on the forehead and a white spot under each ear. Five or six broken white stripes run down the neck, back, and sides, giving the impression of blotches or spots, and the animal its name. The animal's hair is finer than that of the other species, and the tail is tipped in white.

Although reported from every county in Arizona, the spotted skunk appears to favor rocky, mountainous areas.

The large, 2- to six-pound hog-nosed skunk is also easily identified by its entirely white back and tail and lack of any stripe on the forehead.

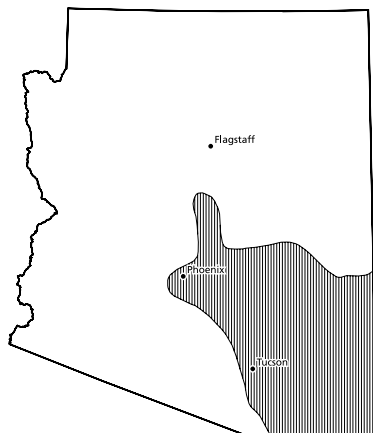

**Hooded skunk distribution**

The closely related hooded skunk is the striped skunk's Mexican counterpart. It is generally confined to southeastern Arizona, although specimens have reportedly been taken as far north as Flagstaff and the Mogollon Rim.

Somewhat leaner

Moreover, the elongated and slightly up-turned snout is largely naked, and the long claws on the feet are almost bear-like in appearance. This species occurs primarily in southeastern Arizona although specimens have been obtained from as far north as Flagstaff and the Hualapai Mountains.

## Natural History

All of the skunks are more or less omnivores, feeding on grasshoppers and other insects, grubs, worms, mice, lizards, bulbs, carrion, and garbage. Some individuals even take to raiding hen houses, taking not only the eggs, but chickens as well. Even the hog-nosed skunk, which digs for most of its food, will eat fruits and carrion on occasion.

The striped, hooded, and hog-nosed skunks all mate in late winter and early spring, and produce from two to four young in April or May. The spotted skunk breeds in late September and early October, but the fertilized egg remains in a state of arrested development until March or April when implantation occurs with the two to four young being born about a month later. The young of all the skunk species are raised and on their own by early fall. Few skunks live more than a year or two.

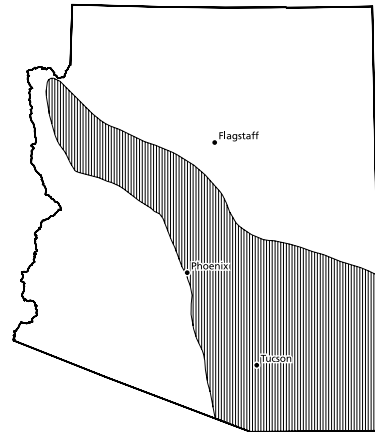

**Hog-nosed skunk distribution**

## Trapping History

Formerly a major furbearer, striped skunks in Arizona have dropped in average take to fewer than 100 per year since 1995. This is in some ways unfortunate, as uncontrolled populations of these animals are prone to rabies and constitute a health hazard to other carnivores, as well as to humans. Although the amount is undoubtedly small, it would be interesting to know what percent of the number of skunks trapped constitutes spotted and hog-nosed skunks.

---

# Furbearers

---

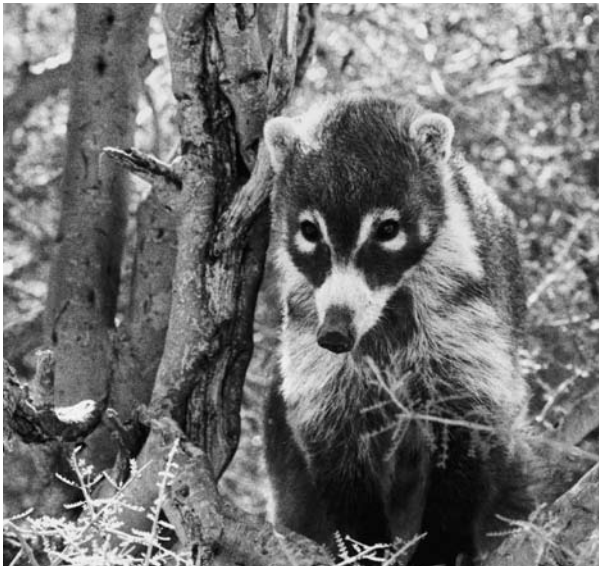

GEORGE ANDREIKO

## Coati

Fur-bearing mammals are defined as muskrats, raccoons, otters, weasels, bobcats, beavers, badgers, and ringtails. Of these, only the bobcat is also considered a predatory animal. All mammals not classified as game mammals, predatory animals, or furbearers are considered “nongame mammals.” These include opossums, coatis, black-footed ferrets, Gunnison’s prairie dogs, black-tailed prairie dogs, wolves, jaguars, ocelots, and porcupines. Of these, only Gunnison’s prairie dogs and coatis may be taken during an open season, with the bag limit on coatis being one per calendar year. No season for the taking of jaguars, ocelots, wolves, or porcupines exists.

## Beaver

There is no mistaking a beaver—no other Arizona rodent even comes close to weighing between 30 and 60 pounds and exceeding two feet in length. Moreover, the beaver is uniquely adapted to an aquatic existence with a flattened, naked, nine to 10 inch long, oar-like tail, webbed hind feet, dense fur, and eyes positioned high on the head. Both sexes are similar in size and possess pungent scent glands called “castors” on either

side of their anus. Arizona specimens are typically a light yellowish cinnamon color in contrast to the browner animals found in other states.

Beavers were at one time found nearly everywhere in Arizona that there was permanent water. With settlement, and the desiccation of the state’s streams, beaver populations declined. This habitat loss, and in some cases, heavy trapping pressure, caused beavers to disappear from such former strongholds as the San Pedro and Santa Cruz rivers. Introductions and natural colonizations have since enabled the beaver to recover much of its former distribution, if not numbers, and these animals can now be found along several permanent streams, some of the larger river stretches, certain shallow lakes, and even a few dirt-lined canals.

## Natural History

The beaver’s diet is almost exclusively plant material with the bark of cottonwoods, aspen, and willow trees being especially important. Other reported foods include tamarisk or salt-cedar, mesquite, and the roots of such tuberous aquatic plants as cattail and bulrush. Even in those places where beavers are rarely seen, their activities are conspicuous—chiseled and felled trees, brush dams along small streams and backwaters, and stick houses or “lodges” constructed either as a separate residence or within the beaver dam itself. Even more common are

“bank houses,” dens excavated in river or canal banks. Whatever its construction, the den will be located above the water line, lined with cattails and grasses, and will provide a nursery area for the two to four “kits” or young beavers born in the spring.

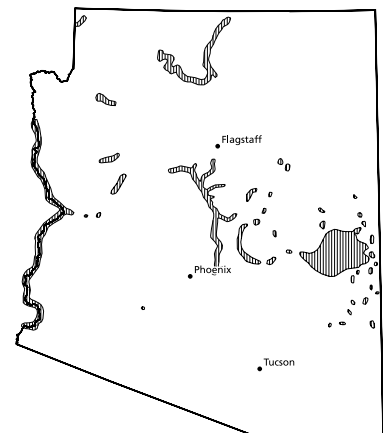

Beaver distribution

## Trapping History

The average annual number of beavers trapped greatly declined since 1991 and is now virtually insignificant. Even if the fur market recovers, this species will probably never again be an important fur-bearer in Arizona due to the limitations on trapping and the limited areas of quality beaver habitat remaining.

## Muskrat

A large water vole, this rodent is about a foot long with thick, silky fur and a naked, eight to 11 inch tail flattened on the side. The sexes are similar in size and weigh from 2 to 4 pounds. Most muskrats in Arizona are rusty reddish brown in color; young animals are darker than the adults, some being nearly black. Although the muskrat is highly adapted to an aquatic existence, its hind feet, while comparatively large, are not webbed like those of a beaver's.

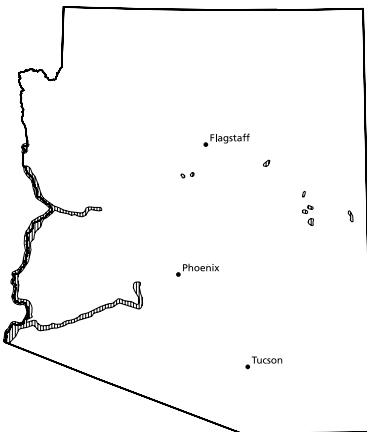

### Muskrat distribution

Well and Peck's Lake off of the Verde River), muskrats have disappeared from some areas (e.g., the San Pedro River) and invaded others.

## Natural History

Primarily a vegetarian, the muskrat feeds on aquatic grasses, pondweed, cattail roots, and the leaves of seep willows. Although many muskrats live in bank burrows, these animals also construct distinctive conical houses of shredded cattails and other marsh vegetation in quiet waters. These dens, which may serve as feeding areas, shelter areas, or nursery sites are all entered through submerged passageways. The nursery dens are the most elaborate, typically consisting of several chambers some of which are lined with grass and soft vegetation.

Muskrats in Arizona are reported to breed during every month of the year, but most of the young are born

between March and October. The usual litter size is five or six.

## Trapping History

Muskrats were never an important fur animal in Arizona, and the number trapped has been virtually nil since the late 1980s. Given the low state of the fur market and the limited distribution of this aquatic mammal, this status is likely to continue.

## Raccoon

This medium sized carnivore is readily identified by its heavy-set body, grizzled brownish-gray appearance, black facial mask, and banded tail. The sexes are similar and measure from about 1 foot to 2 ½ feet in length with an eight to 12 inch tail that is alternately ringed in light and dark. Weights range from about 12 to 35 pounds.

A relatively common animal along Arizona's perennial streams, lakes, and reservoirs, raccoons can also be found near some of the larger stock tanks and in rural areas where permanent water is available. Although not often seen in the wild because of its nocturnal habits, the raccoon's distinctive five-toed tracks are commonly observed in mud around stock tanks and along river courses. These animals are adept climbers as well as swimmers.

Raccoons are omnivores, eating whatever food is available—aquatic insect larvae, beetle grubs, fish, frogs,

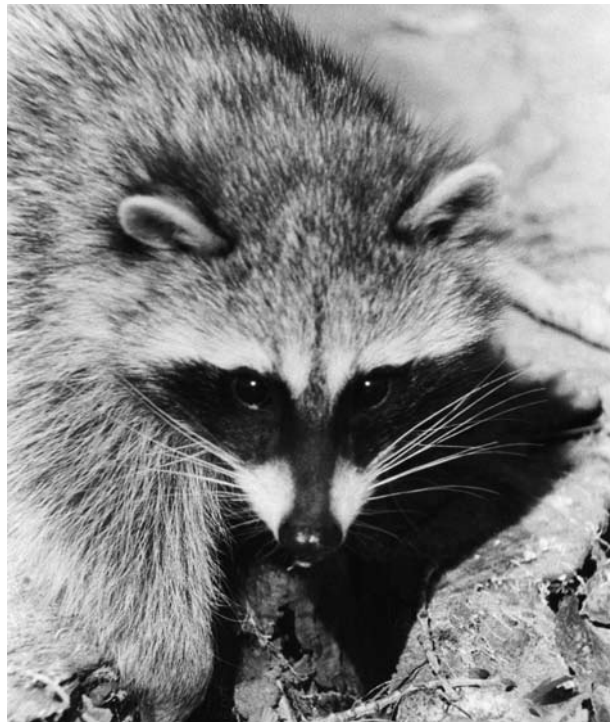

PATO BREN

### Raccoon

crayfish, wild fruits, and even carrion. In certain areas, these animals can be a nuisance, not only raiding garbage cans, but also committing depredations on poultry houses, corn fields, and fruit trees. Nonetheless, raccoon meat is considered edible by some people, and the animal is considered more a game species than a furbearer.

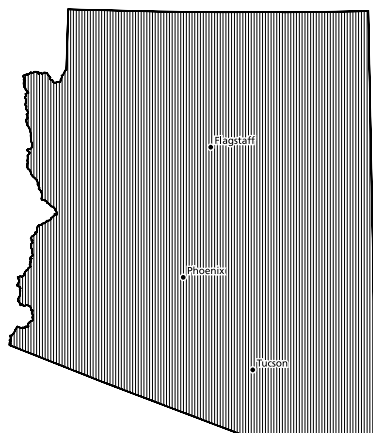

**Raccoon and ringtail distribution**

### *Natural History*

Raccoons have been little studied in Arizona, and their life history here is not well documented. The two to five young are presumably born in spring in a den that may be located in a rocky crevice, brush-pile, or hollow tree. The young remain with the female until the fall when they are left to find their own way in the world.

### *Trapping and Hunt History*

Both pursued with dogs as game, and trapped as a furbearer, the raccoon is somewhat unique in that it is the only animal in Arizona that can be legally taken with a firearm at night. Because of their limited distribution near water, "coons" have never been important furbearers, and annual harvests from trapping have rarely exceeded 1,000 pelts. With the decline in trapping activity over the past 10 years, this take has been reduced to only a few dozen raccoons a year. Although its nocturnal habits make for few incidental takings, the raccoon's status as a game animal appears more stable. Hunt questionnaire data from general license buyers indicate an annual harvest of another 1,200 animals a year. Most of this harvest is undoubtedly by hunters with hounds.

## Ringtail

Ringtails have long, slender bodies from 14 to 16 inches in length with bushy, equally long black and white banded tails. The fur is a soft grayish brown with black-tipped hairs. Both the ears

and eyes appear oversized, and the latter are outlined in white making them seem even larger. The legs are short, and the hind feet can be rotated 180 degrees like those of a tree squirrel, enabling the animal to descend vertical surfaces. Weights vary from 2 to 3 pounds, the males being slightly larger than the females. Primarily a night-time animal, ringtails can be extremely bold and unconcerned about the presence of humans. Calls consist of a repertoire of barks, chirps, growls, howls, and yips.

Ringtails are most common in the rocky regions of southern and western Arizona with the Grand Canyon being especially favored with the presence of these animals. About the only areas devoid of ringtails are flat, alluvial valleys in that the animal prefers rocky hill-sides, canyons, rock-walled houses, and mine shafts.

### *Natural History*

The ringtail's diet varies with the seasons but usually consists of small mammals, birds, lizards, and insects, as well as plant fruits, e.g., tomatillo berries. In farm areas, the ringtail may be an important predator on chickens and other poultry. Generally, four young are born in the spring.

### *Trapping History*

Not having a particularly valuable pelt, the relatively easily trapped ringtail is most often trapped during times when fur prices and trapping activity are high. These animals can also be quite common, and in past years ringtails contributed substantially to the state's fur harvest. The take in ringtails has dropped off significantly in recent years, however, and now consists of only a couple of dozen animals.

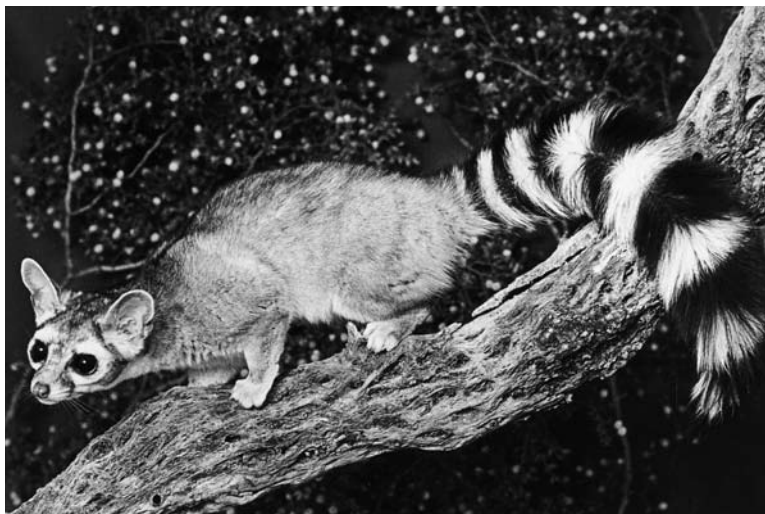

**Ringtail**

BOB MILES

## Otter

Wonderfully adapted to an aquatic existence, the otter's elongated body terminates in a streamlined tail that tapers from a thick base to a pointed tip. Also contributing to the otter's fusiform shape is its flat-

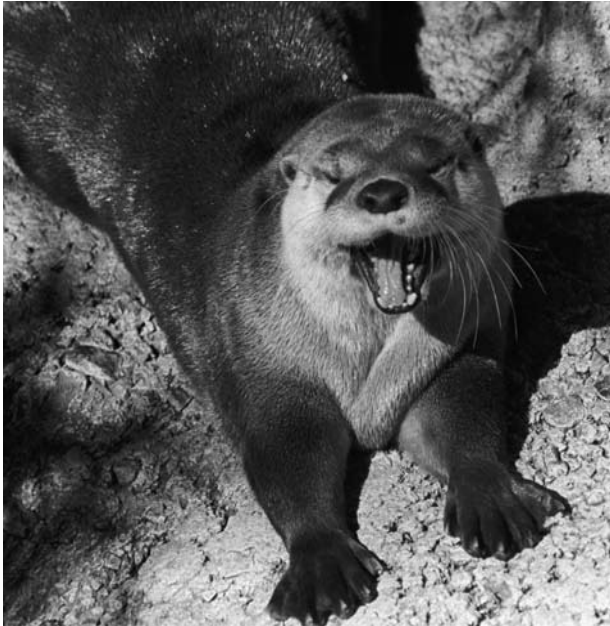

BOB MILES

### Otter

tened head and small ears, the openings of which can be closed at will. The legs too are short, and the hind feet are webbed to the toes. The color of the densely furred coat is a rich chocolate brown with whitish underparts. Adults generally weigh from 12 to 20 pounds with lengths ranging from about 3 feet to just over 4 feet. The otter's webbed, rhomboid tracks are easily distinguishable from the also webbed, but elongated hind tracks of the beaver.

Once found throughout the Salt, Verde, Little Colorado, and probably also the Gila, and Colorado river systems, this species is now confined to the Verde River and its major tributaries where it was reintroduced in the early 1980s.

### Natural History

Although most otter activity is at night, hunting is by sight as well as touch, and clear streams appear to be favorite haunts. The otter's usual fare is fish, waterbirds, turtles, eggs, and crawfish, the latter now being the most conspicuous food item in their droppings.

The breeding season in Arizona is uncertain, but otters elsewhere usually breed in late winter or early spring. Mating usually occurs in the water. Pregnancy lasts about two months, but because of delayed implantation gestation may take up to a year. Dens are located

in natural shelters under rocks, logs, flood debris, or in river banks. Litter sizes vary, but usually consist of two or three pups. Weaning requires approximately three months, after which the young disperse.

### Trapping and Hunt History

Otters were never numerous enough in Arizona to provide an important fur resource, although old photos show these animals being trapped and otherwise taken for their pelts prior to 1930. Secondhand reports indicate that some otters may also have been killed as fish predators. Whatever its past status, this species is now completely protected in Arizona and has been for many years.

## Weasel

Only one species of weasel occurs in Arizona—the long-tailed weasel, which is readily identified by its dark brown coat and orangish underparts. Some white is often present on the head, and some animals may turn all white in winter. Male weasels are larger than the females, the animals ranging in length from 8 to 10 inches with the black-tipped tail adding another 4 to 6 inches. Weights range from 7 to 12 ounces for males and from 3 to 7 ounces for females. Voice is a high-pitched shriek.

Weasels in Arizona are largely restricted to high elevation wooded areas such as the Kaibab Plateau, Mogollon Rim, Chuska-Lukachukai mountains, and southern Arizona's sky-islands.

### Natural History

Weasels are voracious predators, taking cottontail rabbits, hares, and rodents much larger than themselves. They also take birds, snakes, and lizards.

Weasels breed in midsummer, but, because of delayed implantation, the four to eight young are not born

until the following spring. Usually nests in old burrows or under rock piles and other debris.

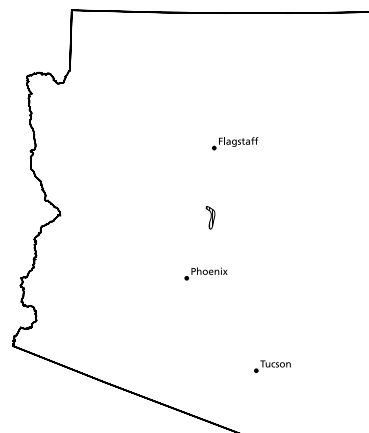

Otter distribution

### Trapping

### History

No record is kept of the number of trappers who claim to take this animal. The number of

weasels trapped in Arizona is assumed to be very low, however, due to the animal's limited distribution and numbers, small pelt, and the current low number of trappers.

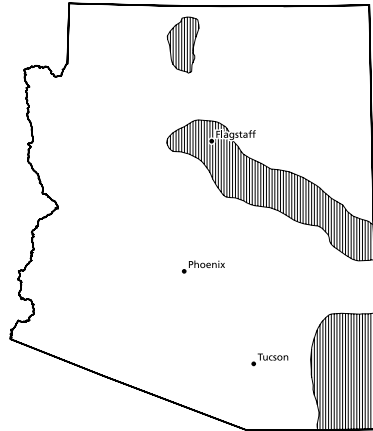

**Long-tailed weasel distribution**

## Badger

A short, squat, medium-sized member of the weasel family, the badger is readily recognized by its grizzled gray, white, and black fur, cheek stripes, short legs, long claws, and the white stripe down its head and back. Adults may weigh from about 10 to 20 pounds and are approximately 20 inches long, with the tail adding another 4 to 6 inches in length. Widely distributed, the badger occurs almost anywhere in Arizona having ground suitable to dig in and excavate burrows.

### *Natural History*

Badgers feed primarily on burrowing rodents such as prairie dogs and ground squirrels but also take snakes, lizards, and insects on occasion. Mating in these usually solitary animals takes place in the summer, the young being born the following spring due to delayed implantation. Primarily a nocturnal animal, badgers are sometimes encountered during the early morning hours.

### *Trapping History*

Although the take of badger pelts averaged more than a 1,000 a year in the late 1970s and early 1980s, the

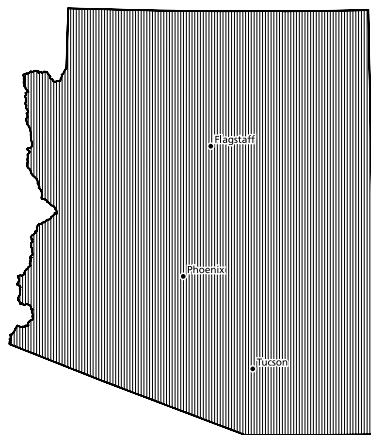

**Badger distribution**

number of these animals recently trapped in Arizona is virtually insignificant. A few badgers are undoubtedly also taken incidental to pursuing other game, but these numbers too must be very small. Probably less than 50 badgers a year are taken in the state.

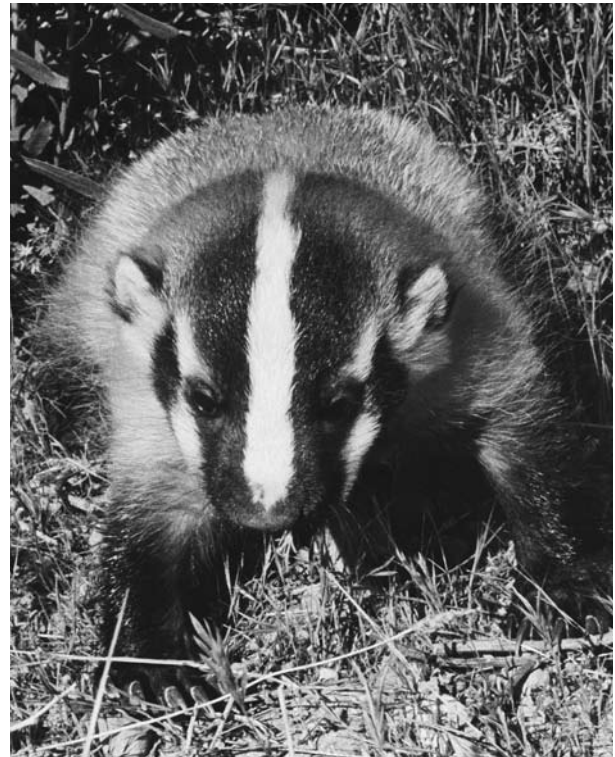

**Juvenile badger**

## Trapping

Trapping has had a long and interesting history in Arizona. Indeed, the first Anglo-American explorers to Arizona were trappers who worked the state's waterways for beaver in the 1820s and 1830s. Since that time, the popularity of trapping has fluctuated widely with the vagaries of the fur trade, the numbers of trappers and animals trapped increasing when fur prices were high, and decreasing when numbers were low. The popularity of beaver skin hats prior to 1850 fueled the early interest in trapping beaver in the Gila and Colorado river systems. Raccoon coats were popular in the 1920s as were a number of other furs. The most recent surge in trapping activity in Arizona was generated by prohibitions in the trade of spotted Neotropical cats during the 1970s. Spotted cat fur was then being highly used by foreign fashion houses as trim on ladies coats. This ban increased the demand and price for legal spotted cats, and the prices paid for bobcat pelts soared through the mid-1980s when they plummeted due to changes in fashion decorum.

Depredation activities have also greatly influenced the amount of trapping activity. Trapping was widely practiced around the turn of the 19<sup>th</sup> century due to generous bounties being paid on everything from coyotes to wolves. In addition to commercial trapping for furs and bounties, many ranchers and homesteaders also trapped, both to protect their livelihood and

## Furbearers

to help make ends meet. Nor was all of the trapping carried out in the private sector; both the federal Predatory and Rodent Control branch of the U. S. Biological Survey and the state Arizona Game and Fish Commission employed professional trappers after 1915, and the federal government continues to do so. One of the oddest situations occurred in the late 1940s and early 1950s when the price of pelts was low. Plagued by complaints of beaver damaging irrigation canals, the Arizona Game and Fish Department hired crews of beaver trappers to reduce the number of depredation complaints.

Generally speaking, fur prices and trapping activity were high during the 1890s, and again during and shortly after World War I. After declining in the early 1920s, prices again rose in the mid-1920s before again falling in the 1930s. Prices picked up again during

World War II, but collapsed shortly afterward before reaching another bottom in the 1950s. Prices gradually improved through the 1960s, and then accelerated in the early 1970s until the price of coyote and bobcat pelts peaked in the late 1970s and early 1980s. Since that time, competition from highly realistic faux fur and the declining use of fur in the highly volatile fashion industry have lowered fur prices even further. Another severe blow to the trapping industry was received in 1994 when a public initiative was passed in Arizona banning the use of leg-hold steel traps on public lands. Although trapping is still legal on private lands, all of these events served to depress the trapping industry until there are now fewer than 150 licensed trappers in the state of Arizona.

### *Summary of Predator and Furbearer Harvest*

| Year                                                                                                                                                                                                                                                                                                                                             | Hunters | Hunter Days | HARVEST |         |       |          |
|--------------------------------------------------------------------------------------------------------------------------------------------------------------------------------------------------------------------------------------------------------------------------------------------------------------------------------------------------|---------|-------------|---------|---------|-------|----------|
|                                                                                                                                                                                                                                                                                                                                                  |         |             | Bobcats | Coyotes | Foxes | Raccoons |
| 1981                                                                                                                                                                                                                                                                                                                                             | 13,004  | 96,598      | 1,212   | 24,877  | 3,231 | 0        |
| 1982                                                                                                                                                                                                                                                                                                                                             | 11,130  | 75,258      | 958     | 25,062  | 3,980 | 0        |
| 1983                                                                                                                                                                                                                                                                                                                                             | 11,342  | 71,954      | 817     | 19,780  | 1,361 | 0        |
| 1984                                                                                                                                                                                                                                                                                                                                             | 12,395  | 78,797      | 1,012   | 19,478  | 1,391 | 0        |
| 1985                                                                                                                                                                                                                                                                                                                                             | 13,835  | 85,793      | 655     | 26,933  | 1,555 | 0        |
| 1986                                                                                                                                                                                                                                                                                                                                             | 15,710  | 114,411     | 911     | 36,771  | 2,960 | 0        |
| 1987                                                                                                                                                                                                                                                                                                                                             | 11,442  | 82,558      | 1,011   | 24,527  | 1,896 | 0        |
| 1988                                                                                                                                                                                                                                                                                                                                             | 10,595  | 58,855      | 408     | 28,234  | 1,281 | 0        |
| 1989                                                                                                                                                                                                                                                                                                                                             | 10,558  | 99,284      | 676     | 27,876  | 1,664 | 0        |
| 1990                                                                                                                                                                                                                                                                                                                                             | 9,521   | 83,913      | 317     | 17,075  | 952   | 1,079    |
| 1991                                                                                                                                                                                                                                                                                                                                             | 10,128  | 76,131      | 1,274   | 23,275  | 1,140 | 805      |
| 1992                                                                                                                                                                                                                                                                                                                                             | 9,028   | 81,931      | 1,262   | 18,299  | 1,796 | 534      |
| 1993                                                                                                                                                                                                                                                                                                                                             | 13,083  | 86,968      | 907     | 30,455  | 3,156 | 1,101    |
| 1994                                                                                                                                                                                                                                                                                                                                             | 10,125  | 93,425q     | 880     | 22,378  | 1,395 | 240      |
| 1995                                                                                                                                                                                                                                                                                                                                             | 13,910  | 93,425      | 791     | 30,350  | 2,337 | 2,215    |
| 1996                                                                                                                                                                                                                                                                                                                                             | 13,997  | 119,052     | 547     | 37,929  | 3,516 | 2,977    |
| 1997                                                                                                                                                                                                                                                                                                                                             | 12,279  | 106,681     | 3,235   | 33,469  | 8,134 | 382      |
| 1998                                                                                                                                                                                                                                                                                                                                             | 11,134  | 68,727      | 630     | 19,231  | 2,306 | 948      |
| 1999                                                                                                                                                                                                                                                                                                                                             | 14,535  | 100,626     | 1,463   | 45,781  | 4,934 | 2,382    |
| 2000                                                                                                                                                                                                                                                                                                                                             | 15,385  | 101,679     | 1,539   | 42,526  | 7,028 | 932      |
| 2001                                                                                                                                                                                                                                                                                                                                             | 13,570  | 132,768     | 1,538   | 33,589  | 5,587 | 1,164    |
| 2002                                                                                                                                                                                                                                                                                                                                             | 10,489  | 68,404      | 1,484   | 22,054  | 2,239 | 123      |
| 2003                                                                                                                                                                                                                                                                                                                                             | 12,365  | 93,589      | 3,257   | 46,253  | 5,566 | 248      |
| 2004                                                                                                                                                                                                                                                                                                                                             | 13,346  | 104,243     | 4,076   | 35,354  | 4,272 | 114      |
| 2005                                                                                                                                                                                                                                                                                                                                             | 19,263  | 120,712     | 1,769   | 46,716  | 5,014 | 592      |
| The Small Game questionnaire was modified to collect unit specific data. Sample no longer weighted in analysis. The data is not comparable to historic data. In 2004 and 2005, the historic survey format and the new unit specific survey format were run simultaneously. Beginning in 2006, only the new unit specific survey format was used. |         |             |         |         |       |          |
| 2004                                                                                                                                                                                                                                                                                                                                             | 12,615  | 114,146     | 2,388   | 22,107  | 3,368 | 245      |
| 2005                                                                                                                                                                                                                                                                                                                                             | 12,695  | 220,426     | 2,775   | 35,960  | 4,429 | 118      |
| 2006                                                                                                                                                                                                                                                                                                                                             | 13,970  | 182,180     | 2,006   | 45,133  | 2,426 | 215      |
| 2007                                                                                                                                                                                                                                                                                                                                             | 18,969  | 279,935     | 2,332   | 54,701  | 2,962 | 3,781    |

## Predator and Furbearer Harvest Data

*Summary of Trapping Numbers and Harvest Data For Predators and Furbearers*<sup>1</sup>

| Trapping Year        | No. of Licensed Trappers | No. of Trappers | TRAPPING HARVEST |        |       |         |          |        |         |        |        |
|----------------------|--------------------------|-----------------|------------------|--------|-------|---------|----------|--------|---------|--------|--------|
|                      |                          |                 | Coyote           | Bobcat | Skunk | Muskrat | Ringtail | Badger | Raccoon | Beaver | Fox    |
| 1976-77              | 1,820                    | 1,732           | 17,963           | 7,272  | 3,187 | 793     | 642      | 1,609  | 5,230   | 65     | 14,334 |
| 1977-78              | 1,621                    | 1,070           | 13,732           | 4,695  | 554   | 301     | 356      | 595    | 520     | 57     | 12,648 |
| 1978-79              | 1,233                    | 1,281           | 17,882           | 6,754  | 1,052 | 76      | 1,098    | 1,316  | 891     | 8      | 17,585 |
| 1979-80              | 2,098                    | 1,888           | 16,605           | 6,648  | 4,119 | 593     | 2,055    | 1,065  | 894     | 268    | 21,780 |
| 1980-81              | 2,008                    | 1,834           | 14,858           | 9,537  | 4,119 | 2,949   | 3,222    | 1,124  | 823     | 83     | 28,059 |
| 1981-82              | 2,219                    | 1,964           | 25,379           | 8,036  | 4,115 | 14      | 4,027    | 1,384  | 1,127   | 117    | 29,124 |
| 1982-83              | 1,746                    | 1,609           | 17,436           | 5,928  | 4,164 | 42      | 2,964    | 1,105  | 690     | 21     | 20,856 |
| 1983-84              | 1,129                    | 1,006           | 11,763           | 4,827  | 3,275 | 0       | 2,371    | 874    | 518     | 0      | 15,857 |
| 1984-85              | 1,127                    | 1,038           | 13,188           | 5,399  | 2,478 | 235     | 3,096    | 705    | 951     | 52     | 20,776 |
| 1985-86              | 1,129                    | 1,022           | 11,263           | 4,942  | 3,082 | 111     | 2,649    | 697    | 735     | 40     | 18,065 |
| 1986-87              | 1,163                    | 1,029           | 14,198           | 6,421  | 2,400 | 18      | 3,851    | 780    | 876     | 87     | 21,000 |
| 1987-88              | 1,315                    | 1,165           | 13,335           | 6,609  | 2,537 | 23      | 4,475    | 748    | 834     | 127    | 22,009 |
| 1988-89              | 852                      | 695             | 6,397            | 3,174  | 1,255 | 25      | 1,968    | 281    | 241     | 80     | 14,516 |
| 1989-90              | 444                      | 348             | 3,140            | 1,253  | 590   | 0       | 1,091    | 89     | 190     | 202    | 5,210  |
| 1990-91              | 222                      | 161             | 1,135            | 322    | 154   | 0       | 174      | 33     | 67      | 28     | 1,807  |
| 1991-92              | 265                      | 189             | 2,214            | 878    | 336   | 0       | 403      | 151    | 84      | 52     | 2,864  |
| 1992-93              | 234                      | 202             | 2,372            | 723    | 300   | 0       | 258      | 69     | 49      | 9      | 3,445  |
| 1993-94              | 194                      | 181             | 2,683            | 1,362  | 271   | 12      | 372      | 44     | 74      | 0      | 5,312  |
| 1994-95              | 109                      | 85              | 654              | 181    | 170   | 0       | 157      | 24     | 24      | 0      | 1,647  |
| 1995-96              | 34                       | 24              | 178              | 55     | 46    | 0       | 12       | 8      | 0       | 0      | 144    |
| 1996-97              | 84                       | 57              | 1,307            | 251    | 89    | 41      | 30       | 11     | 57      | 19     | 648    |
| 1997-98              | 86                       | 46              | 1,437            | 286    | 61    | 3       | 15       | 21     | 49      | 52     | 685    |
| 1998-99              | 81                       | 57              | 1,213            | 312    | 114   | 0       | 8        | 27     | 114     | 16     | 798    |
| 1999-00              | 75                       | 58              | 1,096            | 144    | 144   | 0       | 29       | 17     | 37      | 0      | 470    |
| 2000-01              | 64                       | 32              | 182              | 109    | 83    | 0       | 19       | 10     | 35      | 3      | 240    |
| 2001-02              | 66                       | 29              | 305              | 97     | 25    | 0       | 3        | 7      | 7       | 9      | 143    |
| 2002-03              | 65                       | 13              | 274              | 37     | 35    | 0       | 8        | 2      | 8       | 10     | 54     |
| 2003-04              | 122                      | 58              | 635              | 267    | 97    | 0       | 31       | 25     | 23      | 3      | 312    |
| 2004-05              | 140                      | 82              | 710              | 432    | 72    | 0       | 12       | 70     | 21      | 9      | 423    |
| 2005-06              | 122                      | 76              | 820              | 742    | 119   | 0       | 17       | 33     | 25      | 13     | 484    |
| 2006-07              | 140                      | 83              | 670              | 957    | 188   | 1       | 35       | 26     | 19      | 10     | 751    |
| 2007-08              | 133                      | 94              | 806              | 944    | 123   | 0       | 49       | 41     | 169     | 22     | 1,008  |
| 2008-09 <sup>2</sup> | 192                      | 113             | 707              | 1,124  | 268   | 0       | 33       | 35     | 14      | 5      | 1,173  |

<sup>1</sup> Not including Indian Reservations.

<sup>2</sup> 2008-09 data is preliminary.



---

# Waterfowl

---

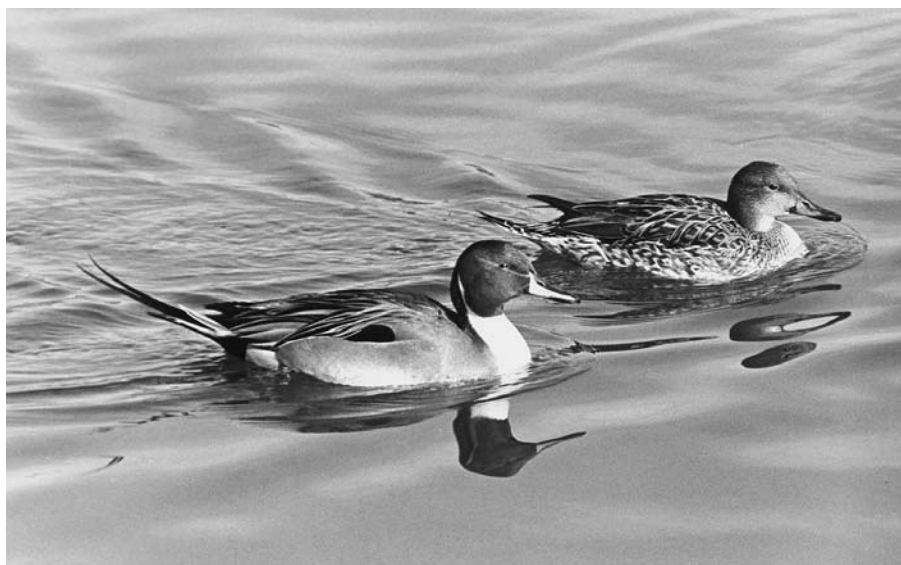

BOB MILES

## Drakes

### *Natural History*

Arizona's waterfowl can be grouped into two general classes—ducks, geese, and coots that nest in the state, and those that merely winter here or migrate through. The number of waterfowl raised in Arizona each summer, although few, is of great importance because these birds represent our state's breeding stock. The much more abundant migrants, though present only for limited periods of time between August and March, constitute most of Arizona's waterfowl harvest. Hunt regulations have been designed to accommodate both groups.

Arizona's principal waterfowl nesting grounds are the natural and modified marshes found above the Mogollon Rim and in the White Mountains. Most of these marshlands depend on winter precipitation and snow-melt rather than groundwater, are more or less seasonal, and are mostly located above 7,000 feet elevation. Examples include Mormon Lake and Marshall Lake on the Coconino Plateau, and Basin Lake and Nelson Reservoir in the White Mountains. Farm ponds and other small wetlands in the southeastern and southern parts of the state can also be expected to

produce a few broods of Mexican ducks and black-bellied whistling ducks each year.

The principal duck species nesting in Arizona are mallards (especially in the White Mountains), pintails, cinnamon teal, redheads, and ruddy ducks. In addition to these "big five," smaller numbers of gadwall, green-winged teal, blue-winged teal, and ring-necked ducks are produced in northern Arizona marshes. Even less common are the occasional pair of canvasbacks, shovelers, and American

widgeon. Most of the ducks that migrate through or winter in Arizona are from the Great Basin or "intermountain" states, with significant numbers of pintails and green-winged teal coming from the prairie states and provinces.

Arizona also hosts a few nesting Canada geese or honkers. These birds, which were introduced by the Arizona Game and Fish Department, are found primarily on shallow lakes east of the White Mountains between 6,000 and 7,500 feet elevation. Far more important to hunters are the more than 15,000 Canada geese that make their winter home in Arizona. The great majority of these birds are referred to as the Rocky Mountain Population of Canada goose, which nest in the intermountain states. A large goose, the males or ganders typically weigh about 9.75 pounds, the females about 8.25 pounds. The vast majority of these geese, along with several hundred snow geese, winter along the lower Colorado River on Cibola, Havasu, and Imperial National Wildlife Refuges, and in a few central Arizona locations such as Roosevelt Lake. A few white-fronted geese also pass through the state in September on their way to unknown wintering locales in Mexico.

The numbers of both nesting and wintering water-

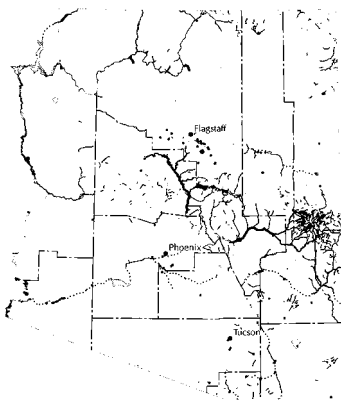

## Watershed

A serious problem facing both nesting and migrating waterfowl is that our wetlands are increasingly difficult to manage for ducks and geese because of the limited occurrence of these habitats and the competing uses resulting from Arizona's human population boom. Nesting waterfowl require protection from disturbance, and many former nesting sites are no longer productive due to the introduction of predatory game fish and summer-long recreational use. One bright note of late has been the creation of wetlands using treated sewage effluent. These "municipal marshlands" are primarily managed as waterfowl nesting and resting areas. Working in conjunction with the Arizona Game and Fish Department and U.S. Forest Service, cities such as Pinetop-Lakeside, Show Low, and Sedona have developed a number of these nutrient-rich and highly productive wetlands that are heavily used by waterfowl, as well as a variety of other wetland dependent species.

## Hunt History

When Anglo-Americans first arrived in Arizona, they found migrating and wintering waterfowl concentrated along the state's few major rivers. The lower Colorado and Gila rivers were especially noted as havens for waterfowl, with great clouds of the birds seen along the muddy banks by explorers, fur trappers, and steamboat passengers. Nor were nesting waterfowl in short supply; travelers across northern Arizona reported that they flushed a myriad of ducks in the shallow marshes on the San Francisco Plateau.

Unlike other states, early Arizona never experienced market hunting for waterfowl as a major enterprise. Prior to statehood, most duck shooting, when not for sport, was for personal subsistence. Settlers not only hunted waterfowl during spring, fall, and winter, they also gathered the ducks' eggs in spring. Gradually, with the development of the state's economies, this subsistence hunting gave way to sport-hunting, and irrigation ponds, canals and stock tanks became increasingly important waterfowl hunting locales. By the time that

fowl in Arizona vary sporadically from year to year depending on the vagaries of winter precipitation in the Great Basin region. Wet years generally see an increase in waterfowl production, while drought years result in fewer ducks being produced.

A serious prob-

lem facing both nesting and migrating waterfowl is that our wetlands are increasingly difficult to manage for ducks and geese because of the limited occurrence of these habitats and the competing uses resulting from Arizona's human population boom. Nesting waterfowl require protection from disturbance, and many former nesting sites are no longer productive due to the introduction of predatory game fish and summer-long recreational use. One bright note of late has been the creation of wetlands using treated sewage effluent. These "municipal marshlands" are primarily managed as waterfowl nesting and resting areas. Working in conjunction with the Arizona Game and Fish Department and U.S. Forest Service, cities such as Pinetop-Lakeside, Show Low, and Sedona have developed a number of these nutrient-rich and highly productive wetlands that are heavily used by waterfowl, as well as a variety of other wetland dependent species.

le being migratory birds, ducks and geese came under the protection of the federal government with the passage of the 1918 Migratory Bird Treaty Act. Arizona, unlike a number of other states, did not challenge the federal jurisdiction over migratory birds, and, prior to the Treaty's enactment, had even passed a number of protective measures for waterfowl. These included closing the hunting season during the spring months and prohibiting the gathering of eggs from nesting birds. All through the 1920s, and even into the drought years of the 1930s, waterfowl hunting was as popular a sport in Arizona as quail or dove hunting, if for no other reason than one got so much more game meat for the number of shells expended.

The drought years of the 1930s were hard on America's waterfowl populations, and it soon became apparent that nesting and other wetland habitats would have to be purchased and preserved if the public was to continue hunting ducks and geese. In 1934, a federal law was passed requiring persons 16 years of age and older to purchase a "duck stamp" if they wanted to hunt waterfowl. Soon after, a program was initiated to create a series of national wildlife refuges, many of which were primarily for waterfowl. From the 1940s through the 1950s Arizona saw the creation of two national waterfowl refuges on the Colorado River—Imperial and Havasu—as well as the acquisition of state wildlife areas such as Mittry Lake on the Colorado River, and Arlington and Robbins Butte on the middle Gila River. A number of waterfowl studies also started at this time, and banding investigations showed the value of managing waterfowl by flyways, a concept that was formalized in the hunt regulations in 1948. As a result, Arizona is included in the Pacific Flyway, which includes the Great Basin states as well as those on the Pacific Coast.

Major hunting restrictions incurred during the past 50 years have included limiting the take of such species as canvasbacks and redheads, closing certain portions of refuges and management areas to provide undisturbed resting and feeding places, and imposing the use of nontoxic steel shot rather than lead shot for the taking of waterfowl. Recently, favorable habitat conditions and resulting waterfowl production throughout the United States and Canadian breeding grounds has led to liberal season lengths and bag limits; although, long term declines of pintail and scaup have resulted in those species having bag limit restrictions.

The federal government, in conjunction with participating states, coordinates three major waterfowl surveys each year. The first of these, which does not include Arizona, is the "Breeding Ground Survey," which attempts to measure the coming year's productivity by

estimating the number of nesting ducks present on the continent's major nesting grounds in Alaska, Canada, and in the prairie states. The results of this survey are strongly linked to fall forecast flights of ducks and corresponding harvest frameworks. The "Winter Area Survey," which does include Arizona, is also conducted each year, and tallies the number of waterfowl using major wintering areas in the southern United States and Mexico. The number of birds counted on these surveys in Arizona has generally declined from the 1960s, when up to 42,000 ducks were observed in a given year, until the 1980s and '90s when counts often tallied less than 10,000. Conversely, the total number of Canada geese observed has increased from around 7,500 birds in 1960 to an average of 20,000 geese throughout the 1980s and '90s. The 1999 and 2000 survey revealed an increase in total ducks observed at about 35,000 with geese decreasing down to around 15,000 birds. The increase in ducks corresponds with the recent increase in the breeding ground surveys and the fall flight forecast.

The third survey is the annual hunt questionnaires sent to duck stamp purchasers requesting information on the number of ducks and geese bagged. Since 1979, to better evaluate the data obtained from this survey, Arizona has tried to maintain a standardized waterfowl season of approximately 100 days with a seven-bird bag limit (certain species excepted). As a result, Arizona's waterfowl regulations do not greatly vary from year-to-year, and bag-limit regulations do not provide for bonus

(or penalty) points for taking certain species of waterfowl. The sample size of the state's hunt questionnaire survey greatly improved in 1988 when waterfowl hunters were required to purchase an Arizona waterfowl stamp in addition to a federal stamp.

The number of waterfowl hunters has fluctuated over the years, as much in response to duck stamp price increases as to any change in waterfowl numbers. Hunter numbers have been in a general downward trend since the mid-1980s, when more than 12,500 hunters took to the field, to the late 1990s when only about half that number participated. Recent estimates indicate that hunter numbers are again headed upward, and the long-term average of between 10,000 and 12,000 duck hunters a year may again be realized. Waterfowl hunting is nonetheless a resource-regulated sport, and Arizona's limited wetland areas will never accommodate high densities of hunters.

Annual waterfowl harvest figures are also sporadic. Estimates range from more than 150,000 ducks being harvested during the fall and winter of 1979-80, to less than 18,000 ducks being taken in 1990-91. The average annual take during the past three years has nonetheless been more than 50,000 birds. Goose harvests tend to be more predictable, with hunters usually claiming between 2,000 and 4,000 Canada geese and a few snows each year. Last year, however, survey estimates showed hunters taking 6,275 geese, the highest number since 1986-87.

# Waterfowl Survey and Harvest Data

## *Summary of January Waterfowl Survey<sup>1</sup>*

| Year | Ducks               | Mergansers | Coots  | Canada Geese | Snow Geese |
|------|---------------------|------------|--------|--------------|------------|
| 1950 | 27,455              | No survey  | 19,255 | 7,375        | 1,200      |
| 1951 | 10,965              | 1,350      | 4,780  | 5,155        | 1,150      |
| 1952 | 33,320              | 1,545      | 12,155 | 4,210        | 1,395      |
| 1953 | 25,050              | 1,335      | 22,060 | 3,050        | 1,400      |
| 1954 | 19,665              | 1,810      | 41,725 | 3,515        | 1,970      |
| 1955 | 27,115              | 965        | 8,570  | 2,860        | 900        |
| 1956 | 24,950              | 995        | 25,480 | 2,860        | 330        |
| 1957 | 44,455              | 610        | 31,840 | 3,640        | 215        |
| 1958 | 20,565              | 1,985      | 20,385 | 3,770        | 255        |
| 1959 | 34,700              | 1,795      | 24,055 | 5,865        | 335        |
| 1960 | 42,220              | 2,775      | 17,615 | 6,046        | 471        |
| 1961 | 27,100              | 4,395      | 19,055 | 5,526        | 583        |
| 1962 | 24,465              | 4,185      | 19,065 | 5,940        | 520        |
| 1963 | 22,260              | 4,145      | 40,625 | 6,650        | 805        |
| 1964 | 21,370              | 4,967      | 27,752 | 7,142        | 551        |
| 1965 | 21,304              | 3,298      | 15,900 | 4,431        | 229        |
| 1966 | 32,342              | 12,963     | 53,962 | 5,744        | 213        |
| 1967 | 19,425              | 3,980      | 12,278 | 3,602        | 192        |
| 1968 | 40,091              | 4,127      | 27,706 | 4,370        | 259        |
| 1969 | 11,020              | 4,854      | 9,839  | 3,052        | 500        |
| 1970 | 17,880              | 7,301      | 16,674 | 3,135        | 262        |
| 1971 | 19,212              | 3,552      | 15,649 | 3,502        | 221        |
| 1972 | 23,123              | 2,584      | 17,194 | 4,241        | 706        |
| 1973 | 19,684              | 4,682      | 12,935 | 4,745        | 503        |
| 1974 | 19,785              | 2,661      | 24,305 | 5,357        | 502        |
| 1975 | 9,828               | 1,775      | 17,831 | 2,534        | 228        |
| 1976 | 2,280               | 1,000      | 2,800  | 3,545        | 0          |
| 1977 | 4,680               | 700        | 1,900  | 3,511        | 4          |
| 1978 | 3,451               | 32         | 1,850  | 4,339        | 0          |
| 1979 | 18,326              | 220        | 3,160  | 4,962        | 7          |
| 1980 | 29,240              | 2,110      | 4,265  | 13,992       | 6          |
| 1981 | 10,550              | 281        | 3,033  | 9,170        | 2,500      |
| 1982 | 4,043               | 71         | 1,781  | 10,835       | 34         |
| 1983 | 5,176               | 202        | 1,026  | 13,373       | 2,527      |
| 1984 | 9,450               | 581        | 816    | 16,831       | 865        |
| 1985 | 7,306               | 830        | 162    | 17,619       | 1,443      |
| 1986 | 12,189              | 3,204      | 510    | 23,042       | 2,621      |
| 1987 | 9,623               | 2,321      | 1,337  | 14,131       | 1,103      |
| 1988 | 3,330               | 1,108      | 797    | 23,930       | 2,229      |
| 1989 | 6,317               | 298        | 1,409  | 22,594       | 1,303      |
| 1990 | 4,617               | 1,061      | 1,117  | 26,974       | 2,830      |
| 1991 | 7,114               | 1,894      | 1,135  | 31,897       | 4,434      |
| 1992 | 4,724               | 1,108      | 808    | 18,733       | 1,207      |
| 1993 | 7,961               | 826        | 143    | 22,596       | 1,265      |
| 1994 | 7,605               | 364        | 603    | 22,607       | 1,653      |
| 1995 | 11,933              | 881        | 1,051  | 21,078       | 2,941      |
| 1996 | 10,019              | 330        | 1,209  | 15,326       | 1,927      |
| 1997 | 9,776               | 220        | 2,356  | 18,598       | 1,325      |
| 1998 | 35,081 <sup>2</sup> | 1,749      | 757    | 14,164       | 2,965      |

<sup>1</sup> In 2001, this summary was revised to include Waterfowl from Cibola, Havasu and Imperial National Wildlife Refuges. Refuge data was collected by Refuge personnel.

<sup>2</sup> Resulting from excellent habitat condition.

<sup>3</sup> In 1999, the biologists conducting the survey changed; therefore, the observation rate may have changed.

<sup>4</sup> Resulting from poor habitat conditions (drought).

<sup>5</sup> Good late winter precipitation. Several lakes that had been nearly dry for years (specifically, San Carlos Reservoir) had water.

# Waterfowl Survey and Harvest Data

## Summary of January Waterfowl Survey<sup>1</sup> (continued)

| Year              | Ducks               | Mergansers | Coots       | Canada Geese | Snow Geese |
|-------------------|---------------------|------------|-------------|--------------|------------|
| 1999 <sup>3</sup> | 29,979              | 995        | 12,036      | 21,040       | 2,352      |
| 2000              | 29,376              | 450        | 12,924      | 9,169        | 446        |
| 2001              | 36,191              | 713        | 17,802      | 14,670       | 976        |
| 2002              | 20,498 <sup>4</sup> | 53         | 22,053      | 11,250       | 983        |
| 2003              | 22,489              | 220        | 9,517       | 13,351       | 261        |
| 2004              | 25,895              | 219        | not counted | 7,777        | 349        |
| 2005 <sup>5</sup> | 48,186              | 443        | 43,185      | 14,921       | 1,250      |
| 2006              | 16,974              | 633        | 12,727      | 13,849       | 911        |
| 2007              | 16,626              | 329        | 16,680      | 17,578       | 603        |
| 2008              | 18,360              | 292        | 30,973      | 7,695        | 750        |
| 2009              | 13,865              | 339        | 9,338       | 10,619       | 726        |

<sup>1</sup> In 2001, this summary was revised to include Waterfowl from Cibola, Havasu and Imperial National Wildlife Refuges. Refuge data was collected by Refuge personnel.

<sup>2</sup> Resulting from excellent habitat condition.

<sup>3</sup> In 1999, the biologists conducting the survey changed; therefore, the observation rate may have changed.

<sup>4</sup> Resulting from poor habitat conditions (drought).

<sup>5</sup> Good late winter precipitation. Several lakes that had been nearly dry for years (specifically, San Carlos Reservoir) had water.

## Summary of Arizona Waterfowl Harvest

| Year                 | Stamps Issued | Hunters | Hunter Days | HARVEST |       |
|----------------------|---------------|---------|-------------|---------|-------|
|                      |               |         |             | Ducks   | Geese |
| 1981-82              |               | 10,904  | 57,184      | 81,091  | 5,169 |
| 1982-83              |               | 10,995  | 46,356      | 61,733  | 3,714 |
| 1983-84              |               | 8,438   | 39,470      | 46,820  | 3,357 |
| 1984-85              |               | 11,636  | 63,366      | 109,279 | 4,300 |
| 1985-86              |               | 12,508  | 64,508      | 79,653  | 4,994 |
| 1986-87              |               | 12,750  | 76,502      | 114,753 | 6,261 |
| 1987-88 <sup>1</sup> | 8,299         | 7,139   | 53,425      | 87,400  | 5,243 |
| 1988-89              | 7,104         | 5,101   | 33,683      | 34,662  | 4,054 |
| 1989-90              | 6,750         | 3,455   | 20,606      | 23,576  | 2,273 |
| 1990-91              | 6,292         | 2,513   | 16,324      | 17,683  | 2,219 |
| 1991-92              | 5,264         | 3,062   | 19,885      | 19,703  | 1,936 |
| 1992-93              | 5,383         | 3,389   | 22,464      | 23,241  | 3,631 |
| 1993-94              | 5,371         | 3,701   | 23,286      | 22,907  | 2,723 |
| 1994-95              | 5,107         | 4,138   | 30,041      | 35,971  | 3,009 |
| 1995-96              | 6,598         | 5,228   | 34,187      | 41,390  | 3,184 |
| 1996-97              | 6,908         | 5,513   | 35,784      | 41,603  | 3,247 |
| 1997-98              | 6,957         | 5,387   | 36,433      | 47,363  | 2,796 |
| 1998-99              | 7,951         | 5,964   | 42,853      | 61,685  | 2,911 |
| 1999-00              | 8,521         | 6,455   | 39,861      | 51,028  | 6,275 |
| 2000-01              | 9,019         | 5,677   | 44,431      | 48,788  | 4,504 |
| 2001-02              | 7,733         | 3,821   | 28,534      | 33,950  | 4,183 |
| 2002-03              | 6,775         | 4,885   | 35,146      | 35,128  | 2,859 |
| 2003-04              | 6,733         | 4,804   | 32,810      | 37,211  | 2,969 |
| 2004-05              | 6,334         | 4,459   | 31,373      | 35,421  | 3,051 |
| 2005-06              | 6,519         | 4,658   | 30,736      | 42,450  | 2,625 |
| 2006-07              | 6,776         | 4,001   | 28,107      | 42,771  | 1,996 |
| 2007-08              | 7,071         | 4,630   | 33,020      | 49,782  | 2,431 |
| 2008-09              | 5,580         | 3,775   | 30,305      | 37,494  | 1,666 |

<sup>1</sup> State waterfowl stamp implemented.

---

## Sandhill Crane (*Grus canadensis*)

---

### *Natural History*

Portions of three distinct populations of sandhill cranes winter in Arizona. Cranes from both the Rocky Mountain (RM) and Mid-Continent (M-C) populations winter in the Sulphur Springs and Gila River valleys in southeastern Arizona. Other sandhills from the

Lower Colorado River Valley (LCRV) population winter along the lower Colorado River, primarily on the Colorado River Indian Reservation, Cibola National Wildlife Refuge, and below Gillespie Dam on the Gila River. RM cranes nest primarily in Idaho, Montana, Wyoming, and Utah, while cranes from the LCRV population mostly nest in northeastern Nevada. The

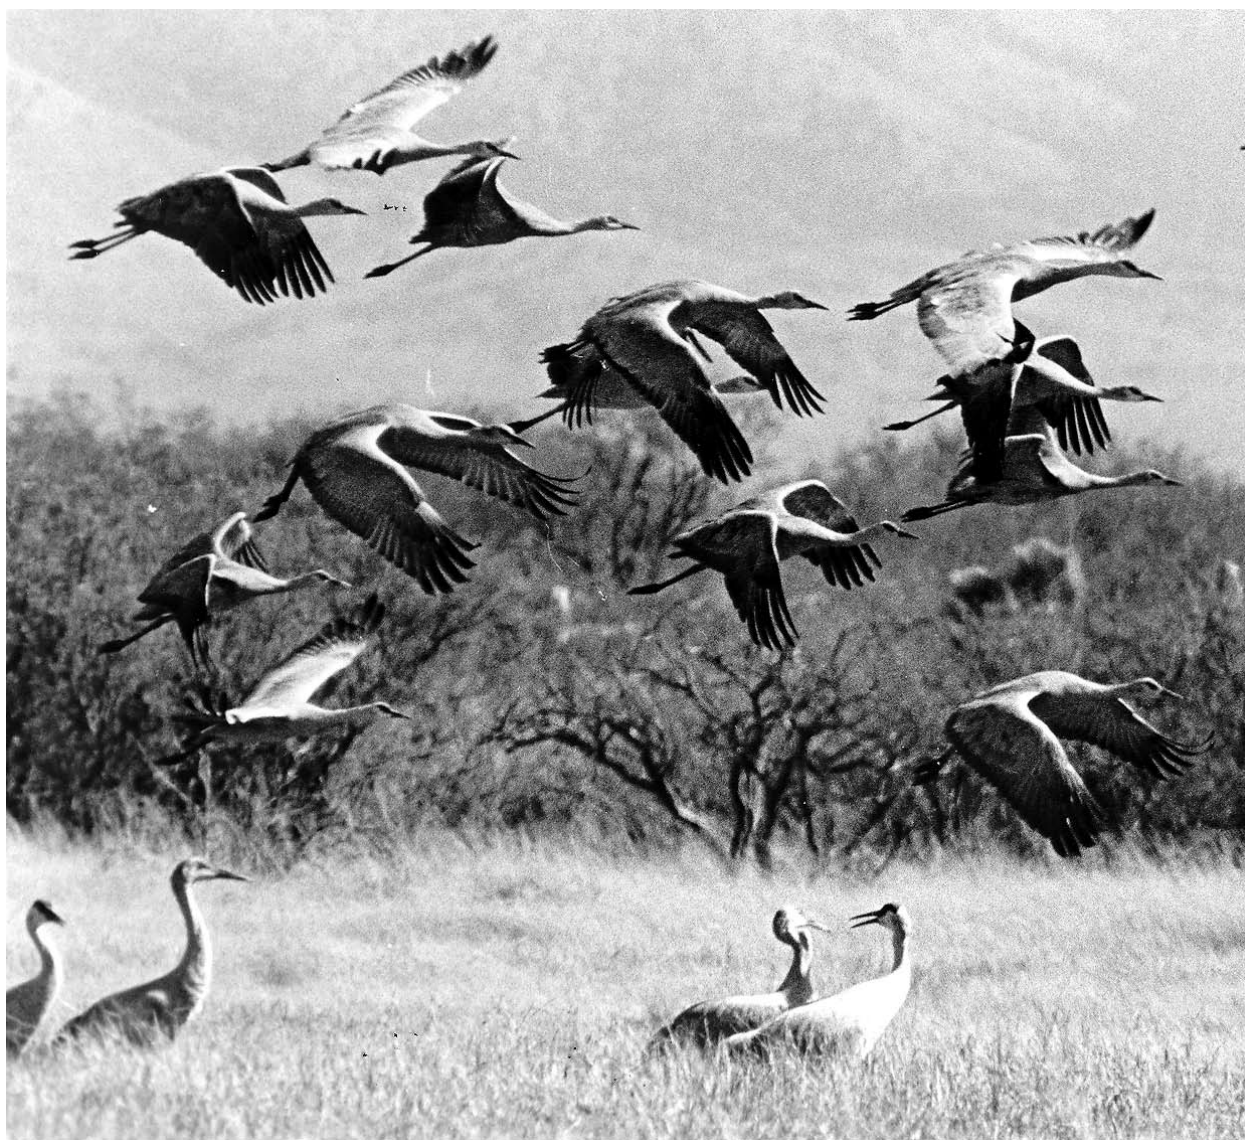

BOB MILES

# Sandhill Crane

nesting range of the M-C population includes much of Canada and Alaska. Birds from this latter population pass through the central plains before staging on the Platte River where they continue on to their wintering grounds in Texas, Oklahoma, New Mexico, Arizona, and Mexico.

Wintering areas selected by sandhill cranes feature shallow-water roosting sites with low or sparse vegetation including playa lakes and sandbars along shallow, braided river channels. Another requirement is the close proximity of harvested fields of grain, such as corn and milo. High-energy grains are needed to maintain the birds in sufficient condition to make their return migration in mid-to-late February.

Cranes leave their roosting areas in early morning, usually about sunrise, to fly to feeding areas where they typically spend from three to four hours eating. During midday the cranes return to the roost, or go to a nearby loafing area, which is commonly a grassland or wetland. In the late afternoon, cranes sometimes revisit their feeding area before returning to their nighttime roosts.

Sandhill cranes in the western United States nest in high elevation shallow marshes and wet meadows. Adult pairs do not nest until they are at least four or five years old, and typically have very poor success the first year or two. Cranes commonly lay two eggs, but only about one-third of the successful nesters are able to raise two young or "colts." In dry years, when wetlands shrink, predators, especially coyotes, take a heavy toll on the flightless young. During recent dry years the proportion of young-of-the-year birds in the fall population has been around four percent. Even in good production years, young-of-the-year birds rarely comprise more than 12 percent of the fall population.

Depending on habitat conditions, sandhills begin congregating in local agricultural areas, called pre-mi-

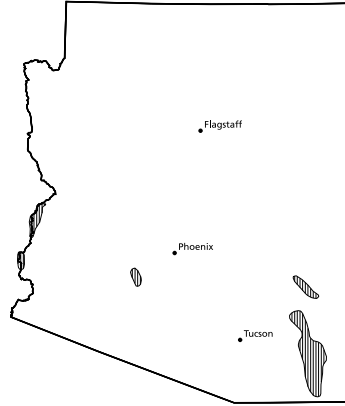

**Sandhill crane distribution**

gration staging sites, in late August. Migration to wintering areas begins in September, the birds typically migrating in a few, high-altitude flights to traditional stopover areas. For cranes of the three populations that winter in Arizona, the major stopovers are the Platte River in Nebraska for the M-C, San Luis Valley in Colorado for the RM, and wetlands near Lund, Nevada, for the LCRV. Cranes begin arriving on their wintering areas between late September and mid-October.

## *Hunt History*

A generally uncommon species in Arizona, sandhill cranes were protected by the Migratory Bird Treaty Act of 1918. In the early 1970s, however, counts of around 1,000 cranes wintering in Sulphur Springs Valley prompted concern that these birds might eventually cause crop damage. By 1980 more than 4,000 cranes were being tallied, and a limited hunt of 100 permits was authorized in 1981. This hunt was gradually expanded as crane numbers continued to increase and fears that the birds would winter elsewhere subsided. As of 1998, more than 300 permits were being authorized and census figures showed a wintering population of nearly 25,000 sandhill cranes in Sulphur Springs Valley.

# Sandhill Crane Harvest Data

## *Summary of Sandhill Crane Harvest*

| Year              | Mid-Winter Survey <sup>1</sup> | Permits Authorized | Total Applicants | Permits Issued <sup>2</sup> | Hunters Afield | Hunter Days | Percent Harvest | Hunter Success | Draw Odds <sup>3</sup> |
|-------------------|--------------------------------|--------------------|------------------|-----------------------------|----------------|-------------|-----------------|----------------|------------------------|
| 1981              | 4,350                          | 100                | 234              | 100                         | 55             | 119         | 42              | 49             | 42.7                   |
| 1982              | 5,640                          | 100                | 279              | 100                         | 55             | 95          | 73              | 78             | 35.8                   |
| 1983              | 8,550                          | 100                | 356              | 100                         | 77             | 152         | 55              | 55             | 28.1                   |
| 1984              | 8,350                          | 100                | 239              | 104                         | 72             | 110         | 69              | 74             | 41.8                   |
| 1985              | 11,500                         | 150                | 436              | 150                         | 121            | 234         | 92              | 46             | 34.4                   |
| 1986              | 11,450                         | 150                | 239              | 150                         | 124            | 217         | 138             | 69             | 62.8                   |
| 1987              | 11,070                         | 300                | 378              | 300                         | 212            | 406         | 193             | 57             | 79.7                   |
| 1988              | 6,670                          | 300                | 505              | 300                         | 228            | 446         | 207             | 58             | 59.4                   |
| 1989              | 11,730                         | 300                | 451              | 300                         | 219            | 473         | 158             | 47             | 66.5                   |
| 1990              | 11,990                         | 165                | 512              | 165                         | 139            | 275         | 123             | 53             | 32.3                   |
| 1991              | 10,000                         | 300                | 326              | 296                         | 255            | 517         | 216             | 54             | 92.0                   |
| 1992              | 2,4704                         | 300                | 342              | 300                         | 258            | 532         | 176             | 48             | 87.7                   |
| 1993              | 12,740                         | 300                | 381              | 300                         | 217            | 401         | 174             | 50             | 78.7                   |
| 1994              | 9,210                          | 300                | 390              | 300                         | 227            | 464         | 113             | 32             | 76.9                   |
| 1995              | 24,190                         | 270                | 390              | 270                         | 211            | 423         | 157             | 48             | 69.2                   |
| 1996              | 12,500                         | 315                | 443              | 315                         | 256            | 521         | 141             | 38             | 71.1                   |
| 1997              | 21,050                         | 315                | 389              | 315                         | 235            | 430         | 193             | 47             | 81.0                   |
| 1998 <sup>5</sup> | 24,616                         | 310                | 440              | 321                         | 232            | 450         | 151             | 40             | 72.9                   |
| 1999              | 21,650                         | 310                | 456              | 309                         | 242            | 518         | 113             | 33             | 68.0                   |
| 2000              | 21,131                         | 310                | 383              | 305                         | 218            | 389         | 203             | 57             | 80.9                   |
| 2001              | 22,928                         | 310                | 356              | 310                         | 235            | 468         | 180             | 52             | 87.1                   |
| 2002              | 21,327                         | 310                | 349              | 310                         | 253            | 489         | 239             | 58             | 88.8                   |
| 2003              | 31,443                         | 310                | 397              | 306                         | 248            | 497         | 189             | 48             | 77.1                   |
| 2004              | 29,208                         | 325                | 367              | 311                         | 263            | 319         | 192             | 59             | 84.7                   |
| 2005              | 30,570                         | 365                | 333              | 333                         | 261            | 548         | 277             | 66             | 95.8                   |
| 2006              | 28,156                         | 365                | 353              | 353                         | 222            | 559         | 180             | 55             | 97.4                   |
| 2007              | 36,823                         | 365                | 295              | 309                         | 254            | 442         | 311             | 72             | 99.3                   |
| 2008              | 29,103                         | 375                | 368              | 318                         | 261            | 485         | 162             | 48             | 84.5                   |

<sup>1</sup> The Mid-Winter Survey occurs in December and January. The survey conducted in December 2008 and January 2009 is labeled 2008. The data listed is only for the Willcox Playa and surrounding areas.

<sup>2</sup> Permits Issued includes any tags via the draw and first-come, first-serve.

<sup>3</sup> Draw Odds is the number of permits issued through the draw divided by total applicants in the draw.

<sup>4</sup> Poor survey conditions.

<sup>5</sup> As of 1998, Sandhill crane check stations will be conducted every 3rd year (2008, 2011, 2014, etc.). Data will be based on the hunter questionnaire results unless a check station is conducted; then, harvest numbers will be taken from the check station results. Reminder questionnaires were sent if necessary.



---

# Other Birds and Mammals

---

*The Migratory Bird Treaty Act protects all birds except rock doves, European starlings, house sparrows, and all other non-native species. However, the federal government permits the states to open a season on certain birds and waterfowl. Mammals that are not classified as big or small game, predators, or furbearers are considered nongame and are managed by the Arizona Game and Fish Commission as "other mammals." Many of these mammals can be hunted by licensed individuals throughout the calendar year, with notable exceptions presented below. While there are no bag limits on most of these species, most nongame mammals are not hunted. As a result, harvest data for these species are not available.*

## BIRDS

---

### Pigeon (Rock Dove)

Pigeons are closely associated with human developments including towns, parks, and agricultural landscapes. In their native settings, they nest along the seashore on airy cliffs and in rocky crevices or caves. In urban areas, they commonly nest on high-rise buildings, billboards, bridges and other structures. They average 12.5 inches in length. The coloration is highly variable, the most common being a dark gray head and neck with green and purplish iridescence on the neck, a back of lighter gray, and a whitish rump. The tail has a black band and the wings two black bars. The call is a soft coo familiar to most homeowners.

#### *Natural History and Status*

Pigeons nest year round in Arizona, building messy nests of sticks and roots. Nests are often placed under an overhang of some sort such as under eaves or bridges. The eggs are white. The species can raise four or five broods of one or two young in a single year. As with other pigeons, both sexes feed the young regurgitated "crop milk" exclusively for the first few days. After approximately five days, the young begin eating seeds and are soon eating the adult diet of grains and sometimes

greens and insects. During the nonbreeding season, pigeons form large roosting and feeding flocks. Pigeons were introduced from Eurasia in the late 1800s and have become established throughout the United States.

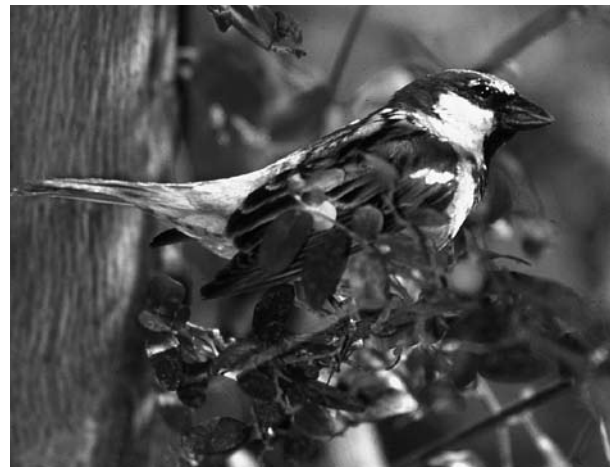

GEORGE ANDREIKO

House (English) Sparrow

### House (English) Sparrow

House sparrows are common residents of cities and farms statewide. These brownish, conical-billed sparrows are approximately 5 inches in length. The males sport black bibs and beaks, white cheeks, blue-gray caps, chestnut napes, and black-streaked backs. Females are slightly smaller and less distinctive, with grayish, pale underparts, light-buff eye streaks, and striped backs. The house sparrow's lively calls and songs consist of chirps and cheeps that are familiar to almost every homeowner.

#### *Natural History and Status*

House sparrows nest from February through early summer, often having three broods per year. The nests, which may contain four to seven white to bluish colored eggs with gray or brown markings, are messy, woven affairs that may be located in eaves, palm fronds, bird houses, or most any other suitable site. House sparrows

will nest in cavities and aggressively compete with native species for nest sites. When they are not nesting, house sparrows commonly form flocks of up to a dozen or more birds. Highly adaptable, they feed on a wide variety of seeds, fruits, and insects. This resourceful bird greedily accepts almost any human handout and are commonly encountered foraging for morsels at fast-food restaurants.

House sparrows were introduced to Arizona from Europe via railroad cars from the East, and have been breeding residents since at least the early 1900s. They arrived in Tucson in 1903-04, had reached Winslow, Holbrook, and other railroad towns by 1909, and were widespread throughout the state by 1915. Despite its lack of protection, the species remains widely distributed, wherever humans and agricultural fields are found.

## European Starling (Starling)

European Starlings are found in a wide variety of habitats, but are most numerous in or near human settlements that provide open, grassy areas for foraging and trees or structures for nesting. This dark, 8-inch, meadowlark-sized bird is a common resident of city parks, residential areas and agricultural lands below 7,500 feet elevation. Although usually found in urban, suburban and agricultural settings, starlings are also found in the desert, usually near small towns or dwellings. Starlings can be differentiated from other black birds by their short tails, robust build, narrow and light-colored bills, and short, pointed, brown wings. Both sexes are iridescent black in summer, and heavily speckled in winter. Starlings eat a varied diet including insects, fruits and seeds. When feeding, they walk, rather than hop, from site to site. Their principal call is a guttural squeak, although they also mimic other birdcalls.

### *Natural History and Status*

European starlings reside in Arizona year-round and can initiate breeding activities as early as mid-January in warm areas of the state. Most breeding activity occurs from April to July, but nesting has been reported into early fall. Starlings take up residence in cavities such as

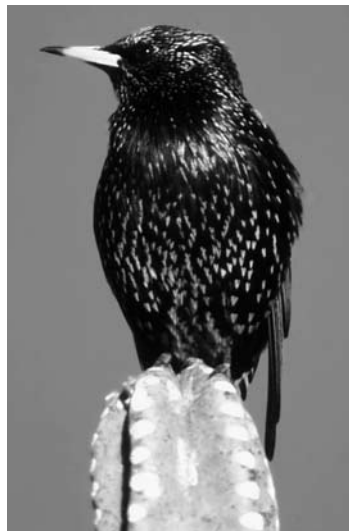

European starling

GEORGE ANDREIKO

woodpecker holes in saguaros or trees. Like the house sparrow, starlings are considered a pest species because they compete for nest sites with native species such as purple martins, woodpeckers and bluebirds. European Starlings will even evict nesting birds and destroy their eggs. Starlings typically lay four to six blue eggs and can raise two or three broods each year. When the species is not nesting, they form large communal roosts, which may contain hundreds of birds. A more recent arrival than the house sparrow, European starlings were first recorded in Arizona in 1946 near Lupton, with the first nest reported near Glendale in 1954. The species is now both a breeding resident and a migrant in the vicinities of Phoenix, Tucson, Kingman, Yuma, and other Arizona cities and towns.

## Peach-faced Lovebird

In Africa peach-faced lovebirds prefer dry, open country including wooded savannas, palm groves, and arid mountain slopes. In Arizona they are primarily found among the ornamental plantings in desert urban and residential settings. Although locally established in and around the greater Phoenix metropolitan area, they do not venture into the surrounding desert lands. They are small, bright green, parrot-like birds with a pinkish face and light-colored bill. Regular visitors to many backyard water and feeding stations, they have also been observed feeding on cactus fruit, apples, palm fruit, and seed pods.

### *Natural History and Status*

Like many other parrots, peach-faced lovebirds are cavity nesters and will take up residence in woodpecker holes in saguaros, under tile roof openings, and in untrimmed palm fronds. Lovebirds nest in groups and thus far there has been no evidence that they compete with native birds for nest sites. In Arizona, most nesting occurs from April through May. They will lay from three to eight eggs per clutch, possibly rearing two broods per year. The first free-ranging flock of peach-faced lovebirds in the Phoenix area was reported in 1987 near the border of Mesa and Apache Junction, and by the mid-1990s local flocks and colonies of lovebirds were discovered throughout the eastern half of the greater Phoenix metropolitan area.

## American Crow (Crow)

In Arizona, American crows are far outnumbered by their larger and more heat-tolerant relative: the common raven. Crows occur as local breeding residents in the more open areas of the Mogollon Rim, along the South Rim of the Grand Canyon, in the higher portions of the Navajo Indian Reservation, and along the

San Francisco River. This shiny, all black 1.5-foot-long bird can be differentiated from the larger raven by its smaller beak and tail, smoother plumage, and distinctive “caw” call. Also unlike ravens, crows rarely soar, but instead flap their wings when flying directly from point to point. Because of crop depredations, an open season on this species is authorized from September 1 through December 31.

### *Natural History and Status*

American crows are native to North America and reach their highest densities in the northeastern United States. They form large communal roosts during much of the year, sometimes in groups large enough to be problematic in towns or industrial areas. During the breeding season, however, the species is most often observed in smaller family units. They typically place their nests in well-hidden areas of their nest trees, generally close to the trunk. Nests are made of dead sticks, bark, corn stalks, twine, and cow dung, and lined with soft materials. Crows lay from three to nine bluish-green eggs marked with brown speckles. They feed on a variety of foods including insects, carrion, small mam-

mals and birds, bird eggs and grains, including some agricultural crops. Numbers have probably increased significantly since European settlement because of agricultural developments and timber clearing. Human developments have also enabled breeding range expansions into portions of the West and Midwest.

## MAMMALS

---

### Coati

This relative of the raccoon is usually seen individually or in small bands called “troops.” The lone males or “solos” may weigh up to 12 pounds, and greatly exceed the smaller 5.5- to 7-pound females in size. From 2.5 to just over 4 feet in length, coatis are approximately the size of a small dog. They range in color from ochre to cinnamon brown to nearly chocolate. Their most distinctive characteristics, however, are their clown-marked faces and faintly banded, tapered tails that commonly exceed 2 feet in length, giving coatis the superficial appearance of monkeys.

### *Natural History and Status*

Also known as chulos, coatis are semi-arboreal animals rarely found far from trees. Like tree squirrels, coatis have jointed hind feet, allowing the animals to descend the trunks of trees headfirst. These largely diurnal mammals are found primarily in mountains and canyons in the southeastern quarter of the state. Their principal habitats are Madrean oak-pine woodland and riparian deciduous forest. Highly omnivorous, their principal foods are lizards, insect larvae, bird eggs, acorns, fruits, and other mast.

Troops of coatis, which may range in size from one or two to up to 40 animals, are typically composed of females, sub-adults, and weaned young of the year. Males leave the troop when about 2 years old, after which they associate with the females only during the spring breeding season. Nursing females leave the troop for four to six weeks after giving birth. From one to six young are born in June or July. Born helpless in a den or hollow tree, the youngsters remain with their mother until old enough to forage with the troop in the fall.

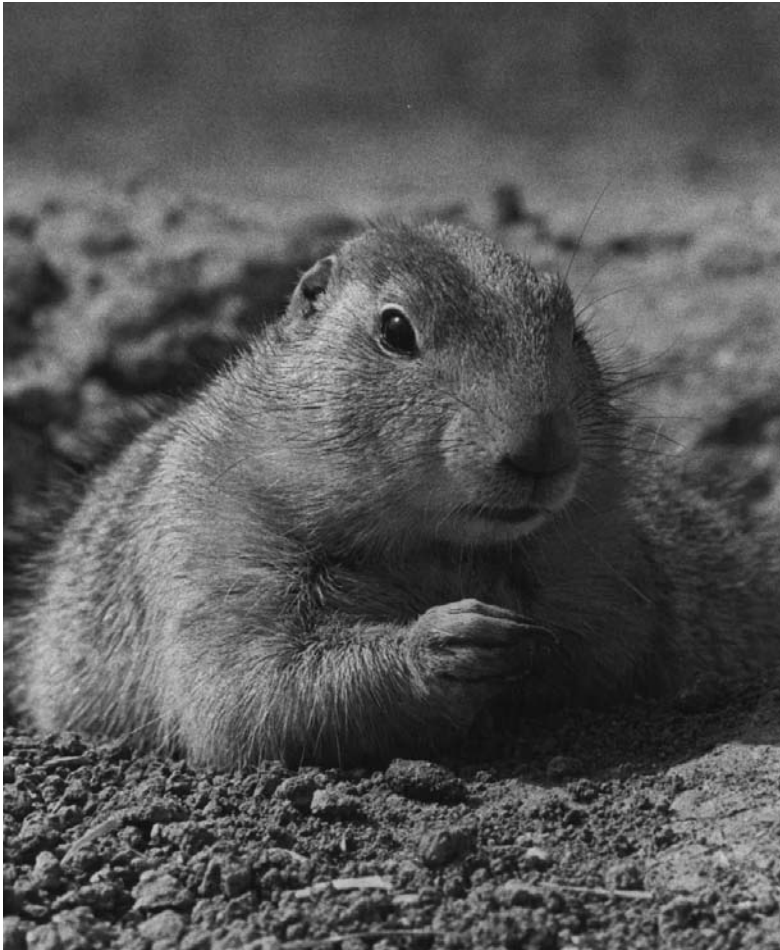

BOB MILES

**Black-tailed prairie dog**

---

Coati numbers fluctuate markedly, and at least two major population declines have been reported for Arizona. Recently, however, they appear to be expanding their range northward and are now common in such places as Aravaipa Canyon and the Sierra Ancha, where they were unheard of prior to 1970. Current hunt management authorizes a seven-month season, and a bag limit of one coati per calendar year.

## Gunnison's Prairie Dog

Prairie dogs are robust, diurnal ground squirrels that live in underground colonies called "dogtowns." Their tails are relatively short, less than 25 percent of the body length. The animals get their name from their doglike barks, which warn the colony of intruders. Male Gunnison's prairie dogs are just over a foot long, with 2-inch, grayish to white-tipped tails. Adult males weigh about 1.75 pounds and females less than 1.5 pounds. Male and female are similar in appearance, both a pale buff in color. The species is now largely restricted to Great Basin grasslands above the Mogollon Rim, although colonies formerly extended south and east of Prescott to the Dewey and Dugas areas, as well as to the San Carlos Indian Reservation.

### *Natural History and Status*

Gunnison's prairie dog colonies tend to be small, and usually contain fewer than 50 animals. Their burrow entrances are not typically built up into craters, unlike those of black-tailed prairie dogs. Gunnison's prairie dogs enter torpor below ground during winter months, and breed in February-March. The three to four pups typically appear in June. Grasses, forbs, and sedges are the usual dietary items.

## Black-tailed Prairie Dog

Slightly larger than the Gunnison's prairie dog, this 15-inch-long rodent is yellowish tan in color with a usually dusky-tipped 3-inch tail. Male black-tailed prairie dogs average about 2 pounds; the females about 1.9 pounds. Unlike those of Gunnison's, the entrances to the burrows of black-tailed prairie dogs often have cratered mounds that can reach up to 3 feet in height. The underground burrow network may be extensive, and black-tailed prairie dog colonies were often large, especially those in the San Pedro and Sulphur Springs valleys.

### *Natural History and Status*

Black-tailed prairie dogs are active all year, and will come out on sunny days even in midwinter. The species breeds in late February; the young are born in March

and appear in May. Dietary items include grass stems, grass roots, and shrubs.

Black-tailed prairie dogs formerly occurred in the semidesert grasslands of southeastern Arizona south of the Gila River, westward to the vicinity of Fort Huachuca. They have been extirpated in Arizona since 1959, although a small colony on the Day Ranch 15 miles southeast of Duncan on the Arizona-New Mexico border persisted until 1974. An attempt to reintroduce this animal to the Appleton Research Ranch (near Sonoita) in the summer of 1974 failed. The species has recently been protected in Arizona, in the hope that individuals from three colonies in Sonora within five miles of the United States-Mexico border might recolonize our state.

## SPECIALLY PROTECTED MAMMALS

---

The following mammals are protected at all times because they are endangered species, resemble endangered species, or are otherwise deemed in need of protection due to low numbers or vulnerability.

## Bats

Arizona, with 28 species of bats belonging to four families (ghost-faced, leaf-nosed, vesper, and free-tailed), has one of the most diverse bat faunas of any state. Ranging in abundance from the American free-tailed bat, which numbers in the millions, to the seldom-seen ghost-faced bat, Arizona's bats are highly beneficial. They feed on insects and find their prey by emitting and receiving sonic waves—a process similar to sonar and known as echolocation. Each species has its own high-pitched call, some of which can be heard by human ears. Our largest bat species, the western mastiff bat, is about 7 inches long and has a wingspan of up to 18 inches. The western pipistrelle, at only 2.5-3 inches long is Arizona's smallest bat. Some species, such as the spotted bat with its death's-head markings and huge ears, are bizarre in appearance.

### *Natural History and Status*

Although nearly all of Arizona's bats are insectivores, two, the lesser long-nosed bat and the Mexican long-tongued, feed on nectar and pollen. Some species, such as the red bat, are generally solitary, but most roost in colonies, selecting as their daytime retreat a particular cavern, rock fissure, or mine tunnel. Most bats are migratory, although a few over-winter by hibernating. To reduce competition, the various species use different habitats and feeding strategies. Pallid bats, for example, typically feed low to the ground; the western mastiff

bat tends to hunt high over water or in the tree canopy. It is also an unfortunate fact that bats transmit rabies, with the result that they expose dozens of people a year to this potentially deadly virus.

All bats are protected in Arizona due to their generally beneficial nature and the rarity of certain species. Colonial roost sites may also be protected, and certain caves have been declared “off-limits” because of their value to these intriguing flying mammals.

### Black-footed Ferret

This uniquely North American mammal has always been extremely rare in Arizona, with only four specimens ever collected in the state. Until a reintroduction program began in 1996, the last ferret reported in Arizona was in 1931 when bubonic plague and rodent control programs killed off the ferret’s prairie dog prey. The black-footed ferret is a low slung, weasel-like animal less than 2 feet in length, with sooty black feet. The overall color is a yellow-buff, the face has a distinctive black mask, and the approximately 5-inch tail is tipped in black. Males are significantly larger than females, weighing about 2.25 pounds to the female’s 1.5 pounds.

#### *Natural History and Status*

Ferrets are almost exclusively restricted to prairie dog colonies, which provide most of the animal’s food. The

ferret is primarily a nocturnal species. It breeds during mid-March or April, and after a gestation of 45 or so days give birth to from two to five young. The kits remain in a nest underground with their mother for 40 days or more and do not disperse to forage on their own until September, attaining breeding maturity at one year of age. The presence of ferrets can be detected by their tracks and diggings, which consist of 4-inch-deep trenches and lengthy piles of soil adjacent to prairie dog holes. Federally designated an endangered species in 1967, black-footed ferrets are the focus of an Arizona Game and Fish Department program to reintroduce captive-reared animals in Aubrey Valley. Although the project is still relatively young, some animals have already reproduced in the wild.

### Hualapai Mexican Vole

Voies or meadow mice are dark brown, short-tailed (<1.5”) terrestrial rodents with short fur and small, rounded ears. The sexes are nearly identical in pelage and size. The Mexican vole, to which this race belongs, is widely distributed at higher elevations, with populations found in the White Mountains, the San Francisco Peaks, along the Mogollon Rim, and in such isolated ranges as the Sierra Ancha, Bradshaw Mountains, Navajo Mountain, and Hualapai Mountains. The latter population, and possibly those on the Hualapai Indian Reservation to the north, has been described as a separate subspecies due to its isolation. The identifying

characters of this so-called Hualapai vole are not well defined, but are based on its having a smaller relative size, longer hind feet, and more cinnamon underparts than its closest neighbors.

#### *Natural History and Status*

This 1.25-inch-long rodent prefers dry, grassy meadows and canyons in proximity to ponderosa pines, Gambel’s oaks, pinyon-juniper woodlands, and chaparral. As with most rodents, numbers may fluctuate from rare to abundant. Not as prolific as some other rodents, their litter

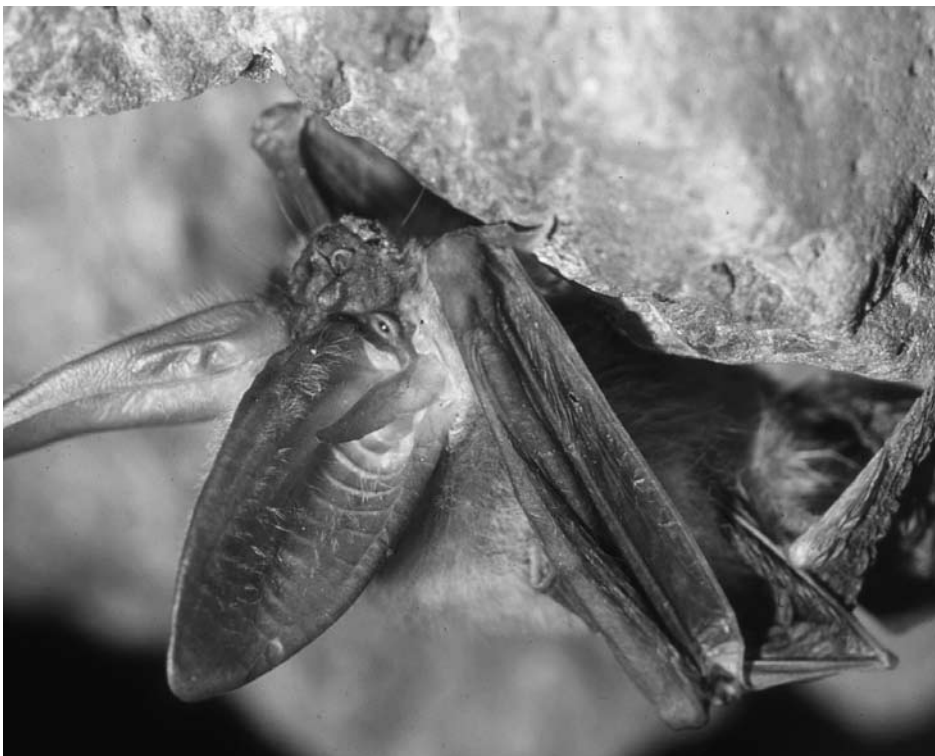

GEORGE ANDREIKO

**Townsend’s big-eared bat**

---

sizes vary from one to four and average about 2.5. This isolated population of Mexican voles is protected as a Federally endangered species

## Jaguar

More than 50 of these large, spotted cats have been documented from Arizona since 1900. Although there are some early records of what appear to be young jaguars, almost all of the animals taken or photographed after 1950 have been wandering males from Sonora, Mexico. The last recorded female in Arizona was taken in 1962.

Borderland jaguars tend to be small when compared to those in South America. The males average from about 125 to 160 pounds; the females are smaller, averaging about 110 pounds—approximately the same as mountain lions. Adult jaguars stand about 2.25 feet to 2.5 feet tall at the shoulder. The males average about 7 feet in length and the females about 6 feet. The tail is relatively short, about 17 to 30 inches and less than half of the length of the head and body. Dorsal colors range from a pale yellow-buff to a golden orange. The black spots on the head and shoulders are relatively small, transforming to a complicated series of bars, splotches and broken rings or rosettes on the back, flanks, feet and tail. Underneath, the jaguar varies from a very pale gray to snow white with black markings. Although appearing garish in the open, jaguars are in fact wonderfully concealed in the dappled shadows of their wooded and scrubland habitats.

The only New World “roaring cat,” jaguars call to each other by emitting a series of hoarse, rasping grunts.

### *Natural History and Status*

Although jaguars have been recorded as far north as the Grand Canyon, most have been recovered or photographed in the borderland mountains in the southeastern quarter of the state. Found primarily in tropical thornscrub and deciduous forest in Mexico, most Arizona jaguars have been encountered in Madrean evergreen woodlands and scrub-invaded semidesert grassland. Several jaguars have been taken in proximity to water, and several have been taken in montane conifer forests, at least one above 9,000 feet elevation.

Jaguars hunt mostly at twilight and at night, seeking a wide variety of prey. Prey items in Arizona have ranged from frogs to elk, but white-tailed deer, javelina, and coatis appear to be the most important natural prey. Livestock is taken when available, especially calves.

Female jaguars reach sexual maturity at about 2.5 years. For biological and social reasons, most males do not breed until age 3 to 4. The breeding season in the Southwest borderlands appears to be in January or

February, the young being born in spring after a 100-day gestation period. The one or two cubs are weaned at about 22 weeks, but female offspring may remain with the mother for more than a year. The average life span of Sonoran jaguars is thought to be less than 10 years due to the scarcity of game and their persecution as stock-killers. Jaguars have been protected in Arizona by state law since 1969, and U.S. populations were declared an endangered species in 1997. Prior to this time, jaguars have at various times been considered as furbearers, predators, or nongame mammals. The Department is engaged in a Conservation Team working to conserve jaguars of the Arizona-New Mexico-Mexico borderlands.

## Jaguarundi

These low slung, 10- to 20-pound felines require dense tropical vegetation and are usually found near water. The animal's head and ears appear small for a cat, and the 1- to 2-foot tail is less than the body length. Two color phases of these uniformly colored cats occur—cinnamon and charcoal gray. Largely terrestrial, jaguarundis take to trees only when pursued by dogs, at which time they can display much arboreal agility. More diurnal than other wild felids, jaguarundis usually occur alone or in pairs. The species also emits a whistle-like call on occasion.

### *Natural History and Status*

Jaguarundis feed on small mammals, such as cotton rats, as well as a variety of birds, lizards, and snakes. The breeding season varies with locality, but the gestation period is from 60 to 70 days after which from one to four kittens are born.

This species has never been documented as occurring in our state, or even southward in Sonora, Mexico. Jaguarundis have been protected here since 1972, on the basis of visual reports and the possibility that this animal might occur in Arizona. The species is included here only because it remains federally listed in Arizona.

## Ocelot

These 18- to 22-pound felines are not residents of Arizona, but rare visitors from Sonora, Mexico, where they occur primarily in tropical thornscrub. Their background color is a grayish or brownish orange color with black stripes and dots. Solitary and terrestrial, the “gato galavis,” as the species is known in Sonora, is largely nocturnal in its habits. Averaging about 22 pounds, male ocelots are slightly larger than the 19.5 pounds for the average female. The head and body length is approximately 3 to 3.5 feet, with the tail providing another 13 to 14 inches.

### *Natural History and Status*

Only four specimens have been documented from Arizona since 1887. Two of these were male, one from the Huachuca Mountains and another from the Dragoon Mountains. The sex of the other two animals is unknown, as are the locations. The life history of the gato galavis in Sonora remains largely uninvestigated, but the litter size in other ocelot populations is one or two. The kittens' eyes are shut for 2.5 weeks and they remain with their mother for 18 to 20 months. Most ocelots do not reach breeding maturity until 2 years old or more. Ocelots feed mostly on terrestrial mammals, such as cottontails, but reptiles are also taken. Adults may have a home range of 3,000 acres or more.

Ocelots have been protected in Arizona since 1969. Any change in the species' status is therefore difficult to ascertain, as any ocelots taken by trappers and/or predator control agents are unlikely to be reported.

## Otter (see Furbearers)

## Porcupine

These large, bulky rodents are unmistakable. The large head, long spines intermixed with equally long or longer blackish, brownish, and yellowish hair, and heavy claws make for instant identification. The males are bigger than the females, but the females have longer tails. Overall, the animal's total length is about 2.5 feet,

of which approximately 8 inches constitutes the tail. Weights range from 7.75 to 40 pounds depending on the porcupine's age and condition.

### *Natural History and Status*

Possessed of poor vision but with a good sense of smell, porcupines are active mainly at night. Habitats occupied include forested mountains, riparian forests, meadows, semidesert grasslands and even deserts. During the winter months, porcupines may feed almost exclusively on the inner bark of pine trees, although the bark of cottonwoods, mesquites, and ocotillos is also taken. Porcupines lose weight when feeding only on inner-bark, however, and also eat mistletoe, acorns, fungi, cactus fruit, and other mast when available. During the summer months, the species feeds on the ground and is frequently seen in mountain meadows feeding on grasses and sedges. Porcupines are fond of salt and will gnaw ax handles and other objects having this mineral.

Solitary animals, porcupines den in hollow trees and burrows as well as in rocky outcrops and mine shafts, often using the same den site year after year.

Females mature in one year, males in 2.5. Mating takes place in September and October, often in a tree, and is usually accompanied by highly vocal grunts, squeals, and shrieks. The males are very aggressive at this time and will fight any other males they happen to come upon. Gestation is seven months and the single offspring is born in late April or early May. The youngster, weighing about a pound, is highly developed and

well able to care for itself, staying with the mother only through its first summer. Probably because of their slow-paced life style, porcupines can live up to 9 years of age—a relatively long time for a rodent.

Although totally protected in Arizona, porcupines were unprotected for many years due to the damage inflicted on both mature ponderosa pines and pine seedlings, as evidenced by the trees' girdled trunks and white areas of peeled bark. As recently as the 1950s, hunters were encouraged to kill any porcupines encountered. Densities of porcupines appear to vary with time, however, and the species now appears much reduced in comparison to

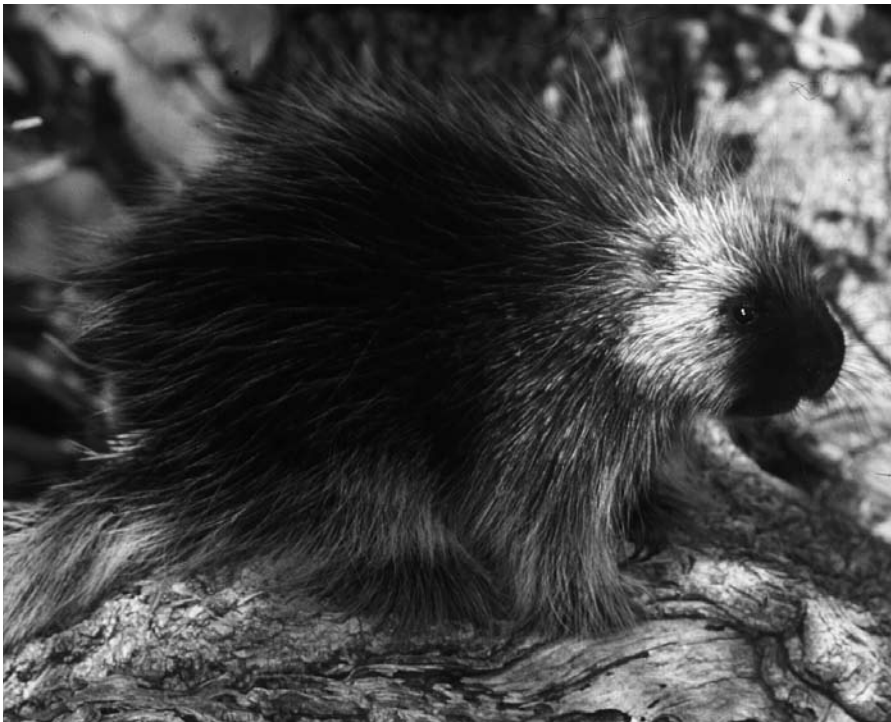

GEORGE ANDREIKO

Porcupine



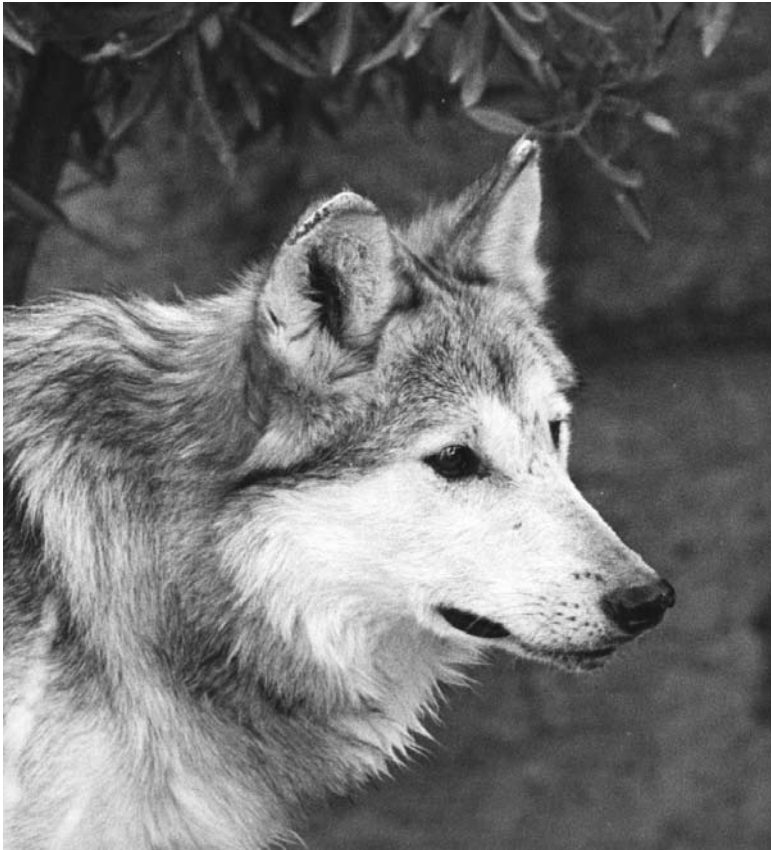

BOB MILES

### Mexican gray wolf

numbers reported earlier. Nonetheless, porcupines may still cause problems locally and require relocation to other areas.

## Gray Wolf

Now extirpated as a wild animal in Arizona, the gray wolf formerly occurred in small numbers throughout the eastern and northern portion of the state above 4,500 feet elevation. Southwestern wolves stand about 30 inches high at the shoulder, and differ from the much smaller (less than 35 pounds) coyotes by having heavier, deeper chests, impressive heads, shorter, thicker muzzles, larger nose pads, and a thicker neck that shows a ruff or mane when the animal's hackles are raised. Wolves also have long, slender forelegs and a dark-tipped tail. Coat color varies with season and individuals, some animals being so light as to be nearly white and others so dark as to appear almost black. The usual pelage, however, is a grizzled mixture of grays,

browns, blacks, and whites on backs and flanks. Adults are about 4.5 to 5.5 feet long, with 14 to 17 inch tails. The males are about 10 pounds heavier than the females, weighing between 65 and 85 pounds, versus the female's 55 to 80 pounds.

Perhaps the wolf's most distinctive trademark is its mournful howl, which is usually given in late fall and early winter, and which once heard, is never forgotten.

### *Natural History and Status*

Wolves are mostly active at night and hunt by trailing and running their prey to ground. Their preferred habitats are rolling woodlands, level forests, open meadows, and grasslands. Wolves historically fed on deer, elk, pronghorn, cottontails, and mice but readily adapted to taking sheep and cattle when livestock were introduced to Arizona.

For behavioral as well as biological reasons, wolves do not usually reach sexual maturity until they are about 2.5 years old. The breeding season in Arizona is between November

and mid February, and the gestation period is 63 days. Den sites are selected by the female, and may consist of an enlarged burrow, hollow log, or a natural crevice. Four to eight sooty-brown pups are born in the spring and nursed for six to eight weeks. They are cared for by both parents. Although they are weaned in late fall, when they are 2.5 to 3 months old, the young wolves, especially the females, may remain with the parents for another year or so before dispersing.

Wolves are social animals, but packs in Arizona have historically been small, usually consisting of from one or two to seven animals. Wolves can have very large home ranges and travel long distances in search of food and mates.

Long persecuted as the state's premier livestock predator, the last record of wild wolves breeding in Arizona was in 1944. In an attempt to reintroduce the species, captive-raised wolves, descended from Mexican stock, have been released in and near the Blue Range Primitive Area beginning in 1996.



# SUBSCRIBE TODAY!

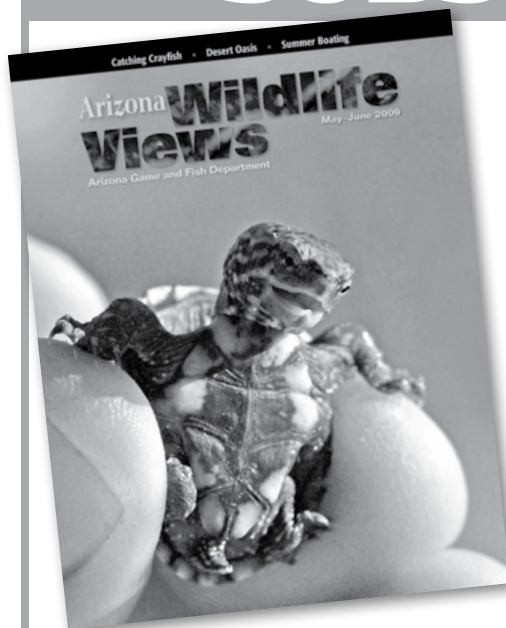

The official wildlife magazine of the Arizona Game and Fish Department published for outdoor enthusiasts!

## Arizona Wildlife Views Magazine

Arizona Wildlife Views is filled with stunning photography and informative articles on hunting, fishing, boating and other outdoor recreation opportunities plus in-depth coverage of important wildlife issues. Subscribe today to Arizona's premier wildlife magazine and begin to enjoy the benefits of the best in outdoor information!

**1 YEAR • 6 BIG ISSUES  
40 FULL-COLOR PAGES  
ONLY \$8.50**

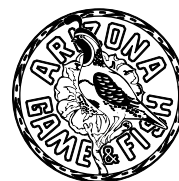

**Send no money now. We'll bill you later. CALL 1-800-777-0015**

## SIGN UP FOR FREE Arizona Game and Fish Department e-news

**The Arizona Game and Fish Department wants to communicate with you!** Our electronic information newsletters provide you with the latest news and information on wildlife issues and events, outdoor tips, education programs, regulations and more. Just provide us with your e-mail address and this information will come directly to you, **free of charge.**

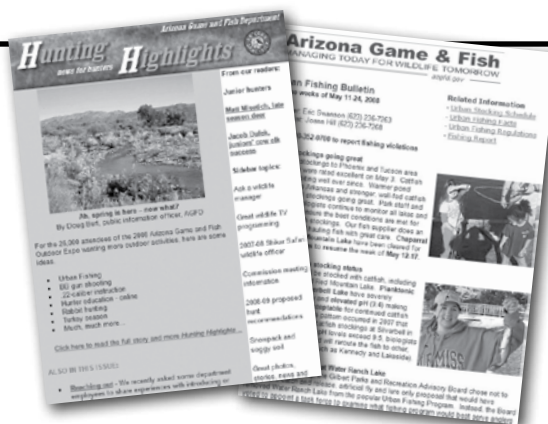

**SIGN UP TODAY!**  
[www.azgfd.gov/signup](http://www.azgfd.gov/signup)

To sign up for any of our products, visit [www.azgfd.gov/signup](http://www.azgfd.gov/signup) and select the e-mail newsletters you would like to receive:

- **Wildlife News:** Biweekly news about conservation, recreation, department news, and upcoming activities for the public.
- **Fishing Report:** Weekly updates on fishing conditions around the state.
- **Hunting Highlights:** Bimonthly news about hunting techniques, outlooks, where to go, and youth/family participation.
- **Shooting Sports News:** Updates on pistol, rifle, shotgun and archery target shooting and shooting range activities.
- **Urban Fishing Bulletin:** Biweekly updates on fishing opportunities at urban lakes.
- **Endangered Species Updates:** News on issues pertaining to conservation of at-risk wildlife.
- **Working for Wildlife:** Updates to keep the public informed on efforts to secure funding to meet future wildlife conservation needs.
- **OHV:** Periodic updates for OHV enthusiasts about the Arizona Game and Fish Department's off-highway vehicle program.
- **EdNews:** Updates on wildlife education resources for educators, youth group leaders and students.

# Game Management Unit Map

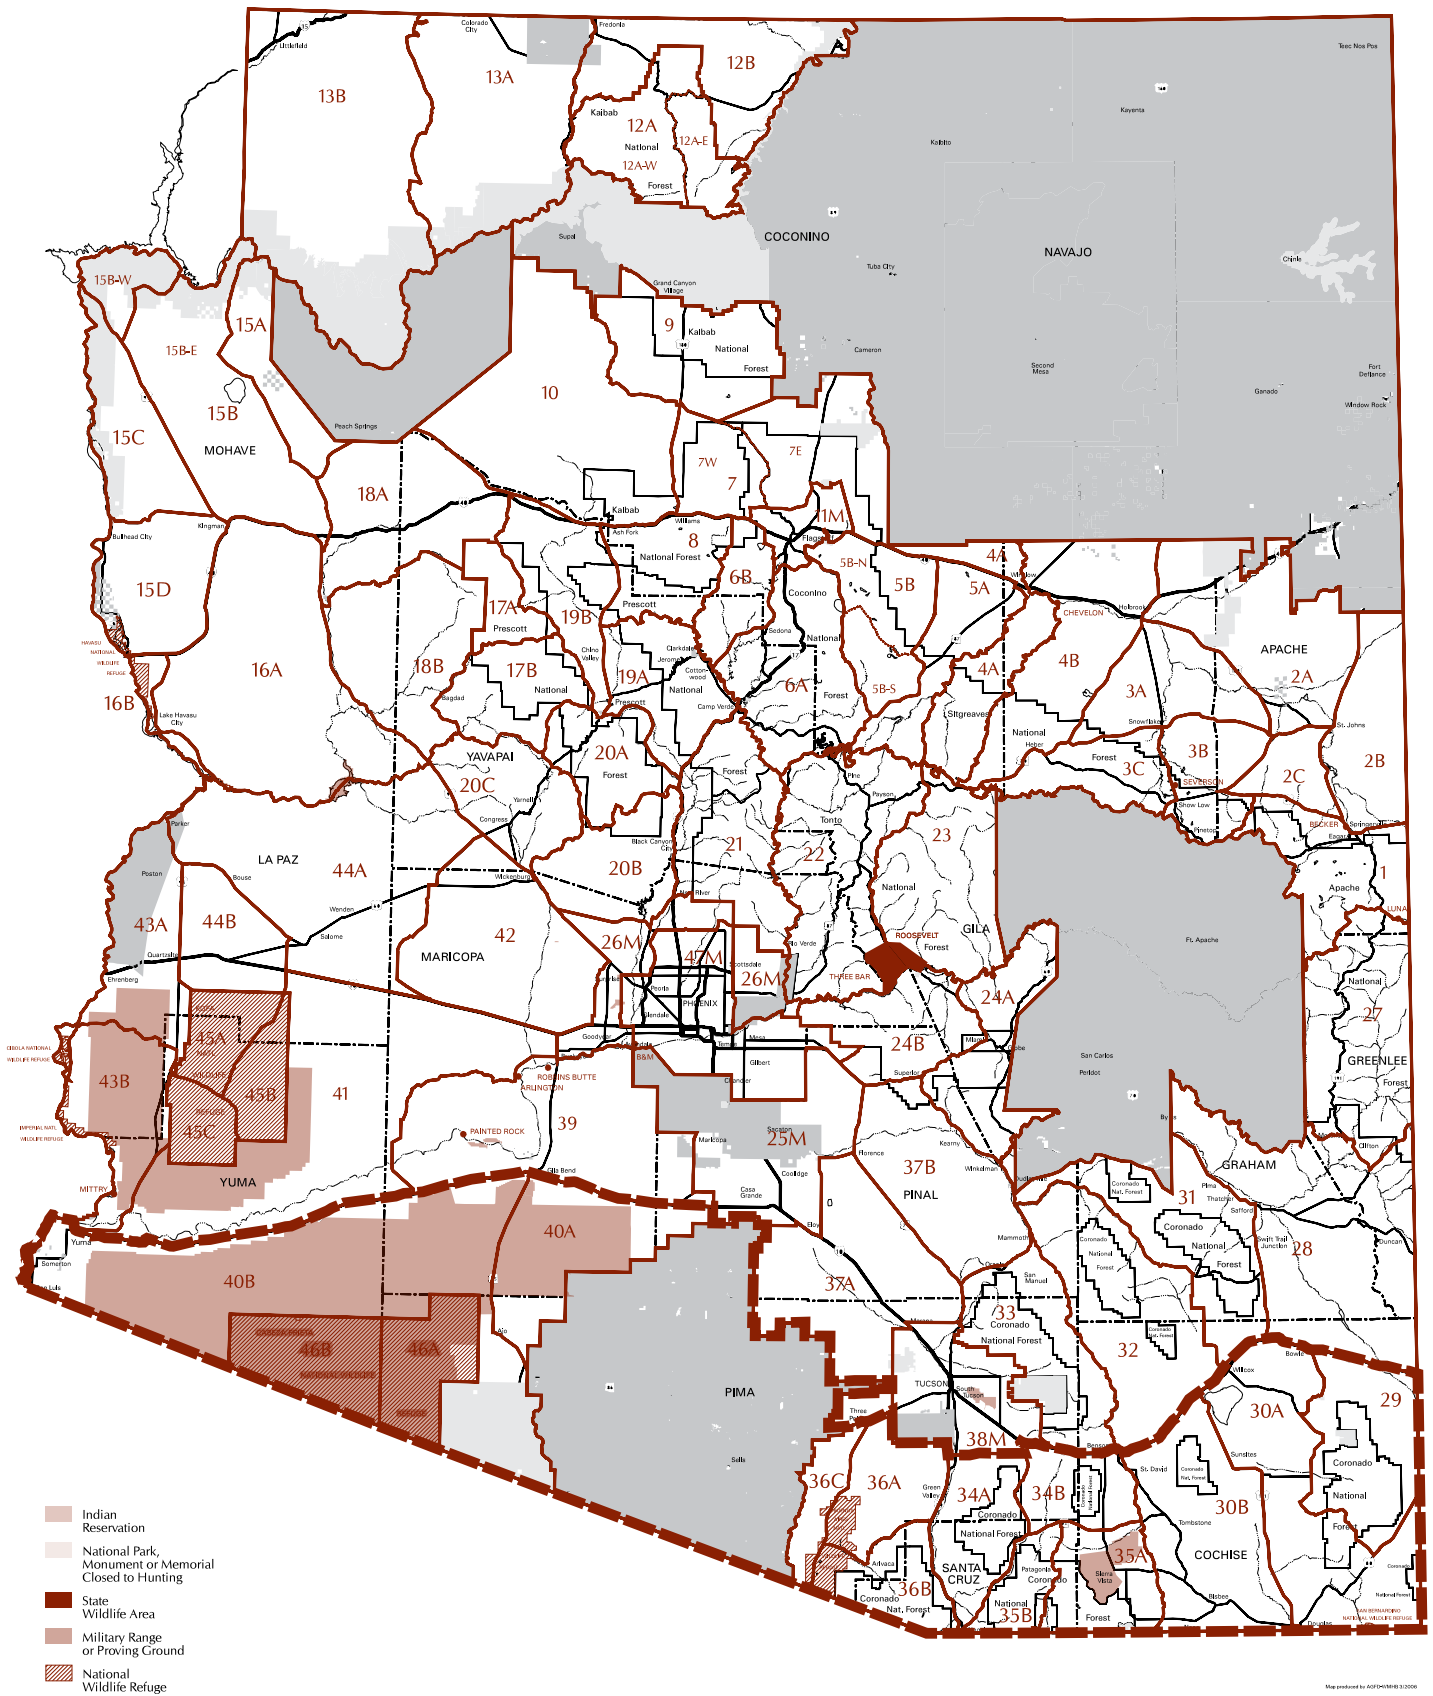

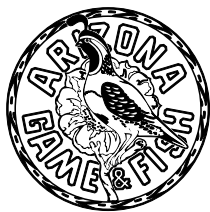

©2009

**Arizona Game and Fish Department**

5000 W. Carefree Highway • Phoenix, Arizona 85086 • (602) 942-3000

[www.azgfd.gov](http://www.azgfd.gov)
