# Supplementary material for: The Elephant in the room: What can we learn from California regarding the use of sport hunting of pumas (Puma concolor) as a management tool?
Source: PLOS journal article supplement (doi:10.1371/journal.pone.0224638), 2020-02-13
Supplement: S3 (10.1371/journal.pone.0224638.s003) [file journal.pone.0224638.s003]

## **Historic, archived document**

Do not assume content reflects current scientific knowledge, policies, or practices.

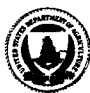

United States  
Department of  
Agriculture

National  
Agricultural  
Statistics  
Service

in cooperation with

Animal and  
Plant  
Health  
Inspection  
Service

NASS Staff Report  
LDP Number 92-02

October 1992

# **CATTLE AND CALVES DEATH LOSS 1991**

**Cattle and Calves Death Loss**, by Glenda L. Shepler, Livestock Section, Livestock, Dairy and Poultry Branch, Estimates Division, National Agricultural Statistics Service, U.S. Department of Agriculture, Washington, D.C. 20250. October 1992.

### **Abstract**

Survey data was collected in January 1992 to pick up data on death losses of cattle and calves from all causes. This report provides a detailed breakdown of the death losses by class and size group.

### **Acknowledgements**

The author would like to thank the Commodity Section, Statistical Methods Branch, for providing the class and size group breakdown data used to prepare this report.

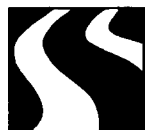

**National  
Agricultural  
Statistics  
Service**

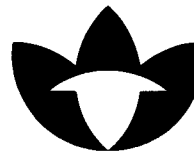

**Animal and  
Plant Health  
Inspection  
Service**

---

### **1991 Cattle and Calves Death Losses Total 4.37 Million Head**

A total of 4.37 million head of cattle and calves were lost from all causes during 1991 in the United States. This report provides class and size group breakdowns of these losses. Beef cattle operations accounted for 37.2 percent of the total cattle death losses during 1991. This includes death losses from all causes except predators. Other operations, which include primarily feedlots and/or yearling operations, lost 477,800 head, or 30.5 percent of the total. Twenty eight percent of the cattle losses, excluding predators, were attributed to dairy cattle operations.

Beef calves also accounted for the largest share of the total losses to calves less than 500 pounds with 42.4 percent of the total death losses, excluding predators. Dairy calves accounted for 35.7 percent while other calves were 15.8 percent of the total.

Digestive, respiratory and calving complications accounted for most of the causes of losses to cattle across all classes. The most predominant losses to calves across all classes came from digestive and respiratory problems.

This report is released as a cooperative effort between the National Agricultural Statistics Service and the National Animal Health Monitoring System of the Animal and Plant Health Inspection Service. Both agencies are part of the U.S. Department of Agriculture. This is the second release of 1991 death loss data and includes a further breakdown of data from the first release by class and size group.

# Losses of Cattle by Class

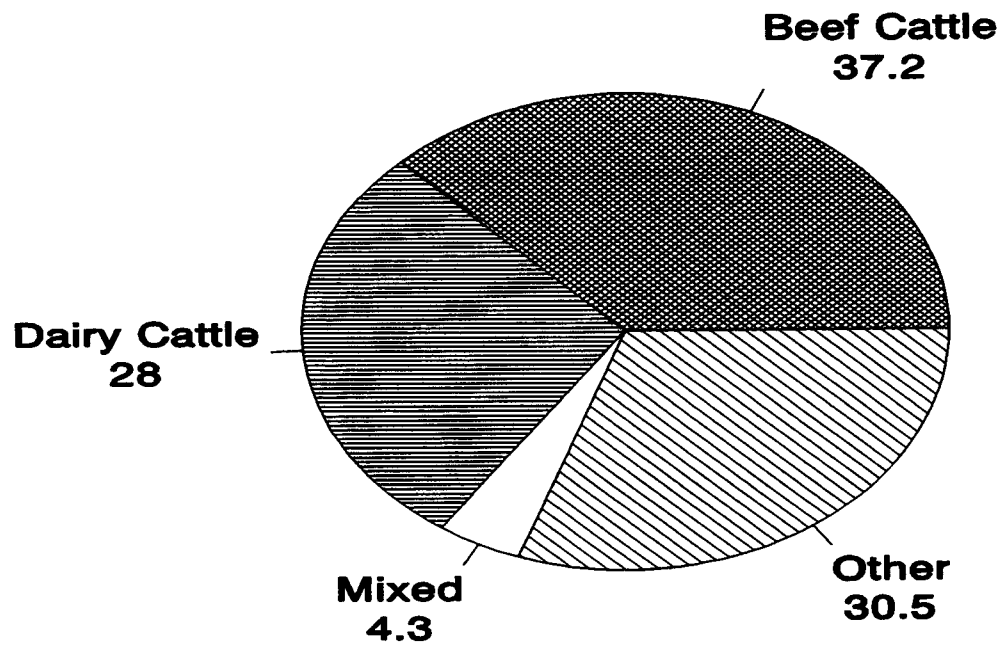

# Losses of Calves by Class

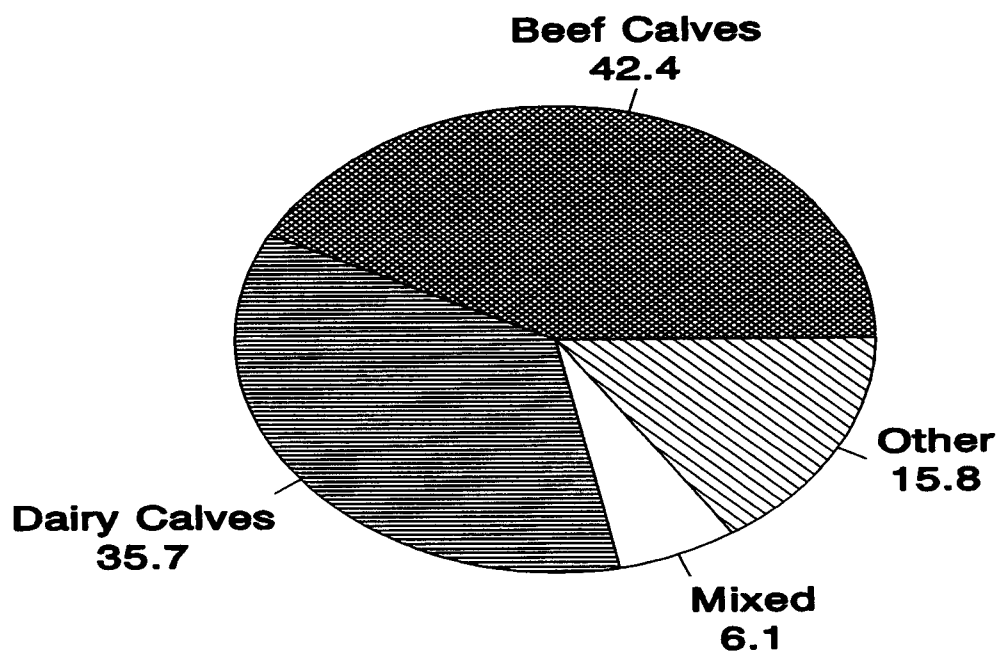

Losses of Cattle from All Causes, by Class and Total,  
by State, Region and United States, 1991

| State     | Total        | Other        |             |              |        |         | :Predators   |
|-----------|--------------|--------------|-------------|--------------|--------|---------|--------------|
|           | Total Cattle | Total Cattle | Beef Cattle | Dairy Cattle | Mixed  | Other   | Total Cattle |
|           | Head         |              |             |              |        |         |              |
| AL        | 23,000       | 22,700       | 12,400      | 5,200        | 900    | 4,200   | 300          |
| AZ        | 25,000       | 23,400       | 11,900      | 7,400        | 200    | 3,900   | 1,600        |
| AR        | 30,000       | 29,700       | 17,200      | 7,800        | 2,300  | 2,400   | 300          |
| CA        | 75,000       | 73,900       | 18,200      | 33,700       | 1,900  | 20,100  | 1,100        |
| CO        | 55,000       | 54,800       | 16,700      | 2,800        | 700    | 34,600  | 200          |
| CT        | 2,000        | 2,000        |             | 2,000        |        |         | 0            |
| DE        | 1,000        | 1,000        |             | 800          |        | 100     | 1/           |
| FL        | 22,000       | 21,600       | 11,900      | 7,700        | 1,900  | 100     | 400          |
| GA        | 32,000       | 31,600       | 14,500      | 14,300       | 1,800  | 1,000   | 400          |
| HI        | 3,000        | 3,000        | 2,200       | 600          | 0      | 100     | 1/           |
| ID        | 22,000       | 21,900       | 8,200       | 5,600        | 300    | 7,800   | 100          |
| IL        | 25,000       | 24,800       | 10,200      | 2,800        | 500    | 11,300  | 200          |
| IN        | 15,000       | 14,900       | 5,700       | 6,200        | 300    | 2,700   | 100          |
| IA        | 65,000       | 64,700       | 22,300      | 7,200        | 1,600  | 33,600  | 300          |
| KS        | 80,000       | 79,800       | 10,600      | 1,600        | 600    | 67,000  | 200          |
| KY        | 45,000       | 44,700       | 22,400      | 12,900       | 4,200  | 5,200   | 300          |
| LA        | 20,000       | 19,800       | 9,800       | 8,300        | 1,700  |         | 200          |
| ME        | 2,000        | 2,000        | 100         | 1,300        | 100    | 400     | 1/           |
| MD        | 5,000        | 4,900        | 1,000       | 3,500        | 400    |         | 100          |
| MA        | 1,000        | 1,000        |             | 900          |        |         | 1/           |
| MI        | 25,000       | 24,900       | 3,800       | 12,800       | 100    | 8,200   | 100          |
| MN        | 45,000       | 44,900       | 8,700       | 16,700       | 1,800  | 17,700  | 100          |
| MS        | 25,000       | 24,700       | 14,600      | 6,500        | 1,000  | 2,600   | 300          |
| MO        | 70,000       | 69,500       | 35,200      | 15,700       | 8,100  | 10,500  | 500          |
| MT        | 26,000       | 25,700       | 22,500      | 800          | 1,300  | 1,100   | 300          |
| NE        | 80,000       | 79,800       | 19,000      | 1,300        | 300    | 59,200  | 200          |
| NV        | 6,000        | 6,000        | 4,100       | 1,100        | 100    | 600     | 1/           |
| NH        | 1,000        | 1,000        |             | 900          |        |         | 0            |
| NJ        | 1,000        | 1,000        |             | 900          |        |         | 1/           |
| NM        | 19,000       | 18,000       | 7,400       | 6,300        | 400    | 3,900   | 1,000        |
| NY        | 33,000       | 33,000       | 600         | 29,500       | 1,500  | 1,300   | 1/           |
| NC        | 17,000       | 16,700       | 7,000       | 7,500        | 1,100  | 1,100   | 300          |
| ND        | 19,000       | 18,800       | 10,400      | 3,800        | 2,600  | 2,000   | 200          |
| OH        | 25,000       | 25,000       | 4,100       | 13,300       | 600    | 7,000   | 0            |
| OK        | 85,000       | 83,200       | 34,300      | 9,400        | 2,900  | 36,600  | 1,800        |
| OR        | 25,000       | 24,800       | 15,700      | 7,300        | 1,100  | 700     | 200          |
| PA        | 28,000       | 27,900       | 2,200       | 23,100       | 1,200  | 1,400   | 100          |
| RI        | 100          | 100          |             |              |        | 0       | 0            |
| SC        | 12,000       | 12,000       | 3,600       | 6,200        | 1,100  | 1,100   | 0            |
| SD        | 55,000       | 54,700       | 30,000      | 4,000        | 1,900  | 18,800  | 300          |
| TN        | 35,000       | 34,600       | 18,500      | 11,500       | 3,000  | 1,600   | 400          |
| TX        | 240,000      | 237,000      | 104,500     | 37,400       | 7,000  | 88,100  | 3,000        |
| UT        | 11,000       | 10,900       | 5,300       | 3,600        | 1,100  | 900     | 100          |
| VT        | 11,000       | 10,900       | 200         | 10,200       | 500    |         | 100          |
| VA        | 27,000       | 26,200       | 11,400      | 8,500        | 4,700  | 1,600   | 800          |
| WA        | 27,000       | 26,800       | 5,600       | 11,900       | 600    | 8,700   | 200          |
| WV        | 8,000        | 8,000        | 3,600       | 3,000        | 900    | 400     | 1/           |
| WI        | 65,000       | 65,000       | 3,100       | 52,900       | 3,500  | 5,500   | 0            |
| WY        | 15,000       | 14,900       | 12,400      | 100          | 100    | 2,300   | 100          |
| Mt & West | 868,100      | 857,500      | 339,000     | 138,900      | 23,200 | 356,400 | 10,600       |
| Midwest   | 365,000      | 363,400      | 110,300     | 135,400      | 18,800 | 98,900  | 1,600        |
| So & East | 351,000      | 347,300      | 133,800     | 164,900      | 26,100 | 22,500  | 3,700        |
| US        | 1,584,100    | 1,568,200    | 583,100     | 439,200      | 68,100 | 477,800 | 15,900       |

1/ Less than 100 head for the State, but number is included in U.S. total.  
Totals may not add due to rounding.

Losses of Beef Cattle from All Causes, by Size  
Group, State, Region and United States, 1991

| State      | All Causes <u>1/</u> |           |            |           |
|------------|----------------------|-----------|------------|-----------|
|            | Beef                 |           |            |           |
|            | Total                | 1-49 Head | 50-99 Head | 100+ Head |
|            | Head                 |           |            |           |
| AL         | 12,400               | 2,700     | 2,500      | 7,200     |
| AZ         | 11,900               |           | 100        | 11,800    |
| AR         | 17,200               | 4,700     | 4,700      | 7,800     |
| CA         | 18,200               | 1,400     | 800        | 16,000    |
| CO         | 16,700               | 1,200     | 800        | 14,700    |
| CT         |                      |           | 0          | 0         |
| DE         |                      |           |            |           |
| FL         | 11,900               | 300       | 600        | 11,000    |
| GA         | 14,500               | 4,400     | 3,300      | 6,800     |
| HI         | 2,200                |           |            | 2,200     |
| ID         | 8,200                | 400       | 400        | 7,400     |
| IL         | 10,200               | 4,800     | 3,000      | 2,400     |
| IN         | 5,700                | 1,600     | 300        | 3,800     |
| IA         | 22,300               | 8,300     | 6,000      | 8,000     |
| KS         | 10,600               | 2,600     | 1,800      | 6,200     |
| KY         | 22,400               | 10,500    | 6,000      | 5,900     |
| LA         | 9,800                | 1,800     | 2,300      | 5,700     |
| ME         | 100                  |           | 100        |           |
| MD         | 1,000                | 400       | 200        | 400       |
| MA         |                      |           |            |           |
| MI         | 3,800                | 1,200     | 500        | 2,100     |
| MN         | 8,700                | 4,100     | 2,700      | 1,900     |
| MS         | 14,600               | 2,900     | 2,700      | 9,000     |
| MO         | 35,200               | 9,400     | 8,600      | 17,200    |
| MT         | 22,500               | 700       | 1,400      | 20,400    |
| NE         | 19,000               | 2,200     | 1,300      | 15,500    |
| NV         | 4,100                |           | 100        | 4,000     |
| NH         |                      |           | 0          | 0         |
| NJ         |                      |           |            | 0         |
| NM         | 7,400                | 500       | 600        | 6,300     |
| NY         | 600                  | 500       | 100        |           |
| NC         | 7,000                | 2,600     | 1,200      | 3,200     |
| ND         | 10,400               | 1,300     | 2,600      | 6,500     |
| OH         | 4,100                | 2,700     | 300        | 1,100     |
| OK         | 34,300               | 9,800     | 6,600      | 17,900    |
| OR         | 15,700               | 800       | 500        | 14,400    |
| PA         | 2,200                | 1,500     | 300        | 400       |
| RI         |                      |           | 0          | 0         |
| SC         | 3,600                | 1,000     | 800        | 1,800     |
| SD         | 30,000               | 3,700     | 4,800      | 21,500    |
| TN         | 18,500               | 6,500     | 5,100      | 6,900     |
| TX         | 104,500              | 6,500     | 8,100      | 89,900    |
| UT         | 5,300                | 600       | 700        | 4,000     |
| VT         | 200                  | 200       |            |           |
| VA         | 11,400               | 2,000     | 2,400      | 7,000     |
| WA         | 5,600                | 500       | 300        | 4,800     |
| WV         | 3,600                | 1,400     | 1,000      | 1,200     |
| WI         | 3,100                | 1,600     | 400        | 1,100     |
| WY         | 12,400               | 400       | 700        | 11,300    |
| Mt. & West | 339,000              | 32,600    | 31,600     | 274,800   |
| Midwest    | 110,300              | 38,400    | 26,500     | 45,400    |
| So & East  | 133,800              | 38,700    | 28,600     | 66,500    |
| US         | 583,100              | 109,700   | 86,700     | 386,700   |

1/ Losses from all causes excludes predators. Totals may not add due to rounding.

Losses of Dairy Cattle from All Causes, by Size Group,  
State, Region and United States, 1991

| State     | All Causes <sup>1/</sup> |             |              |              |             |
|-----------|--------------------------|-------------|--------------|--------------|-------------|
|           | Dairy                    |             |              |              |             |
|           | Total                    | : 1-29 Head | : 30-49 Head | : 50-99 Head | : 100+ Head |
|           | Head                     |             |              |              |             |
| AL        | 5,200                    |             |              | 500          | 4,700       |
| AZ        | 7,400                    | 0           | 0            | 0            | 7,400       |
| AR        | 7,800                    |             | 100          | 3,100        | 4,600       |
| CA        | 33,700                   |             |              | 100          | 33,600      |
| CO        | 2,800                    |             |              | 200          | 2,600       |
| CT        | 2,000                    | 100         |              | 100          | 1,800       |
| DE        | 800                      |             | 0            |              | 800         |
| FL        | 7,700                    | 0           |              | 100          | 7,600       |
| GA        | 14,300                   | 0           |              | 1,000        | 13,300      |
| HI        | 600                      | 0           | 0            | 0            | 600         |
| ID        | 5,600                    |             | 200          | 500          | 4,900       |
| IL        | 2,800                    | 200         | 400          | 1,000        | 1,200       |
| IN        | 6,200                    | 100         | 600          | 1,900        | 3,600       |
| IA        | 7,200                    | 500         | 1,100        | 2,200        | 3,400       |
| KS        | 1,600                    | 100         |              | 400          | 1,100       |
| KY        | 12,900                   | 700         | 1,900        | 3,600        | 6,700       |
| LA        | 8,300                    |             |              | 1,900        | 6,400       |
| ME        | 1,300                    |             | 100          | 300          | 900         |
| MD        | 3,500                    |             | 200          | 600          | 2,700       |
| MA        | 900                      |             |              | 200          | 700         |
| MI        | 12,800                   | 500         | 900          | 3,300        | 8,100       |
| MN        | 16,700                   | 1,200       | 3,900        | 6,000        | 5,600       |
| MS        | 6,500                    | 200         |              | 1,500        | 4,800       |
| MO        | 15,700                   | 900         | 1,000        | 4,600        | 9,200       |
| MT        | 800                      |             | 0            | 100          | 700         |
| NE        | 1,300                    |             | 100          | 400          | 800         |
| NV        | 1,100                    |             | 0            |              | 1,100       |
| NH        | 900                      |             | 100          | 200          | 600         |
| NJ        | 900                      |             |              | 200          | 700         |
| NM        | 6,300                    |             | 0            |              | 6,300       |
| NY        | 29,500                   | 200         | 1,500        | 7,800        | 20,000      |
| NC        | 7,500                    |             | 200          | 1,400        | 5,900       |
| ND        | 3,800                    |             | 500          | 1,100        | 2,200       |
| OH        | 13,300                   | 700         | 1,200        | 4,100        | 7,300       |
| OK        | 9,400                    | 200         | 200          | 1,000        | 8,000       |
| OR        | 7,300                    |             |              | 400          | 6,900       |
| PA        | 23,100                   | 900         | 3,000        | 7,000        | 12,200      |
| RI        |                          |             |              |              |             |
| SC        | 6,200                    | 0           | 0            | 500          | 5,700       |
| SD        | 4,000                    | 200         | 400          | 700          | 2,700       |
| TN        | 11,500                   | 200         | 500          | 2,300        | 8,500       |
| TX        | 37,400                   | 100         | 500          | 1,200        | 35,600      |
| UT        | 3,600                    |             | 100          | 700          | 2,800       |
| VT        | 10,200                   |             | 1,400        | 2,200        | 6,600       |
| VA        | 8,500                    |             | 300          | 1,400        | 6,800       |
| WA        | 11,900                   |             |              | 500          | 11,400      |
| WV        | 3,000                    | 0           |              | 700          | 2,300       |
| WI        | 52,900                   | 2,700       | 7,600        | 17,600       | 25,000      |
| WY        | 100                      |             |              |              | 100         |
| Mt & West | 138,900                  | 600         | 2,000        | 7,300        | 129,000     |
| Midwest   | 135,400                  | 6,800       | 16,800       | 43,800       | 68,000      |
| So & East | 164,900                  | 2,300       | 9,200        | 33,500       | 119,900     |
| US        | 439,200                  | 9,700       | 28,000       | 84,600       | 316,900     |

<sup>1/</sup> Losses from all causes excludes predators. Totals may not add due to rounding.



Losses of Calves from All Causes, by Class and Total,  
by State, Region and United States, 1991

| State     | Total        |              | Other       |              |         |         | Predators    |  |
|-----------|--------------|--------------|-------------|--------------|---------|---------|--------------|--|
|           | Total Calves | Total Calves | Beef Calves | Dairy Calves | Mixed   | Other   | Total Calves |  |
|           |              |              |             | Head         |         |         |              |  |
| AL        | 30,000       | 27,900       | 15,900      | 7,300        | 1,700   | 3,000   | 2,100        |  |
| AZ        | 40,000       | 36,700       | 2,400       | 4,500        |         | 29,800  | 3,300        |  |
| AR        | 45,000       | 43,600       | 16,900      | 8,900        | 1,800   | 16,000  | 1,400        |  |
| CA        | 140,000      | 135,700      | 23,100      | 82,000       | 2,700   | 27,900  | 4,300        |  |
| CO        | 60,000       | 57,100       | 37,900      | 9,900        | 2,500   | 6,800   | 2,900        |  |
| CT        | 2,000        | 2,000        |             | 1,900        |         |         | 1/           |  |
| DE        | 1,000        | 1,000        |             | 1,000        |         |         | 1/           |  |
| FL        | 35,000       | 34,100       | 16,100      | 13,500       | 4,400   | 100     | 900          |  |
| GA        | 40,000       | 38,700       | 17,000      | 17,500       | 2,700   | 1,500   | 1,300        |  |
| HI        | 4,000        | 3,800        | 2,100       | 1,100        | 500     |         | 200          |  |
| ID        | 50,000       | 48,800       | 27,200      | 17,600       | 1,400   | 2,600   | 1,200        |  |
| IL        | 55,000       | 53,200       | 29,100      | 13,900       | 2,600   | 7,600   | 1,800        |  |
| IN        | 35,000       | 34,500       | 9,900       | 12,600       | 300     | 11,700  | 500          |  |
| IA        | 130,000      | 128,400      | 69,800      | 29,300       | 9,200   | 20,100  | 1,600        |  |
| KS        | 70,000       | 68,900       | 29,900      | 5,500        | 2,400   | 31,100  | 1,100        |  |
| KY        | 85,000       | 81,700       | 44,400      | 23,300       | 9,900   | 4,100   | 3,300        |  |
| LA        | 30,000       | 28,600       | 11,600      | 14,800       | 2,100   | 100     | 1,400        |  |
| ME        | 4,000        | 4,000        | 400         | 3,100        | 300     | 100     | 1/           |  |
| MD        | 8,000        | 8,000        | 1,700       | 5,500        | 800     |         | 0            |  |
| MA        | 2,000        | 2,000        | 100         | 1,700        | 100     |         | 1/           |  |
| MI        | 55,000       | 54,900       | 5,400       | 43,400       | 800     | 5,300   | 100          |  |
| MN        | 120,000      | 118,600      | 29,700      | 61,300       | 7,200   | 20,400  | 1,400        |  |
| MS        | 39,000       | 37,400       | 21,900      | 7,300        | 1,500   | 6,700   | 1,600        |  |
| MO        | 135,000      | 133,200      | 77,500      | 32,300       | 18,300  | 5,100   | 1,800        |  |
| MT        | 60,000       | 58,200       | 52,600      | 1,600        | 2,200   | 1,800   | 1,800        |  |
| NE        | 90,000       | 88,200       | 72,000      | 6,500        | 3,400   | 6,300   | 1,800        |  |
| NV        | 15,000       | 13,400       | 10,800      | 2,400        | 100     | 100     | 1,600        |  |
| NH        | 2,000        | 2,000        |             | 1,800        | 200     |         | 1/           |  |
| NJ        | 2,000        | 2,000        | 200         | 1,600        | 100     |         | 0            |  |
| NM        | 33,000       | 31,200       | 8,700       | 13,900       | 900     | 7,700   | 1,800        |  |
| NY        | 85,000       | 84,800       | 3,500       | 74,500       | 3,900   | 2,900   | 200          |  |
| NC        | 31,000       | 30,300       | 10,900      | 16,000       | 2,600   | 800     | 700          |  |
| ND        | 53,000       | 51,600       | 35,000      | 7,800        | 7,100   | 1,700   | 1,400        |  |
| OH        | 50,000       | 49,900       | 8,300       | 25,400       | 1,200   | 15,000  | 100          |  |
| OK        | 145,000      | 138,000      | 86,200      | 21,800       | 6,000   | 24,000  | 7,000        |  |
| OR        | 55,000       | 50,500       | 35,000      | 10,900       | 4,200   | 400     | 4,500        |  |
| PA        | 65,000       | 64,800       | 4,900       | 46,200       | 2,700   | 11,000  | 200          |  |
| RI        | 300          | 300          |             | 100          |         | 0       | 0            |  |
| SC        | 19,000       | 18,400       | 5,500       | 10,700       | 1,900   | 300     | 600          |  |
| SD        | 110,000      | 106,300      | 82,800      | 13,200       | 6,200   | 4,100   | 3,700        |  |
| TN        | 80,000       | 75,900       | 36,500      | 27,800       | 7,700   | 3,900   | 4,100        |  |
| TX        | 300,000      | 276,600      | 111,000     | 78,100       | 9,700   | 77,800  | 23,400       |  |
| UT        | 28,000       | 27,000       | 13,500      | 9,300        | 3,900   | 300     | 1,000        |  |
| VT        | 20,000       | 19,800       | 700         | 17,900       | 1,100   | 100     | 200          |  |
| VA        | 65,000       | 63,400       | 26,700      | 20,800       | 13,900  | 2,000   | 1,600        |  |
| WA        | 30,000       | 29,200       | 7,500       | 19,300       | 800     | 1,600   | 800          |  |
| WV        | 18,000       | 17,800       | 9,600       | 6,000        | 2,000   | 200     | 200          |  |
| WI        | 185,000      | 184,600      | 6,200       | 107,500      | 7,100   | 63,800  | 400          |  |
| WY        | 30,000       | 28,800       | 26,300      | 500          | 1,000   | 1,000   | 1,200        |  |
| Mt & West | 1,313,100    | 1,250,100    | 664,000     | 306,000      | 55,100  | 225,000 | 63,000       |  |
| Midwest   | 810,000      | 800,900      | 252,800     | 334,600      | 48,500  | 165,000 | 9,100        |  |
| So & East | 663,200      | 644,800      | 227,600     | 320,600      | 59,700  | 36,900  | 18,400       |  |
| US        | 2,786,300    | 2,695,800    | 1,144,400   | 961,200      | 163,300 | 426,900 | 90,500       |  |

1/ Less than 100 head for the State, but number is included in U.S. total.  
Totals may not add due to rounding.

**Losses of Beef Calves from All Causes, by Size Group,  
State, Region and United States, 1991**

| State     | All Causes <u>1/</u> |           |            |           |
|-----------|----------------------|-----------|------------|-----------|
|           | Beef                 |           |            |           |
|           | Total                | 1-49 Head | 50-99 Head | 100+ Head |
|           | Head                 |           |            |           |
| AL        | 15,900               | 3,800     | 2,800      | 9,300     |
| AZ        | 2,400                |           |            | 2,400     |
| AR        | 16,900               | 5,000     | 3,900      | 8,000     |
| CA        | 23,100               | 1,300     | 1,900      | 19,900    |
| CO        | 37,900               | 2,600     | 2,300      | 33,000    |
| CT        |                      |           | 0          | 0         |
| DE        |                      |           |            | 0         |
| FL        | 16,100               | 700       | 700        | 14,700    |
| GA        | 17,000               | 4,300     | 2,600      | 10,100    |
| HI        | 2,100                |           | 100        | 2,000     |
| ID        | 27,200               | 1,900     | 2,200      | 23,100    |
| IL        | 29,100               | 13,300    | 7,600      | 8,200     |
| IN        | 9,900                | 3,600     | 1,100      | 5,200     |
| IA        | 69,800               | 24,600    | 18,900     | 26,300    |
| KS        | 29,900               | 7,200     | 6,000      | 16,700    |
| KY        | 44,400               | 20,100    | 12,100     | 12,200    |
| LA        | 11,600               | 2,100     | 2,300      | 7,200     |
| ME        | 400                  | 300       | 100        |           |
| MD        | 1,700                | 800       | 300        | 600       |
| MA        | 100                  |           | 100        |           |
| MI        | 5,400                | 3,000     | 1,800      | 600       |
| MN        | 29,700               | 14,800    | 7,300      | 7,600     |
| MS        | 21,900               | 2,300     | 2,600      | 17,000    |
| MO        | 77,500               | 18,200    | 18,200     | 41,100    |
| MT        | 52,600               | 1,300     | 2,700      | 48,600    |
| NE        | 72,000               | 7,800     | 6,200      | 58,000    |
| NV        | 10,800               | 200       |            | 10,600    |
| NH        |                      |           |            | 0         |
| NJ        | 200                  | 100       | 100        |           |
| NM        | 8,700                | 900       | 800        | 7,000     |
| NY        | 3,500                | 1,500     | 1,600      | 400       |
| NC        | 10,900               | 4,900     | 2,000      | 4,000     |
| ND        | 35,000               | 3,800     | 6,800      | 24,400    |
| OH        | 8,300                | 4,100     | 1,000      | 3,200     |
| OK        | 86,200               | 21,100    | 16,000     | 49,100    |
| OR        | 35,000               | 2,000     | 1,500      | 31,500    |
| PA        | 4,900                | 3,200     | 500        | 1,200     |
| RI        |                      |           | 0          | 0         |
| SC        | 5,500                | 1,800     | 1,200      | 2,500     |
| SD        | 82,800               | 8,500     | 11,500     | 62,800    |
| TN        | 36,500               | 15,000    | 8,600      | 12,900    |
| TX        | 111,000              | 10,100    | 10,700     | 90,200    |
| UT        | 13,500               | 1,700     | 1,400      | 10,400    |
| VT        | 700                  | 400       | 100        | 200       |
| VA        | 26,700               | 5,900     | 6,100      | 14,700    |
| WA        | 7,500                | 600       | 700        | 6,200     |
| WV        | 9,600                | 3,800     | 2,100      | 3,700     |
| WI        | 6,200                | 3,100     | 1,000      | 2,100     |
| WY        | 26,300               | 800       | 1,200      | 24,300    |
| Mt & West | 664,000              | 71,800    | 72,000     | 520,200   |
| Midwest   | 252,800              | 89,700    | 60,800     | 102,300   |
| So & East | 227,600              | 71,000    | 45,900     | 110,700   |
| US        | 1,144,400            | 232,500   | 178,700    | 733,200   |

1/ Losses from all causes excludes predators. Totals may not add due to rounding.

Losses of Dairy Calves from All Causes, by Size Group,  
State, Region and United States, 1991

| State     | All Causes <u>1/</u> |           |            |            |           |
|-----------|----------------------|-----------|------------|------------|-----------|
|           | Dairy                |           |            |            |           |
|           | Total                | 1-29 Head | 30-49 Head | 50-99 Head | 100+ Head |
|           | Head                 |           |            |            |           |
| AL        | 7,300                | 200       |            | 900        | 6,200     |
| AZ        | 4,500                | 0         | 0          | 0          | 4,500     |
| AR        | 8,900                |           | 200        | 3,500      | 5,200     |
| CA        | 82,000               |           |            | 200        | 81,800    |
| CO        | 9,900                | 100       |            | 500        | 9,300     |
| CT        | 1,900                |           |            | 100        | 1,800     |
| DE        | 1,000                | 0         | 0          |            | 1,000     |
| FL        | 13,500               | 0         |            | 100        | 13,400    |
| GA        | 17,500               | 0         |            | 1,300      | 16,200    |
| HI        | 1,100                | 0         | 0          | 0          | 1,100     |
| ID        | 17,600               | 300       | 600        | 1,400      | 15,300    |
| IL        | 13,900               | 300       | 1,700      | 4,400      | 7,500     |
| IN        | 12,600               | 600       | 1,500      | 5,100      | 5,400     |
| IA        | 29,300               | 2,300     | 6,000      | 10,000     | 11,000    |
| KS        | 5,500                | 400       | 200        | 1,200      | 3,700     |
| KY        | 23,300               | 1,300     | 2,700      | 7,400      | 11,900    |
| LA        | 14,800               |           | 200        | 2,300      | 12,300    |
| ME        | 3,100                |           | 300        | 800        | 2,000     |
| MD        | 5,500                |           | 200        | 1,400      | 3,900     |
| MA        | 1,700                |           |            | 600        | 1,100     |
| MI        | 43,400               | 900       | 2,700      | 11,500     | 28,300    |
| MN        | 61,300               | 3,900     | 14,600     | 21,000     | 21,800    |
| MS        | 7,300                |           | 200        | 1,900      | 5,200     |
| MO        | 32,300               | 2,600     | 1,500      | 12,600     | 15,600    |
| MT        | 1,600                | 100       | 0          | 500        | 1,000     |
| NE        | 6,500                | 200       | 500        | 1,500      | 4,300     |
| NV        | 2,400                |           | 0          |            | 2,400     |
| NH        | 1,800                |           | 100        | 400        | 1,300     |
| NJ        | 1,600                |           |            | 300        | 1,300     |
| NM        | 13,900               | 500       | 0          | 100        | 13,300    |
| NY        | 74,500               | 1,200     | 3,700      | 16,800     | 52,800    |
| NC        | 16,000               | 0         | 200        | 2,300      | 13,500    |
| ND        | 7,800                | 100       | 800        | 2,300      | 4,600     |
| OH        | 25,400               | 1,300     | 2,300      | 7,100      | 14,700    |
| OK        | 21,800               | 200       | 500        | 2,900      | 18,200    |
| OR        | 10,900               |           | 200        | 900        | 9,800     |
| PA        | 46,200               | 2,200     | 8,100      | 13,000     | 22,900    |
| RI        | 100                  |           |            |            | 100       |
| SC        | 10,700               |           | 0          | 700        | 10,000    |
| SD        | 13,200               | 900       | 2,300      | 1,900      | 8,100     |
| TN        | 27,800               | 700       | 1,000      | 5,800      | 20,300    |
| TX        | 78,100               | 200       | 200        | 1,700      | 76,000    |
| UT        | 9,300                |           | 200        | 1,900      | 7,200     |
| VT        | 17,900               | 300       | 2,100      | 4,900      | 10,600    |
| VA        | 20,800               | 100       | 800        | 4,600      | 15,300    |
| WA        | 19,300               | 1,000     |            | 900        | 17,400    |
| WV        | 6,000                |           | 0          | 1,200      | 4,800     |
| WI        | 107,500              | 4,600     | 16,900     | 37,700     | 48,300    |
| WY        | 500                  | 200       |            | 200        | 100       |
| Mt & West | 306,000              | 4,200     | 5,500      | 18,100     | 278,200   |
| Midwest   | 334,600              | 16,500    | 47,400     | 112,900    | 157,800   |
| So & East | 320,600              | 6,000     | 19,600     | 66,800     | 228,200   |
| US        | 961,200              | 26,700    | 72,500     | 197,800    | 664,200   |

1/ Losses from all causes excludes predators. Totals may not add due to rounding.

Losses of Cattle from Digestive Problems, by Class and Total,  
by State, Region and United States, 1991

| State     | Digestive Problems |                |                 |       |        |
|-----------|--------------------|----------------|-----------------|-------|--------|
|           | Total<br>Cattle    | Beef<br>Cattle | Dairy<br>Cattle | Mixed | Other  |
|           | Head               |                |                 |       |        |
| AL        | 1,600              | 800            | 800             |       |        |
| AZ        | 5,400              | 1,900          | 1,900           | 0     | 1,600  |
| AR        | 2,200              | 1,500          | 700             |       |        |
| CA        | 12,000             | 1,200          | 6,000           | 200   | 4,600  |
| CO        | 6,600              | 1,100          | 200             | 100   | 5,200  |
| CT        | 100                | 0              | 100             |       | 0      |
| DE        | 100                | 0              | 100             |       | 0      |
| FL        | 1,000              | 300            | 600             | 100   |        |
| GA        | 3,700              | 1,700          | 1,700           | 200   | 100    |
| HI        | 200                | 100            | 100             | 0     | 0      |
| ID        | 3,000              | 900            | 900             | 100   | 1,100  |
| IL        | 3,700              | 1,200          | 500             | 100   | 1,900  |
| IN        | 1,800              | 400            | 1,100           |       | 300    |
| IA        | 10,000             | 3,200          | 1,500           | 300   | 5,000  |
| KS        | 19,600             | 500            | 100             |       | 19,000 |
| KY        | 5,600              | 2,500          | 2,100           | 700   | 300    |
| LA        | 3,500              | 2,000          | 1,300           | 200   | 0      |
| ME        | 300                |                | 200             | 0     | 100    |
| MD        | 800                | 100            | 600             | 100   |        |
| MA        | 100                | 0              | 100             |       |        |
| MI        | 4,600              | 1,200          | 2,500           | 100   | 800    |
| MN        | 5,900              | 1,200          | 1,800           | 200   | 2,700  |
| MS        | 2,600              | 1,500          | 700             | 300   | 100    |
| MO        | 4,400              | 1,400          | 1,000           | 600   | 1,400  |
| MT        | 4,000              | 3,300          | 400             | 200   | 100    |
| NE        | 9,400              | 1,200          | 100             |       | 8,100  |
| NV        | 400                | 200            | 100             |       | 100    |
| NH        | 1/                 | 0              |                 |       | 0      |
| NJ        | 100                | 0              | 100             |       | 0      |
| NM        | 2,000              | 500            | 1,100           | 0     | 400    |
| NY        | 5,200              | 100            | 4,600           | 300   | 200    |
| NC        | 600                | 300            | 200             | 100   |        |
| ND        | 3,100              | 1,500          | 500             | 500   | 600    |
| OH        | 3,300              | 400            | 1,700           | 100   | 1,100  |
| OK        | 9,100              | 4,800          | 1,800           | 600   | 1,900  |
| OR        | 4,600              | 2,600          | 2,000           |       |        |
| PA        | 3,300              | 200            | 2,800           | 100   | 200    |
| RI        | 0                  | 0              | 0               | 0     | 0      |
| SC        | 2,500              | 800            | 1,100           | 500   | 100    |
| SD        | 8,100              | 3,000          | 500             | 200   | 4,400  |
| TN        | 3,200              | 1,400          | 1,700           | 100   | 0      |
| TX        | 18,600             | 4,700          | 4,000           | 1,100 | 8,800  |
| UT        | 2,100              | 700            | 800             | 300   | 300    |
| VT        | 800                |                | 700             | 100   | 0      |
| VA        | 2,600              | 1,200          | 1,100           | 200   | 100    |
| WA        | 5,100              | 600            | 2,000           | 100   | 2,400  |
| WV        | 1,100              | 500            | 400             | 200   |        |
| WI        | 10,100             | 300            | 8,500           | 700   | 600    |
| WY        | 2,200              | 1,400          | 100             |       | 700    |
| Mt & West | 115,500            | 30,200         | 22,600          | 3,400 | 59,300 |
| Midwest   | 46,000             | 10,800         | 19,300          | 2,100 | 13,800 |
| So & East | 38,900             | 13,400         | 21,000          | 3,200 | 1,300  |
| US        | 200,400            | 54,400         | 62,900          | 8,700 | 74,400 |

1/ Less than 100 head for the State, but number is included in U.S. total.  
Totals may not add due to rounding.

Losses of Beef Cattle from Digestive Problems, by Size Group,  
State, Region and United States, 1991 <sup>1/</sup>

| State     | Digestive Problems |           |            |           |
|-----------|--------------------|-----------|------------|-----------|
|           | Beef               |           |            |           |
|           | Total              | 1-49 Head | 50-99 Head | 100+ Head |
|           | Head               |           |            |           |
| AL        | 800                | 100       | 300        | 400       |
| AZ        | 1,900              | 0         | 0          | 1,900     |
| AR        | 1,500              | 700       | 300        | 500       |
| CA        | 1,200              | 100       | 100        | 1,000     |
| CO        | 1,100              | 100       |            | 1,000     |
| CT        | 0                  | 0         | 0          | 0         |
| DE        | 0                  | 0         | 0          | 0         |
| FL        | 300                |           | 100        | 200       |
| GA        | 1,700              | 400       | 300        | 1,000     |
| HI        | 100                | 0         |            | 100       |
| ID        | 900                | 100       |            | 800       |
| IL        | 1,200              | 700       | 300        | 200       |
| IN        | 400                | 200       |            | 200       |
| IA        | 3,200              | 1,400     | 1,000      | 800       |
| KS        | 500                | 100       | 100        | 300       |
| KY        | 2,500              | 1,700     | 300        | 500       |
| LA        | 2,000              | 400       | 300        | 1,300     |
| ME        |                    |           | 0          | 0         |
| MD        | 100                | 100       |            |           |
| MA        | 0                  | 0         | 0          | 0         |
| MI        | 1,200              | 200       |            | 1,000     |
| MN        | 1,200              | 700       | 400        | 100       |
| MS        | 1,500              | 200       | 200        | 1,100     |
| MO        | 1,400              | 500       | 300        | 600       |
| MT        | 3,300              | 100       | 200        | 3,000     |
| NE        | 1,200              | 200       | 100        | 900       |
| NV        | 200                |           | 0          | 200       |
| NH        | 0                  | 0         | 0          | 0         |
| NJ        | 0                  | 0         | 0          | 0         |
| NM        | 500                |           |            | 500       |
| NY        | 100                | 100       |            |           |
| NC        | 300                | 200       | 0          | 100       |
| ND        | 1,500              | 100       | 500        | 900       |
| OH        | 400                | 400       |            | 0         |
| OK        | 4,800              | 1,400     | 800        | 2,600     |
| OR        | 2,600              |           | 100        | 2,500     |
| PA        | 200                | 100       | 100        |           |
| RI        | 0                  | 0         | 0          | 0         |
| SC        | 800                | 300       | 100        | 400       |
| SD        | 3,000              | 400       | 700        | 1,900     |
| TN        | 1,400              | 400       | 600        | 400       |
| TX        | 4,700              | 300       | 300        | 4,100     |
| UT        | 700                | 100       | 100        | 500       |
| VT        |                    |           | 0          | 0         |
| VA        | 1,200              | 300       | 600        | 300       |
| WA        | 600                | 100       | 100        | 400       |
| WV        | 500                | 200       | 100        | 200       |
| WI        | 300                | 200       | 0          | 100       |
| WY        | 1,400              |           | 100        | 1,300     |
| Mt & West | 30,200             | 3,100     | 3,200      | 23,900    |
| Midwest   | 10,800             | 5,000     | 2,300      | 3,500     |
| So & East | 13,400             | 4,500     | 3,000      | 5,900     |
| US        | 54,400             | 12,600    | 8,500      | 33,300    |

<sup>1/</sup> Totals may not add due to rounding.

Losses of Dairy Cattle from Digestive Problems, by Size Group,  
State, Region and United States, 1991 <sup>1/</sup>

| State     | Digestive Problems |           |            |            |           |
|-----------|--------------------|-----------|------------|------------|-----------|
|           | Dairy              |           |            |            |           |
|           | Total              | 1-29 Head | 30-49 Head | 50-99 Head | 100+ Head |
|           | Head               |           |            |            |           |
| AL        | 800                | 0         | 0          | 100        | 700       |
| AZ        | 1,900              | 0         | 0          | 0          | 1,900     |
| AR        | 700                | 0         | 0          | 300        | 400       |
| CA        | 6,000              | 0         | 0          | 0          | 6,000     |
| CO        | 200                | 0         | 0          | 0          | 200       |
| CT        | 100                | 0         | 0          | 0          | 100       |
| DE        | 100                | 0         | 0          | 0          | 100       |
| FL        | 600                | 0         | 0          | 0          | 600       |
| GA        | 1,700              | 0         | 0          | 100        | 1,600     |
| HI        | 100                | 0         | 0          | 0          | 100       |
| ID        | 900                | 0         | 0          | 100        | 800       |
| IL        | 500                | 100       | 100        | 100        | 200       |
| IN        | 1,100              | 0         | 200        | 400        | 500       |
| IA        | 1,500              | 100       | 200        | 300        | 900       |
| KS        | 100                | 0         | 0          | 0          | 100       |
| KY        | 2,100              | 0         | 400        | 500        | 1,200     |
| LA        | 1,300              | 0         | 0          | 400        | 900       |
| ME        | 200                | 0         | 0          | 0          | 200       |
| MD        | 600                | 0         | 0          | 200        | 400       |
| MA        | 100                | 0         | 0          | 0          | 100       |
| MI        | 2,500              | 0         | 100        | 600        | 1,800     |
| MN        | 1,800              | 200       | 400        | 600        | 600       |
| MS        | 700                | 0         | 0          | 200        | 500       |
| MO        | 1,000              | 0         | 0          | 300        | 700       |
| MT        | 400                | 0         | 0          | 100        | 300       |
| NE        | 100                | 0         | 0          | 0          | 100       |
| NV        | 100                | 0         | 0          | 0          | 100       |
| NH        | 0                  | 0         | 0          | 0          | 0         |
| NJ        | 100                | 0         | 0          | 0          | 100       |
| NM        | 1,100              | 0         | 0          | 0          | 1,100     |
| NY        | 4,600              | 0         | 200        | 1,200      | 3,200     |
| NC        | 200                | 0         | 0          | 0          | 200       |
| ND        | 500                | 0         | 100        | 100        | 300       |
| OH        | 1,700              | 100       | 200        | 600        | 800       |
| OK        | 1,800              | 0         | 0          | 100        | 1,700     |
| OR        | 2,000              | 0         | 0          | 0          | 2,000     |
| PA        | 2,800              | 100       | 400        | 700        | 1,600     |
| RI        | 0                  | 0         | 0          | 0          | 0         |
| SC        | 1,100              | 0         | 0          | 100        | 1,000     |
| SD        | 500                | 0         | 100        | 0          | 400       |
| TN        | 1,700              | 0         | 0          | 400        | 1,300     |
| TX        | 4,000              | 0         | 100        | 100        | 3,800     |
| UT        | 800                | 0         | 100        | 200        | 500       |
| VT        | 700                | 0         | 0          | 300        | 400       |
| VA        | 1,100              | 0         | 0          | 200        | 900       |
| WA        | 2,000              | 0         | 0          | 0          | 2,000     |
| WV        | 400                | 0         | 0          | 0          | 400       |
| WI        | 8,500              | 300       | 900        | 1,900      | 5,400     |
| WY        | 100                | 0         | 0          | 0          | 100       |
| Mt & West | 22,600             | 0         | 400        | 700        | 21,500    |
| Midwest   | 19,300             | 800       | 2,100      | 5,100      | 11,300    |
| So & East | 21,000             | 100       | 1,000      | 4,600      | 15,300    |
| US        | 62,900             | 900       | 3,500      | 10,400     | 48,100    |

<sup>1/</sup> Totals may not add due to rounding.

Losses of Calves from Digestive Problems, by Class and Total,  
by State, Region and United States, 1991

| State     | Digestive Problems |             |              |        |        |
|-----------|--------------------|-------------|--------------|--------|--------|
|           | Total Calves       | Beef Calves | Dairy Calves | Mixed  | Other  |
|           | Head               |             |              |        |        |
| AL        | 5,500              | 2,200       | 2,300        | 1,000  |        |
| AZ        | 12,000             | 400         | 1,700        |        | 9,900  |
| AR        | 6,600              | 2,800       | 2,700        | 900    | 200    |
| CA        | 28,900             | 3,800       | 22,600       | 600    | 1,900  |
| CO        | 11,200             | 6,800       | 2,700        | 800    | 900    |
| CT        | 900                |             | 900          |        |        |
| DE        | 300                | 0           | 300          |        |        |
| FL        | 7,800              | 1,100       | 4,700        | 2,000  | 0      |
| GA        | 9,500              | 2,700       | 6,400        | 300    | 100    |
| HI        | 200                |             | 200          |        | 0      |
| ID        | 13,000             | 6,500       | 5,300        | 600    | 600    |
| IL        | 12,500             | 5,000       | 5,300        | 1,000  | 1,200  |
| IN        | 9,200              | 1,600       | 5,100        | 100    | 2,400  |
| IA        | 28,300             | 13,600      | 8,800        | 2,600  | 3,300  |
| KS        | 10,000             | 5,000       | 1,800        | 600    | 2,600  |
| KY        | 21,700             | 8,200       | 6,700        | 5,200  | 1,600  |
| LA        | 9,300              | 2,100       | 6,500        | 700    | 0      |
| ME        | 1,400              |             | 1,200        | 200    |        |
| MD        | 3,400              | 500         | 2,700        | 200    |        |
| MA        | 900                |             | 800          | 100    | 0      |
| MI        | 20,600             | 1,000       | 17,600       | 300    | 1,700  |
| MN        | 43,200             | 7,200       | 27,800       | 2,100  | 6,100  |
| MS        | 4,600              | 1,500       | 2,100        | 700    | 300    |
| MO        | 39,000             | 15,700      | 15,000       | 7,400  | 900    |
| MT        | 16,200             | 14,700      | 700          | 700    | 100    |
| NE        | 27,200             | 22,600      | 2,700        | 1,000  | 900    |
| NV        | 3,400              | 2,300       | 1,100        |        |        |
| NH        | 600                |             | 600          |        |        |
| NJ        | 1,000              |             | 900          | 100    |        |
| NM        | 2,500              | 600         | 1,600        | 0      | 300    |
| NY        | 32,800             | 700         | 29,600       | 1,900  | 600    |
| NC        | 8,100              | 1,300       | 5,300        | 1,100  | 400    |
| ND        | 18,500             | 10,700      | 3,500        | 3,800  | 500    |
| OH        | 19,800             | 2,300       | 10,100       | 400    | 7,000  |
| OK        | 20,300             | 9,900       | 7,800        | 1,800  | 800    |
| OR        | 10,800             | 6,200       | 3,200        | 1,400  |        |
| PA        | 23,100             | 1,300       | 19,600       | 900    | 1,300  |
| RI        | 1/                 |             |              |        | 0      |
| SC        | 4,700              | 400         | 3,300        | 900    | 100    |
| SD        | 33,400             | 25,500      | 4,400        | 2,500  | 1,000  |
| TN        | 24,200             | 6,800       | 13,100       | 2,800  | 1,500  |
| TX        | 31,900             | 7,400       | 20,500       | 3,100  | 900    |
| UT        | 8,100              | 3,300       | 3,300        | 1,500  |        |
| VT        | 5,500              | 100         | 5,100        | 200    | 100    |
| VA        | 16,300             | 4,700       | 6,200        | 5,200  | 200    |
| WA        | 11,100             | 2,200       | 8,000        | 100    | 800    |
| WV        | 5,100              | 1,500       | 2,800        | 800    | 0      |
| WI        | 69,200             | 1,600       | 47,000       | 3,300  | 17,300 |
| WY        | 7,300              | 6,200       | 200          | 400    | 500    |
| Mt & West | 266,000            | 134,100     | 91,300       | 18,900 | 21,700 |
| Midwest   | 248,400            | 50,800      | 139,400      | 18,100 | 40,100 |
| So & East | 186,800            | 35,100      | 121,100      | 24,300 | 6,300  |
| US        | 701,200            | 220,000     | 351,800      | 61,300 | 68,100 |

1/ Totals may not add due to rounding.

Losses of Beef Calves from Digestive Problems, by Size Group,  
State, Region and United States, 1991 <sup>1/</sup>

| State     | Digestive Problems |           |            |           |
|-----------|--------------------|-----------|------------|-----------|
|           | Beef               |           |            |           |
|           | Total              | 1-49 Head | 50-99 Head | 100+ Head |
|           | Head               |           |            |           |
| AL        | 2,200              | 200       | 200        | 1,800     |
| AZ        | 400                |           |            | 400       |
| AR        | 2,800              | 500       | 800        | 1,500     |
| CA        | 3,800              | 300       | 100        | 3,400     |
| CO        | 6,800              | 400       | 200        | 6,200     |
| CT        |                    |           | 0          | 0         |
| DE        | 0                  | 0         | 0          | 0         |
| FL        | 1,100              | 100       | 100        | 900       |
| GA        | 2,700              | 500       | 300        | 1,900     |
| HI        |                    | 0         | 0          |           |
| ID        | 6,500              | 500       | 600        | 5,400     |
| IL        | 5,000              | 1,800     | 1,400      | 1,800     |
| IN        | 1,600              | 600       | 300        | 700       |
| IA        | 13,600             | 5,700     | 3,700      | 4,200     |
| KS        | 5,000              | 500       | 1,300      | 3,200     |
| KY        | 8,200              | 3,000     | 2,600      | 2,600     |
| LA        | 2,100              | 400       | 400        | 1,300     |
| ME        |                    | 0         | 0          |           |
| MD        | 500                | 200       |            | 300       |
| MA        |                    |           |            | 0         |
| MI        | 1,000              | 700       | 100        | 200       |
| MN        | 7,200              | 3,400     | 1,900      | 1,900     |
| MS        | 1,500              | 200       | 200        | 1,100     |
| MO        | 15,700             | 2,700     | 2,700      | 10,300    |
| MT        | 14,700             | 200       | 600        | 13,900    |
| NE        | 22,600             | 1,600     | 2,100      | 18,900    |
| NV        | 2,300              |           |            | 2,300     |
| NH        |                    |           | 0          | 0         |
| NJ        |                    |           | 0          | 0         |
| NM        | 600                | 100       |            | 500       |
| NY        | 700                | 200       | 200        | 300       |
| NC        | 1,300              | 700       | 100        | 500       |
| ND        | 10,700             | 900       | 1,800      | 8,000     |
| OH        | 2,300              | 800       | 200        | 1,300     |
| OK        | 9,900              | 2,100     | 1,000      | 6,800     |
| OR        | 6,200              | 400       | 200        | 5,600     |
| PA        | 1,300              | 800       | 300        | 200       |
| RI        |                    |           | 0          | 0         |
| SC        | 400                | 100       |            | 300       |
| SD        | 25,500             | 1,800     | 2,700      | 21,000    |
| TN        | 6,800              | 2,100     | 1,900      | 2,800     |
| TX        | 7,400              | 900       | 700        | 5,800     |
| UT        | 3,300              | 300       | 400        | 2,600     |
| VT        | 100                | 100       | 0          | 0         |
| VA        | 4,700              | 400       | 1,000      | 3,300     |
| WA        | 2,200              | 100       | 200        | 1,900     |
| WV        | 1,500              | 300       | 300        | 900       |
| WI        | 1,600              | 600       | 400        | 600       |
| WY        | 6,200              | 100       | 300        | 5,800     |
| Mt & West | 134,100            | 10,200    | 12,200     | 111,700   |
| Midwest   | 50,800             | 16,800    | 11,500     | 22,500    |
| So & East | 35,100             | 9,300     | 7,600      | 18,200    |
| US        | 220,000            | 36,300    | 31,300     | 152,400   |

<sup>1/</sup> Totals may not add due to rounding.



Losses of Dairy Calves from Digestive Problems, by Size Group,  
State, Region and United States, 1991 <sup>1/</sup>

| State      | Digestive Problems |           |            |            |           |
|------------|--------------------|-----------|------------|------------|-----------|
|            | Dairy              |           |            |            |           |
|            | Total              | 1-29 Head | 30-49 Head | 50-99 Head | 100+ Head |
|            |                    |           | Head       |            |           |
| AL         | 2,300              | 0         |            | 300        | 2,000     |
| AZ         | 1,700              | 0         | 0          | 0          | 1,700     |
| AR         | 2,700              | 0         |            | 900        | 1,800     |
| CA         | 22,600             |           |            | 100        | 22,500    |
| CO         | 2,700              | 0         | 0          | 200        | 2,500     |
| CT         | 900                | 0         |            |            | 900       |
| DE         | 300                | 0         | 0          |            | 300       |
| FL         | 4,700              | 0         | 0          |            | 4,700     |
| GA         | 6,400              | 0         |            | 600        | 5,800     |
| HI         | 200                | 0         | 0          | 0          | 200       |
| ID         | 5,300              | 100       | 200        | 600        | 4,400     |
| IL         | 5,300              | 100       | 700        | 1,800      | 2,700     |
| IN         | 5,100              | 100       | 900        | 2,200      | 1,900     |
| IA         | 8,800              | 600       | 1,500      | 3,600      | 3,100     |
| KS         | 1,800              | 200       |            | 400        | 1,200     |
| KY         | 6,700              | 500       | 500        | 2,400      | 3,300     |
| LA         | 6,500              |           | 100        | 900        | 5,500     |
| ME         | 1,200              |           | 100        | 300        | 800       |
| MD         | 2,700              |           | 100        | 700        | 1,900     |
| MA         | 800                | 0         |            | 200        | 600       |
| MI         | 17,600             | 200       | 1,600      | 5,000      | 10,800    |
| MN         | 27,800             | 1,200     | 6,400      | 9,500      | 10,700    |
| MS         | 2,100              |           | 100        | 300        | 1,700     |
| MO         | 15,000             | 1,400     | 700        | 5,400      | 7,500     |
| MT         | 700                |           | 0          | 200        | 500       |
| NE         | 2,700              | 0         | 100        | 1,000      | 1,600     |
| NV         | 1,100              | 0         | 0          |            | 1,100     |
| NH         | 600                |           |            | 100        | 500       |
| NJ         | 900                |           |            | 200        | 700       |
| NM         | 1,600              |           | 0          |            | 1,600     |
| NY         | 29,600             | 400       | 1,100      | 5,800      | 22,300    |
| NC         | 5,300              | 0         | 100        | 800        | 4,400     |
| ND         | 3,500              |           | 300        | 1,100      | 2,100     |
| OH         | 10,100             | 500       | 700        | 2,500      | 6,400     |
| OK         | 7,800              |           | 100        | 800        | 6,900     |
| OR         | 3,200              | 0         | 100        | 100        | 3,000     |
| PA         | 19,600             | 800       | 3,300      | 6,100      | 9,400     |
| RI         |                    | 0         |            |            |           |
| SC         | 3,300              | 0         | 0          | 200        | 3,100     |
| SD         | 4,400              | 200       | 1,000      | 700        | 2,500     |
| TN         | 13,100             | 200       | 200        | 2,100      | 10,600    |
| TX         | 20,500             | 0         | 0          | 600        | 19,900    |
| UT         | 3,300              |           | 100        | 600        | 2,600     |
| VT         | 5,100              | 100       | 200        | 2,000      | 2,800     |
| VA         | 6,200              |           | 200        | 700        | 5,300     |
| WA         | 8,000              |           |            | 400        | 7,600     |
| WV         | 2,800              |           | 0          | 500        | 2,300     |
| WI         | 47,000             | 1,900     | 7,900      | 18,200     | 19,000    |
| WY         | 200                | 100       |            | 100        |           |
| Mt. & West | 91,300             | 600       | 1,900      | 6,900      | 81,900    |
| Midwest    | 139,400            | 6,000     | 20,400     | 49,100     | 63,900    |
| So & East  | 121,100            | 2,000     | 6,000      | 24,200     | 88,900    |
| US         | 351,800            | 8,600     | 28,300     | 80,200     | 234,700   |

<sup>1/</sup> Totals may not add due to rounding.

Losses of Cattle from Respiratory Problems, by Class and Total,  
by State, Region and United States, 1991

| State     | Respiratory Problems |                |                 |       |         |
|-----------|----------------------|----------------|-----------------|-------|---------|
|           | Total<br>Cattle      | Beef<br>Cattle | Dairy<br>Cattle | Mixed | Other   |
|           | Head                 |                |                 |       |         |
| AL        | 5,500                | 1,000          | 400             | 100   | 4,000   |
| AZ        | 5,500                | 1,500          | 2,100           | 0     | 1,900   |
| AR        | 6,700                | 3,100          | 1,300           | 100   | 2,200   |
| CA        | 17,900               | 3,500          | 6,100           | 100   | 8,200   |
| CO        | 27,100               | 6,200          | 400             | 300   | 20,200  |
| CT        | 300                  |                | 300             | 0     |         |
| DE        | 1/                   | 0              |                 | 0     |         |
| FL        | 700                  | 200            | 400             | 100   | 0       |
| GA        | 3,800                | 1,400          | 1,600           | 100   | 700     |
| HI        | 200                  | 100            | 100             | 0     |         |
| ID        | 3,800                | 900            | 600             | 100   | 2,200   |
| IL        | 11,300               | 3,900          | 400             | 100   | 6,900   |
| IN        | 2,100                | 200            | 400             |       | 1,500   |
| IA        | 25,500               | 5,400          | 1,000           | 300   | 18,800  |
| KS        | 34,700               | 2,200          | 100             |       | 32,400  |
| KY        | 6,500                | 2,500          | 700             | 200   | 3,100   |
| LA        | 2,700                | 900            | 1,300           | 500   |         |
| ME        | 500                  |                | 200             | 0     | 300     |
| MD        | 800                  | 200            | 500             | 100   | 0       |
| MA        | 100                  |                | 100             |       |         |
| MI        | 8,200                | 1,600          | 1,800           |       | 4,800   |
| MN        | 15,000               | 2,400          | 2,100           | 500   | 10,000  |
| MS        | 4,600                | 2,100          | 600             | 100   | 1,800   |
| MO        | 8,300                | 1,600          | 400             | 300   | 6,000   |
| MT        | 4,000                | 3,200          | 100             | 200   | 500     |
| NE        | 43,600               | 6,100          | 200             |       | 37,300  |
| NV        | 700                  | 200            |                 |       | 500     |
| NH        | 100                  | 0              | 100             | 0     | 0       |
| NJ        | 100                  |                | 100             | 0     |         |
| NM        | 4,700                | 800            | 800             | 0     | 3,100   |
| NY        | 6,000                | 100            | 5,200           | 200   | 500     |
| NC        | 2,000                | 800            | 1,000           |       | 200     |
| ND        | 4,100                | 1,600          | 1,300           | 200   | 1,000   |
| OH        | 4,900                | 600            | 1,200           | 100   | 3,000   |
| OK        | 16,300               | 1,900          | 200             | 100   | 14,100  |
| OR        | 3,500                | 2,000          | 1,100           |       | 400     |
| PA        | 2,500                | 300            | 1,400           | 100   | 700     |
| RI        | 1/                   | 0              |                 | 0     | 0       |
| SC        | 2,000                | 300            | 700             | 100   | 900     |
| SD        | 16,500               | 4,600          | 600             | 200   | 11,100  |
| TN        | 4,400                | 1,900          | 900             | 300   | 1,300   |
| TX        | 70,000               | 2,000          | 600             | 200   | 67,200  |
| UT        | 1,800                | 700            | 400             | 200   | 500     |
| VT        | 1,200                | 100            | 1,000           | 100   | 0       |
| VA        | 5,800                | 3,200          | 900             | 700   | 1,000   |
| WA        | 6,300                | 800            | 300             |       | 5,200   |
| WV        | 800                  | 300            | 200             | 100   | 200     |
| WI        | 13,500               | 400            | 8,700           | 600   | 3,800   |
| WY        | 3,100                | 1,800          |                 |       | 1,300   |
| Mt & West | 263,800              | 40,100         | 15,000          | 1,600 | 207,100 |
| Midwest   | 95,500               | 19,200         | 17,300          | 2,000 | 57,000  |
| So & East | 50,500               | 15,300         | 17,600          | 2,800 | 14,800  |
| US        | 409,800              | 74,600         | 49,900          | 6,400 | 278,900 |

1/ Less than 100 head for the State, but number is included in U.S. total.  
Totals may not add due to rounding.

Losses of Beef Cattle from Respiratory Problems, by Size Group,  
State, Region and United States, 1991 <sup>1/</sup>

| State      | Respiratory Problems |           |            |           |
|------------|----------------------|-----------|------------|-----------|
|            | Beef                 |           |            |           |
|            | Total                | 1-49 Head | 50-99 Head | 100+ Head |
|            | Head                 |           |            |           |
| AL         | 1,000                | 100       | 100        | 800       |
| AZ         | 1,500                | 0         |            | 1,500     |
| AR         | 3,100                | 700       | 600        | 1,800     |
| CA         | 3,500                | 800       | 300        | 2,400     |
| CO         | 6,200                | 500       | 100        | 5,600     |
| CT         |                      |           | 0          | 0         |
| DE         | 0                    | 0         | 0          | 0         |
| FL         | 200                  |           |            | 200       |
| GA         | 1,400                | 300       | 400        | 700       |
| HI         | 100                  |           |            | 100       |
| ID         | 900                  | 100       |            | 800       |
| IL         | 3,900                | 1,400     | 1,700      | 800       |
| IN         | 200                  | 100       |            | 100       |
| IA         | 5,400                | 1,700     | 1,800      | 1,900     |
| KS         | 2,200                | 700       | 300        | 1,200     |
| KY         | 2,500                | 900       | 300        | 1,300     |
| LA         | 900                  | 200       | 300        | 400       |
| ME         |                      |           | 0          |           |
| MD         | 200                  | 100       | 0          | 100       |
| MA         |                      |           | 0          | 0         |
| MI         | 1,600                | 400       | 200        | 1,000     |
| MN         | 2,400                | 1,000     | 600        | 800       |
| MS         | 2,100                | 500       | 300        | 1,300     |
| MO         | 1,600                | 400       | 700        | 500       |
| MT         | 3,200                | 100       | 200        | 2,900     |
| NE         | 6,100                | 400       | 300        | 5,400     |
| NV         | 200                  |           |            | 200       |
| NH         | 0                    | 0         | 0          | 0         |
| NJ         |                      |           | 0          | 0         |
| NM         | 800                  | 100       |            | 700       |
| NY         | 100                  | 100       | 0          |           |
| NC         | 800                  | 500       | 100        | 200       |
| ND         | 1,600                | 200       | 400        | 1,000     |
| OH         | 600                  | 300       | 100        | 200       |
| OK         | 1,900                | 400       | 300        | 1,200     |
| OR         | 2,000                | 100       | 100        | 1,800     |
| PA         | 300                  | 300       |            | 0         |
| RI         | 0                    | 0         | 0          | 0         |
| SC         | 300                  |           | 100        | 200       |
| SD         | 4,600                | 500       | 700        | 3,400     |
| TN         | 1,900                | 300       | 500        | 1,100     |
| TX         | 2,000                | 100       | 400        | 1,500     |
| UT         | 700                  | 100       | 100        | 500       |
| VT         | 100                  | 100       | 0          | 0         |
| VA         | 3,200                | 300       |            | 2,900     |
| WA         | 800                  |           |            | 800       |
| WV         | 300                  | 100       | 100        | 100       |
| WI         | 400                  | 300       | 0          | 100       |
| WY         | 1,800                | 100       | 100        | 1,600     |
| Mt. & West | 40,100               | 4,200     | 3,300      | 32,600    |
| Midwest    | 19,200               | 6,300     | 5,700      | 7,200     |
| So & East  | 15,300               | 3,800     | 2,200      | 9,300     |
| US         | 74,600               | 14,300    | 11,200     | 49,100    |

<sup>1/</sup> Totals may not add due to rounding.

Losses of Dairy Cattle from Respiratory Problems, by Size Group,  
State, Region and United States, 1991 <sup>1/</sup>

| State     | Respiratory Problems |           |            |            |           |
|-----------|----------------------|-----------|------------|------------|-----------|
|           | Dairy                |           |            |            |           |
|           | Total                | 1-29 Head | 30-49 Head | 50-99 Head | 100+ Head |
|           |                      |           | Head       |            |           |
| AL        | 400                  |           | 0          | 100        | 300       |
| AZ        | 2,100                | 0         | 0          | 0          | 2,100     |
| AR        | 1,300                | 0         | 0          | 300        | 1,000     |
| CA        | 6,100                |           | 0          |            | 6,100     |
| CO        | 400                  | 0         |            |            | 400       |
| CT        | 300                  | 0         |            |            | 300       |
| DE        |                      | 0         | 0          | 0          |           |
| FL        | 400                  | 0         | 0          |            | 400       |
| GA        | 1,600                | 0         | 0          |            | 1,600     |
| HI        | 100                  | 0         | 0          | 0          | 100       |
| ID        | 600                  | 0         |            | 0          | 600       |
| IL        | 400                  |           | 100        | 100        | 200       |
| IN        | 400                  | 0         | 0          | 100        | 300       |
| IA        | 1,000                | 100       | 200        | 300        | 400       |
| KS        | 100                  |           |            |            | 100       |
| KY        | 700                  |           | 100        | 100        | 500       |
| LA        | 1,300                | 0         |            | 300        | 1,000     |
| ME        | 200                  | 0         |            |            | 200       |
| MD        | 500                  | 0         | 0          | 100        | 400       |
| MA        | 100                  | 0         | 0          |            | 100       |
| MI        | 1,800                | 100       |            | 400        | 1,300     |
| MN        | 2,100                | 100       | 600        | 800        | 600       |
| MS        | 600                  | 0         | 0          | 200        | 400       |
| MO        | 400                  | 0         |            | 200        | 200       |
| MT        | 100                  |           | 0          |            | 100       |
| NE        | 200                  |           |            | 100        | 100       |
| NV        |                      | 0         | 0          | 0          |           |
| NH        | 100                  |           |            |            | 100       |
| NJ        | 100                  |           |            |            | 100       |
| NM        | 800                  |           | 0          | 0          | 800       |
| NY        | 5,200                |           | 300        | 600        | 4,300     |
| NC        | 1,000                | 0         |            | 400        | 600       |
| ND        | 1,300                | 0         | 100        | 100        | 1,100     |
| OH        | 1,200                | 100       | 100        | 300        | 700       |
| OK        | 200                  |           | 0          |            | 200       |
| OR        | 1,100                |           | 0          |            | 1,100     |
| PA        | 1,400                | 200       | 200        | 400        | 600       |
| RI        |                      | 0         | 0          |            |           |
| SC        | 700                  | 0         | 0          | 100        | 600       |
| SD        | 600                  |           |            | 100        | 500       |
| TN        | 900                  |           | 0          |            | 900       |
| TX        | 600                  | 0         |            |            | 600       |
| UT        | 400                  | 0         |            | 100        | 300       |
| VT        | 1,000                | 0         | 300        | 200        | 500       |
| VA        | 900                  | 0         | 100        | 100        | 700       |
| WA        | 300                  |           | 0          |            | 300       |
| WV        | 200                  | 0         | 0          |            | 200       |
| WI        | 8,700                | 200       | 700        | 2,700      | 5,100     |
| WY        |                      | 0         |            |            |           |
| Mt & West | 15,000               | 0         | 100        | 400        | 14,500    |
| Midwest   | 17,300               | 600       | 1,700      | 5,200      | 9,800     |
| So & East | 17,600               | 200       | 1,000      | 2,600      | 13,800    |
| US        | 49,900               | 800       | 2,800      | 8,200      | 38,100    |

<sup>1/</sup> Totals may not add due to rounding.

Losses of Calves from Respiratory Problems, by Class and Total,  
by State, Region and United States, 1991

| State     | Respiratory Problems |             |              |        |         |
|-----------|----------------------|-------------|--------------|--------|---------|
|           | Total Calves         | Beef Calves | Dairy Calves | Mixed  | Other   |
|           | Head                 |             |              |        |         |
| AL        | 9,000                | 3,200       | 2,400        | 500    | 2,900   |
| AZ        | 16,000               | 800         | 2,100        |        | 13,100  |
| AR        | 24,100               | 4,500       | 3,700        | 300    | 15,600  |
| CA        | 50,400               | 8,200       | 30,700       | 800    | 10,700  |
| CO        | 20,400               | 11,200      | 3,300        | 900    | 5,000   |
| CT        | 400                  |             | 400          |        |         |
| DE        | 100                  | 0           | 100          |        | 0       |
| FL        | 5,200                | 1,800       | 3,200        | 200    | 0       |
| GA        | 10,700               | 4,000       | 4,300        | 1,200  | 1,200   |
| HI        | 500                  | 100         | 400          |        |         |
| ID        | 12,700               | 5,900       | 4,900        | 500    | 1,400   |
| IL        | 18,800               | 8,200       | 4,100        | 800    | 5,700   |
| IN        | 13,500               | 1,600       | 4,100        | 200    | 7,600   |
| IA        | 49,900               | 19,400      | 12,400       | 4,000  | 14,100  |
| KS        | 40,600               | 12,000      | 2,300        | 1,200  | 25,100  |
| KY        | 19,000               | 8,100       | 7,000        | 2,300  | 1,600   |
| LA        | 8,800                | 2,800       | 5,400        | 500    | 100     |
| ME        | 1,000                | 100         | 800          |        | 100     |
| MD        | 1,900                | 400         | 1,300        | 200    |         |
| MA        | 400                  |             | 400          | 0      | 0       |
| MI        | 19,500               | 1,800       | 14,000       | 300    | 3,400   |
| MN        | 45,700               | 8,500       | 22,800       | 2,700  | 11,700  |
| MS        | 21,500               | 12,800      | 2,400        | 300    | 6,000   |
| MO        | 38,800               | 17,100      | 10,500       | 7,900  | 3,300   |
| MT        | 9,500                | 8,600       | 500          | 400    |         |
| NE        | 30,900               | 22,100      | 2,800        | 1,700  | 4,300   |
| NV        | 1,600                | 1,200       | 200          | 100    | 100     |
| NH        | 700                  |             | 600          | 100    |         |
| NJ        | 600                  | 100         | 500          | 0      | 0       |
| NM        | 11,300               | 1,200       | 2,800        | 0      | 7,300   |
| NY        | 26,000               | 1,300       | 21,700       | 1,200  | 1,800   |
| NC        | 9,700                | 2,400       | 5,600        | 1,300  | 400     |
| ND        | 12,600               | 6,800       | 3,100        | 1,800  | 900     |
| OH        | 17,400               | 2,300       | 8,500        | 300    | 6,300   |
| OK        | 56,800               | 28,300      | 6,300        | 2,000  | 20,200  |
| OR        | 14,900               | 8,000       | 4,500        | 2,200  | 200     |
| PA        | 18,800               | 500         | 14,000       | 800    | 3,500   |
| RI        | 1/                   |             |              | 0      | 0       |
| SC        | 5,600                | 1,400       | 3,700        | 400    | 100     |
| SD        | 31,300               | 20,900      | 5,400        | 2,400  | 2,600   |
| TN        | 24,800               | 9,900       | 8,900        | 3,800  | 2,200   |
| TX        | 127,000              | 26,700      | 23,900       | 3,400  | 73,000  |
| UT        | 6,100                | 2,200       | 2,800        | 1,000  | 100     |
| VT        | 6,800                | 400         | 6,100        | 300    | 0       |
| VA        | 21,900               | 6,600       | 8,500        | 5,400  | 1,400   |
| WA        | 8,900                | 1,800       | 6,200        | 200    | 700     |
| WV        | 4,100                | 1,700       | 1,800        | 600    | 0       |
| WI        | 67,200               | 1,300       | 35,900       | 2,500  | 27,500  |
| WY        | 5,000                | 4,400       | 200          | 200    | 200     |
| Mt & West | 456,500              | 170,400     | 102,400      | 18,800 | 164,900 |
| Midwest   | 294,900              | 64,700      | 116,000      | 19,000 | 95,200  |
| So & East | 197,000              | 57,500      | 99,100       | 19,100 | 21,300  |
| US        | 948,400              | 292,600     | 317,500      | 56,900 | 281,400 |

1/ Less than 100 head for the State, but number is included in U.S. total.  
Totals may not add due to rounding.

Losses of Beef Calves from Respiratory Problems, by Size Group,  
State, Region and United States, 1991 <sup>1/</sup>

| State     | Respiratory Problems |           |            |           |
|-----------|----------------------|-----------|------------|-----------|
|           | Beef                 |           |            |           |
|           | Total                | 1-49 Head | 50-99 Head | 100+ Head |
|           | Head                 |           |            |           |
| AL        | 3,200                | 500       | 400        | 2,300     |
| AZ        | 800                  |           |            | 800       |
| AR        | 4,500                | 700       | 800        | 3,000     |
| CA        | 8,200                | 500       | 1,200      | 6,500     |
| CO        | 11,200               | 1,000     | 600        | 9,600     |
| CT        |                      |           | 0          | 0         |
| DE        | 0                    | 0         | 0          | 0         |
| FL        | 1,800                | 100       |            | 1,700     |
| GA        | 4,000                | 900       | 400        | 2,700     |
| HI        | 100                  | 0         |            | 100       |
| ID        | 5,900                | 600       | 300        | 5,000     |
| IL        | 8,200                | 3,900     | 2,300      | 2,000     |
| IN        | 1,600                | 700       | 100        | 800       |
| IA        | 19,400               | 6,200     | 5,700      | 7,500     |
| KS        | 12,000               | 3,800     | 2,000      | 6,200     |
| KY        | 8,100                | 3,400     | 1,900      | 2,800     |
| LA        | 2,800                | 300       | 200        | 2,300     |
| ME        | 100                  | 100       | 0          |           |
| MD        | 400                  | 100       | 100        | 200       |
| MA        |                      |           |            | 0         |
| MI        | 1,800                | 800       | 700        | 300       |
| MN        | 8,500                | 4,100     | 2,400      | 2,000     |
| MS        | 12,800               | 300       | 1,000      | 11,500    |
| MO        | 17,100               | 2,900     | 5,200      | 9,000     |
| MT        | 8,600                | 200       | 500        | 7,900     |
| NE        | 22,100               | 2,200     | 1,600      | 18,300    |
| NV        | 1,200                |           |            | 1,200     |
| NH        |                      |           | 0          | 0         |
| NJ        | 100                  | 100       | 0          |           |
| NM        | 1,200                | 100       | 100        | 1,000     |
| NY        | 1,300                | 800       | 400        | 100       |
| NC        | 2,400                | 1,200     | 400        | 800       |
| ND        | 6,800                | 700       | 1,000      | 5,100     |
| OH        | 2,300                | 900       | 400        | 1,000     |
| OK        | 28,300               | 7,000     | 5,400      | 15,900    |
| OR        | 8,000                | 500       | 500        | 7,000     |
| PA        | 500                  | 400       | 100        |           |
| RI        |                      |           | 0          | 0         |
| SC        | 1,400                | 200       | 200        | 1,000     |
| SD        | 20,900               | 2,600     | 3,000      | 15,300    |
| TN        | 9,900                | 2,800     | 2,300      | 4,800     |
| TX        | 26,700               | 1,700     | 2,700      | 22,300    |
| UT        | 2,200                | 300       | 200        | 1,700     |
| VT        | 400                  | 300       | 100        | 0         |
| VA        | 6,600                | 1,000     | 1,300      | 4,300     |
| WA        | 1,800                | 100       | 100        | 1,600     |
| WV        | 1,700                | 200       | 300        | 1,200     |
| WI        | 1,300                | 1,000     | 100        | 200       |
| WY        | 4,400                | 100       | 200        | 4,100     |
| Mt & West | 170,400              | 21,400    | 19,400     | 129,600   |
| Midwest   | 64,700               | 21,200    | 17,700     | 25,800    |
| So & East | 57,500               | 12,700    | 9,100      | 35,700    |
| US        | 292,600              | 55,300    | 46,200     | 191,100   |

<sup>1/</sup> Totals may not add due to rounding.

Losses of Dairy Calves from Respiratory Problems, by Size Group,  
State, Region and United States, 1991 <sup>1/</sup>

| State     | Respiratory Problems |           |            |            |           |
|-----------|----------------------|-----------|------------|------------|-----------|
|           | Dairy                |           |            |            |           |
|           | Total                | 1-29 Head | 30-49 Head | 50-99 Head | 100+ Head |
|           | Head                 |           |            |            |           |
| AL        | 2,400                | 200       |            | 300        | 1,900     |
| AZ        | 2,100                | 0         | 0          | 0          | 2,100     |
| AR        | 3,700                | 0         |            | 1,600      | 2,100     |
| CA        | 30,700               |           |            | 100        | 30,600    |
| CO        | 3,300                | 0         | 0          | 100        | 3,200     |
| CT        | 400                  |           |            |            | 400       |
| DE        | 100                  | 0         | 0          |            | 100       |
| FL        | 3,200                | 0         | 0          |            | 3,200     |
| GA        | 4,300                | 0         |            | 300        | 4,000     |
| HI        | 400                  | 0         | 0          | 0          | 400       |
| ID        | 4,900                | 100       | 100        | 400        | 4,300     |
| IL        | 4,100                | 100       | 600        | 1,100      | 2,300     |
| IN        | 4,100                | 300       | 300        | 1,500      | 2,000     |
| IA        | 12,400               | 1,300     | 2,500      | 4,400      | 4,200     |
| KS        | 2,300                | 100       | 200        | 500        | 1,500     |
| KY        | 7,000                | 400       | 800        | 1,700      | 4,100     |
| LA        | 5,400                |           | 100        | 900        | 4,400     |
| ME        | 800                  |           | 100        | 200        | 500       |
| MD        | 1,300                |           | 100        | 400        | 800       |
| MA        | 400                  |           |            | 100        | 300       |
| MI        | 14,000               | 400       | 500        | 4,100      | 9,000     |
| MN        | 22,800               | 1,100     | 5,600      | 7,800      | 8,300     |
| MS        | 2,400                |           |            | 700        | 1,700     |
| MO        | 10,500               | 300       | 300        | 4,400      | 5,500     |
| MT        | 500                  |           | 0          | 200        | 300       |
| NE        | 2,800                |           | 300        | 400        | 2,100     |
| NV        | 200                  |           | 0          |            | 200       |
| NH        | 600                  |           |            | 100        | 500       |
| NJ        | 500                  |           |            | 100        | 400       |
| NM        | 2,800                | 500       | 0          |            | 2,300     |
| NY        | 21,700               | 500       | 900        | 4,700      | 15,600    |
| NC        | 5,600                | 0         | 100        | 800        | 4,700     |
| ND        | 3,100                | 100       | 400        | 800        | 1,800     |
| OH        | 8,500                | 300       | 1,000      | 2,200      | 5,000     |
| OK        | 6,300                | 100       | 100        | 800        | 5,300     |
| OR        | 4,500                |           | 100        | 400        | 4,000     |
| PA        | 14,000               | 700       | 2,400      | 3,500      | 7,400     |
| RI        |                      |           |            |            |           |
| SC        | 3,700                |           | 0          | 400        | 3,300     |
| SD        | 5,400                | 600       | 600        | 800        | 3,400     |
| TN        | 8,900                |           | 500        | 2,500      | 5,900     |
| TX        | 23,900               | 0         | 100        | 600        | 23,200    |
| UT        | 2,800                |           | 100        | 500        | 2,200     |
| VT        | 6,100                | 100       | 700        | 1,300      | 4,000     |
| VA        | 8,500                | 100       | 300        | 2,100      | 6,000     |
| WA        | 6,200                |           |            | 300        | 5,900     |
| WV        | 1,800                |           | 0          | 300        | 1,500     |
| WI        | 35,900               | 1,600     | 4,000      | 12,000     | 18,300    |
| WY        | 200                  | 100       |            |            | 100       |
| Mt & West | 102,400              | 1,600     | 2,000      | 5,900      | 92,900    |
| Midwest   | 116,000              | 5,400     | 14,800     | 39,100     | 56,700    |
| So & East | 99,100               | 2,000     | 6,000      | 20,400     | 70,700    |
| US        | 317,500              | 9,000     | 22,800     | 65,400     | 220,300   |

<sup>1/</sup> Totals may not add due to rounding.

Losses of Cattle from Calving Problems, by Class and Total,  
by State, Region and United States, 1991

| State     | Calving Problems |                |                 |        |       |
|-----------|------------------|----------------|-----------------|--------|-------|
|           | Total<br>Cattle  | Beef<br>Cattle | Dairy<br>Cattle | Mixed  | Other |
|           | Head             |                |                 |        |       |
| AL        | 6,000            | 4,300          | 1,400           | 300    |       |
| AZ        | 2,800            | 1,700          | 1,100           | 0      |       |
| AR        | 8,400            | 4,200          | 3,400           | 800    |       |
| CA        | 11,600           | 3,800          | 7,400           | 300    | 100   |
| CO        | 3,100            | 1,500          | 900             | 100    | 600   |
| CT        | 600              |                | 600             |        | 0     |
| DE        | 200              |                | 200             | 0      | 0     |
| FL        | 5,700            | 2,000          | 2,300           | 1,400  | 0     |
| GA        | 7,900            | 4,100          | 3,100           | 700    | 0     |
| HI        | 400              | 300            | 100             |        |       |
| ID        | 1,700            | 700            | 900             |        | 100   |
| IL        | 2,400            | 1,500          | 600             | 100    | 200   |
| IN        | 2,600            | 1,100          | 1,100           | 0      | 400   |
| IA        | 5,600            | 2,500          | 2,300           | 300    | 500   |
| KS        | 3,900            | 1,900          | 700             | 200    | 1,100 |
| KY        | 10,500           | 6,000          | 3,200           | 1,200  | 100   |
| LA        | 4,900            | 1,700          | 2,700           | 500    |       |
| ME        | 400              |                | 300             | 100    | 0     |
| MD        | 1,300            | 400            | 800             | 100    |       |
| MA        | 200              |                | 200             |        |       |
| MI        | 4,900            | 400            | 4,400           |        | 100   |
| MN        | 7,400            | 1,200          | 5,700           | 400    | 100   |
| MS        | 6,500            | 4,000          | 1,900           | 300    | 300   |
| MO        | 18,400           | 9,600          | 5,400           | 2,900  | 500   |
| MT        | 3,000            | 2,600          | 100             | 200    | 100   |
| NE        | 7,500            | 3,900          | 500             | 100    | 3,000 |
| NV        | 400              | 300            | 100             | 0      | 0     |
| NH        | 300              |                | 300             | 0      |       |
| NJ        | 400              |                | 400             |        | 0     |
| NM        | 1,800            | 1,000          | 700             | 100    |       |
| NY        | 8,800            | 100            | 7,900           | 600    | 200   |
| NC        | 4,600            | 2,100          | 2,200           | 300    |       |
| ND        | 1,500            | 800            | 400             | 300    | 0     |
| OH        | 5,700            | 1,000          | 4,500           | 200    | 0     |
| OK        | 13,900           | 8,800          | 3,800           | 1,200  | 100   |
| OR        | 2,900            | 1,800          | 900             | 200    |       |
| PA        | 5,900            | 400            | 5,100           | 400    |       |
| RI        | 1/               |                |                 |        | 0     |
| SC        | 3,700            | 1,400          | 1,900           | 400    |       |
| SD        | 5,200            | 3,700          | 900             | 400    | 200   |
| TN        | 11,100           | 5,500          | 4,500           | 1,000  | 100   |
| TX        | 29,400           | 16,900         | 10,100          | 2,200  | 200   |
| UT        | 1,400            | 700            | 600             | 100    |       |
| VT        | 2,500            |                | 2,400           | 100    | 0     |
| VA        | 5,100            | 2,000          | 2,100           | 1,000  | 0     |
| WA        | 4,700            | 1,200          | 3,300           | 100    | 100   |
| WV        | 2,000            | 900            | 900             | 200    |       |
| WI        | 12,600           | 600            | 11,300          | 500    | 200   |
| WY        | 1,500            | 1,500          |                 |        | 0     |
| Mt & West | 96,700           | 53,100         | 32,500          | 5,500  | 5,600 |
| Midwest   | 68,000           | 22,100         | 38,700          | 5,200  | 2,000 |
| So & East | 88,600           | 34,900         | 44,400          | 8,600  | 700   |
| US        | 253,300          | 110,100        | 115,600         | 19,300 | 8,300 |

1/ Less than 100 head for the State, but number is included in U.S. total.  
Totals may not add due to rounding.



Losses of Beef Cattle from Calving Problems, by Size Group,  
State, Region and United States, 1991 <sup>1/</sup>

| State     | Calving Problems |           |            |           |
|-----------|------------------|-----------|------------|-----------|
|           | Beef             |           |            |           |
|           | Total            | 1-49 Head | 50-99 Head | 100+ Head |
|           | Head             |           |            |           |
| AL        | 4,300            | 800       | 900        | 2,600     |
| AZ        | 1,700            |           |            | 1,700     |
| AR        | 4,200            | 1,500     | 1,300      | 1,400     |
| CA        | 3,800            | 200       | 100        | 3,500     |
| CO        | 1,500            | 100       | 200        | 1,200     |
| CT        |                  |           | 0          | 0         |
| DE        |                  |           |            | 0         |
| FL        | 2,000            | 100       | 100        | 1,800     |
| GA        | 4,100            | 1,700     | 800        | 1,600     |
| HI        | 300              |           |            | 300       |
| ID        | 700              |           | 100        | 600       |
| IL        | 1,500            | 700       | 300        | 500       |
| IN        | 1,100            | 400       | 100        | 600       |
| IA        | 2,500            | 1,200     | 500        | 800       |
| KS        | 1,900            | 500       | 300        | 1,100     |
| KY        | 6,000            | 2,500     | 1,700      | 1,800     |
| LA        | 1,700            | 400       | 300        | 1,000     |
| ME        |                  |           | 0          | 0         |
| MD        | 400              | 100       | 100        | 200       |
| MA        |                  |           |            | 0         |
| MI        | 400              | 300       | 100        |           |
| MN        | 1,200            | 600       | 400        | 200       |
| MS        | 4,000            | 700       | 600        | 2,700     |
| MO        | 9,600            | 3,100     | 1,700      | 4,800     |
| MT        | 2,600            | 100       | 100        | 2,400     |
| NE        | 3,900            | 400       | 200        | 3,300     |
| NV        | 300              |           |            | 300       |
| NH        |                  |           | 0          | 0         |
| NJ        |                  |           |            | 0         |
| NM        | 1,000            | 100       | 100        | 800       |
| NY        | 100              | 100       |            | 0         |
| NC        | 2,100            | 800       | 500        | 800       |
| ND        | 800              | 200       | 300        | 300       |
| OH        | 1,000            | 500       | 100        | 400       |
| OK        | 8,800            | 2,300     | 1,700      | 4,800     |
| OR        | 1,800            | 200       | 100        | 1,500     |
| PA        | 400              | 300       | 100        | 0         |
| RI        |                  |           | 0          | 0         |
| SC        | 1,400            | 300       | 400        | 700       |
| SD        | 3,700            | 400       | 400        | 2,900     |
| TN        | 5,500            | 2,000     | 1,400      | 2,100     |
| TX        | 16,900           | 1,500     | 1,900      | 13,500    |
| UT        | 700              | 100       | 100        | 500       |
| VT        |                  |           | 0          | 0         |
| VA        | 2,000            | 500       | 300        | 1,200     |
| WA        | 1,200            | 100       | 100        | 1,000     |
| WV        | 900              | 400       | 400        | 100       |
| WI        | 600              | 400       | 100        | 100       |
| WY        | 1,500            | 100       | 100        | 1,300     |
| Mt & West | 53,100           | 6,300     | 5,800      | 41,000    |
| Midwest   | 22,100           | 8,700     | 4,600      | 8,800     |
| So & East | 34,900           | 10,700    | 7,600      | 16,600    |
| US        | 110,100          | 25,700    | 18,000     | 66,400    |

<sup>1/</sup> Totals may not add due to rounding.

Losses of Dairy Cattle from Calving Problems, by Size Group,  
State, Region and United States, 1991 <sup>1/</sup>

| State     | Calving Problems |           |            |            |           |
|-----------|------------------|-----------|------------|------------|-----------|
|           | Dairy            |           |            |            |           |
|           | Total            | 1-29 Head | 30-49 Head | 50-99 Head | 100+ Head |
|           | Head             |           |            |            |           |
| AL        | 1,400            | 0         |            | 100        | 1,300     |
| AZ        | 1,100            | 0         | 0          | 0          | 1,100     |
| AR        | 3,400            |           | 100        | 1,300      | 2,000     |
| CA        | 7,400            | 0         |            | 100        | 7,300     |
| CO        | 900              | 0         |            | 100        | 800       |
| CT        | 600              | 100       |            |            | 500       |
| DE        | 200              | 0         | 0          | 0          | 200       |
| FL        | 2,300            | 0         | 0          |            | 2,300     |
| GA        | 3,100            | 0         | 0          | 400        | 2,700     |
| HI        | 100              | 0         | 0          | 0          | 100       |
| ID        | 900              |           |            | 100        | 800       |
| IL        | 600              | 100       |            | 200        | 300       |
| IN        | 1,100            | 100       | 100        | 400        | 500       |
| IA        | 2,300            | 100       | 300        | 700        | 1,200     |
| KS        | 700              | 100       |            | 200        | 400       |
| KY        | 3,200            | 200       | 400        | 1,300      | 1,300     |
| LA        | 2,700            |           |            | 600        | 2,100     |
| ME        | 300              |           | 100        | 100        | 100       |
| MD        | 800              |           | 100        | 100        | 600       |
| MA        | 200              | 0         |            |            | 200       |
| MI        | 4,400            | 200       | 300        | 1,000      | 2,900     |
| MN        | 5,700            | 400       | 1,400      | 2,100      | 1,800     |
| MS        | 1,900            | 100       |            | 400        | 1,400     |
| MO        | 5,400            | 600       | 200        | 1,400      | 3,200     |
| MT        | 100              | 0         | 0          |            | 100       |
| NE        | 500              | 0         | 100        | 100        | 300       |
| NV        | 100              | 0         | 0          | 0          | 100       |
| NH        | 300              |           | 100        | 100        | 100       |
| NJ        | 400              | 0         |            | 100        | 300       |
| NM        | 700              | 0         | 0          | 0          | 700       |
| NY        | 7,900            | 100       | 400        | 2,400      | 5,000     |
| NC        | 2,200            | 0         | 100        | 200        | 1,900     |
| ND        | 400              |           | 100        | 100        | 200       |
| OH        | 4,500            | 200       | 600        | 1,600      | 2,100     |
| OK        | 3,800            | 200       |            | 600        | 3,000     |
| OR        | 900              | 0         | 0          | 100        | 800       |
| PA        | 5,100            | 200       | 800        | 1,700      | 2,400     |
| RI        |                  |           |            |            |           |
| SC        | 1,900            | 0         | 0          | 200        | 1,700     |
| SD        | 900              | 100       | 100        | 200        | 500       |
| TN        | 4,500            | 100       | 200        | 1,100      | 3,100     |
| TX        | 10,100           | 100       |            | 600        | 9,400     |
| UT        | 600              | 0         |            | 200        | 400       |
| VT        | 2,400            | 0         | 200        | 500        | 1,700     |
| VA        | 2,100            |           | 100        | 300        | 1,700     |
| WA        | 3,300            |           | 0          | 200        | 3,100     |
| WV        | 900              | 0         |            | 300        | 600       |
| WI        | 11,300           | 700       | 2,100      | 3,400      | 5,100     |
| WY        |                  | 0         | 0          |            |           |
| Mt & West | 32,500           | 500       | 300        | 2,600      | 29,100    |
| Midwest   | 38,700           | 2,400     | 5,100      | 12,100     | 19,100    |
| So & East | 44,400           | 800       | 2,500      | 9,900      | 31,200    |
| US        | 115,600          | 3,700     | 7,900      | 24,600     | 79,400    |

<sup>1/</sup> Totals may not add due to rounding.

Losses of Calves from Calving Problems, by Class and Total,  
by State, Region and United States, 1991

| State     | Calving Problems |                |                 |        |       |
|-----------|------------------|----------------|-----------------|--------|-------|
|           | Total<br>Calves  | Beef<br>Calves | Dairy<br>Calves | Mixed  | Other |
|           |                  |                | Head            |        |       |
| AL        | 5,600            | 4,600          | 800             | 200    |       |
| AZ        | 500              | 200            | 300             | 0      |       |
| AR        | 5,800            | 4,100          | 1,400           | 300    |       |
| CA        | 11,600           | 4,500          | 6,900           | 200    |       |
| CO        | 8,200            | 5,800          | 2,300           |        | 100   |
| CT        | 200              |                | 200             | 0      |       |
| DE        | 200              |                | 200             | 0      | 0     |
| FL        | 5,100            | 3,700          | 1,300           | 100    | 0     |
| GA        | 6,800            | 3,600          | 2,400           | 800    | 0     |
| HI        | 600              | 500            | 100             |        | 0     |
| ID        | 6,700            | 4,800          | 1,600           | 200    | 100   |
| IL        | 9,500            | 7,800          | 1,400           | 200    | 100   |
| IN        | 4,200            | 2,500          | 1,600           |        | 100   |
| IA        | 22,500           | 16,900         | 4,200           | 1,100  | 300   |
| KS        | 7,000            | 5,600          | 800             | 400    | 200   |
| KY        | 13,000           | 8,700          | 3,200           | 1,000  | 100   |
| LA        | 3,600            | 2,000          | 1,000           | 600    | 0     |
| ME        | 600              | 100            | 500             |        | 0     |
| MD        | 1,200            | 400            | 600             | 200    |       |
| MA        | 200              |                | 200             | 0      | 0     |
| MI        | 6,300            | 1,200          | 5,000           | 100    |       |
| MN        | 10,000           | 5,100          | 3,700           | 1,100  | 100   |
| MS        | 5,100            | 3,400          | 1,400           | 100    | 200   |
| MO        | 20,500           | 16,100         | 2,900           | 1,300  | 200   |
| MT        | 13,400           | 12,300         | 200             | 700    | 200   |
| NE        | 17,000           | 16,300         | 300             | 200    | 200   |
| NV        | 700              | 600            | 100             |        | 0     |
| NH        | 400              |                | 300             | 100    | 0     |
| NJ        | 200              | 100            | 100             |        |       |
| NM        | 4,000            | 1,200          | 2,500           | 300    |       |
| NY        | 8,800            | 300            | 8,300           | 200    |       |
| NC        | 3,800            | 2,500          | 1,200           | 100    |       |
| ND        | 11,200           | 9,300          | 800             | 900    | 200   |
| OH        | 6,800            | 2,000          | 4,300           | 400    | 100   |
| OK        | 18,100           | 14,100         | 2,600           | 1,300  | 100   |
| OR        | 10,600           | 9,000          | 1,300           | 200    | 100   |
| PA        | 6,000            | 700            | 4,700           | 600    |       |
| RI        | 1/               |                |                 | 0      | 0     |
| SC        | 4,800            | 2,200          | 2,100           | 400    | 100   |
| SD        | 16,500           | 14,300         | 1,500           | 600    | 100   |
| TN        | 8,600            | 6,800          | 1,700           | 100    | 0     |
| TX        | 26,100           | 18,600         | 6,600           | 700    | 200   |
| UT        | 4,900            | 2,600          | 1,700           | 600    |       |
| VT        | 3,200            |                | 2,900           | 300    | 0     |
| VA        | 12,400           | 7,100          | 3,200           | 1,900  | 200   |
| WA        | 2,400            | 1,000          | 1,300           | 100    |       |
| WV        | 5,400            | 3,900          | 900             | 500    | 100   |
| WI        | 10,500           | 700            | 9,500           | 200    | 100   |
| WY        | 6,000            | 5,900          |                 | 100    |       |
| Mt & West | 165,500          | 126,600        | 30,900          | 6,500  | 1,500 |
| Midwest   | 96,100           | 56,400         | 34,000          | 4,700  | 1,000 |
| So & East | 95,200           | 50,100         | 37,200          | 7,200  | 700   |
| US        | 356,800          | 233,100        | 102,100         | 18,400 | 3,200 |

1/ Less than 100 head for the State, but number is included in U.S. total.  
Totals may not add due to rounding.

Losses of Beef Calves from Calving Problems, by Size Group,  
State, Region and United States, 1991 <sup>1/</sup>

| State     | Calving Problems |           |            |           |
|-----------|------------------|-----------|------------|-----------|
|           | Beef             |           |            |           |
|           | Total            | 1-49 Head | 50-99 Head | 100+ Head |
|           | Head             |           |            |           |
| AL        | 4,600            | 1,300     | 900        | 2,400     |
| AZ        | 200              |           |            | 200       |
| AR        | 4,100            | 1,600     | 800        | 1,700     |
| CA        | 4,500            | 200       | 100        | 4,200     |
| CO        | 5,800            | 500       | 600        | 4,700     |
| CT        |                  |           | 0          | 0         |
| DE        |                  |           |            | 0         |
| FL        | 3,700            | 200       | 200        | 3,300     |
| GA        | 3,600            | 1,100     | 700        | 1,800     |
| HI        | 500              |           | 100        | 400       |
| ID        | 4,800            | 300       | 600        | 3,900     |
| IL        | 7,800            | 3,700     | 1,800      | 2,300     |
| IN        | 2,500            | 1,100     | 400        | 1,000     |
| IA        | 16,900           | 6,000     | 4,200      | 6,700     |
| KS        | 5,600            | 1,200     | 1,200      | 3,200     |
| KY        | 8,700            | 4,200     | 3,200      | 1,300     |
| LA        | 2,000            | 400       | 700        | 900       |
| ME        | 100              | 100       | 0          | 0         |
| MD        | 400              | 200       | 100        | 100       |
| MA        |                  |           | 0          |           |
| MI        | 1,200            | 700       | 500        | 0         |
| MN        | 5,100            | 2,300     | 1,400      | 1,400     |
| MS        | 3,400            | 800       | 600        | 2,000     |
| MO        | 16,100           | 5,400     | 3,700      | 7,000     |
| MT        | 12,300           | 400       | 700        | 11,200    |
| NE        | 16,300           | 1,900     | 1,600      | 12,800    |
| NV        | 600              | 100       |            | 500       |
| NH        |                  |           | 0          | 0         |
| NJ        | 100              |           | 100        | 0         |
| NM        | 1,200            | 200       | 200        | 800       |
| NY        | 300              | 200       | 100        |           |
| NC        | 2,500            | 1,100     | 700        | 700       |
| ND        | 9,300            | 900       | 2,400      | 6,000     |
| OH        | 2,000            | 1,100     | 300        | 600       |
| OK        | 14,100           | 3,900     | 2,700      | 7,500     |
| OR        | 9,000            | 500       | 400        | 8,100     |
| PA        | 700              | 700       | 0          | 0         |
| RI        |                  |           | 0          | 0         |
| SC        | 2,200            | 900       | 700        | 600       |
| SD        | 14,300           | 1,900     | 2,400      | 10,000    |
| TN        | 6,800            | 3,400     | 1,400      | 2,000     |
| TX        | 18,600           | 1,700     | 1,900      | 15,000    |
| UT        | 2,600            | 200       | 300        | 2,100     |
| VT        |                  |           | 0          | 0         |
| VA        | 7,100            | 2,100     | 2,100      | 2,900     |
| WA        | 1,000            | 100       | 200        | 700       |
| WV        | 3,900            | 2,100     | 900        | 900       |
| WI        | 700              | 400       | 200        | 100       |
| WY        | 5,900            | 200       | 200        | 5,500     |
| Mt & West | 126,600          | 14,200    | 15,600     | 96,800    |
| Midwest   | 56,400           | 22,300    | 13,300     | 20,800    |
| So & East | 50,100           | 18,800    | 12,400     | 18,900    |
| US        | 233,100          | 55,300    | 41,300     | 136,500   |

<sup>1/</sup> Totals may not add due to rounding.

Losses of Dairy Calves from Calving Problems, by Size Group,  
State, Region and United States, 1991 <sup>1/</sup>

| State     | Calving Problems |           |            |            |           |
|-----------|------------------|-----------|------------|------------|-----------|
|           | Dairy            |           |            |            |           |
|           | Total            | 1-29 Head | 30-49 Head | 50-99 Head | 100+ Head |
|           | Head             |           |            |            |           |
| AL        | 800              | 0         |            | 200        | 600       |
| AZ        | 300              | 0         | 0          | 0          | 300       |
| AR        | 1,400            |           | 100        | 900        | 400       |
| CA        | 6,900            |           |            |            | 6,900     |
| CO        | 2,300            |           |            | 200        | 2,100     |
| CT        | 200              |           | 0          | 0          | 200       |
| DE        | 200              | 0         | 0          | 0          | 200       |
| FL        | 1,300            | 0         |            |            | 1,300     |
| GA        | 2,400            | 0         | 0          |            | 2,400     |
| HI        | 100              | 0         | 0          | 0          | 100       |
| ID        | 1,600            |           | 100        | 100        | 1,400     |
| IL        | 1,400            | 100       | 300        | 500        | 500       |
| IN        | 1,600            | 100       | 200        | 800        | 500       |
| IA        | 4,200            | 200       | 900        | 800        | 2,300     |
| KS        | 800              | 100       |            | 200        | 500       |
| KY        | 3,200            | 100       | 200        | 1,500      | 1,400     |
| LA        | 1,000            |           | 0          | 200        | 800       |
| ME        | 500              |           | 100        | 200        | 200       |
| MD        | 600              |           |            | 300        | 300       |
| MA        | 200              | 0         |            | 100        | 100       |
| MI        | 5,000            | 200       | 300        | 1,200      | 3,300     |
| MN        | 3,700            | 700       | 1,100      | 1,600      | 300       |
| MS        | 1,400            |           |            | 700        | 700       |
| MO        | 2,900            | 200       | 100        | 1,400      | 1,200     |
| MT        | 200              |           | 0          | 100        | 100       |
| NE        | 300              | 100       |            | 100        | 100       |
| NV        | 100              | 0         | 0          | 0          | 100       |
| NH        | 300              | 0         | 0          | 100        | 200       |
| NJ        | 100              | 0         |            |            | 100       |
| NM        | 2,500            | 0         | 0          | 0          | 2,500     |
| NY        | 8,300            | 100       | 600        | 1,700      | 5,900     |
| NC        | 1,200            | 0         | 0          | 400        | 800       |
| ND        | 800              |           | 100        | 400        | 300       |
| OH        | 4,300            | 300       | 200        | 1,400      | 2,400     |
| OK        | 2,600            | 100       | 200        | 900        | 1,400     |
| OR        | 1,300            | 0         |            | 100        | 1,200     |
| PA        | 4,700            | 400       | 1,000      | 1,000      | 2,300     |
| RI        |                  |           |            |            | 0         |
| SC        | 2,100            | 0         | 0          | 100        | 2,000     |
| SD        | 1,500            |           | 400        | 200        | 900       |
| TN        | 1,700            | 300       | 100        | 600        | 700       |
| TX        | 6,600            | 100       |            | 200        | 6,300     |
| UT        | 1,700            | 0         |            | 300        | 1,400     |
| VT        | 2,900            | 0         | 600        | 900        | 1,400     |
| VA        | 3,200            |           | 100        | 800        | 2,300     |
| WA        | 1,300            | 0         | 0          | 100        | 1,200     |
| WV        | 900              | 0         | 0          | 200        | 700       |
| WI        | 9,500            | 300       | 2,100      | 2,700      | 4,400     |
| WY        |                  | 0         | 0          | 0          |           |
| Mt & West | 30,900           | 400       | 800        | 2,900      | 26,800    |
| Midwest   | 34,000           | 2,100     | 5,300      | 11,300     | 15,300    |
| So & East | 37,200           | 900       | 2,700      | 9,000      | 24,600    |
| US        | 102,100          | 3,400     | 8,800      | 23,200     | 66,700    |

<sup>1/</sup> Totals may not add due to rounding.

Losses of Cattle from Weather, by Class and Total,  
by State, Region and United States, 1991

| State     | Weather         |                |                 |       |        |
|-----------|-----------------|----------------|-----------------|-------|--------|
|           | Total<br>Cattle | Beef<br>Cattle | Dairy<br>Cattle | Mixed | Other  |
|           | Head            |                |                 |       |        |
| AL        | 1,200           | 1,000          | 100             | 0     | 100    |
| AZ        | 3,200           | 2,900          | 200             | 100   |        |
| AR        | 2,600           | 1,200          | 600             | 700   | 100    |
| CA        | 2,400           | 600            | 1,700           | 0     | 100    |
| CO        | 2,500           | 1,400          | 100             | 100   | 900    |
| CT        | 0               | 0              | 0               | 0     | 0      |
| DE        | 0               | 0              | 0               | 0     | 0      |
| FL        | 3,600           | 2,000          | 1,600           |       | 0      |
| GA        | 1,200           | 800            | 100             | 200   | 100    |
| HI        | 400             | 400            |                 | 0     | 0      |
| ID        | 500             | 200            | 100             |       | 200    |
| IL        | 1,100           | 700            | 100             |       | 300    |
| IN        | 2,000           | 500            | 1,400           |       | 100    |
| IA        | 8,700           | 5,000          | 600             | 300   | 2,800  |
| KS        | 9,700           | 1,200          | 100             | 100   | 8,300  |
| KY        | 3,000           | 1,500          | 800             | 500   | 200    |
| LA        | 1,400           | 1,200          | 100             | 100   | 0      |
| ME        | 1/              | 0              |                 | 0     | 0      |
| MD        | 300             |                | 300             |       |        |
| MA        | 1/              |                |                 | 0     | 0      |
| MI        | 700             | 100            | 400             | 0     | 200    |
| MN        | 2,100           | 900            | 600             | 100   | 500    |
| MS        | 1,500           | 1,200          | 200             |       | 100    |
| MO        | 11,200          | 6,300          | 2,800           | 1,400 | 700    |
| MT        | 3,600           | 3,400          |                 | 100   | 100    |
| NE        | 8,500           | 2,400          | 100             |       | 6,000  |
| NV        | 300             | 300            |                 | 0     | 0      |
| NH        | 1/              |                |                 | 0     | 0      |
| NJ        | 1/              | 0              |                 | 0     | 0      |
| NM        | 1,400           | 500            | 600             | 100   | 200    |
| NY        | 800             | 100            | 400             | 200   | 100    |
| NC        | 600             | 500            | 100             | 0     |        |
| ND        | 3,200           | 2,500          | 100             | 400   | 200    |
| OH        | 500             | 200            | 200             |       | 100    |
| OK        | 8,800           | 2,800          | 700             | 100   | 5,200  |
| OR        | 600             | 400            | 0               | 200   | 0      |
| PA        | 800             | 100            | 600             | 100   | 0      |
| RI        | 0               | 0              | 0               | 0     | 0      |
| SC        | 600             | 100            | 400             |       | 100    |
| SD        | 8,700           | 7,100          | 300             | 300   | 1,000  |
| TN        | 1,000           | 900            | 100             |       |        |
| TX        | 9,400           | 3,700          | 1,200           | 100   | 4,400  |
| UT        | 500             | 300            | 100             |       | 100    |
| VT        | 300             |                | 300             | 0     | 0      |
| VA        | 1,400           | 900            | 300             | 100   | 100    |
| WA        | 1,200           | 200            | 500             | 100   | 400    |
| WV        | 200             | 100            | 100             |       |        |
| WI        | 1,700           | 100            | 1,300           | 300   |        |
| WY        | 2,600           | 2,500          |                 |       | 100    |
| Mt & West | 67,600          | 32,800         | 5,800           | 1,800 | 27,200 |
| Midwest   | 30,600          | 15,000         | 8,000           | 2,800 | 4,800  |
| So & East | 18,100          | 10,400         | 5,500           | 1,300 | 900    |
| US        | 116,300         | 58,200         | 19,300          | 5,900 | 32,900 |

1/ Less than 100 head for the State, but number is included in U.S. total.  
Totals may not add due to rounding.

Losses of Beef Cattle from Weather, by Size Group,  
State, Region and United States, 1991 <sup>1/</sup>

| State      | Weather |           |            |           |
|------------|---------|-----------|------------|-----------|
|            | Beef    |           |            |           |
|            | Total   | 1-49 Head | 50-99 Head | 100+ Head |
|            | Head    |           |            |           |
| AL         | 1,000   | 300       | 200        | 500       |
| AZ         | 2,900   |           |            | 2,900     |
| AR         | 1,200   | 200       | 400        | 600       |
| CA         | 600     |           | 100        | 500       |
| CO         | 1,400   | 100       | 300        | 1,000     |
| CT         | 0       | 0         | 0          | 0         |
| DE         | 0       | 0         | 0          | 0         |
| FL         | 2,000   |           | 100        | 1,900     |
| GA         | 800     | 300       | 100        | 400       |
| HI         | 400     |           | 0          | 400       |
| ID         | 200     | 0         |            | 200       |
| IL         | 700     | 500       | 100        | 100       |
| IN         | 500     | 400       |            | 100       |
| IA         | 5,000   | 1,600     | 900        | 2,500     |
| KS         | 1,200   | 200       | 300        | 700       |
| KY         | 1,500   | 500       | 800        | 200       |
| LA         | 1,200   | 300       | 100        | 800       |
| ME         | 0       | 0         | 0          | 0         |
| MD         |         |           | 0          |           |
| MA         |         |           | 0          | 0         |
| MI         | 100     | 100       | 0          |           |
| MN         | 900     | 500       | 300        | 100       |
| MS         | 1,200   | 100       | 200        | 900       |
| MO         | 6,300   | 1,400     | 2,400      | 2,500     |
| MT         | 3,400   | 100       | 200        | 3,100     |
| NE         | 2,400   | 200       | 200        | 2,000     |
| NV         | 300     | 0         | 0          | 300       |
| NH         |         |           | 0          | 0         |
| NJ         | 0       | 0         | 0          | 0         |
| NM         | 500     |           | 100        | 400       |
| NY         | 100     |           | 100        |           |
| NC         | 500     | 100       | 100        | 300       |
| ND         | 2,500   | 300       | 400        | 1,800     |
| OH         | 200     | 200       |            | 0         |
| OK         | 2,800   | 1,100     | 600        | 1,100     |
| OR         | 400     | 100       |            | 300       |
| PA         | 100     | 100       | 0          | 0         |
| RI         | 0       | 0         | 0          | 0         |
| SC         | 100     |           |            | 100       |
| SD         | 7,100   | 700       | 1,000      | 5,400     |
| TN         | 900     | 400       | 200        | 300       |
| TX         | 3,700   | 400       | 300        | 3,000     |
| UT         | 300     | 100       |            | 200       |
| VT         |         |           | 0          | 0         |
| VA         | 900     | 100       | 300        | 500       |
| WA         | 200     |           |            | 200       |
| WV         | 100     |           |            | 100       |
| WI         | 100     | 100       |            | 0         |
| WY         | 2,500   | 100       | 200        | 2,200     |
| Mt. & West | 32,800  | 3,400     | 3,700      | 25,700    |
| Midwest    | 15,000  | 5,000     | 4,100      | 5,900     |
| So & East  | 10,400  | 2,200     | 2,200      | 6,000     |
| US         | 58,200  | 10,600    | 10,000     | 37,600    |

<sup>1/</sup> Totals may not add due to rounding.

Losses of Dairy Cattle from Weather, by Size Group,  
State, Region and United States, 1991 <sup>1/</sup>

| State     | Weather |             |              |              |             |
|-----------|---------|-------------|--------------|--------------|-------------|
|           | Dairy   |             |              |              |             |
|           | Total   | : 1-29 Head | : 30-49 Head | : 50-99 Head | : 100+ Head |
|           | Head    |             |              |              |             |
| AL        | 100     | 0           | 0            | 0            | 100         |
| AZ        | 200     | 0           | 0            | 0            | 200         |
| AR        | 600     |             |              | 300          | 300         |
| CA        | 1,700   | 0           | 0            |              | 1,700       |
| CO        | 100     | 0           | 0            |              | 100         |
| CT        | 0       | 0           | 0            | 0            | 0           |
| DE        | 0       | 0           | 0            | 0            | 0           |
| FL        | 1,600   | 0           | 0            |              | 1,600       |
| GA        | 100     | 0           | 0            |              | 100         |
| HI        |         | 0           | 0            | 0            |             |
| ID        | 100     | 0           | 0            |              | 100         |
| IL        | 100     |             |              | 100          |             |
| IN        | 1,400   | 0           | 0            | 100          | 1,300       |
| IA        | 600     |             | 100          | 200          | 300         |
| KS        | 100     | 0           |              |              | 100         |
| KY        | 800     | 0           | 100          | 100          | 600         |
| LA        | 100     | 0           | 0            |              | 100         |
| ME        |         | 0           | 0            | 0            |             |
| MD        | 300     | 0           |              |              | 300         |
| MA        |         | 0           | 0            | 0            |             |
| MI        | 400     |             | 100          | 100          | 200         |
| MN        | 600     | 200         | 100          | 200          | 100         |
| MS        | 200     | 0           | 0            |              | 200         |
| MO        | 2,800   | 100         | 400          | 700          | 1,600       |
| MT        |         | 0           | 0            |              | 0           |
| NE        | 100     | 0           |              |              | 100         |
| NV        |         | 0           | 0            | 0            |             |
| NH        |         | 0           | 0            |              |             |
| NJ        |         | 0           | 0            |              |             |
| NM        | 600     | 0           | 0            | 0            | 600         |
| NY        | 400     |             |              | 200          | 200         |
| NC        | 100     | 0           | 0            | 100          |             |
| ND        | 100     |             | 0            | 0            | 100         |
| OH        | 200     |             |              | 100          | 100         |
| OK        | 700     |             | 100          | 100          | 500         |
| OR        | 0       | 0           | 0            | 0            | 0           |
| PA        | 600     | 0           | 100          |              | 500         |
| RI        | 0       | 0           | 0            | 0            | 0           |
| SC        | 400     | 0           | 0            |              | 400         |
| SD        | 300     | 0           |              | 100          | 200         |
| TN        | 100     | 0           | 0            |              | 100         |
| TX        | 1,200   | 0           | 0            |              | 1,200       |
| UT        | 100     | 0           |              | 0            | 100         |
| VT        | 300     |             |              | 100          | 200         |
| VA        | 300     | 0           | 0            | 100          | 200         |
| WA        | 500     | 0           |              | 0            | 500         |
| WV        | 100     | 0           | 0            |              | 100         |
| WI        | 1,300   | 100         | 300          | 500          | 400         |
| WY        |         | 0           | 0            | 0            |             |
| Mt & West | 5,800   | 0           | 100          | 200          | 5,500       |
| Midwest   | 8,000   | 400         | 1,000        | 2,300        | 4,300       |
| So & East | 5,500   | 0           | 200          | 600          | 4,700       |
| US        | 19,300  | 400         | 1,300        | 3,100        | 14,500      |

<sup>1/</sup> Totals may not add due to rounding.



Losses of Calves from Weather, by Class and Total,  
by State, Region and United States, 1991

| State     | Weather         |                |                 |       |        |
|-----------|-----------------|----------------|-----------------|-------|--------|
|           | Total<br>Calves | Beef<br>Calves | Dairy<br>Calves | Mixed | Other  |
|           | Head            |                |                 |       |        |
| AL        | 700             | 600            | 100             | 0     | 0      |
| AZ        | 5,000           | 500            | 200             |       | 4,300  |
| AR        | 1,600           | 1,200          | 400             |       |        |
| CA        | 5,400           | 1,700          | 3,500           | 100   | 100    |
| CO        | 3,600           | 2,800          | 400             |       | 400    |
| CT        | 0               | 0              | 0               | 0     | 0      |
| DE        | 1/              | 0              |                 | 0     | 0      |
| FL        | 1,500           | 1,300          | 100             | 100   |        |
| GA        | 1,300           | 900            | 200             | 100   | 100    |
| HI        | 600             | 600            |                 | 0     | 0      |
| ID        | 4,500           | 3,900          | 500             |       | 100    |
| IL        | 3,500           | 3,300          | 100             |       | 100    |
| IN        | 1,200           | 700            | 100             | 0     | 400    |
| IA        | 14,200          | 12,300         | 400             | 500   | 1,000  |
| KS        | 5,100           | 2,300          | 100             | 100   | 2,600  |
| KY        | 3,600           | 3,300          | 300             | 0     | 0      |
| LA        | 1,400           | 1,300          | 100             |       |        |
| ME        | 1/              |                |                 | 0     | 0      |
| MD        | 500             | 100            | 400             |       | 0      |
| MA        | 100             | 100            |                 | 0     | 0      |
| MI        | 1,100           | 600            | 400             | 0     | 100    |
| MN        | 4,300           | 3,500          | 300             | 300   | 200    |
| MS        | 1,300           | 900            | 100             | 300   |        |
| MO        | 12,800          | 11,200         | 1,000           | 500   | 100    |
| MT        | 9,000           | 8,700          | 200             | 100   |        |
| NE        | 8,800           | 7,500          | 500             | 200   | 600    |
| NV        | 900             | 900            |                 | 0     | 0      |
| NH        | 0               | 0              | 0               | 0     | 0      |
| NJ        | 1/              | 0              |                 | 0     | 0      |
| NM        | 4,900           | 1,200          | 3,100           | 500   | 100    |
| NY        | 1,300           | 200            | 900             | 100   | 100    |
| NC        | 1,200           | 1,200          |                 | 0     | 0      |
| ND        | 3,700           | 3,400          | 100             | 200   |        |
| OH        | 900             | 600            | 100             |       | 200    |
| OK        | 12,100          | 8,900          | 2,300           | 300   | 600    |
| OR        | 2,100           | 1,700          | 100             | 300   | 0      |
| PA        | 500             | 200            | 200             |       | 100    |
| RI        | 1/              |                |                 | 0     | 0      |
| SC        | 200             | 200            |                 |       | 0      |
| SD        | 13,700          | 13,100         | 300             | 200   | 100    |
| TN        | 2,400           | 1,900          | 400             | 100   |        |
| TX        | 14,100          | 7,600          | 4,200           | 800   | 1,500  |
| UT        | 2,200           | 1,400          | 300             | 400   | 100    |
| VT        | 400             | 0              | 300             | 100   | 0      |
| VA        | 3,400           | 2,200          | 600             | 500   | 100    |
| WA        | 1,500           | 500            | 800             | 200   | 0      |
| WV        | 900             | 500            | 400             | 0     |        |
| WI        | 1,200           | 400            | 300             | 400   | 100    |
| WY        | 8,700           | 8,300          |                 | 200   | 200    |
| Mt & West | 105,900         | 75,000         | 16,600          | 3,600 | 10,700 |
| Midwest   | 40,800          | 33,800         | 3,100           | 1,700 | 2,200  |
| So & East | 20,900          | 14,900         | 4,200           | 1,400 | 400    |
| US        | 167,600         | 123,700        | 23,900          | 6,700 | 13,300 |

1/ Less than 100 head for the State, but number is included in U.S. total.  
Totals may not add due to rounding.

Losses of Beef Calves from Weather, by Size Group,  
State, Region and United States, 1991 <sup>1/</sup>

| State     | Weather |           |            |           |
|-----------|---------|-----------|------------|-----------|
|           | Beef    |           |            |           |
|           | Total   | 1-49 Head | 50-99 Head | 100+ Head |
|           | Head    |           |            |           |
| AL        | 600     | 200       | 100        | 300       |
| AZ        | 500     |           |            | 500       |
| AR        | 1,200   | 400       | 400        | 400       |
| CA        | 1,700   | 100       | 200        | 1,400     |
| CO        | 2,800   | 300       | 200        | 2,300     |
| CT        | 0       | 0         | 0          | 0         |
| DE        | 0       | 0         | 0          | 0         |
| FL        | 1,300   | 100       |            | 1,200     |
| GA        | 900     | 200       | 100        | 600       |
| HI        | 600     |           | 0          | 600       |
| ID        | 3,900   | 100       | 200        | 3,600     |
| IL        | 3,300   | 1,400     | 1,100      | 800       |
| IN        | 700     | 400       | 100        | 200       |
| IA        | 12,300  | 3,400     | 2,900      | 6,000     |
| KS        | 2,300   | 600       | 700        | 1,000     |
| KY        | 3,300   | 1,900     | 800        | 600       |
| LA        | 1,300   | 300       | 300        | 700       |
| ME        |         |           | 0          | 0         |
| MD        | 100     | 100       |            |           |
| MA        | 100     |           | 100        | 0         |
| MI        | 600     | 200       | 300        | 100       |
| MN        | 3,500   | 2,100     | 600        | 800       |
| MS        | 900     | 200       | 100        | 600       |
| MO        | 11,200  | 2,200     | 2,400      | 6,600     |
| MT        | 8,700   | 300       | 400        | 8,000     |
| NE        | 7,500   | 1,000     | 500        | 6,000     |
| NV        | 900     |           | 0          | 900       |
| NH        | 0       | 0         | 0          | 0         |
| NJ        | 0       | 0         | 0          | 0         |
| NM        | 1,200   | 100       | 100        | 1,000     |
| NY        | 200     | 100       | 100        | 0         |
| NC        | 1,200   | 300       | 200        | 700       |
| ND        | 3,400   | 600       | 600        | 2,200     |
| OH        | 600     | 500       | 100        |           |
| OK        | 8,900   | 2,100     | 1,800      | 5,000     |
| OR        | 1,700   |           | 100        | 1,600     |
| PA        | 200     | 200       |            | 0         |
| RI        |         |           | 0          | 0         |
| SC        | 200     | 100       |            | 100       |
| SD        | 13,100  | 1,100     | 2,000      | 10,000    |
| TN        | 1,900   | 600       | 200        | 1,100     |
| TX        | 7,600   | 800       | 800        | 6,000     |
| UT        | 1,400   | 300       |            | 1,100     |
| VT        | 0       | 0         | 0          | 0         |
| VA        | 2,200   | 500       | 500        | 1,200     |
| WA        | 500     | 100       | 100        | 300       |
| WV        | 500     | 200       | 200        | 100       |
| WI        | 400     | 200       | 100        | 100       |
| WY        | 8,300   | 200       | 400        | 7,700     |
| Mt & West | 75,000  | 7,700     | 8,100      | 59,200    |
| Midwest   | 33,800  | 10,800    | 8,000      | 15,000    |
| So & East | 14,900  | 5,000     | 2,700      | 7,200     |
| US        | 123,700 | 23,500    | 18,800     | 81,400    |

<sup>1/</sup> Totals may not add due to rounding.

Losses of Dairy Calves from Weather, by Size Group,  
State, Region and United States, 1991 <sup>1/</sup>

| State     | Weather |             |              |              |             |
|-----------|---------|-------------|--------------|--------------|-------------|
|           | Dairy   |             |              |              |             |
|           | Total   | : 1-29 Head | : 30-49 Head | : 50-99 Head | : 100+ Head |
|           | Head    |             |              |              |             |
| AL        | 100     | 0           | 0            |              | 100         |
| AZ        | 200     | 0           | 0            | 0            | 200         |
| AR        | 400     | 0           |              | 100          | 300         |
| CA        | 3,500   | 0           |              | 0            | 3,500       |
| CO        | 400     | 0           |              |              | 400         |
| CT        | 0       | 0           | 0            | 0            | 0           |
| DE        |         | 0           | 0            | 0            |             |
| FL        | 100     | 0           | 0            | 0            | 100         |
| GA        | 200     | 0           | 0            | 0            | 200         |
| HI        |         | 0           | 0            | 0            |             |
| ID        | 500     |             | 100          |              | 400         |
| IL        | 100     |             |              |              | 100         |
| IN        | 100     | 0           | 0            | 0            | 100         |
| IA        | 400     |             | 100          | 100          | 200         |
| KS        | 100     | 0           | 0            | 0            | 100         |
| KY        | 300     |             | 100          | 100          | 100         |
| LA        | 100     | 0           | 0            | 0            | 100         |
| ME        |         | 0           | 0            |              |             |
| MD        | 400     | 0           | 0            |              | 400         |
| MA        |         | 0           |              |              |             |
| MI        | 400     | 0           | 100          | 100          | 200         |
| MN        | 300     | 100         | 100          | 100          |             |
| MS        | 100     | 0           | 0            | 0            | 100         |
| MO        | 1,000   | 300         | 100          | 100          | 500         |
| MT        | 200     | 100         | 0            | 0            | 100         |
| NE        | 500     | 100         | 100          |              | 300         |
| NV        |         | 0           | 0            | 0            |             |
| NH        | 0       | 0           | 0            | 0            | 0           |
| NJ        |         | 0           | 0            | 0            |             |
| NM        | 3,100   | 0           | 0            | 0            | 3,100       |
| NY        | 900     |             | 200          | 200          | 500         |
| NC        |         | 0           | 0            | 0            |             |
| ND        | 100     | 0           | 0            |              | 100         |
| OH        | 100     | 100         |              | 0            | 0           |
| OK        | 2,300   | 0           | 0            | 200          | 2,100       |
| OR        | 100     | 0           |              | 100          |             |
| PA        | 200     | 0           |              | 0            | 200         |
| RI        |         | 0           |              | 0            | 0           |
| SC        |         | 0           | 0            | 0            |             |
| SD        | 300     | 0           | 0            |              | 300         |
| TN        | 400     | 0           | 0            | 200          | 200         |
| TX        | 4,200   | 0           | 0            | 0            | 4,200       |
| UT        | 300     | 0           |              | 100          | 200         |
| VT        | 300     | 0           |              | 100          | 200         |
| VA        | 600     | 0           |              | 0            | 600         |
| WA        | 800     | 0           | 0            |              | 800         |
| WV        | 400     | 0           | 0            | 100          | 300         |
| WI        | 300     | 0           |              | 200          | 100         |
| WY        |         | 0           | 0            |              |             |
| Mt & West | 16,600  | 200         | 200          | 400          | 15,800      |
| Midwest   | 3,100   | 500         | 400          | 700          | 1,500       |
| So & East | 4,200   |             | 300          | 700          | 3,200       |
| US        | 23,900  | 700         | 900          | 1,800        | 20,500      |

<sup>1/</sup> Totals may not add due to rounding.

Losses of Cattle from Poison, by Class and Total,  
by State, Region and United States, 1991

| State     | Poison          |                |                 |       |       |
|-----------|-----------------|----------------|-----------------|-------|-------|
|           | Total<br>Cattle | Beef<br>Cattle | Dairy<br>Cattle | Mixed | Other |
|           | Head            |                |                 |       |       |
| AL        | 700             | 600            | 100             |       | 0     |
| AZ        | 1,200           | 1,200          |                 | 0     |       |
| AR        | 1,400           | 1,200          | 100             | 100   |       |
| CA        | 1,100           | 1,000          | 100             |       | 0     |
| CO        | 5,100           | 4,100          |                 | 0     | 1,000 |
| CT        | 0               | 0              | 0               | 0     | 0     |
| DE        | 0               | 0              | 0               | 0     | 0     |
| FL        | 200             | 200            |                 | 0     | 0     |
| GA        | 1,900           | 1,500          | 200             | 100   | 100   |
| HI        | 1/              | 0              | 0               | 0     |       |
| ID        | 1,800           | 1,700          | 100             | 0     |       |
| IL        | 600             | 400            | 100             |       | 100   |
| IN        | 600             | 100            | 400             | 100   |       |
| IA        | 500             | 300            | 100             | 0     | 100   |
| KS        | 1,900           | 1,000          | 100             |       | 800   |
| KY        | 2,300           | 1,500          | 400             |       | 400   |
| LA        | 300             | 100            | 100             | 100   |       |
| ME        | 1/              | 0              |                 | 0     | 0     |
| MD        | 100             | 0              | 100             | 0     | 0     |
| MA        | 1/              |                |                 | 0     | 0     |
| MI        | 200             | 100            | 100             | 0     |       |
| MN        | 500             | 100            | 300             | 100   | 0     |
| MS        | 1,200           | 800            | 300             | 0     | 100   |
| MO        | 2,400           | 1,600          | 500             | 300   | 0     |
| MT        | 1,400           | 1,200          | 0               | 100   | 100   |
| NE        | 1,200           | 900            | 100             | 100   | 100   |
| NV        | 500             | 500            | 0               |       | 0     |
| NH        | 0               | 0              | 0               | 0     | 0     |
| NJ        | 1/              | 0              |                 | 0     |       |
| NM        | 700             | 700            |                 | 0     |       |
| NY        | 200             |                | 200             | 0     | 0     |
| NC        | 200             | 200            |                 | 0     | 0     |
| ND        | 300             | 300            | 0               | 0     |       |
| OH        | 600             | 300            | 200             | 100   |       |
| OK        | 3,700           | 2,300          | 1,400           | 0     |       |
| OR        | 1,400           | 1,300          | 100             | 0     |       |
| PA        | 400             | 100            | 300             |       | 0     |
| RI        | 0               | 0              | 0               | 0     | 0     |
| SC        | 200             | 100            | 100             |       | 0     |
| SD        | 2,000           | 2,000          |                 |       | 0     |
| TN        | 2,000           | 1,700          | 200             | 100   | 0     |
| TX        | 4,100           | 2,600          | 800             | 500   | 200   |
| UT        | 700             | 600            | 100             | 0     | 0     |
| VT        | 400             | 0              | 400             |       | 0     |
| VA        | 1,100           | 500            | 300             | 300   |       |
| WA        | 300             | 300            |                 |       | 0     |
| WV        | 300             | 100            | 0               | 100   | 100   |
| WI        | 1,000           |                | 1,000           | 0     |       |
| WY        | 2,600           | 2,500          |                 |       | 100   |
| Mt & West | 30,100          | 24,200         | 2,900           | 700   | 2,300 |
| Midwest   | 7,800           | 4,100          | 2,800           | 700   | 200   |
| So & East | 11,600          | 7,400          | 2,700           | 700   | 800   |
| US        | 49,500          | 35,700         | 8,400           | 2,100 | 3,300 |

1/ Less than 100 head for the State, but number is included in U.S. total.  
Totals may not add due to rounding.

Losses of Beef Cattle from Poison, by Size Group,  
State, Region and United States, 1991 <sup>1/</sup>

| State     | Poison |           |            |           |
|-----------|--------|-----------|------------|-----------|
|           | Beef   |           |            |           |
|           | Total  | 1-49 Head | 50-99 Head | 100+ Head |
|           | Head   |           |            |           |
| AL        | 600    | 200       | 200        | 200       |
| AZ        | 1,200  | 0         |            | 1,200     |
| AR        | 1,200  | 200       | 300        | 700       |
| CA        | 1,000  |           |            | 1,000     |
| CO        | 4,100  | 100       | 100        | 3,900     |
| CT        | 0      | 0         | 0          | 0         |
| DE        | 0      | 0         | 0          | 0         |
| FL        | 200    |           | 200        |           |
| GA        | 1,500  | 300       | 600        | 600       |
| HI        | 0      | 0         | 0          | 0         |
| ID        | 1,700  |           |            | 1,700     |
| IL        | 400    | 300       |            | 100       |
| IN        | 100    | 100       |            |           |
| IA        | 300    | 200       |            | 100       |
| KS        | 1,000  | 200       | 100        | 700       |
| KY        | 1,500  | 700       | 700        | 100       |
| LA        | 100    |           |            | 100       |
| ME        | 0      | 0         | 0          | 0         |
| MD        | 0      | 0         | 0          | 0         |
| MA        |        | 0         |            | 0         |
| MI        | 100    |           | 100        | 0         |
| MN        | 100    | 100       |            |           |
| MS        | 800    | 100       | 200        | 500       |
| MO        | 1,600  | 200       | 600        | 800       |
| MT        | 1,200  |           |            | 1,200     |
| NE        | 900    | 100       | 200        | 600       |
| NV        | 500    |           | 0          | 500       |
| NH        | 0      | 0         | 0          | 0         |
| NJ        | 0      | 0         | 0          | 0         |
| NM        | 700    |           | 100        | 600       |
| NY        |        |           | 0          | 0         |
| NC        | 200    | 100       | 100        | 0         |
| ND        | 300    |           |            | 300       |
| OH        | 300    | 200       | 0          | 100       |
| OK        | 2,300  | 500       | 600        | 1,200     |
| OR        | 1,300  |           |            | 1,300     |
| PA        | 100    | 100       |            | 0         |
| RI        | 0      | 0         | 0          | 0         |
| SC        | 100    |           | 100        | 0         |
| SD        | 2,000  | 100       | 100        | 1,800     |
| TN        | 1,700  | 400       | 300        | 1,000     |
| TX        | 2,600  | 500       | 200        | 1,900     |
| UT        | 600    |           | 100        | 500       |
| VT        | 0      | 0         | 0          | 0         |
| VA        | 500    | 100       | 100        | 300       |
| WA        | 300    | 0         | 0          | 300       |
| WV        | 100    | 100       |            |           |
| WI        |        |           | 0          | 0         |
| WY        | 2,500  | 100       |            | 2,400     |
| Mt & West | 24,200 | 1,600     | 1,500      | 21,100    |
| Midwest   | 4,100  | 1,300     | 1,000      | 1,800     |
| So & East | 7,400  | 2,100     | 2,500      | 2,800     |
| US        | 35,700 | 5,000     | 5,000      | 25,700    |

<sup>1/</sup> Totals may not add due to rounding.

Losses of Dairy Cattle from Poison, by Size Group,  
State, Region and United States, 1991 <sup>1/</sup>

| State     | Poison |           |            |            |           |
|-----------|--------|-----------|------------|------------|-----------|
|           | Dairy  |           |            |            |           |
|           | Total  | 1-29 Head | 30-49 Head | 50-99 Head | 100+ Head |
|           |        |           | Head       |            |           |
| AL        | 100    | 0         | 0          |            | 100       |
| AZ        |        | 0         | 0          | 0          |           |
| AR        | 100    | 0         | 0          | 0          | 100       |
| CA        | 100    | 0         | 0          | 0          | 100       |
| CO        |        | 0         | 0          | 0          |           |
| CT        | 0      | 0         | 0          | 0          | 0         |
| DE        | 0      | 0         | 0          | 0          | 0         |
| FL        |        | 0         | 0          | 0          |           |
| GA        | 200    | 0         | 0          | 100        | 100       |
| HI        | 0      | 0         | 0          | 0          | 0         |
| ID        | 100    | 0         | 100        | 0          |           |
| IL        | 100    | 0         | 0          | 100        |           |
| IN        | 400    | 0         |            | 200        | 200       |
| IA        | 100    | 0         | 0          | 100        | 0         |
| KS        | 100    | 0         | 0          |            | 100       |
| KY        | 400    | 200       | 100        | 100        | 0         |
| LA        | 100    | 0         | 0          | 100        |           |
| ME        |        | 0         |            |            | 0         |
| MD        | 100    | 0         | 0          |            | 100       |
| MA        |        | 0         |            |            |           |
| MI        | 100    | 0         | 0          |            | 100       |
| MN        | 300    |           | 0          | 300        | 0         |
| MS        | 300    | 0         |            | 100        | 200       |
| MO        | 500    | 0         | 0          | 100        | 400       |
| MT        | 0      | 0         | 0          | 0          | 0         |
| NE        | 100    | 0         | 0          | 0          | 100       |
| NV        | 0      | 0         | 0          | 0          | 0         |
| NH        | 0      | 0         | 0          | 0          | 0         |
| NJ        |        | 0         | 0          |            |           |
| NM        |        | 0         | 0          |            | 0         |
| NY        | 200    |           | 0          | 100        | 100       |
| NC        |        | 0         | 0          | 0          |           |
| ND        | 0      | 0         | 0          | 0          | 0         |
| OH        | 200    |           | 0          | 200        |           |
| OK        | 1,400  | 0         | 0          | 0          | 1,400     |
| OR        | 100    | 0         | 0          | 0          | 100       |
| PA        | 300    |           |            | 200        | 100       |
| RI        | 0      | 0         | 0          | 0          | 0         |
| SC        | 100    | 0         | 0          | 0          | 100       |
| SD        |        |           |            | 0          | 0         |
| TN        | 200    | 0         | 100        |            | 100       |
| TX        | 800    | 0         | 0          | 0          | 800       |
| UT        | 100    | 0         |            | 0          | 100       |
| VT        | 400    | 0         |            | 0          | 400       |
| VA        | 300    |           | 0          | 100        | 200       |
| WA        |        | 0         | 0          |            |           |
| WV        | 0      | 0         | 0          | 0          | 0         |
| WI        | 1,000  | 100       |            |            | 900       |
| WY        |        | 0         | 0          | 0          |           |
| Mt & West | 2,900  | 0         | 100        | 0          | 2,800     |
| Midwest   | 2,800  | 100       | 0          | 1,000      | 1,700     |
| So & East | 2,700  | 200       | 200        | 800        | 1,500     |
| US        | 8,400  | 300       | 300        | 1,800      | 6,000     |

<sup>1/</sup> Totals may not add due to rounding.

Losses of Calves from Poison, by Class and Total,  
by State, Region and United States, 1991

| State     | Poison          |                |                 |       |       |
|-----------|-----------------|----------------|-----------------|-------|-------|
|           | Total<br>Calves | Beef<br>Calves | Dairy<br>Calves | Mixed | Other |
|           |                 |                | Head            |       |       |
| AL        | 300             | 300            |                 | 0     | 0     |
| AZ        | 100             | 100            | 0               | 0     | 0     |
| AR        | 200             | 200            | 0               | 0     |       |
| CA        | 200             |                | 200             |       | 0     |
| CO        | 900             | 700            | 100             | 0     | 100   |
| CT        | 1/              |                | 0               | 0     | 0     |
| DE        | 0               | 0              | 0               | 0     | 0     |
| FL        | 200             | 200            | 0               | 0     | 0     |
| GA        | 600             | 400            | 200             |       |       |
| HI        | 1/              | 0              | 0               | 0     |       |
| ID        | 500             | 400            | 100             | 0     | 0     |
| IL        | 600             | 400            | 100             | 0     | 100   |
| IN        | 200             | 100            | 0               | 0     | 100   |
| IA        | 1,100           | 300            | 200             | 0     | 600   |
| KS        | 300             | 300            | 0               |       |       |
| KY        | 700             | 400            | 200             |       | 100   |
| LA        | 200             | 200            | 0               | 0     | 0     |
| ME        | 0               | 0              | 0               | 0     | 0     |
| MD        | 0               | 0              | 0               | 0     | 0     |
| MA        | 1/              | 0              |                 | 0     | 0     |
| MI        | 200             |                | 200             | 0     | 0     |
| MN        | 500             | 100            |                 |       | 400   |
| MS        | 200             | 200            |                 | 0     | 0     |
| MO        | 1,000           | 1,000          | 0               | 0     | 0     |
| MT        | 400             | 400            |                 | 0     | 0     |
| NE        | 200             | 100            | 100             | 0     |       |
| NV        | 200             | 200            | 0               | 0     | 0     |
| NH        | 0               | 0              | 0               | 0     | 0     |
| NJ        | 1/              | 0              |                 | 0     | 0     |
| NM        | 400             | 400            | 0               | 0     | 0     |
| NY        | 300             |                | 300             | 0     | 0     |
| NC        | 200             | 100            | 100             | 0     | 0     |
| ND        | 500             | 500            | 0               |       | 0     |
| OH        | 200             |                | 200             | 0     | 0     |
| OK        | 2,300           | 2,200          | 100             | 0     | 0     |
| OR        | 400             | 400            | 0               | 0     |       |
| PA        | 500             | 0              | 400             | 100   | 0     |
| RI        | 0               | 0              | 0               | 0     | 0     |
| SC        | 600             | 100            | 500             | 0     | 0     |
| SD        | 300             | 300            | 0               | 0     | 0     |
| TN        | 1,100           | 500            | 600             | 0     | 0     |
| TX        | 2,100           | 1,400          | 600             | 100   |       |
| UT        | 300             | 300            |                 | 0     | 0     |
| VT        | 200             | 0              |                 | 200   | 0     |
| VA        | 400             | 400            | 0               |       | 0     |
| WA        | 100             | 100            |                 | 0     | 0     |
| WV        | 200             | 200            |                 | 0     | 0     |
| WI        | 300             | 100            | 100             | 0     | 100   |
| WY        | 700             | 500            | 100             | 0     | 100   |
| Mt & West | 10,000          | 8,300          | 1,400           | 100   | 200   |
| Midwest   | 4,300           | 2,200          | 800             | 0     | 1,300 |
| So & East | 5,800           | 3,000          | 2,400           | 300   | 100   |
| US        | 20,100          | 13,500         | 4,600           | 400   | 1,600 |

1/ Less than 100 head for the State, but number is included in U.S. total.  
Totals may not add due to rounding.

Losses of Beef Calves from Poison, by Size Group,  
State, Region and United States, 1991 <sup>1/</sup>

| State     | Poison |           |            |           |
|-----------|--------|-----------|------------|-----------|
|           | Beef   |           |            |           |
|           | Total  | 1-49 Head | 50-99 Head | 100+ Head |
|           | Head   |           |            |           |
| AL        | 300    | 100       | 100        | 100       |
| AZ        | 100    | 0         |            | 100       |
| AR        | 200    | 100       | 100        | 0         |
| CA        |        | 0         | 0          |           |
| CO        | 700    |           | 100        | 600       |
| CT        |        |           | 0          | 0         |
| DE        | 0      | 0         | 0          | 0         |
| FL        | 200    |           | 100        | 100       |
| GA        | 400    |           | 200        | 200       |
| HI        | 0      | 0         | 0          | 0         |
| ID        | 400    | 100       |            | 300       |
| IL        | 400    | 200       | 200        |           |
| IN        | 100    | 100       | 0          | 0         |
| IA        | 300    | 200       | 100        |           |
| KS        | 300    | 100       |            | 200       |
| KY        | 400    | 400       | 0          |           |
| LA        | 200    | 100       | 100        | 0         |
| ME        | 0      | 0         | 0          | 0         |
| MD        | 0      | 0         | 0          | 0         |
| MA        | 0      | 0         | 0          | 0         |
| MI        |        |           |            | 0         |
| MN        | 100    |           | 100        | 0         |
| MS        | 200    |           | 100        | 100       |
| MO        | 1,000  | 100       | 300        | 600       |
| MT        | 400    |           |            | 400       |
| NE        | 100    |           |            | 100       |
| NV        | 200    |           | 0          | 200       |
| NH        | 0      | 0         | 0          | 0         |
| NJ        | 0      | 0         | 0          | 0         |
| NM        | 400    |           | 100        | 300       |
| NY        |        |           | 0          | 0         |
| NC        | 100    | 100       | 0          | 0         |
| ND        | 500    |           | 100        | 400       |
| OH        |        |           | 0          | 0         |
| OK        | 2,200  | 100       | 100        | 2,000     |
| OR        | 400    |           |            | 400       |
| PA        | 0      | 0         | 0          | 0         |
| RI        | 0      | 0         | 0          | 0         |
| SC        | 100    | 100       | 0          | 0         |
| SD        | 300    | 0         | 0          | 300       |
| TN        | 500    | 200       | 200        | 100       |
| TX        | 1,400  | 300       | 200        | 900       |
| UT        | 300    |           |            | 300       |
| VT        | 0      | 0         | 0          | 0         |
| VA        | 400    | 100       | 100        | 200       |
| WA        | 100    |           | 0          | 100       |
| WV        | 200    |           | 200        | 0         |
| WI        | 100    | 100       | 0          | 0         |
| WY        | 500    | 100       |            | 400       |
| Mt & West | 8,300  | 700       | 600        | 7,000     |
| Midwest   | 2,200  | 800       | 800        | 600       |
| So & East | 3,000  | 1,100     | 1,100      | 800       |
| US        | 13,500 | 2,600     | 2,500      | 8,400     |

<sup>1/</sup> Totals may not add due to rounding.



Losses of Dairy Calves from Poison, by Size Group,  
State, Region and United States, 1991 1/

| State     | Poison |           |            |            |           |
|-----------|--------|-----------|------------|------------|-----------|
|           | Dairy  |           |            |            |           |
|           | Total  | 1-29 Head | 30-49 Head | 50-99 Head | 100+ Head |
|           | Head   |           |            |            |           |
| AL        |        | 0         | 0          | 0          |           |
| AZ        | 0      | 0         | 0          | 0          | 0         |
| AR        | 0      | 0         | 0          | 0          | 0         |
| CA        | 200    | 0         | 0          | 0          | 200       |
| CO        | 100    | 0         | 0          | 0          | 100       |
| CT        | 0      | 0         | 0          | 0          | 0         |
| DE        | 0      | 0         | 0          | 0          | 0         |
| FL        | 0      | 0         | 0          | 0          | 0         |
| GA        | 200    | 0         | 0          | 200        | 0         |
| HI        | 0      | 0         | 0          | 0          | 0         |
| ID        | 100    | 0         | 0          | 0          | 100       |
| IL        | 100    | 0         | 0          | 0          | 100       |
| IN        | 0      | 0         | 0          | 0          | 0         |
| IA        | 200    | 0         | 100        | 100        | 0         |
| KS        | 0      | 0         | 0          | 0          | 0         |
| KY        | 200    | 0         | 200        | 0          | 0         |
| LA        | 0      | 0         | 0          | 0          | 0         |
| ME        | 0      | 0         | 0          | 0          | 0         |
| MD        | 0      | 0         | 0          | 0          | 0         |
| MA        |        | 0         | 0          | 0          |           |
| MI        | 200    | 0         | 0          | 200        | 0         |
| MN        |        | 0         | 0          |            | 0         |
| MS        |        | 0         | 0          | 0          |           |
| MO        | 0      | 0         | 0          | 0          | 0         |
| MT        |        | 0         | 0          |            | 0         |
| NE        | 100    | 0         | 0          | 0          | 100       |
| NV        | 0      | 0         | 0          | 0          | 0         |
| NH        | 0      | 0         | 0          | 0          | 0         |
| NJ        |        | 0         | 0          |            |           |
| NM        | 0      | 0         | 0          | 0          | 0         |
| NY        | 300    | 100       | 0          |            | 200       |
| NC        | 100    | 0         | 0          | 100        | 0         |
| ND        | 0      | 0         | 0          | 0          | 0         |
| OH        | 200    | 0         | 200        | 0          | 0         |
| OK        | 100    | 0         | 100        | 0          | 0         |
| OR        | 0      | 0         | 0          | 0          | 0         |
| PA        | 400    | 0         | 0          | 400        | 0         |
| RI        | 0      | 0         | 0          | 0          | 0         |
| SC        | 500    | 0         | 0          | 0          | 500       |
| SD        | 0      | 0         | 0          | 0          | 0         |
| TN        | 600    | 0         | 0          | 0          | 600       |
| TX        | 600    | 0         | 0          | 0          | 600       |
| UT        |        | 0         | 0          | 0          |           |
| VT        |        | 0         | 0          | 0          |           |
| VA        | 0      | 0         | 0          | 0          | 0         |
| WA        |        |           | 0          | 0          | 0         |
| WV        |        | 0         | 0          | 0          |           |
| WI        | 100    | 0         | 0          | 100        | 0         |
| WY        | 100    | 0         | 0          | 100        | 0         |
| Mt & West | 1,400  | 0         | 100        | 100        | 1,200     |
| Midwest   | 800    | 0         | 300        | 400        | 100       |
| So & East | 2,400  | 100       | 200        | 700        | 1,400     |
| US        | 4,600  | 100       | 600        | 1,200      | 2,700     |

1/ Totals may not add due to rounding.

Losses of Cattle from Theft, by Class and Total,  
by State, Region and United States, 1991

| State     | Theft           |                |                 |       |       |
|-----------|-----------------|----------------|-----------------|-------|-------|
|           | Total<br>Cattle | Beef<br>Cattle | Dairy<br>Cattle | Mixed | Other |
|           | Head            |                |                 |       |       |
| AL        | 100             |                | 100             | 0     | 0     |
| AZ        | 100             | 100            | 0               | 0     | 0     |
| AR        | 500             | 500            |                 | 0     | 0     |
| CA        | 500             | 200            | 100             | 100   | 100   |
| CO        | 400             | 400            | 0               | 0     | 0     |
| CT        | 0               | 0              | 0               | 0     | 0     |
| DE        | 0               | 0              | 0               | 0     | 0     |
| FL        | 200             | 100            | 100             | 0     | 0     |
| GA        | 0               | 0              | 0               | 0     | 0     |
| HI        | 100             | 100            | 0               |       | 0     |
| ID        | 300             | 300            | 0               |       |       |
| IL        | 100             |                | 0               | 0     | 100   |
| IN        | 100             | 0              | 100             | 0     | 0     |
| IA        | 400             | 200            | 100             | 0     | 100   |
| KS        | 800             | 500            | 0               |       | 300   |
| KY        | 300             | 200            | 100             | 0     | 0     |
| LA        | 700             | 700            | 0               | 0     | 0     |
| ME        | 0               | 0              | 0               | 0     | 0     |
| MD        | 100             | 100            |                 | 0     | 0     |
| MA        | 1/              | 0              |                 | 0     | 0     |
| MI        | 0               | 0              | 0               | 0     | 0     |
| MN        | 0               | 0              | 0               | 0     | 0     |
| MS        | 200             | 200            | 0               | 0     | 0     |
| MO        | 1,300           | 1,100          | 200             | 0     | 0     |
| MT        | 300             | 300            | 0               |       | 0     |
| NE        | 200             | 100            |                 |       | 100   |
| NV        | 1/              |                | 0               | 0     | 0     |
| NH        | 0               | 0              | 0               | 0     | 0     |
| NJ        | 0               | 0              | 0               | 0     | 0     |
| NM        | 300             | 200            | 100             | 0     | 0     |
| NY        | 1/              | 0              |                 | 0     | 0     |
| NC        | 0               | 0              | 0               | 0     | 0     |
| ND        | 300             | 300            | 0               | 0     | 0     |
| OH        | 300             | 300            |                 | 0     | 0     |
| OK        | 4,600           | 4,200          |                 | 0     | 400   |
| OR        | 0               | 0              | 0               | 0     | 0     |
| PA        | 0               | 0              | 0               | 0     | 0     |
| RI        | 0               | 0              | 0               | 0     | 0     |
| SC        | 0               | 0              | 0               | 0     | 0     |
| SD        | 700             | 600            | 0               |       | 100   |
| TN        | 600             | 300            | 100             | 200   |       |
| TX        | 900             | 800            |                 | 0     | 100   |
| UT        | 100             | 100            | 0               |       | 0     |
| VT        | 0               | 0              | 0               | 0     | 0     |
| VA        | 200             | 200            |                 | 0     | 0     |
| WA        | 600             | 600            |                 |       |       |
| WV        | 1/              |                |                 | 0     | 0     |
| WI        | 100             |                | 100             | 0     |       |
| WY        | 500             | 500            | 0               |       |       |
| Mt & West | 10,800          | 9,300          | 300             | 100   | 1,100 |
| Midwest   | 2,800           | 2,100          | 500             | 0     | 200   |
| So & East | 2,600           | 1,800          | 600             | 200   | 0     |
| US        | 16,200          | 13,200         | 1,400           | 300   | 1,300 |

1/ Less than 100 head for the State, but number is included in U.S. total.  
Totals may not add due to rounding.

Losses of Beef Cattle from Theft, by Size Group,  
State, Region and United States, 1991 <sup>1/</sup>

| State     | Theft  |           |            |           |
|-----------|--------|-----------|------------|-----------|
|           | Beef   |           |            |           |
|           | Total  | 1-49 Head | 50-99 Head | 100+ Head |
|           | Head   |           |            |           |
| AL        |        |           |            | 0         |
| AZ        | 100    | 0         | 0          | 100       |
| AR        | 500    | 0         | 100        | 400       |
| CA        | 200    |           |            | 200       |
| CO        | 400    | 0         |            | 400       |
| CT        | 0      | 0         | 0          | 0         |
| DE        | 0      | 0         | 0          | 0         |
| FL        | 100    |           |            | 100       |
| GA        | 0      | 0         | 0          | 0         |
| HI        | 100    |           | 0          | 100       |
| ID        | 300    |           |            | 300       |
| IL        |        |           |            |           |
| IN        | 0      | 0         | 0          | 0         |
| IA        | 200    |           | 100        | 100       |
| KS        | 500    | 100       | 100        | 300       |
| KY        | 200    | 0         | 100        | 100       |
| LA        | 700    | 0         | 600        | 100       |
| ME        | 0      | 0         | 0          | 0         |
| MD        | 100    | 0         | 100        | 0         |
| MA        | 0      | 0         | 0          | 0         |
| MI        | 0      | 0         | 0          | 0         |
| MN        | 0      | 0         | 0          | 0         |
| MS        | 200    | 100       |            | 100       |
| MO        | 1,100  | 100       | 100        | 900       |
| MT        | 300    | 0         |            | 300       |
| NE        | 100    |           |            | 100       |
| NV        |        | 0         | 0          |           |
| NH        | 0      | 0         | 0          | 0         |
| NJ        | 0      | 0         | 0          | 0         |
| NM        | 200    |           |            | 200       |
| NY        | 0      | 0         | 0          | 0         |
| NC        | 0      | 0         | 0          | 0         |
| ND        | 300    | 0         | 0          | 300       |
| OH        | 300    | 300       | 0          | 0         |
| OK        | 4,200  | 1,900     | 200        | 2,100     |
| OR        | 0      | 0         | 0          | 0         |
| PA        | 0      | 0         | 0          | 0         |
| RI        | 0      | 0         | 0          | 0         |
| SC        | 0      | 0         | 0          | 0         |
| SD        | 600    | 0         | 100        | 500       |
| TN        | 300    | 100       | 200        | 0         |
| TX        | 800    | 100       | 200        | 500       |
| UT        | 100    | 0         | 0          | 100       |
| VT        | 0      | 0         | 0          | 0         |
| VA        | 200    | 0         | 0          | 200       |
| WA        | 600    |           |            | 600       |
| WV        |        |           | 0          | 0         |
| WI        |        | 0         |            | 0         |
| WY        | 500    |           | 0          | 500       |
| Mt & West | 9,300  | 2,100     | 600        | 6,600     |
| Midwest   | 2,100  | 400       | 300        | 1,400     |
| So & East | 1,800  | 200       | 1,000      | 600       |
| US        | 13,200 | 2,700     | 1,900      | 8,600     |

<sup>1/</sup> Totals may not add due to rounding.

Losses of Dairy Cattle from Theft, by Size Group,  
State, Region and United States, 1991 <sup>1/</sup>

| State     | Theft |             |              |              |             |
|-----------|-------|-------------|--------------|--------------|-------------|
|           | Dairy |             |              |              |             |
|           | Total | : 1-29 Head | : 30-49 Head | : 50-99 Head | : 100+ Head |
|           | Head  |             |              |              |             |
| AL        | 100   | 0           | 0            | 0            | 100         |
| AZ        | 0     | 0           | 0            | 0            | 0           |
| AR        | 0     | 0           | 0            | 0            | 0           |
| CA        | 100   | 0           | 0            | 0            | 100         |
| CO        | 0     | 0           | 0            | 0            | 0           |
| CT        | 0     | 0           | 0            | 0            | 0           |
| DE        | 0     | 0           | 0            | 0            | 0           |
| FL        | 100   | 0           | 0            | 0            | 100         |
| GA        | 0     | 0           | 0            | 0            | 0           |
| HI        | 0     | 0           | 0            | 0            | 0           |
| ID        | 0     | 0           | 0            | 0            | 0           |
| IL        | 0     | 0           | 0            | 0            | 0           |
| IN        | 100   | 0           | 0            | 0            | 100         |
| IA        | 100   | 0           | 0            | 100          | 0           |
| KS        | 0     | 0           | 0            | 0            | 0           |
| KY        | 100   | 0           | 100          | 0            | 0           |
| LA        | 0     | 0           | 0            | 0            | 0           |
| ME        | 0     | 0           | 0            | 0            | 0           |
| MD        | 0     | 0           | 0            | 0            | 0           |
| MA        | 0     | 0           | 0            | 0            | 0           |
| MI        | 0     | 0           | 0            | 0            | 0           |
| MN        | 0     | 0           | 0            | 0            | 0           |
| MS        | 0     | 0           | 0            | 0            | 0           |
| MO        | 200   | 0           | 0            | 0            | 200         |
| MT        | 0     | 0           | 0            | 0            | 0           |
| NE        | 0     | 0           | 0            | 0            | 0           |
| NV        | 0     | 0           | 0            | 0            | 0           |
| NH        | 0     | 0           | 0            | 0            | 0           |
| NJ        | 0     | 0           | 0            | 0            | 0           |
| NM        | 100   | 0           | 0            | 0            | 100         |
| NY        | 0     | 0           | 0            | 0            | 0           |
| NC        | 0     | 0           | 0            | 0            | 0           |
| ND        | 0     | 0           | 0            | 0            | 0           |
| OH        | 0     | 0           | 0            | 0            | 0           |
| OK        | 0     | 0           | 0            | 0            | 0           |
| OR        | 0     | 0           | 0            | 0            | 0           |
| PA        | 0     | 0           | 0            | 0            | 0           |
| RI        | 0     | 0           | 0            | 0            | 0           |
| SC        | 0     | 0           | 0            | 0            | 0           |
| SD        | 0     | 0           | 0            | 0            | 0           |
| TN        | 100   | 0           | 0            | 0            | 100         |
| TX        | 0     | 0           | 0            | 0            | 0           |
| UT        | 0     | 0           | 0            | 0            | 0           |
| VT        | 0     | 0           | 0            | 0            | 0           |
| VA        | 0     | 0           | 0            | 0            | 0           |
| WA        | 0     | 0           | 0            | 0            | 0           |
| WV        | 0     | 0           | 0            | 0            | 0           |
| WI        | 100   | 0           | 0            | 0            | 100         |
| WY        | 0     | 0           | 0            | 0            | 0           |
| Mt & West | 300   | 0           | 0            | 0            | 300         |
| Midwest   | 500   | 0           | 0            | 100          | 400         |
| So & East | 600   | 0           | 100          | 0            | 500         |
| US        | 1,400 | 0           | 100          | 100          | 1,200       |

<sup>1/</sup> Totals may not add due to rounding.

Losses of Calves from Theft, by Class and Total,  
by State, Region and United States, 1991

| State     | Theft           |                |                 |       |       |
|-----------|-----------------|----------------|-----------------|-------|-------|
|           | Total<br>Calves | Beef<br>Calves | Dairy<br>Calves | Mixed | Other |
|           | Head            |                |                 |       |       |
| AL        | 100             | 100            |                 | 0     | 0     |
| AZ        | 100             | 100            |                 | 0     | 0     |
| AR        | 200             | 200            |                 | 0     | 0     |
| CA        | 1,200           | 300            | 800             | 100   | 0     |
| CO        | 400             | 400            |                 | 0     | 0     |
| CT        | 1/              | 0              |                 | 0     | 0     |
| DE        | 0               | 0              | 0               | 0     | 0     |
| FL        | 300             | 200            | 100             | 0     | 0     |
| GA        | 200             | 100            | 100             | 0     | 0     |
| HI        | 1/              |                | 0               | 0     | 0     |
| ID        | 500             | 500            |                 | 0     |       |
| IL        | 100             | 100            | 0               | 0     | 0     |
| IN        | 0               | 0              | 0               | 0     | 0     |
| IA        | 400             | 200            | 200             | 0     |       |
| KS        | 400             | 200            | 0               | 100   | 100   |
| KY        | 400             | 400            | 0               | 0     | 0     |
| LA        | 200             | 200            | 0               | 0     | 0     |
| ME        | 0               | 0              | 0               | 0     | 0     |
| MD        | 100             | 100            |                 | 0     | 0     |
| MA        | 1/              | 0              |                 | 0     | 0     |
| MI        | 0               | 0              | 0               | 0     | 0     |
| MN        | 200             | 100            |                 | 0     | 100   |
| MS        | 200             | 100            | 100             | 0     | 0     |
| MO        | 200             | 200            | 0               | 0     | 0     |
| MT        | 400             | 400            | 0               |       | 0     |
| NE        | 200             | 200            | 0               |       |       |
| NV        | 100             | 100            | 0               | 0     | 0     |
| NH        | 0               | 0              | 0               | 0     | 0     |
| NJ        | 0               | 0              | 0               | 0     | 0     |
| NM        | 300             | 200            | 100             | 0     | 0     |
| NY        | 200             | 0              | 200             | 0     | 0     |
| NC        | 100             | 100            | 0               |       | 0     |
| ND        | 500             | 500            | 0               | 0     | 0     |
| OH        | 100             | 100            |                 | 0     | 0     |
| OK        | 3,700           | 2,400          | 0               | 200   | 1,100 |
| OR        | 200             | 200            | 0               | 0     | 0     |
| PA        | 0               | 0              | 0               | 0     | 0     |
| RI        | 0               | 0              | 0               | 0     | 0     |
| SC        | 100             | 0              | 100             | 0     | 0     |
| SD        | 900             | 800            |                 | 0     | 100   |
| TN        | 900             | 800            | 0               | 100   | 0     |
| TX        | 1,500           | 1,300          | 100             |       | 100   |
| UT        | 200             | 200            |                 |       | 0     |
| VT        | 0               | 0              | 0               | 0     | 0     |
| VA        | 100             | 100            | 0               | 0     | 0     |
| WA        | 300             | 300            | 0               |       | 0     |
| WV        | 100             | 100            | 0               | 0     | 0     |
| WI        | 800             |                | 100             | 0     | 700   |
| WY        | 300             | 300            | 0               | 0     | 0     |
| Mt & West | 11,300          | 8,400          | 1,000           | 500   | 1,400 |
| Midwest   | 2,000           | 900            | 300             | 0     | 800   |
| So & East | 3,100           | 2,300          | 700             | 100   | 0     |
| US        | 16,400          | 11,600         | 2,000           | 600   | 2,200 |

1/ Less than 100 head for the State, but number is included in U.S. total.  
Totals may not add due to rounding.

Losses of Beef Calves from Theft, by Size Group,  
State, Region and United States, 1991 <sup>1/</sup>

| State     | Theft  |           |            |           |
|-----------|--------|-----------|------------|-----------|
|           | Beef   |           |            |           |
|           | Total  | 1-49 Head | 50-99 Head | 100+ Head |
|           | Head   |           |            |           |
| AL        | 100    | 100       | 0          | 0         |
| AZ        | 100    |           | 0          | 100       |
| AR        | 200    | 0         |            | 200       |
| CA        | 300    |           | 0          | 300       |
| CO        | 400    | 100       |            | 300       |
| CT        | 0      | 0         | 0          | 0         |
| DE        | 0      | 0         | 0          | 0         |
| FL        | 200    | 0         |            | 200       |
| GA        | 100    | 0         |            | 100       |
| HI        |        | 0         | 0          |           |
| ID        | 500    |           |            | 500       |
| IL        | 100    | 100       |            | 0         |
| IN        | 0      | 0         | 0          | 0         |
| IA        | 200    |           | 100        | 100       |
| KS        | 200    | 100       |            | 100       |
| KY        | 400    | 100       | 0          | 300       |
| LA        | 200    | 0         | 100        | 100       |
| ME        | 0      | 0         | 0          | 0         |
| MD        | 100    |           | 100        | 0         |
| MA        | 0      | 0         | 0          | 0         |
| MI        | 0      | 0         | 0          | 0         |
| MN        | 100    | 0         |            | 100       |
| MS        | 100    | 0         | 100        | 0         |
| MO        | 200    | 200       | 0          | 0         |
| MT        | 400    |           | 0          | 400       |
| NE        | 200    | 100       |            | 100       |
| NV        | 100    | 0         | 0          | 100       |
| NH        | 0      | 0         | 0          | 0         |
| NJ        | 0      | 0         | 0          | 0         |
| NM        | 200    | 100       |            | 100       |
| NY        | 0      | 0         | 0          | 0         |
| NC        | 100    | 100       |            |           |
| ND        | 500    |           | 100        | 400       |
| OH        | 100    | 100       |            | 0         |
| OK        | 2,400  | 300       | 500        | 1,600     |
| OR        | 200    |           | 100        | 100       |
| PA        | 0      | 0         | 0          | 0         |
| RI        | 0      | 0         | 0          | 0         |
| SC        | 0      | 0         | 0          | 0         |
| SD        | 800    | 0         |            | 800       |
| TN        | 800    | 400       | 200        | 200       |
| TX        | 1,300  | 800       | 100        | 400       |
| UT        | 200    |           |            | 200       |
| VT        | 0      | 0         | 0          | 0         |
| VA        | 100    |           | 0          | 100       |
| WA        | 300    | 0         | 0          | 300       |
| WV        | 100    |           | 0          | 100       |
| WI        |        |           | 0          | 0         |
| WY        | 300    |           | 0          | 300       |
| Mt & West | 8,400  | 1,500     | 800        | 6,100     |
| Midwest   | 900    | 400       | 100        | 400       |
| So & East | 2,300  | 700       | 500        | 1,100     |
| US        | 11,600 | 2,600     | 1,400      | 7,600     |

<sup>1/</sup> Totals may not add due to rounding.

Losses of Dairy Calves from Theft, by Size Group,  
State, Region and United States, 1991 <sup>1/</sup>

| State     | Theft |             |              |              |             |
|-----------|-------|-------------|--------------|--------------|-------------|
|           | Dairy |             |              |              |             |
|           | Total | : 1-29 Head | : 30-49 Head | : 50-99 Head | : 100+ Head |
|           | Head  |             |              |              |             |
| AL        |       | 0           | 0            | 0            |             |
| AZ        |       | 0           | 0            | 0            |             |
| AR        |       | 0           | 0            | 0            |             |
| CA        | 800   | 0           | 0            | 0            | 800         |
| CO        |       | 0           | 0            | 0            |             |
| CT        |       | 0           | 0            | 0            |             |
| DE        | 0     | 0           | 0            | 0            | 0           |
| FL        | 100   | 0           | 0            | 0            | 100         |
| GA        | 100   | 0           | 0            | 0            | 100         |
| HI        | 0     | 0           | 0            | 0            | 0           |
| ID        |       | 0           | 0            | 0            |             |
| IL        | 0     | 0           | 0            | 0            | 0           |
| IN        | 0     | 0           | 0            | 0            | 0           |
| IA        | 200   | 0           | 0            | 200          | 0           |
| KS        | 0     | 0           | 0            | 0            | 0           |
| KY        | 0     | 0           | 0            | 0            | 0           |
| LA        | 0     | 0           | 0            | 0            | 0           |
| ME        | 0     | 0           | 0            | 0            | 0           |
| MD        |       | 0           | 0            | 0            | 0           |
| MA        |       | 0           | 0            | 0            |             |
| MI        | 0     | 0           | 0            | 0            | 0           |
| MN        |       | 0           | 0            | 0            |             |
| MS        | 100   | 0           | 0            | 0            | 100         |
| MO        | 0     | 0           | 0            | 0            | 0           |
| MT        | 0     | 0           | 0            | 0            | 0           |
| NE        | 0     | 0           | 0            | 0            | 0           |
| NV        | 0     | 0           | 0            | 0            | 0           |
| NH        | 0     | 0           | 0            | 0            | 0           |
| NJ        | 0     | 0           | 0            | 0            | 0           |
| NM        | 100   | 0           | 0            | 0            | 100         |
| NY        | 200   | 0           | 0            | 0            | 200         |
| NC        | 0     | 0           | 0            | 0            | 0           |
| ND        | 0     | 0           | 0            | 0            | 0           |
| OH        |       |             |              |              |             |
| OK        | 0     | 0           | 0            | 0            | 0           |
| OR        | 0     | 0           | 0            | 0            | 0           |
| PA        | 0     | 0           | 0            | 0            | 0           |
| RI        | 0     | 0           | 0            | 0            | 0           |
| SC        | 100   | 0           | 0            | 0            | 100         |
| SD        |       | 0           | 0            | 0            |             |
| TN        | 0     | 0           | 0            | 0            | 0           |
| TX        | 100   | 0           | 0            | 0            | 100         |
| UT        |       | 0           | 0            | 0            |             |
| VT        | 0     | 0           | 0            | 0            | 0           |
| VA        | 0     | 0           | 0            | 0            | 0           |
| WA        | 0     | 0           | 0            | 0            | 0           |
| WV        | 0     | 0           | 0            | 0            | 0           |
| WI        | 100   | 0           | 0            | 0            | 100         |
| WY        | 0     | 0           | 0            | 0            | 0           |
| Mt & West | 1,000 | 0           | 0            | 0            | 1,000       |
| Midwest   | 300   | 0           | 0            | 200          | 100         |
| So & East | 700   | 0           | 0            | 0            | 700         |
| US        | 2,000 | 0           | 0            | 200          | 1,800       |

<sup>1/</sup> Totals may not add due to rounding.

Losses of Cattle from Other and Unknown Causes, by Class and Total,  
by State, Region and United States, 1991

| State     | Other and Unknown |                |                 |        |        |
|-----------|-------------------|----------------|-----------------|--------|--------|
|           | Total<br>Cattle   | Beef<br>Cattle | Dairy<br>Cattle | Mixed  | Other  |
|           | Head              |                |                 |        |        |
| AL        | 7,600             | 4,700          | 2,300           | 500    | 100    |
| AZ        | 5,200             | 2,600          | 2,100           | 100    | 400    |
| AR        | 7,900             | 5,500          | 1,700           | 600    | 100    |
| CA        | 28,400            | 7,900          | 12,300          | 1,200  | 7,000  |
| CO        | 10,000            | 2,000          | 1,200           | 100    | 6,700  |
| CT        | 1,000             |                | 1,000           |        |        |
| DE        | 600               |                | 500             |        | 100    |
| FL        | 10,200            | 7,100          | 2,700           | 300    | 100    |
| GA        | 13,100            | 5,000          | 7,600           | 500    |        |
| HI        | 1,600             | 1,200          | 300             |        | 100    |
| ID        | 10,800            | 3,500          | 3,000           | 100    | 4,200  |
| IL        | 5,600             | 2,500          | 1,100           | 200    | 1,800  |
| IN        | 5,700             | 3,400          | 1,700           | 200    | 400    |
| IA        | 14,000            | 5,700          | 1,600           | 400    | 6,300  |
| KS        | 9,200             | 3,300          | 500             | 300    | 5,100  |
| KY        | 16,500            | 8,200          | 5,600           | 1,600  | 1,100  |
| LA        | 6,300             | 3,200          | 2,800           | 300    | 0      |
| ME        | 700               | 100            | 600             |        | 0      |
| MD        | 1,500             | 200            | 1,200           | 100    |        |
| MA        | 500               |                | 500             |        | 0      |
| MI        | 6,300             | 400            | 3,600           |        | 2,300  |
| MN        | 14,000            | 2,900          | 6,200           | 500    | 4,400  |
| MS        | 8,100             | 4,800          | 2,800           | 300    | 200    |
| MO        | 23,500            | 13,600         | 5,400           | 2,600  | 1,900  |
| MT        | 9,400             | 8,500          | 200             | 500    | 200    |
| NE        | 9,400             | 4,400          | 300             | 100    | 4,600  |
| NV        | 3,600             | 2,600          | 900             | 100    |        |
| NH        | 500               |                | 500             |        |        |
| NJ        | 300               |                | 300             |        | 0      |
| NM        | 7,100             | 3,700          | 3,000           | 200    | 200    |
| NY        | 11,900            | 200            | 11,200          | 200    | 300    |
| NC        | 8,700             | 3,100          | 4,000           | 700    | 900    |
| ND        | 6,300             | 3,400          | 1,500           | 1,200  | 200    |
| OH        | 9,700             | 1,300          | 5,500           | 100    | 2,800  |
| OK        | 26,800            | 9,500          | 1,500           | 900    | 14,900 |
| OR        | 11,800            | 7,600          | 3,200           | 700    | 300    |
| PA        | 15,000            | 1,100          | 12,900          | 500    | 500    |
| RI        | 1/                | 0              |                 | 0      | 0      |
| SC        | 3,000             | 900            | 2,000           | 100    |        |
| SD        | 13,500            | 9,000          | 1,700           | 800    | 2,000  |
| TN        | 12,300            | 6,800          | 4,000           | 1,300  | 200    |
| TX        | 104,600           | 73,800         | 20,700          | 2,900  | 7,200  |
| UT        | 4,300             | 2,200          | 1,600           | 500    |        |
| VT        | 5,700             | 100            | 5,400           | 200    |        |
| VA        | 10,000            | 3,400          | 3,800           | 2,400  | 400    |
| WA        | 8,600             | 1,900          | 5,800           | 300    | 600    |
| WV        | 3,500             | 1,700          | 1,400           | 300    | 100    |
| WI        | 26,000            | 1,700          | 22,000          | 1,400  | 900    |
| WY        | 2,400             | 2,200          |                 | 100    | 100    |
| Mt & West | 273,000           | 149,300        | 59,800          | 10,100 | 53,800 |
| Midwest   | 112,700           | 37,000         | 48,800          | 6,000  | 20,900 |
| So & East | 137,000           | 50,600         | 73,100          | 9,300  | 4,000  |
| US        | 522,700           | 236,900        | 181,700         | 25,400 | 78,700 |

1/ Less than 100 head for the State, but number is included in U.S. total.  
Totals may not add due to rounding.



Losses of Beef Cattle from Other and Unknown Causes, by Size Group,  
State, Region and United States, 1991 <sup>1/</sup>

| State     | Other and Unknown |           |            |           |
|-----------|-------------------|-----------|------------|-----------|
|           | Beef              |           |            |           |
|           | Total             | 1-49 Head | 50-99 Head | 100+ Head |
|           | Head              |           |            |           |
| AL        | 4,700             | 1,200     | 800        | 2,700     |
| AZ        | 2,600             |           | 100        | 2,500     |
| AR        | 5,500             | 1,400     | 1,700      | 2,400     |
| CA        | 7,900             | 300       | 200        | 7,400     |
| CO        | 2,000             | 300       | 100        | 1,600     |
| CT        |                   |           | 0          | 0         |
| DE        |                   | 0         |            |           |
| FL        | 7,100             | 200       | 100        | 6,800     |
| GA        | 5,000             | 1,400     | 1,100      | 2,500     |
| HI        | 1,200             |           |            | 1,200     |
| ID        | 3,500             | 200       | 300        | 3,000     |
| IL        | 2,500             | 1,200     | 600        | 700       |
| IN        | 3,400             | 400       | 200        | 2,800     |
| IA        | 5,700             | 2,200     | 1,700      | 1,800     |
| KS        | 3,300             | 800       | 600        | 1,900     |
| KY        | 8,200             | 4,200     | 2,100      | 1,900     |
| LA        | 3,200             | 500       | 700        | 2,000     |
| ME        | 100               |           | 100        |           |
| MD        | 200               | 100       |            | 100       |
| MA        |                   |           |            |           |
| MI        | 400               | 200       | 100        | 100       |
| MN        | 2,900             | 1,200     | 1,000      | 700       |
| MS        | 4,800             | 1,200     | 1,200      | 2,400     |
| MO        | 13,600            | 3,700     | 2,800      | 7,100     |
| MT        | 8,500             | 300       | 700        | 7,500     |
| NE        | 4,400             | 900       | 300        | 3,200     |
| NV        | 2,600             |           | 100        | 2,500     |
| NH        |                   |           | 0          | 0         |
| NJ        |                   |           |            | 0         |
| NM        | 3,700             | 300       | 300        | 3,100     |
| NY        | 200               | 200       |            |           |
| NC        | 3,100             | 900       | 400        | 1,800     |
| ND        | 3,400             | 500       | 1,000      | 1,900     |
| OH        | 1,300             | 800       | 100        | 400       |
| OK        | 9,500             | 2,200     | 2,400      | 4,900     |
| OR        | 7,600             | 400       | 200        | 7,000     |
| PA        | 1,100             | 600       | 100        | 400       |
| RI        | 0                 | 0         | 0          | 0         |
| SC        | 900               | 400       | 100        | 400       |
| SD        | 9,000             | 1,600     | 1,800      | 5,600     |
| TN        | 6,800             | 2,900     | 1,900      | 2,000     |
| TX        | 73,800            | 3,600     | 4,800      | 65,400    |
| UT        | 2,200             | 200       | 300        | 1,700     |
| VT        | 100               | 100       |            |           |
| VA        | 3,400             | 700       | 1,100      | 1,600     |
| WA        | 1,900             | 300       | 100        | 1,500     |
| WV        | 1,700             | 600       | 400        | 700       |
| WI        | 1,700             | 600       | 300        | 800       |
| WY        | 2,200             | 100       | 200        | 1,900     |
| Mt & West | 149,300           | 12,000    | 13,500     | 123,800   |
| Midwest   | 37,000            | 11,700    | 8,500      | 16,800    |
| So & East | 50,600            | 15,200    | 10,100     | 25,300    |
| US        | 236,900           | 38,900    | 32,100     | 165,900   |

<sup>1/</sup> Totals may not add due to rounding.

Losses of Dairy Cattle from Other and Unknown Causes, by Size Group,  
State, Region and United States, 1991 <sup>1/</sup>

| State     | Other and Unknown |           |            |            |           |
|-----------|-------------------|-----------|------------|------------|-----------|
|           | Dairy             |           |            |            |           |
|           | Total             | 1-29 Head | 30-49 Head | 50-99 Head | 100+ Head |
|           | Head              |           |            |            |           |
| AL        | 2,300             |           | 0          | 200        | 2,100     |
| AZ        | 2,100             | 0         | 0          | 0          | 2,100     |
| AR        | 1,700             |           |            | 900        | 800       |
| CA        | 12,300            | 0         |            |            | 12,300    |
| CO        | 1,200             |           |            | 100        | 1,100     |
| CT        | 1,000             |           | 0          | 100        | 900       |
| DE        | 500               |           | 0          |            | 500       |
| FL        | 2,700             | 0         |            | 100        | 2,600     |
| GA        | 7,600             | 0         |            | 400        | 7,200     |
| HI        | 300               | 0         | 0          | 0          | 300       |
| ID        | 3,000             |           | 100        | 300        | 2,600     |
| IL        | 1,100             |           | 200        | 400        | 500       |
| IN        | 1,700             |           | 300        | 700        | 700       |
| IA        | 1,600             | 200       | 300        | 500        | 600       |
| KS        | 500               |           |            | 200        | 300       |
| KY        | 5,600             | 300       | 700        | 1,500      | 3,100     |
| LA        | 2,800             |           |            | 500        | 2,300     |
| ME        | 600               |           |            | 200        | 400       |
| MD        | 1,200             | 0         | 100        | 200        | 900       |
| MA        | 500               |           |            | 200        | 300       |
| MI        | 3,600             | 200       | 400        | 1,200      | 1,800     |
| MN        | 6,200             | 300       | 1,400      | 2,000      | 2,500     |
| MS        | 2,800             | 100       |            | 600        | 2,100     |
| MO        | 5,400             | 200       | 400        | 1,900      | 2,900     |
| MT        | 200               |           | 0          |            | 200       |
| NE        | 300               |           |            | 200        | 100       |
| NV        | 900               |           | 0          |            | 900       |
| NH        | 500               |           |            | 100        | 400       |
| NJ        | 300               |           |            | 100        | 200       |
| NM        | 3,000             | 0         | 0          |            | 3,000     |
| NY        | 11,200            | 100       | 600        | 3,300      | 7,200     |
| NC        | 4,000             | 0         | 100        | 700        | 3,200     |
| ND        | 1,500             | 0         | 200        | 800        | 500       |
| OH        | 5,500             | 300       | 300        | 1,300      | 3,600     |
| OK        | 1,500             |           | 100        | 200        | 1,200     |
| OR        | 3,200             |           |            | 300        | 2,900     |
| PA        | 12,900            | 400       | 1,500      | 4,000      | 7,000     |
| RI        | 0                 |           |            |            | 0         |
| SC        | 2,000             | 0         | 0          | 100        | 1,900     |
| SD        | 1,700             | 100       | 200        | 300        | 1,100     |
| TN        | 4,000             | 100       | 200        | 800        | 2,900     |
| TX        | 20,700            |           | 400        | 500        | 19,800    |
| UT        | 1,600             | 0         |            | 200        | 1,400     |
| VT        | 5,400             |           | 900        | 1,100      | 3,400     |
| VA        | 3,800             |           | 100        | 600        | 3,100     |
| WA        | 5,800             |           | 0          | 300        | 5,500     |
| WV        | 1,400             | 0         |            | 200        | 1,200     |
| WI        | 22,000            | 1,300     | 3,600      | 9,100      | 8,000     |
| WY        |                   |           | 0          |            |           |
| Mt & West | 59,800            | 100       | 1,000      | 3,400      | 55,300    |
| Midwest   | 48,800            | 2,500     | 6,900      | 18,000     | 21,400    |
| So & East | 73,100            | 1,000     | 4,200      | 15,000     | 52,900    |
| US        | 181,700           | 3,600     | 12,100     | 36,400     | 129,600   |

<sup>1/</sup> Totals may not add due to rounding.

Losses of Calves from Other and Unknown Causes, by Class  
and Total, by State, Region and United States, 1991 <sup>1/</sup>

| State     | Other and Unknown |                |                 |        |        |
|-----------|-------------------|----------------|-----------------|--------|--------|
|           | Total<br>Calves   | Beef<br>Calves | Dairy<br>Calves | Mixed  | Other  |
|           | Head              |                |                 |        |        |
| AL        | 6,700             | 4,900          | 1,700           |        | 100    |
| AZ        | 3,000             | 300            | 200             |        | 2,500  |
| AR        | 5,100             | 3,900          | 700             | 300    | 200    |
| CA        | 38,000            | 4,600          | 17,300          | 900    | 15,200 |
| CO        | 12,400            | 10,200         | 1,100           | 800    | 300    |
| CT        | 400               |                | 400             |        |        |
| DE        | 400               |                | 400             |        |        |
| FL        | 14,000            | 7,800          | 4,100           | 2,000  | 100    |
| GA        | 9,600             | 5,300          | 3,900           | 300    | 100    |
| HI        | 1,800             | 900            | 400             | 500    |        |
| ID        | 10,900            | 5,200          | 5,200           | 100    | 400    |
| IL        | 8,200             | 4,300          | 2,900           | 600    | 400    |
| IN        | 6,200             | 3,400          | 1,700           | 0      | 1,100  |
| IA        | 12,000            | 7,100          | 3,100           | 1,000  | 800    |
| KS        | 5,500             | 4,500          | 500             |        | 500    |
| KY        | 23,300            | 15,300         | 5,900           | 1,400  | 700    |
| LA        | 5,100             | 3,000          | 1,800           | 300    |        |
| ME        | 900               | 200            | 600             | 100    |        |
| MD        | 900               | 200            | 500             | 200    |        |
| MA        | 300               |                | 300             |        |        |
| MI        | 7,200             | 800            | 6,200           | 100    | 100    |
| MN        | 14,700            | 5,200          | 6,700           | 1,000  | 1,800  |
| MS        | 4,500             | 3,000          | 1,200           | 100    | 200    |
| MO        | 20,900            | 16,200         | 2,900           | 1,200  | 600    |
| MT        | 9,300             | 7,500          |                 | 300    | 1,500  |
| NE        | 3,900             | 3,200          | 100             | 300    | 300    |
| NV        | 6,500             | 5,500          | 1,000           | 0      |        |
| NH        | 300               |                | 300             |        |        |
| NJ        | 100               |                | 100             | 0      | 0      |
| NM        | 7,800             | 3,900          | 3,800           | 100    |        |
| NY        | 15,400            | 1,000          | 13,500          | 500    | 400    |
| NC        | 7,200             | 3,300          | 3,800           | 100    |        |
| ND        | 4,600             | 3,800          | 300             | 400    | 100    |
| OH        | 4,700             | 1,000          | 2,200           | 100    | 1,400  |
| OK        | 24,700            | 20,400         | 2,700           | 400    | 1,200  |
| OR        | 11,500            | 9,500          | 1,800           | 100    | 100    |
| PA        | 15,900            | 2,200          | 7,300           | 300    | 6,100  |
| RI        | 100               |                | 100             | 0      | 0      |
| SC        | 2,400             | 1,200          | 1,000           | 200    | 0      |
| SD        | 10,200            | 7,900          | 1,600           | 500    | 200    |
| TN        | 13,900            | 9,800          | 3,100           | 800    | 200    |
| TX        | 73,900            | 48,000         | 22,200          | 1,600  | 2,100  |
| UT        | 5,200             | 3,500          | 1,200           | 400    | 100    |
| VT        | 3,700             | 200            | 3,500           | 0      | 0      |
| VA        | 8,900             | 5,600          | 2,300           | 900    | 100    |
| WA        | 4,900             | 1,600          | 3,000           | 200    | 100    |
| WV        | 2,000             | 1,700          | 100             | 100    | 100    |
| WI        | 35,400            | 2,100          | 14,600          | 700    | 18,000 |
| WY        | 800               | 700            |                 | 100    | 0      |
| Mt & West | 234,900           | 141,200        | 62,400          | 6,700  | 24,600 |
| Midwest   | 114,400           | 44,000         | 41,000          | 5,000  | 24,400 |
| So & East | 136,000           | 64,700         | 55,900          | 7,300  | 8,100  |
| US        | 485,300           | 249,900        | 159,300         | 19,000 | 57,100 |

<sup>1/</sup> Totals may not add due to rounding.

Losses of Beef Calves from Other and Unknown Causes,  
by Size Group, State, Region and United States, 1991 <sup>1/</sup>

| State     | Other and Unknown |           |            |           |
|-----------|-------------------|-----------|------------|-----------|
|           | Beef              |           |            |           |
|           | Total             | 1-49 Head | 50-99 Head | 100+ Head |
|           | Head              |           |            |           |
| AL        | 4,900             | 1,400     | 1,100      | 2,400     |
| AZ        | 300               |           |            | 300       |
| AR        | 3,900             | 1,700     | 1,000      | 1,200     |
| CA        | 4,600             | 200       | 300        | 4,100     |
| CO        | 10,200            | 300       | 600        | 9,300     |
| CT        |                   |           | 0          | 0         |
| DE        |                   |           | 0          | 0         |
| FL        | 7,800             | 200       | 300        | 7,300     |
| GA        | 5,300             | 1,600     | 900        | 2,800     |
| HI        | 900               |           |            | 900       |
| ID        | 5,200             | 300       | 500        | 4,400     |
| IL        | 4,300             | 2,200     | 800        | 1,300     |
| IN        | 3,400             | 700       | 200        | 2,500     |
| IA        | 7,100             | 3,100     | 2,200      | 1,800     |
| KS        | 4,500             | 900       | 800        | 2,800     |
| KY        | 15,300            | 7,100     | 3,600      | 4,600     |
| LA        | 3,000             | 600       | 500        | 1,900     |
| ME        | 200               | 100       | 100        |           |
| MD        | 200               | 200       |            |           |
| MA        |                   |           | 0          | 0         |
| MI        | 800               | 600       | 200        | 0         |
| MN        | 5,200             | 2,900     | 900        | 1,400     |
| MS        | 3,000             | 800       | 500        | 1,700     |
| MO        | 16,200            | 4,700     | 3,900      | 7,600     |
| MT        | 7,500             | 200       | 500        | 6,800     |
| NE        | 3,200             | 1,000     | 400        | 1,800     |
| NV        | 5,500             | 100       |            | 5,400     |
| NH        |                   |           |            | 0         |
| NJ        |                   |           | 0          | 0         |
| NM        | 3,900             | 300       | 300        | 3,300     |
| NY        | 1,000             | 200       | 800        |           |
| NC        | 3,300             | 1,400     | 600        | 1,300     |
| ND        | 3,800             | 700       | 800        | 2,300     |
| OH        | 1,000             | 700       | 0          | 300       |
| OK        | 20,400            | 5,600     | 4,500      | 10,300    |
| OR        | 9,500             | 600       | 200        | 8,700     |
| PA        | 2,200             | 1,100     | 100        | 1,000     |
| RI        |                   |           | 0          | 0         |
| SC        | 1,200             | 400       | 300        | 500       |
| SD        | 7,900             | 1,100     | 1,400      | 5,400     |
| TN        | 9,800             | 5,500     | 2,400      | 1,900     |
| TX        | 48,000            | 3,900     | 4,300      | 39,800    |
| UT        | 3,500             | 600       | 500        | 2,400     |
| VT        | 200               |           |            | 200       |
| VA        | 5,600             | 1,800     | 1,100      | 2,700     |
| WA        | 1,600             | 200       | 100        | 1,300     |
| WV        | 1,700             | 1,000     | 200        | 500       |
| WI        | 2,100             | 800       | 200        | 1,100     |
| WY        | 700               | 100       | 100        | 500       |
| Mt & West | 141,200           | 16,100    | 15,300     | 109,800   |
| Midwest   | 44,000            | 17,400    | 9,400      | 17,200    |
| So & East | 64,700            | 23,400    | 12,500     | 28,800    |
| US        | 249,900           | 56,900    | 37,200     | 155,800   |

<sup>1/</sup> Totals may not add due to rounding.

Losses of Dairy Calves from Other and Unknown Causes,  
by Size Group, State, Region and United States, 1991 <sup>1/</sup>

| State      | Other and Unknown |           |            |            |           |
|------------|-------------------|-----------|------------|------------|-----------|
|            | Dairy             |           |            |            |           |
|            | Total             | 1-29 Head | 30-49 Head | 50-99 Head | 100+ Head |
|            | Head              |           |            |            |           |
| AL         | 1,700             |           | 0          | 100        | 1,600     |
| AZ         | 200               | 0         | 0          | 0          | 200       |
| AR         | 700               | 0         | 100        |            | 600       |
| CA         | 17,300            | 0         | 0          |            | 17,300    |
| CO         | 1,100             | 100       | 0          |            | 1,000     |
| CT         | 400               |           | 0          | 100        | 300       |
| DE         | 400               | 0         | 0          |            | 400       |
| FL         | 4,100             | 0         | 0          | 100        | 4,000     |
| GA         | 3,900             | 0         | 0          | 200        | 3,700     |
| HI         | 400               | 0         | 0          | 0          | 400       |
| ID         | 5,200             | 100       | 100        | 300        | 4,700     |
| IL         | 2,900             |           | 100        | 1,000      | 1,800     |
| IN         | 1,700             | 100       | 100        | 600        | 900       |
| IA         | 3,100             | 200       | 900        | 800        | 1,200     |
| KS         | 500               |           |            | 100        | 400       |
| KY         | 5,900             | 300       | 900        | 1,700      | 3,000     |
| LA         | 1,800             | 0         |            | 300        | 1,500     |
| ME         | 600               |           |            | 100        | 500       |
| MD         | 500               |           |            |            | 500       |
| MA         | 300               |           |            | 200        | 100       |
| MI         | 6,200             | 100       | 200        | 900        | 5,000     |
| MN         | 6,700             | 800       | 1,400      | 2,000      | 2,500     |
| MS         | 1,200             |           | 100        | 200        | 900       |
| MO         | 2,900             | 400       | 300        | 1,300      | 900       |
| MT         |                   | 0         | 0          | 0          |           |
| NE         | 100               | 0         | 0          |            | 100       |
| NV         | 1,000             | 0         | 0          | 0          | 1,000     |
| NH         | 300               |           | 100        | 100        | 100       |
| NJ         | 100               | 0         |            |            | 100       |
| NM         | 3,800             |           | 0          | 100        | 3,700     |
| NY         | 13,500            | 100       | 900        | 4,400      | 8,100     |
| NC         | 3,800             | 0         | 0          | 200        | 3,600     |
| ND         | 300               |           |            |            | 300       |
| OH         | 2,200             | 100       | 200        | 1,000      | 900       |
| OK         | 2,700             | 0         | 0          | 200        | 2,500     |
| OR         | 1,800             |           |            | 200        | 1,600     |
| PA         | 7,300             | 300       | 1,400      | 2,000      | 3,600     |
| RI         | 100               |           |            |            | 100       |
| SC         | 1,000             | 0         | 0          | 0          | 1,000     |
| SD         | 1,600             | 100       | 300        | 200        | 1,000     |
| TN         | 3,100             | 200       | 200        | 400        | 2,300     |
| TX         | 22,200            | 100       | 100        | 300        | 21,700    |
| UT         | 1,200             | 0         |            | 400        | 800       |
| VT         | 3,500             | 100       | 600        | 600        | 2,200     |
| VA         | 2,300             | 0         | 200        | 1,000      | 1,100     |
| WA         | 3,000             | 1,000     |            | 100        | 1,900     |
| WV         | 100               | 0         | 0          | 100        |           |
| WI         | 14,600            | 800       | 2,900      | 4,500      | 6,400     |
| WY         |                   |           | 0          | 0          |           |
| Mt. & West | 62,400            | 1,400     | 500        | 1,900      | 58,600    |
| Midwest    | 41,000            | 2,500     | 6,200      | 12,100     | 20,200    |
| So & East  | 55,900            | 1,000     | 4,400      | 11,800     | 38,700    |
| US         | 159,300           | 4,900     | 11,100     | 25,800     | 117,500   |

<sup>1/</sup> Totals may not add due to rounding.

**Losses of Cattle and Calves from Coyotes and Dogs,  
By State, Region and United States, 1991**

| State     | Coyotes |        | Dogs   |        |
|-----------|---------|--------|--------|--------|
|           | Cattle  | Calves | Cattle | Calves |
|           | Head    |        |        |        |
| AL        | 100     | 1,600  | 100    | 500    |
| AZ        | 1,300   | 1,900  | 1/     | 100    |
| AR        | 1/      | 300    | 1/     | 900    |
| CA        | 200     | 2,600  | 200    | 1,000  |
| CO        | 100     | 2,500  | 0      | 200    |
| CT        | 0       | 1/     | 0      | 0      |
| DE        | 0       | 0      | 0      | 0      |
| FL        | 1/      | 200    | 200    | 500    |
| GA        | 100     | 600    | 200    | 600    |
| HI        | 0       | 0      | 0      | 200    |
| ID        | 1/      | 900    | 0      | 1/     |
| IL        | 0       | 1,400  | 0      | 200    |
| IN        | 1/      | 400    | 1/     | 1/     |
| IA        | 200     | 1,200  | 1/     | 100    |
| KS        | 100     | 800    | 1/     | 100    |
| KY        | 100     | 1,800  | 100    | 1,400  |
| LA        | 100     | 1,200  | 0      | 100    |
| ME        | 0       | 1/     | 0      | 0      |
| MD        | 0       | 0      | 0      | 0      |
| MA        | 1/      | 1/     | 0      | 0      |
| MI        | 0       | 0      | 1/     | 100    |
| MN        | 0       | 400    | 1/     | 100    |
| MS        | 1/      | 1,300  | 1/     | 200    |
| MO        | 200     | 1,000  | 200    | 600    |
| MT        | 1/      | 1,200  | 1/     | 100    |
| NE        | 100     | 1,700  | 1/     | 1/     |
| NV        | 1/      | 1,500  | 0      | 100    |
| NH        | 0       | 1/     | 0      | 0      |
| NJ        | 0       | 0      | 0      | 0      |
| NM        | 200     | 1,000  | 0      | 100    |
| NY        | 1/      | 200    | 0      | 0      |
| NC        | 0       | 0      | 200    | 600    |
| ND        | 100     | 1,300  | 0      | 0      |
| OH        | 0       | 1/     | 0      | 1/     |
| OK        | 1,300   | 4,000  | 200    | 2,300  |
| OR        | 1/      | 4,000  | 1/     | 100    |
| PA        | 0       | 1/     | 0      | 100    |
| RI        | 0       | 0      | 0      | 0      |
| SC        | 0       | 0      | 0      | 600    |
| SD        | 100     | 3,500  | 1/     | 200    |
| TN        | 0       | 1,400  | 300    | 2,100  |
| TX        | 1,000   | 16,200 | 300    | 2,300  |
| UT        | 1/      | 800    | 0      | 1/     |
| VT        | 1/      | 200    | 1/     | 0      |
| VA        | 0       | 700    | 200    | 800    |
| WA        | 100     | 700    | 1/     | 100    |
| WV        | 0       | 1/     | 1/     | 100    |
| WI        | 0       | 300    | 0      | 100    |
| WY        | 1/      | 1,000  | 1/     | 1/     |
| Mt & West | 4,900   | 45,600 | 900    | 7,000  |
| Midwest   | 400     | 5,000  | 500    | 2,200  |
| So & East | 600     | 9,400  | 1,400  | 7,600  |
| US        | 5,900   | 60,000 | 2,800  | 16,800 |

1/ Less than 100 head for the region but number is included in U.S. total.  
Totals may not add due to rounding.

Losses of Cattle and Calves from Mountain Lions and Bobcats,  
by Selected States, Region, and United States, 1991

| State     | Mountain Lions and Bobcats |   |            |
|-----------|----------------------------|---|------------|
|           |                            |   |            |
|           | Cattle                     | : | Calves     |
| AZ        | 200                        |   | 1,200      |
| CA        | 400                        |   | 600        |
| CO        | <u>1</u> /                 |   | 100        |
| ID        | <u>1</u> /                 |   | 100        |
| KS        | <u>1</u> /                 |   | 100        |
| MO        | 0                          |   | <u>1</u> / |
| MT        | 100                        |   | 200        |
| NM        | 0                          |   | 200        |
| OK        | 0                          |   | 100        |
| OR        | 0                          |   | 300        |
| TX        | 800                        |   | 1,700      |
| UT        | <u>1</u> /                 |   | <u>1</u> / |
| WA        | <u>1</u> /                 |   | 0          |
| WY        | 100                        |   | 100        |
| Mt & West | 1,600                      |   | 4,700      |
| Midwest   | 0                          |   | <u>1</u> / |
| So & East | 0                          |   | 0          |
| US        | 1,600                      |   | 4,700      |

1/ Less than 100 head for the State, but number is included in U.S. total.  
Totals may not add due to rounding.

Losses of Cattle and Calves from Bears and Wolves,  
By Region and United States, 1991

| State     | : | Bears  |   | :      | Wolves |                 |
|-----------|---|--------|---|--------|--------|-----------------|
|           | : |        |   |        |        |                 |
|           | : | Cattle | : | Calves | :      | Cattle & Calves |
| Mt & West | : | 900    |   | 900    |        | 1,400           |
| Midwest   | : | 0      |   | 100    |        | 300             |
| So & East | : | 0      |   | 0      |        | <u>1</u> /      |
| US        | : | 900    |   | 1,000  |        | 1,800           |

1/ Less than 100 head for the region but number is included in U.S. total.  
Totals may not add due to rounding.

Losses of Cattle and Calves from Other Predators,  
By State, Region and United States, 1991

| State     | All Other Predators |        |
|-----------|---------------------|--------|
|           | Cattle              | Calves |
| AL        | 100                 | 0      |
| AZ        | 1/                  | 1/     |
| AR        | 200                 | 200    |
| CA        | 300                 | 1/     |
| CO        | 1/                  | 1/     |
| CT        | 0                   | 0      |
| DE        | 1/                  | 1/     |
| FL        | 100                 | 200    |
| GA        | 100                 | 100    |
| HI        | 1/                  | 1/     |
| ID        | 1/                  | 100    |
| IL        | 200                 | 200    |
| IN        | 1/                  | 1/     |
| IA        | 1/                  | 300    |
| KS        | 1/                  | 100    |
| KY        | 100                 | 100    |
| LA        | 1/                  | 100    |
| ME        | 1/                  | 0      |
| MD        | 100                 | 0      |
| MA        | 0                   | 1/     |
| MI        | 1/                  | 0      |
| MN        | 1/                  | 500    |
| MS        | 200                 | 100    |
| MO        | 100                 | 100    |
| MT        | 1/                  | 100    |
| NE        | 1/                  | 1/     |
| NV        | 1/                  | 0      |
| NH        | 0                   | 0      |
| NJ        | 1/                  | 0      |
| NM        | 0                   | 1/     |
| NY        | 0                   | 0      |
| NC        | 100                 | 100    |
| ND        | 100                 | 100    |
| OH        | 0                   | 0      |
| OK        | 300                 | 500    |
| OR        | 100                 | 1/     |
| PA        | 100                 | 1/     |
| RI        | 0                   | 0      |
| SC        | 0                   | 0      |
| SD        | 100                 | 0      |
| TN        | 100                 | 600    |
| TX        | 900                 | 2,100  |
| UT        | 0                   | 1/     |
| VT        | 1/                  | 0      |
| VA        | 600                 | 100    |
| WA        | 1/                  | 0      |
| WV        | 1/                  | 1/     |
| WI        | 0                   | 0      |
| WY        | 0                   | 1/     |
| Mt & West | 2,200               | 3,500  |
| Midwest   | 600                 | 1,300  |
| So & East | 1,800               | 1,500  |
| US        | 4,600               | 6,300  |

1/ Less than 100 head for the State, but number is included in U.S. total.  
Totals may not add due to rounding.



## Reliability of Cattle and Calf Death Loss Estimates

**Survey Procedures:** A random sample of U.S. producers was surveyed to provide data for these estimates. Survey procedures ensured that all cattle producers, regardless of size, had a chance to be included in the survey to collect death loss by cause. Large producers were sampled more heavily than small operations. Data were collected from about 77,000 operators during the first half of January by mail, telephone, and face-to-face personal interviews. Regardless of when operators responded, they were asked to report death losses for cattle and calves for the 1991 calendar year.

Based on the original data collected during January, a report titled Cattle and Calves Death Loss was issued in May 1992. This report contained data for death loss by cause including predator losses and losses from other causes. These estimates were on a State and Regional level.

Data in the above mentioned report as well as an additional summary from the original data provided data for this report. The original data was resummarized to break the losses out by class and size group. The classes included beef cattle, dairy cattle, mixed and other cattle operations. These classes are further defined in the following terms and definitions section. Size groups included 1-49 head, 50-99 head and 100+ head for beef cattle and 1-29 head, 30-49 head, 50-99 head and 100+ head for dairy cattle. No size group breakdowns are included for other or mixed operations.

**Estimating Procedures:** These estimates of total death losses and death loss by cause were prepared by the Livestock, Dairy and Poultry Branch, NASS. Total cattle and calf death losses from all causes were published in the 1991 Meat Animals Production, Disposition, and Income report, released April 13, 1992. Breakdowns by cause of loss and value of loss were published in the Cattle and Calves Death Loss report issued in May 1992. Class estimates for this report were compiled by using the unexpanded percent each class was of the total loss by cause. This percent was then applied to the total death loss published in the May 1992 report. Once the beef and dairy totals were derived, the same procedure was used to estimate size groups within each of these two classes. All published loss estimates were rounded to the nearest 100 head. State estimates of less than 100 head are not published, but are included in U.S. totals. Throughout the report, a blank entry indicates that some deaths were reported for that category but the number is less than 50 head. A zero indicates no deaths were reported for that category. This does not imply that there were no deaths, simply that none were reported for this survey. The sample used for this report was not specifically selected to derive the breakdowns within. However, the estimates in this report should be a good indication of where the death losses occur and which classes and/or size groups are most impacted from the various death loss causes. States were combined into regions when sampling variability did not permit individual State data to be released.

**Reliability:** Since all cattle operators are not included in the sample, survey estimates are subject to sampling variability. Survey results are also subject to non-sampling errors such as omissions, duplications, and mistakes in reporting, recording, and processing the data. The effects of these non-sampling errors cannot be measured directly. They are minimized through rigid quality controls in the data collection process and through a careful review of all reported data for consistency and reasonableness.

## **Terms and Definitions:**

### **Beef**

**Cattle:** On individual questionnaires, if beef cows were greater than milk cows and milk cows were less than 5 head, the operation was classified in this report as a beef cattle operation.

**Cattle:** Includes all cows, bulls, steers, and heifers weighing over 500 pounds. This includes beef and milk breeds as well as cattle on feed.

**Calves:** Beef and milk breed steers, heifers, and bulls weighing less than 500 pounds.

### **Dairy**

**Cattle:** On individual questionnaires, if milk cows were greater than beef cows and beef cows were less than 5 head, the operation was classified in this report as a dairy cattle operation.

**Mixed:** On individual questionnaires, if beef cows were greater than 5 head and milk cows were greater than 5 head, the operation was classified in this report as a mixed operation.

**Other:** On individual questionnaires, if an operation did not meet the criteria for a beef cattle, dairy cattle, or mixed operation, the operation was classified in this report as other.

**Regions: Mountain and Western:**

|            |            |              |            |
|------------|------------|--------------|------------|
| Arizona    | Kansas     | North Dakota | Texas      |
| California | Montana    | Oklahoma     | Utah       |
| Colorado   | Nebraska   | Oregon       | Washington |
| Hawaii     | Nevada     | South Dakota | Wyoming    |
| Idaho      | New Mexico |              |            |

**Midwest:**

|          |          |           |           |
|----------|----------|-----------|-----------|
| Arkansas | Iowa     | Minnesota | Ohio      |
| Illinois | Michigan | Missouri  | Wisconsin |
| Indiana  |          |           |           |

**Southern and Eastern:**

|             |               |                |               |
|-------------|---------------|----------------|---------------|
| Alabama     | Louisiana     | New Jersey     | Tennessee     |
| Connecticut | Maine         | New York       | Vermont       |
| Delaware    | Maryland      | North Carolina | Virginia      |
| Florida     | Massachusetts | Pennsylvania   | West Virginia |
| Georgia     | Mississippi   | Rhode Island   |               |
| Kentucky    | New Hampshire | South Carolina |               |

**Digestive Problems:** Includes bloat, scours, parasites, etc.

**Respiratory Problems:** Includes shipping fever, pneumonia, etc.

**Poison:** Includes nitrate poisoning and noxious feeds or weeds.

**Mountain Lions and Bobcats:** Includes cougars, pumas and lynx.

## Index

|                                                                                                    | Page |
|----------------------------------------------------------------------------------------------------|------|
| Losses of Beef Calves from All Causes,<br>by Size Group, State, Region and U.S. ....               | 7    |
| Losses of Beef Calves from Calving Problems,<br>by Size Group, State, Region and U.S. ....         | 25   |
| Losses of Beef Calves from Digestive Problems,<br>by Size Group, State, Region and U.S. ....       | 13   |
| Losses of Beef Calves from Other and Unknown<br>Causes, by Size Group, State, Region and U.S. .... | 49   |
| Losses of Beef Calves from Poison, by Size<br>Group, State, Region and U.S. ....                   | 37   |
| Losses of Beef Calves from Respiratory Problems,<br>by Size Group, State, Region and U.S. ....     | 19   |
| Losses of Beef Calves from Theft, by Size<br>Group, State, Region and U.S. ....                    | 43   |
| Losses of Beef Calves from Weather, by Size<br>Group, State, Region and U.S. ....                  | 31   |
| Losses of Beef Cattle from All Causes,<br>by Size Group, State, Region and U.S. ....               | 4    |
| Losses of Beef Cattle from Calving Problems,<br>by Size Group, State, Region and U.S. ....         | 22   |
| Losses of Beef Cattle from Digestive Problems,<br>by Size Group, State, Region and U.S. ....       | 10   |
| Losses of Beef Cattle from Other and Unknown<br>Causes, by Size Group, State, Region and U.S. .... | 46   |
| Losses of Beef Cattle from Poison, by Size<br>Group, State, Region and U.S. ....                   | 34   |
| Losses of Beef Cattle from Respiratory Problems,<br>by Size Group, State, Region and U.S. ....     | 16   |
| Losses of Beef Cattle from Theft, by Size<br>Group, State, Region and U.S. ....                    | 40   |
| Losses of Beef Cattle from Weather, by Size<br>Group, State, Region and U.S. ....                  | 28   |
| Losses of Calves from All Causes,<br>by Size Group, State, Region and U.S. ....                    | 6    |

-- continued

## Index (continued)

|                                                                                                                 | Page |
|-----------------------------------------------------------------------------------------------------------------|------|
| Losses of Calves from Calving Problems,<br>by Size Group, State, Region and U.S. ....                           | 24   |
| Losses of Calves from Digestive Problems,<br>by Size Group, State, Region and U.S. ....                         | 12   |
| Losses of Calves from Other and Unknown<br>Causes, by Size Group, State, Region and U.S. ....                   | 48   |
| Losses of Calves from Poison, by Size<br>Group, State, Region and U.S. ....                                     | 36   |
| Losses of Calves from Respiratory Problems,<br>by Size Group, State, Region and U.S. ....                       | 18   |
| Losses of Calves from Theft, by Size<br>Group, State, Region and U.S. ....                                      | 42   |
| Losses of Calves from Weather, by Size<br>Group, State, Region and U.S. ....                                    | 30   |
| Losses of Cattle and Calves from Coyotes and<br>Dogs, by State, Region and U.S. ....                            | 51   |
| Losses of Cattle and Calves from Mountain Lions,<br>Bobcats, Bears, and Wolves, by State, Region, and U.S. .... | 52   |
| Losses of Cattle and Calves from Other Predators,<br>by State, Region and U.S. ....                             | 53   |
| Losses of Cattle from All Causes,<br>by Size Group, State, Region and U.S. ....                                 | 3    |
| Losses of Cattle from Calving Problems,<br>by Size Group, State, Region and U.S. ....                           | 21   |
| Losses of Cattle from Digestive Problems,<br>by Size Group, State, Region and U.S. ....                         | 9    |
| Losses of Cattle from Other and Unknown<br>Causes, by Size Group, State, Region and U.S. ....                   | 45   |
| Losses of Cattle from Poison, by Size<br>Group, State, Region and U.S. ....                                     | 33   |
| Losses of Cattle from Respiratory Problems,<br>by Size Group, State, Region and U.S. ....                       | 15   |
| Losses of Cattle from Theft, by Size<br>Group, State, Region and U.S. ....                                      | 39   |

-- continued

## Index (continued)

|                                                                                                     | Page |
|-----------------------------------------------------------------------------------------------------|------|
| Losses of Cattle from Weather, by Size<br>Group, State, Region and U.S. ....                        | 27   |
| Losses of Dairy Calves from All Causes,<br>by Size Group, State, Region and U.S. ....               | 8    |
| Losses of Dairy Calves from Calving Problems,<br>by Size Group, State, Region and U.S. ....         | 26   |
| Losses of Dairy Calves from Digestive Problems,<br>by Size Group, State, Region and U.S. ....       | 14   |
| Losses of Dairy Calves from Other and Unknown<br>Causes, by Size Group, State, Region and U.S. .... | 50   |
| Losses of Dairy Calves from Poison, by Size<br>Group, State, Region and U.S. ....                   | 38   |
| Losses of Dairy Calves from Respiratory Problems,<br>by Size Group, State, Region and U.S. ....     | 20   |
| Losses of Dairy Calves from Theft, by Size<br>Group, State, Region and U.S. ....                    | 44   |
| Losses of Dairy Calves from Weather, by Size<br>Group, State, Region and U.S. ....                  | 32   |
| Losses of Dairy Cattle from All Causes,<br>by Size Group, State, Region and U.S. ....               | 5    |
| Losses of Dairy Cattle from Calving Problems,<br>by Size Group, State, Region and U.S. ....         | 23   |
| Losses of Dairy Cattle from Digestive Problems,<br>by Size Group, State, Region and U.S. ....       | 11   |
| Losses of Dairy Cattle from Other and Unknown<br>Causes, by Size Group, State, Region and U.S. .... | 47   |
| Losses of Dairy Cattle from Poison, by Size<br>Group, State, Region and U.S. ....                   | 35   |
| Losses of Dairy Cattle from Respiratory Problems,<br>by Size Group, State, Region and U.S. ....     | 17   |
| Losses of Dairy Cattle from Theft, by Size<br>Group, State, Region and U.S. ....                    | 41   |
| Losses of Dairy Cattle from Weather, by Size<br>Group, State, Region and U.S. ....                  | 29   |
| Survey Procedures and Reliability .....                                                             | 54   |
