# Supplementary material for: The Elephant in the room: What can we learn from California regarding the use of sport hunting of pumas (Puma concolor) as a management tool?
Source: PLOS journal article supplement (doi:10.1371/journal.pone.0224638), 2020-02-13
Supplement: S3 (10.1371/journal.pone.0224638.s003) [file journal.pone.0224638.s003]

Table. Trends in cougar complaints, damage, harvest, and other mortality in Oregon during 1992–2018. Complaint and mortality data current through 11/29/18. Numbers may change as late data are added.

| Year              | Number of Complaints <sup>a</sup> | Tags Sold <sup>b</sup> | Hunter-Harvest | Damage <sup>c</sup> | Human Safety <sup>d</sup> | Administrative Removals <sup>e</sup> | Other <sup>f</sup> | Total |
|-------------------|-----------------------------------|------------------------|----------------|---------------------|---------------------------|--------------------------------------|--------------------|-------|
| 1992              | 184                               | 517                    | 184            | 17                  | 3                         | 0                                    | 22                 | 226   |
| 1993              | 276                               | 560                    | 162            | 20                  | 7                         | 0                                    | 21                 | 210   |
| 1994              | 554                               | 588                    | 199            | 29                  | 11                        | 0                                    | 20                 | 259   |
| 1995              | 742                               | 385                    | 22             | 41                  | 22                        | 0                                    | 12                 | 97    |
| 1996              | 840                               | 779                    | 43             | 64                  | 34                        | 0                                    | 25                 | 166   |
| 1997              | 798                               | 935                    | 61             | 82                  | 20                        | 0                                    | 18                 | 181   |
| 1998              | 954                               | 11,761                 | 111            | 93                  | 20                        | 0                                    | 17                 | 241   |
| 1999              | 1,072                             | 14,564                 | 169            | 91                  | 39                        | 0                                    | 25                 | 324   |
| 2000 <sup>g</sup> | 942                               | 22,386                 | 188            | 120                 | 27                        | 0                                    | 17                 | 352   |
| 2001              | 829                               | 28,447                 | 221            | 97                  | 27                        | 0                                    | 21                 | 366   |
| 2002              | 765                               | 32,126                 | 229            | 111                 | 25                        | 0                                    | 35                 | 400   |
| 2003              | 697                               | 34,135                 | 248            | 111                 | 28                        | 0                                    | 25                 | 412   |
| 2004              | 545                               | 34,071                 | 265            | 95                  | 28                        | 0                                    | 35                 | 423   |
| 2005              | 622                               | 38,079                 | 224            | 125                 | 28                        | 0                                    | 30                 | 407   |
| 2006              | 451                               | 38,719                 | 289            | 106                 | 26                        | 0                                    | 32                 | 453   |
| 2007              | 453                               | 41,813                 | 309            | 114                 | 21                        | 52                                   | 41                 | 537   |
| 2008              | 515                               | 43,211                 | 272            | 109                 | 23                        | 34                                   | 54                 | 492   |
| 2009              | 432                               | 45,375                 | 274            | 110                 | 31                        | 21                                   | 37                 | 473   |
| 2010              | 465                               | 48,776                 | 240            | 99                  | 25                        | 79                                   | 39                 | 482   |
| 2011              | 500                               | 50,889                 | 241            | 139                 | 23                        | 71                                   | 32                 | 506   |
| 2012              | 419                               | 53,698                 | 253            | 130                 | 46                        | 56                                   | 45                 | 530   |
| 2013              | 359                               | 55,072                 | 292            | 148                 | 24                        | 36                                   | 31                 | 531   |
| 2014              | 404                               | 56,114                 | 209            | 124                 | 27                        | 0                                    | 25                 | 385   |
| 2015              | 444                               | 57,387                 | 233            | 134                 | 22                        | 0                                    | 44                 | 433   |
| 2016              | 421                               | 58,091                 | 267            | 151                 | 18                        | 71                                   | 37                 | 544   |
| 2017              | 462                               | 57,950                 | 292            | 151                 | 27                        | 60                                   | 25                 | 571   |
| 2018*             | 618                               | 61,022                 | 225            | 156                 | 36                        | 56                                   | 30                 | 503   |

<sup>a</sup>Number of complaints received during the calendar year. Sightings not associated with damage or public safety concerns are not included.

<sup>b</sup>Includes general and additional tags (including Sports Pac licenses).

<sup>c</sup>Number of animals killed as a result of damage during a calendar year.

<sup>d</sup>Animals killed as a result of real or perceived threat to humans or pets.

<sup>e</sup>Administrative removals on cougar target areas (2007–present only).

<sup>f</sup>Includes roadkill, accidental, found dead, and illegal kill.

<sup>g</sup>Hunting season changed to calendar year.

\*as of 11/29/18
