# Supplementary material for: The Elephant in the room: What can we learn from California regarding the use of sport hunting of pumas (Puma concolor) as a management tool?
Source: PLOS journal article supplement (doi:10.1371/journal.pone.0224638), 2020-02-13
Supplement: S3 (10.1371/journal.pone.0224638.s003) [file journal.pone.0224638.s003]

# Sheep and Goat Predator Loss

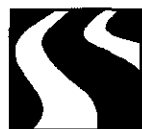

National  
Agricultural  
Statistics  
Service

United States  
Department of  
Agriculture

Washington, D.C.

Released April 27, 1995, by the Agricultural Statistics Board. Estimates refer to calendar year 1994.

A total of 368,050 sheep and lambs were lost from animal predators during 1994 in the United States. This represented 38.9 percent of the total losses from all causes and resulted in a loss of \$17.7 million due to predators to farmers and ranchers. Other non-predator causes include digestive and respiratory problems, weather-related causes and theft.

Coyotes were the largest cause of sheep and lamb losses to predators, with 66.2 percent of the total losses in 1994 from all animal predators. The West and Mountain states sustained the most losses with 91.8 percent of the total coyote losses. Nationally, losses from dogs were more widespread with Virginia losing 3,800 head of sheep and lambs, 400 head more than second place Texas.

Coyotes were also the largest predator of **Goats** in the five major producing states (AZ, MI, NM, OK, and TX) accounting for 29.3 percent. The value of goats lost from all predators was \$5.48 million.

This report is released as a cooperative effort between the National Agricultural Statistics Service and Animal and Plant Health Inspection Service - Animal Damage Control and National Animal Health Monitoring System.

Losses of Sheep and Lambs from Predators: Number of Head  
and Total Value, United States, 1994 1/

| Predator                             | Number<br>of Head | % of Total<br>Predators | Value      |
|--------------------------------------|-------------------|-------------------------|------------|
|                                      | Number            | Percent                 | Dollars    |
| Coyotes                              | 243,800           | 66.2                    | 11,504,900 |
| Dogs                                 | 40,325            | 11.0                    | 2,206,975  |
| Mountain Lions,<br>Cougars, or Pumas | 28,500            | 7.7                     | 1,460,600  |
| Bears                                | 12,250            | 3.3                     | 640,150    |
| Foxes                                | 12,350            | 3.4                     | 507,250    |
| Eagles                               | 15,000            | 4.1                     | 641,150    |
| Bobcats                              | 9,200             | 2.5                     | 418,425    |
| All Other Animals                    | 6,625             | 1.8                     | 337,450    |
| US                                   | 368,050           | 100.0                   | 17,716,900 |

1/ Lambs are after docking.

For information call Linda Simpson at (202) 720-3578. Office hours are 8:00 a.m. to 4:30 p.m. ET.

Losses of Sheep and Lambs: Number and Percent by Coyotes  
and Dogs by State and United States, 1994 2/

| State | Coyotes |         |         |         | Dogs   |         |        |         |
|-------|---------|---------|---------|---------|--------|---------|--------|---------|
|       | Sheep   | % Total | Lambs   | % Total | Sheep  | % Total | Lambs  | % Total |
|       | Head    | Pct     | Head    | Pct     | Head   | Pct     | Head   | Pct     |
| AL    | 800     | 94.1    | 1,500   | 92.3    | 1/     |         | 100    | 6.2     |
| AZ    | 1,500   | 85.7    | 2,100   | 79.2    | 150    | 8.6     | 450    | 17.0    |
| AR    | 1/      |         | 1/      |         | 1/     |         | 125    | 62.5    |
| CA    | 5,750   | 61.5    | 10,800  | 71.6    | 925    | 9.9     | 1,625  | 10.8    |
| CO    | 2,700   | 41.5    | 12,500  | 62.5    | 1,000  | 15.4    | 1,300  | 6.5     |
| CT    | 375     | 88.2    | 300     | 100.0   | 0      |         | 0      |         |
| DE    | 0       |         | 0       |         | 0      |         | 0      |         |
| FL    | 1/      |         | 125     | 62.5    | 0      |         | 1/     |         |
| GA    | 1/      |         | 200     | 88.9    | 0      |         | 1/     |         |
| HI    | 0       |         | 0       |         | 1/     |         | 1/     |         |
| ID    | 2,900   | 76.3    | 8,600   | 86.9    | 300    | 7.9     | 400    | 4.0     |
| IL    | 450     | 43.9    | 1,100   | 49.4    | 575    | 56.1    | 825    | 37.1    |
| IN    | 300     | 32.4    | 175     | 41.2    | 625    | 67.6    | 250    | 58.8    |
| IA    | 300     | 24.0    | 925     | 36.6    | 900    | 72.0    | 1,575  | 62.4    |
| KS    | 575     | 51.1    | 600     | 58.5    | 550    | 48.9    | 125    | 12.2    |
| KY    | 450     | 85.7    | 425     | 51.5    | 1/     |         | 400    | 48.5    |
| LA    | 175     | 77.8    | 700     | 100.0   | 1/     |         | 0      |         |
| ME    | 1/      |         | 1/      |         | 0      |         | 0      |         |
| MD    | 0       |         | 0       |         | 100    | 100.0   | 275    | 91.7    |
| MA    | 1/      |         | 150     | 75.0    | 1/     |         | 1/     |         |
| MI    | 125     | 15.6    | 700     | 68.3    | 650    | 81.3    | 325    | 31.7    |
| MN    | 1/      |         | 1,000   | 47.1    | 750    | 69.8    | 800    | 37.6    |
| MS    | 0       |         | 150     | 75.0    | 100    | 100.0   | 1/     |         |
| MO    | 100     | 19.0    | 425     | 41.5    | 425    | 81.0    | 600    | 58.5    |
| MT    | 5,000   | 75.8    | 19,100  | 70.2    | 500    | 7.6     | 400    | 1.5     |
| NE    | 800     | 88.9    | 1,350   | 84.4    | 1/     |         | 200    | 12.5    |
| NV    | 3,075   | 81.5    | 10,375  | 83.8    | 1/     |         | 1/     |         |
| NH    | 1/      |         | 1/      |         | 0      |         | 0      |         |
| NJ    | 0       |         | 0       |         | 1/     |         | 1/     |         |
| NM    | 3,450   | 49.5    | 6,100   | 50.8    | 1,425  | 20.4    | 450    | 3.8     |
| NY    | 175     | 25.0    | 300     | 42.9    | 525    | 75.0    | 350    | 50.0    |
| NC    | 0       |         | 0       |         | 300    | 100.0   | 500    | 95.2    |
| ND    | 675     | 81.8    | 2,675   | 89.2    | 150    | 18.2    | 250    | 8.3     |
| OH    | 350     | 34.1    | 1,025   | 71.9    | 675    | 65.9    | 350    | 24.6    |
| OK    | 500     | 48.8    | 800     | 56.1    | 500    | 48.8    | 575    | 40.4    |
| OR    | 2,750   | 64.3    | 9,100   | 69.5    | 750    | 17.5    | 1,200  | 9.2     |
| PA    | 600     | 85.7    | 675     | 81.8    | 100    | 14.3    | 150    | 18.2    |
| RI    | 1/      |         | 1/      |         | 1/     |         | 0      |         |
| SC    | 1/      |         | 1/      |         | 0      |         | 1/     |         |
| SD    | 1,925   | 79.4    | 8,775   | 68.8    | 425    | 17.5    | 700    | 5.5     |
| TN    | 1/      |         | 1/      |         | 175    | 77.8    | 175    | 77.8    |
| TX    | 7,400   | 45.1    | 19,700  | 63.5    | 2,300  | 14.0    | 1,100  | 3.5     |
| UT    | 5,950   | 60.3    | 15,925  | 65.4    | 550    | 5.6     | 525    | 2.2     |
| VT    | 225     | 69.2    | 200     | 100.0   | 1/     |         | 0      |         |
| VA    | 100     | 4.8     | 1,025   | 33.6    | 2,000  | 95.2    | 1,800  | 59.0    |
| WA    | 575     | 76.7    | 800     | 80.0    | 125    | 16.7    | 200    | 20.0    |
| WV    | 300     | 22.2    | 2,000   | 47.3    | 1,000  | 74.1    | 2,000  | 47.3    |
| WI    | 100     | 50.0    | 1,300   | 94.5    | 1/     |         | 1/     |         |
| WY    | 11,500  | 76.7    | 37,500  | 81.5    | 400    | 2.7     | 200    | .4      |
| US    | 62,325  | 58.5    | 181,475 | 69.4    | 19,600 | 18.4    | 20,725 | 7.9     |

1/ Less than 100 head for the State but data are included in the US totals.

2/ Lambs are after docking.

## 1994 Sheep and Lamb Losses from Coyotes 10 Largest States

---

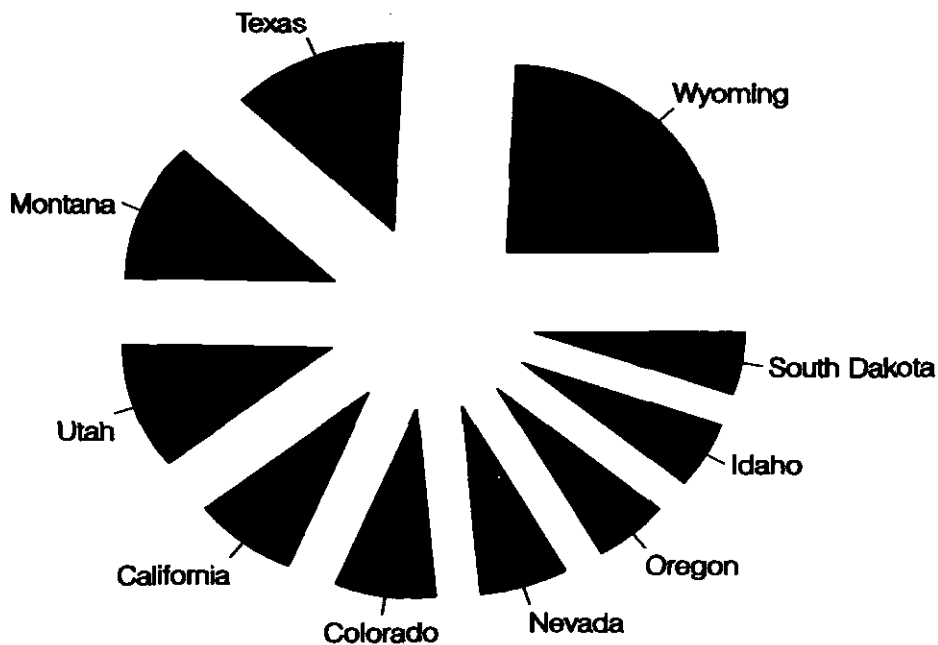

## 1994 Sheep and Lamb Losses from Dogs 10 Largest States

---

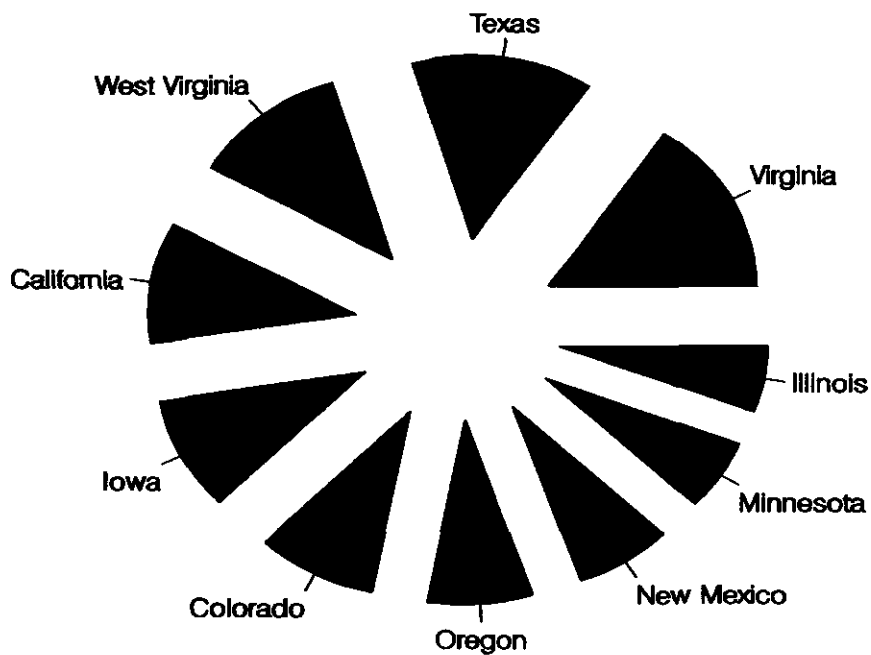

Losses of Sheep and Lambs: Number and Percent by Mountain Lions, Cougars, or Pumas, Bears, Foxes, and Eagles by State and United States, 1994 5/

| : Mountain Lions, Cougars, or Pumas : Bears |           |        |          |         |           |        |          |         |
|---------------------------------------------|-----------|--------|----------|---------|-----------|--------|----------|---------|
| State                                       | :% Total: |        | :% Total |         | :% Total: |        | :% Total |         |
|                                             | Sheep     | :Pred. | Lambs    | : Pred. | Sheep     | :Pred. | Lambs    | : Pred. |
|                                             | Head      | Pct    | Head     | Pct     | Head      | Pct    | Head     | Pct     |
| AZ                                          | 100       | 5.7    | 100      | 3.8     | 0         |        | 0        |         |
| CA                                          | 2,275     | 24.3   | 1,850    | 12.3    | 275       | 2.9    | 325      | 2.2     |
| CO                                          | 1,200     | 18.5   | 2,900    | 14.5    | 1,300     | 20.0   | 2,000    | 10.0    |
| ID                                          | 100       | 2.6    | 200      | 2.0     | 300       | 7.9    | 500      | 5.1     |
| MT                                          | 400       | 6.1    | 500      | 1.8     | 200       | 3.0    | 400      | 1.5     |
| NV                                          | 475       | 12.6   | 1,050    | 8.5     | 1/        |        | 225      | 1.8     |
| NM                                          | 450       | 6.5    | 700      | 5.8     | 325       | 4.7    | 300      | 2.5     |
| OR                                          | 450       | 10.5   | 1,625    | 12.4    | 225       | 5.3    | 400      | 3.1     |
| TX                                          | 3,300     | 20.1   | 1,600    | 5.2     | 0         |        | 100      | .3      |
| UT                                          | 2,200     | 22.3   | 5,350    | 22.0    | 875       | 8.9    | 1,900    | 7.8     |
| WA                                          | 0         |        | 0        |         | 0         |        | 0        |         |
| WY                                          | 500       | 3.3    | 1,100    | 2.4     | 1,000     | 6.7    | 1,400    | 3.0     |
| Oth                                         |           |        |          |         |           |        |          |         |
| Sts                                         | 0         |        | 1/       | 2/      | 1/        | 2/     | 1/       | 2/      |
| US                                          | 11,450    | 10.7   | 17,050   | 6.5     | 4,625     | 4.3    | 7,625    | 2.9     |
| : Foxes : Eagles                            |           |        |          |         |           |        |          |         |
| AZ                                          | 0         |        | 0        |         | 0         |        | 0        |         |
| CA                                          | 0         |        | 0        |         | 0         |        | 125      | .8      |
| CO                                          | 0         |        | 100      | .5      | 0         |        | 600      | 3.0     |
| ID                                          | 0         |        | 100      | 1.0     | 0         |        | 0        |         |
| MT                                          | 100       | 1.5    | 3,600    | 13.2    | 100       | 1.5    | 3,200    | 11.8    |
| NV                                          | 0         |        | 0        |         | 0         |        | 0        |         |
| NM                                          | 0         |        | 325      | 2.7     | 600       | 8.6    | 1,325    | 11.0    |
| OR                                          | 0         |        | 150      | 1.1     | 0         |        | 375      | 2.9     |
| TX                                          | 500       | 3.0    | 2,000    | 6.5     | 200       | 1.2    | 3,200    | 10.3    |
| UT                                          | 125       | 1.3    | 450      | 1.8     | 0         |        | 125      | .5      |
| WA                                          | 0         |        | 0        |         | 0         |        | 0        |         |
| WY                                          | 100       | .7     | 2,400    | 5.2     | 1,000     | 6.7    | 2,900    | 6.3     |
| Oth                                         |           |        |          |         |           |        |          |         |
| Sts                                         | 0         |        | 3/2,400  | 2/      | 0         |        | 4/1,250  | 2/      |
| US                                          | 825       | .8     | 11,525   | 4.4     | 1,900     | 1.8    | 13,100   | 5.0     |

1/ Less than 100 head for the State(s) but data are included in US totals.

2/ Less than 0.1 percent.

3/ Includes MD, ND, NY, SD, VA, and WV.

4/ Includes IA, SC, SD and VA.

5/ Lambs are after docking.

Losses of Sheep and Lambs: Number and Percent by Bobcats  
by State and United States, 1994 3/

| State      | Bobcats |         |       |         |
|------------|---------|---------|-------|---------|
|            | Sheep   | % Total | Lambs | % Total |
|            | Head    | Pct     | Head  | Pct     |
| AZ         | 0       |         | 0     |         |
| CA         | 0       |         | 175   | 1.2     |
| CO         | 0       |         | 100   | .5      |
| ID         | 0       |         | 0     |         |
| MT         | 200     | 3.0     | 0     |         |
| NV         | 1/      | 2.0     | 225   | 1.8     |
| NM         | 700     | 10.0    | 2,800 | 23.3    |
| OR         | 1/      | 1.8     | 175   | 1.3     |
| TX         | 1,400   | 8.5     | 2,300 | 7.4     |
| UT         | 125     | 1.3     | 1/    | .2      |
| WA         | 0       |         | 0     |         |
| WY         | 200     | 1.3     | 200   | .4      |
| Oth<br>Sts | 100     | 2/      | 300   | 2/      |
| US         | 2,875   | 2.7     | 6,325 | 2.4     |

1/ Less than 100 head for the State but data are included in the US totals.  
2/ Less than 0.1 percent. 3/ Lambs are after docking.

**Sheep and Lambs Lost from Mountain Lions, Bears, Foxes,  
Eagles, Bobcats and Other Animals, United States 1994**

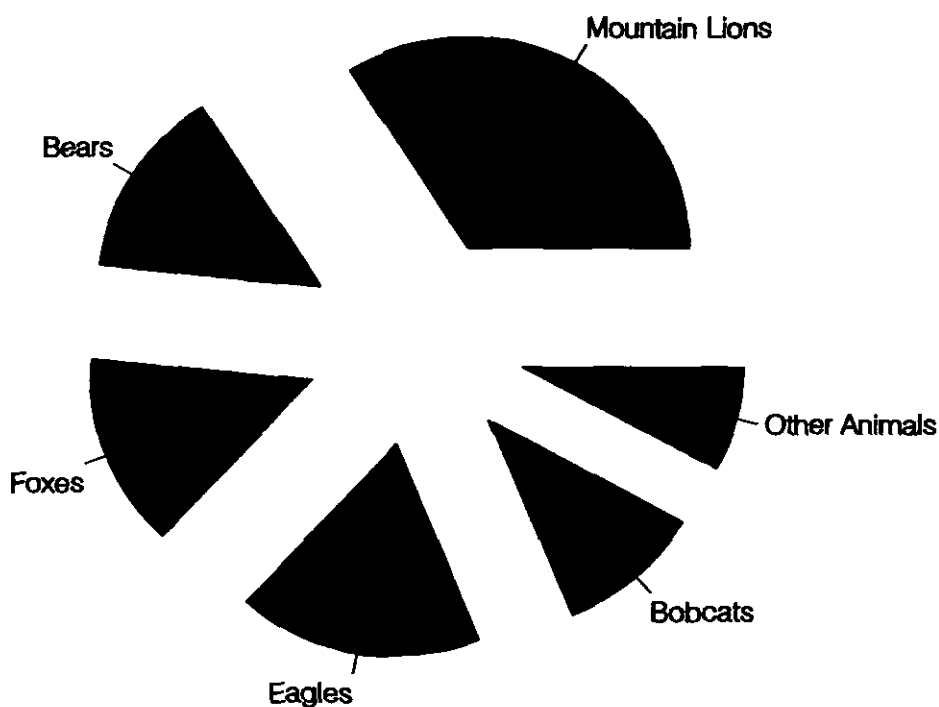

Losses of Sheep and Lambs: Number and Percent by All  
Other Animals by State and United States, 1994 2/

| State | All Other Animals 3/ |         |       |         |
|-------|----------------------|---------|-------|---------|
|       | Sheep                | % Total | Lambs | % Total |
|       | Head                 | Percent | Head  | Percent |
| AL    | 0                    |         | 1/    |         |
| AZ    | 0                    |         | 0     |         |
| AR    | 0                    |         | 0     |         |
| CA    | 125                  | 1.3     | 175   | 1.2     |
| CO    | 300                  | 4.6     | 500   | 2.5     |
| CT    | 1/                   |         | 0     |         |
| DE    | 0                    |         | 0     |         |
| FL    | 0                    |         | 0     |         |
| GA    | 0                    |         | 0     |         |
| HI    | 0                    |         | 0     |         |
| ID    | 200                  | 5.3     | 100   | 1.0     |
| IL    | 0                    |         | 300   | 13.5    |
| IN    | 0                    |         | 0     |         |
| IA    | 1/                   |         | 0     |         |
| KS    | 0                    |         | 1/    |         |
| KY    | 0                    |         | 0     |         |
| LA    | 0                    |         | 0     |         |
| ME    | 0                    |         | 0     |         |
| MD    | 0                    |         | 0     |         |
| MA    | 0                    |         | 0     |         |
| MI    | 1/                   |         | 0     |         |
| MN    | 250                  | 23.3    | 325   | 15.3    |
| MS    | 0                    |         | 0     |         |
| MO    | 0                    |         | 0     |         |
| MT    | 100                  | 1.5     | 0     |         |
| NE    | 0                    |         | 1/    |         |
| NV    | 0                    |         | 475   | 3.8     |
| NH    | 0                    |         | 0     |         |
| NJ    | 0                    |         | 0     |         |
| NM    | 1/                   |         | 0     |         |
| NY    | 0                    |         | 0     |         |
| NC    | 0                    |         | 1/    |         |
| ND    | 0                    |         | 0     |         |
| OH    | 0                    |         | 1/    |         |
| OK    | 0                    |         | 1/    |         |
| OR    | 1/                   |         | 1/    |         |
| PA    | 0                    |         | 0     |         |
| RI    | 0                    |         | 0     |         |
| SC    | 0                    |         | 1/    |         |
| SD    | 0                    |         | 1/    |         |
| TN    | 0                    |         | 0     |         |
| TX    | 1,300                | 7.9     | 1,000 | 3.2     |
| UT    | 1/                   |         | 1/    |         |
| VT    | 1/                   |         | 0     |         |
| VA    | 0                    |         | 1/    |         |
| WA    | 1/                   |         | 0     |         |
| WV    | 1/                   |         | 1/    |         |
| WI    | 1/                   |         | 0     |         |
| WY    | 300                  | 2.0     | 300   | .7      |
| US    | 2,975                | 2.8     | 3,650 | 1.4     |

1/ Less than 100 head for the State, but data are included in US totals.

2/ Lambs are after docking.

3/ Includes wolves, ravens, crows, pigs, etc.

## Number of Sheep and Lambs Lost from Predators United States 1994

---

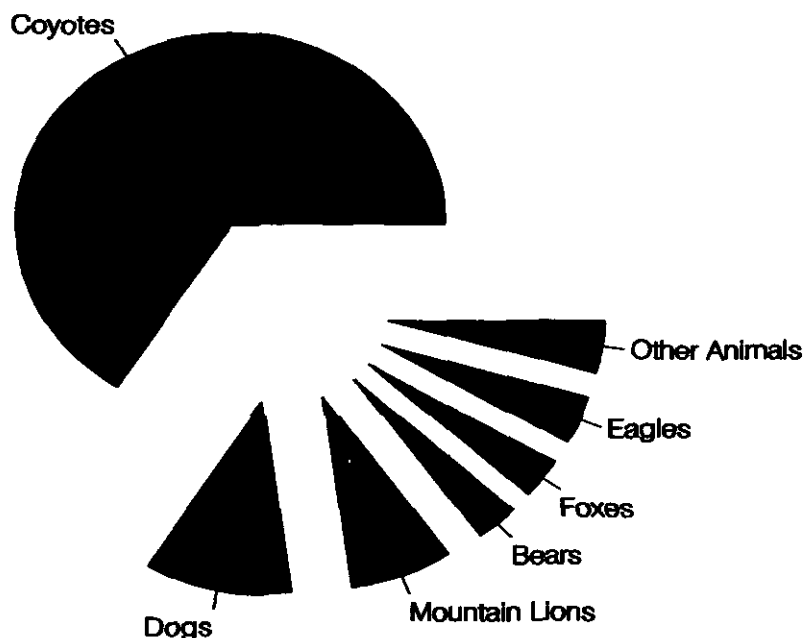

## Value of Sheep and Lambs Lost from Predators United States 1994

---

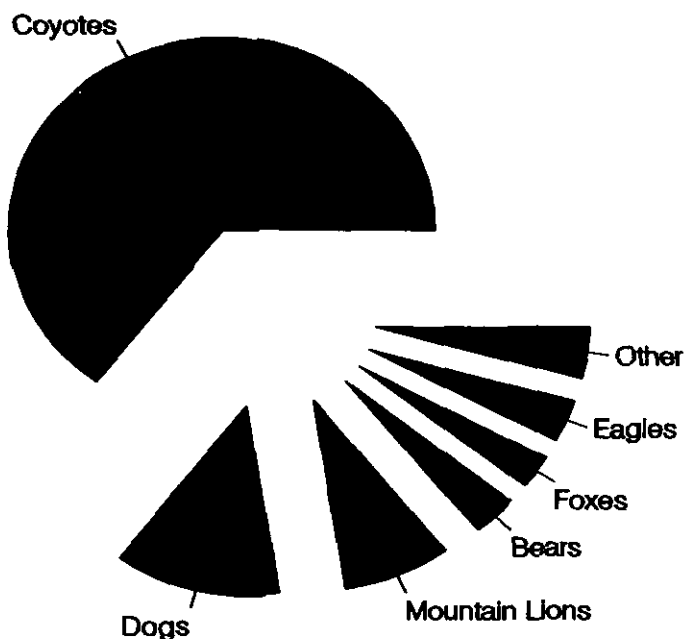

Losses of Lambs: By All Causes and Predators, Number  
and Total Value by State and United States, 1994 3/

| State | All Causes | Predators |             |            |
|-------|------------|-----------|-------------|------------|
|       | Lambs      | Lambs     | per Head 1/ | Value      |
|       | Head       | Head      | Dollars     | Dollars    |
| AL    | 2,500      | 1,625     | 30.00       | 48,750     |
| AZ    | 5,000      | 2,650     | 38.00       | 100,700    |
| AR    | 400        | 200       | 39.00       | 7,800      |
| CA    | 24,000     | 15,075    | 39.00       | 587,925    |
| CO    | 55,000     | 20,000    | 39.00       | 780,000    |
| CT    | 1,000      | 300       | 60.00       | 18,000     |
| DE    | 50         | 2/        |             |            |
| FL    | 400        | 200       | 38.00       | 7,600      |
| GA    | 400        | 225       | 38.00       | 8,550      |
| HI    | 2,000      | 2/        |             |            |
| ID    | 18,000     | 9,900     | 38.00       | 376,200    |
| IL    | 14,000     | 2,225     | 37.00       | 82,325     |
| IN    | 4,000      | 425       | 39.00       | 16,575     |
| IA    | 30,000     | 2,525     | 41.00       | 103,525    |
| KS    | 11,000     | 1,025     | 40.00       | 41,000     |
| KY    | 4,500      | 825       | 38.00       | 31,350     |
| LA    | 1,500      | 700       | 39.00       | 27,300     |
| ME    | 500        | 2/        |             |            |
| MD    | 2,000      | 300       | 44.00       | 13,200     |
| MA    | 800        | 200       | 66.00       | 13,200     |
| MI    | 10,000     | 1,025     | 42.00       | 43,050     |
| MN    | 21,000     | 2,125     | 39.00       | 82,875     |
| MS    | 300        | 200       | 39.00       | 7,800      |
| MO    | 4,700      | 1,025     | 39.00       | 39,975     |
| MT    | 40,000     | 27,200    | 40.00       | 1,088,000  |
| NE    | 13,000     | 1,600     | 39.00       | 62,400     |
| NV    | 13,000     | 12,375    | 31.00       | 383,625    |
| NH    | 900        | 2/        |             |            |
| NJ    | 1,700      | 2/        |             |            |
| NM    | 21,000     | 12,000    | 38.00       | 456,000    |
| NY    | 6,000      | 700       | 41.00       | 28,700     |
| NC    | 2,100      | 525       | 37.00       | 19,425     |
| ND    | 14,000     | 3,000     | 37.00       | 111,000    |
| OH    | 12,500     | 1,425     | 40.00       | 57,000     |
| OK    | 8,000      | 1,425     | 36.00       | 51,300     |
| OR    | 22,000     | 13,100    | 36.00       | 471,600    |
| PA    | 10,000     | 825       | 43.00       | 35,475     |
| RI    | 50         | 2/        |             |            |
| SC    | 200        | 150       | 37.00       | 5,550      |
| SD    | 45,000     | 12,750    | 40.00       | 510,000    |
| TN    | 1,600      | 225       | 41.00       | 9,225      |
| TX    | 50,000     | 31,000    | 39.00       | 1,209,000  |
| UT    | 32,000     | 24,350    | 38.00       | 925,300    |
| VT    | 2,300      | 200       | 57.00       | 11,400     |
| VA    | 15,000     | 3,050     | 41.00       | 125,050    |
| WA    | 2,000      | 1,000     | 34.00       | 34,000     |
| WV    | 12,000     | 4,225     | 41.00       | 173,225    |
| WI    | 12,000     | 1,375     | 40.00       | 55,000     |
| WY    | 60,000     | 46,000    | 40.00       | 1,840,000  |
| US    | 609,400    | 261,475   |             | 10,110,350 |

1/ Lamb value per head is based on the USDA annual average price received by farmers and ranchers in each State for a 60 pound lamb.

2/ Less than 100 head for the State but data are included in US totals.

3/ Lambs are after docking.



Losses of Sheep: By All Causes and Predators, Number  
and Total Value by State and United States, 1994

| State | All Causes | Predators |          |           |
|-------|------------|-----------|----------|-----------|
|       | Sheep      | Sheep     | per Head | Value     |
|       | Head       | Head      | Dollars  | Dollars   |
| AL    | 1,000      | 850       | 62.00    | 52,700    |
| AZ    | 3,000      | 1,750     | 92.00    | 161,000   |
| AR    | 50         | 2/        |          |           |
| CA    | 24,000     | 9,350     | 85.00    | 794,750   |
| CO    | 15,000     | 6,500     | 78.00    | 507,000   |
| CT    | 700        | 425       | 115.00   | 48,875    |
| DE    | 50         | 0         |          |           |
| FL    | 50         | 2/        |          |           |
| GA    | 50         | 2/        |          |           |
| HI    | 1,700      | 2/        |          |           |
| ID    | 12,000     | 3,800     | 83.00    | 315,400   |
| IL    | 4,000      | 1,025     | 93.00    | 95,325    |
| IN    | 2,000      | 925       | 88.00    | 81,400    |
| IA    | 8,000      | 1,250     | 76.00    | 95,000    |
| KS    | 7,000      | 1,125     | 68.00    | 76,500    |
| KY    | 1,300      | 525       | 77.00    | 40,425    |
| LA    | 600        | 225       | 85.00    | 19,125    |
| ME    | 200        | 2/        |          |           |
| MD    | 1,000      | 100       | 110.00   | 11,000    |
| MA    | 500        | 100       | 115.00   | 11,500    |
| MI    | 4,000      | 800       | 80.00    | 64,000    |
| MN    | 9,000      | 1,075     | 71.00    | 76,325    |
| MS    | 100        | 100       | 70.00    | 7,000     |
| MO    | 1,900      | 525       | 66.00    | 34,650    |
| MT    | 29,000     | 6,600     | 65.00    | 429,000   |
| NE    | 5,000      | 900       | 69.00    | 62,100    |
| NV    | 8,000      | 3,775     | 77.00    | 290,675   |
| NH    | 400        | 2/        |          |           |
| NJ    | 700        | 2/        |          |           |
| NM    | 21,000     | 6,975     | 65.00    | 453,375   |
| NY    | 5,000      | 700       | 100.00   | 70,000    |
| NC    | 1,300      | 300       | 78.00    | 23,400    |
| ND    | 4,000      | 825       | 72.00    | 59,400    |
| OH    | 4,500      | 1,025     | 83.00    | 85,075    |
| OK    | 4,000      | 1,025     | 66.00    | 67,650    |
| OR    | 14,000     | 4,275     | 66.00    | 282,150   |
| PA    | 4,000      | 700       | 90.00    | 63,000    |
| RI    | 50         | 2/        |          |           |
| SC    | 50         | 2/        |          |           |
| SD    | 20,000     | 2,425     | 67.00    | 162,475   |
| TN    | 1,000      | 225       | 84.00    | 18,900    |
| TX    | 46,000     | 16,400    | 55.00    | 902,000   |
| UT    | 18,000     | 9,875     | 78.00    | 770,250   |
| VT    | 800        | 325       | 110.00   | 35,750    |
| VA    | 8,000      | 2,100     | 55.00    | 115,500   |
| WA    | 2,000      | 750       | 78.00    | 58,500    |
| WV    | 4,600      | 1,350     | 58.00    | 78,300    |
| WI    | 3,000      | 200       | 86.00    | 17,200    |
| WY    | 35,000     | 15,000    | 69.00    | 1,035,000 |
| US    | 336,600    | 106,575   |          | 7,606,550 |

1/ Sheep value per head is based on a two-year straight average of the value of ewes one year old and older from the January 1, 1994 and the January 1, 1995 NASS Agricultural Surveys.

2/ Less than 100 head for the State but data are included in US totals.

## 1994 Sheep Losses from Predators 10 Largest States

---

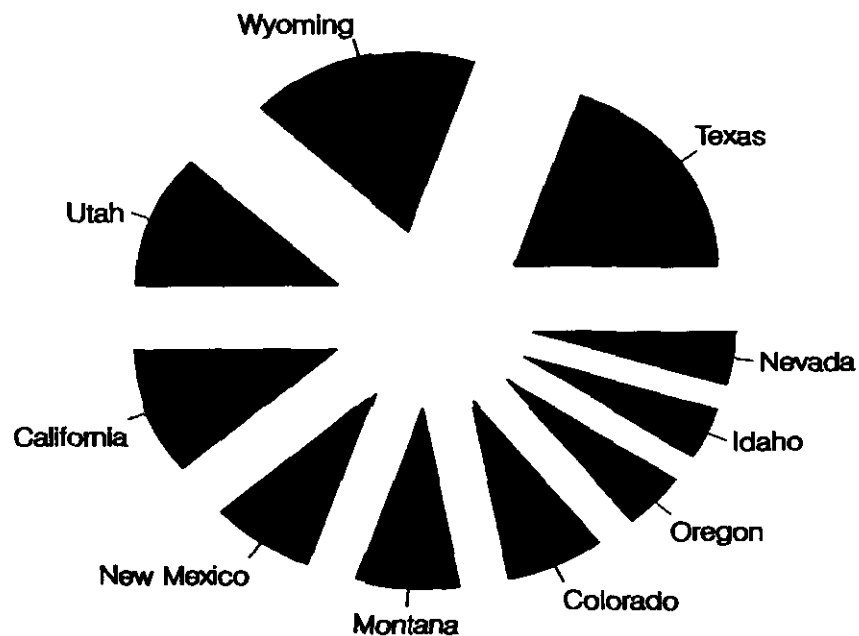

## 1994 Lamb Losses After Docking from Predators 10 Largest States

---

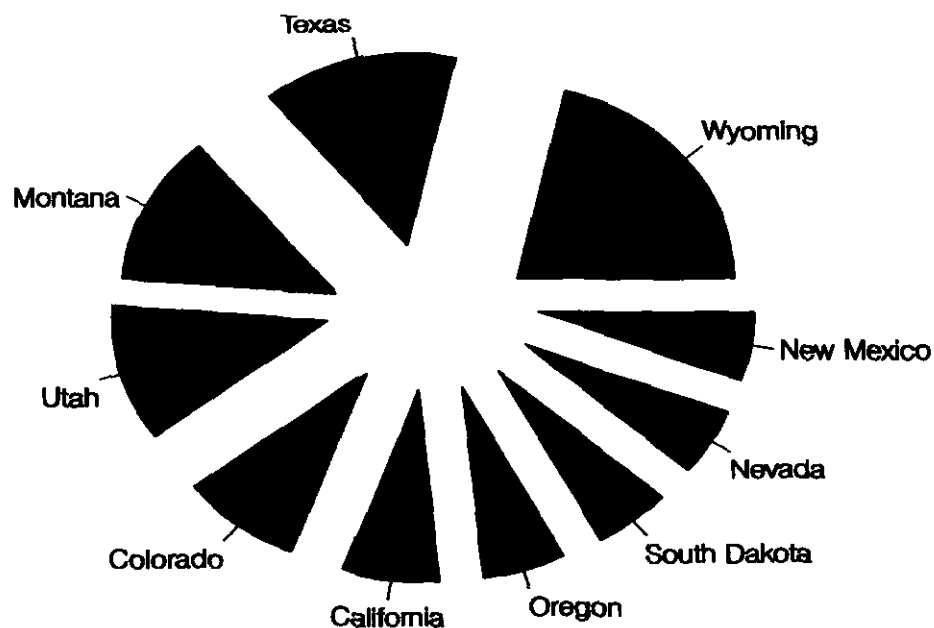

Losses of Sheep and Lambs: Number by Specific Predators  
and Total Value by Region and United States, 1994 1/

| Region:        | Predator Losses |         |                 | Coyotes                           |         |                 |
|----------------|-----------------|---------|-----------------|-----------------------------------|---------|-----------------|
|                | Sheep           | Lambs   | Sheep and Lambs | Sheep                             | Lambs   | Sheep and Lambs |
|                | Head            | Head    | Dollars         | Head                              | Head    | Dollars         |
| Mtn and West   | 91,400          | 234,475 | 15,459,150      | 57,025                            | 166,800 | 10,476,300      |
| Mid-west       | 6,875           | 12,350  | 1,040,600       | 1,825                             | 6,725   | 418,725         |
| South and East | 8,300           | 14,650  | 1,217,150       | 3,475                             | 7,950   | 609,875         |
| US             | 106,575         | 261,475 | 17,716,900      | 62,325                            | 181,475 | 11,504,900      |
|                | Dogs            |         |                 | Mountain Lions, Cougars, or Pumas |         |                 |
| Mtn and West   | 10,250          | 9,750   | 1,073,050       | 11,450                            | 17,050  | 1,460,600       |
| Mid-west       | 4,675           | 4,925   | 567,225         | 0                                 | 0       | 0               |
| South and East | 4,675           | 6,050   | 566,700         | 0                                 | 0       | 0               |
| US             | 19,600          | 20,725  | 2,206,975       | 11,450                            | 17,050  | 1,460,600       |
|                | Bears           |         |                 | Foxes                             |         |                 |
| Mtn and West   | 4,600           | 7,550   | 633,950         | 825                               | 11,325  | 498,975         |
| Mid-west       | 0               | 0       | 0               | 0                                 | 0       | 0               |
| South and East | 2/              | 2/      | 6,200           | 0                                 | 200     | 8,275           |
| US             | 4,625           | 7,625   | 640,150         | 825                               | 11,525  | 507,250         |

-- continued

Losses of Sheep and Lambs: Number by Specific Predators and Total Value by Region and United States, 1994 (continued) 1/

| Region:              | Eagles |        |                 | Bobcats |       |                 |
|----------------------|--------|--------|-----------------|---------|-------|-----------------|
|                      | Sheep  | Lambs  | Sheep and Lambs | Sheep   | Lambs | Sheep and Lambs |
|                      | Head   | Head   | Dollars         | Head    | Head  | Dollars         |
| Mtn and West         | 1,900  | 12,925 | 634,175         | 2,875   | 6,250 | 415,350         |
| Mid-west             | 0      | 2/     | 1,025           | 0       | 0     | 0               |
| South and East       | 0      | 150    | 5,950           | 0       | 2/    | 3,075           |
| US                   | 1,900  | 13,100 | 641,150         | 2,875   | 6,325 | 418,425         |
| All Other Animals 3/ |        |        |                 |         |       |                 |
| Mtn and West         | 2,475  | 2,825  | 266,750         |         |       |                 |
| Mid-west             | 375    | 675    | 53,625          |         |       |                 |
| South and East       | 125    | 150    | 17,075          |         |       |                 |
| US                   | 2,975  | 3,650  | 337,450         |         |       |                 |

1/ Lambs are after docking.

2/ Less than 100 head for the region but data are included in US totals.

3/ Includes wolves, ravens, crows, pigs, etc.

Losses of All Goats (Angora and Other): Number by Specific  
Predators and Total Value, 5-States, 1994 2/

| Predator                             | Losses  | Value 1/  |
|--------------------------------------|---------|-----------|
|                                      | Head    | Dollars   |
| Coyotes                              | 41,000  |           |
| Dogs                                 | 15,000  |           |
| Mountain Lions,<br>Cougars, or Pumas | 5,000   |           |
| Bears                                | 1,000   |           |
| Foxes                                | 7,000   |           |
| Eagles                               | 25,000  |           |
| Bobcats                              | 21,000  |           |
| All Other Animals 3/                 | 25,000  |           |
| 5-State                              | 140,000 | 5,481,000 |

1/ Goat value is based on a straight average of the value per head of all goats from the January 1, 1994 and January 1, 1995 NASS Agricultural Surveys.

2/ Includes AZ, MI, NM, OK, and TX.

3/ Includes wolves, ravens, crows, pigs, etc.

## Number of Goats Lost from Predators United States 1994

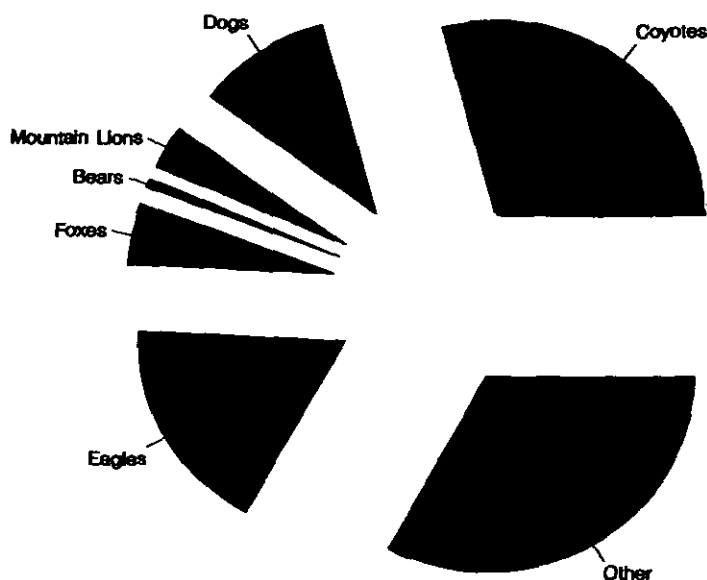

## **Reliability of Sheep and Goat Predator Loss Estimates**

**Survey Procedures:** A random sample of U. S. producers was surveyed to provide data for these estimates. Survey procedures ensured that all sheep and goat producers, regardless of size, had a chance to be included in the survey. (Alaska was not included.) Large producers were sampled more heavily than small operations. About 75,000 operators were contacted during the first half of January by mail, telephone, and face-to-face personal interviews. An additional non-probability survey was also conducted in a few western States.

**Revision Policy:** Revisions to previous estimates are made to improve the current estimate. Previous year estimates are subject to revision when current estimates are made. Estimates for losses from all causes are subject to revision in NASS' following year's **"Meat Animals, Production, Disposition and Income Report"**. No revision to predator losses is planned.

**Estimation Procedures:** Total death losses from all causes for sheep and lambs were as reported in **"Meat Animals, Production, Disposition, and Income - 1994"** (released April 13, 1995).

In setting the predator loss estimates, first total predator losses were estimated as a percent of total losses, then specific predator losses were estimated as a percent of total predator losses. States were combined into regions, when sampling variability did not permit individual State data to be released.

## **Terms and Definitions**

**Lamb:** Sheep less than one year old. In the Western States, lamb losses are after docking.

**Regions:** Regions were defined to allow comparison with earlier USDA research on sheep and lamb losses and a similar study done by NASS released April 21, 1991.

States in each region were:

### **Mountain and Western:**

|                 |                   |                   |               |
|-----------------|-------------------|-------------------|---------------|
| Arizona (AZ)    | California (CA)   | Colorado (CO)     | Hawaii (HI)   |
| Idaho (ID)      | Kansas (KS)       | Montana (MT)      | Nebraska (NE) |
| Nevada (NV)     | New Mexico (NM)   | North Dakota (ND) | Oklahoma (OK) |
| Oregon (OR)     | South Dakota (SD) | Texas (TX)        | Utah (UT)     |
| Washington (WA) | Wyoming (WY)      |                   |               |

### **Midwest:**

|                |                |               |           |
|----------------|----------------|---------------|-----------|
| Arkansas (AR)  | Illinois (IL)  | Indiana (IN)  | Iowa (IA) |
| Michigan (MI)  | Minnesota (MN) | Missouri (MO) | Ohio (OH) |
| Wisconsin (WI) |                |               |           |

### **Southern and Eastern:**

|                   |                     |                     |                    |
|-------------------|---------------------|---------------------|--------------------|
| Alabama (AL)      | Connecticut (CT)    | Delaware (DE)       | Florida (FL)       |
| Georgia (GA)      | Kentucky (KY)       | Louisiana (LA)      | Maine (ME)         |
| Maryland (MD)     | Massachusetts (MA)  | Mississippi (MS)    | New Hampshire (NH) |
| New Jersey (NJ)   | New York (NY)       | North Carolina (NC) | Pennsylvania (PA)  |
| Rhode Island (RI) | South Carolina (SC) | Tennessee (TN)      | Vermont (VT)       |
| Virginia (VA)     | West Virginia (WV)  |                     |                    |

The next report on sheep and lamb losses from all causes, including predator losses by size of flock, will be released in May 1995.

The United States Department of Agriculture (USDA) prohibits discrimination in its programs on the basis of race, color, national origin, sex, religion, age, disability, political beliefs, and marital or familial status. Persons with disabilities who require alternative means for communication of program information (braille, large print, audiotape, etc.) should contact the USDA Office of Communications at (202) 720-5881 (voice) or (202) 720-7808 (TDD).

To file a complaint, write the Secretary of Agriculture, USDA, Washington, D.C., 20250, or call (202) 720-7327 (voice) or (202) 720-1127 (TDD). USDA is an equal employment opportunity employer.

#### **Subscription Information**

To subscribe to NASS reports or to order single copies, call toll free, 1-800-999-6779 (weekdays 8:30 a.m.-5:00 p.m. ET). You may write: ERS/NASS, 341 Victory Drive, Herndon VA 22070.
