# Supplementary material for: The Elephant in the room: What can we learn from California regarding the use of sport hunting of pumas (Puma concolor) as a management tool?
Source: PLOS journal article supplement (doi:10.1371/journal.pone.0224638), 2020-02-13
Supplement: S3 (10.1371/journal.pone.0224638.s003) [file journal.pone.0224638.s003]

# Sheep and Goat Predator Loss

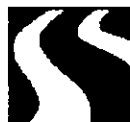

National  
Agricultural  
Statistics  
Service

United States  
Department of  
Agriculture

Agricultural  
Statistics  
Board

Washington, D.C.

RELEASED: April 24, 1991  
3:00 P. M. ET

## In this issue:

- \* Losses of Sheep and Lambs from Coyotes, Dogs and Total Predators by State
- \* Losses from All Predators by Region
- \* Value of All Predator losses for Sheep and Lambs by State
- \* Number and Value of Goat Losses for 5 States

A total of 490 thousand sheep and lambs were lost from animal predators during 1990, in the United States, according to the Agricultural Statistics Board. This resulted in a loss of \$21.7 million for farmers and ranchers. This is 36.9 percent (%) of the total losses from all causes.

Coyotes were the largest cause of sheep and lamb losses to predators, with 63.7% of the total losses from all animal predators. Most losses were in the West, but substantial losses from coyotes were prevalent throughout the United States. The value of losses for both sheep and lambs caused by coyotes was \$13.6 million. Dogs were the second largest cause, accounting for 13.6% of the sheep and lamb losses due to predators.

Other common predators were mountain lions, bears, foxes, eagles, and bobcats. Wild pigs were a major threat in Hawaii.

Losses of Sheep and Lambs from Predators,  
Number of Head, and Total Value, United States, 1990

| Predator          | Sheep and<br>Lambs | Total<br>Predators | Total<br>Value |
|-------------------|--------------------|--------------------|----------------|
|                   | Head               | Percent            | Dollars        |
| Coyotes           | 311,900            | 63.7               | 13,555,500     |
| Dogs              | 66,400             | 13.6               | 3,424,875      |
| Mountain Lions    | 16,800             | 3.4                | 814,875        |
| Bears             | 8,000              | 1.6                | 454,475        |
| Foxes             | 12,800             | 2.6                | 451,550        |
| Eagles            | 17,700             | 3.6                | 622,500        |
| Bobcats           | 13,600             | 2.8                | 493,750        |
| All Other Animals | 42,300             | 8.7                | 1,878,175      |
| US                | 489,500            | 100.0              | 21,695,700     |

**Coyotes** were also the largest predator of **Goats** in the five major producing States, accounting for over half of the total losses caused by predators. The value lost was \$5.66 million.

**Survey Procedures:** Primary data for sheep and lamb loss estimates were from a sample of agricultural producers across the US using probability surveys in all States (except Alaska which was not in the survey) and an additional non-probability survey in a few Western States. The five major goat producing States (see **Terms and Definitions**) also collected losses for Angora, Spanish, and other goats. The probability survey included information from a list of about 57,300 agricultural producers plus additional information from operators of about 7,500 small land area tracts. Information from the probability survey was collected during the first half of January by mail, telephone, and personal interview. Data for the non-probability sample was obtained later. No similar Nationwide survey on predator losses for sheep, lambs, or goats is currently planned for any future date.

**Revision Policy:** Estimates for inventory numbers and losses to all causes are subject to revision in the following year's report and also after data for the five year Census of Agriculture, conducted by the Department of Commerce, are available. No revision to predator loss estimates is planned.

**Estimation Procedures:** The estimates were prepared by the Livestock, Dairy, and Poultry Branch, National Agricultural Statistics Service (NASS), and reviewed by all 49 states. Total death losses from all causes for sheep and lambs were as reported in **Meat Animals, Production, Disposition, and Income - 1990** (released April 12, 1991). In setting the predator loss estimates, first total predator losses were estimated as a percent of total losses then specific predator losses were generally estimated and rounded to the nearest 100 head using the percent of total predator losses as indicated by the survey data. States were combined into regions (see **Terms and Definitions**) when sampling variability did not permit individual State data to be released.

**Reliability:** Since all operations with sheep were not included in the sample, survey estimates are subject to sampling variability. This variation, as measured by the relative standard error, was 4.1 percent at the US level for stock sheep inventory and 4.3 percent for sheep on feed inventory. This means that chances are approximately 95 out of 100 that the survey estimate will be within plus or minus 8.2 percent for stock sheep inventory and 8.6 percent for sheep on feed inventory of the value that would result from averaging all possible samples selected from the same population and surveyed using the same procedures. The relative standard error for the specific losses caused by predators was higher.

Survey estimates are subject to non-sampling errors such as omissions, duplications, and mistakes in reporting, recording, and processing the data. These errors cannot be measured directly, but they are minimized through rigid quality controls in the data collection process and a careful review of all reported data for consistency and reasonableness.

## Terms and Definitions:

**Docked:** Lambs with tails removed.

**Goats:** Any of various hollow-horned ruminant animals (especially of Genus *Capra*) related to sheep but of lighter build and with backwardly arching horns. For this report included Angora (raised for mohair production) and other goats (for example, Spanish goats raised for meat and milk goats). Major goat producing States are Arizona, Michigan, New Mexico, Oklahoma, and Texas.

**Lamb:** Sheep less than one year old. In the Western States lamb losses are after docking. For this report, lambs on feed are included.

**Regions:** Regions were defined to allow comparison with earlier USDA research on sheep and lamb losses. States in each region are:

### Mountain and Western:

|            |              |              |          |
|------------|--------------|--------------|----------|
| Arizona    | California   | Colorado     | Hawaii   |
| Idaho      | Kansas       | Montana      | Nebraska |
| Nevada     | New Mexico   | North Dakota | Oklahoma |
| Oregon     | South Dakota | Texas        | Utah     |
| Washington | Wyoming      |              |          |

### Midwest:

|           |           |          |      |
|-----------|-----------|----------|------|
| Arkansas  | Illinois  | Indiana  | Iowa |
| Michigan  | Minnesota | Missouri | Ohio |
| Wisconsin |           |          |      |

### Southern and Eastern:

|              |                |                |               |
|--------------|----------------|----------------|---------------|
| Alabama      | Connecticut    | Delaware       | Florida       |
| Georgia      | Kentucky       | Louisiana      | Maine         |
| Maryland     | Massachusetts  | Mississippi    | New Hampshire |
| New Jersey   | New York       | North Carolina | Pennsylvania  |
| Rhode Island | South Carolina | Tennessee      | Vermont       |
| Virginia     | West Virginia  |                |               |

**Sheep:** Mature animals, one year old and older. For this report, includes stock sheep and sheep on feed.

**Sheep and Lambs on Feed:** Sheep and lambs intended for slaughter market that are being fed grain or other concentrates, or are being pastured on succulent grasses (for example, alfalfa) or crop residues (corn stalks, beet tops) are expected to produce a carcass that will grade select or better.

**Stock Sheep:** Sheep in the breeding flock, including ewes and rams used for breeding, wethers one year old and older, ewe lambs, and ram lambs.

**Value:** Sheep - A straight average of the value per head of ewes one year old and older from the January 1, 1990, NASS probability agricultural survey and the January 1, 1991, NASS probability agricultural survey (see Survey Procedures) for each State. Lambs - Each State's 1990 market year average price for lambs applied to an average weight of 60 pounds per lamb. This reflects the opportunity losses of lambs.

If a State was not part of the NASS price estimating program in 1990 (Alabama, Arkansas, Delaware, Florida, Georgia, Mississippi, Rhode Island, and South Carolina), a value for sheep and a price for lambs were estimated based on surrounding States. Hawaii submitted a value and price estimate although they were not part of the program.

Losses of Sheep and Lambs by Coyotes and Dogs,  
by States, and United States, 1990

| State | Coyotes |             |         |             | Dogs   |             |        |             |
|-------|---------|-------------|---------|-------------|--------|-------------|--------|-------------|
|       | Sheep   | Total Pred. | Lambs   | Total Pred. | Sheep  | Total Pred. | Lambs  | Total Pred. |
|       | Head    | Percent     | Head    | Percent     | Head   | Percent     | Head   | Percent     |
| AL    | 100     | 33.3        | 200     | 50.0        | 100    | 33.3        | 100    | 25.0        |
| AZ    | 2,600   | 65.0        | 5,100   | 68.0        | 1,000  | 25.0        | 1,800  | 24.0        |
| AR    | 100     | 50.0        | 400     | 50.0        | *      | ---         | 300    | 37.5        |
| CA    | 5,300   | 53.5        | 12,800  | 72.3        | 3,300  | 33.3        | 2,800  | 15.8        |
| CO    | 5,900   | 65.6        | 26,300  | 86.2        | 400    | 4.4         | 300    | 1.0         |
| CT    | *       | ---         | *       | ---         | 300    | 75.0        | *      | ---         |
| DE    | 0       | ---         | 0       | ---         | *      | ---         | 0      | ---         |
| FL    | *       | ---         | 200     | 66.7        | 100    | 50.0        | *      | ---         |
| GA    | *       | ---         | *       | ---         | 100    | 50.0        | 200    | 66.7        |
| HI    | 0       | ---         | 0       | ---         | 100    | 5.6         | *      | ---         |
| ID    | 2,600   | 72.2        | 6,200   | 81.6        | 400    | 11.1        | 500    | 6.6         |
| IL    | 700     | 36.8        | 1,200   | 42.9        | 1,100  | 57.9        | 800    | 28.6        |
| IN    | 100     | 5.0         | 200     | 8.7         | 1,800  | 90.0        | 2,000  | 87.0        |
| IA    | 5,800   | 61.7        | 2,900   | 56.9        | 3,100  | 33.0        | 2,100  | 41.2        |
| KS    | 1,300   | 65.0        | 1,300   | 72.2        | 600    | 30.0        | 400    | 22.2        |
| KY    | 100     | 20.0        | 800     | 66.7        | 300    | 60.0        | 300    | 25.0        |
| LA    | 200     | 50.0        | 200     | 66.7        | *      | ---         | *      | ---         |
| ME    | *       | ---         | 300     | 75.0        | *      | ---         | 0      | ---         |
| MD    | 0       | ---         | *       | ---         | 100    | 50.0        | 100    | 33.3        |
| MA    | *       | ---         | 0       | ---         | *      | ---         | *      | ---         |
| MI    | 100     | 25.0        | 200     | 25.0        | 200    | 50.0        | 500    | 62.5        |
| MN    | 300     | 18.8        | 1,700   | 53.1        | 400    | 25.0        | 500    | 15.6        |
| MS    | 100     | 33.3        | 300     | 75.0        | 100    | 33.3        | *      | ---         |
| MO    | 500     | 50.0        | 1,500   | 62.5        | 400    | 40.0        | 800    | 33.3        |
| MT    | 6,100   | 80.3        | 19,100  | 83.0        | 600    | 7.9         | 400    | 1.7         |
| NE    | 1,500   | 88.2        | 4,200   | 91.3        | 100    | 5.9         | 300    | 6.5         |
| NV    | 3,200   | 71.1        | 6,300   | 68.5        | 300    | 6.7         | 400    | 4.4         |
| NH    | *       | ---         | 100     | 50.0        | 200    | 66.7        | *      | ---         |
| NJ    | 0       | ---         | 0       | ---         | *      | ---         | *      | ---         |
| NM    | 4,300   | 43.0        | 10,600  | 39.3        | 300    | 3.0         | 1,100  | 4.1         |
| NY    | 200     | 20.0        | 200     | 28.6        | 700    | 70.0        | 300    | 42.9        |
| NC    | 0       | ---         | 0       | ---         | 500    | 83.3        | 1,400  | 93.3        |
| ND    | 1,100   | 64.7        | 4,500   | 84.9        | 500    | 29.4        | 600    | 11.3        |
| OH    | 200     | 13.3        | 1,700   | 54.8        | 1,200  | 80.0        | 1,300  | 41.9        |
| OK    | 2,800   | 93.3        | 4,400   | 89.8        | 100    | 3.3         | 400    | 8.2         |
| OR    | 3,200   | 62.8        | 9,900   | 52.7        | 1,200  | 23.5        | 7,100  | 37.8        |
| PA    | *       | ---         | *       | ---         | 500    | 83.3        | 400    | 66.7        |
| RI    | 0       | ---         | 0       | ---         | *      | ---         | *      | ---         |
| SC    | 0       | ---         | 0       | ---         | *      | ---         | *      | ---         |
| SD    | 8,200   | 94.3        | 20,700  | 91.2        | 300    | 3.5         | 300    | 1.3         |
| TN    | *       | ---         | 100     | 25.0        | 200    | 66.7        | 200    | 50.0        |
| TX    | 16,000  | 59.2        | 40,000  | 50.0        | 4,000  | 14.8        | 4,000  | 5.0         |
| UT    | 6,500   | 69.9        | 15,000  | 67.9        | 700    | 7.5         | 1,400  | 6.3         |
| VT    | *       | ---         | 300     | 100.0       | *      | ---         | 0      | ---         |
| VA    | 200     | 8.0         | 3,900   | 70.9        | 2,100  | 84.0        | 1,200  | 21.8        |
| WA    | 200     | 50.0        | 1,100   | 78.6        | 100    | 25.0        | 200    | 14.3        |
| WV    | *       | ---         | 500     | 27.8        | 600    | 66.7        | 1,200  | 66.7        |
| WI    | 300     | 60.0        | 900     | 69.2        | 100    | 20.0        | 200    | 15.4        |
| WY    | 4,300   | 75.4        | 21,900  | 82.3        | 700    | 12.3        | 700    | 2.6         |
| US    | 84,500  | 59.2        | 227,400 | 65.4        | 29,400 | 20.6        | 37,000 | 10.7        |

\* Less than 100 head for the State, but number is included in US total.

Losses of Sheep and Lambs by Mountain Lions, Bears, Foxes and Eagles,  
by Selected States, and United States, 1990

| State | Mountain Lions |             |        |             | Bears |             |       |             |
|-------|----------------|-------------|--------|-------------|-------|-------------|-------|-------------|
|       | Sheep          | Total Pred. | Lambs  | Total Pred. | Sheep | Total Pred. | Lambs | Total Pred. |
|       | Head           | Percent     | Head   | Percent     | Head  | Percent     | Head  | Percent     |
| AZ    | 200            | 5.0         | 200    | 2.7         | 1/    | ---         | 1/    | ---         |
| CA    | 900            | 9.1         | 500    | 2.8         | 100   | 1.0         | 1/    | ---         |
| CO    | 1,000          | 11.1        | 1,500  | 4.9         | 1,500 | 16.7        | 1,100 | 3.6         |
| ID    | 100            | 2.8         | 200    | 2.6         | 500   | 13.9        | 500   | 6.6         |
| MT    | 100            | 1.3         | 500    | 2.2         | 400   | 5.3         | 300   | 1.3         |
| NV    | 700            | 15.6        | 1,800  | 19.6        | 1/    | ---         | 100   | 1.1         |
| NM    | 200            | 2.0         | 400    | 1.5         | 1/    | ---         | 100   | 0.4         |
| OR    | 400            | 7.8         | 300    | 1.6         | 200   | 3.9         | 200   | 1.1         |
| TX    | 1,500          | 5.5         | 1,000  | 1.2         | 0     | ---         | 0     | ---         |
| UT    | 1,200          | 12.9        | 3,100  | 14.0        | 500   | 5.4         | 1,200 | 5.4         |
| WA    | 1/             | ---         | 1/     | ---         | 0     | ---         | 0     | ---         |
| WY    | 200            | 3.5         | 700    | 2.6         | 200   | 3.5         | 200   | 0.8         |
| Oth   | 0              | ---         | 0      | ---         | 2/400 | 9.5         | 3/300 | 3.6         |
| US    | 6,500          | 4.6         | 10,300 | 3.0         | 3,900 | 2.7         | 4,100 | 1.2         |

  

|     | Foxes |             |         |             | Eagles |             |        |             |
|-----|-------|-------------|---------|-------------|--------|-------------|--------|-------------|
|     | Sheep | Total Pred. | Lambs   | Total Pred. | Sheep  | Total Pred. | Lambs  | Total Pred. |
|     | Head  | Percent     | Head    | Percent     | Head   | Percent     | Head   | Percent     |
| AZ  | 0     | ---         | 0       | ---         | 0      | ---         | 100    | 1.3         |
| CA  | 1/    | ---         | 1/      | ---         | 1/     | ---         | 700    | 4.0         |
| CO  | 0     | ---         | 100     | 0.3         | 0      | ---         | 600    | 2.0         |
| ID  | 0     | ---         | 100     | 1.3         | 0      | ---         | 0      | ---         |
| MT  | 100   | 1.3         | 1,700   | 7.4         | 100    | 1.3         | 900    | 3.9         |
| NV  | 0     | ---         | 0       | ---         | 100    | 2.2         | 300    | 3.3         |
| NM  | 0     | ---         | 0       | ---         | 100    | 1.0         | 2,700  | 10.0        |
| OR  | 0     | ---         | 300     | 1.6         | 0      | ---         | 700    | 3.7         |
| TX  | 500   | 1.9         | 6,000   | 7.5         | 500    | 1.9         | 8,000  | 10.0        |
| UT  | 0     | ---         | 100     | 0.5         | 0      | ---         | 400    | 1.8         |
| WA  | 0     | ---         | 0       | ---         | 1/     | ---         | 1/     | ---         |
| WY  | 100   | 1.8         | 1,500   | 5.6         | 200    | 3.5         | 1,500  | 5.6         |
| Oth | 4/100 | 1.1         | 5/2,000 | 5.2         | 6/100  | 0.9         | 7/500  | 1.6         |
| US  | 900   | 0.6         | 11,900  | 3.4         | 1,200  | 0.8         | 16,500 | 4.8         |

1/ Less than 100 head for the State, but number is included in US total.  
2/ Includes ME, MI, NH, VA and WV. 3/ Includes MI, NH, VA and WV.  
4/ Includes MD and SD. 5/ Includes MD, NY, NC, ND, PA, SD, TN, VA and WI.  
6/ Includes ME, SD and VA. 7/ Includes FL, GA, ME, SC, SD, TN, VA and WI.

Losses of Sheep and Lambs by Bobcats,  
by Selected States, and United States, 1990

| State | Bobcats |                    |        |                    |
|-------|---------|--------------------|--------|--------------------|
|       | Sheep   | Total<br>Predators | Lambs  | Total<br>Predators |
|       |         |                    |        |                    |
|       | Head    | Percent            | Head   | Percent            |
| AZ    | 1/      | ---                | 100    | 1.3                |
| CA    | 1/      | ---                | 400    | 2.3                |
| CO    | 0       | ---                | 100    | 0.3                |
| ID    | 0       | ---                | 100    | 1.3                |
| MT    | 0       | ---                | 0      | ---                |
| NV    | 100     | 2.2                | 200    | 2.2                |
| NM    | 200     | 2.0                | 2,800  | 10.4               |
| OR    | 0       | ---                | 100    | 0.5                |
| TX    | 500     | 1.9                | 8,000  | 10.0               |
| UT    | 100     | 1.1                | 600    | 2.7                |
| WA    | 0       | ---                | 1/     | ---                |
| WY    | 0       | ---                | 0      | ---                |
| Oth   | 1/ 2/   | ---                | 3/100  | 1.2                |
| US    | 1,100   | 0.8                | 12,500 | 3.6                |

1/ Less than 100 head for the State, but number is included in US total.

2/ Includes FL and OK.

3/ Includes NC, OK and WV.

Losses of Sheep and Lambs by Other Animals, by States, and  
United States, 1990

| State | All Other Animals |         |        |         |
|-------|-------------------|---------|--------|---------|
|       | Sheep             | Total   | Lambs  | Total   |
|       | Head              | Percent | Head   | Percent |
| AL    | *                 | ---     | *      | ---     |
| AZ    | 100               | 2.5     | *      | ---     |
| AR    | *                 | ---     | 100    | 12.5    |
| CA    | 200               | 2.0     | 400    | 2.2     |
| CO    | 200               | 2.2     | 400    | 1.3     |
| CT    | *                 | ---     | *      | ---     |
| DE    | 0                 | ---     | *      | ---     |
| FL    | 0                 | ---     | *      | ---     |
| GA    | *                 | ---     | *      | ---     |
| HI    | 1,700             | 94.4    | 100    | 50.0    |
| ID    | 0                 | ---     | 0      | ---     |
| IL    | 100               | 5.3     | 800    | 28.5    |
| IN    | 100               | 5.0     | 100    | 4.3     |
| IA    | 500               | 5.3     | 100    | 1.9     |
| KS    | 100               | 5.0     | 100    | 5.6     |
| KY    | *                 | ---     | *      | ---     |
| LA    | 100               | 25.0    | *      | ---     |
| ME    | 0                 | ---     | *      | ---     |
| MD    | *                 | ---     | *      | ---     |
| MA    | 0                 | ---     | 0      | ---     |
| MI    | *                 | ---     | *      | ---     |
| MN    | 900               | 56.2    | 1,000  | 31.3    |
| MS    | *                 | ---     | *      | ---     |
| MO    | *                 | ---     | 100    | 4.2     |
| MT    | 200               | 2.6     | 100    | 0.5     |
| NE    | 100               | 5.9     | 100    | 2.2     |
| NV    | *                 | ---     | 100    | 0.9     |
| NH    | *                 | ---     | 0      | ---     |
| NJ    | 0                 | ---     | 0      | ---     |
| NM    | 4,900             | 49.0    | 9,300  | 34.3    |
| NY    | *                 | ---     | 0      | ---     |
| NC    | *                 | ---     | *      | ---     |
| ND    | 100               | 5.9     | 100    | 1.9     |
| OH    | 100               | 6.7     | 100    | 3.3     |
| OK    | *                 | ---     | 100    | 2.0     |
| OR    | 100               | 2.0     | 200    | 1.0     |
| PA    | *                 | ---     | *      | ---     |
| RI    | 0                 | ---     | 0      | ---     |
| SC    | 0                 | ---     | 0      | ---     |
| SD    | 100               | 1.0     | 100    | 0.5     |
| TN    | *                 | ---     | 0      | ---     |
| TX    | 4,000             | 14.8    | 13,000 | 16.3    |
| UT    | 300               | 3.2     | 300    | 1.4     |
| VT    | 0                 | ---     | 0      | ---     |
| VA    | *                 | ---     | 100    | 1.9     |
| WA    | *                 | ---     | *      | ---     |
| WV    | *                 | ---     | *      | ---     |
| WI    | *                 | ---     | *      | ---     |
| WY    | 0                 | ---     | 100    | 0.5     |
| US    | 14,700            | 10.3    | 27,600 | 7.9     |

\* Less than 100 head for the State, but number is included in US total.

Losses of Sheep by All Causes and by Predators,  
Number and Total Value, by States, and United States, 1990

| State | All Causes : |           | Losses by Predators |              |
|-------|--------------|-----------|---------------------|--------------|
|       | Sheep        | Sheep     | Per Head            | Total Value  |
|       | Head         | Head      | Dollars             |              |
| AL    | 1/1,000      | 300       | 120                 | 36,000       |
| AZ    | 8,000        | 4,000     | 92                  | 368,000      |
| AR    | 1/1,200      | 200       | 78                  | 15,600       |
| CA    | 32,000       | 9,900     | 85                  | 841,500      |
| CO    | 25,000       | 9,000     | 93                  | 837,000      |
| CT    | 800          | 400       | 115                 | 46,000       |
| DE    | 1/ 2/        | ---       | ---                 | ---          |
| FL    | 1/400        | 200       | 120                 | 24,000       |
| GA    | 1/600        | 200       | 120                 | 24,000       |
| HI    | 1/3,600      | 1,800     | 47                  | 84,600       |
| ID    | 13,000       | 3,600     | 81                  | 291,600      |
| IL    | 7,000        | 1,900     | 84                  | 159,600      |
| IN    | 5,000        | 2,000     | 86                  | 172,000      |
| IA    | 36,000       | 9,400     | 71                  | 667,400      |
| KS    | 9,000        | 2,000     | 62                  | 124,000      |
| KY    | 2,000        | 500       | 77                  | 38,500       |
| LA    | 800          | 400       | 78                  | 31,200       |
| ME    | 700          | 200       | 95                  | 19,000       |
| MD    | 1,000        | 200       | 101                 | 20,200       |
| MA    | 500          | 100       | 120                 | 12,000       |
| MI    | 3,000        | 400       | 77                  | 30,800       |
| MN    | 12,000       | 1,600     | 72                  | 115,200      |
| MS    | 1/500        | 300       | 78                  | 23,400       |
| MO    | 4,500        | 1,000     | 67                  | 67,000       |
| MT    | 40,000       | 7,600     | 76                  | 577,600      |
| NE    | 11,000       | 1,700     | 71                  | 120,700      |
| NV    | 9,000        | 4,500     | 82                  | 369,000      |
| NH    | 700          | 300       | 115                 | 34,500       |
| NJ    | 600          | 2/        | ---                 | ---          |
| NM    | 35,000       | 10,000    | 69                  | 690,000      |
| NY    | 6,000        | 1,000     | 93                  | 93,000       |
| NC    | 1,000        | 600       | 76                  | 45,600       |
| ND    | 9,000        | 1,700     | 77                  | 130,900      |
| OH    | 10,000       | 1,500     | 83                  | 124,500      |
| OK    | 5,000        | 3,000     | 65                  | 195,000      |
| OR    | 19,000       | 5,100     | 58                  | 295,800      |
| PA    | 5,000        | 600       | 85                  | 51,000       |
| RI    | 2/           | 2/        | ---                 | ---          |
| SC    | 2/           | 2/        | ---                 | ---          |
| SD    | 30,000       | 8,700     | 75                  | 652,500      |
| TN    | 1,000        | 300       | 88                  | 26,400       |
| TX    | 92,000       | 27,000    | 59                  | 1,593,000    |
| UT    | 25,000       | 9,300     | 80                  | 744,000      |
| VT    | 600          | 100       | 95                  | 9,500        |
| VA    | 10,000       | 2,500     | 65                  | 162,500      |
| WA    | 3,000        | 400       | 79                  | 31,600       |
| WV    | 4,000        | 900       | 64                  | 57,600       |
| WI    | 5,000        | 500       | 82                  | 41,000       |
| WY    | 29,000       | 5,700     | 75                  | 427,500      |
| US    | 518,500      | 3/142,200 |                     | 3/10,534,850 |

1/ State data not published separately in Production, Disposition, and Income - 1990. 2/ Less than 100 head for the State, but number is included in US total. 3/ Sum of individual State data is 500 head more than US total shown due to rounding at the State level. Sum of individual State data is \$53,175 less than US total shown due to rounding of head at the State level.



Losses of Lambs by All Causes, All Predators, Number and Total Value,  
by States, and United States, 1990

| State | All Causes : |           | Losses by Predators |              |
|-------|--------------|-----------|---------------------|--------------|
|       | Lambs        | Lambs     | Per Head            | Total Value  |
|       | Head         |           | Dollars             |              |
| AL    | 1/1,500      | 400       | 34                  | 13,600       |
| AZ    | 11,000       | 7,500     | 37                  | 277,500      |
| AR    | 1/2,500      | 800       | 34                  | 27,200       |
| CA    | 30,000       | 17,700    | 36                  | 637,200      |
| CO    | 50,000       | 30,500    | 33                  | 1,006,500    |
| CT    | 800          | 100       | 60                  | 6,000        |
| DE    | 1/ 2/        | ---       | ---                 | ---          |
| FL    | 1/600        | 300       | 34                  | 10,200       |
| GA    | 1/1,500      | 300       | 34                  | 10,200       |
| HI    | 1/600        | 200       | 31                  | 6,200        |
| ID    | 16,000       | 7,600     | 29                  | 220,400      |
| IL    | 14,000       | 2,800     | 32                  | 89,600       |
| IN    | 10,000       | 2,300     | 31                  | 71,300       |
| IA    | 53,000       | 5,100     | 32                  | 163,200      |
| KS    | 15,000       | 1,800     | 33                  | 59,400       |
| KY    | 5,000        | 1,200     | 30                  | 36,000       |
| LA    | 3,000        | 300       | 34                  | 10,200       |
| ME    | 1,100        | 400       | 60                  | 24,000       |
| MD    | 3,000        | 300       | 34                  | 10,200       |
| MA    | 1,200        | 2/        | ---                 | ---          |
| MI    | 10,000       | 800       | 33                  | 26,400       |
| MN    | 23,000       | 3,200     | 32                  | 102,400      |
| MS    | 1/900        | 400       | 34                  | 13,600       |
| MO    | 16,100       | 2,400     | 30                  | 72,000       |
| MT    | 40,000       | 23,000    | 29                  | 667,000      |
| NE    | 21,000       | 4,600     | 32                  | 147,200      |
| NV    | 15,000       | 9,200     | 29                  | 266,800      |
| NH    | 1,200        | 200       | 60                  | 12,000       |
| NJ    | 1,000        | 2/        | ---                 | ---          |
| NM    | 35,000       | 27,000    | 30                  | 810,000      |
| NY    | 7,000        | 700       | 35                  | 24,500       |
| NC    | 2,500        | 1,500     | 30                  | 45,000       |
| ND    | 21,000       | 5,300     | 31                  | 164,300      |
| OH    | 28,000       | 3,100     | 33                  | 102,300      |
| OK    | 10,000       | 4,900     | 31                  | 151,900      |
| OR    | 39,000       | 18,800    | 31                  | 582,800      |
| PA    | 12,000       | 600       | 35                  | 21,000       |
| RI    | 1/200        | 2/        | ---                 | ---          |
| SC    | 1/400        | 100       | 30                  | 3,000        |
| SD    | 55,000       | 22,700    | 33                  | 749,100      |
| TN    | 1,200        | 400       | 34                  | 13,600       |
| TX    | 120,000      | 80,000    | 35                  | 2,800,000    |
| UT    | 34,000       | 22,100    | 29                  | 640,900      |
| VT    | 1,500        | 300       | 59                  | 17,700       |
| VA    | 20,000       | 5,500     | 32                  | 176,000      |
| WA    | 7,000        | 1,400     | 32                  | 44,800       |
| WV    | 9,000        | 1,800     | 31                  | 55,800       |
| WI    | 14,000       | 1,300     | 33                  | 42,900       |
| WY    | 45,000       | 26,600    | 30                  | 798,000      |
| US    | 809,900      | 3/347,300 |                     | 3/11,235,625 |

1/ State data not published individually in Meat Animals, Production, Disposition and Income - 1990. 2/ Less than 100 head for the State, but number is included in US total. 3/ Sum of individual State data is 200 head more than US total shown due to rounding at the State level. Sum of individual State data is \$21,600 less than US total shown due to rounding of head data at the State level.

**Losses of Sheep and Lambs by Specific Predators and Total Value,  
by Regions, and United States, 1990**

| Region         | Total Predator Losses |         |                                    | Coyotes        |         |                                    |
|----------------|-----------------------|---------|------------------------------------|----------------|---------|------------------------------------|
|                | Sheep                 | Lambs   | Total Sheep:<br>and Lambs<br>Value | Sheep          | Lambs   | Total Sheep:<br>and Lambs<br>Value |
|                | Head                  | Head    | Dollars                            | Head           | Head    | Dollars                            |
| Mtn and West   | 115,000               | 310,700 | 18,405,825                         | 75,100         | 209,400 | 12,250,600                         |
| Midwest        | 18,500                | 21,900  | 2,083,775                          | 8,100          | 10,700  | 933,800                            |
| South and East | 8,700                 | 14,700  | 1,206,100                          | 1,300          | 7,300   | 371,100                            |
| US             | 142,200               | 347,300 | 21,695,700                         | 84,500         | 227,400 | 13,555,500                         |
|                | Dogs                  |         |                                    | Mountain Lions |         |                                    |
|                | Sheep                 | Lambs   | Total Sheep:<br>and Lambs<br>Value | Sheep          | Lambs   | Total Sheep:<br>and Lambs<br>Value |
|                | Head                  | Head    | Dollars                            | Head           | Head    | Dollars                            |
| Mtn and West   | 14,700                | 22,700  | 1,812,075                          | 6,500          | 10,300  | 814,875                            |
| Midwest        | 8,400                 | 8,500   | 922,950                            | 0              | 0       | 0                                  |
| South and East | 6,300                 | 5,800   | 689,850                            | 0              | 0       | 0                                  |
| US             | 29,400                | 37,000  | 3,424,875                          | 6,500          | 10,300  | 814,875                            |

Losses of Sheep and Lambs by Specific Predators and Total Value,  
by Regions, and United States, 1990

| Region         | Bears  |        |                                    | Foxes   |        |                                    |
|----------------|--------|--------|------------------------------------|---------|--------|------------------------------------|
|                | Sheep  | Lambs  | Total Sheep:<br>and Lambs<br>Value | Sheep   | Lambs  | Total Sheep:<br>and Lambs<br>Value |
|                | Head   | Head   | Dollars                            | Head    | Head   | Dollars                            |
| Mtn and West   | 3,500  | 3,800  | 411,400                            | 800     | 11,400 | 429,700                            |
| Midwest        | *      | 100    | 9,075                              | 0       | *      | 1,650                              |
| South and East | 300    | 200    | 34,000                             | *       | 400    | 20,200                             |
| US             | 3,900  | 4,100  | 454,475                            | 900     | 11,900 | 451,550                            |
|                | Eagles |        |                                    | Bobcats |        |                                    |
|                | Sheep  | Lambs  | Total Sheep:<br>and Lambs<br>Value | Sheep   | Lambs  | Total Sheep:<br>and Lambs<br>Value |
|                | Head   | Head   | Dollars                            | Head    | Head   | Dollars                            |
| Mtn and West   | 1,100  | 16,100 | 604,075                            | 1,000   | 12,400 | 489,225                            |
| Midwest        | 0      | 100    | 3,300                              | 0       | 0      | 0                                  |
| South and East | *      | 300    | 15,125                             | *       | *      | 4,525                              |
| US             | 1,200  | 16,500 | 622,500                            | 1,100   | 12,500 | 493,750                            |

\* Less than 100 head for the region, but the number is included in the US total.

**Losses of Sheep and Lambs by Specific Predators and Total Value,  
by Regions, and United States, 1990**

| Region                     | All Other Animals |        |  | Sheep<br>and Lambs<br>Value |
|----------------------------|-------------------|--------|--|-----------------------------|
|                            | Sheep             | Lambs  |  |                             |
|                            | Head              |        |  | Dollars                     |
| Mountain<br>and<br>Western | 12,300            | 24,600 |  | 1,593,875                   |
| Midwest                    | 1,800             | 2,400  |  | 213,000                     |
| Southern<br>and<br>Eastern | 600               | 600    |  | 71,300                      |
| US                         | 14,700            | 27,600 |  | 1,878,175                   |

**Losses of All Goats (Angora and Other) by Specific  
Predators and Total Value, 5-State Total, 1990**

| Predator          | Goats  | Predator             | Goats   | Total Value |
|-------------------|--------|----------------------|---------|-------------|
|                   | Head   |                      | Head    | Dollars     |
| Coyotes           | 64,900 | Eagles               | 16,300  |             |
| Dogs              | 9,700  | Bobcats              | 20,600  |             |
| Mountain<br>Lions | 2,900  | All Other<br>Animals | 10,900  |             |
| Bears             | 0      |                      |         |             |
| Foxes             | 4,100  | 5-State<br>Total     | 129,400 | 5,661,250   |
