# Supplementary material for: The Elephant in the room: What can we learn from California regarding the use of sport hunting of pumas (Puma concolor) as a management tool?
Source: PLOS journal article supplement (doi:10.1371/journal.pone.0224638), 2020-02-13
Supplement: S3 (10.1371/journal.pone.0224638.s003) [file journal.pone.0224638.s003]

# California Agricultural Statistics 2002

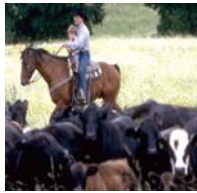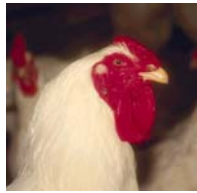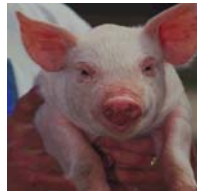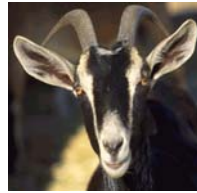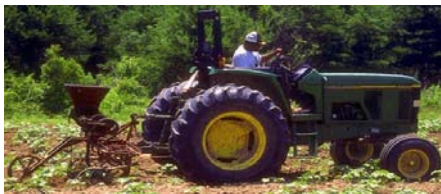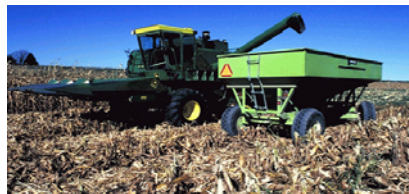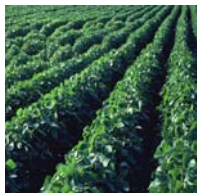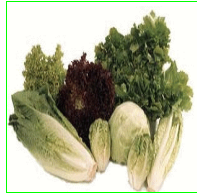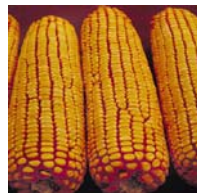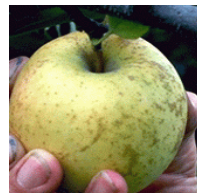

October 2003



## TABLE OF CONTENTS

| <u>CHAPTER</u>                                                          | <u>PAGE</u> |
|-------------------------------------------------------------------------|-------------|
| California Agricultural Overview .....                                  | 1           |
| California Field Crops .....                                            | 11          |
| California Floriculture .....                                           | 33          |
| California Fruit and Nut Crops .....                                    | 37          |
| California Livestock and Dairy .....                                    | 61          |
| California Vegetables and Melons .....                                  | 75          |
| California County Agricultural Commissioners .....                      | 86          |
| California Agricultural Statistics Service Publication Order Form ..... | 99          |

Compiled by:

CALIFORNIA AGRICULTURAL STATISTICS SERVICE

650 Capitol Mall, Suite 6-100  
P.O. Box 1258  
Sacramento, California 95812-1258  
Phone: (916) 498-5161  
Fax: (916) 498-5186

Vic Tolomeo, Director  
Jack Rutz, Deputy Director

October 2003

*California Agricultural Statistics Service  
publications are available  
on the Internet at:*

*<http://www.nass.usda.gov/ca>*

# California Agricultural Overview

The Golden State is, by far, the number-one agricultural producer and exporter in the United States. No other state in the union even comes close. In fact, last year the agricultural marketings of California's farmers and ranchers reached \$27.5 billion.

## Top 5 Agricultural States in Cash Receipts, 2002

| State      | Rank | Total Value<br>(Billion Dollars) |
|------------|------|----------------------------------|
| California | 1    | 26.1                             |
| Texas      | 2    | 12.7                             |
| Iowa       | 3    | 10.8                             |
| Nebraska   | 4    | 9.6                              |
| Kansas     | 5    | 7.9                              |

California produces one out of every five glasses of milk consumed in the nation. The dairy industry continues to grow at an astonishing rate with milk production jumping 5 percent from 2001 to 2002. It follows then, that California also has some of the largest dairies in the country with more than 700 cows on average, while the United States average is less than 100. In 2002, the average milk production per cow in California was 21,180 pounds, which is 14 percent higher than the national average.

California produces most of the grapes grown in the United States. Warm days and cool nights are very favorable to grapes, so it comes as no surprise that California now produces many of the best wines in the world. In 2002, 91 percent of all grapes (raisin, table and wine) came from right here in the Golden State.

California's agricultural abundance includes 350 different crops. Among those, the state grows more than half of the nation's total of fruits, nuts and vegetables. Many of these commodities are specialty crops and almost solely produced in California. It will be hard to find these crops growing in any other state—artichokes, Brussels sprouts, almonds, dates, figs, kiwifruit, nectarines, olives, pistachios, dried plums (prunes) and walnuts.

## California's Gross Cash Income for 2002

Agricultural production and gross cash income in 2002 increased to \$27.5 billion, this is 2 percent lower than the previous year. Cash receipts from farm marketings totaled \$26.1 billion, down 1 percent from 2001, while other farm related income totaled \$1.37 billion.

Fruit and nut cash receipts, at \$7.86 billion, were 10 percent above last year and comprised 29 percent of the total. Vegetable receipts increased 1 percent from \$6.15 billion in 2001 to \$6.21 billion in 2002 and comprised 23 percent of the total. Livestock and poultry receipts fell 15 percent and comprised 23 percent of the total. Nursery and flower crops, with 11 percent of the total, were down 4 percent from last year. Field crops accounted for 10 percent of the total, and cash receipts jumped 6 percent from the previous year.

The Golden State's two leading commodities in cash receipts are milk with \$3.81 billion and grapes with \$2.58 billion. Nationally, California has about 21 percent of the total milk receipts and 91 percent of the grape receipts.

## Notable Increases in Marketings:

|                         |      |
|-------------------------|------|
| Alfalfa Seed            | 47%  |
| Almonds                 | 61%  |
| Dates                   | 37%  |
| Figs                    | 20%  |
| Honey                   | 58%  |
| Lemons                  | 21%  |
| Oats                    | 149% |
| Peaches, Clingstone     | 21%  |
| Pecans                  | 61%  |
| Pistachios              | 107% |
| Plums                   | 21%  |
| Potatoes (Except Sweet) | 71%  |
| Spinach                 | 29%  |
| Strawberries            | 20%  |
| Tomatoes, Processing    | 27%  |
| Wheat                   | 28%  |
| Wool                    | 25%  |

## Significant Decreases in Marketings:

|                       |     |
|-----------------------|-----|
| Asparagus             | 29% |
| Barley                | 28% |
| Olives                | 33% |
| Plums, Dried (Prunes) | 30% |
| Rice                  | 29% |
| Turkeys               | 25% |
| Walnuts               | 40% |

## California Farm Facts

California has 84,000 farming operations. This number represents less than 4 percent of the nation's total; however, these farms account for 14 percent of the national gross cash receipts from farming. In 2002, land in farms totaled 27.7 million acres. Average farm size in California is 330 acres. Some 350 crops are recognized in the state, including seeds, flowers, and ornamentals.

## Crop and Livestock Commodities in which California Leads the Nation

|                       |                        |                            |                            |
|-----------------------|------------------------|----------------------------|----------------------------|
| <b>Almonds</b>        | <b>Figs</b>            | Melons, Honeydew           | Plums                      |
| Apricots              | Flowers, Bulbs         | Melons, Persian            | <b>Plums, Dried</b>        |
| <b>Artichokes</b>     | Flowers, Cut           | Milk                       | Pomegranates               |
| Asparagus             | Flowers, Potted Plants | Milk, Goat                 | Rabbits                    |
| Avocados              | Garlic                 | <b>Nectarines</b>          | Rice, Sweet                |
| Beans, Black-eyed     | <b>Grapes, Raisins</b> | Nursery, Bedding Plants    | Safflower                  |
| Beans, Dry Baby Lima  | Grapes, Table          | Nursery Crops              | Seed, Alfalfa              |
| Beans, Dry Large Lima | Grapes, Wine           | <b>Olives</b>              | Seed, Bermuda Grass        |
| Beans, Garbanzo       | Hay, Alfalfa           | Onions                     | Seed, Ladino Clover        |
| Broccoli              | Herbs                  | Onions, Green              | Seed, Sudan Grass          |
| Brussels Sprouts      | Kale                   | Parsley                    | Seed, Vegetable and Flower |
| Cabbage, Chinese      | <b>Kiwifruit</b>       | <b>Peaches, Clingstone</b> | Spinach                    |
| Carrots               | Lemons                 | Peaches, Freestone         | Strawberries               |
| Cauliflower           | Lettuce, Head          | Pears, Bartlett            | Tomatoes, Processing       |
| Celery                | Lettuce, Leaf          | Peas, Chinese              | Vegetables, Greenhouse     |
| Chicory               | Lettuce, Romaine       | Peppers, Bell              | Vegetables, Oriental       |
| Currants              | Melons, Cantaloupe     | <b>Persimmons</b>          | <b>Walnuts</b>             |
| <b>Dates</b>          | Melons, Casaba         | Pigeons and Squabs         |                            |
| Escarole/Endive       | Melons, Crenshaw       | <b>Pistachios</b>          |                            |

*California is the sole producer (99% or more) of the commodities in bold.*

### California's Top 20 Commodities

California's top 20 crop and livestock commodities account for 74 percent of the state's gross farm income. Milk and cream production remained number one in 2002, followed by grapes and nursery products.

### Leading Counties

California has some of the most agriculturally productive counties in the nation. According to the 1997 Census of Agriculture's ranking of market value of agricultural products sold, eight of the nation's top 10 producing counties are in California.

Fresno regained the number one spot from Tulare as the leading county in the nation, and in 2002 reached \$3.42 billion in agricultural value. A large share of Tulare's agricultural productivity comes from milk and cream, which showed a big decrease in 2002. Fresno's number one commodity is grapes and the value jumped 17 percent from 2001. If ranked separately, the value of agricultural commodities in Fresno County would rank it ahead of more than half the other states in the nation.

### California's Top 20 Commodities for 2000-2002

| Commodity         | Value and Rank |      |           |      |           |      |
|-------------------|----------------|------|-----------|------|-----------|------|
|                   | 2000           |      | 2001      |      | 2002      |      |
|                   | \$1,000        |      |           |      |           |      |
| Milk and Cream    | 3,707,255      | (1)  | 4,625,431 | (1)  | 3,812,371 | (1)  |
| Grapes, All       | 2,828,545      | (2)  | 2,658,587 | (2)  | 2,578,854 | (2)  |
| Nursery           | 2,247,256      | (3)  | 2,107,711 | (3)  | 2,347,697 | (3)  |
| Lettuce, All      | 1,494,114      | (4)  | 1,344,551 | (5)  | 1,277,895 | (4)  |
| Cattle and Calves | 1,218,220      | (5)  | 1,353,837 | (4)  | 1,228,722 | (5)  |
| Almonds           | 666,487        | (11) | 740,012   | (10) | 1,189,870 | (6)  |
| Strawberries      | 839,926        | (8)  | 826,478   | (8)  | 990,583   | (7)  |
| Flowers           | 931,267        | (7)  | 985,795   | (7)  | 948,629   | (8)  |
| Tomatoes, All     | 948,469        | (6)  | 752,282   | (9)  | 925,775   | (9)  |
| Hay, All          | 768,978        | (9)  | 1,018,989 | (6)  | 913,509   | (10) |
| Cotton, All       | 719,502        | (10) | 615,986   | (11) | 623,466   | (11) |
| Oranges, All      | 345,654        | (14) | 514,460   | (13) | 558,843   | (12) |
| Broccoli          | 573,562        | (12) | 439,387   | (14) | 488,442   | (13) |
| Carrots, All      | 322,455        | (17) | 433,919   | (15) | 459,838   | (14) |
| Chickens, All     | 471,081        | (13) | 532,452   | (12) | 452,353   | (15) |
| Avocados          | 339,594        | (15) | 315,842   | (17) | 358,000   | (16) |
| Pistachios        | 245,430        | (22) | 162,610   | (31) | 336,330   | (17) |
| Potatoes, All     | 209,455        | (28) | 184,411   | (26) | 307,024   | (18) |
| Walnuts           | 296,360        | (18) | 341,600   | (16) | 304,560   | (19) |
| Lemons            | 253,876        | (20) | 212,725   | (22) | 287,026   | (20) |

### California's Top 10 Agricultural Counties

| County      | Total Value |      |           |      | Leading Commodities                                             |
|-------------|-------------|------|-----------|------|-----------------------------------------------------------------|
|             | 2001        |      | 2002      |      |                                                                 |
|             | \$1,000     |      |           |      |                                                                 |
| Fresno      | 3,215,185   | (2)  | 3,415,591 | (1)  | Grapes, Cotton, Poultry, Tomatoes, Milk                         |
| Tulare      | 3,474,470   | (1)  | 3,200,552 | (2)  | Milk, Oranges, Grapes, Cattle and Calves, Peaches               |
| Monterey    | 2,746,244   | (3)  | 2,812,069 | (3)  | Lettuce, Broccoli, Strawberries, Nursery Products, Grapes       |
| Kern        | 2,221,659   | (4)  | 2,586,247 | (4)  | Grapes, Citrus, Carrots, Almonds, Milk                          |
| Merced      | 1,703,039   | (5)  | 1,730,720 | (5)  | Milk, Chickens, Almonds, Cattle and Calves, Tomatoes            |
| San Joaquin | 1,353,300   | (7)  | 1,367,971 | (6)  | Milk, Grapes, Tomatoes, Almonds, Walnuts                        |
| Stanislaus  | 1,389,876   | (6)  | 1,343,808 | (7)  | Milk, Almonds, Chickens, Cattle and Calves, Fruit and Nut Crops |
| San Diego   | 1,289,699   | (8)  | 1,297,258 | (8)  | Flowers, Nursery Products, Avocados, Eggs, Tomatoes             |
| Riverside   | 1,010,321   | (11) | 1,224,109 | (9)  | Milk, Nursery Products, Table Grapes, Eggs, Hay                 |
| Ventura     | 1,053,636   | (10) | 1,161,070 | (10) | Strawberries, Lemons, Nursery Stock, Celery, Avocados           |

### Weather Highlights for 2002

In California, the 2002 season started with cooler than normal temperatures and above normal rainfall in January in the Sacramento and San Joaquin valleys, but below normal precipitation in the coastal and southern California areas. Growers performed the needed cultural practices as weather permitted. Cold temperatures late in January helped ease growers' concerns over lack of chilling hours required for most tree fruit, but also slowed the growth of some vegetables and there were reports of some lettuce damaged by frost.

Warmer temperatures in late February encouraged plant growth of the winter vegetables and harvesting resumed. Seasonal storms brought rain to the valleys, but precipitation remained below normal in the central and south coast, as well as the desert areas. Almonds began blooming in late February and were in full bloom by early March. A freeze in mid-March damaged the almonds and the crop was reduced significantly in the Arbuckle area of the Sacramento Valley. Harvesting of winter vegetables continued in the desert areas and then moved into the San Joaquin Valley. As March began, a strong high-pressure ridge aloft and an offshore flow at the lower levels of the atmosphere dominated weather conditions. This condition resulted in very dry, warm daytime conditions and cool nights. Warmer weather in March and April accelerated plant growth and pollination in orchards and vineyards. Weather conditions during the summer months were relatively mild with no extreme temperatures. Fall temperatures were also mild, which allowed harvesting of most crops to remain on schedule with few problems.

Cotton planting began in late April and early May and progressed very well. Cool spells during the spring initially slowed growth in some areas, but warm weather during the summer helped the crop progress well with good plant growth and boll retention. In general, insect pressure

was light during the year. Harvesting of Upland cotton began in the Imperial Valley in mid-September, with picking following in the San Joaquin Valley by late September and early October. Harvest of American Pima cotton began in early October and progressed well with most of the crop harvested by early December.

Weather conditions for rice were also very favorable and provided for excellent yields. Dry conditions in southern California prevented or delayed planting of the wheat crop and production from that area was down. Rains in the Sacramento Valley during late May caused some quality problems for wheat, but overall quality of the crop was good.

### Global Marketplace

California is the nation's leader in agricultural exports, annually shipping more than \$6.50 billion in both food and agricultural commodities around the world. To highlight the significance of this figure, it is estimated that 14 percent of California's agricultural production is exported.

In terms of foreign markets, Canada remained the largest destination for California agriculture. Japan was surpassed by the European Union in 2002 and is now the third largest export destination for California agriculture. Collectively, Canada, the European Union, and Japan represent nearly 50 percent of the agricultural exports from the Golden State.

With key international markets in Asia, Europe, and North America, as shown in these two tables, California agriculture is clearly enjoyed around the world.

# **Cash Income by Commodity Groups, 2000-2002**

| Source of Income                     | 2000      | 2001      | 2002      |
|--------------------------------------|-----------|-----------|-----------|
|                                      | \$1,000   |           |           |
| FIELD CROPS                          |           |           |           |
| Alfalfa Seed                         | 43,096    | 20,435    | 30,000    |
| Barley                               | 18,177    | 16,579    | 11,897    |
| Beans, Dry                           | 61,509    | 53,086    | 51,421    |
| Corn for Grain                       | 59,427    | 56,508    | 57,740    |
| Cotton Lint                          | 480,036   | 582,371   | 623,462   |
| Cottonseed                           | 98,926    | 94,411    | 81,972    |
| Grain, Sorghum                       | 659       | 1,459     | 2,343     |
| Hay, All                             | 473,619   | 592,918   | 575,483   |
| Oats                                 | 1,732     | 1,383     | 3,440     |
| Oil Crops                            | 38,258    | 28,209    | 26,371    |
| Potatoes (Excl. Sweet)               | 210,101   | 177,316   | 302,520   |
| Potatoes, Sweet                      | 63,263    | 61,870    | 72,342    |
| Rice                                 | 152,812   | 265,041   | 187,218   |
| Sugar Beets                          | 95,608    | 53,306    | 62,191    |
| Wheat                                | 79,978    | 87,528    | 112,249   |
| Other Seed Crops                     | 149,920   | 132,073   | 137,934   |
| Other Field Crops                    | 311,725   | 345,306   | 383,725   |
| TOTAL                                | 2,338,847 | 2,569,799 | 2,722,309 |
| Percent of Gross Cash Income         | 8.6       | 9.1       | 9.9       |
| FRUIT AND NUT CROPS                  |           |           |           |
| Almonds                              | 666,487   | 740,012   | 1,189,870 |
| Apples                               | 120,260   | 76,953    | 91,723    |
| Apricots                             | 26,679    | 22,330    | 22,964    |
| Avocados                             | 337,890   | 318,793   | 355,324   |
| Berries, Bushberries                 | 61,563    | 56,521    | 54,723    |
| Berries, Strawberries                | 800,334   | 826,478   | 990,583   |
| Cherries                             | 71,564    | 79,814    | 93,315    |
| Dates                                | 22,872    | 25,498    | 34,938    |
| Figs                                 | 15,226    | 15,012    | 18,012    |
| Grapefruit                           | 57,608    | 55,333    | 58,128    |
| Grapes                               | 2,832,692 | 2,659,343 | 2,578,753 |
| Kiwifruit                            | 13,888    | 15,340    | 18,097    |
| Lemons                               | 243,311   | 244,106   | 295,760   |
| Nectarines                           | 106,256   | 127,642   | 114,517   |
| Olives                               | 34,768    | 90,048    | 60,475    |
| Oranges, Navel and Miscellaneous     | 383,862   | 391,886   | 371,558   |
| Oranges, Valencia                    | 160,086   | 165,886   | 165,886   |
| Peaches, Clingstone                  | 127,125   | 110,044   | 132,639   |
| Peaches, Freestone                   | 124,484   | 136,699   | 138,369   |
| Pears                                | 71,587    | 72,282    | 68,265    |
| Pecans                               | 5,168     | 2,997     | 4,826     |
| Pistachios                           | 245,430   | 162,610   | 336,330   |
| Plums                                | 87,115    | 64,362    | 77,586    |
| Plums, Dried (Prunes)                | 95,100    | 146,195   | 102,647   |
| Tangerines                           | 21,731    | 33,145    | 39,274    |
| Walnuts                              | 296,360   | 341,600   | 204,560   |
| Other Fruits and Nuts                | 143,446   | 144,110   | 140,700   |
| TOTAL                                | 7,172,892 | 7,125,039 | 7,859,822 |
| Percent of Gross Cash Income         | 26.3      | 25.3      | 28.6      |
| CHRISTMAS TREES                      |           |           |           |
| TOTAL                                | 10,669    | 10,345    | 10,500    |
| Percent of Gross Cash Income         | 0.01      | 0.01      | 0.01      |
| NURSERY, GREENHOUSE AND FLORICULTURE |           |           |           |
| TOTAL                                | 3,115,620 | 3,176,410 | 3,061,859 |
| Percent of Gross Cash Income         | 11.5      | 11.3      | 11.1      |

| Source of Income                  | 2000       | 2001       | 2002       |
|-----------------------------------|------------|------------|------------|
|                                   | \$1,000    |            |            |
| VEGETABLE CROPS                   |            |            |            |
| Artichokes                        | 61,021     | 58,559     | 66,764     |
| Asparagus                         | 144,448    | 163,800    | 116,280    |
| Beans, Green Lima                 | 13,014     | 13,214     | 13,760     |
| Beans, Snap, All                  | 33,311     | 30,656     | 36,633     |
| Broccoli, All                     | 575,349    | 439,387    | 488,442    |
| Brussels Sprouts                  | 16,115     | 14,471     | N/A        |
| Cabbage                           | 63,011     | 62,928     | 66,500     |
| Carrots, All                      | 322,455    | 433,919    | 459,838    |
| Cauliflower                       | 211,087    | 167,504    | 167,491    |
| Celery                            | 324,850    | 255,841    | 227,130    |
| Corn, Sweet                       | 66,132     | 83,402     | 97,920     |
| Cucumbers, All                    | 49,514     | 48,252     | 40,007     |
| Garlic                            | 140,447    | 160,420    | 138,146    |
| Lettuce                           | 1,494,114  | 1,344,551  | 1,277,895  |
| Melons, Cantaloupe                | 226,148    | 252,372    | 223,287    |
| Melons, Honeydew                  | 68,820     | 72,890     | 63,403     |
| Melons, Watermelon                | 76,998     | 68,169     | 76,429     |
| Mushrooms                         | 162,811    | 166,313    | 170,666    |
| Onions                            | 223,234    | 246,072    | 219,222    |
| Peppers, Chili                    | 28,165     | 17,697     | 17,914     |
| Peppers, Green                    | 171,788    | 182,343    | 197,987    |
| Pumpkins                          | 19,080     | 16,397     | 16,350     |
| Spinach, All                      | 115,524    | 94,126     | 121,501    |
| Squash                            | 29,951     | 28,060     | 33,049     |
| Tomatoes, Fresh                   | 345,680    | 255,474    | 293,370    |
| Tomatoes, Processing              | 602,789    | 496,808    | 632,403    |
| Other Vegetable Crops             | 948,534    | 979,292    | 948,130    |
| TOTAL                             | 6,534,390  | 6,152,917  | 6,210,517  |
| Percent of Gross Cash Income      | 24.0       | 21.9       | 22.6       |
| LIVESTOCK, POULTRY AND PRODUCTS   |            |            |            |
| Aquaculture                       | 13,738     | 14,385     | 12,966     |
| Cattle and Calves                 | 1,218,220  | 1,353,837  | 1,228,722  |
| Chickens, All                     | 471,081    | 532,452    | 452,353    |
| Eggs                              | 237,561    | 235,921    | 200,051    |
| Hogs                              | 35,563     | 26,853     | 22,188     |
| Honey                             | 18,172     | 19,061     | 30,083     |
| Milk and Cream                    | 3,707,255  | 4,625,431  | 3,812,371  |
| Sheep and Lambs                   | 58,156     | 52,975     | 50,388     |
| Turkeys                           | 210,816    | 211,815    | 158,026    |
| Wool                              | 1,160      | 1,313      | 1,643      |
| Other                             |            |            |            |
| Livestock/Poultry                 | 280,346    | 269,012    | 272,841    |
| TOTAL                             | 6,252,068  | 7,343,055  | 6,241,632  |
| Percent of Gross Cash Income      | 23.0       | 26.1       | 22.7       |
| TOTAL CASH INCOME FROM MARKETINGS |            |            |            |
| TOTAL                             | 25,424,486 | 26,377,565 | 26,106,639 |
| FARM RELATED INCOME               |            |            |            |
| TOTAL                             | 1,758,075  | 1,742,305  | 1,371,347  |
| Percent of Gross Cash Income      | 6.5        | 6.2        | 5.0        |
| GROSS CASH INCOME FROM FARMING 1/ |            |            |            |
| TOTAL                             | 27,182,561 | 28,119,870 | 27,477,986 |

1/ Includes value of home consumption, value of inventory adjustments, machine hire and custom work, forest products sold, rental value of farm dwelling, government payments, and other miscellaneous farm income.

**Source: USDA Economic Research Service**



**Farm Income Indicators, 1998-2002 1/**

| Item                                            | 1998              | 1999              | 2000              | 2001              | 2002              |
|-------------------------------------------------|-------------------|-------------------|-------------------|-------------------|-------------------|
|                                                 | \$1,000           |                   |                   |                   |                   |
| <b>Value of Crop Production</b>                 | 17,458,369        | 18,507,449        | 19,443,171        | 19,062,870        | 19,686,544        |
| Food grains                                     | 453,770           | 387,309           | 232,790           | 352,569           | 299,467           |
| Feed crops                                      | 535,584           | 515,038           | 553,613           | 668,847           | 650,904           |
| Cotton                                          | 950,142           | 667,703           | 578,961           | 676,782           | 705,434           |
| Oil crops                                       | 51,605            | 44,735            | 38,261            | 28,209            | 26,371            |
| Tobacco                                         | ---               | ---               | ---               | ---               | ---               |
| Fruits and tree nuts                            | 6,536,089         | 6,640,438         | 7,172,890         | 7,121,820         | 7,748,106         |
| Vegetables                                      | 5,802,199         | 6,272,068         | 6,698,937         | 6,270,933         | 6,458,121         |
| All other crops                                 | 3,405,813         | 3,731,261         | 3,896,964         | 3,912,132         | 3,864,889         |
| Home consumption                                | 5,935             | 5,802             | 5,704             | 5,835             | 5,734             |
| Value of inventory adjustment 2/                | (282,768)         | 243,095           | 265,051           | 25,743            | (72,482)          |
| <b>Value of Livestock Production</b>            | 6,697,288         | 6,680,857         | 6,304,198         | 7,392,857         | 6,299,978         |
| Meat animals                                    | 1,127,393         | 1,308,778         | 1,311,939         | 1,433,665         | 1,301,298         |
| Dairy products                                  | 4,140,659         | 4,090,952         | 3,707,255         | 4,625,431         | 3,812,371         |
| Poultry and eggs                                | 1,048,318         | 1,027,944         | 978,700           | 1,021,942         | 864,217           |
| Miscellaneous livestock                         | 214,643           | 241,409           | 254,174           | 262,017           | 263,746           |
| Home consumption                                | 11,266            | 11,798            | 10,341            | 10,861            | 10,582            |
| Value of inventory adjustment 2/                | 155,009           | (24)              | 41,789            | 38,941            | 47,764            |
| <b>Revenues from Services and Forestry</b>      | 1,487,751         | 1,570,263         | 1,435,192         | 1,664,143         | 1,491,464         |
| Machine hire and custom work                    | 282,648           | 292,721           | 374,381           | 277,185           | 288,566           |
| Forest products sold                            | 3,300             | 5,593             | 4,738             | 7,801             | 6,500             |
| Other farm income                               | 533,317           | 633,778           | 413,498           | 686,476           | 511,478           |
| Gross imputed rental value of farm dwellings    | 668,486           | 638,171           | 642,575           | 692,681           | 684,920           |
| <b>VALUE OF AGRICULTURAL SECTOR PRODUCTION</b>  | <b>25,643,408</b> | <b>26,758,569</b> | <b>27,182,561</b> | <b>28,119,870</b> | <b>27,477,986</b> |
| <b>less: Purchased Inputs</b>                   | 12,838,986        | 13,680,281        | 13,912,488        | 15,314,628        | 14,461,294        |
| <b>Farm Origin</b>                              | 3,368,593         | 3,712,901         | 4,045,816         | 4,059,961         | 3,919,111         |
| Feed purchased                                  | 2,244,843         | 2,421,837         | 2,688,975         | 2,547,856         | 2,520,981         |
| Livestock and poultry purchased                 | 420,504           | 565,608           | 601,774           | 623,793           | 539,424           |
| Seed purchased                                  | 703,246           | 725,456           | 755,067           | 888,312           | 858,706           |
| <b>Manufactured Inputs</b>                      | 2,778,867         | 2,857,558         | 2,941,395         | 3,259,384         | 2,772,825         |
| Fertilizers and lime                            | 763,324           | 750,646           | 804,669           | 812,009           | 719,322           |
| Pesticides                                      | 1,068,372         | 1,016,436         | 964,504           | 1,038,689         | 934,821           |
| Petroleum fuel and oils                         | 434,110           | 488,116           | 573,710           | 540,610           | 506,513           |
| Electricity                                     | 513,061           | 602,360           | 598,512           | 868,076           | 612,169           |
| <b>Other Purchased Inputs</b>                   | 6,691,526         | 7,109,822         | 6,925,277         | 7,995,283         | 7,769,358         |
| Repair and maintenance of capital items         | 761,997           | 844,442           | 861,274           | 769,754           | 769,965           |
| Machine hire and custom work                    | 1,109,142         | 1,048,453         | 788,486           | 747,945           | 1,211,950         |
| Marketing, storage, and transportation expenses | 1,422,240         | 1,635,112         | 1,900,769         | 2,134,752         | 1,832,223         |
| Contract labor                                  | 1,071,584         | 1,166,784         | 1,149,140         | 1,643,763         | 1,552,647         |
| Miscellaneous expenses                          | 2,326,563         | 2,415,031         | 2,225,608         | 2,699,069         | 2,402,573         |
| <b>plus: Net Government Transactions</b>        | (225,965)         | 65,918            | 66,921            | (27,500)          | (137,402)         |
| + Direct Government payments                    | 357,340           | 668,501           | 667,466           | 586,761           | 451,495           |
| - Motor vehicle registration and licensing fees | 41,172            | 43,067            | 37,743            | 41,581            | 29,379            |
| - Property taxes                                | 542,133           | 559,516           | 562,802           | 572,680           | 559,518           |
| <b>Gross Value Added</b>                        | 12,578,457        | 13,144,206        | 13,336,993        | 12,777,742        | 12,879,290        |
| <b>less: Capital Consumption</b>                | 1,034,134         | 1,015,830         | 1,003,457         | 1,017,925         | 1,044,326         |
| <b>Net Value Added</b>                          | 11,544,324        | 12,128,376        | 12,333,536        | 11,759,817        | 11,834,964        |
| <b>less: Payments to Stakeholders</b>           | 5,988,411         | 6,640,534         | 6,845,820         | 6,667,935         | 6,749,972         |
| Employee compensation (total hired labor)       | 4,237,847         | 4,865,338         | 4,956,621         | 4,948,075         | 4,996,603         |
| Net rent received by non-operator landlords     | 470,083           | 462,610           | 463,311           | 395,150           | 444,957           |
| Real estate and non-real estate interest        | 1,280,481         | 1,312,586         | 1,425,888         | 1,324,710         | 1,308,412         |
| <b>NET FARM INCOME</b>                          | <b>5,555,913</b>  | <b>5,487,842</b>  | <b>5,487,716</b>  | <b>5,091,882</b>  | <b>5,084,992</b>  |

- 1/ Value of agricultural sector production is the gross value of commodities and services produced within a year. Net value-added is the sector's contribution to the national economy and is the sum of the income from production earned by all factors-of-production, regardless of ownership. Net farm income is the farm operators' share of income from the sector's production activities. The concept presented is consistent with that employed by the Organization for Economic Cooperation and Development.
- 2/ A positive value of inventory change represents current-year production not sold by December 31. A negative value is an offset to production from prior years included in current-year sales.

**Source: USDA Economic Research Service**

**Commodity Rank, Acreage, Production, Value and Leading Producing Counties, 2002**

| Commodity                            | U.S.<br>Rank<br>1/ | CA<br>Share of<br>U.S.<br>Prod. | Area<br>Harvested | Short Tons<br>(2,000<br>Lbs.) | Total<br>Value 2/ | California<br>Rank |      | Harvest<br>Season | Leading Counties 3/                                         |
|--------------------------------------|--------------------|---------------------------------|-------------------|-------------------------------|-------------------|--------------------|------|-------------------|-------------------------------------------------------------|
|                                      | Number             | Percent                         | 1,000<br>Acres    | 1,000 Tons                    | \$1,000           | 2001               | 2002 |                   |                                                             |
|                                      |                    |                                 |                   |                               |                   | Number             |      |                   |                                                             |
| VEGETABLES                           |                    |                                 |                   |                               |                   |                    |      |                   |                                                             |
| TOTAL VALUE -- \$6,209,017,000       |                    |                                 |                   |                               |                   |                    |      |                   |                                                             |
| Artichokes 4/                        | 1                  | 99                              | 8.2               | 47.2                          | 66,764            | 49                 | 45   | Continuous        | Monterey, Riverside, San Mateo, Orange                      |
| Asparagus                            | 1                  | 55                              | 34.0              | 51.0                          | 116,280           | 29                 | 33   | Feb. 15-June 30   | San Joaquin, Monterey, Imperial, Fresno                     |
| Beans, Fresh Market Snap             | 4                  | 9                               | 6.5               | 26.0                          | 32,396            | 59                 | 58   | Apr. 20-Dec. 15   | Orange, San Diego, Santa Clara, San Luis Obispo             |
| Broccoli                             | 1                  | 92                              | 115.0             | 805.0                         | 488,442           | 14                 | 13   | Continuous        | Monterey, Santa Barbara, San Luis Obispo, Imperial, Fresno  |
| Cabbage, Fresh Market                | 1                  | 19                              | 12.5              | 237.5                         | 66,500            | 47                 | 46   | Continuous        | Ventura, Santa Barbara, Monterey, San Luis Obispo, Imperial |
| Carrots                              | 1                  | 76                              | 79.1              | 1,176.8                       | 459,838           | 15                 | 14   | Continuous        | Kern, Imperial, Monterey, Riverside                         |
| Cauliflower                          | 1                  | 86                              | 37.0              | 277.5                         | 167,491           | 27                 | 29   | Continuous        | Monterey, Santa Barbara, Imperial, San Luis Obispo          |
| Celery                               | 1                  | 95                              | 25.0              | 887.5                         | 227,130           | 18                 | 22   | Continuous        | Ventura, Monterey, Santa Barbara, San Luis Obispo           |
| Corn, Fresh Market Sweet             | 2                  | 15                              | 24.0              | 204.0                         | 97,920            | 39                 | 38   | May 1-Dec. 10     | Fresno, Imperial, Contra Costa, San Joaquin, Riverside      |
| Cucumbers, Fresh Market              | 4                  | 9                               | 4.3               | 51.6                          | 29,515            | 55                 | 60   | Mar. 20-Nov. 30   | San Joaquin, San Diego, Tulare, Santa Clara, Orange         |
| Garlic 4/                            | 1                  | 84                              | 27.0              | 236.2                         | 138,146           | 32                 | 31   | Apr. 1-Sept. 15   | Fresno, Kern                                                |
| Lettuce, Head                        | 1                  | 71                              | 129.0             | 2,418.8                       | 735,300           | ---                | ---  | Continuous        | Monterey, Imperial, Fresno, Santa Barbara                   |
| Lettuce, Leaf                        | 1                  | 85                              | 49.0              | 526.7                         | 296,034           | ---                | ---  | Continuous        | Imperial, Monterey, Fresno, Riverside, San Benito           |
| Lettuce, Romaine                     | 1                  | 78                              | 42.0              | 619.5                         | 246,561           | ---                | ---  | Continuous        | Monterey, Riverside, Ventura, Santa Clara                   |
| Lettuce, All                         | 1                  | 74                              | 220.0             | 3,565.0                       | 1,277,895         | 5                  | 4    | ---               | Monterey, Imperial, Fresno, Santa Barbara, San Benito       |
| Melons, Cantaloupe                   | 1                  | 58                              | 54.9              | 672.6                         | 223,287           | 19                 | 23   | May 15-Nov. 30    | Fresno, Imperial, Merced, Riverside, Stanislaus             |
| Melons, Honeydew                     | 1                  | 75                              | 20.4              | 188.7                         | 63,403            | 42                 | 48   | June 1-Nov. 30    | Fresno, Sutter, Yolo, Imperial, Riverside                   |
| Melons, Watermelon                   | 3                  | 15                              | 11.8              | 300.9                         | 76,429            | 44                 | 42   | May 25-Oct. 15    | Fresno, Riverside, Kern, San Joaquin, Imperial              |
| Mushrooms, Agaricus                  | 2                  | 15                              | 0.5               | 64.2                          | 170,159           | 30                 | 28   | Continuous        | Monterey, Santa Clara, San Mateo, San Diego                 |
| Onions, All                          | 1                  | 32                              | 43.8              | 1,382.4                       | 218,229           | 28                 | 24   | Apr. 1-Oct. 31    | Fresno, Imperial, Kern, San Joaquin, Los Angeles            |
| Peppers, Bell                        | 1                  | 43                              | 21.0              | 346.5                         | 197,987           | ---                | ---  | July 1-Dec. 10    | Kern, Ventura, Riverside, Fresno, San Joaquin               |
| Peppers, Chili                       | 2                  | 22                              | 2.8               | 32.2                          | 17,914            | ---                | ---  | ---               | Santa Clara, Riverside, San Diego                           |
| Peppers, All                         | ---                | ---                             | 23.8              | 378.7                         | 215,901           | 25                 | 25   | ---               | Kern, Ventura, Riverside, Santa Clara                       |
| Pumpkins                             | 2                  | 19                              | 6.0               | 75.0                          | 16,350            | 64                 | 66   | ---               | San Joaquin, Sacramento, San Mateo, Ventura                 |
| Spinach, Fresh Market                | 1                  | 67                              | 20.0              | 160.0                         | 112,640           | 38                 | 36   | Continuous        | Monterey, Riverside, Imperial, San Benito, Santa Barbara    |
| Squash                               | 1                  | 18                              | 8.3               | 78.8                          | 33,049            | 58                 | 57   | ---               | Santa Barbara, Fresno, Riverside, San Luis Obispo           |
| Tomatoes, Fresh Market               | 2                  | 31                              | 38.5              | 577.5                         | 293,370           | ---                | ---  | May 15-Dec. 31    | Merced, San Joaquin, Fresno, San Diego, Stanislaus          |
| Tomatoes, Processing                 | 1                  | 95                              | 291.0             | 11,056.0                      | 632,403           | ---                | ---  | June 20-Nov. 10   | Fresno, Yolo, San Joaquin, Colusa, Merced                   |
| Tomatoes, All                        | 1                  | 86                              | 329.5             | 11,633.5                      | 925,773           | 9                  | 9    | ---               | Fresno, San Joaquin, Merced, Yolo, Colusa                   |
| Other Vegetables<br>and Melons, Etc. | ---                | ---                             | 237.2             | 4,210.8                       | 985,480           | ---                | ---  | ---               | ---                                                         |
| FRUITS AND NUTS                      |                    |                                 |                   |                               |                   |                    |      |                   |                                                             |
| TOTAL VALUE -- \$7,885,185,000       |                    |                                 |                   |                               |                   |                    |      |                   |                                                             |
| Almonds (Shelled) 4/                 | 1                  | 99                              | 530.0             | 545.0                         | 1,189,870         | 10                 | 6    | Aug. 1-Oct. 31    | Kern, Stanislaus, Fresno, Merced, Madera                    |
| Apples                               | 4                  | 5                               | 26.0              | 235.0                         | 93,840            | 41                 | 39   | July 15-Oct. 30   | San Joaquin, Kern, Fresno, Santa Cruz, Stanislaus           |
| Apricots                             | 1                  | 93                              | 17.0              | 85.0                          | 22,964            | 62                 | 61   | May 1-July 15     | Stanislaus, Fresno, San Joaquin, Merced, Kern               |
| Avocados                             | 1                  | 90                              | 58.0              | 200.0                         | 358,000           | 17                 | 16   | Continuous        | San Diego, Ventura, Santa Barbara, Riverside                |
| Berries, Boysenberries               | 2                  | 32                              | 0.2               | 1.0                           | 1,372             | 73                 | 74   | June 1-July 15    | ---                                                         |
| Berries, Raspberries                 | 2                  | 26                              | 2.4               | 14.6                          | 40,851            | 54                 | 54   | June 1-Oct. 31    | Santa Cruz, Monterey, Ventura                               |
| Berries, F.M. Strawberries           | 1                  | 85                              | ---               | 632.1                         | 852,071           | ---                | ---  | ---               | ---                                                         |
| Berries, Proc. Strawberries          | 1                  | 90                              | ---               | 215.8                         | 138,512           | ---                | ---  | ---               | ---                                                         |
| Berries, All Strawberries            | 1                  | 86                              | 28.5              | 847.9                         | 990,583           | 8                  | 7    | Feb. 20-Nov. 15   | Ventura, Monterey, Santa Barbara, Santa Cruz, Orange        |
| Cherries, Sweet                      | 2                  | 31                              | 26.0              | 55.5                          | 93,315            | 40                 | 40   | May 20-June 25    | San Joaquin, Fresno, Kern, Tulare, Stanislaus               |
| Dates 4/                             | 1                  | 99                              | 4.5               | 24.2                          | 37,510            | 61                 | 56   | Oct. 1-Dec. 15    | Riverside, Imperial                                         |
| Figs 4/                              | 1                  | 99                              | 12.9              | 54.4                          | 18,012            | 66                 | 65   | June 10-Sept. 15  | Madera, Merced                                              |
| Grapefruit, All                      | 3                  | 10                              | 14.0              | 197.7                         | 47,485            | 50                 | 53   | Continuous        | Riverside, Tulare, Kern, Imperial, San Diego                |
| Grapes, Raisin Type                  | ---                | ---                             | 246.0             | 2,833.0                       | 438,458           | ---                | ---  | May 15-Nov. 15    | ---                                                         |
| Grapes, Table Type                   | ---                | ---                             | 88.0              | 739.0                         | 456,944           | ---                | ---  | May 25-Dec. 15    | ---                                                         |
| Grapes, Wine Type                    | ---                | ---                             | 486.0             | 3,149.0                       | 1,683,452         | ---                | ---  | Aug. 5-Dec. 15    | ---                                                         |
| Grapes, All                          | 1                  | 91                              | 820.0             | 6,721.0                       | 2,578,854         | 2                  | 2    | ---               | Kern, Fresno, Tulare, Napa, Sonoma                          |

**Commodity Rank, Acreage, Production, Value and Leading Producing Counties, 2002**

| Commodity                                       | U.S.<br>Rank<br>1/ | CA<br>Share of<br>U.S.<br>Prod. | Area<br>Harvested | Short Tons<br>(2,000<br>Lbs.) | Total<br>Value 2/ | California<br>Rank |      | Harvest<br>Season | Leading Counties 3/                                           |
|-------------------------------------------------|--------------------|---------------------------------|-------------------|-------------------------------|-------------------|--------------------|------|-------------------|---------------------------------------------------------------|
|                                                 | Number             | Percent                         | 1,000<br>Acres    | 1,000 Tons                    | \$1,000           | 2001               | 2002 |                   |                                                               |
|                                                 |                    |                                 |                   |                               |                   | Number             |      |                   |                                                               |
| Kiwifruit 4/                                    | 1                  | 99                              | 4.5               | 26.1                          | 18,097            | 65                 | 64   | Oct. 1-May 31     | Tulare, Butte, Yuba, Fresno, Kern                             |
| Lemons                                          | 1                  | 87                              | 49.5              | 695.4                         | 287,026           | 22                 | 20   | Continuous        | Ventura, Kern, Riverside, Tulare, Imperial                    |
| Nectarines 4/                                   | 1                  | 99                              | 36.5              | 299.0                         | 114,517           | 33                 | 34   | June 10-Sept. 5   | Fresno, Tulare, Kings, Kern, Stanislaus                       |
| Olives 4/                                       | 1                  | 99                              | 36.0              | 103.0                         | 60,725            | 37                 | 49   | Sept. 25-Mar. 15  | Tulare, Glenn, Tehama, Madera, Butte                          |
| Oranges, Navel and Misc.                        | ---                | 21                              | 128.0             | 1,200.0                       | 412,305           | ---                | ---  | Nov. 25-May 15    | ---                                                           |
| Oranges, Valencia                               | ---                | 18                              | 65.0              | 731.3                         | 146,538           | ---                | ---  | May 15-Oct. 15    | ---                                                           |
| Oranges, All                                    | 2                  | 19                              | 193.0             | 1,931.3                       | 558,843           | 13                 | 12   | ---               | Tulare, Kern, Fresno, Ventura, Riverside                      |
| Peaches, Clingstone                             | 1                  | 100                             | 31.0              | 562.0                         | 132,639           | ---                | ---  | July 15-Sept. 15  | ---                                                           |
| Peaches, Freestone                              | 1                  | 55                              | 39.0              | 398.0                         | 138,369           | ---                | ---  | May 10-Sept. 15   | ---                                                           |
| Peaches, All                                    | 1                  | 75                              | 70.0              | 960.0                         | 271,008           | 20                 | 21   | ---               | Fresno, Tulare, Sutter, Stanislaus, Kings                     |
| Pears, All                                      | 2                  | 30                              | 17.3              | 262.0                         | 68,270            | 43                 | 44   | Aug. 5-Oct. 5     | Sacramento, Lake, Fresno, Mendocino, Tulare                   |
| Pecans                                          | 8                  | 1                               | 2.6               | 1.9                           | 4,826             | 70                 | 71   | Sept. 1-Nov. 30   | Tulare                                                        |
| Pistachios 4/                                   | 1                  | 99                              | 83.0              | 151.5                         | 336,330           | 31                 | 17   | Sept. 15-Dec. 10  | Kern, Madera, Tulare, Kings, Fresno                           |
| Plums                                           | 1                  | 91                              | 36.0              | 201.0                         | 77,586            | 46                 | 41   | May 25-Aug. 20    | Fresno, Tulare, Kings, Kern, Madera                           |
| Plums, Dried 4/ (Prunes)                        | 1                  | 99                              | 74.0              | 171.0                         | 131,220           | 36                 | 32   | Aug. 15-Oct. 10   | Tehama, Yuba, Sutter, Butte, Glenn                            |
| Tangerines, Mandarins,<br>Tangelos, and Tangors | 2                  | 23                              | 9.0               | 82.5                          | 38,821            | 56                 | 55   | Nov. 1-Apr. 30    | Tulare, Riverside, San Diego, Placer, Imperial                |
| Walnuts 4/                                      | 1                  | 99                              | 200.0             | 282.0                         | 304,560           | 16                 | 19   | Sept. 5-Nov. 10   | San Joaquin, Stanislaus, Butte, Tulare, Sutter                |
| Other Fruits and Nuts                           | ---                | ---                             | 43.0              | 259.0                         | 140,700           | ---                | ---  | ---               | ---                                                           |
| FIELD AND SEED CROPS                            |                    |                                 |                   |                               |                   |                    |      |                   |                                                               |
| TOTAL VALUE -- \$3,124,499,000                  |                    |                                 |                   |                               |                   |                    |      |                   |                                                               |
| Barley                                          | 7                  | 2                               | 75.0              | 122.4                         | 12,495            | 68                 | 68   | May 15-Oct. 1     | Modoc, Siskiyou, Fresno, Kern, San Luis Obispo                |
| Beans, Dry                                      | 6                  | 6                               | 89.0              | 88.1                          | 56,384            | 53                 | 51   | Aug. 20-Nov. 15   | Stanislaus, Fresno, San Joaquin, Colusa, Sutter               |
| Cotton Lint, All                                | 2                  | 12                              | 686.0             | 495.2                         | 633,466           | 11                 | 11   | Oct. 1-Jan. 1     | Fresno, Kings, Kern, Merced, Tulare                           |
| Cottonseed                                      | 2                  | 12                              | ---               | 731.0                         | 101,609           | 34                 | 37   | ---               | Fresno, Kings, Kern, Tulare, Merced                           |
| Grain, Corn                                     | 24                 | 1                               | 150.0             | 714.0                         | 71,400            | 45                 | 43   | Sept. 1-Dec. 1    | San Joaquin, Glenn, Sacramento, Solano, Yolo                  |
| Grain, Sorghum                                  | 15                 | 1                               | 11.0              | 29.3                          | 3,219             | 72                 | 72   | ---               | Solano, Tulare, Sutter, Sacramento                            |
| Hay, Alfalfa and Other                          | 2                  | 6                               | 1,640.0           | 9,594.0                       | 913,509           | 6                  | 10   | Mar. 1-Nov. 5     | Imperial, Kern, Tulare, Merced, Fresno                        |
| Oats                                            | 17                 | 1                               | 27.0              | 34.6                          | 5,832             | 71                 | 70   | June 15-Oct. 1    | Merced, Siskiyou, Sonoma, Modoc, Solano                       |
| Potatoes (Excl. Sweet)                          | 8                  | 4                               | 44.9              | 884.8                         | 307,024           | 26                 | 18   | Continuous        | Kern, Imperial, San Joaquin, Modoc, Siskiyou                  |
| Potatoes, Sweet                                 | 2                  | 20                              | 10.4              | 122.2                         | 56,456            | 48                 | 50   | July 15-Nov. 15   | Merced, Stanislaus                                            |
| Rice 5/ 6/                                      | 2                  | 20                              | 528.0             | 2,149.4                       | 214,945           | 24                 | 26   | Sept. 1-Nov. 30   | Colusa, Sutter, Butte, Glenn, Yuba                            |
| Sugar Beets 5/ 6/                               | 5                  | 7                               | 49.9              | 1,971.0                       | 65,831            | 51                 | 47   | Apr. 1-Dec. 10    | Imperial, Fresno, Merced, Kern, Kings                         |
| Wheat, All                                      | 18                 | 2                               | 390.0             | 945.0                         | 114,300           | 35                 | 35   | May 20-Sept. 1    | Kings, Kern, Fresno, Imperial, Tulare                         |
| Oil Crops 7/                                    | ---                | ---                             | 109.0             | 23.7                          | 26,370            | 57                 | 63   | ---               | ---                                                           |
| Other Field Crops                               | ---                | ---                             | 4,712.9           | 9,241.4                       | 551,659           | ---                | ---  | ---               | ---                                                           |
| NURSERY, GREENHOUSE AND FLORICULTURE CROPS      |                    |                                 |                   |                               |                   |                    |      |                   |                                                               |
| TOTAL VALUE -- \$3,306,826,000                  |                    |                                 |                   |                               |                   |                    |      |                   |                                                               |
| Nursery Products 4/ 6/ 8/                       | 1                  | 20                              | ---               | ---                           | 2,347,697         | 3                  | 3    | Continuous        | San Diego, Orange, Riverside, Monterey, Ventura, Los Angeles  |
| Flowers and Foliage 9/                          | 1                  | ---                             | ---               | ---                           | 948,629           | 7                  | 8    | Continuous        | San Diego, Santa Barbara, San Luis Obispo, Ventura, San Mateo |
| Christmas Trees                                 | ---                | ---                             | ---               | ---                           | 10,500            | 69                 | 69   | Nov. 1-Dec. 24    | El Dorado, San Diego, Siskiyou, Santa Clara                   |

1/ Based on quantity produced for crops and on quantity marketed for livestock and poultry products.

2/ Based on value of quantity harvested for crops, value of quantity marketed for livestock, and value of quantity produced for poultry products.

3/ Based on values published in the county agricultural commissioners' annual crop reports.

4/ Share of U.S. production based on 1997 Census of Agriculture.

5/ The 2002 price and value are based on the 2001 California average price.

6/ Extracted from county agricultural commissioners' annual crop reports.

7/ Includes sunflower, safflower, and canola.

8/ Includes trees, shrubs, vines, bulbs, turf, etc., not included in flowers and foliage category.

9/ Includes cut flowers, potted plants, foliage plants, bedding plants, and indoor decoratives.

### Commodity Rank, Value and Leading Producing Counties, 2002

| Commodity                             | U.S.<br>Rank 1/ | CA<br>Share of<br>U.S.<br>Prod. | Marketings   | Cash<br>Receipts 2/ | California<br>Rank |      | Leading Counties 3/                                  |
|---------------------------------------|-----------------|---------------------------------|--------------|---------------------|--------------------|------|------------------------------------------------------|
|                                       | Number          | Percent                         | 1,000 Pounds | \$1,000             | 2001               | 2002 |                                                      |
|                                       |                 |                                 |              |                     | Number             |      |                                                      |
| LIVESTOCK, DAIRY, POULTRY, AND APIARY |                 |                                 |              |                     |                    |      |                                                      |
| TOTAL VALUE -- \$6,241,632,000        |                 |                                 |              |                     |                    |      |                                                      |
| Aquaculture                           | ---             | ---                             | ---          | 12,966              | 67                 | 67   | Riverside, Imperial, Sacramento                      |
| Cattle and Calves                     | 7               | 4                               | 2,330,200    | 1,228,722           | 4                  | 5    | Tulare, Imperial, Fresno, Merced, San Bernardino     |
| Chickens, All                         | ---             | ---                             | ---          | 452,353             | 12                 | 15   | Fresno, Merced, Stanislaus, San Bernardino           |
| Hogs and Pigs 4/                      | 29              | ---                             | 63,950       | 22,188              | 60                 | 62   | Tulare, Fresno, Stanislaus, Merced                   |
| Honey                                 | 2               | 14                              | 23,320       | 30,083              | 63                 | 59   | Tulare, Kern, Merced, Imperial, Fresno               |
| Milk and Cream                        | 1               | 21                              | 34,884,000   | 3,812,371           | 1                  | 1    | Tulare, Merced, Stanislaus, San Bernardino, Kings    |
| Sheep and Lambs                       | 2               | 12                              | 77,835       | 50,388              | 52                 | 52   | Kern, Solano, Riverside, Fresno, Imperial            |
| Turkeys                               | 6               | 6                               | 438,960      | 158,026             | 23                 | 30   | Fresno, Merced, Stanislaus, Kings, Tulare            |
| Wool                                  | 3               | 9                               | 3,650        | 1,643               | 74                 | 73   | ---                                                  |
| Millions of<br>Eggs                   |                 |                                 |              |                     |                    |      |                                                      |
| Eggs, Chicken                         | 4               | 7                               | 6,124        | 200,051             | 21                 | 27   | Riverside, Merced, San Diego, San Bernardino, Fresno |
| Other Livestock and<br>Poultry        | ---             | ---                             | ---          | 272,841             | ---                | ---  | ---                                                  |

1/ Based on quantity produced for crops and on quantity marketed for livestock and poultry products.

2/ Based on value of quantity harvested for crops, value of quantity marketed for livestock, and value of quantity produced for poultry products.

3/ Based on values published in the county agricultural commissioners' annual crop reports.

4/ California share of U.S. production is less than one-half percent.

### California's Farm Numbers and Size, 1950-2002

| Year 1/ | Number of Farms | Land in Farms | Average Size of Farm |
|---------|-----------------|---------------|----------------------|
|         |                 | 1,000 Acres   | Acres                |
| 1950    | 144,000         | 37,500        | 260                  |
| 1955    | 124,000         | 39,000        | 316                  |
| 1960    | 108,000         | 38,800        | 359                  |
| 1965    | 82,000          | 37,800        | 461                  |
| 1970    | 64,000          | 36,600        | 572                  |
| 1975    | 73,000          | 34,300        | 470                  |
| 1980    | 81,000          | 33,800        | 417                  |
| 1985    | 79,000          | 32,900        | 416                  |
| 1990    | 85,000          | 30,800        | 362                  |
| 1991    | 83,000          | 30,500        | 367                  |
| 1992    | 82,000          | 30,200        | 368                  |
| 1993    | 85,000          | 29,900        | 352                  |
| 1994    | 85,000          | 29,600        | 348                  |
| 1995    | 86,000          | 29,300        | 341                  |
| 1996    | 86,000          | 29,000        | 337                  |
| 1997    | 87,000          | 28,700        | 330                  |
| 1998    | 89,000          | 28,500        | 320                  |
| 1999    | 89,000          | 27,800        | 312                  |
| 2000    | 87,500          | 27,800        | 318                  |
| 2001    | 85,000          | 27,700        | 326                  |
| 2002    | 84,000          | 27,700        | 330                  |

1/ Until 1950 the definition of a farm was: Places of 10 or more acres that had annual sales of agricultural products of \$50 or more and places of less than 10 acres that had annual sales of \$250 or more. Starting in 1975 the new definition of a farm is: Places with annual sales of agricultural products of \$1,000 or more.

**County Rank, Total Value of Production and Leading Commodities, 2002 1/**

| Rank |      | County          | Total Value | Leading Commodities                                                                                        |
|------|------|-----------------|-------------|------------------------------------------------------------------------------------------------------------|
| 2001 | 2002 |                 | \$1,000     |                                                                                                            |
| 2    | 1    | Fresno          | 3,415,591   | Grapes, Cotton, Poultry, Tomatoes, Milk                                                                    |
| 1    | 2    | Tulare          | 3,200,552   | Milk, Navel and Valencia Oranges, Grapes, Cattle and Calves, Clingstone and Freestone Peaches              |
| 3    | 3    | Monterey        | 2,812,069   | Leaf and Head Lettuce, Broccoli, Strawberries, Nursery Products, Grapes                                    |
| 4    | 4    | Kern            | 2,586,247   | Grapes, All Citrus, All Carrots, Almonds and By-Products, All Milk                                         |
| 5    | 5    | Merced          | 1,730,720   | Milk, Chickens, Almonds, Cattle and Calves, All Tomatoes                                                   |
| 7    | 6    | Stanislaus      | 1,367,971   | All Milk, Almonds, All Chickens, All Cattle and Calves, Deciduous Fruit and Nuts                           |
| 6    | 7    | San Joaquin     | 1,343,808   | All Milk, All Grapes, All Tomatoes, Almond Meats, English Walnuts                                          |
| 8    | 8    | San Diego       | 1,297,258   | Cut Flowers and Foliage Plants, Nursery Woody Ornamentals and Bedding Plants, Avocados, Eggs, Tomatoes     |
| 11   | 9    | Imperial        | 1,224,109   | Cattle, Leaf and Head Lettuce, Alfalfa, Carrots, Livestock                                                 |
| 10   | 10   | Ventura         | 1,161,070   | Strawberries, Lemons, Nursery Stock, Celery, Avocados                                                      |
| 9    | 11   | Riverside       | 1,063,478   | Milk, Nursery Products, Table Grapes, Eggs, All Hay                                                        |
| 12   | 12   | Kings           | 1,023,807   | Milk, Cotton, Cattle and Calves, Alfalfa Hay, Turkeys                                                      |
| 15   | 13   | Madera          | 778,385     | Grapes, Almonds, Milk, Pistachios, Replacement Heifers                                                     |
| 13   | 14   | Santa Barbara   | 775,051     | Strawberries, Broccoli, Wine Grapes, Head Lettuce, Cauliflower                                             |
| 14   | 15   | San Bernardino  | 631,550     | Milk, Cattle and Calves, Replacement Heifers, Eggs, Nursery Trees and Shrubs                               |
| 16   | 16   | Sonoma          | 564,767     | Wine Grapes, Market Milk, Livestock and Poultry, Nursery Ornamentals, Cattle and Calves                    |
| 17   | 17   | San Luis Obispo | 478,872     | Wine Grapes, Broccoli, Cattle and Calves, Head Lettuce, Indoor Decorative Flowers                          |
| 18   | 18   | Napa            | 387,863     | Wine Grapes, Nursery Products, Cattle and Calves, Livestock Products, Range Pasture                        |
| 20   | 19   | Orange          | 344,289     | Nursery Stock and Cut Flowers, Strawberries, Tomatoes, Bell and Misc. Peppers, Avocados                    |
| 24   | 20   | Glenn           | 303,892     | Paddy Rice, Almonds, Dairy Products, Cattle and Calves, Alfalfa Hay                                        |
| 22   | 21   | Yolo            | 299,780     | Processing Tomatoes, Wine Grapes, Alfalfa Hay, Milling Rice, Vegetable Crops                               |
| 26   | 22   | Sutter          | 291,061     | Rice, Peaches, Walnuts, Dried Plums, Tomatoes                                                              |
| 25   | 23   | Colusa          | 290,266     | Rice, Processing Tomatoes, Almond Meats, Rice Seed, Cotton Lint                                            |
| 28   | 24   | Butte           | 287,497     | Rice, Almonds, English Walnuts, Dried Plums, Nursery Stock                                                 |
| 19   | 25   | Santa Cruz      | 284,808     | Strawberries and Raspberries, Nursery Plants, Head and Leaf Lettuce, Vegetable Crops, Cut Flowers          |
| 27   | 26   | Los Angeles     | 275,969     | Nursery Plants, Root Vegetables, Dry Onions, Peaches, Indoor Foliage and Flowering Plants                  |
| 21   | 27   | Sacramento      | 275,937     | Wine Grapes, Market Milk, Bartlett Pears, Nursery Stock, Cattle and Calves                                 |
| 23   | 28   | Santa Clara     | 255,374     | Nursery Crops, Mushrooms, Bell Peppers, Cut Flowers, Wine Grapes                                           |
| 29   | 29   | San Benito      | 214,841     | Nursery Stock, Baby, Leaf and Head Lettuce, Vegetable Crops, Wine Grapes, Bell Peppers                     |
| 30   | 30   | Solano          | 199,486     | Nursery Stock, Processing Tomatoes, Cattle and Calves, Alfalfa, Wine Grapes                                |
| 31   | 31   | San Mateo       | 181,972     | Ornamental and Potted Nursery Stock, Mushrooms, Cut and Potted Flowers, Brussels Sprouts                   |
| 33   | 32   | Yuba            | 133,484     | Rice, Peaches, Dried Plums, Cattle and Calves, Walnuts                                                     |
| 32   | 33   | Mendocino       | 126,953     | Wine Grapes, Bartlett Pears, Cattle and Calves, Milk, Nursery                                              |
| 34   | 34   | Tehama          | 126,372     | English Walnuts, Dried Plums, Market Milk, Olives, Almonds                                                 |
| 36   | 35   | Siskiyou        | 119,021     | Alfalfa Hay, Strawberry Nursery Plants, Irish Potatoes, Fed Heifers and Steers, Irrigated Pasture          |
| 35   | 36   | Humboldt        | 104,695     | Nursery Products, All Milk, Cattle and Calves, Range Pasture, Biomass                                      |
| 37   | 37   | Contra Costa    | 100,154     | Nursery Bedding Plants, Cattle and Calves, Sweet Corn, Livestock Products, Grapes                          |
| 41   | 38   | Modoc           | 69,988      | Alfalfa Hay, Irish Potatoes, Cattle and Calves, Vegetable Crops, Onions                                    |
| 38   | 39   | Placer          | 66,556      | Milling Rice, Nursery Products, Cattle and Calves, Chickens, Fruit and Nut Crops                           |
| 39   | 40   | Lake            | 63,907      | Wine Grapes, Bartlett Pears, Nursery Products, Cattle and Calves, English Walnuts                          |
| 40   | 41   | Shasta          | 52,198      | Cattle, Strawberry Nursery Plants, Alfalfa and Other Hay, Irrigated and Range Pasture, Wild Rice           |
| 42   | 42   | Marin           | 44,477      | Market Milk, Cattle and Calves, Range Pasture, Poultry, Fish                                               |
| 43   | 43   | Lassen          | 43,349      | All Hay, Livestock, Strawberry and Field Crop Nursery Plants, Pasture, Mint                                |
| 45   | 44   | Del Norte       | 31,092      | All Milk, Nursery Bulbs, Woody Ornamentals and Misc. Products, Cattle and Calves, Irrigated Pasture        |
| 44   | 45   | Alameda         | 30,013      | Woody Ornamentals and Nursery Products, Wine Grapes, Cattle and Calves, Range Pasture, Vegetable Crops     |
| 46   | 46   | El Dorado       | 26,544      | Apples, Wine Grapes, Cattle and Calves, Christmas Trees and Cut Greens, Range Pasture                      |
| 48   | 47   | Amador          | 23,737      | Wine Grapes, Cattle and Calves, Range and Irrigated Pasture, Livestock, English Walnuts                    |
| 47   | 48   | Mono            | 21,835      | Carrots, Alfalfa and Other Hay, Cattle, Irrigated Pasture, Sheep and Lambs                                 |
| 50   | 49   | Tuolumne        | 20,270      | Livestock, Cattle and Calves, Irrigated and Range Pasture, Firewood, Bees                                  |
| 49   | 50   | Mariposa        | 19,600      | Cattle and Calves, Range Pasture, Livestock Products, Poultry, Fruit and Nut Crops                         |
| 51   | 51   | Calaveras       | 17,716      | Cattle and Calves, Poultry, Wine Grapes, Livestock and Poultry Products, Walnuts                           |
| 52   | 52   | Plumas          | 14,617      | Cattle, All Pasture, All Hay, Livestock, Fruit and Nut Crops                                               |
| 53   | 53   | Inyo            | 14,240      | Nursery Turf, Cattle, Alfalfa and Other Hay, Carrots, Irrigated and Range Pasture                          |
| 54   | 54   | Nevada          | 8,190       | Cattle and Calves, Pasture and Range, Wine Grapes, Fruit and Vegetable Crops, Nursery Stock                |
| 55   | 55   | Sierra          | 4,400       | Cattle, Irrigated, Forage, and Range Pasture, Wild, Alfalfa and Grain Hay, Fruit and Nuts Crops, Livestock |
| 57   | 56   | Trinity 2/      | 2,139       | Cattle and Calves, Irrigated and Range Pasture, Wine Grapes, Fruit and Nut Crops, Nursery Products         |
| 56   | 57   | San Francisco   | 1,645       | Vegetable Crops, Cut Flowers                                                                               |
| 58   | 58   | Alpine 2/       | 0           | —                                                                                                          |

1/ Totals vary slightly from those published by counties due to classification differences between county and state reports.

2/ Reports for Alpine and Trinity counties were not available at publication so 2001 data were used for this report.

### Seasonal Rainfall with Comparisons to Normal, 2002-2003

| Stations              | 2001-2002                          |                      | 2002-2003                          |                      | Normal<br>Annual Rainfall |
|-----------------------|------------------------------------|----------------------|------------------------------------|----------------------|---------------------------|
|                       | Precipitation<br>July 1 to June 24 | Percent<br>of Normal | Precipitation<br>July 1 to June 29 | Percent<br>of Normal |                           |
|                       | <i>Inches</i>                      |                      | <i>Inches</i>                      |                      |                           |
| NORTH COAST           |                                    |                      |                                    |                      |                           |
| Eureka                | 39.77                              | 106                  | 52.40                              | 140                  | 37.53                     |
| Ukiah                 | 29.21                              | 77                   | 41.94                              | 110                  | 38.01                     |
| Santa Rosa            | 32.20                              | 108                  | 34.76                              | 116                  | 29.92                     |
| CENTRAL COAST         |                                    |                      |                                    |                      |                           |
| San Francisco Airport | 19.37                              | 98                   | 23.82                              | 120                  | 19.79                     |
| San Jose              | 10.94                              | 77                   | 15.36                              | 108                  | 14.20                     |
| Livermore Tele        | 11.92                              | 85                   | 16.69                              | 118                  | 14.09                     |
| Salinas Airport       | 3.62                               | 30                   | 7.02                               | 57                   | 12.22                     |
| Monterey FAA          | 11.36                              | 78                   | 14.38                              | 99                   | 14.57                     |
| King City             | 6.44                               | 58                   | 11.16                              | 100                  | 11.12                     |
| Paso Robles Airport   | 5.59                               | 44                   | 10.48                              | 82                   | 12.71                     |
| SACRAMENTO VALLEY     |                                    |                      |                                    |                      |                           |
| Redding               | 28.62                              | 101                  | 34.99                              | 123                  | 28.36                     |
| Red Bluff FSS         | 18.68                              | 83                   | 27.06                              | 120                  | 22.51                     |
| Chico AFS             | 27.64                              | 108                  | 33.10                              | 129                  | 25.57                     |
| Marysville            | 21.91                              | 104                  | 20.52                              | 97                   | 21.05                     |
| Sacramento Airport    | 17.95                              | 102                  | 16.78                              | 95                   | 17.59                     |
| SAN JOAQUIN VALLEY    |                                    |                      |                                    |                      |                           |
| Stockton WSO          | 12.12                              | 87                   | 12.13                              | 87                   | 13.97                     |
| Fresno                | 7.02                               | 66                   | 9.82                               | 92                   | 10.64                     |
| Bakersfield           | 3.59                               | 63                   | 5.94                               | 104                  | 5.73                      |
| SOUTH COAST           |                                    |                      |                                    |                      |                           |
| Santa Maria Airport   | 6.46                               | 52                   | 12.59                              | 101                  | 12.47                     |
| Santa Barbara         | 9.18                               | 56                   | 22.32                              | 137                  | 16.29                     |
| Oxnard                | 6.21                               | 44                   | 17.85                              | 126                  | 14.20                     |
| Los Angeles           | 4.37                               | 30                   | 17.01                              | 115                  | 14.73                     |
| Riverside             | 3.30                               | 33                   | 11.40                              | 114                  | 9.98                      |
| San Diego Airport     | 3.01                               | 30                   | 10.65                              | 107                  | 9.91                      |
| SOUTHEASTERN INTERIOR |                                    |                      |                                    |                      |                           |
| Bishop                | 2.04                               | 38                   | 3.89                               | 73                   | 5.36                      |
| Lancaster             | 2.05                               | 28                   | 7.06                               | 97                   | 7.26                      |
| Daggett Airport       | 1.64                               | 42                   | 4.17                               | 106                  | 3.94                      |
| Thermal Airport       | 0.42                               | 13                   | 1.80                               | 56                   | 3.21                      |
| Blythe                | 0.66                               | 18                   | 2.40                               | 66                   | 3.63                      |
| Imperial              | 0.02                               | 1                    | 2.19                               | 80                   | 2.75                      |
| CASCADE-SIERRA        |                                    |                      |                                    |                      |                           |
| Alturas               | 10.58                              | 87                   | 10.00                              | 82                   | 12.13                     |
| Mt. Shasta            | 37.44                              | 103                  | 54.70                              | 151                  | 36.22                     |
| Blue Canyon           | 61.71                              | 91                   | 54.10                              | 80                   | 67.85                     |
| Yosemite Valley       | 25.59                              | 68                   | 23.56                              | 63                   | 37.39                     |

**Source:** Western Regional Climate Center, Reno, Nevada

# California Field Crops

California's 2002 field crop production was worth \$3.12 billion at the farm-gate level. The average value per harvested acre increased from \$642 in 2001 to \$663 in 2002. Production of the major field crops in California was 29.0 million tons, up 12 percent from the 26.0 million tons in 2001.

## Notable Increases in Value:

|                     |      |
|---------------------|------|
| Beans, Dry .....    | 21%  |
| Oats .....          | 188% |
| Potatoes, All ..... | 66%  |
| Sugar Beets .....   | 23%  |

## Significant Decreases in Value:

|                       |     |
|-----------------------|-----|
| Barley .....          | 9%  |
| Cotton, Seed .....    | 16% |
| Hay, All .....        | 10% |
| Potatoes, Sweet ..... | 9%  |

Hay was the state's highest-valued field crop at \$913 million, followed by cotton with a value of \$623 million. Of the total hay value, alfalfa accounted for \$797 million and other hay was \$116 million. Nationally, the Golden State is the leading alfalfa-producing state and ranked second for all cotton and all hay production. The value of all hay decreased 10 percent. This was due to a 17 percent fall in unit price per ton—from \$115.00 in 2001 to \$95.50 in 2002. However, production of all hay increased by 8 percent in 2002. Hay was in strong demand to provide for the growing dairy industry.

All cotton production and harvested acreage dropped 14 and 21 percent, respectively, from last year. American Pima production fell 6 percent and Upland production declined 18 percent. The unit price of American Pima dropped fractionally, while Upland cotton increased by 29 percent. Planting began in mid-March, but cool, wet weather during the month and into early April caused a large amount of the acreage to be replanted. Due to poor Upland prices, a number of growers switched to American Pima. Warm weather during the growing season was beneficial and harvest began by mid-September in the Imperial Valley and late September in the San Joaquin Valley. Harvest progressed well and was nearly complete by mid-December.

Rice harvested acreage and production both increased 12 percent, while the value jumped by 6 percent. Ideal conditions throughout the growing season provided for excellent yields. The weather during harvest also helped to boost yields as very little rainfall occurred during the harvest season.

The large increase in dry bean value was attributed to a 5 percent increase in harvested acreage and an 18 percent increase in production. Harvest of the crop went well with good quality reported.

Corn for grain harvested acreage and production both dropped 6 percent from the previous year. Planting of the crop began in March and continued into April and May. Growth was normal during the growing season and harvest began the last week of July and continued through the fall.

Sugar beet acreage was up 12 percent, while the production and value both jumped 23 percent from 2001.

# Field Crop Acreage, Production and Value, 1993-2002

| Crop                              | Crop Year | Planted      | Harvested    | Yield Per Acre | Production  | Value Per Unit          | Total Value    |
|-----------------------------------|-----------|--------------|--------------|----------------|-------------|-------------------------|----------------|
| Barley                            |           | <i>Acres</i> | <i>Acres</i> | <i>Tons</i>    | <i>Tons</i> | <i>Dollars Per Ton</i>  | <i>\$1,000</i> |
|                                   | 1993      | 250,000      | 200,000      | 1.56           | 312,000     | 105.00                  | 32,760         |
|                                   | 1994      | 290,000      | 220,000      | 1.56           | 343,200     | 111.25                  | 38,181         |
|                                   | 1995      | 260,000      | 200,000      | 1.68           | 336,000     | 136.67                  | 45,920         |
|                                   | 1996      | 250,000      | 190,000      | 1.44           | 273,600     | 153.75                  | 42,066         |
|                                   | 1997      | 230,000      | 150,000      | 1.37           | 205,200     | 114.59                  | 23,513         |
|                                   | 1998      | 170,000      | 125,000      | 1.44           | 180,000     | 97.08                   | 17,475         |
|                                   | 1999      | 140,000      | 100,000      | 1.54           | 153,600     | 97.50                   | 14,976         |
|                                   | 2000      | 130,000      | 95,000       | 1.63           | 155,000     | 98.75                   | 15,310         |
|                                   | 2001      | 160,000      | 110,000      | 1.27           | 139,900     | 98.33                   | 13,759         |
|                                   | 2002      | 130,000      | 75,000       | 1.63           | 122,400     | 102.08                  | 12,495         |
| Beans, Black-Eyed Dry 1/ 2/       |           | <i>Acres</i> | <i>Acres</i> | <i>Pounds</i>  | <i>Cwt.</i> | <i>Dollars Per Cwt.</i> | <i>\$1,000</i> |
|                                   | 1993      | 24,000       | 23,000       | 2,380          | 548,000     | ---                     | ---            |
|                                   | 1994      | 32,000       | 30,000       | 2,570          | 771,000     | ---                     | ---            |
|                                   | 1995      | 44,500       | 43,500       | 2,230          | 970,000     | ---                     | ---            |
|                                   | 1996      | 24,000       | 23,000       | 2,220          | 511,000     | ---                     | ---            |
|                                   | 1997      | 30,000       | 29,000       | 2,400          | 695,000     | ---                     | ---            |
|                                   | 1998      | 33,000       | 31,000       | 1,840          | 570,000     | ---                     | ---            |
|                                   | 1999      | 39,500       | 38,500       | 2,010          | 775,000     | ---                     | ---            |
|                                   | 2000      | 15,300       | 15,300       | 2,160          | 330,000     | ---                     | ---            |
|                                   | 2001      | 12,000       | 12,000       | 2,420          | 290,000     | ---                     | ---            |
|                                   | 2002      | 12,600       | 12,400       | 2,520          | 313,000     | ---                     | ---            |
| Beans, Garbanzo Dry 1/ 2/         |           | <i>Acres</i> | <i>Acres</i> | <i>Pounds</i>  | <i>Cwt.</i> | <i>Dollars Per Cwt.</i> | <i>\$1,000</i> |
|                                   | 1993      | 17,500       | 16,500       | 1,350          | 222,000     | ---                     | ---            |
|                                   | 1994      | 14,000       | 14,000       | 1,870          | 262,000     | ---                     | ---            |
|                                   | 1995      | 19,000       | 17,000       | 1,690          | 288,000     | ---                     | ---            |
|                                   | 1996      | 25,000       | 23,000       | 1,530          | 352,000     | ---                     | ---            |
|                                   | 1997      | 9,000        | 9,000        | 1,670          | 150,000     | ---                     | ---            |
|                                   | 1998      | 5,000        | 5,000        | 1,600          | 80,000      | ---                     | ---            |
|                                   | 1999      | 16,500       | 16,500       | 1,730          | 285,000     | ---                     | ---            |
|                                   | 2000      | 24,500       | 23,500       | 1,460          | 343,000     | ---                     | ---            |
|                                   | 2001      | 29,000       | 27,000       | 1,270          | 342,000     | ---                     | ---            |
|                                   | 2002      | 18,500       | 18,000       | 1,600          | 288,000     | ---                     | ---            |
| Beans, Dark Red Kidney Dry 1/ 2/  |           | <i>Acres</i> | <i>Acres</i> | <i>Pounds</i>  | <i>Cwt.</i> | <i>Dollars Per Cwt.</i> | <i>\$1,000</i> |
|                                   | 1993      | 7,000        | 7,000        | 1,730          | 121,000     | ---                     | ---            |
|                                   | 1994      | 7,000        | 7,000        | 1,790          | 125,000     | ---                     | ---            |
|                                   | 1995      | 4,500        | 4,500        | 1,600          | 72,000      | ---                     | ---            |
|                                   | 1996      | 5,000        | 5,000        | 1,640          | 82,000      | ---                     | ---            |
|                                   | 1997      | 5,000        | 5,000        | 1,800          | 90,000      | ---                     | ---            |
|                                   | 1998      | 5,500        | 5,500        | 850            | 47,000      | ---                     | ---            |
|                                   | 1999      | 3,500        | 3,500        | 1,310          | 46,000      | ---                     | ---            |
|                                   | 2000      | 6,000        | 6,000        | 1,370          | 82,000      | ---                     | ---            |
|                                   | 2001      | 2,500        | 2,500        | 1,600          | 40,000      | ---                     | ---            |
|                                   | 2002      | 2,500        | 2,500        | 1,640          | 41,000      | ---                     | ---            |
| Beans, Light Red Kidney Dry 1/ 2/ |           | <i>Acres</i> | <i>Acres</i> | <i>Pounds</i>  | <i>Cwt.</i> | <i>Dollars Per Cwt.</i> | <i>\$1,000</i> |
|                                   | 1993      | 20,000       | 19,000       | 2,120          | 402,000     | ---                     | ---            |
|                                   | 1994      | 14,000       | 13,500       | 1,950          | 263,000     | ---                     | ---            |
|                                   | 1995      | 13,000       | 12,000       | 1,740          | 209,000     | ---                     | ---            |
|                                   | 1996      | 10,000       | 10,000       | 1,870          | 187,000     | ---                     | ---            |
|                                   | 1997      | 10,000       | 10,000       | 1,980          | 198,000     | ---                     | ---            |
|                                   | 1998      | 9,500        | 8,500        | 1,380          | 117,000     | ---                     | ---            |
|                                   | 1999      | 8,000        | 8,000        | 1,510          | 121,000     | ---                     | ---            |
|                                   | 2000      | 11,000       | 11,000       | 1,480          | 163,000     | ---                     | ---            |
|                                   | 2001      | 6,200        | 6,200        | 1,450          | 90,000      | ---                     | ---            |
|                                   | 2002      | 6,000        | 6,000        | 1,270          | 76,000      | ---                     | ---            |



**Field Crop Acreage, Production and Value, 1993-2002**

| Crop                        | Crop Year | Planted      | Harvested    | Yield Per Acre | Production  | Value Per Unit          | Total Value    |
|-----------------------------|-----------|--------------|--------------|----------------|-------------|-------------------------|----------------|
| Beans, Baby Lima Dry 1/ 2/  |           | <i>Acres</i> | <i>Acres</i> | <i>Pounds</i>  | <i>Cwt.</i> | <i>Dollars Per Cwt.</i> | <i>\$1,000</i> |
|                             | 1993      | 14,000       | 14,000       | 2,510          | 351,000     | ---                     | ---            |
|                             | 1994      | 26,000       | 24,500       | 2,490          | 609,000     | ---                     | ---            |
|                             | 1995      | 23,000       | 22,000       | 2,320          | 510,000     | ---                     | ---            |
|                             | 1996      | 24,000       | 23,000       | 2,250          | 517,000     | ---                     | ---            |
|                             | 1997      | 37,000       | 36,000       | 2,510          | 902,000     | ---                     | ---            |
|                             | 1998      | 13,000       | 12,000       | 1,700          | 204,000     | ---                     | ---            |
|                             | 1999      | 27,000       | 26,000       | 2,380          | 620,000     | ---                     | ---            |
|                             | 2000      | 24,500       | 23,500       | 2,310          | 542,000     | ---                     | ---            |
|                             | 2001      | 12,200       | 11,500       | 2,040          | 235,000     | ---                     | ---            |
|                             | 2002      | 21,500       | 21,000       | 2,390          | 501,000     | ---                     | ---            |
| Beans, Large Lima Dry 1/ 2/ |           | <i>Acres</i> | <i>Acres</i> | <i>Pounds</i>  | <i>Cwt.</i> | <i>Dollars Per Cwt.</i> | <i>\$1,000</i> |
|                             | 1993      | 15,000       | 15,000       | 2,330          | 350,000     | ---                     | ---            |
|                             | 1994      | 24,000       | 23,500       | 1,830          | 429,000     | ---                     | ---            |
|                             | 1995      | 21,000       | 20,000       | 2,080          | 415,000     | ---                     | ---            |
|                             | 1996      | 21,000       | 20,000       | 1,970          | 394,000     | ---                     | ---            |
|                             | 1997      | 30,000       | 29,000       | 2,480          | 718,000     | ---                     | ---            |
|                             | 1998      | 26,000       | 25,000       | 1,250          | 312,000     | ---                     | ---            |
|                             | 1999      | 25,000       | 24,000       | 1,800          | 433,000     | ---                     | ---            |
|                             | 2000      | 20,500       | 19,500       | 2,240          | 437,000     | ---                     | ---            |
|                             | 2001      | 14,800       | 14,500       | 2,250          | 326,000     | ---                     | ---            |
|                             | 2002      | 19,000       | 18,200       | 1,840          | 334,000     | ---                     | ---            |
| Beans, Pink Dry 1/ 2/       |           | <i>Acres</i> | <i>Acres</i> | <i>Pounds</i>  | <i>Cwt.</i> | <i>Dollars Per Cwt.</i> | <i>\$1,000</i> |
|                             | 1993      | 4,500        | 4,500        | 2,000          | 90,000      | ---                     | ---            |
|                             | 1994      | 7,000        | 7,000        | 2,160          | 151,000     | ---                     | ---            |
|                             | 1995      | 7,000        | 6,000        | 1,630          | 98,000      | ---                     | ---            |
|                             | 1996      | 8,000        | 8,000        | 1,560          | 125,000     | ---                     | ---            |
|                             | 1997      | 4,000        | 4,000        | 1,550          | 62,000      | ---                     | ---            |
|                             | 1998      | 5,500        | 5,500        | 1,070          | 59,000      | ---                     | ---            |
|                             | 1999      | 2,000        | 2,000        | 1,150          | 23,000      | ---                     | ---            |
|                             | 2000      | 700          | 700          | 860            | 6,000       | ---                     | ---            |
|                             | 2001      | ---          | ---          | ---            | ---         | ---                     | ---            |
|                             | 2002      | ---          | ---          | ---            | ---         | ---                     | ---            |
| Beans, Other Dry 1/ 2/ 3/   |           | <i>Acres</i> | <i>Acres</i> | <i>Pounds</i>  | <i>Cwt.</i> | <i>Dollars Per Cwt.</i> | <i>\$1,000</i> |
|                             | 1993      | 7,000        | 7,000        | 1,800          | 126,000     | ---                     | ---            |
|                             | 1994      | 12,000       | 11,500       | 1,400          | 161,000     | ---                     | ---            |
|                             | 1995      | 13,000       | 12,000       | 1,480          | 178,000     | ---                     | ---            |
|                             | 1996      | 11,000       | 11,000       | 1,430          | 157,000     | ---                     | ---            |
|                             | 1997      | 10,000       | 10,000       | 1,850          | 185,000     | ---                     | ---            |
|                             | 1998      | 12,500       | 12,500       | 1,320          | 165,000     | ---                     | ---            |
|                             | 1999      | 13,500       | 13,500       | 1,130          | 152,000     | ---                     | ---            |
|                             | 2000      | 12,500       | 12,500       | 1,250          | 156,000     | ---                     | ---            |
|                             | 2001      | 11,300       | 11,300       | 1,530          | 173,000     | ---                     | ---            |
|                             | 2002      | 11,900       | 10,900       | 1,920          | 209,000     | ---                     | ---            |
| Beans, All Dry Edible 3/    |           | <i>Acres</i> | <i>Acres</i> | <i>Pounds</i>  | <i>Cwt.</i> | <i>Dollars Per Cwt.</i> | <i>\$1,000</i> |
|                             | 1993      | 109,000      | 106,000      | 2,085          | 2,210,000   | 35.30                   | 78,013         |
|                             | 1994      | 136,000      | 131,000      | 2,120          | 2,771,000   | 34.80                   | 96,431         |
|                             | 1995      | 145,000      | 137,000      | 2,000          | 2,740,000   | 34.80                   | 95,352         |
|                             | 1996      | 128,000      | 123,000      | 1,890          | 2,325,000   | 38.50                   | 89,513         |
|                             | 1997      | 135,000      | 132,000      | 2,270          | 3,000,000   | 29.40                   | 88,200         |
|                             | 1998      | 110,000      | 105,000      | 1,480          | 1,554,000   | 36.10                   | 56,099         |
|                             | 1999      | 135,000      | 132,000      | 1,860          | 2,455,000   | 27.00                   | 66,285         |
|                             | 2000      | 115,000      | 112,000      | 1,840          | 2,059,000   | 26.80                   | 55,181         |
|                             | 2001      | 88,000       | 85,000       | 1,760          | 1,496,000   | 31.20                   | 46,675         |
|                             | 2002      | 92,000       | 89,000       | 1,980          | 1,762,000   | 32.00                   | 56,384         |

**Field Crop Acreage, Production and Value, 1993-2002**

| Crop                     | Crop Year | Planted      | Harvested    | Yield Per Acre | Production   | Value Per Unit         | Total Value    |
|--------------------------|-----------|--------------|--------------|----------------|--------------|------------------------|----------------|
| Corn For Grain 4/        |           | <i>Acres</i> | <i>Acres</i> | <i>Tons</i>    | <i>Tons</i>  | <i>Dollars Per Ton</i> | <i>\$1,000</i> |
|                          | 1993      | 400,000      | 170,000      | 4.62           | 785,400      | 113.93                 | 89,480         |
|                          | 1994      | 420,000      | 180,000      | 4.76           | 856,800      | 106.43                 | 91,188         |
|                          | 1995      | 435,000      | 150,000      | 4.48           | 672,000      | 141.07                 | 94,800         |
|                          | 1996      | 500,000      | 220,000      | 4.48           | 985,600      | 120.36                 | 118,624        |
|                          | 1997      | 585,000      | 265,000      | 4.76           | 1,261,400    | 108.93                 | 137,403        |
|                          | 1998      | 600,000      | 245,000      | 4.48           | 1,097,600    | 95.00                  | 104,272        |
|                          | 1999      | 525,000      | 185,000      | 4.76           | 880,600      | 89.29                  | 78,625         |
|                          | 2000      | 540,000      | 205,000      | 4.76           | 975,800      | 87.14                  | 85,034         |
|                          | 2001      | 480,000      | 160,000      | 4.76           | 761,600      | 87.50                  | 66,640         |
|                          | 2002      | 545,000      | 150,000      | 4.76           | 714,000      | 100.00                 | 71,400         |
| Corn For Silage 2/       |           | <i>Acres</i> | <i>Acres</i> | <i>Tons</i>    | <i>Tons</i>  | <i>Dollars Per Ton</i> | <i>\$1,000</i> |
|                          | 1993      | ---          | 225,000      | 25.00          | 5,625,000    | ---                    | ---            |
|                          | 1994      | ---          | 235,000      | 25.00          | 5,875,000    | ---                    | ---            |
|                          | 1995      | ---          | 280,000      | 25.00          | 7,000,000    | ---                    | ---            |
|                          | 1996      | ---          | 275,000      | 25.00          | 6,875,000    | ---                    | ---            |
|                          | 1997      | ---          | 315,000      | 26.00          | 8,190,000    | ---                    | ---            |
|                          | 1998      | ---          | 350,000      | 25.00          | 8,750,000    | ---                    | ---            |
|                          | 1999      | ---          | 335,000      | 26.00          | 8,710,000    | ---                    | ---            |
|                          | 2000      | ---          | 330,000      | 26.00          | 8,580,000    | ---                    | ---            |
|                          | 2001      | ---          | 315,000      | 26.00          | 8,190,000    | ---                    | ---            |
|                          | 2002      | ---          | 390,000      | 26.00          | 10,140,000   | ---                    | ---            |
| Cotton, American-Pima 5/ |           | <i>Acres</i> | <i>Acres</i> | <i>Pounds</i>  | <i>Bales</i> | <i>Cents Per Lb.</i>   | <i>\$1,000</i> |
|                          | 1993      | 91,000       | 91,000       | 1,132          | 214,600      | 84.0                   | 86,527         |
|                          | 1994      | 81,000       | 80,800       | 1,098          | 184,800      | 102.0                  | 90,478         |
|                          | 1995      | 115,000      | 115,000      | 937            | 224,500      | 126.0                  | 135,778        |
|                          | 1996      | 165,000      | 164,000      | 1,098          | 375,000      | 107.0                  | 192,600        |
|                          | 1997      | 185,000      | 184,000      | 1,141          | 437,200      | 102.0                  | 214,053        |
|                          | 1998      | 200,000      | 180,000      | 941            | 352,800      | 92.3                   | 156,305        |
|                          | 1999      | 240,000      | 239,000      | 1,210          | 602,700      | 85.1                   | 246,191        |
|                          | 2000      | 145,000      | 144,000      | 1,154          | 346,300      | 101.0                  | 167,886        |
|                          | 2001      | 240,000      | 239,000      | 1,283          | 639,000      | 85.6                   | 262,552        |
|                          | 2002      | 210,000      | 209,000      | 1,386          | 603,300      | 85.1                   | 246,436        |
| Cotton, Upland 5/        |           | <i>Acres</i> | <i>Acres</i> | <i>Pounds</i>  | <i>Bales</i> | <i>Cents Per Lb.</i>   | <i>\$1,000</i> |
|                          | 1993      | 1,050,000    | 1,045,000    | 1,340          | 2,918,000    | 65.7                   | 920,220        |
|                          | 1994      | 1,100,000    | 1,095,000    | 1,191          | 2,717,000    | 80.3                   | 1,047,240      |
|                          | 1995      | 1,170,000    | 1,165,000    | 953            | 2,312,000    | 82.1                   | 911,113        |
|                          | 1996      | 1,000,000    | 995,000      | 1,153          | 2,390,000    | 76.5                   | 877,608        |
|                          | 1997      | 880,000      | 875,000      | 1,202          | 2,191,000    | 73.2                   | 769,830        |
|                          | 1998      | 650,000      | 620,000      | 887            | 1,146,000    | 67.8                   | 372,954        |
|                          | 1999      | 610,000      | 605,000      | 1,254          | 1,580,000    | 56.2                   | 426,221        |
|                          | 2000      | 775,000      | 770,000      | 1,378          | 2,210,000    | 52.0                   | 551,616        |
|                          | 2001      | 630,000      | 625,000      | 1,359          | 1,770,000    | 41.6                   | 353,434        |
|                          | 2002      | 480,000      | 477,000      | 1,469          | 1,460,000    | 53.8                   | 377,030        |
| Cotton, All 5/           |           | <i>Acres</i> | <i>Acres</i> | <i>Pounds</i>  | <i>Bales</i> | <i>Cents Per Lb.</i>   | <i>\$1,000</i> |
|                          | 1993      | 1,141,000    | 1,136,000    | 1,324          | 3,132,600    | 67.0                   | 1,006,747      |
|                          | 1994      | 1,181,000    | 1,175,800    | 1,185          | 2,901,800    | 81.7                   | 1,137,718      |
|                          | 1995      | 1,285,000    | 1,280,000    | 951            | 2,536,500    | 86.0                   | 1,046,891      |
|                          | 1996      | 1,165,000    | 1,159,000    | 1,145          | 2,765,000    | 80.6                   | 1,070,208      |
|                          | 1997      | 1,065,000    | 1,059,000    | 1,191          | 2,628,200    | 78.0                   | 983,883        |
|                          | 1998      | 850,000      | 800,000      | 899            | 1,498,800    | 73.6                   | 529,259        |
|                          | 1999      | 850,000      | 844,000      | 1,241          | 2,182,700    | 64.2                   | 672,412        |
|                          | 2000      | 920,000      | 914,000      | 1,342          | 2,556,300    | 58.6                   | 719,502        |
|                          | 2001      | 870,000      | 864,000      | 1,338          | 2,409,000    | 53.3                   | 615,986        |
|                          | 2002      | 690,000      | 686,000      | 1,406          | 2,063,300    | 63.0                   | 623,466        |

# Field Crop Acreage, Production and Value, 1993-2002

| Crop            | Crop Year | Planted      | Harvested    | Yield Per Acre | Production  | Value Per Unit         | Total Value    |
|-----------------|-----------|--------------|--------------|----------------|-------------|------------------------|----------------|
| Cottonseed 2/   |           | <i>Acres</i> | <i>Acres</i> | <i>Tons</i>    | <i>Tons</i> | <i>Dollars Per Ton</i> | <i>\$1,000</i> |
|                 | 1993      | ---          | ---          | ---            | 1,142,000   | 132.00                 | 150,744        |
|                 | 1994      | ---          | ---          | ---            | 1,063,000   | 143.00                 | 152,009        |
|                 | 1995      | ---          | ---          | ---            | 940,000     | 132.00                 | 124,080        |
|                 | 1996      | ---          | ---          | ---            | 1,020,000   | 176.00                 | 179,520        |
|                 | 1997      | ---          | ---          | ---            | 942,000     | 174.00                 | 163,908        |
|                 | 1998      | ---          | ---          | ---            | 544,000     | 177.00                 | 96,288         |
|                 | 1999      | ---          | ---          | ---            | 799,000     | 137.00                 | 109,463        |
|                 | 2000      | ---          | ---          | ---            | 909,000     | 139.00                 | 126,351        |
|                 | 2001      | ---          | ---          | ---            | 849,000     | 142.00                 | 120,558        |
|                 | 2002      | ---          | ---          | ---            | 731,000     | 139.00                 | 101,609        |
| Hay, Alfalfa 2/ |           | <i>Acres</i> | <i>Acres</i> | <i>Tons</i>    | <i>Tons</i> | <i>Dollars Per Ton</i> | <i>\$1,000</i> |
|                 | 1993      | ---          | 920,000      | 6.90           | 6,348,000   | 105.00                 | 666,540        |
|                 | 1994      | ---          | 950,000      | 7.00           | 6,650,000   | 112.00                 | 744,800        |
|                 | 1995      | ---          | 940,000      | 6.90           | 6,486,000   | 101.00                 | 655,086        |
|                 | 1996      | ---          | 940,000      | 7.00           | 6,580,000   | 110.00                 | 723,800        |
|                 | 1997      | ---          | 950,000      | 7.20           | 6,840,000   | 119.00                 | 813,960        |
|                 | 1998      | ---          | 1,050,000    | 6.60           | 6,930,000   | 98.00                  | 679,140        |
|                 | 1999      | ---          | 1,050,000    | 6.90           | 7,245,000   | 90.00                  | 652,050        |
|                 | 2000      | ---          | 1,020,000    | 7.00           | 7,140,000   | 92.00                  | 656,880        |
|                 | 2001      | ---          | 1,010,000    | 7.20           | 7,272,000   | 119.00                 | 865,368        |
|                 | 2002      | ---          | 1,140,000    | 7.10           | 8,094,000   | 98.50                  | 797,259        |
| Hay, Other 2/   |           | <i>Acres</i> | <i>Acres</i> | <i>Tons</i>    | <i>Tons</i> | <i>Dollars Per Ton</i> | <i>\$1,000</i> |
|                 | 1993      | ---          | 460,000      | 2.70           | 1,242,000   | 74.00                  | 91,908         |
|                 | 1994      | ---          | 520,000      | 3.00           | 1,560,000   | 69.50                  | 108,420        |
|                 | 1995      | ---          | 530,000      | 3.50           | 1,855,000   | 67.50                  | 125,213        |
|                 | 1996      | ---          | 510,000      | 2.80           | 1,428,000   | 82.00                  | 117,096        |
|                 | 1997      | ---          | 560,000      | 2.80           | 1,568,000   | 98.00                  | 153,664        |
|                 | 1998      | ---          | 580,000      | 2.80           | 1,624,000   | 68.00                  | 110,432        |
|                 | 1999      | ---          | 530,000      | 2.90           | 1,537,000   | 75.00                  | 115,275        |
|                 | 2000      | ---          | 510,000      | 2.80           | 1,428,000   | 78.50                  | 112,098        |
|                 | 2001      | ---          | 530,000      | 3.10           | 1,643,000   | 93.50                  | 153,621        |
|                 | 2002      | ---          | 500,000      | 3.00           | 1,500,000   | 77.50                  | 116,250        |
| Hay, All 2/ 6/  |           | <i>Acres</i> | <i>Acres</i> | <i>Tons</i>    | <i>Tons</i> | <i>Dollars Per Ton</i> | <i>\$1,000</i> |
|                 | 1993      | ---          | 1,380,000    | 5.50           | 7,590,000   | 102.00                 | 758,448        |
|                 | 1994      | ---          | 1,470,000    | 5.59           | 8,210,000   | 107.00                 | 853,220        |
|                 | 1995      | ---          | 1,470,000    | 5.67           | 8,341,000   | 98.50                  | 780,299        |
|                 | 1996      | ---          | 1,450,000    | 5.52           | 8,008,000   | 108.00                 | 840,896        |
|                 | 1997      | ---          | 1,510,000    | 5.57           | 8,408,000   | 117.00                 | 967,624        |
|                 | 1998      | ---          | 1,630,000    | 5.25           | 8,554,000   | 96.00                  | 789,572        |
|                 | 1999      | ---          | 1,580,000    | 5.56           | 8,782,000   | 89.00                  | 767,325        |
|                 | 2000      | ---          | 1,530,000    | 5.60           | 8,568,000   | 90.50                  | 768,978        |
|                 | 2001      | ---          | 1,540,000    | 5.79           | 8,915,000   | 115.00                 | 1,018,989      |
|                 | 2002      | ---          | 1,640,000    | 5.85           | 9,594,000   | 95.50                  | 913,509        |
| Oats            |           | <i>Acres</i> | <i>Acres</i> | <i>Tons</i>    | <i>Tons</i> | <i>Dollars Per Ton</i> | <i>\$1,000</i> |
|                 | 1993      | 300,000      | 30,000       | 1.28           | 38,400      | 115.63                 | 4,440          |
|                 | 1994      | 310,000      | 30,000       | 1.28           | 38,400      | 183.13                 | 7,032          |
|                 | 1995      | 350,000      | 30,000       | 1.36           | 40,800      | 130.63                 | 5,330          |
|                 | 1996      | 300,000      | 30,000       | 1.20           | 36,000      | 138.75                 | 4,995          |
|                 | 1997      | 350,000      | 30,000       | 1.28           | 38,400      | 123.75                 | 4,752          |
|                 | 1998      | 320,000      | 30,000       | 1.20           | 36,000      | 85.00                  | 3,060          |
|                 | 1999      | 275,000      | 25,000       | 1.36           | 34,000      | 93.75                  | 3,188          |
|                 | 2000      | 220,000      | 25,000       | 1.20           | 30,000      | 96.88                  | 2,906          |
|                 | 2001      | 260,000      | 15,000       | 0.96           | 14,400      | 140.63                 | 2,025          |
|                 | 2002      | 260,000      | 27,000       | 1.28           | 34,600      | 168.75                 | 5,832          |

**Field Crop Acreage, Production and Value, 1993-2002**

| Crop                               | Crop Year | Planted      | Harvested    | Yield Per Acre | Production  | Value Per Unit          | Total Value    |
|------------------------------------|-----------|--------------|--------------|----------------|-------------|-------------------------|----------------|
| Potatoes, Winter                   |           | <i>Acres</i> | <i>Acres</i> | <i>Cwt.</i>    | <i>Cwt.</i> | <i>Dollars Per Cwt.</i> | <i>\$1,000</i> |
|                                    | 1993      | 5,600        | 5,200        | 200            | 1,040,000   | 20.20                   | 21,008         |
|                                    | 1994      | 4,500        | 4,500        | 215            | 968,000     | 21.10                   | 20,425         |
|                                    | 1995      | 5,000        | 5,000        | 260            | 1,300,000   | 18.20                   | 23,660         |
|                                    | 1996      | 5,700        | 5,700        | 250            | 1,425,000   | 21.10                   | 30,068         |
|                                    | 1997      | 6,600        | 6,600        | 235            | 1,551,000   | 18.10                   | 28,073         |
|                                    | 1998      | 7,000        | 7,000        | 220            | 1,540,000   | 22.40                   | 34,496         |
|                                    | 1999      | 8,500        | 8,500        | 260            | 2,210,000   | 22.60                   | 49,946         |
|                                    | 2000      | 9,000        | 9,000        | 320            | 2,880,000   | 17.00                   | 48,960         |
|                                    | 2001      | 9,000        | 9,000        | 310            | 2,790,000   | 19.70                   | 54,963         |
|                                    | 2002      | 9,000        | 9,000        | 270            | 2,430,000   | 24.00                   | 58,320         |
| Potatoes, Spring                   |           | <i>Acres</i> | <i>Acres</i> | <i>Cwt.</i>    | <i>Cwt.</i> | <i>Dollars Per Cwt.</i> | <i>\$1,000</i> |
|                                    | 1993      | 19,500       | 19,500       | 385            | 7,508,000   | 13.00                   | 97,604         |
|                                    | 1994      | 20,500       | 20,500       | 380            | 7,790,000   | 11.60                   | 90,364         |
|                                    | 1995      | 18,000       | 17,800       | 350            | 6,230,000   | 13.60                   | 84,728         |
|                                    | 1996      | 20,100       | 20,100       | 375            | 7,538,000   | 13.00                   | 97,994         |
|                                    | 1997      | 20,700       | 20,700       | 390            | 8,073,000   | 9.85                    | 79,519         |
|                                    | 1998      | 18,500       | 18,500       | 335            | 6,198,000   | 10.50                   | 65,079         |
|                                    | 1999      | 19,000       | 19,000       | 400            | 7,600,000   | 10.80                   | 82,080         |
|                                    | 2000      | 18,800       | 18,800       | 395            | 7,426,000   | 12.20                   | 90,597         |
|                                    | 2001      | 15,500       | 15,500       | 390            | 6,045,000   | 12.40                   | 74,958         |
|                                    | 2002      | 19,000       | 19,000       | 405            | 7,695,000   | 19.80                   | 152,361        |
| Potatoes, Summer                   |           | <i>Acres</i> | <i>Acres</i> | <i>Cwt.</i>    | <i>Cwt.</i> | <i>Dollars Per Cwt.</i> | <i>\$1,000</i> |
|                                    | 1993      | 4,800        | 4,800        | 330            | 1,584,000   | 13.30                   | 21,067         |
|                                    | 1994      | 5,700        | 5,700        | 370            | 2,109,000   | 13.00                   | 27,417         |
|                                    | 1995      | 5,500        | 5,500        | 320            | 1,760,000   | 17.50                   | 30,800         |
|                                    | 1996      | 5,800        | 5,800        | 360            | 2,088,000   | 14.60                   | 30,485         |
|                                    | 1997      | 5,900        | 5,900        | 360            | 2,124,000   | 14.50                   | 30,798         |
|                                    | 1998      | 6,200        | 6,100        | 355            | 2,166,000   | 11.90                   | 25,775         |
|                                    | 1999      | 6,700        | 6,700        | 360            | 2,412,000   | 12.80                   | 30,874         |
|                                    | 2000      | 7,500        | 7,500        | 355            | 2,663,000   | 18.10                   | 48,200         |
|                                    | 2001      | 8,000        | 8,000        | 355            | 2,840,000   | 15.10                   | 42,884         |
|                                    | 2002      | 7,300        | 7,300        | 360            | 2,628,000   | 19.10                   | 50,195         |
| Potatoes, Fall                     |           | <i>Acres</i> | <i>Acres</i> | <i>Cwt.</i>    | <i>Cwt.</i> | <i>Dollars Per Cwt.</i> | <i>\$1,000</i> |
|                                    | 1993      | 12,000       | 12,000       | 400            | 4,800,000   | 9.35                    | 44,880         |
|                                    | 1994      | 14,000       | 14,000       | 400            | 5,600,000   | 6.05                    | 33,880         |
|                                    | 1995      | 13,000       | 13,000       | 410            | 5,330,000   | 9.65                    | 51,435         |
|                                    | 1996      | 11,500       | 11,500       | 400            | 4,600,000   | 4.80                    | 22,080         |
|                                    | 1997      | 10,500       | 10,500       | 400            | 4,200,000   | 8.10                    | 34,020         |
|                                    | 1998      | 10,300       | 10,300       | 360            | 3,708,000   | 8.40                    | 31,147         |
|                                    | 1999      | 9,000        | 9,000        | 445            | 4,005,000   | 7.35                    | 29,437         |
|                                    | 2000      | 8,700        | 8,700        | 430            | 3,741,000   | 5.80                    | 21,698         |
|                                    | 2001      | 3,200        | 3,200        | 445            | 1,424,000   | 8.15                    | 11,606         |
|                                    | 2002      | 8,000        | 8,200        | 520            | 4,264,000   | 8.45                    | 36,031         |
| Potatoes, All<br>(Excluding Sweet) |           | <i>Acres</i> | <i>Acres</i> | <i>Cwt.</i>    | <i>Cwt.</i> | <i>Dollars Per Cwt.</i> | <i>\$1,000</i> |
|                                    | 1993      | 41,900       | 41,500       | 360            | 14,932,000  | 12.40                   | 184,559        |
|                                    | 1994      | 44,700       | 44,700       | 368            | 16,467,000  | 10.60                   | 172,086        |
|                                    | 1995      | 41,500       | 41,300       | 354            | 14,620,000  | 13.10                   | 190,623        |
|                                    | 1996      | 43,100       | 43,100       | 363            | 15,651,000  | 11.70                   | 180,627        |
|                                    | 1997      | 43,700       | 43,700       | 365            | 15,948,000  | 10.90                   | 172,410        |
|                                    | 1998      | 42,000       | 41,900       | 325            | 13,612,000  | 11.60                   | 156,497        |
|                                    | 1999      | 43,200       | 43,200       | 376            | 16,227,000  | 11.90                   | 192,337        |
|                                    | 2000      | 44,000       | 44,000       | 380            | 16,710,000  | 12.50                   | 209,455        |
|                                    | 2001      | 35,700       | 35,700       | 367            | 13,099,000  | 14.20                   | 184,411        |
|                                    | 2002      | 43,500       | 43,500       | 391            | 17,017,000  | 17.50                   | 296,907        |

**Field Crop Acreage, Production and Value, 1993-2002**

| Crop            | Crop Year | Planted      | Harvested    | Yield Per Acre | Production  | Value Per Unit          | Total Value    |
|-----------------|-----------|--------------|--------------|----------------|-------------|-------------------------|----------------|
| Potatoes, Sweet |           | <i>Acres</i> | <i>Acres</i> | <i>Cwt.</i>    | <i>Cwt.</i> | <i>Dollars Per Cwt.</i> | <i>\$1,000</i> |
|                 | 1993      | 8,300        | 8,300        | 210            | 1,743,000   | 24.30                   | 42,355         |
|                 | 1994      | 8,200        | 8,200        | 205            | 1,681,000   | 28.70                   | 48,245         |
|                 | 1995      | 9,600        | 9,600        | 200            | 1,920,000   | 33.00                   | 63,360         |
|                 | 1996      | 9,600        | 9,600        | 225            | 2,160,000   | 26.10                   | 56,376         |
|                 | 1997      | 9,700        | 9,700        | 205            | 1,989,000   | 28.00                   | 55,692         |
|                 | 1998      | 9,700        | 9,700        | 220            | 2,134,000   | 25.80                   | 55,057         |
|                 | 1999      | 10,000       | 10,000       | 240            | 2,400,000   | 28.80                   | 69,120         |
|                 | 2000      | 10,500       | 10,500       | 250            | 2,625,000   | 24.10                   | 63,263         |
|                 | 2001      | 10,000       | 10,000       | 230            | 2,300,000   | 26.90                   | 61,870         |
|                 | 2002      | 10,400       | 10,400       | 235            | 2,444,000   | 23.10                   | 56,456         |
| Rice, Long 2/   |           | <i>Acres</i> | <i>Acres</i> | <i>Cwt.</i>    | <i>Cwt.</i> | <i>Dollars Per Cwt.</i> | <i>\$1,000</i> |
|                 | 1993      | 14,000       | 14,000       | 81.80          | 1,145,000   | ---                     | ---            |
|                 | 1994      | 7,000        | 7,000        | 81.00          | 567,000     | ---                     | ---            |
|                 | 1995      | 8,000        | 8,000        | 75.00          | 600,000     | ---                     | ---            |
|                 | 1996      | 5,000        | 5,000        | 72.00          | 360,000     | ---                     | ---            |
|                 | 1997      | 9,000        | 9,000        | 77.00          | 693,000     | ---                     | ---            |
|                 | 1998      | 9,000        | 9,000        | 59.70          | 537,000     | ---                     | ---            |
|                 | 1999      | 5,000        | 5,000        | 68.00          | 340,000     | ---                     | ---            |
|                 | 2000      | 9,000        | 9,000        | 71.00          | 639,000     | ---                     | ---            |
|                 | 2001      | 13,000       | 13,000       | 77.00          | 1,001,000   | ---                     | ---            |
|                 | 2002      | 7,000        | 7,000        | 64.00          | 448,000     | ---                     | ---            |
| Rice, Medium 2/ |           | <i>Acres</i> | <i>Acres</i> | <i>Cwt.</i>    | <i>Cwt.</i> | <i>Dollars Per Cwt.</i> | <i>\$1,000</i> |
|                 | 1993      | 413,000      | 410,000      | 83.20          | 34,112,000  | ---                     | ---            |
|                 | 1994      | 470,000      | 468,000      | 85.10          | 39,827,000  | ---                     | ---            |
|                 | 1995      | 449,000      | 447,000      | 76.00          | 33,972,000  | ---                     | ---            |
|                 | 1996      | 484,000      | 482,000      | 75.00          | 36,150,000  | ---                     | ---            |
|                 | 1997      | 493,000      | 491,000      | 82.60          | 40,557,000  | ---                     | ---            |
|                 | 1998      | 420,000      | 418,000      | 69.90          | 29,218,000  | ---                     | ---            |
|                 | 1999      | 455,000      | 450,000      | 73.00          | 32,850,000  | ---                     | ---            |
|                 | 2000      | 507,000      | 505,000      | 80.00          | 40,400,000  | ---                     | ---            |
|                 | 2001      | 435,000      | 433,000      | 83.00          | 35,939,000  | ---                     | ---            |
|                 | 2002      | 500,000      | 495,000      | 83.00          | 41,085,000  | ---                     | ---            |
| Rice, Short 2/  |           | <i>Acres</i> | <i>Acres</i> | <i>Cwt.</i>    | <i>Cwt.</i> | <i>Dollars Per Cwt.</i> | <i>\$1,000</i> |
|                 | 1993      | 13,000       | 13,000       | 78.00          | 1,014,000   | ---                     | ---            |
|                 | 1994      | 10,000       | 10,000       | 83.00          | 830,000     | ---                     | ---            |
|                 | 1995      | 10,000       | 10,000       | 78.00          | 780,000     | ---                     | ---            |
|                 | 1996      | 13,000       | 13,000       | 73.00          | 949,000     | ---                     | ---            |
|                 | 1997      | 16,000       | 16,000       | 81.00          | 1,296,000   | ---                     | ---            |
|                 | 1998      | 31,000       | 31,000       | 52.60          | 1,631,000   | ---                     | ---            |
|                 | 1999      | 50,000       | 50,000       | 70.00          | 3,500,000   | ---                     | ---            |
|                 | 2000      | 34,000       | 34,000       | 73.00          | 2,482,000   | ---                     | ---            |
|                 | 2001      | 25,000       | 25,000       | 62.00          | 1,550,000   | ---                     | ---            |
|                 | 2002      | 26,000       | 26,000       | 56.00          | 1,456,000   | ---                     | ---            |
| Rice, All 7/    |           | <i>Acres</i> | <i>Acres</i> | <i>Cwt.</i>    | <i>Cwt.</i> | <i>Dollars Per Cwt.</i> | <i>\$1,000</i> |
|                 | 1993      | 440,000      | 437,000      | 83.00          | 36,271,000  | 8.27                    | 299,961        |
|                 | 1994      | 487,000      | 485,000      | 85.00          | 41,224,000  | 6.97                    | 287,331        |
|                 | 1995      | 467,000      | 465,000      | 76.00          | 35,352,000  | 8.79                    | 310,744        |
|                 | 1996      | 502,000      | 500,000      | 74.90          | 37,459,000  | 7.91                    | 296,301        |
|                 | 1997      | 518,000      | 516,000      | 82.50          | 42,546,000  | 7.95                    | 338,241        |
|                 | 1998      | 460,000      | 458,000      | 68.50          | 31,386,000  | 9.19                    | 288,437        |
|                 | 1999      | 510,000      | 505,000      | 72.70          | 36,690,000  | 6.97                    | 255,729        |
|                 | 2000      | 550,000      | 548,000      | 79.40          | 43,521,000  | 4.99                    | 217,170        |
|                 | 2001      | 473,000      | 471,000      | 81.70          | 38,490,000  | 5.28                    | 203,227        |
|                 | 2002      | 533,000      | 528,000      | 81.40          | 42,989,000  | 5.00                    | 214,945        |

**Field Crop Acreage, Production and Value, 1993-2002**

| Crop                               | Crop Year | Planted      | Harvested    | Yield Per Acre | Production  | Value Per Unit         | Total Value    |
|------------------------------------|-----------|--------------|--------------|----------------|-------------|------------------------|----------------|
| Sorghum For Grain 4/ 8/            |           | <i>Acres</i> | <i>Acres</i> | <i>Tons</i>    | <i>Tons</i> | <i>Dollars Per Ton</i> | <i>\$1,000</i> |
|                                    | 2000      | 12,000       | 8,000        | 2.10           | 16,800      | 82.20                  | 1,380          |
|                                    | 2001      | 10,000       | 7,000        | 2.52           | 17,600      | 87.60                  | 1,545          |
|                                    | 2002      | 15,000       | 11,000       | 2.66           | 29,300      | 110.00                 | 3,219          |
| Sorghum For Silage 2/ 8/           |           | <i>Acres</i> | <i>Acres</i> | <i>Tons</i>    | <i>Tons</i> | <i>Dollars Per Ton</i> | <i>\$1,000</i> |
|                                    | 2000      | ---          | 4,000        | 15.00          | 60,000      | ---                    | ---            |
|                                    | 2001      | ---          | 3,000        | 20.00          | 60,000      | ---                    | ---            |
|                                    | 2002      | ---          | 4,000        | 17.00          | 68,000      | ---                    | ---            |
| Sugar Beets 2/ 9/                  |           | <i>Acres</i> | <i>Acres</i> | <i>Tons</i>    | <i>Tons</i> | <i>Dollars Per Ton</i> | <i>\$1,000</i> |
|                                    | 1993      | 138,000      | 136,000      | 26.00          | 3,536,000   | 35.50                  | 125,528        |
|                                    | 1994      | 143,000      | 141,000      | 28.00          | 3,948,000   | 33.50                  | 132,258        |
|                                    | 1995      | 116,000      | 114,000      | 28.00          | 3,192,000   | 39.40                  | 125,765        |
|                                    | 1996      | 84,000       | 82,000       | 29.50          | 2,419,000   | 43.00                  | 104,017        |
|                                    | 1997      | 101,000      | 99,000       | 30.00          | 2,970,000   | 40.60                  | 120,582        |
|                                    | 1998      | 101,000      | 99,000       | 27.50          | 2,723,000   | 39.80                  | 108,375        |
|                                    | 1999      | 110,000      | 108,000      | 32.00          | 3,456,000   | 36.80                  | 127,181        |
|                                    | 2000      | 98,000       | 92,500       | 34.00          | 3,145,000   | 30.40                  | 95,608         |
|                                    | 2001      | 46,600       | 44,700       | 35.70          | 1,596,000   | 33.40                  | 53,306         |
|                                    | 2002      | 50,200       | 49,900       | 39.50          | 1,971,000   | ---                    | ---            |
| Wheat, Winter<br>(Excluding Durum) |           | <i>Acres</i> | <i>Acres</i> | <i>Tons</i>    | <i>Tons</i> | <i>Dollars Per Ton</i> | <i>\$1,000</i> |
|                                    | 1993      | 550,000      | 500,000      | 2.31           | 1,155,000   | 105.00                 | 121,275        |
|                                    | 1994      | 590,000      | 510,000      | 2.28           | 1,162,800   | 117.33                 | 136,435        |
|                                    | 1995      | 580,000      | 425,000      | 1.83           | 777,800     | 138.33                 | 107,589        |
|                                    | 1996      | 640,000      | 550,000      | 2.07           | 1,138,500   | 163.33                 | 185,955        |
|                                    | 1997      | 510,000      | 400,000      | 2.10           | 840,000     | 123.67                 | 103,880        |
|                                    | 1998      | 500,000      | 380,000      | 1.80           | 684,000     | 98.67                  | 67,488         |
|                                    | 1999      | 500,000      | 370,000      | 2.34           | 865,800     | 91.67                  | 79,365         |
|                                    | 2000      | 535,000      | 390,000      | 2.10           | 819,000     | 89.00                  | 72,891         |
|                                    | 2001      | 530,000      | 380,000      | 2.10           | 798,000     | 97.67                  | 77,938         |
|                                    | 2002      | 530,000      | 300,000      | 2.25           | 675,000     | 116.67                 | 78,750         |
| Wheat, Durum                       |           | <i>Acres</i> | <i>Acres</i> | <i>Tons</i>    | <i>Tons</i> | <i>Dollars Per Ton</i> | <i>\$1,000</i> |
|                                    | 1993      | 41,000       | 40,000       | 2.85           | 114,000     | 136.00                 | 15,504         |
|                                    | 1994      | 60,000       | 59,000       | 2.85           | 168,200     | 153.67                 | 25,839         |
|                                    | 1995      | 70,000       | 68,000       | 3.00           | 204,000     | 165.00                 | 33,660         |
|                                    | 1996      | 140,000      | 138,000      | 3.00           | 414,000     | 171.33                 | 70,932         |
|                                    | 1997      | 145,000      | 144,000      | 2.85           | 410,400     | 142.67                 | 58,550         |
|                                    | 1998      | 180,000      | 175,000      | 2.70           | 472,500     | 127.67                 | 60,323         |
|                                    | 1999      | 90,000       | 85,000       | 3.15           | 267,800     | 123.33                 | 33,023         |
|                                    | 2000      | 100,000      | 97,000       | 3.00           | 291,000     | 106.33                 | 30,943         |
|                                    | 2001      | 85,000       | 81,000       | 3.15           | 255,200     | 129.00                 | 32,914         |
|                                    | 2002      | 95,000       | 90,000       | 3.00           | 270,000     | 131.67                 | 35,550         |

### Field Crop Acreage, Production and Value, 1993-2002

| Crop       | Crop Year | Planted      | Harvested    | Yield Per Acre | Production  | Value Per Unit         | Total Value    |
|------------|-----------|--------------|--------------|----------------|-------------|------------------------|----------------|
| Wheat, All |           | <i>Acres</i> | <i>Acres</i> | <i>Tons</i>    | <i>Tons</i> | <i>Dollars Per Ton</i> | <i>\$1,000</i> |
|            | 1993      | 591,000      | 540,000      | 2.35           | 1,269,000   | 107.78                 | 136,779        |
|            | 1994      | 650,000      | 569,000      | 2.34           | 1,331,000   | 121.92                 | 162,274        |
|            | 1995      | 650,000      | 493,000      | 1.99           | 981,800     | 143.87                 | 141,249        |
|            | 1996      | 780,000      | 688,000      | 2.26           | 1,552,500   | 165.47                 | 256,887        |
|            | 1997      | 655,000      | 544,000      | 2.30           | 1,250,400   | 129.90                 | 162,430        |
|            | 1998      | 680,000      | 555,000      | 2.09           | 1,156,500   | 100.67                 | 127,811        |
|            | 1999      | 590,000      | 455,000      | 2.49           | 1,133,600   | 94.67                  | 112,388        |
|            | 2000      | 635,000      | 487,000      | 2.28           | 1,110,000   | 94.00                  | 103,834        |
|            | 2001      | 615,000      | 461,000      | 2.28           | 1,053,200   | 103.67                 | 110,852        |
|            | 2002      | 625,000      | 390,000      | 2.42           | 945,000     | 121.67                 | 114,300        |

1/ Production is on a clean basis.

2/ Dashes represent data not published due to the estimate being discontinued, not estimated, or not available.

3/ Includes varieties not listed separately. Excludes beans grown for garden seed.

4/ Planted acreage is for all purposes.

5/ Cotton bales are 480 lbs. net-weight.

6/ Estimated marketings of alfalfa and other hay used as weights to calculate all hay price for 1993-02.

7/ Excludes sweet and wild rice.

8/ Initiated in 2000.

9/ Relates to year of intended harvest for fall planted beets in central California and to year of planting for overwintered beets in central and southern California.

**Field Crop Monthly Average Prices Received, 1993-2002**

| Crop                 | Crop Year | Jan.                    | Feb.   | Mar.   | Apr.   | May    | June   | July   | Aug.   | Sept.  | Oct.   | Nov.   | Dec.   |
|----------------------|-----------|-------------------------|--------|--------|--------|--------|--------|--------|--------|--------|--------|--------|--------|
| Barley               |           | <i>Dollars Per Ton</i>  |        |        |        |        |        |        |        |        |        |        |        |
|                      | 1993      | 112.00                  | 110.00 | 115.00 | 109.00 | 100.00 | 107.00 | 101.00 | 101.00 | 103.00 | 93.40  | 103.00 | 101.00 |
|                      | 1994      | 113.00                  | 1/     | 106.00 | 106.00 | 108.00 | 108.00 | 104.00 | 108.00 | 1/     | 1/     | 1/     | 113.00 |
|                      | 1995      | 1/                      | 113.00 | 112.00 | 1/     | 122.00 | 1/     | 1/     | 115.00 | 123.00 | 1/     | 139.00 | 142.00 |
|                      | 1996      | 137.00                  | 164.00 | 173.00 | 168.00 | 167.00 | 172.00 | 160.00 | 157.00 | 143.00 | 1/     | 127.00 | 1/     |
|                      | 1997      | 128.00                  | 1/     | 126.00 | 1/     | 128.00 | 121.00 | 1/     | 121.00 | 1/     | 1/     | 1/     | 1/     |
|                      | 1998      | 118.00                  | 117.00 | 115.00 | 1/     | 1/     | 1/     | 101.00 | 1/     | 1/     | 1/     | 1/     | 1/     |
|                      | 1999      | 1/                      | 1/     | 1/     | 1/     | 89.20  | 88.30  | 94.60  | 93.30  | 97.50  | 90.40  | 105.00 | 1/     |
|                      | 2000      | 93.80                   | 102.00 | 103.00 | 99.20  | 101.00 | 103.00 | 101.00 | 96.30  | 1/     | 1/     | 1/     | 1/     |
|                      | 2001      | 1/                      | 1/     | 1/     | 1/     | 1/     | 99.60  | 93.80  | 90.80  | 91.30  | 100.80 | 1/     | 95.00  |
|                      | 2002      | 1/                      | 1/     | 1/     | 1/     | 1/     | 102.90 | 1/     | 1/     | 1/     | 1/     | 1/     | 1/     |
| Beans, Dry Edible    |           | <i>Dollars Per Cwt.</i> |        |        |        |        |        |        |        |        |        |        |        |
|                      | 1993      | 25.00                   | 24.80  | 24.70  | 24.20  | 23.60  | 24.20  | 24.80  | 27.40  | 29.40  | 31.20  | 35.50  | 34.80  |
|                      | 1994      | 36.90                   | 36.70  | 36.30  | 37.00  | 36.00  | 36.00  | 37.80  | 36.90  | 36.20  | 33.00  | 35.10  | 34.10  |
|                      | 1995      | 35.40                   | 35.10  | 35.40  | 34.60  | 35.00  | 35.70  | 35.20  | 34.40  | 34.40  | 34.00  | 34.60  | 33.80  |
|                      | 1996      | 34.10                   | 34.60  | 34.30  | 34.70  | 35.30  | 36.20  | 36.30  | 36.90  | 37.20  | 36.10  | 37.70  | 38.70  |
|                      | 1997      | 38.90                   | 39.60  | 39.50  | 39.40  | 39.60  | 38.70  | 39.10  | 37.80  | 31.10  | 30.00  | 29.70  | 29.60  |
|                      | 1998      | 29.10                   | 28.60  | 28.10  | 28.60  | 27.80  | 28.60  | 30.40  | 31.20  | 31.20  | 31.30  | 31.90  | 37.80  |
|                      | 1999      | 39.40                   | 39.80  | 39.40  | 38.90  | 37.60  | 36.20  | 36.20  | 34.50  | 29.30  | 27.60  | 27.20  | 27.60  |
|                      | 2000      | 27.10                   | 26.80  | 26.70  | 27.00  | 26.40  | 26.60  | 26.00  | 25.80  | 27.20  | 27.10  | 27.20  | 26.60  |
|                      | 2001      | 26.90                   | 26.90  | 26.60  | 26.80  | 26.80  | 26.30  | 26.30  | 27.00  | 27.20  | 28.60  | 31.50  | 31.20  |
|                      | 2002      | 31.80                   | 31.60  | 32.70  | 32.20  | 32.30  | 31.90  | 32.40  | 33.40  | 32.50  | 31.70  | 31.60  | 32.60  |
| Cotton Lint, Upland  |           | <i>Cents Per Pound</i>  |        |        |        |        |        |        |        |        |        |        |        |
|                      | 1993      | 62.50                   | 63.30  | 62.90  | 62.40  | 59.50  | 59.70  | 1/     | 57.60  | 54.50  | 56.10  | 60.20  | 62.30  |
|                      | 1994      | 67.10                   | 70.40  | 72.20  | 72.40  | 72.40  | 76.40  | 70.80  | 65.40  | 64.80  | 68.80  | 75.40  | 79.30  |
|                      | 1995      | 94.50                   | 94.80  | 108.00 | 113.20 | 107.90 | 97.90  | 99.40  | 78.40  | 83.30  | 78.90  | 80.30  | 84.10  |
|                      | 1996      | 84.70                   | 83.80  | 85.20  | 86.30  | 80.60  | 82.10  | 80.00  | 77.00  | 77.60  | 75.60  | 77.00  | 77.50  |
|                      | 1997      | 76.60                   | 77.60  | 77.40  | 73.70  | 75.50  | 74.50  | 74.30  | 68.40  | 1/     | 76.90  | 74.70  | 69.70  |
|                      | 1998      | 73.40                   | 71.30  | 71.30  | 68.60  | 71.50  | 77.50  | 1/     | 71.80  | 68.80  | 69.70  | 73.70  | 73.30  |
|                      | 1999      | 68.40                   | 58.50  | 56.50  | 56.40  | 1/     | 55.20  | 49.70  | 51.40  | 1/     | 55.20  | 52.90  | 58.20  |
|                      | 2000      | 1/                      | 57.90  | 1/     | 1/     | 58.70  | 1/     | 1/     | 1/     | 66.10  | 64.90  | 69.00  | 68.20  |
|                      | 2001      | 57.80                   | 57.40  | 1/     | 39.60  | 39.70  | 36.50  | 37.10  | 1/     | 47.90  | 1/     | 35.10  | 53.30  |
|                      | 2002      | 39.40                   | 1/     | 1/     | 1/     | 1/     | 1/     | 1/     | 1/     | 1/     | 51.90  | 54.50  | 55.50  |
| Cottonseed           |           | <i>Dollars Per Ton</i>  |        |        |        |        |        |        |        |        |        |        |        |
|                      | 1993      | ---                     | ---    | ---    | ---    | ---    | ---    | ---    | ---    | ---    | 125.00 | 139.00 | 136.00 |
|                      | 1994      | 140.00                  | ---    | ---    | ---    | ---    | ---    | ---    | ---    | ---    | ---    | 141.00 | 147.00 |
|                      | 1995      | 157.00                  | ---    | ---    | ---    | ---    | ---    | ---    | ---    | ---    | ---    | 132.00 | 131.00 |
|                      | 1996      | ---                     | ---    | ---    | ---    | ---    | ---    | ---    | ---    | ---    | 175.00 | ---    | 174.00 |
|                      | 1997      | 189.00                  | ---    | ---    | ---    | ---    | ---    | ---    | ---    | ---    | 171.00 | 175.00 | 177.00 |
|                      | 1998      | ---                     | ---    | ---    | ---    | ---    | ---    | ---    | ---    | ---    | 135.00 | 175.00 | 179.00 |
|                      | 1999      | 180.00                  | 199.00 | ---    | ---    | ---    | ---    | ---    | ---    | ---    | 149.00 | 141.00 | 135.00 |
|                      | 2000      | 116.00                  | 137.00 | ---    | ---    | ---    | ---    | ---    | ---    | ---    | 145.00 | 140.00 | 134.00 |
|                      | 2001      | 136.00                  | 143.00 | ---    | ---    | ---    | ---    | ---    | ---    | ---    | 146.00 | 141.00 | 145.00 |
|                      | 2002      | 132.00                  | 137.00 | ---    | ---    | ---    | ---    | ---    | ---    | ---    | 150.00 | 142.00 | 132.00 |
| Hay, Alfalfa (Baled) |           | <i>Dollars Per Ton</i>  |        |        |        |        |        |        |        |        |        |        |        |
|                      | 1993      | 86.00                   | 91.00  | 92.00  | 97.00  | 107.00 | 100.00 | 91.00  | 94.00  | 103.00 | 107.00 | 112.00 | 116.00 |
|                      | 1994      | 119.00                  | 126.00 | 123.00 | 124.00 | 111.00 | 116.00 | 108.00 | 106.00 | 114.00 | 116.00 | 120.00 | 131.00 |
|                      | 1995      | 124.00                  | 113.00 | 110.00 | 100.00 | 100.00 | 103.00 | 99.00  | 97.00  | 99.00  | 105.00 | 98.00  | 115.00 |
|                      | 1996      | 100.00                  | 104.00 | 98.00  | 108.00 | 104.00 | 104.00 | 100.00 | 101.00 | 106.00 | 111.00 | 112.00 | 118.00 |
|                      | 1997      | 126.00                  | 133.00 | 127.00 | 132.00 | 131.00 | 125.00 | 117.00 | 113.00 | 113.00 | 121.00 | 125.00 | 119.00 |
|                      | 1998      | 120.00                  | 121.00 | 115.00 | 130.00 | 107.00 | 102.00 | 99.00  | 99.00  | 93.00  | 96.00  | 89.00  | 79.00  |
|                      | 1999      | 79.00                   | 102.00 | 109.00 | 101.00 | 104.00 | 97.00  | 87.00  | 81.00  | 78.00  | 85.00  | 85.00  | 86.00  |
|                      | 2000      | 85.00                   | 94.00  | 99.00  | 96.00  | 91.00  | 81.00  | 76.00  | 81.00  | 89.00  | 97.00  | 97.00  | 97.00  |
|                      | 2001      | 102.00                  | 103.00 | 111.00 | 130.00 | 121.00 | 114.00 | 111.00 | 113.00 | 125.00 | 123.00 | 128.00 | 124.00 |
|                      | 2002      | 113.00                  | 122.00 | 126.00 | 121.00 | 116.00 | 101.00 | 95.00  | 90.00  | 92.00  | 98.00  | 101.00 | 95.00  |



**Field Crop Monthly Average Prices Received, 1993-2002**

| Crop             | Crop Year | Jan.                    | Feb.   | Mar.   | Apr.   | May    | June   | July   | Aug.   | Sept.  | Oct.   | Nov.   | Dec.   |
|------------------|-----------|-------------------------|--------|--------|--------|--------|--------|--------|--------|--------|--------|--------|--------|
| Hay, All (Baled) |           | <i>Dollars Per Ton</i>  |        |        |        |        |        |        |        |        |        |        |        |
|                  | 1993      | 81.00                   | 85.00  | 89.00  | 96.00  | 104.00 | 97.00  | 89.00  | 92.00  | 101.00 | 104.00 | 108.00 | 110.00 |
|                  | 1994      | 116.00                  | 123.00 | 120.00 | 122.00 | 107.00 | 111.00 | 104.00 | 99.00  | 109.00 | 112.00 | 116.00 | 124.00 |
|                  | 1995      | 114.00                  | 110.00 | 109.00 | 100.00 | 97.00  | 99.00  | 96.00  | 94.00  | 98.00  | 104.00 | 96.00  | 106.00 |
|                  | 1996      | 103.00                  | 96.00  | 105.00 | 99.00  | 102.00 | 103.00 | 98.00  | 100.00 | 104.00 | 110.00 | 110.00 | 117.00 |
|                  | 1997      | 124.00                  | 132.00 | 126.00 | 128.00 | 128.00 | 122.00 | 115.00 | 111.00 | 113.00 | 110.00 | 123.00 | 118.00 |
|                  | 1998      | 118.00                  | 120.00 | 113.00 | 129.00 | 103.00 | 100.00 | 99.00  | 97.00  | 91.00  | 92.00  | 86.00  | 79.00  |
|                  | 1999      | 76.00                   | 100.00 | 103.00 | 98.00  | 103.00 | 96.00  | 85.00  | 82.00  | 78.00  | 84.00  | 82.00  | 83.00  |
|                  | 2000      | 83.00                   | 88.00  | 98.00  | 96.00  | 90.00  | 81.00  | 77.00  | 81.00  | 87.00  | 93.00  | 95.00  | 94.00  |
|                  | 2001      | 100.00                  | 100.00 | 110.00 | 128.00 | 116.00 | 112.00 | 108.00 | 110.00 | 121.00 | 117.00 | 117.00 | 115.00 |
|                  | 2002      | 111.00                  | 119.00 | 123.00 | 119.00 | 115.00 | 98.00  | 92.00  | 88.00  | 89.00  | 94.00  | 95.00  | 94.00  |
| Potatoes         |           | <i>Dollars Per Cwt.</i> |        |        |        |        |        |        |        |        |        |        |        |
|                  | 1993      | 10.90                   | 10.90  | 9.20   | 13.60  | 11.80  | 11.10  | 14.70  | 15.10  | 11.00  | 8.50   | 13.30  | 13.90  |
|                  | 1994      | 13.70                   | 11.60  | 11.60  | 10.70  | 11.70  | 11.00  | 12.10  | 11.50  | 6.75   | 6.55   | 8.45   | 8.40   |
|                  | 1995      | 8.50                    | 9.80   | 9.15   | 8.55   | 12.10  | 12.10  | 14.30  | 16.80  | 19.30  | 13.40  | 13.50  | 12.50  |
|                  | 1996      | 12.20                   | 12.00  | 14.00  | 13.90  | 11.20  | 13.10  | 13.10  | 11.00  | 14.90  | 11.20  | 9.80   | 7.95   |
|                  | 1997      | 8.50                    | 8.70   | 9.95   | 11.50  | 8.15   | 9.95   | 10.20  | 13.50  | 14.70  | 13.80  | 8.20   | 11.20  |
|                  | 1998      | 11.00                   | 12.30  | 17.10  | 15.30  | 11.00  | 10.20  | 9.90   | 10.90  | 12.00  | 10.70  | 11.50  | 14.20  |
|                  | 1999      | 16.70                   | 16.40  | 12.90  | 20.40  | 8.65   | 11.50  | 11.30  | 12.30  | 16.50  | 7.95   | 12.20  | 10.90  |
|                  | 2000      | 13.00                   | 12.50  | 13.20  | 14.20  | 10.80  | 11.20  | 14.60  | 17.40  | 16.80  | 8.00   | 8.05   | 11.50  |
|                  | 2001      | 15.80                   | 16.00  | 7.35   | 6.85   | 12.10  | 11.10  | 12.60  | 15.70  | 14.80  | 11.00  | 13.20  | 17.10  |
|                  | 2002      | 17.70                   | 19.00  | 15.70  | 25.60  | 24.10  | 18.40  | 18.60  | 17.70  | 19.20  | 9.40   | 15.20  | 20.10  |
| Wheat, All       |           | <i>Dollars Per Ton</i>  |        |        |        |        |        |        |        |        |        |        |        |
|                  | 1993      | 118.00                  | 124.00 | 111.00 | 107.00 | 106.00 | 106.00 | 100.00 | 105.00 | 100.00 | 99.40  | 113.40 | 119.00 |
|                  | 1994      | 125.00                  | 115.00 | 115.00 | 115.00 | 124.00 | 126.00 | 113.00 | 115.00 | 125.00 | 135.00 | 135.00 | 133.00 |
|                  | 1995      | 144.00                  | 128.00 | 140.00 | 125.00 | 142.00 | 151.00 | 135.00 | 1/     | 1/     | 150.00 | 177.00 | 154.00 |
|                  | 1996      | 167.00                  | 175.00 | 188.00 | 188.00 | 185.00 | 179.00 | 160.00 | 160.00 | 159.00 | 147.00 | 144.00 | 140.00 |
|                  | 1997      | 161.00                  | 146.00 | 151.00 | 145.00 | 140.00 | 134.00 | 1/     | 1/     | 124.00 | 131.00 | 1/     | 1/     |
|                  | 1998      | 1/                      | 1/     | 104.00 | 104.00 | 124.00 | 99.60  | 1/     | 1/     | 1/     | 1/     | 1/     | 1/     |
|                  | 1999      | 96.70                   | 100.00 | 98.70  | 104.00 | 93.00  | 1/     | 1/     | 1/     | 106.00 | 1/     | 1/     | 1/     |
|                  | 2000      | 1/                      | 85.00  | 86.70  | 1/     | 1/     | 1/     | 1/     | 1/     | 1/     | 1/     | 1/     | 1/     |
|                  | 2001      | 1/                      | 1/     | 1/     | 1/     | 111.00 | 114.00 | 1/     | 1/     | 1/     | 1/     | 1/     | 1/     |
|                  | 2002      | 1/                      | 1/     | 1/     | 1/     | 1/     | 118.00 | 1/     | 1/     | 1/     | 1/     | 1/     | 1/     |

1/ Not published due to insufficient sales or disclosure.

**CALIFORNIA BARLEY: Acreage, Yield and Production by County, 2001-2002**

| County                   | 2001           |                |             |                | 2002           |               |             |                |
|--------------------------|----------------|----------------|-------------|----------------|----------------|---------------|-------------|----------------|
|                          | Planted        | Harvested      | Yield/Acre  | Production     | Planted        | Harvested     | Yield/Acre  | Production     |
|                          | <i>Acres</i>   |                | <i>Tons</i> |                | <i>Acres</i>   |               | <i>Tons</i> |                |
| Del Norte                | ---            | ---            | ---         | ---            | ---            | ---           | ---         | ---            |
| Humboldt                 | ---            | ---            | ---         | ---            | ---            | ---           | ---         | ---            |
| Mendocino                | ---            | ---            | ---         | ---            | ---            | ---           | ---         | ---            |
| Other Counties 1/        | 1,100          | 900            | 1.04        | 936            | ---            | ---           | ---         | ---            |
| <b>District 10 Total</b> | <b>1,100</b>   | <b>900</b>     | <b>1.04</b> | <b>936</b>     | ---            | ---           | ---         | ---            |
| Shasta                   | ---            | ---            | ---         | ---            | ---            | ---           | ---         | ---            |
| Siskiyou                 | 13,300         | 10,200         | 1.54        | 15,720         | 12,100         | 7,000         | 2.07        | 14,520         |
| Trinity                  | ---            | ---            | ---         | ---            | ---            | ---           | ---         | ---            |
| Other Counties 1/        | 700            | 300            | 1.28        | 384            | 400            | 200           | 1.92        | 384            |
| <b>District 20 Total</b> | <b>14,000</b>  | <b>10,500</b>  | <b>1.53</b> | <b>16,104</b>  | <b>12,500</b>  | <b>7,200</b>  | <b>2.07</b> | <b>14,904</b>  |
| Lassen                   | ---            | ---            | ---         | ---            | ---            | ---           | ---         | ---            |
| Modoc                    | 16,200         | 13,600         | 1.91        | 25,992         | 12,500         | 9,600         | 2.16        | 20,760         |
| Plumas                   | ---            | ---            | ---         | ---            | ---            | ---           | ---         | ---            |
| Other Counties 1/        | 600            | 200            | 1.80        | 360            | 500            | ---           | ---         | ---            |
| <b>District 30 Total</b> | <b>16,800</b>  | <b>13,800</b>  | <b>1.91</b> | <b>26,352</b>  | <b>13,000</b>  | <b>9,600</b>  | <b>2.16</b> | <b>20,760</b>  |
| Alameda                  | 1,700          | 700            | 0.99        | 696            | ---            | ---           | ---         | ---            |
| Contra Costa             | ---            | ---            | ---         | ---            | ---            | ---           | ---         | ---            |
| Lake                     | ---            | ---            | ---         | ---            | ---            | ---           | ---         | ---            |
| Marin                    | ---            | ---            | ---         | ---            | ---            | ---           | ---         | ---            |
| Monterey                 | 11,600         | 7,200          | 0.84        | 6,048          | 11,000         | 4,000         | 1.01        | 4,056          |
| Napa                     | ---            | ---            | ---         | ---            | ---            | ---           | ---         | ---            |
| San Benito               | 1,900          | 800            | 0.90        | 720            | 1,900          | 900           | 0.96        | 864            |
| San Francisco            | ---            | ---            | ---         | ---            | ---            | ---           | ---         | ---            |
| San Luis Obispo          | 36,100         | 25,000         | 0.74        | 18,480         | 24,000         | 15,600        | 1.11        | 17,256         |
| San Mateo                | ---            | ---            | ---         | ---            | ---            | ---           | ---         | ---            |
| Santa Clara              | ---            | ---            | ---         | ---            | ---            | ---           | ---         | ---            |
| Santa Cruz               | ---            | ---            | ---         | ---            | ---            | ---           | ---         | ---            |
| Sonoma                   | ---            | ---            | ---         | ---            | ---            | ---           | ---         | ---            |
| Other Counties 1/        | 200            | 100            | 0.96        | 96             | 1,600          | 200           | 1.08        | 216            |
| <b>District 40 Total</b> | <b>51,500</b>  | <b>33,800</b>  | <b>0.77</b> | <b>26,040</b>  | <b>38,500</b>  | <b>20,700</b> | <b>1.08</b> | <b>22,392</b>  |
| Butte                    | ---            | ---            | ---         | ---            | 500            | 400           | 1.38        | 552            |
| Colusa                   | ---            | ---            | ---         | ---            | ---            | ---           | ---         | ---            |
| Glenn                    | ---            | ---            | ---         | ---            | 3,400          | 2,800         | 1.67        | 4,680          |
| Sacramento               | 1,000          | 700            | 1.03        | 720            | 500            | 200           | 1.92        | 384            |
| Solano                   | 5,600          | 4,200          | 1.63        | 6,864          | 6,000          | 4,700         | 1.47        | 6,888          |
| Sutter                   | ---            | ---            | ---         | ---            | 400            | 200           | 1.44        | 288            |
| Tehama                   | 1,500          | 1,100          | 0.85        | 936            | 600            | 400           | 1.56        | 624            |
| Yolo                     | 2,000          | 1,400          | 1.44        | 2,016          | 2,300          | 1,700         | 1.77        | 3,000          |
| Yuba                     | ---            | ---            | ---         | ---            | ---            | ---           | ---         | ---            |
| Other Counties 1/        | 1,800          | 1,300          | 1.16        | 1,512          | 300            | 200           | 1.56        | 312            |
| <b>District 50 Total</b> | <b>11,900</b>  | <b>8,700</b>   | <b>1.39</b> | <b>12,048</b>  | <b>14,000</b>  | <b>10,600</b> | <b>1.58</b> | <b>16,728</b>  |
| Fresno                   | 10,200         | 7,300          | 1.65        | 12,072         | 14,800         | 8,600         | 1.75        | 15,048         |
| Kern                     | 24,100         | 18,000         | 1.31        | 23,616         | 17,300         | 9,100         | 1.80        | 16,416         |
| Kings                    | 5,600          | 3,200          | 1.43        | 4,560          | 4,100          | 1,900         | 1.60        | 3,048          |
| Madera                   | 2,000          | 1,400          | 1.44        | 2,016          | ---            | ---           | ---         | ---            |
| Merced                   | 6,100          | 3,200          | 1.49        | 4,752          | 3,600          | 1,700         | 2.29        | 3,888          |
| San Joaquin              | ---            | ---            | ---         | ---            | ---            | ---           | ---         | ---            |
| Stanislaus               | ---            | ---            | ---         | ---            | ---            | ---           | ---         | ---            |
| Tulare                   | 4,100          | 3,100          | 1.45        | 4,488          | 2,000          | 600           | 1.68        | 1,008          |
| Other Counties 1/        | 3,200          | 1,800          | 1.43        | 2,568          | 4,200          | 2,100         | 1.98        | 4,152          |
| <b>District 51 Total</b> | <b>55,300</b>  | <b>38,000</b>  | <b>1.42</b> | <b>54,072</b>  | <b>46,000</b>  | <b>24,000</b> | <b>1.82</b> | <b>43,560</b>  |
| Alpine                   | ---            | ---            | ---         | ---            | ---            | ---           | ---         | ---            |
| Amador                   | ---            | ---            | ---         | ---            | ---            | ---           | ---         | ---            |
| Calaveras                | ---            | ---            | ---         | ---            | ---            | ---           | ---         | ---            |
| El Dorado                | ---            | ---            | ---         | ---            | ---            | ---           | ---         | ---            |
| Inyo                     | ---            | ---            | ---         | ---            | ---            | ---           | ---         | ---            |
| Mariposa                 | ---            | ---            | ---         | ---            | ---            | ---           | ---         | ---            |
| Mono                     | ---            | ---            | ---         | ---            | ---            | ---           | ---         | ---            |
| Nevada                   | ---            | ---            | ---         | ---            | ---            | ---           | ---         | ---            |
| Placer                   | ---            | ---            | ---         | ---            | ---            | ---           | ---         | ---            |
| Sierra                   | ---            | ---            | ---         | ---            | ---            | ---           | ---         | ---            |
| Tuolumne                 | ---            | ---            | ---         | ---            | ---            | ---           | ---         | ---            |
| Other Counties 1/        | 200            | 100            | 0.96        | 96             | ---            | ---           | ---         | ---            |
| <b>District 60 Total</b> | <b>200</b>     | <b>100</b>     | <b>0.96</b> | <b>96</b>      | ---            | ---           | ---         | ---            |
| Imperial                 | ---            | ---            | ---         | ---            | 300            | 200           | 1.44        | 288            |
| Los Angeles              | 4,200          | 1,800          | 0.84        | 1,512          | 1,300          | 500           | 1.25        | 624            |
| Orange                   | ---            | ---            | ---         | ---            | ---            | ---           | ---         | ---            |
| Riverside                | 4,400          | 2,200          | 1.15        | 2,520          | 3,000          | 1,800         | 1.41        | 2,544          |
| San Bernardino           | ---            | ---            | ---         | ---            | ---            | ---           | ---         | ---            |
| San Diego                | ---            | ---            | ---         | ---            | ---            | ---           | ---         | ---            |
| Santa Barbara            | ---            | ---            | ---         | ---            | 400            | 200           | 1.44        | 288            |
| Ventura                  | ---            | ---            | ---         | ---            | ---            | ---           | ---         | ---            |
| Other Counties 1/        | 600            | 200            | 1.20        | 240            | 1,000          | 200           | 1.56        | 312            |
| <b>District 80 Total</b> | <b>9,200</b>   | <b>4,200</b>   | <b>1.02</b> | <b>4,272</b>   | <b>6,000</b>   | <b>2,900</b>  | <b>1.40</b> | <b>4,056</b>   |
| <b>STATE</b>             | <b>160,000</b> | <b>110,000</b> | <b>1.27</b> | <b>139,920</b> | <b>130,000</b> | <b>75,000</b> | <b>1.63</b> | <b>122,400</b> |

1/ Includes one or more counties within a district that normally have less than 200 acres planted.

**CALIFORNIA DRY EDIBLE BEANS: Acreage, Yield And Production By County, 2001-2002**

| County                   | 2001          |               |               |                  | 2002          |               |               |                  |
|--------------------------|---------------|---------------|---------------|------------------|---------------|---------------|---------------|------------------|
|                          | Planted       | Harvested     | Yield/Acre    | Production       | Planted       | Harvested     | Yield/Acre    | Production       |
|                          | <i>Acres</i>  |               | <i>Pounds</i> | <i>Cwt.</i>      | <i>Acres</i>  |               | <i>Pounds</i> | <i>Cwt.</i>      |
| Del Norte                | ---           | ---           | ---           | ---              | ---           | ---           | ---           | ---              |
| Humboldt                 | ---           | ---           | ---           | ---              | ---           | ---           | ---           | ---              |
| Mendocino                | 200           | 200           | 1,500         | 3,000            | ---           | ---           | ---           | ---              |
| <b>District 10 Total</b> | <b>200</b>    | <b>200</b>    | <b>1,500</b>  | <b>3,000</b>     | ---           | ---           | ---           | ---              |
| Shasta                   | 200           | 200           | 1,500         | 3,000            | ---           | ---           | ---           | ---              |
| Siskiyou                 | ---           | ---           | ---           | ---              | ---           | ---           | ---           | ---              |
| Trinity                  | ---           | ---           | ---           | ---              | ---           | ---           | ---           | ---              |
| <b>District 20 Total</b> | <b>200</b>    | <b>200</b>    | <b>1,500</b>  | <b>3,000</b>     | ---           | ---           | ---           | ---              |
| Lassen                   | ---           | ---           | ---           | ---              | ---           | ---           | ---           | ---              |
| Modoc                    | ---           | ---           | ---           | ---              | ---           | ---           | ---           | ---              |
| Plumas                   | ---           | ---           | ---           | ---              | ---           | ---           | ---           | ---              |
| <b>District 30 Total</b> | ---           | ---           | ---           | ---              | ---           | ---           | ---           | ---              |
| Alameda                  | 200           | 200           | 1,000         | 2,000            | ---           | ---           | ---           | ---              |
| Contra Costa             | ---           | ---           | ---           | ---              | ---           | ---           | ---           | ---              |
| Lake                     | ---           | ---           | ---           | ---              | ---           | ---           | ---           | ---              |
| Marin                    | ---           | ---           | ---           | ---              | ---           | ---           | ---           | ---              |
| Monterey                 | 1,300         | 1,300         | 2,231         | 29,000           | 1,200         | 1,100         | 2,909         | 32,000           |
| Napa                     | ---           | ---           | ---           | ---              | ---           | ---           | ---           | ---              |
| San Benito               | ---           | ---           | ---           | ---              | ---           | ---           | ---           | ---              |
| San Francisco            | ---           | ---           | ---           | ---              | ---           | ---           | ---           | ---              |
| San Luis Obispo          | 300           | 300           | 1,000         | 3,000            | 400           | 400           | 1,250         | 5,000            |
| San Mateo                | 200           | 200           | 1,500         | 3,000            | 200           | 200           | 1,500         | 3,000            |
| Santa Clara              | ---           | ---           | ---           | ---              | ---           | ---           | ---           | ---              |
| Santa Cruz               | ---           | ---           | ---           | ---              | ---           | ---           | ---           | ---              |
| Sonoma                   | ---           | ---           | ---           | ---              | ---           | ---           | ---           | ---              |
| Other Counties 1/        | ---           | ---           | ---           | ---              | 100           | 100           | 1,000         | 1,000            |
| <b>District 40 Total</b> | <b>2,000</b>  | <b>2,000</b>  | <b>1,850</b>  | <b>37,000</b>    | <b>1,900</b>  | <b>1,800</b>  | <b>2,278</b>  | <b>41,000</b>    |
| Butte                    | 800           | 800           | 1,875         | 15,000           | 700           | 700           | 2,286         | 16,000           |
| Colusa                   | 7,500         | 7,400         | 1,689         | 125,000          | 8,500         | 8,100         | 1,790         | 145,000          |
| Glenn                    | 2,900         | 2,900         | 1,759         | 51,000           | 4,800         | 4,600         | 1,826         | 84,000           |
| Sacramento               | 1,300         | 1,300         | 1,538         | 20,000           | 600           | 600           | 1,833         | 11,000           |
| Solano                   | 3,400         | 3,300         | 1,788         | 59,000           | 4,600         | 4,500         | 1,822         | 82,000           |
| Sutter                   | 7,600         | 7,400         | 1,743         | 129,000          | 10,200        | 9,800         | 1,755         | 172,000          |
| Tehama                   | 800           | 800           | 1,750         | 14,000           | 700           | 700           | 1,857         | 13,000           |
| Yolo                     | 900           | 900           | 1,778         | 16,000           | 3,100         | 3,000         | 1,833         | 55,000           |
| Yuba                     | ---           | ---           | ---           | ---              | ---           | ---           | ---           | ---              |
| <b>District 50 Total</b> | <b>25,200</b> | <b>24,800</b> | <b>1,730</b>  | <b>429,000</b>   | <b>33,200</b> | <b>32,000</b> | <b>1,806</b>  | <b>578,000</b>   |
| Fresno                   | 14,100        | 13,500        | 1,793         | 242,000          | 10,800        | 10,400        | 2,125         | 221,000          |
| Kern                     | 1,800         | 1,700         | 1,471         | 25,000           | 2,900         | 2,800         | 2,357         | 66,000           |
| Kings                    | 15,800        | 14,900        | 1,302         | 194,000          | 10,400        | 10,100        | 1,436         | 145,000          |
| Madera                   | 300           | 300           | 2,333         | 7,000            | 900           | 900           | 2,667         | 24,000           |
| Merced                   | 4,200         | 4,000         | 1,725         | 69,000           | 4,300         | 4,200         | 1,738         | 73,000           |
| San Joaquin              | 11,000        | 10,600        | 2,208         | 234,000          | 14,900        | 14,500        | 2,290         | 332,000          |
| Stanislaus               | 8,400         | 8,100         | 2,432         | 197,000          | 6,100         | 5,900         | 2,627         | 155,000          |
| Tulare                   | 2,900         | 2,900         | 2,655         | 77,000           | 2,000         | 1,900         | 2,947         | 56,000           |
| Other Counties 1/        | ---           | ---           | ---           | ---              | 400           | 400           | 1,250         | 5,000            |
| <b>District 51 Total</b> | <b>58,500</b> | <b>56,000</b> | <b>1,866</b>  | <b>1,045,000</b> | <b>52,700</b> | <b>51,100</b> | <b>2,108</b>  | <b>1,077,000</b> |
| Alpine                   | ---           | ---           | ---           | ---              | ---           | ---           | ---           | ---              |
| Amador                   | ---           | ---           | ---           | ---              | ---           | ---           | ---           | ---              |
| Calaveras                | ---           | ---           | ---           | ---              | ---           | ---           | ---           | ---              |
| El Dorado                | ---           | ---           | ---           | ---              | ---           | ---           | ---           | ---              |
| Inyo                     | ---           | ---           | ---           | ---              | ---           | ---           | ---           | ---              |
| Mariposa                 | ---           | ---           | ---           | ---              | ---           | ---           | ---           | ---              |
| Mono                     | ---           | ---           | ---           | ---              | ---           | ---           | ---           | ---              |
| Nevada                   | ---           | ---           | ---           | ---              | ---           | ---           | ---           | ---              |
| Placer                   | ---           | ---           | ---           | ---              | ---           | ---           | ---           | ---              |
| Sierra                   | ---           | ---           | ---           | ---              | ---           | ---           | ---           | ---              |
| Tuolumne                 | ---           | ---           | ---           | ---              | ---           | ---           | ---           | ---              |
| <b>District 60 Total</b> | ---           | ---           | ---           | ---              | ---           | ---           | ---           | ---              |
| Imperial                 | ---           | ---           | ---           | ---              | ---           | ---           | ---           | ---              |
| Los Angeles              | ---           | ---           | ---           | ---              | ---           | ---           | ---           | ---              |
| Orange                   | 1,500         | 1,400         | 1,500         | 21,000           | 1,000         | 1,000         | 1,700         | 17,000           |
| Riverside                | 900           | 900           | 1,444         | 13,000           | 400           | 400           | 1,500         | 6,000            |
| San Bernardino           | ---           | ---           | ---           | ---              | ---           | ---           | ---           | ---              |
| San Diego                | ---           | ---           | ---           | ---              | ---           | ---           | ---           | ---              |
| Santa Barbara            | 3,100         | 3,100         | 1,484         | 46,000           | 2,400         | 2,300         | 1,565         | 36,000           |
| Ventura                  | ---           | ---           | ---           | ---              | ---           | ---           | ---           | ---              |
| Other Counties 1/        | 400           | 400           | 1,250         | 5,000            | 200           | 200           | 1,500         | 3,000            |
| <b>District 80 Total</b> | <b>5,900</b>  | <b>5,800</b>  | <b>1,466</b>  | <b>85,000</b>    | <b>4,000</b>  | <b>3,900</b>  | <b>1,590</b>  | <b>62,000</b>    |
| Other Districts 2/       | ---           | ---           | ---           | ---              | 200           | 200           | 2,000         | 4,000            |
| <b>STATE</b>             | <b>92,000</b> | <b>89,000</b> | <b>1,800</b>  | <b>1,602,000</b> | <b>92,000</b> | <b>89,000</b> | <b>1,980</b>  | <b>1,762,000</b> |

1/ Includes one or more counties within a district that normally have less than 200 acres planted.

2/ Includes counties from one or more districts that normally have less than 200 acres planted.

**CALIFORNIA CORN FOR GRAIN: Acreage, Yield And Production By County, 2001-2002**

| County                   | 2001           |                |             |                | 2002           |                |             |                |
|--------------------------|----------------|----------------|-------------|----------------|----------------|----------------|-------------|----------------|
|                          | Planted 1/     | Harvested      | Yield/Acre  | Production     | Planted 1/     | Harvested      | Yield/Acre  | Production     |
|                          | <i>Acres</i>   |                | <i>Tons</i> |                | <i>Acres</i>   |                | <i>Tons</i> |                |
| Del Norte                | ---            | ---            | ---         | ---            | ---            | ---            | ---         | ---            |
| Humboldt                 | ---            | ---            | ---         | ---            | 700            | 200            | 4.48        | 896            |
| Mendocino                | ---            | ---            | ---         | ---            | ---            | ---            | ---         | ---            |
| <b>District 10 Total</b> | ---            | ---            | ---         | ---            | <b>700</b>     | <b>200</b>     | <b>4.48</b> | <b>896</b>     |
| Shasta                   | 200            | ---            | ---         | ---            | ---            | ---            | ---         | ---            |
| Siskiyou                 | 300            | ---            | ---         | ---            | ---            | ---            | ---         | ---            |
| Trinity                  | ---            | ---            | ---         | ---            | ---            | ---            | ---         | ---            |
| Other Counties 2/        | ---            | ---            | ---         | ---            | 200            | ---            | ---         | ---            |
| <b>District 20 Total</b> | <b>500</b>     | ---            | ---         | ---            | <b>200</b>     | ---            | ---         | ---            |
| Lassen                   | ---            | ---            | ---         | ---            | ---            | ---            | ---         | ---            |
| Modoc                    | ---            | ---            | ---         | ---            | ---            | ---            | ---         | ---            |
| Plumas                   | ---            | ---            | ---         | ---            | ---            | ---            | ---         | ---            |
| <b>District 30 Total</b> | ---            | ---            | ---         | ---            | ---            | ---            | ---         | ---            |
| Alameda                  | 400            | 400            | 4.34        | 1,736          | 600            | 500            | 4.48        | 2,240          |
| Contra Costa             | 5,800          | 5,600          | 3.33        | 18,620         | 6,700          | 5,300          | 3.64        | 19,292         |
| Lake                     | ---            | ---            | ---         | ---            | ---            | ---            | ---         | ---            |
| Marin                    | ---            | ---            | ---         | ---            | ---            | ---            | ---         | ---            |
| Monterey                 | ---            | ---            | ---         | ---            | ---            | ---            | ---         | ---            |
| Napa                     | ---            | ---            | ---         | ---            | ---            | ---            | ---         | ---            |
| San Benito               | ---            | ---            | ---         | ---            | ---            | ---            | ---         | ---            |
| San Francisco            | ---            | ---            | ---         | ---            | ---            | ---            | ---         | ---            |
| San Luis Obispo          | 200            | 200            | 3.22        | 644            | 200            | ---            | ---         | ---            |
| San Mateo                | ---            | ---            | ---         | ---            | ---            | ---            | ---         | ---            |
| Santa Clara              | ---            | ---            | ---         | ---            | ---            | ---            | ---         | ---            |
| Santa Cruz               | ---            | ---            | ---         | ---            | ---            | ---            | ---         | ---            |
| Sonoma                   | 300            | ---            | ---         | ---            | 400            | ---            | ---         | ---            |
| Other Counties 2/        | ---            | ---            | ---         | ---            | 100            | 100            | 4.20        | 420            |
| <b>District 40 Total</b> | <b>6,700</b>   | <b>6,200</b>   | <b>3.39</b> | <b>21,000</b>  | <b>8,000</b>   | <b>5,900</b>   | <b>3.72</b> | <b>21,952</b>  |
| Butte                    | 500            | 300            | 3.73        | 1,120          | 600            | 400            | 5.11        | 2,044          |
| Colusa                   | 3,500          | 3,200          | 3.76        | 12,040         | 3,500          | 3,300          | 4.41        | 14,560         |
| Glenn                    | 16,500         | 13,000         | 5.82        | 75,600         | 16,000         | 11,000         | 5.81        | 63,924         |
| Sacramento               | 29,000         | 23,600         | 4.15        | 98,000         | 35,000         | 25,000         | 3.92        | 98,000         |
| Solano                   | 15,000         | 14,000         | 5.30        | 74,200         | 14,400         | 10,900         | 4.88        | 53,200         |
| Sutter                   | 6,000          | 5,500          | 5.09        | 28,000         | 6,500          | 4,300          | 5.05        | 21,728         |
| Tehama                   | 1,000          | 600            | 4.67        | 2,800          | 1,500          | 800            | 4.62        | 3,696          |
| Yolo                     | 17,500         | 17,100         | 5.32        | 91,000         | 17,000         | 16,000         | 5.08        | 81,200         |
| Yuba                     | 1,000          | 700            | 5.20        | 3,640          | 1,500          | 800            | 5.50        | 4,396          |
| <b>District 50 Total</b> | <b>90,000</b>  | <b>78,000</b>  | <b>4.95</b> | <b>386,400</b> | <b>96,000</b>  | <b>72,500</b>  | <b>4.73</b> | <b>342,748</b> |
| Fresno                   | 20,000         | 2,500          | 4.48        | 11,200         | 25,000         | 3,000          | 4.90        | 14,700         |
| Kern                     | 20,000         | 500            | 4.48        | 2,240          | 34,000         | 2,500          | 5.04        | 12,600         |
| Kings                    | 42,500         | 5,500          | 4.99        | 27,440         | 46,000         | 4,400          | 5.85        | 25,760         |
| Madera                   | 17,000         | 3,000          | 4.90        | 14,700         | 19,500         | 3,000          | 4.81        | 14,420         |
| Merced                   | 53,500         | 3,500          | 5.40        | 18,900         | 68,000         | 3,800          | 5.08        | 19,320         |
| San Joaquin              | 79,500         | 49,500         | 4.52        | 224,000        | 81,000         | 50,500         | 4.72        | 238,140        |
| Stanislaus               | 51,000         | 3,000          | 3.73        | 11,200         | 51,500         | 300            | 4.67        | 1,400          |
| Tulare                   | 94,500         | 7,500          | 5.41        | 40,600         | 110,000        | 2,800          | 5.60        | 15,680         |
| <b>District 51 Total</b> | <b>378,000</b> | <b>75,000</b>  | <b>4.67</b> | <b>350,280</b> | <b>435,000</b> | <b>70,300</b>  | <b>4.87</b> | <b>342,020</b> |
| Alpine                   | ---            | ---            | ---         | ---            | ---            | ---            | ---         | ---            |
| Amador                   | 300            | 300            | 4.67        | 1,400          | ---            | ---            | ---         | ---            |
| Calaveras                | ---            | ---            | ---         | ---            | ---            | ---            | ---         | ---            |
| El Dorado                | ---            | ---            | ---         | ---            | ---            | ---            | ---         | ---            |
| Inyo                     | ---            | ---            | ---         | ---            | ---            | ---            | ---         | ---            |
| Mariposa                 | ---            | ---            | ---         | ---            | ---            | ---            | ---         | ---            |
| Mono                     | ---            | ---            | ---         | ---            | ---            | ---            | ---         | ---            |
| Nevada                   | ---            | ---            | ---         | ---            | ---            | ---            | ---         | ---            |
| Placer                   | ---            | ---            | ---         | ---            | ---            | ---            | ---         | ---            |
| Sierra                   | ---            | ---            | ---         | ---            | ---            | ---            | ---         | ---            |
| Tuolumne                 | ---            | ---            | ---         | ---            | ---            | ---            | ---         | ---            |
| <b>District 60 Total</b> | <b>300</b>     | <b>300</b>     | <b>4.67</b> | <b>1,400</b>   | ---            | ---            | ---         | ---            |
| Imperial                 | 1,300          | 500            | 5.04        | 2,520          | 800            | 600            | 5.97        | 3,584          |
| Los Angeles              | ---            | ---            | ---         | ---            | ---            | ---            | ---         | ---            |
| Orange                   | ---            | ---            | ---         | ---            | ---            | ---            | ---         | ---            |
| Riverside                | 1,800          | ---            | ---         | ---            | 1,900          | ---            | ---         | ---            |
| San Bernardino           | 600            | ---            | ---         | ---            | 1,300          | ---            | ---         | ---            |
| San Diego                | ---            | ---            | ---         | ---            | ---            | ---            | ---         | ---            |
| Santa Barbara            | 300            | ---            | ---         | ---            | 500            | ---            | ---         | ---            |
| Ventura                  | ---            | ---            | ---         | ---            | ---            | ---            | ---         | ---            |
| Other Counties 2/        | ---            | ---            | ---         | ---            | 100            | 100            | 5.60        | 560            |
| <b>District 80 Total</b> | <b>4,000</b>   | <b>500</b>     | <b>5.04</b> | <b>2,520</b>   | <b>4,600</b>   | <b>700</b>     | <b>5.92</b> | <b>4,144</b>   |
| Other Districts 3/       | 500            | ---            | ---         | ---            | 500            | 400            | 5.60        | 2,240          |
| <b>STATE</b>             | <b>480,000</b> | <b>160,000</b> | <b>4.76</b> | <b>761,600</b> | <b>545,000</b> | <b>150,000</b> | <b>4.76</b> | <b>714,000</b> |

1/ Includes corn planted for all purposes.

2/ Includes one or more counties within a district that normally have less than 400 acres planted.

3/ Includes counties from one or more districts that normally have less than 400 acres planted .

**CALIFORNIA CORN FOR SILAGE: Acreage, Yield And Production By County, 2001-2002**

| County                   | 2001           |                |              |                  | 2002           |                |              |                   |
|--------------------------|----------------|----------------|--------------|------------------|----------------|----------------|--------------|-------------------|
|                          | Planted 1/     | Harvested      | Yield/Acre   | Production       | Planted 1/     | Harvested      | Yield/Acre   | Production        |
|                          | <i>Acres</i>   |                | <i>Tons</i>  |                  | <i>Acres</i>   |                | <i>Tons</i>  |                   |
| Del Norte                | ---            | ---            | ---          | ---              | ---            | ---            | ---          | ---               |
| Humboldt                 | ---            | ---            | ---          | ---              | 700            | 500            | 24.40        | 12,200            |
| Mendocino                | ---            | ---            | ---          | ---              | ---            | ---            | ---          | ---               |
| <b>District 10 Total</b> | ---            | ---            | ---          | ---              | <b>700</b>     | <b>500</b>     | <b>24.40</b> | <b>12,200</b>     |
| Shasta                   | 200            | 200            | 15.00        | 3,000            | ---            | ---            | ---          | ---               |
| Siskiyou                 | 300            | 300            | 20.00        | 6,000            | ---            | ---            | ---          | ---               |
| Trinity                  | ---            | ---            | ---          | ---              | ---            | ---            | ---          | ---               |
| Other Counties 2/        | ---            | ---            | ---          | ---              | 200            | 200            | 19.00        | 3,800             |
| <b>District 20 Total</b> | <b>500</b>     | <b>500</b>     | <b>18.00</b> | <b>9,000</b>     | <b>200</b>     | <b>200</b>     | <b>19.00</b> | <b>3,800</b>      |
| Lassen                   | ---            | ---            | ---          | ---              | ---            | ---            | ---          | ---               |
| Modoc                    | ---            | ---            | ---          | ---              | ---            | ---            | ---          | ---               |
| Plumas                   | ---            | ---            | ---          | ---              | ---            | ---            | ---          | ---               |
| <b>District 30 Total</b> | ---            | ---            | ---          | ---              | ---            | ---            | ---          | ---               |
| Alameda                  | 400            | ---            | ---          | ---              | 600            | ---            | ---          | ---               |
| Contra Costa             | 5,800          | 200            | 20.00        | 4,000            | 6,700          | 1,000          | 27.00        | 27,000            |
| Lake                     | ---            | ---            | ---          | ---              | ---            | ---            | ---          | ---               |
| Marin                    | ---            | ---            | ---          | ---              | ---            | ---            | ---          | ---               |
| Monterey                 | ---            | ---            | ---          | ---              | ---            | ---            | ---          | ---               |
| Napa                     | ---            | ---            | ---          | ---              | ---            | ---            | ---          | ---               |
| San Benito               | ---            | ---            | ---          | ---              | ---            | ---            | ---          | ---               |
| San Francisco            | ---            | ---            | ---          | ---              | ---            | ---            | ---          | ---               |
| San Luis Obispo          | 200            | ---            | ---          | ---              | 200            | ---            | ---          | ---               |
| San Mateo                | ---            | ---            | ---          | ---              | ---            | ---            | ---          | ---               |
| Santa Clara              | ---            | ---            | ---          | ---              | ---            | ---            | ---          | ---               |
| Santa Cruz               | ---            | ---            | ---          | ---              | ---            | ---            | ---          | ---               |
| Sonoma                   | 300            | 300            | 23.30        | 7,000            | 400            | 400            | 26.50        | 10,600            |
| Other Counties 2/        | ---            | ---            | ---          | ---              | 100            | 300            | 16.30        | 4,900             |
| <b>District 40 Total</b> | <b>6,700</b>   | <b>500</b>     | <b>22.00</b> | <b>11,000</b>    | <b>8,000</b>   | <b>1,700</b>   | <b>25.00</b> | <b>42,500</b>     |
| Butte                    | 500            | 200            | 25.00        | 5,000            | 600            | 200            | 30.00        | 6,000             |
| Colusa                   | 3,500          | 300            | 21.70        | 6,500            | 3,500          | ---            | ---          | ---               |
| Glenn                    | 16,500         | 3,500          | 20.90        | 73,000           | 16,000         | 4,500          | 23.50        | 105,900           |
| Sacramento               | 29,000         | 5,400          | 29.60        | 160,000          | 35,000         | 9,000          | 25.40        | 228,300           |
| Solano                   | 15,000         | 1,000          | 26.00        | 26,000           | 14,400         | 3,200          | 26.90        | 86,000            |
| Sutter                   | 6,000          | 500            | 28.00        | 14,000           | 6,500          | 1,800          | 28.00        | 50,400            |
| Tehama                   | 1,000          | 400            | 27.50        | 11,000           | 1,500          | 700            | 25.30        | 17,700            |
| Yolo                     | 17,500         | 400            | 27.50        | 11,000           | 17,000         | 600            | 31.70        | 19,000            |
| Yuba                     | 1,000          | 300            | 28.30        | 8,500            | 1,500          | 600            | 30.70        | 18,400            |
| Other Counties 2/        | ---            | ---            | ---          | ---              | ---            | 100            | 22.00        | 2,200             |
| <b>District 50 Total</b> | <b>90,000</b>  | <b>12,000</b>  | <b>26.30</b> | <b>315,000</b>   | <b>96,000</b>  | <b>20,700</b>  | <b>25.80</b> | <b>533,900</b>    |
| Fresno                   | 20,000         | 17,500         | 27.70        | 485,000          | 25,000         | 21,900         | 23.60        | 517,500           |
| Kern                     | 20,000         | 19,500         | 23.10        | 450,000          | 34,000         | 31,000         | 24.00        | 744,700           |
| Kings                    | 42,500         | 37,000         | 23.50        | 870,000          | 46,000         | 41,500         | 25.40        | 1,055,000         |
| Madera                   | 17,000         | 14,000         | 28.60        | 400,000          | 19,500         | 16,500         | 25.40        | 418,900           |
| Merced                   | 53,500         | 49,000         | 28.60        | 1,400,000        | 68,000         | 64,000         | 25.70        | 1,645,000         |
| San Joaquin              | 79,500         | 28,000         | 28.90        | 810,000          | 81,000         | 30,000         | 28.50        | 855,300           |
| Stanislaus               | 51,000         | 47,000         | 26.40        | 1,243,000        | 51,500         | 51,000         | 27.60        | 1,410,000         |
| Tulare                   | 94,500         | 86,000         | 24.40        | 2,100,000        | 110,000        | 107,000        | 26.20        | 2,800,000         |
| <b>District 51 Total</b> | <b>378,000</b> | <b>298,000</b> | <b>26.00</b> | <b>7,758,000</b> | <b>435,000</b> | <b>362,900</b> | <b>26.00</b> | <b>9,446,400</b>  |
| Alpine                   | ---            | ---            | ---          | ---              | ---            | ---            | ---          | ---               |
| Amador                   | 300            | ---            | ---          | ---              | ---            | ---            | ---          | ---               |
| Calaveras                | ---            | ---            | ---          | ---              | ---            | ---            | ---          | ---               |
| El Dorado                | ---            | ---            | ---          | ---              | ---            | ---            | ---          | ---               |
| Inyo                     | ---            | ---            | ---          | ---              | ---            | ---            | ---          | ---               |
| Mariposa                 | ---            | ---            | ---          | ---              | ---            | ---            | ---          | ---               |
| Mono                     | ---            | ---            | ---          | ---              | ---            | ---            | ---          | ---               |
| Nevada                   | ---            | ---            | ---          | ---              | ---            | ---            | ---          | ---               |
| Placer                   | ---            | ---            | ---          | ---              | ---            | ---            | ---          | ---               |
| Sierra                   | ---            | ---            | ---          | ---              | ---            | ---            | ---          | ---               |
| Tuolumne                 | ---            | ---            | ---          | ---              | ---            | ---            | ---          | ---               |
| <b>District 60 Total</b> | <b>300</b>     | ---            | ---          | ---              | ---            | ---            | ---          | ---               |
| Imperial                 | 1,300          | 800            | 18.80        | 15,000           | 800            | 200            | 19.00        | 3,800             |
| Los Angeles              | ---            | ---            | ---          | ---              | ---            | ---            | ---          | ---               |
| Orange                   | ---            | ---            | ---          | ---              | ---            | ---            | ---          | ---               |
| Riverside                | 1,800          | 1,800          | 26.70        | 48,000           | 1,900          | 1,900          | 26.50        | 50,300            |
| San Bernardino           | 600            | 600            | 25.00        | 15,000           | 1,300          | 1,300          | 24.50        | 31,900            |
| San Diego                | ---            | ---            | ---          | ---              | ---            | ---            | ---          | ---               |
| Santa Barbara            | 300            | 300            | 23.30        | 7,000            | 500            | 500            | 24.80        | 12,400            |
| Ventura                  | ---            | ---            | ---          | ---              | ---            | ---            | ---          | ---               |
| Other Counties 2/        | ---            | ---            | ---          | ---              | 100            | ---            | ---          | ---               |
| <b>District 80 Total</b> | <b>4,000</b>   | <b>3,500</b>   | <b>24.30</b> | <b>85,000</b>    | <b>4,600</b>   | <b>3,900</b>   | <b>25.20</b> | <b>98,400</b>     |
| Other Districts 3/       | 500            | 500            | 24.00        | 12,000           | 500            | 100            | 28.00        | 2,800             |
| <b>STATE</b>             | <b>480,000</b> | <b>315,000</b> | <b>26.00</b> | <b>8,190,000</b> | <b>545,000</b> | <b>390,000</b> | <b>26.00</b> | <b>10,140,000</b> |

1/ Includes corn planted for all purposes.

2/ Includes one or more counties within a district that normally have less than 200 acres planted.

3/ Includes counties from one or more districts that normally have less than 200 acres planted.

**CALIFORNIA COTTON, AMERICAN PIMA: Acreage, Yield And Production By County, 2001-2002**

| County                   | 2001           |                |               |                | 2002           |                |               |                |
|--------------------------|----------------|----------------|---------------|----------------|----------------|----------------|---------------|----------------|
|                          | Planted        | Harvested      | Yield/Acre    | Production     | Planted        | Harvested      | Yield/Acre    | Production     |
|                          | <i>Acres</i>   |                | <i>Pounds</i> | <i>Bales</i>   | <i>Acres</i>   |                | <i>Pounds</i> | <i>Bales</i>   |
| Del Norte                | ---            | ---            | ---           | ---            | ---            | ---            | ---           | ---            |
| Humboldt                 | ---            | ---            | ---           | ---            | ---            | ---            | ---           | ---            |
| Mendocino                | ---            | ---            | ---           | ---            | ---            | ---            | ---           | ---            |
| <b>District 10 Total</b> | ---            | ---            | ---           | ---            | ---            | ---            | ---           | ---            |
| Shasta                   | ---            | ---            | ---           | ---            | ---            | ---            | ---           | ---            |
| Siskiyou                 | ---            | ---            | ---           | ---            | ---            | ---            | ---           | ---            |
| Trinity                  | ---            | ---            | ---           | ---            | ---            | ---            | ---           | ---            |
| <b>District 20 Total</b> | ---            | ---            | ---           | ---            | ---            | ---            | ---           | ---            |
| Lassen                   | ---            | ---            | ---           | ---            | ---            | ---            | ---           | ---            |
| Modoc                    | ---            | ---            | ---           | ---            | ---            | ---            | ---           | ---            |
| Plumas                   | ---            | ---            | ---           | ---            | ---            | ---            | ---           | ---            |
| <b>District 30 Total</b> | ---            | ---            | ---           | ---            | ---            | ---            | ---           | ---            |
| Alameda                  | ---            | ---            | ---           | ---            | ---            | ---            | ---           | ---            |
| Contra Costa             | ---            | ---            | ---           | ---            | ---            | ---            | ---           | ---            |
| Lake                     | ---            | ---            | ---           | ---            | ---            | ---            | ---           | ---            |
| Marin                    | ---            | ---            | ---           | ---            | ---            | ---            | ---           | ---            |
| Monterey                 | ---            | ---            | ---           | ---            | ---            | ---            | ---           | ---            |
| Napa                     | ---            | ---            | ---           | ---            | ---            | ---            | ---           | ---            |
| San Benito               | ---            | ---            | ---           | ---            | ---            | ---            | ---           | ---            |
| San Francisco            | ---            | ---            | ---           | ---            | ---            | ---            | ---           | ---            |
| San Luis Obispo          | ---            | ---            | ---           | ---            | ---            | ---            | ---           | ---            |
| San Mateo                | ---            | ---            | ---           | ---            | ---            | ---            | ---           | ---            |
| Santa Clara              | ---            | ---            | ---           | ---            | ---            | ---            | ---           | ---            |
| Santa Cruz               | ---            | ---            | ---           | ---            | ---            | ---            | ---           | ---            |
| Sonoma                   | ---            | ---            | ---           | ---            | ---            | ---            | ---           | ---            |
| <b>District 40 Total</b> | ---            | ---            | ---           | ---            | ---            | ---            | ---           | ---            |
| Butte                    | ---            | ---            | ---           | ---            | ---            | ---            | ---           | ---            |
| Colusa                   | ---            | ---            | ---           | ---            | ---            | ---            | ---           | ---            |
| Glenn                    | ---            | ---            | ---           | ---            | ---            | ---            | ---           | ---            |
| Sacramento               | ---            | ---            | ---           | ---            | ---            | ---            | ---           | ---            |
| Solano                   | ---            | ---            | ---           | ---            | ---            | ---            | ---           | ---            |
| Sutter                   | ---            | ---            | ---           | ---            | ---            | ---            | ---           | ---            |
| Tehama                   | ---            | ---            | ---           | ---            | ---            | ---            | ---           | ---            |
| Yolo                     | ---            | ---            | ---           | ---            | ---            | ---            | ---           | ---            |
| Yuba                     | ---            | ---            | ---           | ---            | ---            | ---            | ---           | ---            |
| <b>District 50 Total</b> | ---            | ---            | ---           | ---            | ---            | ---            | ---           | ---            |
| Fresno                   | 105,500        | 105,100        | 1,388         | 303,900        | 75,200         | 74,800         | 1,509         | 235,200        |
| Kern                     | 31,200         | 31,000         | 1,394         | 90,000         | 41,800         | 41,500         | 1,400         | 121,000        |
| Kings                    | 95,300         | 94,900         | 1,128         | 223,000        | 87,300         | 87,000         | 1,277         | 231,400        |
| Madera                   | 400            | 400            | 1,320         | 1,100          | ---            | ---            | ---           | ---            |
| Merced                   | 3,000          | 3,000          | 1,296         | 8,100          | 2,300          | 2,300          | 1,273         | 6,100          |
| San Joaquin              | ---            | ---            | ---           | ---            | ---            | ---            | ---           | ---            |
| Stanislaus               | ---            | ---            | ---           | ---            | ---            | ---            | ---           | ---            |
| Tulare                   | 4,500          | 4,500          | 1,355         | 12,700         | 3,200          | 3,200          | 1,380         | 9,200          |
| Other Counties 1/        | ---            | ---            | ---           | ---            | 100            | 100            | 960           | 200            |
| <b>District 51 Total</b> | <b>239,900</b> | <b>238,900</b> | <b>1,283</b>  | <b>638,800</b> | <b>209,900</b> | <b>208,900</b> | <b>1,386</b>  | <b>603,100</b> |
| Alpine                   | ---            | ---            | ---           | ---            | ---            | ---            | ---           | ---            |
| Amador                   | ---            | ---            | ---           | ---            | ---            | ---            | ---           | ---            |
| Calaveras                | ---            | ---            | ---           | ---            | ---            | ---            | ---           | ---            |
| El Dorado                | ---            | ---            | ---           | ---            | ---            | ---            | ---           | ---            |
| Inyo                     | ---            | ---            | ---           | ---            | ---            | ---            | ---           | ---            |
| Mariposa                 | ---            | ---            | ---           | ---            | ---            | ---            | ---           | ---            |
| Mono                     | ---            | ---            | ---           | ---            | ---            | ---            | ---           | ---            |
| Nevada                   | ---            | ---            | ---           | ---            | ---            | ---            | ---           | ---            |
| Placer                   | ---            | ---            | ---           | ---            | ---            | ---            | ---           | ---            |
| Sierra                   | ---            | ---            | ---           | ---            | ---            | ---            | ---           | ---            |
| Tuolumne                 | ---            | ---            | ---           | ---            | ---            | ---            | ---           | ---            |
| <b>District 60 Total</b> | ---            | ---            | ---           | ---            | ---            | ---            | ---           | ---            |
| Imperial                 | ---            | ---            | ---           | ---            | ---            | ---            | ---           | ---            |
| Los Angeles              | ---            | ---            | ---           | ---            | ---            | ---            | ---           | ---            |
| Orange                   | ---            | ---            | ---           | ---            | ---            | ---            | ---           | ---            |
| Riverside                | ---            | ---            | ---           | ---            | ---            | ---            | ---           | ---            |
| San Bernardino           | ---            | ---            | ---           | ---            | ---            | ---            | ---           | ---            |
| San Diego                | ---            | ---            | ---           | ---            | ---            | ---            | ---           | ---            |
| Santa Barbara            | ---            | ---            | ---           | ---            | ---            | ---            | ---           | ---            |
| Ventura                  | ---            | ---            | ---           | ---            | ---            | ---            | ---           | ---            |
| <b>District 80 Total</b> | ---            | ---            | ---           | ---            | ---            | ---            | ---           | ---            |
| Other Districts 2/       | 100            | 100            | 960           | 200            | 100            | 100            | 960           | 200            |
| <b>STATE</b>             | <b>240,000</b> | <b>239,000</b> | <b>1,283</b>  | <b>639,000</b> | <b>210,000</b> | <b>209,000</b> | <b>1,386</b>  | <b>603,300</b> |

1/ Includes one or more counties within a district that normally have less than 200 acres planted.

2/ Includes counties from one or more districts that normally have less than 200 acres planted.

**CALIFORNIA COTTON, UPLAND: Acreage, Yield And Production By County, 2001-2002**

| County                   | 2001           |                |               |                  | 2002           |                |               |                  |
|--------------------------|----------------|----------------|---------------|------------------|----------------|----------------|---------------|------------------|
|                          | Planted        | Harvested      | Yield/Acre    | Production       | Planted        | Harvested      | Yield/Acre    | Production       |
|                          | <i>Acres</i>   |                | <i>Pounds</i> | <i>Bales</i>     | <i>Acres</i>   |                | <i>Pounds</i> | <i>Bales</i>     |
| Del Norte                | ---            | ---            | ---           | ---              | ---            | ---            | ---           | ---              |
| Humboldt                 | ---            | ---            | ---           | ---              | ---            | ---            | ---           | ---              |
| Mendocino                | ---            | ---            | ---           | ---              | ---            | ---            | ---           | ---              |
| <b>District 10 Total</b> | ---            | ---            | ---           | ---              | ---            | ---            | ---           | ---              |
| Shasta                   | ---            | ---            | ---           | ---              | ---            | ---            | ---           | ---              |
| Siskiyou                 | ---            | ---            | ---           | ---              | ---            | ---            | ---           | ---              |
| Trinity                  | ---            | ---            | ---           | ---              | ---            | ---            | ---           | ---              |
| <b>District 20 Total</b> | ---            | ---            | ---           | ---              | ---            | ---            | ---           | ---              |
| Lassen                   | ---            | ---            | ---           | ---              | ---            | ---            | ---           | ---              |
| Modoc                    | ---            | ---            | ---           | ---              | ---            | ---            | ---           | ---              |
| Plumas                   | ---            | ---            | ---           | ---              | ---            | ---            | ---           | ---              |
| <b>District 30 Total</b> | ---            | ---            | ---           | ---              | ---            | ---            | ---           | ---              |
| Alameda                  | ---            | ---            | ---           | ---              | ---            | ---            | ---           | ---              |
| Contra Costa             | ---            | ---            | ---           | ---              | ---            | ---            | ---           | ---              |
| Lake                     | ---            | ---            | ---           | ---              | ---            | ---            | ---           | ---              |
| Marin                    | ---            | ---            | ---           | ---              | ---            | ---            | ---           | ---              |
| Monterey                 | ---            | ---            | ---           | ---              | ---            | ---            | ---           | ---              |
| Napa                     | ---            | ---            | ---           | ---              | ---            | ---            | ---           | ---              |
| San Benito               | ---            | ---            | ---           | ---              | ---            | ---            | ---           | ---              |
| San Francisco            | ---            | ---            | ---           | ---              | ---            | ---            | ---           | ---              |
| San Luis Obispo          | ---            | ---            | ---           | ---              | ---            | ---            | ---           | ---              |
| San Mateo                | ---            | ---            | ---           | ---              | ---            | ---            | ---           | ---              |
| Santa Clara              | ---            | ---            | ---           | ---              | ---            | ---            | ---           | ---              |
| Santa Cruz               | ---            | ---            | ---           | ---              | ---            | ---            | ---           | ---              |
| Sonoma                   | ---            | ---            | ---           | ---              | ---            | ---            | ---           | ---              |
| <b>District 40 Total</b> | ---            | ---            | ---           | ---              | ---            | ---            | ---           | ---              |
| Butte                    | ---            | ---            | ---           | ---              | ---            | ---            | ---           | ---              |
| Colusa                   | 12,000         | 12,000         | 1,360         | 34,000           | 8,700          | 8,600          | 1,518         | 27,200           |
| Glenn                    | 2,400          | 2,400          | 1,220         | 6,100            | 2,100          | 2,000          | 1,200         | 5,000            |
| Sacramento               | ---            | ---            | ---           | ---              | ---            | ---            | ---           | ---              |
| Solano                   | ---            | ---            | ---           | ---              | ---            | ---            | ---           | ---              |
| Sutter                   | 2,400          | 2,400          | 1,260         | 6,300            | 2,000          | 2,000          | 1,200         | 5,000            |
| Tehama                   | ---            | ---            | ---           | ---              | ---            | ---            | ---           | ---              |
| Yolo                     | 5,500          | 5,500          | 1,248         | 14,300           | 3,400          | 3,400          | 1,073         | 7,600            |
| Yuba                     | ---            | ---            | ---           | ---              | ---            | ---            | ---           | ---              |
| <b>District 50 Total</b> | <b>22,300</b>  | <b>22,300</b>  | <b>1,307</b>  | <b>60,700</b>    | <b>16,200</b>  | <b>16,000</b>  | <b>1,344</b>  | <b>44,800</b>    |
| Fresno                   | 165,500        | 164,500        | 1,415         | 485,000          | 150,000        | 149,300        | 1,491         | 463,800          |
| Kern                     | 125,600        | 124,900        | 1,335         | 347,300          | 84,800         | 84,500         | 1,395         | 245,500          |
| Kings                    | 107,500        | 106,500        | 1,318         | 292,500          | 88,200         | 87,500         | 1,494         | 272,300          |
| Madera                   | 27,000         | 26,900         | 1,310         | 73,400           | 19,500         | 19,400         | 1,475         | 59,600           |
| Merced                   | 66,000         | 65,100         | 1,425         | 193,200          | 50,400         | 50,000         | 1,465         | 152,600          |
| San Joaquin              | ---            | ---            | ---           | ---              | ---            | ---            | ---           | ---              |
| Stanislaus               | ---            | ---            | ---           | ---              | ---            | ---            | ---           | ---              |
| Tulare                   | 80,800         | 80,000         | 1,297         | 216,200          | 48,300         | 48,000         | 1,490         | 149,000          |
| Other Counties 1/        | ---            | ---            | ---           | ---              | 100            | 100            | 960           | 200              |
| <b>District 51 Total</b> | <b>572,400</b> | <b>567,900</b> | <b>1,359</b>  | <b>1,607,600</b> | <b>441,300</b> | <b>438,800</b> | <b>1,469</b>  | <b>1,343,000</b> |
| Alpine                   | ---            | ---            | ---           | ---              | ---            | ---            | ---           | ---              |
| Amador                   | ---            | ---            | ---           | ---              | ---            | ---            | ---           | ---              |
| Calaveras                | ---            | ---            | ---           | ---              | ---            | ---            | ---           | ---              |
| El Dorado                | ---            | ---            | ---           | ---              | ---            | ---            | ---           | ---              |
| Inyo                     | ---            | ---            | ---           | ---              | ---            | ---            | ---           | ---              |
| Mariposa                 | ---            | ---            | ---           | ---              | ---            | ---            | ---           | ---              |
| Mono                     | ---            | ---            | ---           | ---              | ---            | ---            | ---           | ---              |
| Nevada                   | ---            | ---            | ---           | ---              | ---            | ---            | ---           | ---              |
| Placer                   | ---            | ---            | ---           | ---              | ---            | ---            | ---           | ---              |
| Sierra                   | ---            | ---            | ---           | ---              | ---            | ---            | ---           | ---              |
| Tuolumne                 | ---            | ---            | ---           | ---              | ---            | ---            | ---           | ---              |
| <b>District 60 Total</b> | ---            | ---            | ---           | ---              | ---            | ---            | ---           | ---              |
| Imperial                 | 12,800         | 12,500         | 1,440         | 37,500           | 10,200         | 10,000         | 1,555         | 32,400           |
| Los Angeles              | ---            | ---            | ---           | ---              | ---            | ---            | ---           | ---              |
| Orange                   | ---            | ---            | ---           | ---              | ---            | ---            | ---           | ---              |
| Riverside                | 20,600         | 20,400         | 1,395         | 59,300           | 11,400         | 11,300         | 1,572         | 37,000           |
| San Bernardino           | 1,600          | 1,600          | 1,320         | 4,400            | 900            | 900            | 1,493         | 2,800            |
| San Diego                | ---            | ---            | ---           | ---              | ---            | ---            | ---           | ---              |
| Santa Barbara            | ---            | ---            | ---           | ---              | ---            | ---            | ---           | ---              |
| Ventura                  | ---            | ---            | ---           | ---              | ---            | ---            | ---           | ---              |
| <b>District 80 Total</b> | <b>35,000</b>  | <b>34,500</b>  | <b>1,408</b>  | <b>101,200</b>   | <b>22,500</b>  | <b>22,200</b>  | <b>1,561</b>  | <b>72,200</b>    |
| Other Districts 2/       | 300            | 300            | 800           | 500              | ---            | ---            | ---           | ---              |
| <b>STATE</b>             | <b>630,000</b> | <b>625,000</b> | <b>1,359</b>  | <b>1,770,000</b> | <b>480,000</b> | <b>477,000</b> | <b>1,469</b>  | <b>1,460,000</b> |

1/ Includes one or more counties within a district that normally have less than 500 acres planted.

2/ Includes counties from one or more districts that normally have less than 500 acres planted.

**CALIFORNIA OATS: Acreage, Yield And Production By County, 2001-2002**

| County                   | 2001           |               |             |               | 2002           |               |             |               |
|--------------------------|----------------|---------------|-------------|---------------|----------------|---------------|-------------|---------------|
|                          | Planted        | Harvested     | Yield/Acre  | Production    | Planted        | Harvested     | Yield/Acre  | Production    |
|                          | Acres          |               | Tons        |               | Acres          |               | Tons        |               |
| Del Norte                | ---            | ---           | ---         | ---           | ---            | ---           | ---         | ---           |
| Humboldt                 | 400            | ---           | ---         | ---           | ---            | ---           | ---         | ---           |
| Mendocino                | 1,600          | 200           | 1.20        | 240           | ---            | ---           | ---         | ---           |
| Other Counties 1/        | ---            | ---           | ---         | ---           | 3,000          | 200           | 1.12        | 224           |
| <b>District 10 Total</b> | <b>2,000</b>   | <b>200</b>    | <b>1.20</b> | <b>240</b>    | <b>3,000</b>   | <b>200</b>    | <b>1.12</b> | <b>224</b>    |
| Shasta                   | 2,400          | 200           | 1.04        | 208           | 2,100          | 200           | 0.96        | 192           |
| Siskiyou                 | 5,600          | 500           | 1.09        | 544           | 4,900          | 800           | 1.44        | 1,152         |
| Trinity                  | ---            | ---           | ---         | ---           | ---            | ---           | ---         | ---           |
| <b>District 20 Total</b> | <b>8,000</b>   | <b>700</b>    | <b>1.07</b> | <b>752</b>    | <b>7,000</b>   | <b>1,000</b>  | <b>1.34</b> | <b>1,344</b>  |
| Lassen                   | 3,200          | 200           | 1.44        | 288           | 2,600          | 400           | 1.44        | 576           |
| Modoc                    | 5,100          | 300           | 1.17        | 352           | 3,200          | 600           | 1.63        | 976           |
| Plumas                   | 700            | ---           | ---         | ---           | 1,200          | ---           | ---         | ---           |
| <b>District 30 Total</b> | <b>9,000</b>   | <b>500</b>    | <b>1.28</b> | <b>640</b>    | <b>7,000</b>   | <b>1,000</b>  | <b>1.55</b> | <b>1,552</b>  |
| Alameda                  | 1,700          | 200           | 0.80        | 160           | ---            | ---           | ---         | ---           |
| Contra Costa             | 1,200          | 200           | 0.80        | 160           | ---            | ---           | ---         | ---           |
| Lake                     | 1,200          | ---           | ---         | ---           | 1,400          | 300           | 1.39        | 416           |
| Marin                    | 4,000          | ---           | ---         | ---           | 3,200          | ---           | ---         | ---           |
| Monterey                 | 2,500          | 600           | 1.01        | 608           | 2,400          | 300           | 1.97        | 592           |
| Napa                     | 700            | ---           | ---         | ---           | 700            | ---           | ---         | ---           |
| San Benito               | 2,500          | 500           | 0.77        | 384           | 2,100          | 500           | 1.09        | 544           |
| San Francisco            | ---            | ---           | ---         | ---           | ---            | ---           | ---         | ---           |
| San Luis Obispo          | 12,000         | 400           | 0.72        | 288           | 12,600         | 600           | 0.75        | 448           |
| San Mateo                | 1,000          | 200           | 0.56        | 112           | 1,100          | 200           | 0.80        | 160           |
| Santa Clara              | 1,400          | ---           | ---         | ---           | 2,200          | 500           | 0.64        | 320           |
| Santa Cruz               | 800            | ---           | ---         | ---           | 700            | ---           | ---         | ---           |
| Sonoma                   | 22,000         | 1,200         | 0.89        | 1,072         | 19,000         | 1,400         | 0.93        | 1,296         |
| Other Counties 1/        | ---            | ---           | ---         | ---           | 2,600          | 200           | 0.96        | 192           |
| <b>District 40 Total</b> | <b>51,000</b>  | <b>3,300</b>  | <b>0.84</b> | <b>2,784</b>  | <b>48,000</b>  | <b>4,000</b>  | <b>0.99</b> | <b>3,968</b>  |
| Butte                    | 2,400          | 200           | 0.72        | 144           | 1,800          | 300           | 0.91        | 272           |
| Colusa                   | 900            | ---           | ---         | ---           | 700            | 400           | 1.00        | 400           |
| Glenn                    | 5,100          | 200           | 0.96        | 192           | 5,100          | 300           | 1.12        | 336           |
| Sacramento               | 5,200          | ---           | ---         | ---           | ---            | ---           | ---         | ---           |
| Solano                   | 3,500          | 200           | 0.96        | 192           | 3,400          | 800           | 1.42        | 1,136         |
| Sutter                   | 2,700          | 300           | 1.39        | 416           | 3,000          | 900           | 1.16        | 1,040         |
| Tehama                   | 5,300          | 200           | 1.04        | 208           | ---            | ---           | ---         | ---           |
| Yolo                     | 9,200          | 300           | 1.33        | 400           | 9,600          | 400           | 1.36        | 544           |
| Yuba                     | 700            | 200           | 1.04        | 208           | 2,000          | 600           | 1.07        | 640           |
| Other Counties 1/        | ---            | ---           | ---         | ---           | 11,400         | 300           | 1.17        | 352           |
| <b>District 50 Total</b> | <b>35,000</b>  | <b>1,600</b>  | <b>1.10</b> | <b>1,760</b>  | <b>37,000</b>  | <b>4,000</b>  | <b>1.18</b> | <b>4,720</b>  |
| Fresno                   | 10,500         | 400           | 1.16        | 464           | 9,600          | 2,400         | 1.33        | 3,200         |
| Kern                     | 3,200          | 300           | 1.17        | 352           | 2,700          | 600           | 1.55        | 928           |
| Kings                    | 3,500          | ---           | ---         | ---           | 4,700          | 200           | 1.28        | 256           |
| Madera                   | 5,900          | 800           | 1.04        | 832           | 7,500          | 1,300         | 1.28        | 1,664         |
| Merced                   | 30,400         | 1,200         | 0.89        | 1,072         | 35,000         | 1,600         | 1.24        | 1,984         |
| San Joaquin              | 18,000         | 700           | 1.21        | 848           | 16,500         | 2,500         | 1.59        | 3,968         |
| Stanislaus               | 29,000         | 1,900         | 0.96        | 1,824         | 27,000         | 1,400         | 1.36        | 1,904         |
| Tulare                   | 19,500         | 2,000         | 0.91        | 1,824         | 18,000         | 4,500         | 1.43        | 6,448         |
| <b>District 51 Total</b> | <b>120,000</b> | <b>7,300</b>  | <b>0.99</b> | <b>7,216</b>  | <b>121,000</b> | <b>14,500</b> | <b>1.40</b> | <b>20,352</b> |
| Alpine                   | ---            | ---           | ---         | ---           | ---            | ---           | ---         | ---           |
| Amador                   | 2,000          | ---           | ---         | ---           | 1,300          | ---           | ---         | ---           |
| Calaveras                | 2,200          | 300           | 1.17        | 352           | ---            | ---           | ---         | ---           |
| El Dorado                | ---            | ---           | ---         | ---           | ---            | ---           | ---         | ---           |
| Inyo                     | 300            | ---           | ---         | ---           | ---            | ---           | ---         | ---           |
| Mariposa                 | 1,200          | ---           | ---         | ---           | 900            | ---           | ---         | ---           |
| Mono                     | 400            | ---           | ---         | ---           | ---            | ---           | ---         | ---           |
| Nevada                   | 300            | ---           | ---         | ---           | ---            | ---           | ---         | ---           |
| Placer                   | 4,100          | 400           | 0.72        | 288           | 4,400          | 200           | 0.96        | 192           |
| Sierra                   | 1,000          | ---           | ---         | ---           | 1,200          | ---           | ---         | ---           |
| Tuolumne                 | 300            | ---           | ---         | ---           | ---            | ---           | ---         | ---           |
| Other Counties 1/        | 200            | ---           | ---         | ---           | 4,200          | 100           | 1.28        | 128           |
| <b>District 60 Total</b> | <b>12,000</b>  | <b>700</b>    | <b>0.91</b> | <b>640</b>    | <b>12,000</b>  | <b>300</b>    | <b>1.07</b> | <b>320</b>    |
| Imperial                 | 2,600          | 200           | 0.48        | 96            | 4,900          | 800           | 1.02        | 816           |
| Los Angeles              | 700            | ---           | ---         | ---           | 700            | ---           | ---         | ---           |
| Orange                   | ---            | ---           | ---         | ---           | ---            | ---           | ---         | ---           |
| Riverside                | 6,500          | 300           | 0.37        | 112           | 5,500          | 400           | 1.04        | 416           |
| San Bernardino           | 1,500          | ---           | ---         | ---           | 1,700          | ---           | ---         | ---           |
| San Diego                | 5,500          | ---           | ---         | ---           | 5,100          | 500           | 1.06        | 528           |
| Santa Barbara            | 5,100          | 200           | 0.80        | 160           | 5,600          | 300           | 1.07        | 320           |
| Ventura                  | 1,100          | ---           | ---         | ---           | 1,500          | ---           | ---         | ---           |
| <b>District 80 Total</b> | <b>23,000</b>  | <b>700</b>    | <b>0.53</b> | <b>368</b>    | <b>25,000</b>  | <b>2,000</b>  | <b>1.04</b> | <b>2,080</b>  |
| <b>STATE</b>             | <b>260,000</b> | <b>15,000</b> | <b>0.96</b> | <b>14,400</b> | <b>260,000</b> | <b>27,000</b> | <b>1.28</b> | <b>34,560</b> |

1/ Includes one or more counties within a district that normally have less than 200 acres planted.



**CALIFORNIA RICE: Acreage, Yield And Production By County, 2001-2002**

| County                   | 2001           |                |               |                   | 2002           |                |               |                   |
|--------------------------|----------------|----------------|---------------|-------------------|----------------|----------------|---------------|-------------------|
|                          | Planted        | Harvested      | Yield/Acre    | Production        | Planted        | Harvested      | Yield/Acre    | Production        |
|                          | <i>Acres</i>   |                | <i>Pounds</i> | <i>Cwt.</i>       | <i>Acres</i>   |                | <i>Pounds</i> | <i>Cwt.</i>       |
| Del Norte                | ---            | ---            | ---           | ---               | ---            | ---            | ---           | ---               |
| Humboldt                 | ---            | ---            | ---           | ---               | ---            | ---            | ---           | ---               |
| Mendocino                | ---            | ---            | ---           | ---               | ---            | ---            | ---           | ---               |
| <b>District 10 Total</b> | ---            | ---            | ---           | ---               | ---            | ---            | ---           | ---               |
| Shasta                   | ---            | ---            | ---           | ---               | ---            | ---            | ---           | ---               |
| Siskiyou                 | ---            | ---            | ---           | ---               | ---            | ---            | ---           | ---               |
| Trinity                  | ---            | ---            | ---           | ---               | ---            | ---            | ---           | ---               |
| <b>District 20 Total</b> | ---            | ---            | ---           | ---               | ---            | ---            | ---           | ---               |
| Lassen                   | ---            | ---            | ---           | ---               | ---            | ---            | ---           | ---               |
| Modoc                    | ---            | ---            | ---           | ---               | ---            | ---            | ---           | ---               |
| Plumas                   | ---            | ---            | ---           | ---               | ---            | ---            | ---           | ---               |
| <b>District 30 Total</b> | ---            | ---            | ---           | ---               | ---            | ---            | ---           | ---               |
| Alameda                  | ---            | ---            | ---           | ---               | ---            | ---            | ---           | ---               |
| Contra Costa             | ---            | ---            | ---           | ---               | ---            | ---            | ---           | ---               |
| Lake                     | ---            | ---            | ---           | ---               | ---            | ---            | ---           | ---               |
| Marin                    | ---            | ---            | ---           | ---               | ---            | ---            | ---           | ---               |
| Monterey                 | ---            | ---            | ---           | ---               | ---            | ---            | ---           | ---               |
| Napa                     | ---            | ---            | ---           | ---               | ---            | ---            | ---           | ---               |
| San Benito               | ---            | ---            | ---           | ---               | ---            | ---            | ---           | ---               |
| San Francisco            | ---            | ---            | ---           | ---               | ---            | ---            | ---           | ---               |
| San Luis Obispo          | ---            | ---            | ---           | ---               | ---            | ---            | ---           | ---               |
| San Mateo                | ---            | ---            | ---           | ---               | ---            | ---            | ---           | ---               |
| Santa Clara              | ---            | ---            | ---           | ---               | ---            | ---            | ---           | ---               |
| Santa Cruz               | ---            | ---            | ---           | ---               | ---            | ---            | ---           | ---               |
| Sonoma                   | ---            | ---            | ---           | ---               | ---            | ---            | ---           | ---               |
| <b>District 40 Total</b> | ---            | ---            | ---           | ---               | ---            | ---            | ---           | ---               |
| Butte                    | 86,800         | 86,400         | 8,397         | 7,255,000         | 100,000        | 99,000         | 8,373         | 8,289,000         |
| Colusa                   | 126,300        | 125,600        | 8,232         | 10,339,000        | 138,500        | 137,000        | 8,139         | 11,150,000        |
| Glenn                    | 78,300         | 78,000         | 8,272         | 6,452,000         | 87,500         | 86,500         | 8,254         | 7,140,000         |
| Sacramento               | 7,800          | 7,800          | 8,064         | 629,000           | 8,200          | 8,200          | 7,683         | 630,000           |
| Solano                   | ---            | ---            | ---           | ---               | 700            | 700            | 9,000         | 63,000            |
| Sutter                   | 87,700         | 87,300         | 8,258         | 7,209,000         | 101,700        | 100,700        | 8,300         | 8,358,000         |
| Tehama                   | 800            | 800            | 6,750         | 54,000            | 900            | 900            | 6,667         | 60,000            |
| Yolo                     | 26,000         | 25,900         | 7,722         | 2,000,000         | 31,500         | 31,200         | 7,769         | 2,424,000         |
| Yuba                     | 37,100         | 37,000         | 7,954         | 2,943,000         | 36,000         | 35,800         | 7,821         | 2,800,000         |
| <b>District 50 Total</b> | <b>450,800</b> | <b>448,800</b> | <b>8,218</b>  | <b>36,881,000</b> | <b>505,000</b> | <b>500,000</b> | <b>8,183</b>  | <b>40,914,000</b> |
| Fresno                   | 2,000          | 2,000          | 7,150         | 143,000           | 1,300          | 1,300          | 6,308         | 82,000            |
| Kern                     | ---            | ---            | ---           | ---               | ---            | ---            | ---           | ---               |
| Kings                    | ---            | ---            | ---           | ---               | ---            | ---            | ---           | ---               |
| Madera                   | ---            | ---            | ---           | ---               | ---            | ---            | ---           | ---               |
| Merced                   | 4,300          | 4,300          | 7,744         | 333,000           | 6,600          | 6,600          | 8,136         | 537,000           |
| San Joaquin              | 4,500          | 4,500          | 7,556         | 340,000           | 5,800          | 5,800          | 7,690         | 446,000           |
| Stanislaus               | 2,200          | 2,200          | 6,727         | 148,000           | 2,300          | 2,300          | 7,174         | 165,000           |
| Tulare                   | ---            | ---            | ---           | ---               | ---            | ---            | ---           | ---               |
| <b>District 51 Total</b> | <b>13,000</b>  | <b>13,000</b>  | <b>7,415</b>  | <b>964,000</b>    | <b>16,000</b>  | <b>16,000</b>  | <b>7,688</b>  | <b>1,230,000</b>  |
| Alpine                   | ---            | ---            | ---           | ---               | ---            | ---            | ---           | ---               |
| Amador                   | ---            | ---            | ---           | ---               | ---            | ---            | ---           | ---               |
| Calaveras                | ---            | ---            | ---           | ---               | ---            | ---            | ---           | ---               |
| El Dorado                | ---            | ---            | ---           | ---               | ---            | ---            | ---           | ---               |
| Inyo                     | ---            | ---            | ---           | ---               | ---            | ---            | ---           | ---               |
| Mariposa                 | ---            | ---            | ---           | ---               | ---            | ---            | ---           | ---               |
| Mono                     | ---            | ---            | ---           | ---               | ---            | ---            | ---           | ---               |
| Nevada                   | ---            | ---            | ---           | ---               | ---            | ---            | ---           | ---               |
| Placer                   | 9,200          | 9,200          | 7,011         | 645,000           | 12,000         | 12,000         | 7,042         | 845,000           |
| Sierra                   | ---            | ---            | ---           | ---               | ---            | ---            | ---           | ---               |
| Tuolumne                 | ---            | ---            | ---           | ---               | ---            | ---            | ---           | ---               |
| <b>District 60 Total</b> | <b>9,200</b>   | <b>9,200</b>   | <b>7,011</b>  | <b>645,000</b>    | <b>12,000</b>  | <b>12,000</b>  | <b>7,042</b>  | <b>845,000</b>    |
| Imperial                 | ---            | ---            | ---           | ---               | ---            | ---            | ---           | ---               |
| Los Angeles              | ---            | ---            | ---           | ---               | ---            | ---            | ---           | ---               |
| Orange                   | ---            | ---            | ---           | ---               | ---            | ---            | ---           | ---               |
| Riverside                | ---            | ---            | ---           | ---               | ---            | ---            | ---           | ---               |
| San Bernardino           | ---            | ---            | ---           | ---               | ---            | ---            | ---           | ---               |
| San Diego                | ---            | ---            | ---           | ---               | ---            | ---            | ---           | ---               |
| Santa Barbara            | ---            | ---            | ---           | ---               | ---            | ---            | ---           | ---               |
| Ventura                  | ---            | ---            | ---           | ---               | ---            | ---            | ---           | ---               |
| <b>District 80 Total</b> | ---            | ---            | ---           | ---               | ---            | ---            | ---           | ---               |
| <b>STATE</b>             | <b>473,000</b> | <b>471,000</b> | <b>8,172</b>  | <b>38,490,000</b> | <b>533,000</b> | <b>528,000</b> | <b>8,142</b>  | <b>42,989,000</b> |

**CALIFORNIA SORGHUM: Acreage, Yield And Production By County, 2001-2002 1/**

| County                   | 2001         |           |             |            | 2002          |               |             |               |
|--------------------------|--------------|-----------|-------------|------------|---------------|---------------|-------------|---------------|
|                          | Planted      | Harvested | Yield/Acre  | Production | Planted       | Harvested     | Yield/Acre  | Production    |
|                          | <i>Acres</i> |           | <i>Tons</i> |            | <i>Acres</i>  |               | <i>Tons</i> |               |
| Del Norte                | ---          | ---       | ---         | ---        | ---           | ---           | ---         | ---           |
| Humboldt                 | ---          | ---       | ---         | ---        | ---           | ---           | ---         | ---           |
| Mendocino                | ---          | ---       | ---         | ---        | ---           | ---           | ---         | ---           |
| <b>District 10 Total</b> | ---          | ---       | ---         | ---        | ---           | ---           | ---         | ---           |
| Shasta                   | ---          | ---       | ---         | ---        | ---           | ---           | ---         | ---           |
| Siskiyou                 | ---          | ---       | ---         | ---        | ---           | ---           | ---         | ---           |
| Trinity                  | ---          | ---       | ---         | ---        | ---           | ---           | ---         | ---           |
| <b>District 20 Total</b> | ---          | ---       | ---         | ---        | ---           | ---           | ---         | ---           |
| Lassen                   | ---          | ---       | ---         | ---        | ---           | ---           | ---         | ---           |
| Modoc                    | ---          | ---       | ---         | ---        | ---           | ---           | ---         | ---           |
| Plumas                   | ---          | ---       | ---         | ---        | ---           | ---           | ---         | ---           |
| <b>District 30 Total</b> | ---          | ---       | ---         | ---        | ---           | ---           | ---         | ---           |
| Alameda                  | ---          | ---       | ---         | ---        | ---           | ---           | ---         | ---           |
| Contra Costa             | ---          | ---       | ---         | ---        | ---           | ---           | ---         | ---           |
| Lake                     | ---          | ---       | ---         | ---        | ---           | ---           | ---         | ---           |
| Marin                    | ---          | ---       | ---         | ---        | ---           | ---           | ---         | ---           |
| Monterey                 | ---          | ---       | ---         | ---        | ---           | ---           | ---         | ---           |
| Napa                     | ---          | ---       | ---         | ---        | ---           | ---           | ---         | ---           |
| San Benito               | ---          | ---       | ---         | ---        | ---           | ---           | ---         | ---           |
| San Francisco            | ---          | ---       | ---         | ---        | ---           | ---           | ---         | ---           |
| San Luis Obispo          | ---          | ---       | ---         | ---        | ---           | ---           | ---         | ---           |
| San Mateo                | ---          | ---       | ---         | ---        | ---           | ---           | ---         | ---           |
| Santa Clara              | ---          | ---       | ---         | ---        | ---           | ---           | ---         | ---           |
| Santa Cruz               | ---          | ---       | ---         | ---        | ---           | ---           | ---         | ---           |
| Sonoma                   | ---          | ---       | ---         | ---        | ---           | ---           | ---         | ---           |
| <b>District 40 Total</b> | ---          | ---       | ---         | ---        | ---           | ---           | ---         | ---           |
| Butte                    | ---          | ---       | ---         | ---        | ---           | ---           | ---         | ---           |
| Colusa                   | ---          | ---       | ---         | ---        | ---           | ---           | ---         | ---           |
| Glenn                    | ---          | ---       | ---         | ---        | ---           | ---           | ---         | ---           |
| Sacramento               | ---          | ---       | ---         | ---        | 1,100         | 900           | 2.58        | 2,324         |
| Solano                   | ---          | ---       | ---         | ---        | 1,000         | 900           | 2.77        | 2,492         |
| Sutter                   | ---          | ---       | ---         | ---        | 700           | 600           | 2.71        | 1,624         |
| Tehama                   | ---          | ---       | ---         | ---        | ---           | ---           | ---         | ---           |
| Yolo                     | ---          | ---       | ---         | ---        | 1,200         | 1,200         | 2.73        | 3,276         |
| Yuba                     | ---          | ---       | ---         | ---        | ---           | ---           | ---         | ---           |
| Other Counties 2/        | ---          | ---       | ---         | ---        | 500           | 400           | 2.45        | 980           |
| <b>District 50 Total</b> | ---          | ---       | ---         | ---        | <b>4,500</b>  | <b>4,000</b>  | <b>2.67</b> | <b>10,696</b> |
| Fresno                   | ---          | ---       | ---         | ---        | ---           | ---           | ---         | ---           |
| Kern                     | ---          | ---       | ---         | ---        | 1,900         | 1,600         | 2.68        | 4,284         |
| Kings                    | ---          | ---       | ---         | ---        | 700           | ---           | ---         | ---           |
| Madera                   | ---          | ---       | ---         | ---        | ---           | ---           | ---         | ---           |
| Merced                   | ---          | ---       | ---         | ---        | ---           | ---           | ---         | ---           |
| San Joaquin              | ---          | ---       | ---         | ---        | ---           | ---           | ---         | ---           |
| Stanislaus               | ---          | ---       | ---         | ---        | ---           | ---           | ---         | ---           |
| Tulare                   | ---          | ---       | ---         | ---        | 3,300         | 3,000         | 2.66        | 7,980         |
| Other Counties 2/        | ---          | ---       | ---         | ---        | 1,100         | 700           | 2.56        | 1,792         |
| <b>District 51 Total</b> | ---          | ---       | ---         | ---        | <b>7,000</b>  | <b>5,300</b>  | <b>2.65</b> | <b>14,056</b> |
| Alpine                   | ---          | ---       | ---         | ---        | ---           | ---           | ---         | ---           |
| Amador                   | ---          | ---       | ---         | ---        | ---           | ---           | ---         | ---           |
| Calaveras                | ---          | ---       | ---         | ---        | ---           | ---           | ---         | ---           |
| El Dorado                | ---          | ---       | ---         | ---        | ---           | ---           | ---         | ---           |
| Inyo                     | ---          | ---       | ---         | ---        | ---           | ---           | ---         | ---           |
| Mariposa                 | ---          | ---       | ---         | ---        | ---           | ---           | ---         | ---           |
| Mono                     | ---          | ---       | ---         | ---        | ---           | ---           | ---         | ---           |
| Nevada                   | ---          | ---       | ---         | ---        | ---           | ---           | ---         | ---           |
| Placer                   | ---          | ---       | ---         | ---        | ---           | ---           | ---         | ---           |
| Sierra                   | ---          | ---       | ---         | ---        | ---           | ---           | ---         | ---           |
| Tuolumne                 | ---          | ---       | ---         | ---        | ---           | ---           | ---         | ---           |
| <b>District 60 Total</b> | ---          | ---       | ---         | ---        | ---           | ---           | ---         | ---           |
| Imperial                 | ---          | ---       | ---         | ---        | ---           | ---           | ---         | ---           |
| Los Angeles              | ---          | ---       | ---         | ---        | ---           | ---           | ---         | ---           |
| Orange                   | ---          | ---       | ---         | ---        | ---           | ---           | ---         | ---           |
| Riverside                | ---          | ---       | ---         | ---        | 2,300         | 1,400         | 2.66        | 3,724         |
| San Bernardino           | ---          | ---       | ---         | ---        | 500           | ---           | ---         | ---           |
| San Diego                | ---          | ---       | ---         | ---        | ---           | ---           | ---         | ---           |
| Santa Barbara            | ---          | ---       | ---         | ---        | ---           | ---           | ---         | ---           |
| Ventura                  | ---          | ---       | ---         | ---        | ---           | ---           | ---         | ---           |
| Other Counties 2/        | ---          | ---       | ---         | ---        | 200           | 100           | 2.52        | 252           |
| <b>District 80 Total</b> | ---          | ---       | ---         | ---        | <b>3,000</b>  | <b>1,500</b>  | <b>2.65</b> | <b>3,976</b>  |
| Other Districts 3/       | ---          | ---       | ---         | ---        | 500           | 200           | 2.66        | 532           |
| <b>STATE</b>             | ---          | ---       | ---         | ---        | <b>15,000</b> | <b>11,000</b> | <b>2.66</b> | <b>29,260</b> |

1/ Publication of sorghum county estimates data reinstated in 2002.

2/ Includes one or more counties within a district that normally have less than 400 acres planted.

3/ Includes counties from one or more districts that normally have less than 400 acres planted.

**CALIFORNIA SUGAR BEETS: Acreage, Yield And Production By County, 2001-2002**

| County                   | 2001          |               |             |                  |              | 2002          |               |             |                  |              |
|--------------------------|---------------|---------------|-------------|------------------|--------------|---------------|---------------|-------------|------------------|--------------|
|                          | Planted       | Harvested     | Yield/Acre  | Production       | Sucrose      | Planted       | Harvested     | Yield/Acre  | Production       | Sucrose      |
|                          | Acres         |               | Tons        |                  | Percent      | Acres         |               | Tons        |                  | Percent      |
| Del Norte                | ---           | ---           | ---         | ---              | ---          | ---           | ---           | ---         | ---              | ---          |
| Humboldt                 | ---           | ---           | ---         | ---              | ---          | ---           | ---           | ---         | ---              | ---          |
| Mendocino                | ---           | ---           | ---         | ---              | ---          | ---           | ---           | ---         | ---              | ---          |
| <b>District 10 Total</b> | ---           | ---           | ---         | ---              | ---          | ---           | ---           | ---         | ---              | ---          |
| Shasta                   | ---           | ---           | ---         | ---              | ---          | ---           | ---           | ---         | ---              | ---          |
| Siskiyou                 | ---           | ---           | ---         | ---              | ---          | ---           | ---           | ---         | ---              | ---          |
| Trinity                  | ---           | ---           | ---         | ---              | ---          | ---           | ---           | ---         | ---              | ---          |
| <b>District 20 Total</b> | ---           | ---           | ---         | ---              | ---          | ---           | ---           | ---         | ---              | ---          |
| Lassen                   | ---           | ---           | ---         | ---              | ---          | ---           | ---           | ---         | ---              | ---          |
| Modoc                    | ---           | ---           | ---         | ---              | ---          | ---           | ---           | ---         | ---              | ---          |
| Plumas                   | ---           | ---           | ---         | ---              | ---          | ---           | ---           | ---         | ---              | ---          |
| <b>District 30 Total</b> | ---           | ---           | ---         | ---              | ---          | ---           | ---           | ---         | ---              | ---          |
| Alameda                  | ---           | ---           | ---         | ---              | ---          | ---           | ---           | ---         | ---              | ---          |
| Contra Costa             | ---           | ---           | ---         | ---              | ---          | ---           | ---           | ---         | ---              | ---          |
| Lake                     | ---           | ---           | ---         | ---              | ---          | ---           | ---           | ---         | ---              | ---          |
| Marin                    | ---           | ---           | ---         | ---              | ---          | ---           | ---           | ---         | ---              | ---          |
| Monterey                 | ---           | ---           | ---         | ---              | ---          | ---           | ---           | ---         | ---              | ---          |
| Napa                     | ---           | ---           | ---         | ---              | ---          | ---           | ---           | ---         | ---              | ---          |
| San Benito               | ---           | ---           | ---         | ---              | ---          | ---           | ---           | ---         | ---              | ---          |
| San Francisco            | ---           | ---           | ---         | ---              | ---          | ---           | ---           | ---         | ---              | ---          |
| San Luis Obispo          | ---           | ---           | ---         | ---              | ---          | ---           | ---           | ---         | ---              | ---          |
| San Mateo                | ---           | ---           | ---         | ---              | ---          | ---           | ---           | ---         | ---              | ---          |
| Santa Clara              | ---           | ---           | ---         | ---              | ---          | ---           | ---           | ---         | ---              | ---          |
| Santa Cruz               | ---           | ---           | ---         | ---              | ---          | ---           | ---           | ---         | ---              | ---          |
| Sonoma                   | ---           | ---           | ---         | ---              | ---          | ---           | ---           | ---         | ---              | ---          |
| <b>District 40 Total</b> | ---           | ---           | ---         | ---              | ---          | ---           | ---           | ---         | ---              | ---          |
| Butte                    | ---           | ---           | ---         | ---              | ---          | ---           | ---           | ---         | ---              | ---          |
| Colusa                   | ---           | ---           | ---         | ---              | ---          | ---           | ---           | ---         | ---              | ---          |
| Glenn                    | ---           | ---           | ---         | ---              | ---          | ---           | ---           | ---         | ---              | ---          |
| Sacramento               | ---           | ---           | ---         | ---              | ---          | ---           | ---           | ---         | ---              | ---          |
| Solano                   | ---           | ---           | ---         | ---              | ---          | ---           | ---           | ---         | ---              | ---          |
| Sutter                   | ---           | ---           | ---         | ---              | ---          | ---           | ---           | ---         | ---              | ---          |
| Tehama                   | ---           | ---           | ---         | ---              | ---          | ---           | ---           | ---         | ---              | ---          |
| Yolo                     | ---           | ---           | ---         | ---              | ---          | ---           | ---           | ---         | ---              | ---          |
| Yuba                     | ---           | ---           | ---         | ---              | ---          | ---           | ---           | ---         | ---              | ---          |
| <b>District 50 Total</b> | ---           | ---           | ---         | ---              | ---          | ---           | ---           | ---         | ---              | ---          |
| Fresno                   | 11,800        | 11,300        | 30.5        | 345,000          | 15.22        | 12,200        | 12,100        | 38.2        | 462,000          | 14.94        |
| Kern                     | 2,000         | 1,900         | 33.2        | 63,000           | 15.68        | 3,300         | 3,200         | 38.8        | 124,000          | 15.11        |
| Kings                    | 2,000         | 2,000         | 27.5        | 55,000           | 14.88        | 2,800         | 2,700         | 31.5        | 85,000           | 14.05        |
| Madera                   | 600           | 400           | 25.0        | 10,000           | 15.52        | ---           | ---           | ---         | ---              | ---          |
| Merced                   | 4,000         | 3,300         | 23.3        | 77,000           | 16.41        | 4,400         | 4,400         | 33.0        | 145,000          | 16.00        |
| San Joaquin              | ---           | ---           | ---         | ---              | ---          | ---           | ---           | ---         | ---              | ---          |
| Stanislaus               | ---           | ---           | ---         | ---              | ---          | ---           | ---           | ---         | ---              | ---          |
| Tulare                   | 900           | 800           | 32.5        | 26,000           | 12.20        | 1,000         | 1,000         | 48.0        | 48,000           | 12.41        |
| Other Counties 1/        | 200           | 200           | 35.0        | 7,000            | 16.10        | 700           | 700           | 34.3        | 24,000           | 15.00        |
| <b>District 51 Total</b> | <b>21,500</b> | <b>19,900</b> | <b>29.3</b> | <b>583,000</b>   | <b>15.28</b> | <b>24,400</b> | <b>24,100</b> | <b>36.8</b> | <b>888,000</b>   | <b>14.92</b> |
| Alpine                   | ---           | ---           | ---         | ---              | ---          | ---           | ---           | ---         | ---              | ---          |
| Amador                   | ---           | ---           | ---         | ---              | ---          | ---           | ---           | ---         | ---              | ---          |
| Calaveras                | ---           | ---           | ---         | ---              | ---          | ---           | ---           | ---         | ---              | ---          |
| El Dorado                | ---           | ---           | ---         | ---              | ---          | ---           | ---           | ---         | ---              | ---          |
| Inyo                     | ---           | ---           | ---         | ---              | ---          | ---           | ---           | ---         | ---              | ---          |
| Mariposa                 | ---           | ---           | ---         | ---              | ---          | ---           | ---           | ---         | ---              | ---          |
| Mono                     | ---           | ---           | ---         | ---              | ---          | ---           | ---           | ---         | ---              | ---          |
| Nevada                   | ---           | ---           | ---         | ---              | ---          | ---           | ---           | ---         | ---              | ---          |
| Placer                   | ---           | ---           | ---         | ---              | ---          | ---           | ---           | ---         | ---              | ---          |
| Sierra                   | ---           | ---           | ---         | ---              | ---          | ---           | ---           | ---         | ---              | ---          |
| Tuolumne                 | ---           | ---           | ---         | ---              | ---          | ---           | ---           | ---         | ---              | ---          |
| <b>District 60 Total</b> | ---           | ---           | ---         | ---              | ---          | ---           | ---           | ---         | ---              | ---          |
| Imperial                 | 24,900        | 24,700        | 40.9        | 1,009,000        | 16.15        | 25,600        | 25,600        | 42.0        | 1,076,000        | 16.50        |
| Los Angeles              | ---           | ---           | ---         | ---              | ---          | ---           | ---           | ---         | ---              | ---          |
| Orange                   | ---           | ---           | ---         | ---              | ---          | ---           | ---           | ---         | ---              | ---          |
| Riverside                | ---           | ---           | ---         | ---              | ---          | ---           | ---           | ---         | ---              | ---          |
| San Bernardino           | ---           | ---           | ---         | ---              | ---          | ---           | ---           | ---         | ---              | ---          |
| San Diego                | ---           | ---           | ---         | ---              | ---          | ---           | ---           | ---         | ---              | ---          |
| Santa Barbara            | ---           | ---           | ---         | ---              | ---          | ---           | ---           | ---         | ---              | ---          |
| Ventura                  | ---           | ---           | ---         | ---              | ---          | ---           | ---           | ---         | ---              | ---          |
| <b>District 80 Total</b> | <b>24,900</b> | <b>24,700</b> | <b>40.9</b> | <b>1,009,000</b> | <b>16.15</b> | <b>25,600</b> | <b>25,600</b> | <b>42.0</b> | <b>1,076,000</b> | <b>16.50</b> |
| Other Districts 2/       | 200           | 100           | 40.0        | 4,000            | 14.95        | 200           | 200           | 35.0        | 7,000            | 15.20        |
| <b>STATE</b>             | <b>46,600</b> | <b>44,700</b> | <b>35.7</b> | <b>1,596,000</b> | <b>15.83</b> | <b>50,200</b> | <b>49,900</b> | <b>39.5</b> | <b>1,971,000</b> | <b>15.78</b> |

1/ Includes one or more counties within a district that normally have less than 300 acres planted.

2/ Includes counties from one or more districts that normally have less than 300 acres planted.

**CALIFORNIA WHEAT, ALL: Acreage, Yield And Production By County, 2001-2002**

| County                   | 2001           |                |             |                  | 2002           |                |             |                |
|--------------------------|----------------|----------------|-------------|------------------|----------------|----------------|-------------|----------------|
|                          | Planted        | Harvested      | Yield/Acre  | Production       | Planted        | Harvested      | Yield/Acre  | Production     |
|                          | <i>Acres</i>   |                | <i>Tons</i> |                  | <i>Acres</i>   |                | <i>Tons</i> |                |
| Del Norte                | ---            | ---            | ---         | ---              | ---            | ---            | ---         | ---            |
| Humboldt                 | ---            | ---            | ---         | ---              | ---            | ---            | ---         | ---            |
| Mendocino                | ---            | ---            | ---         | ---              | ---            | ---            | ---         | ---            |
| <b>District 10 Total</b> | ---            | ---            | ---         | ---              | ---            | ---            | ---         | ---            |
| Shasta                   | 1,500          | 1,000          | 1.71        | 1,710            | 1,500          | 1,000          | 1.80        | 1,800          |
| Siskiyou                 | 4,500          | 3,000          | 2.14        | 6,420            | 6,500          | 5,000          | 1.60        | 8,010          |
| Trinity                  | ---            | ---            | ---         | ---              | ---            | ---            | ---         | ---            |
| <b>District 20 Total</b> | <b>6,000</b>   | <b>4,000</b>   | <b>2.03</b> | <b>8,130</b>     | <b>8,000</b>   | <b>6,000</b>   | <b>1.64</b> | <b>9,810</b>   |
| Lassen                   | 4,500          | 1,500          | 2.02        | 3,030            | 5,000          | 2,000          | 1.95        | 3,900          |
| Modoc                    | 5,500          | 1,500          | 1.90        | 2,850            | 7,000          | 3,000          | 2.05        | 6,150          |
| Plumas                   | ---            | ---            | ---         | ---              | ---            | ---            | ---         | ---            |
| <b>District 30 Total</b> | <b>10,000</b>  | <b>3,000</b>   | <b>1.96</b> | <b>5,880</b>     | <b>12,000</b>  | <b>5,000</b>   | <b>2.01</b> | <b>10,050</b>  |
| Alameda                  | 2,000          | 500            | 2.22        | 1,110            | 3,000          | 500            | 1.44        | 720            |
| Contra Costa             | 4,000          | 2,500          | 1.90        | 4,740            | 3,500          | 1,500          | 1.60        | 2,400          |
| Lake                     | ---            | ---            | ---         | ---              | ---            | ---            | ---         | ---            |
| Marin                    | ---            | ---            | ---         | ---              | ---            | ---            | ---         | ---            |
| Monterey                 | 3,500          | 1,500          | 1.10        | 1,650            | 1,500          | 500            | 1.50        | 750            |
| Napa                     | ---            | ---            | ---         | ---              | ---            | ---            | ---         | ---            |
| San Benito               | 3,000          | 1,500          | 1.52        | 2,280            | 2,500          | 1,000          | 1.50        | 1,500          |
| San Francisco            | ---            | ---            | ---         | ---              | ---            | ---            | ---         | ---            |
| San Luis Obispo          | 3,500          | 1,500          | 1.18        | 1,770            | 3,000          | 1,000          | 1.38        | 1,380          |
| San Mateo                | ---            | ---            | ---         | ---              | ---            | ---            | ---         | ---            |
| Santa Clara              | ---            | ---            | ---         | ---              | ---            | ---            | ---         | ---            |
| Santa Cruz               | ---            | ---            | ---         | ---              | ---            | ---            | ---         | ---            |
| Sonoma                   | 1,000          | 500            | 1.80        | 900              | 1,500          | 500            | 1.50        | 750            |
| <b>District 40 Total</b> | <b>17,000</b>  | <b>8,000</b>   | <b>1.56</b> | <b>12,450</b>    | <b>15,000</b>  | <b>5,000</b>   | <b>1.50</b> | <b>7,500</b>   |
| Butte                    | 4,000          | 4,000          | 1.96        | 7,830            | 2,000          | 1,000          | 2.40        | 2,400          |
| Colusa                   | 24,500         | 23,500         | 2.21        | 51,990           | 24,000         | 17,000         | 2.12        | 36,000         |
| Glenn                    | 11,500         | 9,500          | 2.32        | 22,050           | 11,000         | 6,000          | 2.13        | 12,750         |
| Sacramento               | 17,000         | 13,500         | 2.23        | 30,150           | 13,000         | 7,000          | 2.25        | 15,750         |
| Solano                   | 24,000         | 24,000         | 2.18        | 52,200           | 20,000         | 15,000         | 2.44        | 36,600         |
| Sutter                   | 13,000         | 11,000         | 2.10        | 23,100           | 11,000         | 7,000          | 2.46        | 17,250         |
| Tehama                   | 3,000          | 1,000          | 1.62        | 1,620            | 2,000          | 500            | 1.98        | 990            |
| Yolo                     | 42,500         | 40,000         | 2.51        | 100,440          | 31,000         | 23,000         | 2.41        | 55,500         |
| Yuba                     | 500            | 500            | 1.68        | 840              | 1,000          | 500            | 1.92        | 960            |
| <b>District 50 Total</b> | <b>140,000</b> | <b>127,000</b> | <b>2.29</b> | <b>290,220</b>   | <b>115,000</b> | <b>77,000</b>  | <b>2.31</b> | <b>178,200</b> |
| Fresno                   | 62,500         | 59,000         | 2.40        | 141,360          | 45,000         | 37,000         | 2.76        | 102,300        |
| Kern                     | 65,000         | 37,000         | 2.14        | 79,110           | 55,000         | 35,000         | 2.44        | 85,500         |
| Kings                    | 79,000         | 70,500         | 2.09        | 147,060          | 56,000         | 49,000         | 2.50        | 122,700        |
| Madera                   | 29,000         | 13,500         | 2.16        | 29,130           | 34,000         | 16,000         | 2.32        | 37,050         |
| Merced                   | 21,500         | 8,000          | 2.28        | 18,210           | 54,000         | 21,000         | 2.39        | 50,250         |
| San Joaquin              | 38,000         | 32,000         | 2.24        | 71,700           | 22,000         | 18,000         | 2.49        | 44,850         |
| Stanislaus               | 4,000          | 1,500          | 2.46        | 3,690            | 12,000         | 4,000          | 2.06        | 8,250          |
| Tulare                   | 61,000         | 29,500         | 2.37        | 69,840           | 115,000        | 56,000         | 2.18        | 122,100        |
| <b>District 51 Total</b> | <b>360,000</b> | <b>251,000</b> | <b>2.23</b> | <b>560,100</b>   | <b>393,000</b> | <b>236,000</b> | <b>2.43</b> | <b>573,000</b> |
| Alpine                   | ---            | ---            | ---         | ---              | ---            | ---            | ---         | ---            |
| Amador                   | ---            | ---            | ---         | ---              | ---            | ---            | ---         | ---            |
| Calaveras                | ---            | ---            | ---         | ---              | ---            | ---            | ---         | ---            |
| El Dorado                | ---            | ---            | ---         | ---              | ---            | ---            | ---         | ---            |
| Inyo                     | ---            | ---            | ---         | ---              | ---            | ---            | ---         | ---            |
| Mariposa                 | ---            | ---            | ---         | ---              | ---            | ---            | ---         | ---            |
| Mono                     | ---            | ---            | ---         | ---              | ---            | ---            | ---         | ---            |
| Nevada                   | ---            | ---            | ---         | ---              | ---            | ---            | ---         | ---            |
| Placer                   | 4,500          | 2,000          | 2.24        | 4,470            | 5,000          | 2,000          | 2.34        | 4,680          |
| Sierra                   | ---            | ---            | ---         | ---              | ---            | ---            | ---         | ---            |
| Tuolumne                 | ---            | ---            | ---         | ---              | ---            | ---            | ---         | ---            |
| <b>District 60 Total</b> | <b>4,500</b>   | <b>2,000</b>   | <b>2.24</b> | <b>4,470</b>     | <b>5,000</b>   | <b>2,000</b>   | <b>2.34</b> | <b>4,680</b>   |
| Imperial                 | 41,500         | 38,500         | 3.16        | 121,830          | 43,000         | 40,500         | 3.11        | 126,000        |
| Los Angeles              | ---            | ---            | ---         | ---              | ---            | ---            | ---         | ---            |
| Orange                   | ---            | ---            | ---         | ---              | ---            | ---            | ---         | ---            |
| Riverside                | 34,000         | 25,500         | 1.82        | 46,500           | 32,500         | 17,500         | 1.96        | 34,260         |
| San Bernardino           | ---            | ---            | ---         | ---              | ---            | ---            | ---         | ---            |
| San Diego                | 1,500          | 1,500          | 2.00        | 3,000            | 1,000          | 500            | 1.50        | 750            |
| Santa Barbara            | 500            | 500            | 1.14        | 570              | 500            | 500            | 1.50        | 750            |
| Ventura                  | ---            | ---            | ---         | ---              | ---            | ---            | ---         | ---            |
| <b>District 80 Total</b> | <b>77,500</b>  | <b>66,000</b>  | <b>2.60</b> | <b>171,900</b>   | <b>77,000</b>  | <b>59,000</b>  | <b>2.74</b> | <b>161,760</b> |
| <b>STATE</b>             | <b>615,000</b> | <b>461,000</b> | <b>2.28</b> | <b>1,053,150</b> | <b>625,000</b> | <b>390,000</b> | <b>2.42</b> | <b>945,000</b> |

# California Floriculture

Floriculture halted its previously rapid growth in 2002. The industry enjoyed record wholesale values due to the strength of its leading producing states—California, Florida, Michigan, Texas and Ohio. These five states account for over half of the national value in floriculture.

California maintained its position as the leading floriculture state in the nation, with a total wholesale value of \$949 million. This total represents 21 percent of the national value and a 4 percent decrease from the previous year. Aided by its favorable coastal climate, California now accounts for 68 percent of the national value for all fresh, cut flowers. At \$279 million in sales, this represents a 3 percent decrease from the \$287 million of 2001. The rose is the most popular cut flower in the nation, and California accounts for roughly 64 percent of the value for all fresh, cut roses grown in the United States. While cut flower demand has continued to rise, domestic production has been declining with over two-thirds of the major cut flowers now imported. Most imports are coming from Colombia, Costa Rica, Ecuador, Mexico and the Netherlands.

California's total sales of potted flowering plants fell 7 percent from \$213 million in 2001 to \$198 million in 2002. California is still the leading state with 24 percent of the national value. Sales of foliage plants showed a 6 percent decrease from \$96.6 million in 2001 to \$90.4 million in 2002.

The wholesale value of bedding and garden plants fell 1 percent from \$303 million in 2001 to \$301 million in 2002. The value of cut, cultivated greens was down fractionally, falling from \$17.4 million in 2001 to \$17.1 million in 2002.

The number of floriculture producers in the state has been in decline in recent years. Of those producers with sales greater than \$10,000, California now has 802 growers compared to 917 in 2001.

**Floriculture Production and Value, 2002 1/**

| Kind                                                    | Number of Producers | Sales      |             |            | Wholesale Price 2/<br>Dollars | Value of Sales at Wholesale<br>\$1,000 |
|---------------------------------------------------------|---------------------|------------|-------------|------------|-------------------------------|----------------------------------------|
|                                                         |                     | Unit       | Number Sold | Wholesale  |                               |                                        |
|                                                         |                     |            | 1,000       | Percent    |                               |                                        |
| <b>Cut Flowers</b>                                      |                     |            |             |            |                               | <b>278,581</b>                         |
| Alstroemeria                                            | 37                  | Stems      | 14,490      | 99         | 0.16                          | 2,304                                  |
| Carnations, Standard                                    | 21                  | Stems      | 17,902      | 97         | 0.15                          | 2,596                                  |
| Chrysanthemums, Pompon                                  | 30                  | Bunches    | 11,532      | 99         | 1.30                          | 14,992                                 |
| Delphinium and Larkspur                                 | 58                  | Stems      | 37,773      | 100        | 0.22                          | 8,348                                  |
| Gerbera Daisy                                           | 27                  | Stems      | 73,557      | 100        | 0.29                          | 21,626                                 |
| Gladioli                                                | 17                  | Spikes     | 17,726      | 100        | 0.30                          | 5,282                                  |
| Iris                                                    | 42                  | Stems      | 61,529      | 100        | 0.20                          | 12,183                                 |
| Lilies, All                                             | 51                  | Stems      | 78,819      | 99         | 0.59                          | 46,503                                 |
| Lisianthus                                              | 41                  | Stems      | 13,056      | 99         | 0.45                          | 5,862                                  |
| Orchids, All                                            | 13                  | Blooms     | 8,100       | 99         | 0.72                          | 5,824                                  |
| Roses, All                                              | 41                  | Stems      | 105,706     | 99         | 0.34                          | 36,363                                 |
| Snapdragons                                             | 53                  | Spikes     | 45,736      | 99         | 0.23                          | 10,656                                 |
| Tulips                                                  | 30                  | Stems      | 47,860      | 99         | 0.31                          | 14,837                                 |
| Other Cut Flowers                                       | 158                 | ---        | ---         | 91         | ---                           | 91,205                                 |
| <b>Potted Flowering Plants</b>                          |                     |            |             |            |                               | <b>197,940</b>                         |
| African Violets                                         | 14                  | Pots       | 1,622       | 100        | 1.74                          | 2,817                                  |
| Finished Florist Azaleas                                | 24                  | Pots       | 1,515       | 97         | 5.17                          | 7,835                                  |
| Florist Chrysanthemums                                  | 19                  | Pots       | 6,693       | 100        | 2.81                          | 18,805                                 |
| Easter Lilies                                           | 30                  | Pots       | 1,415       | 100        | 4.30                          | 6,088                                  |
| Orchids                                                 | 41                  | Pots       | 4,298       | 95         | 9.52                          | 40,903                                 |
| Poinsettias                                             | 89                  | Pots       | 9,360       | 95         | 4.07                          | 38,077                                 |
| Spring Flowering Bulbs                                  | 29                  | Pots       | 2,705       | 100        | 2.75                          | 7,429                                  |
| Other Potted Flowering Plants                           | 80                  | Pots       | 19,870      | 99         | 3.37                          | 75,986                                 |
| <b>Foliage Plants for Indoor or Patio Use</b>           |                     |            |             |            |                               | <b>90,412</b>                          |
| Hanging Baskets                                         | 60                  | Baskets    | 3,977       | 100        | 3.50                          | 13,920                                 |
| Potted Foliage                                          | 106                 | ---        | ---         | 98         | ---                           | 76,492                                 |
| <b>Annual Bedding/Garden Plants</b>                     |                     |            |             |            |                               | <b>301,383</b>                         |
| Flats                                                   |                     |            |             |            |                               |                                        |
| Begonias                                                | 51                  | Flats      | 461         | 96         | 8.46                          | 3,900                                  |
| Geraniums (Cutting)                                     | 19                  | Flats      | 181         | 98         | 11.96                         | 2,165                                  |
| Geraniums (Seed)                                        | 6                   | Flats      | 13          | 100        | 9.93                          | 129                                    |
| New Guinea Impatiens                                    | 13                  | Flats      | 111         | 97         | 10.85                         | 1,204                                  |
| Impatiens                                               | 62                  | Flats      | 1,844       | 99         | 9.95                          | 18,348                                 |
| Marigolds                                               | 57                  | Flats      | 1,055       | 99         | 10.43                         | 11,004                                 |
| Pansy/Viola                                             | 59                  | Flats      | 1,837       | 99         | 10.23                         | 18,793                                 |
| Petunias                                                | 62                  | Flats      | 1,662       | 97         | 10.09                         | 16,770                                 |
| Other Flowering and Foliar                              | 64                  | Flats      | 6,857       | 99         | 9.70                          | 66,526                                 |
| Vegetable Type                                          | 46                  | Flats      | 1,590       | 99         | 10.29                         | 16,361                                 |
| Potted                                                  |                     |            |             |            |                               |                                        |
| Begonias                                                | 50                  | Pots       | 2,127       | 78         | 1.10                          | 2,341                                  |
| Geraniums (Cutting)                                     | 48                  | Pots       | 7,303       | 100        | 1.52                          | 11,077                                 |
| Geraniums (Seed)                                        | 22                  | Pots       | 2,059       | 97         | 1.27                          | 2,605                                  |
| New Guinea Impatiens                                    | 47                  | Pots       | 2,285       | 100        | 1.48                          | 3,378                                  |
| Impatiens                                               | 50                  | Pots       | 5,324       | 89         | 0.82                          | 4,363                                  |
| Marigolds                                               | 38                  | Pots       | 1,954       | 92         | 0.95                          | 1,864                                  |
| Pansy/Viola                                             | 40                  | Pots       | 4,348       | 91         | 0.84                          | 3,648                                  |
| Petunias                                                | 40                  | Pots       | 4,081       | 96         | 1.03                          | 4,184                                  |
| Other Flowering and Foliar                              | 64                  | Pots       | 33,671      | 97         | 1.38                          | 46,484                                 |
| Vegetable Type                                          | 40                  | Pots       | 6,319       | 99         | 0.92                          | 5,883                                  |
| Hanging Baskets                                         |                     |            |             |            |                               |                                        |
| Begonias                                                | 19                  | Baskets    | 25          | 94         | 7.08                          | 177                                    |
| Geraniums (Cutting)                                     | 30                  | Baskets    | 175         | 99         | 6.83                          | 1,195                                  |
| Geraniums (Seed)                                        | 6                   | Baskets    | 18          | 75         | 7.74                          | 139                                    |
| New Guinea Impatiens                                    | 26                  | Baskets    | 176         | 99         | 6.72                          | 1,183                                  |
| Impatiens                                               | 25                  | Baskets    | 140         | 99         | 5.62                          | 787                                    |
| Petunias                                                | 20                  | Baskets    | 53          | 97         | 6.06                          | 321                                    |
| Other Flowering                                         | 33                  | Baskets    | 795         | 99         | 7.77                          | 6,177                                  |
| Herbaceous Perennials 3/<br>Hardy/Garden Chrysanthemums | 39                  | Pots       | 5,745       | 100        | 1.29                          | 7,383                                  |
| Hosta                                                   | 18                  | Pots       | 76          | 95         | 3.55                          | 270                                    |
| Other                                                   | 82                  | Pots       | 19,898      | 97         | 2.15                          | 42,724                                 |
| <b>Total Cut Cultivated Greens 4/</b>                   | <b>42</b>           | <b>---</b> | <b>---</b>  | <b>99</b>  | <b>---</b>                    | <b>17,052</b>                          |
| <b>Propagative (Unfinished)</b>                         |                     |            |             |            |                               | <b>63,261</b>                          |
| Cut Flowers                                             | ---                 | ---        | ---         | ---        | ---                           | 6,565                                  |
| Potted Flowering Plants                                 | ---                 | ---        | ---         | ---        | ---                           | 18,011                                 |
| Bedding/Garden Plants                                   | ---                 | ---        | ---         | ---        | ---                           | 30,297                                 |
| Herbaceous Perennial Plants                             | ---                 | ---        | ---         | ---        | ---                           | 4,423                                  |
| Foliage Plants                                          | ---                 | ---        | ---         | ---        | ---                           | 3,965                                  |
| <b>TOTAL ALL PLANTS</b>                                 | <b>---</b>          | <b>---</b> | <b>---</b>  | <b>---</b> | <b>---</b>                    | <b>948,629</b>                         |

1/ The total covered growing area of 119,788,000 square feet consisted of the following: 21,363,000 square feet of shade and temporary cover; 15,807,000 square feet of glass; 27,987,000 square feet of fiberglass and other rigid greenhouses; 54,631,000 square feet of film plastic (single/multi) greenhouses; and 7,544,000 open ground.

2/ For potted plants, price represents a weighted average for plants sold in pots less than 5 inches and in pots 5 inches or more.

3/ Pot price is a weighted average of all pots to avoid disclosure of individual operations.

4/ Total includes Leatherleaf Ferns, which are not published to avoid disclosure of individual operations.

**Floriculture Production and Value, 2001 1/**

| Kind                                                    | Number of Producers | Sales      |             |            | Wholesale Price 2/<br>Dollars | Value of Sales at Wholesale<br>\$1,000 |
|---------------------------------------------------------|---------------------|------------|-------------|------------|-------------------------------|----------------------------------------|
|                                                         |                     | Unit       | Number Sold | Wholesale  |                               |                                        |
|                                                         |                     |            | 1,000       | Percent    |                               |                                        |
| <b>Cut Flowers</b>                                      |                     |            |             |            |                               | <b>286,755</b>                         |
| Alstroemeria                                            | 48                  | Stems      | 16,179      | 98         | 0.16                          | 2,572                                  |
| Carnations, Standard                                    | 32                  | Stems      | 21,961      | 98         | 0.15                          | 3,228                                  |
| Chrysanthemums, Pompon                                  | 33                  | Bunches    | 12,169      | 99         | 1.28                          | 15,576                                 |
| Delphinium and Larkspur                                 | 63                  | Stems      | 40,613      | 100        | 0.23                          | 9,138                                  |
| Gerbera Daisy                                           | 29                  | Stems      | 70,310      | 100        | 0.30                          | 21,093                                 |
| Gladioli                                                | 26                  | Spikes     | 11,897      | 100        | 0.36                          | 4,307                                  |
| Iris                                                    | 48                  | Stems      | 67,575      | 100        | 0.23                          | 15,407                                 |
| Lilies, All                                             | 55                  | Stems      | 76,927      | 99         | 0.64                          | 49,233                                 |
| Lisianthus                                              | 42                  | Stems      | 17,678      | 99         | 0.44                          | 7,814                                  |
| Orchids, All                                            | 13                  | Blooms     | 7,132       | 100        | 0.73                          | 5,192                                  |
| Roses, All                                              | 51                  | Stems      | 114,730     | 99         | 0.32                          | 36,943                                 |
| Snapdragons                                             | 61                  | Spikes     | 45,604      | 98         | 0.23                          | 10,626                                 |
| Tulips                                                  | 34                  | Stems      | 34,346      | 99         | 0.39                          | 13,223                                 |
| Other Cut Flowers                                       | 177                 | ---        | ---         | 92         | ---                           | 92,403                                 |
| <b>Potted Flowering Plants</b>                          |                     |            |             |            |                               | <b>213,163</b>                         |
| African Violets                                         | 13                  | Pots       | 1,621       | 100        | 1.70                          | 2,756                                  |
| Finished Florist Azaleas                                | 24                  | Pots       | 2,425       | 98         | 5.22                          | 12,649                                 |
| Florist Chrysanthemums                                  | 21                  | Pots       | 7,175       | 100        | 2.79                          | 19,990                                 |
| Easter Lilies                                           | 32                  | Pots       | 1,527       | 99         | 4.06                          | 6,198                                  |
| Orchids                                                 | 44                  | Pots       | 4,722       | 91         | 9.29                          | 43,870                                 |
| Poinsettias                                             | 92                  | Pots       | 9,982       | 93         | 4.10                          | 40,933                                 |
| Spring Flowering Bulbs                                  | 37                  | Pots       | 3,274       | 100        | 2.85                          | 9,342                                  |
| Other Potted Flowering Plants                           | 81                  | Pots       | 20,509      | 100        | 3.29                          | 77,425                                 |
| <b>Foliage Plants for Indoor or Patio Use</b>           |                     |            |             |            |                               | <b>96,613</b>                          |
| Hanging Baskets                                         | 63                  | Baskets    | 5008        | 100        | 3.24                          | 16,226                                 |
| Potted Foliage                                          | 109                 | ---        | ---         | 97         | ---                           | 80,387                                 |
| <b>Annual Bedding/Garden Plants</b>                     |                     |            |             |            |                               | <b>303,108</b>                         |
| Flats                                                   |                     |            |             |            |                               |                                        |
| Begonias                                                | 49                  | Flats      | 491         | 98         | 9.22                          | 4,527                                  |
| Geraniums (Cutting)                                     | 21                  | Flats      | 197         | 98         | 11.38                         | 2,242                                  |
| Geraniums (Seed)                                        | 8                   | Flats      | 18          | 100        | 9.35                          | 168                                    |
| New Guinea Impatiens                                    | 13                  | Flats      | 78          | 96         | 12.42                         | 969                                    |
| Impatiens                                               | 61                  | Flats      | 2,360       | 99         | 9.25                          | 21,830                                 |
| Marigolds                                               | 55                  | Flats      | 1,747       | 99         | 8.81                          | 15,391                                 |
| Pansy/Viola                                             | 56                  | Flats      | 2,185       | 99         | 9.01                          | 19,687                                 |
| Petunias                                                | 65                  | Flats      | 2,095       | 98         | 9.18                          | 19,232                                 |
| Other Flowering and Foliar                              | 67                  | Flats      | 7,854       | 99         | 8.83                          | 69,351                                 |
| Vegetable Type                                          | 47                  | Flats      | 1,733       | 100        | 9.59                          | 16,626                                 |
| Potted                                                  |                     |            |             |            |                               |                                        |
| Begonias                                                | 52                  | Pots       | 1,960       | 77         | 1.11                          | 2,182                                  |
| Geraniums (Cutting)                                     | 45                  | Pots       | 7,394       | 99         | 1.23                          | 9,096                                  |
| Geraniums (Seed)                                        | 25                  | Pots       | 2,178       | 100        | 1.15                          | 2,513                                  |
| New Guinea Impatiens                                    | 48                  | Pots       | 2,331       | 99         | 1.53                          | 3,559                                  |
| Impatiens                                               | 57                  | Pots       | 5,913       | 90         | 0.83                          | 4,897                                  |
| Marigolds                                               | 39                  | Pots       | 1,667       | 91         | 0.85                          | 1,419                                  |
| Pansy/Viola                                             | 42                  | Pots       | 3,585       | 90         | 0.79                          | 2,841                                  |
| Petunias                                                | 43                  | Pots       | 3,495       | 96         | 0.99                          | 3,476                                  |
| Other Flowering and Foliar                              | 68                  | Pots       | 31,801      | 97         | 1.26                          | 39,938                                 |
| Vegetable Type                                          | 42                  | Pots       | 6,606       | 98         | 0.96                          | 6,363                                  |
| Hanging Baskets                                         |                     |            |             |            |                               |                                        |
| Begonias                                                | 18                  | Baskets    | 20          | 90         | 7.00                          | 140                                    |
| Geraniums (Cutting)                                     | 27                  | Baskets    | 142         | 98         | 6.99                          | 993                                    |
| Geraniums (Seed)                                        | 6                   | Baskets    | 16          | 94         | 7.29                          | 117                                    |
| New Guinea Impatiens                                    | 29                  | Baskets    | 177         | 99         | 6.22                          | 1,101                                  |
| Impatiens                                               | 25                  | Baskets    | 100         | 98         | 6.03                          | 603                                    |
| Petunias                                                | 21                  | Baskets    | 36          | 93         | 5.79                          | 208                                    |
| Other Flowering                                         | 35                  | Baskets    | 588         | 99         | 7.88                          | 4,633                                  |
| Herbaceous Perennials 3/<br>Hardy/Garden Chrysanthemums | 39                  | Pots       | 5,041       | 100        | 1.27                          | 6,385                                  |
| Hosta                                                   | 22                  | Pots       | 190         | 73         | 3.46                          | 657                                    |
| Other                                                   | 77                  | Pots       | 20,144      | 97         | 2.08                          | 41,964                                 |
| <b>Total Cut Cultivated Greens 4/</b>                   | <b>42</b>           | <b>---</b> | <b>---</b>  | <b>100</b> | <b>---</b>                    | <b>17,375</b>                          |
| <b>Propagative (Unfinished)</b>                         |                     |            |             |            |                               | <b>68,781</b>                          |
| Cut Flowers                                             | ---                 | ---        | ---         | ---        | ---                           | 6,688                                  |
| Potted Flowering Plants                                 | ---                 | ---        | ---         | ---        | ---                           | 18,694                                 |
| Bedding/Garden Plants                                   | ---                 | ---        | ---         | ---        | ---                           | 35,628                                 |
| Herbaceous Perennial Plants                             | ---                 | ---        | ---         | ---        | ---                           | 4,397                                  |
| Foliage Plants                                          | ---                 | ---        | ---         | ---        | ---                           | 3,374                                  |
| <b>TOTAL ALL PLANTS</b>                                 | <b>---</b>          | <b>---</b> | <b>---</b>  | <b>---</b> | <b>---</b>                    | <b>985,795</b>                         |

1/ The total covered growing area of 125,174,000 square feet consisted of the following: 22,860,000 square feet of shade and temporary cover; 17,329,000 square feet of glass; 30,288,000 square feet of fiberglass and other rigid greenhouses; 54,697,000 square feet of film plastic (single/multi) greenhouses; and 7,610,000 open ground.

2/ For potted plants, price represents a weighted average for plants sold in pots less than 5 inches and in pots 5 inches or more.

3/ Pot price is a weighted average of all pots to avoid disclosure of individual operations.

4/ Total includes Leatherleaf Ferns, which are not published to avoid disclosure of individual operations.





# California Fruit and Nut Crops

California accounts for 41 percent of the national fruit and nut production and 62 percent of the national value of fruit and nut crops. In 2002, the state produced 14.4 million tons of fruit and nuts, representing a 6 percent increase over 2001. The state's total production value in 2002 was \$7.89 billion, up 13 percent from the previous year.

Grapes continue to be the top-valued fruit and nut crop with \$2.58 billion, despite a decline of 3 percent from 2001. Crops with record production in 2002 were almonds, cherries, pistachios and strawberries. California accounts for nearly all the national production of almonds, dates, figs, grapes for raisins, kiwifruit, nectarines, olives, Clingstone peaches, pistachios, dried plums (prunes) and walnuts.

## Significant Increases in Production:

|                       |     |
|-----------------------|-----|
| Almonds               | 31% |
| Dates                 | 23% |
| Figs                  | 33% |
| Grapes, Raisin        | 28% |
| Peaches, Clingstone   | 18% |
| Pistachios            | 88% |
| Plums, Dried (Prunes) | 14% |
| Strawberries          | 24% |

## Notable Decreases in Production:

|                 |     |
|-----------------|-----|
| Apples          | 10% |
| Avocados        | 6%  |
| Boysenberries   | 12% |
| Lemons          | 19% |
| Olives          | 23% |
| Oranges, Navels | 10% |
| Pears, Bartlett | 16% |
| Walnuts         | 8%  |

In January, the season started with cooler temperatures and above normal rainfall in the Sacramento and San Joaquin valleys, but below normal precipitation in the coastal and southern California areas. Growers performed the needed orchard and vineyard activities such as pruning, spraying, fertilizing, brush shredding, and preparing for new tree plantings when conditions permitted. The cold weather late in January helped ease growers' concerns over the lack of chilling hours required for most tree fruit. Almonds began blooming in late February and were in full bloom by early March. A freeze in mid-March damaged the almonds in the Sacramento Valley and the crop was reduced significantly in the Arbuckle area. Warmer weather in March and April also accelerated growth and pollination in orchards and vineyards. Thinning was active in the stone fruit during April and May.

Temperatures during the summer months were relatively mild with no extreme temperatures. The fruit and nut crops developed normally. Even with the frost that damaged the almond crop in the Arbuckle area of the Sacramento Valley, the production hit a record 1.09 billion pounds, 31 percent higher than the previous record set in 1999.

The weather during the fall months was also mild and allowed the harvest of fruit and nut crops with few problems. Most fruit and nuts had good quality.

The 2001-2002 Navel orange crop experienced a very low set per tree, but the fruit sizes were large and quality was good. The Valencia crop had a higher set than the previous year and production was up 3 percent. California's grapefruit crop had generally good quality with smooth texture. The lemon season progressed normally with good quality reported and normal shaped fruit. However, heat in the major producing areas during bloom resulted in a low set and production dropped 19 percent below the previous year. The tangerine crop experienced good color and quality.

### Berry Acreage, Production and Value, 1993-2002

| Crop                       | Crop Year | Harvested    | Yield Per Acre | Production        | Value Per Cwt. 1/ | Total Value    |
|----------------------------|-----------|--------------|----------------|-------------------|-------------------|----------------|
|                            |           | <i>Acres</i> | <i>Cwt.</i>    | <i>1,000 Cwt.</i> | <i>Dollars</i>    | <i>\$1,000</i> |
| Boysenberries              | 1993      | 250          | 90             | 23                | 88.00             | 1,980          |
|                            | 1994      | 250          | 80             | 20                | 75.50             | 1,510          |
|                            | 1995      | 270          | 67             | 18                | 95.00             | 1,710          |
|                            | 1996      | 270          | 89             | 24                | 93.70             | 2,248          |
|                            | 1997      | 270          | 91             | 25                | 66.70             | 1,642          |
|                            | 1998      | 250          | 70             | 18                | 79.20             | 1,386          |
|                            | 1999      | 300          | 93             | 28                | 82.40             | 2,308          |
|                            | 2000      | 260          | 96             | 25                | 82.40             | 2,061          |
|                            | 2001      | 230          | 83             | 19                | 81.60             | 1,550          |
|                            | 2002      | 210          | 80             | 17                | 81.70             | 1,372          |
| Raspberries                | 1993      | 1,850        | 142            | 263               | 148.00            | 39,000         |
|                            | 1994      | 1,900        | 111            | 210               | 143.00            | 30,000         |
|                            | 1995      | 1,900        | 81             | 153               | 152.00            | 23,325         |
|                            | 1996      | 1,800        | 83             | 149               | 171.00            | 25,520         |
|                            | 1997      | 1,700        | 85             | 145               | 139.00            | 20,225         |
|                            | 1998      | 1,700        | 87             | 148               | 192.00            | 28,470         |
|                            | 1999      | 1,800        | 116            | 208               | 147.00            | 30,604         |
|                            | 2000      | 2,000        | 113            | 226               | 190.00            | 42,940         |
|                            | 2001      | 2,300        | 109            | 250               | 166.00            | 41,500         |
|                            | 2002      | 2,400        | 122            | 292               | 140.00            | 40,851         |
| Strawberries, Fresh Market | 1993      | ---          | ---            | 7,736             | 46.80             | 362,045        |
|                            | 1994      | ---          | ---            | 9,016             | 59.10             | 532,846        |
|                            | 1995      | ---          | ---            | 9,048             | 57.40             | 519,355        |
|                            | 1996      | ---          | ---            | 9,989             | 52.50             | 524,423        |
|                            | 1997      | ---          | ---            | 9,618             | 61.40             | 590,545        |
|                            | 1998      | ---          | ---            | 9,086             | 68.70             | 624,208        |
|                            | 1999      | ---          | ---            | 10,603            | 71.30             | 755,994        |
|                            | 2000      | ---          | ---            | 11,518            | 61.40             | 707,205        |
|                            | 2001      | ---          | ---            | 10,338            | 70.60             | 729,863        |
|                            | 2002      | ---          | ---            | 12,642            | 67.40             | 852,071        |
| Strawberries, Processing   | 1993      | ---          | ---            | 3,685             | 26.00             | 95,810         |
|                            | 1994      | ---          | ---            | 4,265             | 26.90             | 114,729        |
|                            | 1995      | ---          | ---            | 3,932             | 23.40             | 92,003         |
|                            | 1996      | ---          | ---            | 3,619             | 16.70             | 60,437         |
|                            | 1997      | ---          | ---            | 3,716             | 25.80             | 95,873         |
|                            | 1998      | ---          | ---            | 4,466             | 29.70             | 132,640        |
|                            | 1999      | ---          | ---            | 4,748             | 31.20             | 148,138        |
|                            | 2000      | ---          | ---            | 4,214             | 22.10             | 93,129         |
|                            | 2001      | ---          | ---            | 3,390             | 28.50             | 96,615         |
|                            | 2002      | ---          | ---            | 4,315             | 32.10             | 138,512        |
| Strawberries, All          | 1993      | 25,100       | 455            | 11,421            | 40.10             | 457,855        |
|                            | 1994      | 23,300       | 570            | 13,281            | 48.80             | 647,575        |
|                            | 1995      | 23,600       | 550            | 12,980            | 47.10             | 611,358        |
|                            | 1996      | 25,200       | 540            | 13,608            | 43.00             | 584,860        |
|                            | 1997      | 22,600       | 590            | 13,334            | 51.50             | 686,418        |
|                            | 1998      | 24,200       | 560            | 13,552            | 55.80             | 756,848        |
|                            | 1999      | 25,800       | 595            | 15,351            | 58.90             | 904,132        |
|                            | 2000      | 27,600       | 570            | 15,732            | 50.90             | 800,334        |
|                            | 2001      | 26,400       | 520            | 13,728            | 60.20             | 826,478        |
|                            | 2002      | 28,500       | 595            | 16,957            | 58.40             | 990,583        |

1/ The processed value is based on equivalent returns at the processing plant door. The fresh market value is on a packed and loaded basis, F.O.B. shipping point.

**Strawberry Monthly and Season Average Prices, 1993-2002 1/**

| Fresh Sales | Crop Year | Jan.                    | Feb.   | Mar.   | Apr.  | May   | June  | July  | Aug.  | Sept. | Oct.  | Nov.   | Dec. | Season Average |
|-------------|-----------|-------------------------|--------|--------|-------|-------|-------|-------|-------|-------|-------|--------|------|----------------|
|             |           | <i>Dollars Per Cwt.</i> |        |        |       |       |       |       |       |       |       |        |      |                |
|             | 1993      | 102.00                  | 80.20  | 57.70  | 42.40 | 38.30 | 42.50 | 31.60 | 46.90 | 48.90 | 64.20 | 93.70  | ---  | 46.80          |
|             | 1994      | 77.90                   | 99.00  | 94.40  | 57.50 | 56.40 | 50.40 | 49.30 | 49.00 | 46.60 | 82.40 | 89.90  | ---  | 59.10          |
|             | 1995      | 65.50                   | 67.00  | 65.50  | 57.60 | 66.90 | 53.10 | 50.70 | 63.30 | 41.50 | 49.70 | 115.00 | ---  | 57.40          |
|             | 1996      | ---                     | 80.30  | 76.70  | 38.50 | 45.60 | 65.00 | 44.10 | 54.80 | 61.50 | 40.70 | ---    | ---  | 52.50          |
|             | 1997      | 116.00                  | 98.30  | 85.80  | 42.70 | 54.30 | 74.80 | 56.20 | 53.10 | 67.50 | 69.80 | ---    | ---  | 61.40          |
|             | 1998      | 120.00                  | 147.00 | 86.50  | 67.50 | 67.40 | 54.60 | 56.30 | 65.00 | 59.00 | 80.20 | 116.00 | ---  | 68.70          |
|             | 1999      | 167.00                  | 148.00 | 125.00 | 88.20 | 61.00 | 62.60 | 57.90 | 66.20 | 58.30 | 45.60 | 79.00  | ---  | 71.30          |
|             | 2000      | 95.80                   | 107.00 | 75.70  | 68.90 | 46.10 | 58.20 | 56.80 | 49.60 | 62.20 | 95.40 | ---    | ---  | 61.40          |
|             | 2001      | 153.00                  | 125.00 | 96.10  | 75.70 | 51.60 | 61.50 | 68.70 | 87.40 | 78.10 | 80.70 | 96.40  | ---  | 70.60          |
|             | 2002      | 185.00                  | 133.00 | 96.70  | 60.00 | 63.40 | 57.30 | 53.10 | 82.60 | 58.40 | 68.40 | 108.00 | ---  | 67.40          |

1/ Prices are F.O.B. shipping point.

**Citrus Acreage, Production and Value, 1993-2002**

| Crop                                                                                                                   | Crop Year | Bearing      | Non-Bearing 1/ | Yield Per Acre | Production           | Value Per Unit 2/ | Total Value    |
|------------------------------------------------------------------------------------------------------------------------|-----------|--------------|----------------|----------------|----------------------|-------------------|----------------|
|                                                                                                                        |           | <i>Acres</i> | <i>Acres</i>   | <i>Cartons</i> | <i>1,000 Cartons</i> | <i>Dollars</i>    | <i>\$1,000</i> |
| Grapefruit, All<br>(Net weight<br>per carton: 33.5 pounds)                                                             | 92-93     | 17,800       | 2,600          | 1,034          | 18,400               | 2.46              | 45,089         |
|                                                                                                                        | 93-94     | 18,000       | ---            | 1,034          | 18,600               | 2.72              | 50,579         |
|                                                                                                                        | 94-95     | 18,400       | ---            | 1,010          | 18,600               | 2.82              | 52,420         |
|                                                                                                                        | 95-96     | 18,800       | ---            | 862            | 16,200               | 3.29              | 53,277         |
|                                                                                                                        | 96-97     | 18,000       | ---            | 912            | 16,400               | 3.21              | 52,679         |
|                                                                                                                        | 97-98     | 16,800       | 1,800          | 952            | 16,000               | 4.21              | 67,330         |
|                                                                                                                        | 98-99     | 16,600       | ---            | 880            | 14,600               | 5.37              | 78,309         |
|                                                                                                                        | 99-00     | 16,600       | ---            | 868            | 14,400               | 4.09              | 58,798         |
|                                                                                                                        | 00-01     | 15,400       | ---            | 818            | 12,600               | 4.39              | 55,242         |
|                                                                                                                        | 01-02     | 14,000       | ---            | 842            | 11,800               | 4.03              | 47,485         |
| Lemons<br>(Net weight<br>per carton: 38 pounds)                                                                        | 92-93     | 46,400       | 2,100          | 880            | 40,800               | 4.97              | 202,827        |
|                                                                                                                        | 93-94     | 45,500       | ---            | 910            | 41,400               | 5.00              | 207,020        |
|                                                                                                                        | 94-95     | 45,700       | ---            | 876            | 40,000               | 5.66              | 226,120        |
|                                                                                                                        | 95-96     | 46,400       | ---            | 906            | 42,000               | 5.20              | 218,544        |
|                                                                                                                        | 96-97     | 47,400       | ---            | 954            | 45,200               | 6.06              | 274,125        |
|                                                                                                                        | 97-98     | 48,700       | 6,500          | 862            | 42,000               | 5.16              | 216,659        |
|                                                                                                                        | 98-99     | 48,500       | ---            | 668            | 32,400               | 6.39              | 207,098        |
|                                                                                                                        | 99-00     | 48,500       | ---            | 784            | 38,000               | 6.68              | 253,876        |
|                                                                                                                        | 00-01     | 49,500       | ---            | 914            | 45,200               | 4.71              | 212,725        |
|                                                                                                                        | 01-02     | 49,500       | ---            | 740            | 36,600               | 7.84              | 287,026        |
| Oranges, Navel and Misc.<br>(Net weight<br>per carton: 37.5 pounds)                                                    | 92-93     | 114,000      | 10,600         | 768            | 87,600               | 3.16              | 277,008        |
|                                                                                                                        | 93-94     | 114,000      | ---            | 642            | 73,200               | 3.99              | 291,807        |
|                                                                                                                        | 94-95     | 118,000      | ---            | 594            | 70,000               | 3.91              | 273,750        |
|                                                                                                                        | 95-96     | 121,000      | ---            | 628            | 76,000               | 3.68              | 279,300        |
|                                                                                                                        | 96-97     | 124,000      | ---            | 646            | 80,000               | 4.68              | 373,890        |
|                                                                                                                        | 97-98     | 127,000      | 8,300          | 692            | 88,000               | 4.42              | 388,870        |
|                                                                                                                        | 98-99     | 128,000      | ---            | 328            | 42,000               | 5.23              | 219,640        |
|                                                                                                                        | 99-00     | 126,000      | ---            | 634            | 80,000               | 3.28              | 262,160        |
|                                                                                                                        | 00-01     | 128,000      | ---            | 554            | 71,000               | 4.99              | 354,320        |
|                                                                                                                        | 01-02     | 128,000      | ---            | 500            | 64,000               | 6.44              | 412,305        |
| Oranges, Valencia<br>(Net weight<br>per carton: 37.5 pounds)                                                           | 92-93     | 70,000       | 6,000          | 658            | 46,000               | 4.24              | 195,002        |
|                                                                                                                        | 93-94     | 71,000       | ---            | 760            | 54,000               | 3.16              | 170,760        |
|                                                                                                                        | 94-95     | 73,000       | ---            | 576            | 42,000               | 4.74              | 199,042        |
|                                                                                                                        | 95-96     | 75,000       | ---            | 533            | 40,000               | 5.26              | 210,190        |
|                                                                                                                        | 96-97     | 76,000       | ---            | 632            | 48,000               | 4.39              | 210,370        |
|                                                                                                                        | 97-98     | 73,200       | 4,800          | 684            | 50,000               | 4.52              | 225,740        |
|                                                                                                                        | 98-99     | 73,500       | ---            | 408            | 30,000               | 6.14              | 184,210        |
|                                                                                                                        | 99-00     | 69,500       | ---            | 690            | 48,000               | 1.74              | 83,494         |
|                                                                                                                        | 00-01     | 66,500       | ---            | 572            | 38,000               | 4.22              | 160,140        |
|                                                                                                                        | 01-02     | 65,000       | ---            | 600            | 39,000               | 3.76              | 146,538        |
| Oranges, All<br>(Net weight<br>per carton: 37.5 pounds)                                                                | 92-93     | 184,000      | 16,600         | 726            | 133,600              | 3.54              | 472,010        |
|                                                                                                                        | 93-94     | 185,000      | ---            | 688            | 127,200              | 3.64              | 462,567        |
|                                                                                                                        | 94-95     | 191,000      | ---            | 586            | 112,000              | 4.22              | 472,792        |
|                                                                                                                        | 95-96     | 196,000      | ---            | 592            | 116,000              | 4.22              | 489,490        |
|                                                                                                                        | 96-97     | 200,000      | ---            | 640            | 128,000              | 4.57              | 584,260        |
|                                                                                                                        | 97-98     | 200,200      | 13,100         | 690            | 138,000              | 4.46              | 614,610        |
|                                                                                                                        | 98-99     | 201,500      | ---            | 358            | 72,000               | 5.61              | 403,850        |
|                                                                                                                        | 99-00     | 195,500      | ---            | 654            | 128,000              | 2.70              | 345,654        |
|                                                                                                                        | 00-01     | 194,500      | ---            | 560            | 109,000              | 4.72              | 514,460        |
|                                                                                                                        | 01-02     | 193,000      | ---            | 534            | 103,000              | 5.43              | 558,843        |
| Tangerines<br>(Including Mandarins and<br>Hybrids, Tangelos and<br>Tangors)<br>(Net weight<br>per carton: 37.5 pounds) | 92-93     | 7,700        | 1,300          | 546            | 4,200                | 6.00              | 25,186         |
|                                                                                                                        | 93-94     | 8,000        | ---            | 576            | 4,600                | 5.58              | 25,651         |
|                                                                                                                        | 94-95     | 8,600        | ---            | 582            | 5,000                | 7.09              | 35,452         |
|                                                                                                                        | 95-96     | 8,800        | ---            | 590            | 5,200                | 5.42              | 28,184         |
|                                                                                                                        | 96-97     | 8,700        | ---            | 598            | 5,200                | 7.56              | 39,298         |
|                                                                                                                        | 97-98     | 8,800        | 1,900          | 546            | 4,800                | 5.74              | 27,530         |
|                                                                                                                        | 98-99     | 8,600        | ---            | 348            | 3,000                | 7.34              | 22,023         |
|                                                                                                                        | 99-00     | 8,600        | ---            | 582            | 5,000                | 5.55              | 27,759         |
|                                                                                                                        | 00-01     | 8,800        | ---            | 500            | 4,400                | 7.08              | 31,137         |
|                                                                                                                        | 01-02     | 9,000        | ---            | 488            | 4,400                | 8.83              | 38,821         |

1/ Non-bearing shown only in years acreage surveys were conducted.

2/ Equivalent packinghouse door returns.

**Citrus Sales by Utilization and Value Per Carton, 1993-2002**

| Crop                     | Crop Year | All Sales     |           | Fresh Market  |           | Processing    |           |
|--------------------------|-----------|---------------|-----------|---------------|-----------|---------------|-----------|
|                          |           | Quantity      | Value 1/  | Quantity      | Value 1/  | Quantity      | Value 1/  |
|                          |           | 1,000 Cartons | \$/Carton | 1,000 Cartons | \$/Carton | 1,000 Cartons | \$/Carton |
| Grapefruit, All 2/       |           |               |           |               |           |               |           |
| (Net weight              | 92-93     | 18,400        | 2.46      | 11,400        | 4.08      | 7,000         | (0.17)    |
| per carton: 33.5 pounds) | 93-94     | 18,600        | 2.72      | 12,160        | 4.16      | 6,440         | (0.01)    |
|                          | 94-95     | 18,600        | 2.82      | 11,820        | 4.56      | 6,780         | (0.22)    |
|                          | 95-96     | 16,200        | 3.29      | 12,000        | 4.48      | 4,200         | (0.12)    |
|                          | 96-97     | 16,400        | 3.21      | 12,120        | 4.38      | 4,280         | (0.10)    |
|                          | 97-98     | 16,000        | 4.21      | 11,088        | 6.13      | 4,912         | (0.13)    |
|                          | 98-99     | 14,600        | 5.37      | 13,276        | 5.91      | 1,324         | (0.07)    |
|                          | 99-00     | 14,400        | 4.09      | 12,400        | 4.80      | 2,000         | (0.33)    |
|                          | 00-01     | 12,600        | 4.39      | 10,800        | 5.14      | 1,800         | (0.12)    |
|                          | 01-02     | 11,800        | 4.03      | 10,200        | 4.68      | 1,600         | (0.13)    |
| Lemons                   |           |               |           |               |           |               |           |
| (Net weight              | 92-93     | 40,800        | 4.97      | 19,800        | 9.22      | 21,000        | 0.97      |
| per carton: 38 pounds)   | 93-94     | 41,400        | 5.00      | 19,000        | 10.10     | 22,400        | 0.68      |
|                          | 94-95     | 40,000        | 5.66      | 21,800        | 9.93      | 18,200        | 0.53      |
|                          | 95-96     | 42,000        | 5.20      | 21,600        | 9.23      | 20,400        | 0.94      |
|                          | 96-97     | 45,200        | 6.06      | 23,080        | 10.43     | 22,120        | 1.51      |
|                          | 97-98     | 42,000        | 5.16      | 19,840        | 9.58      | 22,160        | 1.20      |
|                          | 98-99     | 32,400        | 6.39      | 19,570        | 10.33     | 12,830        | 0.39      |
|                          | 99-00     | 38,000        | 6.68      | 23,200        | 10.49     | 14,800        | 0.71      |
|                          | 00-01     | 45,200        | 4.71      | 23,020        | 9.00      | 22,180        | 0.25      |
|                          | 01-02     | 36,600        | 7.84      | 25,040        | 11.41     | 11,560        | 0.13      |
| Oranges, Navel and Misc. |           |               |           |               |           |               |           |
| (Net weight              | 92-93     | 87,600        | 3.16      | 65,400        | 4.30      | 22,200        | (0.18)    |
| per carton: 37.5 pounds) | 93-94     | 73,200        | 3.99      | 58,200        | 5.01      | 15,000        | 0.02      |
|                          | 94-95     | 70,000        | 3.91      | 53,000        | 5.21      | 17,000        | (0.14)    |
|                          | 95-96     | 76,000        | 3.68      | 58,000        | 4.89      | 18,000        | (0.24)    |
|                          | 96-97     | 80,000        | 4.68      | 69,000        | 5.39      | 11,000        | 0.18      |
|                          | 97-98     | 88,000        | 4.42      | 73,000        | 5.29      | 15,000        | 0.18      |
|                          | 98-99     | 42,000        | 5.23      | 23,000        | 9.41      | 19,000        | 0.18      |
|                          | 99-00     | 80,000        | 3.28      | 62,000        | 4.24      | 18,000        | (0.04)    |
|                          | 00-01     | 71,000        | 4.99      | 61,000        | 5.82      | 10,000        | (0.07)    |
|                          | 01-02     | 64,000        | 6.44      | 55,800        | 7.40      | 8,200         | (0.08)    |
| Oranges, Valencia        |           |               |           |               |           |               |           |
| (Net weight              | 92-93     | 46,000        | 4.24      | 32,800        | 5.92      | 13,200        | 0.08      |
| per carton: 37.5 pounds) | 93-94     | 54,000        | 3.16      | 34,000        | 5.04      | 20,000        | (0.03)    |
|                          | 94-95     | 42,000        | 4.74      | 35,200        | 5.70      | 6,800         | (0.24)    |
|                          | 95-96     | 40,000        | 5.26      | 31,000        | 6.85      | 9,000         | (0.24)    |
|                          | 96-97     | 48,000        | 4.39      | 34,000        | 5.65      | 14,000        | 1.31      |
|                          | 97-98     | 50,000        | 4.52      | 38,000        | 5.50      | 12,000        | 1.40      |
|                          | 98-99     | 30,000        | 6.14      | 16,000        | 10.21     | 14,000        | 1.50      |
|                          | 99-00     | 48,000        | 1.74      | 25,400        | 3.35      | 22,600        | (0.07)    |
|                          | 00-01     | 38,000        | 4.22      | 31,000        | 5.08      | 7,000         | 0.38      |
|                          | 01-02     | 39,000        | 3.76      | 32,700        | 4.41      | 6,300         | 0.37      |
| Oranges, All             |           |               |           |               |           |               |           |
| (Net weight              | 92-93     | 133,600       | 3.54      | 98,200        | 4.84      | 35,400        | (0.08)    |
| per carton: 37.5 pounds) | 93-94     | 127,200       | 3.64      | 92,200        | 5.02      | 35,000        | (0.01)    |
|                          | 94-95     | 112,000       | 4.22      | 88,200        | 5.41      | 23,800        | (0.17)    |
|                          | 95-96     | 116,000       | 4.22      | 89,000        | 5.58      | 27,000        | (0.24)    |
|                          | 96-97     | 128,000       | 4.57      | 103,000       | 5.48      | 25,000        | 0.81      |
|                          | 97-98     | 138,000       | 4.46      | 111,000       | 5.36      | 27,000        | 0.72      |
|                          | 98-99     | 72,000        | 5.61      | 39,000        | 9.74      | 33,000        | 0.74      |
|                          | 99-00     | 128,000       | 2.70      | 87,400        | 3.98      | 40,600        | (0.06)    |
|                          | 00-01     | 109,000       | 4.72      | 92,000        | 5.57      | 17,000        | 0.12      |
|                          | 01-02     | 103,000       | 5.43      | 88,500        | 6.30      | 14,500        | 0.12      |
| Tangerines               |           |               |           |               |           |               |           |
| (Including Mandarins and | 92-93     | 4,200         | 6.00      | 2,930         | 8.72      | 1,270         | (0.28)    |
| Hybrids, Tangelos and    | 93-94     | 4,600         | 5.58      | 3,200         | 8.04      | 1,400         | (0.06)    |
| Tangors)                 | 94-95     | 5,000         | 7.09      | 3,400         | 10.50     | 1,600         | (0.16)    |
| (Net weight              | 95-96     | 5,200         | 5.42      | 3,600         | 7.90      | 1,600         | (0.16)    |
| per carton: 37.5 pounds) | 96-97     | 5,200         | 7.56      | 4,240         | 9.30      | 960           | (0.14)    |
|                          | 97-98     | 4,800         | 5.74      | 3,296         | 8.35      | 1,504         | 0.01      |
|                          | 98-99     | 3,000         | 7.34      | 2,126         | 10.16     | 874           | 0.50      |
|                          | 99-00     | 5,000         | 5.55      | 3,400         | 8.20      | 1,600         | (0.07)    |
|                          | 00-01     | 4,400         | 7.08      | 3,420         | 9.13      | 980           | (0.09)    |
|                          | 01-02     | 4,400         | 8.83      | 3,940         | 9.81      | 460           | 0.37      |

1/ Equivalent packinghouse door returns.

2/ Estimates for "Grapefruit, Desert" and "Grapefruit, Other" were combined to "Grapefruit, All" starting in 1995-96. Season average values for all grapefruit are derived by weighting the season average value for each area by their carton weights. Prior to 1993-94, net weight per carton for Desert Valley was 32 pounds.

**Citrus Monthly and Season Average Prices, 1993-2002**

| Crop                                | Crop Year | Nov.               | Dec.   | Jan.   | Feb.   | Mar.   | Apr.   | May    | June   | July   | Aug.   | Sept.  | Oct.   | Season Average |
|-------------------------------------|-----------|--------------------|--------|--------|--------|--------|--------|--------|--------|--------|--------|--------|--------|----------------|
|                                     |           | Dollars Per Carton |        |        |        |        |        |        |        |        |        |        |        |                |
| Grapefruit, All Fresh Sales         | 92-93     | 5.59               | 4.65   | 4.21   | 3.27   | 2.95   | 3.05   | 2.80   | 4.07   | 4.69   | 4.68   | 5.74   | 4.70   | 4.08           |
|                                     | 93-94     | 6.70               | 3.55   | 3.39   | 2.73   | 2.58   | 2.50   | 3.56   | 4.86   | 4.56   | 4.70   | 4.81   | 4.71   | 4.16           |
|                                     | 94-95     | 5.08               | 3.60   | 3.79   | 2.83   | 2.92   | 3.05   | 3.62   | 4.88   | 5.45   | 5.48   | 4.78   | 5.98   | 4.56           |
|                                     | 95-96     | 7.28               | 4.93   | 4.18   | 3.63   | 3.23   | 3.38   | 4.88   | 3.98   | 3.33   | 5.63   | 7.08   | 7.08   | 4.48           |
|                                     | 96-97     | 6.83               | 6.38   | 5.28   | 4.13   | 3.48   | 3.43   | 3.73   | 4.58   | 4.63   | 4.23   | 4.23   | 3.33   | 4.38           |
|                                     | 97-98     | 3.48               | 4.73   | 4.63   | 3.58   | 3.88   | 4.38   | 5.13   | 5.58   | 6.23   | 7.23   | 9.22   | 9.22   | 6.13           |
|                                     | 98-99     | 7.91               | 7.36   | 7.56   | 5.66   | 4.51   | 4.16   | 6.21   | 7.36   | 6.46   | 4.66   | 3.16   | 4.81   | 5.91           |
|                                     | 99-00     | 6.90               | 6.50   | 6.25   | 5.25   | 4.35   | 3.45   | 4.05   | 5.10   | 4.65   | 4.50   | 4.70   | 5.40   | 4.80           |
|                                     | 00-01     | 5.99               | 5.79   | 5.69   | 4.74   | 4.89   | 4.54   | 5.79   | 5.44   | 4.94   | 4.69   | 5.09   | 4.84   | 5.14           |
|                                     | 01-02     | 5.38               | 5.53   | 5.38   | 5.08   | 2.98   | 3.53   | 4.68   | 4.98   | 5.03   | 4.88   | 4.18   | 4.43   | 4.68           |
|                                     | 01-02     | 5.38               | 5.53   | 5.38   | 5.08   | 2.98   | 3.53   | 4.68   | 4.98   | 5.03   | 4.88   | 4.18   | 4.43   | 4.68           |
| Processing                          | 92-93     | 0.03               | (0.16) | (0.18) | (0.18) | (0.18) | (0.18) | (0.18) | (0.17) | (0.15) | (0.15) | ---    | ---    | (0.17)         |
|                                     | 93-94     | 0.18               | (0.03) | (0.03) | (0.02) | (0.01) | (0.03) | (0.03) | 0.05   | (0.01) | (0.04) | (0.04) | 0.07   | (0.01)         |
|                                     | 94-95     | (0.20)             | (0.22) | (0.22) | (0.22) | (0.22) | (0.21) | (0.19) | (0.22) | (0.22) | (0.22) | (0.22) | (0.22) | (0.22)         |
|                                     | 95-96     | (0.11)             | (0.11) | (0.11) | (0.11) | (0.11) | (0.11) | (0.11) | (0.11) | (0.11) | (0.11) | (0.14) | (0.14) | (0.12)         |
|                                     | 96-97     | (0.13)             | (0.13) | 0.09   | 0.10   | (0.10) | (0.18) | (0.15) | (0.09) | (0.07) | 0.01   | (0.12) | (0.20) | (0.10)         |
|                                     | 97-98     | (0.13)             | (0.13) | (0.13) | (0.13) | (0.13) | (0.13) | (0.13) | (0.13) | (0.13) | (0.13) | (0.15) | (0.15) | (0.13)         |
|                                     | 98-99     | (0.08)             | (0.16) | (0.05) | (0.08) | (0.16) | (0.16) | (0.10) | (0.03) | (0.03) | (0.03) | (0.03) | (0.03) | (0.07)         |
|                                     | 99-00     | (0.33)             | (0.33) | (0.33) | (0.33) | (0.33) | (0.33) | (0.33) | (0.33) | (0.33) | (0.33) | (0.33) | (0.33) | (0.33)         |
|                                     | 00-01     | (0.12)             | (0.12) | (0.12) | (0.12) | (0.12) | (0.12) | (0.12) | (0.12) | (0.12) | (0.12) | (0.12) | (0.12) | (0.12)         |
|                                     | 01-02     | (0.13)             | (0.13) | (0.13) | (0.13) | (0.13) | (0.13) | (0.13) | (0.13) | (0.13) | (0.13) | (0.13) | (0.13) | (0.13)         |
|                                     | 01-02     | (0.13)             | (0.13) | (0.13) | (0.13) | (0.13) | (0.13) | (0.13) | (0.13) | (0.13) | (0.13) | (0.13) | (0.13) | (0.13)         |
| All Sales                           | 92-93     | 5.09               | 4.04   | 3.57   | 2.53   | 1.98   | 1.52   | 1.21   | 2.09   | 3.15   | 2.65   | 5.74   | 4.70   | 2.46           |
|                                     | 93-94     | 4.78               | 3.28   | 8.08   | 1.98   | 1.75   | 1.76   | 2.23   | 2.71   | 3.10   | 2.75   | 3.60   | 1.81   | 2.72           |
|                                     | 94-95     | 3.95               | 3.15   | 3.44   | 1.88   | 1.72   | 2.05   | 1.87   | 2.85   | 2.59   | 3.83   | 3.25   | 5.08   | 2.82           |
|                                     | 95-96     | 6.07               | 4.65   | 3.23   | 2.96   | 2.29   | 2.21   | 3.66   | 3.24   | 2.52   | 3.16   | 4.98   | 6.00   | 3.29           |
|                                     | 96-97     | 6.40               | 5.70   | 4.36   | 3.18   | 2.28   | 2.11   | 1.98   | 3.37   | 4.37   | 2.88   | 2.75   | 1.85   | 3.21           |
|                                     | 97-98     | 2.96               | 4.12   | 4.05   | 2.79   | 2.66   | 2.58   | 2.62   | 3.31   | 4.34   | 5.43   | 7.78   | 7.96   | 4.21           |
|                                     | 98-99     | 6.90               | 6.52   | 6.64   | 4.63   | 3.79   | 2.97   | 6.06   | 7.04   | 5.97   | 4.14   | 2.90   | 3.62   | 5.37           |
|                                     | 99-00     | 5.93               | 6.01   | 5.62   | 4.85   | 4.19   | 3.31   | 3.57   | 4.37   | 3.87   | 3.40   | 4.17   | 4.53   | 4.09           |
|                                     | 00-01     | 5.05               | 5.30   | 5.06   | 4.33   | 4.69   | 4.35   | 5.09   | 4.68   | 4.14   | 3.58   | 4.53   | 4.07   | 4.39           |
|                                     | 01-02     | 4.54               | 5.17   | 4.83   | 4.83   | 2.89   | 3.41   | 4.12   | 4.29   | 4.25   | 3.75   | 3.73   | 3.74   | 4.03           |
|                                     | 01-02     | 4.54               | 5.17   | 4.83   | 4.83   | 2.89   | 3.41   | 4.12   | 4.29   | 4.25   | 3.75   | 3.73   | 3.74   | 4.03           |
| Crop                                | Crop Year | Oct.               | Nov.   | Dec.   | Jan.   | Feb.   | Mar.   | Apr.   | May    | June   | July   | Aug.   | Sept.  | Season Average |
|                                     |           | Dollars Per Carton |        |        |        |        |        |        |        |        |        |        |        |                |
| Oranges,Navel and Misc. Fresh Sales | 92-93     | 6.55               | 5.20   | 4.65   | 4.20   | 3.95   | 3.80   | 4.25   | 4.40   | 2.95   | ---    | ---    | ---    | 4.30           |
|                                     | 93-94     | 6.86               | 6.86   | 5.11   | 4.06   | 4.06   | 5.06   | 5.31   | 6.01   | ---    | ---    | ---    | ---    | 5.01           |
|                                     | 94-95     | 6.06               | 6.26   | 5.46   | 5.26   | 4.81   | 4.46   | 5.66   | 5.11   | ---    | ---    | ---    | ---    | 5.21           |
|                                     | 95-96     | ---                | 6.99   | 4.54   | 4.24   | 3.79   | 5.04   | 5.84   | 7.79   | ---    | ---    | ---    | ---    | 4.89           |
|                                     | 96-97     | 10.29              | 6.24   | 5.19   | 5.09   | 4.69   | 4.79   | 5.69   | 7.94   | ---    | ---    | ---    | ---    | 5.39           |
|                                     | 97-98     | 6.24               | 5.34   | 4.99   | 4.44   | 4.44   | 4.99   | 6.69   | 7.14   | 8.14   | ---    | ---    | ---    | 5.29           |
|                                     | 98-99     | ---                | 7.71   | 7.31   | 11.41  | 10.56  | 10.31  | 13.81  | 13.36  | ---    | ---    | ---    | ---    | 9.41           |
|                                     | 99-00     | ---                | 6.94   | 4.74   | 4.29   | 3.69   | 3.64   | 3.49   | 4.24   | 6.39   | ---    | ---    | ---    | 4.24           |
|                                     | 00-01     | 6.97               | 5.52   | 4.97   | 4.77   | 5.02   | 6.32   | 7.62   | 8.67   | 9.42   | ---    | ---    | ---    | 5.82           |
|                                     | 01-02     | ---                | 9.70   | 8.10   | 7.55   | 6.90   | 6.45   | 7.25   | 8.55   | ---    | ---    | ---    | ---    | 7.40           |
|                                     | 01-02     | ---                | 9.70   | 8.10   | 7.55   | 6.90   | 6.45   | 7.25   | 8.55   | ---    | ---    | ---    | ---    | 7.40           |
|                                     | 01-02     | ---                | 9.70   | 8.10   | 7.55   | 6.90   | 6.45   | 7.25   | 8.55   | ---    | ---    | ---    | ---    | 7.40           |
| Processing                          | 92-93     | (0.19)             | (0.19) | (0.19) | (0.19) | (0.19) | (0.19) | (0.19) | (0.10) | 0.18   | ---    | ---    | ---    | (0.18)         |
|                                     | 93-94     | (0.09)             | (0.18) | (0.18) | (0.14) | 0.09   | 0.18   | (0.01) | (0.01) | ---    | ---    | ---    | ---    | 0.02           |
|                                     | 94-95     | (0.12)             | (0.12) | (0.03) | (0.03) | (0.12) | (0.18) | (0.22) | (0.22) | ---    | ---    | ---    | ---    | (0.14)         |
|                                     | 95-96     | ---                | (0.24) | (0.24) | (0.24) | (0.24) | (0.24) | (0.24) | (0.24) | ---    | ---    | ---    | ---    | (0.24)         |
|                                     | 96-97     | (0.14)             | (0.14) | (0.14) | (0.04) | 0.30   | 0.32   | 0.32   | 0.33   | ---    | ---    | ---    | ---    | 0.18           |
|                                     | 97-98     | (0.14)             | (0.14) | (0.14) | (0.02) | 0.10   | 0.33   | 0.33   | 0.33   | 0.33   | ---    | ---    | ---    | 0.18           |
|                                     | 98-99     | ---                | 0.23   | 0.31   | 0.42   | 0.12   | (0.10) | (0.12) | 0.03   | ---    | ---    | ---    | ---    | 0.18           |
|                                     | 99-00     | ---                | (0.04) | (0.04) | (0.04) | (0.04) | (0.04) | (0.04) | (0.04) | (0.04) | ---    | ---    | ---    | (0.04)         |
|                                     | 00-01     | (0.07)             | (0.07) | (0.07) | (0.07) | (0.07) | (0.07) | (0.07) | (0.07) | (0.07) | ---    | ---    | ---    | (0.07)         |
|                                     | 01-02     | ---                | (0.08) | (0.08) | (0.08) | (0.08) | (0.08) | (0.08) | (0.08) | ---    | ---    | ---    | ---    | (0.08)         |
|                                     | 01-02     | ---                | (0.08) | (0.08) | (0.08) | (0.08) | (0.08) | (0.08) | (0.08) | ---    | ---    | ---    | ---    | (0.08)         |
| All Sales                           | 92-93     | 4.64               | 4.14   | 3.85   | 3.31   | 2.91   | 2.65   | 2.92   | 2.88   | 1.57   | ---    | ---    | ---    | 3.16           |
|                                     | 93-94     | 5.99               | 6.07   | 4.43   | 3.34   | 3.25   | 3.84   | 3.88   | 4.29   | ---    | ---    | ---    | ---    | 3.99           |
|                                     | 94-95     | 4.52               | 4.88   | 4.36   | 4.40   | 3.52   | 3.12   | 3.98   | 4.27   | ---    | ---    | ---    | ---    | 3.91           |
|                                     | 95-96     | ---                | 6.16   | 4.02   | 3.46   | 2.80   | 3.43   | 3.82   | 5.50   | ---    | ---    | ---    | ---    | 3.68           |
|                                     | 96-97     | 7.97               | 5.43   | 4.66   | 4.58   | 4.06   | 4.13   | 4.72   | 6.80   | ---    | ---    | ---    | ---    | 4.68           |
|                                     | 97-98     | 5.24               | 4.79   | 4.42   | 3.83   | 3.77   | 3.98   | 5.39   | 5.37   | 6.69   | ---    | ---    | ---    | 4.42           |
|                                     | 98-99     | ---                | 6.56   | 6.10   | 3.65   | 5.49   | 4.93   | 6.61   | 6.69   | ---    | ---    | ---    | ---    | 5.23           |
|                                     | 99-00     | ---                | 5.76   | 4.12   | 3.73   | 3.03   | 2.78   | 2.50   | 2.73   | 3.78   | ---    | ---    | ---    | 3.28           |
|                                     | 00-01     | 4.63               | 4.66   | 4.41   | 4.31   | 4.44   | 5.30   | 6.12   | 7.13   | 9.42   | ---    | ---    | ---    | 4.99           |
|                                     | 01-02     | ---                | 8.73   | 7.17   | 7.03   | 6.17   | 5.41   | 5.84   | 7.34   | ---    | ---    | ---    | ---    | 6.44           |
|                                     | 01-02     | ---                | 8.73   | 7.17   | 7.03   | 6.17   | 5.41   | 5.84   | 7.34   | ---    | ---    | ---    | ---    | 6.44           |

**Citrus Monthly and Season Average Prices, 1993-2002**

| Crop        | Crop Year | Feb.               | Mar.   | Apr.   | May    | June   | July   | Aug.   | Sept.  | Oct.   | Nov.   | Dec.  | Jan.  | Season Average |
|-------------|-----------|--------------------|--------|--------|--------|--------|--------|--------|--------|--------|--------|-------|-------|----------------|
|             |           | Dollars Per Carton |        |        |        |        |        |        |        |        |        |       |       |                |
| Oranges,    |           |                    |        |        |        |        |        |        |        |        |        |       |       |                |
| Valencia    | 92-93     | 3.52               | 4.62   | 5.02   | 4.37   | 4.47   | 5.02   | 6.62   | 9.67   | 9.52   | 4.17   | ---   | ---   | 5.92           |
| Fresh Sales | 93-94     | 6.09               | 5.89   | 5.34   | 5.59   | 5.24   | 4.74   | 5.09   | 4.84   | 4.09   | 4.79   | ---   | ---   | 5.04           |
|             | 94-95     | 5.20               | 5.15   | 5.50   | 6.05   | 5.85   | 5.50   | 5.60   | 5.80   | 5.50   | ---    | ---   | ---   | 5.70           |
|             | 95-96     | ---                | 6.65   | 6.00   | 5.65   | 5.55   | 6.55   | 7.70   | 10.60  | 8.75   | ---    | ---   | ---   | 6.85           |
|             | 96-97     | 6.35               | 6.35   | 5.40   | 5.20   | 5.25   | 5.45   | 6.30   | 6.40   | 5.75   | ---    | ---   | ---   | 5.65           |
|             | 97-98     | 4.60               | 5.85   | 6.60   | 6.45   | 5.95   | 5.20   | 4.60   | 5.05   | 5.50   | 6.55   | ---   | ---   | 5.50           |
|             | 98-99     | 12.56              | 11.76  | 11.76  | 12.01  | 10.76  | 9.21   | 8.61   | 10.36  | 10.01  | 7.61   | ---   | ---   | 10.21          |
|             | 99-00     | ---                | 4.65   | 4.55   | 4.00   | 3.75   | 3.20   | 2.95   | 3.10   | 2.50   | ---    | ---   | ---   | 3.35           |
|             | 00-01     | 5.53               | 5.73   | 6.08   | 5.63   | 4.88   | 4.33   | 4.48   | 5.38   | 4.83   | ---    | ---   | ---   | 5.08           |
|             | 01-02     | 7.61               | 5.81   | 4.96   | 4.36   | 3.91   | 3.76   | 4.31   | 4.36   | 4.51   | ---    | ---   | ---   | 4.41           |
| Processing  | 92-93     | (0.27)             | (0.27) | (0.27) | (0.16) | (0.06) | 0.16   | 0.26   | 0.36   | 0.36   | (0.16) | ---   | ---   | 0.08           |
|             | 93-94     | 0.07               | 0.18   | (0.03) | (0.03) | (0.03) | (0.03) | (0.03) | (0.03) | (0.03) | (0.03) | ---   | ---   | (0.03)         |
|             | 94-95     | (0.12)             | (0.19) | (0.24) | (0.24) | (0.24) | (0.24) | (0.24) | (0.24) | (0.24) | ---    | ---   | ---   | (0.24)         |
|             | 95-96     | (0.24)             | (0.24) | (0.24) | (0.24) | (0.24) | (0.24) | (0.24) | (0.24) | (0.24) | ---    | ---   | ---   | (0.24)         |
|             | 96-97     | 1.02               | 0.67   | 0.54   | 0.63   | 0.76   | 1.44   | 1.69   | 1.70   | 1.63   | ---    | ---   | ---   | 1.31           |
|             | 97-98     | 0.98               | 0.98   | 0.68   | 1.27   | 1.55   | 1.55   | 1.55   | 1.78   | 0.92   | 0.76   | ---   | ---   | 1.40           |
|             | 98-99     | 1.53               | 2.32   | 0.96   | 1.16   | 1.56   | 1.56   | 1.56   | 1.56   | 1.56   | 1.56   | ---   | ---   | 1.50           |
|             | 99-00     | ---                | (0.07) | (0.07) | (0.07) | (0.07) | (0.07) | (0.07) | (0.07) | (0.07) | ---    | ---   | ---   | (0.07)         |
|             | 00-01     | ---                | 0.38   | 0.38   | 0.38   | 0.38   | 0.38   | 0.38   | 0.38   | 0.38   | ---    | ---   | ---   | 0.38           |
|             | 01-02     | 0.37               | 0.37   | 0.37   | 0.37   | 0.37   | 0.37   | 0.37   | 0.37   | 0.37   | ---    | ---   | ---   | 0.37           |
| All Sales   | 92-93     | 2.89               | 3.19   | 3.25   | 3.24   | 3.25   | 3.56   | 4.65   | 6.95   | 6.90   | 1.70   | ---   | ---   | 4.24           |
|             | 93-94     | 4.59               | 4.65   | 4.14   | 4.35   | 3.82   | 3.06   | 3.14   | 2.74   | 1.78   | 2.42   | ---   | ---   | 3.16           |
|             | 94-95     | 4.09               | 4.62   | 4.35   | 4.96   | 4.77   | 4.77   | 4.69   | 4.67   | 4.83   | ---    | ---   | ---   | 4.74           |
|             | 95-96     | ---                | 5.93   | 4.79   | 4.77   | 4.11   | 4.63   | 5.50   | 7.89   | 6.24   | ---    | ---   | ---   | 5.26           |
|             | 96-97     | 5.02               | 5.04   | 4.56   | 4.42   | 4.01   | 4.28   | 4.77   | 4.62   | 4.04   | ---    | ---   | ---   | 4.39           |
|             | 97-98     | 3.21               | 4.23   | 5.19   | 5.60   | 5.07   | 4.43   | 3.82   | 4.06   | 4.26   | 5.69   | ---   | ---   | 4.52           |
|             | 98-99     | 9.55               | 10.18  | 8.81   | 7.47   | 6.97   | 5.42   | 4.46   | 6.11   | 5.84   | 5.59   | ---   | ---   | 6.14           |
|             | 99-00     | ---                | 3.86   | 3.93   | 3.19   | 2.63   | 1.66   | 1.33   | 1.30   | 0.87   | ---    | ---   | ---   | 1.74           |
|             | 00-01     | 5.53               | 5.42   | 5.49   | 4.99   | 4.04   | 3.49   | 3.68   | 4.27   | 3.62   | ---    | ---   | ---   | 4.22           |
|             | 01-02     | 6.41               | 4.82   | 3.94   | 3.66   | 3.27   | 3.26   | 3.84   | 3.86   | 3.89   | ---    | ---   | ---   | 3.76           |
| Crop        | Crop Year | Aug.               | Sept.  | Oct.   | Nov.   | Dec.   | Jan.   | Feb.   | Mar.   | Apr.   | May    | June  | July  | Season Average |
|             |           | Dollars Per Carton |        |        |        |        |        |        |        |        |        |       |       |                |
| Lemons,All  |           |                    |        |        |        |        |        |        |        |        |        |       |       |                |
| Fresh Sales | 92-93     | 9.82               | 10.82  | 8.37   | 4.47   | 5.57   | 6.12   | 6.17   | 6.87   | 7.82   | 9.32   | 14.12 | 14.62 | 9.22           |
|             | 93-94     | 17.25              | 16.90  | 13.15  | 9.15   | 6.10   | 4.95   | 4.25   | 5.35   | 7.15   | 8.55   | 12.30 | 16.00 | 10.10          |
|             | 94-95     | 18.48              | 16.28  | 10.43  | 7.88   | 6.88   | 6.68   | 6.13   | 6.13   | 7.73   | 9.98   | 14.48 | 17.63 | 9.93           |
|             | 95-96     | 17.43              | 15.33  | 11.53  | 7.78   | 6.08   | 5.48   | 4.88   | 5.58   | 7.48   | 9.83   | 13.33 | 15.83 | 9.23           |
|             | 96-97     | 14.58              | 13.48  | 11.03  | 9.98   | 8.68   | 7.08   | 5.58   | 5.28   | 6.93   | 11.68  | 16.73 | 19.88 | 10.43          |
|             | 97-98     | 20.73              | 18.33  | 11.88  | 6.78   | 5.48   | 4.83   | 4.53   | 5.63   | 7.08   | 9.68   | 14.73 | 18.08 | 9.58           |
|             | 98-99     | 16.68              | 13.43  | 14.18  | 11.03  | 8.58   | 10.28  | 7.38   | 7.13   | 8.68   | 10.33  | 13.08 | 15.28 | 10.33          |
|             | 99-00     | 14.69              | 15.24  | 13.14  | 10.59  | 11.69  | 11.44  | 8.89   | 8.94   | 7.59   | 7.14   | 10.89 | 13.94 | 10.49          |
|             | 00-01     | 14.30              | 10.80  | 7.80   | 5.85   | 5.70   | 5.25   | 5.20   | 6.35   | 8.75   | 9.65   | 10.55 | 13.40 | 9.00           |
|             | 01-02     | 15.26              | 13.56  | 13.96  | 12.36  | 10.61  | 9.26   | 8.46   | 8.01   | 9.21   | 10.66  | 13.11 | 13.66 | 11.41          |
| Processing  | 92-93     | 0.87               | 0.90   | 0.88   | 1.01   | 1.01   | 1.01   | 1.01   | 1.01   | 1.01   | 0.94   | 0.94  | 0.94  | 0.97           |
|             | 93-94     | 0.93               | 0.93   | 0.93   | 0.72   | 0.72   | 0.65   | 0.65   | 0.65   | 0.65   | 0.65   | 0.65  | 0.65  | 0.68           |
|             | 94-95     | 0.64               | 0.64   | 0.64   | 0.50   | 0.50   | 0.50   | 0.50   | 0.50   | 0.54   | 0.54   | 0.54  | 0.54  | 0.53           |
|             | 95-96     | 0.94               | 0.94   | 0.94   | 0.94   | 0.94   | 0.94   | 0.94   | 0.94   | 0.94   | 0.94   | 0.94  | 0.94  | 0.94           |
|             | 96-97     | 1.51               | 1.51   | 1.51   | 1.51   | 1.51   | 1.51   | 1.51   | 1.51   | 1.51   | 1.51   | 1.51  | 1.51  | 1.51           |
|             | 97-98     | 1.51               | 1.51   | 1.51   | 1.23   | 1.23   | 1.23   | 1.23   | 1.13   | 1.13   | 1.13   | 1.13  | 1.13  | 1.20           |
|             | 98-99     | 1.10               | 1.10   | 1.10   | 0.34   | 0.34   | 0.34   | 0.34   | 0.34   | 0.34   | 0.34   | 0.34  | 0.34  | 0.39           |
|             | 99-00     | 0.71               | 0.71   | 0.71   | 0.71   | 0.71   | 0.71   | 0.71   | 0.71   | 0.71   | 0.71   | 0.71  | 0.71  | 0.71           |
|             | 00-01     | 0.70               | 0.70   | 0.70   | 0.16   | 0.16   | 0.16   | 0.16   | 0.16   | 0.16   | 0.16   | 0.16  | 0.16  | 0.25           |
|             | 01-02     | 0.15               | 0.15   | 0.15   | 0.12   | 0.12   | 0.12   | 0.12   | 0.12   | 0.12   | 0.12   | 0.12  | 0.12  | 0.13           |
| All Sales   | 92-93     | 6.29               | 7.22   | 4.72   | 2.59   | 2.78   | 3.23   | 3.14   | 3.11   | 3.56   | 5.17   | 9.54  | 10.59 | 4.97           |
|             | 93-94     | 12.94              | 12.45  | 8.51   | 5.44   | 3.04   | 2.12   | 2.00   | 2.41   | 3.25   | 4.12   | 6.80  | 7.11  | 5.00           |
|             | 94-95     | 15.83              | 11.95  | 6.31   | 4.80   | 3.18   | 3.94   | 2.85   | 3.15   | 3.62   | 6.44   | 11.27 | 11.94 | 5.66           |
|             | 95-96     | 11.38              | 9.64   | 6.83   | 4.80   | 3.60   | 2.87   | 2.74   | 3.16   | 4.26   | 5.36   | 7.52  | 8.58  | 5.20           |
|             | 96-97     | 9.44               | 8.90   | 6.72   | 5.91   | 5.19   | 3.99   | 2.74   | 2.81   | 4.46   | 9.49   | 14.39 | 16.54 | 6.06           |
|             | 97-98     | 13.65              | 11.12  | 7.11   | 4.17   | 3.30   | 2.84   | 2.71   | 2.69   | 3.24   | 5.26   | 10.05 | 13.49 | 5.16           |
|             | 98-99     | 13.49              | 10.70  | 11.68  | 8.03   | 5.35   | 5.62   | 4.39   | 4.58   | 4.99   | 5.91   | 7.01  | 8.85  | 6.39           |
|             | 99-00     | 10.50              | 11.95  | 9.70   | 7.51   | 7.85   | 7.74   | 6.86   | 6.34   | 4.77   | 3.84   | 5.44  | 7.97  | 6.68           |
|             | 00-01     | 8.77               | 6.51   | 4.17   | 3.05   | 2.91   | 2.42   | 2.45   | 2.76   | 3.90   | 4.77   | 6.58  | 9.98  | 4.71           |
|             | 01-02     | 11.32              | 9.69   | 11.04  | 9.85   | 6.86   | 5.32   | 4.29   | 5.08   | 6.33   | 7.38   | 9.84  | 10.95 | 7.84           |

**Citrus Monthly and Season Average Prices, 1993-2002**

| Citrus Monthly and Season Average Prices, 1993-2002 |           |                    |        |        |        |        |        |        |        |        |      |      |       |                |
|-----------------------------------------------------|-----------|--------------------|--------|--------|--------|--------|--------|--------|--------|--------|------|------|-------|----------------|
| Crop                                                | Crop Year | Oct.               | Nov.   | Dec.   | Jan.   | Feb.   | Mar.   | Apr.   | May    | June   | July | Aug. | Sept. | Season Average |
|                                                     |           | Dollars Per Carton |        |        |        |        |        |        |        |        |      |      |       |                |
| Tangerines                                          |           |                    |        |        |        |        |        |        |        |        |      |      |       |                |
| Fresh Sales                                         | 92-93     | 13.92              | 8.52   | 8.07   | 8.17   | 8.27   | 9.52   | 9.22   | ---    | ---    | ---  | ---  | ---   | 8.72           |
|                                                     | 93-94     | 13.69              | 10.24  | 7.29   | 6.09   | 7.09   | 7.34   | 7.34   | 5.79   | ---    | ---  | ---  | ---   | 8.04           |
|                                                     | 94-95     | 13.95              | 10.40  | 7.85   | 9.30   | 10.75  | 11.25  | 13.25  | 13.25  | 13.25  | ---  | ---  | ---   | 10.50          |
|                                                     | 95-96     | 14.45              | 9.80   | 7.10   | 5.40   | 6.10   | 6.95   | 6.85   | 6.15   | ---    | ---  | ---  | ---   | 7.90           |
|                                                     | 96-97     | 15.00              | 10.65  | 8.45   | 9.35   | 8.25   | 7.05   | 8.05   | 6.90   | ---    | ---  | ---  | ---   | 9.30           |
|                                                     | 97-98     | 15.45              | 10.25  | 8.85   | 8.00   | 7.00   | 7.10   | 6.35   | (0.25) | (0.40) | ---  | ---  | ---   | 8.35           |
|                                                     | 98-99     | 13.51              | 11.71  | 10.16  | 9.76   | 8.56   | 8.91   | 1.96   | ---    | ---    | ---  | ---  | ---   | 10.16          |
|                                                     | 99-00     | 18.10              | 12.50  | 8.30   | 7.20   | 6.25   | 7.95   | 7.75   | 6.55   | ---    | ---  | ---  | ---   | 8.20           |
|                                                     | 00-01     | 15.53              | 10.58  | 8.28   | 7.63   | 9.48   | 11.03  | 3.98   | ---    | ---    | ---  | ---  | ---   | 9.13           |
|                                                     | 01-02     | 16.91              | 10.76  | 8.26   | 10.41  | 10.01  | 9.26   | 9.86   | 10.46  | ---    | ---  | ---  | ---   | 9.81           |
| Processing                                          | 92-93     | (0.28)             | (0.28) | (0.28) | (0.28) | (0.28) | (0.28) | (0.28) | (0.20) | ---    | ---  | ---  | ---   | (0.28)         |
|                                                     | 93-94     | (0.16)             | (0.24) | (0.24) | (0.20) | ---    | 0.08   | (0.09) | (0.09) | ---    | ---  | ---  | ---   | (0.06)         |
|                                                     | 94-95     | (0.16)             | (0.16) | (0.08) | (0.08) | (0.16) | (0.21) | (0.25) | (0.25) | (0.25) | ---  | ---  | ---   | (0.16)         |
|                                                     | 95-96     | ---                | (0.16) | (0.16) | (0.16) | (0.16) | (0.16) | (0.16) | (0.16) | ---    | ---  | ---  | ---   | (0.16)         |
|                                                     | 96-97     | (0.14)             | (0.14) | (0.14) | (0.14) | (0.14) | (0.14) | (0.14) | ---    | ---    | ---  | ---  | ---   | (0.14)         |
|                                                     | 97-98     | (0.14)             | (0.14) | (0.14) | (0.04) | 0.10   | 0.33   | 0.33   | 0.33   | 0.33   | ---  | ---  | ---   | 0.01           |
|                                                     | 98-99     | 0.21               | 0.21   | 0.69   | 0.73   | 0.69   | 0.35   | (0.17) | ---    | ---    | ---  | ---  | ---   | 0.50           |
|                                                     | 99-00     | (0.07)             | (0.07) | (0.07) | (0.07) | (0.07) | (0.07) | (0.07) | (0.07) | ---    | ---  | ---  | ---   | (0.07)         |
|                                                     | 00-01     | (0.09)             | (0.09) | (0.09) | (0.09) | (0.09) | (0.09) | (0.09) | ---    | ---    | ---  | ---  | ---   | (0.09)         |
|                                                     | 01-02     | 0.37               | 0.37   | 0.37   | 0.37   | 0.37   | 0.37   | 0.37   | ---    | ---    | ---  | ---  | ---   | 0.37           |
| All Sales                                           | 92-93     | 11.68              | 7.30   | 6.11   | 5.04   | 5.12   | 6.31   | 1.63   | (0.20) | ---    | ---  | ---  | ---   | 6.00           |
|                                                     | 93-94     | 12.06              | 9.59   | 6.43   | 3.51   | 4.39   | 3.71   | 4.37   | 3.83   | ---    | ---  | ---  | ---   | 5.58           |
|                                                     | 94-95     | 9.25               | 7.76   | 5.69   | 5.28   | 7.12   | 7.43   | 6.50   | 6.50   | 10.55  | ---  | ---  | ---   | 7.09           |
|                                                     | 95-96     | 14.45              | 8.66   | 6.19   | 3.72   | 3.19   | 3.11   | 3.34   | 4.04   | ---    | ---  | ---  | ---   | 5.42           |
|                                                     | 96-97     | 12.47              | 8.56   | 6.69   | 7.85   | 6.50   | 5.71   | 7.30   | 6.90   | ---    | ---  | ---  | ---   | 7.56           |
|                                                     | 97-98     | 10.00              | 7.01   | 5.26   | 5.32   | 5.43   | 5.41   | 4.63   | (0.09) | (0.17) | ---  | ---  | ---   | 5.74           |
|                                                     | 98-99     | 9.88               | 8.54   | 7.57   | 6.86   | 6.24   | 5.89   | 1.59   | ---    | ---    | ---  | ---  | ---   | 7.34           |
|                                                     | 99-00     | 13.56              | 8.03   | 6.24   | 5.38   | 4.45   | 4.94   | 4.92   | 3.52   | ---    | ---  | ---  | ---   | 5.55           |
|                                                     | 00-01     | 10.23              | 8.20   | 6.12   | 5.71   | 6.96   | 9.05   | 3.59   | ---    | ---    | ---  | ---  | ---   | 7.08           |
|                                                     | 01-02     | 15.26              | 8.94   | 7.99   | 9.51   | 8.82   | 7.90   | 9.04   | 10.46  | ---    | ---  | ---  | ---   | 8.83           |

**Drying Ratio -- Tons of Green Fruit Required to Produce One Dried Ton**

| Year | Apricots | Figs | Peaches, Freestone | Pears, Bartlett | Plums, Dried (Prunes) | Raisins |
|------|----------|------|--------------------|-----------------|-----------------------|---------|
| 1993 | 6.60     | 3.00 | 8.10               | 6.50            | 3.10                  | 4.30    |
| 1994 | 6.40     | 3.00 | 9.30               | 6.15            | 3.10                  | 4.50    |
| 1995 | 6.50     | 3.00 | 9.00               | 6.10            | 3.30                  | 5.00    |
| 1996 | 6.90     | 3.00 | 9.60               | 7.00            | 3.20                  | 4.20    |
| 1997 | 6.90     | 3.00 | 9.00               | 6.75            | 3.06                  | 4.15    |
| 1998 | 7.20     | 3.00 | 8.06               | 6.91            | 3.20                  | 4.70    |
| 1999 | 6.03     | 3.00 | 8.49               | 6.93            | 2.90                  | 4.17    |
| 2000 | 7.14     | 3.00 | 9.33               | 6.67            | 3.11                  | 4.43    |
| 2001 | 7.32     | 3.00 | 10.07              | 6.00            | 2.80                  | 4.15    |
| 2002 | 7.14     | 3.00 | 9.31               | 6.52            | 2.98                  | 4.50    |



**Non-Citrus Fruit Acreage, Production and Value, 1993-2002**

| Crop            | Crop Year | Bearing      | Non-Bearing 1/ | Yield Per Acre | Production  | Value Per Unit 2/ | Total Value    |
|-----------------|-----------|--------------|----------------|----------------|-------------|-------------------|----------------|
|                 |           | <i>Acres</i> | <i>Acres</i>   | <i>Tons</i>    | <i>Tons</i> | <i>\$/Ton</i>     | <i>\$1,000</i> |
| Apples          | 1993      | 34,700       | 4,200          | 12.70          | 440,000     | 314.00            | 138,320        |
|                 | 1994      | 34,900       | 4,700          | 15.05          | 525,000     | 266.00            | 139,300        |
|                 | 1995      | 35,000       | 4,300          | 12.15          | 425,000     | 366.00            | 155,750        |
|                 | 1996      | 38,000       | ---            | 12.50          | 475,000     | 332.00            | 158,050        |
|                 | 1997      | 38,500       | ---            | 12.50          | 481,000     | 338.00            | 162,655        |
|                 | 1998      | 37,000       | ---            | 11.60          | 430,000     | 306.00            | 131,340        |
|                 | 1999      | 35,000       | ---            | 12.80          | 448,000     | 316.00            | 141,764        |
|                 | 2000      | 31,000       | ---            | 9.20           | 285,000     | 328.00            | 83,430         |
|                 | 2001      | 29,000       | ---            | 8.95           | 260,000     | 314.00            | 77,110         |
|                 | 2002      | 26,000       | ---            | 9.05           | 235,000     | 408.00            | 93,840         |
| Apricots        | 1993      | 19,300       | 1,500          | 4.61           | 89,000      | 363.00            | 32,288         |
|                 | 1994      | 19,800       | ---            | 7.32           | 145,000     | 331.00            | 43,700         |
|                 | 1995      | 19,800       | ---            | 2.73           | 54,000      | 387.00            | 20,913         |
|                 | 1996      | 20,200       | ---            | 3.76           | 76,000      | 403.00            | 30,663         |
|                 | 1997      | 20,000       | ---            | 6.60           | 132,000     | 308.00            | 37,673         |
|                 | 1998      | 20,000       | ---            | 5.65           | 113,000     | 311.00            | 31,895         |
|                 | 1999      | 19,000       | ---            | 4.47           | 85,000      | 361.00            | 30,703         |
|                 | 2000      | 19,000       | ---            | 4.74           | 90,000      | 329.00            | 26,679         |
|                 | 2001      | 18,000       | ---            | 4.28           | 77,000      | 319.00            | 22,330         |
|                 | 2002      | 17,000       | ---            | 5.00           | 85,000      | 306.00            | 22,964         |
| Avocados        | 92-93     | 72,900       | 300            | 3.90           | 284,000     | 400.00            | 113,600        |
|                 | 93-94     | 66,900       | ---            | 2.08           | 139,000     | 1,810.00          | 251,590        |
|                 | 94-95     | 61,300       | ---            | 2.53           | 155,000     | 1,480.00          | 229,894        |
|                 | 95-96     | 61,100       | ---            | 2.80           | 171,000     | 1,370.00          | 234,831        |
|                 | 96-97     | 59,900       | ---            | 2.79           | 167,000     | 1,560.00          | 260,162        |
|                 | 97-98     | 59,900       | ---            | 2.57           | 154,000     | 1,710.00          | 263,473        |
|                 | 98-99     | 59,400       | ---            | 2.29           | 136,000     | 2,400.00          | 327,002        |
|                 | 99-00     | 59,000       | ---            | 2.73           | 161,000     | 2,110.00          | 339,594        |
|                 | 00-01     | 59,000       | ---            | 3.61           | 213,000     | 1,480.00          | 315,842        |
|                 | 01-02     | 58,000       | ---            | 3.45           | 200,000     | 1,790.00          | 358,000        |
| Cherries, Sweet | 1993      | 11,700       | 2,700          | 1.62           | 19,000      | 2,270.00          | 43,203         |
|                 | 1994      | 13,500       | ---            | 3.85           | 52,000      | 1,220.00          | 63,512         |
|                 | 1995      | 15,000       | ---            | 1.32           | 19,800      | 2,100.00          | 41,540         |
|                 | 1996      | 16,500       | ---            | 1.49           | 24,600      | 1,850.00          | 45,430         |
|                 | 1997      | 17,000       | ---            | 2.89           | 49,200      | 1,290.00          | 63,375         |
|                 | 1998      | 17,500       | ---            | 0.87           | 15,200      | 1,550.00          | 23,512         |
|                 | 1999      | 18,500       | ---            | 4.38           | 81,000      | 866.00            | 68,866         |
|                 | 2000      | 22,000       | ---            | 2.14           | 47,000      | 1,570.00          | 71,564         |
|                 | 2001      | 25,000       | ---            | 2.21           | 55,300      | 1,560.00          | 79,814         |
|                 | 2002      | 26,000       | ---            | 2.13           | 55,500      | 1,740.00          | 93,315         |
| Dates           | 1993      | 5,500        | 200            | 5.27           | 29,000      | 790.00            | 22,910         |
|                 | 1994      | 5,500        | ---            | 4.18           | 23,000      | 750.00            | 17,250         |
|                 | 1995      | 5,200        | ---            | 4.37           | 22,700      | 780.00            | 17,706         |
|                 | 1996      | 4,680        | ---            | 4.91           | 23,000      | 1,090.00          | 25,070         |
|                 | 1997      | 4,800        | ---            | 4.38           | 21,000      | 1,100.00          | 23,100         |
|                 | 1998      | 4,900        | ---            | 5.08           | 24,900      | 1,220.00          | 30,378         |
|                 | 1999      | 4,900        | ---            | 4.53           | 22,200      | 1,240.00          | 27,528         |
|                 | 2000      | 4,800        | ---            | 3.63           | 17,400      | 1,230.00          | 21,402         |
|                 | 2001      | 4,600        | ---            | 4.28           | 19,700      | 1,360.00          | 26,792         |
|                 | 2002      | 4,500        | ---            | 5.38           | 24,200      | 1,550.00          | 37,510         |

**Non-Citrus Fruit Acreage, Production and Value, 1993-2002**

| Crop                 | Crop Year | Bearing      | Non-Bearing 1/ | Yield Per Acre | Production  | Value Per Unit 2/ | Total Value    |
|----------------------|-----------|--------------|----------------|----------------|-------------|-------------------|----------------|
|                      |           | <i>Acres</i> | <i>Acres</i>   | <i>Tons</i>    | <i>Tons</i> | <i>\$/Ton</i>     | <i>\$1,000</i> |
| Figs                 | 1993      | 14,200       | 500            | 4.27           | 60,700      | 401.00            | 24,341         |
|                      | 1994      | 14,600       | ---            | 3.88           | 56,700      | 419.00            | 23,768         |
|                      | 1995      | 14,700       | ---            | 3.56           | 52,400      | 314.00            | 16,429         |
|                      | 1996      | 15,400       | ---            | 2.95           | 45,500      | 283.00            | 12,894         |
|                      | 1997      | 16,400       | ---            | 3.51           | 57,500      | 265.00            | 15,209         |
|                      | 1998      | 16,300       | ---            | 3.15           | 51,300      | 226.00            | 11,611         |
|                      | 1999      | 14,700       | ---            | 3.22           | 47,300      | 268.00            | 12,685         |
|                      | 2000      | 15,400       | ---            | 3.63           | 55,900      | 272.00            | 15,226         |
|                      | 2001      | 14,000       | ---            | 2.93           | 41,000      | 366.00            | 15,012         |
|                      | 2002      | 12,900       | ---            | 4.22           | 54,400      | 331.00            | 18,012         |
| Grapes, Raisin 3/ 4/ | 1993      | 266,000      | 10,700         | 9.57           | 2,354,000   | 255.00            | 599,404        |
|                      | 1994      | 270,000      | 10,200         | 8.85           | 2,389,000   | 229.00            | 547,002        |
|                      | 1995      | 268,000      | 9,500          | 9.27           | 2,252,000   | 234.00            | 526,297        |
|                      | 1996      | 270,000      | 7,800          | 8.12           | 2,192,000   | 281.00            | 614,940        |
|                      | 1997      | 270,000      | 5,300          | 10.68          | 2,883,000   | 262.00            | 756,405        |
|                      | 1998      | 275,000      | 6,000          | 7.55           | 2,077,000   | 291.00            | 604,036        |
|                      | 1999      | 279,000      | 7,000          | 7.61           | 2,122,000   | 321.00            | 680,864        |
|                      | 2000      | 280,000      | 7,000          | 10.40          | 2,921,000   | 166.00            | 485,139        |
|                      | 2001      | 235,000      | 7,000          | 9.43           | 2,215,000   | 182.00            | 403,304        |
|                      | 2002      | 246,000      | 6,000          | 11.50          | 2,833,000   | 155.00            | 438,458        |
| Grapes, Table        | 1993      | 77,800       | 6,400          | 8.12           | 632,000     | 574.00            | 362,544        |
|                      | 1994      | 78,000       | 8,100          | 7.72           | 602,000     | 515.00            | 310,022        |
|                      | 1995      | 79,000       | 11,600         | 8.95           | 707,000     | 523.00            | 370,097        |
|                      | 1996      | 80,000       | 14,800         | 7.40           | 592,000     | 650.00            | 384,505        |
|                      | 1997      | 81,000       | 13,100         | 10.19          | 825,000     | 448.00            | 369,420        |
|                      | 1998      | 83,000       | 15,000         | 7.75           | 643,000     | 499.00            | 320,693        |
|                      | 1999      | 87,000       | 13,000         | 8.71           | 758,000     | 552.00            | 418,497        |
|                      | 2000      | 89,000       | 11,000         | 8.70           | 774,000     | 565.00            | 437,448        |
|                      | 2001      | 88,000       | 10,000         | 8.10           | 713,000     | 610.00            | 435,177        |
|                      | 2002      | 88,000       | 9,000          | 8.40           | 739,000     | 618.00            | 456,944        |
| Grapes, Wine         | 1993      | 312,000      | 33,400         | 7.68           | 2,397,000   | 361.00            | 866,382        |
|                      | 1994      | 322,000      | 47,100         | 7.03           | 2,265,000   | 378.00            | 855,915        |
|                      | 1995      | 328,000      | 64,400         | 6.94           | 2,275,000   | 424.00            | 965,150        |
|                      | 1996      | 350,000      | 76,200         | 6.36           | 2,225,000   | 536.00            | 1,192,185      |
|                      | 1997      | 374,000      | 78,300         | 7.86           | 2,940,000   | 598.00            | 1,756,935      |
|                      | 1998      | 385,000      | 122,000        | 6.68           | 2,570,000   | 581.00            | 1,491,908      |
|                      | 1999      | 424,000      | 130,000        | 6.28           | 2,662,000   | 585.00            | 1,556,405      |
|                      | 2000      | 458,000      | 110,000        | 7.34           | 3,364,000   | 567.00            | 1,908,649      |
|                      | 2001      | 480,000      | 90,000         | 6.36           | 3,051,000   | 597.00            | 1,820,106      |
|                      | 2002      | 486,000      | 70,000         | 6.48           | 3,149,000   | 535.00            | 1,683,452      |
| Grapes, All 3/ 6/    | 1993      | 655,800      | 50,500         | 8.47           | 5,383,000   | 340.00            | 1,828,330      |
|                      | 1994      | 670,000      | 65,400         | 7.84           | 5,256,000   | 326.00            | 1,712,939      |
|                      | 1995      | 675,000      | 85,500         | 8.05           | 5,234,000   | 356.00            | 1,861,544      |
|                      | 1996      | 700,000      | 98,800         | 7.16           | 5,009,000   | 438.00            | 2,191,630      |
|                      | 1997      | 725,000      | 96,700         | 9.17           | 6,648,000   | 434.00            | 2,882,760      |
|                      | 1998      | 743,000      | 143,000        | 7.12           | 5,290,000   | 457.00            | 2,416,637      |
|                      | 1999      | 790,000      | 150,000        | 7.02           | 5,542,000   | 479.00            | 2,655,766      |
|                      | 2000      | 827,000      | 128,000        | 8.54           | 7,059,000   | 401.00            | 2,831,236      |
|                      | 2001      | 803,000      | 107,000        | 7.45           | 5,979,000   | 445.00            | 2,658,587      |
|                      | 2002      | 820,000      | 85,000         | 8.20           | 6,721,000   | 384.00            | 2,578,854      |

**Non-Citrus Fruit Acreage, Production and Value, 1993-2002**

| Crop                   | Crop Year | Bearing      | Non-Bearing 1/ | Yield Per Acre | Production  | Value Per Unit 2/ | Total Value    |
|------------------------|-----------|--------------|----------------|----------------|-------------|-------------------|----------------|
|                        |           | <i>Acres</i> | <i>Acres</i>   | <i>Tons</i>    | <i>Tons</i> | <i>\$/Ton</i>     | <i>\$1,000</i> |
| Kiwifruit              | 1993      | 6,900        | 10             | 7.13           | 49,200      | 370.00            | 16,502         |
|                        | 1994      | 6,500        | ---            | 6.06           | 39,400      | 491.00            | 18,413         |
|                        | 1995      | 6,100        | ---            | 6.20           | 37,800      | 459.00            | 15,434         |
|                        | 1996      | 5,700        | ---            | 5.53           | 31,500      | 470.00            | 13,157         |
|                        | 1997      | 5,300        | ---            | 6.60           | 35,000      | 518.00            | 16,483         |
|                        | 1998      | 5,300        | ---            | 6.91           | 36,600      | 744.00            | 24,544         |
|                        | 1999      | 5,300        | ---            | 5.09           | 27,000      | 634.00            | 15,215         |
|                        | 2000      | 5,300        | ---            | 6.42           | 34,000      | 455.00            | 13,888         |
|                        | 2001      | 4,900        | ---            | 5.27           | 25,800      | 667.00            | 15,340         |
|                        | 2002      | 4,500        | ---            | 5.80           | 26,100      | 783.00            | 18,097         |
| Nectarines             | 1993      | 28,000       | 8,300          | 7.32           | 205,000     | 500.00            | 102,421        |
|                        | 1994      | 31,000       | ---            | 7.81           | 242,000     | 282.00            | 68,168         |
|                        | 1995      | 34,000       | ---            | 5.18           | 176,000     | 534.00            | 93,990         |
|                        | 1996      | 35,000       | ---            | 7.06           | 247,000     | 474.00            | 116,977        |
|                        | 1997      | 36,000       | ---            | 7.33           | 264,000     | 375.00            | 98,895         |
|                        | 1998      | 35,500       | ---            | 6.31           | 224,000     | 471.00            | 105,466        |
|                        | 1999      | 35,500       | ---            | 7.72           | 274,000     | 411.00            | 112,497        |
|                        | 2000      | 35,500       | ---            | 7.52           | 267,000     | 398.00            | 106,256        |
|                        | 2001      | 36,500       | ---            | 7.53           | 275,000     | 464.00            | 127,642        |
|                        | 2002      | 36,500       | ---            | 8.19           | 299,000     | 383.00            | 114,517        |
| Olives 5/              | 1993      | 30,100       | 4,400          | 4.05           | 122,000     | 467.00            | 56,991         |
|                        | 1994      | 32,000       | ---            | 2.63           | 84,000      | 464.00            | 38,994         |
|                        | 1995      | 33,700       | ---            | 2.30           | 77,500      | 646.00            | 50,069         |
|                        | 1996      | 33,700       | ---            | 4.93           | 166,000     | 617.00            | 102,364        |
|                        | 1997      | 35,300       | ---            | 2.95           | 104,000     | 642.00            | 66,801         |
|                        | 1998      | 35,300       | ---            | 2.55           | 90,000      | 459.00            | 41,331         |
|                        | 1999      | 35,300       | ---            | 4.02           | 142,000     | 387.00            | 55,011         |
|                        | 2000      | 36,000       | ---            | 1.47           | 53,000      | 656.00            | 34,743         |
|                        | 2001      | 36,000       | ---            | 3.72           | 134,000     | 672.00            | 90,096         |
|                        | 2002      | 36,000       | ---            | 2.86           | 103,000     | 590.00            | 60,725         |
| Peaches, Clingstone 5/ | 1993      | 30,200       | 9,000          | 18.20          | 548,500     | 218.00            | 113,033        |
|                        | 1994      | 30,200       | ---            | 18.70          | 565,000     | 180.00            | 97,470         |
|                        | 1995      | 28,100       | ---            | 15.40          | 432,500     | 214.00            | 87,847         |
|                        | 1996      | 31,000       | ---            | 17.70          | 546,500     | 220.00            | 114,510        |
|                        | 1997      | 31,000       | ---            | 18.50          | 574,000     | 260.00            | 143,000        |
|                        | 1998      | 30,400       | ---            | 17.20          | 522,500     | 220.00            | 112,862        |
|                        | 1999      | 29,800       | ---            | 17.80          | 529,500     | 226.00            | 115,740        |
|                        | 2000      | 28,200       | ---            | 18.85          | 532,000     | 250.00            | 127,125        |
|                        | 2001      | 28,800       | ---            | 16.55          | 476,000     | 244.00            | 110,044        |
|                        | 2002      | 31,000       | ---            | 18.15          | 562,000     | 248.00            | 132,639        |
| Peaches, Freestone     | 1993      | 29,500       | 5,400          | 10.20          | 301,500     | 298.00            | 90,072         |
|                        | 1994      | 30,100       | ---            | 10.60          | 317,000     | 214.00            | 67,918         |
|                        | 1995      | 32,500       | ---            | 7.70           | 251,000     | 372.00            | 93,175         |
|                        | 1996      | 34,300       | ---            | 9.90           | 337,000     | 434.00            | 146,306        |
|                        | 1997      | 35,200       | ---            | 10.50          | 369,500     | 244.00            | 89,937         |
|                        | 1998      | 37,000       | ---            | 9.20           | 340,500     | 314.00            | 107,155        |
|                        | 1999      | 38,000       | ---            | 10.00          | 381,500     | 320.00            | 122,420        |
|                        | 2000      | 39,000       | ---            | 10.15          | 395,500     | 314.00            | 124,484        |
|                        | 2001      | 39,000       | ---            | 9.95           | 387,500     | 352.00            | 136,699        |
|                        | 2002      | 39,000       | ---            | 10.20          | 398,000     | 348.00            | 138,369        |

**Non-Citrus Fruit Acreage, Production and Value, 1993-2002**

| Crop            | Crop Year | Bearing      | Non-Bearing 1/ | Yield Per Acre | Production  | Value Per Unit 2/ | Total Value    |
|-----------------|-----------|--------------|----------------|----------------|-------------|-------------------|----------------|
|                 |           | <i>Acres</i> | <i>Acres</i>   | <i>Tons</i>    | <i>Tons</i> | <i>\$/Ton</i>     | <i>\$1,000</i> |
| Peaches, All    | 1993      | 59,700       | 14,400         | 14.30          | 850,000     | 248.00            | 203,105        |
|                 | 1994      | 60,300       | ---            | 14.70          | 882,000     | 193.00            | 165,388        |
|                 | 1995      | 60,600       | ---            | 11.30          | 683,500     | 274.00            | 181,022        |
|                 | 1996      | 65,300       | ---            | 13.60          | 883,500     | 304.00            | 260,816        |
|                 | 1997      | 66,200       | ---            | 14.30          | 943,500     | 254.00            | 232,937        |
|                 | 1998      | 67,400       | ---            | 12.80          | 863,000     | 258.00            | 220,017        |
|                 | 1999      | 67,800       | ---            | 13.50          | 911,000     | 266.00            | 238,160        |
|                 | 2000      | 67,200       | ---            | 13.80          | 927,500     | 278.00            | 251,609        |
|                 | 2001      | 67,800       | ---            | 12.75          | 863,500     | 294.00            | 246,743        |
|                 | 2002      | 70,000       | ---            | 13.70          | 960,000     | 290.00            | 271,008        |
| Pears, Bartlett | 1993      | 19,900       | 100            | 14.50          | 288,000     | 237.00            | 68,287         |
|                 | 1994      | 19,500       | ---            | 17.10          | 333,000     | 183.00            | 60,904         |
|                 | 1995      | 18,400       | ---            | 13.40          | 247,000     | 212.00            | 52,453         |
|                 | 1996      | 17,500       | ---            | 16.40          | 287,000     | 267.00            | 76,594         |
|                 | 1997      | 15,600       | ---            | 18.10          | 282,000     | 263.00            | 74,054         |
|                 | 1998      | 15,000       | ---            | 18.50          | 277,000     | 246.00            | 68,121         |
|                 | 1999      | 15,000       | ---            | 20.70          | 311,000     | 208.00            | 64,676         |
|                 | 2000      | 15,000       | ---            | 18.80          | 282,000     | 205.00            | 54,666         |
|                 | 2001      | 14,000       | ---            | 19.60          | 275,000     | 255.00            | 61,202         |
|                 | 2002      | 13,000       | ---            | 19.60          | 232,000     | 242.00            | 56,120         |
| Pears, Other    | 1993      | 4,200        | 900            | 4.76           | 20,000      | 528.00            | 10,561         |
|                 | 1994      | 4,800        | ---            | 6.25           | 30,000      | 281.00            | 8,423          |
|                 | 1995      | 4,600        | ---            | 4.35           | 20,000      | 537.00            | 10,734         |
|                 | 1996      | 4,500        | ---            | 6.67           | 30,000      | 500.00            | 15,000         |
|                 | 1997      | 4,400        | ---            | 6.82           | 30,000      | 371.00            | 11,130         |
|                 | 1998      | 4,300        | ---            | 6.98           | 30,000      | 436.00            | 13,080         |
|                 | 1999      | 4,300        | ---            | 6.98           | 30,000      | 295.00            | 8,850          |
|                 | 2000      | 4,300        | ---            | 6.98           | 30,000      | 437.00            | 13,110         |
|                 | 2001      | 4,300        | ---            | 6.98           | 30,000      | 369.00            | 11,070         |
|                 | 2002      | 4,300        | ---            | 6.98           | 30,000      | 405.00            | 12,150         |
| Pears, All      | 1993      | 24,100       | 1,000          | 12.80          | 308,000     | 256.00            | 78,848         |
|                 | 1994      | 24,300       | ---            | 14.90          | 363,000     | 191.00            | 69,327         |
|                 | 1995      | 23,000       | ---            | 11.60          | 267,000     | 237.00            | 63,187         |
|                 | 1996      | 22,000       | ---            | 14.40          | 317,000     | 289.00            | 91,594         |
|                 | 1997      | 20,000       | ---            | 15.60          | 312,000     | 273.00            | 85,184         |
|                 | 1998      | 19,300       | ---            | 15.90          | 307,000     | 264.00            | 81,201         |
|                 | 1999      | 19,300       | ---            | 17.70          | 341,000     | 216.00            | 73,526         |
|                 | 2000      | 19,300       | ---            | 16.20          | 312,000     | 228.00            | 67,776         |
|                 | 2001      | 18,300       | ---            | 16.70          | 305,000     | 289.00            | 72,272         |
|                 | 2002      | 17,300       | ---            | 15.10          | 262,000     | 261.00            | 68,270         |
| Plums           | 1993      | 41,200       | 3,500          | 4.49           | 185,000     | 508.00            | 93,954         |
|                 | 1994      | 41,600       | ---            | 5.94           | 247,000     | 321.00            | 79,358         |
|                 | 1995      | 42,000       | ---            | 2.95           | 124,000     | 950.00            | 117,849        |
|                 | 1996      | 42,600       | ---            | 5.35           | 228,000     | 420.00            | 95,831         |
|                 | 1997      | 42,000       | ---            | 5.86           | 246,000     | 312.00            | 76,825         |
|                 | 1998      | 42,000       | ---            | 4.48           | 188,000     | 529.00            | 99,388         |
|                 | 1999      | 40,000       | ---            | 4.90           | 196,000     | 419.00            | 82,041         |
|                 | 2000      | 38,000       | ---            | 5.18           | 197,000     | 442.00            | 87,115         |
|                 | 2001      | 37,000       | ---            | 5.68           | 210,000     | 306.00            | 64,362         |
|                 | 2002      | 36,000       | ---            | 5.58           | 201,000     | 386.00            | 77,586         |

### Non-Citrus Fruit Acreage, Production and Value, 1993-2002

| Crop                     | Crop Year | Bearing      | Non-Bearing 1/ | Yield Per Acre | Production  | Value Per Unit 2/ | Total Value    |
|--------------------------|-----------|--------------|----------------|----------------|-------------|-------------------|----------------|
|                          |           | <i>Acres</i> | <i>Acres</i>   | <i>Tons</i>    | <i>Tons</i> | <i>\$/Ton</i>     | <i>\$1,000</i> |
| Plums, Dried (Prunes) 6/ |           |              |                |                |             |                   |                |
|                          | 1993      | 83,000       | 11,000         | 1.46           | 121,000     | 1,120.00          | 135,520        |
|                          | 1994      | 84,000       | 18,800         | 2.30           | 193,000     | 1,090.00          | 210,370        |
|                          | 1995      | 83,500       | 23,200         | 2.17           | 181,000     | 1,040.00          | 188,240        |
|                          | 1996      | 85,000       | 23,700         | 2.62           | 223,000     | 839.00            | 187,097        |
|                          | 1997      | 82,000       | 21,300         | 2.61           | 214,000     | 883.00            | 181,015        |
|                          | 1998      | 83,000       | 26,000         | 1.30           | 108,000     | 764.00            | 78,692         |
|                          | 1999      | 83,000       | 22,000         | 2.14           | 178,000     | 861.00            | 142,065        |
|                          | 2000      | 86,000       | 15,000         | 2.55           | 219,000     | 770.00            | 154,770        |
|                          | 2001      | 86,000       | 11,000         | 1.74           | 150,000     | 723.00            | 97,605         |
|                          | 2002      | 74,000       | 9,000          | 2.31           | 171,000     | 810.00            | 131,220        |
| Miscellaneous            |           |              |                |                |             |                   |                |
| Fruits and Nuts 7/       |           |              |                |                |             |                   |                |
|                          | 1993      | 25,000       | ---            | ---            | 165,000     | ---               | 70,950         |
|                          | 1994      | 29,000       | ---            | ---            | 193,000     | ---               | 80,642         |
|                          | 1995      | 22,000       | ---            | ---            | 132,000     | ---               | 62,750         |
|                          | 1996      | 27,000       | ---            | ---            | 165,000     | ---               | 81,872         |
|                          | 1997      | 41,000       | ---            | ---            | 288,000     | ---               | 144,664        |
|                          | 1998      | 39,000       | ---            | ---            | 232,000     | ---               | 113,024        |
|                          | 1999      | 46,000       | ---            | ---            | 253,000     | ---               | 135,393        |
|                          | 2000      | 49,000       | ---            | ---            | 309,000     | ---               | 143,446        |
|                          | 2001      | 48,000       | ---            | ---            | 273,000     | ---               | 144,110        |
|                          | 2002      | 43,000       | ---            | ---            | 262,000     | ---               | 140,700        |

1/ Non-bearing shown only in years acreage surveys were conducted.

2/ Return at processing plant door or packinghouse door.

3/ Acres of raisin type grapes enrolled in the California Raisin Industry Diversion (RID) program were; 1993 -- 20,000; 1994 -- zero; 1995 -- 25,000; 1996, 1997, 1998, 1999 and 2000 -- zero; 2001 -- 41,000; 2002 -- 27,000. These acres were deducted from bearing acres before calculating yield.

4/ Raisin-type production is the fresh equivalent of dried and not dried.

5/ Total value based on grower return.

6/ Acreage by county, variety and year of planting for 2002 are available upon request.

7/ These crops are almond hulls, apricot-plum crosses (aprium, plumcot, pluots), black walnuts, chayotes, cherimoyas, chestnuts, feijoas, guavas, jojobas, jujubes, kumquats, limes, loquats, Macadamia nuts, persimmons, pomegranates, prickly pears, quince, citrus by-products, and orchard Bio mass.

### Non-Citrus Fruit Unutilized Production, 1993-2002

| Crop                    | 1993   | 1994   | 1995   | 1996   | 1997   | 1998   | 1999   | 2000   | 2001   | 2002   |
|-------------------------|--------|--------|--------|--------|--------|--------|--------|--------|--------|--------|
| Unharvested Tons        |        |        |        |        |        |        |        |        |        |        |
| Apples                  | ---    | ---    | ---    | ---    | ---    | ---    | ---    | 30,000 | 15,000 | ---    |
| Apricots                | ---    | 13,000 | ---    | ---    | 9,600  | 10,400 | ---    | 9,000  | 7,000  | 10,000 |
| Pears, Bartlett         | ---    | ---    | ---    | ---    | ---    | ---    | ---    | 15,000 | 35,000 | ---    |
| Harvested Tons Not Sold |        |        |        |        |        |        |        |        |        |        |
| Apples                  | ---    | ---    | ---    | ---    | ---    | ---    | ---    | ---    | ---    | 5,000  |
| Kiwifruit               | 4,600  | 1,900  | 4,200  | 3,500  | 3,200  | 3,600  | 3,000  | 3,500  | 2,800  | 3,000  |
| Peaches, Clingstone     | 30,000 | 23,500 | 22,000 | 26,000 | 24,000 | 7,150  | 15,100 | 23,500 | 25,000 | 25,000 |
| Plums, Dried (Prunes)   | ---    | ---    | ---    | ---    | 9,000  | 5,000  | 13,000 | 18,000 | 15,000 | 9,000  |

**Non-Citrus Fruit Utilized Production and Average Grower Return, 1993-2002**

| Crop               | Crop Year | Utilized Production | Fresh Market |               | Processing  |               |             |               |
|--------------------|-----------|---------------------|--------------|---------------|-------------|---------------|-------------|---------------|
|                    |           |                     |              |               | Total       |               | Canned      |               |
|                    |           | <i>Short Tons</i>   | Quantity     | Value         | Quantity    | Value         | Quantity    | Value         |
|                    |           |                     | <i>Tons</i>  | <i>\$/Ton</i> | <i>Tons</i> | <i>\$/Ton</i> | <i>Tons</i> | <i>\$/Ton</i> |
| Apples 1/          | 1993      | 440,000             | 185,000      | 574.00        | 255,000     | 126.00        | 20,500      | 152.00        |
|                    | 1994      | 525,000             | 175,000      | 568.00        | 350,000     | 113.00        | 45,000      | 145.00        |
|                    | 1995      | 425,000             | 150,000      | 734.00        | 275,000     | 165.00        | 37,500      | 150.00        |
|                    | 1996      | 475,000             | 175,000      | 646.00        | 300,000     | 150.00        | 48,500      | 184.00        |
|                    | 1997      | 481,000             | 187,500      | 664.00        | 293,500     | 130.00        | 37,500      | 144.00        |
|                    | 1998      | 430,000             | 200,000      | 544.00        | 230,000     | 98.00         | 10,000      | 144.00        |
|                    | 1999      | 448,000             | 210,000      | 496.00        | 238,000     | 158.00        | 20,000      | 148.00        |
|                    | 2000      | 255,000             | 130,000      | 486.00        | 125,000     | 162.00        | 3,000       | 152.00        |
|                    | 2001      | 245,000             | 110,000      | 458.00        | 135,000     | 198.00        | 8,500       | 146.00        |
|                    | 2002      | 230,000             | 115,000      | 606.00        | 115,000     | 210.00        | 11,000      | 208.00        |
| Apricots           | 1993      | 89,000              | 14,500       | 711.00        | 74,500      | 295.00        | 45,000      | 266.00        |
|                    | 1994      | 132,000             | 20,000       | 477.00        | 112,000     | 305.00        | 71,000      | 303.00        |
|                    | 1995      | 54,000              | 11,000       | 748.00        | 43,000      | 295.00        | 19,200      | 310.00        |
|                    | 1996      | 76,000              | 10,500       | 1,080.00      | 65,500      | 295.00        | 20,000      | 320.00        |
|                    | 1997      | 122,400             | 20,900       | 467.00        | 101,500     | 275.00        | 46,700      | 320.00        |
|                    | 1998      | 102,600             | 18,500       | 533.00        | 84,100      | 262.00        | 40,700      | 330.00        |
|                    | 1999      | 85,000              | 21,000       | 563.00        | 64,000      | 295.00        | 33,500      | 330.00        |
|                    | 2000      | 81,000              | 21,000       | 459.00        | 60,000      | 288.00        | 32,000      | 322.00        |
|                    | 2001      | 70,000              | 14,000       | 551.00        | 56,000      | 260.00        | 31,000      | 292.00        |
|                    | 2002      | 75,000              | 14,000       | 490.00        | 61,000      | 271.00        | 30,500      | 286.00        |
| Avocados 2/        | 92-93     | 284,000             | 265,000      | 400.00        | 19,000      | ---           | ---         | ---           |
|                    | 93-94     | 139,000             | 132,000      | 1,810.00      | 7,000       | ---           | ---         | ---           |
|                    | 94-95     | 155,000             | 153,500      | 1,490.00      | 1,500       | ---           | ---         | ---           |
|                    | 95-96     | 171,000             | 169,500      | 1,380.00      | 1,500       | ---           | ---         | ---           |
|                    | 96-97     | 167,000             | 165,000      | 1,570.00      | 2,000       | ---           | ---         | ---           |
|                    | 97-98     | 154,000             | 152,500      | 1,720.00      | 1,500       | ---           | ---         | ---           |
|                    | 98-99     | 136,000             | 136,000      | 2,400.00      | ---         | ---           | ---         | ---           |
|                    | 99-00     | 161,000             | 161,000      | 2,110.00      | ---         | ---           | ---         | ---           |
|                    | 00-01     | 213,000             | 213,000      | 1,480.00      | ---         | ---           | ---         | ---           |
|                    | 01-02     | 200,000             | 200,000      | 1,790.00      | ---         | ---           | ---         | ---           |
| Cherries, Sweet 3/ | 1993      | 19,000              | 14,500       | 2,820.00      | 4,500       | 514.00        | ---         | ---           |
|                    | 1994      | 52,000              | 36,000       | 1,550.00      | 16,000      | 482.00        | ---         | ---           |
|                    | 1995      | 19,800              | 11,000       | 3,410.00      | 8,800       | 458.00        | ---         | ---           |
|                    | 1996      | 24,600              | 16,000       | 2,540.00      | 8,600       | 557.00        | ---         | ---           |
|                    | 1997      | 49,200              | 31,600       | 1,570.00      | 17,600      | 782.00        | ---         | ---           |
|                    | 1998      | 15,200              | 7,500        | 2,330.00      | 7,700       | 784.00        | ---         | ---           |
|                    | 1999      | 79,500              | 54,200       | 1,040.00      | 25,300      | 494.00        | ---         | ---           |
|                    | 2000      | 45,700              | 29,600       | 2,180.00      | 16,100      | 437.00        | ---         | ---           |
|                    | 2001      | 51,100              | 41,300       | 1,840.00      | 9,800       | 390.00        | ---         | ---           |
|                    | 2002      | 53,700              | 43,300       | 2,090.00      | 10,400      | 271.00        | ---         | ---           |
| Dates              | 1993      | 29,000              | 29,000       | 790.00        | ---         | ---           | ---         | ---           |
|                    | 1994      | 23,000              | 23,000       | 750.00        | ---         | ---           | ---         | ---           |
|                    | 1995      | 22,700              | 22,700       | 780.00        | ---         | ---           | ---         | ---           |
|                    | 1996      | 23,000              | 23,000       | 1,090.00      | ---         | ---           | ---         | ---           |
|                    | 1997      | 21,000              | 21,000       | 1,100.00      | ---         | ---           | ---         | ---           |
|                    | 1998      | 24,900              | 24,900       | 1,220.00      | ---         | ---           | ---         | ---           |
|                    | 1999      | 22,200              | 22,200       | 1,240.00      | ---         | ---           | ---         | ---           |
|                    | 2000      | 17,400              | 17,400       | 1,230.00      | ---         | ---           | ---         | ---           |
|                    | 2001      | 19,700              | 19,700       | 1,360.00      | ---         | ---           | ---         | ---           |
|                    | 2002      | 24,200              | 24,200       | 1,550.00      | ---         | ---           | ---         | ---           |

**Non-Citrus Fruit Utilized Production and Average Grower Return, 1993-2002**

| Crop              | Crop Year | Utilized Production | Fresh Market |               | Processing  |               |             |               |
|-------------------|-----------|---------------------|--------------|---------------|-------------|---------------|-------------|---------------|
|                   |           |                     |              |               | Total       |               | Canned      |               |
|                   |           | <i>Short Tons</i>   | Quantity     | Value         | Quantity    | Value         | Quantity    | Value         |
|                   |           |                     | <i>Tons</i>  | <i>\$/Ton</i> | <i>Tons</i> | <i>\$/Ton</i> | <i>Tons</i> | <i>\$/Ton</i> |
| Figs 4/           | 1993      | 60,700              | 2,800        | ---           | 57,900      | ---           | ---         | ---           |
|                   | 1994      | 56,700              | 2,100        | ---           | 54,600      | ---           | ---         | ---           |
|                   | 1995      | 52,400              | 2,000        | ---           | 50,400      | ---           | ---         | ---           |
|                   | 1996      | 45,500              | 2,000        | ---           | 43,500      | ---           | ---         | ---           |
|                   | 1997      | 57,500              | 2,000        | ---           | 55,500      | ---           | ---         | ---           |
|                   | 1998      | 51,300              | 1,800        | ---           | 49,500      | ---           | ---         | ---           |
|                   | 1999      | 47,300              | 2,000        | ---           | 45,300      | ---           | ---         | ---           |
|                   | 2000      | 55,900              | 4,000        | ---           | 51,900      | ---           | ---         | ---           |
|                   | 2001      | 41,000              | 2,000        | ---           | 39,000      | ---           | ---         | ---           |
|                   | 2002      | 54,400              | 2,500        | ---           | 51,900      | ---           | ---         | ---           |
| Grapes, Raisin 5/ | 1993      | 2,354,000           | 270,000      | 630.00        | 2,084,000   | 206.00        | 45,000      | 256.00        |
|                   | 1994      | 2,389,000           | 270,000      | 472.00        | 2,119,000   | 198.00        | 38,000      | 256.00        |
|                   | 1995      | 2,252,000           | 253,000      | 579.00        | 1,999,000   | 190.00        | 35,000      | 257.00        |
|                   | 1996      | 2,192,000           | 230,000      | 669.00        | 1,962,000   | 235.00        | 36,000      | 267.00        |
|                   | 1997      | 2,883,000           | 275,000      | 759.00        | 2,608,000   | 210.00        | 44,000      | 268.00        |
|                   | 1998      | 2,077,000           | 230,000      | 715.00        | 1,847,000   | 238.00        | 36,000      | 270.00        |
|                   | 1999      | 2,122,000           | 240,000      | 704.00        | 1,882,000   | 272.00        | 35,000      | 270.00        |
|                   | 2000      | 2,921,000           | 230,000      | 600.00        | 2,691,000   | 129.00        | 32,000      | 270.00        |
|                   | 2001      | 2,215,000           | 217,000      | 680.00        | 1,998,000   | 128.00        | 29,000      | 270.00        |
|                   | 2002      | 2,833,000           | 264,000      | 750.00        | 2,569,000   | 93.60         | 31,000      | 270.00        |
| Grapes, Table     | 1993      | 632,000             | 468,000      | 720.00        | 164,000     | 156.00        | ---         | ---           |
|                   | 1994      | 602,000             | 464,000      | 628.00        | 138,000     | 135.00        | ---         | ---           |
|                   | 1995      | 707,000             | 523,000      | 651.00        | 184,000     | 161.00        | ---         | ---           |
|                   | 1996      | 592,000             | 465,000      | 775.00        | 127,000     | 190.00        | ---         | ---           |
|                   | 1997      | 825,000             | 595,000      | 554.00        | 230,000     | 173.00        | ---         | ---           |
|                   | 1998      | 643,000             | 489,000      | 607.00        | 154,000     | 155.00        | ---         | ---           |
|                   | 1999      | 758,000             | 583,000      | 659.00        | 175,000     | 196.00        | ---         | ---           |
|                   | 2000      | 774,000             | 613,000      | 680.00        | 161,000     | 128.00        | ---         | ---           |
|                   | 2001      | 713,000             | 587,000      | 720.00        | 126,000     | 99.50         | ---         | ---           |
|                   | 2002      | 739,000             | 662,000      | 680.00        | 77,000      | 88.10         | ---         | ---           |
| Grapes, Wine      | 1993      | 2,397,000           | 36,000       | 325.00        | 2,361,000   | 362.00        | ---         | ---           |
|                   | 1994      | 2,265,000           | 45,000       | 471.00        | 2,220,000   | 376.00        | ---         | ---           |
|                   | 1995      | 2,275,000           | 45,000       | 238.00        | 2,230,000   | 428.00        | ---         | ---           |
|                   | 1996      | 2,225,000           | 45,000       | 333.00        | 2,180,000   | 540.00        | ---         | ---           |
|                   | 1997      | 2,940,000           | 45,000       | 250.00        | 2,895,000   | 603.00        | ---         | ---           |
|                   | 1998      | 2,570,000           | 42,000       | 250.00        | 2,528,000   | 586.00        | ---         | ---           |
|                   | 1999      | 2,662,000           | 45,000       | 275.00        | 2,617,000   | 590.00        | ---         | ---           |
|                   | 2000      | 3,364,000           | 45,000       | 300.00        | 3,319,000   | 571.00        | ---         | ---           |
|                   | 2001      | 3,051,000           | 45,000       | 300.00        | 3,006,000   | 601.00        | ---         | ---           |
|                   | 2002      | 3,149,000           | 45,000       | 300.00        | 3,104,000   | 538.00        | ---         | ---           |
| Grapes, All 5/    | 1993      | 5,383,000           | 774,000      | 670.00        | 4,609,000   | 284.00        | 45,000      | 256.00        |
|                   | 1994      | 5,256,000           | 779,000      | 565.00        | 4,477,000   | 284.00        | 38,000      | 256.00        |
|                   | 1995      | 5,234,000           | 821,000      | 606.00        | 4,413,000   | 309.00        | 35,000      | 257.00        |
|                   | 1996      | 5,009,000           | 740,000      | 715.00        | 4,269,000   | 389.00        | 36,000      | 267.00        |
|                   | 1997      | 6,648,000           | 915,000      | 601.00        | 5,733,000   | 407.00        | 44,000      | 268.00        |
|                   | 1998      | 5,290,000           | 761,000      | 620.00        | 4,529,000   | 429.00        | 36,000      | 270.00        |
|                   | 1999      | 5,542,000           | 868,000      | 652.00        | 4,674,000   | 447.00        | 35,000      | 270.00        |
|                   | 2000      | 7,059,000           | 888,000      | 640.00        | 6,171,000   | 367.00        | 32,000      | 270.00        |
|                   | 2001      | 5,979,000           | 849,000      | 688.00        | 5,130,000   | 404.00        | 29,000      | 270.00        |
|                   | 2002      | 6,721,000           | 971,000      | 681.00        | 5,750,000   | 333.00        | 31,000      | 270.00        |

**Non-Citrus Fruit Utilized Production and Average Grower Return, 1993-2002**

| Crop                     | Crop Year | Utilized Production | Fresh Market |        | Processing |        |          |        |
|--------------------------|-----------|---------------------|--------------|--------|------------|--------|----------|--------|
|                          |           |                     |              |        | Total      |        | Canned   |        |
|                          |           | Short Tons          | Quantity     | Value  | Quantity   | Value  | Quantity | Value  |
|                          |           |                     | Tons         | \$/Ton | Tons       | \$/Ton | Tons     | \$/Ton |
| Kiwifruit 6/             | 1993      | 44,600              | 44,600       | ---    | ---        | ---    | ---      | ---    |
|                          | 1994      | 37,500              | 37,500       | ---    | ---        | ---    | ---      | ---    |
|                          | 1995      | 33,600              | 32,500       | ---    | 1,100      | ---    | ---      | ---    |
|                          | 1996      | 28,000              | 26,100       | ---    | 1,900      | ---    | ---      | ---    |
|                          | 1997      | 31,800              | 31,300       | ---    | 500        | ---    | ---      | ---    |
|                          | 1998      | 33,000              | 32,000       | ---    | 1,000      | ---    | ---      | ---    |
|                          | 1999      | 24,000              | 23,100       | ---    | 900        | ---    | ---      | ---    |
|                          | 2000      | 30,500              | 28,500       | ---    | 2,000      | ---    | ---      | ---    |
|                          | 2001      | 23,000              | 22,200       | ---    | 800        | ---    | ---      | ---    |
|                          | 2002      | 23,100              | 22,300       | ---    | 800        | ---    | ---      | ---    |
| Nectarines 6/            | 1993      | 205,000             | 201,000      | ---    | 4,000      | ---    | ---      | ---    |
|                          | 1994      | 242,000             | 238,000      | ---    | 4,000      | ---    | ---      | ---    |
|                          | 1995      | 176,000             | 170,000      | ---    | 6,000      | ---    | ---      | ---    |
|                          | 1996      | 247,000             | 239,800      | ---    | 7,200      | ---    | ---      | ---    |
|                          | 1997      | 264,000             | 258,500      | ---    | 5,500      | ---    | ---      | ---    |
|                          | 1998      | 224,000             | 207,600      | ---    | 16,400     | ---    | ---      | ---    |
|                          | 1999      | 274,000             | 256,300      | ---    | 17,700     | ---    | ---      | ---    |
|                          | 2000      | 267,000             | 260,700      | ---    | 6,300      | ---    | ---      | ---    |
|                          | 2001      | 275,000             | 265,400      | ---    | 9,600      | ---    | ---      | ---    |
|                          | 2002      | 299,000             | 299,000      | ---    | ---        | ---    | ---      | ---    |
| Olives                   | 1993      | 122,000             | 500          | 500.00 | 121,500    | 467.00 | 93,000   | 558.00 |
|                          | 1994      | 84,000              | 500          | 500.00 | 83,500     | 464.00 | 66,500   | 551.00 |
|                          | 1995      | 77,500              | 500          | 500.00 | 77,000     | 647.00 | 58,500   | 779.00 |
|                          | 1996      | 166,000             | 500          | 500.00 | 165,500    | 617.00 | 123,000  | 745.00 |
|                          | 1997      | 104,000             | 500          | 500.00 | 103,500    | 643.00 | 82,200   | 760.00 |
|                          | 1998      | 90,000              | 500          | 500.00 | 89,500     | 459.00 | 64,200   | 590.00 |
|                          | 1999      | 142,000             | 500          | 500.00 | 141,500    | 387.00 | 86,000   | 513.00 |
|                          | 2000      | 53,000              | 500          | 500.00 | 52,500     | 657.00 | 41,400   | 769.00 |
|                          | 2001      | 134,000             | 500          | 500.00 | 133,500    | 673.00 | 109,700  | 770.00 |
|                          | 2002      | 103,000             | 500          | 500.00 | 102,500    | 590.00 | 82,800   | 675.00 |
| Peaches, Clingstone 7/   | 1993      | 518,500             | ---          | ---    | 518,500    | 218.00 | 485,500  | 224.00 |
|                          | 1994      | 541,500             | ---          | ---    | 541,500    | 180.00 | 493,500  | 189.00 |
|                          | 1995      | 410,500             | ---          | ---    | 410,500    | 213.00 | 381,500  | 220.00 |
|                          | 1996      | 520,500             | ---          | ---    | 520,500    | 219.00 | 480,500  | 220.00 |
|                          | 1997      | 550,000             | ---          | ---    | 550,000    | 260.00 | 529,000  | 264.00 |
|                          | 1998      | 515,350             | ---          | ---    | 515,350    | 219.00 | 469,500  | 230.00 |
|                          | 1999      | 514,400             | ---          | ---    | 514,400    | 225.00 | 476,200  | 232.00 |
|                          | 2000      | 508,500             | ---          | ---    | 508,500    | 250.00 | 486,950  | 251.00 |
|                          | 2001      | 451,000             | ---          | ---    | 451,000    | 244.00 | 435,100  | 244.00 |
|                          | 2002      | 537,000             | ---          | ---    | 537,000    | 247.00 | 511,500  | 244.00 |
| Peaches, Freestone 8/ 9/ | 1993      | 301,500             | 193,000      | 370.00 | 108,500    | 172.00 | 14,700   | 196.00 |
|                          | 1994      | 317,000             | 220,000      | 232.00 | 97,000     | 174.00 | 15,100   | 205.00 |
|                          | 1995      | 251,000             | 161,300      | 482.00 | 89,700     | 172.00 | 11,000   | 190.00 |
|                          | 1996      | 337,000             | 229,350      | 560.00 | 107,650    | 166.00 | 9,100    | 204.00 |
|                          | 1997      | 369,500             | 249,050      | 276.00 | 120,450    | 194.00 | 10,650   | 246.00 |
|                          | 1998      | 340,500             | 215,800      | 396.00 | 124,700    | 186.00 | 12,750   | 215.00 |
|                          | 1999      | 381,500             | 254,150      | 396.00 | 127,350    | 171.00 | 10,800   | 216.00 |
|                          | 2000      | 395,500             | 269,000      | 380.00 | 126,500    | 176.00 | ---      | ---    |
|                          | 2001      | 387,500             | 269,000      | 428.00 | 118,500    | 182.00 | ---      | ---    |
|                          | 2002      | 398,000             | 277,850      | 418.00 | 120,150    | 185.00 | ---      | ---    |



**Non-Citrus Fruit Utilized Production and Average Grower Return, 1993-2002**

| Crop                   | Crop Year | Utilized Production | Fresh Market |        | Processing |        |          |        |
|------------------------|-----------|---------------------|--------------|--------|------------|--------|----------|--------|
|                        |           |                     |              |        | Total      |        | Canned   |        |
|                        |           | Short Tons          | Quantity     | Value  | Quantity   | Value  | Quantity | Value  |
|                        |           |                     | Tons         | \$/Ton | Tons       | \$/Ton | Tons     | \$/Ton |
| Peaches, All 7/ 10/    | 1993      | 820,000             | 193,000      | 370.00 | 627,000    | 210.00 | 500,200  | 223.00 |
|                        | 1994      | 858,500             | 220,000      | 232.00 | 638,500    | 179.00 | 508,600  | 189.00 |
|                        | 1995      | 661,500             | 161,300      | 482.00 | 500,200    | 206.00 | 392,500  | 219.00 |
|                        | 1996      | 857,500             | 229,350      | 560.00 | 628,150    | 210.00 | 489,600  | 220.00 |
|                        | 1997      | 919,500             | 249,050      | 276.00 | 670,450    | 248.00 | 539,650  | 264.00 |
|                        | 1998      | 855,850             | 215,800      | 396.00 | 640,050    | 213.00 | 482,250  | 230.00 |
|                        | 1999      | 895,900             | 254,150      | 396.00 | 641,750    | 214.00 | 487,000  | 232.00 |
|                        | 2000      | 904,000             | 269,000      | 380.00 | 635,000    | 235.00 | 486,950  | 251.00 |
|                        | 2001      | 838,500             | 269,000      | 428.00 | 569,500    | 231.00 | 435,100  | 244.00 |
|                        | 2002      | 935,000             | 277,850      | 418.00 | 657,150    | 236.00 | 511,500  | 244.00 |
| Pears, Bartlett 7/ 10/ | 1993      | 288,000             | 61,000       | 271.00 | 227,000    | 228.00 | ---      | ---    |
|                        | 1994      | 333,000             | 88,000       | 113.00 | 245,000    | 208.00 | ---      | ---    |
|                        | 1995      | 247,000             | 60,000       | 254.00 | 187,000    | 199.00 | ---      | ---    |
|                        | 1996      | 287,000             | 77,000       | 362.00 | 210,000    | 232.00 | ---      | ---    |
|                        | 1997      | 282,000             | 68,000       | 318.00 | 214,000    | 247.00 | ---      | ---    |
|                        | 1998      | 277,000             | 53,000       | 309.00 | 224,000    | 231.00 | ---      | ---    |
|                        | 1999      | 311,000             | 84,000       | 143.00 | 227,000    | 235.00 | ---      | ---    |
|                        | 2000      | 267,000             | 81,000       | 159.00 | 186,000    | 220.00 | ---      | ---    |
|                        | 2001      | 240,000             | 67,000       | 317.00 | 173,000    | 232.00 | ---      | ---    |
|                        | 2002      | 232,000             | 69,000       | 270.00 | 163,000    | 231.00 | ---      | ---    |
| Pears, Other 6/        | 1993      | 20,000              | ---          | ---    | ---        | ---    | ---      | ---    |
|                        | 1994      | 30,000              | ---          | ---    | ---        | ---    | ---      | ---    |
|                        | 1995      | 20,000              | ---          | ---    | ---        | ---    | ---      | ---    |
|                        | 1996      | 30,000              | ---          | ---    | ---        | ---    | ---      | ---    |
|                        | 1997      | 30,000              | ---          | ---    | ---        | ---    | ---      | ---    |
|                        | 1998      | 30,000              | ---          | ---    | ---        | ---    | ---      | ---    |
|                        | 1999      | 30,000              | ---          | ---    | ---        | ---    | ---      | ---    |
|                        | 2000      | 30,000              | ---          | ---    | ---        | ---    | ---      | ---    |
|                        | 2001      | 30,000              | ---          | ---    | ---        | ---    | ---      | ---    |
|                        | 2002      | 30,000              | ---          | ---    | ---        | ---    | ---      | ---    |
| Pears, All 6/          | 1993      | 308,000             | ---          | ---    | ---        | ---    | ---      | ---    |
|                        | 1994      | 363,000             | ---          | ---    | ---        | ---    | ---      | ---    |
|                        | 1995      | 267,000             | ---          | ---    | ---        | ---    | ---      | ---    |
|                        | 1996      | 317,000             | ---          | ---    | ---        | ---    | ---      | ---    |
|                        | 1997      | 312,000             | ---          | ---    | ---        | ---    | ---      | ---    |
|                        | 1998      | 307,000             | ---          | ---    | ---        | ---    | ---      | ---    |
|                        | 1999      | 341,000             | ---          | ---    | ---        | ---    | ---      | ---    |
|                        | 2000      | 297,000             | ---          | ---    | ---        | ---    | ---      | ---    |
|                        | 2001      | 270,000             | ---          | ---    | ---        | ---    | ---      | ---    |
|                        | 2002      | 262,000             | ---          | ---    | ---        | ---    | ---      | ---    |
| Plums 6/               | 1993      | 185,000             | ---          | ---    | ---        | ---    | ---      | ---    |
|                        | 1994      | 247,000             | ---          | ---    | ---        | ---    | ---      | ---    |
|                        | 1995      | 124,000             | ---          | ---    | ---        | ---    | ---      | ---    |
|                        | 1996      | 228,000             | ---          | ---    | ---        | ---    | ---      | ---    |
|                        | 1997      | 246,000             | ---          | ---    | ---        | ---    | ---      | ---    |
|                        | 1998      | 188,000             | ---          | ---    | ---        | ---    | ---      | ---    |
|                        | 1999      | 196,000             | ---          | ---    | ---        | ---    | ---      | ---    |
|                        | 2000      | 197,000             | ---          | ---    | ---        | ---    | ---      | ---    |
|                        | 2001      | 210,000             | ---          | ---    | ---        | ---    | ---      | ---    |
|                        | 2002      | 201,000             | ---          | ---    | ---        | ---    | ---      | ---    |

### Non-Citrus Fruit Utilized Production and Average Grower Return, 1993-2002

| Crop                  | Crop Year | Utilized Production | Fresh Market |        | Processing |          |          |        |
|-----------------------|-----------|---------------------|--------------|--------|------------|----------|----------|--------|
|                       |           |                     |              |        | Total      |          | Canned   |        |
|                       |           | Short Tons          | Quantity     | Value  | Quantity   | Value    | Quantity | Value  |
|                       |           |                     | Tons         | \$/Ton | Tons       | \$/Ton   | Tons     | \$/Ton |
| Plums, Dried (Prunes) |           |                     |              |        |            |          |          |        |
|                       | 1993      | 121,000             | ---          | ---    | 121,000    | 1,120.00 | ---      | ---    |
|                       | 1994      | 193,000             | ---          | ---    | 193,000    | 1,090.00 | ---      | ---    |
|                       | 1995      | 181,000             | ---          | ---    | 181,000    | 1,040.00 | ---      | ---    |
|                       | 1996      | 223,000             | ---          | ---    | 223,000    | 839.00   | ---      | ---    |
|                       | 1997      | 205,000             | ---          | ---    | 205,000    | 883.00   | ---      | ---    |
|                       | 1998      | 103,000             | ---          | ---    | 103,000    | 764.00   | ---      | ---    |
|                       | 1999      | 165,000             | ---          | ---    | 165,000    | 861.00   | ---      | ---    |
|                       | 2000      | 201,000             | ---          | ---    | 201,000    | 770.00   | ---      | ---    |
|                       | 2001      | 135,000             | ---          | ---    | 135,000    | 723.00   | ---      | ---    |
|                       | 2002      | 162,000             | ---          | ---    | 162,000    | 810.00   | ---      | ---    |

1/ Dried and frozen fruit included in total processed to avoid disclosure of individual operations.

2/ Processed fruit included in fresh market total to avoid disclosure of individual operations.

3/ Total processed includes canned, crushed, frozen and brined.

4/ Prices for processing and fresh totals were not published to avoid disclosure of individual operations. Small quantities processed included in fresh to avoid disclosure of individual operations.

5/ Includes substandard raisins diverted to other uses.

6/ Processed and fresh fruit not published to avoid disclosure of individual operations, but included in total utilized.

7/ Processed mostly canned, but includes other small quantities not published separately to avoid disclosure of individual operations.

8/ Quantity and value include dried, but price excludes dried.

9/ Not published separately to avoid disclosure of individual operations.

10/ Total processing value per ton excludes dried processing.

# **Non-Citrus Fruit Utilized Production and Average Grower Return, 1993-2002 (Continued)**

| Crop               | Crop Year | Processing       |               |             |               |                     |               |             |               |
|--------------------|-----------|------------------|---------------|-------------|---------------|---------------------|---------------|-------------|---------------|
|                    |           | Juice or Crushed |               | Frozen      |               | Dried (Fresh Basis) |               | Dried Basis |               |
|                    |           | Quantity         | Value         | Quantity    | Value         | Quantity            | Value         | Quantity    | Value         |
|                    |           | <i>Tons</i>      | <i>\$/Ton</i> | <i>Tons</i> | <i>\$/Ton</i> | <i>Tons</i>         | <i>\$/Ton</i> | <i>Tons</i> | <i>\$/Ton</i> |
| Apples 1/          | 1993      | 175,000          | 122.00        | ---         | ---           | ---                 | ---           | ---         | ---           |
|                    | 1994      | 250,000          | 110.00        | ---         | ---           | ---                 | ---           | ---         | ---           |
|                    | 1995      | 200,000          | 165.00        | ---         | ---           | ---                 | ---           | ---         | ---           |
|                    | 1996      | 209,000          | 137.00        | ---         | ---           | ---                 | ---           | ---         | ---           |
|                    | 1997      | 181,000          | 106.00        | ---         | ---           | ---                 | ---           | ---         | ---           |
|                    | 1998      | 160,000          | 88.00         | ---         | ---           | ---                 | ---           | ---         | ---           |
|                    | 1999      | 200,000          | 154.00        | ---         | ---           | ---                 | ---           | ---         | ---           |
|                    | 2000      | 112,500          | 156.00        | ---         | ---           | ---                 | ---           | ---         | ---           |
|                    | 2001      | 109,000          | 209.00        | ---         | ---           | ---                 | ---           | ---         | ---           |
|                    | 2002      | 99,000           | 213.00        | ---         | ---           | ---                 | ---           | ---         | ---           |
| Apricots           | 1993      | ---              | ---           | 11,500      | 315.00        | 18,000              | 353.00        | 2,730       | 2,320.00      |
|                    | 1994      | ---              | ---           | 10,500      | 350.00        | 30,500              | 295.00        | 4,800       | 1,890.00      |
|                    | 1995      | 8,500            | 230.00        | 5,700       | 300.00        | 9,600               | 321.00        | 1,480       | 2,090.00      |
|                    | 1996      | 21,500           | 245.00        | 9,000       | 310.00        | 15,000              | 325.00        | 2,170       | 2,240.00      |
|                    | 1997      | 27,700           | 190.00        | 15,100      | 300.00        | 12,000              | 262.00        | 1,740       | 1,810.00      |
|                    | 1998      | 24,000           | 125.00        | 10,400      | 315.00        | 9,000               | 258.00        | 1,250       | 1,860.00      |
|                    | 1999      | 13,000           | 200.00        | 10,500      | 315.00        | 7,000               | 271.00        | 1,160       | 1,630.00      |
|                    | 2000      | 10,000           | 169.00        | 10,000      | 298.00        | 8,000               | 260.00        | 1,120       | 1,860.00      |
|                    | 2001      | 9,000            | 102.00        | 9,000       | 308.00        | 6,000               | 268.00        | 820         | 1,960.00      |
|                    | 2002      | 7,000            | 158.00        | 10,500      | 299.00        | 8,000               | 223.00        | 1,120       | 1,590.00      |
| Avocados 2/        | 92-93     | ---              | ---           | ---         | ---           | ---                 | ---           | ---         | ---           |
|                    | 93-94     | ---              | ---           | ---         | ---           | ---                 | ---           | ---         | ---           |
|                    | 94-95     | ---              | ---           | ---         | ---           | ---                 | ---           | ---         | ---           |
|                    | 95-96     | ---              | ---           | ---         | ---           | ---                 | ---           | ---         | ---           |
|                    | 96-97     | ---              | ---           | ---         | ---           | ---                 | ---           | ---         | ---           |
|                    | 97-98     | ---              | ---           | ---         | ---           | ---                 | ---           | ---         | ---           |
|                    | 98-99     | ---              | ---           | ---         | ---           | ---                 | ---           | ---         | ---           |
|                    | 99-00     | ---              | ---           | ---         | ---           | ---                 | ---           | ---         | ---           |
|                    | 00-01     | ---              | ---           | ---         | ---           | ---                 | ---           | ---         | ---           |
|                    | 01-02     | ---              | ---           | ---         | ---           | ---                 | ---           | ---         | ---           |
| Cherries, Sweet 3/ | 1993      | ---              | ---           | ---         | ---           | ---                 | ---           | ---         | ---           |
|                    | 1994      | ---              | ---           | ---         | ---           | ---                 | ---           | ---         | ---           |
|                    | 1995      | ---              | ---           | ---         | ---           | ---                 | ---           | ---         | ---           |
|                    | 1996      | ---              | ---           | ---         | ---           | ---                 | ---           | ---         | ---           |
|                    | 1997      | ---              | ---           | ---         | ---           | ---                 | ---           | ---         | ---           |
|                    | 1998      | ---              | ---           | ---         | ---           | ---                 | ---           | ---         | ---           |
|                    | 1999      | ---              | ---           | ---         | ---           | ---                 | ---           | ---         | ---           |
|                    | 2000      | ---              | ---           | ---         | ---           | ---                 | ---           | ---         | ---           |
|                    | 2001      | ---              | ---           | ---         | ---           | ---                 | ---           | ---         | ---           |
|                    | 2002      | ---              | ---           | ---         | ---           | ---                 | ---           | ---         | ---           |
| Dates              | 1993      | ---              | ---           | ---         | ---           | ---                 | ---           | ---         | ---           |
|                    | 1994      | ---              | ---           | ---         | ---           | ---                 | ---           | ---         | ---           |
|                    | 1995      | ---              | ---           | ---         | ---           | ---                 | ---           | ---         | ---           |
|                    | 1996      | ---              | ---           | ---         | ---           | ---                 | ---           | ---         | ---           |
|                    | 1997      | ---              | ---           | ---         | ---           | ---                 | ---           | ---         | ---           |
|                    | 1998      | ---              | ---           | ---         | ---           | ---                 | ---           | ---         | ---           |
|                    | 1999      | ---              | ---           | ---         | ---           | ---                 | ---           | ---         | ---           |
|                    | 2000      | ---              | ---           | ---         | ---           | ---                 | ---           | ---         | ---           |
|                    | 2001      | ---              | ---           | ---         | ---           | ---                 | ---           | ---         | ---           |
|                    | 2002      | ---              | ---           | ---         | ---           | ---                 | ---           | ---         | ---           |

**Non-Citrus Fruit Utilized Production and Average Grower Return, 1993-2002 (Continued)**

| Crop              | Crop Year | Processing       |               |             |               |                     |               |             |               |
|-------------------|-----------|------------------|---------------|-------------|---------------|---------------------|---------------|-------------|---------------|
|                   |           | Juice or Crushed |               | Frozen      |               | Dried (Fresh Basis) |               | Dried Basis |               |
|                   |           | Quantity         | Value         | Quantity    | Value         | Quantity            | Value         | Quantity    | Value         |
|                   |           | <i>Tons</i>      | <i>\$/Ton</i> | <i>Tons</i> | <i>\$/Ton</i> | <i>Tons</i>         | <i>\$/Ton</i> | <i>Tons</i> | <i>\$/Ton</i> |
| Figs 4/           | 1993      | ---              | ---           | ---         | ---           | 57,900              | 367.00        | 19,300      | 1,100.00      |
|                   | 1994      | ---              | ---           | ---         | ---           | 54,600              | 400.00        | 18,200      | 1,200.00      |
|                   | 1995      | ---              | ---           | ---         | ---           | 50,400              | 298.00        | 16,800      | 895.00        |
|                   | 1996      | ---              | ---           | ---         | ---           | 43,500              | 258.00        | 14,500      | 774.00        |
|                   | 1997      | ---              | ---           | ---         | ---           | 55,500              | 233.00        | 18,500      | 699.00        |
|                   | 1998      | ---              | ---           | ---         | ---           | 49,500              | 198.00        | 16,500      | 594.00        |
|                   | 1999      | ---              | ---           | ---         | ---           | 45,300              | 227.00        | 15,100      | 681.00        |
|                   | 2000      | ---              | ---           | ---         | ---           | 51,900              | 224.00        | 17,300      | 672.00        |
|                   | 2001      | ---              | ---           | ---         | ---           | 39,000              | 308.00        | 13,000      | 924.00        |
|                   | 2002      | ---              | ---           | ---         | ---           | 51,900              | 290.00        | 17,300      | 871.00        |
| Grapes, Raisin 5/ | 1993      | 397,000          | 152.00        | ---         | ---           | 1,642,000           | 218.00        | 382,000     | 937.00        |
|                   | 1994      | 197,000          | 118.00        | ---         | ---           | 1,884,000           | 205.00        | 418,600     | 923.00        |
|                   | 1995      | 432,000          | 164.00        | ---         | ---           | 1,532,000           | 196.00        | 306,400     | 980.00        |
|                   | 1996      | 618,000          | 191.00        | ---         | ---           | 1,308,000           | 255.00        | 311,500     | 1,070.00      |
|                   | 1997      | 786,000          | 185.00        | ---         | ---           | 1,778,000           | 219.00        | 428,500     | 908.00        |
|                   | 1998      | 507,000          | 164.00        | ---         | ---           | 1,304,000           | 266.00        | 277,400     | 1,250.00      |
|                   | 1999      | 420,000          | 200.00        | ---         | ---           | 1,427,000           | 293.00        | 342,300     | 1,220.00      |
|                   | 2000      | 513,000          | 125.00        | ---         | ---           | 2,146,000           | 128.00        | 484,500     | 569.00        |
|                   | 2001      | 262,000          | 85.70         | ---         | ---           | 1,707,000           | 132.00        | 411,300     | 548.00        |
|                   | 2002      | 622,000          | 75.50         | ---         | ---           | 1,916,000           | 96.70         | 425,800     | 435.00        |
| Grapes, Table     | 1993      | 137,000          | 147.00        | ---         | ---           | 27,000              | 204.00        | 6,300       | 874.00        |
|                   | 1994      | 123,000          | 136.00        | ---         | ---           | 15,000              | 125.00        | 3,400       | 550.00        |
|                   | 1995      | 170,000          | 162.00        | ---         | ---           | 14,000              | 150.00        | 2,800       | 750.00        |
|                   | 1996      | 117,000          | 188.00        | ---         | ---           | 10,000              | 210.00        | 2,400       | 880.00        |
|                   | 1997      | 212,000          | 169.00        | ---         | ---           | 18,000              | 220.00        | 4,300       | 914.00        |
|                   | 1998      | 136,000          | 150.00        | ---         | ---           | 18,000              | 197.00        | 3,800       | 933.00        |
|                   | 1999      | 150,000          | 187.00        | ---         | ---           | 25,000              | 247.00        | 6,000       | 1,030.00      |
|                   | 2000      | 120,000          | 118.00        | ---         | ---           | 41,000              | 157.00        | 9,200       | 700.00        |
|                   | 2001      | 101,000          | 87.20         | ---         | ---           | 25,000              | 149.00        | 5,800       | 644.00        |
|                   | 2002      | 61,000           | 80.50         | ---         | ---           | 16,000              | 117.00        | 3,600       | 520.00        |
| Grapes, Wine      | 1993      | 2,361,000        | 362.00        | ---         | ---           | ---                 | ---           | ---         | ---           |
|                   | 1994      | 2,220,000        | 376.00        | ---         | ---           | ---                 | ---           | ---         | ---           |
|                   | 1995      | 2,230,000        | 428.00        | ---         | ---           | ---                 | ---           | ---         | ---           |
|                   | 1996      | 2,180,000        | 540.00        | ---         | ---           | ---                 | ---           | ---         | ---           |
|                   | 1997      | 2,895,000        | 603.00        | ---         | ---           | ---                 | ---           | ---         | ---           |
|                   | 1998      | 2,528,000        | 586.00        | ---         | ---           | ---                 | ---           | ---         | ---           |
|                   | 1999      | 2,617,000        | 590.00        | ---         | ---           | ---                 | ---           | ---         | ---           |
|                   | 2000      | 3,319,000        | 571.00        | ---         | ---           | ---                 | ---           | ---         | ---           |
|                   | 2001      | 3,006,000        | 601.00        | ---         | ---           | ---                 | ---           | ---         | ---           |
|                   | 2002      | 3,104,000        | 538.00        | ---         | ---           | ---                 | ---           | ---         | ---           |
| Grapes, All 5/    | 1993      | 2,895,000        | 323.00        | ---         | ---           | 1,669,000           | 218.00        | 388,300     | 936.00        |
|                   | 1994      | 2,540,000        | 344.00        | ---         | ---           | 1,899,000           | 204.00        | 422,000     | 920.00        |
|                   | 1995      | 2,832,000        | 372.00        | ---         | ---           | 1,546,000           | 196.00        | 309,200     | 978.00        |
|                   | 1996      | 2,915,000        | 452.00        | ---         | ---           | 1,318,000           | 255.00        | 313,900     | 1,070.00      |
|                   | 1997      | 3,893,000        | 495.00        | ---         | ---           | 1,796,000           | 219.00        | 432,800     | 908.00        |
|                   | 1998      | 3,171,000        | 500.00        | ---         | ---           | 1,322,000           | 265.00        | 281,200     | 1,250.00      |
|                   | 1999      | 3,187,000        | 520.00        | ---         | ---           | 1,452,000           | 292.00        | 348,300     | 1,220.00      |
|                   | 2000      | 3,952,000        | 499.00        | ---         | ---           | 2,187,000           | 129.00        | 493,700     | 571.00        |
|                   | 2001      | 3,369,000        | 546.00        | ---         | ---           | 1,732,000           | 132.00        | 417,100     | 549.00        |
|                   | 2002      | 3,787,000        | 455.00        | ---         | ---           | 1,932,000           | 96.90         | 429,400     | 436.00        |

**Non-Citrus Fruit Utilized Production and Average Grower Return, 1993-2002 (Continued)**

| Crop                     | Crop Year | Processing       |               |                |               |                     |               |             |               |
|--------------------------|-----------|------------------|---------------|----------------|---------------|---------------------|---------------|-------------|---------------|
|                          |           | Juice or Crushed |               | Frozen         |               | Dried (Fresh Basis) |               | Dried Basis |               |
|                          |           | Quantity         | Value         | Quantity       | Value         | Quantity            | Value         | Quantity    | Value         |
|                          |           | <i>Tons</i>      | <i>\$/Ton</i> | <i>Tons</i>    | <i>\$/Ton</i> | <i>Tons</i>         | <i>\$/Ton</i> | <i>Tons</i> | <i>\$/Ton</i> |
| Kiwifruit                | 1993      | ---              | ---           | ---            | ---           | ---                 | ---           | ---         | ---           |
|                          | 1994      | ---              | ---           | ---            | ---           | ---                 | ---           | ---         | ---           |
|                          | 1995      | ---              | ---           | ---            | ---           | ---                 | ---           | ---         | ---           |
|                          | 1996      | ---              | ---           | ---            | ---           | ---                 | ---           | ---         | ---           |
|                          | 1997      | ---              | ---           | ---            | ---           | ---                 | ---           | ---         | ---           |
|                          | 1998      | ---              | ---           | ---            | ---           | ---                 | ---           | ---         | ---           |
|                          | 1999      | ---              | ---           | ---            | ---           | ---                 | ---           | ---         | ---           |
|                          | 2000      | ---              | ---           | ---            | ---           | ---                 | ---           | ---         | ---           |
|                          | 2001      | ---              | ---           | ---            | ---           | ---                 | ---           | ---         | ---           |
|                          | 2002      | ---              | ---           | ---            | ---           | ---                 | ---           | ---         | ---           |
| Nectarines 6/            | 1993      | ---              | ---           | ---            | ---           | ---                 | ---           | ---         | ---           |
|                          | 1994      | ---              | ---           | ---            | ---           | ---                 | ---           | ---         | ---           |
|                          | 1995      | ---              | ---           | ---            | ---           | ---                 | ---           | ---         | ---           |
|                          | 1996      | ---              | ---           | ---            | ---           | ---                 | ---           | ---         | ---           |
|                          | 1997      | ---              | ---           | ---            | ---           | ---                 | ---           | ---         | ---           |
|                          | 1998      | ---              | ---           | ---            | ---           | ---                 | ---           | ---         | ---           |
|                          | 1999      | ---              | ---           | ---            | ---           | ---                 | ---           | ---         | ---           |
|                          | 2000      | ---              | ---           | ---            | ---           | ---                 | ---           | ---         | ---           |
|                          | 2001      | ---              | ---           | ---            | ---           | ---                 | ---           | ---         | ---           |
|                          | 2002      | ---              | ---           | ---            | ---           | ---                 | ---           | ---         | ---           |
| Olives                   |           |                  |               | <i>Limited</i> |               | <i>Undersize</i>    |               |             |               |
|                          | 1993      | 5,300            | 10.50         | 19,700         | 235.00        | 3,500               | 37.20         | ---         | ---           |
|                          | 1994      | 4,400            | 11.00         | 8,400          | 234.00        | 4,200               | 14.00         | ---         | ---           |
|                          | 1995      | 4,000            | 11.00         | 9,300          | 443.00        | 5,200               | 16.00         | ---         | ---           |
|                          | 1996      | 7,000            | 11.00         | 29,000         | 355.00        | 6,500               | 11.00         | ---         | ---           |
|                          | 1997      | 3,600            | 11.00         | 10,200         | 386.00        | 7,500               | 11.00         | ---         | ---           |
|                          | 1998      | 4,100            | 11.00         | 12,800         | 240.00        | 8,400               | 11.00         | ---         | ---           |
|                          | 1999      | 5,000            | 200.00        | 36,500         | 259.00        | 14,000              | 11.00         | ---         | ---           |
|                          | 2000      | 3,000            | 300.00        | 5,100          | 333.00        | 3,000               | 11.00         | ---         | ---           |
|                          | 2001      | 3,000            | 300.00        | 15,300         | 287.00        | 5,500               | 6.00          | ---         | ---           |
|                          | 2002      | 6,000            | 240.00        | 9,900          | 309.00        | 3,800               | 17.00         | ---         | ---           |
| Peaches, Clingstone 7/   | 1993      | ---              | ---           | ---            | ---           | ---                 | ---           | ---         | ---           |
|                          | 1994      | ---              | ---           | ---            | ---           | ---                 | ---           | ---         | ---           |
|                          | 1995      | ---              | ---           | ---            | ---           | ---                 | ---           | ---         | ---           |
|                          | 1996      | ---              | ---           | ---            | ---           | ---                 | ---           | ---         | ---           |
|                          | 1997      | ---              | ---           | ---            | ---           | ---                 | ---           | ---         | ---           |
|                          | 1998      | ---              | ---           | ---            | ---           | ---                 | ---           | ---         | ---           |
|                          | 1999      | ---              | ---           | ---            | ---           | ---                 | ---           | ---         | ---           |
|                          | 2000      | ---              | ---           | ---            | ---           | ---                 | ---           | ---         | ---           |
|                          | 2001      | ---              | ---           | ---            | ---           | ---                 | ---           | ---         | ---           |
|                          | 2002      | ---              | ---           | ---            | ---           | ---                 | ---           | ---         | ---           |
| Peaches, Freestone 8/ 9/ | 1993      | ---              | ---           | 78,800         | 185.00        | 15,000              | 82.00         | 1,850       | 713.00        |
|                          | 1994      | ---              | ---           | 68,400         | 183.00        | 13,500              | 93.00         | 1,450       | 856.00        |
|                          | 1995      | ---              | ---           | 63,700         | 186.00        | 14,000              | 86.00         | 1,550       | 894.00        |
|                          | 1996      | ---              | ---           | 77,850         | 186.00        | 16,350              | 78.00         | 1,700       | 726.00        |
|                          | 1997      | ---              | ---           | 89,450         | 190.00        | 17,050              | 68.00         | 1,894       | 612.00        |
|                          | 1998      | ---              | ---           | 81,900         | 200.00        | 12,500              | 67.50         | 1,551       | 544.50        |
|                          | 1999      | ---              | ---           | 87,100         | 201.00        | 15,700              | 73.00         | 1,849       | 619.50        |
|                          | 2000      | ---              | ---           | 92,650         | 200.00        | 12,600              | 78.00         | 1,350       | 728.00        |
|                          | 2001      | ---              | ---           | 86,000         | 214.00        | 14,600              | 51.00         | 1,450       | 514.00        |
|                          | 2002      | ---              | ---           | 91,100         | 205.00        | 14,200              | 49.00         | 1,525       | 456.00        |

**Non-Citrus Fruit Utilized Production and Average Grower Return, 1993-2002 (Continued)**

| Crop                      | Crop Year | Processing       |        |          |        |                     |        |             |          |
|---------------------------|-----------|------------------|--------|----------|--------|---------------------|--------|-------------|----------|
|                           |           | Juice or Crushed |        | Frozen   |        | Dried (Fresh Basis) |        | Dried Basis |          |
|                           |           | Quantity         | Value  | Quantity | Value  | Quantity            | Value  | Quantity    | Value    |
|                           |           | Tons             | \$/Ton | Tons     | \$/Ton | Tons                | \$/Ton | Tons        | \$/Ton   |
| Peaches, All 7/ 8/ 9/ 10/ |           |                  |        |          |        |                     |        |             |          |
|                           | 1993      | ---              | ---    | 78,800   | 185.00 | 15,000              | 82.00  | 1,850       | 713.00   |
|                           | 1994      | ---              | ---    | 68,400   | 183.00 | 13,500              | 93.00  | 1,450       | 856.00   |
|                           | 1995      | ---              | ---    | 63,700   | 186.00 | 14,000              | 86.00  | 1,550       | 894.00   |
|                           | 1996      | ---              | ---    | 77,850   | 186.00 | 16,350              | 78.00  | 1,700       | 726.00   |
|                           | 1997      | ---              | ---    | 89,450   | 190.00 | 17,050              | 68.00  | 1,894       | 612.00   |
|                           | 1998      | ---              | ---    | 81,900   | 200.00 | 12,500              | 67.50  | 1,551       | 544.50   |
|                           | 1999      | ---              | ---    | 87,100   | 201.00 | 15,700              | 73.00  | 1,849       | 619.50   |
|                           | 2000      | ---              | ---    | 92,650   | 200.00 | 12,600              | 78.00  | 1,350       | 728.00   |
|                           | 2001      | ---              | ---    | 86,000   | 214.00 | 14,600              | 51.00  | 1,450       | 514.00   |
|                           | 2002      | ---              | ---    | 91,100   | 205.00 | 14,200              | 49.00  | 1,525       | 456.00   |
| Pears, Bartlett 7/ 10/    |           |                  |        |          |        |                     |        |             |          |
|                           | 1993      | ---              | ---    | ---      | ---    | 9,700               | 149.00 | 1,500       | 970.00   |
|                           | 1994      | ---              | ---    | ---      | ---    | 8,000               | 152.00 | 1,300       | 942.00   |
|                           | 1995      | ---              | ---    | ---      | ---    | 4,900               | 150.00 | 800         | 919.00   |
|                           | 1996      | ---              | ---    | ---      | ---    | 4,900               | 184.00 | 700         | 1,290.00 |
|                           | 1997      | ---              | ---    | ---      | ---    | 5,400               | 151.00 | 800         | 1,020.00 |
|                           | 1998      | ---              | ---    | ---      | ---    | 7,600               | 217.00 | 1,100       | 1,500.00 |
|                           | 1999      | ---              | ---    | ---      | ---    | 7,000               | 150.00 | 1,010       | 1,040.00 |
|                           | 2000      | ---              | ---    | ---      | ---    | 4,000               | 136.00 | 600         | 909.00   |
|                           | 2001      | ---              | ---    | ---      | ---    | 3,000               | 202.00 | 500         | 1,210.00 |
|                           | 2002      | ---              | ---    | ---      | ---    | 3,000               | 202.00 | 460         | 1,315.00 |
| Pears, Other 6/           |           |                  |        |          |        |                     |        |             |          |
|                           | 1993      | ---              | ---    | ---      | ---    | ---                 | ---    | ---         | ---      |
|                           | 1994      | ---              | ---    | ---      | ---    | ---                 | ---    | ---         | ---      |
|                           | 1995      | ---              | ---    | ---      | ---    | ---                 | ---    | ---         | ---      |
|                           | 1996      | ---              | ---    | ---      | ---    | ---                 | ---    | ---         | ---      |
|                           | 1997      | ---              | ---    | ---      | ---    | ---                 | ---    | ---         | ---      |
|                           | 1998      | ---              | ---    | ---      | ---    | ---                 | ---    | ---         | ---      |
|                           | 1999      | ---              | ---    | ---      | ---    | ---                 | ---    | ---         | ---      |
|                           | 2000      | ---              | ---    | ---      | ---    | ---                 | ---    | ---         | ---      |
|                           | 2001      | ---              | ---    | ---      | ---    | ---                 | ---    | ---         | ---      |
|                           | 2002      | ---              | ---    | ---      | ---    | ---                 | ---    | ---         | ---      |
| Pears, All 6/             |           |                  |        |          |        |                     |        |             |          |
|                           | 1993      | ---              | ---    | ---      | ---    | ---                 | ---    | ---         | ---      |
|                           | 1994      | ---              | ---    | ---      | ---    | ---                 | ---    | ---         | ---      |
|                           | 1995      | ---              | ---    | ---      | ---    | ---                 | ---    | ---         | ---      |
|                           | 1996      | ---              | ---    | ---      | ---    | ---                 | ---    | ---         | ---      |
|                           | 1997      | ---              | ---    | ---      | ---    | ---                 | ---    | ---         | ---      |
|                           | 1998      | ---              | ---    | ---      | ---    | ---                 | ---    | ---         | ---      |
|                           | 1999      | ---              | ---    | ---      | ---    | ---                 | ---    | ---         | ---      |
|                           | 2000      | ---              | ---    | ---      | ---    | ---                 | ---    | ---         | ---      |
|                           | 2001      | ---              | ---    | ---      | ---    | ---                 | ---    | ---         | ---      |
|                           | 2002      | ---              | ---    | ---      | ---    | ---                 | ---    | ---         | ---      |
| Plums 6/                  |           |                  |        |          |        |                     |        |             |          |
|                           | 1993      | ---              | ---    | ---      | ---    | ---                 | ---    | ---         | ---      |
|                           | 1994      | ---              | ---    | ---      | ---    | ---                 | ---    | ---         | ---      |
|                           | 1995      | ---              | ---    | ---      | ---    | ---                 | ---    | ---         | ---      |
|                           | 1996      | ---              | ---    | ---      | ---    | ---                 | ---    | ---         | ---      |
|                           | 1997      | ---              | ---    | ---      | ---    | ---                 | ---    | ---         | ---      |
|                           | 1998      | ---              | ---    | ---      | ---    | ---                 | ---    | ---         | ---      |
|                           | 1999      | ---              | ---    | ---      | ---    | ---                 | ---    | ---         | ---      |
|                           | 2000      | ---              | ---    | ---      | ---    | ---                 | ---    | ---         | ---      |
|                           | 2001      | ---              | ---    | ---      | ---    | ---                 | ---    | ---         | ---      |
|                           | 2002      | ---              | ---    | ---      | ---    | ---                 | ---    | ---         | ---      |

### Non-Citrus Fruit Utilized Production and Average Grower Return, 1993-2002 (Continued)

| Crop                  | Crop Year | Processing       |        |          |        |                     |        |             |          |
|-----------------------|-----------|------------------|--------|----------|--------|---------------------|--------|-------------|----------|
|                       |           | Juice or Crushed |        | Frozen   |        | Dried (Fresh Basis) |        | Dried Basis |          |
|                       |           | Quantity         | Value  | Quantity | Value  | Quantity            | Value  | Quantity    | Value    |
|                       |           | Tons             | \$/Ton | Tons     | \$/Ton | Tons                | \$/Ton | Tons        | \$/Ton   |
| Plums, Dried (Prunes) |           |                  |        |          |        |                     |        |             |          |
|                       | 1993      | ---              | ---    | ---      | ---    | 375,000             | 374.00 | 121,000     | 1,120.00 |
|                       | 1994      | ---              | ---    | ---      | ---    | 594,000             | 354.00 | 193,000     | 1,090.00 |
|                       | 1995      | ---              | ---    | ---      | ---    | 597,300             | 320.00 | 181,000     | 1,040.00 |
|                       | 1996      | ---              | ---    | ---      | ---    | 704,000             | 262.00 | 223,000     | 839.00   |
|                       | 1997      | ---              | ---    | ---      | ---    | 627,300             | 289.00 | 205,000     | 883.00   |
|                       | 1998      | ---              | ---    | ---      | ---    | 329,600             | 239.00 | 103,000     | 764.00   |
|                       | 1999      | ---              | ---    | ---      | ---    | 478,500             | 297.00 | 165,000     | 861.00   |
|                       | 2000      | ---              | ---    | ---      | ---    | 625,100             | 248.00 | 201,000     | 770.00   |
|                       | 2001      | ---              | ---    | ---      | ---    | 378,000             | 258.00 | 135,000     | 723.00   |
|                       | 2002      | ---              | ---    | ---      | ---    | 483,000             | 272.00 | 162,000     | 810.00   |

### Raisin Production and Average Grower Return, 1993-2002

| Raisins 1/               | Crop Year | All Varieties | Naturally Dried   |         |                        |          |               | Dehydrated, All Types |
|--------------------------|-----------|---------------|-------------------|---------|------------------------|----------|---------------|-----------------------|
|                          |           |               | Thompson Seedless | Muscats | Oleate 2/              | Sultanas | Zante Currant |                       |
| Production 3/            |           |               |                   |         | <i>Tons</i>            |          |               |                       |
|                          | 1993      | 382,000       | 338,000           | 170     | ---                    | 330      | 5,700         | 37,800                |
|                          | 1994      | 418,600       | 378,400           | 230     | 400                    | 270      | 5,400         | 33,900                |
|                          | 1995      | 306,400       | 264,800           | 150     | 300                    | 130      | 2,820         | 38,200                |
|                          | 1996      | 311,500       | 272,100           | 130     | 810                    | 140      | 4,520         | 33,800                |
|                          | 1997      | 428,500       | 382,500           | 80      | 1,100                  | 200      | 4,820         | 39,800                |
|                          | 1998      | 277,400       | 240,500           | 30      | 580                    | 120      | 3,770         | 32,400                |
|                          | 1999      | 342,300       | 300,000           | 10      | 270                    | 120      | 3,700         | 38,200                |
|                          | 2000      | 484,500       | 437,000           | 60      | 3,700                  | 140      | 4,800         | 38,800                |
|                          | 2001      | 411,300       | 378,000           | 50      | 6,500                  | 150      | 4,200         | 22,400                |
|                          | 2002      | 425,800       | ---               | ---     | ---                    | ---      | ---           | ---                   |
| Average Grower Return 3/ |           |               |                   |         | <i>Dollars Per Ton</i> |          |               |                       |
|                          | 1993      | 937           | 908               | 1,080   | ---                    | 817      | 1,260         | 1,150                 |
|                          | 1994      | 923           | 908               | 1,000   | 970                    | 773      | 1,000         | 1,080                 |
|                          | 1995      | 980           | 947               | 935     | 978                    | 733      | 871           | 1,220                 |
|                          | 1996      | 1,070         | 1,050             | 1,000   | 943                    | 823      | 1,180         | 1,250                 |
|                          | 1997      | 908           | 881               | 1,000   | 1,100                  | 842      | 658           | 1,190                 |
|                          | 1998      | 1,250         | 1,240             | 700     | 1,280                  | 818      | 994           | 1,360                 |
|                          | 1999      | 1,220         | 1,210             | 702     | 1,240                  | 919      | 596           | 1,400                 |
|                          | 2000      | 569           | 564               | 533     | 855                    | 590      | 831           | 852                   |
|                          | 2001      | 548           | 538               | 536     | 814                    | 531      | 976           | 964                   |
|                          | 2002      | 435           | ---               | ---     | ---                    | ---      | ---           | ---                   |

1/ Excludes raisins produced from table-type grapes.

2/ Miscellaneous seedless grapes with Oleate applied.

3/ Missing 2002 data will be available by the end of January 2004.

# **Nut Acreage, Production and Value, 1993-2002**

| Crop                             | Crop Year | Bearing      | Non-Bearing  | Yield Per Acre | Production          |                     |                     | Value Per Unit  | Total Value    |
|----------------------------------|-----------|--------------|--------------|----------------|---------------------|---------------------|---------------------|-----------------|----------------|
|                                  |           |              |              |                | Marketable In-Shell | Shelling Stock      | Total               |                 |                |
|                                  |           | <i>Acres</i> | <i>Acres</i> | <i>Pounds</i>  | <i>1,000 Pounds</i> | <i>1,000 Pounds</i> | <i>1,000 Pounds</i> | <i>\$/Pound</i> | <i>\$1,000</i> |
| Almonds 1/ 2/<br>(Shelled Basis) | 1993      | 413,000      | 33,400       | 1,190          | ---                 | ---                 | 490,000             | 1.94            | 930,618        |
|                                  | 1994      | 433,000      | 46,500       | 1,700          | ---                 | ---                 | 735,000             | 1.34            | 965,202        |
|                                  | 1995      | 418,000      | 65,700       | 885            | ---                 | ---                 | 370,000             | 2.48            | 880,896        |
|                                  | 1996      | 428,000      | 72,400       | 1,190          | ---                 | ---                 | 510,000             | 2.08            | 1,018,368      |
|                                  | 1997      | 442,000      | 63,000       | 1,720          | ---                 | ---                 | 759,000             | 1.56            | 1,160,640      |
|                                  | 1998      | 460,000      | 113,000      | 1,130          | ---                 | ---                 | 520,000             | 1.41            | 703,590        |
|                                  | 1999      | 480,000      | 105,000      | 1,740          | ---                 | ---                 | 833,000             | 0.86            | 687,742        |
|                                  | 2000      | 500,000      | 95,000       | 1,410          | ---                 | ---                 | 703,000             | 0.97            | 666,487        |
|                                  | 2001      | 525,000      | 70,000       | 1,580          | ---                 | ---                 | 830,000             | 0.91            | 740,012        |
|                                  | 2002      | 530,000      | 60,000       | 2,060          | ---                 | ---                 | 1,090,000           | 1.10            | 1,189,870      |
| Pecans<br>(In-Shell Basis)       | 1993      | 2,500        | 500          | 1,200          | ---                 | ---                 | 3,000               | 0.96            | 2,880          |
|                                  | 1994      | 2,600        | N/A          | 577            | ---                 | ---                 | 1,500               | 1.16            | 1,740          |
|                                  | 1995      | 2,600        | N/A          | 1,120          | ---                 | ---                 | 2,900               | 1.28            | 3,712          |
|                                  | 1996      | 2,500        | N/A          | 520            | ---                 | ---                 | 1,300               | 0.83            | 1,079          |
|                                  | 1997      | 2,600        | N/A          | 962            | ---                 | ---                 | 3,000               | 1.32            | 3,960          |
|                                  | 1998      | 2,600        | N/A          | 654            | ---                 | ---                 | 1,700               | 1.66            | 2,822          |
|                                  | 1999      | 2,600        | N/A          | 731            | ---                 | ---                 | 1,900               | 1.27            | 2,413          |
|                                  | 2000      | 2,600        | N/A          | 1,310          | ---                 | ---                 | 3,400               | 1.52            | 5,168          |
|                                  | 2001      | 2,600        | N/A          | 1,420          | ---                 | ---                 | 3,700               | 0.81            | 2,997          |
|                                  | 2002      | 2,600        | N/A          | 1,460          | ---                 | ---                 | 3,800               | 1.27            | 4,826          |
| Pistachios                       | 1993      | 57,000       | 15,700       | 2,670          | 113,000             | 39,000              | 152,000             | 1.07            | 162,640        |
|                                  | 1994      | 57,500       | 16,600       | 2,240          | 94,600              | 34,400              | 129,000             | 0.92            | 118,809        |
|                                  | 1995      | 60,300       | 13,400       | 2,450          | 107,500             | 40,500              | 148,000             | 1.09            | 161,320        |
|                                  | 1996      | 64,300       | 17,100       | 1,630          | 85,000              | 20,000              | 105,000             | 1.16            | 121,800        |
|                                  | 1997      | 65,400       | 17,000       | 2,750          | 137,000             | 43,000              | 180,000             | 1.13            | 203,400        |
|                                  | 1998      | 68,000       | 19,300       | 2,760          | 138,000             | 50,000              | 188,000             | 1.03            | 193,640        |
|                                  | 1999      | 71,000       | 21,000       | 1,730          | 105,000             | 18,000              | 123,000             | 1.33            | 163,590        |
|                                  | 2000      | 74,600       | 21,700       | 3,260          | 190,000             | 53,000              | 243,000             | 1.01            | 245,430        |
|                                  | 2001      | 78,000       | 23,500       | 2,060          | 126,500             | 34,500              | 161,000             | 1.01            | 162,610        |
|                                  | 2002      | 83,000       | N/A          | 3,650          | 242,000             | 61,000              | 303,000             | 1.11            | 336,330        |
| Walnuts 2/<br>(In-Shell Basis)   |           | <i>Acres</i> | <i>Acres</i> | <i>Tons</i>    | <i>Tons</i>         | <i>Tons</i>         | <i>Tons</i>         | <i>\$/Ton</i>   | <i>\$1,000</i> |
|                                  | 1993      | 185,000      | 20,000       | 1.41           | ---                 | ---                 | 260,000             | 1,390.00        | 361,400        |
|                                  | 1994      | 189,000      | 25,600       | 1.23           | ---                 | ---                 | 232,000             | 1,030.00        | 238,960        |
|                                  | 1995      | 193,000      | 23,300       | 1.21           | ---                 | ---                 | 234,000             | 1,400.00        | 327,600        |
|                                  | 1996      | 192,000      | 23,200       | 1.08           | ---                 | ---                 | 208,000             | 1,580.00        | 328,640        |
|                                  | 1997      | 193,000      | 20,900       | 1.39           | ---                 | ---                 | 269,000             | 1,430.00        | 384,670        |
|                                  | 1998      | 193,000      | 28,000       | 1.18           | ---                 | ---                 | 227,000             | 1,050.00        | 238,350        |
|                                  | 1999      | 191,000      | 29,000       | 1.48           | ---                 | ---                 | 283,000             | 886.00          | 250,738        |
|                                  | 2000      | 193,000      | 30,000       | 1.24           | ---                 | ---                 | 239,000             | 1,240.00        | 296,360        |
|                                  | 2001      | 196,000      | 28,000       | 1.56           | ---                 | ---                 | 305,000             | 1,120.00        | 341,600        |
|                                  | 2002      | 200,000      | 26,000       | 1.41           | ---                 | ---                 | 282,000             | 1,080.00        | 304,560        |

1/ Values are based on the edible portion of the crop only. Included in production are inedible quantities of no value as follows: 1993 -- 10.3 million pounds, 1994 -- 14.7 million pounds, 1995 -- 14.8 million pounds, 1996 -- 20.4 million pounds, 1997 -- 15.0 million pounds, 1998 -- 21.0 million pounds, 1999 -- 33.3 million pounds, 2000 -- 15.9 million pounds, 2001 -- 16.8 million pounds, 2002 -- 8.30 million pounds.

2/ Data for 2002 acreage by county, variety and year of planting available upon request.



# California Livestock and Dairy

The Golden State's dairy industry continued its phenomenal growth as new record highs were set for the number of milk cows and milk production. In 2002, California led the nation in total milk production with a record 34.9 billion pounds, representing a 5 percent increase from the previous year. The average number of cows in 2002 was 1.65 million, up 4 percent from 2001. Total milk value was \$3.82 billion, down 18 percent. This decrease is due to a 22 percent decline in the unit value, which went from \$13.94 to \$10.94 per hundredweight.

The five leading counties in milk production and number of milk cows were Tulare, Merced, Stanislaus, San Bernardino and Kings. Collectively, these counties accounted for approximately two-thirds of the state's milk production and milk cows.

Nationally, California ranked first in nonfat dry milk production, first in butter production, and second in cheese production. California produced 48 percent of the nation's nonfat dry milk, 28 percent of the butter, and 20 percent of the cheese. Cheddar and mozzarella cheeses constituted approximately three-fourths of the cheese production in California.

Livestock cash receipts (excluding broilers) during 2002 totaled \$6.24 billion, down 15 percent from 2001. The decrease was due mainly to an 18 percent decline in milk and cream, as well as a 9 percent fall in the value of cattle and calves.

Total production of the three red meat species (cattle, sheep and hogs) was 1.99 billion pounds, down 5 percent from the 2.10 billion pounds of a year ago. Total marketings of the three red meat species also declined by 4 percent, from 2.58 to 2.47 billion pounds. Cattle and calf marketings were 2.33 billion pounds, representing a 4 percent reduction. Sheep and lamb marketings of 77.8 million pounds were down 5 percent from 2001. Hog and pig marketings of 64.0 million pounds were up 8 percent from 2001.

Cattle and calves marketed from California feedlots totaled 671,000, which is an 11 percent increase over 2001. Turkey production decreased 3 percent to 439 million pounds in 2002. Egg production of 6.12 billion eggs was up 2 percent. Honey production was 23.3 million pounds, down 16 percent from 2001. Wool production was 3.65 million pounds, down 3 percent from the previous year.

### Bee Colonies, Honey Production and Value, 1993-2002

| Year | Bee Colonies | Yield Per Colony | Production          | Average Price Per Pound | Total Value    |
|------|--------------|------------------|---------------------|-------------------------|----------------|
|      | <i>1,000</i> | <i>Pounds</i>    | <i>1,000 Pounds</i> | <i>Cents</i>            | <i>\$1,000</i> |
| 1993 | 500          | 90               | 45,000              | 50                      | 22,500         |
| 1994 | 400          | 60               | 24,000              | 51                      | 12,240         |
| 1995 | 420          | 93               | 39,060              | 63                      | 24,608         |
| 1996 | 390          | 70               | 27,300              | 84                      | 22,932         |
| 1997 | 420          | 75               | 31,500              | 70                      | 22,050         |
| 1998 | 450          | 83               | 37,350              | 62                      | 23,157         |
| 1999 | 505          | 60               | 30,300              | 55                      | 16,665         |
| 2000 | 440          | 70               | 30,800              | 59                      | 18,172         |
| 2001 | 425          | 65               | 27,625              | 69                      | 19,061         |
| 2002 | 440          | 53               | 23,320              | 129                     | 30,083         |

### Beef Cow Operations and Inventory, 1993-2002

| Year | 1 - 99 Head             |           | 100-499 Head 1/ |           | 500+ Head  |           |
|------|-------------------------|-----------|-----------------|-----------|------------|-----------|
|      | Operations              | Inventory | Operations      | Inventory | Operations | Inventory |
|      | <i>Percent of Total</i> |           |                 |           |            |           |
| 1993 | 86.0                    | 24.0      | 12.0            | 43.0      | 2.0        | 33.0      |
| 1994 | 86.0                    | 24.0      | 12.0            | 44.0      | 2.0        | 32.0      |
| 1995 | 86.3                    | 24.0      | 11.9            | 44.0      | 1.9        | 32.0      |
| 1996 | 86.0                    | 24.0      | 12.0            | 43.0      | 2.0        | 33.0      |
| 1997 | 85.8                    | 24.0      | 12.2            | 42.0      | 2.0        | 34.0      |
| 1998 | 85.5                    | 23.0      | 12.4            | 43.0      | 2.1        | 34.0      |
| 1999 | 85.3                    | 22.0      | 12.6            | 43.0      | 2.1        | 35.0      |
| 2000 | 85.2                    | 21.0      | 12.7            | 44.0      | 2.1        | 35.0      |
| 2001 | 85.1                    | 21.0      | 12.6            | 45.0      | 2.3        | 34.0      |
| 2002 | 84.1                    | 19.0      | 13.6            | 45.0      | 2.3        | 36.0      |

1/ Starting in 1993, the 100+ Head class was broken out into 100-499 Head and 500+ Head classes.

### Cattle Operations and Inventory, 1993-2002

| Year | 1 - 99 Head             |           | 100 - 499 Head |           | 500-999 Head 1/ |           | 1,000+ Head |           |
|------|-------------------------|-----------|----------------|-----------|-----------------|-----------|-------------|-----------|
|      | Operation               | Inventory | Operation      | Inventory | Operation       | Inventory | Operation   | Inventory |
|      | <i>Percent of Total</i> |           |                |           |                 |           |             |           |
| 1993 | 76.8                    | 6.5       | 14.0           | 18.5      | 4.8             | 19.0      | 4.4         | 56.0      |
| 1994 | 75.8                    | 6.0       | 14.6           | 18.0      | 5.0             | 19.0      | 4.6         | 57.0      |
| 1995 | 75.6                    | 6.0       | 14.8           | 18.0      | 5.2             | 20.0      | 4.4         | 56.0      |
| 1996 | 75.0                    | 6.0       | 15.4           | 19.0      | 5.0             | 19.0      | 4.6         | 56.0      |
| 1997 | 75.8                    | 6.5       | 14.6           | 17.5      | 4.6             | 16.0      | 5.0         | 60.0      |
| 1998 | 75.2                    | 6.0       | 14.8           | 16.0      | 4.8             | 17.0      | 5.2         | 61.0      |
| 1999 | 75.2                    | 6.0       | 14.8           | 16.0      | 4.8             | 17.0      | 5.2         | 61.0      |
| 2000 | 75.0                    | 6.0       | 14.5           | 15.0      | 5.0             | 16.0      | 5.5         | 63.0      |
| 2001 | 74.3                    | 6.0       | 14.8           | 15.0      | 5.2             | 15.0      | 5.7         | 64.0      |
| 2002 | 73.5                    | 5.5       | 15.0           | 14.5      | 5.5             | 15.0      | 6.0         | 65.0      |

1/ Starting in 1993, the 500+ Head class was broken out into 500-999 Head and 1,000+ Head classes.

**Cattle and Calves Average Prices Received, 1993-2002**

| Year                              | Jan.  | Feb.  | Mar.  | Apr.  | May   | June  | July  | Aug.  | Sept. | Oct.  | Nov.  | Dec.  | Annual Average |
|-----------------------------------|-------|-------|-------|-------|-------|-------|-------|-------|-------|-------|-------|-------|----------------|
| <i>Dollars Per Cwt.</i>           |       |       |       |       |       |       |       |       |       |       |       |       |                |
| <b>All Beef Cattle 1/</b>         |       |       |       |       |       |       |       |       |       |       |       |       |                |
| 1993                              | 66.50 | 66.10 | 65.50 | 66.00 | 66.00 | 67.70 | 65.80 | 65.10 | 63.60 | 61.60 | 61.80 | 62.10 | 64.80          |
| 1994                              | 64.00 | 65.90 | 64.50 | 59.40 | 58.80 | 56.80 | 55.30 | 56.00 | 52.20 | 50.50 | 51.30 | 51.40 | 57.40          |
| 1995                              | 54.10 | 55.00 | 52.00 | 48.40 | 47.90 | 48.40 | 45.80 | 46.30 | 43.50 | 42.20 | 41.00 | 42.20 | 47.00          |
| 1996                              | 42.20 | 41.20 | 40.90 | 38.20 | 38.20 | 41.80 | 43.60 | 45.10 | 44.50 | 43.80 | 43.60 | 44.10 | 42.40          |
| 1997                              | 43.30 | 46.30 | 48.90 | 49.00 | 51.90 | 50.30 | 49.50 | 51.30 | 49.10 | 48.90 | 49.30 | 47.70 | 48.80          |
| 1998                              | 48.40 | 48.50 | 49.80 | 50.30 | 51.20 | 49.90 | 47.00 | 47.20 | 45.80 | 46.00 | 46.00 | 44.50 | 47.80          |
| 1999                              | 45.80 | 47.20 | 48.60 | 48.50 | 48.80 | 49.70 | 49.20 | 49.70 | 48.60 | 48.30 | 48.40 | 48.50 | 49.00          |
| 2000                              | 48.10 | 48.90 | 49.50 | 52.50 | 52.00 | 51.80 | 51.10 | 50.80 | 48.10 | 48.10 | 49.40 | 50.80 | 50.00          |
| 2001                              | 54.10 | 55.90 | 58.10 | 58.20 | 56.90 | 57.10 | 55.50 | 55.20 | 51.20 | 49.80 | 47.90 | 47.40 | 53.90          |
| 2002                              | 48.20 | 51.90 | 55.50 | 52.70 | 51.70 | 51.50 | 50.50 | 49.40 | 49.50 | 47.80 | 49.10 | 52.10 | 50.80          |
| <b>Beef Steers and Heifers 2/</b> |       |       |       |       |       |       |       |       |       |       |       |       |                |
| 1993                              | 81.00 | 79.00 | 79.20 | 78.70 | 79.40 | 83.00 | 81.00 | 79.50 | 79.00 | 78.50 | 76.50 | 78.50 | 79.40          |
| 1994                              | 80.00 | 79.80 | 78.30 | 71.50 | 69.70 | 68.00 | 66.70 | 66.20 | 62.60 | 61.50 | 63.20 | 64.30 | 69.20          |
| 1995                              | 68.80 | 66.20 | 62.30 | 57.90 | 57.20 | 57.30 | 55.00 | 54.60 | 51.80 | 51.00 | 51.50 | 53.00 | 57.00          |
| 1996                              | 52.00 | 49.50 | 49.50 | 46.00 | 44.50 | 51.00 | 53.00 | 55.00 | 56.00 | 56.00 | 57.00 | 58.00 | 52.50          |
| 1997                              | 58.50 | 61.00 | 63.00 | 62.00 | 64.00 | 62.50 | 61.50 | 64.00 | 64.00 | 64.50 | 66.00 | 64.50 | 63.10          |
| 1998                              | 65.00 | 63.50 | 64.00 | 64.00 | 64.00 | 62.00 | 60.00 | 59.00 | 58.00 | 60.00 | 61.00 | 60.00 | 61.50          |
| 1999                              | 61.50 | 62.50 | 64.00 | 63.00 | 62.50 | 64.50 | 63.00 | 64.00 | 64.50 | 67.00 | 68.00 | 67.00 | 64.30          |
| 2000                              | 67.00 | 67.50 | 69.00 | 72.00 | 71.00 | 70.00 | 68.50 | 67.00 | 67.00 | 70.00 | 73.00 | 76.00 | 69.80          |
| 2001                              | 78.00 | 78.00 | 79.50 | 79.50 | 77.00 | 76.00 | 73.00 | 72.00 | 71.00 | 69.00 | 66.50 | 66.00 | 74.10          |
| 2002                              | 69.00 | 72.00 | 73.00 | 68.00 | 67.00 | 65.50 | 65.00 | 65.00 | 67.00 | 66.50 | 71.00 | 74.50 | 68.40          |
| <b>Beef Cows 3/</b>               |       |       |       |       |       |       |       |       |       |       |       |       |                |
| 1993                              | 46.20 | 46.90 | 46.50 | 46.70 | 46.00 | 46.50 | 46.40 | 45.20 | 44.30 | 43.30 | 43.50 | 42.50 | 45.40          |
| 1994                              | 43.70 | 46.00 | 45.40 | 44.60 | 43.10 | 40.00 | 40.30 | 41.30 | 38.50 | 36.40 | 34.80 | 35.00 | 41.10          |
| 1995                              | 35.50 | 38.80 | 37.80 | 35.80 | 33.90 | 35.50 | 33.70 | 34.40 | 32.40 | 31.00 | 27.00 | 29.00 | 33.50          |
| 1996                              | 31.50 | 31.50 | 30.00 | 29.00 | 29.50 | 29.50 | 32.00 | 33.00 | 31.00 | 30.00 | 29.00 | 29.00 | 30.40          |
| 1997                              | 28.00 | 31.00 | 33.00 | 35.00 | 36.50 | 34.00 | 36.00 | 37.00 | 33.00 | 32.00 | 32.00 | 31.50 | 33.10          |
| 1998                              | 32.50 | 33.50 | 34.50 | 35.50 | 35.50 | 34.50 | 33.00 | 34.50 | 33.50 | 30.00 | 29.50 | 30.30 | 32.90          |
| 1999                              | 33.50 | 34.60 | 35.40 | 35.70 | 36.20 | 35.50 | 36.50 | 36.00 | 34.50 | 33.00 | 33.00 | 34.00 | 34.80          |
| 2000                              | 35.50 | 36.50 | 36.50 | 36.50 | 37.00 | 37.50 | 37.50 | 37.50 | 35.00 | 33.50 | 35.00 | 34.00 | 35.90          |
| 2001                              | 37.50 | 40.50 | 42.00 | 41.50 | 40.50 | 41.00 | 40.00 | 42.00 | 38.50 | 37.00 | 35.50 | 35.00 | 38.90          |
| 2002                              | 36.00 | 39.00 | 40.50 | 38.00 | 37.00 | 37.00 | 36.50 | 35.00 | 34.00 | 32.50 | 32.50 | 34.50 | 35.90          |
| <b>Calves 4/</b>                  |       |       |       |       |       |       |       |       |       |       |       |       |                |
| 1993                              | 93.60 | 92.70 | 98.30 | 97.30 | 95.50 | 95.80 | 92.70 | 91.50 | 91.00 | 93.00 | 94.00 | 93.00 | 94.30          |
| 1994                              | 94.70 | 95.50 | 97.10 | 89.10 | 86.90 | 80.00 | 79.00 | 80.00 | 75.80 | 73.90 | 76.20 | 78.70 | 85.60          |
| 1995                              | 81.50 | 82.20 | 78.50 | 72.20 | 71.50 | 71.00 | 66.90 | 64.30 | 62.60 | 62.50 | 61.00 | 63.00 | 69.40          |
| 1996                              | 62.50 | 59.00 | 61.00 | 54.00 | 51.00 | 51.00 | 53.00 | 56.00 | 55.00 | 54.00 | 55.00 | 56.00 | 55.70          |
| 1997                              | 59.00 | 65.00 | 68.00 | 67.00 | 71.00 | 69.00 | 71.00 | 71.00 | 71.00 | 70.00 | 67.00 | 69.00 | 68.10          |
| 1998                              | 72.00 | 74.00 | 73.00 | 75.00 | 73.50 | 70.00 | 68.00 | 68.00 | 63.50 | 70.00 | 72.50 | 73.30 | 70.90          |
| 1999                              | 77.50 | 81.00 | 79.00 | 76.00 | 74.00 | 75.50 | 76.00 | 76.50 | 81.50 | 80.00 | 83.50 | 87.50 | 79.10          |
| 2000                              | 91.00 | 96.00 | 97.50 | 94.50 | 92.00 | 90.50 | 93.00 | 90.50 | 91.50 | 93.00 | 95.00 | 93.00 | 93.00          |
| 2001                              | 98.00 | 95.50 | 98.00 | 99.50 | 95.00 | 91.00 | 94.00 | 94.00 | 90.00 | 89.00 | 90.00 | 94.00 | 94.10          |
| 2002                              | 91.00 | 93.50 | 93.50 | 85.00 | 84.50 | 80.00 | 77.50 | 79.00 | 79.00 | 79.50 | 88.00 | 95.00 | 85.40          |

1/ Steers and heifers over 500 pounds (including fed cattle) and slaughter cows.

2/ Steers and heifers (all qualities) over 500 pounds (including fed cattle).

3/ Beef cows and cull dairy cows sold for slaughter.

4/ Steers and heifers (all qualities) under 500 pounds

### Cattle and Calves Slaughtered Under Federal and State Inspections, 1993-2002

| Year              | Jan. | Feb. | Mar. | Apr. | May | June | July | Aug. | Sept. | Oct. | Nov. | Dec. | Annual<br>Total 1/ |
|-------------------|------|------|------|------|-----|------|------|------|-------|------|------|------|--------------------|
| <i>1,000 Head</i> |      |      |      |      |     |      |      |      |       |      |      |      |                    |
| <b>Cattle</b>     |      |      |      |      |     |      |      |      |       |      |      |      |                    |
| 1993              | 73   | 67   | 72   | 72   | 70  | 75   | 74   | 72   | 70    | 71   | 71   | 71   | 857                |
| 1994              | 70   | 62   | 73   | 69   | 74  | 80   | 74   | 80   | 75    | 79   | 83   | 82   | 901                |
| 1995              | 82   | 72   | 82   | 72   | 79  | 89   | 80   | 89   | 82    | 89   | 88   | 81   | 985                |
| 1996              | 88   | 77   | 78   | 81   | 87  | 84   | 85   | 87   | 81    | 94   | 87   | 88   | 1,017              |
| 1997              | 95   | 75   | 82   | 86   | 84  | 83   | 88   | 84   | 84    | 93   | 81   | 95   | 1,030              |
| 1998              | 90   | 79   | 83   | 84   | 80  | 86   | 86   | 87   | 88    | 88   | 83   | 87   | 1,019              |
| 1999              | 81   | 74   | 86   | 82   | 79  | 86   | 81   | 85   | 83    | 86   | 86   | 87   | 997                |
| 2000              | 83   | 81   | 92   | 75   | 86  | 89   | 81   | 92   | 87    | 94   | 93   | 86   | 1,038              |
| 2001              | 92   | 77   | 89   | 82   | 89  | 91   | 89   | 96   | 85    | 99   | 90   | 83   | 1,062              |
| 2002              | 102  | 90   | 97   | 107  | 111 | 108  | 114  | 116  | 110   | 120  | 109  | 111  | 1,294              |
| <b>Calves</b>     |      |      |      |      |     |      |      |      |       |      |      |      |                    |
| 1993              | 8    | 7    | 7    | 6    | 5   | 5    | 6    | 6    | 5     | 5    | 5    | 6    | 70                 |
| 1994              | 6    | 5    | 6    | 6    | 7   | 8    | 9    | 9    | 8     | 13   | 15   | 14   | 106                |
| 1995              | 16   | 12   | 14   | 14   | 21  | 21   | 19   | 19   | 16    | 13   | 15   | 18   | 196                |
| 1996              | 21   | 24   | 24   | 23   | 25  | 24   | 27   | 25   | 21    | 20   | 17   | 18   | 269                |
| 1997              | 22   | 17   | 16   | 15   | 12  | 15   | 17   | 17   | 17    | 15   | 15   | 20   | 200                |
| 1998              | 19   | 17   | 16   | 14   | 12  | 15   | 22   | 19   | 16    | 14   | 13   | 16   | 191                |
| 1999              | 15   | 14   | 16   | 11   | 10  | 13   | 16   | 17   | 16    | 13   | 11   | 12   | 164                |
| 2000              | 12   | 11   | 12   | 8    | 10  | 11   | 10   | 11   | 10    | 10   | 9    | 8    | 121                |
| 2001              | 9    | 8    | 8    | 8    | 8   | 8    | 9    | 10   | 9     | 10   | 10   | 9    | 105                |
| 2002              | 10   | 9    | 9    | 10   | 10  | 9    | 12   | 11   | 10    | 10   | 10   | 12   | 121                |

1/ Totals may not equal sum of parts due to rounding.

### Average Live Weights of Cattle and Calves Slaughtered Under Federal and State Inspections, 1993-2002

| Year          | Jan.  | Feb.  | Mar.  | Apr.  | May   | June  | July  | Aug.  | Sept. | Oct.  | Nov.  | Dec.  | Annual<br>Average |
|---------------|-------|-------|-------|-------|-------|-------|-------|-------|-------|-------|-------|-------|-------------------|
| <i>Pounds</i> |       |       |       |       |       |       |       |       |       |       |       |       |                   |
| <b>Cattle</b> |       |       |       |       |       |       |       |       |       |       |       |       |                   |
| 1993          | 1,222 | 1,206 | 1,211 | 1,210 | 1,223 | 1,210 | 1,213 | 1,219 | 1,238 | 1,253 | 1,247 | 1,245 | 1,225             |
| 1994          | 1,264 | 1,261 | 1,232 | 1,245 | 1,235 | 1,213 | 1,215 | 1,213 | 1,206 | 1,224 | 1,223 | 1,236 | 1,230             |
| 1995          | 1,231 | 1,222 | 1,207 | 1,228 | 1,240 | 1,237 | 1,226 | 1,223 | 1,232 | 1,243 | 1,233 | 1,229 | 1,229             |
| 1996          | 1,244 | 1,240 | 1,233 | 1,224 | 1,225 | 1,224 | 1,229 | 1,200 | 1,219 | 1,219 | 1,222 | 1,224 | 1,225             |
| 1997          | 1,224 | 1,203 | 1,244 | 1,238 | 1,240 | 1,235 | 1,245 | 1,244 | 1,253 | 1,263 | 1,264 | 1,243 | 1,242             |
| 1998          | 1,245 | 1,243 | 1,217 | 1,224 | 1,240 | 1,248 | 1,237 | 1,237 | 1,245 | 1,250 | 1,275 | 1,267 | 1,244             |
| 1999          | 1,292 | 1,271 | 1,275 | 1,259 | 1,246 | 1,241 | 1,231 | 1,248 | 1,250 | 1,251 | 1,261 | 1,251 | 1,256             |
| 2000          | 1,257 | 1,237 | 1,230 | 1,238 | 1,244 | 1,240 | 1,233 | 1,233 | 1,247 | 1,244 | 1,231 | 1,264 | 1,241             |
| 2001          | 1,269 | 1,259 | 1,249 | 1,269 | 1,266 | 1,238 | 1,257 | 1,262 | 1,270 | 1,279 | 1,313 | 1,303 | 1,269             |
| 2002          | 1,305 | 1,295 | 1,308 | 1,290 | 1,312 | 1,294 | 1,273 | 1,269 | 1,280 | 1,288 | 1,275 | 1,286 | 1,289             |
| <b>Calves</b> |       |       |       |       |       |       |       |       |       |       |       |       |                   |
| 1993          | 314   | 334   | 345   | 345   | 342   | 351   | 369   | 351   | 335   | 362   | 377   | 360   | 349               |
| 1994          | 366   | 373   | 370   | 368   | 377   | 360   | 352   | 344   | 367   | 347   | 314   | 352   | 352               |
| 1995          | 400   | 320   | 377   | 332   | 296   | 290   | 322   | 326   | 338   | 338   | 370   | 364   | 337               |
| 1996          | 363   | 348   | 359   | 367   | 357   | 362   | 357   | 350   | 321   | 330   | 328   | 321   | 348               |
| 1997          | 324   | 334   | 351   | 349   | 352   | 374   | 356   | 350   | 346   | 352   | 336   | 256   | 338               |
| 1998          | 248   | 240   | 148   | 113   | 115   | 119   | 115   | 119   | 121   | 122   | 131   | 128   | 146               |
| 1999          | 123   | 126   | 135   | 149   | 149   | 162   | 134   | 130   | 136   | 146   | 163   | 155   | 141               |
| 2000          | 166   | 154   | 153   | 160   | 192   | 179   | 164   | 149   | 152   | 156   | 160   | 153   | 162               |
| 2001          | 153   | 157   | 157   | 157   | 149   | 156   | 160   | 159   | 157   | 185   | 173   | 180   | 162               |
| 2002          | 166   | 171   | 163   | 152   | 143   | 133   | 130   | 123   | 138   | 152   | 141   | 140   | 145               |

**Cattle and Calves Marketed from Feedlots, 1993-2002**

| Year | January-March     | April-June | July-September | October-December | Annual Total |
|------|-------------------|------------|----------------|------------------|--------------|
|      | <i>1,000 Head</i> |            |                |                  |              |
| 1993 | 165               | 150        | 135            | 135              | 585          |
| 1994 | 130               | 150        | 145            | 155              | 580          |
| 1995 | 150               | 160        | 150            | 135              | 595          |
| 1996 | 145               | 140        | 135            | 145              | 565          |
| 1997 | 135               | 150        | 140            | 145              | 570          |
| 1998 | 140               | 125        | 145            | 160              | 570          |
| 1999 | 145               | 150        | 153            | 142              | 590          |
| 2000 | 153               | 154        | 151            | 150              | 608          |
| 2001 | 161               | 151        | 149            | 145              | 606          |
| 2002 | 162               | 186        | 160            | 163              | 671          |

**Cattle by Class as of January 1, 1994-2003**

| Year | Cows That Have Calved |       |       | Heifers 500+ Lbs. |      |               | Other Cattle          |                 |                  | All Cattle and Calves |
|------|-----------------------|-------|-------|-------------------|------|---------------|-----------------------|-----------------|------------------|-----------------------|
|      | Beef                  | Dairy | All   | Cow Replacements  |      | Other Heifers | Calves Under 500 Lbs. | Bulls 500+ Lbs. | Steers 500+ Lbs. |                       |
|      |                       |       |       | Beef              | Milk |               |                       |                 |                  |                       |
|      | 1,000 Head            |       |       |                   |      |               |                       |                 |                  |                       |
| 1994 | 860                   | 1,230 | 2,090 | 155               | 610  | 170           | 980                   | 75              | 670              | 4,750                 |
| 1995 | 850                   | 1,270 | 2,120 | 155               | 630  | 170           | 970                   | 75              | 680              | 4,800                 |
| 1996 | 840                   | 1,320 | 2,160 | 150               | 650  | 180           | 980                   | 70              | 660              | 4,850                 |
| 1997 | 820                   | 1,380 | 2,200 | 150               | 660  | 170           | 980                   | 70              | 670              | 4,900                 |
| 1998 | 820                   | 1,400 | 2,220 | 145               | 670  | 165           | 990                   | 65              | 645              | 4,900                 |
| 1999 | 810                   | 1,440 | 2,250 | 145               | 720  | 190           | 1,060                 | 70              | 665              | 5,100                 |
| 2000 | 790                   | 1,490 | 2,280 | 145               | 720  | 175           | 1,050                 | 70              | 660              | 5,100                 |
| 2001 | 780                   | 1,560 | 2,340 | 140               | 750  | 170           | 1,050                 | 70              | 630              | 5,150                 |
| 2002 | 760                   | 1,620 | 2,380 | 135               | 770  | 170           | 1,040                 | 65              | 640              | 5,200                 |
| 2003 | 740                   | 1,680 | 2,420 | 130               | 790  | 170           | 1,060                 | 65              | 615              | 5,250                 |

**Cattle Inventory, Supply and Disposition, 1993-2002**

| Year | Beginning<br>Inventory<br>January 1 | Calf Crop | Inshipments | Marketings 1/ |        | Farm<br>Slaughter<br>Cattle and<br>Calves 2/ | Deaths |        | Ending<br>Inventory<br>January 1 |
|------|-------------------------------------|-----------|-------------|---------------|--------|----------------------------------------------|--------|--------|----------------------------------|
|      |                                     |           |             | Cattle        | Calves |                                              | Cattle | Calves |                                  |
|      | 1,000 Head                          |           |             |               |        |                                              |        |        |                                  |
| 1993 | 4,600                               | 1,750     | 700         | 1,889         | 162    | 19                                           | 75     | 155    | 4,750                            |
| 1994 | 4,750                               | 1,800     | 700         | 2,040         | 172    | 19                                           | 80     | 139    | 4,800                            |
| 1995 | 4,800                               | 1,820     | 800         | 2,106         | 212    | 20                                           | 95     | 137    | 4,850                            |
| 1996 | 4,850                               | 1,860     | 820         | 2,064         | 312    | 20                                           | 90     | 144    | 4,900                            |
| 1997 | 4,900                               | 1,880     | 785         | 2,167         | 261    | 22                                           | 90     | 125    | 4,900                            |
| 1998 | 4,900                               | 1,920     | 600         | 1,855         | 201    | 19                                           | 95     | 150    | 5,100                            |
| 1999 | 5,100                               | 1,950     | 700         | 2,119         | 282    | 19                                           | 85     | 145    | 5,100                            |
| 2000 | 5,100                               | 1,980     | 700         | 2,013         | 362    | 15                                           | 90     | 150    | 5,150                            |
| 2001 | 5,150                               | 1,990     | 750         | 2,054         | 387    | 14                                           | 90     | 145    | 5,200                            |
| 2002 | 5,200                               | 2,040     | 700         | 1,934         | 502    | 14                                           | 90     | 150    | 5,250                            |

1/ Includes custom slaughter for use on farms where produced, but excludes inter-farm sales.

2/ Excludes custom slaughter for farmers at commercial establishments.

**Manufactured Dairy Products, 1998-2002**

| Commodity                                | 1998          | 1999      | 2000      | 2001      | 2002 1/   |
|------------------------------------------|---------------|-----------|-----------|-----------|-----------|
|                                          | 1,000 Pounds  |           |           |           |           |
| Butter                                   | 312,749       | 343,389   | 360,013   | 341,103   | 379,462   |
| All Cheese Total 2/                      | 1,243,062     | 1,387,582 | 1,496,653 | 1,643,334 | 1,722,190 |
| American Cheese Total                    | 505,935       | 597,048   | 641,662   | 745,391   | 814,170   |
| Cheddar                                  | 368,327       | 427,517   | 461,691   | 539,221   | 590,194   |
| Monterey, Jack and Other                 | 137,608       | 169,531   | 179,971   | 206,170   | 223,976   |
| Italian Cheese Total                     | 656,163       | 698,563   | 725,572   | 772,827   | 791,186   |
| Mozzarella                               | 555,126       | 619,470   | 634,006   | 675,623   | 697,751   |
| Other Italian                            | 101,037       | 79,093    | 91,566    | 97,204    | 93,435    |
| Hispanic Cheese                          | 50,313        | 58,388    | 65,252    | 70,636    | 78,669    |
| All Other Cheese                         | 8,977         | 11,314    | 37,781    | 24,423    | 12,775    |
| Creamed and Low Fat Cottage Cheese Total | 98,938        | 101,647   | 100,769   | 98,410    | 96,416    |
| Creamed                                  | 33,247        | 34,065    | 33,496    | 31,690    | 31,086    |
| Low Fat 3/                               | 65,691        | 67,582    | 67,273    | 66,720    | 65,330    |
| Curd Cottage Cheese Total                | 54,206        | 53,520    | 48,684    | 40,258    | 41,759    |
| Yogurt, Plain and Flavored               | 200,363       | 238,110   | 257,211   | 264,304   | 266,804   |
| Milk, Nonfat Dry for Human Consumption   | 507,135       | 652,040   | 692,954   | 694,459   | 758,985   |
| Milk, Unsweetened Condensed Skim         | 547,715       | 648,213   | 522,391   | 468,728   | 504,448   |
|                                          | 1,000 Gallons |           |           |           |           |
| Ice Cream 4/                             | 116,192       | 139,692   | 137,534   | 143,525   | 131,526   |
| Low Fat Ice Cream Total 5/               | 42,979        | 35,684    | 31,355    | 26,859    | 31,645    |
| Hard                                     | 10,297        | 6,603     | 8,038     | 4,965     | 6,922     |
| Soft                                     | 32,682        | 29,081    | 23,317    | 21,894    | 24,723    |
| Milk Sherbet                             | 7,264         | 8,323     | 7,299     | 7,000     | 7,943     |
| Water Ices                               | 4,392         | 3,993     | 5,011     | 3,001     | 3,557     |

1/ Preliminary 2002 data.

2/ Excludes processed cheese, Hispanic cheese, cottage cheese and other cheeses not broken out separately.

3/ Includes low fat and nonfat cottage cheese.

4/ Includes nonfat ice cream.

5/ Previously referred to as Ice Milk.

**Milk Cow Average Prices Received, 1993-2002 1/**

| Year | Jan.             | Apr.  | July  | Oct.  | Annual Average |
|------|------------------|-------|-------|-------|----------------|
|      | Dollars Per Head |       |       |       |                |
| 1993 | 1,270            | 1,320 | 1,320 | 1,330 | 1,310          |
| 1994 | 1,340            | 1,320 | 1,230 | 1,290 | 1,300          |
| 1995 | 1,270            | 1,230 | 1,230 | 1,190 | 1,230          |
| 1996 | 1,190            | 1,190 | 1,230 | 1,280 | 1,220          |
| 1997 | 1,230            | 1,250 | 1,240 | 1,240 | 1,240          |
| 1998 | 1,220            | 1,260 | 1,290 | 1,310 | 1,270          |
| 1999 | 1,340            | 1,340 | 1,360 | 1,470 | 1,380          |
| 2000 | 1,480            | 1,500 | 1,500 | 1,480 | 1,490          |
| 2001 | 1,480            | 1,480 | 1,650 | 1,850 | 1,620          |
| 2002 | 1,800            | 1,900 | 1,800 | 1,450 | 1,740          |

1/ For dairy herd replacement.

### Milk Cows Calved, Milk Production and Value, 1993-2002

| Year | Milk Cows and Heifers Calved |                   | Production Per Milk Cow |               | Production on Farms   |                       | Value<br>Per Cwt. | Total<br>Value 1/ |
|------|------------------------------|-------------------|-------------------------|---------------|-----------------------|-----------------------|-------------------|-------------------|
|      | January 1                    | Annual Average    | Milk                    | Milk Fat      | Milk                  | Milk Fat              |                   |                   |
|      | <i>1,000 Head</i>            | <i>1,000 Head</i> | <i>Pounds</i>           | <i>Pounds</i> | <i>Million Pounds</i> | <i>Million Pounds</i> |                   |                   |
| 1993 | 1,200                        | 1,216             | 18,852                  | 690           | 22,924                | 839                   | 11.63             | 2,663,516         |
| 1994 | 1,230                        | 1,249             | 20,203                  | 737           | 25,234                | 921                   | 11.97             | 3,016,105         |
| 1995 | 1,270                        | 1,294             | 19,573                  | 712           | 25,327                | 922                   | 12.18             | 3,080,084         |
| 1996 | 1,320                        | 1,349             | 19,161                  | 701           | 25,848                | 946                   | 14.39             | 3,714,624         |
| 1997 | 1,380                        | 1,391             | 19,829                  | 722           | 27,582                | 1,004                 | 13.17             | 3,629,762         |
| 1998 | 1,400                        | 1,420             | 19,475                  | 715           | 27,654                | 1,015                 | 15.01             | 4,140,659         |
| 1999 | 1,440                        | 1,466             | 20,777                  | 760           | 30,459                | 1,115                 | 13.45             | 4,090,952         |
| 2000 | 1,490                        | 1,526             | 21,149                  | 778           | 32,273                | 1,188                 | 11.50             | 3,707,255         |
| 2001 | 1,563                        | 1,589             | 20,904                  | 771           | 33,217                | 1,226                 | 13.94             | 4,630,450         |
| 2002 | 1,624                        | 1,647             | 21,180                  | 782           | 34,884                | 1,287                 | 10.94             | 3,816,310         |

1/ Milk valued at averaged returns per 100 pounds in combined marketings of milk and cream. Includes value of milk fed to calves.

### Milk Cow Operations and Inventory, 1993-2002

| Year | 1 - 49 Head             |           | 50 - 99 Head |           | 100-199 Head 1/ |           | 200+ Head 2/ |           | 200-499 Head |           | 500+ Head |           |
|------|-------------------------|-----------|--------------|-----------|-----------------|-----------|--------------|-----------|--------------|-----------|-----------|-----------|
|      | Operation               | Inventory | Operation    | Inventory | Operation       | Inventory | Operation    | Inventory | Operation    | Inventory | Operation | Inventory |
|      | <i>Percent of Total</i> |           |              |           |                 |           |              |           |              |           |           |           |
| 1993 | 43.0                    | 0.6       | 4.5          | 1.1       | 7.5             | 3.3       | 45.0         | 95.0      | ---          | ---       | ---       | ---       |
| 1994 | 36.7                    | 0.6       | 4.4          | 1.0       | 8.9             | 3.4       | 50.0         | 95.0      | ---          | ---       | ---       | ---       |
| 1995 | 31.5                    | 0.4       | 4.5          | 0.9       | 9.4             | 3.7       | 54.6         | 95.0      | ---          | ---       | ---       | ---       |
| 1996 | 23.1                    | 0.4       | 4.5          | 0.8       | 10.3            | 3.8       | 62.1         | 95.0      | ---          | ---       | ---       | ---       |
| 1997 | 21.1                    | 0.4       | 4.3          | 0.7       | 10.3            | 3.4       | 64.0         | 95.5      | 26.8         | 16.5      | 37.5      | 79.0      |
| 1998 | 18.9                    | 0.4       | 4.1          | 0.7       | 10.0            | 3.4       | 67.0         | 95.5      | 27.8         | 17.5      | 39.3      | 78.0      |
| 1999 | 17.3                    | 0.3       | 2.7          | 0.4       | 9.6             | 3.3       | 70.4         | 96.0      | 28.1         | 17.0      | 42.3      | 79.0      |
| 2000 | 14.8                    | 0.3       | 2.8          | 0.3       | 9.2             | 2.9       | 73.2         | 96.5      | 29.2         | 16.5      | 44.0      | 80.0      |
| 2001 | 14.8                    | 0.3       | 3.2          | 0.3       | 10.0            | 2.4       | 72.0         | 97.0      | 28.0         | 15.0      | 44.0      | 82.0      |
| 2002 | 14.0                    | 0.3       | 3.6          | 0.4       | 10.4            | 2.3       | 72.0         | 97.0      | 28.0         | 14.0      | 44.0      | 83.0      |

1/ Starting in 1993, the 100+ Head class was broken out into 100-199 Head and 200+ Head classes.

2/ Starting in 1997, the 200+ Head class was broken out into 200+ Head, 200-499 Head, and 500+ Head classes.

### Grazing Fee Annual Average Rates, 1993-2002 1/

| Year | Per Animal Unit 2/       | Cow-Calf | Per Head |
|------|--------------------------|----------|----------|
|      | <i>Dollars Per Month</i> |          |          |
| 1993 | 10.40                    | 13.30    | 11.20    |
| 1994 | 11.00                    | 13.10    | 11.80    |
| 1995 | 10.50                    | 12.80    | 11.10    |
| 1996 | 10.10                    | 12.20    | 11.90    |
| 1997 | 10.60                    | 13.00    | 12.00    |
| 1998 | 11.50                    | 14.50    | 12.90    |
| 1999 | 12.10                    | 15.00    | 12.50    |
| 2000 | 12.30                    | 15.50    | 12.70    |
| 2001 | 13.00                    | 16.00    | 13.50    |
| 2002 | 12.80                    | 16.50    | 14.00    |

1/ The average rates are estimates (rates over \$10.00 are rounded to the nearest dime) based on survey indications of monthly lease rates for private, non-irrigated grazing land from the January Agricultural Survey.

2/ Includes animal unit plus cow-calf rates. Cow-calf rate converted to animal unit (AUM) using (1 aum=cow-calf \*0.833).

### Hens and Pullets of Laying Age (HPLA) and Egg Production, 2001-2002

| Month                | Average Number of HPLA |               |                | Average Number of Eggs Per 100 Layers |               |                | Total Egg Production |                 |                |
|----------------------|------------------------|---------------|----------------|---------------------------------------|---------------|----------------|----------------------|-----------------|----------------|
|                      | 2001                   | 2002          | 2002/2001      | 2001                                  | 2002          | 2002/2001      | 2001                 | 2002            | 2002/2001      |
|                      | <i>1,000</i>           | <i>1,000</i>  | <i>Percent</i> | <i>Number</i>                         | <i>Number</i> | <i>Percent</i> | <i>Millions</i>      | <i>Millions</i> | <i>Percent</i> |
| December 1/          | 23,828                 | 23,932        | 100            | 2,187                                 | 2,215         | 101            | 521                  | 530             | 102            |
| January              | 23,536                 | 23,914        | 102            | 2,129                                 | 2,162         | 102            | 501                  | 517             | 103            |
| February             | 23,683                 | 24,037        | 101            | 1,896                                 | 1,956         | 103            | 449                  | 470             | 105            |
| March                | 23,303                 | 24,082        | 103            | 2,159                                 | 2,201         | 102            | 503                  | 530             | 105            |
| April                | 23,407                 | 23,723        | 101            | 2,097                                 | 2,104         | 100            | 491                  | 499             | 102            |
| May                  | 23,641                 | 23,479        | 99             | 2,141                                 | 2,173         | 101            | 506                  | 510             | 101            |
| June                 | 23,270                 | 23,593        | 101            | 2,114                                 | 2,137         | 101            | 492                  | 504             | 102            |
| July                 | 23,118                 | 23,425        | 101            | 2,189                                 | 2,208         | 101            | 506                  | 517             | 102            |
| August               | 22,910                 | 23,269        | 102            | 2,196                                 | 2,205         | 100            | 503                  | 513             | 102            |
| September            | 23,139                 | 23,649        | 102            | 2,122                                 | 2,136         | 101            | 491                  | 505             | 103            |
| October              | 23,660                 | 23,664        | 100            | 2,198                                 | 2,215         | 101            | 520                  | 524             | 101            |
| November             | 23,749                 | 23,059        | 97             | 2,169                                 | 2,190         | 101            | 515                  | 505             | 98             |
| <b>Average/Total</b> | <b>23,437</b>          | <b>23,652</b> | <b>101</b>     | <b>2,133</b>                          | <b>2,159</b>  | <b>101</b>     | <b>5,998</b>         | <b>6,124</b>    | <b>102</b>     |

1/ December of previous year.

### Broiler Production and Value, 1993-2002 1/

| Year | Broilers          | Average Live Weight | Meat Produced       | Value Per Pound 2/ | Total Value 3/ |
|------|-------------------|---------------------|---------------------|--------------------|----------------|
|      | <i>1,000 Head</i> | <i>Pounds</i>       | <i>1,000 Pounds</i> | <i>Cents</i>       | <i>\$1,000</i> |
| 1993 | 216,000           | 5.1                 | 1,101,600           | 32.0               | 352,512        |
| 1994 | 226,200           | 5.0                 | 1,131,000           | 33.0               | 373,230        |
| 1995 | 235,800           | 5.0                 | 1,179,000           | 32.5               | 383,175        |
| 1996 | 234,200           | 5.0                 | 1,171,000           | 39.0               | 456,690        |
| 1997 | 237,300           | 5.0                 | 1,210,200           | 39.0               | 471,978        |
| 1998 | ---               | ---                 | ---                 | ---                | ---            |
| 1999 | ---               | ---                 | ---                 | ---                | ---            |
| 2000 | ---               | ---                 | ---                 | ---                | ---            |
| 2001 | ---               | ---                 | ---                 | ---                | ---            |
| 2002 | ---               | ---                 | ---                 | ---                | ---            |

1/ Data not published in 1998, 1999, 2000, 2001 and 2002 to avoid disclosure of individual operations.

2/ Live weight equivalent price.

3/ Gross income including home consumption.

### Egg Production and Value, 1993-2002 1/

| Year | Eggs            | Value Per Dozen 2/ | Total Value    |
|------|-----------------|--------------------|----------------|
|      | <i>Millions</i> | <i>Cents</i>       | <i>\$1,000</i> |
| 1993 | 7,029           | 49.1               | 287,603        |
| 1994 | 6,602           | 46.4               | 255,277        |
| 1995 | 6,444           | 53.7               | 288,869        |
| 1996 | 6,569           | 67.1               | 367,317        |
| 1997 | 6,663           | 62.1               | 344,810        |
| 1998 | 6,608           | 56.1               | 308,924        |
| 1999 | 6,606           | 47.9               | 263,690        |
| 2000 | 6,293           | 45.3               | 237,561        |
| 2001 | 5,998           | 47.2               | 235,921        |
| 2002 | 6,124           | 39.2               | 200,051        |

1/ Data covers the 12-month period of December 1 (of the previous year) through November 30.

2/ Average of all eggs, including hatching eggs.



### Turkey Production and Value, 1993-2002

| Year | Turkeys           | Meat Produced       | Value Per Pound 1/ | Total Value    |
|------|-------------------|---------------------|--------------------|----------------|
|      | <i>1,000 Head</i> | <i>1,000 Pounds</i> | <i>Cents</i>       | <i>\$1,000</i> |
| 1993 | 22,500            | 486,000             | 43.0               | 208,980        |
| 1994 | 21,000            | 449,400             | 43.0               | 193,242        |
| 1995 | 22,000            | 462,000             | 46.0               | 212,520        |
| 1996 | 22,500            | 492,750             | 45.0               | 221,738        |
| 1997 | 21,000            | 480,900             | 42.0               | 201,978        |
| 1998 | 19,000            | 442,700             | 41.0               | 181,507        |
| 1999 | 17,500            | 428,750             | 45.0               | 192,938        |
| 2000 | 18,000            | 439,200             | 48.0               | 210,816        |
| 2001 | 18,700            | 450,670             | 47.0               | 211,815        |
| 2002 | 17,700            | 438,960             | 36.0               | 158,026        |

1/ Live weight equivalent price.

### Hogs and Pigs by Class as of December 1, 1993-2002

| Year | Hogs and Pigs |          | Market Hogs     |               |                |                     |       |
|------|---------------|----------|-----------------|---------------|----------------|---------------------|-------|
|      | All           | Breeding | Under 60 Pounds | 60-119 Pounds | 120-179 Pounds | 180 Pounds and Over | Total |
|      | 1,000 Head    |          |                 |               |                |                     |       |
| 1993 | 260           | 33       | 74              | 60            | 49             | 44                  | 227   |
| 1994 | 255           | 32       | 70              | 65            | 45             | 43                  | 223   |
| 1995 | 240           | 31       | 65              | 58            | 44             | 42                  | 209   |
| 1996 | 210           | 27       | 57              | 51            | 40             | 35                  | 183   |
| 1997 | 210           | 27       | 60              | 45            | 45             | 33                  | 183   |
| 1998 | 210           | 27       | 70              | 50            | 40             | 23                  | 183   |
| 1999 | 190           | 25       | 55              | 50            | 35             | 25                  | 165   |
| 2000 | 150           | 20       | 32              | 43            | 45             | 10                  | 130   |
| 2001 | 110           | 20       | 35              | 25            | 11             | 19                  | 90    |
| 2002 | 135           | 21       | 34              | 29            | 26             | 25                  | 114   |

### Sows Farrowed and Pig Crop, 1993-2002

| Year | December - November |                   |                 |
|------|---------------------|-------------------|-----------------|
|      | Sows Farrowed       | Pig Crop          | Pigs Per Litter |
|      | <i>1,000 Head</i>   | <i>1,000 Head</i> | <i>Number</i>   |
| 1993 | 58                  | 484               | 8.3             |
| 1994 | 53                  | 463               | 8.7             |
| 1995 | 48                  | 422               | 8.8             |
| 1996 | 42                  | 390               | 9.3             |
| 1997 | 45                  | 416               | 9.2             |
| 1998 | 44                  | 404               | 9.2             |
| 1999 | 43                  | 399               | 9.3             |
| 2000 | 40                  | 371               | 9.3             |
| 2001 | 27                  | 239               | 8.9             |
| 2002 | 33                  | 286               | 8.7             |

### Hogs and Pigs Inventory, Supply and Disposition, 1993-2002

| Year              | Beginning Inventory<br>December 1<br>(Previous Year) | Pig Crop<br>(Dec.-Nov.) | Inshipments 1/ | Marketings 2/ | Farm Slaughter 3/ | Deaths | Ending Inventory<br>December 1 |
|-------------------|------------------------------------------------------|-------------------------|----------------|---------------|-------------------|--------|--------------------------------|
| <i>1,000 Head</i> |                                                      |                         |                |               |                   |        |                                |
| 1993              | 265                                                  | 484                     | 40             | 472           | 25                | 32     | 260                            |
| 1994              | 260                                                  | 463                     | 40             | 448           | 21                | 39     | 255                            |
| 1995              | 255                                                  | 422                     | 40             | 413           | 24                | 40     | 240                            |
| 1996              | 240                                                  | 390                     | 30             | 383           | 22                | 45     | 210                            |
| 1997              | 210                                                  | 416                     | 51             | 400           | 15                | 52     | 210                            |
| 1998              | 210                                                  | 404                     | 40             | 377           | 12                | 55     | 210                            |
| 1999              | 210                                                  | 399                     | 40             | 391           | 8                 | 60     | 190                            |
| 2000              | 190                                                  | 371                     | 45             | 374           | 7                 | 75     | 150                            |
| 2001              | 150                                                  | 239                     | 30             | 278           | 6                 | 25     | 110                            |
| 2002              | 110                                                  | 295                     | 45             | 290           | 5                 | 20     | 135                            |

1/ For feeding or breeding, excludes stock brought in for immediate slaughter.

2/ Includes custom slaughter for use on farms where produced and State outshipments, but excludes interfarm sales.

3/ Excludes custom slaughter for farmers at commercial establishments.

### Hogs and Pigs Slaughtered Under Federal and State Inspections, 1993-2002

| Year              | Jan. | Feb. | Mar. | Apr. | May | June | July | Aug. | Sept. | Oct. | Nov. | Dec. | Annual Total 1/ |
|-------------------|------|------|------|------|-----|------|------|------|-------|------|------|------|-----------------|
| <i>1,000 Head</i> |      |      |      |      |     |      |      |      |       |      |      |      |                 |
| 1993              | 145  | 141  | 151  | 150  | 145 | 163  | 155  | 162  | 160   | 165  | 155  | 163  | 1,856           |
| 1994              | 163  | 160  | 159  | 156  | 151 | 164  | 146  | 166  | 168   | 158  | 156  | 177  | 1,924           |
| 1995              | 169  | 141  | 176  | 152  | 177 | 164  | 155  | 175  | 157   | 164  | 163  | 171  | 1,964           |
| 1996              | 176  | 168  | 165  | 171  | 165 | 151  | 164  | 173  | 162   | 182  | 158  | 183  | 2,017           |
| 1997              | 172  | 152  | 160  | 159  | 155 | 154  | 160  | 156  | 161   | 171  | 149  | 190  | 1,937           |
| 1998              | 183  | 155  | 169  | 173  | 170 | 180  | 188  | 190  | 207   | 204  | 189  | 205  | 2,212           |
| 1999              | 208  | 188  | 203  | 204  | 193 | 190  | 191  | 192  | 199   | 193  | 188  | 202  | 2,350           |
| 2000              | 193  | 180  | 202  | 175  | 195 | 189  | 173  | 201  | 183   | 205  | 186  | 195  | 2,278           |
| 2001              | 205  | 172  | 196  | 186  | 191 | 179  | 182  | 205  | 184   | 219  | 218  | 231  | 2,367           |
| 2002              | 208  | 176  | 186  | 196  | 204 | 185  | 208  | 214  | 206   | 232  | 187  | 228  | 2,429           |

1/ Totals may not equal sum of parts due to rounding.

### Average Live Weights of Hogs and Pigs Slaughtered Under Federal and State Inspections, 1993-2002

| Year          | Jan. | Feb. | Mar. | Apr. | May | June | July | Aug. | Sept. | Oct. | Nov. | Dec. | Annual Average |
|---------------|------|------|------|------|-----|------|------|------|-------|------|------|------|----------------|
| <i>Pounds</i> |      |      |      |      |     |      |      |      |       |      |      |      |                |
| 1993          | 222  | 229  | 223  | 222  | 228 | 224  | 226  | 221  | 221   | 224  | 225  | 223  | 224            |
| 1994          | 223  | 222  | 219  | 227  | 221 | 227  | 217  | 217  | 216   | 224  | 224  | 229  | 222            |
| 1995          | 225  | 224  | 235  | 238  | 241 | 231  | 224  | 223  | 215   | 219  | 224  | 218  | 227            |
| 1996          | 219  | 216  | 217  | 216  | 217 | 214  | 215  | 213  | 212   | 216  | 216  | 214  | 215            |
| 1997          | 212  | 212  | 214  | 214  | 216 | 211  | 208  | 206  | 209   | 212  | 216  | 212  | 212            |
| 1998          | 210  | 215  | 215  | 210  | 213 | 208  | 208  | 207  | 211   | 211  | 213  | 210  | 211            |
| 1999          | 216  | 212  | 214  | 217  | 215 | 212  | 213  | 210  | 208   | 214  | 216  | 218  | 214            |
| 2000          | 219  | 213  | 219  | 217  | 218 | 215  | 213  | 216  | 218   | 223  | 222  | 220  | 218            |
| 2001          | 217  | 220  | 223  | 224  | 221 | 221  | 222  | 222  | 223   | 228  | 229  | 230  | 224            |
| 2002          | 229  | 225  | 231  | 234  | 239 | 236  | 229  | 226  | 230   | 234  | 236  | 238  | 232            |

### Sheep and Lambs by Class as of January 1, 1994-2003

| Year | All Sheep 1/ | Sheep and Lambs<br>On Feed<br>for Market 1/ | Stock Sheep       |                   |                             |       |
|------|--------------|---------------------------------------------|-------------------|-------------------|-----------------------------|-------|
|      |              |                                             | Ewes 1 Yr. +      | Replacement Lambs | Wethers and Rams<br>1 Yr. + | Total |
|      |              |                                             | <i>1,000 Head</i> |                   |                             |       |
| 1994 | 1,080        | 600                                         | 400               | 65                | 15                          | 480   |
| 1995 | 1,020        | 520                                         | 430               | 55                | 15                          | 500   |
| 1996 | 920          | 495                                         | 355               | 55                | 15                          | 425   |
| 1997 | 880          | 455                                         | 360               | 50                | 15                          | 425   |
| 1998 | 800          | 410                                         | 345               | 35                | 10                          | 390   |
| 1999 | 810          | 420                                         | 330               | 45                | 15                          | 390   |
| 2000 | 800          | 420                                         | 320               | 45                | 15                          | 380   |
| 2001 | 840          | 465                                         | 320               | 40                | 15                          | 375   |
| 2002 | 800          | 430                                         | 310               | 45                | 15                          | 370   |
| 2003 | 790          | 435                                         | 295               | 50                | 10                          | 355   |

1/ Beginning in 1994, totals include new crop lambs.

### Sheep and Lambs Shorn, Wool Production and Value, 1993-2002

| Year | Sheep and Lambs<br>Shorn | Production    |                     | Value<br>Per Pound | Total<br>Value |
|------|--------------------------|---------------|---------------------|--------------------|----------------|
|      |                          | Per Animal    | Total               |                    |                |
|      |                          | <i>Pounds</i> | <i>1,000 Pounds</i> |                    |                |
|      | <i>1,000 Head</i>        |               |                     | <i>Dollars</i>     | <i>\$1,000</i> |
| 1993 | 800                      | 7.6           | 6,044               | 0.46               | 2,780          |
| 1994 | 695                      | 7.7           | 5,318               | 0.65               | 3,457          |
| 1995 | 690                      | 7.6           | 5,250               | 1.02               | 5,355          |
| 1996 | 580                      | 7.6           | 4,380               | 0.67               | 2,935          |
| 1997 | 470                      | 8.1           | 3,800               | 0.79               | 3,002          |
| 1998 | 480                      | 7.5           | 3,600               | 0.61               | 2,196          |
| 1999 | 480                      | 7.6           | 3,630               | 0.35               | 1,271          |
| 2000 | 530                      | 7.5           | 4,000               | 0.29               | 1,160          |
| 2001 | 510                      | 7.4           | 3,750               | 0.35               | 1,313          |
| 2002 | 520                      | 7.0           | 3,650               | 0.45               | 1,643          |

### Sheep and Lambs Inventory, Supply and Disposition, 1993-2002

| Year | Beginning<br>Inventory<br>January 1 1/ | Lamb Crop | Inshipments | Marketings 2/ |       | Farm<br>Slaughter<br>Sheep and<br>Lambs | Deaths |       | Ending<br>Inventory<br>January 1 1/ |
|------|----------------------------------------|-----------|-------------|---------------|-------|-----------------------------------------|--------|-------|-------------------------------------|
|      |                                        |           |             | Sheep         | Lambs |                                         | Sheep  | Lambs |                                     |
|      | 1,000 Head                             |           |             |               |       |                                         |        |       |                                     |
| 1993 | 895                                    | 370       | 469         | 139           | 718   | 5                                       | 25     | 27    | 1,080                               |
| 1994 | 1,080                                  | 400       | 320         | 50            | 676   | 6                                       | 24     | 24    | 1,020                               |
| 1995 | 1,020                                  | 330       | 375         | 120           | 634   | 5                                       | 29     | 17    | 920                                 |
| 1996 | 920                                    | 330       | 435         | 40            | 722   | 5                                       | 24     | 14    | 880                                 |
| 1997 | 880                                    | 320       | 365         | 57            | 667   | 5                                       | 22     | 14    | 800                                 |
| 1998 | 800                                    | 310       | 313         | 51            | 521   | 5                                       | 23     | 13    | 810                                 |
| 1999 | 810                                    | 290       | 360         | 56            | 564   | 5                                       | 23     | 12    | 800                                 |
| 2000 | 800                                    | 310       | 355         | 45            | 542   | 5                                       | 19     | 14    | 840                                 |
| 2001 | 840                                    | 290       | 305         | 47            | 553   | 5                                       | 17     | 13    | 800                                 |
| 2002 | 800                                    | 285       | 320         | 61            | 517   | 5                                       | 18     | 14    | 790                                 |

1/ Beginning in 1994, totals include new crop lambs.

2/ Includes custom slaughter for use on farms where produced, but excludes interfarm sales within the State.

### Sheep and Lambs Average Prices Received, 1993-2002

| Year                    | Jan.  | Feb.  | Mar.  | Apr.  | May   | June  | July   | Aug.  | Sept. | Oct.  | Nov.  | Dec.  | Annual<br>Average 1/ |
|-------------------------|-------|-------|-------|-------|-------|-------|--------|-------|-------|-------|-------|-------|----------------------|
| <i>Dollars Per Cwt.</i> |       |       |       |       |       |       |        |       |       |       |       |       |                      |
| <b>Sheep</b>            |       |       |       |       |       |       |        |       |       |       |       |       |                      |
| 1993                    | 30.00 | 31.10 | 32.00 | 29.00 | 26.00 | 24.50 | 24.00  | 26.00 | 25.00 | 23.00 | 24.00 | 27.50 | 25.80                |
| 1994                    | 32.20 | 32.70 | 31.50 | 29.10 | 27.10 | 29.10 | 24.30  | 30.80 | 29.00 | 27.70 | 26.70 | 35.80 | 29.10                |
| 1995                    | 29.90 | 34.70 | 28.60 | 26.10 | 22.40 | 24.00 | 25.10  | 24.00 | 24.00 | 23.70 | 22.00 | 27.00 | 24.80                |
| 1996                    | 30.00 | 31.00 | 29.00 | 27.00 | 25.00 | 24.50 | 26.50  | 27.50 | 24.50 | 28.50 | 28.50 | 34.00 | 26.70                |
| 1997                    | 35.00 | 37.00 | 37.00 | 37.00 | 30.00 | 33.00 | 32.00  | 36.00 | 30.00 | 34.00 | 35.00 | 37.00 | 33.80                |
| 1998                    | 35.50 | 33.00 | 36.50 | 35.50 | 30.00 | 32.00 | 29.00  | 29.00 | 27.50 | 26.50 | 25.50 | 28.50 | 30.50                |
| 1999                    | 28.50 | 30.00 | 33.00 | 31.50 | 29.00 | 24.50 | 26.00  | 29.50 | 28.00 | 27.00 | 27.00 | 33.50 | 28.70                |
| 2000                    | 30.00 | 31.50 | 37.50 | 36.00 | 31.50 | 28.00 | 31.00  | 31.50 | 28.50 | 30.50 | 31.50 | 34.00 | 31.50                |
| 2001                    | 40.50 | 38.00 | 39.50 | 31.50 | 31.00 | 26.50 | 29.50  | 31.50 | 28.50 | 26.50 | 24.00 | 31.50 | 30.20                |
| 2002                    | 30.00 | 30.00 | 31.00 | 27.50 | 27.00 | 22.00 | 26.00  | 29.50 | 30.50 | 25.50 | 34.00 | 36.50 | 27.10                |
| <b>Lambs</b>            |       |       |       |       |       |       |        |       |       |       |       |       |                      |
| 1993                    | 65.10 | 71.70 | 74.50 | 71.00 | 66.00 | 62.00 | 60.00  | 59.00 | 63.00 | 62.50 | 64.50 | 65.50 | 65.70                |
| 1994                    | 60.90 | 58.80 | 58.30 | 55.30 | 54.40 | 61.90 | 71.50  | 76.00 | 74.80 | 73.80 | 72.70 | 76.70 | 65.60                |
| 1995                    | 69.60 | 71.00 | 76.70 | 77.00 | 78.70 | 84.00 | 86.00  | 86.50 | 83.00 | 80.00 | 78.00 | 78.50 | 79.20                |
| 1996                    | 79.50 | 84.00 | 85.50 | 86.00 | 89.00 | 98.00 | 100.00 | 94.00 | 90.00 | 90.00 | 84.00 | 88.00 | 89.40                |
| 1997                    | 92.00 | 98.00 | 99.00 | 97.00 | 94.00 | 91.00 | 87.00  | 90.00 | 89.00 | 86.50 | 84.50 | 85.00 | 91.60                |
| 1998                    | 81.50 | 78.00 | 71.00 | 69.00 | 63.00 | 90.00 | 84.00  | 79.00 | 78.00 | 71.00 | 64.00 | 66.00 | 74.80                |
| 1999                    | 68.00 | 68.50 | 66.00 | 68.00 | 83.00 | 81.00 | 75.50  | 80.00 | 77.50 | 73.00 | 74.00 | 77.00 | 74.80                |
| 2000                    | 72.00 | 72.00 | 80.00 | 81.00 | 91.00 | 90.00 | 87.00  | 83.00 | 79.00 | 75.00 | 70.00 | 68.00 | 79.10                |
| 2001                    | 69.00 | 78.00 | 80.00 | 78.00 | 76.50 | 72.00 | 68.00  | 60.00 | 56.00 | 51.50 | 50.00 | 57.00 | 67.30                |
| 2002                    | 60.50 | 63.50 | 63.00 | 61.00 | 62.00 | 72.50 | 75.00  | 73.50 | 74.50 | 74.50 | 77.00 | 79.00 | 69.40                |

1/ Average weighted by amount sold each month.

# Livestock Production and Income, 1993-2002

| Year                     | Production 1/       | Marketings 2/       | Average Price<br>Per 100 Pounds |                 | Value of<br>Production | Cash<br>Receipts 3/ 4/ | Value of Home<br>Consumption | Gross<br>Income |
|--------------------------|---------------------|---------------------|---------------------------------|-----------------|------------------------|------------------------|------------------------------|-----------------|
|                          | <i>1,000 Pounds</i> | <i>1,000 Pounds</i> | <i>Dollars</i>                  | <i>Dollars</i>  | <i>\$1,000</i>         | <i>\$1,000</i>         | <i>\$1,000</i>               | <i>\$1,000</i>  |
| <b>All Livestock</b>     |                     |                     |                                 |                 |                        |                        |                              |                 |
| 1993                     | 2,024,599           | 2,586,056           | ---                             | ---             | 1,244,511              | 1,671,059              | 15,642                       | 1,686,701       |
| 1994                     | 1,943,849           | 2,539,514           | ---                             | ---             | 1,061,164              | 1,468,824              | 13,820                       | 1,482,644       |
| 1995                     | 1,918,670           | 2,622,058           | ---                             | ---             | 851,750                | 1,262,481              | 12,723                       | 1,275,204       |
| 1996                     | 1,872,910           | 2,588,462           | ---                             | ---             | 762,188                | 1,158,997              | 11,067                       | 1,170,064       |
| 1997                     | 2,075,249           | 2,728,265           | ---                             | ---             | 988,026                | 1,385,084              | 12,803                       | 1,397,887       |
| 1998                     | 1,974,094           | 2,323,708           | ---                             | ---             | 912,615                | 1,127,393              | 11,266                       | 1,138,659       |
| 1999                     | 2,097,648           | 2,617,115           | ---                             | ---             | 922,975                | 1,308,778              | 11,798                       | 1,320,576       |
| 2000                     | 2,045,587           | 2,516,273           | ---                             | ---             | 900,474                | 1,311,939              | 10,341                       | 1,322,280       |
| 2001                     | 2,096,705           | 2,578,540           | ---                             | ---             | 1,002,408              | 1,433,664              | 10,876                       | 1,444,540       |
| 2002                     | 1,993,138           | 2,471,985           | ---                             | ---             | 924,271                | 1,301,298              | 10,294                       | 1,311,592       |
| <b>Cattle and Calves</b> |                     |                     |                                 |                 |                        |                        |                              |                 |
|                          |                     |                     | <i>(Cattle)</i>                 | <i>(Calves)</i> |                        |                        |                              |                 |
| 1993                     | 1,829,597           | 2,372,090           | 64.80                           | 94.30           | 1,138,047              | 1,553,634              | 12,755                       | 1,566,389       |
| 1994                     | 1,795,879           | 2,356,220           | 57.40                           | 85.60           | 986,137                | 1,368,770              | 11,125                       | 1,379,895       |
| 1995                     | 1,775,864           | 2,436,000           | 47.00                           | 69.40           | 777,753                | 1,159,032              | 10,050                       | 1,169,082       |
| 1996                     | 1,736,019           | 2,410,790           | 42.40                           | 55.70           | 673,737                | 1,033,513              | 7,856                        | 1,041,369       |
| 1997                     | 1,936,801           | 2,550,150           | 48.80                           | 68.10           | 895,678                | 1,257,018              | 10,205                       | 1,267,223       |
| 1998                     | 1,849,594           | 2,171,350           | 47.80                           | 70.90           | 851,681                | 1,048,300              | 9,509                        | 1,057,809       |
| 1999                     | 1,972,129           | 2,454,890           | 49.00                           | 79.10           | 861,952                | 1,223,123              | 10,240                       | 1,233,363       |
| 2000                     | 1,923,165           | 2,359,040           | 50.00                           | 93.00           | 831,338                | 1,218,220              | 8,614                        | 1,226,834       |
| 2001                     | 1,992,326           | 2,437,100           | 53.90                           | 94.10           | 945,486                | 1,353,837              | 9,239                        | 1,363,076       |
| 2002                     | 1,880,884           | 2,330,200           | 50.80                           | 85.40           | 871,445                | 1,228,722              | 8,947                        | 1,237,669       |
| <b>Sheep and Lambs</b>   |                     |                     |                                 |                 |                        |                        |                              |                 |
|                          |                     |                     | <i>(Sheep)</i>                  | <i>(Lambs)</i>  |                        |                        |                              |                 |
| 1993                     | 91,777              | 110,702             | 25.80                           | 65.70           | 54,507                 | 65,078                 | 575                          | 65,653          |
| 1994                     | 52,725              | 87,402              | 29.10                           | 65.60           | 30,709                 | 54,868                 | 745                          | 55,613          |
| 1995                     | 53,813              | 96,313              | 24.80                           | 79.20           | 38,797                 | 67,411                 | 793                          | 68,204          |
| 1996                     | 59,076              | 97,247              | 26.70                           | 89.40           | 48,011                 | 83,589                 | 975                          | 84,564          |
| 1997                     | 56,292              | 93,750              | 33.80                           | 91.60           | 47,840                 | 81,505                 | 954                          | 82,459          |
| 1998                     | 49,167              | 73,493              | 30.50                           | 74.80           | 35,458                 | 51,960                 | 798                          | 52,758          |
| 1999                     | 47,254              | 80,280              | 28.70                           | 74.80           | 33,669                 | 56,601                 | 783                          | 57,384          |
| 2000                     | 49,807              | 77,308              | 31.50                           | 79.10           | 37,338                 | 58,156                 | 813                          | 58,969          |
| 2001                     | 51,640              | 82,340              | 30.20                           | 67.30           | 33,349                 | 52,974                 | 712                          | 53,686          |
| 2002                     | 47,849              | 77,835              | 27.10                           | 69.40           | 31,434                 | 50,388                 | 710                          | 51,098          |
| <b>Hogs and Pigs</b>     |                     |                     |                                 |                 |                        |                        |                              |                 |
|                          |                     |                     | <i>(Hogs and<br/>Pigs)</i>      |                 |                        |                        |                              |                 |
| 1993                     | 103,225             | 103,264             | 50.40                           | ---             | 51,957                 | 52,347                 | 2,312                        | 54,659          |
| 1994                     | 95,245              | 95,892              | 46.70                           | ---             | 44,318                 | 45,186                 | 1,950                        | 47,136          |
| 1995                     | 88,993              | 89,745              | 39.70                           | ---             | 35,200                 | 36,038                 | 1,880                        | 37,918          |
| 1996                     | 77,815              | 80,425              | 52.00                           | ---             | 40,440                 | 41,895                 | 2,236                        | 44,131          |
| 1997                     | 82,156              | 84,365              | 54.70                           | ---             | 44,508                 | 46,561                 | 1,644                        | 48,205          |
| 1998                     | 75,333              | 78,865              | 34.00                           | ---             | 25,476                 | 27,133                 | 959                          | 28,092          |
| 1999                     | 78,265              | 81,945              | 35.10                           | ---             | 27,354                 | 29,054                 | 775                          | 29,829          |
| 2000                     | 72,615              | 79,925              | 44.10                           | ---             | 31,798                 | 35,563                 | 914                          | 36,477          |
| 2001                     | 52,739              | 59,100              | 44.90                           | ---             | 23,573                 | 26,853                 | 925                          | 27,778          |
| 2002                     | 64,405              | 63,950              | 34.20                           | ---             | 21,392                 | 22,188                 | 637                          | 22,825          |

1/ Live weight; adjustments made for changes in inventory and for inshipments.

2/ Live weight; excludes custom slaughter for use on farms where produced and interfarm sales within the State.

3/ Receipts from marketing and sale of farm slaughter.

4/ Hogs and pigs receipts for 1995 and 1996 include allowance for higher average price of State inshipments and outshipments of feeder pigs.

**California Livestock Inventory by Class and County, January 1, 2002-2003**

| County                   | 2002             |                |                  | 2003             |                |                  |
|--------------------------|------------------|----------------|------------------|------------------|----------------|------------------|
|                          | All Cattle       | Beef Cows      | Milk Cows        | All Cattle       | Beef Cows      | Milk Cows        |
| Del Norte                | 6,000            | 1,000          | ---              | 9,000            | 1,000          | ---              |
| Humboldt                 | 70,000           | 22,000         | 16,700           | 63,000           | 19,000         | 18,000           |
| Mendocino                | 27,000           | 12,000         | ---              | 22,000           | 10,000         | ---              |
| <b>District 10 Total</b> | <b>103,000</b>   | <b>35,000</b>  | <b>16,700</b>    | <b>94,000</b>    | <b>30,000</b>  | <b>18,000</b>    |
| Shasta                   | 40,000           | 22,000         | ---              | 41,000           | 24,000         | ---              |
| Siskiyou                 | 63,000           | 31,000         | 1,900            | 64,000           | 32,000         | 2,400            |
| Trinity                  | 4,000            | 3,000          | ---              | 5,000            | 2,000          | ---              |
| <b>District 20 Total</b> | <b>107,000</b>   | <b>56,000</b>  | <b>1,900</b>     | <b>110,000</b>   | <b>58,000</b>  | <b>2,400</b>     |
| Lassen                   | 50,000           | 25,000         | ---              | 50,000           | 28,000         | ---              |
| Modoc                    | 86,000           | 42,000         | ---              | 83,000           | 41,000         | ---              |
| Plumas                   | 14,000           | 6,000          | ---              | 14,000           | 6,000          | ---              |
| <b>District 30 Total</b> | <b>150,000</b>   | <b>73,000</b>  | ---              | <b>147,000</b>   | <b>75,000</b>  | ---              |
| Alameda                  | 28,000           | 12,000         | ---              | 31,000           | 12,000         | ---              |
| Contra Costa             | 25,000           | 8,000          | 3,000            | 24,000           | 7,000          | ---              |
| Lake                     | 6,000            | 3,000          | ---              | 8,000            | 5,000          | ---              |
| Marin                    | 39,000           | 9,000          | 10,000           | 37,000           | 8,000          | 9,700            |
| Monterey                 | 102,000          | 32,000         | 2,200            | 96,000           | 26,000         | 1,300            |
| Napa                     | 8,000            | 4,000          | ---              | 8,000            | 3,000          | ---              |
| San Benito               | 39,000           | 16,000         | 800              | 36,000           | 12,000         | 600              |
| San Francisco            | ---              | ---            | ---              | ---              | ---            | ---              |
| San Luis Obispo          | 90,000           | 39,000         | ---              | 94,000           | 36,000         | 800              |
| San Mateo                | 4,000            | 2,000          | ---              | 3,000            | 1,000          | ---              |
| Santa Clara              | 20,000           | 10,000         | ---              | 20,000           | 9,000          | ---              |
| Santa Cruz               | 3,000            | 2,000          | ---              | 3,000            | 1,000          | ---              |
| Sonoma                   | 86,000           | 15,000         | 31,500           | 88,000           | 13,000         | 33,000           |
| <b>District 40 Total</b> | <b>450,000</b>   | <b>152,000</b> | <b>47,500</b>    | <b>448,000</b>   | <b>133,000</b> | <b>45,400</b>    |
| Butte                    | 17,000           | 7,000          | 800              | 19,000           | 8,000          | 900              |
| Colusa                   | 22,000           | 8,000          | ---              | 24,000           | 10,000         | ---              |
| Glenn                    | 68,000           | 18,000         | 15,700           | 70,000           | 18,000         | 17,000           |
| Sacramento               | 63,000           | 14,000         | 17,000           | 73,000           | 15,000         | 16,700           |
| Solano                   | 25,000           | 8,000          | 1,500            | 40,000           | 14,000         | 3,900            |
| Sutter                   | 9,000            | 3,000          | ---              | 10,000           | 5,000          | ---              |
| Tehama                   | 76,000           | 32,000         | 5,500            | 71,000           | 30,000         | 5,300            |
| Yolo                     | 19,000           | 8,000          | 2,000            | 20,000           | 12,000         | 2,000            |
| Yuba                     | 36,000           | 6,000          | 3,500            | 33,000           | 6,000          | 3,200            |
| <b>District 50 Total</b> | <b>335,000</b>   | <b>104,000</b> | <b>46,000</b>    | <b>360,000</b>   | <b>118,000</b> | <b>49,000</b>    |
| Fresno                   | 413,000          | 20,000         | 88,000           | 400,000          | 20,000         | 85,000           |
| Kern                     | 220,000          | 41,000         | 78,000           | 235,000          | 40,000         | 85,000           |
| Kings                    | 200,000          | 4,000          | 132,000          | 250,000          | 5,000          | 149,000          |
| Madera                   | 128,000          | 16,000         | 48,000           | 125,000          | 18,000         | 48,000           |
| Merced                   | 428,000          | 32,000         | 221,000          | 440,000          | 30,000         | 225,000          |
| San Joaquin              | 237,000          | 21,000         | 105,000          | 235,000          | 21,000         | 103,000          |
| Stanislaus               | 435,000          | 46,000         | 164,000          | 450,000          | 45,000         | 164,000          |
| Tulare                   | 706,000          | 31,000         | 394,000          | 765,000          | 30,000         | 426,000          |
| <b>District 51 Total</b> | <b>2,767,000</b> | <b>211,000</b> | <b>1,230,000</b> | <b>2,900,000</b> | <b>209,000</b> | <b>1,285,000</b> |
| Alpine                   | 3,000            | 2,000          | ---              | 2,000            | 2,000          | ---              |
| Amador                   | 28,000           | 12,000         | ---              | 23,000           | 11,000         | ---              |
| Calaveras                | 23,000           | 13,000         | ---              | 26,000           | 13,000         | ---              |
| El Dorado                | 11,000           | 5,000          | ---              | 10,000           | 4,000          | ---              |
| Inyo                     | 14,000           | 8,000          | ---              | 16,000           | 8,000          | ---              |
| Mariposa                 | 19,000           | 8,000          | ---              | 17,000           | 6,000          | ---              |
| Mono                     | 7,000            | 4,000          | ---              | 6,000            | 3,000          | ---              |
| Nevada                   | 8,000            | 5,000          | ---              | 6,000            | 3,000          | ---              |
| Placer                   | 26,000           | 10,000         | ---              | 23,000           | 8,000          | ---              |
| Sierra                   | 7,000            | 3,000          | ---              | 9,000            | 4,000          | ---              |
| Tuolumne                 | 17,000           | 7,000          | ---              | 13,000           | 6,000          | ---              |
| <b>District 60 Total</b> | <b>163,000</b>   | <b>77,000</b>  | ---              | <b>151,000</b>   | <b>68,000</b>  | ---              |
| Imperial                 | 530,000          | 1,000          | ---              | 485,000          | 3,000          | ---              |
| Los Angeles              | 13,000           | 5,000          | ---              | 7,000            | 3,000          | ---              |
| Orange                   | 3,000            | 1,000          | ---              | 2,000            | 1,000          | ---              |
| Riverside                | 180,000          | 6,000          | 100,000          | 170,000          | 7,000          | 98,000           |
| San Bernardino           | 277,000          | 3,000          | 153,000          | 277,000          | 3,000          | 159,000          |
| San Diego                | 27,000           | 7,000          | 6,000            | 24,000           | 6,000          | 5,700            |
| Santa Barbara            | 62,000           | 24,000         | 3,000            | 50,000           | 22,000         | 2,500            |
| Ventura                  | 13,000           | 5,000          | ---              | 10,000           | 4,000          | ---              |
| <b>District 80 Total</b> | <b>1,105,000</b> | <b>52,000</b>  | <b>262,000</b>   | <b>1,025,000</b> | <b>49,000</b>  | <b>265,200</b>   |
| Other Districts 1/       | 20,000           | ---            | 15,900           | 15,000           | ---            | 15,000           |
| <b>STATE</b>             | <b>5,200,000</b> | <b>760,000</b> | <b>1,620,000</b> | <b>5,250,000</b> | <b>740,000</b> | <b>1,680,000</b> |

1/ Includes counties from one or more districts to avoid disclosure of individual operations.

# California Vegetable and Melon Crops

California's diverse climate allows for year-round production of many vegetables, beginning in the desert during winter months and then heading into the Central Valley and coastal areas as the season progresses.

California continues to lead the nation in vegetable and melon production, accounting for 41 percent of the harvested acreage, 67 percent of production, and 58 percent of total value.

In real terms, the Golden State produced 26.7 million tons of vegetables and melons in 2002. Total value of vegetable and melon production was \$6.21 billion. These figures represent a 12 percent increase in production and a 2 percent increase in value of production from 2001.

Artichokes, broccoli, snap beans, sweet corn, leaf and romaine lettuce, spinach, fresh and processing tomatoes, and watermelon showed large increases in value. There were notable decreases in value for asparagus, cantaloupes, honeydews, celery, garlic, head lettuce, and fresh and processing cucumbers.

In 2002, California produced 95 percent of processing tomatoes in the country, with most coming from rich farmland in the Sacramento and San Joaquin valleys. The Golden State also accounts for more than 90 percent of the nation's production of artichokes, broccoli, and celery. Additionally, California is home to more than 75 percent of the national production of cauliflower, fresh market carrots, garlic, honeydews, and leaf and romaine lettuce. Monterey County's fertile Salinas Valley is known worldwide for its abundant, high-quality vegetable crops, particularly artichokes, broccoli, cauliflower, celery, and lettuce.

The month of January delivered the expected rainfall and cooler temperatures that slowed winter-vegetable crop development and delayed harvest. Precipitation was near normal in the Sacramento and San Joaquin valleys, but below normal in the coastal areas. In late January and early February, cold, frosty conditions slowed growth of some vegetables and there were reports of some lettuce damaged by frost.

Warmer temperatures in late February encouraged plant growth and harvesting resumed. Seasonal storms brought rain to the valleys, but precipitation remained below normal in the vegetable growing areas in the central and south coast, as well as the desert areas. Harvesting of the winter vegetables continued in the desert areas and then

moved into the San Joaquin Valley. As March began, a strong high-pressure ridge aloft off the west coast and by the offshore flow at the lower levels of the atmosphere dominated weather conditions. This combination resulted in very dry, warm daytime conditions and cool nights. Temperatures remained below normal for much of March and precipitation was near normal in the valleys, but remained below in the coastal areas. By early April, warm weather aided crop development and the vegetable crops flourished. Temperatures averaged a few degrees below normal for most of May, but the vegetable crops developed normally.

The remainder of the vegetable growing season was uneventful and planting and harvesting proceeded on schedule. The summer months were generally mild with no temperature extremes.

## Notable Changes in Vegetable Production from 2001 to 2002:

|                             |       |
|-----------------------------|-------|
| Beans, Snap .....           | + 28% |
| Carrots, Processing .....   | - 38% |
| Cucumbers, Processing ..... | + 14% |
| Spinach, Fresh .....        | + 21% |
| Tomatoes, Fresh .....       | + 13% |
| Tomatoes, Processing .....  | + 28% |

## Note to the Reader

Vegetable and melon estimates include commercial production, but exclude garden production and vegetables grown for seed. Prices for processing crops and processed segments of dual utilization crops are based on equivalent returns at the processing plant door.

For fresh market sales, the price is on a packed and loaded basis, free-on-board (f.o.b.) shipping point. To avoid disclosure of individual plants, not all of California's data were published.

# Vegetable and Melon Acreage, Production and Value, 1993-2002

| Crop                     | Crop Year | Harvested    | Yield Per Acre | Production        | Value Per Cwt. 1/ | Total Value    |
|--------------------------|-----------|--------------|----------------|-------------------|-------------------|----------------|
|                          |           | <i>Acres</i> | <i>Cwt.</i>    | <i>1,000 Cwt.</i> | <i>Dollars</i>    | <i>\$1,000</i> |
| Artichokes               | 1993      | 9,200        | 110            | 1,012             | 50.80             | 51,435         |
|                          | 1994      | 9,200        | 130            | 1,196             | 56.40             | 67,474         |
|                          | 1995      | 8,900        | 92             | 819               | 75.70             | 61,965         |
|                          | 1996      | 8,900        | 100            | 890               | 73.50             | 65,416         |
|                          | 1997      | 9,300        | 100            | 930               | 79.50             | 73,910         |
|                          | 1998      | 9,700        | 90             | 873               | 70.60             | 61,633         |
|                          | 1999      | 9,800        | 115            | 1,125             | 67.00             | 75,395         |
|                          | 2000      | 8,800        | 115            | 1,012             | 60.30             | 61,021         |
|                          | 2001      | 8,000        | 125            | 1,000             | 58.60             | 58,559         |
|                          | 2002      | 8,200        | 115            | 943               | 70.80             | 66,764         |
| Asparagus                | 1993      | 32,100       | 29             | 931               | 94.70             | 88,177         |
|                          | 1994      | 30,200       | 33             | 997               | 102.00            | 101,694        |
|                          | 1995      | 28,000       | 28             | 784               | 117.00            | 91,728         |
|                          | 1996      | 29,000       | 26             | 754               | 85.80             | 64,691         |
|                          | 1997      | 30,100       | 27             | 813               | 115.00            | 93,224         |
|                          | 1998      | 32,200       | 26             | 837               | 138.00            | 115,270        |
|                          | 1999      | 33,800       | 33             | 1,115             | 142.00            | 158,330        |
|                          | 2000      | 37,000       | 32             | 1,184             | 122.00            | 144,448        |
|                          | 2001      | 35,000       | 30             | 1,050             | 156.00            | 163,800        |
|                          | 2002      | 34,000       | 30             | 1,020             | 114.00            | 116,280        |
| Beans, Fresh Market Snap | 1993      | 7,300        | 80             | 584               | 49.90             | 29,142         |
|                          | 1994      | 7,500        | 70             | 525               | 57.20             | 30,030         |
|                          | 1995      | 7,000        | 100            | 700               | 50.20             | 35,140         |
|                          | 1996      | 7,800        | 90             | 702               | 47.80             | 33,566         |
|                          | 1997      | 4,500        | 100            | 450               | 52.00             | 23,400         |
|                          | 1998      | 4,700        | 95             | 447               | 67.80             | 30,307         |
|                          | 1999      | 5,100        | 95             | 485               | 58.90             | 28,567         |
|                          | 2000      | 5,500        | 100            | 550               | 56.00             | 30,800         |
|                          | 2001      | 5,400        | 80             | 432               | 64.40             | 27,821         |
|                          | 2002      | 6,500        | 80             | 520               | 62.30             | 32,396         |
| Broccoli                 | 1993      | 105,000      | 105            | 11,025            | 25.50             | 280,875        |
|                          | 1994      | 118,000      | 120            | 14,160            | 27.30             | 387,160        |
|                          | 1995      | 115,000      | 125            | 14,375            | 27.40             | 394,272        |
|                          | 1996      | 122,000      | 120            | 14,640            | 26.60             | 388,753        |
|                          | 1997      | 119,000      | 130            | 15,470            | 27.90             | 431,301        |
|                          | 1998      | 121,000      | 130            | 15,730            | 28.90             | 454,383        |
|                          | 1999      | 130,000      | 140            | 18,200            | 23.80             | 432,973        |
|                          | 2000      | 133,000      | 140            | 18,620            | 30.90             | 575,349        |
|                          | 2001      | 122,000      | 140            | 17,080            | 25.70             | 439,387        |
|                          | 2002      | 115,000      | 140            | 16,100            | 30.30             | 488,442        |
| Brussels Sprouts 2/      | 1993      | 5,000        | 160            | 800               | 30.90             | 24,756         |
|                          | 1994      | 3,500        | 180            | 630               | 24.60             | 15,471         |
|                          | 1995      | 3,400        | 165            | 561               | 25.70             | 14,390         |
|                          | 1996      | 3,800        | 180            | 684               | 29.40             | 20,120         |
|                          | 1997      | 3,200        | 160            | 512               | 41.40             | 21,180         |
|                          | 1998      | 3,200        | 160            | 512               | 41.00             | 20,985         |
|                          | 1999      | 3,200        | 180            | 576               | 37.20             | 21,419         |
|                          | 2000      | 2,600        | 180            | 468               | 34.40             | 16,115         |
|                          | 2001      | 2,200        | 180            | 396               | 36.50             | 14,471         |
|                          | 2002      | ---          | ---            | ---               | ---               | ---            |



### Vegetable and Melon Acreage, Production and Value, 1993-2002

| Crop                  | Crop<br>Year | Harvested | Yield Per Acre | Production | Value Per Cwt. 1/ | Total Value |
|-----------------------|--------------|-----------|----------------|------------|-------------------|-------------|
|                       |              | Acres     | Cwt.           | 1,000 Cwt. | Dollars           | \$1,000     |
| Cabbage, Fresh Market | 1993         | 12,000    | 360            | 4,320      | 13.70             | 59,184      |
|                       | 1994         | 10,000    | 385            | 3,850      | 13.40             | 51,590      |
|                       | 1995         | 10,000    | 370            | 3,700      | 15.50             | 57,350      |
|                       | 1996         | 10,000    | 350            | 3,500      | 12.60             | 44,100      |
|                       | 1997         | 13,800    | 340            | 4,692      | 14.90             | 69,911      |
|                       | 1998         | 14,000    | 330            | 4,620      | 16.50             | 76,230      |
|                       | 1999         | 12,500    | 320            | 4,000      | 13.40             | 53,600      |
|                       | 2000         | 13,000    | 370            | 4,810      | 13.10             | 63,011      |
|                       | 2001         | 12,000    | 380            | 4,560      | 13.80             | 62,928      |
|                       | 2002         | 12,500    | 380            | 4,750      | 14.00             | 66,500      |
| Carrots, Fresh Market | 1993         | 75,200    | 300            | 22,560     | 11.10             | 250,416     |
|                       | 1994         | 75,900    | 360            | 27,324     | 12.70             | 347,015     |
|                       | 1995         | 72,500    | 300            | 21,750     | 16.60             | 361,050     |
|                       | 1996         | 85,700    | 300            | 25,710     | 13.60             | 349,656     |
|                       | 1997         | 83,200    | 360            | 29,998     | 13.00             | 389,974     |
|                       | 1998         | 86,500    | 330            | 28,545     | 11.40             | 325,413     |
|                       | 1999         | 83,500    | 295            | 24,633     | 17.20             | 423,688     |
|                       | 2000         | 80,500    | 290            | 23,345     | 13.30             | 310,489     |
|                       | 2001         | 81,000    | 290            | 23,490     | 18.10             | 425,169     |
|                       | 2002         | 77,000    | 290            | 22,330     | 20.30             | 453,299     |
| Carrots, Processing   | 1993         | 6,800     | 294            | 2,000      | 4.85              | 9,700       |
|                       | 1994         | 4,100     | 618            | 2,532      | 3.81              | 9,635       |
|                       | 1995         | 5,500     | 462            | 2,542      | 3.64              | 9,254       |
|                       | 1996         | 4,300     | 670            | 2,880      | 3.02              | 8,698       |
|                       | 1997         | 2,700     | 641            | 1,730      | 3.28              | 5,666       |
|                       | 1998         | 4,500     | 628            | 2,826      | 3.35              | 9,453       |
|                       | 1999         | 4,400     | 623            | 2,739      | 3.61              | 9,877       |
|                       | 2000         | 4,900     | 600            | 2,940      | 4.07              | 11,966      |
|                       | 2001         | 3,300     | 586            | 1,934      | 4.52              | 8,750       |
|                       | 2002         | 2,100     | 574            | 1,205      | 5.43              | 6,539       |
| Carrots, All          | 1993         | 82,000    | 300            | 24,560     | 10.59             | 260,116     |
|                       | 1994         | 80,000    | 373            | 29,856     | 11.95             | 356,650     |
|                       | 1995         | 78,000    | 311            | 24,292     | 15.24             | 370,304     |
|                       | 1996         | 90,000    | 318            | 28,590     | 12.53             | 358,354     |
|                       | 1997         | 85,900    | 369            | 31,728     | 12.47             | 395,640     |
|                       | 1998         | 91,000    | 345            | 31,371     | 10.67             | 334,866     |
|                       | 1999         | 87,900    | 311            | 27,372     | 15.84             | 433,565     |
|                       | 2000         | 85,400    | 308            | 26,285     | 12.27             | 322,455     |
|                       | 2001         | 84,300    | 302            | 25,424     | 17.07             | 433,919     |
|                       | 2002         | 79,100    | 298            | 23,535     | 19.54             | 459,838     |
| Cauliflower           | 1993         | 48,000    | 136            | 6,540      | 29.70             | 194,545     |
|                       | 1994         | 47,000    | 140            | 6,611      | 28.40             | 187,654     |
|                       | 1995         | 43,000    | 137            | 5,875      | 33.70             | 198,275     |
|                       | 1996         | 41,500    | 152            | 6,310      | 32.30             | 203,499     |
|                       | 1997         | 37,500    | 154            | 5,790      | 31.40             | 181,829     |
|                       | 1998         | 39,000    | 150            | 5,850      | 31.20             | 182,650     |
|                       | 1999         | 41,000    | 155            | 6,355      | 27.30             | 173,725     |
|                       | 2000         | 38,500    | 180            | 6,930      | 30.50             | 211,087     |
|                       | 2001         | 38,500    | 155            | 5,968      | 28.10             | 167,504     |
|                       | 2002         | 37,000    | 150            | 5,550      | 30.20             | 167,491     |

# Vegetable and Melon Acreage, Production and Value, 1993-2002

| Crop                     | Crop Year | Harvested    | Yield Per Acre | Production        | Value Per Cwt. 1/ | Total Value    |
|--------------------------|-----------|--------------|----------------|-------------------|-------------------|----------------|
|                          |           | <i>Acres</i> | <i>Cwt.</i>    | <i>1,000 Cwt.</i> | <i>Dollars</i>    | <i>\$1,000</i> |
| Celery                   | 1993      | 24,000       | 680            | 16,320            | 14.70             | 240,081        |
|                          | 1994      | 24,500       | 690            | 16,905            | 11.80             | 198,695        |
|                          | 1995      | 24,000       | 685            | 16,440            | 16.50             | 272,037        |
|                          | 1996      | 24,500       | 700            | 17,150            | 10.60             | 181,606        |
|                          | 1997      | 24,000       | 695            | 16,680            | 14.80             | 247,371        |
|                          | 1998      | 24,500       | 680            | 16,666            | 12.20             | 203,126        |
|                          | 1999      | 25,000       | 700            | 17,500            | 12.00             | 209,940        |
|                          | 2000      | 24,000       | 720            | 17,280            | 18.80             | 324,850        |
|                          | 2001      | 26,500       | 695            | 17,723            | 14.40             | 255,841        |
|                          | 2002      | 25,500       | 710            | 17,750            | 12.80             | 227,130        |
| Corn, Fresh Market Sweet | 1993      | 20,000       | 140            | 2,800             | 17.80             | 49,840         |
|                          | 1994      | 21,600       | 140            | 3,024             | 18.30             | 55,339         |
|                          | 1995      | 22,300       | 150            | 3,345             | 18.70             | 62,552         |
|                          | 1996      | 24,100       | 155            | 3,736             | 17.60             | 65,754         |
|                          | 1997      | 27,000       | 145            | 3,915             | 17.20             | 67,338         |
|                          | 1998      | 32,000       | 175            | 5,600             | 15.80             | 88,480         |
|                          | 1999      | 26,000       | 165            | 4,290             | 17.60             | 75,504         |
|                          | 2000      | 24,000       | 165            | 3,960             | 16.70             | 66,132         |
|                          | 2001      | 22,000       | 170            | 3,740             | 22.30             | 83,402         |
|                          | 2002      | 24,000       | 170            | 4,080             | 24.00             | 97,920         |
| Cucumbers, Fresh Market  | 1993      | 5,600        | 250            | 1,400             | 27.10             | 37,940         |
|                          | 1994      | 5,000        | 250            | 1,250             | 24.90             | 31,125         |
|                          | 1995      | 5,200        | 315            | 1,638             | 25.90             | 42,424         |
|                          | 1996      | 6,000        | 330            | 1,980             | 28.20             | 55,836         |
|                          | 1997      | 6,300        | 315            | 1,985             | 24.70             | 49,030         |
|                          | 1998      | 6,000        | 320            | 1,920             | 30.90             | 59,328         |
|                          | 1999      | 6,500        | 310            | 2,015             | 26.80             | 54,002         |
|                          | 2000      | 4,500        | 285            | 1,283             | 28.50             | 36,566         |
|                          | 2001      | 4,700        | 240            | 1,128             | 30.00             | 33,840         |
|                          | 2002      | 4,300        | 240            | 1,032             | 28.60             | 29,515         |
| Escarole and Endive 2/   | 2000      | 2,400        | 160            | 384               | 36.70             | 14,093         |
|                          | 2001      | 2,400        | 150            | 360               | 35.50             | 12,780         |
|                          | 2002      | ---          | ---            | ---               | ---               | ---            |
| Eggplant 2/              | 2000      | 1,600        | 205            | 328               | 35.00             | 9,020          |
|                          | 2001      | 1,400        | 235            | 329               | 24.50             | 8,061          |
|                          | 2002      | ---          | ---            | ---               | ---               | ---            |
| Garlic                   | 1993      | 26,000       | 160            | 4,160             | 31.80             | 132,470        |
|                          | 1994      | 27,000       | 170            | 4,590             | 40.10             | 183,852        |
|                          | 1995      | 28,500       | 165            | 4,703             | 31.40             | 147,714        |
|                          | 1996      | 35,000       | 175            | 6,125             | 32.10             | 196,333        |
|                          | 1997      | 33,000       | 170            | 5,610             | 47.90             | 268,776        |
|                          | 1998      | 38,000       | 145            | 5,510             | 37.70             | 207,511        |
|                          | 1999      | 40,000       | 185            | 7,400             | 29.60             | 219,076        |
|                          | 2000      | 29,000       | 165            | 4,785             | 29.40             | 140,447        |
|                          | 2001      | 30,000       | 170            | 5,100             | 31.50             | 160,420        |
|                          | 2002      | 27,000       | 175            | 4,725             | 29.20             | 138,146        |
| Greens, Collard 2/       | 2000      | 700          | 190            | 133               | 36.00             | 4,788          |
|                          | 2001      | 700          | 170            | 119               | 38.80             | 4,617          |
|                          | 2002      | ---          | ---            | ---               | ---               | ---            |

# Vegetable and Melon Acreage, Production and Value, 1993-2002

| Crop               | Crop Year | Harvested    | Yield Per Acre | Production        | Value Per Cwt. 1/ | Total Value    |
|--------------------|-----------|--------------|----------------|-------------------|-------------------|----------------|
|                    |           | <i>Acres</i> | <i>Cwt.</i>    | <i>1,000 Cwt.</i> | <i>Dollars</i>    | <i>\$1,000</i> |
| Greens, Kale 2/    | 2000      | 3,000        | 215            | 645               | 33.20             | 21,414         |
|                    | 2001      | 2,800        | 190            | 532               | 28.70             | 15,268         |
|                    | 2002      | ---          | ---            | ---               | ---               | ---            |
|                    |           |              |                |                   |                   |                |
| Greens, Mustard 2/ | 2000      | 3,200        | 170            | 544               | 36.80             | 20,019         |
|                    | 2001      | 3,400        | 140            | 476               | 36.90             | 17,564         |
|                    | 2002      | ---          | ---            | ---               | ---               | ---            |
|                    |           |              |                |                   |                   |                |
| Lettuce, Head      | 1993      | 141,000      | 360            | 50,760            | 16.50             | 837,540        |
|                    | 1994      | 153,000      | 330            | 50,490            | 14.60             | 737,154        |
|                    | 1995      | 144,000      | 295            | 42,480            | 25.00             | 1,062,000      |
|                    | 1996      | 150,500      | 290            | 43,645            | 15.40             | 672,133        |
|                    | 1997      | 141,000      | 350            | 49,350            | 19.40             | 957,390        |
|                    | 1998      | 135,000      | 315            | 42,525            | 16.30             | 693,158        |
|                    | 1999      | 140,000      | 380            | 53,200            | 13.70             | 728,840        |
|                    | 2000      | 130,000      | 390            | 50,700            | 18.80             | 953,160        |
|                    | 2001      | 128,000      | 380            | 48,640            | 18.50             | 899,840        |
|                    | 2002      | 129,000      | 375            | 48,375            | 15.20             | 735,300        |
|                    |           |              |                |                   |                   |                |
|                    |           |              |                |                   |                   |                |
| Lettuce, Leaf      | 1993      | 37,000       | 205            | 7,585             | 27.70             | 210,105        |
|                    | 1994      | 35,000       | 225            | 7,875             | 28.10             | 221,288        |
|                    | 1995      | 37,000       | 210            | 7,770             | 31.90             | 247,863        |
|                    | 1996      | 36,000       | 210            | 7,560             | 25.10             | 189,756        |
|                    | 1997      | 42,000       | 205            | 8,660             | 28.30             | 245,385        |
|                    | 1998      | 38,000       | 215            | 8,170             | 30.50             | 249,185        |
|                    | 1999      | 43,000       | 220            | 9,460             | 23.80             | 225,148        |
|                    | 2000      | 45,000       | 235            | 10,575            | 29.60             | 313,020        |
|                    | 2001      | 46,000       | 215            | 9,890             | 24.90             | 246,261        |
|                    | 2002      | 49,000       | 215            | 10,535            | 28.10             | 296,034        |
|                    |           |              |                |                   |                   |                |
|                    |           |              |                |                   |                   |                |
| Lettuce, Romaine   | 1993      | 19,000       | 280            | 5,320             | 18.60             | 98,952         |
|                    | 1994      | 24,000       | 280            | 6,720             | 21.40             | 143,808        |
|                    | 1995      | 23,000       | 280            | 6,440             | 24.40             | 157,136        |
|                    | 1996      | 23,500       | 275            | 6,463             | 18.60             | 120,212        |
|                    | 1997      | 25,000       | 280            | 7,000             | 19.20             | 134,400        |
|                    | 1998      | 26,000       | 280            | 7,280             | 21.60             | 157,248        |
|                    | 1999      | 31,000       | 315            | 9,765             | 18.00             | 175,770        |
|                    | 2000      | 36,000       | 315            | 11,340            | 20.10             | 227,934        |
|                    | 2001      | 40,500       | 280            | 11,340            | 17.50             | 198,450        |
|                    | 2002      | 42,000       | 295            | 12,390            | 19.90             | 246,561        |
|                    |           |              |                |                   |                   |                |
|                    |           |              |                |                   |                   |                |
| Lettuce, All       | 1993      | 197,000      | 323            | 63,665            | 18.00             | 1,146,597      |
|                    | 1994      | 212,000      | 307            | 65,085            | 16.90             | 1,102,250      |
|                    | 1995      | 204,000      | 278            | 56,690            | 25.90             | 1,466,999      |
|                    | 1996      | 210,000      | 275            | 57,668            | 17.00             | 982,101        |
|                    | 1997      | 208,000      | 313            | 65,010            | 20.60             | 1,337,175      |
|                    | 1998      | 199,000      | 291            | 57,975            | 19.00             | 1,099,591      |
|                    | 1999      | 214,000      | 338            | 72,425            | 15.60             | 1,129,758      |
|                    | 2000      | 211,000      | 344            | 72,615            | 20.60             | 1,494,114      |
|                    | 2001      | 214,500      | 326            | 69,870            | 19.20             | 1,344,551      |
|                    | 2002      | 220,000      | 324            | 71,300            | 17.90             | 1,277,895      |
|                    |           |              |                |                   |                   |                |
|                    |           |              |                |                   |                   |                |

### Vegetable and Melon Acreage, Production and Value, 1993-2002

| Crop                | Crop Year | Harvested    | Yield Per Acre | Production        | Value Per Cwt. 1/ | Total Value    |
|---------------------|-----------|--------------|----------------|-------------------|-------------------|----------------|
|                     |           | <i>Acres</i> | <i>Cwt.</i>    | <i>1,000 Cwt.</i> | <i>Dollars</i>    | <i>\$1,000</i> |
| Melons, Cantaloupe  | 1993      | 65,000       | 190            | 12,350            | 15.30             | 188,955        |
|                     | 1994      | 59,300       | 190            | 11,267            | 15.90             | 179,145        |
|                     | 1995      | 59,300       | 200            | 11,860            | 17.30             | 205,178        |
|                     | 1996      | 59,000       | 220            | 12,980            | 17.90             | 232,342        |
|                     | 1997      | 62,300       | 210            | 13,083            | 17.70             | 231,569        |
|                     | 1998      | 58,000       | 220            | 12,760            | 17.10             | 218,196        |
|                     | 1999      | 61,000       | 210            | 12,810            | 17.30             | 221,613        |
|                     | 2000      | 57,500       | 230            | 13,225            | 17.10             | 226,148        |
|                     | 2001      | 54,500       | 245            | 13,353            | 18.90             | 252,372        |
|                     | 2002      | 54,900       | 245            | 13,451            | 16.60             | 223,287        |
| Melons, Honeydew    | 1993      | 16,500       | 160            | 2,640             | 16.70             | 44,088         |
|                     | 1994      | 20,500       | 165            | 3,383             | 16.10             | 54,466         |
|                     | 1995      | 18,100       | 160            | 2,896             | 18.70             | 54,155         |
|                     | 1996      | 20,300       | 170            | 3,451             | 16.50             | 56,942         |
|                     | 1997      | 20,500       | 180            | 3,690             | 18.50             | 68,265         |
|                     | 1998      | 19,000       | 190            | 3,610             | 19.30             | 69,673         |
|                     | 1999      | 20,500       | 180            | 3,690             | 21.10             | 77,859         |
|                     | 2000      | 20,000       | 185            | 3,700             | 18.60             | 68,820         |
|                     | 2001      | 20,000       | 185            | 3,700             | 19.70             | 72,890         |
|                     | 2002      | 20,400       | 185            | 3,774             | 16.80             | 63,403         |
| Melons, Watermelon  | 1993      | 16,000       | 420            | 6,720             | 8.00              | 54,029         |
|                     | 1994      | 16,700       | 430            | 7,181             | 9.90              | 71,164         |
|                     | 1995      | 16,800       | 380            | 6,364             | 14.30             | 91,291         |
|                     | 1996      | 17,100       | 440            | 7,524             | 10.50             | 79,002         |
|                     | 1997      | 17,000       | 460            | 7,820             | 10.90             | 85,283         |
|                     | 1998      | 15,000       | 450            | 6,750             | 12.30             | 83,025         |
|                     | 1999      | 14,700       | 430            | 6,321             | 9.80              | 61,946         |
|                     | 2000      | 12,300       | 535            | 6,581             | 11.70             | 76,998         |
|                     | 2001      | 11,800       | 530            | 6,254             | 10.90             | 68,169         |
|                     | 2002      | 11,800       | 510            | 6,018             | 12.70             | 76,429         |
| Mushrooms, Agaricus | 1993      | 528          | 2,434          | 1,285             | 101.00            | 129,866        |
|                     | 1994      | 501          | 2,475          | 1,240             | 106.00            | 130,911        |
|                     | 1995      | 503          | 2,682          | 1,349             | 104.00            | 140,796        |
|                     | 1996      | 514          | 2,549          | 1,310             | 109.00            | 142,642        |
|                     | 1997      | 529          | 2,461          | 1,302             | 120.00            | 155,554        |
|                     | 1998      | 563          | 2,378          | 1,338             | 119.00            | 158,638        |
|                     | 1999      | 548          | 2,412          | 1,322             | 122.00            | 161,612        |
|                     | 2000      | 537          | 2,408          | 1,293             | 126.00            | 162,279        |
|                     | 2001      | 526          | 2,456          | 1,292             | 126.00            | 162,988        |
|                     | 2002      | 523          | 2,453          | 1,283             | 133.00            | 170,159        |
| Onions, Spring      | 1993      | 9,500        | 430            | 4,085             | 18.00             | 73,530         |
|                     | 1994      | 8,800        | 435            | 3,828             | 8.00              | 30,701         |
|                     | 1995      | 8,700        | 440            | 3,828             | 14.00             | 53,592         |
|                     | 1996      | 9,600        | 385            | 3,696             | 9.80              | 36,221         |
|                     | 1997      | 9,600        | 450            | 4,320             | 14.30             | 61,776         |
|                     | 1998      | 9,100        | 445            | 4,050             | 14.10             | 57,105         |
|                     | 1999      | 7,300        | 440            | 3,212             | 11.90             | 38,223         |
|                     | 2000      | 7,100        | 435            | 3,089             | 10.60             | 32,743         |
|                     | 2001      | 6,200        | 430            | 2,666             | 13.50             | 35,991         |
|                     | 2002      | 6,200        | 460            | 2,852             | 14.20             | 40,498         |

# Vegetable and Melon Acreage, Production and Value, 1993-2002

| Crop                          | Crop<br>Year | Harvested | Yield Per Acre | Production | Value Per Cwt. 1/ | Total Value |
|-------------------------------|--------------|-----------|----------------|------------|-------------------|-------------|
|                               |              | Acres     | Cwt.           | 1,000 Cwt. | Dollars           | \$1,000     |
| Onions, Summer Storage 3/ 4/  | 1993         | 36,500    | 395            | 14,418     | 8.00              | 113,115     |
|                               | 1994         | 33,200    | 410            | 13,612     | 6.30              | 83,915      |
|                               | 1995         | 32,100    | 415            | 13,322     | 7.20              | 93,649      |
|                               | 1996         | 33,500    | 430            | 14,405     | 7.70              | 108,860     |
|                               | 1997         | 31,300    | 440            | 13,772     | 7.84              | 105,793     |
|                               | 1998         | 37,700    | 415            | 15,646     | 9.71              | 149,439     |
|                               | 1999         | 39,000    | 435            | 16,965     | 7.53              | 125,936     |
|                               | 2000         | 36,300    | 445            | 16,154     | 7.98              | 126,875     |
|                               | 2001         | 29,800    | 405            | 12,069     | 7.26              | 85,748      |
|                               | 2002         | 30,400    | 405            | 12,312     | 7.12              | 85,847      |
| Onions, Summer Non-Storage 5/ | 2000         | 6,200     | 395            | 2,449      | 12.00             | 29,388      |
|                               | 2001         | 7,000     | 450            | 3,150      | 13.50             | 42,525      |
|                               | 2002         | 7,200     | 470            | 3,384      | 12.90             | 43,654      |
| Onions, Processed 6/          | 1998         | ---       | ---            | 9,327      | 6.55              | 61,092      |
|                               | 1999         | ---       | ---            | 12,550     | 6.55              | 82,203      |
|                               | 2000         | ---       | ---            | 11,304     | 6.30              | 71,215      |
|                               | 2001         | ---       | ---            | 9,125      | 5.50              | 50,188      |
|                               | 2002         | ---       | ---            | 9,100      | 5.30              | 48,230      |
| Onions, All 3/                | 1993         | 46,000    | 402            | 18,503     | 10.30             | 186,645     |
|                               | 1994         | 42,000    | 415            | 17,440     | 6.67              | 114,616     |
|                               | 1995         | 40,800    | 420            | 17,150     | 8.72              | 147,241     |
|                               | 1996         | 43,100    | 420            | 18,101     | 8.15              | 145,081     |
|                               | 1997         | 40,900    | 442            | 18,092     | 9.41              | 167,569     |
|                               | 1998         | 46,800    | 421            | 19,696     | 10.60             | 206,544     |
|                               | 1999         | 46,300    | 436            | 20,177     | 8.24              | 164,159     |
|                               | 2000         | 49,600    | 437            | 21,692     | 8.81              | 189,006     |
|                               | 2001         | 43,000    | 416            | 17,885     | 9.31              | 164,264     |
|                               | 2002         | 43,800    | 423            | 18,548     | 9.29              | 169,999     |
| Peppers, Bell                 | 1993         | 21,100    | 300            | 6,330      | 27.50             | 174,251     |
|                               | 1994         | 21,500    | 290            | 6,235      | 25.90             | 161,190     |
|                               | 1995         | 24,000    | 290            | 6,960      | 27.10             | 188,523     |
|                               | 1996         | 25,500    | 300            | 7,650      | 22.70             | 173,506     |
|                               | 1997         | 21,000    | 300            | 6,300      | 24.60             | 155,040     |
|                               | 1998         | 22,000    | 285            | 6,270      | 27.20             | 170,374     |
|                               | 1999         | 22,500    | 330            | 7,425      | 29.80             | 220,997     |
|                               | 2000         | 21,000    | 300            | 6,300      | 27.30             | 171,788     |
|                               | 2001         | 22,000    | 325            | 7,150      | 25.50             | 182,343     |
|                               | 2002         | 21,000    | 330            | 6,930      | 28.60             | 197,987     |
| Peppers, Chili 5/             | 2000         | 3,000     | 230            | 690        | 40.80             | 28,165      |
|                               | 2001         | 2,600     | 225            | 585        | 30.30             | 17,697      |
|                               | 2002         | 2,800     | 230            | 644        | 27.80             | 17,914      |
| Pumpkins 5/                   | 2000         | 5,900     | 305            | 1,800      | 10.60             | 19,080      |
|                               | 2001         | 6,100     | 240            | 1,464      | 11.20             | 16,397      |
|                               | 2002         | 6,000     | 250            | 1,500      | 10.90             | 16,350      |
| Radishes 2/                   | 2000         | 1,200     | 250            | 300        | 26.00             | 7,800       |
|                               | 2001         | 1,100     | 230            | 253        | 24.50             | 6,199       |
|                               | 2002         | ---       | ---            | ---        | ---               | ---         |

# Vegetable and Melon Acreage, Production and Value, 1993-2002

| Crop                                                                | Crop Year | Harvested    | Yield Per Acre | Production        | Value Per Cwt. 1/ | Total Value    |
|---------------------------------------------------------------------|-----------|--------------|----------------|-------------------|-------------------|----------------|
|                                                                     |           | <i>Acres</i> | <i>Cwt.</i>    | <i>1,000 Cwt.</i> | <i>Dollars</i>    | <i>\$1,000</i> |
| Spinach, Fresh Market                                               | 1993      | 5,000        | 215            | 1,075             | 31.00             | 33,325         |
|                                                                     | 1994      | 7,100        | 205            | 1,456             | 30.80             | 44,845         |
|                                                                     | 1995      | 8,400        | 160            | 1,340             | 34.50             | 46,230         |
|                                                                     | 1996      | 9,000        | 150            | 1,350             | 30.90             | 41,715         |
|                                                                     | 1997      | 15,200       | 175            | 2,660             | 31.20             | 82,992         |
|                                                                     | 1998      | 15,000       | 160            | 2,400             | 35.40             | 84,960         |
|                                                                     | 1999      | 17,000       | 150            | 2,550             | 31.40             | 80,070         |
|                                                                     | 2000      | 19,000       | 180            | 3,420             | 30.70             | 104,994        |
|                                                                     | 2001      | 17,000       | 155            | 2,635             | 32.60             | 85,901         |
|                                                                     | 2002      | 20,000       | 160            | 3,200             | 35.20             | 112,640        |
| Squash 5/                                                           | 2000      | 8,300        | 180            | 1,494             | 20.00             | 29,951         |
|                                                                     | 2001      | 8,000        | 190            | 1,520             | 18.50             | 28,060         |
|                                                                     | 2002      | 8,300        | 190            | 1,577             | 21.00             | 33,049         |
| Tomatoes, Fresh Market                                              | 1993      | 37,500       | 300            | 11,250            | 26.30             | 295,875        |
|                                                                     | 1994      | 40,000       | 275            | 11,000            | 24.80             | 272,800        |
|                                                                     | 1995      | 38,000       | 270            | 10,260            | 18.70             | 191,862        |
|                                                                     | 1996      | 37,400       | 280            | 10,472            | 24.80             | 259,706        |
|                                                                     | 1997      | 34,000       | 285            | 9,860             | 26.50             | 261,630        |
|                                                                     | 1998      | 41,000       | 240            | 9,840             | 33.10             | 325,704        |
|                                                                     | 1999      | 44,000       | 260            | 11,440            | 22.30             | 255,112        |
|                                                                     | 2000      | 40,000       | 290            | 11,600            | 29.80             | 345,680        |
|                                                                     | 2001      | 38,000       | 270            | 10,260            | 24.90             | 255,474        |
|                                                                     | 2002      | 38,500       | 300            | 11,550            | 25.40             | 293,370        |
| Miscellaneous Vegetables and Melons, Fresh Market and Processing 7/ | 1993      | 164,000      | ---            | 58,420            | ---               | 656,547        |
|                                                                     | 1994      | 208,000      | ---            | 78,500            | ---               | 827,313        |
|                                                                     | 1995      | 184,000      | ---            | 67,200            | ---               | 825,877        |
|                                                                     | 1996      | 238,000      | ---            | 86,960            | ---               | 953,535        |
|                                                                     | 1997      | 166,000      | ---            | 62,400            | ---               | 796,332        |
|                                                                     | 1998      | 210,000      | ---            | 88,220            | ---               | 938,160        |
|                                                                     | 1999      | 211,000      | ---            | 101,180           | ---               | 927,630        |
|                                                                     | 2000      | 180,000      | ---            | 102,900           | ---               | 878,201        |
|                                                                     | 2001      | 199,000      | ---            | 97,880            | ---               | 918,918        |
|                                                                     | 2002      | 204,000      | ---            | 111,440           | ---               | 985,480        |

1/ The processed price is based on equivalent returns at the processing plant door. The fresh market price is on a packed and loaded basis, F.O.B. shipping point.

2/ Program discontinued in 2002.

3/ Onion production includes quantity harvested, but not marketed because of loss during storage (shrinkage): 1993 -- 346,000 cwt., 1994 and 1995 -- 266,000 cwt., 1996 -- 292,000 cwt., 1997 -- 278,000 cwt., 1998 to 2002 -- 250,000 cwt. Storage loss amounts are excluded when computing total value.

4/ Includes fresh and processed.

5/ Program initiated in 2000.

6/ Program initiated in 1998.

7/ Miscellaneous vegetables and melons include: Green lima beans for processing, oriental vegetables, green peas, etc. The crops added in 2000 are excluded from the 2000 to present miscellaneous totals.

**Processing Vegetable Acreage, Production and Value, 1993-2002**

| Processing Vegetable Acreage, Production and Value, 1993-2002 |           |              |                |             |                      |                       |                |
|---------------------------------------------------------------|-----------|--------------|----------------|-------------|----------------------|-----------------------|----------------|
| Crop                                                          | Crop Year | Harvested    | Yield Per Acre | Production  | Value Per Ton        |                       | Total Value    |
|                                                               |           |              |                |             | First Delivery Point | Processing Plant Door |                |
|                                                               |           | <i>Acres</i> | <i>Tons</i>    | <i>Tons</i> | <i>Dollars</i>       | <i>Dollars</i>        | <i>\$1,000</i> |
| Tomatoes, Processing                                          |           |              |                |             |                      |                       |                |
|                                                               | 1993      | 274,000      | 32.67          | 8,951,580   | 48.30                | 59.10                 | 529,038        |
|                                                               | 1994      | 311,000      | 34.55          | 10,745,560  | 50.90                | 61.00                 | 655,479        |
|                                                               | 1995      | 317,000      | 33.46          | 10,605,787  | 54.00                | 62.30                 | 660,740        |
|                                                               | 1996      | 313,000      | 34.05          | 10,658,741  | 53.50                | 61.10                 | 651,249        |
|                                                               | 1997      | 260,000      | 35.93          | 9,342,309   | 50.85                | 59.50                 | 555,867        |
|                                                               | 1998      | 280,000      | 31.76          | 8,892,800   | 54.65                | 64.20                 | 570,918        |
|                                                               | 1999      | 329,000      | 37.20          | 12,239,300  | 59.85                | 70.50                 | 862,871        |
|                                                               | 2000      | 271,000      | 37.96          | 10,286,500  | 50.75                | 58.60                 | 602,789        |
|                                                               | 2001      | 254,000      | 34.02          | 8,640,140   | 49.40                | 57.50                 | 496,808        |
|                                                               | 2002      | 291,000      | 37.99          | 11,056,000  | 50.30                | 57.20                 | 632,403        |
| Cucumbers, Pickles 1/                                         |           |              |                |             |                      |                       |                |
|                                                               | 1993      | 4,200        | 10.24          | 43,010      | ---                  | 192.00                | 8,258          |
|                                                               | 1994      | 4,900        | 9.26           | 45,370      | ---                  | 183.00                | 8,303          |
|                                                               | 1995      | 5,200        | 8.10           | 42,120      | ---                  | 383.00                | 16,132         |
|                                                               | 1996      | 6,200        | 7.00           | 43,400      | ---                  | 370.00                | 16,058         |
|                                                               | 1997      | 4,200        | 7.19           | 30,200      | ---                  | 296.00                | 8,939          |
|                                                               | 1998      | 4,500        | 6.56           | 29,520      | ---                  | 235.00                | 6,937          |
|                                                               | 1999      | ---          | ---            | ---         | ---                  | ---                   | ---            |
|                                                               | 2000      | ---          | ---            | ---         | ---                  | ---                   | ---            |
|                                                               | 2001      | ---          | ---            | ---         | ---                  | ---                   | ---            |
|                                                               | 2002      | ---          | ---            | ---         | ---                  | ---                   | ---            |

1/ Data for 1999-02 not published to avoid disclosure of individual operations.

**California Processing Tomatoes by County, 2002 Crop**

| County            | Contracted and Open Market |              |                |               |
|-------------------|----------------------------|--------------|----------------|---------------|
|                   | Planted                    | Harvested    | Yield Per Acre | Production 1/ |
|                   | <i>Acres</i>               | <i>Acres</i> | <i>Tons</i>    | <i>Tons</i>   |
| Colusa            | 19,000                     | 18,700       | 40.84          | 763,800       |
| Fresno            | 107,800                    | 106,900      | 39.29          | 4,200,000     |
| Glenn             | 1,000                      | 1,000        | 34.30          | 34,300        |
| Kings             | 14,000                     | 13,400       | 37.87          | 507,400       |
| Merced            | 19,200                     | 18,200       | 35.91          | 653,500       |
| Sacramento        | 3,900                      | 3,900        | 44.62          | 174,000       |
| San Joaquin       | 32,700                     | 32,600       | 36.99          | 1,206,000     |
| Solano            | 12,600                     | 12,600       | 37.45          | 471,900       |
| Stanislaus        | 16,700                     | 16,600       | 36.45          | 605,000       |
| Sutter            | 9,400                      | 9,100        | 36.89          | 335,700       |
| Yolo              | 41,800                     | 41,600       | 36.18          | 1,505,000     |
| Other Counties 2/ | 17,900                     | 16,400       | 36.55          | 599,400       |
| Total             | 296,000                    | 291,000      | 37.99          | 11,056,000    |

1/ On the basis of PAID FOR TONNAGE purchased from growers as reported by processors, dockage not included.

2/ To avoid disclosure of individual operations, OTHER COUNTIES includes: Contra Costa, Imperial, Kern, Madera, San Benito, Santa Clara, and Tulare.

**Vegetable and Melon Monthly Average Prices Received, 1997-2002 1/**

| Crop               | Crop Year | Jan.                    | Feb.   | Mar.   | Apr.   | May    | June   | July   | Aug.   | Sept.  | Oct.   | Nov.   | Dec.  |
|--------------------|-----------|-------------------------|--------|--------|--------|--------|--------|--------|--------|--------|--------|--------|-------|
|                    |           | <i>Dollars Per Cwt.</i> |        |        |        |        |        |        |        |        |        |        |       |
| Asparagus          | 1997      | 161.00                  | 140.00 | 116.00 | 109.00 | 92.40  | 154.00 | ---    | ---    | ---    | ---    | ---    | ---   |
|                    | 1998      | 179.00                  | 158.00 | 144.00 | 134.00 | 123.00 | 164.00 | 234.00 | 211.00 | 199.00 | 152.00 | 148.00 | ---   |
|                    | 1999      | 141.00                  | 119.00 | 178.00 | 128.00 | 123.00 | 158.00 | 214.00 | ---    | ---    | ---    | ---    | ---   |
|                    | 2000      | 147.00                  | 99.70  | 98.60  | 139.00 | 134.00 | 172.00 | 206.00 | 205.00 | ---    | ---    | ---    | ---   |
|                    | 2001      | 219.00                  | 256.00 | 147.00 | 150.00 | 133.00 | 177.00 | 176.00 | 145.00 | ---    | 137.00 | 129.00 | ---   |
|                    | 2002      | 218.00                  | 162.00 | 119.00 | 99.80  | 119.00 | 129.00 | 146.00 | ---    | ---    | ---    | ---    | ---   |
| Broccoli           | 1997      | 36.80                   | 27.80  | 25.90  | 24.20  | 23.10  | 30.30  | 27.50  | 23.30  | 31.20  | 40.70  | 27.00  | 30.20 |
|                    | 1998      | 33.80                   | 26.80  | 30.70  | 40.70  | 27.10  | 29.60  | 23.30  | 27.60  | 29.20  | 32.80  | 25.90  | 24.00 |
|                    | 1999      | 27.70                   | 20.10  | 21.70  | 20.30  | 18.60  | 23.10  | 18.70  | 27.40  | 29.30  | 23.00  | 21.70  | 39.50 |
|                    | 2000      | 22.50                   | 20.30  | 25.90  | 23.30  | 44.30  | 30.00  | 31.50  | 25.20  | 27.70  | 34.10  | 56.00  | 34.40 |
|                    | 2001      | 22.80                   | 32.30  | 23.80  | 27.00  | 25.50  | 27.00  | 23.60  | 27.10  | 22.90  | 24.20  | 21.60  | 55.10 |
|                    | 2002      | 53.40                   | 44.90  | 33.80  | 24.00  | 20.80  | 28.40  | 27.00  | 29.60  | 40.60  | 24.00  | 37.10  | 35.00 |
| Carrots            | 1997      | 14.90                   | 14.60  | 13.30  | 12.50  | 12.50  | 12.60  | 12.50  | 12.50  | 12.50  | 12.50  | 12.30  | 16.90 |
|                    | 1998      | 12.50                   | 12.70  | 12.70  | 12.00  | 11.40  | 11.50  | 10.60  | 10.40  | 10.20  | 10.60  | 11.30  | 11.00 |
|                    | 1999      | 16.10                   | 19.60  | 21.20  | 26.30  | 24.80  | 21.80  | 15.50  | 12.40  | 10.40  | 11.10  | 11.20  | 11.40 |
|                    | 2000      | 9.49                    | 11.60  | 11.80  | 12.30  | 13.40  | 14.60  | 15.40  | 14.20  | 14.30  | 14.80  | 15.30  | 15.60 |
|                    | 2001      | 15.90                   | 16.70  | 17.30  | 17.30  | 17.30  | 18.60  | 20.70  | 19.10  | 16.70  | 19.30  | 19.30  | 19.30 |
|                    | 2002      | 19.30                   | 19.70  | 21.10  | 21.20  | 21.20  | 21.50  | 20.50  | 20.20  | 20.20  | 19.90  | 19.60  | 19.50 |
| Cauliflower        | 1997      | 29.60                   | 33.80  | 32.60  | 27.70  | 20.70  | 31.20  | 38.90  | 22.90  | 34.50  | 49.30  | 27.60  | 28.90 |
|                    | 1998      | 35.10                   | 44.00  | 49.50  | 43.80  | 35.50  | 26.40  | 23.20  | 25.30  | 31.30  | 23.60  | 33.70  | 35.80 |
|                    | 1999      | 29.40                   | 29.40  | 37.60  | 45.80  | 23.40  | 25.50  | 19.30  | 24.80  | 20.30  | 20.00  | 34.50  | 54.30 |
|                    | 2000      | 22.90                   | 30.10  | 31.10  | 34.60  | 46.00  | 31.20  | 37.20  | 24.00  | 24.80  | 21.60  | 65.30  | 28.10 |
|                    | 2001      | 25.70                   | 35.20  | 22.80  | 47.30  | 26.30  | 37.40  | 24.80  | 24.70  | 23.50  | 21.60  | 21.50  | 56.10 |
|                    | 2002      | 59.50                   | 29.30  | 44.80  | 25.50  | 26.40  | 32.70  | 27.40  | 22.70  | 23.00  | 22.40  | 37.60  | 50.00 |
| Celery             | 1997      | 16.20                   | 16.20  | 12.30  | 10.50  | 15.40  | 9.89   | 19.00  | 16.40  | 14.00  | 13.40  | 18.40  | 19.10 |
|                    | 1998      | 11.20                   | 11.40  | 16.40  | 13.80  | 15.40  | 12.40  | 9.99   | 9.39   | 9.80   | 9.91   | 11.90  | 14.00 |
|                    | 1999      | 9.51                    | 8.47   | 8.35   | 10.20  | 12.80  | 18.30  | 13.80  | 9.81   | 9.77   | 8.48   | 12.80  | 17.20 |
|                    | 2000      | 19.20                   | 16.00  | 12.90  | 21.20  | 25.60  | 29.10  | 18.60  | 20.70  | 15.20  | 12.80  | 19.40  | 21.50 |
|                    | 2001      | 14.60                   | 15.00  | 15.80  | 19.10  | 24.00  | 33.70  | 13.10  | 8.15   | 8.04   | 7.46   | 8.64   | 9.62  |
|                    | 2002      | 10.10                   | 19.50  | 23.50  | 18.60  | 12.30  | 9.37   | 10.10  | 9.94   | 10.60  | 9.34   | 15.30  | 9.50  |
| Corn, Sweet        | 1997      | ---                     | ---    | ---    | 20.30  | 18.80  | 14.90  | 15.80  | 14.90  | 16.50  | 18.20  | 19.80  | 19.70 |
|                    | 1998      | ---                     | ---    | ---    | 33.60  | 20.00  | 14.80  | 12.60  | 11.00  | 15.20  | 26.20  | 27.30  | 17.30 |
|                    | 1999      | ---                     | ---    | ---    | ---    | 19.30  | 14.60  | 13.90  | 15.80  | 12.10  | 17.60  | 25.10  | ---   |
|                    | 2000      | ---                     | ---    | ---    | 21.90  | 14.30  | 18.80  | 15.50  | 19.20  | 26.90  | 16.30  | 20.80  | ---   |
|                    | 2001      | ---                     | ---    | ---    | 28.60  | 29.40  | 18.90  | 18.00  | 18.50  | 24.00  | 26.50  | 23.20  | 20.50 |
|                    | 2002      | ---                     | ---    | ---    | 29.60  | 25.00  | 19.40  | 19.00  | 15.70  | 19.50  | 17.40  | 19.40  | ---   |
| Melons, Cantaloupe | 1997      | ---                     | ---    | ---    | ---    | 20.20  | 16.50  | 14.70  | 15.20  | 21.50  | 24.90  | 21.80  | 18.50 |
|                    | 1998      | ---                     | ---    | ---    | ---    | 27.10  | 15.90  | 18.60  | 11.80  | 15.50  | 19.00  | 16.00  | ---   |
|                    | 1999      | ---                     | ---    | ---    | ---    | 23.90  | 15.90  | 12.80  | 13.50  | 15.90  | 17.70  | 19.40  | ---   |
|                    | 2000      | ---                     | ---    | ---    | ---    | 16.70  | 16.80  | 14.30  | 12.30  | 19.00  | 24.00  | 23.20  | 35.10 |
|                    | 2001      | ---                     | ---    | ---    | ---    | 27.30  | 13.20  | 14.50  | 17.20  | 13.50  | 16.50  | 20.00  | 23.70 |
|                    | 2002      | ---                     | ---    | ---    | ---    | 21.80  | 12.60  | 14.50  | 10.80  | 14.80  | 21.30  | 16.10  | ---   |
| Melons, Honeydew   | 1997      | ---                     | ---    | ---    | ---    | 28.50  | 21.00  | 14.40  | 12.60  | 22.70  | 31.90  | 21.20  | 18.00 |
|                    | 1998      | ---                     | ---    | ---    | ---    | 25.20  | 23.00  | 22.30  | 15.00  | 13.00  | 15.00  | 17.80  | 16.00 |
|                    | 1999      | ---                     | ---    | ---    | ---    | ---    | 22.60  | 16.60  | 16.00  | 20.20  | 28.50  | 20.70  | ---   |
|                    | 2000      | ---                     | ---    | ---    | ---    | 18.70  | 17.30  | 17.00  | 13.80  | 21.60  | 24.80  | 22.20  | ---   |
|                    | 2001      | ---                     | ---    | ---    | ---    | 30.70  | 19.00  | 18.30  | 17.90  | 16.10  | 14.80  | 20.40  | ---   |
|                    | 2002      | ---                     | ---    | ---    | ---    | 22.40  | 17.30  | 19.50  | 12.30  | 11.60  | 17.10  | 14.10  | ---   |



**Vegetable and Melon Monthly Average Prices Received, 1997-2002 1/**

| Crop           | Crop Year | Jan.                    | Feb.  | Mar.  | Apr.  | May   | June  | July  | Aug.  | Sept. | Oct.  | Nov.  | Dec.  |
|----------------|-----------|-------------------------|-------|-------|-------|-------|-------|-------|-------|-------|-------|-------|-------|
|                |           | <i>Dollars Per Cwt.</i> |       |       |       |       |       |       |       |       |       |       |       |
| Lettuce, Head  | 1997      | 15.20                   | 10.00 | 13.80 | 15.80 | 10.50 | 14.70 | 17.00 | 22.80 | 22.30 | 35.10 | 26.90 | 32.50 |
|                | 1998      | 19.40                   | 11.30 | 16.60 | 28.10 | 14.70 | 11.40 | 15.40 | 16.20 | 14.00 | 21.30 | 10.60 | 12.50 |
|                | 1999      | 11.10                   | 15.50 | 37.60 | 20.80 | 14.00 | 11.40 | 12.50 | 11.90 | 13.00 | 13.00 | 10.80 | 17.50 |
|                | 2000      | 15.00                   | 10.00 | 12.40 | 23.30 | 23.50 | 13.40 | 15.00 | 19.20 | 29.40 | 16.10 | 18.00 | 12.20 |
|                | 2001      | 14.50                   | 24.10 | 15.00 | 21.90 | 18.50 | 12.00 | 16.40 | 26.90 | 26.20 | 11.30 | 10.90 | 29.60 |
|                | 2002      | 29.00                   | 43.10 | 80.60 | 13.60 | 9.97  | 10.50 | 11.30 | 14.60 | 14.30 | 13.30 | 11.80 | 30.00 |
| Onions, Spring | 1997      | ---                     | ---   | ---   | 16.60 | 12.60 | 15.50 | 14.10 | ---   | ---   | ---   | ---   | ---   |
|                | 1998      | ---                     | ---   | ---   | 15.90 | 14.40 | 13.40 | 20.20 | ---   | ---   | ---   | ---   | ---   |
|                | 1999      | ---                     | ---   | ---   | 10.80 | 11.30 | 11.80 | 13.10 | ---   | ---   | ---   | ---   | ---   |
|                | 2000      | ---                     | ---   | ---   | 12.50 | 9.12  | 10.00 | 13.10 | ---   | ---   | ---   | ---   | ---   |
|                | 2001      | ---                     | ---   | ---   | 16.30 | 13.00 | 12.70 | 14.50 | ---   | ---   | ---   | ---   | ---   |
|                | 2002      | ---                     | ---   | ---   | 13.70 | 13.70 | 15.00 | 14.20 | ---   | ---   | ---   | ---   | ---   |
| Onions, Summer | 1997      | 19.60                   | 14.60 | ---   | ---   | ---   | ---   | 14.10 | 14.20 | 11.20 | 9.90  | 12.40 | 16.20 |
|                | 1998      | 17.00                   | 21.00 | 23.00 | ---   | ---   | ---   | 20.20 | 13.50 | 13.40 | 12.20 | 13.80 | 16.50 |
|                | 1999      | 17.50                   | 16.70 | 12.80 | ---   | ---   | ---   | 11.20 | 10.70 | 10.10 | 9.22  | 9.28  | ---   |
|                | 2000      | ---                     | ---   | ---   | ---   | ---   | ---   | 13.00 | 11.10 | 12.20 | 12.90 | 14.10 | 16.30 |
|                | 2001      | ---                     | ---   | ---   | ---   | ---   | ---   | 14.50 | 12.60 | 12.80 | 12.60 | 11.90 | 11.90 |
|                | 2002      | 11.60                   | 11.20 | 11.20 | ---   | ---   | ---   | 14.20 | 12.50 | 11.00 | 11.30 | 11.30 | 11.30 |
| Tomatoes       | 1997      | ---                     | ---   | ---   | ---   | 36.90 | 27.30 | 25.40 | 25.40 | 23.20 | 23.30 | 41.10 | ---   |
|                | 1998      | ---                     | ---   | ---   | ---   | 29.20 | 25.70 | 43.10 | 20.40 | 26.60 | 43.10 | 37.60 | ---   |
|                | 1999      | ---                     | ---   | ---   | ---   | 26.10 | 27.80 | 20.30 | 22.50 | 25.30 | 18.90 | 23.40 | 30.70 |
|                | 2000      | ---                     | ---   | ---   | ---   | 25.10 | 24.50 | 21.80 | 31.30 | 27.80 | 40.40 | 38.40 | 38.40 |
|                | 2001      | ---                     | ---   | ---   | ---   | 35.30 | 24.00 | 24.70 | 26.20 | 19.60 | 26.60 | 28.40 | ---   |
|                | 2002      | ---                     | ---   | ---   | ---   | 40.70 | 27.30 | 24.80 | 22.50 | 21.30 | 25.90 | 38.10 | ---   |

1/ Prices are F.O.B. shipping point.

## County Agricultural Commissioners

| <u>County</u>   | <u>Commissioner</u>  | <u>Address</u>                                                                          | <u>Telephone</u>            | <u>Fax</u> |
|-----------------|----------------------|-----------------------------------------------------------------------------------------|-----------------------------|------------|
| Alameda         | Dennis F. Bray       | 224 W. Winton Avenue, Room 184, Hayward, CA 94544-1215                                  | (510) 670-5232              | 783-3928   |
| Alpine          | Bill Stephans        | 311 Fair Lane, Placerville, CA 95667-4195                                               | (530) 621-5520              | 626-4756   |
| Amador          | Michael E. Boitano   | 12200 Airport Road, Jackson, CA 95642-9527                                              | (209) 223-6487              | 223-3312   |
| Butte           | Richard B. Price     | 316 Nelson Avenue, Oroville, CA 95965-3318                                              | (530) 538-7381              | 538-7594   |
| Calaveras       | Jearl D. Howard      | 891 Mountain Ranch Road, San Andreas, CA 95249-9709<br>Government Center                | (209) 754-6504              | 754-6521   |
| Colusa          | Harry A. Krug        | 100 Sunrise Blvd., Suite F, Colusa, CA 95932-1029                                       | (530) 458-0580              | 458-5000   |
| Contra Costa    | Edward P. Meyer      | 2366 'A' Stanwell Circle, Concord, CA 94520-4804                                        | (925) 646-5250              | 646-5732   |
| Del Norte       | Glenn E. Anderson    | 2650 Washington Blvd., Crescent City, CA 95531-8627                                     | (707) 464-7231              | 464-6044   |
| El Dorado       | Bill Stephans        | 311 Fair Lane, Placerville, CA 95667-4195                                               | (530) 621-5520              | 626-4756   |
| Fresno          | Jerry Prieto, Jr.    | 1730 S. Maple Avenue, Fresno, CA 93702-4596                                             | (559) 456-7510              | 456-7379   |
| Glenn           | Bill Duckworth       | P.O. Box 351, Willows, CA 95988<br>720 N. Colusa Street                                 | (530) 934-6501              | 934-6503   |
| Humboldt        | John E. Falkenstrom  | 5630 S. Broadway, Eureka, CA 95503-6998                                                 | (707) 445-7223              | 445-7220   |
| Imperial        | Stephen L. Birdsall  | 150 South Ninth Street, El Centro, CA 92243-2850                                        | (760) 482-4314              | 353-9420   |
| Inyo            | George L. Milovich   | 207 W. South Street, Bishop, CA 93514-3492<br>County Services Bldg.                     | (760) 873-7860              | 872-1610   |
| Kern            | Theodore K. Davis    | 1001 South Mt. Vernon Avenue, Bakersfield, CA 93307-2857                                | (661) 868-6300              | 868-6301   |
| Kings           | Tim Niswander        | 680 N. Campus Drive, Suite B, Hanford, CA 93230-5923                                    | (559) 582-3211<br>Ext. 2830 | 582-5251   |
| Lake            | Steve Hajik          | 883 Lakeport Blvd., Lakeport, CA 95453                                                  | (707) 263-0217              | 263-1052   |
| Lassen          | Kenneth R. Smith     | 175 Russell Avenue, Susanville, CA 96130-4299                                           | (530) 251-8110              | 257-6515   |
| Los Angeles     | Cato Fiksdal         | 12300 Lower Azusa Road, Arcadia, CA 91006-5872                                          | (626) 575-5451              | 350-3243   |
| Madera          | Robert J. Rolan      | 332 Madera Avenue, Madera, CA 93637-5499                                                | (559) 675-7876              | 674-4071   |
| Marin           | Stacy K. Carlsen     | 1682 Novato Blvd., Suite 150-A, Novato, CA 94947-7021                                   | (415) 499-6700              | 499-7543   |
| Mariposa        | Cathi Boze           | P.O. Box 905, Mariposa, CA 95338-0905<br>5009 Fairgrounds Road, Mariposa, CA 95338-9435 | (209) 966-2075              | 966-2056   |
| Mendocino       | David A. Bengston    | 579 Low Gap Road, Ukiah, CA 95482-3745                                                  | (707) 463-4208              | 463-0240   |
| Merced          | David A. Robinson    | 2139 Wardrobe Avenue, Merced, CA 95340-6495                                             | (209) 385-7431              | 725-3536   |
| Modoc           | Joe A. Moreo         | 202 West Fourth Street, Alturas, CA 96101-3915                                          | (530) 233-6401              | 233-5542   |
| Mono            | George L. Milovich   | 207 W. South Street, Bishop, CA 93514-3492<br>County Services Bldg.                     | (760) 873-7860              | 872-1610   |
| Monterey        | Eric Lauritzen       | 1428 Abbott Street, Salinas, CA 93901                                                   | (831) 759-7325              | 422-5003   |
| Napa            | David R. Whitmer     | 1710 Soscol Avenue, Suite 3, Napa, CA 94559-1315                                        | (707) 253-4357              | 253-4881   |
| Nevada          | Paul Boch            | 255 S. Auburn Street, Grass Valley, CA 95945-7289                                       | (530) 273-2648              | 273-1713   |
| Orange          | Richard M. Le Feuvre | 10852 Douglass Road, Bldg. D, Anaheim, CA 92806-6050                                    | (714) 447-7100              | 774-2741   |
| Placer          | Christine Turner     | 11477 'E' Avenue, Auburn, CA 95603-2799                                                 | (530) 889-7372              | 823-1698   |
| Plumas          | Karl Bishop          | 208 Fairgrounds Road, Quincy, CA 95971-9462                                             | (530) 283-6365              | 283-4210   |
| Riverside       | John R. Snyder       | P.O. Box 1089, Riverside, CA 92502-1089<br>4080 Lemon Street, Room 19                   | (909) 955-3000              | 955-3012   |
| Sacramento      | Frank E. Carl        | 4137 Branch Center Road, Sacramento, CA 95827-3897                                      | (916) 875-6603              | 875-6150   |
| San Benito      | Paul Matulich        | 3224 Southside Road, Hollister, CA 95023-0699                                           | (831) 637-5344              | 637-9015   |
| San Bernardino  | Edouard P. Layaye    | 777 E. Rialto Avenue, San Bernardino, CA 92415-0720                                     | (909) 387-2115              | 387-2449   |
| San Diego       | Kathleen A. Thuner   | 5555 Overland Avenue, Bldg. 3, San Diego, CA 92123-1292                                 | (858) 694-2741              | 565-7046   |
| San Francisco   | David C. Frieders    | 501 Cesar Chavez Street, Suite 109-A, San Francisco, CA 94124                           | (415) 285-5010              | 285-8776   |
| San Joaquin     | Scott T. Hudson      | P.O. Box 1809, Stockton, CA 95201-1809<br>1868 E. Hazelton Avenue                       | (209) 468-3300              | 468-3330   |
| San Luis Obispo | Robert Lilley        | 2156 Sierra Way, Suite A, San Luis Obispo, CA 93401-4556                                | (805) 781-5910              | 781-1035   |
| San Mateo       | Gail M. Raabe        | P.O. Box 999, Redwood City, CA 94064-0999<br>728 Heller Street                          | (650) 363-4700              | 367-0130   |

## County Agricultural Commissioners

| <u>County</u> | <u>Commissioner</u> | <u>Address</u>                                                                           | <u>Telephone</u> | <u>Fax</u> |
|---------------|---------------------|------------------------------------------------------------------------------------------|------------------|------------|
| Santa Barbara | William D. Gillette | 263 Camino Del Remedio, Santa Barbara, CA 93110-1335                                     | (805) 681-5600   | 681-5603   |
| Santa Clara   | Greg Van Wassenhove | 1553 Berger Drive, Bldg. 1, San Jose, CA 95112-2795                                      | (408) 918-4600   | 286-2460   |
| Santa Cruz    | David W. Moeller    | 175 Westridge Drive, Watsonville, CA 95076-2797                                          | (831) 763-8080   | 763-8234   |
| Shasta        | Mary Pfeiffer       | 3179 Bechelli Lane, Suite 210, Redding, CA 96002-2041                                    | (530) 224-4949   | 224-4951   |
| Sierra        | Karl Bishop         | 208 Fairgrounds Road, Quincy, CA 95971-9462                                              | (530) 283-6365   | 283-4210   |
| Siskiyou      | Ag. Commissioner    | 525 S. Foothill Drive, Yreka, CA 96097-3090                                              | (530) 841-4025   | 842-6690   |
| Solano        | Susan E. Cohen      | 501 Texas Street, Fairfield, CA 94533                                                    | (707) 421-7465   | 429-0827   |
| Sonoma        | John G. Westoby     | 133 Aviation Blvd., Suite 110, Santa Rosa, CA 95403                                      | (707) 565-2371   | 565-3850   |
| Stanislaus    | Dennis Gudgel       | 3800 Cornucopia Way, Suite B, Modesto, CA 95358                                          | (209) 525-4730   | 525-4789   |
| Sutter        | Mark P. Quisenberry | 142 Garden Highway, Yuba City, CA 95991-5512                                             | (530) 822-7500   | 822-7510   |
| Tehama        | Mark D. Black       | P.O. Box 38, Red Bluff, CA 96080-0038<br>1760 Walnut Street                              | (530) 527-4504   | 529-1049   |
| Trinity       | Mark T. Lockhart    | P.O. Box 1466, Weaverville, CA 96093-1466<br>173 Tombell Road                            | (530) 623-1356   | 623-1391   |
| Tulare        | Gary W. Kunkel      | 4437 South Laspina Street, Tulare, CA 93291-4584                                         | (559) 685-3323   | 685-3336   |
| Tuolumne      | Gary Caseri         | 2 South Green Street, Sonora, CA 95370-4617<br>22365 S. Airport Road, Colombia, CA 95310 | (209) 533-5691   | 533-5520   |
| Ventura       | W. Earl McPhail     | P.O. Box 889, Santa Paula, CA 93061-0889<br>815 E. Santa Barbara Street                  | (805) 933-8415   | 525-8922   |
| Yolo          | Rick Landon         | 70 Cottonwood Street, Woodland, CA 95695-2593                                            | (530) 666-8140   | 662-6094   |
| Yuba          | Dennis S. Pooler    | 938 - 14th Street, Marysville, CA 95901                                                  | (530) 749-5400   | 743-4442   |

*California Agricultural Statistics Service  
publications are available  
on the Internet at:*

*<http://www.nass.usda.gov/ca>*

# CALIFORNIA AGRICULTURAL STATISTICS SERVICE

UNITED STATES  
DEPARTMENT OF AGRICULTURE  
NATIONAL AGRICULTURAL STATISTICS SERVICE

STATE OF CALIFORNIA  
DEPT. OF FOOD AND AGRICULTURE  
MARKETING SERVICES DIVISION

P.O. Box 1258  
Sacramento, CA 95812-1258  
Phone (916) 498-5161 --- Fax (916) 498-5186

## PUBLICATION AND SUBSCRIPTION REQUEST FORM

Complete the "publication request" if you would like to purchase one or more publications on a one-time basis only. We will mail you the latest release unless you indicate otherwise. When ordering diskettes, please be sure to check the appropriate file format.

Complete the "subscription request" if you would like to be placed on our regular mailing list for upcoming releases.

For all requests, check the publications you wish to receive, enter the amount in the space provided and total the cost of all fees. Please be sure to complete the "requested by" information.

Publications on this order form can be viewed free of charge at [www.nass.usda.gov/ca](http://www.nass.usda.gov/ca). Please forward any inquiries to our e-mail address at [nass-ca@nass.usda.gov](mailto:nass-ca@nass.usda.gov).

| PUBLICATION REQUEST                                                                                                                                                                                                                            |                                                                                                                                                                                                                                                                                                                                                                        |                               |                   |              |
|------------------------------------------------------------------------------------------------------------------------------------------------------------------------------------------------------------------------------------------------|------------------------------------------------------------------------------------------------------------------------------------------------------------------------------------------------------------------------------------------------------------------------------------------------------------------------------------------------------------------------|-------------------------------|-------------------|--------------|
| Check Here                                                                                                                                                                                                                                     | Publication Title and Description                                                                                                                                                                                                                                                                                                                                      | List the Years You Are Buying | Domestic Charge   | Enter Amount |
| <b>HARD COPY</b>                                                                                                                                                                                                                               |                                                                                                                                                                                                                                                                                                                                                                        |                               |                   |              |
|                                                                                                                                                                                                                                                | <b>California Agricultural Resource Directory:</b> 2002 Annual Bulletin (2001 Crop)<br>Year-end summary for field crops, fruit and nut crops, vegetable and melon crops, livestock, dairy and poultry. Also includes cash receipts, exports, floriculture, top counties, and U.S. and state rankings.<br><b>The 2003 Annual Bulletin (2002 Crop) is not available.</b> |                               | \$ 15.00          |              |
|                                                                                                                                                                                                                                                | <b>County Agricultural Commissioners' Data:</b> Annual Bulletin<br>County acreage, production and value by commodity. Crop years available: 1980-2002                                                                                                                                                                                                                  |                               | \$ 20.00 per year |              |
|                                                                                                                                                                                                                                                | <b>Dot Maps:</b> 1990 Bulletin<br>Acreage, yield, production and value for 50 major commodities.                                                                                                                                                                                                                                                                       |                               | \$ 15.00          |              |
|                                                                                                                                                                                                                                                | <b>Grape Acreage:</b> Annual Bulletin<br>Grape acreage by year planted, variety and county.<br>Crop years available: 1961, 1964, 1969 and 1972-2002                                                                                                                                                                                                                    |                               | \$ 10.00 per year |              |
|                                                                                                                                                                                                                                                | <b>Grape Crush Report (Final):</b> Annual Bulletin<br>Tons purchased, crushed, Brix factors and price per ton by variety and district.<br>Crop years available: 1976-2002                                                                                                                                                                                              |                               | \$ 10.00 per year |              |
|                                                                                                                                                                                                                                                | <b>Summary of County Agricultural Commissioners' Reports:</b> Annual Bulletin<br>Gross values by commodity groups. Crop years available: 1981-2002                                                                                                                                                                                                                     |                               | \$ 5.00 per year  |              |
| <b>DISKETTE</b><br>All data files are IBM-PC compatible on 3.5 disks. Operating System: Windows 95/98<br>Please indicate file format: <input type="checkbox"/> WordPerfect <input type="checkbox"/> Spreadsheet <input type="checkbox"/> Xbase |                                                                                                                                                                                                                                                                                                                                                                        |                               |                   |              |
|                                                                                                                                                                                                                                                | <b>County Agricultural Commissioners' Data:</b> Annual Bulletin<br>County acreage, production and value by commodity. Crop years available: 1986-2002                                                                                                                                                                                                                  |                               | \$ 20.00 per year |              |
|                                                                                                                                                                                                                                                | <b>Grape Acreage:</b> Annual Bulletin<br>Grape acreage by year planted, variety and county. Crop years available: 1991-2002                                                                                                                                                                                                                                            |                               | \$ 20.00 per year |              |
|                                                                                                                                                                                                                                                | <b>Grape Crush Report (Final):</b> Annual Bulletin<br>Tons purchased, crushed, Brix factors and price per ton by variety and district.<br>Crop years available: 1991-2002                                                                                                                                                                                              |                               | \$ 20.00 per year |              |
| <b>TOTAL ONE-TIME CHARGE</b>                                                                                                                                                                                                                   |                                                                                                                                                                                                                                                                                                                                                                        |                               |                   |              |

*Continued on back of page*

# CALIFORNIA AGRICULTURAL STATISTICS SERVICE

## PUBLICATION AND SUBSCRIPTION REQUEST FORM — Continued

| SUBSCRIPTION REQUEST           |                                                                                                                                                                               |                                      |                |              |
|--------------------------------|-------------------------------------------------------------------------------------------------------------------------------------------------------------------------------|--------------------------------------|----------------|--------------|
| Check Here                     | Publication Title and Description                                                                                                                                             | Subscription Rate (First-Class Mail) |                | Enter Amount |
|                                |                                                                                                                                                                               | Foreign<br>1/                        | Domestic<br>2/ |              |
| 907                            | <b>Crop Weather Report:</b> Weekly<br>Weather's effect on crops; planting and harvesting information; weekly and accumulated precipitation data, and temperatures by station. | \$ 60.00                             | \$ 30.00       |              |
| 910                            | <b>Field Crop Review:</b> Monthly<br>Grain, cotton, hay, potatoes, sugar beets, etc.; acreage, production, value; price and /warehouse data.                                  | \$ 30.00                             | \$ 15.00       |              |
| 920                            | <b>Fruit and Nut Review:</b> Monthly except November<br>Berry, grape, citrus, deciduous fruit and nut acreage, production, price and utilization.                             | \$ 30.00                             | \$ 15.00       |              |
| 922                            | <b>Grape Crush Report (Preliminary and Final):</b> February & March Bulletins<br>Tons purchased, crushed, Brix factors and price per ton by variety and district.             | \$ 40.00                             | \$ 20.00       |              |
| 923                            | <b>Grape Acreage:</b> Annual Bulletin<br>Grape acreage by year planted, variety and county.                                                                                   | \$ 20.00                             | \$ 10.00       |              |
| 931                            | <b>Vegetable Review:</b> January, April, July, September and October<br>Processing and fresh market vegetable and potato acreage, production and value.                       | \$ 14.00                             | \$ 7.00        |              |
| 940                            | <b>Livestock Review:</b> Monthly<br>Livestock inventories, intentions and values; pasture, slaughter and on-feed data for cattle and sheep.                                   | \$ 30.00                             | \$ 15.00       |              |
| 960                            | <b>Poultry Review:</b> Monthly<br>Chicken and turkey settings, hatchings, eggs produced, inventory, value and cold storage.                                                   | \$ 30.00                             | \$ 15.00       |              |
| <b>TOTAL SUBSCRIPTION FEES</b> |                                                                                                                                                                               |                                      |                |              |

1/ Foreign mailing is via air mail. All checks must be drawn on a U.S. bank.

2/ Mexico's rate is the same as domestic rate.

| PAYMENT                                    |                                                                                          |
|--------------------------------------------|------------------------------------------------------------------------------------------|
| Make check or money order payable to:      | <b>CASS/CDFA</b>                                                                         |
| Send this request form with remittance to: | California Agricultural Statistics Service<br>P.O. Box 1258<br>Sacramento, CA 95812-1258 |

| REQUESTED BY          |
|-----------------------|
| Company or Firm Name: |
| Name:                 |
| Mailing Address:      |
| City, State & Zip:    |
| E-mail Address:       |
