# Supplementary material for: The Elephant in the room: What can we learn from California regarding the use of sport hunting of pumas (Puma concolor) as a management tool?
Source: PLOS journal article supplement (doi:10.1371/journal.pone.0224638), 2020-02-13
Supplement: S3 (10.1371/journal.pone.0224638.s003) [file journal.pone.0224638.s003]

# Sheep and Goats Predator Loss

Released May 5, 2000, by the National Agricultural Statistics Service (NASS), Agricultural Statistics Board, U.S. Department of Agriculture. For information on "Sheep and Goats Predator Loss" call Steve Anderson at 202-690-3236, office hours 7:30 a.m. to 4:30 p.m. ET.

## U.S. Sheep and Lamb Predator Loss

**Sheep and lamb** losses from animal predators in the United States totaled 273,000 during 1999. This represented 36.7 percent of the total losses from all causes and resulted in a loss of \$16.5 million due to predators to farmers and ranchers.

Coyotes caused the majority of sheep and lamb losses to predators. They accounted for 60.7 percent of the total.

Coyotes were also the largest predator of **goats** in the three major states (AZ, NM, and TX) accounting for 35.6 percent of predator death losses. The value of goats lost from all predators was \$3.4 million.

Use of non-lethal predator controls is also highlighted in this publication. Farmers and ranchers throughout the United States spent \$8.8 million on non-lethal methods to prevent predator loss of sheep and lambs. Another \$1.0 million was spent on non-lethal predator controls for goats and kids.

This report is released as a cooperative effort between the National Agricultural Statistics Service and Animal and Plant Health Inspection Service - Wildlife Services and National Animal Health Monitoring System.

**Losses of Sheep and Lambs from Predators: Number of Head  
and Total Value, United States, 1999**

| Predator                             | Number<br>of Head | % of Total<br>Predators | Total<br>Value       |
|--------------------------------------|-------------------|-------------------------|----------------------|
|                                      | <i>Number</i>     | <i>Percent</i>          | <i>1,000 Dollars</i> |
| Coyotes                              | 165,800           | 60.7                    | 9,637                |
| Dogs                                 | 41,300            | 15.1                    | 2,982                |
| Mountain Lions,<br>Cougars, or Pumas | 15,600            | 5.7                     | 998                  |
| Bears                                | 7,800             | 2.9                     | 555                  |
| Foxes                                | 8,100             | 3.0                     | 400                  |
| Eagles                               | 10,700            | 3.9                     | 522                  |
| Bobcats                              | 12,700            | 4.7                     | 650                  |
| All Other Animals                    | 11,000            | 4.0                     | 758                  |
| US                                   | 273,000           | 100.0                   | 16,502               |

**Losses of Sheep and Lambs: Number and Percent by Coyotes  
and Dogs by State and United States, 1999**

| State                | Coyotes     |               |             |               | Dogs <sup>1</sup> |               |             |               |
|----------------------|-------------|---------------|-------------|---------------|-------------------|---------------|-------------|---------------|
|                      | Sheep       | % Total Pred. | Lambs       | % Total Pred. | Sheep             | % Total Pred. | Lambs       | % Total Pred. |
|                      | <i>Head</i> | <i>Pct</i>    | <i>Head</i> | <i>Pct</i>    | <i>Head</i>       | <i>Pct</i>    | <i>Head</i> | <i>Pct</i>    |
| AZ                   | 400         | 80.0          | 900         | 60.0          |                   |               | 400         | 26.7          |
| CA                   | 5,000       | 55.6          | 6,500       | 75.6          | 3,000             | 33.3          | 1,000       | 11.6          |
| CO                   | 1,000       | 33.3          | 6,400       | 71.1          | 400               | 13.3          | 1,100       | 12.2          |
| ID                   | 1,700       | 60.7          | 6,100       | 82.4          | 500               | 17.9          | 400         | 5.4           |
| IL                   | 300         | 50.0          | 800         | 53.3          | 300               | 50.0          | 600         | 40.0          |
| IN                   | 100         | 10.0          | 300         | 50.0          | 900               | 90.0          | 300         | 50.0          |
| IA                   | 600         | 42.9          | 1,400       | 56.0          | 800               | 57.1          | 1,100       | 44.0          |
| KS                   | 300         | 60.0          | 500         | 71.4          | 200               | 40.0          | 200         | 28.6          |
| MI                   | 100         | 50.0          | 800         | 61.5          | 100               | 50.0          | 400         | 30.8          |
| MN                   | 100         | 5.9           | 400         | 17.4          | 1,000             | 58.8          | 1,000       | 43.5          |
| MO                   | 400         | 44.4          | 1,600       | 64.0          | 400               | 44.4          | 700         | 28.0          |
| MT                   | 2,800       | 73.7          | 10,000      | 79.4          | 300               | 7.9           | 200         | 1.6           |
| NE                   | 800         | 66.7          | 1,700       | 73.9          | 300               | 25.0          | 500         | 21.7          |
| NV                   | 2,700       | 67.5          | 8,000       | 80.0          |                   |               |             |               |
| N ENG <sup>2</sup>   | 200         | 100.0         | 300         | 100.0         |                   |               |             |               |
| NM                   | 900         | 32.1          | 3,800       | 50.7          | 1,200             | 42.9          | 300         | 4.0           |
| NY                   | 400         | 50.0          | 500         | 71.4          | 300               | 37.5          | 100         | 14.3          |
| ND                   | 800         | 88.9          | 3,100       | 88.6          |                   |               | 300         | 8.6           |
| OH                   | 500         | 71.4          | 800         | 66.7          | 200               | 28.6          | 300         | 25.0          |
| OK                   | 200         | 40.0          | 1,100       | 52.4          | 300               | 60.0          | 900         | 42.9          |
| OR                   | 1,800       | 54.5          | 5,500       | 73.3          | 700               | 21.2          | 800         | 10.7          |
| PA                   | 100         | 25.0          | 400         | 44.4          | 300               | 75.0          | 200         | 22.2          |
| SD                   | 2,300       | 82.1          | 7,500       | 68.2          | 400               | 14.3          | 600         | 5.5           |
| TX                   | 6,000       | 42.9          | 23,000      | 51.1          | 4,200             | 30.0          | 4,000       | 8.9           |
| UT                   | 3,800       | 57.6          | 12,000      | 64.2          | 500               | 7.6           | 1,200       | 6.4           |
| VA                   | 400         | 44.4          | 1,500       | 60.0          | 400               | 44.4          | 500         | 20.0          |
| WA                   | 200         | 33.3          | 500         | 38.5          |                   |               | 300         | 23.1          |
| WV                   | 300         | 37.5          | 1,800       | 64.3          | 400               | 50.0          | 700         | 25.0          |
| WI                   | 200         | 50.0          | 300         | 60.0          |                   |               |             |               |
| WY                   | 4,000       | 66.7          | 17,000      | 77.3          | 400               | 6.7           | 400         | 1.8           |
| Oth Sts <sup>3</sup> | 1,400       | 29.8          | 1,500       | 26.3          | 2,000             | 42.6          | 2,800       | 49.1          |
| Unpub                |             |               |             |               | 300               |               | 200         |               |
| US                   | 39,800      | 51.7          | 126,000     | 64.3          | 19,800            | 25.7          | 21,500      | 11.0          |

<sup>1</sup> Unpublished States include NV and WI for sheep and lambs; AZ, ND, and WA for sheep only.

<sup>2</sup> N ENG includes CT, ME, MA, NH, RI, and VT.

<sup>3</sup> Other States include AL, AK, AR, DE, FL, GA, HI, KY, LA, MD, MS, NJ, NC, SC, and TN.

**Losses of Sheep and Lambs: Number and Percent by Mountain Lions, Cougars,  
or Pumas, Bears, Foxes, and Eagles by State and United States, 1999**

| State | Mountain Lions, Cougars, or Pumas <sup>1</sup> |               |             |               | Bears <sup>2</sup>  |               |             |               |
|-------|------------------------------------------------|---------------|-------------|---------------|---------------------|---------------|-------------|---------------|
|       | Sheep                                          | % Total Pred. | Lambs       | % Total Pred. | Sheep               | % Total Pred. | Lambs       | % Total Pred. |
|       | <i>Head</i>                                    | <i>Pct</i>    | <i>Head</i> | <i>Pct</i>    | <i>Head</i>         | <i>Pct</i>    | <i>Head</i> | <i>Pct</i>    |
| CA    | 600                                            | 6.7           | 700         | 8.1           |                     |               |             |               |
| CO    | 400                                            | 13.3          | 300         | 3.3           | 1,000               | 33.3          | 700         | 7.8           |
| ID    | 200                                            | 7.1           | 400         | 5.4           | 400                 | 14.3          | 300         | 4.1           |
| MT    | 200                                            | 5.3           | 200         | 1.6           | 200                 | 5.3           | 200         | 1.6           |
| NV    | 1,100                                          | 27.5          | 1,300       | 13.0          |                     |               | 400         | 4.0           |
| NM    | 400                                            | 14.3          | 400         | 5.3           |                     |               |             |               |
| OR    | 500                                            | 15.2          | 800         | 10.7          | 200                 | 6.1           |             |               |
| SD    |                                                |               | 400         | 3.6           |                     |               |             |               |
| TX    | 300                                            | 2.1           | 800         | 1.8           |                     |               |             |               |
| UT    | 1,200                                          | 18.2          | 2,900       | 15.5          | 1,000               | 15.2          | 1,500       | 8.0           |
| WA    | 200                                            | 33.3          | 400         | 30.8          |                     |               | 100         | 7.7           |
| WV    |                                                |               |             |               | 100                 | 12.5          | 200         | 7.1           |
| WY    | 700                                            | 11.7          | 900         | 4.1           | 300                 | 5.0           | 500         | 2.3           |
| Unpub | 100                                            |               | 200         |               | 400                 |               | 300         |               |
| US    | 5,900                                          | 7.6           | 9,700       | 4.9           | 3,600               | 4.6           | 4,200       | 2.1           |
|       | Foxes <sup>3</sup>                             |               |             |               | Eagles <sup>4</sup> |               |             |               |
| CO    |                                                |               | 200         | 2.2           |                     |               |             |               |
| MT    |                                                |               | 600         | 4.8           | 100                 | 2.6           | 900         | 7.1           |
| NM    |                                                |               |             |               |                     |               | 700         | 9.3           |
| OR    |                                                |               |             |               |                     |               | 200         | 2.7           |
| SD    |                                                |               | 1,700       | 15.5          |                     |               | 700         | 6.4           |
| TX    | 600                                            | 4.3           | 3,100       | 6.9           | 300                 | 2.1           | 4,600       | 10.2          |
| UT    |                                                |               | 200         | 1.1           |                     |               | 300         | 1.6           |
| WY    | 100                                            | 1.7           | 1,000       | 4.5           | 400                 | 6.7           | 2,200       | 10.0          |
| Unpub |                                                |               | 600         |               |                     |               | 300         |               |
| US    | 700                                            | 0.9           | 7,400       | 3.8           | 800                 | 1.0           | 9,900       | 5.1           |

<sup>1</sup> Unpublished States includes AZ for sheep and lambs; SD for sheep only; MO and NE for lambs only.

<sup>2</sup> Unpublished States includes CA for sheep and lambs; NV, NM, VA, and WA for sheep only; OR, TX, and WI for lambs only.

<sup>3</sup> Unpublished States include ID, MN, NM, NY, ND, OK, OR, VA, and WV for lambs only.

<sup>4</sup> Unpublished States include CA, CO, MN, NV, and ND for lambs only.

**Losses of Sheep and Lambs: Number and Percent by Bobcats  
and All Other Animals by State and United States, 1999**

| State                   | Bobcat <sup>1</sup> |               |             |               | All Other Animals <sup>2 3</sup> |               |             |               |
|-------------------------|---------------------|---------------|-------------|---------------|----------------------------------|---------------|-------------|---------------|
|                         | Sheep               | % Total Pred. | Lambs       | % Total Pred. | Sheep                            | % Total Pred. | Lambs       | % Total Pred. |
|                         | <i>Head</i>         | <i>Pct</i>    | <i>Head</i> | <i>Pct</i>    | <i>Head</i>                      | <i>Pct</i>    | <i>Head</i> | <i>Pct</i>    |
| CA                      |                     |               | 200         | 2.3           | 200                              | 2.2           |             |               |
| IL                      |                     |               |             |               |                                  |               | 100         | 6.7           |
| MI                      |                     |               |             |               |                                  |               | 100         | 7.7           |
| MN                      |                     |               |             |               | 600                              | 35.3          | 800         | 34.8          |
| MO                      |                     |               |             |               | 100                              | 11.1          |             |               |
| MT                      |                     |               |             |               | 200                              | 5.3           | 400         | 3.2           |
| NM                      | 200                 | 7.1           | 2,100       | 28.0          |                                  |               |             |               |
| OH                      |                     |               |             |               |                                  |               | 100         | 8.3           |
| PA                      |                     |               |             |               |                                  |               | 300         | 33.3          |
| TX                      | 1,800               | 12.9          | 7,000       | 15.6          | 800                              | 5.7           | 2,400       | 5.3           |
| UT                      | 100                 | 1.5           | 500         | 2.7           |                                  |               | 100         | 0.5           |
| VA                      |                     |               | 300         | 12.0          |                                  |               |             |               |
| WY                      |                     |               |             |               | 100                              | 1.7           |             |               |
| Oth<br>Sts <sup>4</sup> |                     |               |             |               | 1,300                            | 27.7          | 1,400       | 24.6          |
| Unpub                   | 200                 |               | 300         |               | 800                              |               | 1,200       |               |
| US                      | 2,300               | 3.0           | 10,400      | 5.3           | 4,100                            | 5.3           | 6,900       | 3.5           |

<sup>1</sup> Unpublished States include CA and NE for sheep only; CO, MT, NV, OK, and OR for lambs only.

<sup>2</sup> Unpublished States include CO, NM, NY, OR, SD, VA, and WI for sheep and lambs; ND and WA for sheep only; AZ, CA, ID, MO, NE, NV, and WV for lambs only.

<sup>3</sup> Other predators include ravens, vultures, wolves, pigs, and other animals.

<sup>4</sup> Other States include AL, AK, AR, DE, FL, GA, HI, KY, LA, MD, MS, NJ, NC, SC, and TN.

**Losses of Lambs: By All Causes and Predators, Number  
by State and United States, 1999**

| State                   | All Causes  |             | Predators   |             |
|-------------------------|-------------|-------------|-------------|-------------|
|                         | Sheep       | Lambs       | Sheep       | Lambs       |
|                         | <i>Head</i> | <i>Head</i> | <i>Head</i> | <i>Head</i> |
| AZ                      | 2,000       | 2,000       | 500         | 1,500       |
| CA                      | 23,000      | 12,000      | 9,000       | 8,600       |
| CO                      | 8,000       | 40,000      | 3,000       | 9,000       |
| ID                      | 10,000      | 16,000      | 2,800       | 7,400       |
| IL                      | 4,000       | 8,000       | 600         | 1,500       |
| IN                      | 3,000       | 6,000       | 1,000       | 600         |
| IA                      | 10,000      | 28,000      | 1,400       | 2,500       |
| KS                      | 4,500       | 7,000       | 500         | 700         |
| MI                      | 2,500       | 7,000       | 200         | 1,300       |
| MN                      | 9,000       | 20,000      | 1,700       | 2,300       |
| MO                      | 2,500       | 8,000       | 900         | 2,500       |
| MT                      | 18,000      | 23,000      | 3,800       | 12,600      |
| NE                      | 5,000       | 11,000      | 1,200       | 2,300       |
| NV                      | 7,000       | 13,000      | 4,000       | 10,000      |
| N ENG <sup>1</sup>      | 1,900       | 3,500       | 200         | 300         |
| NM                      | 10,000      | 11,000      | 2,800       | 7,500       |
| NY                      | 3,000       | 6,000       | 800         | 700         |
| ND                      | 5,000       | 15,000      | 900         | 3,500       |
| OH                      | 6,000       | 14,000      | 700         | 1,200       |
| OK                      | 3,000       | 6,000       | 500         | 2,100       |
| OR                      | 8,000       | 13,000      | 3,300       | 7,500       |
| PA                      | 3,000       | 8,000       | 400         | 900         |
| SD                      | 16,000      | 39,000      | 2,800       | 11,000      |
| TX                      | 40,000      | 65,000      | 14,000      | 45,000      |
| UT                      | 18,000      | 26,000      | 6,600       | 18,700      |
| VA                      | 3,000       | 7,000       | 900         | 2,500       |
| WA                      | 2,000       | 3,000       | 600         | 1,300       |
| WV                      | 2,000       | 6,000       | 800         | 2,800       |
| WI                      | 2,500       | 8,500       | 400         | 500         |
| WY                      | 18,000      | 35,000      | 6,000       | 22,000      |
| Oth<br>Sts <sup>2</sup> | 11,000      | 15,000      | 4,700       | 5,700       |
| US                      | 260,900     | 482,000     | 77,000      | 196,000     |

<sup>1</sup> N ENG includes CT, ME, MA, NH, RI, and VT.

<sup>2</sup> Other States include AL, AK, AR, DE, FL, GA, HI, KY, LA, MD, MS, NJ, NC, SC, and TN.

**Losses of Sheep and Lambs from Predators: Total Value per Head and Total Value  
by State and United States, 1999**

| State                   | Value per Head     |                    | Total Value          |                      |
|-------------------------|--------------------|--------------------|----------------------|----------------------|
|                         | Sheep <sup>1</sup> | Lambs <sup>2</sup> | Sheep                | Lambs                |
|                         | <i>Dollars</i>     | <i>Dollars</i>     | <i>1,000 Dollars</i> | <i>1,000 Dollars</i> |
| AZ                      | 100.00             | 45.00              | 50                   | 68                   |
| CA                      | 104.00             | 45.00              | 936                  | 387                  |
| CO                      | 99.00              | 67.00              | 297                  | 603                  |
| ID                      | 101.00             | 42.00              | 283                  | 311                  |
| IL                      | 136.00             | 41.00              | 82                   | 62                   |
| IN                      | 145.00             | 43.00              | 145                  | 26                   |
| IA                      | 115.00             | 42.00              | 161                  | 105                  |
| KS                      | 96.00              | 45.00              | 48                   | 32                   |
| MI                      | 124.00             | 41.00              | 25                   | 53                   |
| MN                      | 93.00              | 44.00              | 158                  | 101                  |
| MO                      | 94.00              | 45.00              | 85                   | 113                  |
| MT                      | 88.00              | 47.00              | 334                  | 592                  |
| NE                      | 97.00              | 44.00              | 116                  | 101                  |
| NV                      | 102.00             | 42.00              | 408                  | 420                  |
| N ENG <sup>3</sup>      | 171.00             | 66.00              | 34                   | 20                   |
| NM                      | 81.00              | 45.00              | 227                  | 338                  |
| NY                      | 118.00             | 50.00              | 94                   | 35                   |
| ND                      | 85.00              | 43.00              | 77                   | 151                  |
| OH                      | 141.00             | 44.00              | 99                   | 53                   |
| OK                      | 128.00             | 44.00              | 64                   | 92                   |
| OR                      | 80.00              | 40.00              | 264                  | 300                  |
| PA                      | 115.00             | 49.00              | 46                   | 44                   |
| SD                      | 93.00              | 48.00              | 260                  | 528                  |
| TX                      | 71.00              | 46.00              | 994                  | 2,070                |
| UT                      | 103.00             | 46.00              | 680                  | 860                  |
| VA                      | 111.00             | 45.00              | 100                  | 113                  |
| WA                      | 93.00              | 40.00              | 56                   | 52                   |
| WV                      | 89.00              | 44.00              | 71                   | 123                  |
| WI                      | 101.00             | 42.00              | 40                   | 21                   |
| WY                      | 88.00              | 46.00              | 528                  | 1,012                |
| Oth<br>Sts <sup>4</sup> | 146.00             | 47.00              | 686                  | 268                  |
| US <sup>5</sup>         | 97.00              | 46.00              | 7,448                | 9,054                |

<sup>1</sup> Sheep value per head is based on a two-year straight average of the value of ewes reported in the January 1 Sheep Survey from 1999 to 2000.

<sup>2</sup> Lamb value per head is based on the market year average lamb price. An average lamb weight of 60 pounds was used in all States except Colorado, where a 90 pound average was used.

<sup>3</sup> N ENG includes CT, ME, MA, NH, RI, and VT.

<sup>4</sup> Other States include AL, AK, AR, DE, FL, GA, HI, KY, LA, MD, MS, NJ, NC, SC, and TN.

<sup>5</sup> US value per head rounded to the nearest dollar.

**Losses of All Goats (Angora and Other): Number by Specific  
Predators and Total Value, 3-State Total, 1999 <sup>1</sup>**

| Predator                             | Losses      | Total Value          |
|--------------------------------------|-------------|----------------------|
|                                      | <i>Head</i> | <i>1,000 Dollars</i> |
| Coyotes                              | 21,700      |                      |
| Dogs                                 | 10,700      |                      |
| Mountain Lions,<br>Cougars, or Pumas | 800         |                      |
| Foxes                                | 3,800       |                      |
| Eagles                               | 5,300       |                      |
| Bobcats                              | 11,700      |                      |
| All Other Animals <sup>2</sup>       | 7,000       |                      |
| 3-State Total <sup>3</sup>           | 61,000      | 3,355                |

<sup>1</sup> Goat value per head is based on a two-year straight average of the value of all goats reported in the January 1 Sheep Survey from 1999 to 2000.

<sup>2</sup> Other predators include bears, wolves, ravens, vultures, and other animals.

<sup>3</sup> AZ, NM, and TX.

**Non-Lethal Methods Used to Prevent Losses of Sheep and Lambs to Predators,  
by State and United States, 1999**

| State                   | Fencing        | Guard Dogs     | Llamas         | Donkeys        | Lamb Shed      |
|-------------------------|----------------|----------------|----------------|----------------|----------------|
|                         | <i>Percent</i> | <i>Percent</i> | <i>Percent</i> | <i>Percent</i> | <i>Percent</i> |
| AZ                      | 21.7           | 23.2           | 60.9           | 6.0            | 23.8           |
| CA                      | 69.1           | 21.6           | 12.4           | 5.2            | 56.1           |
| CO                      | 31.3           | 23.0           | 9.1            | 3.4            | 66.6           |
| ID                      | 46.4           | 55.2           | 9.9            | 2.5            | 45.5           |
| IL                      | 38.0           | 18.8           | 6.7            | 5.6            | 68.3           |
| IN                      | 29.9           | 27.8           | 5.2            | 3.9            | 57.4           |
| IA                      | 25.9           | 38.4           | 20.9           | 8.1            | 28.1           |
| KS                      | 64.5           | 27.2           | 3.2            | 7.5            | 82.8           |
| MI                      | 67.6           | 37.1           | 18.6           | 5.2            | 45.2           |
| MN                      | 66.8           | 41.4           | 4.4            | 5.5            | 53.7           |
| MO                      | 44.3           | 56.3           | 5.2            | 9.1            | 26.0           |
| MT                      | 36.0           | 27.5           | 22.7           | 15.1           | 65.6           |
| NE                      | 50.0           | 24.2           | 10.9           | 0.5            | 68.5           |
| NV                      | 47.3           | 50.7           | 8.3            | 2.8            | 57.0           |
| N ENG <sup>1</sup>      | 78.3           | 16.3           | 3.9            | 7.3            | 19.6           |
| NM                      | 83.9           | 8.4            | 70.4           | 1.9            | 78.6           |
| NY                      | 77.6           | 16.2           | 15.2           | 14.7           | 45.3           |
| ND                      | 45.6           | 42.8           | 8.6            | 19.7           | 45.5           |
| OH                      | 73.9           | 15.6           | 5.1            | 6.5            | 40.5           |
| OK                      | 46.2           | 49.3           | 9.0            | 10.2           | 17.6           |
| OR                      | 61.9           | 27.2           | 37.4           | 2.1            | 49.9           |
| PA                      | 72.0           | 14.9           | 3.4            | 2.8            | 49.5           |
| SD                      | 10.4           | 22.7           | 5.9            | 21.6           | 41.6           |
| TX                      | 46.7           | 34.6           | 6.1            | 24.4           | 29.8           |
| UT                      | 53.6           | 28.5           | 7.4            | 2.3            | 46.5           |
| VA                      | 69.1           | 32.2           | 15.7           | 25.1           | 43.5           |
| WA                      | 82.6           | 39.3           | 14.3           | 1.3            | 60.6           |
| WV                      | 58.7           | 13.9           | 5.3            | 16.8           | 35.5           |
| WI                      | 73.2           | 12.1           | 6.4            | 3.5            | 49.5           |
| WY                      | 27.0           | 36.0           | 20.0           | 7.9            | 55.7           |
| Oth<br>Sts <sup>2</sup> | 67.0           | 32.5           | 14.4           | 15.4           | 32.5           |
| US                      | 57.0           | 28.2           | 13.2           | 9.0            | 46.0           |

<sup>1</sup> N ENG includes CT, ME, MA, NH, RI, and VT.

<sup>2</sup> Other States include AL, AK, AR, DE, FL, GA, HI, KY, LA, MD, MS, NJ, NC, SC, and TN.



**Non-Lethal Methods Used to Prevent Losses of Sheep and Lambs to Predators,  
by State and United States, 1999**

| State                   | Herding        | Night Penning  | Fright Tactics | Other          |
|-------------------------|----------------|----------------|----------------|----------------|
|                         | <i>Percent</i> | <i>Percent</i> | <i>Percent</i> | <i>Percent</i> |
| AZ                      | 8.7            | 20.4           | 6.3            | 0.3            |
| CA                      | 8.4            | 54.0           | 7.3            | 11.5           |
| CO                      | 7.1            | 79.4           | 5.6            | 3.6            |
| ID                      | 11.3           | 50.2           | 7.3            | 0.8            |
| IL                      | 3.2            | 58.1           | 1.5            | 4.1            |
| IN                      | 7.2            | 36.4           | 0.6            | 15.9           |
| IA                      | 3.2            | 43.8           | 2.8            | 2.5            |
| KS                      | 1.6            | 80.0           | 10.9           | 18.0           |
| MI                      | 1.1            | 36.6           | 3.3            | 2.3            |
| MN                      | 3.4            | 37.0           | 15.3           | 0.6            |
| MO                      | 2.6            | 50.2           | 1.1            | 2.9            |
| MT                      | 12.9           | 44.4           | 3.3            | 1.2            |
| NE                      | 14.8           | 43.4           | 5.0            | 7.0            |
| NV                      | 7.5            | 52.1           | 1.4            | 1.4            |
| N ENG <sup>1</sup>      | 2.9            | 24.2           | 3.1            | 7.8            |
| NM                      | 5.0            | 86.0           | 3.6            | 2.2            |
| NY                      | 11.1           | 49.2           | 5.6            | 13.6           |
| ND                      | 9.2            | 49.5           | 14.6           | 6.8            |
| OH                      | 0.6            | 13.9           | 4.0            | 8.8            |
| OK                      | 0.2            | 59.7           | 3.3            | 2.9            |
| OR                      | 4.3            | 28.1           | 5.4            | 2.0            |
| PA                      | 0.6            | 33.9           | 1.2            | 2.0            |
| SD                      | 1.7            | 50.6           | 1.3            | 5.3            |
| TX                      | 9.3            | 35.0           | 9.2            | 7.3            |
| UT                      | 11.9           | 34.4           | 5.8            | 0.9            |
| VA                      | 21.4           | 36.5           | 8.6            | 9.2            |
| WA                      | 14.8           | 60.9           | 4.7            | 0.0            |
| WV                      | 7.0            | 40.2           | 2.9            | 8.6            |
| WI                      | 3.3            | 29.3           | 0.5            | 1.1            |
| WY                      | 13.4           | 53.5           | 9.2            | 4.0            |
| Oth<br>Sts <sup>2</sup> | 10.9           | 34.6           | 6.0            | 14.0           |
| US                      | 6.6            | 42.6           | 5.1            | 6.2            |

<sup>1</sup> N ENG includes CT, ME, MA, NH, RI, and VT.

<sup>2</sup> Other States include AL, AK, AR, DE, FL, GA, HI, KY, LA, MD, MS, NJ, NC, SC, and TN.

## Reliability of Sheep and Goat Predator Loss Estimates

**Survey Procedures:** A random sample of U.S. producers was surveyed to provide data for these estimates. Survey procedures ensured that all sheep producers, regardless of size, had a chance to be included in the survey. Large producers were sampled more heavily than small operations. About 13,800 operators were contacted during the first half of January by mail, telephone and face-to-face personal interview.

**Estimation Procedures:** Total death losses from all causes for sheep and lambs were as reported in "*Meat Animals, Production, Disposition, and Income - 2000*" (released April 27, 2000).

In setting the predator loss estimates, first total predator losses were estimated as a percent of total losses, then specific predator losses were estimated as a percent of total predator losses.

**Revision Policy:** Revisions to previous estimates are made to improve the current estimate. Previous year estimates are subject to revision when current estimates are made. Estimates for losses from all causes are subject to revision in next year's "*Meat Animals, Production, Disposition, and Income*". No revision to predator losses is planned.

The United States Department of Agriculture (USDA) prohibits discrimination in all its programs on the basis of race, color, national origin, gender, religion, age, disability, political beliefs, sexual orientation, and marital or family status. (Not all prohibited bases apply to all programs.) Persons with disabilities who require alternative means for communication of program information (braille, large print, audiotape, etc.) should contact the USDA's TARGET Center at 202-720-2600 (voice and TDD).

To file a complaint of discrimination, write USDA, Director, Office of Civil Rights, Room 326-W, Whitten Building, 14th and Independence Avenue, SW, Washington, D.C., 20250-9410, or call 202-720-5964 (voice or TDD). USDA is an equal opportunity provider and employer.

## ACCESS TO REPORTS!!

---

For your convenience, there are several ways to obtain NASS reports, data products, and services:

### INTERNET ACCESS

All NASS reports are available free of charge on the worldwide Internet. For access, connect to the Internet and go to the NASS Home Page at: <http://www.usda.gov/nass/>. Select "Today's Reports" or Publications and then Reports by Calendar or Publications and then Search, by Title or Subject.

### E-MAIL SUBSCRIPTION

There are two options for subscribing via e-mail. All NASS reports are available by subscription free of charge direct to your e-mail address. 1) Starting with the NASS Home Page at <http://www.usda.gov/nass/>, click on **Publications**, then click on the **Subscribe by E-mail** button which takes you to the page describing e-mail delivery of reports. Finally, click on **Go to the Subscription Page** and follow the instructions. 2) If you do NOT have Internet access, send an e-mail message to: [usda-reports@usda.mannlib.cornell.edu](mailto:usda-reports@usda.mannlib.cornell.edu). In the body of the message type the word: **list**.

### AUTOFAX ACCESS

NASSFax service is available for some reports from your fax machine. Please call 202-720-2000, using the handset attached to your fax. Respond to the voice prompts. Document 0411 is a list of available reports.

---

### PRINTED REPORTS OR DATA PRODUCTS

CALL OUR TOLL-FREE ORDER DESK: 800-999-6779 (U.S. and Canada)  
Other areas, please call 703-834-0125 FAX: 703-834-0110  
(Visa, MasterCard, check, or money order acceptable for payment.)

---

### ASSISTANCE

For **assistance** with general agricultural statistics or further information about NASS or its products or services, contact the **Agricultural Statistics Hotline** at **800-727-9540**, 7:30 a.m. to 4:00 p.m. ET, or e-mail: [nass@nass.usda.gov](mailto:nass@nass.usda.gov).
