# Supplementary material for: The Elephant in the room: What can we learn from California regarding the use of sport hunting of pumas (Puma concolor) as a management tool?
Source: PLOS journal article supplement (doi:10.1371/journal.pone.0224638), 2020-02-13
Supplement: S3 (10.1371/journal.pone.0224638.s003) [file journal.pone.0224638.s003]

# Cattle Predator Loss

Released May 4, 2001, by the National Agricultural Statistics Service (NASS), Agricultural Statistics Board, U.S. Department of Agriculture. For information on "Cattle Predator Loss" call Steve Anderson at 202-720-3040, office hours 7:00 a.m. to 4:00 p.m. ET.

## U.S. Cattle and Calves Predator Loss

**Cattle and calf** losses from animal predators in the United States totaled 147,000 head during 2000. This estimate excludes Alaska. This resulted in a loss to farmers and ranchers of \$51.6 million due to predators.

Coyotes caused the majority of cattle and calf losses to predators. They accounted for 64.6 percent of the total head lost. Dogs were the second leading cause of predator losses, accounting for 17.7 percent.

Use of non-lethal predator controls is also highlighted in this publication. Farmers and ranchers throughout the United States spent \$184.9 million on non-lethal methods to prevent predator loss of cattle and calves.

This report is released as a cooperative effort between the National Agricultural Statistics Service and Animal and Plant Health Inspection Service - Wildlife Services.

**Losses of Cattle and Calves: Number of Head and Total Value, United States, 2000 <sup>1</sup>**

| Predator                              | Number of Head | % of Total Predators | Total Value          |
|---------------------------------------|----------------|----------------------|----------------------|
|                                       | <i>Number</i>  | <i>Percent</i>       | <i>1,000 Dollars</i> |
| Coyotes                               | 95,000         | 64.6                 | 31,754               |
| Dogs                                  | 26,000         | 17.7                 | 9,547                |
| Mountain Lions & Bobcats <sup>2</sup> | 11,000         | 7.5                  | 4,334                |
| Bears                                 | 2,800          | 1.9                  | 1,804                |
| Wolves                                | 1,600          | 1.1                  | 1,030                |
| All Other Animals                     | 10,600         | 7.2                  | 3,168                |
| US                                    | 147,000        | 100.0                | 51,637               |

<sup>1</sup> Totals may not add due to rounding. Cattle includes all cows, bulls, steers, and heifers weighing over 500 pounds. This includes beef and milk breeds as well as cattle on feed. Calves include beef and milk breed steers, heifers, and bulls weighing less than 500 pounds.

<sup>2</sup> Includes cougars, pumas, and lynx.

## Value of Cattle and Calves Lost from Predators U.S., 2000

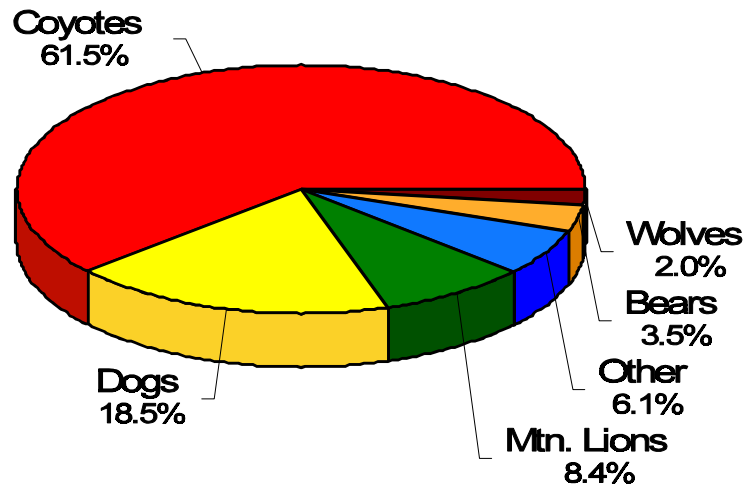

**Losses of Cattle and Calves by Predators, Total by State  
and United States, 2000 <sup>1</sup>**

| State | Cattle      | Percent of U.S. | Calves      | Percent of U.S. |
|-------|-------------|-----------------|-------------|-----------------|
|       | <i>Head</i> | <i>Percent</i>  | <i>Head</i> | <i>Percent</i>  |
| AL    | 800         | 3.8             | 3,700       | 2.9             |
| AZ    | 500         | 2.4             | 3,200       | 2.5             |
| AR    | 500         | 2.4             | 2,800       | 2.2             |
| CA    | 2,400       | 11.4            | 12,500      | 9.9             |
| CO    | 500         | 2.4             | 3,000       | 2.4             |
| CT    |             |                 |             |                 |
| DE    |             |                 |             |                 |
| FL    | 600         | 2.9             | 2,500       | 2.0             |
| GA    | 500         | 2.4             | 5,400       | 4.3             |
| HI    | 1,500       | 7.1             | 700         | 0.6             |
| ID    | 300         | 1.4             | 2,300       | 1.8             |
| IL    | 800         | 3.8             | 2,100       | 1.7             |
| IN    | 200         | 1.0             | 1,300       | 1.0             |
| IA    | 100         | 0.5             | 1,100       | 0.9             |
| KS    | 300         | 1.4             | 3,700       | 2.9             |
| KY    | 800         | 3.8             | 2,200       | 1.7             |
| LA    | 300         | 1.4             | 1,500       | 1.2             |
| ME    |             |                 |             |                 |
| MD    |             |                 |             |                 |
| MA    |             |                 |             |                 |
| MI    |             |                 | 300         | 0.2             |
| MN    | 100         | 0.5             | 1,100       | 0.9             |
| MS    | 200         | 1.0             | 3,800       | 3.0             |
| MO    | 1,000       | 4.8             | 3,100       | 2.5             |
| MT    | 600         | 2.9             | 3,200       | 2.5             |
| NE    |             |                 | 2,200       | 1.7             |
| NV    | 300         | 1.4             | 1,500       | 1.2             |
| NH    |             |                 |             |                 |
| NJ    |             |                 |             |                 |
| NM    | 700         | 3.3             | 5,000       | 4.0             |
| NY    | 100         | 0.5             | 1,200       | 1.0             |
| NC    | 500         | 2.4             | 2,100       | 1.7             |
| ND    | 200         | 1.0             | 1,300       | 1.0             |
| OH    |             |                 | 600         | 0.5             |
| OK    | 700         | 3.3             | 6,800       | 5.4             |
| OR    | 300         | 1.4             | 4,100       | 3.3             |
| PA    |             |                 |             |                 |
| RI    |             |                 |             |                 |
| SC    | 200         | 1.0             | 900         | 0.7             |
| SD    | 400         | 1.9             | 2,600       | 2.1             |
| TN    | 400         | 1.9             | 4,100       | 3.3             |
| TX    | 2,800       | 13.3            | 22,000      | 17.5            |
| UT    | 400         | 1.9             | 2,100       | 1.7             |
| VT    |             |                 |             |                 |
| VA    | 600         | 2.9             | 2,300       | 1.8             |
| WA    | 600         | 2.9             | 1,600       | 1.3             |
| WV    |             |                 | 900         | 0.7             |
| WI    | 200         | 1.0             | 1,200       | 1.0             |
| WY    | 300         | 1.4             | 3,600       | 2.9             |
| Unpub | 300         | 1.4             | 400         | 0.3             |
| US    | 21,000      | 100.0           | 126,000     | 100.0           |

<sup>1</sup> Missing data are less than 100 head for the State or not published to avoid disclosure of individual operations. This data is included in Unpublished States and in United States. Totals may not add due to rounding.

**Losses of Cattle and Calves by Coyotes and Dogs, by State and  
United States, 2000 <sup>1</sup>**

| State | Coyotes     |                        |             |                        | Dogs        |                        |             |                        |
|-------|-------------|------------------------|-------------|------------------------|-------------|------------------------|-------------|------------------------|
|       | Cattle      | % of<br>Total<br>Pred. | Calves      | % of<br>Total<br>Pred. | Cattle      | % of<br>Total<br>Pred. | Calves      | % of<br>Total<br>Pred. |
|       | <i>Head</i> | <i>Percent</i>         | <i>Head</i> | <i>Percent</i>         | <i>Head</i> | <i>Percent</i>         | <i>Head</i> | <i>Percent</i>         |
| AL    | 500         | 62.5                   | 2,500       | 67.6                   | 100         | 12.5                   | 1,100       | 29.7                   |
| AZ    |             |                        | 1,600       | 50.0                   | 200         | 40.0                   | 300         | 9.4                    |
| AR    | 200         | 40.0                   | 1,600       | 57.1                   | 200         | 40.0                   | 500         | 17.9                   |
| CA    | 900         | 37.5                   | 8,100       | 64.8                   | 400         | 16.7                   | 1,500       | 12.0                   |
| CO    | 200         | 40.0                   | 2,600       | 86.7                   |             |                        | 100         | 3.3                    |
| CT    |             |                        |             |                        |             |                        |             |                        |
| DE    |             |                        |             |                        |             |                        |             |                        |
| FL    | 100         | 16.7                   | 1,300       | 52.0                   | 200         | 33.3                   | 900         | 36.0                   |
| GA    | 200         | 40.0                   | 3,500       | 64.8                   | 200         | 40.0                   | 1,700       | 31.5                   |
| HI    |             |                        |             |                        | 100         | 6.7                    | 100         | 14.3                   |
| ID    | 100         | 33.3                   | 1,600       | 69.6                   |             |                        | 100         | 4.3                    |
| IL    | 100         | 12.5                   | 1,100       | 52.4                   | 400         | 50.0                   | 900         | 42.9                   |
| IN    | 100         | 50.0                   | 1,000       | 76.9                   | 100         | 50.0                   | 200         | 15.4                   |
| IA    |             |                        | 900         | 81.8                   |             |                        | 200         | 18.2                   |
| KS    | 200         | 66.7                   | 2,900       | 78.4                   |             |                        | 500         | 13.5                   |
| KY    | 500         | 62.5                   | 1,400       | 63.6                   | 200         | 25.0                   | 600         | 27.3                   |
| LA    | 200         | 66.7                   | 1,100       | 73.3                   |             |                        | 300         | 20.0                   |
| ME    |             |                        |             |                        |             |                        |             |                        |
| MD    |             |                        |             |                        |             |                        |             |                        |
| MA    |             |                        |             |                        |             |                        |             |                        |
| MI    |             |                        | 200         | 66.7                   |             |                        |             |                        |
| MN    |             |                        | 400         | 36.4                   |             |                        | 100         | 9.1                    |
| MS    |             |                        | 2,700       | 71.1                   | 100         | 50.0                   | 1,100       | 28.9                   |
| MO    |             |                        | 2,100       | 67.7                   | 800         | 80.0                   | 900         | 29.0                   |
| MT    | 200         | 33.3                   | 2,300       | 71.9                   |             |                        | 100         | 3.1                    |
| NE    |             |                        | 2,100       | 95.5                   |             |                        |             |                        |
| NV    | 200         | 66.7                   | 1,400       | 93.3                   |             |                        |             |                        |
| NH    |             |                        |             |                        |             |                        |             |                        |
| NJ    |             |                        |             |                        |             |                        |             |                        |
| NM    | 200         | 28.6                   | 4,000       | 80.0                   | 100         | 14.3                   | 200         | 4.0                    |
| NY    |             |                        | 900         | 75.0                   |             |                        |             |                        |
| NC    | 200         | 40.0                   | 500         | 23.8                   | 300         | 60.0                   | 800         | 38.1                   |
| ND    | 200         | 100.0                  | 1,300       | 100.0                  |             |                        |             |                        |
| OH    |             |                        | 500         | 83.3                   |             |                        |             |                        |
| OK    | 200         | 28.6                   | 3,800       | 55.9                   | 400         | 57.1                   | 2,200       | 32.4                   |
| OR    | 100         | 33.3                   | 3,200       | 78.0                   |             |                        | 200         | 4.9                    |
| PA    |             |                        |             |                        |             |                        |             |                        |
| RI    |             |                        |             |                        |             |                        |             |                        |
| SC    | 100         | 50.0                   | 300         | 33.3                   |             |                        | 600         | 66.7                   |
| SD    | 400         | 100.0                  | 2,500       | 96.2                   |             |                        |             |                        |
| TN    | 300         | 75.0                   | 2,900       | 70.7                   |             |                        | 1,200       | 29.3                   |
| TX    | 1,800       | 64.3                   | 17,000      | 77.3                   | 300         | 10.7                   | 3,100       | 14.1                   |
| UT    | 200         | 50.0                   | 1,800       | 85.7                   |             |                        |             |                        |
| VT    |             |                        |             |                        |             |                        |             |                        |
| VA    | 100         | 16.7                   | 1,000       | 43.5                   | 400         | 66.7                   | 1,100       | 47.8                   |
| WA    |             |                        | 700         | 43.8                   | 100         | 16.7                   | 200         | 12.5                   |
| WV    |             |                        | 700         | 77.8                   |             |                        |             |                        |
| WI    | 100         | 50.0                   | 400         | 33.3                   | 100         | 50.0                   |             |                        |
| WY    | 100         | 33.3                   | 2,800       | 77.8                   |             |                        |             |                        |
| Unpub | 300         |                        | 300         |                        | 300         |                        | 200         |                        |
| US    | 8,000       | 38.1                   | 87,000      | 69.0                   | 5,000       | 23.8                   | 21,000      | 16.7                   |

<sup>1</sup> Missing data are less than 100 head for the State or not published to avoid disclosure of individual operations. This data is included in Unpublished States and in United States. Totals may not add due to rounding.

**Losses of Cattle and Calves by Mountain Lions and Bobcats  
by Selected States and United States, 2000<sup>1 2</sup>**

| State              | Mountain Lions and Bobcats |                                  |             |                                  |
|--------------------|----------------------------|----------------------------------|-------------|----------------------------------|
|                    | Cattle                     | Percent of<br>Total<br>Predators | Calves      | Percent of<br>Total<br>Predators |
|                    | <i>Head</i>                | <i>Percent</i>                   | <i>Head</i> | <i>Percent</i>                   |
| AZ                 | 200                        | 40.0                             | 1,100       | 34.4                             |
| AR                 |                            |                                  | 100         | 3.6                              |
| CA                 | 900                        | 37.5                             | 2,400       | 19.2                             |
| CO                 | 200                        | 40.0                             | 100         | 3.3                              |
| ID                 | 100                        | 33.3                             | 300         | 13.0                             |
| KS                 |                            |                                  | 200         | 5.4                              |
| MO                 | 100                        | 10.0                             |             |                                  |
| MT                 |                            |                                  | 100         | 3.1                              |
| NV                 | 100                        | 33.3                             |             |                                  |
| NM                 | 300                        | 42.9                             | 700         | 14.0                             |
| NC                 |                            |                                  | 100         | 4.8                              |
| OK                 | 100                        | 14.3                             | 300         | 4.4                              |
| OR                 | 100                        | 33.3                             | 500         | 12.2                             |
| TX                 | 100                        | 3.6                              | 300         | 1.4                              |
| UT                 | 100                        | 25.0                             | 200         | 9.5                              |
| VA                 |                            |                                  | 100         | 4.3                              |
| WA                 | 500                        | 83.3                             | 500         | 31.3                             |
| WV                 |                            |                                  | 100         | 11.1                             |
| WY                 | 100                        | 33.3                             | 300         | 8.3                              |
| Unpub <sup>3</sup> | 100                        |                                  | 600         |                                  |
| US                 | 3,000                      | 14.3                             | 8,000       | 6.3                              |

<sup>1</sup> Missing data are less than 100 head for the State or not published to avoid disclosure of individual operations. This data is included in Unpublished States and in United States. Totals may not add due to rounding.

<sup>2</sup> Includes cougars, pumas, and lynx.

<sup>3</sup> Unpublished States may not be included in table.

**Losses of Cattle and Calves by Other Predators  
by State and United States, 2000 <sup>1</sup>**

| State | All Other Predators |                                  |             |                                  |
|-------|---------------------|----------------------------------|-------------|----------------------------------|
|       | Cattle              | Percent of<br>Total<br>Predators | Calves      | Percent of<br>Total<br>Predators |
|       | <i>Head</i>         | <i>Percent</i>                   | <i>Head</i> | <i>Percent</i>                   |
| AL    | 200                 | 25.0                             | 100         | 2.7                              |
| AZ    |                     |                                  | 200         | 6.3                              |
| AR    | 100                 | 20.0                             | 600         | 21.4                             |
| CA    | 200                 | 8.3                              | 500         | 4.0                              |
| CO    | 100                 | 20.0                             | 200         | 6.7                              |
| CT    |                     |                                  |             |                                  |
| DE    |                     |                                  |             |                                  |
| FL    | 300                 | 50.0                             | 300         | 12.0                             |
| GA    | 100                 | 20.0                             | 200         | 3.7                              |
| HI    | 1,400               | 93.3                             | 600         | 85.7                             |
| ID    | 100                 | 33.3                             | 300         | 13.0                             |
| IL    | 300                 | 37.5                             | 100         | 4.8                              |
| IN    |                     |                                  | 100         | 7.7                              |
| IA    |                     |                                  |             |                                  |
| KS    |                     |                                  | 100         | 2.7                              |
| KY    | 100                 | 12.5                             | 200         | 9.1                              |
| LA    | 100                 | 33.3                             | 100         | 6.7                              |
| ME    |                     |                                  |             |                                  |
| MD    |                     |                                  |             |                                  |
| MA    |                     |                                  |             |                                  |
| MI    |                     |                                  | 100         | 33.3                             |
| MN    |                     |                                  | 600         | 54.5                             |
| MS    |                     |                                  |             |                                  |
| MO    | 100                 | 10.0                             |             |                                  |
| MT    | 300                 | 50.0                             | 700         | 21.9                             |
| NE    |                     |                                  |             |                                  |
| NV    |                     |                                  |             |                                  |
| NH    |                     |                                  |             |                                  |
| NJ    |                     |                                  |             |                                  |
| NM    | 100                 | 14.3                             | 100         | 2.0                              |
| NY    |                     |                                  |             |                                  |
| NC    |                     |                                  | 700         | 33.3                             |
| ND    |                     |                                  |             |                                  |
| OH    |                     |                                  |             |                                  |
| OK    |                     |                                  | 500         | 7.4                              |
| OR    | 100                 | 33.3                             | 200         | 4.9                              |
| PA    |                     |                                  |             |                                  |
| RI    |                     |                                  |             |                                  |
| SC    |                     |                                  |             |                                  |
| SD    |                     |                                  |             |                                  |
| TN    |                     |                                  |             |                                  |
| TX    | 600                 | 21.4                             | 1,600       | 7.3                              |
| UT    | 100                 | 25.0                             |             |                                  |
| VT    |                     |                                  |             |                                  |
| VA    | 100                 | 16.7                             | 100         | 4.3                              |
| WA    |                     |                                  | 200         | 12.5                             |
| WV    |                     |                                  | 100         | 11.1                             |
| WI    |                     |                                  | 600         | 50.0                             |
| WY    | 100                 | 33.3                             | 500         | 13.9                             |
| Unpub | 500                 |                                  | 400         |                                  |
| US    | 5,000               | 23.8                             | 10,000      | 7.9                              |

<sup>1</sup> Missing data are less than 100 head for the State or not published to avoid disclosure of individual operations. This data is included in Unpublished States and in United States. Totals may not add due to rounding.

**Losses of Cattle and Calves from Predators: Total Value per Head  
and Total Value, by State and United States, 2000 <sup>1</sup>**

| State           | Value per Head      |                     | Total Value          |                      |
|-----------------|---------------------|---------------------|----------------------|----------------------|
|                 | Cattle <sup>2</sup> | Calves <sup>3</sup> | Cattle               | Calves               |
|                 | <i>Dollars</i>      | <i>Dollars</i>      | <i>1,000 Dollars</i> | <i>1,000 Dollars</i> |
| AL              | 613.00              | 306.00              | 490                  | 1,132                |
| AZ              | 577.00              | 306.00              | 289                  | 979                  |
| AR              | 621.00              | 288.00              | 311                  | 806                  |
| CA              | 649.00              | 279.00              | 1,558                | 3,488                |
| CO              | 752.00              | 315.00              | 376                  | 945                  |
| CT              |                     |                     |                      |                      |
| DE              |                     |                     |                      |                      |
| FL              | 586.00              | 303.00              | 352                  | 758                  |
| GA              | 576.00              | 294.60              | 288                  | 1,591                |
| HI              | 401.00              | 183.00              | 602                  | 128                  |
| ID              | 706.00              | 274.80              | 212                  | 632                  |
| IL              | 697.00              | 345.00              | 558                  | 725                  |
| IN              | 704.00              | 285.00              | 141                  | 371                  |
| IA              | 783.00              | 306.00              | 78                   | 337                  |
| KS              | 732.00              | 321.00              | 220                  | 1,188                |
| KY              | 648.00              | 288.30              | 518                  | 634                  |
| LA              | 590.00              | 295.50              | 177                  | 443                  |
| ME              |                     |                     |                      |                      |
| MD              |                     |                     |                      |                      |
| MA              |                     |                     |                      |                      |
| MI              |                     | 306.00              |                      | 92                   |
| MN              | 720.00              | 284.40              | 72                   | 313                  |
| MS              | 613.00              | 282.60              | 123                  | 1,074                |
| MO              | 685.00              | 306.00              | 685                  | 949                  |
| MT              | 795.00              | 309.00              | 477                  | 989                  |
| NE              |                     | 318.00              |                      | 700                  |
| NV              | 720.00              | 336.00              | 216                  | 504                  |
| NH              |                     |                     |                      |                      |
| NJ              |                     |                     |                      |                      |
| NM              | 629.00              | 303.00              | 440                  | 1,515                |
| NY              | 714.00              | 312.00              | 71                   | 374                  |
| NC              | 613.00              | 288.60              | 307                  | 606                  |
| ND              | 809.00              | 295.80              | 162                  | 385                  |
| OH              |                     | 284.10              |                      | 170                  |
| OK              | 665.00              | 306.00              | 466                  | 2,081                |
| OR              | 668.00              | 279.00              | 200                  | 1,144                |
| PA              |                     |                     |                      |                      |
| RI              |                     |                     |                      |                      |
| SC              | 613.00              | 303.00              | 123                  | 273                  |
| SD              | 817.00              | 324.00              | 327                  | 842                  |
| TN              | 620.00              | 284.40              | 248                  | 1,166                |
| TX              | 623.00              | 321.00              | 1,744                | 7,062                |
| UT              | 720.00              | 296.70              | 288                  | 623                  |
| VT              |                     |                     |                      |                      |
| VA              | 629.00              | 300.00              | 377                  | 690                  |
| WA              | 720.00              | 290.40              | 432                  | 465                  |
| WV              |                     | 262.50              |                      | 236                  |
| WI              | 701.00              | 381.00              | 140                  | 457                  |
| WY              | 779.00              | 321.00              | 234                  | 1,156                |
| Unpub           | 740.00              | 225.00              | 222                  | 90                   |
| US <sup>4</sup> | 644.00              | 302.00              | 13,524               | 38,113               |

<sup>1</sup> Missing data are less than 100 head for the State or not published to avoid disclosure of individual operations. This data is included in Unpublished States and in United States. <sup>2</sup> Cattle value per head is based on a two-year straight average of the value of beef cows reported in the January 1 Cattle survey from 2000 and 2001. <sup>3</sup> Calf value per head is based on the market year average calf price. An average weight of 300 pounds was used in all States. <sup>4</sup> U.S. value per head rounded to the nearest dollar. U.S. and unpublished value per head are derived. Totals may not add due to rounding.

**Non-Lethal Methods Used to Prevent Losses of Cattle and Calves to Predators,  
by State and United States, 2000<sup>1 2</sup>**

| State | Guard<br>Animals | Exclusion<br>Fencing | Herding        | Night<br>Penning |
|-------|------------------|----------------------|----------------|------------------|
|       | <i>Percent</i>   | <i>Percent</i>       | <i>Percent</i> | <i>Percent</i>   |
| AL    | 40.3             | 32.8                 | 6.0            | 4.5              |
| AZ    | 28.6             | 28.6                 |                |                  |
| AR    | 55.3             | 21.1                 |                |                  |
| CA    | 19.6             | 48.0                 | 10.8           | 13.7             |
| CO    | 25.0             | 17.9                 | 7.1            | 14.3             |
| CT    | 33.3             | 33.3                 |                | 16.7             |
| DE    | 20.0             | 50.0                 |                | 20.0             |
| FL    | 24.4             | 16.7                 | 1.3            | 2.6              |
| GA    | 21.7             | 19.6                 |                |                  |
| HI    | 14.3             | 57.1                 | 7.1            |                  |
| ID    | 22.2             | 44.4                 | 8.9            | 4.4              |
| IL    | 20.0             | 57.1                 | 2.9            | 11.4             |
| IN    | 35.1             | 32.4                 | 21.9           | 14.3             |
| IA    | 13.0             | 40.7                 |                | 11.1             |
| KS    | 19.6             | 8.9                  | 5.4            | 7.1              |
| KY    | 38.5             | 26.9                 | 1.9            | 3.8              |
| LA    | 24.0             | 57.3                 | 20.0           | 20.0             |
| ME    | 26.7             | 60.0                 | 6.7            | 20.0             |
| MD    |                  |                      | 50.0           |                  |
| MA    | 24.1             | 55.2                 | 10.3           | 27.6             |
| MI    | 18.2             | 68.2                 | 4.5            | 13.6             |
| MN    | 39.4             | 40.9                 | 1.5            | 12.1             |
| MS    | 40.0             | 14.0                 | 2.0            |                  |
| MO    | 50.0             | 21.4                 | 3.6            | 7.1              |
| MT    | 22.4             | 11.9                 | 14.9           | 16.4             |
| NE    | 20.7             | 12.1                 | 5.2            | 20.7             |
| NV    | 16.7             | 66.7                 |                | 16.7             |
| NH    | 30.8             | 38.5                 |                | 23.1             |
| NJ    | 13.3             | 26.7                 | 6.7            | 33.3             |
| NM    | 26.7             | 40.0                 | 6.7            |                  |
| NY    | 17.4             | 21.7                 | 17.4           | 17.4             |
| NC    | 7.1              | 42.9                 |                | 7.1              |
| ND    | 47.6             | 23.8                 |                | 9.5              |
| OH    | 46.4             | 35.7                 | 3.6            | 14.3             |
| OK    | 54.1             | 8.1                  |                | 5.4              |
| OR    | 19.7             | 45.1                 | 12.7           | 18.3             |
| PA    | 23.5             | 41.2                 | 5.9            | 29.4             |
| RI    | 20.0             | 60.0                 |                | 40.0             |
| SC    |                  | 75.0                 | 8.3            |                  |
| SD    | 25.0             | 7.1                  | 3.6            | 10.7             |
| TN    | 50.0             | 19.6                 | 8.9            | 1.8              |
| TX    | 39.8             | 30.5                 | 6.3            | 8.6              |
| UT    | 20.0             | 30.0                 | 30.0           |                  |
| VT    | 10.0             | 50.0                 |                | 30.0             |
| VA    | 22.0             | 29.3                 | 2.4            | 4.9              |
| WA    | 26.1             | 34.8                 |                | 8.7              |
| WV    | 26.7             | 33.3                 | 6.7            | 6.7              |
| WI    | 9.6              | 7.7                  | 1.3            | 5.1              |
| WY    | 35.4             | 20.8                 | 12.5           | 18.8             |
| US    | 27.7             | 29.9                 | 7.4            | 10.8             |

<sup>1</sup> Missing data are not published to avoid disclosure of individual operations.

<sup>2</sup> Use of multiple non-lethal methods may result in percentages summing to greater than 100.



**Non-Lethal Methods Used to Prevent Losses of Cattle and Calves to Predators,  
by State and United States, 2000<sup>1 2</sup>**

| State | Fright<br>Tactics | Livestock<br>Carcass Removal | Other<br>Non-lethal |
|-------|-------------------|------------------------------|---------------------|
|       | <i>Percent</i>    | <i>Percent</i>               | <i>Percent</i>      |
| AL    | 4.5               | 35.8                         | 16.4                |
| AZ    | 14.3              | 28.6                         |                     |
| AR    | 2.6               | 10.5                         | 26.3                |
| CA    | 7.8               | 46.1                         | 11.8                |
| CO    | 17.9              | 64.3                         | 5.4                 |
| CT    | 16.7              |                              |                     |
| DE    |                   |                              |                     |
| FL    | 6.4               | 56.4                         | 10.3                |
| GA    | 6.5               | 47.8                         | 21.7                |
| HI    | 7.1               | 14.3                         | 35.7                |
| ID    | 4.4               | 42.2                         | 8.9                 |
| IL    | 11.4              | 20.0                         | 14.3                |
| IN    | 6.8               | 41.6                         | 6.8                 |
| IA    |                   | 42.6                         | 11.1                |
| KS    | 12.5              | 51.8                         | 17.9                |
| KY    |                   | 25.0                         | 11.5                |
| LA    | 1.3               | 49.3                         | 2.7                 |
| ME    | 6.7               | 6.7                          | 6.7                 |
| MD    | 80.0              | 80.0                         | 50.0                |
| MA    | 13.8              | 24.1                         | 20.7                |
| MI    | 9.1               | 18.2                         | 4.5                 |
| MN    | 6.1               | 27.3                         | 3.0                 |
| MS    | 10.0              | 36.0                         | 10.0                |
| MO    | 14.3              | 21.4                         | 10.7                |
| MT    | 10.4              | 37.3                         | 7.5                 |
| NE    | 6.9               | 44.8                         | 13.8                |
| NV    | 16.7              | 33.3                         |                     |
| NH    |                   | 7.7                          | 30.8                |
| NJ    | 20.0              | 6.7                          | 26.7                |
| NM    |                   | 20.0                         | 13.3                |
| NY    | 8.7               | 60.9                         | 8.7                 |
| NC    |                   | 50.0                         | 7.1                 |
| ND    | 14.3              | 19.0                         | 4.8                 |
| OH    |                   | 3.6                          | 3.6                 |
| OK    | 8.1               | 27.0                         | 10.8                |
| OR    | 9.9               | 40.8                         | 11.3                |
| PA    |                   | 29.4                         | 5.9                 |
| RI    |                   |                              |                     |
| SC    |                   | 8.3                          | 8.3                 |
| SD    | 10.7              | 57.1                         | 7.1                 |
| TN    | 7.1               | 41.1                         | 8.9                 |
| TX    | 3.1               | 21.9                         | 18.8                |
| UT    | 30.0              | 20.0                         | 10.0                |
| VT    |                   | 10.0                         | 20.0                |
| VA    | 12.2              | 34.1                         | 12.2                |
| WA    |                   | 17.4                         | 17.4                |
| WV    | 6.7               | 13.3                         | 13.3                |
| WI    | 2.6               | 85.9                         | 6.4                 |
| WY    | 10.4              | 29.2                         | 14.6                |
| US    | 6.8               | 40.4                         | 11.3                |

<sup>1</sup> Missing data are not published to avoid disclosure of individual operations.

<sup>2</sup> Use of multiple non-lethal methods may result in percentages summing to greater than 100.

## Reliability of Cattle and Calves Predator Loss Estimates

**Survey Procedures:** A random sample of U.S. producers was surveyed to provide data for these estimates. Survey procedures ensured that all cattle producers, regardless of size, had a chance to be included in the survey. Large producers were sampled more heavily than small operations. About 50,000 operators were contacted during the first half of January by mail, telephone and face-to-face personal interview.

**Estimation Procedures:** These estimates of death loss by cause were prepared by the Livestock Branch, NASS, and reviewed by the 49 States involved. Total cattle and calf death losses from all causes were published in the 2001 *"Meat Animals-Production, Disposition, and Income"* (released April 27, 2001). To estimate death loss by cause, cattle and calf losses from total predators were first determined. Next, the total predator losses was calculated. All published loss estimates were rounded to the nearest 100 head. Value estimates were rounded to the nearest \$1,000. State estimates of less than 100 head are not published, but are included in U.S. totals. States were combined into regions when sampling variability did not permit individual state data to be released.

**Revision Policy:** Revisions to previous estimates are made to improve the current estimate. Previous year estimates are subject to revision when current estimates are made. Estimates for losses from all causes are subject to revision in next year's *"Meat Animals-Production, Disposition, and Income"*. No revision to predator losses is planned.

**Reliability:** Since all cattle operators are not included in the sample, survey estimates are subject to sampling variability. Survey results are also subject to non-sampling errors such as omissions, duplications, and mistakes in reporting, recording, and processing the data. The effects of these non-sampling errors cannot be measured directly. They are minimized through rigid quality controls in the data collection process and through a careful review of all reported data for consistency and reasonableness.

The United States Department of Agriculture (USDA) prohibits discrimination in all its programs on the basis of race, color, national origin, gender, religion, age, disability, political beliefs, sexual orientation, and marital or family status. (Not all prohibited bases apply to all programs.) Persons with disabilities who require alternative means for communication of program information (braille, large print, audiotape, etc.) should contact the USDA's TARGET Center at 202-720-2600 (voice and TDD).

To file a complaint of discrimination, write USDA, Director, Office of Civil Rights, Room 326-W, Whitten Building, 14th and Independence Avenue, SW, Washington, D.C., 20250-9410, or call 202-720-5964 (voice or TDD). USDA is an equal opportunity provider and employer.

## **ACCESS TO REPORTS!!**

---

For your convenience, there are several ways to obtain NASS reports, data products, and services:

### **INTERNET ACCESS**

All NASS reports are available free of charge on the worldwide Internet. For access, connect to the Internet and go to the NASS Home Page at: <http://www.usda.gov/nass/>. Select "Today's Reports" or Publications and then Reports by Calendar or Publications and then Search, by Title or Subject.

### **E-MAIL SUBSCRIPTION**

There are two options for subscribing via e-mail. All NASS reports are available by subscription free of charge direct to your e-mail address. 1) Starting with the NASS Home Page at <http://www.usda.gov/nass/>, click on **Publications**, then click on the **Subscribe by E-mail** button which takes you to the page describing e-mail delivery of reports. Finally, click on **Go to the Subscription Page** and follow the instructions. 2) If you do NOT have Internet access, send an e-mail message to: [usda-reports@usda.mannlib.cornell.edu](mailto:usda-reports@usda.mannlib.cornell.edu). In the body of the message type the word: **list**.

### **AUTOFAX ACCESS**

NASSFax service is available for some reports from your fax machine. Please call 202-720-2000, using the handset attached to your fax. Respond to the voice prompts. Document 0411 is a list of available reports.

### **----- PRINTED REPORTS OR DATA PRODUCTS**

**CALL OUR TOLL-FREE ORDER DESK: 800-999-6779 (U.S. and Canada)**  
**Other areas, please call 703-834-0125      FAX: 703-834-0110**  
**(Visa, MasterCard, check, or money order acceptable for payment.)**  
**-----**

### **ASSISTANCE**

For **assistance** with general agricultural statistics or further information about NASS or its products or services, contact the **Agricultural Statistics Hotline** at **800-727-9540**, 7:30 a.m. to 4:00 p.m. ET, or e-mail: [nass@nass.usda.gov](mailto:nass@nass.usda.gov).
