# Supplementary material for: The Elephant in the room: What can we learn from California regarding the use of sport hunting of pumas (Puma concolor) as a management tool?
Source: PLOS journal article supplement (doi:10.1371/journal.pone.0224638), 2020-02-13
Supplement: S3 (10.1371/journal.pone.0224638.s003) [file journal.pone.0224638.s003]

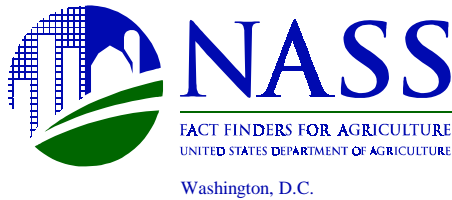

# Sheep and Goats Death Loss

---

Released May 6, 2005, by the National Agricultural Statistics Service (NASS), Agricultural Statistics Board, U.S. Department of Agriculture. For information on *Sheep and Goats Death Loss* call Scott Hollis at 202-720-4751, office hours 7:30 a.m. to 4:30 p.m. ET.

## Sheep and Lamb Death Losses

**Sheep and lamb** losses from animal predators and non-predator causes in the United States totaled 600,300. This report provides detailed breakouts of sheep and lamb losses after docking by predators and non-predator causes, as well as data on non-lethal predator control measures.

Sheep and lamb losses from animal predators totaled 224,200. This represented 37.3 percent of the total losses from all causes and resulted in a loss of \$18.3 million to farmers and ranchers. Coyotes and dogs caused the majority of sheep and lamb losses accounting for 60.5 percent and 13.3 percent respectively.

Sheep and lamb losses from non-predator causes totaled 376,100 or 62.7 percent of the total losses. Respiratory problems was the leading cause of non-predator deaths accounting for 17.5 percent, followed by digestive problems at 17.1 percent.

Farmers and ranchers throughout the United States spent 9.8 million dollars on non-lethal methods to control predators. Fencing was the most frequently used method at 52.5 percent. Night penning, guard dogs, and lamb sheds were the next most commonly used methods of preventing sheep and lamb losses at 32.9 percent, 31.8 percent, and 30.8 percent respectively.

A total of 415,200 **goats and kids** were lost in 2004. Diseases and other known causes accounted for 180,000 deaths or 43.4 percent of the total deaths. Predators accounted for 155,000 deaths or 37.3 percent of the total while the remainder of goat and kid losses at 80,200 or 19.3 percent resulted from unknown causes.

This report is released as a cooperative effort between the National Agricultural Statistics Service and Animal and Plant Health Inspection Service - Wildlife Services and Veterinary Services.

## Contents

## Page

|                                                                              |    |
|------------------------------------------------------------------------------|----|
| Number and Value of Losses of Sheep and Lambs .....                          | 1  |
| Losses of Sheep and Lambs by Predators .....                                 | 4  |
| Losses of Sheep and Lambs from Non-Predator Causes .....                     | 8  |
| Non-Lethal Prevention Methods .....                                          | 14 |
| Losses of Goats and Kids .....                                               | 17 |
| Reliability of Sheep and Goat Predator and Non-Predator Loss Estimates ..... | 18 |

**Losses of Sheep and Lambs from Predators: Number of Head  
and Total Value, United States, 2004**

| Predator                             | Number<br>of Head | % of Total<br>Predators | Total<br>Value       |
|--------------------------------------|-------------------|-------------------------|----------------------|
|                                      | <i>Number</i>     | <i>Percent</i>          | <i>1,000 Dollars</i> |
| Coyotes                              | 135,600           | 60.5                    | 10,707               |
| Dogs                                 | 29,800            | 13.3                    | 2,807                |
| Mountain Lions,<br>Cougars, or Pumas | 12,700            | 5.7                     | 1,101                |
| Bears                                | 8,500             | 3.8                     | 769                  |
| Foxes                                | 4,200             | 1.9                     | 285                  |
| Eagles                               | 6,300             | 2.8                     | 438                  |
| Bobcats                              | 11,100            | 4.9                     | 814                  |
| All Other Predators                  | 16,000            | 7.1                     | 1,376                |
| US                                   | 224,200           | 100.0                   | 18,297               |

**Losses of Sheep and Lambs from Non-Predators: Number of Head  
and Total Value, United States, 2004**

| Non-Predator         | Number<br>of Head | % of Total<br>Non-Predators | Total<br>Value       |
|----------------------|-------------------|-----------------------------|----------------------|
|                      | <i>Number</i>     | <i>Percent</i>              | <i>1,000 Dollars</i> |
| Digestive Problems   | 64,250            | 17.1                        | 5,216                |
| Respiratory Problems | 65,800            | 17.5                        | 5,064                |
| Metabolic Problems   | 11,800            | 3.1                         | 1,099                |
| Other Diseases       | 17,500            | 4.7                         | 1,701                |
| Weather Related      | 39,450            | 10.5                        | 2,840                |
| Lambing Problems     | 53,400            | 14.2                        | 4,715                |
| Old Age              | 39,900            | 10.6                        | 5,181                |
| On Their Back        | 3,800             | 1.0                         | 436                  |
| Poisoning            | 10,300            | 2.7                         | 1,010                |
| Theft                | 2,400             | 0.6                         | 199                  |
| Other Non-Predator   | 19,400            | 5.2                         | 1,659                |
| Unknown Non-Predator | 48,100            | 12.8                        | 4,164                |
| US                   | 376,100           | 100.0                       | 33,284               |

**Losses of Sheep and Lambs: By All Causes, Predators and Non-Predators,  
Number by State and United States, 2004**

| State                   | All Causes  |             | Predators   |             | Non-Predators |             |
|-------------------------|-------------|-------------|-------------|-------------|---------------|-------------|
|                         | Sheep       | Lambs       | Sheep       | Lambs       | Sheep         | Lambs       |
|                         | <i>Head</i> | <i>Head</i> | <i>Head</i> | <i>Head</i> | <i>Head</i>   | <i>Head</i> |
| AZ                      | 2,000       | 2,000       | 1,500       | 500         | 500           | 1,500       |
| CA                      | 15,000      | 11,000      | 4,000       | 7,000       | 11,000        | 4,000       |
| CO                      | 5,000       | 19,000      | 2,200       | 8,000       | 2,800         | 11,000      |
| ID                      | 10,000      | 12,000      | 4,100       | 6,800       | 5,900         | 5,200       |
| IL                      | 3,000       | 6,000       | 900         | 800         | 2,100         | 5,200       |
| IN                      | 2,500       | 7,000       | 600         | 700         | 1,900         | 6,300       |
| IA                      | 6,000       | 25,000      | 500         | 1,700       | 5,500         | 23,300      |
| KS                      | 4,000       | 8,000       | 900         | 2,000       | 3,100         | 6,000       |
| KY                      | 1,400       | 3,200       | 600         | 1,300       | 800           | 1,900       |
| MD                      | 600         | 1,900       | 200         | 700         | 400           | 1,200       |
| MI                      | 3,000       | 6,000       | 400         | 800         | 2,600         | 5,200       |
| MN                      | 8,000       | 17,000      | 1,200       | 1,900       | 6,800         | 15,100      |
| MO                      | 2,500       | 7,500       | 200         | 900         | 2,300         | 6,600       |
| MT                      | 13,000      | 14,000      | 2,900       | 7,900       | 10,100        | 6,100       |
| NE                      | 4,000       | 10,000      | 500         | 1,500       | 3,500         | 8,500       |
| NV                      | 6,000       | 12,000      | 3,400       | 9,000       | 2,600         | 3,000       |
| N ENG <sup>1</sup>      | 1,000       | 2,600       | 300         | 400         | 700           | 2,200       |
| NM                      | 7,000       | 6,000       | 2,700       | 4,000       | 4,300         | 2,000       |
| NY                      | 5,000       | 6,000       | 1,300       | 1,100       | 3,700         | 4,900       |
| NC                      | 1,300       | 2,300       | 300         | 500         | 1,000         | 1,800       |
| ND                      | 4,000       | 8,000       | 700         | 3,000       | 3,300         | 5,000       |
| OH                      | 5,000       | 15,000      | 500         | 1,500       | 4,500         | 13,500      |
| OK                      | 3,000       | 8,000       | 1,000       | 2,700       | 2,000         | 5,300       |
| OR                      | 8,000       | 8,000       | 2,800       | 5,800       | 5,200         | 2,200       |
| PA                      | 4,000       | 9,000       | 600         | 1,200       | 3,400         | 7,800       |
| SD                      | 10,000      | 27,000      | 2,000       | 5,000       | 8,000         | 22,000      |
| TN                      | 1,000       | 2,000       | 600         | 1,100       | 400           | 900         |
| TX                      | 41,000      | 58,000      | 16,000      | 41,000      | 25,000        | 17,000      |
| UT                      | 11,000      | 18,000      | 5,700       | 14,800      | 5,300         | 3,200       |
| VA                      | 2,500       | 7,500       | 600         | 2,400       | 1,900         | 5,100       |
| WA                      | 3,000       | 2,000       | 900         | 1,400       | 2,100         | 600         |
| WV                      | 2,500       | 5,000       | 1,100       | 2,200       | 1,400         | 2,800       |
| WI                      | 3,000       | 10,000      | 400         | 1,200       | 2,600         | 8,800       |
| WY                      | 11,000      | 18,000      | 3,000       | 14,000      | 8,000         | 4,000       |
| Oth<br>Sts <sup>2</sup> | 6,000       | 11,000      | 1,800       | 3,000       | 4,200         | 8,000       |
| US                      | 215,300     | 385,000     | 66,400      | 157,800     | 148,900       | 227,200     |

<sup>1</sup> N ENG includes CT, ME, MA, NH, RI, and VT.

<sup>2</sup> Other States include AL, AK, AR, DE, FL, GA, HI, LA, MS, NJ, and SC. These states appear in the January Sheep and Goat report as Other States and all losses for this category in this report will pertain to these same states.

**Losses of Sheep and Lambs from Predators and Non-Predators:  
Total Value per Head and Total Value, by State and United States, 2004**

| State                   | Value per Head     |                    | Total Value<br>Predator<br>Losses |                      | Total Value<br>Non-Predator<br>Losses |                      |
|-------------------------|--------------------|--------------------|-----------------------------------|----------------------|---------------------------------------|----------------------|
|                         | Sheep <sup>1</sup> | Lambs <sup>2</sup> | Sheep                             | Lambs                | Sheep                                 | Lambs                |
|                         | <i>Dollars</i>     | <i>Dollars</i>     | <i>1,000 Dollars</i>              | <i>1,000 Dollars</i> | <i>1,000 Dollars</i>                  | <i>1,000 Dollars</i> |
| AZ                      | 145.00             | 57.00              | 218                               | 29                   | 73                                    | 86                   |
| CA                      | 129.00             | 54.00              | 516                               | 378                  | 1,419                                 | 216                  |
| CO                      | 136.00             | 91.00              | 299                               | 728                  | 381                                   | 1,001                |
| ID                      | 129.00             | 57.00              | 529                               | 388                  | 761                                   | 296                  |
| IL                      | 165.00             | 60.00              | 149                               | 48                   | 347                                   | 312                  |
| IN                      | 170.00             | 61.00              | 102                               | 43                   | 323                                   | 384                  |
| IA                      | 141.00             | 57.00              | 71                                | 97                   | 776                                   | 1,328                |
| KS                      | 127.00             | 57.00              | 114                               | 114                  | 394                                   | 342                  |
| KY                      | 160.00             | 61.00              | 96                                | 79                   | 128                                   | 116                  |
| MD                      | 142.00             | 62.00              | 28                                | 43                   | 57                                    | 74                   |
| MI                      | 143.00             | 56.00              | 57                                | 45                   | 372                                   | 291                  |
| MN                      | 129.00             | 57.00              | 155                               | 108                  | 877                                   | 861                  |
| MO                      | 133.00             | 61.00              | 27                                | 55                   | 306                                   | 403                  |
| MT                      | 124.00             | 67.00              | 360                               | 529                  | 1,252                                 | 409                  |
| NE                      | 142.00             | 59.00              | 71                                | 89                   | 497                                   | 502                  |
| NV                      | 129.00             | 59.00              | 439                               | 531                  | 335                                   | 177                  |
| N ENG <sup>3</sup>      | 222.00             | 75.00              | 67                                | 30                   | 155                                   | 165                  |
| NM                      | 111.00             | 60.00              | 300                               | 240                  | 477                                   | 120                  |
| NY                      | 150.00             | 68.00              | 195                               | 75                   | 555                                   | 333                  |
| NC                      | 140.00             | 63.00              | 42                                | 32                   | 140                                   | 113                  |
| ND                      | 125.00             | 62.00              | 88                                | 186                  | 413                                   | 310                  |
| OH                      | 150.00             | 59.00              | 75                                | 89                   | 675                                   | 797                  |
| OK                      | 145.00             | 58.00              | 145                               | 157                  | 290                                   | 307                  |
| OR                      | 116.00             | 57.00              | 325                               | 331                  | 603                                   | 125                  |
| PA                      | 146.00             | 69.00              | 88                                | 83                   | 496                                   | 538                  |
| SD                      | 129.00             | 69.00              | 258                               | 345                  | 1,032                                 | 1,518                |
| TN                      | 137.00             | 61.00              | 82                                | 67                   | 55                                    | 55                   |
| TX                      | 100.00             | 66.00              | 1,600                             | 2,706                | 2,500                                 | 1,122                |
| UT                      | 128.00             | 58.00              | 730                               | 858                  | 678                                   | 186                  |
| VA                      | 139.00             | 61.00              | 83                                | 146                  | 264                                   | 311                  |
| WA                      | 123.00             | 58.00              | 111                               | 81                   | 258                                   | 35                   |
| WV                      | 120.00             | 61.00              | 132                               | 134                  | 168                                   | 171                  |
| WI                      | 162.00             | 56.00              | 65                                | 67                   | 421                                   | 493                  |
| WY                      | 120.00             | 68.00              | 360                               | 952                  | 960                                   | 272                  |
| Oth<br>Sts <sup>4</sup> | 146.00             | 58.00              | 263                               | 174                  | 613                                   | 464                  |
| US <sup>5</sup>         | 127.00             | 63.00              | 8,240                             | 10,057               | 19,051                                | 14,233               |

<sup>1</sup> Sheep value per head is based on a two-year straight average of the value of ewes reported in the January 1 Sheep Survey from 2004 to 2005.

<sup>2</sup> Lamb value per head is based on the market year average lamb price. An average lamb weight of 60 pounds was used in all States except Colorado, where a 90 pound average was used.

<sup>3</sup> N ENG includes CT, ME, MA, NH, RI, and VT.

<sup>4</sup> Other States include AL, AK, AR, DE, FL, GA, HI, LA, MS, NJ, and SC.

<sup>5</sup> US value per head is weighted between predator and non-predator losses for sheep and lambs. US value of sheep and lamb losses is the sum of state sheep and lamb losses.

**Losses of Sheep and Lambs: Number and Percent by Coyotes  
and Dogs by State and United States, 2004**

| State                   | Coyotes     |                  |             |                  | Dogs        |                  |             |                  |
|-------------------------|-------------|------------------|-------------|------------------|-------------|------------------|-------------|------------------|
|                         | Sheep       | % Total Predator | Lambs       | % Total Predator | Sheep       | % Total Predator | Lambs       | % Total Predator |
|                         | <i>Head</i> | <i>Pct</i>       | <i>Head</i> | <i>Pct</i>       | <i>Head</i> | <i>Pct</i>       | <i>Head</i> | <i>Pct</i>       |
| AZ                      | 700         | 46.7             | 400         | 80.0             | 500         | 33.3             | 100         | 20.0             |
| CA                      | 2,000       | 50.0             | 5,200       | 74.3             | 800         | 20.0             | 900         | 12.9             |
| CO                      | 1,100       | 50.0             | 5,000       | 62.5             | 200         | 9.1              | 700         | 8.8              |
| ID                      | 2,600       | 63.4             | 4,500       | 66.2             | 400         | 9.8              | 1,000       | 14.7             |
| IL                      | 300         | 33.3             | 500         | 62.5             | 300         | 33.3             |             |                  |
| IN                      | 100         | 16.7             | 400         | 57.1             | 500         | 83.3             | 300         | 42.9             |
| IA                      | 200         | 40.0             | 1,000       | 58.8             | 200         | 40.0             | 700         | 41.2             |
| KS                      | 300         | 33.3             | 1,000       | 50.0             | 500         | 55.6             | 800         | 40.0             |
| KY                      | 200         | 33.3             | 600         | 46.2             | 100         | 16.7             | 600         | 46.2             |
| MD                      |             |                  | 100         | 14.3             | 100         | 50.0             | 100         | 14.3             |
| MI                      | 200         | 50.0             | 500         | 62.5             | 100         | 25.0             | 100         | 12.5             |
| MN                      | 200         | 16.7             | 400         | 21.1             | 700         | 58.3             | 1,000       | 52.6             |
| MO                      | 100         | 50.0             | 600         | 66.7             | 100         | 50.0             | 300         | 33.3             |
| MT                      | 1,500       | 51.7             | 6,200       | 78.5             | 400         | 13.8             | 100         | 1.3              |
| NE                      | 300         | 60.0             | 1,200       | 80.0             | 100         | 20.0             | 100         | 6.7              |
| NV                      | 2,300       | 67.6             | 7,400       | 82.2             | 100         | 2.9              |             |                  |
| N ENG <sup>1</sup>      | 300         | 100.0            | 400         | 100.0            |             |                  |             |                  |
| NM                      | 1,100       | 40.7             | 2,000       | 50.0             | 900         | 33.3             |             |                  |
| NY                      | 1,000       | 76.9             | 700         | 63.6             | 200         | 15.4             | 200         | 18.2             |
| NC                      | 100         | 33.3             | 200         | 40.0             | 100         | 33.3             | 100         | 20.0             |
| ND                      | 700         | 100.0            | 2,800       | 93.3             |             |                  | 200         | 6.7              |
| OH                      | 100         | 20.0             | 700         | 46.7             | 300         | 60.0             | 300         | 20.0             |
| OK                      | 600         | 60.0             | 1,800       | 66.7             | 400         | 40.0             | 600         | 22.2             |
| OR                      | 1,400       | 50.0             | 4,300       | 74.1             | 400         | 14.3             | 300         | 5.2              |
| PA                      | 200         | 33.3             | 900         | 75.0             | 400         | 66.7             | 200         | 16.7             |
| SD                      | 1,700       | 85.0             | 3,700       | 74.0             | 100         | 5.0              | 200         | 4.0              |
| TN                      | 300         | 50.0             | 700         | 63.6             | 300         | 50.0             | 300         | 27.3             |
| TX                      | 7,500       | 46.9             | 22,000      | 53.7             | 4,500       | 28.1             | 3,000       | 7.3              |
| UT                      | 3,200       | 56.1             | 9,500       | 64.2             | 300         | 5.3              | 300         | 2.0              |
| VA                      | 400         | 66.7             | 1,700       | 70.8             | 200         | 33.3             | 300         | 12.5             |
| WA                      | 500         | 55.6             | 1,000       | 71.4             | 100         | 11.1             | 300         | 21.4             |
| WV                      | 700         | 63.6             | 1,400       | 63.6             | 300         | 27.3             | 300         | 13.6             |
| WI                      | 200         | 50.0             | 900         | 75.0             | 200         | 50.0             | 200         | 16.7             |
| WY                      | 2,100       | 70.0             | 10,500      | 75.0             | 100         | 3.3              | 300         | 2.1              |
| Oth<br>Sts <sup>2</sup> | 100         | 5.6              | 1,100       | 36.7             | 1,200       | 66.7             | 800         | 26.7             |
| US                      | 34,300      | 51.7             | 101,300     | 64.2             | 15,100      | 22.7             | 14,700      | 9.3              |

<sup>1</sup> N ENG includes CT, ME, MA, NH, RI, and VT.

<sup>2</sup> Other States include AL, AK, AR, DE, FL, GA, HI, LA, MS, NJ, and SC.

**Losses of Sheep and Lambs: Number and Percent by Mountain Lions, Cougars,  
or Pumas, and Bears by State and United States, 2004**

| State                   | Mountain Lions, Cougars, or Pumas <sup>1</sup> |                  |             |                  | Bears <sup>2</sup> |                  |             |                  |
|-------------------------|------------------------------------------------|------------------|-------------|------------------|--------------------|------------------|-------------|------------------|
|                         | Sheep                                          | % Total Predator | Lambs       | % Total Predator | Sheep              | % Total Predator | Lambs       | % Total Predator |
|                         | <i>Head</i>                                    | <i>Pct</i>       | <i>Head</i> | <i>Pct</i>       | <i>Head</i>        | <i>Pct</i>       | <i>Head</i> | <i>Pct</i>       |
| AZ                      | 200                                            | 13.3             |             |                  |                    |                  |             |                  |
| CA                      | 500                                            | 12.5             | 500         | 7.1              |                    |                  | 100         | 1.4              |
| CO                      | 200                                            | 9.1              | 100         | 1.3              | 600                | 27.3             | 1,700       | 21.3             |
| ID                      | 200                                            | 4.9              | 200         | 2.9              | 500                | 12.2             | 500         | 7.4              |
| IA                      | 100                                            | 20.0             |             |                  |                    |                  |             |                  |
| MN                      |                                                |                  |             |                  |                    |                  | 100         | 5.3              |
| MT                      |                                                |                  | 400         | 5.1              | 500                | 17.2             | 300         | 3.8              |
| NV                      | 900                                            | 26.5             | 1,200       | 13.3             |                    |                  | 200         | 2.2              |
| NM                      | 100                                            | 3.7              | 400         | 10.0             | 100                | 3.7              | 200         | 5.0              |
| NC                      | 100                                            | 33.3             | 100         | 20.0             |                    |                  |             |                  |
| OR                      | 500                                            | 17.9             | 700         | 12.1             | 100                | 3.6              |             |                  |
| SD                      |                                                |                  | 100         | 2.0              |                    |                  |             |                  |
| TX                      | 300                                            | 1.9              | 600         | 1.5              |                    |                  |             |                  |
| UT                      | 1,300                                          | 22.8             | 2,600       | 17.6             | 700                | 12.3             | 1,500       | 10.1             |
| WA                      | 200                                            | 22.2             |             |                  |                    |                  | 100         | 7.1              |
| WV                      |                                                |                  |             |                  | 100                | 9.1              | 100         | 4.5              |
| WY                      | 400                                            | 13.3             | 600         | 4.3              | 200                | 6.7              | 700         | 5.0              |
| Oth<br>Sts <sup>3</sup> |                                                |                  | 100         | 3.3              | 100                | 5.6              |             |                  |
| Unpub <sup>4</sup>      | 100                                            |                  |             |                  | 100                |                  |             |                  |
| US                      | 5,100                                          | 7.7              | 7,600       | 4.8              | 3,000              | 4.5              | 5,500       | 3.5              |

<sup>1</sup> Unpublished States include KS, NE, and SD for sheep.

<sup>2</sup> Unpublished States include CA, NV and N ENG for sheep.

<sup>3</sup> Other States include AL, AK, AR, DE, FL, GA, HI, LA, MS, NJ and SC.

<sup>4</sup> States with values that did not meet publication requirements were combined into an Unpublished States category.

**Losses of Sheep and Lambs: Number and Percent by Foxes and Eagles  
by State and United States, 2004**

| State | Foxes       |                  |             |                  | Eagles      |                  |             |                  |
|-------|-------------|------------------|-------------|------------------|-------------|------------------|-------------|------------------|
|       | Sheep       | % Total Predator | Lambs       | % Total Predator | Sheep       | % Total Predator | Lambs       | % Total Predator |
|       | <i>Head</i> | <i>Pct</i>       | <i>Head</i> | <i>Pct</i>       | <i>Head</i> | <i>Pct</i>       | <i>Head</i> | <i>Pct</i>       |
| MD    |             |                  | 100         | 14.3             |             |                  |             |                  |
| MI    |             |                  |             |                  |             |                  | 100         | 12.5             |
| MT    |             |                  | 300         | 3.8              |             |                  | 200         | 2.5              |
| NE    |             |                  |             |                  |             |                  | 200         | 13.3             |
| NM    |             |                  |             |                  | 200         | 7.4              | 400         | 10.0             |
| OR    |             |                  |             |                  |             |                  | 200         | 3.4              |
| SD    |             |                  | 200         | 4.0              |             |                  | 400         | 8.0              |
| TX    | 300         | 1.9              | 2,000       | 4.9              | 400         | 2.5              | 3,000       | 7.3              |
| UT    |             |                  | 400         | 2.7              |             |                  | 100         | 0.7              |
| VA    |             |                  |             |                  |             |                  | 200         | 8.3              |
| WV    |             |                  | 100         | 4.5              |             |                  |             |                  |
| WY    |             |                  | 800         | 5.7              | 100         | 3.3              | 800         | 5.7              |
| US    | 300         | 0.5              | 3,900       | 2.5              | 700         | 1.1              | 5,600       | 3.5              |



**Losses of Sheep and Lambs: Number and Percent by Bobcats  
and All Other Animals by State and United States, 2004**

| State                   | Bobcats <sup>1</sup> |                  |             |                  | All Other Predators <sup>2</sup> |                  |             |                  |
|-------------------------|----------------------|------------------|-------------|------------------|----------------------------------|------------------|-------------|------------------|
|                         | Sheep                | % Total Predator | Lambs       | % Total Predator | Sheep                            | % Total Predator | Lambs       | % Total Predator |
|                         | <i>Head</i>          | <i>Pct</i>       | <i>Head</i> | <i>Pct</i>       | <i>Head</i>                      | <i>Pct</i>       | <i>Head</i> | <i>Pct</i>       |
| AZ                      |                      |                  |             |                  | 100                              | 6.7              |             |                  |
| CA                      |                      |                  | 100         | 1.4              | 700                              | 17.5             | 200         | 2.9              |
| CO                      |                      |                  |             |                  | 100                              | 4.5              | 500         | 6.3              |
| ID                      |                      |                  |             |                  | 400                              | 9.8              | 600         | 8.8              |
| IL                      | 200                  | 22.2             | 200         | 25.0             | 100                              | 11.1             | 100         | 12.5             |
| KS                      |                      |                  |             |                  | 100                              | 11.1             | 200         | 10.0             |
| KY                      |                      |                  |             |                  | 300                              | 50.0             | 100         | 7.7              |
| MD                      |                      |                  |             |                  | 100                              | 50.0             | 400         | 57.1             |
| MI                      |                      |                  |             |                  | 100                              | 25.0             | 100         | 12.5             |
| MN                      |                      |                  |             |                  | 300                              | 25.0             | 400         | 21.1             |
| MT                      |                      |                  |             |                  | 500                              | 17.2             | 400         | 5.1              |
| NE                      |                      |                  |             |                  | 100                              | 20.0             |             |                  |
| NV                      |                      |                  |             |                  | 100                              | 2.9              | 200         | 2.2              |
| NM                      | 200                  | 7.4              | 1,000       | 25.0             | 100                              | 3.7              |             |                  |
| NY                      |                      |                  |             |                  | 100                              | 7.7              | 200         | 18.2             |
| NC                      |                      |                  |             |                  |                                  |                  | 100         | 20.0             |
| OH                      |                      |                  |             |                  | 100                              | 20.0             | 500         | 33.3             |
| OK                      |                      |                  | 100         | 3.7              |                                  |                  | 200         | 7.4              |
| OR                      |                      |                  |             |                  | 400                              | 14.3             | 300         | 5.2              |
| PA                      |                      |                  |             |                  |                                  |                  | 100         | 8.3              |
| SD                      |                      |                  |             |                  | 200                              | 10.0             | 400         | 8.0              |
| TN                      |                      |                  |             |                  |                                  |                  | 100         | 9.1              |
| TX                      | 1,700                | 10.6             | 7,000       | 17.1             | 1,300                            | 8.1              | 3,400       | 8.3              |
| UT                      | 100                  | 1.8              | 100         | 0.7              | 100                              | 1.8              | 300         | 2.0              |
| VA                      |                      |                  | 100         | 4.2              |                                  |                  | 100         | 4.2              |
| WA                      |                      |                  |             |                  | 100                              | 11.1             |             |                  |
| WV                      |                      |                  |             |                  |                                  |                  | 300         | 13.6             |
| WI                      |                      |                  |             |                  |                                  |                  | 100         | 8.3              |
| WY                      |                      |                  | 100         | 0.7              | 100                              | 3.3              | 200         | 1.4              |
| Oth<br>Sts <sup>3</sup> |                      |                  | 100         | 3.3              | 200                              | 11.1             | 800         | 26.7             |
| Unpub <sup>4</sup>      |                      |                  | 100         |                  |                                  |                  |             |                  |
| US                      | 2,200                | 3.3              | 8,900       | 5.6              | 5,700                            | 8.6              | 10,300      | 6.5              |

<sup>1</sup> Unpublished States include AZ, KS, NV, and SD for lambs.

<sup>2</sup> Other predators include wolves, ravens, vultures, and other animals.

<sup>3</sup> Other States include AL, AK, AR, DE, FL, GA, HI, LA, MS, NJ, and SC.

<sup>4</sup> States with values that did not meet publication requirements were combined into an Unpublished States category.

**Losses of Sheep and Lambs: Number and Percent from Digestive  
and Respiratory Problems by State and United States, 2004**

| State                   | Digestive Problems <sup>1</sup> |                     |             |                     | Respiratory Problems <sup>2</sup> |                     |             |                     |
|-------------------------|---------------------------------|---------------------|-------------|---------------------|-----------------------------------|---------------------|-------------|---------------------|
|                         | Sheep                           | % Total<br>Non-Pred | Lambs       | % Total<br>Non-Pred | Sheep                             | % Total<br>Non-Pred | Lambs       | % Total<br>Non-Pred |
|                         | <i>Head</i>                     | <i>Pct</i>          | <i>Head</i> | <i>Pct</i>          | <i>Head</i>                       | <i>Pct</i>          | <i>Head</i> | <i>Pct</i>          |
| AZ                      | 50                              | 10.0                | 100         | 6.7                 | 100                               | 20.0                | 1,200       | 80.0                |
| CA                      | 1,300                           | 11.8                | 800         | 20.0                | 1,800                             | 16.4                | 900         | 22.5                |
| CO                      | 200                             | 7.1                 | 3,600       | 32.7                | 100                               | 3.6                 | 4,100       | 37.3                |
| ID                      | 200                             | 3.4                 | 1,400       | 26.9                | 500                               | 8.5                 | 800         | 15.4                |
| IL                      | 200                             | 9.5                 | 1,000       | 19.2                | 500                               | 23.8                | 1,200       | 23.1                |
| IN                      | 300                             | 15.8                | 800         | 12.7                | 200                               | 10.5                | 2,200       | 34.9                |
| IA                      | 600                             | 10.9                | 3,400       | 14.6                | 700                               | 12.7                | 8,600       | 36.9                |
| KS                      | 300                             | 9.7                 | 900         | 15.0                | 500                               | 16.1                | 2,200       | 36.7                |
| KY                      | 100                             | 12.5                | 200         | 10.5                | 100                               | 12.5                | 200         | 10.5                |
| MD                      | 100                             | 25.0                | 100         | 8.3                 |                                   |                     | 100         | 8.3                 |
| MI                      | 500                             | 19.2                | 1,400       | 26.9                | 200                               | 7.7                 | 1,300       | 25.0                |
| MN                      | 600                             | 8.8                 | 3,000       | 19.9                | 800                               | 11.8                | 4,000       | 26.5                |
| MO                      | 400                             | 17.4                | 1,600       | 24.2                | 100                               | 4.3                 | 1,000       | 15.2                |
| MT                      | 500                             | 5.0                 | 1,200       | 19.7                | 800                               | 7.9                 | 1,000       | 16.4                |
| NE                      | 300                             | 8.6                 | 1,300       | 15.3                | 400                               | 11.4                | 1,100       | 12.9                |
| NV                      | 100                             | 3.8                 | 100         | 3.3                 | 800                               | 30.8                | 1,500       | 50.0                |
| N ENG <sup>3</sup>      | 100                             | 14.3                | 300         | 13.6                |                                   |                     | 100         | 4.5                 |
| NM                      | 600                             | 14.0                | 400         | 20.0                | 500                               | 11.6                | 200         | 10.0                |
| NY                      | 100                             | 2.7                 | 200         | 4.1                 | 400                               | 10.8                | 600         | 12.2                |
| NC                      | 100                             | 10.0                | 800         | 44.4                |                                   |                     | 100         | 5.6                 |
| ND                      | 300                             | 9.1                 | 700         | 14.0                | 300                               | 9.1                 | 1,200       | 24.0                |
| OH                      | 400                             | 8.9                 | 2,800       | 20.7                | 200                               | 4.4                 | 3,000       | 22.2                |
| OK                      | 400                             | 20.0                | 500         | 9.4                 | 400                               | 20.0                | 800         | 15.1                |
| OR                      | 500                             | 9.6                 | 400         | 18.2                | 300                               | 5.8                 | 900         | 40.9                |
| PA                      | 400                             | 11.8                | 900         | 11.5                | 100                               | 2.9                 | 900         | 11.5                |
| SD                      | 900                             | 11.3                | 3,200       | 14.5                | 1,000                             | 12.5                | 4,800       | 21.8                |
| TN                      | 100                             | 25.0                | 100         | 11.1                |                                   |                     | 200         | 22.2                |
| TX                      | 6,800                           | 27.2                | 5,500       | 32.4                | 1,700                             | 6.8                 | 2,700       | 15.9                |
| UT                      | 400                             | 7.5                 | 500         | 15.6                | 200                               | 3.8                 | 300         | 9.4                 |
| VA                      | 200                             | 10.5                | 800         | 15.7                | 200                               | 10.5                | 700         | 13.7                |
| WA                      | 200                             | 9.5                 | 100         | 16.7                | 200                               | 9.5                 | 200         | 33.3                |
| WV                      | 300                             | 21.4                | 400         | 14.3                | 200                               | 14.3                | 500         | 17.9                |
| WI                      | 200                             | 7.7                 | 1,400       | 15.9                | 200                               | 7.7                 | 1,700       | 19.3                |
| WY                      | 500                             | 6.3                 | 1,000       | 25.0                | 300                               | 3.8                 | 700         | 17.5                |
| Oth<br>Sts <sup>4</sup> | 1,000                           | 23.8                | 4,100       | 51.3                | 200                               | 4.8                 | 800         | 10.0                |
| US                      | 19,250                          | 12.9                | 45,000      | 19.8                | 14,000                            | 9.4                 | 51,800      | 22.8                |

<sup>1</sup> Includes bloat, scours, parasites, enterotoxemia, acidosis, etc.

<sup>2</sup> Includes pneumonia, shipping fever, etc.

<sup>3</sup> N ENG includes CT, ME, MA, NH, RI, and VT.

<sup>4</sup> Other States include AL, AK, AR, DE, FL, GA, HI, LA, MS, NJ, and SC.

**Losses of Sheep and Lambs: Number and Percent from Metabolic Problems  
and Other Diseases by State and United States, 2004**

| State                | Metabolic Problems <sup>1</sup> |                  |             |                  | Other Diseases <sup>2</sup> |                  |             |                  |
|----------------------|---------------------------------|------------------|-------------|------------------|-----------------------------|------------------|-------------|------------------|
|                      | Sheep                           | % Total Non-Pred | Lambs       | % Total Non-Pred | Sheep                       | % Total Non-Pred | Lambs       | % Total Non-Pred |
|                      | <i>Head</i>                     | <i>Pct</i>       | <i>Head</i> | <i>Pct</i>       | <i>Head</i>                 | <i>Pct</i>       | <i>Head</i> | <i>Pct</i>       |
| AZ                   |                                 |                  |             |                  |                             |                  |             |                  |
| CA                   | 200                             | 1.8              | 100         | 2.5              | 1,300                       | 11.8             | 200         | 5.0              |
| CO                   |                                 |                  |             |                  | 300                         | 10.7             | 100         | 0.9              |
| ID                   | 900                             | 15.3             | 100         | 1.9              | 500                         | 8.5              | 400         | 7.7              |
| IL                   | 100                             | 4.8              | 100         | 1.9              | 100                         | 4.8              |             |                  |
| IN                   |                                 |                  | 100         | 1.6              |                             |                  | 300         | 4.8              |
| IA                   | 100                             | 1.8              | 500         | 2.1              | 100                         | 1.8              | 800         | 3.4              |
| KS                   | 100                             | 3.2              |             |                  | 100                         | 3.2              | 100         | 1.7              |
| KY                   |                                 |                  |             |                  |                             |                  | 100         | 5.3              |
| MD                   |                                 |                  | 100         | 8.3              |                             |                  |             |                  |
| MI                   | 100                             | 3.8              | 100         | 1.9              | 100                         | 3.8              | 200         | 3.8              |
| MN                   | 600                             | 8.8              | 500         | 3.3              | 300                         | 4.4              | 400         | 2.6              |
| MO                   | 100                             | 4.3              | 400         | 6.1              | 100                         | 4.3              | 500         | 7.6              |
| MT                   | 300                             | 3.0              | 200         | 3.3              | 900                         | 8.9              | 200         | 3.3              |
| NE                   | 100                             | 2.9              | 100         | 1.2              | 200                         | 5.7              | 700         | 8.2              |
| NV                   | 100                             | 3.8              |             |                  |                             |                  | 100         | 3.3              |
| N ENG <sup>3</sup>   | 100                             | 14.3             |             |                  |                             |                  | 100         | 4.5              |
| NM                   | 100                             | 2.3              |             |                  | 200                         | 4.7              | 200         | 10.0             |
| NY                   | 100                             | 2.7              | 100         | 2.0              | 600                         | 16.2             |             |                  |
| NC                   |                                 |                  | 300         | 16.7             |                             |                  |             |                  |
| ND                   | 100                             | 3.0              | 200         | 4.0              | 200                         | 6.1              | 100         | 2.0              |
| OH                   | 200                             | 4.4              | 500         | 3.7              | 200                         | 4.4              | 100         | 0.7              |
| OK                   |                                 |                  | 100         | 1.9              |                             |                  | 100         | 1.9              |
| OR                   | 300                             | 5.8              | 100         | 4.5              | 200                         | 3.8              | 100         | 4.5              |
| PA                   | 100                             | 2.9              | 700         | 9.0              | 300                         | 8.8              | 300         | 3.8              |
| SD                   | 200                             | 2.5              | 500         | 2.3              | 400                         | 5.0              | 600         | 2.7              |
| TN                   |                                 |                  |             |                  |                             |                  | 100         | 11.1             |
| TX                   | 800                             | 3.2              | 700         | 4.1              | 2,500                       | 10.0             | 800         | 4.7              |
| UT                   | 100                             | 1.9              | 100         | 3.1              | 500                         | 9.4              | 200         | 6.3              |
| VA                   | 100                             | 5.3              | 100         | 2.0              |                             |                  |             |                  |
| WA                   | 100                             | 4.8              | 100         | 16.7             |                             |                  |             |                  |
| WV                   |                                 |                  |             |                  |                             |                  |             |                  |
| WI                   | 100                             | 3.8              | 200         | 2.3              | 200                         | 7.7              | 300         | 3.4              |
| WY                   | 300                             | 3.8              | 300         | 7.5              | 400                         | 5.0              | 300         | 7.5              |
| Oth Sts <sup>4</sup> |                                 |                  |             |                  | 100                         | 2.4              | 100         | 1.3              |
| Unpub <sup>5</sup>   | 100                             |                  |             |                  | 100                         |                  | 100         |                  |
| US                   | 5,500                           | 3.7              | 6,300       | 2.8              | 9,900                       | 6.6              | 7,600       | 3.3              |

<sup>1</sup> Unpublished States include IN, KY, MD, and OK for sheep. Includes milk fever, twin lamb disease, pregnancy toxemia, etc.

<sup>2</sup> Unpublished States include AZ, KY and N Eng for sheep only; IL and NY for lambs only; MD, NC, VA, WA, and WV for sheep and lambs. Includes mastitis, foot rot, boils, etc.

<sup>3</sup> New England includes CT, ME, MA, NH, RI, and VT.

<sup>4</sup> Other States include AL, AK, AR, DE, FL, GA, HI, LA, MS, NJ, and SC.

<sup>5</sup> States with values that did not meet publication requirements were combined into an Unpublished States category.

**Losses of Sheep and Lambs: Number and Percent from Weather  
and Lambing Problems by State and United States, 2004**

| State                   | Weather Related <sup>1</sup> |                     |             |                     | Lambing Problems <sup>2</sup> |                     |             |                     |
|-------------------------|------------------------------|---------------------|-------------|---------------------|-------------------------------|---------------------|-------------|---------------------|
|                         | Sheep                        | % Total<br>Non-Pred | Lambs       | % Total<br>Non-Pred | Sheep                         | % Total<br>Non-Pred | Lambs       | % Total<br>Non-Pred |
|                         | <i>Head</i>                  | <i>Pct</i>          | <i>Head</i> | <i>Pct</i>          | <i>Head</i>                   | <i>Pct</i>          | <i>Head</i> | <i>Pct</i>          |
| AZ                      | 50                           | 10.0                |             |                     |                               |                     |             |                     |
| CA                      | 200                          | 1.8                 | 600         | 15.0                | 600                           | 5.5                 |             |                     |
| CO                      | 100                          | 3.6                 | 800         | 7.3                 | 500                           | 17.9                |             |                     |
| ID                      | 100                          | 1.7                 | 500         | 9.6                 | 1,100                         | 18.6                |             |                     |
| IL                      |                              |                     | 1,100       | 21.2                | 200                           | 9.5                 | 1,300       | 25.0                |
| IN                      |                              |                     | 1,300       | 20.6                | 500                           | 26.3                | 1,000       | 15.9                |
| IA                      | 100                          | 1.8                 | 1,000       | 4.3                 | 1,000                         | 18.2                | 5,700       | 24.5                |
| KS                      | 200                          | 6.5                 | 1,600       | 26.7                | 400                           | 12.9                | 600         | 10.0                |
| KY                      |                              |                     | 200         | 10.5                | 400                           | 50.0                | 1,000       | 52.6                |
| MD                      |                              |                     | 400         | 33.3                | 100                           | 25.0                | 300         | 25.0                |
| MI                      |                              |                     | 900         | 17.3                | 300                           | 11.5                | 400         | 7.7                 |
| MN                      | 200                          | 2.9                 | 1,400       | 9.3                 | 1,000                         | 14.7                | 2,400       | 15.9                |
| MO                      | 100                          | 4.3                 | 900         | 13.6                | 500                           | 21.7                | 1,600       | 24.2                |
| MT                      | 500                          | 5.0                 | 1,400       | 23.0                | 1,300                         | 12.9                |             |                     |
| NE                      | 800                          | 22.9                | 1,200       | 14.1                | 300                           | 8.6                 | 2,400       | 28.2                |
| NV                      |                              |                     | 500         | 16.7                | 100                           | 3.8                 |             |                     |
| N ENG <sup>3</sup>      |                              |                     | 300         | 13.6                | 100                           | 14.3                | 1,000       | 45.5                |
| NM                      | 300                          | 7.0                 | 200         | 10.0                | 500                           | 11.6                |             |                     |
| NY                      |                              |                     | 2,000       | 40.8                | 800                           | 21.6                | 1,800       | 36.7                |
| NC                      |                              |                     | 100         | 5.6                 | 100                           | 10.0                | 200         | 11.1                |
| ND                      | 300                          | 9.1                 | 600         | 12.0                | 300                           | 9.1                 | 1,500       | 30.0                |
| OH                      | 200                          | 4.4                 | 2,600       | 19.3                | 1,100                         | 24.4                | 1,000       | 7.4                 |
| OK                      |                              |                     | 800         | 15.1                | 500                           | 25.0                | 1,100       | 20.8                |
| OR                      | 300                          | 5.8                 | 200         | 9.1                 | 500                           | 9.6                 |             |                     |
| PA                      | 200                          | 5.9                 | 2,000       | 25.6                | 600                           | 17.6                | 1,600       | 20.5                |
| SD                      | 300                          | 3.8                 | 3,500       | 15.9                | 900                           | 11.3                | 5,500       | 25.0                |
| TN                      |                              |                     | 300         | 33.3                | 100                           | 25.0                | 100         | 11.1                |
| TX                      | 1,000                        | 4.0                 | 3,000       | 17.6                | 2,400                         | 9.6                 |             |                     |
| UT                      | 100                          | 1.9                 | 300         | 9.4                 | 600                           | 11.3                |             |                     |
| VA                      |                              |                     | 800         | 15.7                | 200                           | 10.5                | 1,000       | 19.6                |
| WA                      |                              |                     |             |                     | 200                           | 9.5                 |             |                     |
| WV                      |                              |                     | 200         | 7.1                 | 100                           | 7.1                 | 600         | 21.4                |
| WI                      | 100                          | 3.8                 | 1,100       | 12.5                | 700                           | 26.9                | 1,000       | 11.4                |
| WY                      | 400                          | 5.0                 | 800         | 20.0                | 1,800                         | 22.5                |             |                     |
| Oth<br>Sts <sup>4</sup> | 100                          | 2.4                 | 1,100       | 13.8                | 200                           | 4.8                 | 300         | 3.8                 |
| Unpub <sup>5</sup>      | 100                          |                     |             |                     |                               |                     |             |                     |
| US                      | 5,750                        | 3.9                 | 33,700      | 14.8                | 20,000                        | 13.4                | 33,400      | 14.7                |

<sup>1</sup> Unpublished States include KY, N Eng, NY, TN, and VA for sheep. Includes chilling, drowning, lightning, etc.

<sup>2</sup> Lambs lost due to lambing problems are not applicable for AZ, CA, ID, MT, NV, NM, OR, TX, UT, WA, and WY. These States ask lambs lost before and after docking while all other States only ask for lambs lost. Estimates shown here are after docking losses only. Before docking loss estimates are available in state level publications for CO, ID, MT, UT, and WY.

<sup>3</sup> New England includes CT, ME, MA, NH, RI, and VT.

<sup>4</sup> Other States include AL, AK, AR, DE, FL, GA, HI, LA, MS, NJ, and SC.

<sup>5</sup> States with values that did not meet publication requirements were combined into an Unpublished States category.

**Losses of Sheep and Lambs: Number and Percent from Old Age  
and Being on Their Back by State and United States, 2004**

| State                   | Old Age <sup>1</sup> |                  |             |                  | On Their Back <sup>2</sup> |                  |             |                  |
|-------------------------|----------------------|------------------|-------------|------------------|----------------------------|------------------|-------------|------------------|
|                         | Sheep                | % Total Non-Pred | Lambs       | % Total Non-Pred | Sheep                      | % Total Non-Pred | Lambs       | % Total Non-Pred |
|                         | <i>Head</i>          | <i>Pct</i>       | <i>Head</i> | <i>Pct</i>       | <i>Head</i>                | <i>Pct</i>       | <i>Head</i> | <i>Pct</i>       |
| AZ                      | 100                  | 20.0             |             |                  |                            |                  |             |                  |
| CA                      | 3,900                | 35.5             |             |                  | 100                        | 0.9              |             |                  |
| CO                      | 600                  | 21.4             |             |                  | 100                        | 3.6              | 100         | 0.9              |
| ID                      | 1,100                | 18.6             |             |                  | 200                        | 3.4              | 100         | 1.9              |
| IL                      | 600                  | 28.6             |             |                  |                            |                  |             |                  |
| IN                      | 400                  | 21.1             |             |                  |                            |                  |             |                  |
| IA                      | 2,200                | 40.0             |             |                  |                            |                  | 100         | 0.4              |
| KS                      | 1,000                | 32.3             |             |                  |                            |                  |             |                  |
| KY                      | 100                  | 12.5             |             |                  |                            |                  |             |                  |
| MD                      | 200                  | 50.0             |             |                  |                            |                  | 100         | 8.3              |
| MI                      | 900                  | 34.6             |             |                  | 100                        | 3.8              |             |                  |
| MN                      | 1,700                | 25.0             |             |                  | 100                        | 1.5              |             |                  |
| MO                      | 800                  | 34.8             |             |                  |                            |                  |             |                  |
| MT                      | 3,400                | 33.7             |             |                  | 400                        | 4.0              |             |                  |
| NE                      | 700                  | 20.0             |             |                  |                            |                  |             |                  |
| NV                      | 1,000                | 38.5             |             |                  |                            |                  |             |                  |
| N ENG <sup>3</sup>      | 300                  | 42.9             |             |                  |                            |                  |             |                  |
| NM                      | 700                  | 16.3             |             |                  | 200                        | 4.7              |             |                  |
| NY                      | 900                  | 24.3             |             |                  | 200                        | 5.4              |             |                  |
| NC                      | 200                  | 20.0             |             |                  |                            |                  |             |                  |
| ND                      | 1,200                | 36.4             |             |                  | 100                        | 3.0              |             |                  |
| OH                      | 1,100                | 24.4             |             |                  | 100                        | 2.2              | 100         | 0.7              |
| OK                      | 300                  | 15.0             |             |                  |                            |                  |             |                  |
| OR                      | 1,100                | 21.2             |             |                  | 200                        | 3.8              |             |                  |
| PA                      | 1,100                | 32.4             |             |                  | 100                        | 2.9              |             |                  |
| SD                      | 2,800                | 35.0             |             |                  | 200                        | 2.5              | 100         | 0.5              |
| TN                      | 100                  | 25.0             |             |                  |                            |                  |             |                  |
| TX                      | 4,600                | 18.4             |             |                  | 100                        | 0.4              |             |                  |
| UT                      | 1,200                | 22.6             |             |                  | 100                        | 1.9              |             |                  |
| VA                      | 700                  | 36.8             |             |                  | 100                        | 5.3              |             |                  |
| WA                      | 800                  | 38.1             |             |                  |                            |                  |             |                  |
| WV                      | 600                  | 42.9             |             |                  |                            |                  |             |                  |
| WI                      | 800                  | 30.8             |             |                  |                            |                  |             |                  |
| WY                      | 1,900                | 23.8             |             |                  | 600                        | 7.5              | 100         | 2.5              |
| Oth<br>Sts <sup>4</sup> | 800                  | 19.0             |             |                  |                            |                  |             |                  |
| Unpub <sup>5</sup>      |                      |                  |             |                  |                            |                  | 100         |                  |
| US                      | 39,900               | 26.8             |             |                  | 3,000                      | 2.0              | 800         | 0.4              |

<sup>1</sup> Not applicable for Lambs.

<sup>2</sup> Unpublished States include IL, MI, MO, and OR for lambs.

<sup>3</sup> New England includes CT, ME, MA, NH, RI, and VT.

<sup>4</sup> Other States include AL, AK, AR, DE, FL, GA, HI, LA, MS, NJ, and SC.

<sup>5</sup> States with values that did not meet publication requirements were combined into an Unpublished States category.

**Losses of Sheep and Lambs: Number and Percent from Poisoning  
and Theft by State and United States, 2004**

| State                | Poisoning <sup>1</sup> |                  |             |                  | Theft       |                  |             |                  |
|----------------------|------------------------|------------------|-------------|------------------|-------------|------------------|-------------|------------------|
|                      | Sheep                  | % Total Non-Pred | Lambs       | % Total Non-Pred | Sheep       | % Total Non-Pred | Lambs       | % Total Non-Pred |
|                      | <i>Head</i>            | <i>Pct</i>       | <i>Head</i> | <i>Pct</i>       | <i>Head</i> | <i>Pct</i>       | <i>Head</i> | <i>Pct</i>       |
| AZ                   |                        |                  |             |                  |             |                  | 100         | 6.7              |
| CA                   | 500                    | 4.5              | 200         | 5.0              |             |                  | 100         | 2.5              |
| CO                   | 500                    | 17.9             | 400         | 3.6              |             |                  | 200         | 1.8              |
| ID                   | 200                    | 3.4              | 600         | 11.5             |             |                  |             |                  |
| IL                   | 100                    | 4.8              |             |                  |             |                  |             |                  |
| IN                   | 100                    | 5.3              |             |                  |             |                  |             |                  |
| IA                   | 100                    | 1.8              | 100         | 0.4              |             |                  |             |                  |
| MI                   |                        |                  | 100         | 1.9              |             |                  | 100         | 1.9              |
| MN                   | 100                    | 1.5              | 200         | 1.3              |             |                  |             |                  |
| MT                   | 500                    | 5.0              | 300         | 4.9              |             |                  |             |                  |
| NE                   |                        |                  | 100         | 1.2              |             |                  |             |                  |
| NV                   | 100                    | 3.8              |             |                  |             |                  |             |                  |
| NM                   | 400                    | 9.3              | 100         | 5.0              | 100         | 2.3              | 400         | 20.0             |
| NY                   |                        |                  |             |                  |             |                  | 100         | 2.0              |
| ND                   | 100                    | 3.0              |             |                  |             |                  |             |                  |
| OH                   | 300                    | 6.7              | 200         | 1.5              |             |                  | 100         | 0.7              |
| OK                   |                        |                  | 300         | 5.7              | 100         | 5.0              |             |                  |
| OR                   | 100                    | 1.9              | 100         | 4.5              |             |                  |             |                  |
| SD                   | 100                    | 1.3              | 200         | 0.9              |             |                  |             |                  |
| TX                   | 800                    | 3.2              | 600         | 3.5              | 100         | 0.4              | 600         | 3.5              |
| UT                   | 500                    | 9.4              | 200         | 6.3              |             |                  |             |                  |
| VA                   |                        |                  | 100         | 2.0              |             |                  |             |                  |
| WV                   |                        |                  | 100         | 3.6              |             |                  |             |                  |
| WY                   | 1,200                  | 15.0             | 600         | 15.0             | 300         | 3.8              |             |                  |
| Oth Sts <sup>3</sup> |                        |                  |             |                  | 100         | 2.4              |             |                  |
| Unpub <sup>4</sup>   | 100                    |                  |             |                  |             |                  |             |                  |
| US                   | 5,800                  | 3.9              | 4,500       | 2.0              | 700         | 0.5              | 1,700       | 0.7              |

<sup>1</sup> Unpublished States include KS, MO, NE, and WV for sheep. Includes nitrate poisoning, noxious feeds, noxious weeds, etc.

<sup>2</sup> New England includes CT, ME, MA, NH, RI, and VT.

<sup>3</sup> Other States include AL, AK, AR, DE, FL, GA, HI, LA, MS, NJ, and SC.

<sup>4</sup> States with values that did not meet publication requirements were combined into an Unpublished States category.

**Losses of Sheep and Lambs: Number and Percent from Other Non-Predators  
and Unknown Non-Predators by State and United States, 2004**

| State                | Other Non-Predator <sup>1</sup> |                  |             |                  | Unknown Non-Predator <sup>2</sup> |                  |             |                  |
|----------------------|---------------------------------|------------------|-------------|------------------|-----------------------------------|------------------|-------------|------------------|
|                      | Sheep                           | % Total Non-Pred | Lambs       | % Total Non-Pred | Sheep                             | % Total Non-Pred | Lambs       | % Total Non-Pred |
|                      | <i>Head</i>                     | <i>Pct</i>       | <i>Head</i> | <i>Pct</i>       | <i>Head</i>                       | <i>Pct</i>       | <i>Head</i> | <i>Pct</i>       |
| AZ                   | 100                             | 20.0             |             |                  | 100                               | 20.0             | 100         | 6.7              |
| CA                   | 600                             | 5.5              | 200         | 5.0              | 500                               | 4.5              | 900         | 22.5             |
| CO                   |                                 |                  | 600         | 5.5              | 400                               | 14.3             | 1,100       | 10.0             |
| ID                   | 400                             | 6.8              | 200         | 3.8              | 700                               | 11.9             | 1,100       | 21.2             |
| IL                   | 100                             | 4.8              | 200         | 3.8              | 200                               | 9.5              | 300         | 5.8              |
| IN                   | 100                             | 5.3              | 300         | 4.8              | 300                               | 15.8             | 300         | 4.8              |
| IA                   | 300                             | 5.5              | 1,700       | 7.3              | 300                               | 5.5              | 1,400       | 6.0              |
| KS                   | 100                             | 3.2              | 300         | 5.0              | 400                               | 12.9             | 300         | 5.0              |
| KY                   |                                 |                  | 100         | 5.3              | 100                               | 12.5             | 100         | 5.3              |
| MD                   |                                 |                  |             |                  |                                   |                  | 100         | 8.3              |
| MI                   | 100                             | 3.8              | 400         | 7.7              | 300                               | 11.5             | 300         | 5.8              |
| MN                   | 600                             | 8.8              | 1,300       | 8.6              | 800                               | 11.8             | 1,900       | 12.6             |
| MO                   |                                 |                  | 300         | 4.5              | 200                               | 8.7              | 300         | 4.5              |
| MT                   | 300                             | 3.0              | 400         | 6.6              | 1,200                             | 11.9             | 1,400       | 23.0             |
| NE                   | 100                             | 2.9              | 200         | 2.4              | 600                               | 17.1             | 1,400       | 16.5             |
| NV                   |                                 |                  |             |                  | 400                               | 15.4             | 800         | 26.7             |
| N ENG <sup>3</sup>   |                                 |                  | 300         | 13.6             | 100                               | 14.3             | 100         | 4.5              |
| NM                   | 200                             | 4.7              | 200         | 10.0             | 500                               | 11.6             | 300         | 15.0             |
| NY                   | 200                             | 5.4              |             |                  | 400                               | 10.8             | 100         | 2.0              |
| NC                   |                                 |                  | 200         | 11.1             | 600                               | 60.0             | 100         | 5.6              |
| ND                   | 100                             | 3.0              | 600         | 12.0             | 300                               | 9.1              | 100         | 2.0              |
| OH                   | 200                             | 4.4              | 900         | 6.7              | 500                               | 11.1             | 2,200       | 16.3             |
| OK                   | 100                             | 5.0              | 300         | 5.7              | 200                               | 10.0             | 1,300       | 24.5             |
| OR                   | 1,000                           | 19.2             | 100         | 4.5              | 700                               | 13.5             | 300         | 13.6             |
| PA                   | 100                             | 2.9              | 400         | 5.1              | 400                               | 11.8             | 1,000       | 12.8             |
| SD                   | 200                             | 2.5              | 700         | 3.2              | 1,000                             | 12.5             | 2,900       | 13.2             |
| TN                   |                                 |                  |             |                  | 100                               | 25.0             | 100         | 11.1             |
| TX                   | 1,300                           | 5.2              | 600         | 3.5              | 2,900                             | 11.6             | 2,500       | 14.7             |
| UT                   |                                 |                  |             |                  | 1,600                             | 30.2             | 1,600       | 50.0             |
| VA                   | 100                             | 5.3              | 400         | 7.8              | 300                               | 15.8             | 1,200       | 23.5             |
| WA                   | 400                             | 19.0             | 100         | 16.7             | 200                               | 9.5              | 100         | 16.7             |
| WV                   |                                 |                  | 300         | 10.7             | 200                               | 14.3             | 700         | 25.0             |
| WI                   | 100                             | 3.8              | 400         | 4.5              | 200                               | 7.7              | 2,700       | 30.7             |
| WY                   |                                 |                  |             |                  | 300                               | 3.8              | 200         | 5.0              |
| Oth Sts <sup>4</sup> | 300                             | 7.1              | 600         | 7.5              | 1,000                             | 23.8             | 800         | 10.0             |
| US                   | 7,100                           | 4.8              | 12,300      | 5.4              | 18,000                            | 12.1             | 30,100      | 13.2             |

<sup>1</sup> Includes accidents, fire, starvation, dehydration, etc.

<sup>2</sup> Exact cause of death is unidentifiable.

<sup>3</sup> New England includes CT, ME, MA, NH, RI, and VT.

<sup>4</sup> Other States include AL, AK, AR, DE, FL, GA, HI, LA, MS, NJ, and SC.

**Non-Lethal Methods Used to Prevent Losses of Sheep and Lambs to Predators,  
by State and United States, 2004**

| State                   | Fencing        | Guard Dogs     | Llamas         | Donkeys        | Lamb Shed      |
|-------------------------|----------------|----------------|----------------|----------------|----------------|
|                         | <i>Percent</i> | <i>Percent</i> | <i>Percent</i> | <i>Percent</i> | <i>Percent</i> |
| AZ                      | 40.1           | 86.5           | 1.2            | 2.4            | 32.2           |
| CA                      | 71.9           | 39.1           | 8.6            | 3.4            | 33.8           |
| CO                      | 50.7           | 28.8           | 39.0           | 2.4            | 43.7           |
| ID                      | 55.7           | 57.8           | 12.6           | 2.3            | 40.8           |
| IL                      | 52.6           | 25.8           | 7.2            | 7.8            | 52.6           |
| IN                      | 58.6           | 23.4           | 19.3           | 7.6            | 52.7           |
| IA                      | 27.9           | 48.5           | 16.3           | 3.3            | 29.5           |
| KS                      | 26.9           | 23.6           | 13.8           | 9.3            | 37.3           |
| KY                      | 59.7           | 54.4           | 8.4            | 10.9           | 13.7           |
| MD                      | 64.9           | 9.1            | 1.3            | 17.5           | 32.3           |
| MI                      | 85.0           | 5.2            | 3.4            | 0.8            | 9.5            |
| MN                      | 58.7           | 29.2           | 6.5            | 3.5            | 57.8           |
| MO                      | 20.9           | 40.8           | 22.5           | 7.2            | 9.9            |
| MT                      | 23.4           | 25.3           | 27.7           | 7.0            | 44.4           |
| NE                      | 35.9           | 44.0           | 10.9           | 7.7            | 45.1           |
| NV                      | 77.5           | 19.7           | 20.1           | 2.6            | 30.4           |
| N ENG <sup>1</sup>      | 60.6           | 53.6           | 18.3           | 3.1            | 18.4           |
| NM                      | 42.7           | 34.2           | 13.1           | 4.5            | 32.7           |
| NY                      | 81.1           | 10.1           | 5.6            | 2.1            | 1.2            |
| NC                      | 50.1           | 24.8           | 24.2           | 47.9           | 24.6           |
| ND                      | 21.0           | 30.8           | 22.7           | 6.7            | 4.5            |
| OH                      | 48.2           | 26.5           | 20.4           | 10.2           | 23.2           |
| OK                      | 67.6           | 35.2           | 19.2           | 16.5           | 13.4           |
| OR                      | 53.6           | 17.0           | 19.4           | 9.7            | 47.9           |
| PA                      | 58.0           | 41.7           | 6.7            | 10.2           | 57.6           |
| SD                      | 19.4           | 23.1           | 20.8           | 12.1           | 41.4           |
| TN                      | 27.3           | 28.5           | 4.3            | 21.7           | 16.0           |
| TX                      | 32.0           | 28.5           | 10.5           | 23.5           | 16.3           |
| UT                      | 48.4           | 31.4           | 23.4           | 7.9            | 49.4           |
| VA                      | 57.3           | 31.5           | 11.6           | 9.4            | 22.8           |
| WA                      | 68.5           | 25.0           | 16.4           | 6.7            | 35.4           |
| WV                      | 67.3           | 15.5           | 0.4            | 12.9           | 22.8           |
| WI                      | 35.7           | 15.5           | 11.8           | 6.2            | 36.5           |
| WY                      | 48.3           | 56.9           | 50.3           | 3.4            | 18.0           |
| Oth<br>Sts <sup>2</sup> | 69.0           | 44.9           | 1.7            | 11.7           | 33.5           |
| US                      | 52.5           | 31.8           | 14.0           | 9.1            | 30.8           |

<sup>1</sup> N ENG includes CT, ME, MA, NH, RI, and VT.

<sup>2</sup> Other States include AL, AK, AR, DE, FL, GA, HI, LA, MS, NJ, and SC.



**Non-Lethal Methods Used to Prevent Losses of Sheep and Lambs to Predators,  
by State and United States, 2004**

| State                   | Herding        | Night Penning  | Fright Tactics | Removing<br>Carion |
|-------------------------|----------------|----------------|----------------|--------------------|
|                         | <i>Percent</i> | <i>Percent</i> | <i>Percent</i> | <i>Percent</i>     |
| AZ                      | 11.6           | 27.8           | 2.4            | 4.2                |
| CA                      | 10.0           | 35.6           | 5.9            | 12.5               |
| CO                      | 4.7            | 69.8           | 2.7            | 31.6               |
| ID                      | 5.7            | 14.8           | 4.2            | 5.3                |
| IL                      | 8.3            | 53.9           | 5.5            | 23.5               |
| IN                      | 6.4            | 39.3           | 3.4            | 27.1               |
| IA                      | 1.7            | 14.9           | 0.8            | 1.4                |
| KS                      | 2.1            | 39.7           | 1.8            | 9.6                |
| KY                      | 1.4            | 45.0           | 3.8            | 1.5                |
| MD                      | 0.6            | 3.3            | 7.5            | 1.8                |
| MI                      | 1.9            | 10.2           | 0.4            | 1.5                |
| MN                      | 7.1            | 37.8           | 1.6            | 28.4               |
| MO                      | 5.7            | 34.2           |                | 0.4                |
| MT                      | 18.7           | 33.7           | 7.1            | 28.6               |
| NE                      | 5.5            | 56.7           | 2.5            | 8.8                |
| NV                      | 18.5           | 51.0           | 0.7            | 15.0               |
| N ENG <sup>1</sup>      | 1.7            | 34.5           | 0.1            | 1.0                |
| NM                      | 5.4            | 53.5           | 11.3           | 26.0               |
| NY                      | 0.3            | 31.8           | 0.3            | 2.0                |
| NC                      | 0.7            | 10.5           | 0.3            | 12.0               |
| ND                      | 0.5            | 34.8           | 2.9            | 1.6                |
| OH                      | 0.8            | 38.3           | 1.8            | 6.0                |
| OK                      | 2.2            | 31.2           |                | 2.6                |
| OR                      | 4.6            | 39.8           | 2.3            | 37.4               |
| PA                      | 22.4           | 41.0           | 3.2            | 7.3                |
| SD                      | 6.0            | 39.3           | 2.4            | 16.4               |
| TN                      | 8.2            | 41.8           | 4.0            | 4.3                |
| TX                      | 5.2            | 23.7           | 0.8            | 4.7                |
| UT                      | 14.4           | 27.7           | 5.5            | 33.3               |
| VA                      | 5.8            | 21.5           | 3.2            | 12.0               |
| WA                      | 2.4            | 36.6           | 2.0            | 1.0                |
| WV                      | 14.2           | 12.0           | 1.3            | 10.6               |
| WI                      | 3.8            | 27.9           | 3.1            | 18.4               |
| WY                      | 6.5            | 55.7           | 1.6            | 2.7                |
| Oth<br>Sts <sup>2</sup> | 4.5            | 19.3           | 0.2            | 16.1               |
| US                      | 5.7            | 32.9           | 2.2            | 11.7               |

<sup>1</sup> N ENG includes CT, ME, MA, NH, RI, and VT.

<sup>2</sup> Other States include AL, AK, AR, DE, FL, GA, HI, LA, MS, NJ, and SC.

**Non-Lethal Methods Used to Prevent Losses of Sheep and Lambs to Predators,  
by State and United States, 2004**

| State                   | Culling        | Change<br>Bedding | Frequent<br>Checks | Other          |
|-------------------------|----------------|-------------------|--------------------|----------------|
|                         | <i>Percent</i> | <i>Percent</i>    | <i>Percent</i>     | <i>Percent</i> |
| AZ                      | 15.0           | 22.9              | 27.1               | 1.2            |
| CA                      | 16.2           | 12.3              | 11.8               | 2.4            |
| CO                      | 32.4           | 3.4               | 9.5                | 2.1            |
| ID                      | 6.9            | 5.9               | 15.6               | 1.0            |
| IL                      | 23.6           | 7.9               | 22.4               | 7.3            |
| IN                      | 42.6           | 34.5              | 36.5               | 3.4            |
| IA                      | 1.4            | 0.3               | 1.5                | 2.0            |
| KS                      | 8.0            | 1.7               | 3.9                | 7.8            |
| KY                      | 4.7            | 8.7               | 5.3                | 13.3           |
| MD                      | 9.9            | 0.9               | 16.2               | 0.6            |
| MI                      | 4.7            | 3.2               | 8.4                | 1.6            |
| MN                      | 32.9           | 7.6               | 17.3               | 3.2            |
| MO                      | 0.8            | 0.2               | 5.9                | 1.0            |
| MT                      | 32.4           | 19.2              | 31.1               | 1.5            |
| NE                      | 16.9           | 9.0               | 9.2                | 6.8            |
| NV                      | 4.0            | 18.3              | 16.4               | 1.4            |
| N ENG <sup>1</sup>      | 1.1            | 14.5              | 2.0                | 4.7            |
| NM                      | 14.5           | 11.0              | 33.5               | 6.4            |
| NY                      | 0.2            | 2.0               |                    | 2.2            |
| NC                      | 5.8            | 9.9               | 13.1               | 0.7            |
| ND                      | 2.9            | 2.0               | 6.2                | 10.7           |
| OH                      | 11.7           | 6.6               | 11.4               | 5.3            |
| OK                      | 2.9            | 0.7               | 3.6                | 6.5            |
| OR                      | 28.7           | 10.3              | 32.2               | 1.9            |
| PA                      | 21.7           | 11.6              | 19.2               | 0.8            |
| SD                      | 25.1           | 14.2              | 18.9               | 5.2            |
| TN                      | 4.7            | 3.6               | 20.8               | 0.4            |
| TX                      | 11.2           | 6.5               | 16.7               | 4.2            |
| UT                      | 42.1           | 27.5              | 24.1               | 4.6            |
| VA                      | 18.5           | 11.8              | 18.6               | 4.4            |
| WA                      | 4.0            | 0.1               | 2.5                | 2.0            |
| WV                      | 10.9           | 13.6              | 65.1               | 2.8            |
| WI                      | 14.1           | 10.0              | 3.9                | 9.1            |
| WY                      | 6.6            | 3.3               | 11.7               | 7.2            |
| Oth<br>Sts <sup>2</sup> | 3.4            | 6.8               | 3.1                | 4.3            |
| US                      | 13.8           | 8.9               | 14.0               | 3.8            |

<sup>1</sup> N ENG includes CT, ME, MA, NH, RI, and VT.

<sup>2</sup> Other States include AL, AK, AR, DE, FL, GA, HI, LA, MS, NJ, and SC.

**Losses of All Goats: Number by Predators,  
Diseases or Other Known Causes, Unknown Causes, and Total Value, 2004**

| Item                               | Losses      |             | Total Value          |
|------------------------------------|-------------|-------------|----------------------|
|                                    | Goats       | Kids        | All Goat Losses      |
|                                    | <i>Head</i> | <i>Head</i> | <i>1,000 Dollars</i> |
| Predator                           | 40,000      | 115,000     | 15,965               |
| Diseases and<br>Other Known Causes | 60,000      | 120,000     | 18,540               |
| Unknown Causes                     | 29,200      | 51,000      | 8,261                |
| Total                              | 129,200     | 286,000     | 42,766               |

<sup>1</sup> Goat value per head is based on a two-year straight average, using Texas data, of the value of all goats reported in the January 1 Sheep and Goat Survey from 2004 to 2005.

## Reliability of Sheep and Goat Predator and Non-Predator Loss Estimates

**Survey Procedures:** A random sample of U.S. producers was surveyed to provide data for these estimates. Survey procedures ensured that all sheep producers, regardless of size, had a chance to be included in the survey. Large producers were sampled more heavily than small operations. About 22,000 operators were contacted during the first half of January by mail, telephone and face-to-face personal interview.

**Estimation Procedures:** Total death losses from all causes for sheep and lambs were as reported in *"Meat Animals, Production, Disposition, and Income - 2004"* (released April 28, 2005).

In setting the predator and non-predator loss estimates, first total predator and non-predator losses were estimated as a percent of total losses, then specific predator and non-predator losses were estimated as a percent of total predator and non-predator losses.

**Revision Policy:** Revisions to previous estimates are made to improve the current estimate. Previous year estimates are subject to revision when current estimates are made. Estimates for losses from all causes are subject to revision in next year's *"Meat Animals, Production, Disposition, and Income"*. No revision to predator or non-predator losses is planned.

## ACCESS TO REPORTS!!

---

For your convenience, there are several ways to obtain NASS reports, data products, and services:

### INTERNET ACCESS

All NASS reports are available free of charge on the worldwide Internet. For access, connect to the Internet and go to the NASS Home Page at: **[www.usda.gov/nass/](http://www.usda.gov/nass/)**. Select "Today's Reports" or Publications and then Reports Calendar or Publications and then Search, by Title or Subject.

### E-MAIL SUBSCRIPTION

All NASS reports are available by subscription free of charge direct to your e-mail address. Starting with the NASS Home Page at **[www.usda.gov/nass/](http://www.usda.gov/nass/)**, click on **Publications**, then click on the **Subscribe by E-mail** button which takes you to the page describing e-mail delivery of reports. Finally, click on **Go to the Subscription Page** and follow the instructions.

-----

### PRINTED REPORTS OR DATA PRODUCTS

**CALL OUR TOLL-FREE ORDER DESK: 800-999-6779 (U.S. and Canada)**  
**Other areas, please call 703-605-6220      FAX: 703-605-6900**  
**(Visa, MasterCard, check, or money order acceptable for payment.)**

-----

### ASSISTANCE

For **assistance** with general agricultural statistics or further information about NASS or its products or services, contact the **Agricultural Statistics Hotline** at **800-727-9540**, 7:30 a.m. to 4:00 p.m. ET, or e-mail: **[nass@nass.usda.gov](mailto:nass@nass.usda.gov)**.

The U.S. Department of Agriculture (USDA) prohibits discrimination in all its programs and activities on the basis of race, color, national origin, sex, religion, age, disability, political beliefs, sexual orientation, and marital or family status. (Not all prohibited bases apply to all programs.) Persons with disabilities who require alternative means for communication of program information (Braille, large print, audiotape, etc.) should contact USDA's TARGET Center at 202-720-2600 (voice and TDD).

To file a complaint of discrimination, write USDA, Director, Office of Civil Rights, Room 326-W, Whitten Building, 14th and Independence Avenue, SW, Washington, DC 20250-9410 or call 202-720-5964 (voice and TDD). USDA is an equal opportunity provider and employer.
