# Supplementary material for: The Elephant in the room: What can we learn from California regarding the use of sport hunting of pumas (Puma concolor) as a management tool?
Source: PLOS journal article supplement (doi:10.1371/journal.pone.0224638), 2020-02-13
Supplement: S3 (10.1371/journal.pone.0224638.s003) [file journal.pone.0224638.s003]

# **CALIFORNIA AGRICULTURAL STATISTICS**

## **1995**

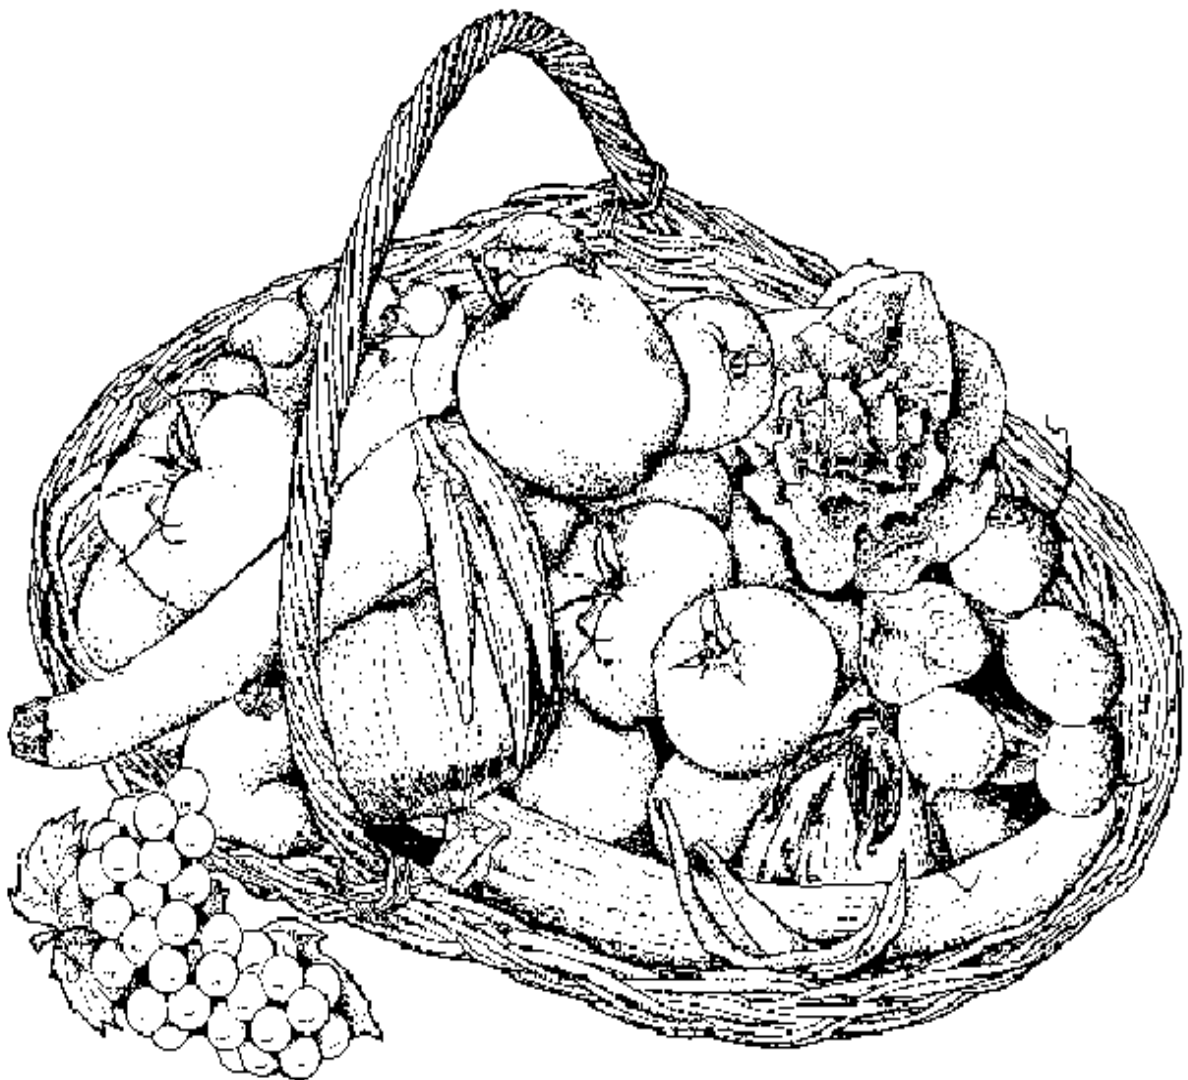

# CALIFORNIA AGRICULTURAL STATISTICS

Issued Cooperatively By

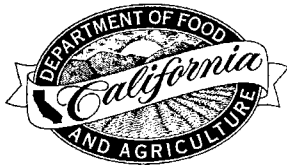

California Dept. of Food and Agriculture  
Ann M. Veneman  
Secretary

And

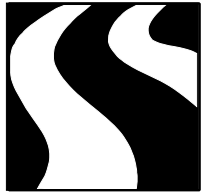

U.S. Department of Agriculture  
National Agricultural Statistics Service  
Donald M. Bay, Administrator

Compiled By

**CALIFORNIA AGRICULTURAL STATISTICS SERVICE**

1220 N Street, Room 243  
P.O. Box 1258  
Sacramento, California 95812-1258  
Phone: (916) 498-5161  
FAX: (916) 498-5186

Jim Tippet, State Statistician  
Dwayne Nelson, Deputy State Statistician

September 1996

## TABLE OF CONTENTS

| <u>CHAPTER</u>                                                          | <u>PAGE</u> |
|-------------------------------------------------------------------------|-------------|
| Agricultural Overview .....                                             | 1           |
| California Fruit and Nut Crops .....                                    | 15          |
| California Vegetables and Melons .....                                  | 43          |
| California Field Crops .....                                            | 51          |
| California Floriculture .....                                           | 73          |
| California Livestock and Dairy .....                                    | 75          |
| California Department of Food and Agriculture .....                     | 91          |
| California County Agricultural Commissioners .....                      | 92          |
| California Cooperative Extension County Offices .....                   | 94          |
| California Agricultural Statistics Service Publication Order Form ..... | 95          |

# CALIFORNIA AGRICULTURE OVERVIEW

## CALIFORNIA'S CASH RECEIPTS JUMP 4% TO A NEW RECORD HIGH

California's ranchers and farmers sold an estimated \$22.1 billion in agricultural products in 1995, up 4% from 1994. Fruits and nuts, vegetables and melons, and livestock and poultry, each comprised 25% of the total farm marketings. Field crops accounted for 15%, while nursery and greenhouse products, and Christmas trees accounted for the remaining 10%. Fruit and nut cash receipts decreased 1% to \$5.53 billion, while field crops, and livestock and poultry each increased 1% to \$3.28 billion and \$5.55 billion, respectively. Vegetable crops jumped 12% to \$5.56 billion, and nursery and greenhouse products increased 9% to \$2.17 billion. Notable increases in marketings: cotton, +17%; sweet potatoes, +24%; Freestone peaches, +43%; plums, +49%; pistachios, +18%; lettuce, +34%; celery, +27%; carrots, +26%; onions, +28%; milk and cream, +4%; and melons (cantaloupes, honeydew, watermelon), +38%. Significant decreases in marketings: rice, -29%; sugar beets, -18%; grapes, -5%; cattle and calves, -10%; and fresh market tomatoes, -23%.

## RAIN BRINGS MUCH NEEDED RELIEF TO CALIFORNIA

The Golden State experienced a very wet year (July 1994-June 1995) with precipitation much above normal for most of the State. Heavy rainfall across the State in January and March caused severe flooding and many crops were damaged. Because of the saturated soils and strong winds many trees were blown over, but especially hard hit were the almonds. The cool, rainy weather during the critical pollination reduced the production of many fruit and nut crops. Crops affected and reductions in production from the preceding year were: almonds, -50%; apricots, -64%; cherries, -62%; plums, -50%; and strawberries, -10%. March storms wrecked havoc in Monterey, California's leading vegetable county. Many vegetable crops actually showed an increase for the year. However, the storms reduced the production of the following: artichokes, -57%; asparagus, -21%; and head lettuce, -16%. Late plantings of field crops, caused by the wet, cool spring weather, and combined with heavy pest infestations in cotton, substantially reduced production of the following: Upland cotton, -15%; potatoes, -11%; rice, -14%; sugar beets, -18%; and wheat, -26%. Significant increases in production were; dry beans, +7%; Pima cotton, +21%; all hay, +10%; and sweet potatoes, +14%. Red meat production was up a modest 1% (beef, 1%; lambs and mutton, 17%; and pork, -7%). Poultry production was up 4%. California continues to lead the Nation in milk production; milk is the Golden State's leading agricultural commodity.

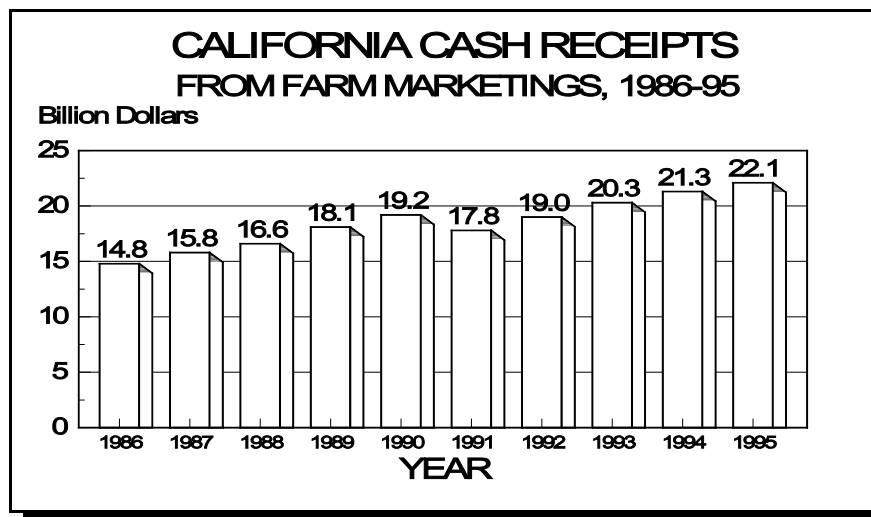

## CALIFORNIA FIRSTS

Some 250 crops are recognized in California, including seeds, flowers and ornamentals.

This report contains information about 65 major crops grown on a large commercial scale in California:

13 Field Crops  
25 Fruits and Nuts  
25 Vegetables and Melons  
Nursery Products and Cut Flowers

In addition, data are shown for 10 livestock, poultry, and other products.

California leads the Nation in the crops shown in the table below. A large number are specialty crops in which the Golden State accounts for most of the U.S. production.

| CROP AND LIVESTOCK COMMODITIES<br>IN WHICH CALIFORNIA LEADS THE NATION |                       |                         |
|------------------------------------------------------------------------|-----------------------|-------------------------|
| Alfalfa Hay                                                            | Dates                 | Oriental Vegetables     |
| Alfalfa Seed                                                           | Dry Baby Lima Beans   | Parsley                 |
| Almonds                                                                | Dry Large Lima Beans  | Peaches                 |
| Apricots                                                               | Eggs                  | Pears, Bartlett         |
| Artichokes                                                             | Figs                  | Persian Melons          |
| Asparagus                                                              | Garbanzo Beans        | Persimmons              |
| Avocados                                                               | Garlic                | Pigeons & Squabs        |
| Bedding Plants                                                         | Goat's Milk           | Pistachios              |
| Bell Peppers                                                           | Green Lima Beans      | Plums                   |
| Bermuda Grass Seed                                                     | Green Onions          | Pomegranates            |
| Blackeye Beans                                                         | Greenhouse Vegetables | Prunes                  |
| Broccoli                                                               | Herbs                 | Rabbits                 |
| Brussels Sprouts                                                       | Honey                 | Raisins                 |
| Bulbs                                                                  | Honeydew Melons       | Safflower               |
| Cantaloupes                                                            | Indoor Plants         | Sod                     |
| Carrots                                                                | Dry Kidney Beans      | Spinach                 |
| Casaba Melons                                                          | Kiwifruit             | Strawberries            |
| Cauliflower                                                            | Ladino Clover Seed    | Sudan Grass             |
| Celery                                                                 | Lemons                | Sweet Rice              |
| Chicary                                                                | Romaine Lettuce       | Table Grapes            |
| Chinchillas                                                            | Leaf Lettuce          | Processing Tomatoes     |
| Chinese Cabbage                                                        | Head Lettuce          | Vegetable & Flower Seed |
| Chinese Peas                                                           | Milk                  | Walnuts                 |
| Crenshaw Melons                                                        | Nectarines            | Wild Rice               |
| Currants                                                               | Olives                | Wine Grapes             |
| Cut Flowers                                                            | Onions                |                         |

# CALIFORNIA FARM INCOME INDICATORS, 1991-95

| Item                                         | 1991            | 1992           | 1993           | 1994           | 1995           |
|----------------------------------------------|-----------------|----------------|----------------|----------------|----------------|
|                                              | Million Dollars |                |                |                |                |
| Gross Farm Income                            | 19,363.5        | 20,309.9       | 22,185.4       | 22,733.6       | 23,309.7       |
| Gross Cash Income                            | 18,601.4        | 19,982.1       | 21,469.5       | 22,096.0       | 22,895.1       |
| Farm Marketings                              | 17,774.2        | 19,036.3       | 20,337.9       | 21,274.5       | 22,108.4       |
| Crops                                        | 12,527.1        | 13,936.3       | 14,956.4       | 15,785.8       | 16,559.9       |
| Livestock and Products                       | 5,247.1         | 5,100.0        | 5,381.5        | 5,488.7        | 5,548.5        |
| Government Payments                          | 260.8           | 430.4          | 522.1          | 272.7          | 237.8          |
| Farm-Related Income                          | 566.4           | 515.5          | 609.5          | 548.8          | 548.9          |
| Noncash Income                               | 533.8           | 531.0          | 578.7          | 636.9          | 634.1          |
| Value of Home Consumption                    | 27.3            | 23.4           | 23.4           | 15.6           | 17.9           |
| Rental Value of Dwellings                    | 506.4           | 507.5          | 555.2          | 621.4          | 616.3          |
| Operator and Other Dwellings <u>1/</u>       | 440.5           | 423.6          | 499.1          | 556.8          | 558.3          |
| Hired Laborer Dwellings                      | 65.9            | 84.0           | 56.2           | 64.5           | 57.9           |
| Value of Inventory Adjustment                | 228.4           | -203.2         | 137.2          | 0.7            | -219.5         |
| Total Production Expenses                    | 15,198.8        | 14,972.7       | 16,297.0       | 17,176.3       | 19,365.1       |
| Intermediate Product Expenses                | 8,670.4         | 8,415.1        | 9,517.1        | 10,104.0       | 11,780.9       |
| Farm Origin                                  | 2,650.4         | 2,604.5        | 2,933.3        | 2,886.4        | 3,374.5        |
| Feed Purchased                               | 1,610.5         | 1,691.1        | 2,003.4        | 1,960.8        | 2,380.5        |
| Livestock and Poultry Purchased              | 616.1           | 523.7          | 512.6          | 526.7          | 521.5          |
| Seed Purchased                               | 423.7           | 389.8          | 417.4          | 398.9          | 472.5          |
| Manufactured Inputs                          | 1,667.6         | 1,686.3        | 1,744.1        | 1,821.2        | 2,326.9        |
| Fertilizer and Lime                          | 602.3           | 572.3          | 593.6          | 665.7          | 773.3          |
| Pesticides                                   | 654.0           | 724.5          | 754.6          | 779.4          | 881.2          |
| Fuel and Oil                                 | 411.3           | 389.5          | 395.9          | 376.1          | 872.4          |
| Other                                        | 4,352.5         | 4,124.3        | 4,839.7        | 5,396.4        | 6,079.5        |
| Repair and Maintenance                       | 603.5           | 614.7          | 704.6          | 648.4          | 704.3          |
| Other Miscellaneous                          | 3,749.0         | 3,509.6        | 4,135.1        | 4,748.1        | 5,375.2        |
| Interest                                     | 978.8           | 937.1          | 990.4          | 1,103.5        | 1,202.0        |
| Real Estate                                  | 438.0           | 460.0          | 520.6          | 563.9          | 617.6          |
| Non-Real Estate                              | 540.8           | 477.0          | 469.9          | 539.5          | 584.4          |
| Contract and Hired Labor Expenses            | 3,699.9         | 3,718.9        | 3,958.8        | 4,006.9        | 4,530.5        |
| Net Rent to Non-Operator Landlords <u>2/</u> | 534.3           | 554.9          | 465.8          | 532.0          | 378.2          |
| Capital Consumption                          | 927.9           | 937.2          | 925.1          | 951.7          | 948.5          |
| Property Taxes                               | 387.5           | 409.4          | 439.8          | 478.3          | 525.0          |
| <b>NET FARM INCOME <u>3/</u></b>             | <b>4,164.7</b>  | <b>5,337.2</b> | <b>5,888.4</b> | <b>5,557.2</b> | <b>3,944.7</b> |
| Gross Receipts of Farms                      | 18,923.0        | 19,886.3       | 21,686.3       | 22,176.7       | 22,751.4       |
| Farm Production Expenses                     | 14,898.0        | 14,689.8       | 16,022.8       | 16,884.2       | 19,048.6       |
| Non-Factor Payments                          | 9,724.2         | 9,521.1        | 10,646.7       | 11,282.6       | 12,980.2       |
| Intermediate Product Expenses                | 8,566.1         | 8,361.4        | 9,470.0        | 10,052.0       | 11,719.9       |
| Capital Consumption                          | 797.7           | 781.6          | 772.0          | 793.8          | 780.2          |
| Property Taxes                               | 360.4           | 378.1          | 404.7          | 436.8          | 480.1          |
| Factor Payments                              | 5,173.8         | 5,168.7        | 5,376.1        | 5,601.6        | 6,068.4        |
| Interest                                     | 939.6           | 894.9          | 951.5          | 1,062.7        | 1,159.7        |
| Contract and Hired Labor Expenses            | 3,699.9         | 3,718.9        | 3,958.8        | 4,006.9        | 4,530.5        |
| Net Rent to Non-Operator Landlords <u>2/</u> | 534.3           | 554.9          | 465.8          | 532.0          | 378.2          |
| <b>RETURNS TO OPERATORS <u>4/</u></b>        | <b>4,025.0</b>  | <b>5,196.5</b> | <b>5,663.5</b> | <b>5,292.6</b> | <b>3,702.8</b> |
| Gross Cash Income                            | 18,601.4        | 19,982.1       | 21,469.5       | 22,096.0       | 22,895.1       |
| Cash Expenses                                | 14,074.4        | 13,864.2       | 15,233.5       | 16,065.6       | 18,250.1       |
| Cash Expenses, Excluding Net Rent            | 13,500.1        | 13,269.3       | 14,728.8       | 15,493.8       | 17,832.3       |
| Intermediate Product Expenses                | 8,566.1         | 8,361.4        | 9,470.0        | 10,052.0       | 11,719.9       |
| Interest                                     | 939.6           | 894.9          | 951.5          | 1,062.7        | 1,159.7        |
| Cash Labor Expenses                          | 3,634.0         | 3,634.9        | 3,902.6        | 3,942.4        | 4,472.5        |
| Property Taxes                               | 360.4           | 378.1          | 404.7          | 436.8          | 480.1          |
| Net Rent to Non-Operator Landlords <u>5/</u> | 574.2           | 594.9          | 504.7          | 571.8          | 417.8          |
| <b>NET CASH INCOME</b>                       | <b>4,527.0</b>  | <b>6,117.9</b> | <b>6,236.0</b> | <b>6,030.3</b> | <b>4,645.0</b> |
| Number Of Farms                              | 83,000          | 82,000         | 79,000         | 79,000         | 80,000         |

1/ Value added to gross income. Value added to net farm income equals difference in net farm income and returns to operators. 2/ Includes landlord capital consumption. 3/ Statistics in and above the Net Farm Income line represent the farm sector, defined as including farm operators' dwellings located on farms. Statistics below the Net Farm Income line represent only the farm businesses to the exclusion of the operators' dwellings. 4/ Returns to operators is equivalent to net farm income excluding the income and expenses associated with farm operators' dwellings. 5/ Excludes landlord capital consumption.

## CASH RECEIPTS DEFINED

Cash receipt data as prepared by the Economic Research Service (ERS) reflect income derived from the sale of agricultural commodities during a calendar year for only that portion of the commodity that is sold. Whereas, value of production data for crops and livestock products as prepared by the National Agricultural Statistics Service (NASS) reflect the total value of the commodity produced based on a marketing year average price. For certain commodities such as some fruits and vegetables which are normally sold in the same calendar year in which they were produced, cash receipt data and value of production data will be in close agreement. However, for most field crops, the marketing year will span portions of two calendar years, making the two data series non comparable. Data users should be aware of the differences between the ERS and NASS data series in their use of the data.

# CALIFORNIA CASH INCOME BY COMMODITIES AND COMMODITY GROUPS, 1993-95

| Source of Income                         | 1993             | 1994             | 1995             |
|------------------------------------------|------------------|------------------|------------------|
|                                          | \$1,000          |                  |                  |
| <b>FIELD CROPS</b>                       |                  |                  |                  |
| Alfalfa Seed                             | 24,116           | 40,381           | 40,400           |
| Barley                                   | 23,956           | 29,242           | 35,093           |
| Beans, Dry                               | 67,301           | 81,665           | 98,764           |
| Corn for Grain                           | 58,429           | 65,425           | 67,581           |
| Cotton Lint                              | 933,908          | 1,119,392        | 1,307,977        |
| Cottonseed                               | 116,120          | 100,575          | 84,922           |
| Hay, All                                 | 528,708          | 643,660          | 633,059          |
| Oats                                     | 3,312            | 3,111            | 3,109            |
| Oil Crops                                | 62,844           | 63,052           | 56,748           |
| Potatoes                                 | 180,695          | 171,643          | 177,328          |
| Rice                                     | 147,207          | 394,808          | 279,042          |
| Sugar Beets                              | 125,528          | 132,258          | 107,870          |
| Sweet potatoes                           | 40,221           | 45,682           | 56,784           |
| Wheat                                    | 120,202          | 156,334          | 136,347          |
| Other Field Crops                        | 174,236          | 191,827          | 193,687          |
| <b>TOTAL</b>                             | <b>2,606,783</b> | <b>3,239,055</b> | <b>3,278,711</b> |
| Percent of Gross Cash Income             | 12.1             | 14.7             | 14.3             |
| <b>FRUIT &amp; NUT CROPS</b>             |                  |                  |                  |
| Apples                                   | 138,131          | 138,478          | 140,467          |
| Apricots                                 | 32,288           | 43,700           | 20,405           |
| Cherries                                 | 43,203           | 63,512           | 41,540           |
| Figs                                     | 24,341           | 23,713           | 18,357           |
| Nectarines                               | 102,421          | 68,168           | 93,990           |
| Peaches, Clingstone                      | 113,033          | 97,470           | 90,310           |
| Peaches, Freestone                       | 90,072           | 67,918           | 97,406           |
| Pears                                    | 77,806           | 70,269           | 62,261           |
| Plums                                    | 93,954           | 79,358           | 117,849          |
| Prunes                                   | 162,845          | 172,496          | 202,294          |
| Almonds                                  | 930,618          | 900,375          | 888,000          |
| Pecans                                   | 2,880            | 1,740            | 3,584            |
| Pistachios                               | 162,640          | 118,809          | 139,722          |
| Walnuts                                  | 361,400          | 232,000          | 234,000          |
| Grapes                                   | 1,823,455        | 1,719,464        | 1,638,418        |
| Kiwifruit                                | 16,502           | 18,413           | 15,859           |
| Avocados                                 | 135,678          | 248,527          | 232,440          |
| Dates                                    | 22,756           | 18,609           | 22,701           |
| Olives                                   | 56,974           | 38,893           | 49,755           |
| Grapefruit                               | 53,058           | 51,708           | 51,741           |
| Lemons                                   | 230,044          | 193,720          | 178,218          |
| Oranges, Navel & Miscellaneous           | 303,114          | 277,759          | 241,600          |
| Oranges, Valencia                        | 171,360          | 188,700          | 188,700          |
| Tangerines                               | 27,249           | 25,804           | 19,144           |
| Bushberries                              | 43,336           | 34,047           | 27,535           |
| Strawberries                             | 457,808          | 634,126          | 634,133          |
| Other Fruits & Nuts                      | 70,950           | 80,642           | 79,150           |
| <b>TOTAL</b>                             | <b>5,747,916</b> | <b>5,608,418</b> | <b>5,529,579</b> |
| Percent of Gross Cash Income             | 26.8             | 25.4             | 24.2             |
| <b>CHRISTMAS TREES</b>                   | <b>21,000</b>    | <b>18,807</b>    | <b>19,000</b>    |
| Percent of Gross Cash Income             | 0.1              | 0.1              | 0.1              |
| <b>NURSERY &amp; GREENHOUSE PRODUCTS</b> | <b>1,902,610</b> | <b>1,986,450</b> | <b>2,171,904</b> |
| Percent of Gross Cash Income             | 8.9              | 9.0              | 9.5              |

1/ Income for 1993 includes fresh market.

| Source of Income                         | 1993              | 1994              | 1995              |
|------------------------------------------|-------------------|-------------------|-------------------|
|                                          | \$1,000           |                   |                   |
| <b>VEGETABLE CROPS</b>                   |                   |                   |                   |
| Artichokes                               | 45,762            | 61,577            | 34,299            |
| Asparagus                                | 88,177            | 101,694           | 92,028            |
| Beans, Snap 1/                           | 32,706            | 33,518            | 43,928            |
| Broccoli                                 | 247,863           | 304,070           | 317,604           |
| Brussels Sprouts                         | 24,761            | 15,471            | 16,452            |
| Cabbage                                  | 59,184            | 51,590            | 75,517            |
| Carrots                                  | 180,640           | 227,753           | 287,070           |
| Cauliflower                              | 159,245           | 154,594           | 171,559           |
| Celery                                   | 230,545           | 194,181           | 246,229           |
| Corn, Sweet                              | 50,401            | 56,260            | 62,916            |
| Cucumbers 1/                             | 46,198            | 39,428            | 59,211            |
| Garlic                                   | 132,470           | 181,038           | 179,834           |
| Lettuce                                  | 1,135,240         | 1,033,085         | 1,385,397         |
| Mushrooms                                | 134,476           | 140,235           | 146,090           |
| Onions                                   | 161,668           | 102,128           | 130,656           |
| Peppers, Green                           | 149,057           | 152,287           | 150,020           |
| Spinach                                  | 46,075            | 42,636            | 47,383            |
| Tomatoes, Fresh                          | 266,288           | 248,942           | 192,888           |
| Tomatoes, Proc.                          | 529,038           | 655,638           | 672,472           |
| Cantaloupe                               | 188,955           | 179,145           | 237,319           |
| Honeydew                                 | 44,088            | 45,177            | 78,914            |
| Watermelon                               | 59,094            | 71,164            | 91,005            |
| Other Veg. Crops                         | 666,130           | 841,438           | 841,919           |
| <b>TOTAL</b>                             | <b>4,678,061</b>  | <b>4,933,049</b>  | <b>5,560,710</b>  |
| Percent of Gross Cash Income             | 21.8              | 22.3              | 24.3              |
| <b>LIVESTOCK, POULTRY &amp; PRODUCTS</b> |                   |                   |                   |
| Aquaculture                              | 13,258            | 9,767             | 12,885            |
| Broilers                                 | 352,512           | 373,230           | 383,175           |
| Cattle & Calves                          | 1,590,174         | 1,428,205         | 1,289,765         |
| Eggs                                     | 265,988           | 255,277           | 288,369           |
| Farm Chickens                            | 1,651             | 1,058             | 1,033             |
| Hogs                                     | 50,537            | 45,186            | 35,887            |
| Honey                                    | 22,500            | 12,240            | 23,436            |
| Milk & Cream                             | 2,663,209         | 2,967,085         | 3,078,480         |
| Sheep & Lambs                            | 73,486            | 54,698            | 68,920            |
| Turkeys                                  | 208,980           | 193,242           | 212,520           |
| Wool                                     | 2,780             | 3,457             | 5,355             |
| Other Livestock & Poultry                | 136,421           | 145,265           | 148,702           |
| <b>TOTAL</b>                             | <b>5,381,496</b>  | <b>5,488,710</b>  | <b>5,548,527</b>  |
| Percent of Gross Cash Income             | 25.1              | 24.8              | 24.2              |
| <b>TOTAL CASH INCOME FROM MARKETINGS</b> | <b>20,337,866</b> | <b>21,274,489</b> | <b>22,108,431</b> |
| <b>GOVERNMENT PAYMENTS</b>               | <b>522,100</b>    | <b>272,700</b>    | <b>237,800</b>    |
| Percent of Gross Cash Income             | 2.4               | 1.2               | 1.0               |
| <b>FARM RELATED INCOME</b>               | <b>593,500</b>    | <b>548,800</b>    | <b>548,900</b>    |
| Percent of Gross Cash Income             | 2.8               | 2.5               | 2.4               |
| <b>GROSS CASH INCOME FROM FARMING</b>    | <b>21,453,500</b> | <b>22,095,900</b> | <b>22,895,100</b> |

SOURCE: USDA Economic Research Service

**COMMODITY RANKING, ACREAGE, PRODUCTION,  
VALUE, AND LEADING PRODUCING COUNTIES, 1995**

| Commodity                                     | National Ranking <u>1/</u> | California Share of U.S. Production | Harvested Acreage | Short Tons (2,000 Lbs.) | Value <u>2/</u> | Rank Among All California Commodities |      | Harvest Season  | Leading Counties <u>3/</u>                             |
|-----------------------------------------------|----------------------------|-------------------------------------|-------------------|-------------------------|-----------------|---------------------------------------|------|-----------------|--------------------------------------------------------|
|                                               | Number                     | Percent                             | 1,000 Acres       | 1,000 Tons              | \$1,000         | 1994                                  | 1995 |                 |                                                        |
|                                               |                            |                                     |                   |                         |                 | Number                                |      |                 |                                                        |
| VEGETABLES -- TOTAL VALUE -- \$ 5,546,499,000 |                            |                                     |                   |                         |                 |                                       |      |                 |                                                        |
| Artichokes                                    | 1                          | 100                                 | 8.3               | 23.6                    | 34,299          | 49                                    | 61   | Continuous      | Monterey, Riverside, Santa Cruz, Orange, San Mateo     |
| Asparagus                                     | 2                          | 38                                  | 28.0              | 39.2                    | 91,728          | 40                                    | 44   | Feb. 15-June 30 | San Joaquin, Imperial, Monterey, Santa Barbara         |
| Beans, Snap                                   | 2                          | 18                                  | 8.8               | 39.6                    | 40,392          | 62                                    | 59   | Apr. 20-Dec. 15 | Tulare, Riverside, Orange                              |
| Broccoli                                      | 1                          | 88                                  | 89.5              | 537.0                   | 317,604         | 14                                    | 15   | Continuous      | Monterey, Santa Barbara, San Luis Obispo, Imperial     |
| Brussels Sprouts <u>4/</u>                    | 1                          | 93                                  | 3.8               | 32.3                    | 16,452          | 68                                    | 68   | Aug. 1-Mar. 15  | Santa Cruz, San Mateo, Monterey                        |
| Cabbage                                       | 2                          | 20                                  | 13.0              | 240.5                   | 75,517          | 52                                    | 47   | Continuous      | Ventura, San Benito, Monterey, Santa Barbara           |
| Carrots                                       | 1                          | 55                                  | 63.5              | 702.2                   | 287,070         | 20                                    | 18   | Continuous      | Imperial, Kern, Monterey                               |
| Cauliflower                                   | 1                          | 78                                  | 40.7              | 254.4                   | 171,559         | 31                                    | 31   | Continuous      | Monterey, Santa Barbara, Imperial                      |
| Celery                                        | 1                          | 90                                  | 22.7              | 749.1                   | 246,229         | 24                                    | 19   | Continuous      | Ventura, Monterey, Santa Barbara, San Luis Obispo      |
| Corn, Sweet, Fresh Market                     | 2                          | 16                                  | 22.3              | 167.2                   | 62,552          | 50                                    | 51   | May 1-Dec. 10   | Riverside, Imperial, Fresno, San Joaquin, Contra Costa |
| Cucumbers, Fresh Market                       | 3                          | 17                                  | 5.2               | 81.9                    | 43,079          | 61                                    | 56   | Mar. 20-Nov. 30 | San Joaquin, San Diego, Riverside, Orange              |
| Processing                                    | 5                          | 8                                   | 5.2               | 42.1                    | 16,132          | 71                                    | 69   | July 1-Sept. 30 | San Joaquin , San Diego, Riverside, Orange             |
| Garlic <u>4/</u>                              | 1                          | 88                                  | 31.0              | 255.8                   | 179,834         | 26                                    | 29   | Apr. 1-Sept. 15 | Fresno, Kern, Monterey                                 |
| Lettuce, Head                                 | 1                          | 69                                  | 136.0             | 2,006.0                 | 986,952         | 9                                     | 6    | Continuous      | Monterey, Fresno, Imperial, Santa Barbara              |
| Leaf                                          | 1                          | 82                                  | 35.0              | 367.5                   | 225,645         | 22                                    | 23   | Continuous      | Monterey, Imperial, Ventura, Riverside                 |
| Romaine                                       | 1                          | 80                                  | 24.0              | 360.0                   | 172,800         | 37                                    | 30   | Continuous      | Monterey, Riverside, Ventura                           |
| Melons, Cantaloupe                            | 1                          | 65                                  | 59.3              | 682.0                   | 237,319         | 27                                    | 20   | May 15-Nov. 30  | Fresno, Imperial, Kern, Riverside, Merced              |
| Honeydew                                      | 1                          | 75                                  | 21.1              | 211.0                   | 78,914          | 56                                    | 46   | June 1-Nov. 30  | Fresno, Sutter, Riverside, Imperial, Stanislaus        |
| Watermelon                                    | 4                          | 16                                  | 17.2              | 318.2                   | 91,005          | 49                                    | 45   | May 25-Oct. 15  | Kern, Riverside, San Joaquin, Imperial, Fresno         |
| Mushrooms, Agaricus                           | 2                          | 17                                  | 0.5               | 67.4                    | 140,796         | 36                                    | 35   | Continuous      | Monterey, Santa Clara, San Mateo, San Diego            |
| Onions                                        | 1                          | 25                                  | 38.0              | 797.9                   | 130,666         | 39                                    | 37   | Apr. 1-Oct. 31  | Imperial, Fresno, Kern, San Joaquin                    |
| Peppers, Bell                                 | 1                          | 44                                  | 20.0              | 290.0                   | 150,020         | 32                                    | 33   | July 1-Dec. 10  | Riverside, San Benito, Ventura, Fresno, San Joaquin    |
| Spinach, Fresh Market                         | 1                          | 64                                  | 6.7               | 62.0                    | 42,656          | 60                                    | 57   | Continuous      | Monterey, Stanislaus, Santa Barbara                    |
| Tomatoes, Fresh Market                        | 2                          | 31                                  | 10.3              | 513.0                   | 192,888         | 18                                    | 25   | May 15-Dec. 31  | Fresno, San Joaquin, Merced, San Diego                 |
| Processing                                    | 1                          | 93                                  | 317.0             | 10,606.8                | 672,472         | 10                                    | 9    | June 20-Nov. 10 | Fresno, Yolo, Colusa, San Joaquin, Sutter              |
| Other Vegetables & Melons. Etc.               | ---                        | ---                                 | ---               | ---                     | 841,919         | ---                                   | ---  | ---             | ---                                                    |

See Footnotes on Page 8.



**COMMODITY RANKING, ACREAGE, PRODUCTION,  
VALUE, AND LEADING PRODUCING COUNTIES, 1995**

| Commodity                                          | National Ranking <u>1/</u> | California Share of U.S. Production | Harvested Acreage | Short Tons (2,000 Lbs.) | Value <u>2/</u> | Rank Among All California Commodities |      | Harvest Season  | Leading Counties <u>3/</u>                    |
|----------------------------------------------------|----------------------------|-------------------------------------|-------------------|-------------------------|-----------------|---------------------------------------|------|-----------------|-----------------------------------------------|
|                                                    | Number                     | Percent                             | 1,000 Acres       | 1,000 Tons              | \$1,000         | 1994                                  | 1995 |                 |                                               |
|                                                    |                            |                                     |                   |                         |                 | Number                                |      |                 |                                               |
| FRUITS AND NUTS -- TOTAL VALUE -- \$ 5,775,304,000 |                            |                                     |                   |                         |                 |                                       |      |                 |                                               |
| Almonds (Shelled)                                  | 1                          | 99.9                                | 400.0             | 185.0                   | 857,771         | 6                                     | 7    | Aug. 1-Oct. 31  | Kern, Stanislaus, Merced, Fresno, Madera      |
| Apples                                             | 4                          | 8.1                                 | 35                | 425.0                   | 155,750         | 34                                    | 32   | July 15-Oct. 30 | Kern, San Joaquin, Fresno, Tulare, Madera     |
| Apricots                                           | 1                          | 88.9                                | 19.8              | 52.0                    | 20,405          | 57                                    | 65   | May 1-July 15   | Stanislaus, Fresno, Kern, San Joaquin, Tulare |
| Avocados                                           | 1                          | 88.5                                | 67.6              | 156.0                   | 232,440         | 17                                    | 21   | Continuous      | San Diego, Ventura, Santa Barbara, Riverside  |
| Boysenberries                                      | 2                          | 27.4                                | 0.3               | 0.9                     | 1,710           | 75                                    | 75   | June 1-July 15  | ---                                           |
| Cherries, Sweet                                    | 4                          | 12.0                                | 12.5              | 19.8                    | 41,540          | 47                                    | 58   | May 20-June 25  | San Joaquin, Stanislaus, Tulare, Santa Clara  |
| Dates <u>4/</u>                                    | 1                          | 99.5                                | 5.5               | 22.0                    | 16,456          | 67                                    | 67   | Oct. 1-Dec. 15  | Riverside, Imperial                           |
| Figs <u>4/</u>                                     | 1                          | 99.9                                | 15.0              | 50.0                    | 18,357          | 65                                    | 66   | June 10-Sep. 15 | Madera, Merced, Fresno                        |
| Grapefruit, All                                    | 2                          | 13.1                                | 18.4              | 311.6                   | 52,827          | 53                                    | 53   | ---             | Riverside, Tulare, San Diego, Kern            |
| Desert                                             | ---                        | ---                                 | 8.0               | 110.6                   | 14,423          | ---                                   | ---  | Nov. 10-June 10 | ---                                           |
| Other                                              | ---                        | ---                                 | 10.4              | 201.0                   | 38,404          | ---                                   | ---  | Mar. 15-Oct. 25 | ---                                           |
| Grapes, All                                        | 1                          | 88.4                                | 645.2             | 5,248.0                 | 1,838,900       | 2                                     | 2    | ---             | Fresno, Tulare, Kern, San Joaquin, Madera     |
| Raisin Type                                        | ---                        | ---                                 | 268.0             | 2,255.0                 | 496,860         | ---                                   | ---  | May 15-Nov. 15  | ---                                           |
| Table Type                                         | ---                        | ---                                 | 76.2              | 718.0                   | 376,890         | ---                                   | ---  | May 25-Dec. 15  | ---                                           |
| Wine Type                                          | --                         | ---                                 | 301.0             | 2,275.0                 | 965,150         | ---                                   | ---  | Aug. 5-Dec. 15  | ---                                           |
| Kiwifruit <u>4/</u>                                | 1                          | 99.5                                | 6.6               | 38.0                    | 15,089          | 66                                    | 70   | Oct. 1-May 31   | Tulare, Butte, Fresno, Yuba, Kern             |
| Lemons                                             | 1                          | 85.1                                | 45.7              | 779.0                   | 228,308         | 23                                    | 22   | Continuous      | Ventura, San Diego, Kern, Riverside           |
| Nectarines <u>4/</u>                               | 1                          | 93.0                                | 32.4              | 176.0                   | 93,990          | 46                                    | 42   | June 10-Sep. 5  | Fresno, Tulare, Kern, Kings                   |
| Olives                                             | 1                          | 100.0                               | 33.7              | 77.5                    | 47,528          | 58                                    | 54   | Sep. 25-Mar. 15 | Tulare, Glenn, Tehama, Kern, Madera           |
| Oranges, All                                       | 2                          | 19.0                                | 191.0             | 2,287.5                 | 458,130         | 12                                    | 12   | ---             | Tulare, Kern, Fresno, Ventura, San Diego      |
| Navel & Misc.                                      | ---                        | ---                                 | 118.0             | 1,312.5                 | 273,750         | ---                                   | ---  | Nov. 25-May 15  | ---                                           |
| Valencia                                           | ---                        | ---                                 | 73.0              | 975.0                   | 184,380         | ---                                   | ---  | May 15-Oct. 15  | ---                                           |
| Peaches, All                                       | 1                          | 62.4                                | 60.6              | 683.5                   | 183,485         | 29                                    | 28   | ---             | Fresno, Tulare, Stanislaus, Sutter, Kern      |
| Clingstone                                         | ---                        | 100.0                               | 28.1              | 432.5                   | 90,310          | ---                                   | ---  | July 15-Sep. 15 | ---                                           |
| Freestone                                          | ---                        | 36.7                                | 32.5              | 251.0                   | 93,175          | ---                                   | ---  | May 10-Sep. 15  | ---                                           |
| Pears, All                                         | 2                          | 28.2                                | 23.9              | 267.0                   | 63,187          | 45                                    | 50   | Aug. 5-Oct. 5   | Sacramento, Lake, Mendocino, Tulare           |
| Pecans                                             | 9                          | 1.1                                 | 2.6               | 1.4                     | 3,712           | 74                                    | 74   | Sep. 1-Nov. 30  | Tulare                                        |
| Pistachios                                         | 1                          | 100                                 | 60.3              | 74.0                    | 141,636         | 38                                    | 34   | Sep. 15-Dec. 10 | Kern, Madera, Tulare, Kings, Fresno           |
| Plums                                              | 1                          | 84.4                                | 42.0              | 124.0                   | 117,849         | 43                                    | 39   | May 25-Aug. 20  | Tulare, Fresno, Kern                          |
| Prunes, Dried Basis                                | 1                          | 100.0                               | 78.8              | 181.0                   | 188,240         | 21                                    | 27   | Aug. 15-Oct. 10 | Sutter, Butte, Yuba, Tulare, Tehama           |
| Raspberries                                        | 3                          | 17.7                                | 1.9               | 7.6                     | 23,325          | 63                                    | 64   | June 1-Oct. 31  | Santa Cruz, Monterey                          |

See Footnotes on Page 8.

**COMMODITY RANKING, ACREAGE, PRODUCTION,  
VALUE, AND LEADING PRODUCING COUNTIES, 1995**

| Commodity                                                   | National Ranking <u>1/</u> | California Share of U.S. Production | Harvested Acreage | Short Tons (2,000 Lbs.) | Value <u>2/</u> | Rank Among All California Commodities |      | Harvest Season  | Leading Counties <u>3/</u>                                |
|-------------------------------------------------------------|----------------------------|-------------------------------------|-------------------|-------------------------|-----------------|---------------------------------------|------|-----------------|-----------------------------------------------------------|
|                                                             | Number                     | Percent                             | 1,000 Acres       | 1,000 Tons              | \$1,000         | 1994                                  | 1995 |                 |                                                           |
|                                                             |                            |                                     |                   |                         |                 | Number                                |      |                 |                                                           |
| Strawberries                                                | 1                          | 79.6                                | 23.6              | 595.9                   | 551,698         | 11                                    | 11   | Feb. 20-Nov. 15 | Monterey, Ventura, Santa Barbara, Santa Cruz, Orange      |
| Fresh Market                                                | 1                          | 76.7                                | ---               | 400.0                   | 459,257         | ---                                   | ---  | ---             | ---                                                       |
| Processing                                                  | 1                          | 86.1                                | ---               | 195.9                   | 92,441          | ---                                   | ---  | ---             | ---                                                       |
| Tangerines, Mandarins, Tangelos, & Tangors                  | 2                          | 19.8                                | 8.5               | 82.5                    | 30,261          | 64                                    | 62   | Nov. 1-Apr. 30  | Tulare, Riverside, Imperial                               |
| Walnuts <u>4/</u>                                           | 1                          | 99.5                                | 169.0             | 234.0                   | 313,560         | 19                                    | 16   | Sep. 5-Nov. 10  | San Joaquin, Stanislaus, Butte, Tulare, Sutter            |
| Other Fruit and Nuts                                        | ---                        | ---                                 | ---               | ---                     | 79,150          | ---                                   | ---  | ---             | ---                                                       |
| FIELD AND SEED CROPS -- TOTAL VALUE -- \$ 3,511,814,000     |                            |                                     |                   |                         |                 |                                       |      |                 |                                                           |
| Barley                                                      | 6                          | 3.9                                 | 200.0             | 336.0                   | 45,500          | 59                                    | 55   | May 15-Oct. 1   | Tulare, Siskiyou, Kings, Modoc, Kern                      |
| Beans, Dry                                                  | 4                          | 9.5                                 | 137.0             | 148.0                   | 101,824         | 41                                    | 41   | Aug. 20-Nov. 15 | Stanislaus, Fresno, San Joaquin, Tulare, Kern             |
| Corn for Grain                                              | 25                         | 0.3                                 | 150.0             | 672.0                   | 92,400          | 42                                    | 43   | Sept. 1-Dec. 1  | San Joaquin, Sacramento, Yolo, Solano, Glenn              |
| All Cotton, Lint                                            | 2                          | 14.2                                | 1,280.0           | 608.8                   | 1,063,505       | 5                                     | 5    | Oct. 1-Jan. 1   | Fresno, Kern, Kings, Tulare, Merced                       |
| All Cotton, Seed                                            | 2                          | 13.7                                | ---               | 940.0                   | 124,080         | 33                                    | 38   | ---             | Fresno, Kings, Kern, Tulare, Merced                       |
| Hay, Alfalfa & Other                                        | 2                          | 5.8                                 | 1,600.0           | 9,000.0                 | 841,200         | 7                                     | 8    | Mar. 1-Nov. 5   | Imperial, Kern, Fresno, Merced, Tulare                    |
| Oats                                                        | 17                         | 1.6                                 | 30.0              | 40.8                    | 5,228           | 72                                    | 73   | June 15-Oct. 1  | San Joaquin, Siskiyou, Riverside, Merced, Solano          |
| Potatoes                                                    | 10                         | 3.3                                 | 41.3              | 731.0                   | 190,894         | 28                                    | 26   | Continuous      | Kern, Siskiyou, Riverside, Modoc, San Joaquin             |
| Rice <u>5/ 6/</u>                                           | 2                          | 20.3                                | 465.0             | 1,767.6                 | 318,168         | 15                                    | 14   | Sept. 1-Nov. 30 | Colusa, Sutter, Glenn, Butte, Yuba                        |
| Sugar Beets <u>5/ 6/</u>                                    | 3                          | 11.5                                | 115.0             | 3,220.0                 | 107,870         | 35                                    | 40   | Apr. 1-Dec. 10  | Imperial, Fresno, San Joaquin, Solano, Kern               |
| Sweet Potatoes                                              | 3                          | 12.8                                | 8.3               | 83.0                    | 63,360          | 54                                    | 49   | July 15-Nov. 15 | Merced, Stanislaus                                        |
| Wheat, All                                                  | 19                         | 1.5                                 | 493.0             | 981.8                   | 139,953         | 30                                    | 36   | May 20-Sept. 1  | Imperial, Tulare, Kings, Kern, Solano                     |
| Oil Crops <u>7/</u>                                         | N/A                        | 37.1                                | 179.2             | 183.3                   | 56,748          | 48                                    | 52   | ---             | ---                                                       |
| Other Field Crops                                           | ---                        | ---                                 | ---               | ---                     | 361,084         | ---                                   | ---  | ---             | ---                                                       |
| NURSERY AND FLOWER CROPS -- TOTAL VALUE -- \$ 2,171,904,000 |                            |                                     |                   |                         |                 |                                       |      |                 |                                                           |
| Nursery Products <u>4/ 6/ 8/</u>                            | 1                          | 24.6                                | ---               | ---                     | 1,500,000       | 4                                     | 3    | Continuous      | San Diego, Monterey, San Mateo, Kern, Ventura             |
| Flowers & Foliage <u>9/</u>                                 | 1                          | 20.5                                | ---               | ---                     | 671,904         | 8                                     | 10   | Continuous      | San Diego, San Mateo, Santa Barbara, Monterey, Santa Cruz |

See Footnotes on Page 8.

# COMMODITY RANKING, VALUE, AND LEADING PRODUCING COUNTIES, 1995

| Commodity                                                                | National Ranking <u>1/</u> | California Share of U.S. Production | Marketings   | Cash Receipts <u>2/</u> | Rank Among All California Commodities |      | Leading Counties <u>3/</u>                               |
|--------------------------------------------------------------------------|----------------------------|-------------------------------------|--------------|-------------------------|---------------------------------------|------|----------------------------------------------------------|
|                                                                          | Number                     | Percent                             | 1,000 Pounds | \$1,000                 | 1994                                  | 1995 |                                                          |
|                                                                          |                            |                                     |              |                         | Number                                |      |                                                          |
| LIVESTOCK, DAIRY, POULTRY, AND APIARY -- TOTAL VALUE -- \$ 5,548,527,000 |                            |                                     |              |                         |                                       |      |                                                          |
| Aquaculture                                                              | ---                        | ---                                 | ---          | 12,885                  | 70                                    | 71   | Riverside, Imperial, Sacramento                          |
| Cattle and Calves                                                        | 7                          | 4.8                                 | 2,703,670    | 1,289,765               | 3                                     | 4    | Tulare, Imperial, Fresno, Kern, San Bernardino           |
| Chickens, All                                                            | ---                        | 3.5                                 | 1,233,360    | 384,208                 | 13                                    | 13   | Fresno, Merced, Stanislaus, San Bernardino               |
| Broilers & Fryers                                                        | 10                         | 3.4                                 | 1,179,000    | 383,175                 | ---                                   | ---  | ---                                                      |
| Other                                                                    | 8                          | 5.1                                 | 54,360       | 1,033                   | ---                                   | ---  | ---                                                      |
| Hogs & Pigs                                                              | 26                         | 0.4                                 | 89,366       | 35,887                  | 55                                    | 60   | Tulare, Merced, Fresno                                   |
| Honey                                                                    | 1                          | 18.6                                | 39,060       | 23,436                  | 69                                    | 63   | Tulare, Kern, Riverside, Los Angeles, Kings              |
| Milk & Cream                                                             | 1                          | 16.2                                | 24,742,000   | 3,078,480               | 1                                     | 1    | Tulare, San Bernardino, Merced, Stanislaus, Riverside    |
| Sheep & Lambs                                                            | 2                          | 12.3                                | 98,218       | 68,920                  | 51                                    | 48   | Merced, Tulare, Kern, Solano, San Joaquin                |
| Turkeys                                                                  | 5                          | 6.8                                 | 462,000      | 212,520                 | 25                                    | 24   | Fresno, Stanislaus, Merced, Kings, Madera                |
| Wool                                                                     | 3                          | 8.3                                 | 5,250        | 5,355                   | 73                                    | 72   | ---                                                      |
| Eggs, Chicken                                                            | 1                          | 8.7                                 | 6,444        | 288,369                 | 16                                    | 17   | Riverside, San Diego, Stanislaus, San Bernardino, Merced |
| Other Livestock & Poultry                                                | ---                        | ---                                 | ---          | 148,702                 | ---                                   | ---  | ---                                                      |

1/ Based on quantity produced for crops and on quantity marketed for livestock and poultry products.

2/ Based on value of quantity harvested for crops, value of quantity marketed for livestock and value of quantity produced for poultry products.

3/ Based on values published in the Annual County Agricultural Commissioners' Reports.

4/ Share of U.S. production based on 1987 Census of Agriculture.

5/ The 1995 price and value are based on the 1994 California average price.

6/ Extracted from Agricultural Commissioners' Annual Crop Reports.

7/ Includes Sunflower, Safflower, and Canola.

8/ Includes trees, shrubs, vines, bulbs, turf, etc., not included in flowers and foliage category.

9/ Includes cut flowers, potted plants, foliage plants, bedding plants and indoor decoratives.

## CALIFORNIA'S LEADING FARM PRODUCTS

- California's "Top Twenty" crop and livestock commodities account for 72% of the State's gross farm income.
  - This is illustrated by the fact that only one product exceeds 10%, and the five leading commodities account for about two-fifths, of the State's total gross farm income.
- California's Diversity**
- California agriculture is considered one of the most diversified in the world, with no one crop dominating the State's farm economy.
  - California continues to lead the nation with many commodities, primarily fruit and nut crops and vegetables. Fruit, nut and vegetable crops produced in California account for over half of the nation's production.

### CALIFORNIA'S TOP TWENTY

| Farm Product         | Commodity Ranking |      | Value          |           | Percent of Total |      |
|----------------------|-------------------|------|----------------|-----------|------------------|------|
|                      | 1994              | 1995 | 1994           | 1995      | 1994             | 1995 |
|                      | <i>Number</i>     |      | <i>\$1,000</i> |           | <i>Percent</i>   |      |
| Milk and Cream       | 1                 | 1    | 2,967,085      | 3,078,480 | 13.8             | 13.7 |
| Grapes               | 2                 | 2    | 1,712,939      | 1,838,900 | 7.9              | 8.2  |
| Nursery Products     | 4                 | 3    | 1,285,002      | 1,500,000 | 6.0              | 6.7  |
| Cattle and Calves    | 3                 | 4    | 1,428,205      | 1,289,765 | 6.6              | 5.7  |
| Cotton Lint          | 5                 | 5    | 1,137,718      | 1,063,505 | 5.3              | 4.7  |
| Lettuce, Head        | 9                 | 6    | 698,610        | 986,952   | 3.2              | 4.4  |
| Almonds              | 6                 | 7    | 965,202        | 857,771   | 4.5              | 3.8  |
| Hay                  | 7                 | 8    | 853,220        | 847,050   | 3.6              | 3.8  |
| Tomatoes, Processing | 10                | 9    | 655,638        | 672,472   | 3.0              | 3.0  |
| Flowers and Foliage  | 8                 | 10   | 701,448        | 671,904   | 3.3              | 3.0  |
| Strawberries         | 11                | 11   | 647,575        | 551,698   | 3.0              | 2.5  |
| Oranges              | 12                | 12   | 462,567        | 458,130   | 2.1              | 2.0  |
| Chickens             | 13                | 13   | 374,288        | 384,208   | 1.7              | 1.7  |
| Rice                 | 15                | 14   | 287,331        | 318,168   | 1.3              | 1.4  |
| Broccoli             | 14                | 15   | 304,070        | 317,604   | 1.4              | 1.4  |
| Walnuts              | 19                | 16   | 232,000        | 313,560   | 1.1              | 1.4  |
| Eggs, Chicken        | 16                | 17   | 255,277        | 288,369   | 1.2              | 1.3  |
| Carrots              | 20                | 18   | 227,753        | 287,070   | 1.1              | 1.3  |
| Celery               | 22                | 19   | 194,181        | 246,229   | 0.9              | 1.1  |
| Cantaloupe           | 27                | 20   | 179,145        | 237,319   | 0.8              | 1.1  |

**CALIFORNIA'S LEADING AGRICULTURAL COUNTIES  
BY TOTAL VALUE OF PRODUCTION -- 1995 <sup>1/</sup>**

| Rank |      | County          | Value of Production | Leading Crops <sup>2/</sup>                                                             |
|------|------|-----------------|---------------------|-----------------------------------------------------------------------------------------|
| 1994 | 1995 |                 | \$1,000             |                                                                                         |
| 1    | 1    | Fresno          | 3,167,157           | Cotton, Grapes, Poultry, Tomatoes, Milk                                                 |
| 2    | 2    | Tulare          | 2,610,290           | Milk, Oranges, Grapes, Cattle & Calves, Cotton Lint & Cottonseed                        |
| 4    | 3    | Monterey        | 2,028,492           | Head Lettuce, Broccoli, Strawberries, Leaf Lettuce, Cauliflower                         |
| 3    | 4    | Kern            | 1,978,319           | Grapes, Cotton & Cottonseed, Citrus, Almonds & By-Products, Milk                        |
| 7    | 5    | San Joaquin     | 1,222,600           | Grapes, Milk, Almonds, Tomatoes, Walnuts                                                |
| 5    | 6    | Merced          | 1,220,175           | Milk, Almonds, Chickens, Cotton, Tomatoes                                               |
| 8    | 7    | Riverside       | 1,163,430           | Milk, Table Grapes, Eggs, Nursery, Cattle & Calves                                      |
| 6    | 8    | Stanislaus      | 1,115,489           | Milk, Almonds, Chickens, Chicken Eggs, Cattle & Calves                                  |
| 9    | 9    | San Diego       | 1,048,721           | Indoor Decoratives, Ornamental Trees & Shrubs, Bedding Plants & Turf, Avocados, Eggs    |
| 10   | 10   | Imperial        | 1,008,653           | Cattle, Alfalfa, Head Lettuce, Carrots, Leaf Lettuce                                    |
| 11   | 11   | Ventura         | 921,744             | Lemons, Strawberries, Celery, Avocados, Nursery Stock                                   |
| 12   | 12   | Kings           | 837,899             | Cotton & Cottonseed, Milk, Cattle & Calves, Turkeys, Grapes                             |
| 13   | 13   | San Bernardino  | 607,607             | Milk, Cattle & Calves, Eggs, Nursery Products, Alfalfa Hay & Greenchop                  |
| 14   | 14   | Madera          | 598,565             | Almonds, Raisin Grapes, Wine Grapes, Market Milk, Cotton Lint                           |
| 15   | 15   | Santa Barbara   | 533,803             | Broccoli, Strawberries, Avocados, Grapes, Head Lettuce                                  |
| 17   | 16   | Sonoma          | 342,550             | Wine Grapes, Market Milk, Misc. Livestock & Poultry, Vegetables, Cattle & Calves        |
| 16   | 17   | Sutter          | 328,925             | Rice & Seed, Prunes, Tomatoes & Seed, Walnuts, Peaches                                  |
| 18   | 18   | San Luis Obispo | 321,598             | Grapes, Broccoli, Head Lettuce, Cattle & Calves, Vegetable Transplants                  |
| 20   | 19   | Colusa          | 304,900             | Rice, Processing Tomatoes, Almonds, Wheat, Rice Seed                                    |
| 19   | 20   | Yolo            | 297,200             | Tomatoes, Wine Grapes, Rice, Almonds, Alfalfa Hay                                       |
| 21   | 21   | Butte           | 260,273             | Rice, Almonds, Walnuts, Prunes, Nursery Stock                                           |
| 22   | 22   | Glenn           | 237,048             | Rice, Dairy Products, Almonds, Prunes, Alfalfa Hay                                      |
| 23   | 23   | Santa Cruz      | 235,047             | Strawberries, Head Lettuce, Raspberries, Hybrid Tea Roses, Apples                       |
| 25   | 24   | Orange          | 234,015             | Nursery & Cut Flowers, Strawberries, Avocados, Celery, Bell Peppers                     |
| 24   | 25   | Sacramento      | 228,761             | Milk, Wine Grapes, Bartlett Pears, Field Corn, Processing Tomatoes                      |
| 26   | 26   | Los Angeles     | 222,725             | Ornamental Trees & Shrubs, Bedding Plants, Dry Onions, Peaches, Indoor Plants & Foliage |
| 27   | 27   | San Mateo       | 194,752             | Ornamental Nursery Stock, Potted Foliage Plants, Mushrooms, Snapdragons, Potted Orchids |
| 28   | 28   | Solano          | 180,387             | Processing Tomatoes, Nursery Stock, Alfalfa Hay, Sugar Beets, Field Corn                |
| 31   | 29   | San Benito      | 160,474             | Head Lettuce, Bell Peppers, Nursery Stock, Baby Lettuce, Leaf Lettuce                   |
| 29   | 30   | Santa Clara     | 159,686             | Mushrooms, Nursery Crops, Cut Flowers, Bell Peppers, Leaf Lettuce                       |
| 30   | 31   | Napa            | 150,405             | Grapes, Floral & Nursery Products, Cattle & Calves, Milk, Pasture & Range               |
| 33   | 32   | Siskiyou        | 120,784             | Cattle & Calves, Alfalfa Hay, Potatoes & Seed, Pasture & Range, Nursery Products        |
| 32   | 33   | Yuba            | 120,776             | Rice, Prunes, Walnuts, Peaches, Cattle & Calves                                         |
| 34   | 34   | Tehama          | 96,738              | Walnuts, Prunes, Almonds, Cattle & Calves, Pasture & Range                              |
| 36   | 35   | Mendocino       | 89,220              | Wine Grapes, Bartlett Pears, Cattle & Calves, Pasture, Milk                             |
| 35   | 36   | Contra Costa    | 75,818              | Bedding Plants, Apples, Tomatoes, Milk, Sweet Corn                                      |

<sup>1/</sup> Timber not included.

<sup>2/</sup> Extracted from County Commissioner Reports where shown.

SOURCE: California Agricultural Commissioners' Reports

**CALIFORNIA'S 1994-95 AND 1995-96  
SEASON RAINFALL WITH COMPARISONS TO NORMAL**

| Stations               | 1994-95                         |                   | 1995-96                         |                   | Normal Annual Rainfall |
|------------------------|---------------------------------|-------------------|---------------------------------|-------------------|------------------------|
|                        | Precipitation July 1 to June 30 | Percent of Normal | Precipitation July 1 to June 30 | Percent of Normal |                        |
|                        | <i>Inches</i>                   |                   | <i>Inches</i>                   |                   | <i>Inches</i>          |
| NORTH COAST            |                                 |                   |                                 |                   |                        |
| Eureka                 | 57.78                           | 154               | 43.62                           | 116               | 37.53                  |
| Ukiah                  | Missing                         | ---               | 23.29                           | 61                | 37.96                  |
| Santa Rosa             | 47.82                           | 158               | 36.72                           | 121               | 30.30                  |
| Lakeport               | 56.92                           | 182               | 35.96                           | 115               | 31.25                  |
| St. Helena             | 58.35                           | 166               | 46.49                           | 132               | 35.19                  |
| CENTRAL COAST          |                                 |                   |                                 |                   |                        |
| San Francisco AP       | 29.61                           | 150               | 24.67                           | 125               | 19.70                  |
| San Jose               | 23.59                           | 164               | 17.20                           | 119               | 14.42                  |
| Livermore              | 21.02                           | 148               | 19.76                           | 139               | 14.21                  |
| Salinas AP/Monterey 1/ | 28.50                           | 152               | 13.61                           | 109               | 12.44                  |
| Monterey               | ---                             | ---               | 20.94                           | 112               | 18.72                  |
| King City              | 19.24                           | 168               | 10.41                           | 91                | 11.44                  |
| Paso Robles AP         | 25.89                           | 186               | 11.21                           | 80                | 13.95                  |
| SACRAMENTO VALLEY      |                                 |                   |                                 |                   |                        |
| Redding                | 57.22                           | 172               | 39.29                           | 118               | 33.30                  |
| Willows                | 34.04                           | 195               | 20.39                           | 117               | 17.49                  |
| Chico                  | 56.56                           | 215               | 26.40                           | 100               | 26.32                  |
| Marysville             | 38.29                           | 182               | 24.29                           | 115               | 21.04                  |
| Woodland               | 32.05                           | 165               | 25.40                           | 131               | 19.43                  |
| Sacramento AP          | 27.63                           | 158               | 21.05                           | 120               | 17.52                  |
| SAN JOAQUIN VALLEY     |                                 |                   |                                 |                   |                        |
| Stockton AP            | 17.50                           | 125               | 17.03                           | 122               | 13.95                  |
| Newman                 | 18.86                           | 178               | 14.59                           | 138               | 10.58                  |
| Merced                 | 17.70                           | 147               | 12.96                           | 108               | 12.01                  |
| Fresno AP              | 19.03                           | 179               | 12.10                           | 114               | 10.60                  |
| Five Points            | 13.22                           | 198               | 5.13                            | 77                | 6.67                   |
| Kettleman Station      | 13.50                           | 204               | 5.34                            | 81                | 6.61                   |
| Porterville            | 15.90                           | 144               | 9.65                            | 87                | 11.03                  |
| Bakersfield            | 10.29                           | 180               | 6.26                            | 109               | 5.72                   |
| SOUTH COAST            |                                 |                   |                                 |                   |                        |
| Santa Maria AP         | 26.50                           | 214               | 12.88                           | 104               | 12.36                  |
| Santa Barbara AP       | 36.21                           | 223               | Missing                         | ---               | 16.25                  |
| Oxnard                 | 28.66                           | 199               | 11.44                           | 80                | 14.38                  |
| Los Angeles            | 24.35                           | 165               | 9.95                            | 67                | 14.77                  |
| Riverside              | 16.89                           | 176               | 2.52                            | 26                | 9.58                   |
| San Diego AP           | 17.12                           | 173               | 4.75                            | 48                | 9.90                   |
| SOUTHEASTERN INTERIOR  |                                 |                   |                                 |                   |                        |
| Bishop                 | Missing                         | ---               | 0.91                            | 17                | 5.37                   |
| Daggett AP             | Missing                         | ---               | 1.05                            | 27                | 3.93                   |
| Thermal AP             | 2.93                            | 93                | 0.10                            | 3                 | 3.16                   |
| Blythe AP              | Missing                         | ---               | 1.87                            | 52                | 3.60                   |
| Imperial               | 3.14                            | 114               | 0.28                            | 10                | 2.75                   |
| CASCADE-SIERRA         |                                 |                   |                                 |                   |                        |
| Tulelake               | 14.13                           | 128               | 14.49                           | 131               | 11.05                  |
| Alturas                | 17.09                           | 142               | 16.03                           | 133               | 12.01                  |
| Mt. Shasta City        | 65.50                           | 177               | 35.14                           | 95                | 37.02                  |
| Blue Canyon AP         | 95.71                           | 143               | 87.18                           | 130               | 67.04                  |
| Yosemite Valley        | 63.66                           | 172               | 41.89                           | 113               | 37.05                  |
| Huntington Lake        | 80.41                           | 218               | 43.79                           | 119               | 36.93                  |

<sup>1/</sup> Weather Station has moved from Salinas (1993-94) to Monterey (1994/95).

**SOURCE:** National Weather Service Office, Sacramento, CA

# CALIFORNIA FRUIT AND VEGETABLE CROP SEASONS

| Commodity         | Jan. | Feb. | Mar. | Apr. | May | June | July | Aug. | Sept. | Oct. | Nov. | Dec. |
|-------------------|------|------|------|------|-----|------|------|------|-------|------|------|------|
| <b>FRUIT</b>      |      |      |      |      |     |      |      |      |       |      |      |      |
| Apples            |      |      |      |      |     |      | ▸    | ●    | ●     | ●    |      |      |
| Apricots          |      |      |      |      | ●   | ●    | ◐    |      |       |      |      |      |
| Boysenberries     |      |      |      |      |     | ●    | ◐    |      |       |      |      |      |
| Olallieberries    |      |      |      |      |     | ●    | ●    | ●    |       |      |      |      |
| Cherries          |      |      |      |      | ▸   | ◐    |      |      |       |      |      |      |
| Dates             |      |      |      |      |     |      |      |      |       | ●    | ●    | ◐    |
| Figs              |      |      |      |      |     | ▸    | ●    | ●    | ◐     |      |      |      |
| Grapefruit        | ●    | ●    | ●    | ●    | ●   | ●    | ●    | ●    | ●     | ◐    | ▸    | ●    |
| Grapes            |      |      |      |      | ▸   | ●    | ●    | ●    | ●     | ●    | ◐    |      |
| Kiwifruit         | ●    | ●    | ●    | ●    | ●   |      |      |      |       | ●    | ●    | ●    |
| Lemons            | ●    | ●    | ●    | ●    | ●   | ●    | ●    | ●    | ●     | ●    | ●    | ●    |
| Cantaloupe        |      |      |      |      | ▸   | ●    | ●    | ●    | ●     | ●    | ●    |      |
| Melons, Honeydew  |      |      |      |      |     | ▸    | ●    | ●    | ●     | ●    | ●    |      |
| Melons, Persian   |      |      |      |      |     | ▸    | ●    | ●    | ●     | ●    |      |      |
| Oranges, Navel    | ●    | ●    | ●    | ●    | ◐   |      |      |      |       |      | ▸    | ●    |
| Oranges, Valencia |      |      |      |      | ▸   | ●    | ●    | ●    | ●     | ◐    |      |      |
| Peaches           |      |      |      |      | ▸   | ●    | ●    | ●    | ◐     |      |      |      |
| Pears             |      |      |      |      |     |      |      | ●    | ●     | ◐    |      |      |
| Plums             |      |      |      |      | ▸   | ●    | ●    | ●    |       |      |      |      |
| Pomegranates      |      |      |      |      |     |      |      |      | ▸     | ●    | ◐    |      |
| Prunes            |      |      |      |      |     |      |      | ▸    | ●     | ◐    |      |      |
| Strawberries      |      | ▸    | ●    | ●    | ●   | ●    | ●    | ●    | ●     | ●    | ◐    |      |
| Tangerines        | ●    | ●    | ●    |      |     |      |      |      |       |      | ●    | ●    |
| Tangelos          | ●    | ●    | ●    |      |     |      |      |      |       |      | ●    | ●    |
| Watermelons       |      |      |      |      | ▸   | ●    | ●    | ●    | ●     | ◐    |      |      |
| <b>VEGETABLES</b> |      |      |      |      |     |      |      |      |       |      |      |      |
| Artichokes        | ●    | ●    | ●    | ●    | ●   | ●    | ●    | ●    | ●     | ●    | ●    | ●    |
| Asparagus         |      | ▸    | ●    | ●    | ●   | ●    |      |      |       |      |      |      |
| Avocados          | ●    | ●    | ●    | ●    | ●   | ●    | ●    | ●    | ●     | ●    | ●    | ●    |
| Beans, Dry        |      |      |      |      |     |      |      | ▸    | ●     | ●    | ◐    |      |
| Beans, Snap       |      |      |      | ●    | ●   | ●    | ●    | ●    | ●     | ●    | ●    | ◐    |
| Broccoli          | ●    | ●    | ●    | ●    | ●   | ●    | ●    | ●    | ●     | ●    | ●    | ●    |
| Brussels Sprouts  | ●    | ●    | ◐    |      |     |      |      | ●    | ●     | ●    | ●    | ●    |
| Cabbage           | ●    | ●    | ●    | ●    | ●   | ●    | ●    | ●    | ●     | ●    | ●    | ●    |
| Carrots           | ●    | ●    | ●    | ●    | ●   | ●    | ●    | ●    | ●     | ●    | ●    | ●    |
| Cauliflower       | ●    | ●    | ●    | ●    | ●   | ●    | ●    | ●    | ●     | ●    | ●    | ●    |
| Celery            | ●    | ●    | ●    | ●    | ●   | ●    | ●    | ●    | ●     | ●    | ●    | ●    |
| Corn              |      |      |      |      | ●   | ●    | ●    | ●    | ●     | ●    | ●    | ◐    |
| Cucumbers         |      |      | ▸    | ●    | ●   | ●    | ●    | ●    | ●     | ●    | ●    |      |
| Garlic            |      |      |      | ●    | ●   | ●    | ●    | ●    | ◐     |      |      |      |
| Lettuce           | ●    | ●    | ●    | ●    | ●   | ●    | ●    | ●    | ●     | ●    | ●    | ●    |
| Mushrooms         | ●    | ●    | ●    | ●    | ●   | ●    | ●    | ●    | ●     | ●    | ●    | ●    |
| Onions            |      |      |      | ●    | ●   | ●    | ●    | ●    | ●     | ●    |      |      |
| Peppers, Green    |      |      |      |      |     |      | ●    | ●    | ●     | ●    | ●    | ◐    |
| Peppers, Chili    |      |      |      |      |     |      |      |      | ●     | ●    | ●    | ◐    |
| Potatoes          | ●    | ●    | ●    | ●    | ●   | ●    | ●    | ●    | ●     | ◐    | ▸    | ●    |
| Potatoes, Sweet   |      |      |      |      |     |      | ▸    | ●    | ●     | ●    | ◐    |      |
| Spinach           | ●    | ●    | ●    | ●    | ●   | ●    | ●    | ●    | ●     | ●    | ●    | ●    |
| Squash            | ●    | ●    | ●    | ●    | ●   | ●    | ●    | ●    | ●     | ●    | ●    | ●    |
| Tomatoes          |      |      |      |      | ▸   | ●    | ●    | ●    | ●     | ●    | ●    | ●    |

● = Full Month

◐ = 1st Half of Month

▸ = 2nd Half of Month

## CALIFORNIA 1995 FARM FACTS

- About 11.6% of the national gross cash receipts for farming are produced in California on 80,000 farms.
- This constitutes 3.9% of the Nation's total farms (based on the Census of Agriculture definition of farms as places with annual sales of agricultural products of \$1,000 or more).

### CALIFORNIA NUMBER OF FARMS, LAND IN FARMS, AND SIZE OF FARM, 1950-95

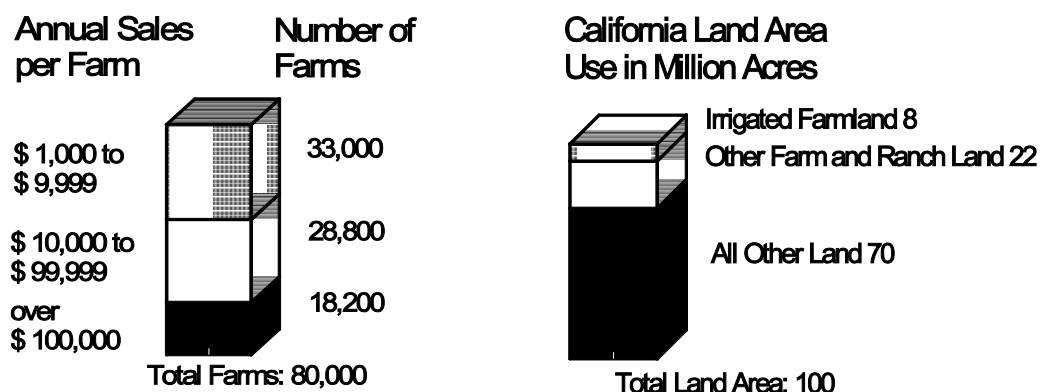

### CALIFORNIA NUMBER OF FARMS, LAND IN FARMS, AND SIZE OF FARM -- 1950-1995

| Year           | Number of Farms | Land in Farms | Average Size of Farm |
|----------------|-----------------|---------------|----------------------|
|                |                 | 1,000 Acres   | Acres                |
| 1950 <u>a/</u> | 144,000         | 37,500        | 260                  |
| 1955           | 124,000         | 39,000        | 316                  |
| 1960           | 108,000         | 38,800        | 359                  |
| 1965           | 82,000          | 37,800        | 461                  |
| 1970           | 64,000          | 36,600        | 572                  |
| 1975 <u>b/</u> | 73,000          | 34,300        | 470                  |
| 1980           | 81,000          | 33,800        | 417                  |
| 1985           | 79,000          | 32,900        | 416                  |
| 1986           | 79,000          | 32,800        | 415                  |
| 1987           | 83,000          | 31,900        | 384                  |
| 1988           | 84,000          | 31,600        | 376                  |
| 1989           | 84,000          | 31,300        | 373                  |
| 1990           | 85,000          | 30,800        | 362                  |
| 1991           | 83,000          | 30,500        | 367                  |
| 1992           | 82,000          | 30,200        | 368                  |
| 1993           | 79,000          | 30,000        | 380                  |
| 1994           | 79,000          | 29,900        | 378                  |
| 1995           | 80,000          | 30,000        | 375                  |

a/ Old definition of farm: Places of 10 or more acres that had annual sales of agricultural products of \$50 or more and places of less than 10 acres that had annual sales of \$250 or more.

b/ New definition of farm: Places with annual sales of agricultural products of \$1,000 or more.



## PROFILE OF CALIFORNIA'S AGRICULTURE

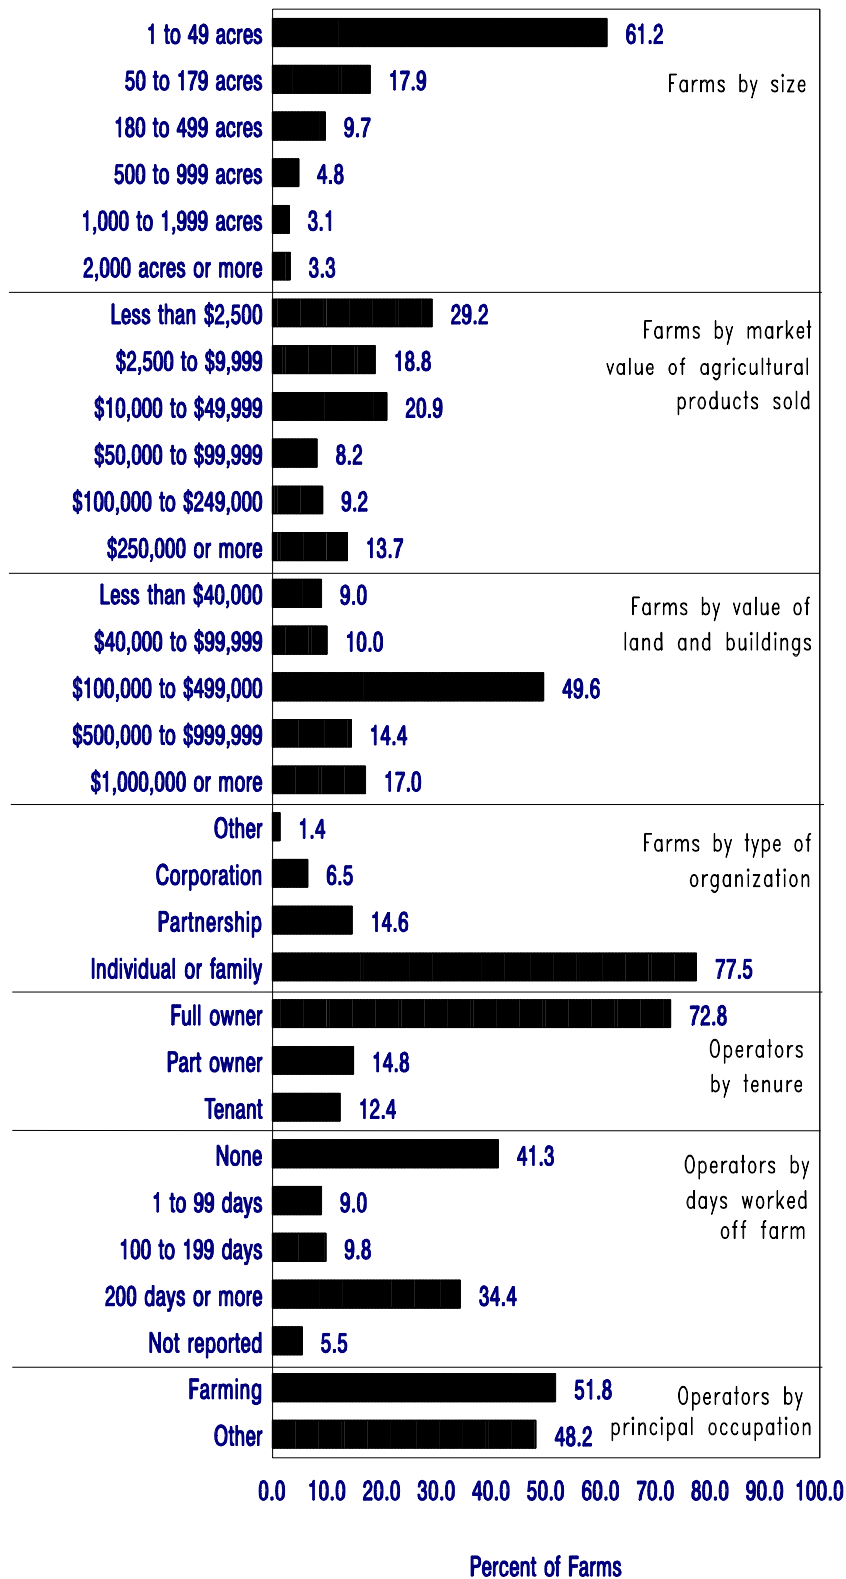

SOURCE: 1992 Census of Agriculture

# CALIFORNIA FIELD CROPS

## SUMMARY OF FIELD CROPS

California's 1995 field crop production was worth \$3.51 billion at the farm-gate level. This value was 2% below the previous year.

Alfalfa, wheat, Upland cotton, cottonseed and oats recorded significantly lower farm returns. Although wheat prices were up, production was down considerably. The declining production was primarily due to widespread flooding in the Sacramento Valley, and persistent wet conditions which led to disease problems. Upland cotton prices were up slightly, but production was off dramatically. This was caused by the cool, wet spring and heavy insect damage throughout the growing season.

Rice, barley, potatoes, sweet potatoes, other hay, and American Pima cotton showed significantly higher farm values, which nearly offset the declines in wheat and Upland cotton. Rice, barley and potato production were down, but sharply higher prices helped push their total values above 1994 levels. For sweet potatoes and American Pima cotton, production and prices were considerably higher than the previous year.

The average value per harvested acre in 1995 dropped to \$670 from the \$700 per acre value in 1994.

Production of the major field crops totaled 26.8 million tons, up fractionally from the 26.7 million tons produced on 1994. Harvested acreage was higher than the previous year for cotton, dry beans, corn for silage, hay and sweet potatoes. Wheat, rice, barley, corn for grain, sugarbeets and potatoes showed declines in harvested acreage.

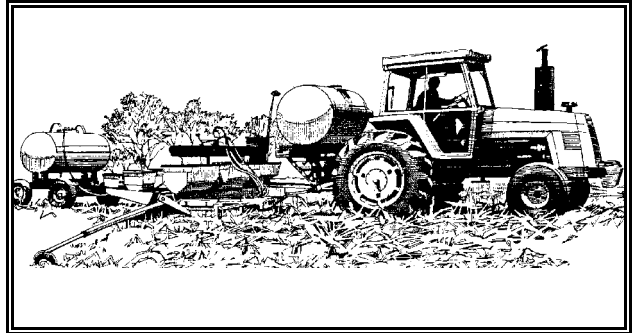

Upland cotton was again the state's highest valued field crop with a total value of \$927 million. Nationally, California ranked second in Upland cotton production with 2.31 million bales produced, at an average price of 83.5 cents per pound.

All hay was California's second leading field crop, with a total value of \$841 million. At the U.S. level, the state ranked second in the production of all hay with a total of 9.00 million tons.

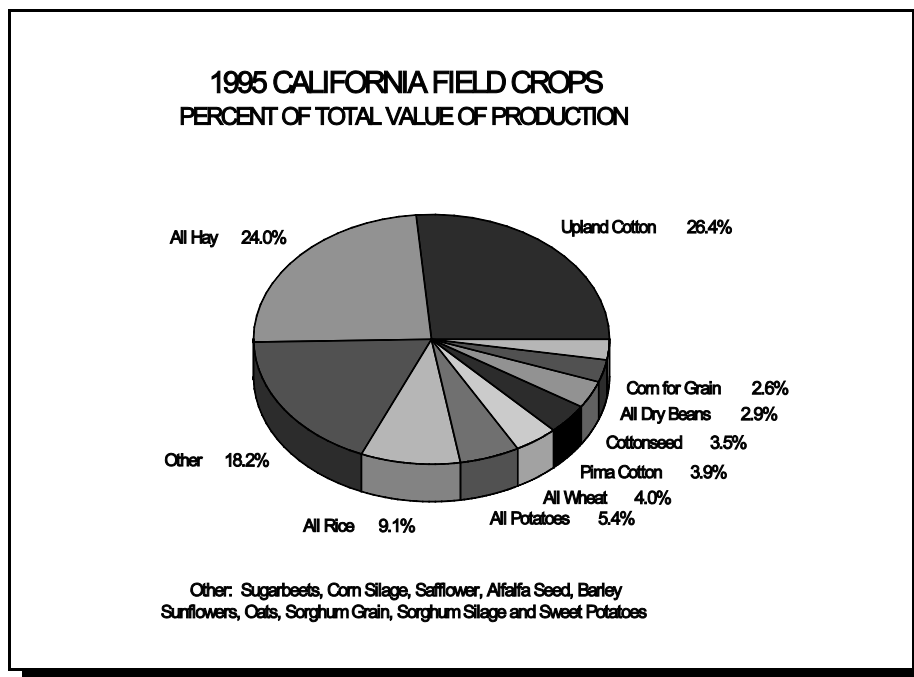

**CALIFORNIA FIELD CROPS: Acreage, Production, Price And Value, 1986-95**

| Year                        | Acreage                |              | Yield Per Acre | Production    | Average Value Per Unit  | Value of Production |
|-----------------------------|------------------------|--------------|----------------|---------------|-------------------------|---------------------|
|                             | Planted                | Harvested    |                |               |                         |                     |
| Alfalfa Seed <u>a/</u>      |                        |              |                |               |                         |                     |
|                             | <i>Acres <u>d/</u></i> | <i>Acres</i> | <i>Pounds</i>  | <i>Pounds</i> | <i>Dollars Per Cwt.</i> | <i>\$1,000</i>      |
| 1986                        | ---                    | 93,000       | 500            | 46,500,000    | 92.00                   | 42,780              |
| 1987                        | ---                    | 67,000       | 605            | 40,541,000    | 108.00                  | 43,784              |
| 1988                        | ---                    | 67,000       | 529            | 35,466,000    | 120.00                  | 42,559              |
| 1989                        | ---                    | 67,000       | 489            | 32,755,000    | 130.00                  | 42,582              |
| 1990                        | ---                    | 71,000       | 494            | 35,065,000    | 144.00                  | 50,494              |
| 1991                        | ---                    | 68,000       | 603            | 41,012,000    | 123.00                  | 50,445              |
| 1992                        | ---                    | 46,000       | 664            | 30,548,000    | 112.00                  | 34,214              |
| 1993 <u>b/</u>              | ---                    | ---          | ---            | ---           | ---                     | ---                 |
| 1994 <u>b/</u>              | ---                    | ---          | ---            | ---           | ---                     | ---                 |
| 1995 <u>b/</u>              | ---                    | ---          | ---            | ---           | ---                     | ---                 |
| Barley                      |                        |              |                |               |                         |                     |
|                             | <i>Acres</i>           | <i>Acres</i> | <i>Tons</i>    | <i>Tons</i>   | <i>Dollars Per Ton</i>  | <i>\$1,000</i>      |
| 1986                        | 470,000                | 400,000      | 1.42           | 566,400       | 85.83                   | 48,616              |
| 1987                        | 400,000                | 330,000      | 1.30           | 427,700       | 89.58                   | 38,313              |
| 1988                        | 360,000                | 280,000      | 1.46           | 409,900       | 114.58                  | 46,970              |
| 1989                        | 320,000                | 250,000      | 1.39           | 348,000       | 110.83                  | 38,570              |
| 1990                        | 300,000                | 230,000      | 1.39           | 320,200       | 109.17                  | 34,951              |
| 1991                        | 240,000                | 160,000      | 1.42           | 226,600       | 105.82                  | 23,978              |
| 1992                        | 230,000                | 190,000      | 1.49           | 282,700       | 107.09                  | 30,275              |
| 1993                        | 250,000                | 200,000      | 1.56           | 312,000       | 105.00                  | 32,760              |
| 1994                        | 290,000                | 220,000      | 1.56           | 343,200       | 111.25                  | 38,181              |
| 1995                        | 260,000                | 200,000      | 1.68           | 336,000       | 135.42                  | 45,500              |
| Beans, Dry Edible <u>c/</u> |                        |              |                |               |                         |                     |
|                             | <i>Acres</i>           | <i>Acres</i> | <i>Cwt.</i>    | <i>Cwt.</i>   | <i>Dollars Per Cwt.</i> | <i>\$1,000</i>      |
| 1986                        | 157,000                | 155,000      | 18.46          | 2,862,000     | 28.50                   | 81,567              |
| 1987                        | 172,000                | 168,000      | 18.68          | 3,138,000     | 27.50                   | 86,295              |
| 1988                        | 151,000                | 147,000      | 19.63          | 2,885,000     | 36.20                   | 104,437             |
| 1989                        | 185,000                | 180,000      | 18.65          | 3,357,000     | 34.80                   | 116,824             |
| 1990                        | 175,000                | 166,000      | 18.42          | 3,058,000     | 30.90                   | 94,492              |
| 1991                        | 153,000                | 150,000      | 21.57          | 3,235,000     | 26.20                   | 84,757              |
| 1992                        | 121,000                | 117,000      | 20.90          | 2,445,000     | 24.40                   | 59,658              |
| 1993                        | 109,000                | 106,000      | 20.85          | 2,210,000     | 35.30                   | 78,013              |
| 1994                        | 136,000                | 131,000      | 21.15          | 2,771,000     | 34.80                   | 96,431              |
| 1995                        | 145,000                | 137,000      | 21.60          | 2,960,000     | 34.40                   | 101,824             |
| Corn For Grain              |                        |              |                |               |                         |                     |
|                             | <i>Acres</i>           | <i>Acres</i> | <i>Tons</i>    | <i>Tons</i>   | <i>Dollars Per Ton</i>  | <i>\$1,000</i>      |
| 1986                        | 500,000                | 250,000      | 4.26           | 1,064,000     | 76.79                   | 81,700              |
| 1987                        | 423,000                | 221,000      | 4.48           | 990,100       | 86.07                   | 85,218              |
| 1988                        | 375,000                | 187,000      | 4.06           | 759,200       | 112.86                  | 85,683              |
| 1989                        | 380,000                | 185,000      | 4.48           | 828,800       | 107.14                  | 88,800              |
| 1990                        | 375,000                | 160,000      | 4.48           | 716,800       | 108.21                  | 77,568              |
| 1991                        | 330,000                | 115,000      | 4.48           | 515,200       | 110.71                  | 57,040              |
| 1992                        | 375,000                | 150,000      | 4.62           | 693,000       | 101.79                  | 70,538              |
| 1993                        | 400,000                | 170,000      | 4.62           | 785,400       | 113.93                  | 89,480              |
| 1994                        | 420,000                | 180,000      | 4.76           | 856,800       | 106.43                  | 91,188              |
| 1995                        | 435,000                | 150,000      | 4.48           | 672,000       | 137.50                  | 92,400              |

See Footnotes on Page 58.

**CALIFORNIA FIELD CROPS: Acreage, Production, Price And Value, 1986-95**

| Year                  | Acreage   |           | Yield Per Acre | Production | Average Value Per Unit | Value of Production |
|-----------------------|-----------|-----------|----------------|------------|------------------------|---------------------|
|                       | Planted   | Harvested |                |            |                        |                     |
| Corn For Silage       |           |           |                |            |                        |                     |
|                       | Acres d/  | Acres     | Tons           | Tons       | Dollars Per Ton d/     | \$1,000 d/          |
| 1986                  | ---       | 243,000   | 24             | 5,832,000  | ---                    | ---                 |
| 1987                  | ---       | 196,000   | 26             | 5,096,000  | ---                    | ---                 |
| 1988                  | ---       | 182,000   | 23             | 4,186,000  | ---                    | ---                 |
| 1989                  | ---       | 189,000   | 24             | 4,536,000  | ---                    | ---                 |
| 1990                  | ---       | 210,000   | 25             | 5,250,000  | ---                    | ---                 |
| 1991                  | ---       | 210,000   | 25             | 5,250,000  | ---                    | ---                 |
| 1992                  | ---       | 220,000   | 25             | 5,500,000  | ---                    | ---                 |
| 1993                  | ---       | 225,000   | 25             | 5,625,000  | ---                    | ---                 |
| 1994                  | ---       | 235,000   | 25             | 5,875,000  | ---                    | ---                 |
| 1995                  | ---       | 280,000   | 25             | 7,000,000  | ---                    | ---                 |
| Cotton, All           |           |           |                |            |                        |                     |
|                       | Acres     | Acres     | Pounds         | Bales e/   | Cents Per Lb.          | \$1,000             |
| 1986                  | 1,000,000 | 990,000   | 1,088          | 2,245,000  | 59.1                   | 636,862             |
| 1987                  | 1,150,900 | 1,140,900 | 1,258          | 2,991,200  | 68.9                   | 989,663             |
| 1988                  | 1,351,800 | 1,336,800 | 1,015          | 2,827,200  | 64.8                   | 878,833             |
| 1989                  | 1,068,000 | 1,057,900 | 1,226          | 2,701,200  | 72.2                   | 935,534             |
| 1990                  | 1,125,700 | 1,115,500 | 1,201          | 2,791,400  | 77.5                   | 1,038,655           |
| 1991                  | 1,044,000 | 1,041,000 | 1,242          | 2,694,200  | 68.2                   | 882,054             |
| 1992                  | 1,110,000 | 1,105,000 | 1,351          | 3,110,700  | 62.3                   | 930,357             |
| 1993                  | 1,141,000 | 1,136,000 | 1,324          | 3,132,600  | 67.0                   | 1,006,747           |
| 1994                  | 1,181,000 | 1,175,800 | 1,185          | 2,901,800  | 81.5                   | 1,137,718           |
| 1995                  | 1,285,000 | 1,280,000 | 951            | 2,536,500  | 87.4                   | 1,063,505           |
| Cotton, American-Pima |           |           |                |            |                        |                     |
|                       | Acres     | Acres     | Pounds         | Bales e/   | Cents Per Lb.          | \$1,000             |
| 1986 d/               | ---       | ---       | ---            | ---        | ---                    | ---                 |
| 1987                  | 900       | 900       | 1,173          | 2,200      | 104.0                  | 1,098               |
| 1988                  | 1,800     | 1,800     | 853            | 3,200      | 118.0                  | 1,812               |
| 1989                  | 18,000    | 17,900    | 1,078          | 40,200     | 95.6                   | 18,447              |
| 1990                  | 25,700    | 25,500    | 1,080          | 57,400     | 107.0                  | 29,481              |
| 1991                  | 64,000    | 64,000    | 1,097          | 146,200    | 96.2                   | 67,509              |
| 1992                  | 110,000   | 110,000   | 1,282          | 293,700    | 78.7                   | 110,948             |
| 1993                  | 91,000    | 91,000    | 1,132          | 214,600    | 84.0                   | 86,527              |
| 1994                  | 81,000    | 80,800    | 1,098          | 184,800    | 102.0                  | 90,478              |
| 1995                  | 115,000   | 115,000   | 937            | 224,500    | 127.0                  | 136,855             |
| Cotton, Upland        |           |           |                |            |                        |                     |
|                       | Acres     | Acres     | Pounds         | Bales e/   | Cents Per Lb.          | \$1,000             |
| 1986                  | 1,000,000 | 990,000   | 1,088          | 2,245,000  | 59.1                   | 636,862             |
| 1987                  | 1,150,000 | 1,140,000 | 1,259          | 2,989,000  | 69.6                   | 988,565             |
| 1988                  | 1,350,000 | 1,335,000 | 1,015          | 2,824,000  | 64.7                   | 877,021             |
| 1989                  | 1,050,000 | 1,040,000 | 1,228          | 2,661,000  | 71.8                   | 917,087             |
| 1990                  | 1,100,000 | 1,090,000 | 1,204          | 2,734,000  | 76.9                   | 1,009,174           |
| 1991                  | 980,000   | 977,000   | 1,252          | 2,548,000  | 66.6                   | 814,545             |
| 1992                  | 1,000,000 | 995,000   | 1,359          | 2,817,000  | 60.5                   | 819,409             |
| 1993                  | 1,050,000 | 1,045,000 | 1,340          | 2,918,000  | 65.7                   | 920,220             |
| 1994                  | 1,100,000 | 1,095,000 | 1,191          | 2,717,000  | 80.3                   | 1,047,240           |
| 1995                  | 1,170,000 | 1,165,000 | 953            | 2,312,000  | 83.5                   | 926,650             |

See Footnotes on Page 58.

**CALIFORNIA FIELD CROPS: Acreage, Production, Price And Value, 1986-95**

| Year         | Acreage         |                 | Yield Per Acre | Production  | Average Value Per Unit | Value of Production |
|--------------|-----------------|-----------------|----------------|-------------|------------------------|---------------------|
|              | Planted         | Harvested       |                |             |                        |                     |
| Cottonseed   |                 |                 |                |             |                        |                     |
|              | <i>Acres d/</i> | <i>Acres d/</i> | <i>Tons d/</i> | <i>Tons</i> | <i>Dollars Per Ton</i> | <i>\$1,000</i>      |
| 1986         | ---             | ---             | ---            | 875,000     | 102.00                 | 89,250              |
| 1987         | ---             | ---             | ---            | 1,151,800   | 89.50                  | 103,086             |
| 1988         | ---             | ---             | ---            | 1,116,300   | 147.00                 | 164,096             |
| 1989         | ---             | ---             | ---            | 1,040,000   | 93.50                  | 97,240              |
| 1990         | ---             | ---             | ---            | 1,079,000   | 148.00                 | 159,692             |
| 1991         | ---             | ---             | ---            | 1,073,000   | 104.00                 | 111,592             |
| 1992         | ---             | ---             | ---            | 1,148,000   | 120.00                 | 137,760             |
| 1993         | ---             | ---             | ---            | 1,142,000   | 132.00                 | 150,744             |
| 1994         | ---             | ---             | ---            | 1,063,000   | 143.00                 | 152,009             |
| 1995         | ---             | ---             | ---            | 940,000     | 132.00                 | 124,080             |
| Hay, All     |                 |                 |                |             |                        |                     |
|              | <i>Acres d/</i> | <i>Acres</i>    | <i>Tons</i>    | <i>Tons</i> | <i>Dollars Per Ton</i> | <i>\$1,000</i>      |
| 1986         | ---             | 1,680,000       | 5.14           | 8,628,000   | 72.50                  | 625,530             |
| 1987         | ---             | 1,620,000       | 5.30           | 8,586,000   | 77.50                  | 665,415             |
| 1988         | ---             | 1,680,000       | 5.15           | 8,652,000   | 94.00                  | 813,288             |
| 1989 f/      | ---             | 1,670,000       | 5.10           | 8,524,000   | 100.00                 | 828,888             |
| 1990 f/      | ---             | 1,630,000       | 5.10           | 8,307,000   | 101.00                 | 828,531             |
| 1991 f/      | ---             | 1,680,000       | 5.13           | 8,610,000   | 80.50                  | 678,458             |
| 1992 f/      | ---             | 1,450,000       | 5.35           | 7,755,000   | 79.50                  | 600,006             |
| 1993 f/      | ---             | 1,380,000       | 5.50           | 7,590,000   | 102.00                 | 758,448             |
| 1994 f/      | ---             | 1,470,000       | 5.59           | 8,210,000   | 107.00                 | 853,220             |
| 1995 f/      | ---             | 1,600,000       | 5.63           | 9,000,000   | 98.50                  | 841,200             |
| Hay, Alfalfa |                 |                 |                |             |                        |                     |
|              | <i>Acres d/</i> | <i>Acres</i>    | <i>Tons</i>    | <i>Tons</i> | <i>Dollars Per Ton</i> | <i>\$1,000</i>      |
| 1986         | ---             | 1,080,000       | 6.60           | 7,128,000   | d/                     | d/                  |
| 1987         | ---             | 1,080,000       | 6.70           | 7,236,000   | d/                     | d/                  |
| 1988         | ---             | 1,100,000       | 6.60           | 7,260,000   | d/                     | d/                  |
| 1989         | ---             | 1,020,000       | 6.70           | 6,834,000   | 102.00                 | 697,068             |
| 1990         | ---             | 1,060,000       | 6.60           | 6,996,000   | 104.00                 | 727,584             |
| 1991         | ---             | 1,050,000       | 6.70           | 7,035,000   | 82.00                  | 576,870             |
| 1992         | ---             | 960,000         | 6.70           | 6,432,000   | 83.00                  | 533,856             |
| 1993         | ---             | 920,000         | 6.90           | 6,348,000   | 105.00                 | 666,540             |
| 1994         | ---             | 950,000         | 7.00           | 6,650,000   | 112.00                 | 744,800             |
| 1995         | ---             | 1,000,000       | 6.90           | 6,900,000   | 100.00                 | 690,000             |
| Hay, Other   |                 |                 |                |             |                        |                     |
|              | <i>Acres d/</i> | <i>Acres</i>    | <i>Tons</i>    | <i>Tons</i> | <i>Dollars Per Ton</i> | <i>\$1,000</i>      |
| 1986         | ---             | 600,000         | 2.50           | 1,500,000   | d/                     | d/                  |
| 1987         | ---             | 540,000         | 2.50           | 1,350,000   | d/                     | d/                  |
| 1988         | ---             | 580,000         | 2.40           | 1,392,000   | d/                     | d/                  |
| 1989         | ---             | 650,000         | 2.60           | 1,690,000   | 78.00                  | 131,820             |
| 1990         | ---             | 570,000         | 2.30           | 1,311,000   | 77.00                  | 100,947             |
| 1991         | ---             | 630,000         | 2.50           | 1,575,000   | 64.50                  | 101,588             |
| 1992         | ---             | 490,000         | 2.70           | 1,323,000   | 50.00                  | 66,150              |
| 1993         | ---             | 460,000         | 2.70           | 1,242,000   | 74.00                  | 91,908              |
| 1994         | ---             | 520,000         | 3.00           | 1,560,000   | 69.50                  | 108,420             |
| 1995         | ---             | 600,000         | 3.50           | 2,100,000   | 72.00                  | 151,200             |

See Footnotes on Page 58.

**CALIFORNIA FIELD CROPS: Acreage, Production, Price And Value, 1986-95**

| Year             | Acreage |           | Yield Per Acre | Production | Average Value Per Unit | Value of Production |
|------------------|---------|-----------|----------------|------------|------------------------|---------------------|
|                  | Planted | Harvested |                |            |                        |                     |
| Oats             |         |           |                |            |                        |                     |
|                  | Acres   | Acres     | Tons           | Tons       | Dollars Per Ton        | \$1,000             |
| 1986             | 360,000 | 45,000    | 1.12           | 50,400     | 95.63                  | 4,820               |
| 1987             | 380,000 | 40,000    | 1.12           | 44,800     | 112.50                 | 5,040               |
| 1988             | 365,000 | 35,000    | 1.25           | 43,700     | 153.13                 | 6,689               |
| 1989             | 400,000 | 45,000    | 1.20           | 54,000     | 103.75                 | 5,603               |
| 1990             | 380,000 | 45,000    | 1.20           | 54,000     | 101.25                 | 5,468               |
| 1991             | 380,000 | 45,000    | 1.20           | 54,000     | 96.26                  | 5,198               |
| 1992             | 380,000 | 35,000    | 1.28           | 44,800     | 103.13                 | 4,620               |
| 1993             | 300,000 | 30,000    | 1.28           | 38,400     | 115.63                 | 4,440               |
| 1994             | 310,000 | 30,000    | 1.28           | 38,400     | 183.13                 | 7,032               |
| 1995             | 350,000 | 30,000    | 1.36           | 40,800     | 128.13                 | 5,228               |
| Potatoes, All    |         |           |                |            |                        |                     |
|                  | Acres   | Acres     | Cwt.           | Cwt.       | Dollars Per Cwt.       | \$1,000             |
| 1986             | 48,400  | 48,400    | 381            | 18,451,000 | 7.85                   | 144,136             |
| 1987             | 50,800  | 50,600    | 376            | 19,039,000 | 8.45                   | 158,908             |
| 1988             | 47,200  | 47,200    | 355            | 16,765,000 | 9.15                   | 153,136             |
| 1989             | 48,700  | 48,700    | 366            | 17,831,000 | 11.40                  | 203,038             |
| 1990             | 50,300  | 50,300    | 359            | 18,082,000 | 10.00                  | 178,769             |
| 1991             | 46,200  | 45,200    | 362            | 16,361,000 | 9.90                   | 160,293             |
| 1992             | 43,000  | 42,900    | 363            | 15,592,000 | 9.85                   | 153,097             |
| 1993             | 41,900  | 41,500    | 360            | 14,932,000 | 12.40                  | 184,559             |
| 1994             | 44,700  | 44,700    | 368            | 16,467,000 | 10.60                  | 172,086             |
| 1995             | 41,500  | 41,300    | 354            | 14,620,000 | 13.10                  | 190,894             |
| Potatoes, Winter |         |           |                |            |                        |                     |
|                  | Acres   | Acres     | Cwt.           | Cwt.       | Dollars Per Cwt.       | \$1,000             |
| 1986             | 5,100   | 5,100     | 290            | 1,479,000  | 7.00                   | 10,353              |
| 1987             | 4,600   | 4,600     | 235            | 1,081,000  | 11.30                  | 12,215              |
| 1988             | 5,200   | 5,200     | 230            | 1,196,000  | 10.40                  | 12,438              |
| 1989             | 5,500   | 5,500     | 240            | 1,320,000  | 16.10                  | 21,252              |
| 1990             | 5,500   | 5,500     | 230            | 1,265,000  | 24.40                  | 30,866              |
| 1991             | 5,600   | 4,600     | 245            | 1,127,000  | 17.10                  | 19,272              |
| 1992             | 5,300   | 5,300     | 260            | 1,378,000  | 14.10                  | 19,430              |
| 1993             | 5,600   | 5,200     | 200            | 1,040,000  | 20.20                  | 21,008              |
| 1994             | 4,500   | 4,500     | 215            | 968,000    | 21.10                  | 20,425              |
| 1995             | 5,000   | 5,000     | 260            | 1,300,000  | 18.20                  | 23,660              |
| Potatoes, Spring |         |           |                |            |                        |                     |
|                  | Acres   | Acres     | Cwt.           | Cwt.       | Dollars Per Cwt.       | \$1,000             |
| 1986             | 19,500  | 19,500    | 390            | 7,605,000  | 8.55                   | 65,023              |
| 1987             | 21,300  | 21,300    | 370            | 7,881,000  | 11.50                  | 90,632              |
| 1988             | 19,600  | 19,600    | 385            | 7,546,000  | 8.90                   | 67,159              |
| 1989             | 21,000  | 21,000    | 375            | 7,875,000  | 11.00                  | 86,625              |
| 1990             | 22,500  | 22,500    | 375            | 8,438,000  | 10.50                  | 88,599              |
| 1991             | 21,800  | 21,800    | 380            | 8,284,000  | 12.60                  | 104,378             |
| 1992             | 19,300  | 19,300    | 375            | 7,238,000  | 9.20                   | 66,590              |
| 1993             | 19,500  | 19,500    | 385            | 7,508,000  | 13.00                  | 97,604              |
| 1994             | 20,500  | 20,500    | 380            | 7,790,000  | 11.60                  | 90,364              |
| 1995             | 18,000  | 17,800    | 350            | 6,230,000  | 13.60                  | 84,728              |

See Footnotes on Page 58.

**CALIFORNIA FIELD CROPS: Acreage, Production, Price And Value, 1986-95**

| Year             | Acreage |           | Yield Per Acre | Production | Average Value Per Unit | Value of Production |
|------------------|---------|-----------|----------------|------------|------------------------|---------------------|
|                  | Planted | Harvested |                |            |                        |                     |
| Potatoes, Summer |         |           |                |            |                        |                     |
|                  | Acres   | Acres     | Cwt.           | Cwt.       | Dollars Per Cwt.       | \$1,000             |
| 1986             | 6,800   | 6,800     | 365            | 2,482,000  | 9.95                   | 24,696              |
| 1987             | 6,600   | 6,400     | 345            | 2,208,000  | 10.60                  | 23,405              |
| 1988             | 5,900   | 5,900     | 325            | 1,918,000  | 12.40                  | 23,783              |
| 1989             | 6,100   | 6,100     | 360            | 2,196,000  | 18.70                  | 41,065              |
| 1990             | 5,300   | 5,300     | 330            | 1,749,000  | 12.30                  | 21,513              |
| 1991             | 4,800   | 4,800     | 325            | 1,560,000  | 8.85                   | 14,274              |
| 1992             | 4,400   | 4,300     | 320            | 1,376,000  | 14.60                  | 23,117              |
| 1993             | 4,800   | 4,800     | 330            | 1,584,000  | 13.30                  | 21,067              |
| 1994             | 5,700   | 5,700     | 370            | 2,109,000  | 13.00                  | 27,417              |
| 1995             | 5,500   | 5,500     | 320            | 1,760,000  | 17.20                  | 30,272              |
| Potatoes, Fall   |         |           |                |            |                        |                     |
|                  | Acres   | Acres     | Cwt.           | Cwt.       | Dollars Per Cwt.       | \$1,000             |
| 1986             | 17,000  | 17,000    | 405            | 6,885,000  | 6.40                   | 44,064              |
| 1987             | 18,300  | 18,300    | 430            | 7,869,000  | 4.15                   | 32,656              |
| 1988             | 16,500  | 16,500    | 370            | 6,105,000  | 8.15                   | 49,756              |
| 1989             | 16,100  | 16,100    | 400            | 6,440,000  | 8.40                   | 54,096              |
| 1990             | 17,000  | 17,000    | 390            | 6,630,000  | 5.70                   | 37,791              |
| 1991             | 14,000  | 14,000    | 385            | 5,390,000  | 4.15                   | 22,369              |
| 1992             | 14,000  | 14,000    | 400            | 5,600,000  | 7.85                   | 43,960              |
| 1993             | 12,000  | 12,000    | 400            | 4,800,000  | 9.35                   | 44,880              |
| 1994             | 14,000  | 14,000    | 400            | 5,600,000  | 6.05                   | 33,880              |
| 1995             | 13,000  | 13,000    | 410            | 5,330,000  | 9.80                   | 52,234              |
| Rice, All g/     |         |           |                |            |                        |                     |
|                  | Acres   | Acres     | Cwt.           | Cwt.       | Dollars Per Cwt.       | \$1,000             |
| 1986             | 363,000 | 360,000   | 77.00          | 27,727,000 | 3.18                   | 88,172              |
| 1987             | 374,000 | 370,000   | 75.50          | 27,935,000 | 6.72                   | 187,723             |
| 1988             | 430,000 | 425,000   | 70.20          | 29,840,000 | 6.15                   | 183,516             |
| 1989             | 415,000 | 410,000   | 79.00          | 32,390,000 | 6.27                   | 203,085             |
| 1990             | 400,000 | 395,000   | 77.00          | 30,429,000 | 5.93                   | 180,444             |
| 1991             | 351,000 | 350,000   | 81.00          | 28,350,000 | 6.65                   | 188,528             |
| 1992             | 396,000 | 394,000   | 85.00          | 33,490,000 | 5.64                   | 188,884             |
| 1993             | 440,000 | 437,000   | 83.00          | 36,271,000 | 8.27                   | 299,961             |
| 1994             | 487,000 | 485,000   | 85.00          | 41,224,000 | 6.97                   | 287,331             |
| 1995             | 467,000 | 465,000   | 76.00          | 35,352,000 | 9.00                   | 318,168             |
| Rice, Long       |         |           |                |            |                        |                     |
|                  | Acres   | Acres     | Cwt.           | Cwt.       | Dollars/Cwt. d/        | \$1,000 d/          |
| 1986             | 20,000  | 20,000    | 76.00          | 1,520,000  | ---                    | ---                 |
| 1987             | 36,000  | 36,000    | 72.00          | 2,592,000  | ---                    | ---                 |
| 1988             | 60,000  | 60,000    | 70.00          | 4,200,000  | ---                    | ---                 |
| 1989             | 30,000  | 30,000    | 75.00          | 2,250,000  | ---                    | ---                 |
| 1990             | 18,000  | 18,000    | 73.00          | 1,314,000  | ---                    | ---                 |
| 1991             | 16,000  | 16,000    | 73.00          | 1,168,000  | ---                    | ---                 |
| 1992             | 15,000  | 15,000    | 80.00          | 1,200,000  | ---                    | ---                 |
| 1993             | 14,000  | 14,000    | 81.80          | 1,145,000  | ---                    | ---                 |
| 1994             | 7,000   | 7,000     | 81.00          | 567,000    | ---                    | ---                 |
| 1995             | 8,000   | 8,000     | 75.00          | 600,000    | ---                    | ---                 |

See Footnotes on Page 58.

**CALIFORNIA FIELD CROPS: Acreage, Production, Price And Value, 1986-95**

| Year                  | Acreage |           | Yield Per Acre | Production | Average Value Per Unit | Value of Production |
|-----------------------|---------|-----------|----------------|------------|------------------------|---------------------|
|                       | Planted | Harvested |                |            |                        |                     |
| Rice, Medium          |         |           |                |            |                        |                     |
|                       | Acres   | Acres     | Cwt.           | Cwt.       | Dollars/Cwt. <u>d/</u> | \$1,000 <u>d/</u>   |
| 1986                  | 288,000 | 285,000   | 76.90          | 21,917,000 | ---                    | ---                 |
| 1987                  | 299,000 | 295,000   | 76.00          | 22,496,000 | ---                    | ---                 |
| 1988                  | 320,000 | 315,000   | 70.00          | 22,050,000 | ---                    | ---                 |
| 1989                  | 335,000 | 330,000   | 79.75          | 26,315,000 | ---                    | ---                 |
| 1990                  | 370,000 | 365,000   | 77.30          | 28,215,000 | ---                    | ---                 |
| 1991                  | 326,000 | 325,000   | 81.50          | 26,489,000 | ---                    | ---                 |
| 1992                  | 369,000 | 367,000   | 85.40          | 31,342,000 | ---                    | ---                 |
| 1993                  | 413,000 | 410,000   | 83.20          | 34,112,000 | ---                    | ---                 |
| 1994                  | 470,000 | 468,000   | 85.10          | 39,827,000 | ---                    | ---                 |
| 1995                  | 449,000 | 447,000   | 76.00          | 33,972,000 | ---                    | ---                 |
| Rice, Short           |         |           |                |            |                        |                     |
|                       | Acres   | Acres     | Cwt.           | Cwt.       | Dollars/Cwt. <u>d/</u> | \$1,000 <u>d/</u>   |
| 1986                  | 55,000  | 55,000    | 78.00          | 4,290,000  | ---                    | ---                 |
| 1987                  | 39,000  | 39,000    | 73.00          | 2,847,000  | ---                    | ---                 |
| 1988                  | 50,000  | 50,000    | 71.80          | 3,590,000  | ---                    | ---                 |
| 1989                  | 50,000  | 50,000    | 76.50          | 3,825,000  | ---                    | ---                 |
| 1990                  | 12,000  | 12,000    | 75.00          | 900,000    | ---                    | ---                 |
| 1991                  | 9,000   | 9,000     | 77.00          | 693,000    | ---                    | ---                 |
| 1992                  | 12,000  | 12,000    | 79.00          | 948,000    | ---                    | ---                 |
| 1993                  | 13,000  | 13,000    | 78.00          | 1,014,000  | ---                    | ---                 |
| 1994                  | 10,000  | 10,000    | 83.00          | 830,000    | ---                    | ---                 |
| 1995                  | 10,000  | 10,000    | 78.00          | 780,000    | ---                    | ---                 |
| Sugar Beets <u>h/</u> |         |           |                |            |                        |                     |
|                       | Acres   | Acres     | Tons           | Tons       | Dollars Per Ton        | \$1,000             |
| 1986                  | 193,000 | 189,000   | 25.50          | 4,820,000  | 35.70                  | 172,502             |
| 1987                  | 219,000 | 216,000   | 28.20          | 6,091,000  | 33.60                  | 204,658             |
| 1988                  | 215,000 | 212,000   | 25.00          | 5,300,000  | 36.70                  | 194,510             |
| 1989                  | 176,000 | 169,000   | 27.30          | 4,614,000  | 42.30                  | 195,172             |
| 1990                  | 173,000 | 168,000   | 25.80          | 4,334,000  | 41.60                  | 180,294             |
| 1991                  | 165,000 | 158,000   | 25.50          | 4,029,000  | 37.10                  | 149,476             |
| 1992                  | 154,000 | 150,000   | 28.20          | 4,230,000  | 35.90                  | 151,857             |
| 1993                  | 138,000 | 136,000   | 26.00          | 3,536,000  | 35.50                  | 125,528             |
| 1994                  | 143,000 | 141,000   | 28.00          | 3,948,000  | 33.50                  | 132,258             |
| 1995                  | 117,000 | 115,000   | 28.00          | 3,220,000  | i/                     | i/                  |
| Sweet Potatoes        |         |           |                |            |                        |                     |
|                       | Acres   | Acres     | Cwt.           | Cwt.       | Dollars Per Cwt.       | \$1,000             |
| 1986                  | 6,800   | 6,800     | 200            | 1,360,000  | 11.70                  | 15,912              |
| 1987                  | 6,600   | 6,600     | 205            | 1,353,000  | 20.40                  | 27,601              |
| 1988                  | 7,100   | 7,100     | 170            | 1,207,000  | 12.70                  | 15,329              |
| 1989                  | 8,300   | 8,300     | 175            | 1,453,000  | 20.70                  | 30,077              |
| 1990                  | 8,300   | 8,300     | 175            | 1,453,000  | 16.70                  | 24,265              |
| 1991                  | 8,200   | 8,200     | 185            | 1,517,000  | 27.10                  | 41,111              |
| 1992                  | 9,000   | 9,000     | 205            | 1,845,000  | 20.30                  | 37,454              |
| 1993                  | 8,300   | 8,300     | 210            | 1,743,000  | 24.30                  | 42,355              |
| 1994                  | 8,200   | 8,200     | 205            | 1,681,000  | 28.70                  | 48,245              |
| 1995                  | 9,600   | 9,600     | 200            | 1,920,000  | 33.00                  | 63,360              |

See Footnotes on Page 58.



**CALIFORNIA FIELD CROPS: Acreage, Production, Price And Value, 1986-95**

| Year                   | Acreage |           | Yield Per Acre | Production | Average Value Per Unit | Value of Production |
|------------------------|---------|-----------|----------------|------------|------------------------|---------------------|
|                        | Planted | Harvested |                |            |                        |                     |
| Wheat, All             |         |           |                |            |                        |                     |
|                        | Acres   | Acres     | Tons           | Tons       | Dollars Per Ton        | \$1,000             |
| 1986                   | 730,000 | 675,000   | 2.29           | 1,545,800  | 97.33                  | 150,318             |
| 1987                   | 620,000 | 567,000   | 2.32           | 1,316,700  | 96.67                  | 127,133             |
| 1988                   | 590,000 | 549,000   | 2.53           | 1,388,300  | 127.33                 | 176,669             |
| 1989                   | 731,000 | 675,000   | 2.34           | 1,578,200  | 127.33                 | 201,132             |
| 1990                   | 680,000 | 619,000   | 2.33           | 1,445,000  | 110.33                 | 157,871             |
| 1991                   | 483,000 | 442,000   | 2.45           | 1,084,800  | 110.87                 | 120,269             |
| 1992                   | 642,000 | 590,000   | 2.22           | 1,309,100  | 114.88                 | 150,385             |
| 1993                   | 591,000 | 540,000   | 2.35           | 1,269,000  | 107.78                 | 136,779             |
| 1994                   | 650,000 | 569,000   | 2.34           | 1,331,000  | 121.92                 | 162,274             |
| 1995                   | 650,000 | 493,000   | 1.99           | 981,800    | 142.55                 | 139,953             |
| Wheat, Excluding Durum |         |           |                |            |                        |                     |
|                        | Acres   | Acres     | Tons           | Tons       | Dollars Per Ton        | \$1,000             |
| 1986                   | 650,000 | 600,000   | 2.25           | 1,350,000  | 94.33                  | 127,350             |
| 1987                   | 560,000 | 510,000   | 2.28           | 1,162,800  | 94.33                  | 109,691             |
| 1988                   | 530,000 | 490,000   | 2.49           | 1,220,100  | 123.67                 | 150,886             |
| 1989                   | 625,000 | 570,000   | 2.31           | 1,316,700  | 128.00                 | 168,538             |
| 1990                   | 620,000 | 560,000   | 2.28           | 1,276,800  | 107.67                 | 137,469             |
| 1991                   | 450,000 | 410,000   | 2.40           | 984,000    | 110.00                 | 108,240             |
| 1992                   | 585,000 | 535,000   | 2.16           | 1,155,600  | 114.33                 | 132,124             |
| 1993                   | 550,000 | 500,000   | 2.31           | 1,155,000  | 105.00                 | 121,275             |
| 1994                   | 590,000 | 510,000   | 2.28           | 1,162,800  | 117.33                 | 136,435             |
| 1995                   | 580,000 | 425,000   | 1.83           | 777,800    | 136.67                 | 106,293             |
| Wheat, Durum           |         |           |                |            |                        |                     |
|                        | Acres   | Acres     | Tons           | Tons       | Dollars Per Ton        | \$1,000             |
| 1986                   | 80,000  | 75,000    | 2.61           | 195,800    | 117.33                 | 22,968              |
| 1987                   | 60,000  | 57,000    | 2.70           | 153,900    | 113.33                 | 17,442              |
| 1988                   | 60,000  | 59,000    | 2.85           | 168,200    | 153.33                 | 25,783              |
| 1989                   | 106,000 | 105,000   | 2.49           | 261,500    | 124.67                 | 32,594              |
| 1990                   | 60,000  | 59,000    | 2.85           | 168,200    | 121.33                 | 20,402              |
| 1991                   | 33,000  | 32,000    | 3.15           | 100,800    | 119.34                 | 12,029              |
| 1992                   | 57,000  | 55,000    | 2.79           | 153,500    | 118.96                 | 18,261              |
| 1993                   | 41,000  | 40,000    | 2.85           | 114,000    | 136.00                 | 15,504              |
| 1994                   | 60,000  | 59,000    | 2.85           | 168,200    | 153.67                 | 25,839              |
| 1995                   | 70,000  | 68,000    | 3.00           | 204,000    | 165.00                 | 33,660              |

*a/ Production is on a clean basis*

*b/ Estimate discontinued.*

*c/ Excludes beans grown for garden seed.*

*d/ Not estimated.*

*e/ Cotton: 480 lbs. net-weight per bale.*

*f/ Estimated marketings of alfalfa and other hay used as weights to calculate all hay price for 1989-95.*

*g/ Excludes sweet and wild rice.*

*h/ Includes some acreage carried over and harvested the following spring.*

*i/ Not available.*

**CALIFORNIA DRY EDIBLE BEANS: Acreage And Production, 1986-95**

| Year             | Acreage |           | Yield Per Acre | Production (Clean) |
|------------------|---------|-----------|----------------|--------------------|
|                  | Planted | Harvested |                |                    |
| Large Lima       |         |           |                |                    |
|                  | Acres   | Acres     | Pounds         | Cwt.               |
| 1986             | 19,000  | 18,500    | 2,080          | 385,000            |
| 1987             | 22,000  | 21,000    | 2,070          | 435,000            |
| 1988             | 29,000  | 28,000    | 2,050          | 574,000            |
| 1989             | 33,000  | 32,000    | 1,930          | 618,000            |
| 1990             | 24,000  | 23,000    | 2,000          | 460,000            |
| 1991             | 31,000  | 30,000    | 2,270          | 681,000            |
| 1992             | 26,000  | 25,000    | 2,460          | 615,000            |
| 1993             | 15,000  | 15,000    | 2,330          | 350,000            |
| 1994             | 24,000  | 23,500    | 1,830          | 429,000            |
| 1995             | 21,000  | 20,000    | 2,250          | 450,000            |
| Baby Lima        |         |           |                |                    |
|                  | Acres   | Acres     | Pounds         | Cwt.               |
| 1986             | 30,000  | 29,500    | 2,160          | 637,000            |
| 1987             | 22,000  | 21,000    | 2,310          | 485,000            |
| 1988             | 30,000  | 29,000    | 2,320          | 673,000            |
| 1989             | 36,000  | 35,000    | 2,080          | 728,000            |
| 1990             | 25,000  | 25,000    | 2,280          | 570,000            |
| 1991             | 40,000  | 39,000    | 2,500          | 975,000            |
| 1992             | 21,000  | 20,000    | 2,490          | 498,000            |
| 1993             | 14,000  | 14,000    | 2,510          | 351,000            |
| 1994             | 26,000  | 24,500    | 2,490          | 609,000            |
| 1995             | 23,000  | 22,000    | 2,430          | 535,000            |
| Blackeye         |         |           |                |                    |
|                  | Acres   | Acres     | Pounds         | Cwt.               |
| 1986             | 43,000  | 42,000    | 1,730          | 727,000            |
| 1987             | 63,500  | 62,500    | 1,780          | 1,110,000          |
| 1988             | 44,000  | 43,000    | 1,960          | 843,000            |
| 1989             | 40,000  | 39,000    | 2,040          | 797,000            |
| 1990             | 49,000  | 46,000    | 1,970          | 906,000            |
| 1991             | 42,000  | 41,000    | 2,250          | 923,000            |
| 1992             | 23,000  | 22,000    | 2,320          | 510,000            |
| 1993             | 24,000  | 23,000    | 2,380          | 548,000            |
| 1994             | 32,000  | 30,000    | 2,570          | 771,000            |
| 1995             | 44,500  | 43,500    | 2,300          | 1,000,000          |
| Light Red Kidney |         |           |                |                    |
|                  | Acres   | Acres     | Pounds         | Cwt.               |
| 1986             | 27,000  | 27,000    | 1,820          | 491,000            |
| 1987             | 34,500  | 33,500    | 1,800          | 603,000            |
| 1988             | 23,000  | 23,000    | 1,580          | 363,000            |
| 1989             | 38,000  | 37,000    | 1,540          | 571,000            |
| 1990             | 33,000  | 31,000    | 1,620          | 502,000            |
| 1991             | 14,000  | 14,000    | 1,640          | 230,000            |
| 1992             | 20,000  | 19,000    | 1,820          | 346,000            |
| 1993             | 20,000  | 19,000    | 2,120          | 402,000            |
| 1994             | 14,000  | 13,500    | 1,950          | 263,000            |
| 1995             | 13,000  | 12,000    | 1,830          | 220,000            |

See Footnotes on Page 60.

**CALIFORNIA DRY EDIBLE BEANS: Acreage And Production, 1986-95**

| Year            | Acreage |           | Yield Per Acre | Production (Clean) |
|-----------------|---------|-----------|----------------|--------------------|
|                 | Planted | Harvested |                |                    |
| Dark Red Kidney |         |           |                |                    |
|                 | Acres   | Acres     | Pounds         | Cwt.               |
| 1986            | 7,500   | 7,500     | 1,790          | 134,000            |
| 1987            | 11,500  | 11,500    | 1,830          | 210,000            |
| 1988            | 9,000   | 8,000     | 1,950          | 156,000            |
| 1989            | 10,000  | 10,000    | 1,740          | 177,000            |
| 1990            | 15,000  | 14,000    | 1,800          | 252,000            |
| 1991            | 10,000  | 10,000    | 1,670          | 167,000            |
| 1992            | 7,500   | 7,500     | 1,640          | 123,000            |
| 1993            | 7,000   | 7,000     | 1,730          | 121,000            |
| 1994            | 7,000   | 7,000     | 1,790          | 125,000            |
| 1995            | 4,500   | 4,500     | 1,670          | 75,000             |
| Pink            |         |           |                |                    |
|                 | Acres   | Acres     | Pounds         | Cwt.               |
| 1986            | 18,000  | 18,000    | 1,800          | 324,000            |
| 1987            | 5,500   | 5,500     | 1,710          | 94,000             |
| 1988            | 5,000   | 5,000     | 1,800          | 90,000             |
| 1989            | 16,000  | 16,000    | 1,610          | 258,000            |
| 1990            | 17,000  | 17,000    | 1,260          | 214,000            |
| 1991 <u>a/</u>  | ---     | ---       | ---            | ---                |
| 1992            | 4,500   | 4,500     | 1,930          | 87,000             |
| 1993            | 4,500   | 4,500     | 2,000          | 90,000             |
| 1994            | 7,000   | 7,000     | 2,160          | 151,000            |
| 1995            | 7,000   | 6,000     | 1,830          | 110,000            |
| Garbanzo        |         |           |                |                    |
|                 | Acres   | Acres     | Pounds         | Cwt.               |
| 1986            | 6,000   | 6,000     | 800            | 48,000             |
| 1987            | 4,000   | 4,000     | 880            | 35,000             |
| 1988            | 1,000   | 1,000     | 1,100          | 11,000             |
| 1989 <u>a/</u>  | ---     | ---       | ---            | ---                |
| 1990 <u>a/</u>  | ---     | ---       | ---            | ---                |
| 1991 <u>a/</u>  | ---     | ---       | ---            | ---                |
| 1992            | 15,000  | 15,000    | 1,260          | 189,000            |
| 1993            | 17,500  | 16,500    | 1,350          | 222,000            |
| 1994            | 14,000  | 14,000    | 1,870          | 262,000            |
| 1995            | 19,000  | 17,000    | 1,760          | 300,000            |
| Other <u>b/</u> |         |           |                |                    |
|                 | Acres   | Acres     | Pounds         | Cwt.               |
| 1986            | 6,500   | 6,500     | 1,780          | 116,000            |
| 1987            | 9,000   | 9,000     | 1,844          | 166,000            |
| 1988            | 10,000  | 10,000    | 1,750          | 175,000            |
| 1989            | 12,000  | 11,000    | 1,890          | 208,000            |
| 1990            | 12,000  | 10,000    | 1,540          | 154,000            |
| 1991            | 16,000  | 16,000    | 1,620          | 259,000            |
| 1992            | 4,000   | 4,000     | 1,930          | 77,000             |
| 1993            | 7,000   | 7,000     | 1,800          | 126,000            |
| 1994            | 12,000  | 11,500    | 1,400          | 161,000            |
| 1995            | 13,000  | 12,000    | 2,250          | 270,000            |

*a/* Included in "Other".

*b/* Includes varieties not listed separately. Garden seed beans have been excluded. Estimates for the "small white" variety were discontinued in 1989 and will no longer be published separately.

**CALIFORNIA PRICES RECEIVED: MONTHLY AVERAGE, SPECIFIED COMMODITIES, 1986-95**

| Year                                 | Jan.      | Feb.      | Mar.   | Apr.      | May       | June      | July      | Aug.  | Sept.     | Oct.      | Nov.      | Dec.   |
|--------------------------------------|-----------|-----------|--------|-----------|-----------|-----------|-----------|-------|-----------|-----------|-----------|--------|
| <b>Barley</b>                        |           |           |        |           |           |           |           |       |           |           |           |        |
| <i>Dollars Per Cwt.</i>              |           |           |        |           |           |           |           |       |           |           |           |        |
| 1986                                 | 5.50      | 5.00      | 5.21   | 4.65      | 4.40      | 4.29      | 3.60      | 3.67  | 4.48      | 4.19      | 4.54      | 4.00   |
| 1987                                 | 4.04      | 4.52      | 4.38   | 4.35      | 4.77      | 4.42      | 4.42      | 4.08  | 4.00      | 4.10      | 4.50      | 4.35   |
| 1988                                 | 4.71      | 4.38      | 4.54   | 4.96      | 4.69      | 5.15      | 6.13      | 6.02  | 6.02      | 5.94      | 5.17      | 5.77   |
| 1989                                 | 5.83      | 5.58      | 5.67   | 5.29      | 5.94      | 5.60      | 5.88      | 5.27  | 5.13      | 5.00      | 5.19      | 5.56   |
| 1990                                 | 5.27      | 5.69      | 5.40   | 5.63      | 5.67      | 5.75      | 5.67      | 5.15  | 4.81      | 4.69      | 5.04      | 4.85   |
| 1991                                 | 5.06      | 5.90      | 5.44   | 5.27      | 5.29      | 5.31      | 4.94      | 5.15  | 5.04      | 5.25      | 5.00      | 5.69   |
| 1992                                 | 4.92      | 6.17      | 5.92   | 5.67      | 5.21      | 5.65      | 5.10      | 5.38  | 5.44      | 5.50      | 5.50      | 5.48   |
| 1993                                 | 5.60      | 5.52      | 5.75   | 5.46      | 5.02      | 5.33      | 5.04      | 5.04  | 5.17      | 4.67      | 5.17      | 5.04   |
| 1994                                 | 5.62      | <u>a/</u> | 5.29   | 5.31      | 5.38      | 5.40      | 5.21      | 5.42  | <u>a/</u> | <u>a/</u> | <u>a/</u> | 5.65   |
| 1995                                 | <u>a/</u> | 5.67      | 5.60   | <u>a/</u> | 6.10      | <u>a/</u> | <u>a/</u> | 5.77  | 6.17      | <u>a/</u> | 6.96      | 7.10   |
| <b>Beans, Dry Edible <u>b/</u></b>   |           |           |        |           |           |           |           |       |           |           |           |        |
| <i>Dollars Per Cwt.</i>              |           |           |        |           |           |           |           |       |           |           |           |        |
| 1986                                 | 22.00     | 21.20     | 21.00  | 20.90     | 21.20     | 23.00     | 23.50     | 23.20 | 23.00     | 25.00     | 28.00     | 28.00  |
| 1987                                 | 31.00     | 30.00     | 30.00  | 30.00     | 29.00     | 30.00     | 31.00     | 29.00 | 25.00     | 25.00     | 24.00     | 24.00  |
| 1988                                 | 25.00     | 28.00     | 30.00  | 30.00     | 30.00     | 29.00     | 34.00     | 34.00 | 31.00     | 35.00     | 36.00     | 36.00  |
| 1989                                 | 35.00     | 36.00     | 38.00  | 38.00     | 38.00     | 38.00     | 38.00     | 36.00 | 33.00     | 35.00     | 36.00     | 36.00  |
| 1990                                 | 35.00     | 35.00     | 35.00  | 34.00     | 34.00     | 35.00     | 34.00     | 33.50 | 31.00     | 30.50     | 30.00     | 30.00  |
| 1991                                 | 30.40     | 30.00     | 32.20  | 32.60     | 32.40     | 31.20     | 31.60     | 30.80 | 31.40     | 28.30     | 27.70     | 27.70  |
| 1992                                 | 26.70     | 26.50     | 26.00  | 25.00     | 24.00     | 23.50     | 22.50     | 22.50 | 22.00     | 23.50     | 23.80     | 25.20  |
| 1993                                 | 25.00     | 24.80     | 24.70  | 24.20     | 23.60     | 24.20     | 24.80     | 27.40 | 29.40     | 31.20     | 35.50     | 34.80  |
| 1994                                 | 36.90     | 36.70     | 36.30  | 37.00     | 36.00     | 36.00     | 37.80     | 36.90 | 36.20     | 33.00     | 35.10     | 34.10  |
| 1995                                 | 35.40     | 35.10     | 35.40  | 34.60     | 35.00     | 35.70     | 35.20     | 34.40 | 34.40     | 34.00     | 34.60     | 33.80  |
| <b>Cotton Lint, Upland <u>c/</u></b> |           |           |        |           |           |           |           |       |           |           |           |        |
| <i>Cents Per Pound</i>               |           |           |        |           |           |           |           |       |           |           |           |        |
| 1986                                 | 57.00     | 61.00     | 62.40  | 63.90     | 67.10     | 67.50     | 70.70     | 68.00 | 59.50     | 59.30     | 56.50     | 57.40  |
| 1987                                 | 66.90     | 56.30     | 55.10  | 57.90     | 67.50     | 73.30     | 70.10     | 70.10 | 72.80     | 68.90     | 70.20     | 71.30  |
| 1988                                 | 67.20     | 65.50     | 65.80  | 67.20     | 67.50     | 75.90     | 64.20     | 63.90 | 61.60     | 63.70     | 64.80     | 64.50  |
| 1989                                 | 60.70     | 64.40     | 65.70  | 69.90     | 71.00     | 70.10     | 69.40     | 78.90 | 72.70     | 73.10     | 71.90     | 69.70  |
| 1990                                 | 66.80     | 70.00     | 73.80  | 75.70     | 81.20     | 73.50     | 73.90     | 78.70 | 76.70     | 74.90     | 75.30     | 78.50  |
| 1991                                 | 79.30     | 81.90     | 79.70  | 82.00     | 83.70     | 77.80     | 76.10     | 68.20 | 68.50     | 69.40     | 70.60     | 66.60  |
| 1992                                 | 60.10     | 60.90     | 60.10  | 64.40     | <u>a/</u> | 66.10     | <u>a/</u> | 54.50 | 60.30     | 57.80     | 59.20     | 61.90  |
| 1993                                 | 62.50     | 63.30     | 62.90  | 62.40     | 59.50     | 59.70     | <u>a/</u> | 57.60 | 54.50     | 56.10     | 60.20     | 62.30  |
| 1994                                 | 67.10     | 70.40     | 72.20  | 72.40     | 72.40     | 76.40     | 70.80     | 65.40 | 64.80     | 68.80     | 75.40     | 79.30  |
| 1995                                 | 94.50     | 94.80     | 108.00 | 113.20    | 107.90    | 97.90     | 99.40     | 80.60 | 85.90     | 81.00     | 81.70     | 84.50  |
| <b>Cottonseed <u>c/</u></b>          |           |           |        |           |           |           |           |       |           |           |           |        |
| <i>Dollars Per Ton</i>               |           |           |        |           |           |           |           |       |           |           |           |        |
| 1986                                 | <u>a/</u> | <u>a/</u> | ---    | ---       | ---       | ---       | ---       | ---   | ---       | 100.00    | 107.00    | 90.00  |
| 1987                                 | <u>a/</u> | <u>a/</u> | ---    | ---       | ---       | ---       | ---       | ---   | 75.00     | 75.00     | 102.00    | 97.00  |
| 1988                                 | 110.00    | <u>a/</u> | ---    | ---       | ---       | ---       | ---       | ---   | ---       | 147.00    | 148.00    | 147.00 |
| 1989                                 | 147.00    | <u>a/</u> | ---    | ---       | ---       | ---       | ---       | ---   | ---       | 76.00     | 105.00    | 124.00 |
| 1990                                 | <u>a/</u> | <u>a/</u> | ---    | ---       | ---       | ---       | ---       | ---   | ---       | 145.00    | 146.00    | 158.00 |
| 1991                                 | 178.00    | 178.00    | ---    | ---       | ---       | ---       | ---       | ---   | ---       | 104.00    | 103.00    | 104.00 |
| 1992                                 | <u>a/</u> | <u>a/</u> | ---    | ---       | ---       | ---       | ---       | ---   | ---       | 118.00    | 124.00    | 123.00 |
| 1993                                 | <u>a/</u> | <u>a/</u> | ---    | ---       | ---       | ---       | ---       | ---   | ---       | 125.00    | 139.00    | 136.00 |
| 1994                                 | 140.00    | ---       | ---    | ---       | ---       | ---       | ---       | ---   | ---       | ---       | 141.00    | 147.00 |
| 1995                                 | 157.00    | ---       | ---    | ---       | ---       | ---       | ---       | ---   | ---       | ---       | 132.00    | 131.00 |

See Footnotes on Page 63.

**CALIFORNIA PRICES RECEIVED: MONTHLY AVERAGE, SPECIFIED COMMODITIES, 1986-95**

| Year                        | Jan.   | Feb.   | Mar.   | Apr.   | May    | June   | July   | Aug.   | Sept.  | Oct.   | Nov.   | Dec.   |
|-----------------------------|--------|--------|--------|--------|--------|--------|--------|--------|--------|--------|--------|--------|
| <b>Hay, All (Baled)</b>     |        |        |        |        |        |        |        |        |        |        |        |        |
| <i>Dollars Per Ton</i>      |        |        |        |        |        |        |        |        |        |        |        |        |
| 1986                        | 85.00  | 79.00  | 80.00  | 71.00  | 71.00  | 74.00  | 71.00  | 66.00  | 66.00  | 70.00  | 73.00  | 77.00  |
| 1987                        | 79.00  | 81.00  | 82.00  | 84.00  | 84.00  | 76.00  | 72.00  | 72.00  | 74.00  | 76.00  | 72.00  | 73.00  |
| 1988                        | 76.00  | 78.00  | 89.00  | 87.00  | 92.00  | 89.00  | 86.00  | 84.00  | 87.00  | 92.00  | 96.00  | 96.00  |
| 1989                        | 105.00 | 105.00 | 109.00 | 111.00 | 106.00 | 94.00  | 92.00  | 90.00  | 96.00  | 91.00  | 96.00  | 101.00 |
| 1990                        | 107.00 | 107.00 | 108.00 | 121.00 | 111.00 | 103.00 | 97.00  | 94.00  | 96.00  | 100.00 | 101.00 | 95.00  |
| 1991                        | 102.00 | 102.00 | 101.00 | 107.00 | 94.00  | 89.00  | 81.00  | 76.00  | 77.00  | 77.00  | 79.00  | 78.00  |
| 1992                        | 75.00  | 75.00  | 75.00  | 74.00  | 88.00  | 84.00  | 67.00  | 76.00  | 71.00  | 77.00  | 76.00  | 75.00  |
| 1993                        | 81.00  | 85.00  | 89.00  | 96.00  | 104.00 | 97.00  | 89.00  | 92.00  | 101.00 | 104.00 | 108.00 | 110.00 |
| 1994                        | 116.00 | 123.00 | 120.00 | 122.00 | 107.00 | 111.00 | 104.00 | 99.00  | 109.00 | 112.00 | 116.00 | 124.00 |
| 1995                        | 114.00 | 110.00 | 109.00 | 99.00  | 95.00  | 100.00 | 96.00  | 96.00  | 96.00  | 104.00 | 98.00  | 116.00 |
| <b>Hay, Alfalfa (Baled)</b> |        |        |        |        |        |        |        |        |        |        |        |        |
| <i>Dollars Per Ton</i>      |        |        |        |        |        |        |        |        |        |        |        |        |
| 1986                        | 86.00  | 79.00  | 79.00  | 73.00  | 72.00  | 75.00  | 71.00  | 66.00  | 66.00  | 71.00  | 74.00  | 79.00  |
| 1987                        | 80.00  | 82.00  | 83.00  | 86.00  | 87.00  | 78.00  | 73.00  | 73.00  | 75.00  | 78.00  | 73.00  | 76.00  |
| 1988                        | 78.00  | 79.00  | 90.00  | 88.00  | 95.00  | 90.00  | 87.00  | 84.00  | 88.00  | 93.00  | 97.00  | 96.00  |
| 1989                        | 105.00 | 106.00 | 109.00 | 113.00 | 107.00 | 96.00  | 93.00  | 91.00  | 97.00  | 93.00  | 97.00  | 103.00 |
| 1990                        | 110.00 | 109.00 | 109.00 | 123.00 | 115.00 | 105.00 | 100.00 | 97.00  | 99.00  | 103.00 | 103.00 | 96.00  |
| 1991                        | 104.00 | 104.00 | 101.00 | 108.00 | 96.00  | 92.00  | 82.00  | 78.00  | 78.00  | 79.00  | 80.00  | 78.00  |
| 1992                        | 76.00  | 76.00  | 76.00  | 76.00  | 93.00  | 88.00  | 69.00  | 78.00  | 74.00  | 80.00  | 79.00  | 80.00  |
| 1993                        | 86.00  | 91.00  | 92.00  | 97.00  | 107.00 | 100.00 | 91.00  | 94.00  | 103.00 | 107.00 | 112.00 | 116.00 |
| 1994                        | 119.00 | 126.00 | 123.00 | 124.00 | 111.00 | 116.00 | 108.00 | 106.00 | 114.00 | 116.00 | 120.00 | 131.00 |
| 1995                        | 124.00 | 113.00 | 110.00 | 100.00 | 96.00  | 104.00 | 98.00  | 97.00  | 98.00  | 105.00 | 98.00  | 120.00 |
| <b>Oats</b>                 |        |        |        |        |        |        |        |        |        |        |        |        |
| <i>Dollars Per Cwt.</i>     |        |        |        |        |        |        |        |        |        |        |        |        |
| 1986                        | 5.25   | 4.75   | 4.19   | a/     | 4.59   | 3.69   | 4.75   | 4.06   | 5.34   | 6.00   | a/     | 5.59   |
| 1987                        | 5.81   | 5.50   | 5.38   | 5.25   | 5.00   | 5.03   | 4.75   | 5.00   | 5.00   | 5.44   | 5.75   | 5.81   |
| 1988                        | 5.81   | 6.00   | 6.09   | 6.00   | a/     | a/     | a/     | 7.50   | 7.84   | 8.00   | 9.00   | 7.63   |
| 1989                        | a/     | 7.50   | a/     | 6.50   | a/     | 6.00   | a/     | 4.91   | 5.16   | 5.59   | 5.56   | 5.28   |
| 1990                        | 5.09   | 5.59   | 5.06   | 5.03   | 4.88   | 5.03   | 5.00   | 5.00   | 5.06   | 5.09   | 5.13   | 5.06   |
| 1991                        | 5.09   | a/     | 5.03   | 5.06   | 5.84   | 4.56   | 4.50   | 5.00   | 4.50   | 5.03   | 4.50   | a/     |
| 1992                        | 5.22   | 6.31   | a/     | a/     | a/     | 5.25   | 4.63   | 5.16   | a/     | a/     | a/     | 5.22   |
| 1993                        | a/     |
| 1994                        | a/     |
| 1995                        | a/     |
| <b>Potatoes</b>             |        |        |        |        |        |        |        |        |        |        |        |        |
| <i>Dollars Per Cwt.</i>     |        |        |        |        |        |        |        |        |        |        |        |        |
| 1986                        | 6.35   | 6.30   | 5.85   | 6.30   | 7.85   | 8.10   | 9.15   | 9.55   | 8.35   | 7.00   | 6.90   | 6.90   |
| 1987                        | 7.30   | 7.45   | 7.55   | 6.20   | 12.50  | 10.70  | 10.10  | 9.80   | 6.75   | 7.00   | 4.00   | 4.65   |
| 1988                        | 6.00   | 6.35   | 5.45   | 5.50   | 10.10  | 7.15   | 8.30   | 11.30  | 10.10  | 7.55   | 7.75   | 8.70   |
| 1989                        | 10.70  | 11.80  | 9.85   | 10.60  | 10.90  | 11.10  | 13.30  | 18.80  | 10.70  | 10.10  | 8.60   | 8.10   |
| 1990                        | 12.80  | 12.30  | 15.60  | 11.00  | 12.70  | 9.75   | 10.00  | 12.70  | 6.70   | 6.50   | 8.80   | 11.60  |
| 1991                        | 10.40  | 8.80   | 6.75   | 5.35   | 11.30  | 12.10  | 11.20  | 9.40   | 6.95   | 4.10   | 5.80   | 6.75   |
| 1992                        | 6.45   | 7.00   | 6.10   | 7.90   | 7.45   | 8.65   | 11.20  | 15.30  | 11.00  | 8.75   | 10.70  | 11.20  |
| 1993                        | 10.90  | 10.90  | 9.20   | 13.60  | 11.80  | 11.10  | 14.70  | 15.10  | 11.00  | 8.50   | 13.30  | 13.90  |
| 1994                        | 13.70  | 11.60  | 11.60  | 10.70  | 11.70  | 11.00  | 12.10  | 11.50  | 6.75   | 6.55   | 8.45   | 8.40   |
| 1995                        | 8.50   | 9.80   | 9.15   | 8.55   | 12.10  | 12.10  | 14.30  | 16.80  | 19.30  | 13.40  | 13.50  | 12.50  |

See Footnotes on Page 63.

**CALIFORNIA PRICES RECEIVED: MONTHLY AVERAGE, SPECIFIED COMMODITIES, 1986-95**

| Year                    | Jan. | Feb. | Mar. | Apr. | May  | June | July | Aug. | Sept. | Oct. | Nov. | Dec. |
|-------------------------|------|------|------|------|------|------|------|------|-------|------|------|------|
| <b>Wheat, All</b>       |      |      |      |      |      |      |      |      |       |      |      |      |
| <i>Dollars Per Cwt.</i> |      |      |      |      |      |      |      |      |       |      |      |      |
| 1986                    | 6.12 | 5.88 | 5.93 | 5.30 | 4.93 | 5.02 | 4.60 | 5.02 | 5.20  | 4.25 | 4.53 | 4.62 |
| 1987                    | 5.20 | 5.02 | 4.65 | 4.38 | 5.02 | 4.67 | 4.53 | 4.32 | 5.15  | 5.50 | 5.02 | 4.77 |
| 1988                    | 5.25 | 4.88 | 5.72 | a/   | 5.67 | 6.23 | 6.70 | 6.25 | 6.03  | 6.52 | 6.33 | 7.33 |
| 1989                    | 7.55 | 7.18 | 7.28 | 7.43 | 7.47 | 6.40 | 6.40 | 6.25 | 6.23  | 6.67 | 6.35 | 6.15 |
| 1990                    | 6.18 | 5.58 | 6.23 | 6.42 | 6.08 | 5.80 | 5.83 | 5.22 | 4.83  | 4.82 | 4.55 | 4.58 |
| 1991                    | 5.55 | 4.52 | 5.08 | 4.92 | 4.73 | 5.33 | 5.17 | 5.17 | 5.18  | 5.52 | 5.40 | 5.25 |
| 1992                    | 6.27 | 6.63 | 6.35 | 6.37 | 5.73 | 5.87 | 5.82 | 5.43 | 5.63  | 5.83 | 5.75 | 5.57 |
| 1993                    | 5.88 | 6.18 | 5.53 | 5.33 | 5.30 | 5.30 | 5.00 | 5.25 | 5.02  | 4.97 | 5.67 | 5.93 |
| 1994                    | 6.25 | 5.77 | 5.73 | 5.77 | 6.22 | 6.30 | 5.63 | 5.73 | 6.27  | 6.77 | 6.77 | 6.63 |
| 1995                    | 7.21 | 6.40 | 7.00 | 6.23 | 7.12 | 7.53 | 6.73 | a/   | 7.07  | 7.50 | 8.83 | 7.72 |

*a/ Not published -- insufficient sales or disclosure problem.*

*b/ The marketing season for dry beans is September 1 to August 31.*

*c/ The marketing season for cotton and cottonseed is August 1 to July 31.*

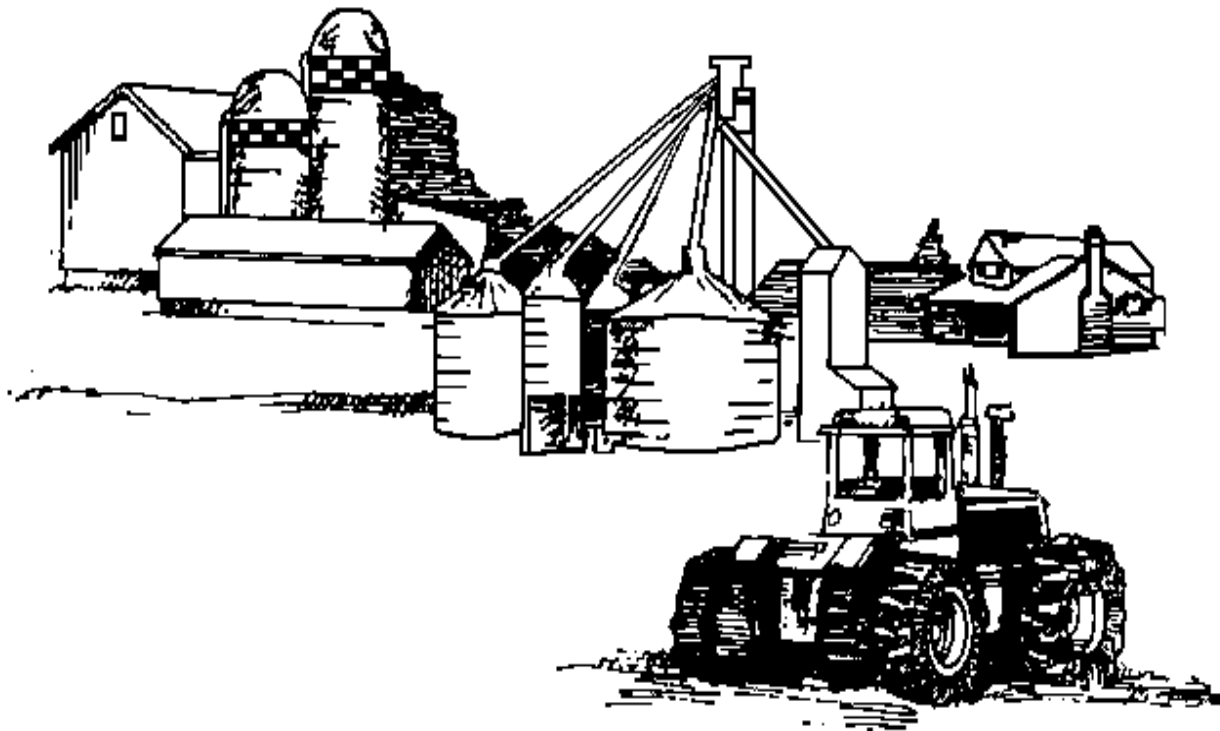

# CALIFORNIA BARLEY: Acreage, Yield And Production By Counties, 1994-95

| County          | 1994    |           |            |            | 1995    |           |            |            |
|-----------------|---------|-----------|------------|------------|---------|-----------|------------|------------|
|                 | Planted | Harvested | Yield/Acre | Production | Planted | Harvested | Yield/Acre | Production |
|                 | Acres   |           | Bushels    |            | Acres   |           | Bushels    |            |
| Del Norte       | ---     | ---       | ---        | ---        | ---     | ---       | ---        | ---        |
| Humboldt        | ---     | ---       | ---        | ---        | ---     | ---       | ---        | ---        |
| Mendocino       | ---     | ---       | ---        | ---        | ---     | ---       | ---        | ---        |
|                 | ---     | ---       | ---        | ---        | ---     | ---       | ---        | ---        |
| Shasta          | 1,100   | 700       | 64.3       | 45,000     | 800     | 500       | 80.0       | 40,000     |
| Siskiyou        | 17,900  | 16,300    | 92.3       | 1,505,000  | 14,700  | 13,000    | 106.2      | 1,380,000  |
| Trinity         | ---     | ---       | ---        | ---        | ---     | ---       | ---        | ---        |
|                 | 19,000  | 17,000    | 91.2       | 1,550,000  | 15,500  | 13,500    | 105.2      | 1,420,000  |
| Lassen          | 1,400   | 1,300     | 76.9       | 100,000    | 1,200   | 1,000     | 78.0       | 78,000     |
| Modoc           | 18,600  | 15,700    | 100.0      | 1,570,000  | 16,300  | 13,500    | 115.7      | 1,562,000  |
| Plumas          | ---     | ---       | ---        | ---        | ---     | ---       | ---        | ---        |
|                 | 20,000  | 17,000    | 98.2       | 1,670,000  | 17,500  | 14,500    | 113.1      | 1,640,000  |
| Alameda         | 500     | 200       | 55.0       | 11,000     | 400     | 200       | 60.0       | 12,000     |
| Contra Costa    | 600     | 500       | 50.0       | 25,000     | 600     | 500       | 52.0       | 26,000     |
| Lake            | ---     | ---       | ---        | ---        | ---     | ---       | ---        | ---        |
| Marin           | ---     | ---       | ---        | ---        | ---     | ---       | ---        | ---        |
| Monterey        | 23,200  | 15,200    | 38.9       | 592,000    | 19,500  | 13,700    | 42.3       | 580,000    |
| Napa            | ---     | ---       | ---        | ---        | ---     | ---       | ---        | ---        |
| San Benito      | 7,900   | 5,400     | 54.1       | 292,000    | 7,500   | 5,300     | 54.2       | 287,000    |
| San Francisco   | ---     | ---       | ---        | ---        | ---     | ---       | ---        | ---        |
| San Luis Obispo | 36,500  | 32,600    | 49.0       | 1,597,000  | 28,300  | 22,800    | 50.4       | 1,150,000  |
| San Mateo       | 400     | 300       | 46.7       | 14,000     | 300     | 200       | 50.0       | 10,000     |
| Santa Clara     | 800     | 300       | 46.7       | 14,000     | 700     | 300       | 50.0       | 15,000     |
| Santa Cruz      | ---     | ---       | ---        | ---        | ---     | ---       | ---        | ---        |
| Sonoma          | ---     | ---       | ---        | ---        | ---     | ---       | ---        | ---        |
| Combined 1/     | 100     | ---       | ---        | ---        | 200     | ---       | ---        | ---        |
|                 | 70,000  | 54,500    | 46.7       | 2,545,000  | 57,500  | 43,000    | 48.4       | 2,080,000  |
| Butte           | 3,700   | 2,300     | 45.2       | 104,000    | 3,100   | 1,600     | 48.1       | 77,000     |
| Colusa          | 1,600   | 1,500     | 46.7       | 70,000     | 1,400   | 1,100     | 49.1       | 54,000     |
| Glenn           | 2,500   | 2,400     | 46.3       | 111,000    | 2,200   | 1,900     | 48.9       | 93,000     |
| Sacramento      | 1,500   | 1,300     | 70.8       | 92,000     | 1,300   | 1,000     | 72.0       | 72,000     |
| Solano          | 19,000  | 17,800    | 53.4       | 951,000    | 16,500  | 14,400    | 54.5       | 785,000    |
| Sutter          | 1,700   | 900       | 62.2       | 56,000     | 1,400   | 700       | 62.9       | 44,000     |
| Tehama          | 1,900   | 1,900     | 39.5       | 75,000     | 1,600   | 1,200     | 43.3       | 52,000     |
| Yolo            | 4,100   | 1,900     | 61.1       | 116,000    | 3,500   | 1,600     | 59.4       | 95,000     |
| Yuba            | ---     | ---       | ---        | ---        | ---     | ---       | ---        | ---        |
|                 | 36,000  | 30,000    | 52.5       | 1,575,000  | 31,000  | 23,500    | 54.1       | 1,272,000  |
| Fresno          | 17,300  | 15,000    | 85.0       | 1,275,000  | 16,000  | 13,800    | 86.4       | 1,193,000  |
| Kern            | 30,000  | 24,000    | 66.7       | 1,600,000  | 28,800  | 27,400    | 70.2       | 1,923,000  |
| Kings           | 33,800  | 27,000    | 70.0       | 1,890,000  | 34,800  | 31,800    | 73.9       | 2,349,000  |
| Madera          | 3,900   | 3,400     | 88.2       | 300,000    | 3,500   | 2,700     | 94.8       | 256,000    |
| Merced          | 3,500   | 2,500     | 94.0       | 235,000    | 3,100   | 2,000     | 95.5       | 191,000    |
| San Joaquin     | 3,300   | 2,500     | 76.0       | 190,000    | 3,100   | 1,500     | 88.7       | 133,000    |
| Stanislaus      | 2,500   | 1,700     | 61.8       | 105,000    | 2,000   | 1,000     | 69.0       | 69,000     |
| Tulare          | 25,200  | 11,900    | 73.9       | 880,000    | 23,200  | 12,800    | 77.5       | 992,000    |
|                 | 119,500 | 88,000    | 73.6       | 6,475,000  | 114,500 | 93,000    | 76.4       | 7,106,000  |
| Alpine          | ---     | ---       | ---        | ---        | ---     | ---       | ---        | ---        |
| Amador          | 400     | 400       | 72.5       | 29,000     | 300     | 300       | 83.3       | 25,000     |
| Calaveras       | ---     | ---       | ---        | ---        | ---     | ---       | ---        | ---        |
| El Dorado       | ---     | ---       | ---        | ---        | ---     | ---       | ---        | ---        |
| Inyo            | ---     | ---       | ---        | ---        | ---     | ---       | ---        | ---        |
| Mariposa        | ---     | ---       | ---        | ---        | ---     | ---       | ---        | ---        |
| Mono            | ---     | ---       | ---        | ---        | ---     | ---       | ---        | ---        |
| Nevada          | ---     | ---       | ---        | ---        | ---     | ---       | ---        | ---        |
| Placer          | ---     | ---       | ---        | ---        | ---     | ---       | ---        | ---        |
| Sierra          | ---     | ---       | ---        | ---        | ---     | ---       | ---        | ---        |
| Tuolumne        | ---     | ---       | ---        | ---        | ---     | ---       | ---        | ---        |
| Combined 1/     | 100     | 100       | 60.0       | 6,000      | 200     | 200       | 60.0       | 12,000     |
|                 | 500     | 500       | 70.0       | 35,000     | 500     | 500       | 74.0       | 37,000     |
| Imperial        | ---     | ---       | ---        | ---        | ---     | ---       | ---        | ---        |
| Los Angeles     | 4,000   | 2,000     | 58.0       | 116,000    | 3,800   | 2,900     | 51.4       | 149,000    |
| Orange          | ---     | ---       | ---        | ---        | ---     | ---       | ---        | ---        |
| Riverside       | 11,300  | 5,800     | 31.0       | 180,000    | 10,600  | 4,400     | 33.9       | 149,000    |
| San Bernardino  | 3,100   | 2,000     | 22.5       | 45,000     | 3,000   | 2,000     | 27.0       | 54,000     |
| San Diego       | 2,000   | 1,500     | 30.0       | 45,000     | 1,900   | 1,400     | 31.4       | 44,000     |
| Santa Barbara   | 3,200   | 800       | 50.0       | 40,000     | 3,000   | 600       | 48.3       | 29,000     |
| Ventura         | 1,000   | 600       | 25.0       | 15,000     | 900     | 500       | 28.0       | 14,000     |
| Combined 1/     | 400     | 300       | 30.0       | 9,000      | 300     | 200       | 30.0       | 6,000      |
|                 | 25,000  | 13,000    | 34.6       | 450,000    | 23,500  | 12,000    | 37.1       | 445,000    |
| STATE           | 290,000 | 220,000   | 65.0       | 14,300,000 | 260,000 | 200,000   | 70.0       | 14,000,000 |

1/ These figures include estimates for one or more counties which normally have less than 200 acres planted.

# CALIFORNIA DRY EDIBLE BEANS: Acreage, Yield And Production By Counties, 1994-95

| County                       | 1994    |           |            |            | 1995    |           |            |            |
|------------------------------|---------|-----------|------------|------------|---------|-----------|------------|------------|
|                              | Planted | Harvested | Yield/Acre | Production | Planted | Harvested | Yield/Acre | Production |
|                              | Acres   |           | Pounds     | Cwt.       | Acres   |           | Pounds     | Cwt.       |
| Del Norte                    | ---     | ---       | ---        | ---        | ---     | ---       | ---        | ---        |
| Humboldt                     | ---     | ---       | ---        | ---        | ---     | ---       | ---        | ---        |
| Mendocino                    | 200     | 200       | 2,000      | 4,000      | 200     | 200       | 2,000      | 4,000      |
|                              | 200     | 200       | 2,000      | 4,000      | 200     | 200       | 2,000      | 4,000      |
| Shasta                       | ---     | ---       | ---        | ---        | ---     | ---       | ---        | ---        |
| Siskiyou                     | ---     | ---       | ---        | ---        | ---     | ---       | ---        | ---        |
| Trinity                      | ---     | ---       | ---        | ---        | ---     | ---       | ---        | ---        |
|                              | ---     | ---       | ---        | ---        | ---     | ---       | ---        | ---        |
| Lassen                       | ---     | ---       | ---        | ---        | ---     | ---       | ---        | ---        |
| Modoc                        | ---     | ---       | ---        | ---        | ---     | ---       | ---        | ---        |
| Plumas                       | ---     | ---       | ---        | ---        | ---     | ---       | ---        | ---        |
|                              | ---     | ---       | ---        | ---        | ---     | ---       | ---        | ---        |
| Alameda                      | ---     | ---       | ---        | ---        | ---     | ---       | ---        | ---        |
| Contra Costa                 | ---     | ---       | ---        | ---        | ---     | ---       | ---        | ---        |
| Lake                         | ---     | ---       | ---        | ---        | ---     | ---       | ---        | ---        |
| Marin                        | ---     | ---       | ---        | ---        | ---     | ---       | ---        | ---        |
| Monterey                     | 3,000   | 2,900     | 2,310      | 67,000     | 3,100   | 3,000     | 2,300      | 69,000     |
| Napa                         | ---     | ---       | ---        | ---        | ---     | ---       | ---        | ---        |
| San Benito                   | ---     | ---       | ---        | ---        | ---     | ---       | ---        | ---        |
| San Francisco                | ---     | ---       | ---        | ---        | ---     | ---       | ---        | ---        |
| San Luis Obispo              | 1,600   | 1,600     | 1,500      | 24,000     | 1,800   | 1,700     | 1,471      | 25,000     |
| San Mateo                    | 200     | 200       | 2,000      | 4,000      | 200     | 200       | 2,000      | 4,000      |
| Santa Clara                  | 500     | 500       | 2,400      | 12,000     | 500     | 500       | 2,400      | 12,000     |
| Santa Cruz                   | ---     | ---       | ---        | ---        | ---     | ---       | ---        | ---        |
| Sonoma                       | ---     | ---       | ---        | ---        | ---     | ---       | ---        | ---        |
|                              | 5,300   | 5,200     | 2,058      | 107,000    | 5,600   | 5,400     | 2,037      | 110,000    |
| Butte                        | 2,000   | 2,000     | 2,200      | 44,000     | 2,300   | 2,100     | 2,143      | 45,000     |
| Colusa                       | 10,400  | 9,400     | 2,160      | 203,000    | 10,600  | 10,000    | 2,000      | 200,000    |
| Glenn                        | 3,500   | 3,300     | 2,000      | 66,000     | 3,700   | 3,400     | 2,088      | 71,000     |
| Sacramento                   | 1,600   | 1,600     | 2,063      | 33,000     | 1,600   | 1,600     | 2,188      | 35,000     |
| Solano                       | 5,000   | 4,800     | 1,979      | 95,000     | 5,700   | 5,400     | 2,037      | 110,000    |
| Sutter                       | 9,600   | 9,300     | 1,968      | 183,000    | 9,800   | 9,100     | 1,934      | 176,000    |
| Tehama                       | 1,400   | 1,400     | 1,500      | 21,000     | 1,400   | 1,400     | 1,500      | 21,000     |
| Yolo                         | 3,000   | 3,000     | 1,667      | 50,000     | 3,500   | 3,300     | 1,758      | 58,000     |
| Yuba                         | 200     | 200       | 2,000      | 4,000      | 200     | 200       | 2,000      | 4,000      |
|                              | 36,700  | 35,000    | 1,997      | 699,000    | 38,800  | 36,500    | 1,973      | 720,000    |
| Fresno                       | 15,900  | 15,600    | 2,135      | 333,000    | 19,000  | 17,400    | 2,011      | 350,000    |
| Kern                         | 7,000   | 6,700     | 2,269      | 152,000    | 7,200   | 6,800     | 2,500      | 170,000    |
| Kings                        | 3,000   | 3,000     | 1,900      | 57,000     | 3,300   | 3,100     | 2,290      | 71,000     |
| Madera                       | 1,600   | 1,600     | 2,188      | 35,000     | 1,700   | 1,700     | 2,000      | 34,000     |
| Merced                       | 4,500   | 4,300     | 2,279      | 98,000     | 4,900   | 4,500     | 2,533      | 114,000    |
| San Joaquin                  | 18,100  | 17,500    | 2,131      | 373,000    | 18,600  | 17,800    | 2,135      | 380,000    |
| Stanislaus                   | 24,000  | 23,200    | 2,349      | 545,000    | 25,000  | 24,000    | 2,479      | 595,000    |
| Tulare                       | 9,000   | 8,600     | 2,395      | 206,000    | 9,700   | 9,100     | 2,637      | 240,000    |
|                              | 83,100  | 80,500    | 2,235      | 1,799,000  | 89,400  | 84,400    | 2,315      | 1,954,000  |
| Alpine                       | ---     | ---       | ---        | ---        | ---     | ---       | ---        | ---        |
| Amador                       | ---     | ---       | ---        | ---        | ---     | ---       | ---        | ---        |
| Calaveras                    | ---     | ---       | ---        | ---        | ---     | ---       | ---        | ---        |
| El Dorado                    | ---     | ---       | ---        | ---        | ---     | ---       | ---        | ---        |
| Inyo                         | ---     | ---       | ---        | ---        | ---     | ---       | ---        | ---        |
| Mariposa                     | ---     | ---       | ---        | ---        | ---     | ---       | ---        | ---        |
| Mono                         | ---     | ---       | ---        | ---        | ---     | ---       | ---        | ---        |
| Nevada                       | ---     | ---       | ---        | ---        | ---     | ---       | ---        | ---        |
| Placer                       | ---     | ---       | ---        | ---        | ---     | ---       | ---        | ---        |
| Sierra                       | ---     | ---       | ---        | ---        | ---     | ---       | ---        | ---        |
| Tuolumne                     | ---     | ---       | ---        | ---        | ---     | ---       | ---        | ---        |
|                              | ---     | ---       | ---        | ---        | ---     | ---       | ---        | ---        |
| Imperial                     | ---     | ---       | ---        | ---        | ---     | ---       | ---        | ---        |
| Los Angeles                  | ---     | ---       | ---        | ---        | ---     | ---       | ---        | ---        |
| Orange                       | 1,000   | 900       | 2,222      | 20,000     | 1,100   | 1,000     | 2,200      | 22,000     |
| Riverside                    | 1,000   | 1,000     | 1,600      | 16,000     | 1,000   | 1,000     | 1,600      | 16,000     |
| San Bernardino               | ---     | ---       | ---        | ---        | ---     | ---       | ---        | ---        |
| San Diego                    | 200     | 200       | 1,500      | 3,000      | 200     | 200       | 1,500      | 3,000      |
| Santa Barbara                | 8,300   | 7,800     | 1,526      | 119,000    | 8,400   | 8,000     | 1,563      | 125,000    |
| Ventura                      | 200     | 200       | 2,000      | 4,000      | 300     | 300       | 2,000      | 6,000      |
|                              | 10,700  | 10,100    | 1,604      | 162,000    | 11,000  | 10,500    | 1,638      | 172,000    |
| Other Counties <sup>1/</sup> | ---     | ---       | ---        | ---        | ---     | ---       | ---        | ---        |
| STATE                        | 136,000 | 131,000   | 2,115      | 2,771,000  | 145,000 | 137,000   | 2,160      | 2,960,000  |

<sup>1/</sup> Includes those counties which normally have less than 200 acres planted



# CALIFORNIA CORN: Acreage, Yield And Production By Counties, 1994-95

| County          | 1994    |           |            |            | 1995    |           |            |            |
|-----------------|---------|-----------|------------|------------|---------|-----------|------------|------------|
|                 | Planted | Harvested | Yield/Acre | Production | Planted | Harvested | Yield/Acre | Production |
|                 | Acres   |           | Bushels    |            | Acres   |           | Bushels    |            |
| Del Norte       | ---     | ---       | ---        | ---        | ---     | ---       | ---        | ---        |
| Humboldt        | ---     | ---       | ---        | ---        | ---     | ---       | ---        | ---        |
| Mendocino       | ---     | ---       | ---        | ---        | ---     | ---       | ---        | ---        |
|                 | ---     | ---       | ---        | ---        | ---     | ---       | ---        | ---        |
| Shasta          | 300     | ---       | ---        | ---        | 200     | ---       | ---        | ---        |
| Siskiyou        | 700     | ---       | ---        | ---        | 300     | ---       | ---        | ---        |
| Trinity         | ---     | ---       | ---        | ---        | ---     | ---       | ---        | ---        |
|                 | 1,000   | ---       | ---        | ---        | 500     | ---       | ---        | ---        |
| Lassen          | ---     | ---       | ---        | ---        | ---     | ---       | ---        | ---        |
| Modoc           | ---     | ---       | ---        | ---        | ---     | ---       | ---        | ---        |
| Plumas          | ---     | ---       | ---        | ---        | ---     | ---       | ---        | ---        |
|                 | ---     | ---       | ---        | ---        | ---     | ---       | ---        | ---        |
| Alameda         | 500     | 500       | 160.0      | 80,000     | 200     | 200       | 145.0      | 29,000     |
| Contra Costa    | 6,800   | 6,500     | 145.4      | 945,000    | 5,500   | 5,200     | 150.6      | 783,000    |
| Lake            | ---     | ---       | ---        | ---        | ---     | ---       | ---        | ---        |
| Marin           | ---     | ---       | ---        | ---        | ---     | ---       | ---        | ---        |
| Monterey        | 200     | 200       | 175.0      | 35,000     | 200     | 200       | 160.0      | 32,000     |
| Napa            | ---     | ---       | ---        | ---        | ---     | ---       | ---        | ---        |
| San Benito      | 300     | ---       | ---        | ---        | 400     | ---       | ---        | ---        |
| San Francisco   | ---     | ---       | ---        | ---        | ---     | ---       | ---        | ---        |
| San Luis Obispo | ---     | ---       | ---        | ---        | ---     | ---       | ---        | ---        |
| San Mateo       | ---     | ---       | ---        | ---        | ---     | ---       | ---        | ---        |
| Santa Clara     | 200     | 200       | 150.0      | 30,000     | 200     | 200       | 140.0      | 28,000     |
| Santa Cruz      | ---     | ---       | ---        | ---        | ---     | ---       | ---        | ---        |
| Sonoma          | 500     | 200       | 150.0      | 30,000     | 500     | 200       | 140.0      | 28,000     |
|                 | 8,500   | 7,600     | 147.4      | 1,120,000  | 7,000   | 6,000     | 150.0      | 900,000    |
| Butte           | 1,000   | 800       | 156.3      | 125,000    | 1,100   | 600       | 166.7      | 100,000    |
| Colusa          | 4,100   | 3,600     | 150.0      | 540,000    | 3,800   | 2,800     | 160.7      | 450,000    |
| Glenn           | 12,000  | 9,900     | 177.8      | 1,760,000  | 11,900  | 8,500     | 155.3      | 1,320,000  |
| Sacramento      | 28,900  | 24,000    | 144.0      | 3,455,000  | 32,000  | 28,000    | 154.8      | 4,335,000  |
| Solano          | 24,900  | 16,900    | 180.5      | 3,050,000  | 24,500  | 16,300    | 160.1      | 2,610,000  |
| Sutter          | 3,600   | 2,900     | 184.5      | 535,000    | 3,000   | 2,400     | 160.4      | 385,000    |
| Tehama          | 1,500   | 1,400     | 175.0      | 245,000    | 1,400   | 700       | 150.0      | 105,000    |
| Yolo            | 21,400  | 18,700    | 177.5      | 3,320,000  | 20,600  | 17,300    | 158.4      | 2,740,000  |
| Yuba            | 1,600   | 1,000     | 170.0      | 170,000    | 1,700   | 700       | 150.0      | 105,000    |
|                 | 99,000  | 79,200    | 166.7      | 13,200,000 | 100,000 | 77,300    | 157.2      | 12,150,000 |
| Fresno          | 21,600  | 3,400     | 155.9      | 530,000    | 23,500  | 1,400     | 142.9      | 200,000    |
| Kern            | 5,400   | 2,000     | 177.5      | 355,000    | 6,000   | 500       | 150.0      | 75,000     |
| Kings           | 22,000  | 3,300     | 162.1      | 535,000    | 25,400  | 1,500     | 150.0      | 225,000    |
| Madera          | 12,200  | 5,900     | 165.3      | 975,000    | 14,700  | 5,500     | 140.0      | 770,000    |
| Merced          | 55,800  | 3,800     | 146.1      | 555,000    | 56,600  | 4,000     | 140.0      | 560,000    |
| San Joaquin     | 80,600  | 60,000    | 179.8      | 10,790,000 | 76,300  | 43,000    | 170.9      | 7,350,000  |
| Stanislaus      | 36,000  | 900       | 138.9      | 125,000    | 36,500  | 600       | 158.3      | 95,000     |
| Tulare          | 72,900  | 12,200    | 175.0      | 2,135,000  | 82,500  | 8,000     | 171.3      | 1,370,000  |
|                 | 306,500 | 91,500    | 174.9      | 16,000,000 | 321,500 | 64,500    | 165.0      | 10,645,000 |
| Alpine          | ---     | ---       | ---        | ---        | ---     | ---       | ---        | ---        |
| Amador          | 500     | 500       | 200.0      | 100,000    | 500     | 500       | 150.0      | 75,000     |
| Calaveras       | ---     | ---       | ---        | ---        | ---     | ---       | ---        | ---        |
| El Dorado       | ---     | ---       | ---        | ---        | ---     | ---       | ---        | ---        |
| Inyo            | ---     | ---       | ---        | ---        | ---     | ---       | ---        | ---        |
| Mariposa        | ---     | ---       | ---        | ---        | ---     | ---       | ---        | ---        |
| Mono            | ---     | ---       | ---        | ---        | ---     | ---       | ---        | ---        |
| Nevada          | ---     | ---       | ---        | ---        | ---     | ---       | ---        | ---        |
| Placer          | 500     | 500       | 200.0      | 100,000    | 1,000   | 1,000     | 150.0      | 150,000    |
| Sierra          | ---     | ---       | ---        | ---        | ---     | ---       | ---        | ---        |
| Tuolumne        | ---     | ---       | ---        | ---        | ---     | ---       | ---        | ---        |
|                 | 1,000   | 1,000     | 200.0      | 200,000    | 1,500   | 1,500     | 150.0      | 225,000    |
| Imperial        | 500     | 300       | 100.0      | 30,000     | 500     | 300       | 100.0      | 30,000     |
| Los Angeles     | ---     | ---       | ---        | ---        | ---     | ---       | ---        | ---        |
| Orange          | ---     | ---       | ---        | ---        | ---     | ---       | ---        | ---        |
| Riverside       | 1,200   | 200       | 100.0      | 20,000     | 1,500   | 200       | 100.0      | 20,000     |
| San Bernardino  | 1,300   | ---       | ---        | ---        | 1,500   | ---       | ---        | ---        |
| San Diego       | ---     | ---       | ---        | ---        | ---     | ---       | ---        | ---        |
| Santa Barbara   | 500     | ---       | ---        | ---        | 500     | ---       | ---        | ---        |
| Ventura         | ---     | ---       | ---        | ---        | ---     | ---       | ---        | ---        |
|                 | 3,500   | 500       | 100.0      | 50,000     | 4,000   | 500       | 100.0      | 50,000     |
| Combined 1/     | 500     | 200       | 150.0      | 30,000     | 500     | 200       | 150.0      | 30,000     |
| STATE           | 420,000 | 180,000   | 170.0      | 30,600,000 | 435,000 | 150,000   | 160.0      | 24,000,000 |

1/ Includes those counties which normally have less than 200 acres planted.

**CALIFORNIA COTTON, UPLAND: Acreage, Yield And Production By Counties, 1994-95**

| County         | 1994      |           |            |            | 1995      |           |            |            |
|----------------|-----------|-----------|------------|------------|-----------|-----------|------------|------------|
|                | Planted   | Harvested | Yield/Acre | Production | Planted   | Harvested | Yield/Acre | Production |
|                | Acres     |           | Pounds     | Bales      | Acres     |           | Pounds     | Bales      |
| DEL NORTE      | ---       | ---       | ---        | ---        | ---       | ---       | ---        | ---        |
| HUMBOLT        | ---       | ---       | ---        | ---        | ---       | ---       | ---        | ---        |
| MENDOCINO      | ---       | ---       | ---        | ---        | ---       | ---       | ---        | ---        |
|                | ---       | ---       | ---        | ---        | ---       | ---       | ---        | ---        |
| SHASTA         | ---       | ---       | ---        | ---        | ---       | ---       | ---        | ---        |
| SISKIYOU       | ---       | ---       | ---        | ---        | ---       | ---       | ---        | ---        |
| TRINITY        | ---       | ---       | ---        | ---        | ---       | ---       | ---        | ---        |
|                | ---       | ---       | ---        | ---        | ---       | ---       | ---        | ---        |
| LASSEN         | ---       | ---       | ---        | ---        | ---       | ---       | ---        | ---        |
| MODOC          | ---       | ---       | ---        | ---        | ---       | ---       | ---        | ---        |
| PLUMAS         | ---       | ---       | ---        | ---        | ---       | ---       | ---        | ---        |
|                | ---       | ---       | ---        | ---        | ---       | ---       | ---        | ---        |
| ALAMEDA        | ---       | ---       | ---        | ---        | ---       | ---       | ---        | ---        |
| CONTRA COSTA   | ---       | ---       | ---        | ---        | ---       | ---       | ---        | ---        |
| LAKE           | ---       | ---       | ---        | ---        | ---       | ---       | ---        | ---        |
| MARIN          | ---       | ---       | ---        | ---        | ---       | ---       | ---        | ---        |
| MONTEREY       | ---       | ---       | ---        | ---        | ---       | ---       | ---        | ---        |
| NAPA           | ---       | ---       | ---        | ---        | ---       | ---       | ---        | ---        |
| SAN BENITO     | ---       | ---       | ---        | ---        | ---       | ---       | ---        | ---        |
| SAN FRANCISCO  | ---       | ---       | ---        | ---        | ---       | ---       | ---        | ---        |
| SAN LUIS OBISP | ---       | ---       | ---        | ---        | ---       | ---       | ---        | ---        |
| SAN MATEO      | ---       | ---       | ---        | ---        | ---       | ---       | ---        | ---        |
| SANTA CLARA    | ---       | ---       | ---        | ---        | ---       | ---       | ---        | ---        |
| SANTA CRUZ     | ---       | ---       | ---        | ---        | ---       | ---       | ---        | ---        |
| SONOMA         | ---       | ---       | ---        | ---        | ---       | ---       | ---        | ---        |
|                | ---       | ---       | ---        | ---        | ---       | ---       | ---        | ---        |
| BUTTE          | ---       | ---       | ---        | ---        | ---       | ---       | ---        | ---        |
| COLUSA         | ---       | ---       | ---        | ---        | 4,800     | 4,100     | 468        | 4,000      |
| GLEN           | ---       | ---       | ---        | ---        | 800       | 700       | 480        | 700        |
| SACRAMENTO     | ---       | ---       | ---        | ---        | ---       | ---       | ---        | ---        |
| SOLANO         | ---       | ---       | ---        | ---        | ---       | ---       | ---        | ---        |
| SUTTER         | ---       | ---       | ---        | ---        | ---       | ---       | ---        | ---        |
| TEHAMA         | ---       | ---       | ---        | ---        | ---       | ---       | ---        | ---        |
| YOLO           | ---       | ---       | ---        | ---        | 500       | 500       | 768        | 800        |
| YUBA           | ---       | ---       | ---        | ---        | ---       | ---       | ---        | ---        |
| COMBINED 1/    | 1,100     | 1,100     | 1,309      | 3,000      | 1,200     | 1,000     | 624        | 1,300      |
|                | 1,100     | 1,100     | 1,309      | 3,000      | 7,300     | 6,300     | 518        | 6,800      |
| FRESNO         | 347,000   | 345,000   | 1,295      | 931,000    | 364,000   | 363,000   | 1,091      | 825,000    |
| KERN           | 266,000   | 265,000   | 1,186      | 655,000    | 270,000   | 268,000   | 856        | 478,000    |
| KINGS          | 226,000   | 225,000   | 1,082      | 507,000    | 245,000   | 245,000   | 876        | 447,000    |
| MADERA         | 39,000    | 39,000    | 1,255      | 102,000    | 45,000    | 45,000    | 875        | 82,000     |
| MERCED         | 76,000    | 76,000    | 1,301      | 206,000    | 83,000    | 83,000    | 1,105      | 191,000    |
| SAN JOAQUIN    | ---       | ---       | ---        | ---        | ---       | ---       | ---        | ---        |
| STANISLAUS     | ---       | ---       | ---        | ---        | ---       | ---       | ---        | ---        |
| TULARE         | 126,000   | 125,000   | 1,010      | 263,000    | 134,000   | 133,000   | 830        | 230,000    |
|                | 1,080,000 | 1,075,000 | 1,190      | 2,664,000  | 1,141,000 | 1,137,000 | 951        | 2,253,000  |
| ALPINE         | ---       | ---       | ---        | ---        | ---       | ---       | ---        | ---        |
| AMADOR         | ---       | ---       | ---        | ---        | ---       | ---       | ---        | ---        |
| CALAVERAS      | ---       | ---       | ---        | ---        | ---       | ---       | ---        | ---        |
| EL DORADO      | ---       | ---       | ---        | ---        | ---       | ---       | ---        | ---        |
| INYO           | ---       | ---       | ---        | ---        | ---       | ---       | ---        | ---        |
| MARIPOSA       | ---       | ---       | ---        | ---        | ---       | ---       | ---        | ---        |
| MONO           | ---       | ---       | ---        | ---        | ---       | ---       | ---        | ---        |
| NEVADA         | ---       | ---       | ---        | ---        | ---       | ---       | ---        | ---        |
| PLACER         | ---       | ---       | ---        | ---        | ---       | ---       | ---        | ---        |
| SIERRA         | ---       | ---       | ---        | ---        | ---       | ---       | ---        | ---        |
| TUOLUMNE       | ---       | ---       | ---        | ---        | ---       | ---       | ---        | ---        |
|                | ---       | ---       | ---        | ---        | ---       | ---       | ---        | ---        |
| IMPERIAL       | 8,600     | 8,600     | 1,284      | 23,000     | 8,800     | 8,800     | 1,184      | 21,700     |
| LOS ANGELES    | ---       | ---       | ---        | ---        | ---       | ---       | ---        | ---        |
| ORANGE         | ---       | ---       | ---        | ---        | ---       | ---       | ---        | ---        |
| RIVERSIDE      | 9,800     | 9,800     | 1,273      | 26,000     | 12,200    | 12,200    | 1,133      | 28,800     |
| SAN            | ---       | ---       | ---        | ---        | ---       | ---       | ---        | ---        |
| SAN DIEGO      | ---       | ---       | ---        | ---        | ---       | ---       | ---        | ---        |
| SANTA BARBARA  | ---       | ---       | ---        | ---        | ---       | ---       | ---        | ---        |
| VENTURA        | ---       | ---       | ---        | ---        | ---       | ---       | ---        | ---        |
|                | 18,400    | 18,400    | 1,278      | 49,000     | 21,000    | 21,000    | 1,154      | 50,500     |
| COMBINED 2/    | 500       | 500       | 960        | 1,000      | 700       | 700       | 1,166      | 1,700      |
| STATE - TOTAL  | 1,100,000 | 1,095,000 | 1,191      | 2,717,000  | 1,170,000 | 1,165,000 | 953        | 2,312,000  |

1/ Some or all individual county totals not published due to possible disclosure of individual operations.

2/ Includes those counties which normally have less than 500 acres planted.

# CALIFORNIA COTTON, AMERICAN PIMA: Acreage, Yield And Production By Counties, 1994-95

| County         | 1994    |           |            |            | 1995    |           |            |            |
|----------------|---------|-----------|------------|------------|---------|-----------|------------|------------|
|                | Planted | Harvested | Yield/Acre | Production | Planted | Harvested | Yield/Acre | Production |
|                | Acres   |           | Pounds     | Bales      | Acres   |           | Pounds     | Bales      |
| DEL NORTE      | ---     | ---       | ---        | ---        | ---     | ---       | ---        | ---        |
| HUMBOLT        | ---     | ---       | ---        | ---        | ---     | ---       | ---        | ---        |
| MENDOCINO      | ---     | ---       | ---        | ---        | ---     | ---       | ---        | ---        |
|                | ---     | ---       | ---        | ---        | ---     | ---       | ---        | ---        |
| SHASTA         | ---     | ---       | ---        | ---        | ---     | ---       | ---        | ---        |
| SISKIYOU       | ---     | ---       | ---        | ---        | ---     | ---       | ---        | ---        |
| TRINITY        | ---     | ---       | ---        | ---        | ---     | ---       | ---        | ---        |
|                | ---     | ---       | ---        | ---        | ---     | ---       | ---        | ---        |
| LASSEN         | ---     | ---       | ---        | ---        | ---     | ---       | ---        | ---        |
| MODOC          | ---     | ---       | ---        | ---        | ---     | ---       | ---        | ---        |
| PLUMAS         | ---     | ---       | ---        | ---        | ---     | ---       | ---        | ---        |
|                | ---     | ---       | ---        | ---        | ---     | ---       | ---        | ---        |
| ALAMEDA        | ---     | ---       | ---        | ---        | ---     | ---       | ---        | ---        |
| CONTRA COSTA   | ---     | ---       | ---        | ---        | ---     | ---       | ---        | ---        |
| LAKE           | ---     | ---       | ---        | ---        | ---     | ---       | ---        | ---        |
| MARIN          | ---     | ---       | ---        | ---        | ---     | ---       | ---        | ---        |
| MONTEREY       | ---     | ---       | ---        | ---        | ---     | ---       | ---        | ---        |
| NAPA           | ---     | ---       | ---        | ---        | ---     | ---       | ---        | ---        |
| SAN BENITO     | ---     | ---       | ---        | ---        | ---     | ---       | ---        | ---        |
| SAN FRANCISCO  | ---     | ---       | ---        | ---        | ---     | ---       | ---        | ---        |
| SAN LUIS OBISP | ---     | ---       | ---        | ---        | ---     | ---       | ---        | ---        |
| SAN MATEO      | ---     | ---       | ---        | ---        | ---     | ---       | ---        | ---        |
| SANTA CLARA    | ---     | ---       | ---        | ---        | ---     | ---       | ---        | ---        |
| SANTA CRUZ     | ---     | ---       | ---        | ---        | ---     | ---       | ---        | ---        |
| SONOMA         | ---     | ---       | ---        | ---        | ---     | ---       | ---        | ---        |
|                | ---     | ---       | ---        | ---        | ---     | ---       | ---        | ---        |
| BUTTE          | ---     | ---       | ---        | ---        | ---     | ---       | ---        | ---        |
| COLUSA         | ---     | ---       | ---        | ---        | ---     | ---       | ---        | ---        |
| GLEN           | ---     | ---       | ---        | ---        | ---     | ---       | ---        | ---        |
| SACRAMENTO     | ---     | ---       | ---        | ---        | ---     | ---       | ---        | ---        |
| SOLANO         | ---     | ---       | ---        | ---        | ---     | ---       | ---        | ---        |
| SUTTER         | ---     | ---       | ---        | ---        | ---     | ---       | ---        | ---        |
| TEHAMA         | ---     | ---       | ---        | ---        | ---     | ---       | ---        | ---        |
| YOLO           | ---     | ---       | ---        | ---        | ---     | ---       | ---        | ---        |
| YUBA           | ---     | ---       | ---        | ---        | ---     | ---       | ---        | ---        |
|                | ---     | ---       | ---        | ---        | ---     | ---       | ---        | ---        |
| FRESNO         | 30,700  | 30,500    | 1,201      | 76,300     | 48,500  | 48,500    | 1,044      | 105,500    |
| KERN           | 25,000  | 25,000    | 1,089      | 56,700     | 34,800  | 34,800    | 848        | 61,500     |
| KINGS          | 24,000  | 24,000    | 978        | 48,900     | 30,300  | 30,300    | 870        | 54,900     |
| MADERA         | ---     | ---       | ---        | ---        | ---     | ---       | ---        | ---        |
| MERCED         | 500     | 500       | 1,152      | 1,200      | 400     | 400       | 1,080      | 900        |
| SAN JOAQUIN    | ---     | ---       | ---        | ---        | ---     | ---       | ---        | ---        |
| STANISLAUS     | ---     | ---       | ---        | ---        | ---     | ---       | ---        | ---        |
| TULARE         | 500     | 500       | 1,056      | 1,100      | 700     | 700       | 823        | 1,200      |
|                | 80,700  | 80,500    | 1,098      | 184,200    | 114,700 | 114,700   | 937        | 224,000    |
| ALPINE         | ---     | ---       | ---        | ---        | ---     | ---       | ---        | ---        |
| AMADOR         | ---     | ---       | ---        | ---        | ---     | ---       | ---        | ---        |
| CALAVERAS      | ---     | ---       | ---        | ---        | ---     | ---       | ---        | ---        |
| EL DORADO      | ---     | ---       | ---        | ---        | ---     | ---       | ---        | ---        |
| INYO           | ---     | ---       | ---        | ---        | ---     | ---       | ---        | ---        |
| MARIPOSA       | ---     | ---       | ---        | ---        | ---     | ---       | ---        | ---        |
| MONO           | ---     | ---       | ---        | ---        | ---     | ---       | ---        | ---        |
| NEVADA         | ---     | ---       | ---        | ---        | ---     | ---       | ---        | ---        |
| PLACER         | ---     | ---       | ---        | ---        | ---     | ---       | ---        | ---        |
| SIERRA         | ---     | ---       | ---        | ---        | ---     | ---       | ---        | ---        |
| TUOLUMNE       | ---     | ---       | ---        | ---        | ---     | ---       | ---        | ---        |
|                | ---     | ---       | ---        | ---        | ---     | ---       | ---        | ---        |
| IMPERIAL       | ---     | ---       | ---        | ---        | ---     | ---       | ---        | ---        |
| LOS ANGELES    | ---     | ---       | ---        | ---        | ---     | ---       | ---        | ---        |
| ORANGE         | ---     | ---       | ---        | ---        | ---     | ---       | ---        | ---        |
| RIVERSIDE      | ---     | ---       | ---        | ---        | ---     | ---       | ---        | ---        |
| SAN            | ---     | ---       | ---        | ---        | ---     | ---       | ---        | ---        |
| SAN DIEGO      | ---     | ---       | ---        | ---        | ---     | ---       | ---        | ---        |
| SANTA BARBARA  | ---     | ---       | ---        | ---        | ---     | ---       | ---        | ---        |
| VENTURA        | ---     | ---       | ---        | ---        | ---     | ---       | ---        | ---        |
|                | ---     | ---       | ---        | ---        | ---     | ---       | ---        | ---        |
| COMBINED 1/    | 300     | 300       | 960        | 600        | 300     | 300       | 800        | 500        |
| STATE - TOTAL  | 81,000  | 80,800    | 1,098      | 184,800    | 115,000 | 115,000   | 937        | 224,500    |

1/ Includes those counties which normally have less than 200 acres planted.

# CALIFORNIA OATS: Acreage, Yield And Production By Counties, 1994-95

| County          | 1994    |           |            |            | 1995    |           |            |            |
|-----------------|---------|-----------|------------|------------|---------|-----------|------------|------------|
|                 | Planted | Harvested | Yield/Acre | Production | Planted | Harvested | Yield/Acre | Production |
|                 | Acres   |           | Bushels    |            | Acres   |           | Bushels    |            |
| Del Norte       | ---     | ---       | ---        | ---        | ---     | ---       | ---        | ---        |
| Humboldt        | 300     | 200       | 50.0       | 10,000     | ---     | ---       | ---        | ---        |
| Mendocino       | 2,600   | 200       | 50.0       | 10,000     | 2,500   | 200       | 80.0       | 16,000     |
| Combined 1/     | ---     | ---       | ---        | ---        | 400     | 100       | 80.0       | 8,000      |
|                 | 2,900   | 400       | 50.0       | 20,000     | 2,900   | 300       | 80.0       | 24,000     |
| Shasta          | 1,200   | 300       | 100.0      | 30,000     | 1,100   | 300       | 116.7      | 35,000     |
| Siskiyou        | 6,000   | 3,800     | 113.9      | 433,000    | 5,800   | 3,400     | 111.5      | 379,000    |
| Trinity         | ---     | ---       | ---        | ---        | ---     | ---       | ---        | ---        |
|                 | 7,200   | 4,100     | 112.9      | 463,000    | 6,900   | 3,700     | 111.9      | 414,000    |
| Lassen          | 6,400   | 400       | 75.0       | 30,000     | 6,600   | 300       | 100.0      | 30,000     |
| Modoc           | 8,300   | 1,000     | 100.0      | 100,000    | 9,100   | 800       | 128.8      | 103,000    |
| Plumas          | 900     | ---       | ---        | ---        | 1,000   | ---       | ---        | ---        |
|                 | 15,600  | 1,400     | 92.9       | 130,000    | 16,700  | 1,100     | 120.9      | 133,000    |
| Alameda         | 3,000   | 200       | 75.0       | 15,000     | 3,000   | 200       | 70.0       | 14,000     |
| Contra Costa    | 2,100   | 400       | 80.0       | 32,000     | 2,300   | 300       | 76.7       | 23,000     |
| Lake            | 3,300   | 200       | 70.0       | 14,000     | 3,200   | 400       | 67.5       | 27,000     |
| Marin           | 6,000   | 600       | 70.0       | 42,000     | 6,200   | 900       | 66.7       | 60,000     |
| Monterey        | 3,200   | 600       | 80.0       | 48,000     | 3,400   | 400       | 82.5       | 33,000     |
| Napa            | 1,200   | ---       | ---        | ---        | 1,400   | ---       | ---        | ---        |
| San Benito      | 3,100   | 200       | 65.0       | 13,000     | 3,300   | 400       | 62.5       | 25,000     |
| San Francisco   | ---     | ---       | ---        | ---        | ---     | ---       | ---        | ---        |
| San Luis Obispo | 15,100  | 1,500     | 54.7       | 82,000     | 17,400  | 1,400     | 58.6       | 82,000     |
| San Mateo       | 1,500   | 800       | 71.3       | 57,000     | 1,600   | 900       | 67.8       | 61,000     |
| Santa Clara     | 2,800   | 600       | 80.0       | 48,000     | 3,000   | 600       | 83.3       | 50,000     |
| Santa Cruz      | 900     | ---       | ---        | ---        | 1,000   | ---       | ---        | ---        |
| Sonoma          | 24,300  | 1,500     | 46.0       | 69,000     | 25,200  | 1,600     | 48.8       | 78,000     |
|                 | 66,500  | 6,600     | 63.6       | 420,000    | 71,000  | 7,100     | 63.8       | 453,000    |
| Butte           | 5,700   | 300       | 63.3       | 19,000     | 6,100   | 300       | 80.0       | 24,000     |
| Colusa          | 700     | 200       | 75.0       | 15,000     | 700     | 400       | 82.5       | 33,000     |
| Glenn           | 4,700   | 400       | 67.5       | 27,000     | 5,300   | 300       | 80.0       | 24,000     |
| Sacramento      | 5,200   | 400       | 65.0       | 26,000     | 5,900   | 500       | 90.0       | 45,000     |
| Solano          | 3,600   | 1,500     | 80.0       | 120,000    | 4,300   | 1,200     | 83.3       | 100,000    |
| Sutter          | 2,900   | 500       | 92.0       | 46,000     | 3,300   | 400       | 90.0       | 36,000     |
| Tehama          | 3,700   | 300       | 80.0       | 24,000     | 4,200   | 200       | 75.0       | 15,000     |
| Yolo            | 11,400  | 200       | 75.0       | 15,000     | 12,500  | 200       | 95.0       | 19,000     |
| Yuba            | 1,100   | 400       | 75.0       | 30,000     | 1,100   | 300       | 80.0       | 24,000     |
|                 | 39,000  | 4,200     | 76.7       | 322,000    | 43,400  | 3,800     | 84.2       | 320,000    |
| Fresno          | 10,900  | 1,700     | 94.1       | 160,000    | 12,600  | 1,900     | 100.5      | 191,000    |
| Kern            | 4,200   | 500       | 106.0      | 53,000     | 4,600   | 600       | 118.3      | 71,000     |
| Kings           | 3,600   | 200       | 90.0       | 18,000     | 4,000   | 200       | 95.0       | 19,000     |
| Madera          | 8,000   | 1,000     | 100.0      | 100,000    | 8,300   | 1,300     | 105.4      | 137,000    |
| Merced          | 42,500  | 3,700     | 84.3       | 312,000    | 48,100  | 3,600     | 96.1       | 346,000    |
| San Joaquin     | 23,100  | 900       | 91.1       | 82,000     | 24,200  | 1,000     | 102.0      | 102,000    |
| Stanislaus      | 29,000  | 800       | 93.8       | 75,000     | 35,900  | 900       | 102.2      | 92,000     |
| Tulare          | 31,700  | 2,000     | 75.0       | 150,000    | 33,900  | 1,900     | 71.6       | 136,000    |
|                 | 153,000 | 10,800    | 88.0       | 950,000    | 171,600 | 11,400    | 96.0       | 1,094,000  |
| Alpine          | ---     | ---       | ---        | ---        | ---     | ---       | ---        | ---        |
| Amador          | 600     | ---       | ---        | ---        | 800     | ---       | ---        | ---        |
| Calaveras       | 800     | 200       | 55.0       | 11,000     | 1,000   | 200       | 65.0       | 13,000     |
| El Dorado       | 200     | ---       | ---        | ---        | 300     | ---       | ---        | ---        |
| Inyo            | 200     | ---       | ---        | ---        | 300     | ---       | ---        | ---        |
| Mariposa        | 200     | ---       | ---        | ---        | 200     | ---       | ---        | ---        |
| Mono            | 500     | ---       | ---        | ---        | 600     | ---       | ---        | ---        |
| Nevada          | ---     | ---       | ---        | ---        | ---     | ---       | ---        | ---        |
| Placer          | 3,100   | 500       | 48.0       | 24,000     | 3,700   | 400       | 65.0       | 26,000     |
| Sierra          | 600     | ---       | ---        | ---        | 700     | ---       | ---        | ---        |
| Tuolumne        | 200     | ---       | ---        | ---        | 300     | ---       | ---        | ---        |
|                 | 6,400   | 700       | 50.0       | 35,000     | 7,900   | 600       | 65.0       | 39,000     |
| Imperial        | 400     | ---       | ---        | ---        | 500     | ---       | ---        | ---        |
| Los Angeles     | 800     | 200       | 30.0       | 6,000      | 1,200   | 200       | 35.0       | 7,000      |
| Orange          | 200     | ---       | ---        | ---        | 300     | ---       | ---        | ---        |
| Riverside       | 7,400   | 900       | 31.1       | 28,000     | 11,500  | 1,100     | 35.5       | 39,000     |
| San Bernardino  | 2,000   | ---       | ---        | ---        | 2,900   | ---       | ---        | ---        |
| San Diego       | 3,800   | 400       | 37.5       | 15,000     | 6,400   | 400       | 40.0       | 16,000     |
| Santa Barbara   | 3,900   | 300       | 36.7       | 11,000     | 5,500   | 300       | 36.7       | 11,000     |
| Ventura         | 900     | ---       | ---        | ---        | 1,300   | ---       | ---        | ---        |
|                 | 19,400  | 1,800     | 33.3       | 60,000     | 29,600  | 2,000     | 36.5       | 73,000     |
| STATE           | 310,000 | 30,000    | 80.0       | 2,400,000  | 350,000 | 30,000    | 85.0       | 2,550,000  |

1/ These figures include estimates for one or more counties which normally have less than 200 acres planted.

# **CALIFORNIA RICE: Acreage, Yield And Production By Counties, 1994-95**

| County          | 1994    |           |            |            | 1995    |           |            |            |
|-----------------|---------|-----------|------------|------------|---------|-----------|------------|------------|
|                 | Planted | Harvested | Yield/Acre | Production | Planted | Harvested | Yield/Acre | Production |
|                 | Acres   |           | Pounds     | Cwt.       | Acres   |           | Pounds     | Cwt.       |
| Del Norte       | ---     | ---       | ---        | ---        | ---     | ---       | ---        | ---        |
| Humboldt        | ---     | ---       | ---        | ---        | ---     | ---       | ---        | ---        |
| Mendocino       | ---     | ---       | ---        | ---        | ---     | ---       | ---        | ---        |
|                 | ---     | ---       | ---        | ---        | ---     | ---       | ---        | ---        |
| Shasta          | ---     | ---       | ---        | ---        | ---     | ---       | ---        | ---        |
| Siskiyou        | ---     | ---       | ---        | ---        | ---     | ---       | ---        | ---        |
| Trinity         | ---     | ---       | ---        | ---        | ---     | ---       | ---        | ---        |
|                 | ---     | ---       | ---        | ---        | ---     | ---       | ---        | ---        |
| Lassen          | ---     | ---       | ---        | ---        | ---     | ---       | ---        | ---        |
| Modoc           | ---     | ---       | ---        | ---        | ---     | ---       | ---        | ---        |
| Plumas          | ---     | ---       | ---        | ---        | ---     | ---       | ---        | ---        |
|                 | ---     | ---       | ---        | ---        | ---     | ---       | ---        | ---        |
| Alameda         | ---     | ---       | ---        | ---        | ---     | ---       | ---        | ---        |
| Contra Costa    | ---     | ---       | ---        | ---        | ---     | ---       | ---        | ---        |
| Lake            | ---     | ---       | ---        | ---        | ---     | ---       | ---        | ---        |
| Marin           | ---     | ---       | ---        | ---        | ---     | ---       | ---        | ---        |
| Monterey        | ---     | ---       | ---        | ---        | ---     | ---       | ---        | ---        |
| Napa            | ---     | ---       | ---        | ---        | ---     | ---       | ---        | ---        |
| San Benito      | ---     | ---       | ---        | ---        | ---     | ---       | ---        | ---        |
| San Francisco   | ---     | ---       | ---        | ---        | ---     | ---       | ---        | ---        |
| San Luis Obispo | ---     | ---       | ---        | ---        | ---     | ---       | ---        | ---        |
| San Mateo       | ---     | ---       | ---        | ---        | ---     | ---       | ---        | ---        |
| Santa Clara     | ---     | ---       | ---        | ---        | ---     | ---       | ---        | ---        |
| Santa Cruz      | ---     | ---       | ---        | ---        | ---     | ---       | ---        | ---        |
| Sonoma          | ---     | ---       | ---        | ---        | ---     | ---       | ---        | ---        |
|                 | ---     | ---       | ---        | ---        | ---     | ---       | ---        | ---        |
| Butte           | 88,000  | 87,700    | 8,438      | 7,400,000  | 83,000  | 82,700    | 7,573      | 6,263,000  |
| Colusa          | 123,000 | 122,700   | 8,341      | 10,234,000 | 122,000 | 121,400   | 7,790      | 9,457,000  |
| Glenn           | 81,000  | 80,700    | 8,400      | 6,779,000  | 79,000  | 78,700    | 7,535      | 5,930,000  |
| Sacramento      | 11,500  | 11,500    | 8,435      | 970,000    | 10,300  | 10,300    | 6,505      | 670,000    |
| Solano          | ---     | ---       | ---        | ---        | ---     | ---       | ---        | ---        |
| Sutter          | 90,000  | 89,700    | 8,740      | 7,840,000  | 82,000  | 81,700    | 7,408      | 6,052,000  |
| Tehama          | 1,800   | 1,800     | 8,333      | 150,000    | 1,700   | 1,700     | 7,412      | 126,000    |
| Yolo            | 26,700  | 26,600    | 8,876      | 2,361,000  | 27,000  | 26,900    | 7,509      | 2,020,000  |
| Yuba            | 34,000  | 33,800    | 8,896      | 3,007,000  | 32,000  | 31,900    | 8,091      | 2,581,000  |
|                 | 456,000 | 454,500   | 8,524      | 38,741,000 | 437,000 | 435,300   | 7,604      | 33,099,000 |
| Fresno          | 3,000   | 3,000     | 7,933      | 238,000    | 4,000   | 4,000     | 7,375      | 295,000    |
| Kern            | ---     | ---       | ---        | ---        | ---     | ---       | ---        | ---        |
| Kings           | ---     | ---       | ---        | ---        | ---     | ---       | ---        | ---        |
| Madera          | ---     | ---       | ---        | ---        | ---     | ---       | ---        | ---        |
| Merced          | 5,000   | 4,900     | 8,102      | 397,000    | 5,000   | 4,900     | 8,265      | 405,000    |
| San Joaquin     | 6,000   | 5,900     | 7,966      | 470,000    | 5,000   | 4,900     | 7,653      | 375,000    |
| Stanislaus      | 3,000   | 3,000     | 7,500      | 225,000    | 3,000   | 3,000     | 7,400      | 222,000    |
| Tulare          | ---     | ---       | ---        | ---        | ---     | ---       | ---        | ---        |
|                 | 17,000  | 16,800    | 7,917      | 1,330,000  | 17,000  | 16,800    | 7,720      | 1,297,000  |
| Alpine          | ---     | ---       | ---        | ---        | ---     | ---       | ---        | ---        |
| Amador          | ---     | ---       | ---        | ---        | ---     | ---       | ---        | ---        |
| Calaveras       | ---     | ---       | ---        | ---        | ---     | ---       | ---        | ---        |
| El Dorado       | ---     | ---       | ---        | ---        | ---     | ---       | ---        | ---        |
| Inyo            | ---     | ---       | ---        | ---        | ---     | ---       | ---        | ---        |
| Mariposa        | ---     | ---       | ---        | ---        | ---     | ---       | ---        | ---        |
| Mono            | ---     | ---       | ---        | ---        | ---     | ---       | ---        | ---        |
| Nevada          | ---     | ---       | ---        | ---        | ---     | ---       | ---        | ---        |
| Placer          | 14,000  | 13,700    | 8,416      | 1,153,000  | 13,000  | 12,900    | 7,411      | 956,000    |
| Sierra          | ---     | ---       | ---        | ---        | ---     | ---       | ---        | ---        |
| Tuolumne        | ---     | ---       | ---        | ---        | ---     | ---       | ---        | ---        |
|                 | 14,000  | 13,700    | 8,416      | 1,153,000  | 13,000  | 12,900    | 7,411      | 956,000    |
| Imperial        | ---     | ---       | ---        | ---        | ---     | ---       | ---        | ---        |
| Los Angeles     | ---     | ---       | ---        | ---        | ---     | ---       | ---        | ---        |
| Orange          | ---     | ---       | ---        | ---        | ---     | ---       | ---        | ---        |
| Riverside       | ---     | ---       | ---        | ---        | ---     | ---       | ---        | ---        |
| San Bernardino  | ---     | ---       | ---        | ---        | ---     | ---       | ---        | ---        |
| San Diego       | ---     | ---       | ---        | ---        | ---     | ---       | ---        | ---        |
| Santa Barbara   | ---     | ---       | ---        | ---        | ---     | ---       | ---        | ---        |
| Ventura         | ---     | ---       | ---        | ---        | ---     | ---       | ---        | ---        |
|                 | ---     | ---       | ---        | ---        | ---     | ---       | ---        | ---        |
| STATE           | 487,000 | 485,000   | 8,500      | 41,224,000 | 467,000 | 465,000   | 7,600      | 35,352,000 |

# CALIFORNIA SUGAR BEETS: Acreage, Yield And Production By Counties, 1994-95

| County            | 1994    |           |            |            |         | 1995    |           |            |            |         |
|-------------------|---------|-----------|------------|------------|---------|---------|-----------|------------|------------|---------|
|                   | Planted | Harvested | Yield/Acre | Production | Percent | Planted | Harvested | Yield/Acre | Production | Percent |
|                   | Acres   |           | Tons       |            | Percent | Acres   |           | Tons       |            | Percent |
| Del Norte         | ---     | ---       | ---        | ---        | ---     | ---     | ---       | ---        | ---        | ---     |
| Humboldt          | ---     | ---       | ---        | ---        | ---     | ---     | ---       | ---        | ---        | ---     |
| Mendocino         | ---     | ---       | ---        | ---        | ---     | ---     | ---       | ---        | ---        | ---     |
|                   | ---     | ---       | ---        | ---        | ---     | ---     | ---       | ---        | ---        | ---     |
| Shasta            | 500     | 500       | 16.0       | 8,000      | 17.92   | 500     | 500       | 18.0       | 9,000      | 17.80   |
| Siskiyou          | 1,700   | 1,600     | 19.4       | 31,000     | 18.91   | 1,800   | 1,800     | 18.9       | 34,000     | 18.81   |
| Trinity           | ---     | ---       | ---        | ---        | ---     | ---     | ---       | ---        | ---        | ---     |
|                   | 2,200   | 2,100     | 18.6       | 39,000     | 18.71   | 2,300   | 2,300     | 18.7       | 43,000     | 18.60   |
| Lassen            | 1,000   | 900       | 14.4       | 13,000     | 18.60   | 900     | 900       | 13.3       | 12,000     | 18.58   |
| Modoc             | 3,600   | 3,600     | 24.4       | 88,000     | 18.75   | 3,500   | 3,500     | 19.7       | 69,000     | 18.67   |
| Plumas            | ---     | ---       | ---        | ---        | ---     | ---     | ---       | ---        | ---        | ---     |
|                   | 4,600   | 4,500     | 22.4       | 101,000    | 18.73   | 4,400   | 4,400     | 18.4       | 81,000     | 18.66   |
| Alameda           | ---     | ---       | ---        | ---        | ---     | ---     | ---       | ---        | ---        | ---     |
| Contra Costa      | ---     | ---       | ---        | ---        | ---     | ---     | ---       | ---        | ---        | ---     |
| Lake              | ---     | ---       | ---        | ---        | ---     | ---     | ---       | ---        | ---        | ---     |
| Marin             | ---     | ---       | ---        | ---        | ---     | ---     | ---       | ---        | ---        | ---     |
| Monterey          | ---     | ---       | ---        | ---        | ---     | ---     | ---       | ---        | ---        | ---     |
| Napa              | ---     | ---       | ---        | ---        | ---     | ---     | ---       | ---        | ---        | ---     |
| San Benito        | ---     | ---       | ---        | ---        | ---     | ---     | ---       | ---        | ---        | ---     |
| San Francisco     | ---     | ---       | ---        | ---        | ---     | ---     | ---       | ---        | ---        | ---     |
| San Luis Obispo   | ---     | ---       | ---        | ---        | ---     | ---     | ---       | ---        | ---        | ---     |
| San Mateo         | ---     | ---       | ---        | ---        | ---     | ---     | ---       | ---        | ---        | ---     |
| Santa Clara       | ---     | ---       | ---        | ---        | ---     | ---     | ---       | ---        | ---        | ---     |
| Santa Cruz        | ---     | ---       | ---        | ---        | ---     | ---     | ---       | ---        | ---        | ---     |
| Sonoma            | ---     | ---       | ---        | ---        | ---     | ---     | ---       | ---        | ---        | ---     |
|                   | ---     | ---       | ---        | ---        | ---     | ---     | ---       | ---        | ---        | ---     |
| Butte             | 1,800   | 1,800     | 32.2       | 58,000     | 13.01   | 1,200   | 1,200     | 26.7       | 32,000     | 13.18   |
| Colusa            | 5,000   | 4,700     | 27.2       | 128,000    | 14.54   | 3,300   | 3,200     | 27.5       | 88,000     | 13.51   |
| Glenn             | 10,000  | 9,700     | 34.5       | 335,000    | 13.34   | 5,000   | 4,800     | 29.2       | 140,000    | 13.49   |
| Sacramento        | 5,100   | 5,100     | 23.7       | 121,000    | 15.21   | 4,100   | 4,000     | 27.0       | 108,000    | 14.61   |
| Solano            | 9,500   | 9,200     | 24.0       | 221,000    | 15.44   | 8,300   | 8,000     | 26.9       | 215,000    | 15.00   |
| Sutter            | 1,900   | 1,900     | 24.2       | 46,000     | 14.75   | 1,500   | 1,500     | 26.7       | 40,000     | 14.10   |
| Tehama            | ---     | ---       | ---        | ---        | ---     | ---     | ---       | ---        | ---        | ---     |
| Yolo              | 7,100   | 7,100     | 26.6       | 189,000    | 14.74   | 5,900   | 5,700     | 26.0       | 148,000    | 14.92   |
| Yuba              | ---     | ---       | ---        | ---        | ---     | ---     | ---       | ---        | ---        | ---     |
|                   | 40,400  | 39,500    | 27.8       | 1,098,000  | 14.39   | 29,300  | 28,400    | 27.1       | 771,000    | 14.37   |
| Fresno            | 20,600  | 20,400    | 28.1       | 574,000    | 14.96   | 15,600  | 15,300    | 26.2       | 401,000    | 14.08   |
| Kern              | 8,800   | 8,800     | 29.0       | 255,000    | 14.43   | 7,600   | 7,500     | 31.5       | 236,000    | 14.80   |
| Kings             | 4,100   | 4,000     | 25.0       | 100,000    | 13.72   | 3,000   | 2,900     | 30.3       | 88,000     | 13.62   |
| Madera            | 700     | 600       | 30.0       | 18,000     | 14.30   | 500     | 500       | 28.0       | 14,000     | 14.26   |
| Merced            | 8,400   | 8,400     | 23.9       | 201,000    | 15.49   | 6,600   | 6,500     | 26.0       | 169,000    | 15.03   |
| San Joaquin       | 16,000  | 16,000    | 25.1       | 402,000    | 15.36   | 12,100  | 11,800    | 25.2       | 297,000    | 15.32   |
| Stanislaus        | ---     | ---       | ---        | ---        | ---     | ---     | ---       | ---        | ---        | ---     |
| Tulare            | 3,200   | 3,200     | 26.9       | 86,000     | 13.29   | 2,600   | 2,600     | 30.8       | 80,000     | 13.60   |
|                   | 61,800  | 61,400    | 26.6       | 1,636,000  | 14.87   | 48,000  | 47,100    | 27.3       | 1,285,000  | 14.56   |
| Alpine            | ---     | ---       | ---        | ---        | ---     | ---     | ---       | ---        | ---        | ---     |
| Amador            | ---     | ---       | ---        | ---        | ---     | ---     | ---       | ---        | ---        | ---     |
| Calaveras         | ---     | ---       | ---        | ---        | ---     | ---     | ---       | ---        | ---        | ---     |
| El Dorado         | ---     | ---       | ---        | ---        | ---     | ---     | ---       | ---        | ---        | ---     |
| Inyo              | ---     | ---       | ---        | ---        | ---     | ---     | ---       | ---        | ---        | ---     |
| Mariposa          | ---     | ---       | ---        | ---        | ---     | ---     | ---       | ---        | ---        | ---     |
| Mono              | ---     | ---       | ---        | ---        | ---     | ---     | ---       | ---        | ---        | ---     |
| Nevada            | ---     | ---       | ---        | ---        | ---     | ---     | ---       | ---        | ---        | ---     |
| Placer            | ---     | ---       | ---        | ---        | ---     | ---     | ---       | ---        | ---        | ---     |
| Sierra            | ---     | ---       | ---        | ---        | ---     | ---     | ---       | ---        | ---        | ---     |
| Tuolumne          | ---     | ---       | ---        | ---        | ---     | ---     | ---       | ---        | ---        | ---     |
|                   | ---     | ---       | ---        | ---        | ---     | ---     | ---       | ---        | ---        | ---     |
| Imperial          | 31,800  | 31,600    | 32.1       | 1,013,000  | 16.36   | 31,000  | 30,900    | 32.0       | 989,000    | 16.88   |
| Los Angeles       | ---     | ---       | ---        | ---        | ---     | ---     | ---       | ---        | ---        | ---     |
| Orange            | ---     | ---       | ---        | ---        | ---     | ---     | ---       | ---        | ---        | ---     |
| Riverside         | ---     | ---       | ---        | ---        | ---     | ---     | ---       | ---        | ---        | ---     |
| San Bernardino    | ---     | ---       | ---        | ---        | ---     | ---     | ---       | ---        | ---        | ---     |
| San Diego         | ---     | ---       | ---        | ---        | ---     | ---     | ---       | ---        | ---        | ---     |
| Santa Barbara     | ---     | ---       | ---        | ---        | ---     | ---     | ---       | ---        | ---        | ---     |
| Ventura           | ---     | ---       | ---        | ---        | ---     | ---     | ---       | ---        | ---        | ---     |
|                   | 31,800  | 31,600    | 32.1       | 1,013,000  | 16.36   | 31,000  | 30,900    | 32.0       | 989,000    | 16.88   |
| Other Counties 1/ | 2,200   | 1,900     | 32.1       | 61,000     | 14.73   | 2,000   | 1,900     | 26.8       | 51,000     | 14.40   |
| STATE             | 143,000 | 141,000   | 28.0       | 3,948,000  | 15.25   | 117,000 | 115,000   | 28.0       | 3,220,000  | 15.38   |

1/ Includes those counties which normally have less than 500 acres planted.

**CALIFORNIA WHEAT, ALL: Acreage, Yield And Production By Counties, 1994-95**

| County          | 1994    |           |            |            | 1995    |           |            |            |
|-----------------|---------|-----------|------------|------------|---------|-----------|------------|------------|
|                 | Planted | Harvested | Yield/Acre | Production | Planted | Harvested | Yield/Acre | Production |
|                 | Acres   |           | Bushels    |            | Acres   |           | Bushels    |            |
| Del Norte       | ---     | ---       | ---        | ---        | ---     | ---       | ---        | ---        |
| Humboldt        | ---     | ---       | ---        | ---        | ---     | ---       | ---        | ---        |
| Mendocino       | ---     | ---       | ---        | ---        | ---     | ---       | ---        | ---        |
|                 | ---     | ---       | ---        | ---        | ---     | ---       | ---        | ---        |
| Shasta          | 2,000   | 2,000     | 67.0       | 134,000    | 2,000   | 1,000     | 72.0       | 72,000     |
| Siskiyou        | 8,000   | 6,000     | 73.7       | 442,000    | 7,500   | 6,500     | 71.7       | 466,000    |
| Trinity         | ---     | ---       | ---        | ---        | ---     | ---       | ---        | ---        |
|                 | 10,000  | 8,000     | 72.0       | 576,000    | 9,500   | 7,500     | 71.7       | 538,000    |
| Lassen          | 2,000   | 2,000     | 50.5       | 101,000    | 2,000   | 1,500     | 41.3       | 62,000     |
| Modoc           | 4,000   | 3,000     | 76.3       | 229,000    | 3,500   | 3,500     | 80.0       | 280,000    |
| Plumas          | ---     | ---       | ---        | ---        | ---     | ---       | ---        | ---        |
|                 | 6,000   | 5,000     | 66.0       | 330,000    | 5,500   | 5,000     | 68.4       | 342,000    |
| Alameda         | 1,000   | 1,000     | 75.0       | 75,000     | 2,000   | 2,000     | 47.0       | 94,000     |
| Contra Costa    | 3,500   | 3,000     | 77.3       | 232,000    | 4,500   | 4,000     | 69.8       | 279,000    |
| Lake            | ---     | ---       | ---        | ---        | ---     | ---       | ---        | ---        |
| Marin           | ---     | ---       | ---        | ---        | ---     | ---       | ---        | ---        |
| Monterey        | 4,500   | 3,500     | 41.1       | 144,000    | 5,500   | 4,500     | 42.2       | 190,000    |
| Napa            | ---     | ---       | ---        | ---        | ---     | ---       | ---        | ---        |
| San Benito      | 4,500   | 3,500     | 62.6       | 219,000    | 4,500   | 2,000     | 51.0       | 102,000    |
| San Francisco   | ---     | ---       | ---        | ---        | ---     | ---       | ---        | ---        |
| San Luis Obispo | 8,000   | 7,500     | 33.6       | 252,000    | 7,500   | 6,000     | 24.2       | 145,000    |
| San Mateo       | ---     | ---       | ---        | ---        | ---     | ---       | ---        | ---        |
| Santa Clara     | 2,000   | 1,500     | 83.3       | 125,000    | 2,000   | 1,500     | 78.0       | 117,000    |
| Santa Cruz      | ---     | ---       | ---        | ---        | ---     | ---       | ---        | ---        |
| Sonoma          | 1,500   | 1,000     | 45.0       | 45,000     | 1,500   | 1,000     | 44.0       | 44,000     |
|                 | 25,000  | 21,000    | 52.0       | 1,092,000  | 27,500  | 21,000    | 46.2       | 971,000    |
| Butte           | 10,000  | 9,000     | 77.2       | 695,000    | 10,000  | 7,000     | 45.7       | 320,000    |
| Colusa          | 45,000  | 43,000    | 85.8       | 3,690,000  | 40,000  | 30,000    | 57.1       | 1,714,000  |
| Glenn           | 29,000  | 27,000    | 79.0       | 2,134,000  | 26,500  | 18,000    | 57.9       | 1,043,000  |
| Sacramento      | 24,000  | 22,000    | 76.5       | 1,682,000  | 23,000  | 15,000    | 59.9       | 898,000    |
| Solano          | 40,000  | 37,000    | 76.1       | 2,814,000  | 40,500  | 33,000    | 53.0       | 1,749,000  |
| Sutter          | 23,000  | 22,000    | 85.4       | 1,878,000  | 23,500  | 17,000    | 60.9       | 1,036,000  |
| Tehama          | 5,000   | 5,000     | 53.0       | 265,000    | 4,500   | 3,500     | 27.7       | 97,000     |
| Yolo            | 74,000  | 69,000    | 80.4       | 5,551,000  | 66,000  | 51,000    | 63.1       | 3,217,000  |
| Yuba            | 1,000   | 1,000     | 87.0       | 87,000     | 1,000   | 500       | 64.0       | 32,000     |
|                 | 251,000 | 235,000   | 80.0       | 18,796,000 | 235,000 | 175,000   | 57.7       | 10,106,000 |
| Fresno          | 48,000  | 38,000    | 88.8       | 3,373,000  | 50,000  | 32,500    | 65.5       | 2,130,000  |
| Kern            | 52,000  | 42,000    | 65.7       | 2,758,000  | 50,000  | 36,000    | 61.5       | 2,215,000  |
| Kings           | 42,000  | 36,000    | 84.0       | 3,024,000  | 43,000  | 36,000    | 76.2       | 2,743,000  |
| Madera          | 21,000  | 18,000    | 78.2       | 1,407,000  | 20,500  | 15,500    | 74.1       | 1,149,000  |
| Merced          | 12,000  | 11,000    | 80.5       | 885,000    | 12,000  | 10,000    | 64.4       | 644,000    |
| San Joaquin     | 40,000  | 34,000    | 79.0       | 2,686,000  | 40,000  | 32,000    | 62.5       | 2,000,000  |
| Stanislaus      | 7,000   | 3,000     | 70.0       | 210,000    | 7,500   | 2,000     | 64.0       | 128,000    |
| Tulare          | 44,000  | 31,000    | 62.7       | 1,943,000  | 45,000  | 24,000    | 62.6       | 1,503,000  |
|                 | 266,000 | 213,000   | 76.5       | 16,286,000 | 268,000 | 188,000   | 66.6       | 12,512,000 |
| Alpine          | ---     | ---       | ---        | ---        | ---     | ---       | ---        | ---        |
| Amador          | ---     | ---       | ---        | ---        | ---     | ---       | ---        | ---        |
| Calaveras       | ---     | ---       | ---        | ---        | ---     | ---       | ---        | ---        |
| El Dorado       | ---     | ---       | ---        | ---        | ---     | ---       | ---        | ---        |
| Inyo            | ---     | ---       | ---        | ---        | ---     | ---       | ---        | ---        |
| Mariposa        | ---     | ---       | ---        | ---        | ---     | ---       | ---        | ---        |
| Mono            | ---     | ---       | ---        | ---        | ---     | ---       | ---        | ---        |
| Nevada          | ---     | ---       | ---        | ---        | ---     | ---       | ---        | ---        |
| Placer          | 2,000   | 2,000     | 58.0       | 116,000    | 3,000   | 2,500     | 46.4       | 116,000    |
| Sierra          | ---     | ---       | ---        | ---        | ---     | ---       | ---        | ---        |
| Tuolumne        | ---     | ---       | ---        | ---        | ---     | ---       | ---        | ---        |
|                 | 2,000   | 2,000     | 58.0       | 116,000    | 3,000   | 2,500     | 46.4       | 116,000    |
| Imperial        | 62,000  | 61,000    | 94.2       | 5,745,000  | 67,000  | 64,500    | 101.2      | 6,527,000  |
| Los Angeles     | 1,500   | 1,000     | 48.0       | 48,000     | 1,500   | 1,000     | 48.0       | 48,000     |
| Orange          | ---     | ---       | ---        | ---        | ---     | ---       | ---        | ---        |
| Riverside       | 22,000  | 19,000    | 62.5       | 1,187,000  | 28,000  | 24,000    | 56.1       | 1,347,000  |
| San Bernardino  | ---     | ---       | ---        | ---        | ---     | ---       | ---        | ---        |
| San Diego       | 3,000   | 3,000     | 46.3       | 139,000    | 3,000   | 3,000     | 46.7       | 140,000    |
| Santa Barbara   | 1,500   | 1,000     | 50.0       | 50,000     | 2,000   | 1,500     | 52.0       | 78,000     |
| Ventura         | ---     | ---       | ---        | ---        | ---     | ---       | ---        | ---        |
|                 | 90,000  | 85,000    | 84.3       | 7,169,000  | 101,500 | 94,000    | 86.6       | 8,140,000  |
| STATE           | 650,000 | 569,000   | 78.0       | 44,365,000 | 650,000 | 493,000   | 66.4       | 32,725,000 |

**CALIFORNIA FLORICULTURE: Production, Sales, and Value, 1994 <sup>1/</sup>**

| Kind                                | Number of Producers | Plants Grown | Production Area | Sales   |             |                               | Wholesale Price <sup>2/</sup> | Value of Sales at Wholesale |
|-------------------------------------|---------------------|--------------|-----------------|---------|-------------|-------------------------------|-------------------------------|-----------------------------|
|                                     |                     |              |                 | Unit    | Number Sold | Percent of Sales at Wholesale |                               |                             |
|                                     | Number              | 1,000        | 1,000 Sq. Ft.   | 1,000   | 1,000       | Percent                       | Dollars                       | \$1,000                     |
| Cut Flowers <sup>3/</sup>           | ---                 | ---          | ---             | ---     | ---         | ---                           | ---                           | 263,238                     |
| Carnations                          | ---                 | 17,301       | 12,669          | ---     | ---         | ---                           | ---                           | 22,392                      |
| Standard                            | 63                  | 10,029       | 7,882           | Blooms  | 96,598      | 100                           | 0.14                          | 13,939                      |
| Miniature                           | 67                  | 7,272        | 4,787           | Bunches | 6,308       | 98                            | 1.34                          | 8,453                       |
| Chrysanthemums                      | ---                 | 41,008       | 11,310          | ---     | ---         | ---                           | ---                           | 19,194                      |
| Standard                            | 15                  | 10,424       | 3,104           | Blooms  | 10,192      | 98                            | 0.46                          | 4,634                       |
| Pompon                              | 32                  | 30,584       | 8,206           | Bunches | 11,287      | 96                            | 1.29                          | 14,560                      |
| Roses                               | ---                 | 15,383       | 24,899          | ---     | 303,433     | ---                           | ---                           | 75,931                      |
| Hybrid Tea                          | 93                  | 13,904       | 22,827          | Blooms  | 264,444     | 99                            | 0.26                          | 69,311                      |
| Sweetheart                          | 47                  | 1,479        | 2,072           | Blooms  | 38,989      | 99                            | 0.17                          | 6,620                       |
| Others                              | 184                 | ---          | 197,272         | ---     | ---         | 99                            | ---                           | 137,892                     |
| Potted Flowering Plants             |                     |              |                 |         |             |                               |                               | 137,055                     |
| African Violets                     | 22                  | ---          | 1,220           | Pots    | 2,990       | 100                           | 1.00                          | 2,976                       |
| Chrysanthemums                      | 33                  | ---          | 4,432           | Pots    | 8,380       | 100                           | 2.67                          | 22,339                      |
| Cyclamens                           | 61                  | ---          | 1,369           | Pots    | 1,682       | 97                            | 2.33                          | 3,912                       |
| Finished Florist Azaleas            | 35                  | ---          | 906             | Pots    | 1,442       | 89                            | 4.32                          | 6,231                       |
| Kalanchoes                          | 20                  | ---          | 746             | Pots    | 1,304       | 100                           | 2.18                          | 2,839                       |
| Easter Lilies                       | 27                  | ---          | 773             | Pots    | 995         | 100                           | 3.81                          | 3,791                       |
| Other Lilies                        | 21                  | ---          | 131             | Pots    | 130         | 98                            | 4.04                          | 525                         |
| Poinsettias                         | 108                 | ---          | 9,994           | Pots    | 8,185       | 99                            | 3.45                          | 28,217                      |
| Others                              | 139                 | ---          | 15,016          | Pots    | 25,077      | 97                            | 2.64                          | 66,225                      |
| Foliage Plants                      |                     |              |                 |         |             |                               |                               | 86,634                      |
| Hanging Baskets                     | 67                  | ---          | ---             | Baskets | 4,637       | 94                            | 3.35                          | 15,534                      |
| Potted Foliage                      | 144                 | ---          | 17,767          | ---     | ---         | 95                            | ---                           | 71,100                      |
| Bedding/Garden Plants <sup>4/</sup> |                     |              |                 |         |             |                               |                               | 182,480                     |
| Flats                               |                     |              |                 |         |             |                               |                               | 121,756                     |
| Geraniums                           | 24                  | ---          | 298             | Flats   | 416         | 100                           | 9.70                          | 4,035                       |
| Impatiens                           | 60                  | ---          | 5,583           | Flats   | 2,302       | 98                            | 5.59                          | 12,868                      |
| Petunias                            | 62                  | ---          | 4,752           | Flats   | 1,962       | 98                            | 6.35                          | 12,459                      |
| Other (Include Foliar)              | 92                  | ---          | 28,579          | Flats   | 10,585      | 98                            | 7.84                          | 85,338                      |
| Vegetable Type                      | 49                  | ---          | 2,576           | Flats   | 920         | 97                            | 7.67                          | 7,056                       |
| Potted Hardy/Garden                 |                     |              |                 |         |             |                               |                               | 53,898                      |
| Chrysanthemums                      | 44                  | ---          | 3,043           | Pots    | 4,205       | 100                           | 0.89                          | 3,737                       |
| Geraniums (Cutting)                 | 44                  | ---          | 891             | Pots    | 1,837       | 100                           | 1.38                          | 2,538                       |
| Geraniums (Seed)                    | 29                  | ---          | 394             | Pots    | 941         | 99                            | 1.29                          | 1,218                       |
| Impatiens                           | 51                  | ---          | 2,526           | Pots    | 4,802       | 95                            | 0.77                          | 3,675                       |
| New Guinea Impatiens                | 32                  | ---          | 443             | Pots    | 517         | 99                            | 1.64                          | 849                         |
| Petunias                            | 30                  | ---          | 2,303           | Pots    | 4,187       | 97                            | 0.65                          | 2,737                       |
| Other (Include Foliar)              | 73                  | ---          | 20,477          | Pots    | 38,885      | 97                            | 0.93                          | 36,215                      |
| Vegetable Type                      | 32                  | ---          | 1,182           | Pots    | 3,839       | 100                           | 0.76                          | 2,929                       |
| Hanging Baskets                     |                     |              |                 |         |             |                               |                               | 6,043                       |
| Geraniums                           | 32                  | ---          | ---             | Baskets | 147         | 97                            | 6.10                          | 897                         |
| Impatiens                           | 32                  | ---          | ---             | Baskets | 150         | 98                            | 4.77                          | 716                         |
| New Guinea Impatiens                | 29                  | ---          | ---             | Baskets | 155         | 98                            | 6.27                          | 972                         |
| Petunias                            | 18                  | ---          | ---             | Baskets | 39          | 99                            | 5.59                          | 218                         |
| Flowering                           | 49                  | ---          | ---             | Baskets | 664         | 88                            | 4.88                          | 3,240                       |
| Total Cut Cultivated                | 35                  | ---          | 876             | ---     | ---         | 99                            | ---                           | 16,231                      |
| TOTAL ALL PLANTS <sup>5/</sup>      | 953                 |              |                 |         |             |                               |                               | 685,638                     |

<sup>1/</sup> The total covered growing area of 123,844,000 square feet consisted of the following: 17,359,000 square feet of shade and temporary cover; 16,456,000 square feet of glass; 44,008,000 square feet of fiberglass and other rigid greenhouses; and 46,021,000 square feet of film plastic (single/multi) greenhouses. In addition, plants were produced on 7,547 acres of open ground.

<sup>2/</sup> For potted plants, price represents a weighted average for plants sold in pots less than 5 inches and in pots 5 inches or more.

<sup>3/</sup> Total includes Gladioli, which are not published to avoid disclosure of individual operations.

<sup>4/</sup> Total includes New Guinea Impatiens, which are not published to avoid disclosure of individual operations.

<sup>5/</sup> Based on equivalent wholesale value of all sales for all crops, except potted foliage plants which are based on net value of sales.



**CALIFORNIA FLORICULTURE: Production, Sales, and Value, 1995 <sup>1/</sup>**

| Kind                                | Number of Producers | Plants Grown | Production Area | Sales   |             |                               | Wholesale Price <sup>2/</sup> | Value of Sales at Wholesale |
|-------------------------------------|---------------------|--------------|-----------------|---------|-------------|-------------------------------|-------------------------------|-----------------------------|
|                                     |                     |              |                 | Unit    | Number Sold | Percent of Sales at Wholesale |                               |                             |
|                                     | Number              | 1,000        | 1,000 Sq. Ft.   | 1,000   | 1,000       | Percent                       | Dollars                       | \$1,000                     |
| Cut Flowers <sup>3/</sup>           | ---                 | ---          | ---             | ---     | ---         | ---                           | ---                           | 252,985                     |
| Carnations                          | ---                 | 17,406       | 12,875          | ---     | ---         | ---                           | ---                           | 23,480                      |
| Standard                            | 62                  | 10,384       | 8,211           | Blooms  | 97,070      | 100                           | 0.14                          | 13,687                      |
| Miniature                           | 72                  | 7,022        | 4,664           | Bunches | 8,590       | 86                            | 1.14                          | 9,793                       |
| Chrysanthemums                      | ---                 | 40,002       | 11,983          | ---     | ---         | ---                           | ---                           | 19,829                      |
| Standard                            | 18                  | 10,571       | 3,303           | Blooms  | 9,813       | 96                            | 0.50                          | 4,871                       |
| Pompon                              | 35                  | 29,431       | 8,680           | Bunches | 12,465      | 97                            | 1.20                          | 14,958                      |
| Roses                               | ---                 | 13,171       | 21,962          | ---     | 269,328     | ---                           | ---                           | 68,869                      |
| Hybrid Tea                          | 82                  | 12,017       | 20,224          | Blooms  | 239,930     | 98                            | 0.27                          | 63,989                      |
| Sweetheart                          | 43                  | 1,154        | 1,738           | Blooms  | 29,398      | 100                           | 0.17                          | 4,880                       |
| Others                              | 171                 | ---          | 185,828         | ---     | ---         | 98                            | ---                           | 131,963                     |
| Potted Flowering Plants             |                     |              |                 |         |             |                               |                               | 126,440                     |
| African Violets                     | 20                  | ---          | 460             | Pots    | 1,807       | 100                           | 1.04                          | 1,982                       |
| Chrysanthemums                      | 32                  | ---          | 3,896           | Pots    | 8,031       | 99                            | 2.06                          | 20,265                      |
| Cyclamens                           | 57                  | ---          | 1,571           | Pots    | 1,928       | 99                            | 2.39                          | 4,610                       |
| Finished Florist Azaleas            | 26                  | ---          | 1,013           | Pots    | 1,527       | 89                            | 4.46                          | 6,809                       |
| Kalanchoes                          | 22                  | ---          | 640             | Pots    | 1,150       | 100                           | 2.17                          | 2,492                       |
| Easter Lilies                       | 29                  | ---          | 708             | Pots    | 957         | 100                           | 3.78                          | 3,617                       |
| Other Lilies                        | 21                  | ---          | 203             | Pots    | 227         | 99                            | 3.72                          | 844                         |
| Poinsettias                         | 101                 | ---          | 10,318          | ---     | 6,971       | 99                            | 3.79                          | 26,409                      |
| Others                              | 131                 | ---          | 14,163          | Pots    | 20,487      | 98                            | 2.90                          | 59,412                      |
| Foliage Plants                      |                     |              |                 |         |             |                               |                               | 85,356                      |
| Hanging Baskets                     | 61                  | ---          | ---             | Baskets | 6,076       | 90                            | 3.09                          | 18,775                      |
| Potted Foliage                      | 130                 | ---          | 17,152          | ---     | ---         | 98                            | ---                           | 66,581                      |
| Bedding/Garden Plants <sup>4/</sup> |                     |              |                 |         |             |                               |                               | 173,154                     |
| Flats                               | ---                 | ---          | ---             | ---     | ---         | ---                           | ---                           | 110,835                     |
| Geraniums                           | 28                  | ---          | 533             | Flats   | 238         | 92                            | 7.68                          | 1,828                       |
| Impatiens                           | 69                  | ---          | 4,794           | Flats   | 2,018       | 98                            | 6.70                          | 13,521                      |
| Petunias                            | 68                  | ---          | 5,042           | Flats   | 2,387       | 99                            | 7.32                          | 17,473                      |
| Other (Include Foliar)              | 79                  | ---          | 24,145          | Flats   | 9,165       | 98                            | 7.08                          | 64,888                      |
| Vegetable Type                      | 47                  | ---          | 4,195           | Flats   | 1,793       | 98                            | 7.32                          | 13,125                      |
| Potted Hardy/Garden                 |                     |              |                 |         |             |                               |                               | 54,274                      |
| Chrysanthemums                      | 36                  | ---          | 2,386           | Pots    | 3,358       | 99                            | 0.82                          | 2,752                       |
| Geraniums (Cutting)                 | 43                  | ---          | 1,282           | Pots    | 3,300       | 100                           | 1.25                          | 4,137                       |
| Geraniums (Seed)                    | 26                  | ---          | 431             | Pots    | 991         | 98                            | 1.28                          | 1,264                       |
| Impatiens                           | 46                  | ---          | 2,706           | Pots    | 4,863       | 95                            | 0.71                          | 3,472                       |
| New Guinea Impatiens                | 28                  | ---          | 636             | Pots    | 649         | 99                            | 1.67                          | 1,086                       |
| Petunias                            | 34                  | ---          | 1,884           | Pots    | 3,698       | 97                            | 0.61                          | 2,247                       |
| Other (Include Foliar)              | 82                  | ---          | 20,594          | Pots    | 32,679      | 96                            | 1.12                          | 36,600                      |
| Vegetable Type                      | 32                  | ---          | 1,152           | Pots    | 3,537       | 99                            | 0.77                          | 2,716                       |
| Hanging Baskets                     |                     |              |                 |         |             |                               |                               | 7,084                       |
| Geraniums                           | 43                  | ---          | ---             | Baskets | 256         | 98                            | 5.48                          | 1,403                       |
| Impatiens                           | 38                  | ---          | ---             | Baskets | 198         | 96                            | 4.82                          | 954                         |
| New Guinea Impatiens                | 31                  | ---          | ---             | Baskets | 153         | 97                            | 6.45                          | 987                         |
| Petunias                            | 25                  | ---          | ---             | Baskets | 41          | 97                            | 5.48                          | 225                         |
| Flowering                           | 43                  | ---          | ---             | Baskets | 630         | 94                            | 5.58                          | 3,515                       |
| Total Cut Cultivated                | 46                  | ---          | 912             | ---     | ---         | 100                           | ---                           | 16,344                      |
| TOTAL ALL PLANTS <sup>5/</sup>      | 952                 | ---          | ---             | ---     | ---         | ---                           | ---                           | 654,279                     |

<sup>1/</sup> The total covered growing area of 120,849,000 square feet consisted of the following: 15,162,000 square feet of shade and temporary cover; 13,764,000 square feet of glass; 42,305,000 square feet of fiberglass and other rigid greenhouses; and 49,618,000 square feet of film plastic (single/multi) greenhouses. In addition, plants were produced on 6,814 acres of open ground.

<sup>2/</sup> For potted plants, price represents a weighted average for plants sold in pots less than 5 inches and in pots 5 inches or more.

<sup>3/</sup> Total includes Gladioli, which are not published to avoid disclosure of individual operations.

<sup>4/</sup> Total includes New Guinea Impatiens, which are not published to avoid disclosure of individual operations.

<sup>5/</sup> Based on equivalent wholesale value of all sales for all crops, except potted foliage plants which are based on net value of sales.

# FRUIT AND NUT CROPS

## SUMMARY OF FRUIT AND NUT CROPS

California produced 13.1 million tons of fruit and nut crops in 1995, 8% less than 1994. The Golden State grew 39% of U.S. fruit and nut production in 1995, down from 42% last year. The total value of fruit and nut production was \$5.78 billion in 1995, up 1% from 1994. This was 55% of the U.S. total value. California accounts for virtually all of the U.S. production of dates, figs, kiwifruit, nectarines, olives, almonds, pistachios, and English walnuts.

California dominates U.S. production of apricots, avocados, grapes, lemons, plums, prunes, and strawberries. Several crops had major changes in production from 1994 to 1995. They include the following changes: apricots, down 64%; sweet cherries, down 62%; nectarines, down 27%; Cling peaches, down 23%; Freestone peaches, down 21%; pears, down 26%; plums, down 50%; almonds, down 50%; pecans up 93%, pistachios, up 15%; and avocados, up 12%.

Precipitation during the winter was well above normal. Several storms hit the State in March with strong winds, heavy rains, and flooding. Particularly hard hit were almonds where many trees were uprooted and the poor weather during the critical pollination period reduced the crop to the smallest since 1986. The strawberry crop also

suffered extreme damage, especially in Monterey and Santa Cruz counties. Many other fruit crops were also affected by the storms and production of some crops was down substantially. Because of the cool rainy weather, crop development was generally behind normal. However, mild weather during the summer and fall months permitted the crops to be harvested without any major difficulties.

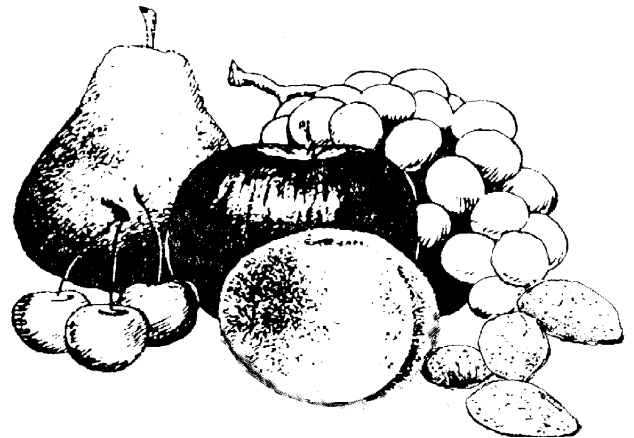

## ALL CALIFORNIA FRUIT AND NUTS

### Value of Utilized Production, 1986-95

Billion Dollars

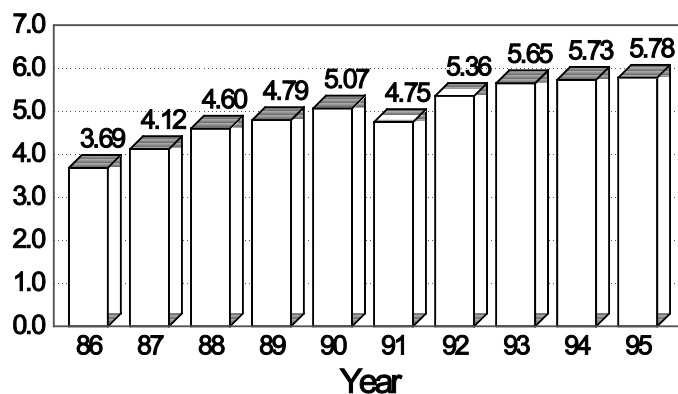

## NOTES FOR USERS

**Total production** is the quantity actually harvested plus quantities which would have been acceptable for fresh market or processing but were not harvested. It also includes fruit that was harvested but not sold due to marketing conditions.

**Utilized production** is the amount sold, plus the quantities used at home or held in storage. **Crop year production** for citrus and avocados are from the bloom of the first year shown. For example, 1995-96 would represent the 1996 production from the 1995 bloom.

**Utilization** refers to first, but not necessarily final, utilization. For example, frozen fruit used for preserves is included as frozen. **Canned** includes all canned products -- jam, jelly, baby food, nectar, juice, puree, and all fruit packs combined.

The price quoted is at the packinghouse door, which includes the transportation costs. Drying costs are excluded from prices on all fruit crops except grapes.

**Crop value** estimates cover the marketing season or crop year and should not be confused with **cash receipts** from these crops which are calculated on a single calendar year. The season average price is applied to utilized production to compute **value of production**.

Price and value for citrus fruits are based on equivalent packinghouse door returns for the entire data series. The processing price for berries is based on equivalent returns at the processing plant door. The fresh market price is on a packed and loaded basis, F.O.B. shipping point.

**CALIFORNIA NON-CITRUS FRUITS: Acreage, Production, Price And Value, 1986-95**

| Crop            | Crop Year | Bearing | Non-Bearing | Yield Per Acre | Total Production | Price 1/ | Total Value |
|-----------------|-----------|---------|-------------|----------------|------------------|----------|-------------|
|                 |           | Acres   |             | Tons           |                  | \$/Ton   | \$1,000     |
| Apples          | 1986      | 21,200  | 8,400       | 12.10          | 257,500          | 326.00   | 83,903      |
|                 | 1987      | 22,700  | 8,100       | 14.30          | 325,000          | 222.00   | 72,070      |
|                 | 1988      | 27,600  | 4,400       | 11.40          | 315,000          | 374.00   | 117,750     |
|                 | 1989      | 29,900  | 3,000       | 11.30          | 337,500          | 300.00   | 101,023     |
|                 | 1990      | 31,400  | 2,900       | 12.40          | 390,000          | 312.00   | 121,700     |
|                 | 1991      | 31,800  | 2,200       | 12.60          | 400,000          | 420.00   | 167,950     |
|                 | 1992      | 33,800  | 2,000       | 12.50          | 420,000          | 406.00   | 170,160     |
|                 | 1993      | 34,700  | 4,200       | 12.70          | 440,000          | 314.00   | 138,320     |
|                 | 1994      | 34,900  | 4,700       | 15.00          | 525,000          | 266.00   | 139,300     |
|                 | 1995      | 35,000  | 4,200       | 12.20          | 425,000          | 366.00   | 155,750     |
| Apricots        | 1986      | 18,500  | 1,400       | 2.70           | 50,000           | 371.00   | 18,564      |
|                 | 1987      | 18,000  | 2,500       | 6.11           | 110,000          | 333.00   | 33,970      |
|                 | 1988      | 17,900  | 2,800       | 5.31           | 95,000           | 340.00   | 29,613      |
|                 | 1989      | 17,400  | 3,000       | 6.78           | 118,000          | 323.00   | 37,821      |
|                 | 1990      | 16,900  | 3,200       | 6.80           | 115,000          | 323.00   | 36,536      |
|                 | 1991      | 17,300  | 2,600       | 5.20           | 90,000           | 374.00   | 32,183      |
|                 | 1992      | 18,100  | 2,700       | 5.47           | 99,000           | 328.00   | 32,458      |
|                 | 1993      | 19,300  | 1,500       | 4.61           | 89,000           | 363.00   | 32,288      |
|                 | 1994      | 19,800  | N/A         | 7.32           | 145,000          | 331.00   | 43,700      |
|                 | 1995      | 19,800  | N/A         | 2.63           | 52,000           | 392.00   | 20,405      |
| Avocados        | 85-86     | 74,500  | 1,300       | 2.15           | 160,000          | 1,020.00 | 163,200     |
|                 | 86-87     | 75,000  | 1,000       | 3.71           | 278,000          | 338.00   | 93,964      |
|                 | 87-88     | 74,800  | 700         | 2.41           | 180,000          | 1,140.00 | 205,200     |
|                 | 88-89     | 75,200  | 700         | 2.19           | 165,000          | 1,260.00 | 207,900     |
|                 | 89-90     | 75,000  | 600         | 1.40           | 105,000          | 2,280.00 | 239,400     |
|                 | 90-91     | 74,200  | 400         | 1.83           | 136,000          | 1,410.00 | 191,760     |
|                 | 91-92     | 73,500  | 400         | 2.12           | 156,000          | 1,170.00 | 182,520     |
|                 | 92-93     | 72,900  | 300         | 3.90           | 284,000          | 400.00   | 113,600     |
|                 | 93-94     | 72,500  | N/A         | 1.92           | 139,000          | 1,810.00 | 251,590     |
|                 | 94-95     | 67,600  | N/A         | 2.31           | 156,000          | 1,490.00 | 232,440     |
| Cherries, Sweet | 1986      | 10,400  | 1,500       | 0.81           | 8,400            | 1,220.00 | 10,211      |
|                 | 1987      | 10,300  | 1,500       | 4.37           | 45,000           | 636.00   | 28,615      |
|                 | 1988      | 10,000  | 2,000       | 2.60           | 26,000           | 771.00   | 20,040      |
|                 | 1989      | 10,300  | 2,400       | 2.52           | 26,000           | 939.00   | 24,418      |
|                 | 1990      | 10,600  | 2,700       | 2.08           | 22,000           | 891.00   | 19,610      |
|                 | 1991      | 10,800  | 2,600       | 3.33           | 36,000           | 957.00   | 34,434      |
|                 | 1992      | 11,200  | 3,000       | 2.77           | 31,000           | 1,240.00 | 38,342      |
|                 | 1993      | 11,700  | 2,700       | 1.62           | 19,000           | 2,270.00 | 43,203      |
|                 | 1994      | 12,100  | N/A         | 4.30           | 52,000           | 1,220.00 | 63,512      |
|                 | 1995      | 12,500  | N/A         | 1.58           | 19,800           | 2,100.00 | 41,540      |
| Dates           | 1986      | 4,500   | 1,300       | 3.96           | 17,800           | 828.00   | 14,738      |
|                 | 1987      | 4,900   | 1,100       | 3.96           | 19,400           | 872.00   | 16,917      |
|                 | 1988      | 5,100   | 1,200       | 4.31           | 22,000           | 896.00   | 19,712      |
|                 | 1989      | 5,000   | 1,000       | 4.40           | 22,000           | 1,040.00 | 22,880      |
|                 | 1990      | 5,000   | 900         | 4.80           | 24,000           | 820.00   | 19,680      |
|                 | 1991      | 5,200   | 600         | 4.23           | 22,000           | 970.00   | 21,340      |
|                 | 1992      | 5,300   | 400         | 3.96           | 21,000           | 1,060.00 | 22,260      |
|                 | 1993      | 5,500   | 200         | 5.27           | 29,000           | 790.00   | 22,910      |
|                 | 1994      | 5,500   | N/A         | 4.18           | 23,000           | 750.00   | 17,250      |
|                 | 1995      | 5,500   | N/A         | 4.00           | 22,000           | 748.00   | 16,456      |

See Footnotes on Page 21.

**CALIFORNIA NON-CITRUS FRUITS: Acreage, Production, Price And Value, 1986-95**

| Crop                               | Crop Year | Bearing | Non-Bearing | Yield Per Acre | Total Production | Price <u>1/</u> | Total Value |
|------------------------------------|-----------|---------|-------------|----------------|------------------|-----------------|-------------|
|                                    |           | Acres   |             | Tons           |                  | \$/Ton          | \$1,000     |
| Figs                               | 1986      | 18,000  | 500         | 2.78           | 50,000           | 283.00          | 14,173      |
|                                    | 1987      | 18,100  | 100         | 2.89           | 52,300           | 331.00          | 17,336      |
|                                    | 1988      | 17,700  | 60          | 3.14           | 55,500           | 352.00          | 19,530      |
|                                    | 1989      | 16,900  | 50          | 2.84           | 48,000           | 379.00          | 18,198      |
|                                    | 1990      | 16,700  | 300         | 2.97           | 49,600           | 350.00          | 17,370      |
|                                    | 1991      | 16,000  | 400         | 2.82           | 45,100           | 369.00          | 16,626      |
|                                    | 1992      | 14,400  | 500         | 3.26           | 46,900           | 405.00          | 18,985      |
|                                    | 1993      | 12,200  | 500         | 4.98           | 60,700           | 401.00          | 24,341      |
|                                    | 1994      | 14,600  | N/A         | 3.88           | 56,700           | 419.00          | 23,768      |
|                                    | 1995      | 15,000  | N/A         | 3.33           | 50,000           | 367.00          | 18,357      |
| Grapes, All <u>2/</u> <u>6/</u>    | 1986      | 670,700 | 36,900      | 7.68           | 4,770,000        | 222.00          | 1,060,245   |
|                                    | 1987      | 662,800 | 38,700      | 7.19           | 4,660,000        | 258.00          | 1,202,840   |
|                                    | 1988      | 656,400 | 46,500      | 8.74           | 5,520,000        | 263.00          | 1,451,883   |
|                                    | 1989      | 641,700 | 58,100      | 8.40           | 5,390,000        | 314.00          | 1,692,085   |
|                                    | 1990      | 639,000 | 61,500      | 8.11           | 5,185,000        | 291.00          | 1,508,045   |
|                                    | 1991      | 636,500 | 58,500      | 8.08           | 4,980,000        | 314.00          | 1,562,627   |
|                                    | 1992      | 644,300 | 48,600      | 8.64           | 5,460,000        | 309.00          | 1,687,225   |
|                                    | 1993      | 655,800 | 40,400      | 8.47           | 5,383,000        | 340.00          | 1,828,330   |
|                                    | 1994      | 654,800 | 51,900      | 8.03           | 5,256,000        | 326.00          | 1,712,939   |
|                                    | 1995      | 645,200 | 71,600      | 8.46           | 5,248,000        | 350.00          | 1,838,900   |
| Grapes, Raisin <u>2/</u> <u>3/</u> | 1986      | 277,000 | 3,900       | 9.01           | 2,045,000        | 213.00          | 434,665     |
|                                    | 1987      | 275,000 | 2,900       | 8.35           | 2,170,000        | 223.00          | 483,870     |
|                                    | 1988      | 274,000 | 4,400       | 10.30          | 2,570,000        | 205.00          | 525,830     |
|                                    | 1989      | 271,000 | 7,000       | 9.48           | 2,570,000        | 258.00          | 663,880     |
|                                    | 1990      | 270,000 | 8,000       | 8.69           | 2,345,000        | 237.00          | 554,901     |
|                                    | 1991      | 266,000 | 10,100      | 8.80           | 2,165,000        | 247.00          | 535,127     |
|                                    | 1992      | 267,000 | 10,100      | 10.50          | 2,670,000        | 230.00          | 614,595     |
|                                    | 1993      | 266,000 | 10,200      | 9.57           | 2,354,000        | 255.00          | 599,404     |
|                                    | 1994      | 270,000 | 8,500       | 8.85           | 2,389,000        | 229.00          | 547,002     |
|                                    | 1995      | 268,000 | 8,700       | 9.28           | 2,255,000        | 220.00          | 496,860     |
| Grapes, Table                      | 1986      | 81,700  | 12,400      | 7.59           | 620,000          | 307.00          | 190,140     |
|                                    | 1987      | 83,800  | 10,200      | 6.44           | 540,000          | 435.00          | 235,040     |
|                                    | 1988      | 85,400  | 7,400       | 9.02           | 770,000          | 363.00          | 279,363     |
|                                    | 1989      | 80,700  | 8,700       | 7.81           | 630,000          | 449.00          | 283,005     |
|                                    | 1990      | 78,000  | 9,300       | 8.27           | 645,000          | 429.00          | 276,874     |
|                                    | 1991      | 75,500  | 9,900       | 8.21           | 620,000          | 438.00          | 271,700     |
|                                    | 1992      | 77,300  | 7,000       | 8.34           | 645,000          | 356.00          | 229,630     |
|                                    | 1993      | 77,800  | 5,000       | 8.12           | 632,000          | 574.00          | 362,544     |
|                                    | 1994      | 77,800  | 6,200       | 7.74           | 602,000          | 515.00          | 310,022     |
|                                    | 1995      | 76,200  | 9,300       | 9.42           | 718,000          | 525.00          | 376,890     |
| Grapes, Wine                       | 1986      | 312,000 | 20,600      | 6.75           | 2,105,000        | 207.00          | 435,440     |
|                                    | 1987      | 304,000 | 25,600      | 6.41           | 1,950,000        | 248.00          | 483,930     |
|                                    | 1988      | 297,000 | 34,700      | 7.34           | 2,180,000        | 297.00          | 646,690     |
|                                    | 1989      | 290,000 | 42,400      | 7.55           | 2,190,000        | 340.00          | 745,200     |
|                                    | 1990      | 291,000 | 44,200      | 7.54           | 2,195,000        | 308.00          | 676,270     |
|                                    | 1991      | 295,000 | 38,500      | 7.44           | 2,195,000        | 344.00          | 755,800     |
|                                    | 1992      | 300,000 | 31,500      | 7.15           | 2,145,000        | 393.00          | 843,000     |
|                                    | 1993      | 312,000 | 25,200      | 7.68           | 2,397,000        | 361.00          | 866,382     |
|                                    | 1994      | 307,000 | 37,200      | 7.38           | 2,265,000        | 378.00          | 855,915     |
|                                    | 1995      | 301,000 | 53,500      | 7.56           | 2,275,000        | 424.00          | 965,150     |

See Footnotes on Page 21.

**CALIFORNIA NON-CITRUS FRUITS: Acreage, Production, Price And Value, 1986-95**

| Crop                          | Crop Year | Bearing | Non-Bearing | Yield Per Acre | Total Production | Price <u>1/</u> | Total Value |
|-------------------------------|-----------|---------|-------------|----------------|------------------|-----------------|-------------|
|                               |           | Acres   |             | Tons           |                  | \$/Ton          | \$1,000     |
| Kiwifruit                     | 1986      | 5,600   | 1,300       | 4.34           | 24,300           | 1,030.00        | 24,102      |
|                               | 1987      | 6,800   | 800         | 4.26           | 29,000           | 710.00          | 18,886      |
|                               | 1988      | 7,100   | 700         | 4.61           | 32,700           | 760.00          | 22,420      |
|                               | 1989      | 7,200   | 500         | 5.56           | 40,000           | 400.00          | 14,800      |
|                               | 1990      | 7,300   | 300         | 5.34           | 39,000           | 415.00          | 14,110      |
|                               | 1991      | 7,300   | 50          | 4.05           | 29,600           | 820.00          | 21,976      |
|                               | 1992      | 7,300   | 40          | 7.16           | 52,300           | 290.00          | 13,833      |
|                               | 1993      | 7,200   | 10          | 6.83           | 49,200           | 370.00          | 16,502      |
|                               | 1994      | 6,900   | N/A         | 5.71           | 39,400           | 491.00          | 18,413      |
|                               | 1995      | 6,600   | N/A         | 5.76           | 38,000           | 473.00          | 15,089      |
| Nectarines                    | 1986      | 22,800  | 3,200       | 7.54           | 172,000          | 440.00          | 75,720      |
|                               | 1987      | 23,600  | 3,300       | 8.09           | 191,000          | 343.00          | 65,545      |
|                               | 1988      | 25,300  | 4,300       | 8.58           | 217,000          | 394.00          | 85,594      |
|                               | 1989      | 24,400  | 4,200       | 9.02           | 220,000          | 398.00          | 87,645      |
|                               | 1990      | 25,500  | 4,300       | 9.10           | 232,000          | 474.00          | 109,999     |
|                               | 1991      | 26,400  | 4,700       | 8.14           | 215,000          | 402.00          | 86,457      |
|                               | 1992      | 26,500  | 9,300       | 8.91           | 236,000          | 312.00          | 73,710      |
|                               | 1993      | 27,100  | 8,300       | 7.56           | 205,000          | 500.00          | 102,421     |
|                               | 1994      | 28,800  | N/A         | 8.40           | 242,000          | 282.00          | 68,168      |
|                               | 1995      | 32,400  | N/A         | 5.43           | 176,000          | 534.00          | 93,990      |
| Olives <u>4/</u>              | 1986      | 32,300  | 1,600       | 3.45           | 111,500          | 587.00          | 65,407      |
|                               | 1987      | 31,600  | 1,900       | 2.14           | 67,500           | 608.00          | 41,053      |
|                               | 1988      | 31,500  | 2,700       | 2.78           | 87,500           | 518.00          | 45,316      |
|                               | 1989      | 29,800  | 3,400       | 4.13           | 123,000          | 467.00          | 57,458      |
|                               | 1990      | 30,400  | 4,000       | 4.33           | 131,500          | 423.00          | 55,663      |
|                               | 1991      | 29,700  | 4,400       | 2.19           | 65,000           | 559.00          | 36,306      |
|                               | 1992      | 30,100  | 4,600       | 5.48           | 165,000          | 549.00          | 90,561      |
|                               | 1993      | 30,100  | 4,400       | 4.05           | 122,000          | 467.00          | 56,991      |
|                               | 1994      | 32,000  | N/A         | 2.63           | 84,000           | 464.00          | 38,994      |
|                               | 1995      | 33,700  | N/A         | 2.30           | 77,500           | 613.00          | 47,528      |
| Peaches, All                  | 1986      | 54,300  | 9,800       | 13.10          | 714,000          | 207.00          | 141,882     |
|                               | 1987      | 54,800  | 10,400      | 13.10          | 715,500          | 219.00          | 149,002     |
|                               | 1988      | 54,700  | 12,000      | 14.10          | 770,000          | 242.00          | 177,672     |
|                               | 1989      | 54,600  | 14,100      | 14.10          | 770,500          | 249.00          | 183,672     |
|                               | 1990      | 54,600  | 15,500      | 14.80          | 806,000          | 263.00          | 204,305     |
|                               | 1991      | 54,400  | 16,100      | 15.20          | 828,500          | 236.00          | 188,644     |
|                               | 1992      | 59,500  | 14,900      | 15.30          | 912,500          | 228.00          | 200,146     |
|                               | 1993      | 59,700  | 14,400      | 14.20          | 850,000          | 248.00          | 203,105     |
|                               | 1994      | 60,300  | N/A         | 14.60          | 882,000          | 193.00          | 165,388     |
|                               | 1995      | 60,600  | N/A         | 11.30          | 683,500          | 277.00          | 183,485     |
| Peaches, Clingstone <u>4/</u> | 1986      | 29,300  | 6,600       | 15.90          | 466,500          | 168.00          | 73,374      |
|                               | 1987      | 28,900  | 6,700       | 15.90          | 460,000          | 189.00          | 80,750      |
|                               | 1988      | 27,600  | 7,900       | 18.40          | 508,500          | 207.00          | 98,072      |
|                               | 1989      | 27,600  | 10,200      | 18.00          | 496,000          | 214.00          | 98,868      |
|                               | 1990      | 27,000  | 11,900      | 18.70          | 506,000          | 214.00          | 102,185     |
|                               | 1991      | 26,200  | 12,600      | 19.70          | 515,000          | 218.00          | 105,730     |
|                               | 1992      | 30,700  | 8,500       | 19.30          | 591,500          | 215.00          | 120,636     |
|                               | 1993      | 30,200  | 9,000       | 18.20          | 548,500          | 218.00          | 113,033     |
|                               | 1994      | 30,200  | N/A         | 18.70          | 565,000          | 180.00          | 97,470      |
|                               | 1995      | 28,100  | N/A         | 15.40          | 432,500          | 220.00          | 90,310      |

See Footnotes on Page 21.

**CALIFORNIA NON-CITRUS FRUITS: Acreage, Production, Price And Value, 1986-95**

| Crop               | Crop Year | Bearing | Non-Bearing | Yield Per Acre | Total Production | Price 1/ | Total Value |
|--------------------|-----------|---------|-------------|----------------|------------------|----------|-------------|
|                    |           | Acres   |             | Tons           |                  | \$/Ton   | \$1,000     |
| Peaches, Freestone | 1986      | 25,000  | 3,200       | 9.90           | 247,500          | 276.00   | 68,508      |
|                    | 1987      | 25,900  | 3,700       | 9.86           | 255,500          | 268.00   | 68,252      |
|                    | 1988      | 27,100  | 4,100       | 9.65           | 261,500          | 304.00   | 79,600      |
|                    | 1989      | 27,000  | 3,900       | 10.20          | 274,500          | 308.00   | 84,804      |
|                    | 1990      | 27,600  | 3,600       | 10.90          | 300,000          | 340.00   | 102,120     |
|                    | 1991      | 28,200  | 3,500       | 11.10          | 313,500          | 264.00   | 82,914      |
|                    | 1992      | 28,800  | 6,400       | 11.20          | 321,000          | 248.00   | 79,510      |
|                    | 1993      | 29,500  | 5,400       | 10.20          | 301,500          | 298.00   | 90,072      |
|                    | 1994      | 30,100  | N/A         | 10.60          | 317,000          | 214.00   | 67,918      |
|                    | 1995      | 32,500  | N/A         | 7.70           | 251,000          | 372.00   | 93,175      |
| Pears, All         | 1986      | 23,100  | 2,100       | 12.70          | 294,000          | 232.00   | 68,140      |
|                    | 1987      | 23,100  | 1,900       | 14.60          | 337,000          | 192.00   | 64,794      |
|                    | 1988      | 23,300  | 2,100       | 13.00          | 302,000          | 247.00   | 74,540      |
|                    | 1989      | 23,500  | 2,300       | 13.40          | 315,000          | 271.00   | 85,250      |
|                    | 1990      | 23,300  | 2,300       | 14.20          | 332,000          | 251.00   | 83,248      |
|                    | 1991      | 23,400  | 1,900       | 13.50          | 317,000          | 263.00   | 83,403      |
|                    | 1992      | 23,900  | 1,500       | 14.10          | 338,000          | 246.00   | 83,156      |
|                    | 1993      | 24,100  | 1,000       | 12.80          | 308,000          | 256.00   | 78,848      |
|                    | 1994      | 24,300  | N/A         | 14.90          | 363,000          | 191.00   | 69,327      |
|                    | 1995      | 23,900  | N/A         | 11.20          | 267,000          | 237.00   | 63,187      |
| Pears, Bartlett    | 1986      | 21,900  | 400         | 13.00          | 285,000          | 223.00   | 63,445      |
|                    | 1987      | 21,700  | 300         | 15.00          | 325,000          | 176.00   | 57,058      |
|                    | 1988      | 21,400  | 300         | 13.60          | 291,000          | 238.00   | 69,290      |
|                    | 1989      | 20,900  | 200         | 14.30          | 298,000          | 265.00   | 79,040      |
|                    | 1990      | 20,200  | 200         | 15.50          | 314,000          | 242.00   | 75,867      |
|                    | 1991      | 20,200  | 200         | 14.90          | 300,000          | 252.00   | 75,624      |
|                    | 1992      | 20,200  | 100         | 15.60          | 315,000          | 238.00   | 74,970      |
|                    | 1993      | 19,900  | 100         | 14.50          | 288,000          | 237.00   | 68,287      |
|                    | 1994      | 19,500  | N/A         | 17.10          | 333,000          | 183.00   | 60,904      |
|                    | 1995      | 19,100  | N/A         | 12.90          | 247,000          | 212.00   | 52,453      |
| Pears, Other       | 1986      | 1,200   | 1,700       | 7.50           | 9,000            | 522.00   | 4,695       |
|                    | 1987      | 1,400   | 1,600       | 8.57           | 12,000           | 645.00   | 7,736       |
|                    | 1988      | 1,900   | 1,800       | 5.79           | 11,000           | 477.00   | 5,250       |
|                    | 1989      | 2,600   | 2,100       | 6.54           | 17,000           | 365.00   | 6,210       |
|                    | 1990      | 3,100   | 2,100       | 5.81           | 18,000           | 410.00   | 7,381       |
|                    | 1991      | 3,200   | 1,700       | 5.31           | 17,000           | 458.00   | 7,779       |
|                    | 1992      | 3,700   | 1,400       | 6.22           | 23,000           | 356.00   | 8,186       |
|                    | 1993      | 4,200   | 900         | 4.76           | 20,000           | 528.00   | 10,561      |
|                    | 1994      | 4,800   | N/A         | 6.25           | 30,000           | 281.00   | 8,423       |
|                    | 1995      | 4,800   | N/A         | 4.17           | 20,000           | 537.00   | 10,734      |
| Plums              | 1986      | 38,200  | 4,700       | 3.98           | 152,000          | 657.00   | 99,857      |
|                    | 1987      | 39,900  | 4,600       | 6.14           | 245,000          | 308.00   | 75,361      |
|                    | 1988      | 42,800  | 4,300       | 5.05           | 216,000          | 475.00   | 102,661     |
|                    | 1989      | 41,100  | 4,000       | 5.26           | 216,000          | 445.00   | 96,146      |
|                    | 1990      | 41,800  | 3,300       | 5.33           | 223,000          | 603.00   | 134,412     |
|                    | 1991      | 42,400  | 2,600       | 5.14           | 218,000          | 449.00   | 97,894      |
|                    | 1992      | 42,400  | 1,700       | 5.90           | 250,000          | 252.00   | 63,033      |
|                    | 1993      | 41,200  | 3,500       | 4.49           | 185,000          | 508.00   | 93,954      |
|                    | 1994      | 41,600  | N/A         | 5.94           | 247,000          | 321.00   | 79,358      |
|                    | 1995      | 42,000  | N/A         | 2.95           | 124,000          | 950.00   | 117,849     |

See Footnotes on Page 21.

**CALIFORNIA NON-CITRUS FRUITS: Acreage, Production, Price And Value, 1986-95**

| Crop                                      | Crop Year | Bearing | Non-Bearing | Yield Per Acre | Total Production | Price <sup>1/</sup> | Total Value |
|-------------------------------------------|-----------|---------|-------------|----------------|------------------|---------------------|-------------|
|                                           |           | Acres   |             | Tons           |                  | \$/Ton              | \$1,000     |
| Pomegranates <sup>5/</sup>                | 1986      | 3,500   | 300         | 6.29           | 22,000           | 395.00              | 7,666       |
|                                           | 1987      | 3,400   | 300         | 5.44           | 18,500           | 340.00              | 5,617       |
|                                           | 1988      | 3,500   | 100         | 5.71           | 20,000           | 359.00              | 6,454       |
|                                           | 1989      | 3,100   | 300         | 6.13           | 19,000           | 273.00              | 4,906       |
|                                           | 1990      | ---     | ---         | ---            | ---              | ---                 | ---         |
|                                           | 1991      | ---     | ---         | ---            | ---              | ---                 | ---         |
|                                           | 1992      | ---     | ---         | ---            | ---              | ---                 | ---         |
|                                           | 1993      | ---     | ---         | ---            | ---              | ---                 | ---         |
|                                           | 1994      | ---     | ---         | ---            | ---              | ---                 | ---         |
|                                           | 1995      | ---     | ---         | ---            | ---              | ---                 | ---         |
| Prunes (Dried Basis) <sup>6/</sup>        | 1986      | 72,600  | 10,400      | 1.36           | 99,000           | 819.00              | 81,081      |
|                                           | 1987      | 75,600  | 7,700       | 3.03           | 229,000          | 734.00              | 168,086     |
|                                           | 1988      | 77,200  | 6,900       | 1.96           | 151,000          | 782.00              | 118,082     |
|                                           | 1989      | 77,400  | 6,500       | 2.92           | 226,000          | 779.00              | 176,054     |
|                                           | 1990      | 80,100  | 5,800       | 1.84           | 147,000          | 873.00              | 128,331     |
|                                           | 1991      | 80,200  | 6,500       | 2.33           | 187,000          | 940.00              | 175,780     |
|                                           | 1992      | 80,400  | 8,000       | 2.29           | 184,000          | 1,030.00            | 189,520     |
|                                           | 1993      | 78,200  | 8,400       | 1.55           | 121,000          | 1,120.00            | 135,520     |
|                                           | 1994      | 78,900  | 12,720      | 2.45           | 193,000          | 1,090.00            | 210,370     |
|                                           | 1995      | 78,800  | 20,000      | 2.30           | 181,000          | 1,040.00            | 188,240     |
| Miscellaneous Fruits & Nuts <sup>7/</sup> | 1986      | ---     | ---         | ---            | ---              | ---                 | ---         |
|                                           | 1987      | 13,389  | ---         | ---            | 676,810          | ---                 | 37,840      |
|                                           | 1988      | 13,750  | ---         | ---            | 587,680          | ---                 | 50,322      |
|                                           | 1989      | 13,750  | ---         | ---            | 597,670          | ---                 | 50,670      |
|                                           | 1990      | 13,750  | ---         | ---            | 597,680          | ---                 | 60,070      |
|                                           | 1991      | 8,859   | ---         | ---            | 609,345          | ---                 | 66,800      |
|                                           | 1992      | 8,700   | ---         | ---            | 600,000          | ---                 | 62,750      |
|                                           | 1993      | 6,600   | ---         | ---            | 600,000          | ---                 | 70,950      |
|                                           | 1994      | 6,600   | ---         | ---            | 600,000          | ---                 | 80,642      |
|                                           | 1995      | 6,600   | ---         | ---            | 600,000          | ---                 | 79,150      |

<sup>1/</sup> Return at processing plant door or packinghouse door.

<sup>2/</sup> Acres of raisin type grapes enrolled in the California Raisin Industry Diversion (RID) program were; in 1986, 50,000; in 1987, 15,000; in 1988, 25,000; in 1991, 20,000; in 1992, 12,500; in 1993, 20,000; in 1994, zero; in 1995, 25,000. These acres were deducted from bearing acres before calculating yield.

<sup>3/</sup> Raisin type production is the fresh equivalent of dried and not dried.

<sup>4/</sup> Total value based on grower return.

<sup>5/</sup> Reported as miscellaneous after 1989.

<sup>6/</sup> Acreage by county, variety, and year of planting for 1995 are available upon request.

<sup>7/</sup> These crops are almond hulls, black walnuts, jojobas (until 1991), limes, persimmons, pomegranates (starting in 1990), and in 1991, bushberries. Acres exclude almond hulls.

**DRYING RATIO -- TONS OF GREEN FRUIT REQUIRED TO PRODUCE ONE DRIED TON**

| Year | Apples | Apricots | Figs | Raisins | Freestone Peaches | Bartlett Pears | Prunes |
|------|--------|----------|------|---------|-------------------|----------------|--------|
| 1986 | 8.50   | 6.80     | 3.00 | 4.26    | 9.03              | 6.40           | 2.94   |
| 1987 | 8.30   | 7.90     | 3.00 | 4.02    | 9.00              | 7.10           | 2.98   |
| 1988 | 8.80   | 6.70     | 3.00 | 4.99    | 8.20              | 6.50           | 3.11   |
| 1989 | 9.10   | 6.40     | 3.00 | 4.30    | 8.40              | 5.90           | 3.33   |
| 1990 | 8.40   | 6.90     | 3.00 | 4.40    | 9.00              | 6.00           | 3.15   |
| 1991 | N/A    | 6.50     | 3.00 | 4.53    | 9.30              | 6.00           | 3.15   |
| 1992 | N/A    | 6.40     | 3.00 | 4.00    | 9.60              | 6.60           | 2.90   |
| 1993 | N/A    | 6.60     | 3.00 | 4.30    | 8.10              | 6.50           | 3.10   |
| 1994 | N/A    | 6.40     | 3.00 | 4.50    | 9.30              | 6.20           | 3.08   |
| 1995 | N/A    | 6.50     | 3.00 | 5.00    | 9.03              | 6.10           | 3.30   |



**CALIFORNIA NON-CITRUS FRUITS: Utilized Production  
And Average Grower Return Per Ton, By Utilization Category, 1986-95**

| Crop                         | Crop Year | Total Utilized Production | For Fresh Market |          | For Processing |        |          |        |
|------------------------------|-----------|---------------------------|------------------|----------|----------------|--------|----------|--------|
|                              |           |                           |                  |          | Total          |        | Canned   |        |
|                              |           |                           | Quantity         | Price    | Quantity       | Price  | Quantity | Price  |
|                              |           | Short Tons                | Tons             | \$/Ton   | Tons           | \$/Ton | Tons     | \$/Ton |
| Apples <u>1/</u>             | 1986      | 257,500                   | 108,500          | 614.00   | 149,000        | 115.00 | 24,500   | 142.00 |
|                              | 1987      | 325,000                   | 115,000          | 466.00   | 210,000        | 87.00  | 40,000   | 123.00 |
|                              | 1988      | 315,000                   | 152,500          | 640.00   | 162,500        | 123.00 | 22,000   | 156.00 |
|                              | 1989      | 337,500                   | 139,000          | 524.00   | 198,500        | 141.00 | 30,500   | 150.00 |
|                              | 1990      | 390,000                   | 155,000          | 582.00   | 235,000        | 134.00 | 40,000   | 159.00 |
|                              | 1991      | 400,000                   | 175,000          | 754.00   | 225,000        | 159.00 | 15,000   | 147.00 |
|                              | 1992      | 420,000                   | 185,000          | 714.00   | 235,000        | 162.00 | 15,000   | 187.00 |
|                              | 1993      | 440,000                   | 185,000          | 574.00   | 255,000        | 126.00 | 20,500   | 152.00 |
|                              | 1994      | 525,000                   | 175,000          | 568.00   | 350,000        | 113.00 | 45,000   | 145.00 |
|                              | 1995      | 425,000                   | 150,000          | 734.00   | 275,000        | 165.00 | 37,500   | 150.00 |
| Apricots                     | 1986      | 50,000                    | 6,300            | 1,060.00 | 43,700         | 272.00 | 27,000   | 263.00 |
|                              | 1987      | 102,000                   | 12,300           | 625.00   | 89,700         | 293.00 | 53,000   | 286.00 |
|                              | 1988      | 87,000                    | 12,600           | 626.00   | 74,400         | 292.00 | 44,500   | 282.00 |
|                              | 1989      | 117,000                   | 14,000           | 590.00   | 103,000        | 287.00 | 67,000   | 280.00 |
|                              | 1990      | 113,000                   | 17,000           | 568.00   | 96,000         | 280.00 | 64,000   | 274.00 |
|                              | 1991      | 86,000                    | 15,000           | 735.00   | 71,000         | 298.00 | 43,000   | 287.00 |
|                              | 1992      | 99,000                    | 17,000           | 496.00   | 82,000         | 293.00 | 53,000   | 282.00 |
|                              | 1993      | 89,000                    | 14,500           | 711.00   | 74,500         | 295.00 | 45,000   | 266.00 |
|                              | 1994      | 132,000                   | 20,000           | 477.00   | 112,000        | 305.00 | 71,000   | 303.00 |
|                              | 1995      | 52,000                    | 11,000           | 748.00   | 41,000         | 297.00 | 28,000   | 287.00 |
| Avocados <u>2/</u>           | 85-86     | 160,000                   | 160,000          | 1,020.00 | ---            | ---    | ---      | ---    |
|                              | 86-87     | 278,000                   | 278,000          | 338.00   | ---            | ---    | ---      | ---    |
|                              | 87-88     | 180,000                   | 180,000          | 1,140.00 | ---            | ---    | ---      | ---    |
|                              | 88-89     | 165,000                   | 153,000          | 1,260.00 | 12,000         | ---    | ---      | ---    |
|                              | 89-90     | 105,000                   | 93,000           | 2,280.00 | 12,000         | ---    | ---      | ---    |
|                              | 90-91     | 136,000                   | 124,000          | 1,410.00 | 12,000         | ---    | ---      | ---    |
|                              | 91-92     | 156,000                   | 143,000          | 1,170.00 | 13,000         | ---    | ---      | ---    |
|                              | 92-93     | 284,000                   | 265,000          | 400.00   | 19,000         | ---    | ---      | ---    |
|                              | 93-94     | 139,000                   | 132,000          | 1,810.00 | 7,000          | ---    | ---      | ---    |
|                              | 94-95     | 156,000                   | 152,700          | 1,490.00 | 3,300          | ---    | ---      | ---    |
| Cherries,<br>Sweet <u>3/</u> | 1986      | 8,400                     | 6,600            | 1,390.00 | 1,800          | 576.00 | ---      | ---    |
|                              | 1987      | 45,000                    | 34,000           | 686.00   | 11,000         | 481.00 | ---      | ---    |
|                              | 1988      | 26,000                    | 19,500           | 874.00   | 6,500          | 461.00 | ---      | ---    |
|                              | 1989      | 26,000                    | 18,500           | 1,120.00 | 7,500          | 493.00 | ---      | ---    |
|                              | 1990      | 22,000                    | 16,300           | 1,080.00 | 5,700          | 352.00 | ---      | ---    |
|                              | 1991      | 36,000                    | 27,000           | 1,050.00 | 9,000          | 667.00 | ---      | ---    |
|                              | 1992      | 31,000                    | 25,500           | 1,380.00 | 5,500          | 573.00 | ---      | ---    |
|                              | 1993      | 19,000                    | 14,500           | 2,820.00 | 4,500          | 514.00 | ---      | ---    |
|                              | 1994      | 52,000                    | 36,000           | 1,550.00 | 16,000         | 482.00 | ---      | ---    |
|                              | 1995      | 19,800                    | 11,000           | 3,410.00 | 8,800          | 458.00 | ---      | ---    |
| Dates                        | 1986      | 17,800                    | 17,800           | 828.00   | ---            | ---    | ---      | ---    |
|                              | 1987      | 19,400                    | 19,400           | 872.00   | ---            | ---    | ---      | ---    |
|                              | 1988      | 22,000                    | 22,000           | 896.00   | ---            | ---    | ---      | ---    |
|                              | 1989      | 22,000                    | 22,000           | 1,040.00 | ---            | ---    | ---      | ---    |
|                              | 1990      | 24,000                    | 24,000           | 820.00   | ---            | ---    | ---      | ---    |
|                              | 1991      | 22,000                    | 22,000           | 970.00   | ---            | ---    | ---      | ---    |
|                              | 1992      | 21,000                    | 21,000           | 1,060.00 | ---            | ---    | ---      | ---    |
|                              | 1993      | 29,000                    | 29,000           | 790.00   | ---            | ---    | ---      | ---    |
|                              | 1994      | 23,000                    | 23,000           | 750.00   | ---            | ---    | ---      | ---    |
|                              | 1995      | 22,000                    | 22,000           | 748.00   | ---            | ---    | ---      | ---    |

See Footnotes on Page 31.

**CALIFORNIA NON-CITRUS FRUITS: Utilized Production  
And Average Grower Return Per Ton, By Utilization Category, 1986-95**

| Crop                         | Crop Year | For Processing   |        |          |        |                     |        |             |          |
|------------------------------|-----------|------------------|--------|----------|--------|---------------------|--------|-------------|----------|
|                              |           | Juice or Crushed |        | Frozen   |        | Dried (Fresh Basis) |        | Dried Basis |          |
|                              |           | Quantity         | Price  | Quantity | Price  | Quantity            | Price  | Quantity    | Price    |
|                              |           | Tons             | \$/Ton | Tons     | \$/Ton | Tons                | \$/Ton | Tons        | \$/Ton   |
| Apples <u>1/</u>             | 1986      | 108,000          | 105.00 | ---      | ---    | ---                 | ---    | ---         | ---      |
|                              | 1987      | 146,000          | 72.00  | ---      | ---    | ---                 | ---    | ---         | ---      |
|                              | 1988      | 122,500          | 117.00 | ---      | ---    | ---                 | ---    | ---         | ---      |
|                              | 1989      | 142,000          | 142.00 | ---      | ---    | ---                 | ---    | ---         | ---      |
|                              | 1990      | 159,000          | 127.00 | ---      | ---    | ---                 | ---    | ---         | ---      |
|                              | 1991      | 157,500          | 157.00 | ---      | ---    | ---                 | ---    | ---         | ---      |
|                              | 1992      | 162,500          | 155.00 | ---      | ---    | ---                 | ---    | ---         | ---      |
|                              | 1993      | 175,000          | 122.00 | ---      | ---    | ---                 | ---    | ---         | ---      |
|                              | 1994      | 250,000          | 110.00 | ---      | ---    | ---                 | ---    | ---         | ---      |
|                              | 1995      | 200,000          | 165.00 | ---      | ---    | ---                 | ---    | ---         | ---      |
| Apricots                     | 1986      | ---              | ---    | 7,200    | 307.00 | 9,500               | 271.00 | 1,400       | 1,840.00 |
|                              | 1987      | ---              | ---    | 13,100   | 291.00 | 23,600              | 310.00 | 2,980       | 2,450.00 |
|                              | 1988      | ---              | ---    | 12,200   | 294.00 | 17,700              | 314.00 | 2,640       | 2,100.00 |
|                              | 1989      | ---              | ---    | 11,000   | 310.00 | 25,000              | 296.00 | 3,900       | 1,890.00 |
|                              | 1990      | ---              | ---    | 11,000   | 305.00 | 21,000              | 287.00 | 3,050       | 1,950.00 |
|                              | 1991      | ---              | ---    | 11,000   | 308.00 | 17,000              | 319.00 | 2,600       | 2,110.00 |
|                              | 1992      | ---              | ---    | 13,000   | 319.00 | 16,000              | 306.00 | 2,500       | 1,960.00 |
|                              | 1993      | ---              | ---    | 11,500   | 315.00 | 18,000              | 353.00 | 2,730       | 2,320.00 |
|                              | 1994      | ---              | ---    | 10,500   | 350.00 | 30,500              | 295.00 | 4,800       | 1,890.00 |
|                              | 1995      | ---              | ---    | 5,200    | 317.00 | 7,800               | 321.00 | 1,200       | 2,090.00 |
| Avocados <u>2/</u>           | 85-86     | ---              | ---    | ---      | ---    | ---                 | ---    | ---         | ---      |
|                              | 86-87     | ---              | ---    | ---      | ---    | ---                 | ---    | ---         | ---      |
|                              | 87-88     | ---              | ---    | ---      | ---    | ---                 | ---    | ---         | ---      |
|                              | 88-89     | ---              | ---    | ---      | ---    | ---                 | ---    | ---         | ---      |
|                              | 89-90     | ---              | ---    | ---      | ---    | ---                 | ---    | ---         | ---      |
|                              | 90-91     | ---              | ---    | ---      | ---    | ---                 | ---    | ---         | ---      |
|                              | 91-92     | ---              | ---    | ---      | ---    | ---                 | ---    | ---         | ---      |
|                              | 92-93     | ---              | ---    | ---      | ---    | ---                 | ---    | ---         | ---      |
|                              | 93-94     | ---              | ---    | ---      | ---    | ---                 | ---    | ---         | ---      |
|                              | 94-95     | ---              | ---    | ---      | ---    | ---                 | ---    | ---         | ---      |
| Cherries,<br>Sweet <u>3/</u> | 1986      | ---              | ---    | ---      | ---    | ---                 | ---    | ---         | ---      |
|                              | 1987      | ---              | ---    | ---      | ---    | ---                 | ---    | ---         | ---      |
|                              | 1988      | ---              | ---    | ---      | ---    | ---                 | ---    | ---         | ---      |
|                              | 1989      | ---              | ---    | ---      | ---    | ---                 | ---    | ---         | ---      |
|                              | 1990      | ---              | ---    | ---      | ---    | ---                 | ---    | ---         | ---      |
|                              | 1991      | ---              | ---    | ---      | ---    | ---                 | ---    | ---         | ---      |
|                              | 1992      | ---              | ---    | ---      | ---    | ---                 | ---    | ---         | ---      |
|                              | 1993      | ---              | ---    | ---      | ---    | ---                 | ---    | ---         | ---      |
|                              | 1994      | ---              | ---    | ---      | ---    | ---                 | ---    | ---         | ---      |
|                              | 1995      | ---              | ---    | ---      | ---    | ---                 | ---    | ---         | ---      |
| Dates                        | 1986      | ---              | ---    | ---      | ---    | ---                 | ---    | ---         | ---      |
|                              | 1987      | ---              | ---    | ---      | ---    | ---                 | ---    | ---         | ---      |
|                              | 1988      | ---              | ---    | ---      | ---    | ---                 | ---    | ---         | ---      |
|                              | 1989      | ---              | ---    | ---      | ---    | ---                 | ---    | ---         | ---      |
|                              | 1990      | ---              | ---    | ---      | ---    | ---                 | ---    | ---         | ---      |
|                              | 1991      | ---              | ---    | ---      | ---    | ---                 | ---    | ---         | ---      |
|                              | 1992      | ---              | ---    | ---      | ---    | ---                 | ---    | ---         | ---      |
|                              | 1993      | ---              | ---    | ---      | ---    | ---                 | ---    | ---         | ---      |
|                              | 1994      | ---              | ---    | ---      | ---    | ---                 | ---    | ---         | ---      |
|                              | 1995      | ---              | ---    | ---      | ---    | ---                 | ---    | ---         | ---      |

See Footnotes on Page 31.

**CALIFORNIA NON-CITRUS FRUITS: Utilized Production  
And Average Grower Return Per Ton, By Utilization Category, 1986-95**

| Crop                     | Crop Year | Total Utilized Production | For Fresh Market |        | For Processing |        |          |        |
|--------------------------|-----------|---------------------------|------------------|--------|----------------|--------|----------|--------|
|                          |           |                           |                  |        | Total          |        | Canned   |        |
|                          |           |                           | Quantity         | Price  | Quantity       | Price  | Quantity | Price  |
|                          |           | Short Tons                | Tons             | \$/Ton | Tons           | \$/Ton | Tons     | \$/Ton |
| Figs <u>4/</u>           | 1986      | 50,000                    | 1,400            | ---    | ---            | ---    | ---      | ---    |
|                          | 1987      | 52,300                    | 1,750            | ---    | ---            | ---    | ---      | ---    |
|                          | 1988      | 55,500                    | 1,500            | ---    | ---            | ---    | ---      | ---    |
|                          | 1989      | 48,000                    | 1,500            | ---    | ---            | ---    | ---      | ---    |
|                          | 1990      | 49,600                    | 1,600            | ---    | ---            | ---    | ---      | ---    |
|                          | 1991      | 45,100                    | 1,300            | ---    | ---            | ---    | ---      | ---    |
|                          | 1992      | 46,900                    | 1,300            | ---    | ---            | ---    | ---      | ---    |
|                          | 1993      | 60,700                    | 2,800            | ---    | ---            | ---    | ---      | ---    |
|                          | 1994      | 56,700                    | 2,100            | ---    | ---            | ---    | ---      | ---    |
|                          | 1995      | 50,000                    | 2,000            | ---    | ---            | ---    | ---      | ---    |
| Grapes, All <u>5/</u>    | 1986      | 4,770,000                 | 746,500          | 442.00 | 4,023,500      | 182.00 | 40,000   | 210.00 |
|                          | 1987      | 4,660,000                 | 685,000          | 519.00 | 3,975,000      | 213.00 | 40,000   | 220.00 |
|                          | 1988      | 5,520,000                 | 801,000          | 493.00 | 4,719,000      | 224.00 | 40,000   | 225.00 |
|                          | 1989      | 5,390,000                 | 760,000          | 592.00 | 4,630,000      | 268.00 | 40,000   | 235.00 |
|                          | 1990      | 5,185,000                 | 821,000          | 525.00 | 4,364,000      | 247.00 | 40,000   | 235.00 |
|                          | 1991      | 4,980,000                 | 773,000          | 537.00 | 4,207,000      | 273.00 | 41,000   | 249.00 |
|                          | 1992      | 5,460,000                 | 745,000          | 416.00 | 4,715,000      | 292.00 | 46,000   | 260.00 |
|                          | 1993      | 5,383,000                 | 774,000          | 670.00 | 4,609,000      | 284.00 | 45,000   | 256.00 |
|                          | 1994      | 5,256,000                 | 779,000          | 565.00 | 4,477,000      | 284.00 | 38,000   | 256.00 |
|                          | 1995      | 5,248,000                 | 837,000          | 607.00 | 4,411,000      | 302.00 | 35,000   | 257.00 |
| Grapes, Raisin <u>5/</u> | 1986      | 2,045,000                 | 320,000          | 512.00 | 1,725,000      | 157.00 | 40,000   | 210.00 |
|                          | 1987      | 2,170,000                 | 260,000          | 502.00 | 1,910,000      | 185.00 | 40,000   | 220.00 |
|                          | 1988      | 2,570,000                 | 305,000          | 469.00 | 2,265,000      | 169.00 | 40,000   | 225.00 |
|                          | 1989      | 2,570,000                 | 310,000          | 596.00 | 2,260,000      | 212.00 | 40,000   | 235.00 |
|                          | 1990      | 2,345,000                 | 307,000          | 513.00 | 2,038,000      | 195.00 | 40,000   | 235.00 |
|                          | 1991      | 2,165,000                 | 278,000          | 547.00 | 1,887,000      | 203.00 | 41,000   | 249.00 |
|                          | 1992      | 2,670,000                 | 285,000          | 374.00 | 2,385,000      | 213.00 | 46,000   | 260.00 |
|                          | 1993      | 2,354,000                 | 270,000          | 630.00 | 2,084,000      | 206.00 | 45,000   | 256.00 |
|                          | 1994      | 2,389,000                 | 270,000          | 472.00 | 2,119,000      | 198.00 | 38,000   | 256.00 |
|                          | 1995      | 2,255,000                 | 258,000          | 579.00 | 1,997,000      | 174.00 | 35,000   | 257.00 |
| Grapes, Table            | 1986      | 620,000                   | 376,500          | 419.00 | 243,500        | 133.00 | ---      | ---    |
|                          | 1987      | 540,000                   | 370,000          | 570.00 | 170,000        | 142.00 | ---      | ---    |
|                          | 1988      | 770,000                   | 441,000          | 535.00 | 329,000        | 132.00 | ---      | ---    |
|                          | 1989      | 630,000                   | 405,000          | 626.00 | 225,000        | 131.00 | ---      | ---    |
|                          | 1990      | 645,000                   | 464,000          | 546.00 | 181,000        | 130.00 | ---      | ---    |
|                          | 1991      | 620,000                   | 450,000          | 549.00 | 170,000        | 145.00 | ---      | ---    |
|                          | 1992      | 645,000                   | 415,000          | 458.00 | 230,000        | 172.00 | ---      | ---    |
|                          | 1993      | 632,000                   | 468,000          | 720.00 | 164,000        | 156.00 | ---      | ---    |
|                          | 1994      | 602,000                   | 464,000          | 628.00 | 138,000        | 135.00 | ---      | ---    |
|                          | 1995      | 718,000                   | 534,000          | 651.00 | 184,000        | 159.00 | ---      | ---    |
| Grapes, Wine             | 1986      | 2,105,000                 | 50,000           | 160.00 | 2,055,000      | 208.00 | ---      | ---    |
|                          | 1987      | 1,950,000                 | 55,000           | 254.00 | 1,895,000      | 248.00 | ---      | ---    |
|                          | 1988      | 2,180,000                 | 55,000           | 283.00 | 2,125,000      | 297.00 | ---      | ---    |
|                          | 1989      | 2,190,000                 | 45,000           | 258.00 | 2,145,000      | 342.00 | ---      | ---    |
|                          | 1990      | 2,195,000                 | 50,000           | 398.00 | 2,145,000      | 306.00 | ---      | ---    |
|                          | 1991      | 2,195,000                 | 45,000           | 360.00 | 2,150,000      | 344.00 | ---      | ---    |
|                          | 1992      | 2,145,000                 | 45,000           | 300.00 | 2,100,000      | 395.00 | ---      | ---    |
|                          | 1993      | 2,397,000                 | 36,000           | 325.00 | 2,361,000      | 362.00 | ---      | ---    |
|                          | 1994      | 2,265,000                 | 45,000           | 471.00 | 2,220,000      | 376.00 | ---      | ---    |
|                          | 1995      | 2,275,000                 | 45,000           | 238.00 | 2,230,000      | 428.00 | ---      | ---    |

See Footnotes on Page 31.

**CALIFORNIA NON-CITRUS FRUITS: Utilized Production  
And Average Grower Return Per Ton, By Utilization Category, 1986-95**

| Crop                        | Crop Year | For Processing   |        |          |        |                     |        |             |          |
|-----------------------------|-----------|------------------|--------|----------|--------|---------------------|--------|-------------|----------|
|                             |           | Juice or Crushed |        | Frozen   |        | Dried (Fresh Basis) |        | Dried Basis |          |
|                             |           | Quantity         | Price  | Quantity | Price  | Quantity            | Price  | Quantity    | Price    |
|                             |           | Tons             | \$/Ton | Tons     | \$/Ton | Tons                | \$/Ton | Tons        | \$/Ton   |
| Figs <u>4/</u>              | 1986      | ---              | ---    | ---      | ---    | 48,600              | 267.00 | 16,200      | 801.00   |
|                             | 1987      | ---              | ---    | ---      | ---    | 50,550              | 317.00 | 16,850      | 951.00   |
|                             | 1988      | ---              | ---    | ---      | ---    | 54,000              | 337.00 | 18,000      | 1,010.00 |
|                             | 1989      | ---              | ---    | ---      | ---    | 46,500              | 373.00 | 15,500      | 1,120.00 |
|                             | 1990      | ---              | ---    | ---      | ---    | 48,000              | 320.00 | 16,000      | 960.00   |
|                             | 1991      | ---              | ---    | ---      | ---    | 43,800              | 347.00 | 14,600      | 1,040.00 |
|                             | 1992      | ---              | ---    | ---      | ---    | 45,600              | 393.00 | 15,200      | 1,180.00 |
|                             | 1993      | ---              | ---    | ---      | ---    | 57,900              | 367.00 | 19,300      | 1,100.00 |
|                             | 1994      | ---              | ---    | ---      | ---    | 54,600              | 400.00 | 18,200      | 1,200.00 |
|                             | 1995      | ---              | ---    | ---      | ---    | 48,000              | 353.00 | 16,000      | 1,060.00 |
| Grapes,<br>All <u>5/</u>    | 1986      | 2,795,000        | 183.00 | ---      | ---    | 1,188,500           | 177.00 | 278,900     | 756.00   |
|                             | 1987      | 2,496,000        | 219.00 | ---      | ---    | 1,439,000           | 203.00 | 357,950     | 817.00   |
|                             | 1988      | 2,852,000        | 253.00 | ---      | ---    | 1,827,000           | 180.00 | 366,500     | 897.00   |
|                             | 1989      | 2,726,000        | 297.00 | ---      | ---    | 1,864,000           | 227.00 | 433,200     | 975.00   |
|                             | 1990      | 2,583,000        | 276.00 | ---      | ---    | 1,741,000           | 205.00 | 395,500     | 902.00   |
|                             | 1991      | 2,591,000        | 310.00 | ---      | ---    | 1,575,000           | 212.00 | 348,000     | 962.00   |
|                             | 1992      | 3,102,000        | 325.00 | ---      | ---    | 1,567,000           | 228.00 | 391,500     | 911.00   |
|                             | 1993      | 2,895,000        | 323.00 | ---      | ---    | 1,669,000           | 218.00 | 388,300     | 936.00   |
|                             | 1994      | 2,540,000        | 344.00 | ---      | ---    | 1,899,000           | 204.00 | 422,000     | 920.00   |
|                             | 1995      | 2,832,000        | 372.00 | ---      | ---    | 1,544,000           | 175.00 | 308,800     | 873.00   |
| Grapes,<br>Raisin <u>5/</u> | 1986      | 505,000          | 105.00 | ---      | ---    | 1,180,000           | 177.00 | 277,000     | 757.00   |
|                             | 1987      | 440,000          | 123.00 | ---      | ---    | 1,430,000           | 203.00 | 356,000     | 817.00   |
|                             | 1988      | 415,000          | 116.00 | ---      | ---    | 1,810,000           | 180.00 | 363,000     | 898.00   |
|                             | 1989      | 370,000          | 132.00 | ---      | ---    | 1,850,000           | 227.00 | 430,000     | 977.00   |
|                             | 1990      | 268,000          | 126.00 | ---      | ---    | 1,730,000           | 205.00 | 393,000     | 903.00   |
|                             | 1991      | 284,000          | 150.00 | ---      | ---    | 1,562,000           | 212.00 | 345,000     | 963.00   |
|                             | 1992      | 785,000          | 182.00 | ---      | ---    | 1,554,000           | 228.00 | 388,300     | 911.00   |
|                             | 1993      | 397,000          | 152.00 | ---      | ---    | 1,642,000           | 218.00 | 382,000     | 937.00   |
|                             | 1994      | 197,000          | 118.00 | ---      | ---    | 1,884,000           | 205.00 | 418,600     | 923.00   |
|                             | 1995      | 432,000          | 165.00 | ---      | ---    | 1,530,000           | 175.00 | 306,000     | 875.00   |
| Grapes,<br>Table            | 1986      | 235,000          | 133.00 | ---      | ---    | 8,500               | 130.00 | 1,900       | 582.00   |
|                             | 1987      | 161,000          | 140.00 | ---      | ---    | 9,000               | 174.00 | 1,950       | 783.00   |
|                             | 1988      | 312,000          | 131.00 | ---      | ---    | 17,000              | 158.00 | 3,500       | 767.00   |
|                             | 1989      | 211,000          | 128.00 | ---      | ---    | 14,000              | 176.00 | 3,200       | 770.00   |
|                             | 1990      | 170,000          | 127.00 | ---      | ---    | 11,000              | 183.00 | 2,500       | 805.00   |
|                             | 1991      | 157,000          | 141.00 | ---      | ---    | 13,000              | 194.00 | 3,000       | 842.00   |
|                             | 1992      | 217,000          | 170.00 | ---      | ---    | 13,000              | 213.00 | 3,200       | 866.00   |
|                             | 1993      | 137,000          | 147.00 | ---      | ---    | 27,000              | 204.00 | 6,300       | 874.00   |
|                             | 1994      | 123,000          | 136.00 | ---      | ---    | 15,000              | 125.00 | 3,400       | 550.00   |
|                             | 1995      | 170,000          | 162.00 | ---      | ---    | 14,000              | 120.00 | 2,800       | 600.00   |
| Grapes,<br>Wine             | 1986      | 2,055,000        | 208.00 | ---      | ---    | ---                 | ---    | ---         | ---      |
|                             | 1987      | 1,895,000        | 248.00 | ---      | ---    | ---                 | ---    | ---         | ---      |
|                             | 1988      | 2,125,000        | 297.00 | ---      | ---    | ---                 | ---    | ---         | ---      |
|                             | 1989      | 2,145,000        | 342.00 | ---      | ---    | ---                 | ---    | ---         | ---      |
|                             | 1990      | 2,145,000        | 306.00 | ---      | ---    | ---                 | ---    | ---         | ---      |
|                             | 1991      | 2,150,000        | 344.00 | ---      | ---    | ---                 | ---    | ---         | ---      |
|                             | 1992      | 2,100,000        | 395.00 | ---      | ---    | ---                 | ---    | ---         | ---      |
|                             | 1993      | 2,361,000        | 362.00 | ---      | ---    | ---                 | ---    | ---         | ---      |
|                             | 1994      | 2,220,000        | 376.00 | ---      | ---    | ---                 | ---    | ---         | ---      |
|                             | 1995      | 2,230,000        | 428.00 | ---      | ---    | ---                 | ---    | ---         | ---      |

See Footnotes on Page 31.

**CALIFORNIA NON-CITRUS FRUITS: Utilized Production  
And Average Grower Return Per Ton, By Utilization Category, 1986-95**

| Crop                                | Crop Year | Total Utilized Production | For Fresh Market |          | For Processing |        |          |        |
|-------------------------------------|-----------|---------------------------|------------------|----------|----------------|--------|----------|--------|
|                                     |           |                           | Quantity         | Price    | Total          |        | Canned   |        |
|                                     |           |                           |                  |          | Quantity       | Price  | Quantity | Price  |
|                                     |           | Short Tons                | Tons             | \$/Ton   | Tons           | \$/Ton | Tons     | \$/Ton |
| Kiwifruit                           | 1986      | 23,400                    | 23,400           | 1,030.00 | ---            | ---    | ---      | ---    |
|                                     | 1987      | 26,600                    | 26,600           | 710.00   | ---            | ---    | ---      | ---    |
|                                     | 1988      | 29,500                    | 29,500           | 760.00   | ---            | ---    | ---      | ---    |
|                                     | 1989      | 37,000                    | 37,000           | 400.00   | ---            | ---    | ---      | ---    |
|                                     | 1990      | 34,000                    | 34,000           | 415.00   | ---            | ---    | ---      | ---    |
|                                     | 1991      | 26,800                    | 26,800           | 820.00   | ---            | ---    | ---      | ---    |
|                                     | 1992      | 47,700                    | 47,700           | 290.00   | ---            | ---    | ---      | ---    |
|                                     | 1993      | 44,600                    | 44,600           | 370.00   | ---            | ---    | ---      | ---    |
|                                     | 1994      | 37,500                    | 37,500           | 491.00   | ---            | ---    | ---      | ---    |
|                                     | 1995      | 31,900                    | 31,900           | 473.00   | ---            | ---    | ---      | ---    |
| Nectarines <u>6/</u>                | 1986      | 172,000                   | 170,000          | ---      | 2,000          | ---    | ---      | ---    |
|                                     | 1987      | 191,000                   | 190,500          | ---      | 500            | ---    | ---      | ---    |
|                                     | 1988      | 217,000                   | 216,000          | ---      | 1,000          | ---    | ---      | ---    |
|                                     | 1989      | 220,000                   | 219,000          | ---      | 1,000          | ---    | ---      | ---    |
|                                     | 1990      | 232,000                   | 229,500          | ---      | 2,500          | ---    | ---      | ---    |
|                                     | 1991      | 215,000                   | 211,000          | ---      | 4,000          | ---    | ---      | ---    |
|                                     | 1992      | 236,000                   | 233,000          | ---      | 3,000          | ---    | ---      | ---    |
|                                     | 1993      | 205,000                   | 201,000          | ---      | 4,000          | ---    | ---      | ---    |
|                                     | 1994      | 242,000                   | 238,000          | ---      | 4,000          | ---    | ---      | ---    |
|                                     | 1995      | 176,000                   | 170,000          | ---      | 6,000          | ---    | ---      | ---    |
| Olives <u>7/</u>                    | 1986      | 111,500                   | 500              | 500.00   | 111,000        | 587.00 | 85,000   | 709.00 |
|                                     | 1987      | 67,500                    | 500              | 500.00   | 67,000         | 609.00 | 55,000   | 702.00 |
|                                     | 1988      | 87,500                    | 500              | 500.00   | 87,000         | 518.00 | 70,000   | 603.00 |
|                                     | 1989      | 123,000                   | 500              | 500.00   | 122,500        | 467.00 | 94,000   | 563.00 |
|                                     | 1990      | 131,500                   | 500              | 500.00   | 131,000        | 423.00 | 88,000   | 553.00 |
|                                     | 1991      | 65,000                    | 500              | 500.00   | 64,500         | 559.00 | 53,700   | 631.00 |
|                                     | 1992      | 165,000                   | 500              | 500.00   | 164,500        | 549.00 | 121,000  | 676.00 |
|                                     | 1993      | 122,000                   | 500              | 500.00   | 121,500        | 467.00 | 93,000   | 558.00 |
|                                     | 1994      | 84,000                    | 500              | 500.00   | 83,500         | 464.00 | 66,500   | 551.00 |
|                                     | 1995      | 77,500                    | 500              | 500.00   | 77,000         | 614.00 | 58,500   | 742.00 |
| Peaches,<br>All <u>8/</u>           | 1986      | 684,250                   | 151,000          | 354.00   | 533,250        | 168.00 | 460,750  | 168.00 |
|                                     | 1987      | 680,500                   | 155,000          | 334.00   | 525,500        | 184.00 | 449,000  | 188.00 |
|                                     | 1988      | 741,500                   | 160,000          | 396.00   | 573,000        | 199.00 | 495,150  | 206.00 |
|                                     | 1989      | 736,500                   | 174,500          | 392.00   | 562,000        | 205.00 | 484,200  | 213.00 |
|                                     | 1990      | 777,500                   | 192,000          | 434.00   | 585,500        | 207.00 | 497,100  | 214.00 |
|                                     | 1991      | 798,500                   | 201,000          | 314.00   | 597,500        | 210.00 | 503,700  | 218.00 |
|                                     | 1992      | 879,500                   | 215,000          | 286.00   | 664,500        | 208.00 | 573,900  | 215.00 |
|                                     | 1993      | 820,000                   | 193,000          | 370.00   | 627,000        | 210.00 | 533,200  | 217.00 |
|                                     | 1994      | 857,500                   | 220,000          | 232.00   | 638,500        | 179.00 | 556,600  | 181.00 |
|                                     | 1995      | 661,500                   | 161,300          | 482.00   | 500,200        | 211.00 | 422,500  | 219.00 |
| Peaches,<br>Clingstone<br><u>8/</u> | 1986      | 436,750                   | ---              | ---      | 436,750        | 168.00 | 436,750  | 168.00 |
|                                     | 1987      | 425,000                   | ---              | ---      | 425,000        | 189.00 | 425,000  | 189.00 |
|                                     | 1988      | 471,500                   | ---              | ---      | 471,500        | 207.00 | 471,500  | 207.00 |
|                                     | 1989      | 462,000                   | ---              | ---      | 462,000        | 214.00 | 462,000  | 214.00 |
|                                     | 1990      | 477,500                   | ---              | ---      | 477,500        | 214.00 | 477,500  | 214.00 |
|                                     | 1991      | 485,000                   | ---              | ---      | 485,000        | 218.00 | 485,000  | 218.00 |
|                                     | 1992      | 558,500                   | ---              | ---      | 558,500        | 215.00 | 558,500  | 215.00 |
|                                     | 1993      | 518,500                   | ---              | ---      | 518,500        | 218.00 | 518,500  | 218.00 |
|                                     | 1994      | 541,500                   | ---              | ---      | 541,500        | 180.00 | 541,500  | 180.00 |
|                                     | 1995      | 410,500                   | ---              | ---      | 410,500        | 220.00 | 410,500  | 220.00 |

See Footnotes on Page 31.

**CALIFORNIA NON-CITRUS FRUITS: Utilized Production  
And Average Grower Return Per Ton, By Utilization Category, 1986-95**

| Crop                                | Crop Year | For Processing   |        |             |        |                     |        |             |         |
|-------------------------------------|-----------|------------------|--------|-------------|--------|---------------------|--------|-------------|---------|
|                                     |           | Juice or Crushed |        | Frozen      |        | Dried (Fresh Basis) |        | Dried Basis |         |
|                                     |           | Quantity         | Price  | Quantity    | Price  | Quantity            | Price  | Quantity    | Price   |
|                                     |           | Tons             | \$/Ton | Tons        | \$/Ton | Tons                | \$/Ton | Tons        | \$/Ton  |
| Kiwifruit                           | 1986      | ---              | ---    | ---         | ---    | ---                 | ---    | ---         | ---     |
|                                     | 1987      | ---              | ---    | ---         | ---    | ---                 | ---    | ---         | ---     |
|                                     | 1988      | ---              | ---    | ---         | ---    | ---                 | ---    | ---         | ---     |
|                                     | 1989      | ---              | ---    | ---         | ---    | ---                 | ---    | ---         | ---     |
|                                     | 1990      | ---              | ---    | ---         | ---    | ---                 | ---    | ---         | ---     |
|                                     | 1991      | ---              | ---    | ---         | ---    | ---                 | ---    | ---         | ---     |
|                                     | 1992      | ---              | ---    | ---         | ---    | ---                 | ---    | ---         | ---     |
|                                     | 1993      | ---              | ---    | ---         | ---    | ---                 | ---    | ---         | ---     |
|                                     | 1994      | ---              | ---    | ---         | ---    | ---                 | ---    | ---         | ---     |
|                                     | 1995      | ---              | ---    | ---         | ---    | ---                 | ---    | ---         | ---     |
| Nectarines <u>6/</u>                | 1986      | ---              | ---    | ---         | ---    | ---                 | ---    | ---         | ---     |
|                                     | 1987      | ---              | ---    | ---         | ---    | ---                 | ---    | ---         | ---     |
|                                     | 1988      | ---              | ---    | ---         | ---    | ---                 | ---    | ---         | ---     |
|                                     | 1989      | ---              | ---    | ---         | ---    | ---                 | ---    | ---         | ---     |
|                                     | 1990      | ---              | ---    | ---         | ---    | ---                 | ---    | ---         | ---     |
|                                     | 1991      | ---              | ---    | ---         | ---    | ---                 | ---    | ---         | ---     |
|                                     | 1992      | ---              | ---    | ---         | ---    | ---                 | ---    | ---         | ---     |
|                                     | 1993      | ---              | ---    | ---         | ---    | ---                 | ---    | ---         | ---     |
|                                     | 1994      | ---              | ---    | ---         | ---    | ---                 | ---    | ---         | ---     |
|                                     | 1995      | ---              | ---    | ---         | ---    | ---                 | ---    | ---         | ---     |
| Olives <u>7/</u>                    | 1986      | 6,000            | 17.00  | - Limited - |        | - Undersize -       |        | ---         | ---     |
|                                     | 1987      | 3,000            | 15.00  | 20,000      | 240.00 | ---                 | ---    | ---         | ---     |
|                                     | 1988      | 3,000            | 13.00  | 9,000       | 236.00 | ---                 | ---    | ---         | ---     |
|                                     | 1989      | 5,500            | 12.00  | 8,500       | 310.00 | 5,500               | 28.00  | ---         | ---     |
|                                     | 1990      | 5,000            | 10.90  | 14,000      | 289.00 | 9,000               | 22.00  | ---         | ---     |
|                                     | 1991      | 5,000            | 10.90  | 22,000      | 295.00 | 16,000              | 13.90  | ---         | ---     |
|                                     | 1992      | 1,800            | 10.30  | 7,300       | 291.00 | 1,700               | 23.90  | ---         | ---     |
|                                     | 1993      | 5,700            | 10.50  | 31,500      | 266.00 | 6,300               | 10.50  | ---         | ---     |
|                                     | 1994      | 5,300            | 10.50  | 19,700      | 235.00 | 3,500               | 37.20  | ---         | ---     |
|                                     | 1995      | 4,400            | 11.00  | 8,400       | 234.00 | 4,200               | 14.00  | ---         | ---     |
| Peaches,<br>All <u>8/</u>           | 1986      | ---              | ---    | 56,250      | 165.00 | 16,250              | 96.00  | 1,800       | 864.00  |
|                                     | 1987      | ---              | ---    | 59,000      | 178.00 | 17,500              | 101.00 | 1,950       | 909.00  |
|                                     | 1988      | ---              | ---    | 57,250      | 165.00 | 20,600              | 117.00 | 2,500       | 960.00  |
|                                     | 1989      | ---              | ---    | 63,500      | 167.00 | 14,300              | 110.00 | 1,700       | 924.00  |
|                                     | 1990      | ---              | ---    | 74,850      | 178.00 | 13,550              | 108.00 | 1,500       | 975.00  |
|                                     | 1991      | ---              | ---    | 71,600      | 183.00 | 22,200              | 116.00 | 2,400       | 1080.00 |
|                                     | 1992      | ---              | ---    | 70,400      | 182.00 | 20,200              | 93.00  | 2,100       | 893.00  |
|                                     | 1993      | ---              | ---    | 78,800      | 185.00 | 15,000              | 82.00  | 1,850       | 713.00  |
|                                     | 1994      | ---              | ---    | 68,400      | 183.00 | 13,500              | 93.00  | 1,450       | 856.00  |
|                                     | 1995      | ---              | ---    | 63,700      | 186.00 | 14,000              | 86.00  | 1,550       | 894.00  |
| Peaches,<br>Clingstone<br><u>8/</u> | 1986      | ---              | ---    | ---         | ---    | ---                 | ---    | ---         | ---     |
|                                     | 1987      | ---              | ---    | ---         | ---    | ---                 | ---    | ---         | ---     |
|                                     | 1988      | ---              | ---    | ---         | ---    | ---                 | ---    | ---         | ---     |
|                                     | 1989      | ---              | ---    | ---         | ---    | ---                 | ---    | ---         | ---     |
|                                     | 1990      | ---              | ---    | ---         | ---    | ---                 | ---    | ---         | ---     |
|                                     | 1991      | ---              | ---    | ---         | ---    | ---                 | ---    | ---         | ---     |
|                                     | 1992      | ---              | ---    | ---         | ---    | ---                 | ---    | ---         | ---     |
|                                     | 1993      | ---              | ---    | ---         | ---    | ---                 | ---    | ---         | ---     |
|                                     | 1994      | ---              | ---    | ---         | ---    | ---                 | ---    | ---         | ---     |
|                                     | 1995      | ---              | ---    | ---         | ---    | ---                 | ---    | ---         | ---     |

See Footnotes on Page 31.

**CALIFORNIA NON-CITRUS FRUITS: Utilized Production  
And Average Grower Return Per Ton, By Utilization Category, 1986-95**

| Crop                         | Crop Year | Total Utilized Production | For Fresh Market |        | For Processing |        |          |        |
|------------------------------|-----------|---------------------------|------------------|--------|----------------|--------|----------|--------|
|                              |           |                           |                  |        | Total          |        | Canned   |        |
|                              |           |                           | Quantity         | Price  | Quantity       | Price  | Quantity | Price  |
|                              |           | Short Tons                | Tons             | \$/Ton | Tons           | \$/Ton | Tons     | \$/Ton |
| Peaches, Freestone <u>8/</u> | 1986      | 247,500                   | 151,000          | 354.00 | 96,500         | 156.00 | 24,000   | 177.00 |
|                              | 1987      | 255,500                   | 155,000          | 334.00 | 100,500        | 164.00 | 24,000   | 176.00 |
|                              | 1988      | 261,500                   | 160,000          | 396.00 | 101,500        | 160.00 | 23,650   | 181.00 |
|                              | 1989      | 274,500                   | 174,500          | 392.00 | 100,000        | 164.00 | 22,200   | 192.00 |
|                              | 1990      | 300,000                   | 192,000          | 434.00 | 108,000        | 174.00 | 19,600   | 204.00 |
|                              | 1991      | 313,500                   | 201,000          | 314.00 | 112,500        | 176.00 | 18,700   | 217.00 |
|                              | 1992      | 321,000                   | 215,000          | 286.00 | 106,000        | 170.00 | 15,400   | 213.00 |
|                              | 1993      | 301,500                   | 193,000          | 370.00 | 108,500        | 172.00 | 14,700   | 196.00 |
|                              | 1994      | 317,000                   | 220,000          | 232.00 | 97,000         | 174.00 | 15,100   | 205.00 |
|                              | 1995      | 251,000                   | 161,300          | 482.00 | 89,700         | 172.00 | 12,000   | 190.00 |
| Pears, All <u>6/</u>         | 1986      | 294,000                   | ---              | ---    | ---            | ---    | ---      | ---    |
|                              | 1987      | 337,000                   | ---              | ---    | ---            | ---    | ---      | ---    |
|                              | 1988      | 302,000                   | ---              | ---    | ---            | ---    | ---      | ---    |
|                              | 1989      | 315,000                   | ---              | ---    | ---            | ---    | ---      | ---    |
|                              | 1990      | 332,000                   | ---              | ---    | ---            | ---    | ---      | ---    |
|                              | 1991      | 317,000                   | ---              | ---    | ---            | ---    | ---      | ---    |
|                              | 1992      | 338,000                   | ---              | ---    | ---            | ---    | ---      | ---    |
|                              | 1993      | 308,000                   | ---              | ---    | ---            | ---    | ---      | ---    |
|                              | 1994      | 363,000                   | ---              | ---    | ---            | ---    | ---      | ---    |
|                              | 1995      | 267,000                   | ---              | ---    | ---            | ---    | ---      | ---    |
| Pears, Bartlett <u>8/</u>    | 1986      | 285,000                   | 70,000           | 332.00 | 215,000        | 187.00 | ---      | ---    |
|                              | 1987      | 325,000                   | 74,500           | 164.00 | 250,500        | 179.00 | ---      | ---    |
|                              | 1988      | 291,000                   | 63,700           | 317.00 | 227,300        | 216.00 | ---      | ---    |
|                              | 1989      | 298,000                   | 64,000           | 299.00 | 234,000        | 256.00 | ---      | ---    |
|                              | 1990      | 314,000                   | 75,000           | 285.00 | 239,000        | 228.00 | ---      | ---    |
|                              | 1991      | 300,000                   | 72,000           | 284.00 | 228,000        | 242.00 | ---      | ---    |
|                              | 1992      | 315,000                   | 63,000           | 238.00 | 252,000        | 238.00 | ---      | ---    |
|                              | 1993      | 288,000                   | 61,000           | 271.00 | 227,000        | 228.00 | ---      | ---    |
|                              | 1994      | 333,000                   | 88,000           | 113.00 | 245,000        | 208.00 | ---      | ---    |
|                              | 1995      | 247,000                   | 60,000           | 254.00 | 187,000        | 199.00 | ---      | ---    |
| Pears, Other <u>6/</u>       | 1986      | 9,000                     | ---              | ---    | ---            | ---    | ---      | ---    |
|                              | 1987      | 12,000                    | ---              | ---    | ---            | ---    | ---      | ---    |
|                              | 1988      | 11,000                    | ---              | ---    | ---            | ---    | ---      | ---    |
|                              | 1989      | 17,000                    | ---              | ---    | ---            | ---    | ---      | ---    |
|                              | 1990      | 18,000                    | ---              | ---    | ---            | ---    | ---      | ---    |
|                              | 1991      | 17,000                    | ---              | ---    | ---            | ---    | ---      | ---    |
|                              | 1992      | 23,000                    | ---              | ---    | ---            | ---    | ---      | ---    |
|                              | 1993      | 20,000                    | ---              | ---    | ---            | ---    | ---      | ---    |
|                              | 1994      | 30,000                    | ---              | ---    | ---            | ---    | ---      | ---    |
|                              | 1995      | 20,000                    | ---              | ---    | ---            | ---    | ---      | ---    |
| Plums <u>6/</u>              | 1986      | 152,000                   | ---              | ---    | ---            | ---    | ---      | ---    |
|                              | 1987      | 245,000                   | ---              | ---    | ---            | ---    | ---      | ---    |
|                              | 1988      | 216,000                   | ---              | ---    | ---            | ---    | ---      | ---    |
|                              | 1989      | 216,000                   | ---              | ---    | ---            | ---    | ---      | ---    |
|                              | 1990      | 223,000                   | ---              | ---    | ---            | ---    | ---      | ---    |
|                              | 1991      | 218,000                   | ---              | ---    | ---            | ---    | ---      | ---    |
|                              | 1992      | 250,000                   | ---              | ---    | ---            | ---    | ---      | ---    |
|                              | 1993      | 185,000                   | ---              | ---    | ---            | ---    | ---      | ---    |
|                              | 1994      | 247,000                   | ---              | ---    | ---            | ---    | ---      | ---    |
|                              | 1995      | 124,000                   | ---              | ---    | ---            | ---    | ---      | ---    |

See Footnotes on Page 31.

**CALIFORNIA NON-CITRUS FRUITS: Utilized Production  
And Average Grower Return Per Ton, By Utilization Category, 1986-95**

| Crop                            | Crop Year | For Processing   |        |          |        |                     |        |             |          |
|---------------------------------|-----------|------------------|--------|----------|--------|---------------------|--------|-------------|----------|
|                                 |           | Juice or Crushed |        | Frozen   |        | Dried (Fresh Basis) |        | Dried Basis |          |
|                                 |           | Quantity         | Price  | Quantity | Price  | Quantity            | Price  | Quantity    | Price    |
|                                 |           | Tons             | \$/Ton | Tons     | \$/Ton | Tons                | \$/Ton | Tons        | \$/Ton   |
| Peaches,<br>Freestone <u>8/</u> | 1986      | ---              | ---    | 56,250   | 165.00 | 16,250              | 96.00  | 1,800       | 864.00   |
|                                 | 1987      | ---              | ---    | 59,000   | 178.00 | 17,500              | 101.00 | 1,950       | 909.00   |
|                                 | 1988      | ---              | ---    | 57,250   | 165.00 | 20,600              | 117.00 | 2,500       | 960.00   |
|                                 | 1989      | ---              | ---    | 63,500   | 167.00 | 14,300              | 110.00 | 1,700       | 924.00   |
|                                 | 1990      | ---              | ---    | 74,850   | 178.00 | 13,550              | 108.00 | 1,500       | 975.00   |
|                                 | 1991      | ---              | ---    | 71,600   | 183.00 | 22,200              | 116.00 | 2,400       | 1,080.00 |
|                                 | 1992      | ---              | ---    | 70,400   | 182.00 | 20,200              | 93.00  | 2,100       | 893.00   |
|                                 | 1993      | ---              | ---    | 78,800   | 185.00 | 15,000              | 82.00  | 1,850       | 713.00   |
|                                 | 1994      | ---              | ---    | 68,400   | 183.00 | 13,500              | 93.00  | 1,450       | 856.00   |
|                                 | 1995      | ---              | ---    | 63,700   | 186.00 | 14,000              | 86.00  | 1,550       | 894.00   |
| Pears,<br>All <u>6/</u>         | 1986      | ---              | ---    | ---      | ---    | ---                 | ---    | ---         | ---      |
|                                 | 1987      | ---              | ---    | ---      | ---    | ---                 | ---    | ---         | ---      |
|                                 | 1988      | ---              | ---    | ---      | ---    | ---                 | ---    | ---         | ---      |
|                                 | 1989      | ---              | ---    | ---      | ---    | ---                 | ---    | ---         | ---      |
|                                 | 1990      | ---              | ---    | ---      | ---    | ---                 | ---    | ---         | ---      |
|                                 | 1991      | ---              | ---    | ---      | ---    | ---                 | ---    | ---         | ---      |
|                                 | 1992      | ---              | ---    | ---      | ---    | ---                 | ---    | ---         | ---      |
|                                 | 1993      | ---              | ---    | ---      | ---    | ---                 | ---    | ---         | ---      |
|                                 | 1994      | ---              | ---    | ---      | ---    | ---                 | ---    | ---         | ---      |
|                                 | 1995      | ---              | ---    | ---      | ---    | ---                 | ---    | ---         | ---      |
| Pears,<br>Bartlett <u>8/</u>    | 1986      | ---              | ---    | ---      | ---    | 9,000               | 105.00 | 1,410       | 672.00   |
|                                 | 1987      | ---              | ---    | ---      | ---    | 8,000               | 106.00 | 1,130       | 753.00   |
|                                 | 1988      | ---              | ---    | ---      | ---    | 7,900               | 147.00 | 1,220       | 956.00   |
|                                 | 1989      | ---              | ---    | ---      | ---    | 6,700               | 146.00 | 1,140       | 861.00   |
|                                 | 1990      | ---              | ---    | ---      | ---    | 7,600               | 126.00 | 1,270       | 756.00   |
|                                 | 1991      | ---              | ---    | ---      | ---    | 9,300               | 150.00 | 1,550       | 900.00   |
|                                 | 1992      | ---              | ---    | ---      | ---    | 9,900               | 171.00 | 1,500       | 1,130.00 |
|                                 | 1993      | ---              | ---    | ---      | ---    | 9,700               | 149.00 | 1,500       | 970.00   |
|                                 | 1994      | ---              | ---    | ---      | ---    | 8,000               | 152.00 | 1,300       | 942.00   |
|                                 | 1995      | ---              | ---    | ---      | ---    | 4,900               | 150.00 | 800         | 919.00   |
| Pears,<br>Other <u>6/</u>       | 1986      | ---              | ---    | ---      | ---    | ---                 | ---    | ---         | ---      |
|                                 | 1987      | ---              | ---    | ---      | ---    | ---                 | ---    | ---         | ---      |
|                                 | 1988      | ---              | ---    | ---      | ---    | ---                 | ---    | ---         | ---      |
|                                 | 1989      | ---              | ---    | ---      | ---    | ---                 | ---    | ---         | ---      |
|                                 | 1990      | ---              | ---    | ---      | ---    | ---                 | ---    | ---         | ---      |
|                                 | 1991      | ---              | ---    | ---      | ---    | ---                 | ---    | ---         | ---      |
|                                 | 1992      | ---              | ---    | ---      | ---    | ---                 | ---    | ---         | ---      |
|                                 | 1993      | ---              | ---    | ---      | ---    | ---                 | ---    | ---         | ---      |
|                                 | 1994      | ---              | ---    | ---      | ---    | ---                 | ---    | ---         | ---      |
|                                 | 1995      | ---              | ---    | ---      | ---    | ---                 | ---    | ---         | ---      |
| Plums <u>6/</u>                 | 1986      | ---              | ---    | ---      | ---    | ---                 | ---    | ---         | ---      |
|                                 | 1987      | ---              | ---    | ---      | ---    | ---                 | ---    | ---         | ---      |
|                                 | 1988      | ---              | ---    | ---      | ---    | ---                 | ---    | ---         | ---      |
|                                 | 1989      | ---              | ---    | ---      | ---    | ---                 | ---    | ---         | ---      |
|                                 | 1990      | ---              | ---    | ---      | ---    | ---                 | ---    | ---         | ---      |
|                                 | 1991      | ---              | ---    | ---      | ---    | ---                 | ---    | ---         | ---      |
|                                 | 1992      | ---              | ---    | ---      | ---    | ---                 | ---    | ---         | ---      |
|                                 | 1993      | ---              | ---    | ---      | ---    | ---                 | ---    | ---         | ---      |
|                                 | 1994      | ---              | ---    | ---      | ---    | ---                 | ---    | ---         | ---      |
|                                 | 1995      | ---              | ---    | ---      | ---    | ---                 | ---    | ---         | ---      |

See Footnotes on Page 31.



**CALIFORNIA NON-CITRUS FRUITS: Utilized Production  
And Average Grower Return Per Ton, By Utilization Category, 1986-95**

| Crop                   | Crop Year | Total Utilized Production | For Fresh Market |        | For Processing |          |          |        |
|------------------------|-----------|---------------------------|------------------|--------|----------------|----------|----------|--------|
|                        |           |                           |                  |        | Total          |          | Canned   |        |
|                        |           |                           | Quantity         | Price  | Quantity       | Price    | Quantity | Price  |
|                        |           | Short Tons                | Tons             | \$/Ton | Tons           | \$/Ton   | Tons     | \$/Ton |
| Pomegranates<br>9/     | 1986      | 19,400                    | ---              | ---    | ---            | ---      | ---      | ---    |
|                        | 1987      | 16,500                    | ---              | ---    | ---            | ---      | ---      | ---    |
|                        | 1988      | 18,000                    | ---              | ---    | ---            | ---      | ---      | ---    |
|                        | 1989      | 18,000                    | ---              | ---    | ---            | ---      | ---      | ---    |
|                        | 1990      | ---                       | ---              | ---    | ---            | ---      | ---      | ---    |
|                        | 1991      | ---                       | ---              | ---    | ---            | ---      | ---      | ---    |
|                        | 1992      | ---                       | ---              | ---    | ---            | ---      | ---      | ---    |
|                        | 1993      | ---                       | ---              | ---    | ---            | ---      | ---      | ---    |
|                        | 1994      | ---                       | ---              | ---    | ---            | ---      | ---      | ---    |
|                        | 1995      | ---                       | ---              | ---    | ---            | ---      | ---      | ---    |
| Prunes,<br>Dried Basis | 1986      | 99,000                    | ---              | ---    | 99,000         | 819.00   | ---      | ---    |
|                        | 1987      | 229,000                   | ---              | ---    | 229,000        | 734.00   | ---      | ---    |
|                        | 1988      | 151,000                   | ---              | ---    | 151,000        | 782.00   | ---      | ---    |
|                        | 1989      | 226,000                   | ---              | ---    | 226,000        | 779.00   | ---      | ---    |
|                        | 1990      | 147,000                   | ---              | ---    | 147,000        | 873.00   | ---      | ---    |
|                        | 1991      | 187,000                   | ---              | ---    | 187,000        | 940.00   | ---      | ---    |
|                        | 1992      | 184,000                   | ---              | ---    | 184,000        | 1,030.00 | ---      | ---    |
|                        | 1993      | 121,000                   | ---              | ---    | 121,000        | 1,120.00 | ---      | ---    |
|                        | 1994      | 193,000                   | ---              | ---    | 193,000        | 1,090.00 | ---      | ---    |
|                        | 1995      | 181,000                   | ---              | ---    | 181,000        | 1,040.00 | ---      | ---    |

See Footnotes on Page 31.

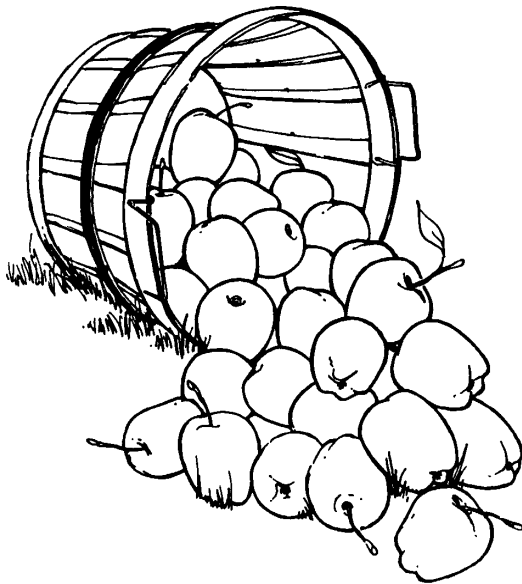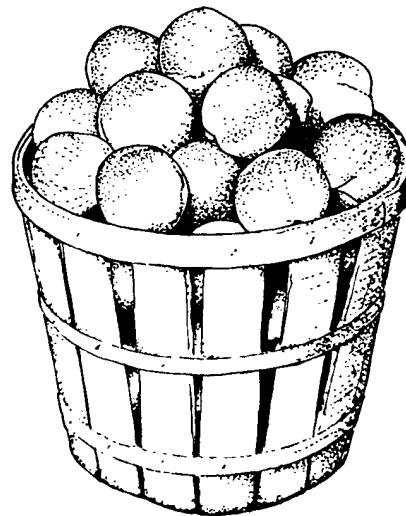

**CALIFORNIA NON-CITRUS FRUITS: Utilized Production  
And Average Grower Return Per Ton, By Utilization Category, 1986-95**

| Crop                      | Crop Year | For Processing   |        |          |        |                     |        |             |          |
|---------------------------|-----------|------------------|--------|----------|--------|---------------------|--------|-------------|----------|
|                           |           | Juice or Crushed |        | Frozen   |        | Dried (Fresh Basis) |        | Dried Basis |          |
|                           |           | Quantity         | Price  | Quantity | Price  | Quantity            | Price  | Quantity    | Price    |
|                           |           | Tons             | \$/Ton | Tons     | \$/Ton | Tons                | \$/Ton | Tons        | \$/Ton   |
| Pomegranates<br><u>9/</u> | 1986      | ---              | ---    | ---      | ---    | ---                 | ---    | ---         | ---      |
|                           | 1987      | ---              | ---    | ---      | ---    | ---                 | ---    | ---         | ---      |
|                           | 1988      | ---              | ---    | ---      | ---    | ---                 | ---    | ---         | ---      |
|                           | 1989      | ---              | ---    | ---      | ---    | ---                 | ---    | ---         | ---      |
|                           | 1990      | ---              | ---    | ---      | ---    | ---                 | ---    | ---         | ---      |
|                           | 1991      | ---              | ---    | ---      | ---    | ---                 | ---    | ---         | ---      |
|                           | 1992      | ---              | ---    | ---      | ---    | ---                 | ---    | ---         | ---      |
|                           | 1993      | ---              | ---    | ---      | ---    | ---                 | ---    | ---         | ---      |
|                           | 1994      | ---              | ---    | ---      | ---    | ---                 | ---    | ---         | ---      |
|                           | 1995      | ---              | ---    | ---      | ---    | ---                 | ---    | ---         | ---      |
| Prunes,<br>Dried Basis    | 1986      | ---              | ---    | ---      | ---    | 291,100             | 279.00 | 99,000      | 819.00   |
|                           | 1987      | ---              | ---    | ---      | ---    | 682,400             | 246.00 | 229,000     | 734.00   |
|                           | 1988      | ---              | ---    | ---      | ---    | 469,600             | 251.00 | 151,000     | 782.00   |
|                           | 1989      | ---              | ---    | ---      | ---    | 754,800             | 233.00 | 226,000     | 779.00   |
|                           | 1990      | ---              | ---    | ---      | ---    | 463,100             | 266.00 | 147,000     | 873.00   |
|                           | 1991      | ---              | ---    | ---      | ---    | 589,000             | 298.00 | 187,000     | 940.00   |
|                           | 1992      | ---              | ---    | ---      | ---    | 534,000             | 355.00 | 184,000     | 1,030.00 |
|                           | 1993      | ---              | ---    | ---      | ---    | 375,000             | 374.00 | 121,000     | 1,120.00 |
|                           | 1994      | ---              | ---    | ---      | ---    | 594,000             | 354.00 | 193,000     | 1,090.00 |
|                           | 1995      | ---              | ---    | ---      | ---    | 597,300             | 320.00 | 181,000     | 1,040.00 |

1/ Dried and frozen fruit included in total processed to avoid disclosure of individual operations.

2/ Processed fruit included in fresh market total to avoid disclosure of individual operations.

3/ Total processed includes canned, crushed, frozen, and brined.

4/ For 1986-95, prices for processing and fresh totals were not published to avoid disclosure of individual operations. Small quantities processed included in fresh to avoid disclosure of individual operations.

5/ Includes substandard raisins diverted to other uses.

6/ Processed and fresh fruit not published to avoid disclosure of individual operations but included in total utilized.

7/ Limited and undersized combined prior to 1988.

8/ Processed mostly canned, but includes other small quantities not published separately to avoid disclosure of individual operations.

9/ Pomegranates reported as miscellaneous after 1989 crop.

**CALIFORNIA CITRUS FRUITS: Acreage, Production, Price And Value, 1985-95**

| Crop                                                                            | Crop Year | Bearing | Non-Bearing | Yield Per Acre | Total Production | Price 1/ | Total Value |
|---------------------------------------------------------------------------------|-----------|---------|-------------|----------------|------------------|----------|-------------|
|                                                                                 |           | Acres   |             | Cartons        | 1,000 Cartons    | Dollars  | \$1,000     |
| Grapefruit, All 2/                                                              | 85-86     | 20,900  | 1,300       | 775            | 16,200           | 3.67     | 59,280      |
|                                                                                 | 86-87     | 20,800  | 1,500       | 894            | 18,600           | 3.03     | 56,251      |
|                                                                                 | 87-88     | 20,700  | 1,100       | 879            | 18,200           | 3.12     | 56,600      |
|                                                                                 | 88-89     | 19,900  | 1,800       | 804            | 16,000           | 3.11     | 49,459      |
|                                                                                 | 89-90     | 19,200  | 2,100       | 979            | 18,800           | 4.01     | 75,457      |
|                                                                                 | 90-91     | 18,300  | 2,400       | 874            | 16,000           | 3.20     | 51,128      |
|                                                                                 | 91-92     | 18,500  | 2,400       | 1,082          | 20,000           | 3.06     | 61,120      |
|                                                                                 | 92-93     | 17,800  | 2,600       | 1,034          | 18,400           | 2.46     | 45,089      |
|                                                                                 | 93-94     | 18,000  | N/A         | 1,034          | 18,600           | 2.72     | 50,579      |
|                                                                                 | 94-95     | 18,400  | N/A         | 1,010          | 18,600           | 2.84     | 52,827      |
| Grapefruit, Desert Valley 3/<br><br>(Net weight per carton:<br>33.5 pounds)     | 85-86     | 9,400   | 500         | 766            | 7,200            | 3.41     | 24,504      |
|                                                                                 | 86-87     | 9,200   | 600         | 935            | 8,600            | 2.74     | 23,578      |
|                                                                                 | 87-88     | 9,000   | 600         | 933            | 8,400            | 2.54     | 21,304      |
|                                                                                 | 88-89     | 8,200   | 900         | 854            | 7,000            | 2.33     | 16,314      |
|                                                                                 | 89-90     | 7,600   | 1,100       | 921            | 7,000            | 4.55     | 31,799      |
|                                                                                 | 90-91     | 7,200   | 1,200       | 972            | 7,000            | 3.13     | 21,905      |
|                                                                                 | 91-92     | 7,300   | 1,300       | 958            | 7,000            | 3.09     | 21,613      |
|                                                                                 | 92-93     | 7,300   | 1,600       | 958            | 7,000            | 2.09     | 14,639      |
|                                                                                 | 93-94     | 7,700   | N/A         | 884            | 6,800            | 1.85     | 12,541      |
|                                                                                 | 94-95     | 8,000   | N/A         | 826            | 6,600            | 2.19     | 14,423      |
| Grapefruit, Other Areas<br><br>(Net weight per carton:<br>33.5 pounds)          | 85-86     | 11,500  | 800         | 783            | 9,000            | 3.87     | 34,776      |
|                                                                                 | 86-87     | 11,600  | 900         | 862            | 10,000           | 3.27     | 32,673      |
|                                                                                 | 87-88     | 11,700  | 500         | 838            | 9,800            | 3.60     | 35,296      |
|                                                                                 | 88-89     | 11,700  | 900         | 769            | 9,000            | 3.69     | 33,145      |
|                                                                                 | 89-90     | 11,600  | 1,000       | 1,017          | 11,800           | 3.70     | 43,658      |
|                                                                                 | 90-91     | 11,100  | 1,200       | 810            | 9,000            | 3.25     | 29,223      |
|                                                                                 | 91-92     | 11,200  | 1,100       | 1,160          | 13,000           | 3.04     | 39,507      |
|                                                                                 | 92-93     | 10,500  | 1,000       | 1,086          | 11,400           | 2.67     | 30,450      |
|                                                                                 | 93-94     | 10,300  | N/A         | 1,146          | 11,800           | 3.23     | 38,038      |
|                                                                                 | 94-95     | 10,400  | N/A         | 1,154          | 12,000           | 3.20     | 38,404      |
| Oranges, All<br><br>(All varieties --<br>net weight per carton:<br>37.5 pounds) | 85-86     | 174,600 | 7,600       | 617            | 107,800          | 3.39     | 364,952     |
|                                                                                 | 86-87     | 172,900 | 12,700      | 670            | 115,800          | 3.75     | 434,124     |
|                                                                                 | 87-88     | 172,600 | 13,900      | 684            | 118,000          | 3.89     | 458,180     |
|                                                                                 | 88-89     | 177,600 | 13,800      | 663            | 117,800          | 3.93     | 462,264     |
|                                                                                 | 89-90     | 175,100 | 15,000      | 816            | 142,800          | 3.89     | 555,055     |
|                                                                                 | 90-91     | 178,400 | 15,500      | 286            | 51,200           | 7.27     | 372,284     |
|                                                                                 | 91-92     | 181,800 | 16,200      | 742            | 134,800          | 3.22     | 433,994     |
|                                                                                 | 92-93     | 184,000 | 16,600      | 726            | 133,600          | 3.54     | 472,010     |
|                                                                                 | 93-94     | 185,000 | N/A         | 688            | 127,200          | 3.64     | 462,567     |
|                                                                                 | 94-95     | 191,000 | N/A         | 638            | 122,000          | 3.76     | 458,130     |

See Footnotes on Page 33.

**CALIFORNIA CITRUS FRUITS: Acreage, Production, Price And Value, 1985-95**

| Crop                                                                                                                                   | Crop Year | Bearing | Non-Bearing | Yield Per Acre | Total Production | Price <sup>1/</sup> | Total Value |
|----------------------------------------------------------------------------------------------------------------------------------------|-----------|---------|-------------|----------------|------------------|---------------------|-------------|
|                                                                                                                                        |           | Acres   |             | Cartons        | 1,000 Cartons    | Dollars             | \$1,000     |
| Oranges, Navel & Misc.                                                                                                                 | 85-86     | 107,000 | 4,200       | 617            | 66,000           | 3.58                | 235,980     |
|                                                                                                                                        | 86-87     | 106,000 | 7,400       | 651            | 69,000           | 3.52                | 242,840     |
|                                                                                                                                        | 87-88     | 106,000 | 8,100       | 594            | 63,000           | 3.91                | 246,462     |
|                                                                                                                                        | 88-89     | 108,000 | 9,200       | 630            | 68,000           | 3.79                | 257,328     |
|                                                                                                                                        | 89-90     | 106,000 | 10,200      | 836            | 88,600           | 4.02                | 355,661     |
|                                                                                                                                        | 90-91     | 109,000 | 10,000      | 290            | 31,600           | 5.04                | 159,330     |
|                                                                                                                                        | 91-92     | 112,000 | 9,800       | 626            | 70,200           | 4.36                | 305,811     |
|                                                                                                                                        | 92-93     | 114,000 | 10,600      | 768            | 87,600           | 3.16                | 277,008     |
|                                                                                                                                        | 93-94     | 114,000 | N/A         | 642            | 73,200           | 3.99                | 291,807     |
|                                                                                                                                        | 94-95     | 118,000 | N/A         | 594            | 70,000           | 3.91                | 273,750     |
| Oranges, Valencia                                                                                                                      | 85-86     | 67,600  | 3,400       | 618            | 41,800           | 3.09                | 128,972     |
|                                                                                                                                        | 86-87     | 66,900  | 5,300       | 700            | 46,800           | 4.09                | 191,284     |
|                                                                                                                                        | 87-88     | 66,600  | 5,800       | 826            | 55,000           | 3.85                | 211,718     |
|                                                                                                                                        | 88-89     | 69,600  | 4,600       | 716            | 49,800           | 4.12                | 204,936     |
|                                                                                                                                        | 89-90     | 69,100  | 4,800       | 784            | 54,200           | 3.68                | 199,394     |
|                                                                                                                                        | 90-91     | 69,400  | 5,500       | 282            | 19,600           | 10.87               | 212,954     |
|                                                                                                                                        | 91-92     | 69,800  | 6,400       | 926            | 64,600           | 1.99                | 128,183     |
|                                                                                                                                        | 92-93     | 70,000  | 6,000       | 658            | 46,000           | 4.24                | 195,002     |
|                                                                                                                                        | 93-94     | 71,000  | N/A         | 760            | 54,000           | 3.16                | 170,760     |
|                                                                                                                                        | 94-95     | 73,000  | N/A         | 712            | 52,000           | 3.55                | 184,380     |
| Lemons<br><br>(Net weight per carton:<br>38 pounds)                                                                                    | 85-86     | 48,800  | 1,500       | 619            | 30,200           | 5.65                | 170,426     |
|                                                                                                                                        | 86-87     | 48,400  | 1,100       | 888            | 43,000           | 3.56                | 152,890     |
|                                                                                                                                        | 87-88     | 49,000  | 700         | 694            | 34,000           | 5.02                | 170,628     |
|                                                                                                                                        | 88-89     | 48,400  | 800         | 669            | 32,400           | 6.19                | 200,524     |
|                                                                                                                                        | 89-90     | 47,800  | 1,400       | 661            | 31,600           | 7.60                | 239,979     |
|                                                                                                                                        | 90-91     | 46,700  | 1,600       | 634            | 29,600           | 8.19                | 242,269     |
|                                                                                                                                        | 91-92     | 46,400  | 1,900       | 650            | 30,200           | 6.32                | 190,894     |
|                                                                                                                                        | 92-93     | 46,400  | 2,100       | 880            | 40,800           | 4.97                | 202,827     |
|                                                                                                                                        | 93-94     | 45,500  | N/A         | 910            | 41,400           | 5.00                | 207,020     |
|                                                                                                                                        | 94-95     | 45,700  | N/A         | 898            | 41,000           | 5.57                | 228,308     |
| Tangerines<br><br>(Including Mandarins &<br>Mandarin Hybrids,<br>Tangelos and Tangors.)<br><br>(Net weight per carton:<br>37.5 pounds) | 85-86     | 8,500   | 600         | 424            | 3,600            | 6.10                | 21,940      |
|                                                                                                                                        | 86-87     | 8,600   | 600         | 519            | 4,460            | 5.76                | 25,697      |
|                                                                                                                                        | 87-88     | 8,400   | 900         | 498            | 4,180            | 7.73                | 32,297      |
|                                                                                                                                        | 88-89     | 8,000   | 1,200       | 510            | 4,080            | 7.04                | 28,733      |
|                                                                                                                                        | 89-90     | 7,300   | 1,500       | 452            | 3,300            | 9.45                | 31,193      |
|                                                                                                                                        | 90-91     | 7,600   | 1,400       | 356            | 2,700            | 9.09                | 24,528      |
|                                                                                                                                        | 91-92     | 7,800   | 1,400       | 626            | 4,880            | 7.25                | 35,357      |
|                                                                                                                                        | 92-93     | 7,700   | 1,300       | 546            | 4,200            | 6.00                | 25,186      |
|                                                                                                                                        | 93-94     | 8,000   | N/A         | 576            | 4,600            | 5.58                | 25,651      |
|                                                                                                                                        | 94-95     | 8,500   | N/A         | 518            | 4,400            | 6.88                | 30,261      |

<sup>1/</sup> Equivalent packinghouse door returns.

<sup>2/</sup> Season average prices for all grapefruit are derived by weighting the season average prices for each area by their carton weights.

<sup>3/</sup> Prior to 1993-94 net weight per carton was 32 pounds.

**CALIFORNIA NUTS: Acreage, Production, Price And Value, 1986-95**

| Crop                                         | Crop Year | Bearing | Non-Bearing | Yield Per Acre | Production          |                |         | Price  | Total Value |
|----------------------------------------------|-----------|---------|-------------|----------------|---------------------|----------------|---------|--------|-------------|
|                                              |           |         |             |                | Marketable In-Shell | Shelling Stock | Total   |        |             |
|                                              |           | Acres   |             | Pounds         | 1,000 Pounds        |                |         | \$/Lb. | \$1,000     |
| Almonds <u>1/ 2/</u><br><br>(Shelled Basis)  | 1986      | 416,000 | 17,200      | 601            | ---                 | ---            | 250,000 | 1.92   | 461,568     |
|                                              | 1987      | 417,000 | 17,500      | 1,580          | ---                 | ---            | 660,000 | 1.00   | 648,000     |
|                                              | 1988      | 419,000 | 16,700      | 1,410          | ---                 | ---            | 590,000 | 1.05   | 600,075     |
|                                              | 1989      | 411,000 | 21,700      | 1,190          | ---                 | ---            | 490,000 | 1.02   | 480,930     |
|                                              | 1990      | 411,000 | 32,400      | 1,610          | ---                 | ---            | 660,000 | 0.93   | 597,990     |
|                                              | 1991      | 405,000 | 33,000      | 1,210          | ---                 | ---            | 490,000 | 1.19   | 564,179     |
|                                              | 1992      | 401,000 | 33,600      | 1,370          | ---                 | ---            | 548,000 | 1.30   | 691,340     |
|                                              | 1993      | 402,000 | 26,600      | 1,220          | ---                 | ---            | 490,000 | 1.94   | 930,618     |
|                                              | 1994      | 409,000 | 36,900      | 1,800          | ---                 | ---            | 735,000 | 1.34   | 965,202     |
|                                              | 1995      | 400,000 | 56,900      | 925            | ---                 | ---            | 370,000 | 2.39   | 857,771     |
| Pecans <u>3/</u><br><br>(In-Shell Basis)     | 1986      | 1,400   | 1,300       | ---            | ---                 | ---            | ---     | ---    |             |
|                                              | 1987      | 1,800   | 1,200       | ---            | ---                 | ---            | ---     | ---    |             |
|                                              | 1988      | 2,500   | 500         | 880            | ---                 | ---            | 2,200   | 0.70   | 1,540       |
|                                              | 1989      | 2,500   | 700         | 800            | ---                 | ---            | 2,000   | 0.90   | 1,804       |
|                                              | 1990      | 2,600   | 600         | 1,080          | ---                 | ---            | 2,800   | 1.25   | 3,500       |
|                                              | 1991      | 2,500   | 600         | 920            | ---                 | ---            | 2,300   | 1.32   | 3,036       |
|                                              | 1992      | 2,600   | 600         | 1,000          | ---                 | ---            | 2,600   | 1.60   | 4,160       |
|                                              | 1993      | 2,500   | 500         | 1,200          | ---                 | ---            | 3,000   | 0.96   | 2,880       |
|                                              | 1994      | 2,600   | N/A         | 577            | ---                 | ---            | 1,500   | 1.16   | 1,740       |
|                                              | 1995      | 2,600   | N/A         | 1,120          | ---                 | ---            | 2,900   | 1.28   | 3,712       |
| Pistachios <u>2/</u><br><br>(In-Shell Basis) | 1986      | 34,200  | 20,400      | 2,190          | 57,500              | 17,400         | 74,900  | 1.12   | 83,888      |
|                                              | 1987      | 41,000  | 16,400      | 807            | 27,200              | 5,900          | 33,100  | 1.37   | 45,347      |
|                                              | 1988      | 47,200  | 10,300      | 1,990          | 76,100              | 17,900         | 94,000  | 1.22   | 114,680     |
|                                              | 1989      | 50,900  | 12,000      | 766            | 33,000              | 6,000          | 39,000  | 1.63   | 63,570      |
|                                              | 1990      | 53,700  | 12,300      | 2,230          | 94,600              | 25,400         | 120,000 | 1.02   | 122,400     |
|                                              | 1991      | 55,700  | 13,300      | 1,380          | 59,000              | 18,000         | 77,000  | 1.25   | 96,250      |
|                                              | 1992      | 56,500  | 13,900      | 2,600          | 114,500             | 32,500         | 147,000 | 1.03   | 151,410     |
|                                              | 1993      | 57,000  | 15,700      | 2,670          | 113,000             | 39,000         | 152,000 | 1.07   | 162,640     |
|                                              | 1994      | 57,500  | 16,600      | 2,240          | 94,600              | 34,400         | 129,000 | 0.92   | 118,809     |
|                                              | 1995      | 60,300  | 13,400      | 2,450          | 107,500             | 40,500         | 148,000 | 0.96   | 141,636     |
| Walnuts <u>2/</u><br><br>(In-Shell Basis)    |           | Acres   |             | Tons           | Tons                |                |         | \$/Ton | \$1,000     |
|                                              | 1986      | 180,000 | 20,800      | 1.00           | ---                 | ---            | 180,000 | 1,080  | 194,400     |
|                                              | 1987      | 176,000 | 25,300      | 1.40           | ---                 | ---            | 247,000 | 984    | 243,048     |
|                                              | 1988      | 177,000 | 22,900      | 1.18           | ---                 | ---            | 209,000 | 922    | 192,698     |
|                                              | 1989      | 179,000 | 20,800      | 1.28           | ---                 | ---            | 229,000 | 1,070  | 245,030     |
|                                              | 1990      | 181,000 | 17,700      | 1.25           | ---                 | ---            | 227,000 | 1,040  | 236,080     |
|                                              | 1991      | 181,000 | 16,600      | 1.43           | ---                 | ---            | 259,000 | 1,060  | 274,540     |
|                                              | 1992      | 178,000 | 17,200      | 1.14           | ---                 | ---            | 203,000 | 1,410  | 286,230     |
|                                              | 1993      | 176,000 | 20,000      | 1.48           | ---                 | ---            | 260,000 | 1,390  | 361,400     |
|                                              | 1994      | 171,000 | 19,800      | 1.36           | ---                 | ---            | 232,000 | 1,000  | 232,000     |
|                                              | 1995      | 169,000 | 26,600      | 1.38           | ---                 | ---            | 234,000 | 1,340  | 313,560     |

1/ Price and value are based on the edible portion of the crop only. Included in production are inedible quantities of no value as follows: 1986 -- 9.8 million pounds, 1987 -- 12.0 million pounds, 1988 -- 18.5 million pounds, 1989 -- 18.5 million pounds, 1990 -- 17.0 million pounds, 1991 -- 15.9 million pounds, 1992 -- 16.2 million pounds, 1993 -- 10.3 million pounds, 1994 -- 14.7 million pounds, 1995 -- 11.1 million pounds.

2/ Data for 1995 acreage by county, variety, and year of planting available upon request.

3/ Pecan production data begins with the 1988 crop.

**CALIFORNIA BERRIES: Acreage, Production, Price And Value, 1986-95**

| Crop                       | Crop Year | Harvested Acreage | Average Yield | Production | Price Per Cwt. 1/ | Total Value |
|----------------------------|-----------|-------------------|---------------|------------|-------------------|-------------|
|                            |           | Acres             | Cwt.          | 1,000 Cwt. | Dollars           | \$1,000     |
| Boysenberries              | 1986      | 510               | 65            | 33         | 72.20             | 2,383       |
|                            | 1987      | 450               | 73            | 33         | 71.60             | 2,364       |
|                            | 1988      | 400               | 53            | 21         | 181.60            | 3,814       |
|                            | 1989      | 460               | 93            | 43         | 121.70            | 5,232       |
|                            | 1990      | 450               | 80            | 36         | 88.00             | 3,168       |
|                            | 1991      | N/A               | N/A           | N/A        | N/A               | N/A         |
|                            | 1992      | 200               | 85            | 17         | 91.10             | 1,548       |
|                            | 1993      | 250               | 90            | 23         | 88.00             | 1,980       |
|                            | 1994      | 250               | 80            | 20         | 75.50             | 1,510       |
|                            | 1995      | 270               | 67            | 18         | 95.00             | 1,710       |
| Olallieberries             | 1986      | 200               | 90            | 18         | 79.50             | 1,431       |
|                            | 1987      | 150               | 107           | 16         | 79.70             | 1,275       |
|                            | 1988      | 200               | 110           | 22         | 93.40             | 2,054       |
|                            | 1989      | 200               | 80            | 16         | 78.50             | 1,256       |
|                            | 1990      | 200               | 110           | 22         | 80.00             | 1,760       |
|                            | 1991      | N/A               | N/A           | N/A        | N/A               | N/A         |
|                            | 1992      | N/A               | N/A           | N/A        | N/A               | N/A         |
|                            | 1993      | N/A               | N/A           | N/A        | N/A               | N/A         |
|                            | 1994      | N/A               | N/A           | N/A        | N/A               | N/A         |
|                            | 1995      | N/A               | N/A           | N/A        | N/A               | N/A         |
| Raspberries                | 1986      | 600               | 100           | 60         | 177.60            | 10,653      |
|                            | 1987      | 1,000             | 82            | 82         | 154.60            | 12,677      |
|                            | 1988      | 1,500             | 111           | 167        | 158.10            | 26,407      |
|                            | 1989      | 1,400             | 104           | 145        | 165.40            | 23,978      |
|                            | 1990      | 1,700             | 104           | 177        | 165.00            | 29,228      |
|                            | 1991      | N/A               | N/A           | N/A        | N/A               | N/A         |
|                            | 1992      | 1,600             | 165           | 264        | 183.00            | 48,276      |
|                            | 1993      | 1,850             | 142           | 263        | 148.00            | 39,000      |
|                            | 1994      | 1,900             | 110           | 210        | 143.00            | 30,000      |
|                            | 1995      | 1,900             | 80            | 153        | 152.00            | 23,325      |
| Strawberries, All          | 1986      | 15,600            | 505           | 7,878      | 48.90             | 385,245     |
|                            | 1987      | 17,500            | 470           | 8,225      | 49.50             | 407,251     |
|                            | 1988      | 19,200            | 450           | 8,640      | 45.10             | 389,830     |
|                            | 1989      | 20,400            | 425           | 8,670      | 42.90             | 372,201     |
|                            | 1990      | 21,000            | 470           | 9,870      | 43.30             | 417,728     |
|                            | 1991      | 21,100            | 520           | 10,972     | 42.40             | 465,515     |
|                            | 1992      | 24,000            | 430           | 10,320     | 49.70             | 513,028     |
|                            | 1993      | 25,100            | 455           | 11,421     | 40.10             | 457,855     |
|                            | 1994      | 23,300            | 570           | 13,281     | 48.80             | 647,575     |
|                            | 1995      | 23,600            | 505           | 11,918     | 46.30             | 551,698     |
| Strawberries, Fresh Market | 1986      | ---               | ---           | 5,804      | 58.30             | 338,373     |
|                            | 1987      | ---               | ---           | 5,995      | 58.00             | 347,710     |
|                            | 1988      | ---               | ---           | 6,590      | 52.00             | 342,680     |
|                            | 1989      | ---               | ---           | 6,570      | 49.30             | 323,901     |
|                            | 1990      | ---               | ---           | 6,705      | 52.00             | 338,603     |
|                            | 1991      | ---               | ---           | 7,652      | 50.90             | 389,487     |
|                            | 1992      | ---               | ---           | 7,630      | 59.20             | 451,696     |
|                            | 1993      | ---               | ---           | 7,736      | 46.80             | 362,045     |
|                            | 1994      | ---               | ---           | 9,016      | 59.10             | 532,846     |
|                            | 1995      | ---               | ---           | 8,001      | 57.40             | 459,257     |

See Footnote on Page 36.

**CALIFORNIA BERRIES: Acreage, Production, Price And Value, 1986-95**

| Crop                     | Crop Year | Harvested Acreage | Average Yield | Production | Price Per Cwt. <sup>1/</sup> | Total Value |
|--------------------------|-----------|-------------------|---------------|------------|------------------------------|-------------|
|                          |           | Acres             | Cwt.          | 1,000 Cwt. | Dollars                      | \$1,000     |
| Strawberries, Processing | 1986      | ---               | ---           | 2,074      | 22.60                        | 46,872      |
|                          | 1987      | ---               | ---           | 2,230      | 26.70                        | 59,541      |
|                          | 1988      | ---               | ---           | 2,050      | 23.00                        | 47,150      |
|                          | 1989      | ---               | ---           | 2,100      | 23.00                        | 48,300      |
|                          | 1990      | ---               | ---           | 3,165      | 25.00                        | 79,125      |
|                          | 1991      | ---               | ---           | 3,320      | 22.90                        | 76,028      |
|                          | 1992      | ---               | ---           | 2,690      | 22.80                        | 61,332      |
|                          | 1993      | ---               | ---           | 3,685      | 26.00                        | 95,810      |
|                          | 1994      | ---               | ---           | 4,265      | 26.90                        | 114,729     |
|                          | 1995      | ---               | ---           | 3,917      | 23.60                        | 92,441      |

<sup>1/</sup> The processed price is based on equivalent returns at the processing plant door. The fresh market price is on a packed and loaded basis, F.O. B. shipping point.

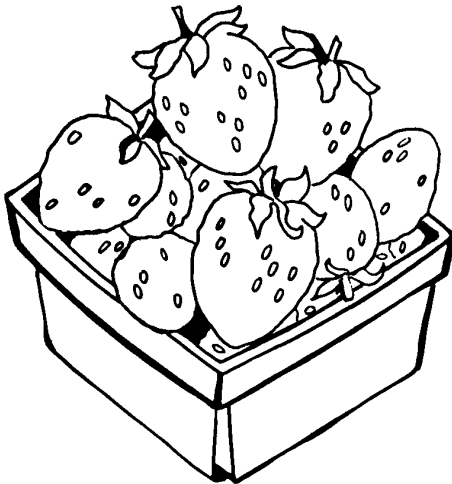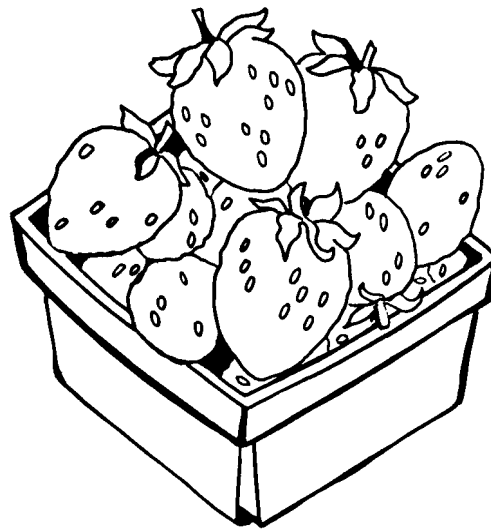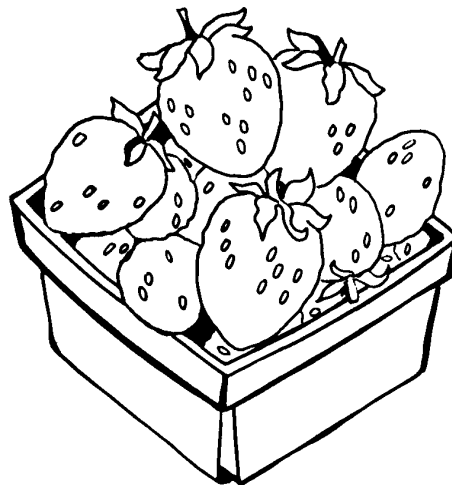

**CALIFORNIA CITRUS FRUITS: Sales By Utilization And Price Per Carton, 1985-95**

| Crop                                                                               | Crop Year | All Sales     |          | Fresh Market  |          | Processing    |          |
|------------------------------------------------------------------------------------|-----------|---------------|----------|---------------|----------|---------------|----------|
|                                                                                    |           | Quantity      | Price 1/ | Quantity      | Price 1/ | Quantity      | Price 1/ |
|                                                                                    |           | 1,000 Cartons | \$/Ctn.  | 1,000 Cartons | \$/Ctn.  | 1,000 Cartons | \$/Ctn.  |
| Grapefruit, All <u>2/</u>                                                          | 85-86     | 16,200        | 3.67     | 11,400        | 5.07     | 4,800         | 0.33     |
|                                                                                    | 86-87     | 18,600        | 3.03     | 11,700        | 4.58     | 6,900         | 0.41     |
|                                                                                    | 87-88     | 18,200        | 3.12     | 12,000        | 4.45     | 6,200         | 0.54     |
|                                                                                    | 88-89     | 16,000        | 3.11     | 11,000        | 4.50     | 5,000         | 0.06     |
|                                                                                    | 89-90     | 18,800        | 4.01     | 12,000        | 6.11     | 6,800         | 0.30     |
|                                                                                    | 90-91     | 16,000        | 3.20     | 10,400        | 4.97     | 5,600         | -0.08    |
|                                                                                    | 91-92     | 20,000        | 3.06     | 12,800        | 4.56     | 7,200         | 0.40     |
|                                                                                    | 92-93     | 18,400        | 2.46     | 11,400        | 4.08     | 7,000         | -0.17    |
|                                                                                    | 93-94     | 18,600        | 2.72     | 12,160        | 4.16     | 6,440         | 0.00     |
|                                                                                    | 94-95     | 18,600        | 2.84     | 11,820        | 4.53     | 6,780         | -0.10    |
| Grapefruit, Desert Valley <u>3/</u><br><br>(Net weight per carton:<br>33.5 pounds) | 85-86     | 7,200         | 3.41     | 4,800         | 4.93     | 2,400         | 0.35     |
|                                                                                    | 86-87     | 8,600         | 2.74     | 5,200         | 4.24     | 3,400         | 0.45     |
|                                                                                    | 87-88     | 8,400         | 2.54     | 5,200         | 3.74     | 3,200         | 0.58     |
|                                                                                    | 88-89     | 7,000         | 2.33     | 5,100         | 3.21     | 1,900         | -0.03    |
|                                                                                    | 89-90     | 7,000         | 4.55     | 4,800         | 6.54     | 2,200         | 0.19     |
|                                                                                    | 90-91     | 7,000         | 3.13     | 5,000         | 4.42     | 2,000         | -0.09    |
|                                                                                    | 91-92     | 7,000         | 3.09     | 5,200         | 4.08     | 1,800         | 0.24     |
|                                                                                    | 92-93     | 7,000         | 2.09     | 4,800         | 3.13     | 2,200         | -0.18    |
|                                                                                    | 93-94     | 6,800         | 1.85     | 4,560         | 2.76     | 2,240         | -0.01    |
|                                                                                    | 94-95     | 6,600         | 2.19     | 4,420         | 3.31     | 2,180         | -0.09    |
| Grapefruit, Other Areas<br><br>(Net weight per carton:<br>33.5 pounds)             | 85-86     | 9,000         | 3.87     | 6,600         | 5.16     | 2,400         | 0.30     |
|                                                                                    | 86-87     | 10,000        | 3.27     | 6,500         | 4.83     | 3,500         | 0.37     |
|                                                                                    | 87-88     | 9,800         | 3.60     | 6,800         | 4.97     | 3,000         | 0.50     |
|                                                                                    | 88-89     | 9,000         | 3.69     | 5,900         | 5.56     | 3,100         | 0.11     |
|                                                                                    | 89-90     | 11,800        | 3.70     | 7,200         | 5.84     | 4,600         | 0.35     |
|                                                                                    | 90-91     | 9,000         | 3.25     | 5,400         | 5.47     | 3,600         | -0.08    |
|                                                                                    | 91-92     | 13,000        | 3.04     | 7,600         | 4.88     | 5,400         | 0.46     |
|                                                                                    | 92-93     | 11,400        | 2.67     | 6,600         | 4.73     | 4,800         | -0.16    |
|                                                                                    | 93-94     | 11,800        | 3.23     | 7,600         | 5.01     | 4,200         | 0.00     |
|                                                                                    | 94-95     | 12,000        | 3.20     | 7,400         | 5.26     | 4,600         | -0.11    |
| Oranges, All<br><br>(All varieties --<br>net weight per carton:<br>37.5 pounds)    | 85-86     | 107,800       | 3.39     | 87,200        | 4.16     | 20,600        | 0.13     |
|                                                                                    | 86-87     | 115,800       | 3.75     | 83,400        | 5.08     | 32,400        | 0.32     |
|                                                                                    | 87-88     | 118,000       | 3.89     | 82,600        | 5.15     | 35,400        | 0.93     |
|                                                                                    | 88-89     | 117,800       | 3.93     | 81,200        | 5.04     | 36,600        | 1.45     |
|                                                                                    | 89-90     | 142,800       | 3.89     | 94,200        | 5.00     | 48,600        | 1.73     |
|                                                                                    | 90-91     | 51,200        | 7.27     | 32,400        | 11.21    | 18,800        | 0.49     |
|                                                                                    | 91-92     | 134,800       | 3.22     | 82,700        | 4.92     | 52,100        | 0.52     |
|                                                                                    | 92-93     | 133,600       | 3.54     | 98,200        | 4.84     | 35,400        | -0.08    |
|                                                                                    | 93-94     | 127,200       | 3.64     | 92,200        | 5.02     | 35,000        | -0.01    |
|                                                                                    | 94-95     | 122,000       | 3.76     | 87,000        | 5.35     | 35,000        | -0.19    |

See Footnotes on Page 38.



**CALIFORNIA CITRUS FRUITS: Sales By Utilization And Price Per Carton, 1985-95**

| Crop                                                                                                                                  | Crop Year | All Sales     |          | Fresh Market  |          | Processing    |          |
|---------------------------------------------------------------------------------------------------------------------------------------|-----------|---------------|----------|---------------|----------|---------------|----------|
|                                                                                                                                       |           | Quantity      | Price 1/ | Quantity      | Price 1/ | Quantity      | Price 1/ |
|                                                                                                                                       |           | 1,000 Cartons | \$/Ctn.  | 1,000 Cartons | \$/Ctn.  | 1,000 Cartons | \$/Ctn.  |
| Oranges, Navel & Misc.                                                                                                                | 85-86     | 66,000        | 3.58     | 53,000        | 4.45     | 13,000        | 0.01     |
|                                                                                                                                       | 86-87     | 69,000        | 3.52     | 53,000        | 4.60     | 16,000        | -0.06    |
|                                                                                                                                       | 87-88     | 63,000        | 3.91     | 49,800        | 4.79     | 13,200        | 0.60     |
|                                                                                                                                       | 88-89     | 68,000        | 3.79     | 51,800        | 4.68     | 16,200        | 0.92     |
|                                                                                                                                       | 89-90     | 88,600        | 4.02     | 64,600        | 4.84     | 24,000        | 1.81     |
|                                                                                                                                       | 90-91     | 31,600        | 5.04     | 18,400        | 8.34     | 13,200        | 0.45     |
|                                                                                                                                       | 91-92     | 70,200        | 4.36     | 53,000        | 5.53     | 17,200        | 0.76     |
|                                                                                                                                       | 92-93     | 87,600        | 3.16     | 65,400        | 4.30     | 22,200        | -0.18    |
|                                                                                                                                       | 93-94     | 73,200        | 3.99     | 58,200        | 5.01     | 15,000        | 0.02     |
|                                                                                                                                       | 94-95     | 70,000        | 3.91     | 53,000        | 5.21     | 17,000        | -0.14    |
| Oranges, Valencia                                                                                                                     | 85-86     | 41,800        | 3.09     | 34,200        | 3.70     | 7,600         | 0.32     |
|                                                                                                                                       | 86-87     | 46,800        | 4.09     | 30,400        | 5.92     | 16,400        | 0.69     |
|                                                                                                                                       | 87-88     | 55,000        | 3.85     | 32,800        | 5.69     | 22,200        | 1.13     |
|                                                                                                                                       | 88-89     | 49,800        | 4.12     | 29,400        | 5.68     | 20,400        | 1.86     |
|                                                                                                                                       | 89-90     | 54,200        | 3.68     | 29,600        | 5.37     | 24,600        | 1.65     |
|                                                                                                                                       | 90-91     | 19,600        | 10.87    | 14,000        | 14.98    | 5,600         | 0.59     |
|                                                                                                                                       | 91-92     | 64,600        | 1.99     | 29,700        | 3.84     | 34,900        | 0.41     |
|                                                                                                                                       | 92-93     | 46,000        | 4.24     | 32,800        | 5.92     | 13,200        | 0.08     |
|                                                                                                                                       | 93-94     | 54,000        | 3.16     | 34,000        | 5.04     | 20,000        | -0.03    |
|                                                                                                                                       | 94-95     | 52,000        | 3.55     | 34,000        | 5.55     | 18,000        | -0.24    |
| Lemons<br><br>(Net weight per carton:<br>38 pounds)                                                                                   | 85-86     | 30,200        | 5.65     | 19,000        | 8.51     | 11,200        | 0.78     |
|                                                                                                                                       | 86-87     | 43,000        | 3.56     | 20,000        | 6.69     | 23,000        | 0.83     |
|                                                                                                                                       | 87-88     | 34,000        | 5.02     | 20,200        | 8.16     | 13,800        | 0.42     |
|                                                                                                                                       | 88-89     | 32,400        | 6.19     | 20,600        | 9.19     | 11,800        | 0.95     |
|                                                                                                                                       | 89-90     | 31,600        | 7.60     | 21,000        | 10.63    | 10,600        | 1.59     |
|                                                                                                                                       | 90-91     | 29,600        | 8.19     | 18,780        | 12.16    | 10,820        | 1.29     |
|                                                                                                                                       | 91-92     | 30,200        | 6.32     | 18,180        | 9.93     | 12,020        | 0.87     |
|                                                                                                                                       | 92-93     | 40,800        | 4.97     | 19,800        | 9.22     | 21,000        | 0.97     |
|                                                                                                                                       | 93-94     | 41,400        | 5.00     | 19,000        | 10.10    | 22,400        | 0.68     |
|                                                                                                                                       | 94-95     | 41,000        | 5.57     | 21,960        | 9.95     | 10,040        | 0.52     |
| Tangerines<br><br>(Including Mandarins &<br>Mandarin Hybrids,<br>Tangelos and Tangors)<br><br>(Net weight per carton:<br>37.5 pounds) | 85-86     | 3,600         | 6.10     | 2,540         | 8.55     | 1,060         | 0.21     |
|                                                                                                                                       | 86-87     | 4,460         | 5.76     | 3,264         | 7.62     | 1,196         | 0.69     |
|                                                                                                                                       | 87-88     | 4,180         | 7.73     | 3,048         | 10.34    | 1,132         | 0.69     |
|                                                                                                                                       | 88-89     | 4,080         | 7.04     | 2,950         | 9.33     | 1,130         | 1.07     |
|                                                                                                                                       | 89-90     | 3,300         | 9.45     | 2,480         | 12.12    | 820           | 1.40     |
|                                                                                                                                       | 90-91     | 2,700         | 9.09     | 1,850         | 13.13    | 850           | 0.29     |
|                                                                                                                                       | 91-92     | 4,880         | 7.25     | 3,360         | 10.29    | 1,520         | 0.52     |
|                                                                                                                                       | 92-93     | 4,200         | 6.00     | 2,930         | 8.72     | 1,270         | -0.28    |
|                                                                                                                                       | 93-94     | 4,600         | 5.58     | 3,200         | 8.04     | 1,400         | -0.06    |
|                                                                                                                                       | 94-95     | 4,400         | 6.88     | 3,000         | 10.15    | 1,400         | -0.14    |

1/ Equivalent packinghouse door returns.

2/ Season average prices for all grapefruit are derived by weighting the season average prices for each area by their carton weights.

3/ Prior to 1993-94 net weight per carton was 32 pounds.

**CALIFORNIA CITRUS FRUITS: Grower Returns,  
Month And Season Average Prices (Dollars Per Carton), 1985-95**

| Grapefruit,<br>Desert | Crop<br>Year | Oct. | Nov.  | Dec.  | Jan.  | Feb.  | Mar.  | Apr.  | May   | June  | July  | Aug. | Sept. | Season<br>Avg. Price |
|-----------------------|--------------|------|-------|-------|-------|-------|-------|-------|-------|-------|-------|------|-------|----------------------|
| Fresh                 | 85-86        | ---  | 6.33  | 5.78  | 5.68  | 5.08  | 4.73  | 3.64  | 4.64  | 4.34  | ---   | ---  | ---   | 4.93                 |
|                       | 86-87        | ---  | 4.24  | 4.14  | 3.84  | 4.04  | 3.54  | 3.69  | 4.29  | 4.89  | 4.89  | ---  | ---   | 4.24                 |
|                       | 87-88        | ---  | 5.39  | 4.29  | 3.79  | 3.69  | 3.54  | 3.39  | 3.64  | 3.74  | 3.49  | 3.29 | ---   | 3.74                 |
|                       | 88-89        | ---  | 4.16  | 3.11  | 2.86  | 2.56  | 3.11  | 3.51  | 3.56  | 2.16  | 2.06  | ---  | ---   | 3.21                 |
|                       | 89-90        | ---  | 4.94  | 3.69  | 6.09  | 6.34  | 6.84  | 6.99  | 7.04  | 7.34  | 8.19  | ---  | ---   | 6.54                 |
|                       | 90-91        | ---  | 3.64  | 3.74  | 3.94  | 3.69  | 4.49  | 4.59  | 4.29  | 3.84  | 3.64  | ---  | ---   | 4.42                 |
|                       | 91-92        | ---  | 4.23  | 3.88  | 4.08  | 3.88  | 3.93  | 4.38  | 3.88  | 4.33  | 3.93  | ---  | ---   | 4.08                 |
|                       | 92-93        | ---  | 5.03  | 3.78  | 3.78  | 3.23  | 2.93  | 2.73  | 2.43  | 2.78  | 2.78  | ---  | ---   | 3.13                 |
|                       | 93-94        | ---  | 3.97  | 3.06  | 2.70  | 2.63  | 2.51  | 2.16  | 2.43  | 3.00  | 3.52  | ---  | ---   | 2.76                 |
|                       | 94-95        | ---  | 5.37  | 2.47  | 2.55  | 2.97  | 2.98  | 2.91  | 3.21  | 3.69  | 3.91  | ---  | ---   | 3.31                 |
| Processing            | 85-86        | ---  | 0.33  | 0.33  | 0.33  | 0.33  | 0.33  | 0.33  | 0.33  | 0.36  | 0.36  | ---  | ---   | 0.35                 |
|                       | 86-87        | ---  | 0.46  | 0.46  | 0.46  | 0.46  | 0.46  | 0.46  | 0.46  | 0.44  | 0.44  | ---  | ---   | 0.45                 |
|                       | 87-88        | ---  | 0.58  | 0.58  | 0.58  | 0.58  | 0.58  | 0.58  | 0.58  | 0.58  | 0.58  | 0.58 | ---   | 0.58                 |
|                       | 88-89        | ---  | -0.01 | -0.09 | -0.09 | -0.06 | -0.12 | -0.07 | -0.03 | 0.13  | 0.13  | ---  | ---   | -0.03                |
|                       | 89-90        | ---  | 0.22  | 0.21  | 0.22  | 0.11  | 0.17  | 0.14  | 0.28  | 0.11  | ---   | ---  | ---   | 0.19                 |
|                       | 90-91        | ---  | -0.15 | -0.14 | -0.15 | -0.15 | -0.15 | -0.15 | -0.13 | -0.11 | -0.12 | ---  | ---   | -0.09                |
|                       | 91-92        | ---  | -0.07 | -0.12 | ---   | 0.03  | 0.23  | 0.28  | 0.31  | 0.34  | 0.34  | ---  | ---   | 0.24                 |
|                       | 92-93        | ---  | 0.25  | -0.14 | -0.17 | -0.18 | -0.18 | -0.18 | -0.18 | -0.18 | -0.18 | ---  | ---   | -0.18                |
|                       | 93-94        | ---  | 0.18  | -0.03 | -0.03 | -0.03 | -0.03 | -0.03 | -0.03 | -0.03 | -0.03 | ---  | ---   | -0.01                |
|                       | 94-95        | ---  | -0.09 | -0.11 | -0.11 | -0.11 | -0.11 | -0.09 | -0.03 | -0.11 | -0.11 | ---  | ---   | -0.09                |
| All Sales             | 85-86        | ---  | 5.55  | 4.77  | 4.76  | 3.73  | 3.40  | 2.62  | 2.92  | 2.62  | 0.36  | ---  | ---   | 3.41                 |
|                       | 86-87        | ---  | 3.85  | 3.45  | 3.58  | 3.02  | 2.69  | 2.48  | 2.71  | 2.52  | 1.18  | ---  | ---   | 2.74                 |
|                       | 87-88        | ---  | 5.09  | 3.92  | 3.10  | 3.23  | 2.95  | 2.53  | 2.63  | 2.42  | 1.09  | 1.03 | ---   | 2.54                 |
|                       | 88-89        | ---  | 3.64  | 2.69  | 2.24  | 2.02  | 2.33  | 2.41  | 2.40  | 1.67  | 1.10  | ---  | ---   | 2.33                 |
|                       | 89-90        | ---  | 4.42  | 3.26  | 5.51  | 4.98  | 5.51  | 4.20  | 3.81  | 3.00  | 8.19  | ---  | ---   | 4.55                 |
|                       | 90-91        | ---  | 3.35  | 3.19  | 3.51  | 2.84  | 3.60  | 2.79  | 2.93  | 2.12  | 1.64  | ---  | ---   | 3.13                 |
|                       | 91-92        | ---  | 3.85  | 3.43  | 3.59  | 2.97  | 2.99  | 3.08  | 2.69  | 3.41  | 2.73  | ---  | ---   | 3.09                 |
|                       | 92-93        | ---  | 4.80  | 3.50  | 3.37  | 2.50  | 1.88  | 1.59  | 1.55  | 1.43  | 2.45  | ---  | ---   | 2.09                 |
|                       | 93-94        | ---  | 2.63  | 2.81  | 2.44  | 1.92  | 1.75  | 1.49  | 1.48  | 1.32  | 1.16  | ---  | ---   | 1.85                 |
|                       | 94-95        | ---  | 4.01  | 2.19  | 2.31  | 2.01  | 1.78  | 2.09  | 2.10  | 2.00  | 0.57  | ---  | ---   | 2.19                 |

| Grapefruit,<br>Other<br>Areas | Crop<br>Year | Nov.  | Dec.  | Jan.  | Feb.  | Mar.  | Apr.  | May   | June  | July  | Aug.  | Sept. | Oct.  | Season<br>Avg. Price |
|-------------------------------|--------------|-------|-------|-------|-------|-------|-------|-------|-------|-------|-------|-------|-------|----------------------|
| Fresh                         | 85-86        | ---   | ---   | ---   | ---   | 5.98  | 3.38  | 4.65  | 5.40  | 5.10  | 5.05  | 5.45  | ---   | 5.16                 |
|                               | 86-87        | ---   | ---   | ---   | ---   | 5.95  | 3.60  | 4.85  | 5.47  | 5.17  | 4.07  | 4.67  | 4.52  | 4.83                 |
|                               | 87-88        | ---   | ---   | 11.87 | 6.62  | 2.47  | 2.37  | 4.62  | 4.47  | 5.07  | 4.97  | 5.22  | 4.72  | 4.97                 |
|                               | 88-89        | ---   | 13.41 | 9.71  | 3.71  | 2.18  | 2.26  | 6.11  | 4.76  | 5.31  | 5.86  | 6.91  | 4.66  | 5.56                 |
|                               | 89-90        | 9.69  | 11.64 | 7.64  | 6.04  | 7.19  | 7.89  | 8.44  | 7.74  | 5.84  | 4.44  | 2.07  | 1.79  | 5.84                 |
|                               | 90-91        | 14.14 | 11.29 | 11.94 | 6.69  | 7.14  | 7.79  | 6.94  | 6.24  | 5.59  | 4.64  | 2.67  | 2.07  | 5.47                 |
|                               | 91-92        | 18.08 | 17.43 | 7.33  | 3.93  | 3.88  | 5.13  | 6.18  | 4.98  | 4.58  | 4.68  | 4.68  | 3.83  | 4.88                 |
|                               | 92-93        | 16.18 | 15.43 | 11.08 | 3.53  | 3.03  | 5.48  | 4.98  | 4.78  | 4.83  | 4.68  | 5.03  | 3.38  | 4.73                 |
|                               | 93-94        | 15.48 | 10.77 | 11.61 | 9.15  | 3.95  | 4.83  | 5.44  | 5.58  | 4.59  | 4.70  | 4.80  | 4.69  | 5.01                 |
|                               | 94-95        | 16.82 | 14.05 | 12.47 | 7.86  | 4.68  | 4.40  | 5.69  | 5.64  | 4.41  | 4.66  | ---   | ---   | 5.26                 |
| Processing                    | 85-86        | ---   | ---   | ---   | ---   | ---   | 0.31  | 0.30  | 0.30  | 0.30  | 0.30  | 0.30  | ---   | 0.30                 |
|                               | 86-87        | ---   | ---   | ---   | ---   | 0.40  | 0.40  | 0.40  | 0.36  | 0.36  | 0.36  | 0.36  | 0.36  | 0.37                 |
|                               | 87-88        | ---   | ---   | ---   | ---   | 0.50  | 0.50  | 0.50  | 0.50  | 0.50  | 0.50  | 0.50  | 0.50  | 0.50                 |
|                               | 88-89        | ---   | ---   | -0.12 | 0.21  | 0.28  | 0.16  | 0.10  | 0.17  | 0.10  | 0.06  | 0.09  | 0.18  | 0.11                 |
|                               | 89-90        | 0.46  | 0.63  | 0.38  | 0.32  | 0.33  | 0.54  | 0.80  | 0.44  | 0.61  | -0.01 | -0.11 | -0.05 | 0.35                 |
|                               | 90-91        | -0.14 | -0.13 | -0.12 | -0.14 | -0.15 | -0.12 | -0.12 | -0.13 | -0.14 | -0.14 | -0.10 | -0.10 | -0.08                |
|                               | 91-92        | -0.02 | -0.02 | -0.02 | -0.02 | 0.35  | 0.46  | 0.45  | 0.55  | 0.49  | 0.43  | 0.36  | 0.32  | 0.46                 |
|                               | 92-93        | -0.18 | -0.18 | -0.18 | -0.18 | -0.18 | -0.18 | -0.18 | -0.16 | -0.15 | -0.15 | -0.17 | -0.17 | -0.16                |
|                               | 93-94        | ---   | ---   | ---   | 0.16  | 0.12  | -0.07 | -0.04 | 0.10  | 0.00  | -0.04 | -0.04 | 0.07  | 0.00                 |
|                               | 94-95        | -0.11 | -0.11 | -0.11 | -0.11 | -0.11 | -0.11 | -0.11 | -0.11 | -0.11 | -0.11 | ---   | ---   | -0.11                |
| All Sales                     | 85-86        | ---   | ---   | ---   | ---   | 5.98  | 2.12  | 2.33  | 4.51  | 3.73  | 3.73  | 4.69  | ---   | 3.87                 |
|                               | 86-87        | ---   | ---   | ---   | ---   | 4.10  | 2.89  | 3.15  | 3.56  | 3.58  | 2.98  | 2.93  | 3.35  | 3.27                 |
|                               | 87-88        | ---   | ---   | 11.87 | 6.62  | 2.08  | 1.75  | 2.97  | 3.72  | 3.76  | 3.64  | 3.32  | 3.35  | 3.60                 |
|                               | 88-89        | ---   | 13.41 | 7.75  | 2.31  | 0.91  | 0.58  | 1.61  | 3.06  | 3.75  | 3.96  | 4.55  | 4.21  | 3.69                 |
|                               | 89-90        | 5.08  | 6.14  | 6.73  | 4.61  | 3.76  | 6.53  | 5.35  | 4.97  | 3.65  | 2.45  | 1.16  | 1.40  | 3.70                 |
|                               | 90-91        | 7.01  | 7.49  | 9.53  | 5.72  | 3.83  | 5.91  | 2.85  | 3.86  | 3.45  | 2.58  | 1.56  | 1.62  | 3.25                 |
|                               | 91-92        | 9.03  | 8.71  | 3.66  | 2.94  | 3.29  | 2.87  | 3.18  | 3.17  | 2.91  | 2.82  | 3.06  | 2.92  | 3.04                 |
|                               | 92-93        | 8.00  | 7.63  | 5.45  | 2.79  | 2.63  | 1.31  | 0.71  | 2.45  | 3.19  | 2.65  | 3.00  | 2.65  | 2.67                 |
|                               | 93-94        | 15.48 | 10.77 | 11.61 | 4.15  | 1.78  | 3.95  | 3.54  | 3.45  | 3.19  | 2.75  | 3.59  | 1.80  | 3.23                 |
|                               | 94-95        | 15.69 | 10.78 | 11.54 | 5.20  | 3.31  | 2.64  | 2.47  | 3.50  | 2.19  | 3.28  | ---   | ---   | 3.20                 |

**CALIFORNIA CITRUS FRUITS: Grower Returns,  
Month And Season Average Prices (Dollars Per Carton), 1985-95**

| Oranges,<br>Navel/Misc. | Crop<br>Year | Oct.  | Nov.  | Dec.  | Jan.  | Feb.  | Mar.  | Apr.  | May   | June  | July | Aug. | Sept. | Season<br>Avg. Price |
|-------------------------|--------------|-------|-------|-------|-------|-------|-------|-------|-------|-------|------|------|-------|----------------------|
| Fresh                   | 85-86        | 7.05  | 5.45  | 5.30  | 4.75  | 4.05  | 4.15  | 3.80  | 3.70  | 3.25  | ---  | ---  | ---   | 4.45                 |
|                         | 86-87        | 6.00  | 5.60  | 4.75  | 4.65  | 4.35  | 4.20  | 3.95  | 4.80  | 5.20  | ---  | ---  | ---   | 4.60                 |
|                         | 87-88        | 12.84 | 6.94  | 4.44  | 4.79  | 4.19  | 4.04  | 4.24  | 6.24  | 3.54  | ---  | ---  | ---   | 4.79                 |
|                         | 88-89        | 7.08  | 7.23  | 5.68  | 4.38  | 3.93  | 4.08  | 4.13  | 5.13  | 4.83  | ---  | ---  | ---   | 4.68                 |
|                         | 89-90        | 7.59  | 5.99  | 4.94  | 4.79  | 4.74  | 4.44  | 4.24  | 4.99  | 4.99  | ---  | ---  | ---   | 4.84                 |
|                         | 90-91        | 6.09  | 6.84  | 6.49  | 12.79 | 14.49 | 13.19 | 13.54 | ---   | ---   | ---  | ---  | ---   | 8.34                 |
|                         | 91-92        | ---   | 9.28  | 7.38  | 6.68  | 4.88  | 4.33  | 4.43  | 4.73  | 3.38  | ---  | ---  | ---   | 5.53                 |
|                         | 92-93        | 6.55  | 5.20  | 4.65  | 4.20  | 3.95  | 3.80  | 4.25  | 4.40  | 2.95  | ---  | ---  | ---   | 4.30                 |
|                         | 93-94        | 6.86  | 6.86  | 5.11  | 4.06  | 4.06  | 5.06  | 5.31  | 6.01  | ---   | ---  | ---  | ---   | 5.01                 |
|                         | 94-95        | 6.06  | 6.26  | 5.46  | 5.26  | 4.81  | 4.46  | 5.66  | 5.11  | ---   | ---  | ---  | ---   | 5.21                 |
| Processing              | 85-86        | 0.01  | 0.01  | 0.01  | 0.01  | 0.01  | 0.01  | 0.01  | 0.01  | 0.01  | ---  | ---  | ---   | 0.01                 |
|                         | 86-87        | -0.06 | -0.06 | -0.06 | -0.06 | -0.06 | -0.06 | -0.06 | -0.06 | -0.06 | ---  | ---  | ---   | -0.06                |
|                         | 87-88        | 0.60  | 0.60  | 0.60  | 0.60  | 0.60  | 0.60  | 0.60  | 0.60  | 0.60  | ---  | ---  | ---   | 0.60                 |
|                         | 88-89        | 0.71  | 0.71  | 0.36  | 0.49  | 0.67  | 1.03  | 1.24  | 1.61  | 1.74  | ---  | ---  | ---   | 0.92                 |
|                         | 89-90        | 0.54  | 1.11  | 1.39  | 1.44  | 1.80  | 1.93  | 1.93  | 2.04  | 2.04  | ---  | ---  | ---   | 1.81                 |
|                         | 90-91        | 0.45  | 0.45  | 0.45  | 0.45  | 0.45  | 0.45  | 0.45  | ---   | ---   | ---  | ---  | ---   | 0.45                 |
|                         | 91-92        | ---   | 0.65  | 0.74  | 0.93  | 0.93  | 0.84  | 0.65  | 0.65  | 0.65  | ---  | ---  | ---   | 0.76                 |
|                         | 92-93        | -0.19 | -0.19 | -0.19 | -0.19 | -0.19 | -0.19 | -0.19 | -0.10 | 0.18  | ---  | ---  | ---   | -0.18                |
|                         | 93-94        | -0.09 | -0.18 | -0.18 | -0.14 | 0.09  | 0.18  | -0.01 | -0.01 | ---   | ---  | ---  | ---   | 0.02                 |
|                         | 94-95        | -0.12 | -0.12 | -0.03 | -0.03 | -0.12 | -0.18 | -0.22 | -0.22 | ---   | ---  | ---  | ---   | -0.14                |
| All Sales               | 85-86        | 4.71  | 4.86  | 4.76  | 4.00  | 3.37  | 3.27  | 2.63  | 2.67  | 2.04  | ---  | ---  | ---   | 3.58                 |
|                         | 86-87        | 4.88  | 4.80  | 4.05  | 3.71  | 3.20  | 3.11  | 2.79  | 3.29  | 2.95  | ---  | ---  | ---   | 3.52                 |
|                         | 87-88        | 11.79 | 6.50  | 3.96  | 3.96  | 3.39  | 3.17  | 3.26  | 4.45  | 2.56  | ---  | ---  | ---   | 3.91                 |
|                         | 88-89        | 5.41  | 6.09  | 4.89  | 3.54  | 3.08  | 3.25  | 3.40  | 4.18  | 3.60  | ---  | ---  | ---   | 3.79                 |
|                         | 89-90        | 6.41  | 5.20  | 4.38  | 4.20  | 3.99  | 3.62  | 3.41  | 3.96  | 3.82  | ---  | ---  | ---   | 4.02                 |
|                         | 90-91        | 4.87  | 5.94  | 5.45  | 3.94  | 4.67  | 6.82  | 10.27 | ---   | ---   | ---  | ---  | ---   | 5.04                 |
|                         | 91-92        | ---   | 8.06  | 6.42  | 5.75  | 4.09  | 3.44  | 3.20  | 3.25  | 2.25  | ---  | ---  | ---   | 4.36                 |
|                         | 92-93        | 4.64  | 4.14  | 3.85  | 3.31  | 2.91  | 2.65  | 2.92  | 2.88  | 1.57  | ---  | ---  | ---   | 3.16                 |
|                         | 93-94        | 5.99  | 6.07  | 4.43  | 3.34  | 3.25  | 3.84  | 3.88  | 4.29  | ---   | ---  | ---  | ---   | 3.99                 |
|                         | 94-95        | 4.52  | 4.88  | 4.36  | 4.40  | 3.52  | 3.12  | 3.98  | 4.27  | ---   | ---  | ---  | ---   | 3.91                 |

| Oranges,<br>Valencia | Crop<br>Year | Feb.  | Mar.  | Apr.  | May   | June  | July  | Aug.  | Sept. | Oct.  | Nov.  | Dec. | Jan. | Season<br>Avg. Price |
|----------------------|--------------|-------|-------|-------|-------|-------|-------|-------|-------|-------|-------|------|------|----------------------|
| Fresh                | 85-86        | 3.30  | 2.80  | 3.20  | 3.95  | 3.45  | 3.45  | 3.60  | 3.95  | 4.15  | 4.00  | ---  | ---  | 3.70                 |
|                      | 86-87        | ---   | 4.92  | 5.42  | 5.67  | 5.87  | 6.07  | 5.07  | 6.37  | 6.97  | 6.07  | ---  | ---  | 5.92                 |
|                      | 87-88        | ---   | 6.24  | 6.89  | 7.19  | 6.84  | 5.69  | 5.29  | 5.49  | 3.59  | 2.84  | ---  | ---  | 5.69                 |
|                      | 88-89        | ---   | 6.43  | 5.68  | 5.48  | 5.73  | 6.08  | 5.78  | 5.88  | 5.08  | 4.53  | ---  | ---  | 5.68                 |
|                      | 89-90        | ---   | 5.66  | 5.61  | 6.76  | 6.01  | 5.61  | 5.01  | 5.12  | 4.27  | 3.97  | ---  | ---  | 5.37                 |
|                      | 90-91        | 15.24 | 14.99 | 16.59 | 14.99 | 14.69 | 14.09 | 14.64 | 15.53 | 14.63 | ---   | ---  | ---  | 14.98                |
|                      | 91-92        | ---   | 4.89  | 4.84  | 4.74  | 4.04  | 3.59  | 3.44  | 3.44  | 3.54  | 3.54  | ---  | ---  | 3.84                 |
|                      | 92-93        | 3.52  | 4.62  | 5.02  | 4.37  | 4.47  | 5.02  | 6.62  | 9.67  | 9.52  | 4.17  | ---  | ---  | 5.92                 |
|                      | 93-94        | 6.09  | 5.89  | 5.34  | 5.59  | 5.24  | 4.74  | 5.09  | 4.84  | 4.09  | 4.79  | ---  | ---  | 5.04                 |
|                      | 94-95        | 5.20  | 5.15  | 5.50  | 6.05  | 5.85  | 5.50  | 5.55  | ---   | ---   | ---   | ---  | ---  | 5.55                 |
| Processing           | 85-86        | 0.32  | 0.32  | 0.32  | 0.32  | 0.32  | 0.32  | 0.32  | 0.32  | 0.32  | 0.32  | ---  | ---  | 0.32                 |
|                      | 86-87        | ---   | 0.69  | 0.69  | 0.69  | 0.69  | 0.69  | 0.69  | 0.69  | 0.69  | 0.69  | ---  | ---  | 0.69                 |
|                      | 87-88        | ---   | 1.13  | 1.13  | 1.13  | 1.13  | 1.13  | 1.13  | 1.13  | 1.13  | 1.13  | ---  | ---  | 1.13                 |
|                      | 88-89        | ---   | 0.97  | 1.22  | 1.44  | 2.08  | 2.17  | 1.96  | 1.75  | 1.75  | 2.17  | ---  | ---  | 1.86                 |
|                      | 89-90        | ---   | 2.08  | 2.11  | 2.24  | 2.24  | 2.01  | 1.41  | 1.27  | 1.27  | 0.65  | ---  | ---  | 1.65                 |
|                      | 90-91        | 0.51  | 0.51  | 0.41  | 0.61  | 0.61  | 0.61  | 0.51  | 0.54  | 0.64  | ---   | ---  | ---  | 0.59                 |
|                      | 91-92        | ---   | 0.87  | 0.65  | 0.65  | 0.65  | 0.55  | 0.34  | 0.24  | 0.24  | 0.34  | ---  | ---  | 0.41                 |
|                      | 92-93        | -0.27 | -0.27 | -0.27 | -0.16 | -0.06 | 0.16  | 0.26  | 0.36  | 0.36  | -0.16 | ---  | ---  | 0.08                 |
|                      | 93-94        | 0.07  | 0.18  | -0.03 | -0.03 | -0.03 | -0.03 | -0.03 | -0.03 | -0.03 | -0.03 | ---  | ---  | -0.03                |
|                      | 94-95        | -0.12 | -0.19 | -0.24 | -0.24 | -0.24 | -0.24 | -0.24 | ---   | ---   | ---   | ---  | ---  | -0.24                |
| All Sales            | 85-86        | 2.71  | 2.54  | 2.85  | 3.41  | 2.97  | 2.70  | 2.86  | 3.20  | 3.65  | 3.85  | ---  | ---  | 3.09                 |
|                      | 86-87        | ---   | 3.46  | 3.49  | 4.09  | 3.97  | 3.88  | 3.56  | 4.57  | 5.13  | 3.92  | ---  | ---  | 4.09                 |
|                      | 87-88        | ---   | 4.97  | 5.31  | 5.64  | 4.96  | 4.13  | 3.60  | 3.66  | 2.30  | 1.75  | ---  | ---  | 3.85                 |
|                      | 88-89        | ---   | 4.79  | 3.87  | 4.09  | 4.28  | 4.54  | 4.16  | 4.17  | 3.54  | 3.29  | ---  | ---  | 4.12                 |
|                      | 89-90        | ---   | 4.47  | 4.19  | 5.04  | 4.53  | 3.92  | 3.24  | 3.22  | 2.82  | 2.56  | ---  | ---  | 3.68                 |
|                      | 90-91        | 11.56 | 10.17 | 10.92 | 11.19 | 10.91 | 9.85  | 10.38 | 11.81 | 11.46 | ---   | ---  | ---  | 10.87                |
|                      | 91-92        | ---   | 3.79  | 3.24  | 3.08  | 2.45  | 1.94  | 1.51  | 1.53  | 1.67  | 1.59  | ---  | ---  | 1.99                 |
|                      | 92-93        | 2.89  | 3.19  | 3.25  | 3.24  | 3.25  | 3.56  | 4.65  | 6.95  | 6.90  | 1.70  | ---  | ---  | 4.24                 |
|                      | 93-94        | 4.59  | 4.65  | 4.14  | 4.35  | 3.82  | 3.06  | 3.14  | 2.74  | 1.78  | 2.42  | ---  | ---  | 3.16                 |
|                      | 94-95        | 3.43  | 4.39  | 4.29  | 4.48  | 4.03  | 4.07  | 3.17  | ---   | ---   | ---   | ---  | ---  | 3.55                 |

**CALIFORNIA CITRUS FRUITS: Grower Returns,  
Month And Season Average Prices (Dollars Per Carton), 1985-95**

| Lemons, All | Crop Year | Aug.  | Sept. | Oct.  | Nov.  | Dec. | Jan.  | Feb.  | Mar.  | Apr.  | May   | June  | July  | Season Avg. Price |
|-------------|-----------|-------|-------|-------|-------|------|-------|-------|-------|-------|-------|-------|-------|-------------------|
| Fresh       | 85-86     | 18.41 | 19.41 | 15.01 | 9.76  | 7.91 | 7.41  | 5.71  | 5.26  | 5.71  | 5.51  | 7.86  | 8.51  | 8.51              |
|             | 86-87     | 5.44  | 3.29  | 5.14  | 5.74  | 5.54 | 5.54  | 6.09  | 6.89  | 6.69  | 6.64  | 8.19  | 9.99  | 6.69              |
|             | 87-88     | 11.21 | 10.66 | 8.01  | 6.31  | 5.31 | 4.76  | 5.41  | 6.86  | 7.21  | 7.96  | 9.96  | 11.06 | 8.16              |
|             | 88-89     | 12.54 | 11.14 | 8.64  | 7.24  | 6.19 | 6.14  | 6.74  | 7.64  | 8.24  | 9.59  | 10.89 | 11.59 | 9.19              |
|             | 89-90     | 12.38 | 12.63 | 12.33 | 9.38  | 7.58 | 8.03  | 9.23  | 10.03 | 10.28 | 10.58 | 11.18 | 11.53 | 10.63             |
|             | 90-91     | 10.26 | 10.46 | 10.36 | 5.81  | 5.91 | 15.41 | 11.56 | 10.91 | 12.71 | 14.36 | 13.81 | 16.96 | 12.16             |
|             | 91-92     | 16.38 | 16.78 | 14.13 | 11.58 | 4.78 | 6.23  | 7.18  | 7.68  | 8.63  | 8.73  | 9.38  | 9.63  | 9.93              |
|             | 92-93     | 9.82  | 10.82 | 8.37  | 4.47  | 5.57 | 6.12  | 6.17  | 6.87  | 7.82  | 9.32  | 14.12 | 14.62 | 9.22              |
|             | 93-94     | 17.25 | 16.90 | 13.15 | 9.15  | 6.10 | 4.95  | 4.25  | 5.35  | 7.15  | 8.55  | 12.30 | 16.00 | 10.10             |
|             | 94-95     | 18.45 | 16.25 | 10.40 | 7.85  | 6.85 | 6.65  | 6.10  | 6.10  | 7.70  | 9.95  | 14.55 | 16.95 | 9.95              |
| Processing  | 85-86     | 0.78  | 0.78  | 0.78  | 0.78  | 0.78 | 0.78  | 0.78  | 0.78  | 0.78  | 0.78  | 0.78  | 0.78  | 0.78              |
|             | 86-87     | 0.83  | 0.83  | 0.83  | 0.83  | 0.83 | 0.83  | 0.83  | 0.83  | 0.83  | 0.83  | 0.83  | 0.83  | 0.83              |
|             | 87-88     | 0.42  | 0.42  | 0.42  | 0.42  | 0.42 | 0.42  | 0.42  | 0.42  | 0.42  | 0.42  | 0.42  | 0.42  | 0.42              |
|             | 88-89     | 0.42  | 0.42  | 0.42  | 1.11  | 1.13 | 1.03  | 1.03  | 1.05  | 1.06  | 1.07  | 1.07  | 1.07  | 0.95              |
|             | 89-90     | 1.15  | 1.15  | 1.15  | 1.28  | 1.49 | 1.63  | 1.70  | 1.73  | 1.73  | 1.73  | 1.73  | 1.77  | 1.59              |
|             | 90-91     | 1.78  | 1.81  | 1.81  | 1.64  | 1.19 | 1.02  | 1.02  | 1.02  | 1.02  | 1.02  | 1.02  | 1.02  | 1.29              |
|             | 91-92     | 0.98  | 0.98  | 0.98  | 0.84  | 0.88 | 0.91  | 0.88  | 0.84  | 0.84  | 0.84  | 0.88  | 0.88  | 0.87              |
|             | 92-93     | 0.87  | 0.90  | 0.88  | 1.01  | 1.01 | 1.01  | 1.01  | 1.01  | 1.01  | 0.94  | 0.94  | 0.94  | 0.97              |
|             | 93-94     | 0.93  | 0.93  | 0.93  | 0.72  | 0.72 | 0.65  | 0.65  | 0.65  | 0.65  | 0.65  | 0.65  | 0.65  | 0.68              |
|             | 94-95     | 0.65  | 0.65  | 0.65  | 0.51  | 0.51 | 0.51  | 0.51  | 0.51  | 0.51  | 0.51  | 0.51  | 0.51  | 0.52              |
| All Sales   | 85-86     | 12.42 | 12.50 | 10.57 | 6.92  | 5.45 | 4.95  | 3.88  | 3.55  | 3.63  | 3.65  | 5.31  | 5.83  | 5.65              |
|             | 86-87     | 3.45  | 2.00  | 2.94  | 2.71  | 2.40 | 2.60  | 2.91  | 3.11  | 3.14  | 3.93  | 5.71  | 6.80  | 3.56              |
|             | 87-88     | 7.57  | 5.91  | 5.31  | 3.44  | 2.81 | 2.26  | 2.58  | 4.40  | 4.73  | 5.46  | 7.49  | 8.15  | 5.02              |
|             | 88-89     | 9.56  | 7.60  | 4.85  | 4.37  | 3.83 | 3.91  | 4.06  | 4.45  | 5.52  | 7.49  | 8.98  | 9.29  | 6.19              |
|             | 89-90     | 9.86  | 9.87  | 8.56  | 6.14  | 5.33 | 6.20  | 6.59  | 6.63  | 7.11  | 7.61  | 8.13  | 8.21  | 7.60              |
|             | 90-91     | 7.11  | 7.58  | 6.89  | 3.90  | 3.12 | 4.64  | 6.98  | 8.68  | 10.51 | 12.00 | 10.89 | 12.68 | 8.19              |
|             | 91-92     | 11.72 | 11.97 | 10.74 | 7.49  | 2.98 | 3.57  | 4.24  | 4.91  | 5.24  | 5.37  | 6.13  | 6.25  | 6.32              |
|             | 92-93     | 6.29  | 7.22  | 4.72  | 2.59  | 2.78 | 3.23  | 3.14  | 3.11  | 3.56  | 5.17  | 9.54  | 10.59 | 4.97              |
|             | 93-94     | 12.94 | 12.45 | 8.51  | 5.44  | 3.04 | 2.12  | 2.00  | 2.41  | 3.25  | 4.12  | 6.80  | 7.11  | 5.00              |
|             | 94-95     | 15.69 | 11.91 | 6.37  | 4.84  | 3.14 | 3.78  | 2.80  | 3.12  | 3.61  | 6.43  | 11.15 | 11.35 | 5.57              |

| Tangerines | Crop Year | Oct.  | Nov.  | Dec.  | Jan.  | Feb.  | Mar.  | Apr.  | May   | June | July | Aug. | Sept. | Season Avg. Price |
|------------|-----------|-------|-------|-------|-------|-------|-------|-------|-------|------|------|------|-------|-------------------|
| Fresh      | 85-86     | ---   | 13.90 | 11.90 | 8.85  | 9.85  | 5.95  | 6.40  | 7.35  | 2.40 | ---  | ---  | ---   | 8.55              |
|            | 86-87     | ---   | 13.47 | 8.67  | 7.17  | 7.92  | 6.72  | 5.92  | 7.32  | ---  | ---  | ---  | ---   | 7.62              |
|            | 87-88     | ---   | 20.89 | 13.99 | 7.34  | 10.34 | 10.09 | 9.89  | 5.79  | 5.79 | 5.79 | ---  | ---   | 10.34             |
|            | 88-89     | ---   | 14.98 | 11.43 | 9.38  | 9.63  | 8.43  | 6.43  | 6.63  | 6.63 | ---  | ---  | ---   | 9.33              |
|            | 89-90     | ---   | 16.66 | 14.36 | 13.21 | 14.26 | 9.86  | 9.11  | 9.56  | ---  | ---  | ---  | ---   | 12.12             |
|            | 90-91     | ---   | 13.79 | 11.59 | 12.34 | 12.99 | 15.84 | 14.44 | 14.39 | ---  | ---  | ---  | ---   | 13.13             |
|            | 91-92     | 19.99 | 16.59 | 9.99  | 9.09  | 7.69  | 7.59  | 7.79  | 7.44  | 7.44 | ---  | ---  | ---   | 10.29             |
|            | 92-93     | 13.92 | 8.52  | 8.07  | 8.17  | 8.27  | 9.52  | 9.22  | ---   | ---  | ---  | ---  | ---   | 8.72              |
|            | 93-94     | 13.69 | 10.24 | 7.29  | 6.09  | 7.09  | 7.34  | 7.34  | 5.79  | ---  | ---  | ---  | ---   | 8.04              |
|            | 94-95     | 13.95 | 10.40 | 7.85  | 9.30  | 10.75 | 11.25 | 13.25 | 13.25 | ---  | ---  | ---  | ---   | 10.15             |
| Processing | 85-86     | ---   | 0.21  | 0.21  | 0.21  | 0.21  | 0.21  | 0.21  | 0.21  | 0.21 | ---  | ---  | ---   | 0.21              |
|            | 86-87     | ---   | 0.69  | 0.69  | 0.69  | 0.69  | 0.69  | 0.69  | 0.69  | 0.69 | ---  | ---  | ---   | 0.69              |
|            | 87-88     | ---   | ---   | 0.69  | 0.69  | 0.69  | 0.69  | 0.69  | 0.69  | 0.69 | 0.69 | ---  | ---   | 0.69              |
|            | 88-89     | ---   | ---   | 1.07  | 1.07  | 1.07  | 1.07  | 1.07  | 1.07  | 1.07 | ---  | ---  | ---   | 1.07              |
|            | 89-90     | ---   | 0.67  | 0.93  | 1.35  | 1.53  | 1.55  | 1.67  | 1.67  | 1.67 | ---  | ---  | ---   | 1.40              |
|            | 90-91     | ---   | 0.26  | 0.26  | 0.26  | 0.26  | 0.26  | 0.26  | 0.26  | ---  | ---  | ---  | ---   | 0.29              |
|            | 91-92     | ---   | 0.41  | 0.46  | 0.62  | 0.62  | 0.53  | 0.38  | 0.38  | 0.46 | ---  | ---  | ---   | 0.52              |
|            | 92-93     | -0.28 | -0.28 | -0.28 | -0.28 | -0.28 | -0.28 | -0.28 | -0.20 | ---  | ---  | ---  | ---   | -0.28             |
|            | 93-94     | -0.16 | -0.24 | -0.24 | -0.20 | ---   | 0.08  | -0.09 | -0.09 | ---  | ---  | ---  | ---   | -0.06             |
|            | 94-95     | -0.16 | -0.16 | -0.08 | -0.08 | -0.16 | -0.21 | -0.25 | -0.25 | ---  | ---  | ---  | ---   | -0.14             |
| All Sales  | 85-86     | ---   | 11.51 | 7.61  | 7.28  | 6.90  | 4.08  | 4.32  | 4.40  | 1.67 | ---  | ---  | ---   | 6.10              |
|            | 86-87     | ---   | 10.59 | 6.61  | 6.75  | 6.17  | 4.38  | 3.89  | 5.52  | ---  | ---  | ---  | ---   | 5.76              |
|            | 87-88     | ---   | 20.89 | 12.96 | 7.23  | 8.73  | 6.25  | 4.30  | 2.25  | 1.97 | 1.74 | ---  | ---   | 7.73              |
|            | 88-89     | ---   | 14.98 | 9.71  | 8.76  | 7.40  | 5.53  | 4.56  | 2.79  | 2.59 | ---  | ---  | ---   | 7.04              |
|            | 89-90     | ---   | 11.86 | 12.02 | 12.22 | 10.68 | 7.54  | 6.63  | 7.58  | 1.67 | ---  | ---  | ---   | 9.45              |
|            | 90-91     | ---   | 10.23 | 10.01 | 10.89 | 2.30  | 10.55 | 9.72  | 7.33  | ---  | ---  | ---  | ---   | 9.09              |
|            | 91-92     | 19.99 | 15.92 | 9.69  | 7.15  | 4.76  | 4.02  | 4.32  | 4.41  | 1.85 | ---  | ---  | ---   | 7.25              |
|            | 92-93     | 11.68 | 7.30  | 6.11  | 5.04  | 5.12  | 6.31  | 1.63  | -0.20 | ---  | ---  | ---  | ---   | 6.00              |
|            | 93-94     | 12.06 | 9.59  | 6.43  | 3.51  | 4.39  | 3.71  | 4.37  | 3.83  | ---  | ---  | ---  | ---   | 5.58              |
|            | 94-95     | 10.15 | 7.55  | 5.33  | 5.52  | 7.17  | 7.89  | 10.08 | 5.15  | ---  | ---  | ---  | ---   | 6.88              |

**CALIFORNIA BERRIES: Monthly And Season Average Prices (Dollars Per Cwt.), 1986-95**

| Straw-berries <u>1/</u> | Crop Year | Jan.   | Feb.   | Mar.   | Apr.  | May   | June  | July  | Aug.  | Sept. | Oct.   | Nov.   | Dec.   | Season Avg. Price |
|-------------------------|-----------|--------|--------|--------|-------|-------|-------|-------|-------|-------|--------|--------|--------|-------------------|
| Fresh Sales             | 1986      | 99.60  | 85.60  | 69.00  | 52.90 | 43.00 | 53.20 | 55.00 | 83.70 | 82.50 | 144.00 | 122.00 | ---    | 58.30             |
|                         | 1987      | 101.00 | 125.00 | 92.70  | 46.10 | 50.40 | 54.90 | 55.90 | 54.00 | 68.10 | 116.00 | 146.00 | ---    | 58.00             |
|                         | 1988      | ---    | 74.30  | 64.30  | 42.70 | 50.00 | 43.90 | 50.00 | 55.00 | 60.00 | 70.00  | 160.00 | ---    | 52.00             |
|                         | 1989      | ---    | 110.00 | 95.00  | 45.00 | 35.00 | 55.00 | 30.00 | 35.00 | 65.00 | 95.00  | 175.00 | ---    | 49.30             |
|                         | 1990      | 150.00 | 115.00 | 115.00 | 50.00 | 35.00 | 45.00 | 40.00 | 50.00 | 55.00 | 75.00  | 100.00 | 125.00 | 52.00             |
|                         | 1991      | ---    | 110.00 | 100.00 | 60.00 | 50.00 | 35.00 | 45.00 | 35.00 | 35.00 | 55.00  | 110.00 | ---    | 50.90             |
|                         | 1992      | 135.00 | 95.00  | 85.00  | 50.00 | 41.00 | 64.20 | 49.30 | 89.20 | 61.10 | 70.70  | 115.00 | ---    | 59.20             |
|                         | 1993      | 102.00 | 80.20  | 57.70  | 42.40 | 38.30 | 42.50 | 31.60 | 46.90 | 48.90 | 64.20  | 93.70  | ---    | 46.80             |
|                         | 1994      | 77.90  | 99.00  | 94.40  | 57.50 | 56.40 | 50.40 | 49.30 | 49.00 | 46.60 | 82.40  | 89.90  | ---    | 59.10             |
|                         | 1995      | ---    | 67.00  | 65.50  | 57.60 | 66.90 | 53.10 | 50.70 | 63.30 | 41.50 | 49.70  | 115.00 | ---    | 57.40             |

1/ Prices are F.O.B. shipping point.

**CALIFORNIA RAISINS: Production And Average Grower Returns, By Variety, 1986-95**

| Raisins <u>1/</u>      | Crop Year | All Varieties | Natural Dried     |         |          |               | Dehydrated, All Types |
|------------------------|-----------|---------------|-------------------|---------|----------|---------------|-----------------------|
|                        |           |               | Thompson Seedless | Muscats | Sultanas | Zante Currant |                       |
|                        |           | Tons          |                   |         |          |               |                       |
| Production             | 1986      | 277,000       | 247,750           | 600     | 350      | 3,300         | 25,000                |
|                        | 1987      | 356,000       | 325,900           | 400     | 300      | 3,000         | 26,400                |
|                        | 1988      | 363,000       | 329,600           | 300     | 300      | 4,100         | 28,700                |
|                        | 1989      | 430,000       | 396,000           | 100     | 300      | 3,900         | 29,700                |
|                        | 1990      | 393,000       | 357,400           | 600     | 250      | 4,450         | 30,300                |
|                        | 1991      | 345,000       | 313,500           | 230     | 270      | 4,200         | 26,800                |
|                        | 1992      | 388,300       | 346,850           | 50      | 280      | 4,720         | 36,400                |
|                        | 1993      | 382,000       | 338,000           | 170     | 330      | 5,700         | 37,800                |
|                        | 1994      | 418,600       | 378,400           | 230     | 270      | 5,800         | 33,900                |
|                        | 1995      | 306,000       | 1/97              | 1/97    | 1/97     | 1/97          | 1/97                  |
| Dollars/Ton            |           |               |                   |         |          |               |                       |
| Average Grower Returns | 1986      | 757           | 744               | 495     | 650      | 770           | 900                   |
|                        | 1987      | 817           | 809               | 600     | 640      | 910           | 910                   |
|                        | 1988      | 898           | 890               | 473     | 750      | 983           | 985                   |
|                        | 1989      | 977           | 969               | 599     | 807      | 1,080         | 1,060                 |
|                        | 1990      | 903           | 884               | 730     | 799      | 1,290         | 1,070                 |
|                        | 1991      | 963           | 943               | 749     | 813      | 1,400         | 1,130                 |
|                        | 1992      | 911           | 873               | 800     | 825      | 1,560         | 1,190                 |
|                        | 1993      | 937           | 908               | 1,080   | 817      | 1,260         | 1,150                 |
|                        | 1994      | 923           | 908               | 1,000   | 773      | 1,000         | 1,080                 |
|                        | 1995      | 875           | 1/97              | 1/97    | 1/97     | 1/97          | 1/97                  |

1/ Excludes raisins produced from table type grapes.

**CALIFORNIA NON-CITRUS FRUITS: Unutilized Production, 1986-95**

| Crop                    | 1986   | 1987   | 1988   | 1989   | 1990   | 1991   | 1992   | 1993   | 1994   | 1995   |
|-------------------------|--------|--------|--------|--------|--------|--------|--------|--------|--------|--------|
| Unharvested Tons        |        |        |        |        |        |        |        |        |        |        |
| Apricots                | ---    | 8,000  | 8,000  | 1,000  | 2,000  | 4,000  | ---    | ---    | 13,000 | ---    |
| Harvested Not Sold Tons |        |        |        |        |        |        |        |        |        |        |
| Kiwifruit               | 900    | 2,400  | 3,200  | 3,000  | 5,000  | 2,800  | 4,600  | 4,600  | 1,900  | 6,100  |
| Peaches, Clingstone     | 29,750 | 35,000 | 37,000 | 34,000 | 28,500 | 30,000 | 33,000 | 30,000 | 23,500 | 22,000 |
| Pomegranate             | 2,600  | 2,000  | 2,000  | 1,000  | ---    | ---    | ---    | ---    | ---    | ---    |

# CALIFORNIA LIVESTOCK AND DAIRY

## SUMMARY OF LIVESTOCK INVENTORY AND CASH RECEIPTS

The increase in California's milk and cream cash receipts offset declines in most other livestock. Livestock cash receipts totaled \$5.55 billion, 1% above 1994.

Red meat production, at 2.12 billion pounds, was 1% above last year's production. Beef production, at 1.97 billion pounds, was up 1% from a year ago. Lamb and mutton production of 60.1 million pounds was up 17%. Pork production of 88.6 million pounds was 7% below a year ago.

Poultry production, at 1.70 billion pounds, increased 4% from 1994. Broiler production of 1.18 billion pounds increased 4% from the previous year. Turkey production was 3% higher at 462 million pounds. The 54.4 million pounds of other chickens produced was up 3% from a year ago.

Milk production, at 25.3 billion pounds, was fractionally above a year ago. Egg production, at 6.44 billion eggs, was down 2%. Honey production of 39.1 million pounds increased by 63% from the 1994 production year. Wool production of 5.25 million pounds was 1% less than 1994.

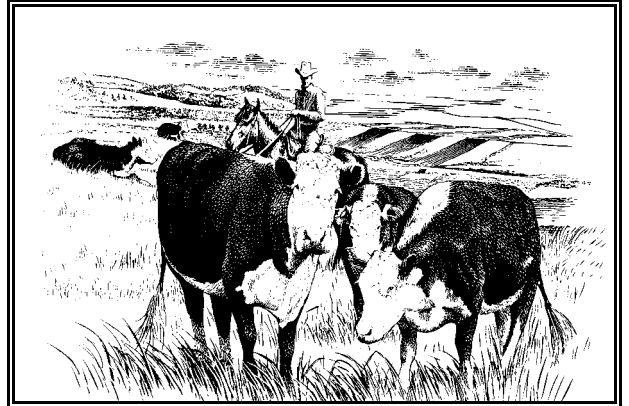

## CALIFORNIA LIVESTOCK CASH RECEIPTS

**Livestock Commodities as Percent of Total Livestock Cash Receipts, 1995**

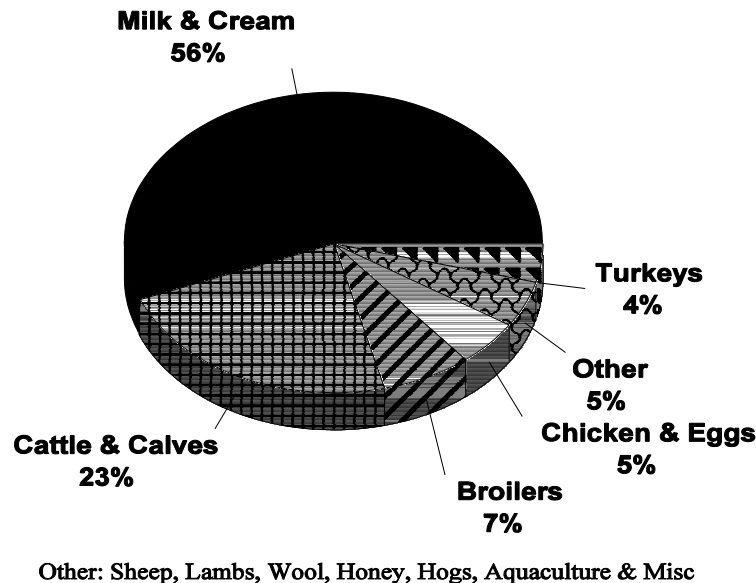

**CALIFORNIA CATTLE BY CLASS, JANUARY 1, 1987-96**

| Year | Cows That Have Calved |       |       | Heifers 500 Lbs. & Over |          |               | Other Cattle          |                       |                        |                     |
|------|-----------------------|-------|-------|-------------------------|----------|---------------|-----------------------|-----------------------|------------------------|---------------------|
|      | Beef                  | Dairy | All   | Replacements            |          | Other Heifers | Calves Under 500 Lbs. | Bulls 500 Lbs. & Over | Steers 500 Lbs. & Over | All Cattle & Calves |
|      |                       |       |       | Beef Cow                | Milk Cow |               |                       |                       |                        |                     |
|      | 1,000 Head            |       |       |                         |          |               |                       |                       |                        |                     |
| 1987 | 970                   | 1,062 | 2,032 | 155                     | 470      | 175           | 1,068                 | 65                    | 785                    | 4,750               |
| 1988 | 920                   | 1,071 | 1,991 | 155                     | 475      | 164           | 1,020                 | 65                    | 780                    | 4,650               |
| 1989 | 925                   | 1,095 | 2,020 | 150                     | 485      | 190           | 985                   | 65                    | 805                    | 4,700               |
| 1990 | 955                   | 1,115 | 2,070 | 155                     | 525      | 185           | 945                   | 70                    | 750                    | 4,700               |
| 1991 | 900                   | 1,150 | 2,050 | 155                     | 505      | 185           | 1,015                 | 70                    | 620                    | 4,600               |
| 1992 | 880                   | 1,160 | 2,040 | 145                     | 555      | 190           | 920                   | 70                    | 630                    | 4,550               |
| 1993 | 840                   | 1,200 | 2,040 | 140                     | 560      | 190           | 930                   | 70                    | 670                    | 4,600               |
| 1994 | 810                   | 1,220 | 2,030 | 140                     | 590      | 160           | 980                   | 70                    | 580                    | 4,550               |
| 1995 | 840                   | 1,250 | 2,090 | 160                     | 585      | 180           | 970                   | 75                    | 590                    | 4,650               |
| 1996 | 840                   | 1,260 | 2,100 | 160                     | 600      | 170           | 950                   | 70                    | 550                    | 4,600               |

**CALIFORNIA CATTLE INVENTORY, SUPPLY AND DISPOSITION, 1986-95**

| Year | Beginning<br>Inventory<br>January 1 | Calf Crop | Inshipment<br>s | Marketings <u>1/</u> |        | Farm<br>Slaughter<br>Cattle &<br>Calves <u>2/</u> | Deaths |        | Ending<br>Inventory<br>January 1 |
|------|-------------------------------------|-----------|-----------------|----------------------|--------|---------------------------------------------------|--------|--------|----------------------------------|
|      |                                     |           |                 | Cattle               | Calves |                                                   | Cattle | Calves |                                  |
|      | 1,000 Head                          |           |                 |                      |        |                                                   |        |        |                                  |
| 1986 | 5,000                               | 1,780     | 1,220           | 2,554                | 380    | 26                                                | 100    | 190    | 4,750                            |
| 1987 | 4,750                               | 1,740     | 846             | 2,123                | 286    | 25                                                | 90     | 162    | 4,650                            |
| 1988 | 4,650                               | 1,770     | 867             | 2,100                | 247    | 25                                                | 75     | 140    | 4,700                            |
| 1989 | 4,700                               | 1,770     | 850             | 2,170                | 228    | 17                                                | 70     | 135    | 4,700                            |
| 1990 | 4,700                               | 1,750     | 737             | 2,185                | 178    | 19                                                | 75     | 130    | 4,600                            |
| 1991 | 4,600                               | 1,700     | 728             | 2,069                | 180    | 19                                                | 70     | 140    | 4,550                            |
| 1992 | 4,550                               | 1,720     | 630             | 1,930                | 150    | 20                                                | 75     | 125    | 4,600                            |
| 1993 | 4,600                               | 1,700     | 600             | 1,927                | 180    | 18                                                | 70     | 155    | 4,550                            |
| 1994 | 4,550                               | 1,750     | 700             | 1,961                | 162    | 17                                                | 75     | 135    | 4,650                            |
| 1995 | 4,650                               | 1,780     | 800             | 2,135                | 252    | 18                                                | 90     | 135    | 4,600                            |

<sup>1/</sup> Includes custom slaughter for use on farms where produced, but excludes interfarm sales.

<sup>2/</sup> Excludes custom slaughter for farmers at commercial establishments.

**CALIFORNIA CATTLE OPERATIONS AND INVENTORY, PERCENTAGE BY SIZE GROUPS, 1986-95**

| Year | 1 - 99 Head |           | 100 - 499 Head |           | 500-999 Head <sup>1/</sup> |           | 1,000+ Head |           |
|------|-------------|-----------|----------------|-----------|----------------------------|-----------|-------------|-----------|
|      | Operation   | Inventory | Operation      | Inventory | Operation                  | Inventory | Operation   | Inventory |
|      | Percent     |           |                |           |                            |           |             |           |
| 1986 | 80.6        | 8.4       | 13.2           | 23.2      | 6.2                        | 68.4      | N/A         | N/A       |
| 1987 | 80.0        | 8.5       | 13.6           | 24.4      | 6.4                        | 67.1      | N/A         | N/A       |
| 1988 | 79.4        | 8.4       | 13.6           | 23.4      | 7.0                        | 68.2      | N/A         | N/A       |
| 1989 | 77.7        | 7.7       | 14.7           | 22.3      | 7.6                        | 70.0      | N/A         | N/A       |
| 1990 | 76.9        | 8.0       | 15.2           | 21.0      | 7.9                        | 71.0      | N/A         | N/A       |
| 1991 | 77.3        | 7.5       | 14.5           | 20.5      | 8.2                        | 72.0      | N/A         | N/A       |
| 1992 | 76.5        | 6.7       | 14.6           | 19.3      | 8.9                        | 74.0      | N/A         | N/A       |
| 1993 | 76.8        | 6.5       | 14.0           | 18.5      | 4.8                        | 18.5      | 4.4         | 56.5      |
| 1994 | 75.8        | 6.0       | 14.6           | 18.0      | 5.0                        | 19.0      | 4.6         | 57.0      |
| 1995 | 75.6        | 6.0       | 14.8           | 18.0      | 5.2                        | 20.0      | 4.4         | 56.0      |

<sup>1/</sup> Starting in 1993, class 500+ was broken out into classes 500-999 and 1,000+.

**CALIFORNIA BEEF COW OPERATIONS AND INVENTORY, PERCENTAGE BY SIZE GROUPS, 1989-95**

| Year | 1 - 99 Head    |           | 100-499 Head <sup>1/</sup> |           | 500+ Head  |           |
|------|----------------|-----------|----------------------------|-----------|------------|-----------|
|      | Operations     | Inventory | Operations                 | Inventory | Operations | Inventory |
|      | <i>Percent</i> |           |                            |           |            |           |
| 1989 | 86.7           | 25.0      | 13.3                       | 75.0      | N/A        | N/A       |
| 1990 | 87.2           | 25.0      | 12.8                       | 75.0      | N/A        | N/A       |
| 1991 | 87.6           | 28.0      | 12.4                       | 72.0      | N/A        | N/A       |
| 1992 | 86.7           | 25.0      | 13.3                       | 75.0      | N/A        | N/A       |
| 1993 | 86.0           | 24.0      | 12.0                       | 43.0      | 2.0        | 33.0      |
| 1994 | 86.0           | 24.0      | 12.0                       | 44.0      | 2.0        | 32.0      |
| 1995 | 86.3           | 24.0      | 11.9                       | 44.0      | 1.9        | 32.0      |

<sup>1/</sup> Classified as 100+ head for 1989-92.

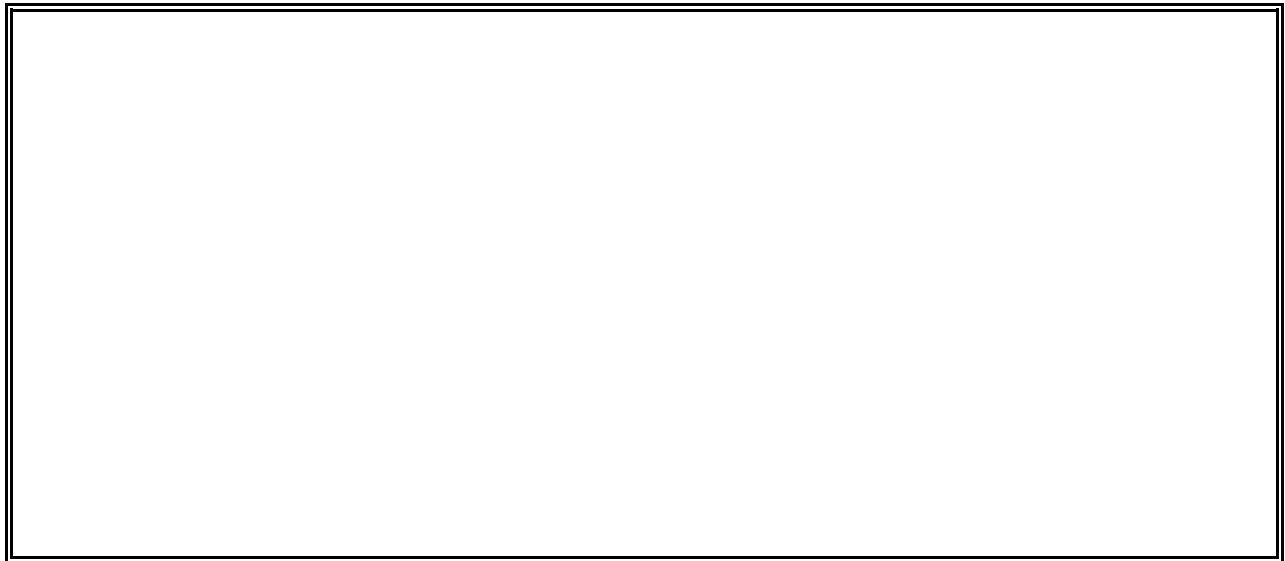

**CALIFORNIA CATTLE AND CALVES MARKETING FROM FEEDLOTS, 1986-95**

| Year | January-March     | April-June | July-September | October-December | Total |
|------|-------------------|------------|----------------|------------------|-------|
|      | <i>1,000 Head</i> |            |                |                  |       |
| 1986 | 203               | 190        | 220            | 226              | 839   |
| 1987 | 185               | 160        | 200            | 220              | 765   |
| 1988 | 205               | 200        | 210            | 235              | 850   |
| 1989 | 240               | 240        | 200            | 250              | 930   |
| 1990 | 220               | 185        | 190            | 220              | 815   |
| 1991 | 200               | 180        | 180            | 170              | 730   |
| 1992 | 180               | 165        | 140            | 155              | 640   |
| 1993 | 165               | 150        | 135            | 135              | 585   |
| 1994 | 130               | 150        | 145            | 155              | 580   |
| 1995 | 150               | 160        | 150            | 135              | 595   |



**CALIFORNIA CATTLE AND CALVES SLAUGHTERED  
UNDER FEDERAL AND STATE INSPECTION, 1986-95**

| Year              | Jan. | Feb. | Mar. | Apr. | May | June | July | Aug. | Sept. | Oct. | Nov. | Dec. | Annual<br>Total 1/ |
|-------------------|------|------|------|------|-----|------|------|------|-------|------|------|------|--------------------|
| <i>1,000 Head</i> |      |      |      |      |     |      |      |      |       |      |      |      |                    |
| <b>CATTLE</b>     |      |      |      |      |     |      |      |      |       |      |      |      |                    |
| 1986              | 131  | 104  | 112  | 127  | 136 | 134  | 145  | 133  | 128   | 135  | 109  | 126  | 1,521              |
| 1987              | 120  | 97   | 107  | 114  | 107 | 122  | 124  | 114  | 106   | 109  | 98   | 110  | 1,328              |
| 1988              | 105  | 100  | 110  | 100  | 102 | 108  | 103  | 111  | 94    | 95   | 93   | 95   | 1,215              |
| 1989              | 99   | 89   | 98   | 90   | 106 | 101  | 93   | 99   | 94    | 102  | 97   | 92   | 1,158              |
| 1990              | 105  | 90   | 101  | 97   | 109 | 104  | 100  | 105  | 86    | 97   | 91   | 87   | 1,172              |
| 1991              | 101  | 88   | 92   | 95   | 95  | 91   | 95   | 93   | 83    | 91   | 77   | 81   | 1,082              |
| 1992              | 87   | 71   | 77   | 72   | 71  | 80   | 75   | 70   | 74    | 77   | 68   | 77   | 899                |
| 1993              | 73   | 67   | 72   | 72   | 70  | 75   | 74   | 72   | 70    | 71   | 71   | 71   | 857                |
| 1994              | 70   | 62   | 73   | 69   | 74  | 80   | 74   | 80   | 75    | 79   | 83   | 82   | 901                |
| 1995              | 82   | 72   | 82   | 72   | 79  | 89   | 80   | 89   | 82    | 89   | 88   | 81   | 985                |
| <b>CALVES</b>     |      |      |      |      |     |      |      |      |       |      |      |      |                    |
| 1986              | 29   | 27   | 28   | 30   | 31  | 30   | 30   | 24   | 25    | 24   | 21   | 26   | 325                |
| 1987              | 26   | 24   | 28   | 23   | 22  | 24   | 24   | 22   | 21    | 18   | 19   | 21   | 272                |
| 1988              | 19   | 18   | 19   | 16   | 14  | 13   | 14   | 15   | 13    | 11   | 10   | 12   | 174                |
| 1989              | 13   | 11   | 11   | 8    | 9   | 9    | 9    | 10   | 9     | 8    | 7    | 8    | 112                |
| 1990              | 10   | 9    | 9    | 7    | 7   | 7    | 8    | 7    | 6     | 7    | 7    | 8    | 92                 |
| 1991              | 11   | 8    | 9    | 6    | 5   | 6    | 7    | 7    | 6     | 6    | 6    | 6    | 84                 |
| 1992              | 8    | 7    | 7    | 6    | 6   | 7    | 7    | 8    | 7     | 7    | 7    | 8    | 83                 |
| 1993              | 8    | 7    | 7    | 6    | 5   | 5    | 6    | 6    | 5     | 5    | 5    | 6    | 70                 |
| 1994              | 6    | 5    | 6    | 6    | 7   | 8    | 9    | 9    | 8     | 13   | 15   | 14   | 106                |
| 1995              | 16   | 12   | 14   | 14   | 21  | 21   | 19   | 19   | 16    | 13   | 15   | 18   | 196                |

1/ Totals may not equal sum of parts due to rounding.

**CALIFORNIA AVERAGE LIVE WEIGHTS OF CATTLE AND CALVES  
SLAUGHTERED UNDER FEDERAL AND STATE INSPECTIONS, 1986-95**

| Year          | Jan.  | Feb.  | Mar.  | Apr.  | May   | June  | July  | Aug.  | Sept. | Oct.  | Nov.  | Dec.  | Annual<br>Avg. |
|---------------|-------|-------|-------|-------|-------|-------|-------|-------|-------|-------|-------|-------|----------------|
| <i>Pounds</i> |       |       |       |       |       |       |       |       |       |       |       |       |                |
| <b>CATTLE</b> |       |       |       |       |       |       |       |       |       |       |       |       |                |
| 1986          | 1,125 | 1,129 | 1,129 | 1,112 | 1,102 | 1,103 | 1,130 | 1,113 | 1,134 | 1,140 | 1,145 | 1,135 | 1,124          |
| 1987          | 1,149 | 1,146 | 1,131 | 1,114 | 1,107 | 1,111 | 1,115 | 1,114 | 1,132 | 1,144 | 1,152 | 1,148 | 1,130          |
| 1988          | 1,156 | 1,168 | 1,166 | 1,161 | 1,159 | 1,148 | 1,145 | 1,160 | 1,147 | 1,164 | 1,169 | 1,171 | 1,159          |
| 1989          | 1,169 | 1,172 | 1,166 | 1,166 | 1,151 | 1,155 | 1,170 | 1,179 | 1,191 | 1,204 | 1,198 | 1,189 | 1,176          |
| 1990          | 1,202 | 1,207 | 1,216 | 1,188 | 1,195 | 1,180 | 1,174 | 1,187 | 1,204 | 1,216 | 1,222 | 1,229 | 1,201          |
| 1991          | 1,235 | 1,244 | 1,238 | 1,223 | 1,227 | 1,227 | 1,224 | 1,234 | 1,249 | 1,258 | 1,242 | 1,244 | 1,237          |
| 1992          | 1,260 | 1,253 | 1,244 | 1,236 | 1,234 | 1,232 | 1,228 | 1,224 | 1,234 | 1,243 | 1,251 | 1,251 | 1,241          |
| 1993          | 1,222 | 1,206 | 1,211 | 1,210 | 1,223 | 1,210 | 1,213 | 1,219 | 1,238 | 1,253 | 1,247 | 1,245 | 1,225          |
| 1994          | 1,264 | 1,261 | 1,232 | 1,245 | 1,235 | 1,213 | 1,215 | 1,213 | 1,206 | 1,224 | 1,223 | 1,236 | 1,230          |
| 1995          | 1,231 | 1,222 | 1,207 | 1,228 | 1,240 | 1,237 | 1,226 | 1,223 | 1,232 | 1,243 | 1,233 | 1,229 | 1,229          |
| <b>CALVES</b> |       |       |       |       |       |       |       |       |       |       |       |       |                |
| 1986          | 167   | 168   | 167   | 185   | 172   | 178   | 190   | 177   | 164   | 167   | 177   | 157   | 173            |
| 1987          | 169   | 161   | 166   | 175   | 182   | 183   | 174   | 171   | 189   | 185   | 191   | 197   | 177            |
| 1988          | 183   | 201   | 190   | 212   | 237   | 242   | 216   | 211   | 219   | 232   | 226   | 196   | 211            |
| 1989          | 197   | 203   | 199   | 204   | 197   | 218   | 213   | 225   | 235   | 245   | 229   | 213   | 213            |
| 1990          | 220   | 277   | 246   | 223   | 221   | 221   | 245   | 237   | 241   | 229   | 232   | 260   | 239            |
| 1991          | 252   | 273   | 287   | 285   | 291   | 311   | 326   | 322   | 301   | 280   | 305   | 292   | 291            |
| 1992          | 282   | 274   | 285   | 280   | 289   | 271   | 295   | 297   | 298   | 317   | 326   | 334   | 296            |
| 1993          | 314   | 334   | 345   | 345   | 342   | 351   | 369   | 351   | 335   | 362   | 377   | 360   | 349            |
| 1994          | 366   | 373   | 370   | 368   | 377   | 360   | 352   | 344   | 367   | 347   | 314   | 352   | 352            |
| 1995          | 400   | 320   | 377   | 332   | 296   | 290   | 322   | 326   | 338   | 338   | 370   | 364   | 337            |

**CALIFORNIA AVERAGE PRICES RECEIVED FOR  
BEEF CATTLE, STEERS AND HEIFERS, COWS AND CALVES, 1986-95**

| Year                           | Jan.  | Feb.  | Mar.  | Apr.  | May   | June   | July  | Aug.  | Sept. | Oct.  | Nov.  | Dec.  | Annual Average |
|--------------------------------|-------|-------|-------|-------|-------|--------|-------|-------|-------|-------|-------|-------|----------------|
| <i>Dollars Per Cwt.</i>        |       |       |       |       |       |        |       |       |       |       |       |       |                |
| <b>ALL BEEF CATTLE</b>         |       |       |       |       |       |        |       |       |       |       |       |       |                |
| 1986                           | 49.40 | 47.80 | 46.30 | 42.40 | 43.40 | 42.40  | 45.60 | 47.20 | 49.70 | 49.90 | 48.90 | 49.40 | 46.70          |
| 1987                           | 50.50 | 52.80 | 53.80 | 55.50 | 57.10 | 56.60  | 56.50 | 57.50 | 60.00 | 58.20 | 56.00 | 59.30 | 56.30          |
| 1988                           | 59.10 | 62.60 | 63.00 | 63.70 | 64.70 | 61.80  | 59.50 | 62.50 | 62.30 | 60.10 | 59.50 | 60.60 | 61.80          |
| 1989                           | 59.60 | 62.10 | 63.50 | 60.30 | 63.40 | 61.70  | 62.70 | 63.40 | 62.00 | 62.30 | 62.70 | 62.10 | 62.20          |
| 1990                           | 61.70 | 64.20 | 64.80 | 63.90 | 66.90 | 69.10  | 67.00 | 66.50 | 64.20 | 64.40 | 64.50 | 62.80 | 65.00          |
| 1991                           | 60.90 | 63.50 | 69.20 | 62.30 | 68.60 | 68.20  | 61.80 | 63.70 | 62.40 | 62.20 | 63.40 | 60.60 | 64.10          |
| 1992                           | 57.70 | 60.90 | 58.70 | 56.90 | 58.50 | 59.80  | 58.10 | 61.00 | 61.30 | 59.40 | 59.70 | 56.10 | 59.10          |
| 1993                           | 66.50 | 66.10 | 65.50 | 66.00 | 66.00 | 67.70  | 65.80 | 65.10 | 63.60 | 61.60 | 61.80 | 62.10 | 64.80          |
| 1994                           | 64.00 | 65.90 | 64.50 | 59.40 | 58.80 | 56.80  | 55.30 | 56.00 | 52.20 | 50.50 | 51.30 | 51.40 | 57.40          |
| 1995                           | 54.10 | 55.00 | 52.00 | 48.40 | 47.90 | 48.40  | 45.80 | 46.30 | 43.50 | 42.20 | 41.00 | 42.20 | 47.00          |
| <b>BEEF STEERS AND HEIFERS</b> |       |       |       |       |       |        |       |       |       |       |       |       |                |
| 1986                           | 58.30 | 56.10 | 55.30 | 51.50 | 50.20 | 48.30  | 52.50 | 54.30 | 56.00 | 56.80 | 56.80 | 57.80 | 54.30          |
| 1987                           | 56.90 | 60.50 | 61.20 | 64.20 | 66.40 | 65.80  | 63.90 | 65.50 | 67.70 | 67.50 | 64.90 | 67.30 | 64.50          |
| 1988                           | 66.70 | 69.00 | 70.10 | 72.50 | 73.90 | 70.10  | 67.50 | 70.60 | 71.20 | 70.60 | 72.00 | 70.80 | 70.40          |
| 1989                           | 73.20 | 74.00 | 75.30 | 72.80 | 74.00 | 73.20  | 74.20 | 75.00 | 71.50 | 73.00 | 74.80 | 73.80 | 73.70          |
| 1990                           | 75.00 | 77.40 | 76.50 | 78.20 | 78.40 | 80.50  | 75.40 | 77.00 | 74.00 | 74.20 | 74.30 | 76.70 | 76.40          |
| 1991                           | 75.70 | 76.20 | 81.70 | 77.40 | 80.50 | 76.50  | 73.40 | 75.00 | 73.90 | 77.40 | 74.10 | 71.40 | 76.30          |
| 1992                           | 75.60 | 77.90 | 73.50 | 70.80 | 71.30 | 72.90  | 74.20 | 75.20 | 75.10 | 75.70 | 77.10 | 77.70 | 74.50          |
| 1993                           | 81.00 | 79.00 | 79.20 | 78.70 | 79.40 | 83.00  | 81.00 | 79.50 | 79.00 | 78.50 | 76.50 | 78.50 | 79.40          |
| 1994                           | 80.00 | 79.80 | 78.30 | 71.50 | 69.70 | 68.00  | 66.70 | 66.20 | 62.60 | 61.50 | 63.20 | 64.30 | 69.20          |
| 1995                           | 68.80 | 66.20 | 62.30 | 57.90 | 57.20 | 57.30  | 55.00 | 54.60 | 51.80 | 51.00 | 51.50 | 53.00 | 57.00          |
| <b>BEEF COWS 1/</b>            |       |       |       |       |       |        |       |       |       |       |       |       |                |
| 1986                           | 34.60 | 36.40 | 36.70 | 31.60 | 33.00 | 33.60  | 34.80 | 36.60 | 37.50 | 36.80 | 36.10 | 36.90 | 35.30          |
| 1987                           | 40.00 | 42.50 | 44.30 | 44.20 | 43.40 | 43.40  | 44.00 | 44.80 | 46.20 | 45.00 | 44.60 | 45.70 | 44.00          |
| 1988                           | 46.40 | 48.10 | 48.20 | 47.90 | 48.10 | 45.50  | 45.70 | 47.00 | 47.60 | 45.50 | 44.80 | 44.50 | 46.70          |
| 1989                           | 44.70 | 47.60 | 48.40 | 46.60 | 46.20 | 46.10  | 45.80 | 47.80 | 49.20 | 47.50 | 45.90 | 47.20 | 46.90          |
| 1990                           | 48.90 | 51.70 | 52.80 | 51.80 | 51.90 | 51.90  | 54.60 | 52.90 | 50.80 | 47.50 | 45.60 | 47.30 | 50.60          |
| 1991                           | 47.20 | 50.40 | 49.10 | 48.70 | 52.00 | 49.80  | 47.30 | 48.60 | 48.60 | 46.50 | 44.00 | 44.80 | 48.20          |
| 1992                           | 46.70 | 47.10 | 46.30 | 46.40 | 45.10 | 46.70  | 45.80 | 46.60 | 44.30 | 43.70 | 44.70 | 44.50 | 45.70          |
| 1993                           | 46.20 | 46.90 | 46.50 | 46.70 | 46.00 | 46.50  | 46.40 | 45.20 | 44.30 | 43.30 | 43.50 | 42.50 | 45.40          |
| 1994                           | 43.70 | 46.00 | 45.40 | 44.60 | 43.10 | 40.00  | 40.30 | 41.30 | 38.50 | 36.40 | 34.80 | 35.00 | 41.10          |
| 1995                           | 35.50 | 38.80 | 37.80 | 35.80 | 33.90 | 35.50  | 33.70 | 34.40 | 32.40 | 31.00 | 27.00 | 29.00 | 33.50          |
| <b>CALVES</b>                  |       |       |       |       |       |        |       |       |       |       |       |       |                |
| 1986                           | 53.60 | 53.20 | 53.80 | 50.40 | 49.60 | 50.10  | 51.30 | 52.70 | 56.20 | 58.20 | 55.90 | 56.40 | 53.70          |
| 1987                           | 61.00 | 66.00 | 68.30 | 68.40 | 72.40 | 73.70  | 72.40 | 75.10 | 77.60 | 74.40 | 71.10 | 71.10 | 71.60          |
| 1988                           | 79.80 | 85.40 | 86.80 | 84.70 | 85.20 | 78.10  | 76.30 | 82.60 | 84.90 | 82.20 | 84.30 | 83.10 | 82.70          |
| 1989                           | 84.90 | 86.50 | 82.80 | 83.90 | 82.10 | 82.50  | 83.00 | 81.10 | 82.90 | 87.90 | 81.40 | 78.10 | 83.20          |
| 1990                           | 88.00 | 87.50 | 92.20 | 93.00 | 91.90 | 94.70  | 84.50 | 87.60 | 83.30 | 85.80 | 86.00 | 91.40 | 89.40          |
| 1991                           | 89.10 | 94.20 | 98.30 | 93.20 | 97.50 | 101.00 | 90.70 | 87.50 | 85.70 | 85.30 | 93.60 | 85.60 | 93.10          |
| 1992                           | 87.10 | 89.70 | 95.70 | 91.00 | 90.40 | 85.30  | 87.10 | 83.80 | 81.80 | 89.00 | 92.60 | 92.10 | 89.30          |
| 1993                           | 93.60 | 92.70 | 98.30 | 97.30 | 95.50 | 95.80  | 92.70 | 91.50 | 91.00 | 93.00 | 94.00 | 93.00 | 94.30          |
| 1994                           | 94.70 | 95.50 | 97.10 | 89.10 | 86.90 | 80.00  | 79.00 | 80.00 | 75.80 | 73.90 | 76.20 | 78.70 | 85.60          |
| 1995                           | 81.50 | 82.20 | 78.50 | 72.20 | 71.50 | 71.00  | 66.90 | 64.30 | 62.60 | 62.50 | 61.00 | 63.00 | 69.40          |

*1/ Beef cows sold for slaughter and herd replacement and cull dairy cows sold for slaughter.*

**CALIFORNIA MILK COWS, PRODUCTION AND PRICE, 1986-95**

| Year | Milk Cows & Heifers Calved |                     | Annual Production Per Milk Cow |          | Total Annual Production On Farms |          | Wholesale Milk Price |
|------|----------------------------|---------------------|--------------------------------|----------|----------------------------------|----------|----------------------|
|      | January 1                  | Average During Year | Milk                           | Milk Fat | Milk                             | Milk Fat |                      |
|      | 1,000 Head                 |                     | Pounds                         |          | Million Pounds                   |          | \$/Cwt.              |
| 1986 | 1,076                      | 1,070               | 16,095                         | 584      | 17,222                           | 625      | 11.77                |
| 1987 | 1,062                      | 1,061               | 16,897                         | 613      | 17,928                           | 651      | 11.43                |
| 1988 | 1,071                      | 1,083               | 17,181                         | 629      | 18,607                           | 681      | 10.94                |
| 1989 | 1,095                      | 1,104               | 17,591                         | 644      | 19,420                           | 711      | 12.37                |
| 1990 | 1,115                      | 1,135               | 18,456                         | 668      | 20,947                           | 758      | 12.02                |
| 1991 | 1,150                      | 1,155               | 18,534                         | 678      | 21,407                           | 784      | 11.22                |
| 1992 | 1,160                      | 1,180               | 18,722                         | 685      | 22,092                           | 809      | 11.61                |
| 1993 | 1,200                      | 1,210               | 18,948                         | 693      | 22,927                           | 839      | 11.45                |
| 1994 | 1,220                      | 1,235               | 20,439                         | 746      | 25,242                           | 921      | 11.52                |
| 1995 | 1,250                      | 1,254               | 20,197                         | 735      | 25,327                           | 922      | 11.68                |

**CALIFORNIA MILK COW OPERATIONS AND INVENTORY, PERCENTAGE BY SIZE GROUPS, 1986-95**

| Year | 1 - 49 Head |           | 50 - 99 Head |           | 100-199 Head <sup>1/</sup> |           | 200+ Head |           |
|------|-------------|-----------|--------------|-----------|----------------------------|-----------|-----------|-----------|
|      | Operation   | Inventory | Operation    | Inventory | Operation                  | Inventory | Operation | Inventory |
|      | Percent     |           |              |           |                            |           |           |           |
| 1986 | 58.7        | 1.0       | 6.7          | 2.7       | 34.6                       | 96.3      | N/A       | N/A       |
| 1987 | 55.0        | 0.9       | 7.0          | 2.8       | 38.0                       | 96.3      | N/A       | N/A       |
| 1988 | 49.8        | 0.8       | 7.7          | 2.6       | 42.5                       | 96.6      | N/A       | N/A       |
| 1989 | 47.7        | 0.8       | 7.6          | 2.4       | 44.7                       | 96.8      | N/A       | N/A       |
| 1990 | 45.3        | 0.6       | 8.0          | 2.0       | 46.7                       | 97.4      | N/A       | N/A       |
| 1991 | 40.9        | 0.6       | 6.7          | 1.6       | 52.4                       | 97.8      | N/A       | N/A       |
| 1992 | 40.9        | 0.6       | 6.7          | 1.7       | 52.4                       | 97.7      | N/A       | N/A       |
| 1993 | 43.0        | 0.6       | 4.5          | 1.2       | 7.5                        | 3.7       | 45.0      | 94.5      |
| 1994 | 39.5        | 0.6       | 4.4          | 1.1       | 8.9                        | 3.3       | 47.2      | 95.0      |
| 1995 | 31.6        | 0.4       | 4.5          | 0.9       | 9.4                        | 3.7       | 54.5      | 95.0      |

<sup>1/</sup> Starting in 1993, class 100+ was broken out into classes 100-199 and 200+.

**CALIFORNIA AVERAGE PRICES RECEIVED FOR MILK COWS, 1986-95 <sup>1/</sup>**

| Year | Jan.             | Apr.  | July  | Oct.  | Annual Average |
|------|------------------|-------|-------|-------|----------------|
|      | Dollars Per Head |       |       |       |                |
| 1986 | 1,000            | 965   | 1,020 | 1,010 | 1,000          |
| 1987 | 1,050            | 1,090 | 1,120 | 1,160 | 1,110          |
| 1988 | 1,170            | 1,210 | 1,180 | 1,170 | 1,180          |
| 1989 | 1,210            | 1,200 | 1,190 | 1,210 | 1,200          |
| 1990 | 1,280            | 1,260 | 1,320 | 1,360 | 1,310          |
| 1991 | 1,240            | 1,200 | 1,200 | 1,250 | 1,220          |
| 1992 | 1,260            | 1,280 | 1,320 | 1,310 | 1,290          |
| 1993 | 1,270            | 1,320 | 1,320 | 1,330 | 1,310          |
| 1994 | 1,340            | 1,320 | 1,230 | 1,290 | 1,300          |
| 1995 | 1,270            | 1,230 | 1,230 | 1,190 | 1,230          |

<sup>1/</sup> For dairy herd replacement.

# CALIFORNIA MANUFACTURED DAIRY PRODUCTS

| Commodity                                | 1993                | 1994    | 1995    |
|------------------------------------------|---------------------|---------|---------|
|                                          | <i>1,000 Pounds</i> |         |         |
| Butter                                   | 333,468             | 344,657 | 342,765 |
| All Cheese Total                         | 848,436             | 922,887 | 921,461 |
| American Cheese Total                    | 334,445             | 351,149 | 345,952 |
| Cheddar                                  | 240,810             | 259,626 | 250,058 |
| Monterey, Jack and Other                 | 93,635              | 91,523  | 95,894  |
| Italian Cheese Total                     | 448,552             | 499,087 | 503,318 |
| Mozzarella                               | 404,679             | 450,837 | 443,648 |
| Other Italian                            | 43,873              | 48,250  | 59,670  |
| All Other Cheese                         | 65,439              | 72,651  | 72,191  |
| Cream Cheese                             | 20,157              | N/A     | N/A     |
| Creamed and Low Fat Cottage Cheese Total | 90,426              | 92,290  | 74,475  |
| Creamed                                  | 34,688              | 32,746  | 26,474  |
| Low Fat                                  | 55,738              | 59,544  | 48,001  |
| Curd Cottage Cheese Total                | 59,977              | 61,072  | 47,031  |
| Yogurt, Plain and Flavored               | 284,944             | 286,766 | 251,651 |
| Milk, Nonfat Dry                         | 415,496             | 429,761 | 442,466 |
| Milk, Unsweetened Condensed Skim         | 484,182             | 525,493 | 516,518 |
| <i>1,000 Gallons</i>                     |                     |         |         |
| Ice Cream                                | 109,453             | 111,194 | 110,069 |
| Lowfat Ice Cream Total <sup>1/</sup>     | 36,159              | 33,328  | 32,926  |
| Hard                                     | 13,875              | 16,344  | 18,172  |
| Soft                                     | 22,284              | 16,984  | 14,754  |
| Milk Sherbet                             | 5,610               | 5,076   | 6,665   |
| Water Ices                               | 4,093               | 5,516   | 4,318   |

<sup>1/</sup> Previously referred to as Ice Milk.

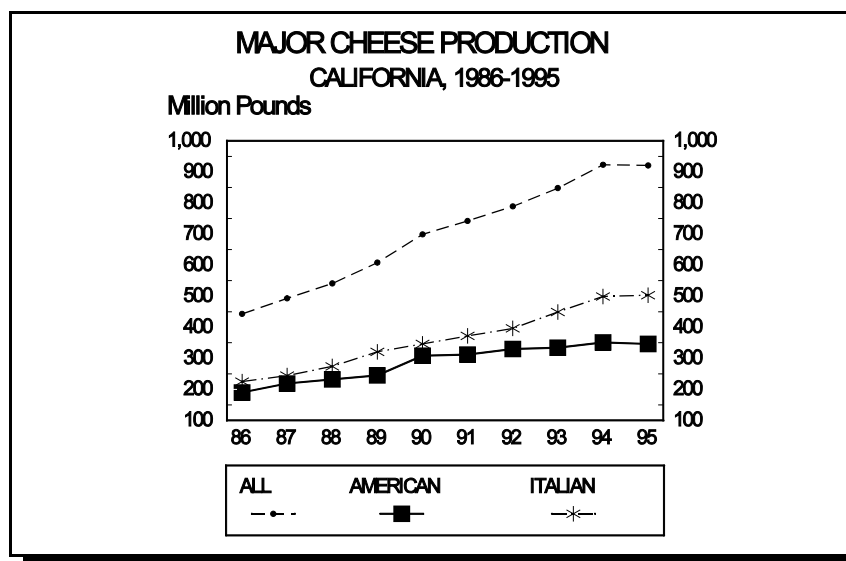

# CALIFORNIA SHEEP AND LAMBS BY CLASS, JANUARY 1, 1987-96

| Year | All Sheep 1/ | Sheep & Lambs On Feed For Market 1/ | Stock Sheep |              |                   |                        |
|------|--------------|-------------------------------------|-------------|--------------|-------------------|------------------------|
|      |              |                                     | Total       | Ewes 1 Yr. + | Replacement Lambs | Wethers & Rams 1 Yr. + |
|      |              |                                     | 1,000 Head  |              |                   |                        |
| 1987 | 980          | 185                                 | 795         | 685          | 85                | 25                     |
| 1988 | 970          | 170                                 | 800         | 685          | 90                | 25                     |
| 1989 | 940          | 160                                 | 780         | 632          | 124               | 24                     |
| 1990 | 1,000        | 225                                 | 775         | 620          | 129               | 26                     |
| 1991 | 1,015        | 280                                 | 735         | 576          | 132               | 27                     |
| 1992 | 995          | 285                                 | 710         | 562          | 125               | 23                     |
| 1993 | 895          | 305                                 | 590         | 450          | 117               | 23                     |
| 1994 | 1,120        | 600                                 | 520         | 400          | 100               | 20                     |
| 1995 | 1,060        | 520                                 | 540         | 430          | 90                | 20                     |
| 1996 | 1,000        | 520                                 | 480         | 390          | 75                | 15                     |

1/ Beginning in 1994, totals include new crop lambs.

## CALIFORNIA SHEEP INVENTORY JANUARY 1, 1987-1996

Thousand Head

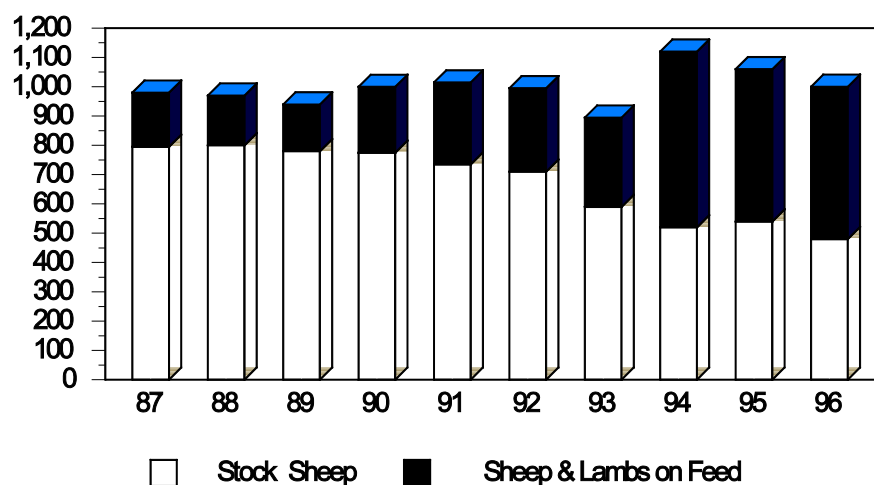

Note: Starting in 1994, new crop lambs were included in Sheep & Lambs on Feed.

**CALIFORNIA SHEEP AND LAMBS INVENTORY, SUPPLY AND DISPOSITION, 1986-95**

| Year | Beginning Inventory | Lamb Crop | Inshipment s | Marketings 1/ |       | Farm Slaughter Sheep & Lambs | Deaths |       | Ending Inventory |
|------|---------------------|-----------|--------------|---------------|-------|------------------------------|--------|-------|------------------|
|      | January 1 2/        |           |              | Sheep         | Lambs |                              | Sheep  | Lambs |                  |
|      | 1,000 Head          |           |              |               |       |                              |        |       |                  |
| 1986 | 1,065               | 630       | 198          | 111           | 685   | 24                           | 43     | 50    | 980              |
| 1987 | 980                 | 625       | 298          | 43            | 797   | 13                           | 30     | 50    | 970              |
| 1988 | 970                 | 590       | 213          | 75            | 673   | 10                           | 37     | 38    | 940              |
| 1989 | 940                 | 550       | 268          | 97            | 580   | 8                            | 37     | 36    | 1,000            |
| 1990 | 1,000               | 535       | 260          | 144           | 566   | 8                            | 32     | 30    | 1,015            |
| 1991 | 1,015               | 520       | 248          | 130           | 583   | 7                            | 34     | 34    | 995              |
| 1992 | 995                 | 530       | 285          | 217           | 624   | 8                            | 34     | 32    | 895              |
| 1993 | 895                 | 390       | 469          | 139           | 718   | 5                            | 25     | 27    | 840              |
| 1994 | 1,120               | 365       | 370          | 85            | 656   | 6                            | 24     | 24    | 1,060            |
| 1995 | 1,060               | 380       | 380          | 120           | 649   | 5                            | 29     | 17    | 1,000            |

1/ Includes custom slaughter for use on farms where produced, but excludes interfarm sales within the State.

2/ Beginning in 1994, totals include new crop lambs.

**CALIFORNIA SHEEP AND LAMBS SHORN, WOOL PRODUCTION AND VALUE, 1986-95**

| Year | Sheep and<br>Lambs Shorn | Wool Produced |                     | Wool Value<br>Per Pound | Total Wool Value |
|------|--------------------------|---------------|---------------------|-------------------------|------------------|
|      |                          | Per Animal    | Total               |                         |                  |
|      | <i>1,000 Head</i>        | <i>Pounds</i> | <i>1,000 Pounds</i> | <i>Dollars</i>          | <i>\$1,000</i>   |
| 1986 | 1,088                    | 7.6           | 8,229               | 0.660                   | 5,431            |
| 1987 | 1,020                    | 7.1           | 7,241               | 0.870                   | 6,300            |
| 1988 | 955                      | 7.4           | 7,103               | 1.430                   | 10,157           |
| 1989 | 990                      | 7.7           | 7,624               | 1.370                   | 10,445           |
| 1990 | 1,015                    | 7.5           | 7,646               | 0.820                   | 6,270            |
| 1991 | 930                      | 7.7           | 7,160               | 0.560                   | 4,010            |
| 1992 | 880                      | 7.7           | 6,780               | 0.670                   | 4,543            |
| 1993 | 800                      | 7.6           | 6,044               | 0.460                   | 2,780            |
| 1994 | 695                      | 7.7           | 5,318               | 0.650                   | 3,457            |
| 1995 | 690                      | 7.6           | 5,250               | 1.020                   | 5,355            |

**CALIFORNIA SHEEP AND LAMBS AVERAGE PRICES RECEIVED, 1986-95**

| Year                    | Jan.  | Feb.  | Mar.  | Apr.  | May   | June  | July  | Aug.  | Sept. | Oct.  | Nov.  | Dec.  | Annual Avg. 1/ |
|-------------------------|-------|-------|-------|-------|-------|-------|-------|-------|-------|-------|-------|-------|----------------|
| <i>Dollars Per Cwt.</i> |       |       |       |       |       |       |       |       |       |       |       |       |                |
| <b>SHEEP</b>            |       |       |       |       |       |       |       |       |       |       |       |       |                |
| 1986                    | 30.00 | 24.70 | 23.60 | 22.20 | 19.20 | 23.60 | 24.90 | 23.30 | 22.90 | 22.30 | 21.10 | 23.40 | 23.20          |
| 1987                    | 24.30 | 25.40 | 25.30 | 24.40 | 22.40 | 21.90 | 24.10 | 26.10 | 24.70 | 25.80 | 29.60 | 32.70 | 25.10          |
| 1988                    | 34.40 | 27.70 | 30.60 | 21.50 | 19.20 | 20.40 | 27.60 | 21.40 | 19.70 | 19.30 | 19.00 | 20.90 | 23.60          |
| 1989                    | 30.50 | 27.20 | 30.50 | 22.20 | 17.80 | 18.90 | 19.00 | 20.10 | 20.20 | 17.50 | 19.90 | 26.10 | 21.10          |
| 1990                    | 26.20 | 27.30 | 27.10 | 21.50 | 16.90 | 14.40 | 19.30 | 18.50 | 17.70 | 15.70 | 25.20 | 22.60 | 18.90          |
| 1991                    | 20.50 | 17.30 | 18.90 | 22.00 | 18.00 | 15.20 | 20.40 | 17.10 | 20.70 | 20.20 | 20.40 | 22.60 | 17.90          |
| 1992                    | 27.00 | 26.60 | 29.20 | 27.30 | 20.40 | 19.70 | 20.70 | 20.90 | 21.60 | 22.80 | 28.00 | 30.60 | 22.50          |
| 1993                    | 30.00 | 31.10 | 32.00 | 29.00 | 26.00 | 24.50 | 24.00 | 26.00 | 25.00 | 23.00 | 24.00 | 27.50 | 25.80          |
| 1994                    | 32.20 | 32.70 | 31.50 | 29.10 | 27.10 | 29.10 | 24.30 | 30.80 | 29.00 | 27.70 | 26.70 | 35.80 | 29.10          |
| 1995                    | 29.90 | 34.70 | 28.60 | 26.10 | 22.40 | 24.00 | 25.10 | 24.00 | 24.00 | 23.70 | 22.00 | 27.00 | 24.80          |
| <b>LAMBS</b>            |       |       |       |       |       |       |       |       |       |       |       |       |                |
| 1986                    | 64.30 | 65.00 | 64.30 | 65.10 | 72.80 | 74.00 | 71.60 | 70.30 | 66.80 | 64.50 | 75.80 | 72.50 | 68.60          |
| 1987                    | 73.50 | 73.80 | 76.00 | 80.00 | 85.60 | 84.10 | 78.20 | 76.50 | 71.90 | 63.30 | 59.90 | 67.00 | 74.90          |
| 1988                    | 75.70 | 82.50 | 74.60 | 81.00 | 77.30 | 51.30 | 57.30 | 58.10 | 61.80 | 63.80 | 65.50 | 67.10 | 70.30          |
| 1989                    | 67.10 | 67.40 | 67.40 | 75.80 | 74.40 | 72.70 | 70.40 | 67.30 | 68.20 | 64.80 | 67.30 | 67.80 | 69.30          |
| 1990                    | 68.00 | 63.80 | 68.40 | 63.30 | 61.10 | 58.80 | 58.90 | 56.30 | 57.30 | 54.90 | 53.30 | 51.10 | 60.10          |
| 1991                    | 51.90 | 47.10 | 51.70 | 55.30 | 59.70 | 53.50 | 58.10 | 54.10 | 55.20 | 52.10 | 53.30 | 53.80 | 53.80          |
| 1992                    | 56.40 | 58.40 | 64.10 | 71.80 | 72.00 | 66.20 | 65.70 | 57.20 | 59.40 | 57.20 | 59.50 | 65.40 | 62.90          |
| 1993                    | 65.10 | 71.70 | 74.50 | 71.00 | 66.00 | 62.00 | 60.00 | 59.00 | 63.00 | 62.50 | 64.50 | 65.50 | 65.70          |
| 1994                    | 60.90 | 58.80 | 58.30 | 55.30 | 54.40 | 61.90 | 71.50 | 76.00 | 74.80 | 73.80 | 72.70 | 76.70 | 65.60          |
| 1995                    | 69.60 | 71.00 | 76.70 | 77.00 | 78.70 | 84.00 | 86.00 | 86.50 | 83.00 | 80.00 | 78.00 | 78.50 | 79.20          |

1/ Average weighted by amount sold each month.

**CALIFORNIA SHEEP AND LAMBS SLAUGHTERED  
UNDER FEDERAL AND STATE INSPECTION, 1986-95**

| Year              | Jan. | Feb. | Mar. | Apr. | May | June | July | Aug.      | Sept. | Oct. | Nov. | Dec. | Annual<br>Total |
|-------------------|------|------|------|------|-----|------|------|-----------|-------|------|------|------|-----------------|
| <i>1,000 Head</i> |      |      |      |      |     |      |      |           |       |      |      |      |                 |
| 1986              | 75   | 77   | 95   | 100  | 84  | 66   | 72   | 74        | 74    | 60   | 46   | 55   | 877             |
| 1987              | 64   | 75   | 69   | 80   | 70  | 73   | 83   | 72        | 81    | 76   | 66   | 74   | 883             |
| 1988              | 66   | 75   | 86   | 69   | 69  | 71   | 66   | 70        | 59    | 54   | 55   | 46   | 785             |
| 1989              | 52   | 61   | 70   | 50   | 57  | 49   | 51   | 64        | 55    | 53   | 55   | 53   | 670             |
| 1990              | 55   | 61   | 69   | 55   | 68  | 63   | 58   | <i>a/</i> | ---   | ---  | ---  | ---  | ---             |
| 1991              | ---  | ---  | ---  | ---  | --- | ---  | ---  | ---       | ---   | ---  | ---  | ---  | ---             |
| 1992              | ---  | ---  | ---  | ---  | --- | ---  | ---  | ---       | ---   | ---  | ---  | ---  | ---             |
| 1993              | ---  | ---  | ---  | ---  | --- | ---  | ---  | ---       | ---   | ---  | ---  | ---  | ---             |
| 1994              | ---  | ---  | ---  | ---  | --- | ---  | ---  | ---       | ---   | ---  | ---  | ---  | ---             |
| 1995              | ---  | ---  | ---  | ---  | --- | ---  | ---  | ---       | ---   | ---  | ---  | ---  | ---             |

*a/ Information not published after July 1990 to avoid disclosing individual operations.*

**CALIFORNIA AVERAGE LIVE WEIGHTS OF SHEEP AND LAMBS  
SLAUGHTERED UNDER FEDERAL AND STATE INSPECTIONS, 1986-95**

| Year          | Jan. | Feb. | Mar. | Apr. | May | June | July | Aug.      | Sept. | Oct. | Nov. | Dec. | Annual<br>Avg. |
|---------------|------|------|------|------|-----|------|------|-----------|-------|------|------|------|----------------|
| <i>Pounds</i> |      |      |      |      |     |      |      |           |       |      |      |      |                |
| 1986          | 119  | 123  | 122  | 117  | 116 | 112  | 112  | 116       | 117   | 119  | 116  | 120  | 117            |
| 1987          | 118  | 128  | 129  | 122  | 119 | 118  | 122  | 124       | 126   | 126  | 125  | 127  | 124            |
| 1988          | 127  | 131  | 133  | 129  | 127 | 124  | 128  | 120       | 121   | 121  | 118  | 124  | 126            |
| 1989          | 124  | 123  | 153  | 125  | 123 | 118  | 123  | 118       | 122   | 122  | 122  | 123  | 125            |
| 1990          | 123  | 131  | 128  | 126  | 126 | 124  | 119  | <i>a/</i> | ---   | ---  | ---  | ---  | ---            |
| 1991          | ---  | ---  | ---  | ---  | --- | ---  | ---  | ---       | ---   | ---  | ---  | ---  | ---            |
| 1992          | ---  | ---  | ---  | ---  | --- | ---  | ---  | ---       | ---   | ---  | ---  | ---  | ---            |
| 1993          | ---  | ---  | ---  | ---  | --- | ---  | ---  | ---       | ---   | ---  | ---  | ---  | ---            |
| 1994          | ---  | ---  | ---  | ---  | --- | ---  | ---  | ---       | ---   | ---  | ---  | ---  | ---            |
| 1995          | ---  | ---  | ---  | ---  | --- | ---  | ---  | ---       | ---   | ---  | ---  | ---  | ---            |

*a/ Information not published after July 1990 to avoid disclosing individual operations.*

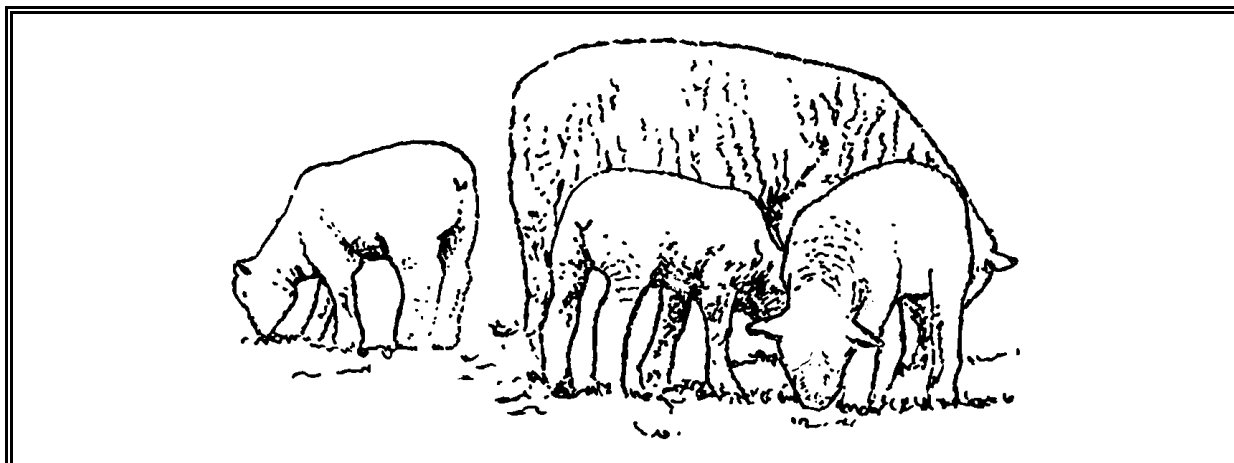

**CALIFORNIA HOGS AND PIGS BY CLASS, DECEMBER 1, 1986-95**

| Year | Total<br>Hogs & Pigs | Breeding<br>Hogs & Pigs | Market Hogs        |                  |                   |                      |       |
|------|----------------------|-------------------------|--------------------|------------------|-------------------|----------------------|-------|
|      |                      |                         | Under<br>60 Pounds | 60-119<br>Pounds | 120-179<br>Pounds | 180 Pounds<br>& Over | Total |
|      |                      |                         | <i>1,000 Head</i>  |                  |                   |                      |       |
| 1986 | 150                  | 27                      | 53                 | 31               | 21                | 18                   | 123   |
| 1987 | 140                  | 25                      | 49                 | 28               | 21                | 17                   | 115   |
| 1988 | 130                  | 23                      | 45                 | 28               | 19                | 15                   | 107   |
| 1989 | 140                  | 23                      | 42                 | 40               | 19                | 16                   | 117   |
| 1990 | 195                  | 28                      | 60                 | 49               | 31                | 27                   | 167   |
| 1991 | 215                  | 29                      | 64                 | 51               | 40                | 31                   | 186   |
| 1992 | 265                  | 37                      | 82                 | 58               | 45                | 43                   | 228   |
| 1993 | 260                  | 33                      | 74                 | 60               | 49                | 44                   | 227   |
| 1994 | 255                  | 32                      | 70                 | 65               | 45                | 43                   | 223   |
| 1995 | 240                  | 31                      | 65                 | 58               | 44                | 42                   | 209   |

**CALIFORNIA SOWS FARROWED AND PIGS SAVED, 1986-95**

| Year | December - May    |            |                 | June - November   |            |                 |
|------|-------------------|------------|-----------------|-------------------|------------|-----------------|
|      | Sows Farrowed     | Pigs Saved | Pigs Per Litter | Sows Farrowed     | Pigs Saved | Pigs Per Litter |
|      | <i>1,000 Head</i> |            | <i>Number</i>   | <i>1,000 Head</i> |            | <i>Number</i>   |
| 1986 | 18                | 133        | 7.4             | 17                | 131        | 7.7             |
| 1987 | 17                | 131        | 7.7             | 17                | 131        | 7.7             |
| 1988 | 18                | 133        | 7.4             | 16                | 119        | 7.4             |
| 1989 | 15                | 112        | 7.5             | 16                | 120        | 7.5             |
| 1990 | 22                | 167        | 7.6             | 24                | 191        | 8.0             |
| 1991 | 23                | 188        | 8.2             | 25                | 199        | 8.0             |
| 1992 | 24                | 202        | 8.4             | 28                | 221        | 7.9             |
| 1993 | 29                | 238        | 8.2             | 29                | 246        | 8.5             |
| 1994 | 28                | 242        | 8.6             | 25                | 221        | 8.8             |
| 1995 | 25                | 223        | 8.9             | 23                | 199        | 8.7             |

**CALIFORNIA HOGS AND PIGS INVENTORY, SUPPLY AND DISPOSITION, 1986-95**

| Year | Beginning<br>Inventory Dec.<br>1 (Prev. Yr.) | Pig Crop |           | Inshipment<br>s<br>1/ | Marketings<br>2/ | Farm<br>Slaughter<br>3/ | Deaths | Ending<br>Inventory<br>December 1 |
|------|----------------------------------------------|----------|-----------|-----------------------|------------------|-------------------------|--------|-----------------------------------|
|      |                                              | Dec.-May | June-Nov. |                       |                  |                         |        |                                   |
|      | 1,000 Head                                   |          |           |                       |                  |                         |        |                                   |
| 1986 | 145                                          | 133      | 131       | 21                    | 250              | 14                      | 16     | 150                               |
| 1987 | 150                                          | 131      | 131       | 20                    | 262              | 14                      | 16     | 140                               |
| 1988 | 140                                          | 133      | 119       | 32                    | 258              | 18                      | 18     | 130                               |
| 1989 | 130                                          | 112      | 120       | 32                    | 224              | 15                      | 15     | 140                               |
| 1990 | 140                                          | 167      | 191       | 44                    | 310              | 20                      | 17     | 195                               |
| 1991 | 195                                          | 188      | 199       | 31                    | 357              | 22                      | 19     | 215                               |
| 1992 | 215                                          | 202      | 221       | 55                    | 398              | 15                      | 30     | 265                               |
| 1993 | 265                                          | 238      | 246       | 40                    | 462              | 25                      | 42     | 260                               |
| 1994 | 260                                          | 242      | 221       | 40                    | 448              | 21                      | 39     | 255                               |
| 1995 | 255                                          | 223      | 199       | 40                    | 413              | 24                      | 40     | 240                               |

1/ For feeding or breeding, excludes stock brought in for immediate slaughter.

2/ Includes custom slaughter for use on farms where produced and State outshipments, but excludes interfarm sales.

3/ Excludes custom slaughter for farmers at commercial establishments.



**CALIFORNIA HOGS AND PIGS SLAUGHTERED  
UNDER FEDERAL AND STATE INSPECTION, 1986-95**

| Year              | Jan. | Feb. | Mar. | Apr. | May | June | July | Aug. | Sept. | Oct. | Nov. | Dec. | Annual<br>Total 1/ |
|-------------------|------|------|------|------|-----|------|------|------|-------|------|------|------|--------------------|
| <i>1,000 Head</i> |      |      |      |      |     |      |      |      |       |      |      |      |                    |
| 1986              | 158  | 135  | 154  | 162  | 152 | 148  | 153  | 106  | 127   | 161  | 127  | 152  | 1,734              |
| 1987              | 150  | 134  | 149  | 148  | 142 | 147  | 146  | 139  | 158   | 163  | 157  | 183  | 1,816              |
| 1988              | 170  | 173  | 187  | 164  | 164 | 173  | 161  | 199  | 190   | 185  | 184  | 188  | 2,137              |
| 1989              | 195  | 165  | 200  | 170  | 189 | 184  | 165  | 194  | 179   | 179  | 169  | 171  | 2,159              |
| 1990              | 179  | 151  | 167  | 157  | 169 | 133  | 137  | 164  | 138   | 159  | 150  | 153  | 1,859              |
| 1991              | 159  | 144  | 148  | 151  | 155 | 142  | 155  | 164  | 152   | 164  | 155  | 162  | 1,850              |
| 1992              | 169  | 145  | 166  | 157  | 151 | 160  | 158  | 152  | 160   | 167  | 141  | 161  | 1,888              |
| 1993              | 145  | 141  | 151  | 150  | 145 | 163  | 155  | 162  | 160   | 165  | 155  | 163  | 1,856              |
| 1994              | 163  | 160  | 159  | 156  | 151 | 164  | 146  | 166  | 168   | 158  | 156  | 177  | 1,924              |
| 1995              | 169  | 141  | 176  | 152  | 177 | 164  | 155  | 175  | 157   | 164  | 163  | 171  | 1,964              |

1/ Totals may not equal sum of parts due to rounding.

**CALIFORNIA AVERAGE LIVE WEIGHTS OF HOGS AND PIGS  
SLAUGHTERED UNDER FEDERAL AND STATE INSPECTIONS, 1986-95**

| Year          | Jan. | Feb. | Mar. | Apr. | May | June | July | Aug. | Sept. | Oct. | Nov. | Dec. | Annual<br>Avg. |
|---------------|------|------|------|------|-----|------|------|------|-------|------|------|------|----------------|
| <i>Pounds</i> |      |      |      |      |     |      |      |      |       |      |      |      |                |
| 1986          | 228  | 224  | 227  | 227  | 227 | 220  | 219  | 218  | 218   | 221  | 218  | 225  | 223            |
| 1987          | 226  | 226  | 226  | 225  | 226 | 225  | 222  | 222  | 223   | 228  | 229  | 227  | 225            |
| 1988          | 228  | 227  | 226  | 226  | 228 | 226  | 227  | 223  | 224   | 231  | 230  | 229  | 227            |
| 1989          | 225  | 223  | 226  | 227  | 227 | 224  | 221  | 222  | 219   | 224  | 224  | 222  | 224            |
| 1990          | 219  | 221  | 223  | 222  | 224 | 220  | 218  | 219  | 221   | 222  | 224  | 223  | 221            |
| 1991          | 223  | 219  | 224  | 223  | 222 | 220  | 220  | 219  | 222   | 224  | 226  | 224  | 222            |
| 1992          | 229  | 221  | 227  | 232  | 223 | 226  | 220  | 221  | 221   | 225  | 228  | 220  | 224            |
| 1993          | 222  | 229  | 223  | 222  | 228 | 224  | 226  | 221  | 221   | 224  | 225  | 223  | 224            |
| 1994          | 223  | 222  | 219  | 227  | 221 | 227  | 217  | 217  | 216   | 224  | 224  | 229  | 222            |
| 1995          | 225  | 224  | 235  | 238  | 241 | 231  | 224  | 223  | 215   | 219  | 224  | 218  | 227            |

**CALIFORNIA MARKET HOG INVENTORY  
DECEMBER 1, 1986-1995**

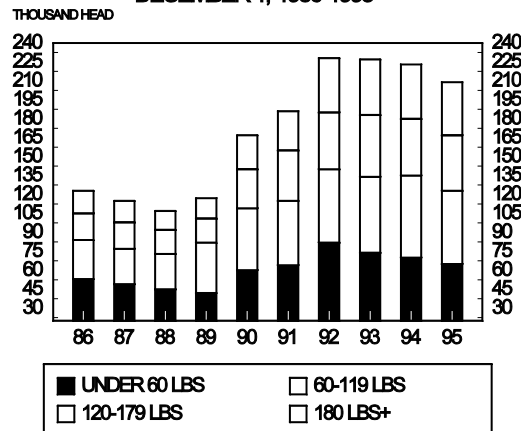

**CALIFORNIA HENS AND PULLETS OF LAYING AGE (HPLA), AND EGG PRODUCTION, 1994-95**

| Month              | Average Number of HPLA |        |                     | Eggs Per 100 Layers |       |                     | Total Egg Production |       |                     |
|--------------------|------------------------|--------|---------------------|---------------------|-------|---------------------|----------------------|-------|---------------------|
|                    | 1994                   | 1995   | <u>1995</u><br>1994 | 1994                | 1995  | <u>1995</u><br>1994 | 1994                 | 1995  | <u>1995</u><br>1994 |
|                    | Thousands              |        | Percent             | Number              |       | Percent             | Millions             |       | Percent             |
| December <u>1/</u> | 27,196                 | 27,859 | 101                 | 2,173               | 2,164 | 100                 | 591                  | 592   | 100                 |
| January            | 26,363                 | 26,565 | 101                 | 2,090               | 2,108 | 101                 | 551                  | 560   | 102                 |
| February           | 25,619                 | 26,100 | 102                 | 1,913               | 1,893 | 99                  | 490                  | 494   | 101                 |
| March              | 25,751                 | 26,073 | 101                 | 2,225               | 2,178 | 98                  | 573                  | 568   | 99                  |
| April              | 25,851                 | 25,536 | 99                  | 2,097               | 2,091 | 100                 | 542                  | 534   | 99                  |
| May                | 25,900                 | 24,893 | 96                  | 2,127               | 2,141 | 101                 | 551                  | 533   | 97                  |
| June               | 25,600                 | 24,145 | 94                  | 2,094               | 2,096 | 100                 | 536                  | 506   | 94                  |
| July               | 25,222                 | 23,581 | 93                  | 2,165               | 2,192 | 101                 | 546                  | 517   | 95                  |
| August             | 25,477                 | 23,900 | 94                  | 2,178               | 2,184 | 100                 | 555                  | 522   | 94                  |
| September          | 25,757                 | 24,638 | 96                  | 2,069               | 2,102 | 102                 | 533                  | 518   | 97                  |
| October            | 26,211                 | 25,348 | 97                  | 2,156               | 2,174 | 101                 | 565                  | 551   | 98                  |
| November           | 26,967                 | 25,636 | 95                  | 2,110               | 2,142 | 102                 | 569                  | 549   | 96                  |
| Avg./Total         | 25,995                 | 25,312 | 97                  | 2,116               | 2,122 | 100                 | 6,602                | 6,444 | 98                  |

1/ December of previous year.

**CALIFORNIA EGG PRODUCTION AND VALUE, 1986-95**

| Year | Eggs Produced | Price Per Dozen | Value of Production |
|------|---------------|-----------------|---------------------|
|      | Millions      | Cents           | \$1,000             |
| 1986 | 7,850         | 53.1            | 347,362             |
| 1987 | 8,023         | 46.0            | 307,548             |
| 1988 | 7,917         | 46.2            | 304,805             |
| 1989 | 7,579         | 65.9            | 416,213             |
| 1990 | 7,711         | 63.3            | 406,755             |
| 1991 | 7,721         | 58.4            | 375,755             |
| 1992 | 7,224         | 47.6            | 286,552             |
| 1993 | 7,029         | 49.1            | 287,603             |
| 1994 | 6,602         | 46.4            | 255,277             |
| 1995 | 6,444         | 53.7            | 288,869             |

**CALIFORNIA BROILER PRODUCTION AND VALUE, 1986-95**

| Year | Number Produced | Average Live Weight | Pounds Produced | Price Per Pound <u>1/</u> | Value of Production <u>2/</u> |
|------|-----------------|---------------------|-----------------|---------------------------|-------------------------------|
|      | 1,000 Head      | Pounds              | 1,000 Pounds    | Cents                     | \$1,000                       |
| 1986 | 184,832         | 4.7                 | 868,710         | 36.0                      | 312,736                       |
| 1987 | 196,120         | 4.7                 | 921,764         | 37.0                      | 341,053                       |
| 1988 | 212,199         | 4.7                 | 997,335         | 34.0                      | 339,094                       |
| 1989 | 223,130         | 4.7                 | 1,048,711       | 34.5                      | 361,805                       |
| 1990 | 231,100         | 4.8                 | 1,109,280       | 30.5                      | 338,330                       |
| 1991 | 240,200         | 4.8                 | 1,152,960       | 29.0                      | 334,358                       |
| 1992 | 233,000         | 5.1                 | 1,188,300       | 29.5                      | 350,549                       |
| 1993 | 216,000         | 5.1                 | 1,101,600       | 32.0                      | 352,512                       |
| 1994 | 226,200         | 5.0                 | 1,131,000       | 33.0                      | 373,230                       |
| 1995 | 235,800         | 5.0                 | 1,179,000       | 32.5                      | 383,175                       |

1/ Live weight equivalent price.

2/ Gross income including home consumption.

**CALIFORNIA TURKEY PRODUCTION AND VALUE, 1986-95**

| Year | Number Raised     | Pounds Produced <sup>1/</sup> | Price Per Pound <sup>2/</sup> | Value of Production |
|------|-------------------|-------------------------------|-------------------------------|---------------------|
|      | <i>1,000 Head</i> | <i>1,000 Pounds</i>           | <i>Cents</i>                  | <i>\$1,000</i>      |
| 1986 | 21,900            | 464,280                       | 45.0                          | 208,926             |
| 1987 | 25,500            | 545,700                       | 33.0                          | 180,081             |
| 1988 | 26,500            | 572,400                       | 35.0                          | 200,340             |
| 1989 | 30,200            | 664,400                       | 38.0                          | 252,472             |
| 1990 | 31,500            | 711,900                       | 38.0                          | 270,522             |
| 1991 | 29,000            | 652,500                       | 37.0                          | 241,425             |
| 1992 | 24,000            | 508,800                       | 39.0                          | 198,432             |
| 1993 | 22,500            | 486,000                       | 43.0                          | 208,980             |
| 1994 | 21,000            | 449,400                       | 43.0                          | 193,242             |
| 1995 | 22,000            | 462,000                       | 46.0                          | 212,520             |

<sup>1/</sup> Includes home consumption.

<sup>2/</sup> Live weight equivalent price.

**CALIFORNIA HONEY PRODUCTION, NUMBER OF COLONIES, AND VALUE, 1988-95**

| Year | Honey Producing Colonies | Yield Per Colony | Production          | Average Price Per Pound | Value of Production |
|------|--------------------------|------------------|---------------------|-------------------------|---------------------|
|      | <i>1,000</i>             | <i>Pounds</i>    | <i>1,000 Pounds</i> | <i>Cents</i>            | <i>\$1,000</i>      |
| 1988 | 600                      | 40               | 24,000              | 49                      | 11,760              |
| 1989 | 620                      | 34               | 21,080              | 49                      | 10,329              |
| 1990 | 480                      | 42               | 20,160              | 54                      | 10,886              |
| 1991 | 550                      | 63               | 34,650              | 54                      | 18,711              |
| 1992 | 490                      | 67               | 32,830              | 52                      | 17,072              |
| 1993 | 500                      | 90               | 45,000              | 50                      | 22,500              |
| 1994 | 400                      | 60               | 24,000              | 51                      | 12,240              |
| 1995 | 420                      | 93               | 39,060              | 60                      | 23,436              |

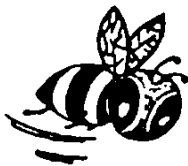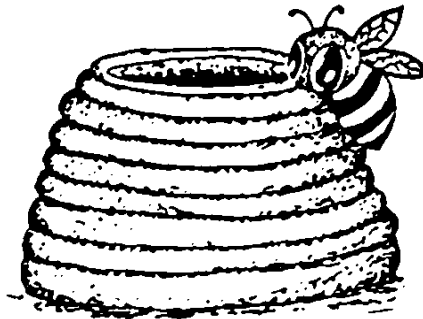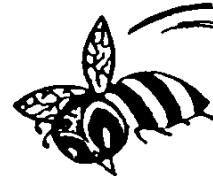

**CALIFORNIA LIVESTOCK PRODUCTION AND INCOME, 1986-95**

| Year              | Production<br><u>1/</u> | Marketings<br><u>2/</u> | Average Price<br>Per 100 Pounds |          | Value of<br>Production | Cash<br>Receipts<br><u>3/ 4/</u> | Value of<br>Home<br>Consumptio<br>n | Gross<br>Income |
|-------------------|-------------------------|-------------------------|---------------------------------|----------|------------------------|----------------------------------|-------------------------------------|-----------------|
|                   | 1,000 Pounds            |                         | Dollars                         |          | \$1,000                |                                  |                                     |                 |
|                   | TOTAL MEAT ANIMALS      |                         |                                 |          |                        |                                  |                                     |                 |
| 1986              | 1,983,133               | 3,020,041               | ---                             | ---      | 945,784                | 1,433,008                        | 22,937                              | 1,455,945       |
| 1987              | 1,958,050               | 2,542,454               | ---                             | ---      | 1,131,449              | 1,457,460                        | 22,365                              | 1,479,825       |
| 1988              | 2,196,792               | 2,707,013               | ---                             | ---      | 1,362,906              | 1,678,329                        | 26,352                              | 1,704,681       |
| 1989              | 2,170,550               | 2,748,174               | ---                             | ---      | 1,348,649              | 1,711,412                        | 20,339                              | 1,731,751       |
| 1990              | 2,029,815               | 2,809,866               | ---                             | ---      | 1,322,423              | 1,820,131                        | 21,950                              | 1,842,081       |
| 1991              | 2,116,743               | 2,754,502               | ---                             | ---      | 1,344,967              | 1,762,881                        | 22,451                              | 1,782,332       |
| 1992              | 2,071,286               | 2,601,468               | ---                             | ---      | 1,224,197              | 1,532,069                        | 19,387                              | 1,551,456       |
| 1993              | 2,008,139               | 2,636,088               | ---                             | ---      | 1,306,167              | 1,705,789                        | 20,902                              | 1,726,691       |
| 1994              | 2,089,703               | 2,646,374               | ---                             | ---      | 1,173,763              | 1,528,090                        | 12,863                              | 1,540,951       |
| 1995              | 2,117,427               | 2,891,254               | ---                             | ---      | 981,043                | 1,394,572                        | 11,891                              | 1,406,462       |
| CATTLE AND CALVES |                         |                         |                                 |          |                        |                                  |                                     |                 |
|                   |                         |                         | (Cattle)                        | (Calves) |                        |                                  |                                     |                 |
| 1986              | 1,851,090               | 2,873,100               | 46.70                           | 53.70    | 868,352                | 1,347,044                        | 18,302                              | 1,365,346       |
| 1987              | 1,817,500               | 2,382,400               | 56.30                           | 71.60    | 1,035,305              | 1,350,012                        | 18,819                              | 1,368,831       |
| 1988              | 2,070,710               | 2,557,200               | 61.80                           | 82.70    | 1,287,672              | 1,590,632                        | 23,240                              | 1,613,872       |
| 1989              | 2,056,490               | 2,619,260               | 62.20                           | 83.20    | 1,286,428              | 1,639,190                        | 17,158                              | 1,656,348       |
| 1990              | 1,890,920               | 2,654,880               | 65.00                           | 89.40    | 1,245,792              | 1,736,037                        | 18,447                              | 1,754,484       |
| 1991              | 1,965,580               | 2,586,300               | 64.10                           | 93.10    | 1,265,374              | 1,672,249                        | 18,104                              | 1,690,353       |
| 1992              | 1,908,900               | 2,409,800               | 59.10                           | 89.30    | 1,142,883              | 1,437,117                        | 16,461                              | 1,453,578       |
| 1993              | 1,838,210               | 2,425,610               | 64.80                           | 94.30    | 1,215,321              | 1,590,174                        | 16,884                              | 1,607,058       |
| 1994              | 1,943,243               | 2,460,650               | 57.40                           | 85.60    | 1,101,603              | 1,428,205                        | 10,168                              | 1,438,373       |
| 1995              | 1,968,665               | 2,703,670               | 47.00                           | 69.40    | 907,035                | 1,289,765                        | 9,218                               | 1,298,983       |
| SHEEP AND LAMBS   |                         |                         |                                 |          |                        |                                  |                                     |                 |
|                   |                         |                         | (Sheep)                         | (Lambs)  |                        |                                  |                                     |                 |
| 1986              | 73,668                  | 93,115                  | 23.20                           | 68.60    | 46,988                 | 57,830                           | 2,114                               | 59,944          |
| 1987              | 81,478                  | 102,502                 | 25.10                           | 74.90    | 61,907                 | 74,034                           | 1,305                               | 75,339          |
| 1988              | 72,224                  | 93,609                  | 23.60                           | 70.30    | 50,091                 | 61,250                           | 990                                 | 62,240          |
| 1989              | 66,478                  | 81,868                  | 21.10                           | 69.30    | 40,542                 | 50,605                           | 1,022                               | 51,627          |
| 1990              | 67,224                  | 87,706                  | 18.90                           | 60.10    | 34,833                 | 44,583                           | 840                                 | 45,423          |
| 1991              | 65,796                  | 88,063                  | 17.90                           | 53.80    | 30,438                 | 40,984                           | 571                                 | 41,555          |
| 1992              | 68,420                  | 104,322                 | 22.50                           | 62.90    | 37,471                 | 53,520                           | 832                                 | 54,352          |
| 1993              | 68,096                  | 110,702                 | 25.80                           | 65.70    | 39,644                 | 65,078                           | 571                                 | 65,649          |
| 1994              | 51,215                  | 89,832                  | 29.10                           | 65.60    | 27,842                 | 54,699                           | 745                                 | 55,443          |
| 1995              | 60,148                  | 98,218                  | 24.80                           | 79.20    | 41,379                 | 68,920                           | 793                                 | 69,712          |
| HOGS AND PIGS     |                         |                         |                                 |          |                        |                                  |                                     |                 |
| 1986              | 58,375                  | 53,826                  | 52.20                           | ---      | 30,444                 | 28,134                           | 2,521                               | 30,655          |
| 1987              | 59,072                  | 57,552                  | 58.00                           | ---      | 34,237                 | 33,414                           | 2,241                               | 35,655          |
| 1988              | 53,585                  | 56,204                  | 47.00                           | ---      | 25,143                 | 26,447                           | 2,122                               | 28,569          |
| 1989              | 47,582                  | 47,046                  | 45.70                           | ---      | 21,679                 | 21,617                           | 2,159                               | 23,776          |
| 1990              | 71,671                  | 67,280                  | 58.40                           | ---      | 41,798                 | 39,511                           | 2,663                               | 42,174          |
| 1991              | 85,367                  | 80,139                  | 57.90                           | ---      | 49,155                 | 49,648                           | 3,776                               | 50,424          |
| 1992              | 93,966                  | 87,346                  | 47.10                           | ---      | 43,843                 | 41,432                           | 2,094                               | 43,526          |
| 1993              | 101,833                 | 99,776                  | 50.40                           | ---      | 51,202                 | 50,537                           | 3,447                               | 53,984          |
| 1994              | 95,245                  | 95,892                  | 46.70                           | ---      | 44,318                 | 45,186                           | 1,950                               | 47,135          |
| 1995              | 88,614                  | 89,366                  | 39.70                           | ---      | 32,629                 | 35,887                           | 1,880                               | 37,767          |

1/ Live weight; adjustments made for changes in inventory and for inshipments.

2/ Live weight; excludes custom slaughter for use on farms where produced and interfarm sales within the State.

3/ Receipts from marketing and sale of farm slaughter.

4/ Hogs and pigs receipts for 1994 and 1995 include allowance for higher average price of State inshipments and outshipments of feeder pigs.

# CALIFORNIA VEGETABLES AND MELONS

## SUMMARY OF VEGETABLE AND MELON CROPS

California produced 19.8 million tons of vegetables and melons in 1995, 2% less than in 1994. Total value of vegetable production was \$5.55 billion, up 13% from 1994. Spring onions had the greatest percentage increase in value, which was 95% above 1994. Only fresh market artichokes, asparagus, garlic, bell peppers, and tomatoes, as well as processing broccoli and carrots, had lower total values than a year ago.

The Golden State continues to lead the Nation in vegetables and melons, accounting for 36% of the harvested acres, 54% of the production, and 63% of the total value.

The vegetable and melon estimates include commercial production, excluding garden production and vegetables grown for seed. Prices for processing crops and processed segments of dual utilization crops are based upon equivalent returns at the processing plant door.

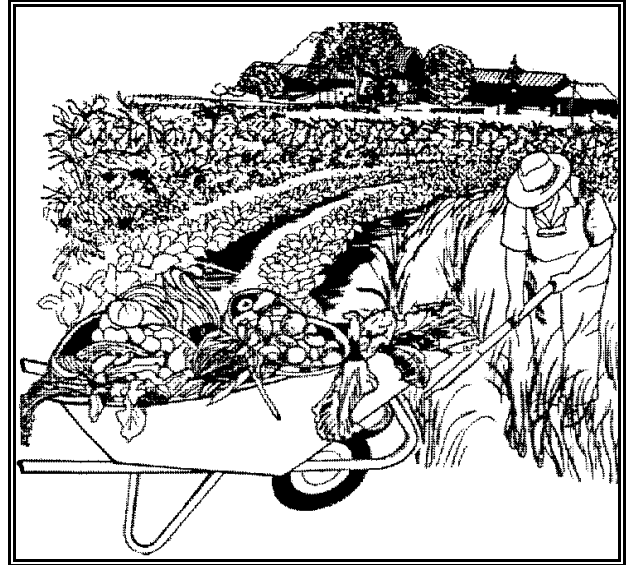

For fresh market sales, the price is on a packed and loaded basis, F.O.B. shipping point. Not all data are published for California to avoid disclosure of individual plants.

### 1995 CALIFORNIA VEGETABLES AND MELONS PERCENT OF TOTAL VALUE OF VEGETABLE PRODUCTION

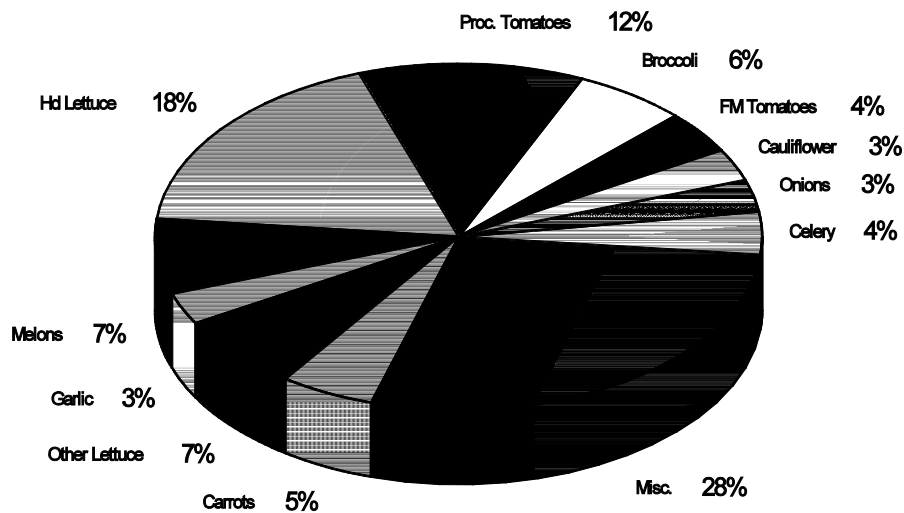

**CALIFORNIA VEGETABLES AND MELONS: Processing Crops, 1986-95**

| Crop                  | Year | Harvested Acreage | Average Yield | Production | Value Per Ton        |                       | Total Value |
|-----------------------|------|-------------------|---------------|------------|----------------------|-----------------------|-------------|
|                       |      |                   |               |            | First Delivery Point | Processing Plant Door |             |
|                       |      | Acres             | Tons          |            | Dollars              |                       |             |
| TOMATOES For          | 1986 | 210,400           | 30.80         | 6,480,320  | 51.00                | 62.20                 | 403,076     |
|                       | 1987 | 214,000           | 31.32         | 6,702,480  | 46.40                | 57.20                 | 383,382     |
|                       | 1988 | 226,100           | 28.96         | 6,547,860  | 48.20                | 58.90                 | 385,669     |
|                       | 1989 | 276,500           | 31.05         | 8,585,330  | 55.50                | 68.30                 | 586,378     |
|                       | 1990 | 310,000           | 30.02         | 9,306,200  | 55.20                | 66.30                 | 617,001     |
|                       | 1991 | 312,000           | 31.71         | 9,893,520  | 52.90                | 64.70                 | 640,111     |
|                       | 1992 | 240,000           | 33.05         | 7,932,000  | 46.10                | 56.40                 | 447,365     |
|                       | 1993 | 274,000           | 32.67         | 8,951,580  | 48.30                | 59.10                 | 529,038     |
|                       | 1994 | 311,000           | 34.56         | 10,748,160 | 50.90                | 61.00                 | 655,638     |
|                       | 1995 | 317,000           | 33.46         | 10,606,820 | 54.00                | 63.40                 | 672,472     |
| CUCUMBERS For Pickles | 1986 | 4,000             | 16.17         | 64,680     | N/A                  | 200.00                | 12,936      |
|                       | 1987 | 4,100             | 15.00         | 61,500     | N/A                  | 198.00                | 12,177      |
|                       | 1988 | 3,800             | 18.16         | 69,010     | N/A                  | 213.00                | 14,699      |
|                       | 1989 | 4,300             | 12.20         | 52,460     | N/A                  | 247.00                | 12,958      |
|                       | 1990 | 4,700             | 13.30         | 62,510     | N/A                  | 214.00                | 13,377      |
|                       | 1991 | 4,200             | 13.01         | 54,640     | N/A                  | 230.00                | 12,567      |
|                       | 1992 | 2,500             | 16.10         | 40,250     | N/A                  | 209.00                | 8,412       |
|                       | 1993 | 4,200             | 10.24         | 43,010     | N/A                  | 192.00                | 8,258       |
|                       | 1994 | 4,900             | 9.26          | 45,370     | N/A                  | 183.00                | 8,303       |
|                       | 1995 | 5,200             | 8.10          | 42,120     | N/A                  | 383.00                | 16,132      |

**CALIFORNIA VEGETABLES AND MELONS: Fresh Market And Dual Usage Crops, 1986-95**

| Crop                                  | Year | Harvested Acreage | Average Yield | Production        | Value Per Cwt. <i>a/</i> | Total Value    |
|---------------------------------------|------|-------------------|---------------|-------------------|--------------------------|----------------|
|                                       |      | <i>Acres</i>      | <i>Cwt.</i>   | <i>1,000 Cwt.</i> | <i>Dollars</i>           | <i>\$1,000</i> |
| ARTICHOKES <i>b/</i>                  | 1992 | 9,600             | 115           | 1,104             | 39.40                    | 43,447         |
|                                       | 1993 | 8,300             | 110           | 913               | 50.10                    | 45,762         |
|                                       | 1994 | 8,500             | 130           | 1,105             | 55.70                    | 61,577         |
|                                       | 1995 | 8,300             | 57            | 473               | 72.50                    | 34,299         |
| ASPARAGUS                             | 1986 | 37,800            | 29            | 1,096             | 68.90                    | 75,513         |
|                                       | 1987 | 39,700            | 30            | 1,191             | 62.80                    | 74,746         |
|                                       | 1988 | 40,100            | 29            | 1,163             | 71.70                    | 83,431         |
|                                       | 1989 | 37,500            | 29            | 1,088             | 66.20                    | 71,978         |
|                                       | 1990 | 35,900            | 29            | 1,041             | 68.00                    | 70,833         |
|                                       | 1991 | 33,500            | 28            | 938               | 78.10                    | 73,258         |
|                                       | 1992 | 34,000            | 29            | 986               | 92.70                    | 91,386         |
|                                       | 1993 | 32,100            | 29            | 931               | 94.70                    | 88,177         |
|                                       | 1994 | 30,200            | 33            | 997               | 102.00                   | 101,694        |
|                                       | 1995 | 28,000            | 28            | 784               | 117.00                   | 91,728         |
| BEANS, SNAP <i>b/</i><br>Fresh Market | 1992 | 6,900             | 90            | 621               | 27.40                    | 17,015         |
|                                       | 1993 | 7,300             | 80            | 584               | 49.90                    | 29,142         |
|                                       | 1994 | 7,500             | 70            | 525               | 57.20                    | 30,030         |
|                                       | 1995 | 8,800             | 90            | 792               | 51.00                    | 40,392         |
| BROCCOLI<br>Fresh Market              | 1986 | ---               | ---           | 7,667             | 21.40                    | 164,074        |
|                                       | 1987 | ---               | ---           | 7,830             | 21.40                    | 167,562        |
|                                       | 1988 | ---               | ---           | 9,167             | 23.90                    | 219,091        |
|                                       | 1989 | ---               | ---           | 9,792             | 20.40                    | 199,757        |
|                                       | 1990 | ---               | ---           | 9,113             | 22.30                    | 203,220        |
|                                       | 1991 | ---               | ---           | 8,560             | 21.60                    | 184,896        |
|                                       | 1992 | ---               | ---           | 9,625             | 23.50                    | 226,188        |
|                                       | 1993 | ---               | ---           | 8,625             | 26.20                    | 225,975        |
|                                       | 1994 | ---               | ---           | 10,119            | 28.10                    | 284,344        |
|                                       | 1995 | ---               | ---           | 9,780             | 30.60                    | 299,268        |

See Footnotes on Page 48.

**CALIFORNIA VEGETABLES AND MELONS: Fresh Market And Dual Usage Crops, 1986-95**

| Crop                                      | Year | Harvested<br>Acreage | Average<br>Yield | Production        | Value Per<br>Cwt. <u>a/</u> | Total<br>Value |
|-------------------------------------------|------|----------------------|------------------|-------------------|-----------------------------|----------------|
|                                           |      | <i>Acres</i>         | <i>Cwt.</i>      | <i>1,000 Cwt.</i> | <i>Dollars</i>              | <i>\$1,000</i> |
| <b>BROCCOLI<br/>Processing</b>            | 1986 | ---                  | ---              | 2,760             | 18.10                       | 49,956         |
|                                           | 1987 | ---                  | ---              | 2,500             | 18.00                       | 45,000         |
|                                           | 1988 | ---                  | ---              | 2,460             | 19.10                       | 46,863         |
|                                           | 1989 | ---                  | ---              | 2,400             | 18.40                       | 44,160         |
|                                           | 1990 | ---                  | ---              | 2,100             | 19.80                       | 41,475         |
|                                           | 1991 | ---                  | ---              | 1,560             | 19.70                       | 30,654         |
|                                           | 1992 | ---                  | ---              | 1,530             | 19.30                       | 29,529         |
|                                           | 1993 | ---                  | ---              | 1,140             | 19.20                       | 21,888         |
|                                           | 1994 | ---                  | ---              | 1,221             | 16.10                       | 19,726         |
|                                           | 1995 | ---                  | ---              | 960               | 14.10                       | 18,336         |
| <b>BROCCOLI<br/>Total</b>                 | 1986 | 106,400              | 98               | 10,427            | 20.50                       | 214,030        |
|                                           | 1987 | 107,600              | 96               | 10,330            | 20.60                       | 212,562        |
|                                           | 1988 | 101,100              | 115              | 11,627            | 22.90                       | 265,954        |
|                                           | 1989 | 101,600              | 120              | 12,192            | 20.00                       | 243,917        |
|                                           | 1990 | 97,500               | 115              | 11,213            | 21.80                       | 244,695        |
|                                           | 1991 | 88,000               | 115              | 10,120            | 21.30                       | 215,550        |
|                                           | 1992 | 97,000               | 115              | 11,155            | 22.90                       | 255,717        |
|                                           | 1993 | 93,000               | 105              | 9,765             | 25.40                       | 247,863        |
|                                           | 1994 | 94,500               | 120              | 11,340            | 26.80                       | 304,070        |
|                                           | 1995 | 89,500               | 120              | 10,740            | 29.60                       | 317,604        |
| <b>BRUSSELS SPROUTS <u>b/</u></b>         | 1992 | 3,500                | 160              | 560               | 30.50                       | 17,104         |
|                                           | 1993 | 5,000                | 160              | 800               | 31.00                       | 24,761         |
|                                           | 1994 | 3,500                | 180              | 630               | 24.60                       | 15,471         |
|                                           | 1995 | 3,800                | 170              | 646               | 25.50                       | 16,452         |
| <b>CABBAGE <u>b/</u><br/>Fresh Market</b> | 1992 | 11,500               | 335              | 3,853             | 9.64                        | 37,143         |
|                                           | 1993 | 12,000               | 360              | 4,320             | 13.70                       | 59,184         |
|                                           | 1994 | 10,000               | 385              | 3,850             | 13.40                       | 51,590         |
|                                           | 1995 | 13,000               | 370              | 4,810             | 15.70                       | 75,517         |
| <b>CARROTS <u>c/</u><br/>Fresh Market</b> | 1986 | ---                  | ---              | 10,960            | 13.00                       | 142,480        |
|                                           | 1987 | ---                  | ---              | 14,600            | 10.60                       | 154,760        |
|                                           | 1988 | ---                  | ---              | 12,022            | 13.00                       | 156,286        |
|                                           | 1989 | ---                  | ---              | 14,675            | 13.70                       | 201,048        |
|                                           | 1990 | ---                  | ---              | 15,852            | 11.20                       | 177,542        |
|                                           | 1991 | ---                  | ---              | 14,240            | 14.00                       | 199,360        |
|                                           | 1992 | ---                  | ---              | 14,940            | 13.90                       | 207,666        |
|                                           | 1993 | 51,200               | 300              | 15,400            | 11.10                       | 170,940        |
|                                           | 1994 | 58,300               | 325              | 18,948            | 11.50                       | 218,118        |
|                                           | 1995 | 63,500               | 290              | 18,415            | 15.10                       | 278,067        |
| <b>CARROTS <u>c/</u><br/>Processing</b>   | 1986 | ---                  | ---              | 1,798             | 4.05                        | 7,282          |
|                                           | 1987 | ---                  | ---              | 1,400             | 4.33                        | 6,055          |
|                                           | 1988 | ---                  | ---              | 1,520             | 4.18                        | 6,346          |
|                                           | 1989 | ---                  | ---              | 2,515             | 3.23                        | 8,136          |
|                                           | 1990 | ---                  | ---              | 2,100             | 4.25                        | 8,925          |
|                                           | 1991 | ---                  | ---              | 2,000             | 4.78                        | 9,550          |
|                                           | 1992 | ---                  | ---              | 2,160             | 4.35                        | 9,396          |
|                                           | 1993 | 6,800                | 294              | 2,000             | 4.85                        | 9,700          |
|                                           | 1994 | 4,100                | 618              | 2,532             | 3.81                        | 9,635          |
|                                           | 1995 | 5,100                | 478              | 2,440             | 3.69                        | 9,003          |
| <b>CARROTS<br/>Total</b>                  | 1986 | 40,500               | 315              | 12,758            | 11.70                       | 149,762        |
|                                           | 1987 | 50,000               | 320              | 16,000            | 10.10                       | 160,815        |
|                                           | 1988 | 51,100               | 265              | 13,542            | 12.00                       | 162,632        |
|                                           | 1989 | 57,300               | 300              | 17,190            | 12.20                       | 209,184        |
|                                           | 1990 | 56,100               | 320              | 17,952            | 10.40                       | 186,467        |
|                                           | 1991 | 56,000               | 290              | 16,240            | 12.90                       | 208,910        |
|                                           | 1992 | 60,000               | 285              | 17,100            | 12.70                       | 217,062        |
|                                           | 1993 | 58,000               | 300              | 17,400            | 10.40                       | 180,640        |
|                                           | 1994 | 62,400               | 344              | 21,480            | 10.60                       | 227,753        |
|                                           | 1995 | 68,600               | 305              | 20,855            | 13.80                       | 287,070        |

See Footnotes on Page 48.

**CALIFORNIA VEGETABLES AND MELONS: Fresh Market And Dual Usage Crops, 1986-95**

| Crop                                | Year | Harvested<br>Acreage | Average<br>Yield | Production        | Value Per<br>Cwt. <u>a/</u> | Total<br>Value |
|-------------------------------------|------|----------------------|------------------|-------------------|-----------------------------|----------------|
|                                     |      | <i>Acres</i>         | <i>Cwt.</i>      | <i>1,000 Cwt.</i> | <i>Dollars</i>              | <i>\$1,000</i> |
| CAULIFLOWER<br>Fresh Market         | 1986 | ---                  | ---              | 4,670             | 28.50                       | 133,095        |
|                                     | 1987 | ---                  | ---              | 4,661             | 28.40                       | 132,372        |
|                                     | 1988 | ---                  | ---              | 5,340             | 27.60                       | 147,384        |
|                                     | 1989 | ---                  | ---              | 5,378             | 27.80                       | 149,508        |
|                                     | 1990 | ---                  | ---              | 5,506             | 24.80                       | 136,549        |
|                                     | 1991 | ---                  | ---              | 5,110             | 26.40                       | 134,904        |
|                                     | 1992 | ---                  | ---              | <u>d/</u>         | <u>d/</u>                   | <u>d/</u>      |
|                                     | 1993 | ---                  | ---              | <u>d/</u>         | <u>d/</u>                   | <u>d/</u>      |
|                                     | 1994 | ---                  | ---              | <u>d/</u>         | <u>d/</u>                   | <u>d/</u>      |
|                                     | 1995 | ---                  | ---              | <u>d/</u>         | <u>d/</u>                   | <u>d/</u>      |
| CAULIFLOWER<br>Processing           | 1986 | ---                  | ---              | 1,160             | 14.80                       | 17,110         |
|                                     | 1987 | ---                  | ---              | 960               | 15.40                       | 14,784         |
|                                     | 1988 | ---                  | ---              | 900               | 15.70                       | 14,130         |
|                                     | 1989 | ---                  | ---              | 660               | 17.50                       | 11,550         |
|                                     | 1990 | ---                  | ---              | 650               | 25.20                       | 16,380         |
|                                     | 1991 | ---                  | ---              | 350               | 29.00                       | 10,150         |
|                                     | 1992 | ---                  | ---              | <u>d/</u>         | <u>d/</u>                   | <u>d/</u>      |
|                                     | 1993 | ---                  | ---              | <u>d/</u>         | <u>d/</u>                   | <u>d/</u>      |
|                                     | 1994 | ---                  | ---              | <u>d/</u>         | <u>d/</u>                   | <u>d/</u>      |
|                                     | 1995 | ---                  | ---              | <u>d/</u>         | <u>d/</u>                   | <u>d/</u>      |
| CAULIFLOWER<br>Total                | 1986 | 53,000               | 110              | 5,830             | 25.80                       | 150,205        |
|                                     | 1987 | 51,100               | 110              | 5,621             | 26.20                       | 147,156        |
|                                     | 1988 | 48,000               | 130              | 6,240             | 25.90                       | 161,514        |
|                                     | 1989 | 52,500               | 115              | 6,038             | 26.70                       | 161,058        |
|                                     | 1990 | 51,300               | 120              | 6,156             | 24.80                       | 152,929        |
|                                     | 1991 | 42,000               | 130              | 5,460             | 26.60                       | 145,054        |
|                                     | 1992 | 42,000               | 130              | 5,460             | 28.40                       | 155,001        |
|                                     | 1993 | 43,000               | 125              | 5,375             | 29.60                       | 159,245        |
|                                     | 1994 | 42,000               | 130              | 5,460             | 28.30                       | 154,594        |
|                                     | 1995 | 40,700               | 125              | 5,088             | 33.70                       | 171,559        |
| CELERY                              | 1986 | 21,400               | 593              | 12,683            | 11.70                       | 147,764        |
|                                     | 1987 | 21,300               | 595              | 12,671            | 10.80                       | 136,348        |
|                                     | 1988 | 20,300               | 654              | 13,277            | 11.10                       | 147,740        |
|                                     | 1989 | 21,800               | 670              | 14,612            | 12.70                       | 184,842        |
|                                     | 1990 | 24,800               | 597              | 14,812            | 10.80                       | 159,999        |
|                                     | 1991 | 20,900               | 670              | 14,003            | 10.30                       | 143,739        |
|                                     | 1992 | 23,500               | 670              | 15,750            | 12.10                       | 190,445        |
|                                     | 1993 | 24,500               | 640              | 15,680            | 14.70                       | 230,545        |
|                                     | 1994 | 24,500               | 630              | 15,435            | 12.60                       | 194,181        |
|                                     | 1995 | 22,700               | 660              | 14,982            | 16.40                       | 246,229        |
| CORN, SWEET<br>Fresh Market         | 1986 | 15,000               | 100              | 1,500             | 16.10                       | 24,150         |
|                                     | 1987 | 16,000               | 95               | 1,520             | 13.30                       | 20,216         |
|                                     | 1988 | 18,000               | 90               | 1,620             | 15.10                       | 24,462         |
|                                     | 1989 | 17,500               | 115              | 2,013             | 16.10                       | 32,409         |
|                                     | 1990 | 20,000               | 95               | 1,900             | 16.70                       | 31,730         |
|                                     | 1991 | 16,300               | 120              | 1,956             | 16.30                       | 31,883         |
|                                     | 1992 | 18,500               | 130              | 2,405             | 16.00                       | 38,480         |
|                                     | 1993 | 20,000               | 140              | 2,800             | 17.80                       | 49,840         |
|                                     | 1994 | 21,600               | 140              | 3,024             | 18.30                       | 55,339         |
|                                     | 1995 | 22,300               | 150              | 3,345             | 18.70                       | 62,552         |
| CUCUMBERS <u>b/</u><br>Fresh Market | 1992 | 4,500                | 300              | 1,350             | 28.30                       | 38,205         |
|                                     | 1993 | 5,600                | 250              | 1,400             | 27.10                       | 37,940         |
|                                     | 1994 | 5,000                | 250              | 1,250             | 24.90                       | 31,125         |
|                                     | 1995 | 5,200                | 315              | 1,638             | 26.30                       | 43,079         |
| GARLIC <u>b/</u>                    | 1992 | 23,000               | 165              | 3,795             | 27.10                       | 102,854        |
|                                     | 1993 | 26,000               | 160              | 4,160             | 31.80                       | 132,470        |
|                                     | 1994 | 27,000               | 170              | 4,590             | 39.40                       | 181,038        |
|                                     | 1995 | 31,000               | 165              | 5,115             | 35.20                       | 179,834        |

See Footnotes on Page 48.



**CALIFORNIA VEGETABLES AND MELONS: Fresh Market And Dual Usage Crops, 1986-95**

| Crop                         | Year | Harvested<br>Acreage | Average<br>Yield | Production        | Value Per<br>Cwt. <u>a/</u> | Total<br>Value |
|------------------------------|------|----------------------|------------------|-------------------|-----------------------------|----------------|
|                              |      | <i>Acres</i>         | <i>Cwt.</i>      | <i>1,000 Cwt.</i> | <i>Dollars</i>              | <i>\$1,000</i> |
| LETTUCE<br>Head              | 1986 | 145,500              | 290              | 42,195            | 11.50                       | 485,243        |
|                              | 1987 | 157,100              | 315              | 49,487            | 15.10                       | 747,254        |
|                              | 1988 | 166,700              | 310              | 51,677            | 12.20                       | 630,459        |
|                              | 1989 | 168,400              | 340              | 57,256            | 11.70                       | 669,895        |
|                              | 1990 | 162,200              | 345              | 55,959            | 12.20                       | 682,700        |
|                              | 1991 | 152,000              | 335              | 50,920            | 11.80                       | 600,856        |
|                              | 1992 | 147,000              | 360              | 52,920            | 13.00                       | 687,960        |
|                              | 1993 | 141,000              | 360              | 50,760            | 16.50                       | 837,540        |
|                              | 1994 | 145,000              | 330              | 47,850            | 14.60                       | 698,610        |
|                              | 1995 | 136,000              | 295              | 40,120            | 24.60                       | 986,952        |
| LETTUCE<br>Leaf <u>b/</u>    | 1992 | 32,000               | 215              | 6,880             | 22.40                       | 154,112        |
|                              | 1993 | 35,000               | 205              | 7,175             | 27.70                       | 198,748        |
|                              | 1994 | 33,000               | 225              | 7,425             | 28.10                       | 208,643        |
|                              | 1995 | 35,000               | 210              | 7,350             | 30.70                       | 225,645        |
| LETTUCE<br>Romaine <u>b/</u> | 1992 | 15,500               | 300              | 4,650             | 18.10                       | 84,165         |
|                              | 1993 | 19,000               | 280              | 5,320             | 18.60                       | 98,952         |
|                              | 1994 | 21,000               | 280              | 5,880             | 21.40                       | 125,832        |
|                              | 1995 | 24,000               | 300              | 7,200             | 24.00                       | 172,800        |
| MELONS<br>Cantaloupe         | 1986 | 79,100               | 160              | 12,656            | 12.40                       | 156,934        |
|                              | 1987 | 85,100               | 150              | 12,765            | 11.50                       | 146,798        |
|                              | 1988 | 84,000               | 140              | 11,760            | 15.45                       | 181,692        |
|                              | 1989 | 80,800               | 190              | 15,352            | 12.60                       | 193,435        |
|                              | 1990 | 90,200               | 150              | 13,530            | 9.20                        | 124,476        |
|                              | 1991 | N/A                  | N/A              | N/A               | N/A                         | N/A            |
|                              | 1992 | 64,000               | 180              | 11,520            | 14.00                       | 161,280        |
|                              | 1993 | 65,000               | 190              | 12,350            | 15.30                       | 188,955        |
|                              | 1994 | 59,300               | 190              | 11,267            | 15.90                       | 179,145        |
|                              | 1995 | 59,300               | 230              | 13,639            | 17.40                       | 237,319        |
| Honeydew                     | 1986 | 19,000               | 200              | 3,800             | 11.00                       | 41,800         |
|                              | 1987 | 20,600               | 180              | 3,708             | 11.90                       | 44,125         |
|                              | 1988 | 21,300               | 170              | 3,621             | 13.10                       | 47,435         |
|                              | 1989 | 21,300               | 190              | 4,047             | 11.80                       | 47,755         |
|                              | 1990 | 19,000               | 180              | 3,420             | 15.80                       | 54,036         |
|                              | 1991 | 18,200               | 140              | 2,548             | 15.60                       | 39,749         |
|                              | 1992 | 17,500               | 180              | 3,150             | 13.00                       | 40,950         |
|                              | 1993 | 16,500               | 160              | 2,640             | 16.70                       | 44,088         |
|                              | 1994 | 18,100               | 155              | 2,806             | 16.10                       | 45,177         |
|                              | 1995 | 21,100               | 200              | 4,220             | 18.70                       | 78,914         |
| Watermelon <u>b/</u>         | 1992 | 15,000               | 400              | 6,000             | 8.72                        | 52,320         |
|                              | 1993 | 17,500               | 420              | 7,350             | 8.04                        | 59,094         |
|                              | 1994 | 16,700               | 430              | 7,181             | 9.91                        | 71,164         |
|                              | 1995 | 17,200               | 370              | 6,364             | 14.30                       | 91,005         |
| MUSHROOMS (Agaricus)         | 1986 | 518                  | 2,064            | 1,069             | 97.70                       | 104,444        |
|                              | 1987 | 495                  | 2,242            | 1,110             | 110.00                      | 122,064        |
|                              | 1988 | 501                  | 2,248            | 1,126             | 97.90                       | 110,189        |
|                              | 1989 | 529                  | 2,440            | 1,291             | 100.00                      | 129,457        |
|                              | 1990 | 545                  | 2,440            | 1,330             | 96.00                       | 127,701        |
|                              | 1991 | 532                  | 2,453            | 1,305             | 97.60                       | 127,446        |
|                              | 1992 | 488                  | 2,498            | 1,219             | 99.40                       | 121,208        |
|                              | 1993 | 528                  | 2,434            | 1,285             | 101.00                      | 129,866        |
|                              | 1994 | 501                  | 2,475            | 1,240             | 105.57                      | 130,911        |
|                              | 1995 | 503                  | 2,682            | 1,349             | 104.37                      | 140,796        |
| ONIONS<br>Spring             | 1986 | 7,800                | 370              | 2,886             | 10.20                       | 29,437         |
|                              | 1987 | 8,200                | 390              | 3,198             | 17.50                       | 55,965         |
|                              | 1988 | 8,500                | 390              | 3,315             | 9.71                        | 32,189         |
|                              | 1989 | 7,700                | 400              | 3,080             | 11.30                       | 34,804         |
|                              | 1990 | 8,500                | 420              | 3,570             | 11.10                       | 39,627         |
|                              | 1991 | 8,000                | 395              | 3,160             | 18.00                       | 56,880         |
|                              | 1992 | 9,000                | 400              | 3,600             | 11.80                       | 42,480         |
|                              | 1993 | 7,500                | 440              | 3,300             | 18.00                       | 59,400         |
|                              | 1994 | 6,700                | 440              | 2,948             | 8.02                        | 23,643         |
|                              | 1995 | 7,500                | 440              | 3,300             | 14.00                       | 46,200         |

See Footnotes on Page 48.

**CALIFORNIA VEGETABLES AND MELONS: Fresh Market And Dual Usage Crops, 1986-95**

| Crop                                                                                | Year | Harvested Acreage | Average Yield | Production | Value Per Cwt. <u>a/</u> | Total Value |
|-------------------------------------------------------------------------------------|------|-------------------|---------------|------------|--------------------------|-------------|
|                                                                                     |      | Acres             | Cwt.          | 1,000 Cwt. | Dollars                  | \$1,000     |
| ONIONS<br>Summer <u>e/</u>                                                          | 1986 | 26,900            | 370           | 9,953      | 7.87                     | 76,765      |
|                                                                                     | 1987 | 29,000            | 340           | 9,860      | 7.64                     | 72,840      |
|                                                                                     | 1988 | 28,800            | 365           | 10,512     | 5.69                     | 58,193      |
|                                                                                     | 1989 | 27,000            | 375           | 10,125     | 7.54                     | 74,867      |
|                                                                                     | 1990 | 30,500            | 380           | 11,590     | 7.49                     | 85,067      |
|                                                                                     | 1991 | 28,600            | 370           | 10,582     | 7.06                     | 73,510      |
|                                                                                     | 1992 | 27,500            | 375           | 10,313     | 8.26                     | 82,946      |
|                                                                                     | 1993 | 33,000            | 395           | 13,035     | 8.04                     | 102,268     |
|                                                                                     | 1994 | 31,000            | 410           | 12,710     | 6.18                     | 78,485      |
|                                                                                     | 1995 | 30,500            | 415           | 12,658     | 6.67                     | 84,466      |
| ONIONS<br>Total <u>e/</u>                                                           | 1986 | 34,700            | 370           | 12,839     | 8.40                     | 106,202     |
|                                                                                     | 1987 | 37,200            | 351           | 13,058     | 10.10                    | 128,805     |
|                                                                                     | 1988 | 37,300            | 371           | 13,827     | 6.67                     | 90,382      |
|                                                                                     | 1989 | 34,700            | 381           | 13,205     | 8.43                     | 109,671     |
|                                                                                     | 1990 | 39,000            | 389           | 15,160     | 8.35                     | 124,694     |
|                                                                                     | 1991 | 36,600            | 375           | 13,742     | 9.61                     | 130,390     |
|                                                                                     | 1992 | 36,500            | 381           | 13,913     | 9.20                     | 125,426     |
|                                                                                     | 1993 | 40,500            | 403           | 16,335     | 10.10                    | 161,668     |
|                                                                                     | 1994 | 37,700            | 415           | 15,658     | 6.52                     | 102,128     |
|                                                                                     | 1995 | 38,000            | 420           | 15,958     | 8.19                     | 130,666     |
| PEPPERS, BELL <u>b/</u>                                                             | 1992 | 20,000            | 285           | 5,700      | 18.30                    | 104,470     |
|                                                                                     | 1993 | 18,500            | 300           | 5,550      | 26.90                    | 149,057     |
|                                                                                     | 1994 | 20,500            | 290           | 5,945      | 25.60                    | 152,287     |
|                                                                                     | 1995 | 20,000            | 290           | 5,800      | 25.90                    | 150,020     |
| SPINACH <u>b/</u><br>Fresh Market                                                   | 1992 | 7,000             | 205           | 1,435      | 18.20                    | 26,117      |
|                                                                                     | 1993 | 6,000             | 215           | 1,290      | 31.00                    | 39,990      |
|                                                                                     | 1994 | 5,800             | 205           | 1,189      | 30.80                    | 36,621      |
|                                                                                     | 1995 | 6,700             | 185           | 1,240      | 34.40                    | 42,656      |
| TOMATOES<br>Fresh Market                                                            | 1986 | 28,600            | 278           | 7,938      | 22.80                    | 180,956     |
|                                                                                     | 1987 | 29,500            | 300           | 8,850      | 21.50                    | 190,275     |
|                                                                                     | 1988 | 37,500            | 245           | 9,188      | 29.90                    | 274,721     |
|                                                                                     | 1989 | 38,400            | 260           | 9,984      | 24.00                    | 239,616     |
|                                                                                     | 1990 | 38,000            | 255           | 9,690      | 28.20                    | 273,258     |
|                                                                                     | 1991 | 40,000            | 235           | 9,400      | 25.00                    | 235,000     |
|                                                                                     | 1992 | 36,000            | 280           | 10,080     | 34.10                    | 343,728     |
|                                                                                     | 1993 | 37,500            | 270           | 10,125     | 26.30                    | 266,288     |
|                                                                                     | 1994 | 36,500            | 275           | 10,038     | 24.80                    | 248,942     |
|                                                                                     | 1995 | 38,000            | 270           | 10,260     | 18.80                    | 192,888     |
| MISCELLANEOUS<br>VEGETABLES<br>AND MELONS <u>f/</u><br>Fresh Market &<br>Processing | 1986 | 182,300           | ---           | ---        | ---                      | 629,256     |
|                                                                                     | 1987 | 241,690           | ---           | ---        | ---                      | 702,180     |
|                                                                                     | 1988 | 249,098           | ---           | ---        | ---                      | 692,478     |
|                                                                                     | 1989 | 201,132           | ---           | ---        | ---                      | 669,884     |
|                                                                                     | 1990 | 219,350           | ---           | ---        | ---                      | 711,961     |
|                                                                                     | 1991 | 303,700           | ---           | ---        | ---                      | 884,344     |
|                                                                                     | 1992 | 131,118           | ---           | ---        | ---                      | 356,077     |
|                                                                                     | 1993 | 132,470           | ---           | ---        | ---                      | 666,130     |
|                                                                                     | 1994 | 122,084           | ---           | ---        | ---                      | 841,438     |
|                                                                                     | 1995 | 151,572           | ---           | ---        | ---                      | 841,919     |

a/ The processed price is based on equivalent returns at the processing plant door. The fresh market price is on a packed and loaded basis, f.o.b. shipping point.

b/ Program initiated for 1992.

c/ Fresh market and processed acreage separated starting in 1993.

d/ Information unavailable due to disclosure.

e/ Onion production includes quantity harvested, but not marketed because of loss during storage (shrinkage): 1986 -- 200,000 cwt., 1987 -- 320,000 cwt., 1988 -- 280,000 cwt., 1989 -- 200,000 cwt., 1990 -- 234,000 cwt., 1991 -- 174,000 cwt., 1992 -- 275,000 cwt., 1993 -- 313,000 cwt., 1994 -- 248,000 cwt.; 1995 -- 253,000 cwt. Storage loss amounts are excluded when computing total value.

f/ Miscellaneous vegetables and melons include: Green lima beans for processing, oriental vegetables, green peas, chili peppers, squash, etc. The new crops added in 1992 are excluded from the 1992 to present miscellaneous totals. Miscellaneous figures come from County Agricultural Commissioners.

# CALIFORNIA TOMATOES FOR PROCESSING BY COUNTY, 1995

| County             | Contracted and Open Market |                 |              |                   |
|--------------------|----------------------------|-----------------|--------------|-------------------|
|                    | Planted Acres              | Harvested Acres | Yield        | Production 1/     |
|                    | Acres                      |                 | Tons/Acre    | Tons              |
| Contra Costa       | 4,200                      | 4,000           | 34.58        | 138,300           |
| San Benito         | 2,200                      | 2,100           | 34.14        | 71,700            |
| Santa Clara        | 1,200                      | 1,100           | 36.45        | 40,100            |
| Colusa             | 30,200                     | 28,500          | 32.95        | 939,000           |
| Sacramento         | 7,000                      | 6,400           | 28.36        | 181,500           |
| Solano             | 20,500                     | 19,200          | 30.25        | 580,800           |
| Sutter             | 22,900                     | 21,500          | 31.52        | 677,700           |
| Yolo               | 71,000                     | 68,200          | 32.58        | 2,221,800         |
| Fresno             | 101,000                    | 98,000          | 34.46        | 3,377,400         |
| Merced             | 10,000                     | 9,600           | 41.94        | 402,600           |
| San Joaquin        | 24,200                     | 23,500          | 38.49        | 904,400           |
| Stanislaus         | 18,200                     | 17,400          | 28.73        | 499,900           |
| Other Counties 2/  | 18,400                     | 17,500          | 32.66        | 571,620           |
| <b>State Total</b> | <b>331,000</b>             | <b>317,000</b>  | <b>33.46</b> | <b>10,606,820</b> |

1/ On the basis of PAID FOR TONNAGE purchased from growers as reported by processors, dockage not included.

2/ To avoid disclosure of individual operations, OTHER COUNTIES include: Madera, Monterey, Kern, Kings, Imperial, Santa Barbara, Tulare, and Ventura.

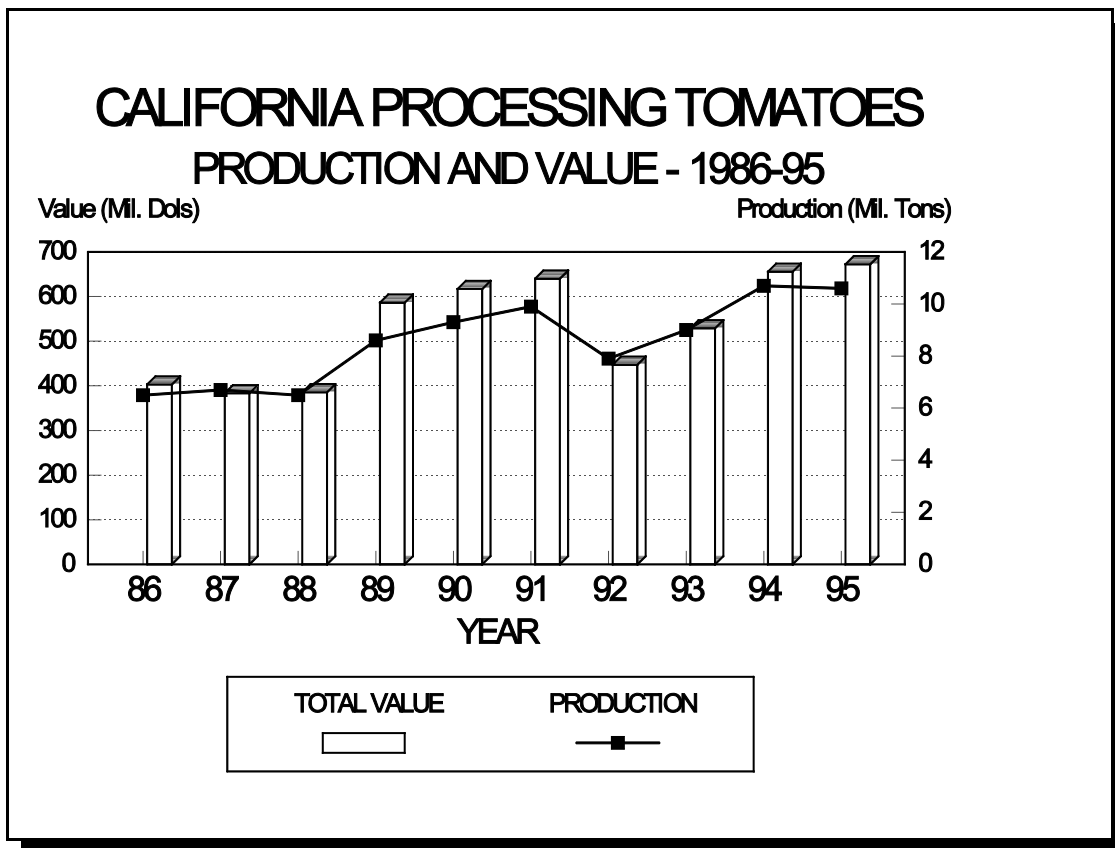

**CALIFORNIA VEGETABLE CROPS: 1993-95 Monthly Prices, Selected Fresh Market Vegetables 1/**

| Crop                  | Month                            |        |       |        |       |        |        |        |        |        |       |       |
|-----------------------|----------------------------------|--------|-------|--------|-------|--------|--------|--------|--------|--------|-------|-------|
|                       | Jan.                             | Feb.   | Mar.  | Apr.   | May   | June   | July   | Aug.   | Sep.   | Oct.   | Nov.  | Dec.  |
|                       | <i>Dollars Per Hundredweight</i> |        |       |        |       |        |        |        |        |        |       |       |
| <b>ASPARAGUS</b>      |                                  |        |       |        |       |        |        |        |        |        |       |       |
| 1993                  | 121.00                           | 113.00 | 80.70 | 107.00 | 72.40 | 111.00 | 164.00 | 171.00 | 176.00 | 146.00 | ---   | ---   |
| 1994                  | 135.00                           | 141.00 | 97.60 | 88.60  | 93.50 | 101.00 | 207.00 | 144.00 | 196.00 | 151.00 | ---   | ---   |
| 1995                  | 150.00                           | 118.00 | 93.60 | 161.00 | 90.00 | 107.00 | ---    | ---    | ---    | ---    | ---   | ---   |
| <b>BROCCOLI</b>       |                                  |        |       |        |       |        |        |        |        |        |       |       |
| 1993                  | 32.60                            | 28.10  | 28.60 | 23.70  | 22.30 | 26.80  | 24.50  | 20.00  | 36.60  | 22.40  | 24.20 | 30.00 |
| 1994                  | 23.50                            | 21.40  | 19.50 | 21.80  | 27.10 | 21.10  | 21.60  | 18.50  | 38.60  | 37.00  | 57.70 | 46.00 |
| 1995                  | 23.70                            | 33.30  | 53.40 | 33.00  | 25.50 | 26.30  | 18.50  | 30.30  | 26.70  | 22.60  | 22.00 | 26.90 |
| <b>CARROTS</b>        |                                  |        |       |        |       |        |        |        |        |        |       |       |
| 1993                  | 18.20                            | 13.00  | 11.00 | 12.40  | 10.90 | 10.10  | 8.74   | 8.33   | 8.33   | 9.38   | 10.30 | 10.80 |
| 1994                  | 10.60                            | 10.40  | 11.50 | 10.20  | 12.20 | 12.10  | 13.40  | 14.60  | 15.20  | 16.20  | 15.30 | 15.60 |
| 1995                  | 17.00                            | 14.50  | 16.50 | 17.50  | 17.50 | 14.00  | 13.00  | 13.00  | 13.00  | 14.00  | 14.00 | 14.00 |
| <b>CAULIFLOWER</b>    |                                  |        |       |        |       |        |        |        |        |        |       |       |
| 1993                  | 34.30                            | 29.10  | 24.70 | 44.90  | 26.90 | 37.00  | 27.70  | 27.20  | 38.40  | 25.90  | 21.60 | 30.90 |
| 1994                  | 24.80                            | 24.90  | 23.10 | 20.80  | 32.20 | 29.10  | 30.20  | 22.50  | 33.20  | 30.50  | 42.50 | 29.80 |
| 1995                  | 23.70                            | 33.30  | 53.60 | 33.00  | 25.50 | 26.30  | 18.50  | 30.30  | 26.70  | 22.60  | 22.00 | 55.00 |
| <b>CELERY</b>         |                                  |        |       |        |       |        |        |        |        |        |       |       |
| 1993                  | 24.60                            | 36.60  | 27.40 | 16.50  | 12.60 | 8.30   | 8.71   | 10.40  | 14.00  | 13.20  | 11.40 | 10.90 |
| 1994                  | 11.20                            | 9.01   | 7.65  | 8.40   | 13.80 | 8.69   | 12.10  | 14.70  | 11.90  | 11.50  | 13.90 | 25.50 |
| 1995                  | 24.10                            | 25.80  | 20.40 | 33.10  | 24.30 | 14.20  | 11.10  | 10.20  | 16.60  | 12.90  | 12.70 | 11.40 |
| <b>SWEET CORN</b>     |                                  |        |       |        |       |        |        |        |        |        |       |       |
| 1993                  | ---                              | ---    | ---   | ---    | 19.70 | 19.90  | 19.60  | 13.90  | 14.50  | 16.90  | 15.10 | 29.70 |
| 1994                  | ---                              | ---    | ---   | 22.10  | 20.50 | 18.10  | 20.60  | 11.90  | 15.30  | 22.50  | 22.10 | 30.60 |
| 1995                  | ---                              | ---    | ---   | 21.20  | 19.90 | 19.00  | 19.70  | 15.50  | 16.10  | 22.30  | 20.90 | 26.00 |
| <b>HONEYDEW MELON</b> |                                  |        |       |        |       |        |        |        |        |        |       |       |
| 1993                  | ---                              | ---    | ---   | ---    | 26.60 | 19.40  | 15.20  | 14.60  | 16.40  | 21.30  | 22.10 | ---   |
| 1994                  | ---                              | ---    | ---   | ---    | 27.30 | 19.30  | 14.20  | 13.00  | 15.70  | 22.50  | 21.30 | ---   |
| 1995                  | ---                              | ---    | ---   | ---    | 23.50 | 27.60  | 22.00  | 16.90  | 13.70  | 21.20  | 18.40 | ---   |
| <b>HEAD LETTUCE</b>   |                                  |        |       |        |       |        |        |        |        |        |       |       |
| 1993                  | 10.00                            | 18.70  | 13.10 | 39.10  | 12.50 | 11.40  | 19.00  | 15.60  | 16.90  | 12.20  | 11.20 | 9.37  |
| 1994                  | 7.70                             | 11.50  | 9.99  | 11.80  | 11.40 | 13.70  | 10.30  | 10.90  | 17.40  | 21.90  | 21.20 | 39.10 |
| 1995                  | 14.20                            | 9.87   | 41.20 | 48.50  | 48.50 | 15.60  | 12.50  | 16.50  | 25.90  | 15.00  | 12.30 | 12.00 |
| <b>SPRING ONIONS</b>  |                                  |        |       |        |       |        |        |        |        |        |       |       |
| 1993                  | ---                              | ---    | ---   | 34.00  | 24.60 | 9.47   | 10.90  | ---    | ---    | ---    | ---   | ---   |
| 1994                  | ---                              | ---    | ---   | 8.03   | 7.15  | 7.86   | 10.20  | ---    | ---    | ---    | ---   | ---   |
| 1995                  | ---                              | ---    | ---   | 18.60  | 15.60 | 9.30   | 11.40  | ---    | ---    | ---    | ---   | ---   |
| <b>SUMMER ONIONS</b>  |                                  |        |       |        |       |        |        |        |        |        |       |       |
| 1993                  | 26.10                            | 28.40  | 27.20 | ---    | ---   | ---    | 10.90  | 12.40  | 11.50  | 11.00  | 18.00 | 22.40 |
| 1994                  | 26.70                            | 29.40  | 22.60 | ---    | ---   | ---    | 10.20  | 7.23   | 8.06   | 11.00  | 15.40 | 13.10 |
| 1995                  | 25.00                            | 25.00  | 25.00 | ---    | ---   | ---    | 11.40  | 9.50   | 12.10  | 14.10  | 15.00 | ---   |
| <b>TOMATOES</b>       |                                  |        |       |        |       |        |        |        |        |        |       |       |
| 1993                  | ---                              | ---    | ---   | ---    | 73.10 | 23.10  | 17.00  | 32.20  | 28.00  | 18.20  | 37.30 | ---   |
| 1994                  | ---                              | ---    | ---   | ---    | 24.10 | 28.40  | 23.30  | 27.40  | 19.10  | 25.70  | 28.80 | ---   |
| 1995                  | ---                              | ---    | ---   | ---    | ---   | 32.80  | 17.10  | 12.70  | 17.20  | 20.20  | 22.70 | ---   |

1/ Prices are F.O.B. shipping point.
