# Supplementary material for: The Elephant in the room: What can we learn from California regarding the use of sport hunting of pumas (Puma concolor) as a management tool?
Source: PLOS journal article supplement (doi:10.1371/journal.pone.0224638), 2020-02-13
Supplement: S3 (10.1371/journal.pone.0224638.s003) [file journal.pone.0224638.s003]

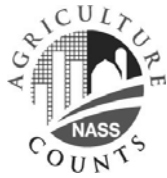

# NASS

FACT FINDERS FOR AGRICULTURE  
UNITED STATES DEPARTMENT OF AGRICULTURE

Washington, D.C.

# Cattle Death Loss

---

Released May 5, 2006, by the National Agricultural Statistics Service (NASS), Agricultural Statistics Board, U.S. Department of Agriculture. For information on *Cattle Death Loss* call Mike Miller at 202-720-3040, office hours 7:30 a.m. to 4:00 p.m. ET.

## Cattle and Calf Death Losses

**Cattle and calf** losses from animal predators and non-predator causes in the United States totaled 4.05 million head (excluding Alaska). This report provides detailed breakouts of cattle and calf losses by predators and non-predator causes, as well as data on non-lethal predator control measures.

Cattle and calf losses from animal predators totaled 190,000 head. This represented 4.7 percent of the total losses from all causes and resulted in a loss of \$92.7 million to farmers and ranchers. Coyotes and dogs caused the majority of cattle and calf losses accounting for 51.1 percent and 11.5 percent respectively.

Cattle and calf losses from non-predator causes totaled 3.86 million head or 95.3 percent of the total losses. Respiratory problems was the leading cause of non-predator deaths accounting for 28.7 percent, followed by digestive problems at 16.8 percent.

Farmers and ranchers throughout the United States spent 199.1 million dollars on non-lethal methods to control predators. Use of guard animals was the most common method at 38.0 percent. Exclusion fencing, frequent checking, and culling were the next most commonly used methods of preventing cattle and calf losses at 34.0 percent, 21.8 percent, and 19.6 percent respectively.

This report is released as a cooperative effort between the National Agricultural Statistics Service and Animal and Plant Health Inspection Service - Wildlife Services and Veterinary Services.

## Contents

## Page

|                                                                        |    |
|------------------------------------------------------------------------|----|
| Number and Value of Losses of Cattle and Calves .....                  | 1  |
| Losses of Cattle and Calves by Predators and Non-Predator Causes ..... | 2  |
| Losses of Cattle and Calves Value per Head and Total Value .....       | 3  |
| Losses of Cattle and Calves by Predators .....                         | 4  |
| Losses of Cattle and Calves from Non-Predator Causes .....             | 7  |
| Non-Lethal Prevention Methods .....                                    | 13 |
| Reliability of Cattle and Calves Predator Loss Estimates .....         | 15 |
| Information Contacts .....                                             | 15 |



**Losses of Cattle and Calves: Predator and Non-Predator  
Number of Head and Total Value, United States, 2005 <sup>1</sup>**

| Cause                                    | Number<br>of Head | % of Total     | Total<br>Value       |
|------------------------------------------|-------------------|----------------|----------------------|
|                                          | <i>Number</i>     | <i>Percent</i> | <i>1,000 Dollars</i> |
| Predator                                 |                   |                |                      |
| Coyotes                                  | 97,000            | 51.1           | 43,911               |
| Dogs                                     | 21,900            | 11.5           | 10,786               |
| Mountain Lions<br>& Bobcats <sup>2</sup> | 14,700            | 7.7            | 7,590                |
| Vultures <sup>3</sup>                    | 8,600             | 4.5            | 3,807                |
| Wolves                                   | 4,400             | 2.3            | 2,087                |
| Bears                                    | 2,800             | 1.5            | 1,453                |
| Other Predators                          | 9,300             | 4.9            | 5,735                |
| Unknown Predators <sup>4</sup>           | 31,300            | 16.5           | 17,305               |
| Total Predator                           | 190,000           | 100.0          | 92,674               |
| Non-Predator                             |                   |                |                      |
| Digestive Problems                       | 648,000           | 16.8           | 367,441              |
| Respiratory Problems                     | 1,110,000         | 28.7           | 692,430              |
| Metabolic Problems                       | 78,000            | 2.0            | 64,991               |
| Mastitis                                 | 67,000            | 1.7            | 64,695               |
| Other Diseases                           | 174,000           | 4.5            | 124,833              |
| Lameness/Injury                          | 132,000           | 3.4            | 104,427              |
| Weather Related                          | 275,000           | 7.1            | 172,491              |
| Calving Problems                         | 572,000           | 14.8           | 328,193              |
| Poisoning                                | 39,000            | 1.0            | 28,736               |
| Theft                                    | 21,000            | 0.5            | 13,920               |
| Other Non-Predator                       | 271,000           | 7.0            | 225,066              |
| Unknown Non-Predator                     | 474,000           | 12.3           | 311,352              |
| Total Non-Predator                       | 3,861,000         | 100.0          | 2,498,575            |
| US Total                                 | 4,051,000         | 100.0          | 2,591,249            |

<sup>1</sup> Totals may not add due to rounding. Cattle includes all cows, bulls, steers, and heifers weighing over 500 pounds. This includes beef and milk breeds as well as cattle on feed. Calves include beef and milk breed steers, heifers, and bulls weighing less than 500 pounds.

<sup>2</sup> Includes cougars, pumas, and lynx.

<sup>3</sup> Reports of death loss to cattle/calves by vultures is primarily due to black vultures and will occur only in states where this species ranges. See range map of black vultures at: [http://www.birds.cornell.edu/AllAboutBirds/BirdGuide/Black\\_Vulture\\_dtl.html#map](http://www.birds.cornell.edu/AllAboutBirds/BirdGuide/Black_Vulture_dtl.html#map).

<sup>4</sup> The category of unknown predators was not included in the "Cattle Predator Loss" report released May 2001.

**Losses of Cattle and Calves: By All Causes, Predators and Non-Predators,  
Number by State and United States, 2005 <sup>1</sup>**

| State | All Causes  |             | Predators   |             | Non-Predators |             |
|-------|-------------|-------------|-------------|-------------|---------------|-------------|
|       | Cattle      | Calves      | Cattle      | Calves      | Cattle        | Calves      |
|       | <i>Head</i> | <i>Head</i> | <i>Head</i> | <i>Head</i> | <i>Head</i>   | <i>Head</i> |
| AL    | 21,000      | 28,000      | 1,500       | 5,500       | 19,500        | 22,500      |
| AZ    | 24,000      | 22,000      | 700         | 2,600       | 23,300        | 19,400      |
| AR    | 30,000      | 43,000      | 1,800       | 4,500       | 28,200        | 38,500      |
| CA    | 100,000     | 165,000     | 1,400       | 5,100       | 98,600        | 159,900     |
| CO    | 50,000      | 55,000      | 700         | 4,000       | 49,300        | 51,000      |
| CT    | 900         | 1,000       |             |             | 900           | 1,000       |
| DE    | 600         | 700         |             |             | 600           | 700         |
| FL    | 25,000      | 35,000      | 1,700       | 6,100       | 23,300        | 28,900      |
| GA    | 21,000      | 31,000      | 1,700       | 5,900       | 19,300        | 25,100      |
| HI    | 3,000       | 2,000       | 200         | 300         | 2,800         | 1,700       |
| ID    | 42,000      | 63,000      | 500         | 2,000       | 41,500        | 61,000      |
| IL    | 21,000      | 35,000      | 200         | 2,200       | 20,800        | 32,800      |
| IN    | 15,000      | 29,000      | 300         | 1,200       | 14,700        | 27,800      |
| IA    | 65,000      | 110,000     |             | 1,400       | 65,000        | 108,600     |
| KS    | 135,000     | 70,000      | 700         | 3,900       | 134,300       | 66,100      |
| KY    | 35,000      | 76,000      | 1,400       | 5,800       | 33,600        | 70,200      |
| LA    | 26,000      | 20,000      | 900         | 3,700       | 25,100        | 16,300      |
| ME    | 1,600       | 3,100       |             |             | 1,600         | 3,100       |
| MD    | 3,000       | 5,000       |             | 100         | 3,000         | 4,900       |
| MA    | 1,000       | 1,000       |             | 100         | 1,000         | 900         |
| MI    | 25,000      | 47,000      |             | 400         | 25,000        | 46,600      |
| MN    | 42,000      | 82,000      | 100         | 1,700       | 41,900        | 80,300      |
| MS    | 22,000      | 29,000      | 1,200       | 2,600       | 20,800        | 26,400      |
| MO    | 70,000      | 120,000     | 1,400       | 4,000       | 68,600        | 116,000     |
| MT    | 20,000      | 46,000      | 600         | 2,400       | 19,400        | 43,600      |
| NE    | 95,000      | 75,000      | 500         | 2,200       | 94,500        | 72,800      |
| NV    | 6,000       | 13,000      | 200         | 1,100       | 5,800         | 11,900      |
| NH    | 800         | 1,000       |             |             | 800           | 1,000       |
| NJ    | 1,000       | 1,000       |             |             | 1,000         | 1,000       |
| NM    | 26,000      | 35,000      | 2,200       | 4,800       | 23,800        | 30,200      |
| NY    | 35,000      | 50,000      | 100         | 800         | 34,900        | 49,200      |
| NC    | 15,000      | 22,000      | 500         | 1,800       | 14,500        | 20,200      |
| ND    | 12,000      | 40,000      | 500         | 2,300       | 11,500        | 37,700      |
| OH    | 22,000      | 33,000      | 400         | 1,900       | 21,600        | 31,100      |
| OK    | 100,000     | 135,000     | 2,000       | 9,600       | 98,000        | 125,400     |
| OR    | 23,000      | 42,000      | 400         | 4,100       | 22,600        | 37,900      |
| PA    | 33,000      | 45,000      | 1,000       | 2,000       | 32,000        | 43,000      |
| RI    | 100         | 200         |             |             | 100           | 200         |
| SC    | 6,000       | 10,000      | 200         | 1,400       | 5,800         | 8,600       |
| SD    | 53,000      | 85,000      | 300         | 2,300       | 52,700        | 82,700      |
| TN    | 38,000      | 63,000      | 1,200       | 5,400       | 36,800        | 57,600      |
| TX    | 300,000     | 270,000     | 4,100       | 35,000      | 295,900       | 235,000     |
| UT    | 15,000      | 26,000      | 100         | 2,500       | 14,900        | 23,500      |
| VT    | 6,000       | 8,000       | 100         | 200         | 5,900         | 7,800       |
| VA    | 27,000      | 56,000      | 1,400       | 3,800       | 25,600        | 52,200      |
| WA    | 21,000      | 23,000      | 900         | 1,600       | 20,100        | 21,400      |
| WV    | 7,000       | 11,000      | 100         | 1,500       | 6,900         | 9,500       |
| WI    | 65,000      | 140,000     | 300         | 2,700       | 64,700        | 137,300     |
| WY    | 11,000      | 31,000      | 500         | 3,500       | 10,500        | 27,500      |
| US    | 1,717,000   | 2,334,000   | 34,000      | 156,000     | 1,683,000     | 2,178,000   |

<sup>1</sup> Totals may not add due to rounding.

**Losses of Cattle and Calves from Predators and Non-Predator Causes:  
Total Value per Head and Total Value, by State and United States, 2005 <sup>1</sup>**

| State           | Value per Head      |                     | Total Value<br>Predator<br>Losses |                      | Total Value<br>Non-Predator<br>Losses |                      |
|-----------------|---------------------|---------------------|-----------------------------------|----------------------|---------------------------------------|----------------------|
|                 | Cattle <sup>2</sup> | Calves <sup>3</sup> | Cattle                            | Calves               | Cattle                                | Calves               |
|                 | <i>Dollars</i>      | <i>Dollars</i>      | <i>1,000 Dollars</i>              | <i>1,000 Dollars</i> | <i>1,000 Dollars</i>                  | <i>1,000 Dollars</i> |
| AL              | 864                 | 381                 | 1,296                             | 2,096                | 16,848                                | 8,573                |
| AZ              | 873                 | 378                 | 611                               | 983                  | 20,341                                | 7,333                |
| AR              | 905                 | 387                 | 1,629                             | 1,742                | 25,521                                | 14,900               |
| CA              | 962                 | 363                 | 1,347                             | 1,851                | 94,853                                | 58,044               |
| CO              | 1,045               | 408                 | 732                               | 1,632                | 51,519                                | 20,808               |
| CT              | 996                 | 300                 |                                   |                      | 896                                   | 300                  |
| DE              | 996                 | 330                 |                                   |                      | 598                                   | 231                  |
| FL              | 836                 | 390                 | 1,421                             | 2,379                | 19,479                                | 11,271               |
| GA              | 791                 | 375                 | 1,345                             | 2,213                | 15,266                                | 9,413                |
| HI              | 483                 | 288                 | 97                                | 86                   | 1,352                                 | 490                  |
| ID              | 985                 | 378                 | 493                               | 756                  | 40,878                                | 23,058               |
| IL              | 989                 | 363                 | 198                               | 799                  | 20,571                                | 11,906               |
| IN              | 1,007               | 351                 | 302                               | 421                  | 14,803                                | 9,758                |
| IA              | 1,080               | 393                 |                                   | 550                  | 70,200                                | 42,680               |
| KS              | 1,042               | 420                 | 729                               | 1,638                | 139,941                               | 27,762               |
| KY              | 917                 | 369                 | 1,284                             | 2,140                | 30,811                                | 25,904               |
| LA              | 869                 | 369                 | 782                               | 1,365                | 21,812                                | 6,015                |
| ME              | 996                 | 315                 |                                   |                      | 1,594                                 | 977                  |
| MD              | 996                 | 330                 |                                   | 33                   | 2,988                                 | 1,617                |
| MA              | 996                 | 300                 |                                   | 30                   | 996                                   | 270                  |
| MI              | 978                 | 396                 |                                   | 158                  | 24,450                                | 18,454               |
| MN              | 970                 | 399                 | 97                                | 678                  | 40,643                                | 32,040               |
| MS              | 864                 | 369                 | 1,037                             | 959                  | 17,971                                | 9,742                |
| MO              | 991                 | 399                 | 1,387                             | 1,596                | 67,983                                | 46,284               |
| MT              | 1,129               | 414                 | 677                               | 994                  | 21,903                                | 18,050               |
| NE              | 1,119               | 426                 | 560                               | 937                  | 105,746                               | 31,013               |
| NV              | 1,030               | 411                 | 206                               | 452                  | 5,974                                 | 4,891                |
| NH              | 996                 | 315                 |                                   |                      | 797                                   | 315                  |
| NJ              | 996                 | 390                 |                                   |                      | 996                                   | 390                  |
| NM              | 991                 | 393                 | 2,180                             | 1,886                | 23,586                                | 11,869               |
| NY              | 996                 | 420                 | 100                               | 336                  | 34,760                                | 20,664               |
| NC              | 864                 | 357                 | 432                               | 643                  | 12,528                                | 7,211                |
| ND              | 1,153               | 405                 | 577                               | 932                  | 13,260                                | 15,269               |
| OH              | 866                 | 354                 | 346                               | 673                  | 18,706                                | 11,009               |
| OK              | 918                 | 396                 | 1,836                             | 3,802                | 89,964                                | 49,658               |
| OR              | 966                 | 357                 | 386                               | 1,464                | 21,832                                | 13,530               |
| PA              | 895                 | 396                 | 895                               | 792                  | 28,640                                | 17,028               |
| RI              | 996                 | 300                 |                                   |                      | 100                                   | 60                   |
| SC              | 864                 | 369                 | 173                               | 517                  | 5,011                                 | 3,173                |
| SD              | 1,163               | 411                 | 349                               | 945                  | 61,290                                | 33,990               |
| TN              | 891                 | 366                 | 1,069                             | 1,976                | 32,789                                | 21,082               |
| TX              | 913                 | 408                 | 3,743                             | 14,280               | 270,157                               | 95,880               |
| UT              | 1,030               | 402                 | 103                               | 1,005                | 15,347                                | 9,447                |
| VT              | 996                 | 315                 | 100                               | 63                   | 5,876                                 | 2,457                |
| VA              | 854                 | 366                 | 1,196                             | 1,391                | 21,862                                | 19,105               |
| WA              | 1,030               | 375                 | 927                               | 600                  | 20,703                                | 8,025                |
| WV              | 996                 | 336                 | 100                               | 504                  | 6,872                                 | 3,192                |
| WI              | 959                 | 489                 | 288                               | 1,320                | 62,047                                | 67,140               |
| WY              | 1,113               | 420                 | 557                               | 1,470                | 11,687                                | 11,550               |
| US <sup>4</sup> | 970                 | 396                 | 31,587                            | 61,087               | 1,634,747                             | 863,828              |

<sup>1</sup> Missing data are less than 100 head for the State or not published to avoid disclosure of individual operations. This data is included in the Unpublished States and in the United States.

<sup>2</sup> Cattle value per head is based on a two-year straight average of the value of beef cows reported in the January 1 Cattle survey from 2005 and 2006.

<sup>3</sup> Calf value per head is based on the market year average calf price. An average weight of 300 pounds was used in all States.

<sup>4</sup> U.S. value per head rounded to the nearest dollar. U.S. value per head derived. Totals may not add due to rounding.

**Losses of Cattle and Calves: Number and Percent by Coyotes and Dogs,  
by State and United States, 2005<sup>1</sup>**

| State<br>State | Coyotes     |                     |             |                     | Dogs        |                     |             |                     |
|----------------|-------------|---------------------|-------------|---------------------|-------------|---------------------|-------------|---------------------|
|                | Cattle      | % Total<br>Predator | Calves      | % Total<br>Predator | Cattle      | % Total<br>Predator | Calves      | % Total<br>Predator |
|                | <i>Head</i> | <i>Percent</i>      | <i>Head</i> | <i>Percent</i>      | <i>Head</i> | <i>Percent</i>      | <i>Head</i> | <i>Percent</i>      |
| AL             | 500         | 33.3                | 3,200       | 58.2                | 300         | 20.0                | 1,000       | 18.2                |
| AZ             |             |                     | 600         | 23.1                |             |                     | 200         | 7.7                 |
| AR             | 400         | 22.2                | 1,800       | 40.0                | 100         | 5.6                 | 600         | 13.3                |
| CA             | 100         | 7.1                 | 3,000       | 58.8                | 200         | 14.3                | 600         | 11.8                |
| CO             | 500         | 71.4                | 2,300       | 57.5                |             |                     | 200         | 5.0                 |
| CT             |             |                     |             |                     |             |                     |             |                     |
| DE             |             |                     |             |                     |             |                     |             |                     |
| FL             | 700         | 41.2                | 3,600       | 59.0                |             |                     | 500         | 8.2                 |
| GA             | 1,200       | 70.6                | 3,400       | 57.6                | 100         | 5.9                 | 700         | 11.9                |
| HI             |             |                     |             |                     | 100         | 50.0                | 200         | 66.7                |
| ID             |             |                     | 600         | 30.0                |             |                     | 100         | 5.0                 |
| IL             | 100         | 50.0                | 1,100       | 50.0                | 100         | 50.0                | 300         | 13.6                |
| IN             | 100         | 33.3                | 1,000       | 83.3                |             |                     | 100         | 8.3                 |
| IA             |             |                     | 1,100       | 78.6                |             |                     | 100         | 7.1                 |
| KS             | 400         | 57.1                | 2,000       | 51.3                | 100         | 14.3                | 700         | 17.9                |
| KY             | 400         | 28.6                | 3,700       | 63.8                | 300         | 21.4                | 400         | 6.9                 |
| LA             |             |                     | 2,400       | 64.9                | 600         | 66.7                | 400         | 10.8                |
| ME             |             |                     |             |                     |             |                     |             |                     |
| MD             |             |                     |             |                     |             |                     |             |                     |
| MA             |             |                     | 100         | 100.0               |             |                     |             |                     |
| MI             |             |                     | 200         | 50.0                |             |                     |             |                     |
| MN             |             |                     | 700         | 41.2                |             |                     |             |                     |
| MS             |             |                     | 600         | 23.1                | 100         | 8.3                 | 700         | 26.9                |
| MO             |             |                     | 1,100       | 27.5                | 600         | 42.9                | 1,500       | 37.5                |
| MT             |             |                     | 1,300       | 54.2                |             |                     | 100         | 4.2                 |
| NE             | 200         | 40.0                | 1,700       | 77.3                |             |                     | 100         | 4.5                 |
| NV             | 100         | 50.0                | 1,000       | 90.9                |             |                     |             |                     |
| NH             |             |                     |             |                     |             |                     |             |                     |
| NJ             |             |                     |             |                     |             |                     |             |                     |
| NM             | 900         | 40.9                | 1,900       | 39.6                | 100         | 4.5                 | 200         | 4.2                 |
| NY             | 100         | 100.0               | 700         | 87.5                |             |                     |             |                     |
| NC             | 400         | 80.0                | 900         | 50.0                |             |                     | 600         | 33.3                |
| ND             | 100         | 20.0                | 1,700       | 73.9                |             |                     |             |                     |
| OH             | 100         | 25.0                | 1,100       | 57.9                |             |                     | 300         | 15.8                |
| OK             | 800         | 40.0                | 4,300       | 44.8                | 200         | 10.0                | 2,300       | 24.0                |
| OR             | 100         | 25.0                | 2,200       | 53.7                |             |                     |             |                     |
| PA             |             |                     | 300         | 15.0                |             |                     |             |                     |
| RI             |             |                     |             |                     |             |                     |             |                     |
| SC             | 200         | 100.0               | 800         | 57.1                |             |                     | 100         | 7.1                 |
| SD             | 200         | 66.7                | 1,700       | 73.9                |             |                     | 200         | 8.7                 |
| TN             | 600         | 50.0                | 3,500       | 64.8                |             |                     | 1,100       | 20.4                |
| TX             | 1,700       | 41.5                | 21,000      | 60.0                | 600         | 14.6                | 2,900       | 8.3                 |
| UT             |             |                     | 1,600       | 64.0                |             |                     |             |                     |
| VT             |             |                     | 100         | 50.0                |             |                     |             |                     |
| VA             | 600         | 42.9                | 1,700       | 44.7                | 200         | 14.3                | 1,000       | 26.3                |
| WA             |             |                     | 600         | 37.5                |             |                     |             |                     |
| WV             |             |                     | 1,300       | 86.7                |             |                     |             |                     |
| WI             |             |                     | 2,000       | 74.1                |             |                     |             |                     |
| WY             | 100         | 20.0                | 2,100       | 60.0                |             |                     | 100         | 2.9                 |
| Unpub          | 400         |                     |             |                     | 700         |                     | 200         |                     |
| US             | 11,000      | 32.4                | 86,000      | 55.1                | 4,400       | 12.9                | 17,500      | 11.2                |

<sup>1</sup> Missing data are less than 100 head for the State or not published to avoid disclosure of individual operations. This data is included in Unpublished States and in United States. Totals may not add due to rounding.

**Losses of Cattle and Calves: Number and Percent by Mountain Lions,  
Bobcats and Other Predators, by State and United States, 2005 <sup>1</sup>**

| State<br>State | Mountain Lions and Bobcats |                     |             |                     | Other Predators |                     |             |                     |
|----------------|----------------------------|---------------------|-------------|---------------------|-----------------|---------------------|-------------|---------------------|
|                | Cattle                     | % Total<br>Predator | Calves      | % Total<br>Predator | Cattle          | % Total<br>Predator | Calves      | % Total<br>Predator |
|                | <i>Head</i>                | <i>Percent</i>      | <i>Head</i> | <i>Percent</i>      | <i>Head</i>     | <i>Percent</i>      | <i>Head</i> | <i>Percent</i>      |
| AL             |                            |                     |             |                     | 100             | 6.7                 | 400         | 7.3                 |
| AZ             | 100                        | 14.3                | 1,200       | 46.2                |                 |                     | 100         | 3.8                 |
| AR             | 100                        | 5.6                 | 300         | 6.7                 | 100             | 5.6                 | 300         | 6.7                 |
| CA             | 1,000                      | 71.4                | 1,300       | 25.5                |                 |                     |             |                     |
| CO             |                            |                     | 600         | 15.0                | 100             | 14.3                | 200         | 5.0                 |
| CT             |                            |                     |             |                     |                 |                     |             |                     |
| DE             |                            |                     |             |                     |                 |                     |             |                     |
| FL             |                            |                     |             |                     | 700             | 41.2                | 1,100       | 18.0                |
| GA             |                            |                     |             |                     | 100             | 5.9                 | 400         | 6.8                 |
| HI             |                            |                     |             |                     |                 |                     |             |                     |
| ID             |                            |                     | 200         | 10.0                | 400             | 80.0                | 600         | 30.0                |
| IL             |                            |                     |             |                     |                 |                     |             |                     |
| IN             |                            |                     |             |                     | 100             | 33.3                |             |                     |
| IA             |                            |                     |             |                     |                 |                     |             |                     |
| KS             |                            |                     | 500         | 12.8                |                 |                     | 100         | 2.6                 |
| KY             |                            |                     |             |                     | 200             | 14.3                | 200         | 3.4                 |
| LA             |                            |                     |             |                     |                 |                     | 300         | 8.1                 |
| ME             |                            |                     |             |                     |                 |                     |             |                     |
| MD             |                            |                     |             |                     |                 |                     |             |                     |
| MA             |                            |                     |             |                     |                 |                     |             |                     |
| MI             |                            |                     |             |                     |                 |                     | 200         | 50.0                |
| MN             |                            |                     |             |                     |                 |                     | 800         | 47.1                |
| MS             |                            |                     |             |                     |                 |                     | 200         | 7.7                 |
| MO             |                            |                     | 200         | 5.0                 | 700             | 50.0                | 1,000       | 25.0                |
| MT             |                            |                     | 200         | 8.3                 | 200             | 33.3                | 500         | 20.8                |
| NE             | 100                        | 20.0                | 200         | 9.1                 |                 |                     |             |                     |
| NV             |                            |                     | 100         | 9.1                 |                 |                     |             |                     |
| NH             |                            |                     |             |                     |                 |                     |             |                     |
| NJ             |                            |                     |             |                     |                 |                     |             |                     |
| NM             | 700                        | 31.8                | 1,700       | 35.4                | 200             | 9.1                 | 200         | 4.2                 |
| NY             |                            |                     |             |                     |                 |                     |             |                     |
| NC             |                            |                     |             |                     |                 |                     | 200         | 11.1                |
| ND             |                            |                     |             |                     |                 |                     |             |                     |
| OH             |                            |                     |             |                     |                 |                     | 300         | 15.8                |
| OK             | 100                        | 5.0                 | 700         | 7.3                 | 400             | 20.0                | 1,500       | 15.6                |
| OR             | 200                        | 50.0                | 1,300       | 31.7                |                 |                     |             |                     |
| PA             |                            |                     |             |                     |                 |                     | 200         | 10.0                |
| RI             |                            |                     |             |                     |                 |                     |             |                     |
| SC             |                            |                     |             |                     |                 |                     |             |                     |
| SD             |                            |                     | 200         | 8.7                 |                 |                     |             |                     |
| TN             |                            |                     |             |                     |                 |                     | 300         | 5.6                 |
| TX             | 200                        | 4.9                 | 1,000       | 2.9                 | 700             | 17.1                | 6,900       | 19.7                |
| UT             |                            |                     | 300         | 12.0                |                 |                     | 500         | 20.0                |
| VT             |                            |                     |             |                     |                 |                     |             |                     |
| VA             |                            |                     |             |                     | 400             | 28.6                | 600         | 15.8                |
| WA             | 200                        | 22.2                | 600         | 37.5                | 300             | 33.3                | 300         | 18.8                |
| WV             |                            |                     |             |                     |                 |                     | 200         | 13.3                |
| WI             |                            |                     |             |                     | 200             | 66.7                | 600         | 22.2                |
| WY             | 100                        | 20.0                | 400         | 11.4                | 300             | 60.0                | 900         | 25.7                |
| Unpub          | 400                        |                     | 500         |                     | 400             |                     | 400         |                     |
| US             | 3,200                      | 9.4                 | 11,500      | 7.4                 | 5,600           | 16.5                | 19,500      | 12.5                |

<sup>1</sup> Missing data are less than 100 head for the State or not published to avoid disclosure of individual operations. Data not published are included in U.S. total. Totals may not add due to rounding.

<sup>2</sup> Includes cougars, pumas, and lynx.



**Losses of Cattle and Calves: Number and Percent by Unknown Predators,  
by State and United States, 2005 <sup>1</sup>**

| State | Unknown Predators |                         |             |                         |
|-------|-------------------|-------------------------|-------------|-------------------------|
|       | Cattle            | %<br>Total<br>Predators | Calves      | %<br>Total<br>Predators |
|       | <i>Head</i>       | <i>Percent</i>          | <i>Head</i> | <i>Percent</i>          |
| AL    | 600               | 40.0                    | 900         | 16.4                    |
| AZ    | 500               | 71.4                    | 500         | 19.2                    |
| AR    | 1,100             | 61.1                    | 1,500       | 33.3                    |
| CA    | 100               | 7.1                     | 200         | 3.9                     |
| CO    |                   |                         | 700         | 17.5                    |
| CT    |                   |                         |             |                         |
| DE    |                   |                         |             |                         |
| FL    | 200               | 11.8                    | 900         | 14.8                    |
| GA    | 300               | 17.6                    | 1,400       | 23.7                    |
| HI    |                   |                         | 100         | 33.3                    |
| ID    | 100               | 20.0                    | 500         | 25.0                    |
| IL    |                   |                         | 600         | 27.3                    |
| IN    |                   |                         |             |                         |
| IA    |                   |                         |             |                         |
| KS    |                   |                         | 600         | 15.4                    |
| KY    | 500               | 35.7                    | 1,500       | 25.9                    |
| LA    | 100               | 11.1                    | 600         | 16.2                    |
| ME    |                   |                         |             |                         |
| MD    |                   |                         |             |                         |
| MA    |                   |                         |             |                         |
| MI    |                   |                         |             |                         |
| MN    |                   |                         | 200         | 11.8                    |
| MS    | 1,000             | 83.3                    | 1,100       | 42.3                    |
| MO    |                   |                         | 200         | 5.0                     |
| MT    | 200               | 33.3                    | 300         | 12.5                    |
| NE    |                   |                         |             |                         |
| NV    |                   |                         |             |                         |
| NH    |                   |                         |             |                         |
| NJ    |                   |                         |             |                         |
| NM    | 300               | 13.6                    | 800         | 16.7                    |
| NY    |                   |                         |             |                         |
| NC    | 100               | 20.0                    | 100         | 5.6                     |
| ND    | 400               | 80.0                    | 500         | 21.7                    |
| OH    | 300               | 75.0                    | 200         | 10.5                    |
| OK    | 500               | 25.0                    | 800         | 8.3                     |
| OR    |                   |                         | 500         | 12.2                    |
| PA    | 1,000             | 100.0                   | 1,500       | 75.0                    |
| RI    |                   |                         |             |                         |
| SC    |                   |                         | 400         | 28.6                    |
| SD    |                   |                         | 200         | 8.7                     |
| TN    | 400               | 33.3                    | 500         | 9.3                     |
| TX    | 900               | 22.0                    | 3,200       | 9.1                     |
| UT    |                   |                         | 100         | 4.0                     |
| VT    |                   |                         |             |                         |
| VA    | 200               | 14.3                    | 500         | 13.2                    |
| WA    | 400               | 44.4                    | 100         | 6.3                     |
| WV    |                   |                         |             |                         |
| WI    |                   |                         | 100         | 3.7                     |
| WY    |                   |                         |             |                         |
| Unpub | 600               |                         | 200         |                         |
| US    | 9,800             | 28.8                    | 21,500      | 13.8                    |

<sup>1</sup> Missing data are less than 100 head for the State or not published to avoid disclosure of individual operations. This data is included in Unpublished States and in United States. Totals may not add due to rounding.

**Losses of Cattle and Calves: Number and Percent from Digestive  
and Respiratory Problems, by State and United States, 2005 <sup>1</sup>**

| State | Digestive Problems |                     |             |                     | Respiratory Problems |                     |             |                     |
|-------|--------------------|---------------------|-------------|---------------------|----------------------|---------------------|-------------|---------------------|
|       | Cattle             | % Total<br>Non-Pred | Calves      | % Total<br>Non Pred | Cattle               | % Total<br>Non-Pred | Calves      | % Total<br>Non-Pred |
|       | <i>Head</i>        | <i>Percent</i>      | <i>Head</i> | <i>Percent</i>      | <i>Head</i>          | <i>Percent</i>      | <i>Head</i> | <i>Percent</i>      |
| AL    | 1,700              | 8.7                 | 1,300       | 5.8                 | 1,600                | 8.2                 | 4,600       | 20.4                |
| AZ    | 1,900              | 8.2                 | 4,400       | 22.7                | 1,300                | 5.6                 | 4,900       | 25.3                |
| AR    | 1,700              | 6.0                 | 3,800       | 9.9                 | 4,500                | 16.0                | 11,300      | 29.4                |
| CA    | 15,000             | 15.2                | 62,000      | 38.8                | 20,500               | 20.8                | 61,000      | 38.1                |
| CO    | 7,800              | 15.8                | 10,500      | 20.6                | 16,600               | 33.7                | 15,200      | 29.8                |
| CT    |                    |                     | 300         | 30.0                |                      |                     | 300         | 30.0                |
| DE    |                    |                     |             |                     |                      |                     |             |                     |
| FL    | 1,900              | 8.2                 | 5,100       | 17.6                | 2,100                | 9.0                 | 6,100       | 21.1                |
| GA    | 1,200              | 6.2                 | 4,200       | 16.7                | 2,600                | 13.5                | 6,200       | 24.7                |
| HI    |                    |                     |             |                     |                      |                     |             |                     |
| ID    | 3,200              | 7.7                 | 20,000      | 32.8                | 6,900                | 16.6                | 19,600      | 32.1                |
| IL    | 2,300              | 11.1                | 8,600       | 26.2                | 5,500                | 26.4                | 10,600      | 32.3                |
| IN    | 1,700              | 11.6                | 6,800       | 24.5                | 3,100                | 21.1                | 11,200      | 40.3                |
| IA    | 9,500              | 14.6                | 25,000      | 23.0                | 27,000               | 41.5                | 32,000      | 29.5                |
| KS    | 28,500             | 21.2                | 6,600       | 10.0                | 77,200               | 57.5                | 28,000      | 42.4                |
| KY    | 1,600              | 4.8                 | 13,300      | 18.9                | 5,800                | 17.3                | 18,800      | 26.8                |
| LA    | 800                | 3.2                 | 900         | 5.5                 | 1,600                | 6.4                 | 3,900       | 23.9                |
| ME    | 200                | 12.5                | 900         | 29.0                | 200                  | 12.5                | 1,100       | 35.5                |
| MD    | 200                | 6.7                 | 500         | 10.2                | 500                  | 16.7                | 1,800       | 36.7                |
| MA    |                    |                     | 200         | 22.2                |                      |                     | 300         | 33.3                |
| MI    | 3,400              | 13.6                | 17,200      | 36.9                | 5,300                | 21.2                | 14,100      | 30.3                |
| MN    | 4,300              | 10.3                | 28,700      | 35.7                | 9,600                | 22.9                | 22,200      | 27.6                |
| MS    | 800                | 3.8                 | 1,100       | 4.2                 | 2,300                | 11.1                | 5,900       | 22.3                |
| MO    | 3,000              | 4.4                 | 18,200      | 15.7                | 8,600                | 12.5                | 34,000      | 29.3                |
| MT    | 1,500              | 7.7                 | 5,500       | 12.6                | 3,100                | 16.0                | 7,800       | 17.9                |
| NE    | 9,800              | 10.4                | 11,400      | 15.7                | 43,000               | 45.5                | 24,100      | 33.1                |
| NV    | 500                | 8.6                 | 1,800       | 15.1                | 1,000                | 17.2                | 5,800       | 48.7                |
| NH    | 100                | 12.5                | 200         | 20.0                |                      |                     | 300         | 30.0                |
| NJ    | 100                | 10.0                | 200         | 20.0                |                      |                     | 200         | 20.0                |
| NM    | 1,300              | 5.5                 | 1,600       | 5.3                 | 3,300                | 13.9                | 6,100       | 20.2                |
| NY    | 5,000              | 14.3                | 11,800      | 24.0                | 4,800                | 13.8                | 22,900      | 46.5                |
| NC    | 1,600              | 11.0                | 3,400       | 16.8                | 3,500                | 24.1                | 3,300       | 16.3                |
| ND    | 900                | 7.8                 | 7,800       | 20.7                | 2,000                | 17.4                | 8,300       | 22.0                |
| OH    | 4,900              | 22.7                | 11,400      | 36.7                | 7,300                | 33.8                | 10,400      | 33.4                |
| OK    | 5,600              | 5.7                 | 9,500       | 7.6                 | 39,500               | 40.3                | 50,000      | 39.9                |
| OR    | 1,600              | 7.1                 | 9,700       | 25.6                | 7,500                | 33.2                | 12,600      | 33.2                |
| PA    | 3,200              | 10.0                | 12,600      | 29.3                | 4,400                | 13.8                | 14,000      | 32.6                |
| RI    |                    |                     |             |                     |                      |                     |             |                     |
| SC    | 400                | 6.9                 | 1,000       | 11.6                | 300                  | 5.2                 | 1,300       | 15.1                |
| SD    | 6,200              | 11.8                | 17,200      | 20.8                | 13,800               | 26.2                | 30,000      | 36.3                |
| TN    | 4,600              | 12.5                | 10,100      | 17.5                | 5,000                | 13.6                | 14,900      | 25.9                |
| TX    | 31,500             | 10.6                | 26,000      | 11.1                | 54,500               | 18.4                | 88,000      | 37.4                |
| UT    | 1,700              | 11.4                | 6,300       | 26.8                | 2,900                | 19.5                | 6,900       | 29.4                |
| VT    | 400                | 6.8                 | 2,800       | 35.9                | 400                  | 6.8                 | 2,100       | 26.9                |
| VA    | 1,500              | 5.9                 | 5,300       | 10.2                | 3,200                | 12.5                | 8,700       | 16.7                |
| WA    | 4,000              | 19.9                | 5,200       | 24.3                | 3,000                | 14.9                | 8,500       | 39.7                |
| WV    | 800                | 11.6                | 1,000       | 10.5                | 600                  | 8.7                 | 1,500       | 15.8                |
| WI    | 6,700              | 10.4                | 55,000      | 40.1                | 9,200                | 14.2                | 45,000      | 32.8                |
| WY    | 1,200              | 11.4                | 5,500       | 20.0                | 2,700                | 25.7                | 6,000       | 21.8                |
| Unpub | 200                |                     | 100         |                     | 200                  |                     | 200         |                     |
| US    | 186,000            | 11.1                | 462,000     | 21.2                | 418,000              | 24.8                | 692,000     | 31.8                |

<sup>1</sup> Missing data are less than 100 head for the State or not published to avoid disclosure of individual operations. Data not published are included in U.S. total. Totals may not add due to rounding.

**Losses of Cattle and Calves: Number and Percent from Metabolic Problems  
and Mastitis, by State and United States, 2005 <sup>1</sup>**

| State | Metabolic Problems |                     |             |                     | Mastitis    |                     |             |                     |
|-------|--------------------|---------------------|-------------|---------------------|-------------|---------------------|-------------|---------------------|
|       | Cattle             | % Total<br>Non-Pred | Calves      | % Total<br>Non-Pred | Cattle      | % Total<br>Non-Pred | Calves      | % Total<br>Non-Pred |
|       | <i>Head</i>        | <i>Percent</i>      | <i>Head</i> | <i>Percent</i>      | <i>Head</i> | <i>Percent</i>      | <i>Head</i> | <i>Percent</i>      |
| AL    | 300                | 1.5                 | 600         | 2.7                 | 200         | 1.0                 |             |                     |
| AZ    | 400                | 1.7                 |             |                     | 900         | 3.9                 |             |                     |
| AR    | 1,300              | 4.6                 | 600         | 1.6                 | 200         | 0.7                 |             |                     |
| CA    | 8,400              | 8.5                 | 2,200       | 1.4                 | 14,000      | 14.2                |             |                     |
| CO    | 600                | 1.2                 | 200         | 0.4                 | 800         | 1.6                 |             |                     |
| CT    |                    |                     |             |                     | 200         | 22.2                |             |                     |
| DE    |                    |                     |             |                     |             |                     |             |                     |
| FL    | 800                | 3.4                 | 500         | 1.7                 | 800         | 3.4                 |             |                     |
| GA    | 900                | 4.7                 | 400         | 1.6                 | 800         | 4.1                 |             |                     |
| HI    |                    |                     |             |                     |             |                     |             |                     |
| ID    | 1,800              | 4.3                 |             |                     | 1,500       | 3.6                 |             |                     |
| IL    | 800                | 3.8                 | 200         | 0.6                 | 1,000       | 4.8                 |             |                     |
| IN    | 700                | 4.8                 | 1,100       | 4.0                 | 800         | 5.4                 |             |                     |
| IA    | 800                | 1.2                 | 800         | 0.7                 | 1,300       | 2.0                 |             |                     |
| KS    | 1,700              | 1.3                 | 200         | 0.3                 | 900         | 0.7                 |             |                     |
| KY    | 1,000              | 3.0                 | 1,000       | 1.4                 | 500         | 1.5                 |             |                     |
| LA    | 200                | 0.8                 |             |                     | 300         | 1.2                 |             |                     |
| ME    |                    |                     |             |                     | 200         | 12.5                |             |                     |
| MD    | 200                | 6.7                 |             |                     | 300         | 10.0                |             |                     |
| MA    |                    |                     |             |                     | 100         | 10.0                |             |                     |
| MI    | 2,100              | 8.4                 | 100         | 0.2                 | 2,400       | 9.6                 |             |                     |
| MN    | 2,300              | 5.5                 | 400         | 0.5                 | 2,800       | 6.7                 |             |                     |
| MS    |                    |                     |             |                     | 600         | 2.9                 |             |                     |
| MO    | 1,200              | 1.7                 | 700         | 0.6                 | 800         | 1.2                 |             |                     |
| MT    | 200                | 1.0                 | 300         | 0.7                 |             |                     |             |                     |
| NE    | 800                | 0.8                 | 100         | 0.1                 |             |                     |             |                     |
| NV    | 200                | 3.4                 |             |                     | 500         | 8.6                 |             |                     |
| NH    |                    |                     |             |                     |             |                     |             |                     |
| NJ    |                    |                     |             |                     |             |                     |             |                     |
| NM    | 3,000              | 12.6                |             |                     | 5,400       | 22.7                |             |                     |
| NY    | 3,900              | 11.2                | 200         | 0.4                 | 5,600       | 16.0                |             |                     |
| NC    | 300                | 2.1                 |             |                     | 300         | 2.1                 |             |                     |
| ND    | 300                | 2.6                 | 300         | 0.8                 | 100         | 0.9                 |             |                     |
| OH    | 1,300              | 6.0                 | 800         | 2.6                 | 1,400       | 6.5                 |             |                     |
| OK    | 900                | 0.9                 | 600         | 0.5                 | 400         | 0.4                 |             |                     |
| OR    | 1,700              | 7.5                 | 300         | 0.8                 | 1,700       | 7.5                 |             |                     |
| PA    | 3,000              | 9.4                 | 1,000       | 2.3                 | 3,800       | 11.9                |             |                     |
| RI    |                    |                     |             |                     |             |                     |             |                     |
| SC    |                    |                     |             |                     |             |                     |             |                     |
| SD    | 1,400              | 2.7                 | 200         | 0.2                 | 1,900       | 3.6                 |             |                     |
| TN    | 1,700              | 4.6                 | 600         | 1.0                 | 900         | 2.4                 |             |                     |
| TX    | 2,700              | 0.9                 | 3,100       | 1.3                 | 3,500       | 1.2                 |             |                     |
| UT    | 600                | 4.0                 | 200         | 0.9                 | 700         | 4.7                 |             |                     |
| VT    | 500                | 8.5                 |             |                     | 1,000       | 16.9                |             |                     |
| VA    | 700                | 2.7                 | 100         | 0.2                 | 800         | 3.1                 |             |                     |
| WA    | 2,600              | 12.9                | 300         | 1.4                 | 1,400       | 7.0                 |             |                     |
| WV    | 400                | 5.8                 |             |                     |             |                     |             |                     |
| WI    | 7,600              | 11.7                | 500         | 0.4                 | 5,400       | 8.3                 |             |                     |
| WY    | 200                | 1.9                 |             |                     |             |                     |             |                     |
| Unpub | 500                |                     | 400         |                     | 800         |                     |             |                     |
| US    | 60,000             | 3.6                 | 18,000      | 0.8                 | 67,000      | 4.0                 |             |                     |

<sup>1</sup> Missing data are less than 100 head for the State or not published to avoid disclosure of individual operations. Data not published are included in U.S. total. Totals may not add due to rounding.

**Losses of Cattle and Calves: Number and Percent from Other Diseases  
and Lameness/Injury, by State and United States, 2005 <sup>1</sup>**

| State | Other Diseases |                     |             |                     | Lameness/Injury |                     |             |                     |
|-------|----------------|---------------------|-------------|---------------------|-----------------|---------------------|-------------|---------------------|
|       | Cattle         | % Total<br>Non-Pred | Calves      | % Total<br>Non-Pred | Cattle          | % Total<br>Non-Pred | Calves      | % Total<br>Non-Pred |
|       | <i>Head</i>    | <i>Percent</i>      | <i>Head</i> | <i>Percent</i>      | <i>Head</i>     | <i>Percent</i>      | <i>Head</i> | <i>Percent</i>      |
| AL    | 300            | 1.5                 | 1,000       | 4.4                 | 900             | 4.6                 | 800         | 3.6                 |
| AZ    | 300            | 1.3                 | 2,800       | 14.4                | 600             | 2.6                 | 300         | 1.5                 |
| AR    | 1,300          | 4.6                 | 1,300       | 3.4                 | 1,000           | 3.5                 | 900         | 2.3                 |
| CA    | 7,500          | 7.6                 | 3,500       | 2.2                 | 7,300           | 7.4                 | 7,300       | 4.6                 |
| CO    | 5,800          | 11.8                | 1,800       | 3.5                 | 4,300           | 8.7                 | 200         | 0.4                 |
| CT    |                |                     |             |                     |                 |                     |             |                     |
| DE    |                |                     |             |                     |                 |                     |             |                     |
| FL    | 1,000          | 4.3                 | 700         | 2.4                 | 700             | 3.0                 | 400         | 1.4                 |
| GA    | 600            | 3.1                 | 700         | 2.8                 | 1,400           | 7.3                 | 600         | 2.4                 |
| HI    |                |                     |             |                     |                 |                     |             |                     |
| ID    | 2,100          | 5.1                 | 2,500       | 4.1                 | 2,600           | 6.3                 | 500         | 0.8                 |
| IL    | 600            | 2.9                 | 900         | 2.7                 | 2,100           | 10.1                | 300         | 0.9                 |
| IN    | 600            | 4.1                 | 800         | 2.9                 | 900             | 6.1                 | 500         | 1.8                 |
| IA    | 2,500          | 3.8                 | 4,300       | 4.0                 | 3,100           | 4.8                 | 1,000       | 0.9                 |
| KS    | 1,900          | 1.4                 | 2,100       | 3.2                 | 1,900           | 1.4                 | 500         | 0.8                 |
| KY    | 2,200          | 6.5                 | 2,800       | 4.0                 | 1,600           | 4.8                 | 1,100       | 1.6                 |
| LA    | 1,000          | 4.0                 | 800         | 4.9                 | 600             | 2.4                 | 300         | 1.8                 |
| ME    |                |                     |             |                     | 200             | 12.5                |             |                     |
| MD    | 200            | 6.7                 | 200         | 4.1                 | 300             | 10.0                |             |                     |
| MA    |                |                     |             |                     |                 |                     |             |                     |
| MI    | 2,800          | 11.2                | 4,200       | 9.0                 | 2,000           | 8.0                 | 900         | 1.9                 |
| MN    | 2,400          | 5.7                 | 2,900       | 3.6                 | 4,100           | 9.8                 | 1,000       | 1.2                 |
| MS    | 1,100          | 5.3                 | 1,100       | 4.2                 | 700             | 3.4                 | 500         | 1.9                 |
| MO    | 4,500          | 6.6                 | 4,000       | 3.4                 | 2,300           | 3.4                 | 1,600       | 1.4                 |
| MT    | 2,200          | 11.3                | 1,100       | 2.5                 | 1,000           | 5.2                 | 600         | 1.4                 |
| NE    | 3,200          | 3.4                 | 1,000       | 1.4                 | 3,900           | 4.1                 | 800         | 1.1                 |
| NV    |                |                     | 300         | 2.5                 | 200             | 3.4                 |             |                     |
| NH    |                |                     |             |                     |                 |                     |             |                     |
| NJ    |                |                     |             |                     |                 |                     |             |                     |
| NM    | 2,200          | 9.2                 |             |                     | 300             | 1.3                 | 1,700       | 5.6                 |
| NY    | 2,800          | 8.0                 | 3,400       | 6.9                 | 4,300           | 12.3                | 700         | 1.4                 |
| NC    | 700            | 4.8                 | 400         | 2.0                 | 800             | 5.5                 | 500         | 2.5                 |
| ND    | 800            | 7.0                 | 1,000       | 2.7                 | 800             | 7.0                 | 400         | 1.1                 |
| OH    | 300            | 1.4                 | 1,000       | 3.2                 | 1,000           | 4.6                 | 300         | 1.0                 |
| OK    | 6,800          | 6.9                 | 6,000       | 4.8                 | 2,800           | 2.9                 | 1,500       | 1.2                 |
| OR    | 1,600          | 7.1                 | 800         | 2.1                 | 1,600           | 7.1                 | 1,200       | 3.2                 |
| PA    | 3,500          | 10.9                | 1,900       | 4.4                 | 3,700           | 11.6                | 1,400       | 3.3                 |
| RI    |                |                     |             |                     |                 |                     |             |                     |
| SC    | 200            | 3.4                 | 500         | 5.8                 | 300             | 5.2                 |             |                     |
| SD    | 4,900          | 9.3                 | 1,900       | 2.3                 | 3,200           | 6.1                 | 700         | 0.8                 |
| TN    | 1,000          | 2.7                 | 4,000       | 6.9                 | 2,700           | 7.3                 | 1,300       | 2.3                 |
| TX    | 20,000         | 6.8                 | 6,700       | 2.9                 | 8,900           | 3.0                 | 4,800       | 2.0                 |
| UT    | 500            | 3.4                 | 1,200       | 5.1                 | 500             | 3.4                 |             |                     |
| VT    | 400            | 6.8                 | 300         | 3.8                 | 1,200           | 20.3                | 300         | 3.8                 |
| VA    | 1,400          | 5.5                 | 1,700       | 3.3                 | 1,200           | 4.7                 | 500         | 1.0                 |
| WA    | 1,200          | 6.0                 | 400         | 1.9                 | 2,400           | 11.9                | 300         | 1.4                 |
| WV    | 300            | 4.3                 | 100         | 1.1                 |                 |                     | 200         | 2.1                 |
| WI    | 3,300          | 5.1                 | 3,600       | 2.6                 | 10,000          | 15.5                | 5,800       | 4.2                 |
| WY    | 600            | 5.7                 | 800         | 2.9                 |                 |                     |             |                     |
| Unpub | 400            |                     | 500         |                     | 600             |                     | 300         |                     |
| US    | 97,000         | 5.8                 | 77,000      | 3.5                 | 90,000          | 5.3                 | 42,000      | 1.9                 |

<sup>1</sup> Missing data are less than 100 head for the State or not published to avoid disclosure of individual operations. Data not published are included in U.S. total. Totals may not add due to rounding.

**Losses of Cattle and Calves: Number and Percent from Weather Related  
and Calving Problems, by State and United States, 2005 <sup>1</sup>**

| State | Weather Related |                     |             |                     | Calving Problems |                     |             |                     |
|-------|-----------------|---------------------|-------------|---------------------|------------------|---------------------|-------------|---------------------|
|       | Cattle          | % Total<br>Non-Pred | Calves      | % Total<br>Non-Pred | Cattle           | % Total<br>Non-Pred | Calves      | % Total<br>Non-Pred |
|       | <i>Head</i>     | <i>Percent</i>      | <i>Head</i> | <i>Percent</i>      | <i>Head</i>      | <i>Percent</i>      | <i>Head</i> | <i>Percent</i>      |
| AL    | 2,100           | 10.8                | 1,100       | 4.9                 | 4,000            | 20.5                | 5,900       | 26.2                |
| AZ    | 700             | 3.0                 | 3,000       | 15.5                | 1,100            | 4.7                 | 700         | 3.6                 |
| AR    | 1,200           | 4.3                 | 2,400       | 6.2                 | 5,700            | 20.2                | 9,900       | 25.7                |
| CA    | 2,200           | 2.2                 | 2,500       | 1.6                 | 10,300           | 10.4                | 6,400       | 4.0                 |
| CO    | 1,700           | 3.4                 | 3,400       | 6.7                 | 2,700            | 5.5                 | 14,100      | 27.6                |
| CT    |                 |                     |             |                     | 200              | 22.2                |             |                     |
| DE    |                 |                     |             |                     |                  |                     | 100         | 14.3                |
| FL    | 2,700           | 11.6                | 3,100       | 10.7                | 3,200            | 13.7                | 3,300       | 11.4                |
| GA    | 1,500           | 7.8                 | 1,800       | 7.2                 | 4,100            | 21.2                | 7,400       | 29.5                |
| HI    |                 |                     | 200         | 11.8                | 200              | 7.1                 | 100         | 5.9                 |
| ID    | 200             | 0.5                 | 1,100       | 1.8                 | 3,300            | 8.0                 | 5,900       | 9.7                 |
| IL    | 900             | 4.3                 | 3,600       | 11.0                | 3,000            | 14.4                | 5,100       | 15.5                |
| IN    | 500             | 3.4                 | 1,400       | 5.0                 | 1,800            | 12.2                | 2,900       | 10.4                |
| IA    | 3,500           | 5.4                 | 9,400       | 8.7                 | 6,500            | 10.0                | 25,000      | 23.0                |
| KS    | 7,200           | 5.4                 | 7,500       | 11.3                | 2,800            | 2.1                 | 13,200      | 20.0                |
| KY    | 2,500           | 7.4                 | 4,800       | 6.8                 | 5,400            | 16.1                | 12,500      | 17.8                |
| LA    | 12,700          | 50.6                | 6,600       | 40.5                | 2,600            | 10.4                | 2,100       | 12.9                |
| ME    |                 |                     | 300         | 9.7                 | 200              | 12.5                |             |                     |
| MD    | 200             | 6.7                 | 100         | 2.0                 | 200              | 6.7                 | 700         | 14.3                |
| MA    |                 |                     |             |                     | 200              | 20.0                |             |                     |
| MI    | 300             | 1.2                 | 1,200       | 2.6                 | 3,900            | 15.6                | 6,200       | 13.3                |
| MN    | 1,500           | 3.6                 | 4,200       | 5.2                 | 4,800            | 11.5                | 14,000      | 17.4                |
| MS    | 2,100           | 10.1                | 4,100       | 15.5                | 4,200            | 20.2                | 8,400       | 31.8                |
| MO    | 5,700           | 8.3                 | 13,300      | 11.5                | 13,000           | 19.0                | 25,100      | 21.6                |
| MT    | 1,200           | 6.2                 | 10,200      | 23.4                | 1,500            | 7.7                 | 11,300      | 25.9                |
| NE    | 13,300          | 14.1                | 12,000      | 16.5                | 2,400            | 2.5                 | 11,900      | 16.3                |
| NV    | 500             | 8.6                 | 600         | 5.0                 | 300              | 5.2                 | 600         | 5.0                 |
| NH    |                 |                     |             |                     |                  |                     | 100         | 10.0                |
| NJ    |                 |                     |             |                     | 300              | 30.0                | 400         | 40.0                |
| NM    | 400             | 1.7                 | 7,100       | 23.5                | 1,900            | 8.0                 | 7,100       | 23.5                |
| NY    | 500             | 1.4                 | 1,300       | 2.6                 | 3,700            | 10.6                | 2,600       | 5.3                 |
| NC    | 700             | 4.8                 | 200         | 1.0                 | 2,000            | 13.8                | 5,300       | 26.2                |
| ND    | 1,800           | 15.7                | 3,200       | 8.5                 | 800              | 7.0                 | 12,500      | 33.2                |
| OH    | 1,100           | 5.1                 | 1,400       | 4.5                 | 1,700            | 7.9                 | 3,800       | 12.2                |
| OK    | 4,400           | 4.5                 | 3,700       | 3.0                 | 9,800            | 10.0                | 34,000      | 27.1                |
| OR    | 200             | 0.9                 | 1,400       | 3.7                 | 1,400            | 6.2                 | 6,900       | 18.2                |
| PA    | 400             | 1.3                 | 900         | 2.1                 | 5,100            | 15.9                | 6,500       | 15.1                |
| RI    |                 |                     |             |                     |                  |                     |             |                     |
| SC    | 300             | 5.2                 | 600         | 7.0                 | 1,300            | 22.4                | 3,400       | 39.5                |
| SD    | 5,200           | 9.9                 | 12,200      | 14.8                | 2,800            | 5.3                 | 15,500      | 18.7                |
| TN    | 1,700           | 4.6                 | 3,400       | 5.9                 | 7,700            | 20.9                | 12,800      | 22.2                |
| TX    | 23,600          | 8.0                 | 10,500      | 4.5                 | 44,400           | 15.0                | 44,000      | 18.7                |
| UT    | 700             | 4.7                 | 2,900       | 12.3                | 1,000            | 6.7                 | 3,100       | 13.2                |
| VT    |                 |                     | 100         | 1.3                 | 1,000            | 16.9                | 600         | 7.7                 |
| VA    | 1,100           | 4.3                 | 4,400       | 8.4                 | 3,900            | 15.2                | 15,300      | 29.3                |
| WA    | 300             | 1.5                 | 800         | 3.7                 | 1,300            | 6.5                 | 3,200       | 15.0                |
| WV    | 400             | 5.8                 | 2,600       | 27.4                | 1,200            | 17.4                | 1,800       | 18.9                |
| WI    | 1,500           | 2.3                 | 4,200       | 3.1                 | 7,200            | 11.1                | 6,200       | 4.5                 |
| WY    | 1,000           | 9.5                 | 6,000       | 21.8                | 800              | 7.6                 | 7,000       | 25.5                |
| Unpub | 300             |                     | 200         |                     | 100              |                     | 100         |                     |
| US    | 110,000         | 6.5                 | 165,000     | 7.6                 | 187,000          | 11.1                | 385,000     | 17.7                |

<sup>1</sup> Missing data are less than 100 head for the State or not published to avoid disclosure of individual operations. Data not published are included in U.S. total. Totals may not add due to rounding.

**Losses of Cattle and Calves: Number and Percent from Poisoning and Theft,  
by State and United States, 2005 <sup>1</sup>**

| State | Poisoning   |                  |             |                  | Theft       |                  |             |                  |
|-------|-------------|------------------|-------------|------------------|-------------|------------------|-------------|------------------|
|       | Cattle      | % Total Non-Pred | Calves      | % Total Non Pred | Cattle      | % Total Non-Pred | Calves      | % Total Non-Pred |
|       | <i>Head</i> | <i>Percent</i>   | <i>Head</i> | <i>Percent</i>   | <i>Head</i> | <i>Percent</i>   | <i>Head</i> | <i>Percent</i>   |
| AL    | 400         | 2.1              |             |                  |             |                  | 200         | 0.9              |
| AZ    | 900         | 3.9              | 200         | 1.0              |             |                  | 200         | 1.0              |
| AR    | 500         | 1.8              | 700         | 1.8              | 400         | 1.4              | 500         | 1.3              |
| CA    | 200         | 0.2              |             |                  | 800         | 0.8              | 1,900       | 1.2              |
| CO    | 1,900       | 3.9              | 200         | 0.4              |             |                  | 700         | 1.4              |
| CT    |             |                  |             |                  |             |                  |             |                  |
| DE    |             |                  |             |                  |             |                  |             |                  |
| FL    | 1,300       | 5.6              |             |                  | 100         | 0.4              |             |                  |
| GA    | 400         | 2.1              | 100         | 0.4              |             |                  |             |                  |
| HI    |             |                  |             |                  |             |                  |             |                  |
| ID    | 500         | 1.2              | 300         | 0.5              | 100         | 0.2              | 100         | 0.2              |
| IL    |             |                  | 400         | 1.2              |             |                  |             |                  |
| IN    |             |                  |             |                  |             |                  |             |                  |
| IA    | 200         | 0.3              |             |                  |             |                  |             |                  |
| KS    | 800         | 0.6              | 400         | 0.6              | 500         | 0.4              | 100         | 0.2              |
| KY    | 600         | 1.8              | 300         | 0.4              | 100         | 0.3              |             |                  |
| LA    |             |                  |             |                  |             |                  |             |                  |
| ME    |             |                  |             |                  |             |                  |             |                  |
| MD    |             |                  |             |                  |             |                  |             |                  |
| MA    | 100         | 10.0             |             |                  |             |                  |             |                  |
| MI    |             |                  |             |                  |             |                  |             |                  |
| MN    | 200         | 0.5              |             |                  | 100         | 0.2              |             |                  |
| MS    | 200         | 1.0              | 200         | 0.8              |             |                  |             |                  |
| MO    | 1,900       | 2.8              | 2,000       | 1.7              | 700         | 1.0              | 200         | 0.2              |
| MT    | 800         | 4.1              | 300         | 0.7              |             |                  | 300         | 0.7              |
| NE    | 800         | 0.8              | 500         | 0.7              |             |                  | 300         | 0.4              |
| NV    | 200         | 3.4              |             |                  | 600         | 10.3             | 200         | 1.7              |
| NH    |             |                  |             |                  |             |                  |             |                  |
| NJ    |             |                  |             |                  |             |                  |             |                  |
| NM    | 700         | 2.9              | 600         | 2.0              |             |                  |             |                  |
| NY    | 100         | 0.3              |             |                  |             |                  |             |                  |
| NC    |             |                  |             |                  |             |                  |             |                  |
| ND    | 100         | 0.9              |             |                  | 200         | 1.7              |             |                  |
| OH    | 500         | 2.3              | 800         | 2.6              |             |                  |             |                  |
| OK    | 200         | 0.2              | 1,100       | 0.9              | 900         | 0.9              | 1,100       | 0.9              |
| OR    | 400         | 1.8              | 600         | 1.6              |             |                  | 100         | 0.3              |
| PA    | 300         | 0.9              | 300         | 0.7              |             |                  |             |                  |
| RI    |             |                  |             |                  |             |                  |             |                  |
| SC    |             |                  |             |                  | 300         | 5.2              |             |                  |
| SD    | 200         | 0.4              | 300         | 0.4              | 400         | 0.8              | 400         | 0.5              |
| TN    | 400         | 1.1              | 800         | 1.4              |             |                  | 600         | 1.0              |
| TX    | 4,500       | 1.5              | 1,500       | 0.6              | 3,300       | 1.1              | 1,800       | 0.8              |
| UT    | 1,200       | 8.1              | 300         | 1.3              | 500         | 3.4              |             |                  |
| VT    | 100         | 1.7              |             |                  |             |                  |             |                  |
| VA    | 500         | 2.0              | 500         | 1.0              | 100         | 0.4              | 1,200       | 2.3              |
| WA    | 100         | 0.5              |             |                  | 300         | 1.5              |             |                  |
| WV    | 400         | 5.8              |             |                  |             |                  | 100         | 1.1              |
| WI    | 400         | 0.6              | 2,600       | 1.9              |             |                  |             |                  |
| WY    | 800         | 7.6              | 700         | 2.5              | 100         | 1.0              | 500         | 1.8              |
| Unpub | 200         |                  | 300         |                  | 500         |                  | 500         |                  |
| US    | 23,000      | 1.4              | 16,000      | 0.7              | 10,000      | 0.6              | 11,000      | 0.5              |

<sup>1</sup> Missing data are less than 100 head for the State or not published to avoid disclosure of individual operations. Data not published are included in U.S. total. Totals may not add due to rounding.

**Losses of Cattle and Calves: Number from Other and Unknown Causes,  
by State and United States, 2005 <sup>1</sup>**

| State | Other Non-Predator |                  |             |                  | Unknown Non-Predator |                  |             |                  |
|-------|--------------------|------------------|-------------|------------------|----------------------|------------------|-------------|------------------|
|       | Cattle             | % Total Non-Pred | Calves      | % Total Non-Pred | Cattle               | % Total Non-Pred | Calves      | % Total Non-Pred |
|       | <i>Head</i>        | <i>Percent</i>   | <i>Head</i> | <i>Percent</i>   | <i>Head</i>          | <i>Percent</i>   | <i>Head</i> | <i>Percent</i>   |
| AL    | 4,900              | 25.1             | 1,700       | 7.6              | 3,100                | 15.9             | 5,300       | 23.6             |
| AZ    | 500                | 2.1              |             |                  | 14,700               | 63.1             | 2,700       | 13.9             |
| AR    | 5,200              | 18.4             | 1,000       | 2.6              | 5,200                | 18.4             | 6,100       | 15.8             |
| CA    | 6,600              | 6.7              | 3,800       | 2.4              | 5,800                | 5.9              | 9,300       | 5.8              |
| CO    | 3,200              | 6.5              | 700         | 1.4              | 3,900                | 7.9              | 4,000       | 7.8              |
| CT    | 100                | 11.1             |             |                  |                      |                  |             |                  |
| DE    |                    |                  |             |                  | 400                  | 66.7             | 500         | 71.4             |
| FL    | 4,200              | 18.0             | 900         | 3.1              | 4,500                | 19.3             | 8,600       | 29.8             |
| GA    | 4,600              | 23.8             | 500         | 2.0              | 1,200                | 6.2              | 3,200       | 12.7             |
| HI    | 400                | 14.3             | 200         | 11.8             | 1,900                | 67.9             | 1,100       | 64.7             |
| ID    | 2,000              | 4.8              | 1,000       | 1.6              | 17,300               | 41.7             | 10,000      | 16.4             |
| IL    | 2,800              | 13.5             | 200         | 0.6              | 1,800                | 8.7              | 2,900       | 8.8              |
| IN    | 1,600              | 10.9             | 800         | 2.9              | 3,000                | 20.4             | 2,200       | 7.9              |
| IA    | 6,300              | 9.7              | 5,000       | 4.6              | 4,300                | 6.6              | 6,100       | 5.6              |
| KS    | 7,900              | 5.9              | 2,500       | 3.8              | 3,000                | 2.2              | 5,000       | 7.6              |
| KY    | 4,700              | 14.0             | 1,200       | 1.7              | 7,600                | 22.6             | 14,400      | 20.5             |
| LA    | 2,600              | 10.4             | 300         | 1.8              | 2,600                | 10.4             | 1,400       | 8.6              |
| ME    | 200                | 12.5             | 100         | 3.2              | 200                  | 12.5             | 600         | 19.4             |
| MD    | 100                | 3.3              |             |                  | 800                  | 26.7             | 1,600       | 32.7             |
| MA    |                    |                  | 100         | 11.1             |                      |                  |             |                  |
| MI    | 1,200              | 4.8              | 400         | 0.9              | 1,500                | 6.0              | 2,300       | 4.9              |
| MN    | 5,100              | 12.2             | 3,400       | 4.2              | 4,700                | 11.2             | 3,500       | 4.4              |
| MS    | 5,900              | 28.4             | 1,100       | 4.2              | 2,700                | 13.0             | 4,000       | 15.2             |
| MO    | 16,200             | 23.6             | 6,800       | 5.9              | 10,700               | 15.6             | 10,100      | 8.7              |
| MT    | 3,500              | 18.0             | 900         | 2.1              | 4,200                | 21.6             | 5,300       | 12.2             |
| NE    | 6,300              | 6.7              | 1,900       | 2.6              | 10,600               | 11.2             | 8,800       | 12.1             |
| NV    | 600                | 10.3             | 200         | 1.7              | 1,200                | 20.7             | 2,400       | 20.2             |
| NH    | 200                | 25.0             | 200         | 20.0             |                      |                  | 200         | 20.0             |
| NJ    | 100                | 10.0             |             |                  | 200                  | 20.0             |             |                  |
| NM    | 3,700              | 15.5             | 300         | 1.0              | 1,600                | 6.7              | 5,300       | 17.5             |
| NY    | 2,300              | 6.6              | 2,600       | 5.3              | 1,900                | 5.4              | 3,700       | 7.5              |
| NC    | 1,600              | 11.0             | 500         | 2.5              | 3,000                | 20.7             | 6,400       | 31.7             |
| ND    | 2,200              | 19.1             | 600         | 1.6              | 1,500                | 13.0             | 3,400       | 9.0              |
| OH    | 900                | 4.2              |             |                  | 1,200                | 5.6              | 1,100       | 3.5              |
| OK    | 15,200             | 15.5             | 3,200       | 2.6              | 11,500               | 11.7             | 14,700      | 11.7             |
| OR    | 2,200              | 9.7              | 800         | 2.1              | 2,700                | 11.9             | 3,500       | 9.2              |
| PA    | 1,500              | 4.7              | 400         | 0.9              | 3,100                | 9.7              | 4,000       | 9.3              |
| RI    |                    |                  |             |                  |                      |                  |             |                  |
| SC    | 1,300              | 22.4             | 200         | 2.3              | 1,200                | 20.7             | 1,600       | 18.6             |
| SD    | 6,400              | 12.1             | 800         | 1.0              | 6,300                | 12.0             | 3,500       | 4.2              |
| TN    | 5,800              | 15.8             | 2,100       | 3.6              | 5,300                | 14.4             | 7,000       | 12.2             |
| TX    | 55,300             | 18.7             | 7,600       | 3.2              | 43,700               | 14.8             | 41,000      | 17.4             |
| UT    | 1,900              | 12.8             | 500         | 2.1              | 2,700                | 18.1             | 1,900       | 8.1              |
| VT    | 300                | 5.1              | 400         | 5.1              | 600                  | 10.2             | 1,100       | 14.1             |
| VA    | 4,000              | 15.6             | 1,100       | 2.1              | 7,200                | 28.1             | 13,400      | 25.7             |
| WA    | 1,400              | 7.0              | 700         | 3.3              | 2,100                | 10.4             | 2,000       | 9.3              |
| WV    | 1,600              | 23.2             | 500         | 5.3              | 900                  | 13.0             | 1,600       | 16.8             |
| WI    | 3,200              | 4.9              | 1,500       | 1.1              | 10,200               | 15.8             | 12,900      | 9.4              |
| WY    | 3,100              | 29.5             | 1,000       | 3.6              |                      |                  |             |                  |
| Unpub | 100                |                  | 300         |                  | 200                  |                  | 300         |                  |
| US    | 211,000            | 12.5             | 60,000      | 2.8              | 224,000              | 13.3             | 250,000     | 11.5             |

<sup>1</sup> Missing data are less than 100 head for the State or not published to avoid disclosure of individual operations. Data not published are included in U.S. total. Totals may not add due to rounding.

**Non-Lethal Methods Used to Prevent Losses of Cattle and Calves to Predators,  
by State and United States, 2005<sup>1 2</sup>**

| State | Guard<br>Animals | Exclusion<br>Fencing | Herding        | Night<br>Penning | Frequent<br>Checks |
|-------|------------------|----------------------|----------------|------------------|--------------------|
|       | <i>Percent</i>   | <i>Percent</i>       | <i>Percent</i> | <i>Percent</i>   | <i>Percent</i>     |
| AL    | 48.8             | 55.5                 | 4.4            | 0.2              | 9.6                |
| AZ    | 35.5             | 53.2                 | 14.3           | 22.9             | 38.2               |
| AR    | 37.7             | 37.8                 | 2.2            |                  | 24.0               |
| CA    | 20.1             | 66.3                 | 0.9            | 5.1              | 8.2                |
| CO    | 16.5             | 27.0                 | 7.6            | 9.6              | 38.9               |
| CT    | 12.7             | 27.0                 | 4.8            | 69.8             | 52.3               |
| DE    |                  |                      |                |                  |                    |
| FL    | 51.1             | 23.1                 | 5.2            | 0.1              | 26.0               |
| GA    | 42.3             | 57.7                 | 2.1            | 3.6              | 12.0               |
| HI    | 1.7              | 84.1                 | 4.5            |                  | 10.7               |
| ID    | 16.9             | 14.8                 | 1.7            | 1.4              | 60.9               |
| IL    | 40.1             | 55.2                 | 5.0            | 11.9             | 26.1               |
| IN    | 23.7             | 17.1                 | 2.3            | 19.6             | 47.2               |
| IA    | 15.4             | 15.9                 |                | 3.2              | 64.0               |
| KS    | 7.2              | 45.9                 | 2.7            |                  | 13.8               |
| KY    | 33.1             | 49.1                 | 2.8            | 3.9              | 7.8                |
| LA    | 25.2             | 52.3                 | 10.8           | 1.8              | 13.5               |
| ME    |                  | 77.8                 |                | 20.7             | 0.8                |
| MD    |                  |                      |                |                  |                    |
| MA    | 25.2             | 63.3                 |                | 30.3             |                    |
| MI    | 70.8             | 29.4                 | 6.4            | 0.8              | 12.6               |
| MN    | 61.9             | 40.2                 | 2.5            | 6.3              | 20.2               |
| MS    | 30.0             | 25.0                 |                | 0.5              | 3.1                |
| MO    | 57.4             | 21.9                 | 5.4            | 1.1              | 15.5               |
| MT    | 21.8             | 21.1                 | 9.6            | 9.9              | 31.4               |
| NE    | 8.5              | 42.7                 | 7.5            | 2.4              | 47.9               |
| NV    |                  | 1.6                  |                | 26.1             | 56.9               |
| NH    | 0.3              | 2.4                  |                | 97.1             |                    |
| NJ    | 40.3             | 70.2                 | 15.6           | 43.6             | 23.5               |
| NM    | 8.6              | 29.5                 | 5.3            | 13.9             | 37.0               |
| NY    |                  | 12.2                 | 77.0           | 8.2              | 70.5               |
| NC    | 22.3             | 46.7                 | 8.7            | 8.1              | 36.3               |
| ND    | 34.5             | 19.7                 | 0.3            | 6.0              | 29.0               |
| OH    | 22.9             | 45.9                 | 0.3            | 7.6              | 12.3               |
| OK    | 49.2             | 32.9                 | 6.8            | 0.2              | 23.3               |
| OR    | 26.2             | 32.0                 | 1.4            | 5.9              | 25.5               |
| PA    | 46.0             | 40.5                 | 9.0            | 17.9             | 28.5               |
| RI    |                  |                      |                |                  |                    |
| SC    | 70.0             | 24.2                 | 0.4            |                  | 8.1                |
| SD    | 21.9             | 4.6                  | 2.7            | 33.6             | 14.7               |
| TN    | 32.9             | 19.2                 | 6.5            | 3.6              | 28.8               |
| TX    | 62.9             | 17.3                 | 0.9            | 10.2             | 15.2               |
| UT    | 32.3             | 49.3                 | 47.9           | 13.0             | 21.8               |
| VT    | 64.8             | 33.0                 |                |                  |                    |
| VA    | 29.6             | 48.9                 | 0.1            | 1.1              | 18.7               |
| WA    | 43.8             | 48.1                 |                | 0.2              | 43.1               |
| WV    | 38.0             | 30.4                 | 1.9            | 3.5              | 52.5               |
| WI    | 54.3             | 28.1                 |                | 9.5              | 10.1               |
| WY    | 20.9             | 20.5                 | 10.0           | 21.6             | 48.0               |
| US    | 38.0             | 34.0                 | 3.8            | 9.7              | 21.8               |

<sup>1</sup> Missing data are not published to avoid disclosure of individual operations.

<sup>2</sup> Use of multiple non-lethal methods may result in percentages summing to greater than 100.



**Non-Lethal Methods Used to Prevent Losses of Cattle and Calves to Predators,  
by State and United States, 2005<sup>1 2</sup>**

| State | Fright<br>Tactics | Livestock<br>Carcass Removal | Culling        | Other<br>Non-lethal |
|-------|-------------------|------------------------------|----------------|---------------------|
|       | <i>Percent</i>    | <i>Percent</i>               | <i>Percent</i> | <i>Percent</i>      |
| AL    | 2.6               | 11.5                         | 8.2            | 2.0                 |
| AZ    | 11.8              | 13.8                         | 40.7           | 1.2                 |
| AR    | 13.4              | 13.5                         | 14.6           | 5.7                 |
| CA    |                   | 10.6                         | 35.5           | 6.3                 |
| CO    | 7.0               | 15.5                         | 14.3           | 0.1                 |
| CT    |                   | 17.5                         | 17.5           | 12.7                |
| DE    |                   |                              |                |                     |
| FL    | 0.5               | 20.4                         | 29.3           | 0.1                 |
| GA    | 0.4               | 6.6                          | 10.4           | 5.4                 |
| HI    | 1.7               | 9.1                          | 7.9            | 8.0                 |
| ID    | 20.6              | 15.0                         | 16.8           | 6.0                 |
| IL    |                   | 17.0                         | 26.7           |                     |
| IN    | 5.7               | 26.7                         | 36.4           | 0.1                 |
| IA    |                   | 2.2                          | 3.3            | 7.1                 |
| KS    |                   | 22.1                         | 30.2           | 0.2                 |
| KY    |                   | 1.1                          | 4.3            | 12.5                |
| LA    | 2.2               | 14.5                         | 3.4            | 13.8                |
| ME    |                   | 2.2                          | 2.2            |                     |
| MD    |                   |                              |                |                     |
| MA    |                   |                              |                | 6.5                 |
| MI    |                   | 15.6                         | 9.1            | 1.6                 |
| MN    | 3.2               | 13.0                         | 19.0           | 5.5                 |
| MS    | 3.1               | 13.1                         | 25.6           | 4.3                 |
| MO    | 1.5               | 11.0                         | 12.5           | 4.6                 |
| MT    | 7.8               | 18.5                         | 31.7           | 11.7                |
| NE    | 2.5               | 50.4                         | 41.1           | 4.0                 |
| NV    | 15.4              | 30.9                         | 30.9           |                     |
| NH    |                   |                              |                | 0.2                 |
| NJ    | 3.4               | 18.9                         | 3.4            | 6.3                 |
| NM    | 25.5              | 44.4                         | 31.5           | 2.0                 |
| NY    | 9.2               | 74.4                         | 89.2           | 17.2                |
| NC    | 3.1               | 27.4                         | 39.7           | 1.0                 |
| ND    | 2.8               | 16.4                         | 19.4           | 11.8                |
| OH    | 4.1               | 6.8                          | 12.2           | 15.4                |
| OK    | 2.5               | 29.4                         | 5.9            | 11.2                |
| OR    | 1.6               | 41.4                         | 47.6           | 4.3                 |
| PA    | 2.9               | 18.2                         | 22.4           | 4.7                 |
| RI    |                   |                              |                |                     |
| SC    | 0.7               | 5.5                          | 5.2            |                     |
| SD    | 4.4               | 22.7                         | 28.6           | 12.0                |
| TN    | 0.8               | 32.3                         | 30.1           | 5.9                 |
| TX    | 0.1               | 5.2                          | 15.3           | 8.4                 |
| UT    |                   | 4.5                          | 38.0           |                     |
| VT    |                   |                              | 1.5            | 0.7                 |
| VA    |                   | 28.2                         | 42.1           | 13.9                |
| WA    | 4.2               | 13.6                         | 14.1           | 13.7                |
| WV    |                   | 4.7                          | 19.9           | 6.5                 |
| WI    | 2.6               | 14.7                         | 9.4            | 6.8                 |
| WY    | 0.5               | 32.7                         | 42.0           | 12.2                |
| US    | 3.0               | 16.5                         | 19.6           | 6.2                 |

<sup>1</sup> Missing data are not published to avoid disclosure of individual operations.

<sup>2</sup> Use of multiple non-lethal methods may result in percentages summing to greater than 100.

## Reliability of Cattle and Calves Predator Loss Estimates

**Survey Procedures:** A random sample of U.S. producers was surveyed to provide data for these estimates. Survey procedures ensured that all cattle producers, regardless of size, had a chance to be included in the survey. Large producers were sampled more heavily than small operations. About 50,000 operators were contacted during the first half of January by mail, telephone and face-to-face personal interview.

**Estimation Procedures:** These estimates of death loss by cause were prepared by the Livestock Branch, NASS, and reviewed by the 49 States involved. Total cattle and calf death losses from all causes were published in the 2006 "*Meat Animals-Production, Disposition, and Income*" (released April 27, 2006). In setting the predator and non-predator loss estimates, first total predator and non-predator losses were estimated as a percent of total losses, then specific predator and non-predator losses were estimated as a percent of total predator and non-predator losses. All published loss estimates were rounded to the nearest 100 head. Value estimates were rounded to the nearest \$1,000. State estimates of less than 100 head are not published, but are included in U.S. totals.

**Revision Policy:** Revisions to previous estimates are made to improve the current estimate. Previous year estimates are subject to revision when current estimates are made. Estimates for losses from all causes are subject to revision in next year's "*Meat Animals-Production, Disposition, and Income*". No revision to predator losses is planned.

**Reliability:** Since all cattle operators are not included in the sample, survey estimates are subject to sampling variability. Survey results are also subject to non-sampling errors such as omissions, duplications, and mistakes in reporting, recording, and processing the data. The effects of these non-sampling errors cannot be measured directly. They are minimized through rigid quality controls in the data collection process and through a careful review of all reported data for consistency and reasonableness.

## Information Contacts

Listed below are the commodity specialists in the Livestock Branch of the National Agricultural Statistics Service to contact for additional information.

|                                                           |                |
|-----------------------------------------------------------|----------------|
| Dan Kerestes, Chief, Livestock Branch .....               | (202) 720-3570 |
| William Weaver, Head, Livestock Section .....             | (202) 720-3570 |
| Bruce Boess - Hogs and Pigs .....                         | (202) 720-3106 |
| Shawn Clark - Dairy Products .....                        | (202) 690-3236 |
| Scott Hollis - Sheep, Lambs, Wool, Goats and Mohair ..... | (202) 720-4751 |
| Mike Miller - Cattle .....                                | (202) 720-3040 |
| Katy Paulsen - Livestock Slaughter .....                  | (515) 284-4340 |
| Ann Summa - Milk and Milk Cows .....                      | (202) 720-3278 |
| Charmaine Wilson - Dairy Products Prices .....            | (202) 690-2168 |

## ACCESS TO REPORTS!!

---

For your convenience, there are several ways to obtain NASS reports, data products, and services:

### INTERNET ACCESS

All NASS reports are available free of charge on the worldwide Internet. For access, connect to the Internet and go to the NASS Home Page at: **[www.nass.usda.gov](http://www.nass.usda.gov)**.

### E-MAIL SUBSCRIPTION

All NASS reports are available by subscription free of charge direct to your e-mail address. Starting with the NASS Home Page at **[www.nass.usda.gov](http://www.nass.usda.gov)**, under the right navigation, *Receive reports by Email*, click on **National** or **State**. Follow the instructions on the screen.

-----

### PRINTED REPORTS OR DATA PRODUCTS

**CALL OUR TOLL-FREE ORDER DESK: 800-999-6779 (U.S. and Canada)**  
**Other areas, please call 703-605-6220      FAX: 703-605-6900**  
**(Visa, MasterCard, check, or money order acceptable for payment.)**

-----

### ASSISTANCE

For **assistance** with general agricultural statistics or further information about NASS or its products or services, contact the **Agricultural Statistics Hotline** at **800-727-9540**, 7:30 a.m. to 4:00 p.m. ET, or e-mail: **[nass@nass.usda.gov](mailto:nass@nass.usda.gov)**.

The U.S. Department of Agriculture (USDA) prohibits discrimination in all its programs and activities on the basis of race, color, national origin, age, disability, and where applicable, sex, marital status, familial status, parental status, religion, sexual orientation, genetic information, political beliefs, reprisal, or because all or part of an individual's income is derived from any public assistance program. (Not all prohibited bases apply to all programs.) Persons with disabilities who require alternative means for communication of program information (Braille, large print, audiotape, etc.) should contact USDA's TARGET Center at (202) 720-2600 (voice and TDD).

To file a complaint of discrimination, write to USDA, Director, Office of Civil Rights, 1400 Independence Avenue, S.W., Washington, D.C. 20250-9410, or call (800) 795-3272 (voice) or (202) 720-6382 (TDD). USDA is an equal opportunity provider and employer.
